# Supplementary material for: Rational optimization of a transcription factor activation domain inhibitor
Source: PubMed Central journal article supplement (PMC10716049; doi:10.1038/s41594-023-01159-5), 2023-12-04
Supplement: 41594_2023_1159_MOESM2_ESM.pdf [file 41594_2023_1159_MOESM2_ESM.pdf]

## Reporting Summary

Nature Portfolio wishes to improve the reproducibility of the work that we publish. This form provides structure for consistency and transparency in reporting. For further information on Nature Portfolio policies, see our [Editorial Policies](#) and the [Editorial Policy Checklist](#).

### Statistics

For all statistical analyses, confirm that the following items are present in the figure legend, table legend, main text, or Methods section.

- | n/a                                 | Confirmed                                                                                                                                                                                                                                                                                      |
|-------------------------------------|------------------------------------------------------------------------------------------------------------------------------------------------------------------------------------------------------------------------------------------------------------------------------------------------|
| <input type="checkbox"/>            | <input checked="" type="checkbox"/> The exact sample size ( $n$ ) for each experimental group/condition, given as a discrete number and unit of measurement                                                                                                                                    |
| <input type="checkbox"/>            | <input checked="" type="checkbox"/> A statement on whether measurements were taken from distinct samples or whether the same sample was measured repeatedly                                                                                                                                    |
| <input type="checkbox"/>            | <input checked="" type="checkbox"/> The statistical test(s) used AND whether they are one- or two-sided<br><i>Only common tests should be described solely by name; describe more complex techniques in the Methods section.</i>                                                               |
| <input checked="" type="checkbox"/> | <input type="checkbox"/> A description of all covariates tested                                                                                                                                                                                                                                |
| <input checked="" type="checkbox"/> | <input type="checkbox"/> A description of any assumptions or corrections, such as tests of normality and adjustment for multiple comparisons                                                                                                                                                   |
| <input type="checkbox"/>            | <input checked="" type="checkbox"/> A full description of the statistical parameters including central tendency (e.g. means) or other basic estimates (e.g. regression coefficient) AND variation (e.g. standard deviation) or associated estimates of uncertainty (e.g. confidence intervals) |
| <input type="checkbox"/>            | <input checked="" type="checkbox"/> For null hypothesis testing, the test statistic (e.g. $F$ , $t$ , $r$ ) with confidence intervals, effect sizes, degrees of freedom and $P$ value noted<br><i>Give <math>P</math> values as exact values whenever suitable.</i>                            |
| <input checked="" type="checkbox"/> | <input type="checkbox"/> For Bayesian analysis, information on the choice of priors and Markov chain Monte Carlo settings                                                                                                                                                                      |
| <input checked="" type="checkbox"/> | <input type="checkbox"/> For hierarchical and complex designs, identification of the appropriate level for tests and full reporting of outcomes                                                                                                                                                |
| <input type="checkbox"/>            | <input checked="" type="checkbox"/> Estimates of effect sizes (e.g. Cohen's $d$ , Pearson's $r$ ), indicating how they were calculated                                                                                                                                                         |

*Our web collection on [statistics for biologists](#) contains articles on many of the points above.*

### Software and code

Policy information about [availability of computer code](#)

|                 |                                                                                                                                                                                                                                                                                                                                                                                                                                                                                                                                                                                                                                                                                                           |
|-----------------|-----------------------------------------------------------------------------------------------------------------------------------------------------------------------------------------------------------------------------------------------------------------------------------------------------------------------------------------------------------------------------------------------------------------------------------------------------------------------------------------------------------------------------------------------------------------------------------------------------------------------------------------------------------------------------------------------------------|
| Data collection | NMR data was acquired with TOPSPIN 4.0.8 (Bruker) and processed with NMRPipe 212_64 and qMDD 3.2. FTIR data was acquired with OPUS MIR Tensor 27. MD simulations were run with GROMACS 2019.270-72 patched with PLUMED v2.6.0. RNA-seq data was quality-checked with FASTQC 0.11.9 and aligned to the Homo sapiens genome hg19 with STAR aligner v.2.7.5a with standard settings.                                                                                                                                                                                                                                                                                                                         |
| Data analysis   | NMR data was analyzed with CcpNmr Ansysys 2.4.2 and delta2D (online). FTIR data was analyzed with Peak Fit 4.2. Live cell microscopy data was analyzed with Fiji imaging software (ImageJ 1.52p), LAS-AF and LAS-X (2.5.6, Leica). FRAP data was analyzed with EasyFRAP (online). BioID-MS data was analyzed with SAINTq. The images used for the granularity were analyzed with ZEN Blue 3.2. The LNCaP dose response curves were processed with the DRC package in R. MD trajectories were analyzed with python packages MDtraj, numpy and pyblock. The differential expression analysis was conducted with the DESeq2 R/bioconductor package and the gene set enrichment with packages fgsea and DOSE. |

For manuscripts utilizing custom algorithms or software that are central to the research but not yet described in published literature, software must be made available to editors and reviewers. We strongly encourage code deposition in a community repository (e.g. GitHub). See the Nature Portfolio [guidelines for submitting code & software](#) for further information.

## Data

Policy information about [availability of data](#)

All manuscripts must include a [data availability statement](#). This statement should provide the following information, where applicable:

- Accession codes, unique identifiers, or web links for publicly available datasets
- A description of any restrictions on data availability
- For clinical datasets or third party data, please ensure that the statement adheres to our [policy](#)

The RNA-sequencing data has been deposited in the NCBI GEO database (<https://www.ncbi.nlm.nih.gov/geo/>) with accession codes GSE206853 and GSE232849. The NMR assignments for constructs 441-558 and the AR AD have been deposited in the BMRB (<https://bmrbl.io/>) with accession codes 51476 and 51480, respectively. The molecular dynamics simulation trajectories, GROMACS input files, and analysis code have been deposited in Zenodo (<https://doi.org/10.5281/zenodo.8210256>). The raw data used to produce all figures is available as Source Data files.

## Human research participants

Policy information about [studies involving human research participants and Sex and Gender in Research](#).

|                             |                                                         |
|-----------------------------|---------------------------------------------------------|
| Reporting on sex and gender | <input type="text" value="Not relevant to this study"/> |
| Population characteristics  | <input type="text" value="Not relevant to this study"/> |
| Recruitment                 | <input type="text" value="Not relevant to this study"/> |
| Ethics oversight            | <input type="text" value="Not relevant to this study"/> |

Note that full information on the approval of the study protocol must also be provided in the manuscript.

## Field-specific reporting

Please select the one below that is the best fit for your research. If you are not sure, read the appropriate sections before making your selection.

Life sciences       Behavioural & social sciences       Ecological, evolutionary & environmental sciences

For a reference copy of the document with all sections, see [nature.com/documents/nr-reporting-summary-flat.pdf](https://www.nature.com/documents/nr-reporting-summary-flat.pdf)

## Life sciences study design

All studies must disclose on these points even when the disclosure is negative.

|                 |                                                                                                                                                                                                                      |
|-----------------|----------------------------------------------------------------------------------------------------------------------------------------------------------------------------------------------------------------------|
| Sample size     | <input type="text" value="No statistical method was used to determine sample size. Sample size was determined by the number of relevant experimental observations e.g. number of cells, and always larger than 1."/> |
| Data exclusions | <input type="text" value="No data was excluded in the studies."/>                                                                                                                                                    |
| Replication     | <input type="text" value="Biological replicates were used in all experiments in cells."/>                                                                                                                            |
| Randomization   | <input type="text" value="Randomization was considered not necessary in this study."/>                                                                                                                               |
| Blinding        | <input type="text" value="Blinding was considered not necessary in this study."/>                                                                                                                                    |

## Reporting for specific materials, systems and methods

We require information from authors about some types of materials, experimental systems and methods used in many studies. Here, indicate whether each material, system or method listed is relevant to your study. If you are not sure if a list item applies to your research, read the appropriate section before selecting a response.

## Materials &amp; experimental systems

## Methods

|                                     |                                                                 |
|-------------------------------------|-----------------------------------------------------------------|
| n/a                                 | Involved in the study                                           |
| <input type="checkbox"/>            | <input checked="" type="checkbox"/> Antibodies                  |
| <input type="checkbox"/>            | <input checked="" type="checkbox"/> Eukaryotic cell lines       |
| <input checked="" type="checkbox"/> | <input type="checkbox"/> Palaeontology and archaeology          |
| <input type="checkbox"/>            | <input checked="" type="checkbox"/> Animals and other organisms |
| <input checked="" type="checkbox"/> | <input type="checkbox"/> Clinical data                          |
| <input checked="" type="checkbox"/> | <input type="checkbox"/> Dual use research of concern           |

|                                     |                                                 |
|-------------------------------------|-------------------------------------------------|
| n/a                                 | Involved in the study                           |
| <input checked="" type="checkbox"/> | <input type="checkbox"/> ChIP-seq               |
| <input checked="" type="checkbox"/> | <input type="checkbox"/> Flow cytometry         |
| <input checked="" type="checkbox"/> | <input type="checkbox"/> MRI-based neuroimaging |

## Antibodies

## Antibodies used

Androgen Receptor [ER179(2)] Abcam Cat#ab108341  
 Streptavidin antibody, Alexa Fluor™ 488 conjugate ThermoScientific Cat #S11223  
 Alexa Fluor 488 Goat anti-Rabbit IgG (H+L) ThermoScientific Cat #A11008  
 Androgen Receptor (441) SCBT Cat #sc-7305  
 STAR 635P Abberior Cat #ST635P-1001  
 Goat anti-Rabbit IgG (H+L) Secondary Antibody, HRP Invitrogen Cat #65-6120  
 Goat anti-Mouse IgG (H+L) Secondary Antibody, HRP Invitrogen Cat #G-21040  
 Nup153 antibody (QE5) Abcam Cat #ab24700  
 Med1 antibody Abcam Cat #ab64965  
 ARID1A/BAF250A (D2A8U) CellSignal #12354  
 GADPH Abcam Cat#ab59164  
 anti-mouse RD-680 conjugated LI-COR CatR #926-68072  
 anti-rabbit CW-800 conjugated LI-COR CatR #926-32211

## Validation

All antibodies used in this study are commercial, validated by the manufacturer for the relevant applications and widely used, as described in the following websites:

<https://www.abcam.com/products/primary-antibodies/androgen-receptor-antibody-er1792-chip-grade-ab108341.html>  
<https://www.thermofisher.com/order/catalog/product/es/en/S11223>  
<https://www.thermofisher.com/antibody/product/Goat-anti-Rabbit-IgG-H-L-Cross-Adsorbed-Secondary-Antibody-Polyclonal/A-11008>  
<https://www.scbt.com/p/ar-antibody-441>  
<https://abberior.shop/abberior-STAR-635P>  
<https://www.thermofisher.com/antibody/product/Goat-anti-Rabbit-IgG-H-L-Secondary-Antibody-Polyclonal/65-6120>  
<https://www.thermofisher.com/antibody/product/Goat-anti-Mouse-IgG-H-L-Cross-Adsorbed-Secondary-Antibody-Polyclonal/G-21040>  
<https://www.abcam.com/products/primary-antibodies/nup153-antibody-qe5-ab24700.html>  
<https://www.abcam.com/products/primary-antibodies/trap220med1-antibody-ab64965.html>  
<https://www.cellsignal.com/products/primary-antibodies/arid1a-baf250a-d2a8u-rabbit-mab/12354>  
<https://www.abcam.com/products/primary-antibodies/gapdh-antibody-ff26a-ab59164.html>  
<https://www.licor.com/bio/reagents/irdye-680rd-donkey-anti-mouse-igg-secondary-antibody>  
<https://www.licor.com/bio/reagents/irdye-800cw-goat-anti-rabbit-igg-secondary-antibody>

## Eukaryotic cell lines

Policy information about [cell lines and Sex and Gender in Research](#)

## Cell line source(s)

HEK293T cells ATCC CRL-3216  
 PC3 cells ATCC CRL-1435  
 LNCaP clone FGC ATCC CRL-1740  
 LNCaP95-D3 Leung et al., 2021 (generated by the laboratory of M. D. Sadar)  
 Hela AR-eGFP 24Q Piol et al., 2023 (generated by the laboratory of M. Pennuto)

## Authentication

None of the cells were authenticated

## Mycoplasma contamination

All cell lines tested negative

Commonly misidentified lines  
(See [ICLAC](#) register)

No commonly misidentified cell lines were used in this study.

## Animals and other research organisms

Policy information about [studies involving animals](#); [ARRIVE guidelines](#) recommended for reporting animal research, and [Sex and Gender in Research](#)

## Laboratory animals

Six to eight-weeks-old male mice (NOD-scid IL2Rgammanull).

Wild animals

No wild animals were used in this study.

Reporting on sex

Findings apply to only male animals

Field-collected samples

Not field collected samples were used in this study.

Ethics oversight

University of British Columbia Animal Care Committee (A18-0077)

Note that full information on the approval of the study protocol must also be provided in the manuscript.
