# Supplementary material for: Rational optimization of a transcription factor activation domain inhibitor
Source: PubMed Central journal article supplement (PMC10716049; doi:10.1038/s41594-023-01159-5), 2023-12-04

Fig. 3G

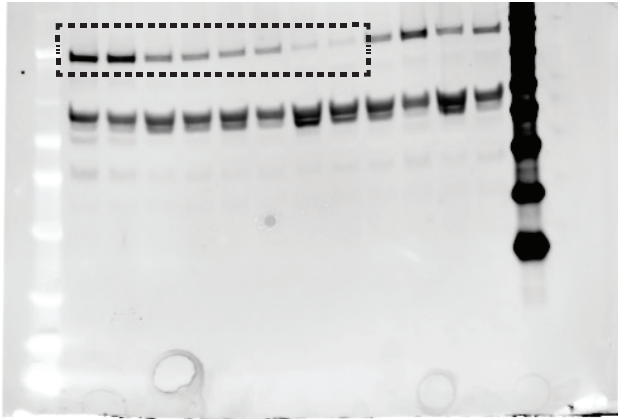

Extended Data Fig. 3C

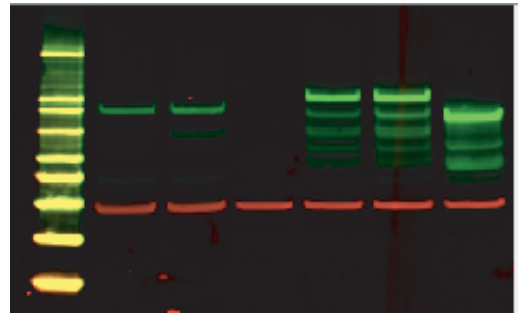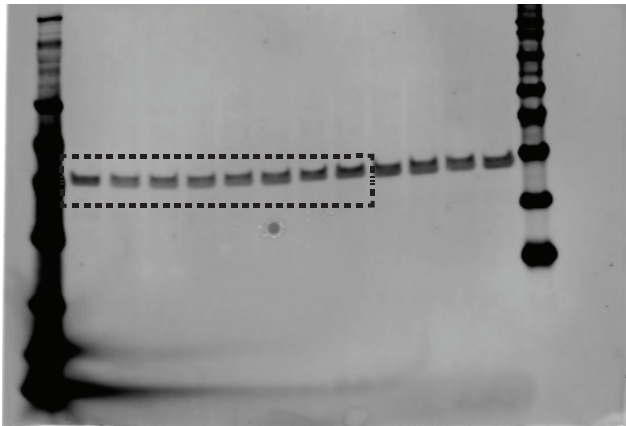

Extended Data Fig. 6A

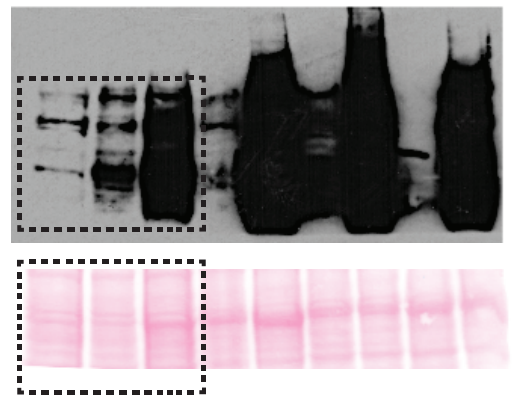

Extended Data Fig. 3E

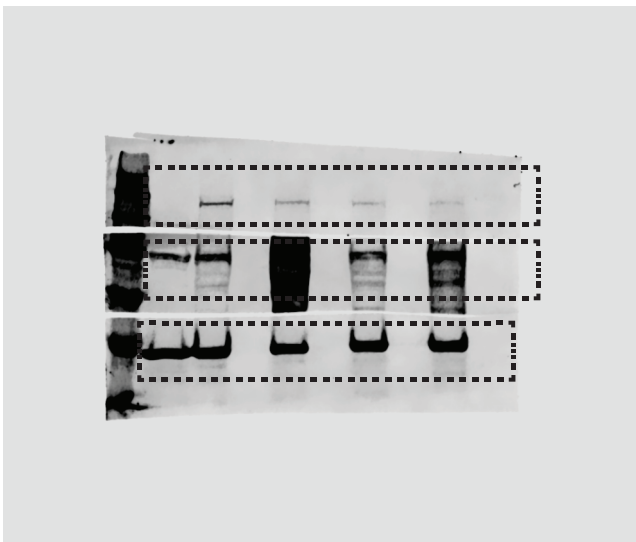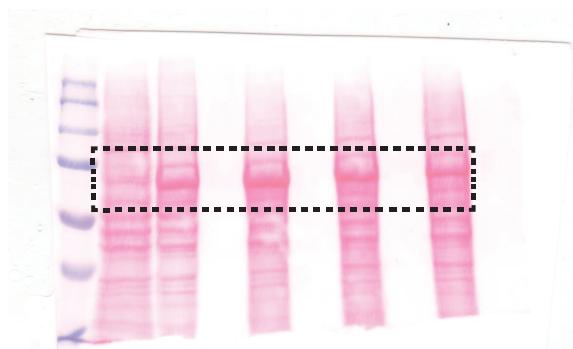

Supplement: 41594_2023_1159_MOESM27_ESM.pdf [file 41594_2023_1159_MOESM27_ESM.pdf]
