# Supplementary material for: Rational optimization of a transcription factor activation domain inhibitor
Source: Nat Struct Mol Biol. 2023 Dec 4;30(12):1958–69. doi: 10.1038/s41594-023-01159-5 (PMC10716049; doi:10.1038/s41594-023-01159-5)
Supplement: Supplementary file 7 — BioID-MS data corresponding to Fig. 2 and Extended Data Fig. 3. The Bait tab contains the bait IDs used for SAINTq analysis, and the SAINTq output tab is the analysis output. The data summary is a pivot table generated from the output data. The ‘WT Top 75 GO’ and ‘Y22S Top 75 GO’ tabs are the output data from STRING analysis of the top 75 most abundant proteins with a BFDR ≤ 0.02 and a FC ≥ 3 from the tDHT = 60 min samples. [file 41594_2023_1159_MOESM7_ESM.xlsx]

## Sheet: Bait
Bait input file for SAINTq
	IP	Bait	Indicator	Soft
0	4104_ML_AR-22Y-0000DHT_T_R01	AR-22Y-0000DHT	T	MQ
1	4104_ML_AR-22Y-0000DHT_T_R02	AR-22Y-0000DHT	T	MQ
2	4104_ML_AR-22Y-0000DHT_T_R03	AR-22Y-0000DHT	T	MQ
3	4104_ML_AR-22Y-0060DHT_T_R01	AR-22Y-0060DHT	T	MQ
4	4104_ML_AR-22Y-0060DHT_T_R02	AR-22Y-0060DHT	T	MQ
5	4104_ML_AR-22Y-0060DHT_T_R03	AR-22Y-0060DHT	T	MQ
6	4104_ML_AR-WT-0000DHT_T_R01	AR-WT-0000DHT	T	MQ
7	4104_ML_AR-WT-0000DHT_T_R02	AR-WT-0000DHT	T	MQ
8	4104_ML_AR-WT-0000DHT_T_R03	AR-WT-0000DHT	T	MQ
9	4104_ML_AR-WT-0060DHT_T_R01	AR-WT-0060DHT	T	MQ
10	4104_ML_AR-WT-0060DHT_T_R02	AR-WT-0060DHT	T	MQ
11	4104_ML_AR-WT-0060DHT_T_R03	AR-WT-0060DHT	T	MQ
12	4104_ML_Flag_C_R01	Flag	C	MQ
13	4104_ML_Flag_C_R02	Flag	C	MQ
14	4104_ML_Flag_C_R03	Flag	C	MQ

## Sheet: SAINTq output
SAINTq output file
	Experiment	Bait	Prey	Gene	Description	CRAP score	T count	T sum	T mean	T replicates	C count	C sum	C mean	C replicates	p mean	FC	BFDR	Soft	SAINT	Variable
0	4104_ML_FinalNorm	AR-22Y-0000DHT	A0AVT1	UBA6	Ubiquitin-like modifier-activating enzyme 6 (Ubiquitin-activating enzyme 6) (EC 6.2.1.45) (Monocyte protein 4) (MOP-4) (Ubiquitin-activating enzyme E1-like protein 2) (E1-L2)	0.468186	NAN|3.2E+06|3.0E+06	6.15084e+06	3.07542e+06	3	9.9E+06|1.0E+07|8.5E+06	2.88225e+07	9.60751e+06	3	0.001	0.320106	0.6034	MQ	q	I
1	4104_ML_FinalNorm	AR-22Y-0060DHT	A0AVT1	UBA6	Ubiquitin-like modifier-activating enzyme 6 (Ubiquitin-activating enzyme 6) (EC 6.2.1.45) (Monocyte protein 4) (MOP-4) (Ubiquitin-activating enzyme E1-like protein 2) (E1-L2)	0.468186	NAN|NAN|1.5E+06	1.5365e+06	1.5365e+06	3	9.9E+06|1.0E+07|8.5E+06	2.88225e+07	9.60751e+06	3	0	0.159927	0.6339	MQ	q	I
2	4104_ML_FinalNorm	AR-WT-0000DHT	A0AVT1	UBA6	Ubiquitin-like modifier-activating enzyme 6 (Ubiquitin-activating enzyme 6) (EC 6.2.1.45) (Monocyte protein 4) (MOP-4) (Ubiquitin-activating enzyme E1-like protein 2) (E1-L2)	0.468186	5.7E+06|5.5E+06|5.3E+06	1.65526e+07	5.51752e+06	3	9.9E+06|1.0E+07|8.5E+06	2.88225e+07	9.60751e+06	3	0.0082	0.574293	0.5137	MQ	q	I
3	4104_ML_FinalNorm	AR-WT-0060DHT	A0AVT1	UBA6	Ubiquitin-like modifier-activating enzyme 6 (Ubiquitin-activating enzyme 6) (EC 6.2.1.45) (Monocyte protein 4) (MOP-4) (Ubiquitin-activating enzyme E1-like protein 2) (E1-L2)	0.468186	1.1E+06|2.1E+06|2.8E+06	5.99395e+06	1.99798e+06	3	9.9E+06|1.0E+07|8.5E+06	2.88225e+07	9.60751e+06	3	0.0005	0.207961	0.6148	MQ	q	I
4	4104_ML_FinalNorm	AR-22Y-0000DHT	A0FGR8	ESYT2	Extended synaptotagmin-2 (E-Syt2) (Chr2Syt)	0.725033	NAN|2.9E+06|2.2E+06	5.09361e+06	2.5468e+06	3	1.4E+07|1.2E+07|1.4E+07	3.92203e+07	1.30734e+07	3	0.0005	0.194808	0.6148	MQ	q	I
5	4104_ML_FinalNorm	AR-22Y-0060DHT	A0FGR8	ESYT2	Extended synaptotagmin-2 (E-Syt2) (Chr2Syt)	0.725033	1.8E+07|2.0E+07|1.7E+07	5.44655e+07	1.81552e+07	3	1.4E+07|1.2E+07|1.4E+07	3.92203e+07	1.30734e+07	3	0.3631	1.38871	0.1301	MQ	q	I
6	4104_ML_FinalNorm	AR-WT-0000DHT	A0FGR8	ESYT2	Extended synaptotagmin-2 (E-Syt2) (Chr2Syt)	0.725033	2.3E+07|2.3E+07|2.7E+07	7.2774e+07	2.4258e+07	3	1.4E+07|1.2E+07|1.4E+07	3.92203e+07	1.30734e+07	3	0.9855	1.85552	0.0007	MQ	q	I
7	4104_ML_FinalNorm	AR-WT-0060DHT	A0FGR8	ESYT2	Extended synaptotagmin-2 (E-Syt2) (Chr2Syt)	0.725033	8.5E+06|1.3E+07|1.7E+07	3.84551e+07	1.28184e+07	3	1.4E+07|1.2E+07|1.4E+07	3.92203e+07	1.30734e+07	3	0.0646	0.980491	0.2981	MQ	q	I
8	4104_ML_FinalNorm	AR-WT-0000DHT	A0JNW5	UHRF1BP1L	UHRF1-binding protein 1-like (Syntaxin-6 Habc-interacting protein of 164 kDa)	0.421712	7.8E+06|4.3E+06|4.4E+06	1.64701e+07	5.49005e+06	3	3.7E+06|3.9E+06|6.9E+06	1.44793e+07	4.82644e+06	3	0.131	1.13749	0.2485	MQ	q	I
9	4104_ML_FinalNorm	AR-WT-0060DHT	A0JNW5	UHRF1BP1L	UHRF1-binding protein 1-like (Syntaxin-6 Habc-interacting protein of 164 kDa)	0.421712	3.3E+06|4.6E+06|1.1E+06	9.0119e+06	3.00397e+06	3	3.7E+06|3.9E+06|6.9E+06	1.44793e+07	4.82644e+06	3	0.0293	0.622397	0.3768	MQ	q	I
10	4104_ML_FinalNorm	AR-WT-0000DHT	A0MZ66	SHTN1	Shootin-1 (Shootin1)	0.77039	5.7E+07|5.7E+07|6.5E+07	1.79143e+08	5.97144e+07	3	1.9E+07|2.1E+07|2.1E+07	6.10273e+07	2.03424e+07	3	1	2.93546	0	MQ	q	I
11	4104_ML_FinalNorm	AR-WT-0060DHT	A0MZ66	SHTN1	Shootin-1 (Shootin1)	0.77039	2.5E+07|2.5E+07|2.6E+07	7.64768e+07	2.54923e+07	3	1.9E+07|2.1E+07|2.1E+07	6.10273e+07	2.03424e+07	3	0.1044	1.25316	0.2624	MQ	q	I
12	4104_ML_FinalNorm	AR-22Y-0000DHT	A1KXE4	FAM168B	Myelin-associated neurite-outgrowth inhibitor (Mani) (p20)	0	8.5E+06|8.6E+06|7.6E+06	2.47183e+07	8.23942e+06	3	8.5E+03|9.4E+03|1.1E+04	28372.2	9457.39	3	1	871.215	0	MQ	q	I
13	4104_ML_FinalNorm	AR-22Y-0060DHT	A1KXE4	FAM168B	Myelin-associated neurite-outgrowth inhibitor (Mani) (p20)	0	9.4E+06|7.2E+06|5.7E+06	2.23387e+07	7.44623e+06	3	8.5E+03|9.4E+03|1.1E+04	28372.2	9457.39	3	1	787.345	0	MQ	q	I
14	4104_ML_FinalNorm	AR-WT-0060DHT	A1KXE4	FAM168B	Myelin-associated neurite-outgrowth inhibitor (Mani) (p20)	0	1.7E+06|2.0E+06|1.5E+06	5.24382e+06	1.74794e+06	3	8.5E+03|9.4E+03|1.1E+04	28372.2	9457.39	3	1	184.823	0	MQ	q	I
15	4104_ML_FinalNorm	AR-WT-0000DHT	A1X283	SH3PXD2B	SH3 and PX domain-containing protein 2B (Adapter protein HOFI) (Factor for adipocyte differentiation 49) (Tyrosine kinase substrate with four SH3 domains)	0.537602	1.7E+06|2.2E+06|2.6E+06	6.55192e+06	2.18397e+06	3	9.2E+05|NAN|1.9E+06	2.80762e+06	1.40381e+06	3	0.3875	1.55574	0.1204	MQ	q	I
16	4104_ML_FinalNorm	AR-WT-0060DHT	A1X283	SH3PXD2B	SH3 and PX domain-containing protein 2B (Adapter protein HOFI) (Factor for adipocyte differentiation 49) (Tyrosine kinase substrate with four SH3 domains)	0.537602	NAN|2.1E+06|1.2E+06	3.26234e+06	1.63117e+06	3	9.2E+05|NAN|1.9E+06	2.80762e+06	1.40381e+06	3	0.1345	1.16196	0.2471	MQ	q	I
17	4104_ML_FinalNorm	AR-22Y-0000DHT	A2A2Z9	ANKRD18B	Ankyrin repeat domain-containing protein 18B	0	NAN|4.2E+07|4.0E+07	8.25422e+07	4.12711e+07	3	6.7E+03|9.3E+03|9.3E+03	25275.8	8425.25	3	0.6667	4898.5	0.0404	MQ	q	I
18	4104_ML_FinalNorm	AR-22Y-0060DHT	A2A2Z9	ANKRD18B	Ankyrin repeat domain-containing protein 18B	0	5.1E+07|4.4E+07|5.1E+07	1.4562e+08	4.85399e+07	3	6.7E+03|9.3E+03|9.3E+03	25275.8	8425.25	3	1	5761.24	0	MQ	q	I
19	4104_ML_FinalNorm	AR-WT-0000DHT	A2A2Z9	ANKRD18B	Ankyrin repeat domain-containing protein 18B	0	1.9E+06|1.5E+06|1.6E+06	4.98212e+06	1.66071e+06	3	6.7E+03|9.3E+03|9.3E+03	25275.8	8425.25	3	1	197.111	0	MQ	q	I
20	4104_ML_FinalNorm	AR-WT-0000DHT	A2RUS2	DENND3	DENN domain-containing protein 3	0.125442	1.1E+06|4.3E+06|9.1E+05	6.34746e+06	2.11582e+06	3	5.5E+05|2.9E+06|3.2E+06	6.61912e+06	2.20637e+06	3	0.1841	0.958959	0.2241	MQ	q	I
21	4104_ML_FinalNorm	AR-WT-0060DHT	A2RUS2	DENND3	DENN domain-containing protein 3	0.125442	2.8E+06|4.8E+05|1.8E+06	5.09621e+06	1.69874e+06	3	5.5E+05|2.9E+06|3.2E+06	6.61912e+06	2.20637e+06	3	0.1495	0.769923	0.2401	MQ	q	I
22	4104_ML_FinalNorm	AR-WT-0000DHT	A3KN83	SBNO1	Protein strawberry notch homolog 1 (Monocyte protein 3) (MOP-3)	0.687971	1.5E+07|6.8E+06|1.5E+07	3.63301e+07	1.211e+07	3	2.8E+06|3.3E+06|5.7E+06	1.18202e+07	3.94006e+06	3	0.7849	3.07357	0.0163	MQ	q	I
23	4104_ML_FinalNorm	AR-WT-0060DHT	A3KN83	SBNO1	Protein strawberry notch homolog 1 (Monocyte protein 3) (MOP-3)	0.687971	1.4E+07|1.2E+07|1.3E+07	3.91598e+07	1.30533e+07	3	2.8E+06|3.3E+06|5.7E+06	1.18202e+07	3.94006e+06	3	0.9839	3.31296	0.0008	MQ	q	I
24	4104_ML_FinalNorm	AR-22Y-0000DHT	A5YKK6	CNOT1	CCR4-NOT transcription complex subunit 1 (CCR4-associated factor 1) (Negative regulator of transcription subunit 1 homolog) (NOT1H) (hNOT1)	0.859023	NAN|1.2E+07|1.1E+07	2.25009e+07	1.12504e+07	3	2.0E+07|1.9E+07|2.5E+07	6.41884e+07	2.13961e+07	3	0.0072	0.525817	0.5233	MQ	q	I
25	4104_ML_FinalNorm	AR-22Y-0060DHT	A5YKK6	CNOT1	CCR4-NOT transcription complex subunit 1 (CCR4-associated factor 1) (Negative regulator of transcription subunit 1 homolog) (NOT1H) (hNOT1)	0.859023	NAN|NAN|1.1E+06	1.06276e+06	1.06276e+06	3	2.0E+07|1.9E+07|2.5E+07	6.41884e+07	2.13961e+07	3	0	0.0496709	0.6339	MQ	q	I
26	4104_ML_FinalNorm	AR-WT-0000DHT	A5YKK6	CNOT1	CCR4-NOT transcription complex subunit 1 (CCR4-associated factor 1) (Negative regulator of transcription subunit 1 homolog) (NOT1H) (hNOT1)	0.859023	1.4E+07|1.8E+07|1.8E+07	5.00787e+07	1.66929e+07	3	2.0E+07|1.9E+07|2.5E+07	6.41884e+07	2.13961e+07	3	0.0219	0.780183	0.4158	MQ	q	I
27	4104_ML_FinalNorm	AR-WT-0060DHT	A5YKK6	CNOT1	CCR4-NOT transcription complex subunit 1 (CCR4-associated factor 1) (Negative regulator of transcription subunit 1 homolog) (NOT1H) (hNOT1)	0.859023	1.1E+07|1.7E+07|1.4E+07	4.2405e+07	1.4135e+07	3	2.0E+07|1.9E+07|2.5E+07	6.41884e+07	2.13961e+07	3	0.0166	0.660633	0.4485	MQ	q	I
28	4104_ML_FinalNorm	AR-22Y-0000DHT	A6NHL2	TUBAL3	Tubulin alpha chain-like 3	0.972303	1.1E+07|NAN|NAN	1.11781e+07	1.11781e+07	3	6.6E+06|8.2E+06|9.8E+06	2.45909e+07	8.19696e+06	3	0.0609	1.36368	0.3032	MQ	q	I
29	4104_ML_FinalNorm	AR-22Y-0060DHT	A6NHL2	TUBAL3	Tubulin alpha chain-like 3	0.972303	1.0E+07|8.7E+06|NAN	1.87279e+07	9.36396e+06	3	6.6E+06|8.2E+06|9.8E+06	2.45909e+07	8.19696e+06	3	0.0409	1.14237	0.3387	MQ	q	I
30	4104_ML_FinalNorm	AR-WT-0000DHT	A6NHL2	TUBAL3	Tubulin alpha chain-like 3	0.972303	NAN|9.2E+06|9.0E+06	1.82574e+07	9.1287e+06	3	6.6E+06|8.2E+06|9.8E+06	2.45909e+07	8.19696e+06	3	0.0326	1.11367	0.3622	MQ	q	I
31	4104_ML_FinalNorm	AR-WT-0060DHT	A6NHL2	TUBAL3	Tubulin alpha chain-like 3	0.972303	3.7E+06|NAN|NAN	3.66984e+06	3.66984e+06	3	6.6E+06|8.2E+06|9.8E+06	2.45909e+07	8.19696e+06	3	0.0018	0.447707	0.5908	MQ	q	I
32	4104_ML_FinalNorm	AR-22Y-0000DHT	A6NHR9	SMCHD1	Structural maintenance of chromosomes flexible hinge domain-containing protein 1 (SMC hinge domain-containing protein 1) (EC 3.6.1.-)	0.868232	6.8E+06|1.3E+07|1.4E+07	3.39134e+07	1.13045e+07	3	2.7E+07|4.7E+07|3.7E+07	1.10462e+08	3.68208e+07	3	0.0258	0.307013	0.394	MQ	q	I
33	4104_ML_FinalNorm	AR-22Y-0060DHT	A6NHR9	SMCHD1	Structural maintenance of chromosomes flexible hinge domain-containing protein 1 (SMC hinge domain-containing protein 1) (EC 3.6.1.-)	0.868232	2.2E+07|2.7E+07|2.0E+07	6.8818e+07	2.29393e+07	3	2.7E+07|4.7E+07|3.7E+07	1.10462e+08	3.68208e+07	3	0.0462	0.622999	0.3276	MQ	q	I
34	4104_ML_FinalNorm	AR-WT-0000DHT	A6NHR9	SMCHD1	Structural maintenance of chromosomes flexible hinge domain-containing protein 1 (SMC hinge domain-containing protein 1) (EC 3.6.1.-)	0.868232	NAN|1.6E+07|1.0E+06	1.69396e+07	8.46978e+06	3	2.7E+07|4.7E+07|3.7E+07	1.10462e+08	3.68208e+07	3	0.0121	0.230027	0.4822	MQ	q	I
35	4104_ML_FinalNorm	AR-WT-0060DHT	A6NHR9	SMCHD1	Structural maintenance of chromosomes flexible hinge domain-containing protein 1 (SMC hinge domain-containing protein 1) (EC 3.6.1.-)	0.868232	5.0E+05|NAN|NAN	501465	501465	3	2.7E+07|4.7E+07|3.7E+07	1.10462e+08	3.68208e+07	3	0.0001	0.0136191	0.6286	MQ	q	I
36	4104_ML_FinalNorm	AR-22Y-0000DHT	A6NKT7	RGPD3	RanBP2-like and GRIP domain-containing protein 3	0.924266	NAN|4.7E+06|4.2E+06	8.86395e+06	4.43198e+06	3	9.5E+06|NAN|NAN	9.537e+06	9.537e+06	3	0.0038	0.464714	0.5602	MQ	q	I
37	4104_ML_FinalNorm	AR-22Y-0060DHT	A6NKT7	RGPD3	RanBP2-like and GRIP domain-containing protein 3	0.924266	2.8E+06|NAN|NAN	2.80147e+06	2.80147e+06	3	9.5E+06|NAN|NAN	9.537e+06	9.537e+06	3	0.0005	0.293747	0.6148	MQ	q	I
38	4104_ML_FinalNorm	AR-WT-0060DHT	A6NKT7	RGPD3	RanBP2-like and GRIP domain-containing protein 3	0.924266	1.2E+07|1.3E+07|1.1E+07	3.57097e+07	1.19032e+07	3	9.5E+06|NAN|NAN	9.537e+06	9.537e+06	3	0.2415	1.24811	0.2029	MQ	q	I
39	4104_ML_FinalNorm	AR-22Y-0000DHT	A7E2V4	ZSWIM8	Zinc finger SWIM domain-containing protein 8	0.468186	NAN|1.5E+06|NAN	1.51034e+06	1.51034e+06	3	3.7E+05|NAN|NAN	372050	372050	3	0.3333	4.0595	0.1476	MQ	q	I
40	4104_ML_FinalNorm	AR-WT-0000DHT	A7E2V4	ZSWIM8	Zinc finger SWIM domain-containing protein 8	0.468186	2.1E+06|6.2E+05|1.1E+06	3.86444e+06	1.28815e+06	3	3.7E+05|NAN|NAN	372050	372050	3	0.9958	3.4623	0.0002	MQ	q	I
41	4104_ML_FinalNorm	AR-WT-0060DHT	A7E2V4	ZSWIM8	Zinc finger SWIM domain-containing protein 8	0.468186	8.8E+05|1.1E+06|9.9E+05	2.97441e+06	991471	3	3.7E+05|NAN|NAN	372050	372050	3	1	2.66489	0	MQ	q	I
42	4104_ML_FinalNorm	AR-22Y-0000DHT	A8CG34	POM121C	Nuclear envelope pore membrane protein POM 121C (Nuclear pore membrane protein 121-2) (POM121-2) (Pore membrane protein of 121 kDa C)	0.730257	3.6E+06|6.6E+06|7.7E+06	1.78543e+07	5.95142e+06	3	3.0E+06|2.2E+06|2.8E+06	8.07621e+06	2.69207e+06	3	0.7307	2.21072	0.0226	MQ	q	I
43	4104_ML_FinalNorm	AR-22Y-0060DHT	A8CG34	POM121C	Nuclear envelope pore membrane protein POM 121C (Nuclear pore membrane protein 121-2) (POM121-2) (Pore membrane protein of 121 kDa C)	0.730257	4.5E+06|4.9E+06|8.2E+06	1.76364e+07	5.87881e+06	3	3.0E+06|2.2E+06|2.8E+06	8.07621e+06	2.69207e+06	3	0.9809	2.18375	0.0009	MQ	q	I
44	4104_ML_FinalNorm	AR-WT-0000DHT	A8CG34	POM121C	Nuclear envelope pore membrane protein POM 121C (Nuclear pore membrane protein 121-2) (POM121-2) (Pore membrane protein of 121 kDa C)	0.730257	2.1E+06|2.4E+06|1.8E+06	6.3221e+06	2.10737e+06	3	3.0E+06|2.2E+06|2.8E+06	8.07621e+06	2.69207e+06	3	0.017	0.782806	0.4457	MQ	q	I
45	4104_ML_FinalNorm	AR-WT-0060DHT	A8CG34	POM121C	Nuclear envelope pore membrane protein POM 121C (Nuclear pore membrane protein 121-2) (POM121-2) (Pore membrane protein of 121 kDa C)	0.730257	1.7E+06|1.3E+06|2.0E+06	5.00714e+06	1.66905e+06	3	3.0E+06|2.2E+06|2.8E+06	8.07621e+06	2.69207e+06	3	0.0102	0.619986	0.4962	MQ	q	I
46	4104_ML_FinalNorm	AR-22Y-0060DHT	C9JLW8	MCRIP1	Mapk-regulated corepressor-interacting protein 1 (Granulin-2) (Protein FAM195B)	0	1.2E+07|1.4E+07|1.7E+07	4.21361e+07	1.40454e+07	3	3.3E+06|3.1E+06|2.7E+06	9.11053e+06	3.03684e+06	3	1	4.625	0	MQ	q	I
47	4104_ML_FinalNorm	AR-WT-0000DHT	C9JLW8	MCRIP1	Mapk-regulated corepressor-interacting protein 1 (Granulin-2) (Protein FAM195B)	0	1.6E+06|9.2E+05|7.3E+05	3.23954e+06	1.07985e+06	3	3.3E+06|3.1E+06|2.7E+06	9.11053e+06	3.03684e+06	3	0.016	0.355582	0.4532	MQ	q	I
48	4104_ML_FinalNorm	AR-22Y-0000DHT	E9PAV3	NACA	Nascent polypeptide-associated complex subunit alpha, muscle-specific form (Alpha-NAC, muscle-specific form) (skNAC)	0	9.6E+06|1.3E+07|1.0E+07	3.3211e+07	1.10703e+07	3	2.7E+07|2.4E+07|1.9E+07	7.01825e+07	2.33942e+07	3	0.0066	0.473209	0.5292	MQ	q	I
49	4104_ML_FinalNorm	AR-22Y-0060DHT	E9PAV3	NACA	Nascent polypeptide-associated complex subunit alpha, muscle-specific form (Alpha-NAC, muscle-specific form) (skNAC)	0	5.4E+06|6.5E+06|1.0E+07	2.24078e+07	7.46927e+06	3	2.7E+07|2.4E+07|1.9E+07	7.01825e+07	2.33942e+07	3	0.0024	0.319279	0.5812	MQ	q	I
50	4104_ML_FinalNorm	AR-WT-0000DHT	E9PAV3	NACA	Nascent polypeptide-associated complex subunit alpha, muscle-specific form (Alpha-NAC, muscle-specific form) (skNAC)	0	8.6E+06|1.5E+07|6.3E+06	2.98817e+07	9.96056e+06	3	2.7E+07|2.4E+07|1.9E+07	7.01825e+07	2.33942e+07	3	0.0059	0.425771	0.536	MQ	q	I
51	4104_ML_FinalNorm	AR-WT-0060DHT	E9PAV3	NACA	Nascent polypeptide-associated complex subunit alpha, muscle-specific form (Alpha-NAC, muscle-specific form) (skNAC)	0	1.3E+07|5.7E+06|9.0E+06	2.77132e+07	9.23772e+06	3	2.7E+07|2.4E+07|1.9E+07	7.01825e+07	2.33942e+07	3	0.0047	0.394873	0.5497	MQ	q	I
52	4104_ML_FinalNorm	AR-22Y-0000DHT	E9PRG8	C11orf98	Uncharacterized protein C11orf98	0	2.9E+06|2.0E+06|3.6E+06	8.48642e+06	2.82881e+06	3	1.5E+06|1.6E+06|1.5E+06	4.66318e+06	1.55439e+06	3	0.7024	1.81988	0.0288	MQ	q	I
53	4104_ML_FinalNorm	AR-22Y-0060DHT	E9PRG8	C11orf98	Uncharacterized protein C11orf98	0	4.4E+06|4.8E+06|5.7E+06	1.48969e+07	4.96562e+06	3	1.5E+06|1.6E+06|1.5E+06	4.66318e+06	1.55439e+06	3	1	3.19457	0	MQ	q	I
54	4104_ML_FinalNorm	AR-WT-0000DHT	E9PRG8	C11orf98	Uncharacterized protein C11orf98	0	1.4E+06|1.4E+06|1.5E+06	4.28163e+06	1.42721e+06	3	1.5E+06|1.6E+06|1.5E+06	4.66318e+06	1.55439e+06	3	0.0228	0.918178	0.4109	MQ	q	I
55	4104_ML_FinalNorm	AR-WT-0060DHT	E9PRG8	C11orf98	Uncharacterized protein C11orf98	0	7.5E+05|9.6E+05|1.0E+06	2.72491e+06	908303	3	1.5E+06|1.6E+06|1.5E+06	4.66318e+06	1.55439e+06	3	0.0087	0.584346	0.5083	MQ	q	I
56	4104_ML_FinalNorm	AR-22Y-0000DHT	O00116	AGPS	Alkyldihydroxyacetonephosphate synthase, peroxisomal (Alkyl-DHAP synthase) (EC 2.5.1.26) (Aging-associated gene 5 protein) (Alkylglycerone-phosphate synthase)	0.654694	3.7E+06|4.0E+06|5.5E+06	1.32698e+07	4.42328e+06	3	7.4E+03|6.4E+03|8.9E+03	22647.6	7549.21	3	1	585.926	0	MQ	q	I
57	4104_ML_FinalNorm	AR-22Y-0060DHT	O00116	AGPS	Alkyldihydroxyacetonephosphate synthase, peroxisomal (Alkyl-DHAP synthase) (EC 2.5.1.26) (Aging-associated gene 5 protein) (Alkylglycerone-phosphate synthase)	0.654694	NAN|NAN|2.6E+06	2.56143e+06	2.56143e+06	3	7.4E+03|6.4E+03|8.9E+03	22647.6	7549.21	3	0.3333	339.298	0.1476	MQ	q	I
58	4104_ML_FinalNorm	AR-22Y-0000DHT	O00148	DDX39A	ATP-dependent RNA helicase DDX39A (EC 3.6.4.13) (DEAD box protein 39) (Nuclear RNA helicase URH49)	0.952173	NAN|2.0E+06|NAN	1.97914e+06	1.97914e+06	3	3.9E+06|3.7E+06|3.7E+06	1.12825e+07	3.76083e+06	3	0.0022	0.526251	0.5847	MQ	q	I
59	4104_ML_FinalNorm	AR-22Y-0060DHT	O00148	DDX39A	ATP-dependent RNA helicase DDX39A (EC 3.6.4.13) (DEAD box protein 39) (Nuclear RNA helicase URH49)	0.952173	NAN|NAN|3.4E+06	3.37759e+06	3.37759e+06	3	3.9E+06|3.7E+06|3.7E+06	1.12825e+07	3.76083e+06	3	0.0073	0.898097	0.5222	MQ	q	I
60	4104_ML_FinalNorm	AR-WT-0000DHT	O00148	DDX39A	ATP-dependent RNA helicase DDX39A (EC 3.6.4.13) (DEAD box protein 39) (Nuclear RNA helicase URH49)	0.952173	3.5E+06|3.6E+06|2.6E+06	9.77237e+06	3.25746e+06	3	3.9E+06|3.7E+06|3.7E+06	1.12825e+07	3.76083e+06	3	0.0205	0.866155	0.4238	MQ	q	I
61	4104_ML_FinalNorm	AR-WT-0060DHT	O00148	DDX39A	ATP-dependent RNA helicase DDX39A (EC 3.6.4.13) (DEAD box protein 39) (Nuclear RNA helicase URH49)	0.952173	1.2E+06|2.0E+06|1.3E+06	4.46116e+06	1.48705e+06	3	3.9E+06|3.7E+06|3.7E+06	1.12825e+07	3.76083e+06	3	0.0033	0.395406	0.566	MQ	q	I
62	4104_ML_FinalNorm	AR-22Y-0000DHT	O00151	PDLIM1	PDZ and LIM domain protein 1 (C-terminal LIM domain protein 1) (Elfin) (LIM domain protein CLP-36)	0.838251	9.4E+06|6.4E+06|1.4E+07	3.02712e+07	1.00904e+07	3	1.2E+08|1.3E+08|1.1E+08	3.6567e+08	1.2189e+08	3	0.0081	0.082783	0.5147	MQ	q	I
63	4104_ML_FinalNorm	AR-22Y-0060DHT	O00151	PDLIM1	PDZ and LIM domain protein 1 (C-terminal LIM domain protein 1) (Elfin) (LIM domain protein CLP-36)	0.838251	2.9E+06|3.0E+06|6.6E+06	1.25407e+07	4.18023e+06	3	1.2E+08|1.3E+08|1.1E+08	3.6567e+08	1.2189e+08	3	0.0038	0.0342951	0.5602	MQ	q	I
64	4104_ML_FinalNorm	AR-WT-0000DHT	O00151	PDLIM1	PDZ and LIM domain protein 1 (C-terminal LIM domain protein 1) (Elfin) (LIM domain protein CLP-36)	0.838251	2.4E+08|2.8E+08|2.7E+08	7.99063e+08	2.66354e+08	3	1.2E+08|1.3E+08|1.1E+08	3.6567e+08	1.2189e+08	3	0.9996	2.18521	0	MQ	q	I
65	4104_ML_FinalNorm	AR-WT-0060DHT	O00151	PDLIM1	PDZ and LIM domain protein 1 (C-terminal LIM domain protein 1) (Elfin) (LIM domain protein CLP-36)	0.838251	1.9E+08|2.0E+08|1.9E+08	5.80531e+08	1.9351e+08	3	1.2E+08|1.3E+08|1.1E+08	3.6567e+08	1.2189e+08	3	0.7305	1.58758	0.0227	MQ	q	I
66	4104_ML_FinalNorm	AR-22Y-0000DHT	O00154	ACOT7	Cytosolic acyl coenzyme A thioester hydrolase (EC 3.1.2.2) (Acyl-CoA thioesterase 7) (Brain acyl-CoA hydrolase) (BACH) (hBACH) (CTE-IIa) (CTE-II) (Long chain acyl-CoA thioester hydrolase)	0.78585	2.1E+08|1.9E+08|1.9E+08	5.80265e+08	1.93422e+08	3	2.1E+07|2.2E+07|1.4E+07	5.73162e+07	1.91054e+07	3	1	10.1239	0	MQ	q	I
67	4104_ML_FinalNorm	AR-22Y-0060DHT	O00154	ACOT7	Cytosolic acyl coenzyme A thioester hydrolase (EC 3.1.2.2) (Acyl-CoA thioesterase 7) (Brain acyl-CoA hydrolase) (BACH) (hBACH) (CTE-IIa) (CTE-II) (Long chain acyl-CoA thioester hydrolase)	0.78585	8.1E+07|9.8E+07|9.5E+07	2.7432e+08	9.144e+07	3	2.1E+07|2.2E+07|1.4E+07	5.73162e+07	1.91054e+07	3	1	4.78608	0	MQ	q	I
68	4104_ML_FinalNorm	AR-WT-0000DHT	O00154	ACOT7	Cytosolic acyl coenzyme A thioester hydrolase (EC 3.1.2.2) (Acyl-CoA thioesterase 7) (Brain acyl-CoA hydrolase) (BACH) (hBACH) (CTE-IIa) (CTE-II) (Long chain acyl-CoA thioester hydrolase)	0.78585	3.2E+06|4.8E+06|5.5E+06	1.34904e+07	4.4968e+06	3	2.1E+07|2.2E+07|1.4E+07	5.73162e+07	1.91054e+07	3	0.0235	0.235368	0.4055	MQ	q	I
69	4104_ML_FinalNorm	AR-WT-0060DHT	O00154	ACOT7	Cytosolic acyl coenzyme A thioester hydrolase (EC 3.1.2.2) (Acyl-CoA thioesterase 7) (Brain acyl-CoA hydrolase) (BACH) (hBACH) (CTE-IIa) (CTE-II) (Long chain acyl-CoA thioester hydrolase)	0.78585	8.0E+06|6.7E+06|8.2E+06	2.29022e+07	7.63405e+06	3	2.1E+07|2.2E+07|1.4E+07	5.73162e+07	1.91054e+07	3	0.0337	0.399575	0.3579	MQ	q	I
70	4104_ML_FinalNorm	AR-22Y-0000DHT	O00159	MYO1C	Unconventional myosin-Ic (Myosin I beta) (MMI-beta) (MMIb)	0.92563	1.7E+06|2.6E+06|8.4E+06	1.26778e+07	4.22593e+06	3	6.6E+06|7.5E+06|9.5E+06	2.35857e+07	7.86191e+06	3	0.0223	0.53752	0.4133	MQ	q	I
71	4104_ML_FinalNorm	AR-22Y-0060DHT	O00159	MYO1C	Unconventional myosin-Ic (Myosin I beta) (MMI-beta) (MMIb)	0.92563	1.7E+06|1.9E+06|2.8E+06	6.42774e+06	2.14258e+06	3	6.6E+06|7.5E+06|9.5E+06	2.35857e+07	7.86191e+06	3	0.01	0.272527	0.4976	MQ	q	I
72	4104_ML_FinalNorm	AR-WT-0000DHT	O00159	MYO1C	Unconventional myosin-Ic (Myosin I beta) (MMI-beta) (MMIb)	0.92563	NAN|3.5E+05|3.1E+05	666117	333058	3	6.6E+06|7.5E+06|9.5E+06	2.35857e+07	7.86191e+06	3	0.0002	0.0423635	0.6234	MQ	q	I
73	4104_ML_FinalNorm	AR-WT-0060DHT	O00159	MYO1C	Unconventional myosin-Ic (Myosin I beta) (MMI-beta) (MMIb)	0.92563	2.5E+05|NAN|3.9E+05	641158	320579	3	6.6E+06|7.5E+06|9.5E+06	2.35857e+07	7.86191e+06	3	0.0002	0.0407762	0.6234	MQ	q	I
74	4104_ML_FinalNorm	AR-22Y-0000DHT	O00165	HAX1	HCLS1-associated protein X-1 (HS1-associating protein X-1) (HAX-1) (HS1-binding protein 1) (HSP1BP-1)	0.781408	2.6E+07|2.3E+07|3.4E+07	8.23228e+07	2.74409e+07	3	5.4E+06|6.3E+06|3.9E+06	1.55006e+07	5.16687e+06	3	1	5.31094	0	MQ	q	I
75	4104_ML_FinalNorm	AR-22Y-0060DHT	O00165	HAX1	HCLS1-associated protein X-1 (HS1-associating protein X-1) (HAX-1) (HS1-binding protein 1) (HSP1BP-1)	0.781408	7.3E+07|9.3E+07|8.4E+07	2.50823e+08	8.36078e+07	3	5.4E+06|6.3E+06|3.9E+06	1.55006e+07	5.16687e+06	3	1	16.1815	0	MQ	q	I
76	4104_ML_FinalNorm	AR-WT-0000DHT	O00165	HAX1	HCLS1-associated protein X-1 (HS1-associating protein X-1) (HAX-1) (HS1-binding protein 1) (HSP1BP-1)	0.781408	NAN|2.5E+06|NAN	2.54963e+06	2.54963e+06	3	5.4E+06|6.3E+06|3.9E+06	1.55006e+07	5.16687e+06	3	0.0109	0.493457	0.4915	MQ	q	I
77	4104_ML_FinalNorm	AR-WT-0060DHT	O00165	HAX1	HCLS1-associated protein X-1 (HS1-associating protein X-1) (HAX-1) (HS1-binding protein 1) (HSP1BP-1)	0.781408	2.0E+06|NAN|NAN	2.03363e+06	2.03363e+06	3	5.4E+06|6.3E+06|3.9E+06	1.55006e+07	5.16687e+06	3	0.0092	0.39359	0.505	MQ	q	I
78	4104_ML_FinalNorm	AR-22Y-0000DHT	O00170	AIP	AH receptor-interacting protein (AIP) (Aryl-hydrocarbon receptor-interacting protein) (HBV X-associated protein 2) (XAP-2) (Immunophilin homolog ARA9)	0.679399	NAN|1.2E+07|9.0E+06	2.05524e+07	1.02762e+07	3	6.1E+06|4.3E+06|3.9E+06	1.43944e+07	4.79813e+06	3	0.6043	2.14171	0.0752	MQ	q	I
79	4104_ML_FinalNorm	AR-22Y-0060DHT	O00170	AIP	AH receptor-interacting protein (AIP) (Aryl-hydrocarbon receptor-interacting protein) (HBV X-associated protein 2) (XAP-2) (Immunophilin homolog ARA9)	0.679399	1.5E+07|1.4E+07|1.2E+07	4.12402e+07	1.37467e+07	3	6.1E+06|4.3E+06|3.9E+06	1.43944e+07	4.79813e+06	3	0.9984	2.86501	0.0001	MQ	q	I
80	4104_ML_FinalNorm	AR-WT-0000DHT	O00170	AIP	AH receptor-interacting protein (AIP) (Aryl-hydrocarbon receptor-interacting protein) (HBV X-associated protein 2) (XAP-2) (Immunophilin homolog ARA9)	0.679399	4.4E+07|4.1E+07|4.5E+07	1.2981e+08	4.32701e+07	3	6.1E+06|4.3E+06|3.9E+06	1.43944e+07	4.79813e+06	3	1	9.01812	0	MQ	q	I
81	4104_ML_FinalNorm	AR-WT-0060DHT	O00170	AIP	AH receptor-interacting protein (AIP) (Aryl-hydrocarbon receptor-interacting protein) (HBV X-associated protein 2) (XAP-2) (Immunophilin homolog ARA9)	0.679399	3.1E+07|3.6E+07|3.0E+07	9.7447e+07	3.24823e+07	3	6.1E+06|4.3E+06|3.9E+06	1.43944e+07	4.79813e+06	3	1	6.76979	0	MQ	q	I
82	4104_ML_FinalNorm	AR-22Y-0000DHT	O00193	SMAP	Small acidic protein	0.781408	NAN|5.6E+06|NAN	5.56113e+06	5.56113e+06	3	1.8E+07|1.3E+07|5.3E+06	3.5972e+07	1.19907e+07	3	0.0083	0.463787	0.5126	MQ	q	I
83	4104_ML_FinalNorm	AR-22Y-0060DHT	O00193	SMAP	Small acidic protein	0.781408	NAN|4.3E+06|4.3E+06	8.55267e+06	4.27634e+06	3	1.8E+07|1.3E+07|5.3E+06	3.5972e+07	1.19907e+07	3	0.008	0.356638	0.515	MQ	q	I
84	4104_ML_FinalNorm	AR-WT-0000DHT	O00193	SMAP	Small acidic protein	0.781408	1.1E+07|3.9E+06|1.0E+07	2.50258e+07	8.34194e+06	3	1.8E+07|1.3E+07|5.3E+06	3.5972e+07	1.19907e+07	3	0.0677	0.695702	0.2957	MQ	q	I
85	4104_ML_FinalNorm	AR-WT-0060DHT	O00193	SMAP	Small acidic protein	0.781408	1.6E+07|1.3E+07|1.4E+07	4.3223e+07	1.44077e+07	3	1.8E+07|1.3E+07|5.3E+06	3.5972e+07	1.19907e+07	3	0.1674	1.20157	0.2311	MQ	q	I
86	4104_ML_FinalNorm	AR-22Y-0000DHT	O00203	AP3B1	AP-3 complex subunit beta-1 (Adaptor protein complex AP-3 subunit beta-1) (Adaptor-related protein complex 3 subunit beta-1) (Beta-3A-adaptin) (Clathrin assembly protein complex 3 beta-1 large chain)	0.832249	NAN|3.4E+06|3.7E+06	7.11433e+06	3.55717e+06	3	4.0E+07|4.0E+07|3.4E+07	1.1366e+08	3.78868e+07	3	0.0006	0.0938894	0.6122	MQ	q	I
87	4104_ML_FinalNorm	AR-22Y-0060DHT	O00203	AP3B1	AP-3 complex subunit beta-1 (Adaptor protein complex AP-3 subunit beta-1) (Adaptor-related protein complex 3 subunit beta-1) (Beta-3A-adaptin) (Clathrin assembly protein complex 3 beta-1 large chain)	0.832249	NAN|NAN|1.1E+06	1.10057e+06	1.10057e+06	3	4.0E+07|4.0E+07|3.4E+07	1.1366e+08	3.78868e+07	3	0	0.0290489	0.6339	MQ	q	I
88	4104_ML_FinalNorm	AR-WT-0000DHT	O00203	AP3B1	AP-3 complex subunit beta-1 (Adaptor protein complex AP-3 subunit beta-1) (Adaptor-related protein complex 3 subunit beta-1) (Beta-3A-adaptin) (Clathrin assembly protein complex 3 beta-1 large chain)	0.832249	2.6E+07|2.8E+07|2.4E+07	7.77929e+07	2.5931e+07	3	4.0E+07|4.0E+07|3.4E+07	1.1366e+08	3.78868e+07	3	0.0247	0.684433	0.3999	MQ	q	I
89	4104_ML_FinalNorm	AR-WT-0060DHT	O00203	AP3B1	AP-3 complex subunit beta-1 (Adaptor protein complex AP-3 subunit beta-1) (Adaptor-related protein complex 3 subunit beta-1) (Beta-3A-adaptin) (Clathrin assembly protein complex 3 beta-1 large chain)	0.832249	1.5E+07|1.3E+07|1.7E+07	4.51593e+07	1.50531e+07	3	4.0E+07|4.0E+07|3.4E+07	1.1366e+08	3.78868e+07	3	0.0128	0.397318	0.4767	MQ	q	I
90	4104_ML_FinalNorm	AR-WT-0000DHT	O00213	APBB1	Amyloid beta precursor protein binding family B member 1 (Amyloid-beta A4 precursor protein-binding family B member 1) (Protein Fe65)	0.584656	4.3E+07|4.0E+07|5.3E+07	1.35657e+08	4.52191e+07	3	4.7E+06|3.6E+06|4.5E+06	1.28163e+07	4.27209e+06	3	1	10.5848	0	MQ	q	I
91	4104_ML_FinalNorm	AR-WT-0060DHT	O00213	APBB1	Amyloid beta precursor protein binding family B member 1 (Amyloid-beta A4 precursor protein-binding family B member 1) (Protein Fe65)	0.584656	3.4E+07|3.4E+07|4.9E+07	1.17369e+08	3.91229e+07	3	4.7E+06|3.6E+06|4.5E+06	1.28163e+07	4.27209e+06	3	1	9.15778	0	MQ	q	I
92	4104_ML_FinalNorm	AR-22Y-0000DHT	O00217	NDUFS8	NADH dehydrogenase [ubiquinone] iron-sulfur protein 8, mitochondrial (EC 7.1.1.2) (Complex I-23kD) (CI-23kD) (NADH-ubiquinone oxidoreductase 23 kDa subunit) (TYKY subunit)	0.557955	2.7E+06|2.2E+06|2.1E+06	7.01306e+06	2.33769e+06	3	1.4E+06|NAN|NAN	1.35261e+06	1.35261e+06	3	0.9574	1.72828	0.0023	MQ	q	I
93	4104_ML_FinalNorm	AR-22Y-0060DHT	O00217	NDUFS8	NADH dehydrogenase [ubiquinone] iron-sulfur protein 8, mitochondrial (EC 7.1.1.2) (Complex I-23kD) (CI-23kD) (NADH-ubiquinone oxidoreductase 23 kDa subunit) (TYKY subunit)	0.557955	2.8E+06|3.3E+06|3.2E+06	9.30757e+06	3.10252e+06	3	1.4E+06|NAN|NAN	1.35261e+06	1.35261e+06	3	1	2.29373	0	MQ	q	I
94	4104_ML_FinalNorm	AR-WT-0000DHT	O00217	NDUFS8	NADH dehydrogenase [ubiquinone] iron-sulfur protein 8, mitochondrial (EC 7.1.1.2) (Complex I-23kD) (CI-23kD) (NADH-ubiquinone oxidoreductase 23 kDa subunit) (TYKY subunit)	0.557955	1.1E+06|9.8E+05|NAN	2.04147e+06	1.02074e+06	3	1.4E+06|NAN|NAN	1.35261e+06	1.35261e+06	3	0.0118	0.754642	0.4844	MQ	q	I
95	4104_ML_FinalNorm	AR-WT-0060DHT	O00217	NDUFS8	NADH dehydrogenase [ubiquinone] iron-sulfur protein 8, mitochondrial (EC 7.1.1.2) (Complex I-23kD) (CI-23kD) (NADH-ubiquinone oxidoreductase 23 kDa subunit) (TYKY subunit)	0.557955	1.1E+06|1.4E+06|1.9E+06	4.4609e+06	1.48697e+06	3	1.4E+06|NAN|NAN	1.35261e+06	1.35261e+06	3	0.2616	1.09933	0.1955	MQ	q	I
96	4104_ML_FinalNorm	AR-22Y-0000DHT	O00231	PSMD11	26S proteasome non-ATPase regulatory subunit 11 (26S proteasome regulatory subunit RPN6) (26S proteasome regulatory subunit S9) (26S proteasome regulatory subunit p44.5)	0.933262	2.5E+06|3.1E+06|1.3E+06	6.88427e+06	2.29476e+06	3	4.2E+06|3.7E+06|4.8E+06	1.27012e+07	4.23375e+06	3	0.0082	0.542015	0.5137	MQ	q	I
97	4104_ML_FinalNorm	AR-22Y-0060DHT	O00231	PSMD11	26S proteasome non-ATPase regulatory subunit 11 (26S proteasome regulatory subunit RPN6) (26S proteasome regulatory subunit S9) (26S proteasome regulatory subunit p44.5)	0.933262	1.7E+06|NAN|NAN	1.74451e+06	1.74451e+06	3	4.2E+06|3.7E+06|4.8E+06	1.27012e+07	4.23375e+06	3	0.0011	0.412047	0.6013	MQ	q	I
98	4104_ML_FinalNorm	AR-WT-0000DHT	O00231	PSMD11	26S proteasome non-ATPase regulatory subunit 11 (26S proteasome regulatory subunit RPN6) (26S proteasome regulatory subunit S9) (26S proteasome regulatory subunit p44.5)	0.933262	9.9E+05|2.1E+06|1.6E+06	4.65635e+06	1.55212e+06	3	4.2E+06|3.7E+06|4.8E+06	1.27012e+07	4.23375e+06	3	0.0028	0.366606	0.5734	MQ	q	I
99	4104_ML_FinalNorm	AR-WT-0060DHT	O00231	PSMD11	26S proteasome non-ATPase regulatory subunit 11 (26S proteasome regulatory subunit RPN6) (26S proteasome regulatory subunit S9) (26S proteasome regulatory subunit p44.5)	0.933262	NAN|2.6E+06|8.9E+05	3.48498e+06	1.74249e+06	3	4.2E+06|3.7E+06|4.8E+06	1.27012e+07	4.23375e+06	3	0.0033	0.411571	0.566	MQ	q	I
100	4104_ML_FinalNorm	AR-22Y-0000DHT	O00232	PSMD12	26S proteasome non-ATPase regulatory subunit 12 (26S proteasome regulatory subunit RPN5) (26S proteasome regulatory subunit p55)	0.921854	NAN|NAN|4.0E+06	3.97483e+06	3.97483e+06	3	6.7E+06|6.4E+06|5.9E+06	1.90028e+07	6.33425e+06	3	0.0034	0.627514	0.5648	MQ	q	I
101	4104_ML_FinalNorm	AR-22Y-0060DHT	O00232	PSMD12	26S proteasome non-ATPase regulatory subunit 12 (26S proteasome regulatory subunit RPN5) (26S proteasome regulatory subunit p55)	0.921854	NAN|NAN|1.5E+06	1.47895e+06	1.47895e+06	3	6.7E+06|6.4E+06|5.9E+06	1.90028e+07	6.33425e+06	3	0.0002	0.233484	0.6234	MQ	q	I
102	4104_ML_FinalNorm	AR-WT-0000DHT	O00232	PSMD12	26S proteasome non-ATPase regulatory subunit 12 (26S proteasome regulatory subunit RPN5) (26S proteasome regulatory subunit p55)	0.921854	3.7E+06|5.2E+06|4.7E+06	1.3519e+07	4.50634e+06	3	6.7E+06|6.4E+06|5.9E+06	1.90028e+07	6.33425e+06	3	0.0137	0.711424	0.4701	MQ	q	I
103	4104_ML_FinalNorm	AR-WT-0060DHT	O00232	PSMD12	26S proteasome non-ATPase regulatory subunit 12 (26S proteasome regulatory subunit RPN5) (26S proteasome regulatory subunit p55)	0.921854	4.3E+06|6.5E+06|2.7E+06	1.34575e+07	4.48584e+06	3	6.7E+06|6.4E+06|5.9E+06	1.90028e+07	6.33425e+06	3	0.0145	0.708187	0.4638	MQ	q	I
104	4104_ML_FinalNorm	AR-WT-0000DHT	O00267	SUPT5H	Transcription elongation factor SPT5 (hSPT5) (DRB sensitivity-inducing factor 160 kDa subunit) (DSIF p160) (DRB sensitivity-inducing factor large subunit) (DSIF large subunit) (Tat-cotransactivator 1 protein) (Tat-CT1 protein)	0.88424	NAN|NAN|4.4E+05	441562	441562	3	3.0E+06|NAN|NAN	2.95947e+06	2.95947e+06	3	0	0.149203	0.6339	MQ	q	I
105	4104_ML_FinalNorm	AR-22Y-0000DHT	O00268	TAF4	Transcription initiation factor TFIID subunit 4 (RNA polymerase II TBP-associated factor subunit C) (TBP-associated factor 4) (Transcription initiation factor TFIID 130 kDa subunit) (TAF(II)130) (TAFII-130) (TAFII130) (Transcription initiation factor TFIID 135 kDa subunit) (TAF(II)135) (TAFII-135) (TAFII135)	0.885989	5.1E+07|7.3E+07|7.6E+07	2.00703e+08	6.6901e+07	3	8.6E+06|8.1E+06|9.7E+06	2.63232e+07	8.77441e+06	3	1	7.62456	0	MQ	q	I
106	4104_ML_FinalNorm	AR-22Y-0060DHT	O00268	TAF4	Transcription initiation factor TFIID subunit 4 (RNA polymerase II TBP-associated factor subunit C) (TBP-associated factor 4) (Transcription initiation factor TFIID 130 kDa subunit) (TAF(II)130) (TAFII-130) (TAFII130) (Transcription initiation factor TFIID 135 kDa subunit) (TAF(II)135) (TAFII-135) (TAFII135)	0.885989	8.7E+07|1.1E+08|1.2E+08	3.2022e+08	1.0674e+08	3	8.6E+06|8.1E+06|9.7E+06	2.63232e+07	8.77441e+06	3	1	12.1649	0	MQ	q	I
107	4104_ML_FinalNorm	AR-WT-0000DHT	O00268	TAF4	Transcription initiation factor TFIID subunit 4 (RNA polymerase II TBP-associated factor subunit C) (TBP-associated factor 4) (Transcription initiation factor TFIID 130 kDa subunit) (TAF(II)130) (TAFII-130) (TAFII130) (Transcription initiation factor TFIID 135 kDa subunit) (TAF(II)135) (TAFII-135) (TAFII135)	0.885989	4.6E+06|7.5E+06|7.3E+06	1.93195e+07	6.43985e+06	3	8.6E+06|8.1E+06|9.7E+06	2.63232e+07	8.77441e+06	3	0.0275	0.733936	0.385	MQ	q	I
108	4104_ML_FinalNorm	AR-WT-0060DHT	O00268	TAF4	Transcription initiation factor TFIID subunit 4 (RNA polymerase II TBP-associated factor subunit C) (TBP-associated factor 4) (Transcription initiation factor TFIID 130 kDa subunit) (TAF(II)130) (TAFII-130) (TAFII130) (Transcription initiation factor TFIID 135 kDa subunit) (TAF(II)135) (TAFII-135) (TAFII135)	0.885989	1.4E+07|1.6E+07|1.1E+07	4.07328e+07	1.35776e+07	3	8.6E+06|8.1E+06|9.7E+06	2.63232e+07	8.77441e+06	3	0.6339	1.54741	0.0694	MQ	q	I
109	4104_ML_FinalNorm	AR-22Y-0000DHT	O00299	CLIC1	Chloride intracellular channel protein 1 (Chloride channel ABP) (Nuclear chloride ion channel 27) (NCC27) (Regulatory nuclear chloride ion channel protein) (hRNCC)	0.861486	3.8E+06|9.6E+06|1.1E+07	2.48027e+07	8.26756e+06	3	8.8E+06|5.3E+06|7.6E+06	2.17703e+07	7.25677e+06	3	0.1571	1.13929	0.2369	MQ	q	I
110	4104_ML_FinalNorm	AR-22Y-0060DHT	O00299	CLIC1	Chloride intracellular channel protein 1 (Chloride channel ABP) (Nuclear chloride ion channel 27) (NCC27) (Regulatory nuclear chloride ion channel protein) (hRNCC)	0.861486	1.2E+07|NAN|2.5E+06	1.40456e+07	7.02278e+06	3	8.8E+06|5.3E+06|7.6E+06	2.17703e+07	7.25677e+06	3	0.1158	0.967754	0.2554	MQ	q	I
111	4104_ML_FinalNorm	AR-WT-0000DHT	O00299	CLIC1	Chloride intracellular channel protein 1 (Chloride channel ABP) (Nuclear chloride ion channel 27) (NCC27) (Regulatory nuclear chloride ion channel protein) (hRNCC)	0.861486	9.4E+06|8.0E+06|9.0E+06	2.63094e+07	8.76979e+06	3	8.8E+06|5.3E+06|7.6E+06	2.17703e+07	7.25677e+06	3	0.0871	1.2085	0.2757	MQ	q	I
112	4104_ML_FinalNorm	AR-WT-0060DHT	O00299	CLIC1	Chloride intracellular channel protein 1 (Chloride channel ABP) (Nuclear chloride ion channel 27) (NCC27) (Regulatory nuclear chloride ion channel protein) (hRNCC)	0.861486	1.1E+06|3.9E+06|3.6E+06	8.59208e+06	2.86403e+06	3	8.8E+06|5.3E+06|7.6E+06	2.17703e+07	7.25677e+06	3	0.0073	0.394669	0.5222	MQ	q	I
113	4104_ML_FinalNorm	AR-22Y-0000DHT	O00303	EIF3F	Eukaryotic translation initiation factor 3 subunit F (eIF3f) (Deubiquitinating enzyme eIF3f) (EC 3.4.19.12) (Eukaryotic translation initiation factor 3 subunit 5) (eIF-3-epsilon) (eIF3 p47)	0.930366	3.6E+07|6.7E+07|6.7E+07	1.71021e+08	5.70069e+07	3	5.2E+07|5.1E+07|5.2E+07	1.55275e+08	5.17585e+07	3	0.104	1.1014	0.263	MQ	q	I
114	4104_ML_FinalNorm	AR-22Y-0060DHT	O00303	EIF3F	Eukaryotic translation initiation factor 3 subunit F (eIF3f) (Deubiquitinating enzyme eIF3f) (EC 3.4.19.12) (Eukaryotic translation initiation factor 3 subunit 5) (eIF-3-epsilon) (eIF3 p47)	0.930366	5.0E+07|4.8E+07|5.1E+07	1.48849e+08	4.96164e+07	3	5.2E+07|5.1E+07|5.2E+07	1.55275e+08	5.17585e+07	3	0.0246	0.958615	0.4004	MQ	q	I
115	4104_ML_FinalNorm	AR-WT-0000DHT	O00303	EIF3F	Eukaryotic translation initiation factor 3 subunit F (eIF3f) (Deubiquitinating enzyme eIF3f) (EC 3.4.19.12) (Eukaryotic translation initiation factor 3 subunit 5) (eIF-3-epsilon) (eIF3 p47)	0.930366	4.5E+07|4.3E+07|4.5E+07	1.33044e+08	4.4348e+07	3	5.2E+07|5.1E+07|5.2E+07	1.55275e+08	5.17585e+07	3	0.0199	0.856827	0.4284	MQ	q	I
116	4104_ML_FinalNorm	AR-WT-0060DHT	O00303	EIF3F	Eukaryotic translation initiation factor 3 subunit F (eIF3f) (Deubiquitinating enzyme eIF3f) (EC 3.4.19.12) (Eukaryotic translation initiation factor 3 subunit 5) (eIF-3-epsilon) (eIF3 p47)	0.930366	2.8E+07|3.0E+07|3.4E+07	9.18712e+07	3.06237e+07	3	5.2E+07|5.1E+07|5.2E+07	1.55275e+08	5.17585e+07	3	0.0088	0.591666	0.5077	MQ	q	I
117	4104_ML_FinalNorm	AR-22Y-0000DHT	O00400	SLC33A1	Acetyl-coenzyme A transporter 1 (AT-1) (Acetyl-CoA transporter 1) (Solute carrier family 33 member 1)	0	6.0E+06|6.3E+06|8.3E+06	2.06078e+07	6.86927e+06	3	3.4E+06|3.8E+05|7.1E+05	4.52461e+06	1.5082e+06	3	0.6432	4.5546	0.0673	MQ	q	I
118	4104_ML_FinalNorm	AR-22Y-0060DHT	O00400	SLC33A1	Acetyl-coenzyme A transporter 1 (AT-1) (Acetyl-CoA transporter 1) (Solute carrier family 33 member 1)	0	1.8E+07|1.6E+07|1.7E+07	5.11863e+07	1.70621e+07	3	3.4E+06|3.8E+05|7.1E+05	4.52461e+06	1.5082e+06	3	0.9149	11.3129	0.0051	MQ	q	I
119	4104_ML_FinalNorm	AR-WT-0000DHT	O00400	SLC33A1	Acetyl-coenzyme A transporter 1 (AT-1) (Acetyl-CoA transporter 1) (Solute carrier family 33 member 1)	0	4.0E+05|NAN|NAN	398663	398663	3	3.4E+06|3.8E+05|7.1E+05	4.52461e+06	1.5082e+06	3	0.0312	0.264329	0.368	MQ	q	I
120	4104_ML_FinalNorm	AR-WT-0060DHT	O00400	SLC33A1	Acetyl-coenzyme A transporter 1 (AT-1) (Acetyl-CoA transporter 1) (Solute carrier family 33 member 1)	0	9.7E+05|2.3E+06|NAN	3.26925e+06	1.63463e+06	3	3.4E+06|3.8E+05|7.1E+05	4.52461e+06	1.5082e+06	3	0.1675	1.08382	0.2309	MQ	q	I
121	4104_ML_FinalNorm	AR-WT-0000DHT	O00401	WASL	Neural Wiskott-Aldrich syndrome protein (N-WASP)	0	6.3E+06|1.0E+07|8.2E+06	2.50172e+07	8.33908e+06	3	2.3E+06|2.8E+06|8.4E+05	5.86065e+06	1.95355e+06	3	0.8708	4.26868	0.0077	MQ	q	I
122	4104_ML_FinalNorm	AR-WT-0060DHT	O00401	WASL	Neural Wiskott-Aldrich syndrome protein (N-WASP)	0	5.9E+06|5.4E+06|1.1E+07	2.18848e+07	7.29495e+06	3	2.3E+06|2.8E+06|8.4E+05	5.86065e+06	1.95355e+06	3	0.7742	3.7342	0.0172	MQ	q	I
123	4104_ML_FinalNorm	AR-22Y-0000DHT	O00410	IPO5	Importin-5 (Imp5) (Importin subunit beta-3) (Karyopherin beta-3) (Ran-binding protein 5) (RanBP5)	0.916097	NAN|1.2E+07|1.1E+07	2.34765e+07	1.17382e+07	3	1.0E+08|8.4E+07|1.0E+08	2.88636e+08	9.62121e+07	3	0	0.122004	0.6339	MQ	q	I
124	4104_ML_FinalNorm	AR-22Y-0060DHT	O00410	IPO5	Importin-5 (Imp5) (Importin subunit beta-3) (Karyopherin beta-3) (Ran-binding protein 5) (RanBP5)	0.916097	4.9E+06|NAN|6.7E+06	1.16556e+07	5.82781e+06	3	1.0E+08|8.4E+07|1.0E+08	2.88636e+08	9.62121e+07	3	0	0.0605725	0.6339	MQ	q	I
125	4104_ML_FinalNorm	AR-WT-0000DHT	O00410	IPO5	Importin-5 (Imp5) (Importin subunit beta-3) (Karyopherin beta-3) (Ran-binding protein 5) (RanBP5)	0.916097	3.5E+06|3.4E+06|1.6E+06	8.46397e+06	2.82132e+06	3	1.0E+08|8.4E+07|1.0E+08	2.88636e+08	9.62121e+07	3	0	0.029324	0.6339	MQ	q	I
126	4104_ML_FinalNorm	AR-WT-0060DHT	O00410	IPO5	Importin-5 (Imp5) (Importin subunit beta-3) (Karyopherin beta-3) (Ran-binding protein 5) (RanBP5)	0.916097	2.9E+06|4.3E+06|4.5E+06	1.16584e+07	3.88613e+06	3	1.0E+08|8.4E+07|1.0E+08	2.88636e+08	9.62121e+07	3	0	0.0403912	0.6339	MQ	q	I
127	4104_ML_FinalNorm	AR-22Y-0000DHT	O00422	SAP18	Histone deacetylase complex subunit SAP18 (18 kDa Sin3-associated polypeptide) (2HOR0202) (Cell growth-inhibiting gene 38 protein) (Sin3-associated polypeptide p18)	0.895642	8.3E+06|5.3E+06|2.3E+06	1.59221e+07	5.30735e+06	3	2.3E+05|4.9E+06|3.8E+06	8.93364e+06	2.97788e+06	3	0.5077	1.78226	0.0949	MQ	q	I
128	4104_ML_FinalNorm	AR-22Y-0060DHT	O00422	SAP18	Histone deacetylase complex subunit SAP18 (18 kDa Sin3-associated polypeptide) (2HOR0202) (Cell growth-inhibiting gene 38 protein) (Sin3-associated polypeptide p18)	0.895642	3.1E+06|5.1E+06|NAN	8.21064e+06	4.10532e+06	3	2.3E+05|4.9E+06|3.8E+06	8.93364e+06	2.97788e+06	3	0.3314	1.3786	0.1735	MQ	q	I
129	4104_ML_FinalNorm	AR-22Y-0000DHT	O00429	DNM1L	Dynamin-1-like protein (EC 3.6.5.5) (Dnm1p/Vps1p-like protein) (DVLP) (Dynamin family member proline-rich carboxyl-terminal domain less) (Dymple) (Dynamin-like protein) (Dynamin-like protein 4) (Dynamin-like protein IV) (HdynIV) (Dynamin-related protein 1)	0.840987	NAN|5.3E+06|7.1E+05	6.02017e+06	3.01009e+06	3	5.1E+06|7.6E+06|7.2E+06	1.99034e+07	6.63446e+06	3	0.008	0.453705	0.515	MQ	q	I
130	4104_ML_FinalNorm	AR-WT-0000DHT	O00429	DNM1L	Dynamin-1-like protein (EC 3.6.5.5) (Dnm1p/Vps1p-like protein) (DVLP) (Dynamin family member proline-rich carboxyl-terminal domain less) (Dymple) (Dynamin-like protein) (Dynamin-like protein 4) (Dynamin-like protein IV) (HdynIV) (Dynamin-related protein 1)	0.840987	3.5E+06|5.1E+06|3.4E+06	1.19195e+07	3.97316e+06	3	5.1E+06|7.6E+06|7.2E+06	1.99034e+07	6.63446e+06	3	0.0129	0.598866	0.4759	MQ	q	I
131	4104_ML_FinalNorm	AR-WT-0060DHT	O00429	DNM1L	Dynamin-1-like protein (EC 3.6.5.5) (Dnm1p/Vps1p-like protein) (DVLP) (Dynamin family member proline-rich carboxyl-terminal domain less) (Dymple) (Dynamin-like protein) (Dynamin-like protein 4) (Dynamin-like protein IV) (HdynIV) (Dynamin-related protein 1)	0.840987	2.3E+06|5.3E+06|2.1E+06	9.67888e+06	3.22629e+06	3	5.1E+06|7.6E+06|7.2E+06	1.99034e+07	6.63446e+06	3	0.0094	0.486293	0.5031	MQ	q	I
132	4104_ML_FinalNorm	AR-22Y-0000DHT	O00443	PIK3C2A	Phosphatidylinositol 4-phosphate 3-kinase C2 domain-containing subunit alpha (PI3K-C2-alpha) (PtdIns-3-kinase C2 subunit alpha) (EC 2.7.1.137) (EC 2.7.1.153) (EC 2.7.1.154) (Phosphoinositide 3-kinase-C2-alpha)	0.731303	2.6E+06|6.1E+06|3.7E+06	1.23136e+07	4.10452e+06	3	3.4E+07|3.6E+07|3.3E+07	1.04014e+08	3.46715e+07	3	0.0036	0.118383	0.5629	MQ	q	I
133	4104_ML_FinalNorm	AR-22Y-0060DHT	O00443	PIK3C2A	Phosphatidylinositol 4-phosphate 3-kinase C2 domain-containing subunit alpha (PI3K-C2-alpha) (PtdIns-3-kinase C2 subunit alpha) (EC 2.7.1.137) (EC 2.7.1.153) (EC 2.7.1.154) (Phosphoinositide 3-kinase-C2-alpha)	0.731303	1.3E+07|3.3E+07|2.2E+07	6.79957e+07	2.26652e+07	3	3.4E+07|3.6E+07|3.3E+07	1.04014e+08	3.46715e+07	3	0.0251	0.653714	0.3975	MQ	q	I
134	4104_ML_FinalNorm	AR-WT-0000DHT	O00443	PIK3C2A	Phosphatidylinositol 4-phosphate 3-kinase C2 domain-containing subunit alpha (PI3K-C2-alpha) (PtdIns-3-kinase C2 subunit alpha) (EC 2.7.1.137) (EC 2.7.1.153) (EC 2.7.1.154) (Phosphoinositide 3-kinase-C2-alpha)	0.731303	7.9E+07|8.7E+07|8.5E+07	2.51866e+08	8.39553e+07	3	3.4E+07|3.6E+07|3.3E+07	1.04014e+08	3.46715e+07	3	1	2.42145	0	MQ	q	I
135	4104_ML_FinalNorm	AR-WT-0060DHT	O00443	PIK3C2A	Phosphatidylinositol 4-phosphate 3-kinase C2 domain-containing subunit alpha (PI3K-C2-alpha) (PtdIns-3-kinase C2 subunit alpha) (EC 2.7.1.137) (EC 2.7.1.153) (EC 2.7.1.154) (Phosphoinositide 3-kinase-C2-alpha)	0.731303	7.0E+07|6.8E+07|5.9E+07	1.97085e+08	6.56949e+07	3	3.4E+07|3.6E+07|3.3E+07	1.04014e+08	3.46715e+07	3	0.9825	1.89478	0.0009	MQ	q	I
136	4104_ML_FinalNorm	AR-WT-0000DHT	O00459	PIK3R2	Phosphatidylinositol 3-kinase regulatory subunit beta (PI3-kinase regulatory subunit beta) (PI3K regulatory subunit beta) (PtdIns-3-kinase regulatory subunit beta) (Phosphatidylinositol 3-kinase 85 kDa regulatory subunit beta) (PI3-kinase subunit p85-beta) (PtdIns-3-kinase regulatory subunit p85-beta)	0.567531	3.9E+05|1.5E+06|2.1E+06	4.0618e+06	1.35393e+06	3	6.5E+05|NAN|1.6E+06	2.21382e+06	1.10691e+06	3	0.2936	1.22316	0.1851	MQ	q	I
137	4104_ML_FinalNorm	AR-WT-0060DHT	O00459	PIK3R2	Phosphatidylinositol 3-kinase regulatory subunit beta (PI3-kinase regulatory subunit beta) (PI3K regulatory subunit beta) (PtdIns-3-kinase regulatory subunit beta) (Phosphatidylinositol 3-kinase 85 kDa regulatory subunit beta) (PI3-kinase subunit p85-beta) (PtdIns-3-kinase regulatory subunit p85-beta)	0.567531	8.9E+05|NAN|NAN	888279	888279	3	6.5E+05|NAN|1.6E+06	2.21382e+06	1.10691e+06	3	0.0314	0.802484	0.3667	MQ	q	I
138	4104_ML_FinalNorm	AR-22Y-0000DHT	O00483	NDUFA4	Cytochrome c oxidase subunit NDUFA4 (Complex I-MLRQ) (CI-MLRQ) (NADH-ubiquinone oxidoreductase MLRQ subunit)	0.56433	1.1E+07|3.8E+06|1.0E+07	2.45932e+07	8.19774e+06	3	5.2E+06|4.4E+06|5.1E+06	1.47733e+07	4.92445e+06	3	0.6765	1.6647	0.036	MQ	q	I
139	4104_ML_FinalNorm	AR-22Y-0060DHT	O00483	NDUFA4	Cytochrome c oxidase subunit NDUFA4 (Complex I-MLRQ) (CI-MLRQ) (NADH-ubiquinone oxidoreductase MLRQ subunit)	0.56433	2.0E+07|1.9E+07|2.0E+07	5.96691e+07	1.98897e+07	3	5.2E+06|4.4E+06|5.1E+06	1.47733e+07	4.92445e+06	3	1	4.03897	0	MQ	q	I
140	4104_ML_FinalNorm	AR-WT-0000DHT	O00483	NDUFA4	Cytochrome c oxidase subunit NDUFA4 (Complex I-MLRQ) (CI-MLRQ) (NADH-ubiquinone oxidoreductase MLRQ subunit)	0.56433	1.5E+06|8.6E+05|NAN	2.40505e+06	1.20253e+06	3	5.2E+06|4.4E+06|5.1E+06	1.47733e+07	4.92445e+06	3	0.0066	0.244195	0.5292	MQ	q	I
141	4104_ML_FinalNorm	AR-WT-0060DHT	O00483	NDUFA4	Cytochrome c oxidase subunit NDUFA4 (Complex I-MLRQ) (CI-MLRQ) (NADH-ubiquinone oxidoreductase MLRQ subunit)	0.56433	1.1E+06|1.2E+06|1.2E+06	3.47105e+06	1.15702e+06	3	5.2E+06|4.4E+06|5.1E+06	1.47733e+07	4.92445e+06	3	0.0095	0.234953	0.5013	MQ	q	I
142	4104_ML_FinalNorm	AR-22Y-0000DHT	O00487	PSMD14	26S proteasome non-ATPase regulatory subunit 14 (EC 3.4.19.-) (26S proteasome regulatory subunit RPN11) (26S proteasome-associated PAD1 homolog 1)	0.899218	7.7E+06|7.5E+06|9.2E+06	2.44548e+07	8.15161e+06	3	3.8E+06|3.6E+06|4.8E+06	1.2252e+07	4.08398e+06	3	0.9972	1.99599	0.0001	MQ	q	I
143	4104_ML_FinalNorm	AR-22Y-0060DHT	O00487	PSMD14	26S proteasome non-ATPase regulatory subunit 14 (EC 3.4.19.-) (26S proteasome regulatory subunit RPN11) (26S proteasome-associated PAD1 homolog 1)	0.899218	8.9E+06|8.2E+06|8.9E+06	2.59885e+07	8.66283e+06	3	3.8E+06|3.6E+06|4.8E+06	1.2252e+07	4.08398e+06	3	0.9998	2.12117	0	MQ	q	I
144	4104_ML_FinalNorm	AR-WT-0000DHT	O00487	PSMD14	26S proteasome non-ATPase regulatory subunit 14 (EC 3.4.19.-) (26S proteasome regulatory subunit RPN11) (26S proteasome-associated PAD1 homolog 1)	0.899218	3.0E+06|2.1E+06|2.1E+06	7.17959e+06	2.3932e+06	3	3.8E+06|3.6E+06|4.8E+06	1.2252e+07	4.08398e+06	3	0.009	0.585996	0.5064	MQ	q	I
145	4104_ML_FinalNorm	AR-WT-0060DHT	O00487	PSMD14	26S proteasome non-ATPase regulatory subunit 14 (EC 3.4.19.-) (26S proteasome regulatory subunit RPN11) (26S proteasome-associated PAD1 homolog 1)	0.899218	1.9E+06|2.1E+06|1.8E+06	5.80336e+06	1.93445e+06	3	3.8E+06|3.6E+06|4.8E+06	1.2252e+07	4.08398e+06	3	0.005	0.473669	0.546	MQ	q	I
146	4104_ML_FinalNorm	AR-WT-0000DHT	O00505	KPNA3	Importin subunit alpha-4 (Importin alpha Q2) (Qip2) (Karyopherin subunit alpha-3) (SRP1-gamma)	0.842585	1.5E+07|1.8E+07|1.4E+07	4.61387e+07	1.53796e+07	3	8.9E+06|1.1E+07|9.7E+06	2.95595e+07	9.85318e+06	3	0.6483	1.56087	0.0661	MQ	q	I
147	4104_ML_FinalNorm	AR-WT-0060DHT	O00505	KPNA3	Importin subunit alpha-4 (Importin alpha Q2) (Qip2) (Karyopherin subunit alpha-3) (SRP1-gamma)	0.842585	1.3E+07|1.3E+07|1.5E+07	4.04896e+07	1.34965e+07	3	8.9E+06|1.1E+07|9.7E+06	2.95595e+07	9.85318e+06	3	0.322	1.36976	0.1774	MQ	q	I
148	4104_ML_FinalNorm	AR-22Y-0000DHT	O00512	BCL9	B-cell CLL/lymphoma 9 protein (B-cell lymphoma 9 protein) (Bcl-9) (Protein legless homolog)	0	2.0E+08|2.2E+08|2.5E+08	6.66524e+08	2.22175e+08	3	1.2E+07|8.6E+06|1.4E+07	3.42814e+07	1.14271e+07	3	1	19.4428	0	MQ	q	I
149	4104_ML_FinalNorm	AR-22Y-0060DHT	O00512	BCL9	B-cell CLL/lymphoma 9 protein (B-cell lymphoma 9 protein) (Bcl-9) (Protein legless homolog)	0	4.8E+07|7.1E+07|6.4E+07	1.83327e+08	6.11089e+07	3	1.2E+07|8.6E+06|1.4E+07	3.42814e+07	1.14271e+07	3	1	5.3477	0	MQ	q	I
150	4104_ML_FinalNorm	AR-WT-0000DHT	O00512	BCL9	B-cell CLL/lymphoma 9 protein (B-cell lymphoma 9 protein) (Bcl-9) (Protein legless homolog)	0	2.5E+07|2.0E+07|1.8E+07	6.36597e+07	2.12199e+07	3	1.2E+07|8.6E+06|1.4E+07	3.42814e+07	1.14271e+07	3	0.6289	1.85697	0.0709	MQ	q	I
151	4104_ML_FinalNorm	AR-WT-0060DHT	O00512	BCL9	B-cell CLL/lymphoma 9 protein (B-cell lymphoma 9 protein) (Bcl-9) (Protein legless homolog)	0	1.7E+08|1.6E+08|1.6E+08	4.90561e+08	1.6352e+08	3	1.2E+07|8.6E+06|1.4E+07	3.42814e+07	1.14271e+07	3	1	14.3099	0	MQ	q	I
152	4104_ML_FinalNorm	AR-WT-0060DHT	O00541	PES1	Pescadillo homolog	0.90045	7.2E+05|NAN|5.6E+05	1.27955e+06	639775	3	2.1E+06|3.0E+06|2.5E+06	7.58254e+06	2.52751e+06	3	0.0005	0.253124	0.6148	MQ	q	I
153	4104_ML_FinalNorm	AR-22Y-0000DHT	O00567	NOP56	Nucleolar protein 56 (Nucleolar protein 5A)	0.935457	3.8E+07|4.3E+07|4.1E+07	1.21841e+08	4.06136e+07	3	2.2E+07|1.7E+07|1.7E+07	5.57863e+07	1.85954e+07	3	0.9997	2.18407	0	MQ	q	I
154	4104_ML_FinalNorm	AR-22Y-0060DHT	O00567	NOP56	Nucleolar protein 56 (Nucleolar protein 5A)	0.935457	6.7E+07|6.3E+07|5.8E+07	1.88689e+08	6.28963e+07	3	2.2E+07|1.7E+07|1.7E+07	5.57863e+07	1.85954e+07	3	1	3.38235	0	MQ	q	I
155	4104_ML_FinalNorm	AR-WT-0000DHT	O00567	NOP56	Nucleolar protein 56 (Nucleolar protein 5A)	0.935457	8.1E+05|NAN|NAN	814680	814680	3	2.2E+07|1.7E+07|1.7E+07	5.57863e+07	1.85954e+07	3	0.0017	0.0438108	0.5923	MQ	q	I
156	4104_ML_FinalNorm	AR-WT-0060DHT	O00567	NOP56	Nucleolar protein 56 (Nucleolar protein 5A)	0.935457	NAN|1.2E+06|8.6E+05	2.10176e+06	1.05088e+06	3	2.2E+07|1.7E+07|1.7E+07	5.57863e+07	1.85954e+07	3	0.0042	0.0565128	0.5547	MQ	q	I
157	4104_ML_FinalNorm	AR-22Y-0000DHT	O00571	DDX3X	ATP-dependent RNA helicase DDX3X (EC 3.6.4.13) (CAP-Rf) (DEAD box protein 3, X-chromosomal) (DEAD box, X isoform) (DBX) (Helicase-like protein 2) (HLP2)	0.980995	7.2E+07|8.7E+07|1.1E+08	2.6423e+08	8.80767e+07	3	5.0E+07|5.6E+07|5.9E+07	1.65155e+08	5.50515e+07	3	0.6514	1.5999	0.0655	MQ	q	I
158	4104_ML_FinalNorm	AR-22Y-0060DHT	O00571	DDX3X	ATP-dependent RNA helicase DDX3X (EC 3.6.4.13) (CAP-Rf) (DEAD box protein 3, X-chromosomal) (DEAD box, X isoform) (DBX) (Helicase-like protein 2) (HLP2)	0.980995	1.6E+08|1.7E+08|2.2E+08	5.44097e+08	1.81366e+08	3	5.0E+07|5.6E+07|5.9E+07	1.65155e+08	5.50515e+07	3	1	3.29447	0	MQ	q	I
159	4104_ML_FinalNorm	AR-WT-0000DHT	O00571	DDX3X	ATP-dependent RNA helicase DDX3X (EC 3.6.4.13) (CAP-Rf) (DEAD box protein 3, X-chromosomal) (DEAD box, X isoform) (DBX) (Helicase-like protein 2) (HLP2)	0.980995	4.6E+07|5.1E+07|3.8E+07	1.36166e+08	4.53887e+07	3	5.0E+07|5.6E+07|5.9E+07	1.65155e+08	5.50515e+07	3	0.0186	0.824476	0.4364	MQ	q	I
160	4104_ML_FinalNorm	AR-WT-0060DHT	O00571	DDX3X	ATP-dependent RNA helicase DDX3X (EC 3.6.4.13) (CAP-Rf) (DEAD box protein 3, X-chromosomal) (DEAD box, X isoform) (DBX) (Helicase-like protein 2) (HLP2)	0.980995	3.9E+07|5.0E+07|4.3E+07	1.31508e+08	4.38361e+07	3	5.0E+07|5.6E+07|5.9E+07	1.65155e+08	5.50515e+07	3	0.0173	0.796275	0.4448	MQ	q	I
161	4104_ML_FinalNorm	AR-22Y-0000DHT	O00629	KPNA4	Importin subunit alpha-3 (Importin alpha Q1) (Qip1) (Karyopherin subunit alpha-4)	0.855036	4.0E+06|4.6E+06|3.4E+06	1.20396e+07	4.01319e+06	3	4.8E+06|6.9E+06|8.5E+06	2.0192e+07	6.73067e+06	3	0.0177	0.596254	0.4421	MQ	q	I
162	4104_ML_FinalNorm	AR-22Y-0060DHT	O00629	KPNA4	Importin subunit alpha-3 (Importin alpha Q1) (Qip1) (Karyopherin subunit alpha-4)	0.855036	3.4E+06|NAN|NAN	3.44841e+06	3.44841e+06	3	4.8E+06|6.9E+06|8.5E+06	2.0192e+07	6.73067e+06	3	0.004	0.512342	0.5576	MQ	q	I
163	4104_ML_FinalNorm	AR-WT-0000DHT	O00629	KPNA4	Importin subunit alpha-3 (Importin alpha Q1) (Qip1) (Karyopherin subunit alpha-4)	0.855036	5.8E+05|NAN|1.1E+06	1.72239e+06	861194	3	4.8E+06|6.9E+06|8.5E+06	2.0192e+07	6.73067e+06	3	0.0001	0.127951	0.6286	MQ	q	I
164	4104_ML_FinalNorm	AR-WT-0060DHT	O00629	KPNA4	Importin subunit alpha-3 (Importin alpha Q1) (Qip1) (Karyopherin subunit alpha-4)	0.855036	1.5E+06|1.3E+06|1.4E+06	4.2167e+06	1.40557e+06	3	4.8E+06|6.9E+06|8.5E+06	2.0192e+07	6.73067e+06	3	0.0007	0.20883	0.6098	MQ	q	I
165	4104_ML_FinalNorm	AR-22Y-0000DHT	O00712	NFIB	Nuclear factor 1 B-type (NF1-B) (Nuclear factor 1/B) (CCAAT-box-binding transcription factor) (CTF) (Nuclear factor I/B) (NF-I/B) (NFI-B) (TGGCA-binding protein)	0.536361	6.0E+06|NAN|NAN	5.95321e+06	5.95321e+06	3	1.9E+06|1.8E+06|2.8E+06	6.47192e+06	2.15731e+06	3	0.3332	2.75956	0.1713	MQ	q	I
166	4104_ML_FinalNorm	AR-22Y-0060DHT	O00712	NFIB	Nuclear factor 1 B-type (NF1-B) (Nuclear factor 1/B) (CCAAT-box-binding transcription factor) (CTF) (Nuclear factor I/B) (NF-I/B) (NFI-B) (TGGCA-binding protein)	0.536361	2.6E+06|2.4E+06|3.2E+06	8.2506e+06	2.7502e+06	3	1.9E+06|1.8E+06|2.8E+06	6.47192e+06	2.15731e+06	3	0.1285	1.27483	0.2494	MQ	q	I
167	4104_ML_FinalNorm	AR-WT-0000DHT	O00712	NFIB	Nuclear factor 1 B-type (NF1-B) (Nuclear factor 1/B) (CCAAT-box-binding transcription factor) (CTF) (Nuclear factor I/B) (NF-I/B) (NFI-B) (TGGCA-binding protein)	0.536361	6.1E+05|4.4E+06|2.7E+06	7.72903e+06	2.57634e+06	3	1.9E+06|1.8E+06|2.8E+06	6.47192e+06	2.15731e+06	3	0.3445	1.19424	0.1404	MQ	q	I
168	4104_ML_FinalNorm	AR-WT-0060DHT	O00712	NFIB	Nuclear factor 1 B-type (NF1-B) (Nuclear factor 1/B) (CCAAT-box-binding transcription factor) (CTF) (Nuclear factor I/B) (NF-I/B) (NFI-B) (TGGCA-binding protein)	0.536361	6.1E+07|6.1E+07|5.9E+07	1.81132e+08	6.03774e+07	3	1.9E+06|1.8E+06|2.8E+06	6.47192e+06	2.15731e+06	3	1	27.9874	0	MQ	q	I
169	4104_ML_FinalNorm	AR-22Y-0060DHT	O00743	PPP6C	Serine/threonine-protein phosphatase 6 catalytic subunit (PP6C) (EC 3.1.3.16) [Cleaved into: Serine/threonine-protein phosphatase 6 catalytic subunit, N-terminally processed]	0.682669	NAN|1.3E+06|NAN	1.26335e+06	1.26335e+06	3	2.3E+06|1.0E+06|2.1E+06	5.32596e+06	1.77532e+06	3	0.014	0.71162	0.4675	MQ	q	I
170	4104_ML_FinalNorm	AR-WT-0000DHT	O00743	PPP6C	Serine/threonine-protein phosphatase 6 catalytic subunit (PP6C) (EC 3.1.3.16) [Cleaved into: Serine/threonine-protein phosphatase 6 catalytic subunit, N-terminally processed]	0.682669	3.2E+06|5.2E+06|4.4E+06	1.28403e+07	4.28009e+06	3	2.3E+06|1.0E+06|2.1E+06	5.32596e+06	1.77532e+06	3	0.6634	2.41088	0.062	MQ	q	I
171	4104_ML_FinalNorm	AR-WT-0060DHT	O00743	PPP6C	Serine/threonine-protein phosphatase 6 catalytic subunit (PP6C) (EC 3.1.3.16) [Cleaved into: Serine/threonine-protein phosphatase 6 catalytic subunit, N-terminally processed]	0.682669	2.0E+06|1.7E+06|2.0E+06	5.71443e+06	1.90481e+06	3	2.3E+06|1.0E+06|2.1E+06	5.32596e+06	1.77532e+06	3	0.0921	1.07294	0.2698	MQ	q	I
172	4104_ML_FinalNorm	AR-22Y-0000DHT	O00763	ACACB	Acetyl-CoA carboxylase 2 (EC 6.4.1.2) (ACC-beta)	0.935733	7.2E+07|7.8E+07|5.9E+07	2.09599e+08	6.98662e+07	3	4.0E+08|3.5E+08|3.5E+08	1.09683e+09	3.65611e+08	3	0.0005	0.191094	0.6148	MQ	q	I
173	4104_ML_FinalNorm	AR-22Y-0060DHT	O00763	ACACB	Acetyl-CoA carboxylase 2 (EC 6.4.1.2) (ACC-beta)	0.935733	4.5E+07|6.2E+07|7.8E+07	1.84769e+08	6.15898e+07	3	4.0E+08|3.5E+08|3.5E+08	1.09683e+09	3.65611e+08	3	0.0003	0.168457	0.6208	MQ	q	I
174	4104_ML_FinalNorm	AR-WT-0000DHT	O00763	ACACB	Acetyl-CoA carboxylase 2 (EC 6.4.1.2) (ACC-beta)	0.935733	3.5E+08|3.4E+08|3.0E+08	9.86908e+08	3.28969e+08	3	4.0E+08|3.5E+08|3.5E+08	1.09683e+09	3.65611e+08	3	0.0245	0.899779	0.4007	MQ	q	I
175	4104_ML_FinalNorm	AR-WT-0060DHT	O00763	ACACB	Acetyl-CoA carboxylase 2 (EC 6.4.1.2) (ACC-beta)	0.935733	2.7E+08|2.8E+08|2.6E+08	8.0313e+08	2.6771e+08	3	4.0E+08|3.5E+08|3.5E+08	1.09683e+09	3.65611e+08	3	0.017	0.732226	0.4457	MQ	q	I
176	4104_ML_FinalNorm	AR-22Y-0000DHT	O14497	ARID1A	AT-rich interactive domain-containing protein 1A (ARID domain-containing protein 1A) (B120) (BRG1-associated factor 250) (BAF250) (BRG1-associated factor 250a) (BAF250A) (Osa homolog 1) (hOSA1) (SWI-like protein) (SWI/SNF complex protein p270) (SWI/SNF-related, matrix-associated, actin-dependent regulator of chromatin subfamily F member 1) (hELD)	0.771099	1.6E+07|8.4E+07|1.3E+08	2.3154e+08	7.71801e+07	3	9.2E+06|1.2E+07|1.1E+07	3.23252e+07	1.07751e+07	3	0.7791	7.16284	0.0168	MQ	q	I
177	4104_ML_FinalNorm	AR-22Y-0060DHT	O14497	ARID1A	AT-rich interactive domain-containing protein 1A (ARID domain-containing protein 1A) (B120) (BRG1-associated factor 250) (BAF250) (BRG1-associated factor 250a) (BAF250A) (Osa homolog 1) (hOSA1) (SWI-like protein) (SWI/SNF complex protein p270) (SWI/SNF-related, matrix-associated, actin-dependent regulator of chromatin subfamily F member 1) (hELD)	0.771099	NAN|1.5E+08|3.3E+06	1.53265e+08	7.66323e+07	3	9.2E+06|1.2E+07|1.1E+07	3.23252e+07	1.07751e+07	3	0.3354	7.112	0.1469	MQ	q	I
178	4104_ML_FinalNorm	AR-WT-0000DHT	O14497	ARID1A	AT-rich interactive domain-containing protein 1A (ARID domain-containing protein 1A) (B120) (BRG1-associated factor 250) (BAF250) (BRG1-associated factor 250a) (BAF250A) (Osa homolog 1) (hOSA1) (SWI-like protein) (SWI/SNF complex protein p270) (SWI/SNF-related, matrix-associated, actin-dependent regulator of chromatin subfamily F member 1) (hELD)	0.771099	3.6E+08|3.8E+08|3.6E+08	1.10359e+09	3.67863e+08	3	9.2E+06|1.2E+07|1.1E+07	3.23252e+07	1.07751e+07	3	1	34.1403	0	MQ	q	I
179	4104_ML_FinalNorm	AR-WT-0060DHT	O14497	ARID1A	AT-rich interactive domain-containing protein 1A (ARID domain-containing protein 1A) (B120) (BRG1-associated factor 250) (BAF250) (BRG1-associated factor 250a) (BAF250A) (Osa homolog 1) (hOSA1) (SWI-like protein) (SWI/SNF complex protein p270) (SWI/SNF-related, matrix-associated, actin-dependent regulator of chromatin subfamily F member 1) (hELD)	0.771099	7.2E+08|7.3E+08|6.8E+08	2.12918e+09	7.09726e+08	3	9.2E+06|1.2E+07|1.1E+07	3.23252e+07	1.07751e+07	3	1	65.8675	0	MQ	q	I
180	4104_ML_FinalNorm	AR-WT-0060DHT	O14503	BHLHE40	Class E basic helix-loop-helix protein 40 (bHLHe40) (Class B basic helix-loop-helix protein 2) (bHLHb2) (Differentially expressed in chondrocytes protein 1) (DEC1) (Enhancer-of-split and hairy-related protein 2) (SHARP-2) (Stimulated by retinoic acid gene 13 protein)	0	1.2E+07|1.1E+07|1.0E+07	3.32037e+07	1.10679e+07	3	5.4E+05|NAN|NAN	537782	537782	3	1	20.5806	0	MQ	q	I
181	4104_ML_FinalNorm	AR-22Y-0060DHT	O14530	TXNDC9	Thioredoxin domain-containing protein 9 (ATP-binding protein associated with cell differentiation) (Protein 1-4)	0.669103	4.3E+06|2.2E+06|2.8E+06	9.31915e+06	3.10638e+06	3	2.1E+06|3.2E+06|2.0E+06	7.34141e+06	2.44714e+06	3	0.2253	1.26939	0.2087	MQ	q	I
182	4104_ML_FinalNorm	AR-WT-0000DHT	O14530	TXNDC9	Thioredoxin domain-containing protein 9 (ATP-binding protein associated with cell differentiation) (Protein 1-4)	0.669103	NAN|1.2E+06|1.8E+06	3.00605e+06	1.50303e+06	3	2.1E+06|3.2E+06|2.0E+06	7.34141e+06	2.44714e+06	3	0.0113	0.614197	0.4882	MQ	q	I
183	4104_ML_FinalNorm	AR-WT-0060DHT	O14530	TXNDC9	Thioredoxin domain-containing protein 9 (ATP-binding protein associated with cell differentiation) (Protein 1-4)	0.669103	7.4E+05|6.4E+05|NAN	1.37453e+06	687264	3	2.1E+06|3.2E+06|2.0E+06	7.34141e+06	2.44714e+06	3	0.0011	0.280844	0.6013	MQ	q	I
184	4104_ML_FinalNorm	AR-22Y-0000DHT	O14531	DPYSL4	Dihydropyrimidinase-related protein 4 (DRP-4) (Collapsin response mediator protein 3) (CRMP-3) (UNC33-like phosphoprotein 4) (ULIP-4)	0.660982	1.7E+06|NAN|NAN	1.65521e+06	1.65521e+06	3	NAN|3.6E+05|2.8E+05	638610	319305	3	0.3333	5.18379	0.1476	MQ	q	I
185	4104_ML_FinalNorm	AR-22Y-0060DHT	O14531	DPYSL4	Dihydropyrimidinase-related protein 4 (DRP-4) (Collapsin response mediator protein 3) (CRMP-3) (UNC33-like phosphoprotein 4) (ULIP-4)	0.660982	NAN|1.2E+06|NAN	1.18872e+06	1.18872e+06	3	NAN|3.6E+05|2.8E+05	638610	319305	3	0.3333	3.72284	0.1476	MQ	q	I
186	4104_ML_FinalNorm	AR-WT-0000DHT	O14531	DPYSL4	Dihydropyrimidinase-related protein 4 (DRP-4) (Collapsin response mediator protein 3) (CRMP-3) (UNC33-like phosphoprotein 4) (ULIP-4)	0.660982	1.1E+07|1.3E+07|1.2E+07	3.52984e+07	1.17661e+07	3	NAN|3.6E+05|2.8E+05	638610	319305	3	1	36.8493	0	MQ	q	I
187	4104_ML_FinalNorm	AR-WT-0060DHT	O14531	DPYSL4	Dihydropyrimidinase-related protein 4 (DRP-4) (Collapsin response mediator protein 3) (CRMP-3) (UNC33-like phosphoprotein 4) (ULIP-4)	0.660982	8.1E+06|5.7E+06|6.5E+06	2.02867e+07	6.76222e+06	3	NAN|3.6E+05|2.8E+05	638610	319305	3	1	21.178	0	MQ	q	I
188	4104_ML_FinalNorm	AR-22Y-0000DHT	O14579	COPE	Coatomer subunit epsilon (Epsilon-coat protein) (Epsilon-COP)	0.807138	7.4E+06|7.5E+06|1.7E+07	3.21273e+07	1.07091e+07	3	1.4E+07|1.8E+07|1.1E+07	4.30641e+07	1.43547e+07	3	0.0314	0.746033	0.3667	MQ	q	I
189	4104_ML_FinalNorm	AR-22Y-0060DHT	O14579	COPE	Coatomer subunit epsilon (Epsilon-coat protein) (Epsilon-COP)	0.807138	3.3E+06|3.6E+06|4.9E+06	1.18529e+07	3.95096e+06	3	1.4E+07|1.8E+07|1.1E+07	4.30641e+07	1.43547e+07	3	0.0015	0.275238	0.5948	MQ	q	I
190	4104_ML_FinalNorm	AR-WT-0000DHT	O14579	COPE	Coatomer subunit epsilon (Epsilon-coat protein) (Epsilon-COP)	0.807138	3.1E+06|4.7E+06|4.3E+06	1.21183e+07	4.03944e+06	3	1.4E+07|1.8E+07|1.1E+07	4.30641e+07	1.43547e+07	3	0.0016	0.281402	0.5937	MQ	q	I
191	4104_ML_FinalNorm	AR-WT-0060DHT	O14579	COPE	Coatomer subunit epsilon (Epsilon-coat protein) (Epsilon-COP)	0.807138	2.6E+06|NAN|2.7E+06	5.25092e+06	2.62546e+06	3	1.4E+07|1.8E+07|1.1E+07	4.30641e+07	1.43547e+07	3	0.0002	0.182899	0.6234	MQ	q	I
192	4104_ML_FinalNorm	AR-WT-0000DHT	O14613	CDC42EP2	Cdc42 effector protein 2 (Binder of Rho GTPases 1)	0	5.1E+06|5.0E+06|5.2E+06	1.53154e+07	5.10513e+06	3	1.8E+06|2.1E+06|1.7E+06	5.64311e+06	1.88104e+06	3	1	2.714	0	MQ	q	I
193	4104_ML_FinalNorm	AR-WT-0060DHT	O14613	CDC42EP2	Cdc42 effector protein 2 (Binder of Rho GTPases 1)	0	1.5E+06|3.5E+06|1.6E+06	6.60596e+06	2.20199e+06	3	1.8E+06|2.1E+06|1.7E+06	5.64311e+06	1.88104e+06	3	0.3442	1.17062	0.1409	MQ	q	I
194	4104_ML_FinalNorm	AR-22Y-0000DHT	O14617	AP3D1	AP-3 complex subunit delta-1 (AP-3 complex subunit delta) (Adaptor-related protein complex 3 subunit delta-1) (Delta-adaptin)	0.894153	3.2E+06|6.0E+06|6.4E+06	1.56926e+07	5.23088e+06	3	1.5E+07|1.8E+07|1.8E+07	5.06531e+07	1.68844e+07	3	0.0078	0.309806	0.5169	MQ	q	I
195	4104_ML_FinalNorm	AR-22Y-0060DHT	O14617	AP3D1	AP-3 complex subunit delta-1 (AP-3 complex subunit delta) (Adaptor-related protein complex 3 subunit delta-1) (Delta-adaptin)	0.894153	3.6E+06|NAN|8.8E+05	4.42936e+06	2.21468e+06	3	1.5E+07|1.8E+07|1.8E+07	5.06531e+07	1.68844e+07	3	0.0013	0.131167	0.5984	MQ	q	I
196	4104_ML_FinalNorm	AR-WT-0000DHT	O14617	AP3D1	AP-3 complex subunit delta-1 (AP-3 complex subunit delta) (Adaptor-related protein complex 3 subunit delta-1) (Delta-adaptin)	0.894153	2.0E+07|1.9E+07|2.3E+07	6.18091e+07	2.0603e+07	3	1.5E+07|1.8E+07|1.8E+07	5.06531e+07	1.68844e+07	3	0.1192	1.22024	0.2545	MQ	q	I
197	4104_ML_FinalNorm	AR-WT-0060DHT	O14617	AP3D1	AP-3 complex subunit delta-1 (AP-3 complex subunit delta) (Adaptor-related protein complex 3 subunit delta-1) (Delta-adaptin)	0.894153	2.0E+07|1.7E+07|1.9E+07	5.66078e+07	1.88693e+07	3	1.5E+07|1.8E+07|1.8E+07	5.06531e+07	1.68844e+07	3	0.0591	1.11756	0.307	MQ	q	I
198	4104_ML_FinalNorm	AR-WT-0000DHT	O14641	DVL2	Segment polarity protein dishevelled homolog DVL-2 (Dishevelled-2) (DSH homolog 2)	0.839202	9.3E+06|1.5E+07|1.4E+07	3.85523e+07	1.28508e+07	3	NAN|8.9E+05|5.8E+05	1.46356e+06	731782	3	1	17.5609	0	MQ	q	I
199	4104_ML_FinalNorm	AR-WT-0060DHT	O14641	DVL2	Segment polarity protein dishevelled homolog DVL-2 (Dishevelled-2) (DSH homolog 2)	0.839202	4.3E+06|4.1E+06|8.6E+06	1.69487e+07	5.64955e+06	3	NAN|8.9E+05|5.8E+05	1.46356e+06	731782	3	1	7.72027	0	MQ	q	I
200	4104_ML_FinalNorm	AR-22Y-0000DHT	O14681	EI24	Etoposide-induced protein 2.4 homolog (p53-induced gene 8 protein)	0	NAN|3.1E+06|2.7E+06	5.76144e+06	2.88072e+06	3	9.2E+03|8.3E+03|8.0E+03	25587.4	8529.12	3	0.6667	337.751	0.0404	MQ	q	I
201	4104_ML_FinalNorm	AR-22Y-0060DHT	O14681	EI24	Etoposide-induced protein 2.4 homolog (p53-induced gene 8 protein)	0	1.4E+07|1.3E+07|1.9E+07	4.61611e+07	1.5387e+07	3	9.2E+03|8.3E+03|8.0E+03	25587.4	8529.12	3	1	1804.06	0	MQ	q	I
202	4104_ML_FinalNorm	AR-WT-0000DHT	O14681	EI24	Etoposide-induced protein 2.4 homolog (p53-induced gene 8 protein)	0	1.1E+06|1.1E+06|9.1E+05	3.01927e+06	1.00642e+06	3	9.2E+03|8.3E+03|8.0E+03	25587.4	8529.12	3	1	117.999	0	MQ	q	I
203	4104_ML_FinalNorm	AR-WT-0060DHT	O14681	EI24	Etoposide-induced protein 2.4 homolog (p53-induced gene 8 protein)	0	9.9E+05|1.2E+06|1.5E+06	3.63661e+06	1.2122e+06	3	9.2E+03|8.3E+03|8.0E+03	25587.4	8529.12	3	1	142.125	0	MQ	q	I
204	4104_ML_FinalNorm	AR-WT-0000DHT	O14686	KMT2D	Histone-lysine N-methyltransferase 2D (Lysine N-methyltransferase 2D) (EC 2.1.1.364) (ALL1-related protein) (Myeloid/lymphoid or mixed-lineage leukemia protein 2)	0.604609	5.7E+05|NAN|1.1E+06	1.69289e+06	846446	3	NAN|NAN|7.9E+05	793094	793094	3	0.2154	1.06727	0.2126	MQ	q	I
205	4104_ML_FinalNorm	AR-WT-0060DHT	O14686	KMT2D	Histone-lysine N-methyltransferase 2D (Lysine N-methyltransferase 2D) (EC 2.1.1.364) (ALL1-related protein) (Myeloid/lymphoid or mixed-lineage leukemia protein 2)	0.604609	6.8E+06|9.7E+06|9.7E+06	2.6166e+07	8.72199e+06	3	NAN|NAN|7.9E+05	793094	793094	3	1	10.9974	0	MQ	q	I
206	4104_ML_FinalNorm	AR-WT-0000DHT	O14735	CDIPT	CDP-diacylglycerol--inositol 3-phosphatidyltransferase (EC 2.7.8.11) (Phosphatidylinositol synthase) (PI synthase) (PtdIns synthase)	0.617084	2.0E+06|2.5E+06|2.4E+06	6.92289e+06	2.30763e+06	3	1.2E+06|1.7E+06|1.5E+06	4.39664e+06	1.46555e+06	3	0.5473	1.57459	0.0863	MQ	q	I
207	4104_ML_FinalNorm	AR-WT-0060DHT	O14735	CDIPT	CDP-diacylglycerol--inositol 3-phosphatidyltransferase (EC 2.7.8.11) (Phosphatidylinositol synthase) (PI synthase) (PtdIns synthase)	0.617084	2.6E+06|2.4E+06|2.5E+06	7.4915e+06	2.49717e+06	3	1.2E+06|1.7E+06|1.5E+06	4.39664e+06	1.46555e+06	3	0.7661	1.70391	0.0182	MQ	q	I
208	4104_ML_FinalNorm	AR-22Y-0000DHT	O14744	PRMT5	Protein arginine N-methyltransferase 5 (PRMT5) (EC 2.1.1.320) (72 kDa ICln-binding protein) (Histone-arginine N-methyltransferase PRMT5) (Jak-binding protein 1) (Shk1 kinase-binding protein 1 homolog) (SKB1 homolog) (SKB1Hs) [Cleaved into: Protein arginine N-methyltransferase 5, N-terminally processed]	0.986183	2.3E+06|4.1E+06|2.7E+06	9.13496e+06	3.04499e+06	3	3.2E+06|4.7E+06|4.2E+06	1.21773e+07	4.05911e+06	3	0.0303	0.750161	0.3715	MQ	q	I
209	4104_ML_FinalNorm	AR-22Y-0060DHT	O14744	PRMT5	Protein arginine N-methyltransferase 5 (PRMT5) (EC 2.1.1.320) (72 kDa ICln-binding protein) (Histone-arginine N-methyltransferase PRMT5) (Jak-binding protein 1) (Shk1 kinase-binding protein 1 homolog) (SKB1 homolog) (SKB1Hs) [Cleaved into: Protein arginine N-methyltransferase 5, N-terminally processed]	0.986183	1.0E+07|1.1E+07|1.4E+07	3.51388e+07	1.17129e+07	3	3.2E+06|4.7E+06|4.2E+06	1.21773e+07	4.05911e+06	3	0.9999	2.88559	0	MQ	q	I
210	4104_ML_FinalNorm	AR-WT-0000DHT	O14744	PRMT5	Protein arginine N-methyltransferase 5 (PRMT5) (EC 2.1.1.320) (72 kDa ICln-binding protein) (Histone-arginine N-methyltransferase PRMT5) (Jak-binding protein 1) (Shk1 kinase-binding protein 1 homolog) (SKB1 homolog) (SKB1Hs) [Cleaved into: Protein arginine N-methyltransferase 5, N-terminally processed]	0.986183	1.5E+06|2.4E+06|1.8E+06	5.68628e+06	1.89543e+06	3	3.2E+06|4.7E+06|4.2E+06	1.21773e+07	4.05911e+06	3	0.0152	0.466956	0.4595	MQ	q	I
211	4104_ML_FinalNorm	AR-WT-0060DHT	O14744	PRMT5	Protein arginine N-methyltransferase 5 (PRMT5) (EC 2.1.1.320) (72 kDa ICln-binding protein) (Histone-arginine N-methyltransferase PRMT5) (Jak-binding protein 1) (Shk1 kinase-binding protein 1 homolog) (SKB1 homolog) (SKB1Hs) [Cleaved into: Protein arginine N-methyltransferase 5, N-terminally processed]	0.986183	1.3E+06|9.0E+05|8.1E+05	2.9895e+06	996500	3	3.2E+06|4.7E+06|4.2E+06	1.21773e+07	4.05911e+06	3	0.0045	0.245497	0.5521	MQ	q	I
212	4104_ML_FinalNorm	AR-22Y-0000DHT	O14773	TPP1	Tripeptidyl-peptidase 1 (TPP-1) (EC 3.4.14.9) (Cell growth-inhibiting gene 1 protein) (Lysosomal pepstatin-insensitive protease) (LPIC) (Tripeptidyl aminopeptidase) (Tripeptidyl-peptidase I) (TPP-I)	0.48177	6.3E+06|1.2E+07|3.8E+06	2.26219e+07	7.54064e+06	3	NAN|NAN|3.8E+05	382621	382621	3	1	19.7079	0	MQ	q	I
213	4104_ML_FinalNorm	AR-22Y-0060DHT	O14773	TPP1	Tripeptidyl-peptidase 1 (TPP-1) (EC 3.4.14.9) (Cell growth-inhibiting gene 1 protein) (Lysosomal pepstatin-insensitive protease) (LPIC) (Tripeptidyl aminopeptidase) (Tripeptidyl-peptidase I) (TPP-I)	0.48177	5.7E+06|1.5E+07|1.4E+07	3.48877e+07	1.16292e+07	3	NAN|NAN|3.8E+05	382621	382621	3	1	30.3937	0	MQ	q	I
214	4104_ML_FinalNorm	AR-22Y-0000DHT	O14776	TCERG1	Transcription elongation regulator 1 (TATA box-binding protein-associated factor 2S) (Transcription factor CA150)	0.892646	NAN|5.2E+06|1.3E+07	1.82942e+07	9.1471e+06	3	1.0E+07|1.5E+07|1.6E+07	4.04972e+07	1.34991e+07	3	0.0217	0.67761	0.417	MQ	q	I
215	4104_ML_FinalNorm	AR-22Y-0060DHT	O14776	TCERG1	Transcription elongation regulator 1 (TATA box-binding protein-associated factor 2S) (Transcription factor CA150)	0.892646	1.5E+06|2.0E+06|NAN	3.52619e+06	1.76309e+06	3	1.0E+07|1.5E+07|1.6E+07	4.04972e+07	1.34991e+07	3	0.0012	0.130609	0.6	MQ	q	I
216	4104_ML_FinalNorm	AR-WT-0000DHT	O14776	TCERG1	Transcription elongation regulator 1 (TATA box-binding protein-associated factor 2S) (Transcription factor CA150)	0.892646	1.8E+07|1.7E+07|1.7E+07	5.17471e+07	1.7249e+07	3	1.0E+07|1.5E+07|1.6E+07	4.04972e+07	1.34991e+07	3	0.1136	1.27779	0.2568	MQ	q	I
217	4104_ML_FinalNorm	AR-WT-0060DHT	O14776	TCERG1	Transcription elongation regulator 1 (TATA box-binding protein-associated factor 2S) (Transcription factor CA150)	0.892646	2.6E+07|2.7E+07|1.8E+07	7.08812e+07	2.36271e+07	3	1.0E+07|1.5E+07|1.6E+07	4.04972e+07	1.34991e+07	3	0.6314	1.75027	0.0699	MQ	q	I
218	4104_ML_FinalNorm	AR-22Y-0000DHT	O14786	NRP1	Neuropilin-1 (Vascular endothelial cell growth factor 165 receptor) (CD antigen CD304)	0.125442	NAN|1.2E+07|NAN	1.19792e+07	1.19792e+07	3	5.4E+06|4.8E+06|3.2E+06	1.34089e+07	4.46965e+06	3	0.3318	2.68012	0.1733	MQ	q	I
219	4104_ML_FinalNorm	AR-22Y-0060DHT	O14786	NRP1	Neuropilin-1 (Vascular endothelial cell growth factor 165 receptor) (CD antigen CD304)	0.125442	5.6E+06|1.5E+07|5.6E+06	2.64077e+07	8.80257e+06	3	5.4E+06|4.8E+06|3.2E+06	1.34089e+07	4.46965e+06	3	0.4046	1.96941	0.1149	MQ	q	I
220	4104_ML_FinalNorm	AR-WT-0000DHT	O14786	NRP1	Neuropilin-1 (Vascular endothelial cell growth factor 165 receptor) (CD antigen CD304)	0.125442	NAN|NAN|1.1E+06	1.14804e+06	1.14804e+06	3	5.4E+06|4.8E+06|3.2E+06	1.34089e+07	4.46965e+06	3	0.0018	0.256853	0.5908	MQ	q	I
221	4104_ML_FinalNorm	AR-WT-0000DHT	O14787	TNPO2	Transportin-2 (Karyopherin beta-2b)	0.792646	9.2E+06|1.0E+07|1.0E+07	2.93444e+07	9.78146e+06	3	5.5E+06|1.0E+07|1.1E+07	2.63716e+07	8.79054e+06	3	0.0831	1.11273	0.2788	MQ	q	I
222	4104_ML_FinalNorm	AR-WT-0060DHT	O14787	TNPO2	Transportin-2 (Karyopherin beta-2b)	0.792646	9.7E+06|4.1E+06|4.2E+06	1.8094e+07	6.03133e+06	3	5.5E+06|1.0E+07|1.1E+07	2.63716e+07	8.79054e+06	3	0.0356	0.686115	0.3519	MQ	q	I
223	4104_ML_FinalNorm	AR-WT-0000DHT	O14802	POLR3A	DNA-directed RNA polymerase III subunit RPC1 (RNA polymerase III subunit C1) (EC 2.7.7.6) (DNA-directed RNA polymerase III largest subunit) (DNA-directed RNA polymerase III subunit A) (RNA polymerase III 155 kDa subunit) (RPC155) (RNA polymerase III subunit C160)	0.656394	9.6E+06|1.0E+07|1.1E+07	3.09367e+07	1.03122e+07	3	4.9E+06|4.3E+06|4.5E+06	1.3656e+07	4.55198e+06	3	0.9999	2.26544	0	MQ	q	I
224	4104_ML_FinalNorm	AR-WT-0060DHT	O14802	POLR3A	DNA-directed RNA polymerase III subunit RPC1 (RNA polymerase III subunit C1) (EC 2.7.7.6) (DNA-directed RNA polymerase III largest subunit) (DNA-directed RNA polymerase III subunit A) (RNA polymerase III 155 kDa subunit) (RPC155) (RNA polymerase III subunit C160)	0.656394	1.9E+06|4.2E+06|3.5E+06	9.54642e+06	3.18214e+06	3	4.9E+06|4.3E+06|4.5E+06	1.3656e+07	4.55198e+06	3	0.014	0.699066	0.4675	MQ	q	I
225	4104_ML_FinalNorm	AR-22Y-0000DHT	O14818	PSMA7	Proteasome subunit alpha type-7 (Proteasome subunit RC6-1) (Proteasome subunit XAPC7)	0.918004	8.3E+06|1.2E+07|1.4E+07	3.35227e+07	1.11742e+07	3	9.4E+06|5.6E+06|5.7E+06	2.06344e+07	6.87813e+06	3	0.4097	1.6246	0.1136	MQ	q	I
226	4104_ML_FinalNorm	AR-22Y-0060DHT	O14818	PSMA7	Proteasome subunit alpha type-7 (Proteasome subunit RC6-1) (Proteasome subunit XAPC7)	0.918004	1.2E+07|1.1E+07|9.1E+06	3.27281e+07	1.09094e+07	3	9.4E+06|5.6E+06|5.7E+06	2.06344e+07	6.87813e+06	3	0.3407	1.58609	0.1433	MQ	q	I
227	4104_ML_FinalNorm	AR-WT-0000DHT	O14818	PSMA7	Proteasome subunit alpha type-7 (Proteasome subunit RC6-1) (Proteasome subunit XAPC7)	0.918004	9.3E+06|7.3E+06|9.8E+06	2.638e+07	8.79332e+06	3	9.4E+06|5.6E+06|5.7E+06	2.06344e+07	6.87813e+06	3	0.1268	1.27845	0.2507	MQ	q	I
228	4104_ML_FinalNorm	AR-WT-0060DHT	O14818	PSMA7	Proteasome subunit alpha type-7 (Proteasome subunit RC6-1) (Proteasome subunit XAPC7)	0.918004	5.1E+06|5.2E+06|5.3E+06	1.56295e+07	5.20982e+06	3	9.4E+06|5.6E+06|5.7E+06	2.06344e+07	6.87813e+06	3	0.0304	0.757447	0.3706	MQ	q	I
229	4104_ML_FinalNorm	AR-22Y-0000DHT	O14828	SCAMP3	Secretory carrier-associated membrane protein 3 (Secretory carrier membrane protein 3)	0.727668	2.0E+07|1.6E+07|1.3E+07	4.87768e+07	1.62589e+07	3	1.7E+06|4.3E+06|3.4E+06	9.37228e+06	3.12409e+06	3	0.9933	5.20437	0.0003	MQ	q	I
230	4104_ML_FinalNorm	AR-22Y-0060DHT	O14828	SCAMP3	Secretory carrier-associated membrane protein 3 (Secretory carrier membrane protein 3)	0.727668	3.7E+07|3.2E+07|3.5E+07	1.03545e+08	3.45148e+07	3	1.7E+06|4.3E+06|3.4E+06	9.37228e+06	3.12409e+06	3	1	11.048	0	MQ	q	I
231	4104_ML_FinalNorm	AR-WT-0000DHT	O14828	SCAMP3	Secretory carrier-associated membrane protein 3 (Secretory carrier membrane protein 3)	0.727668	1.4E+07|1.2E+07|1.2E+07	3.82637e+07	1.27546e+07	3	1.7E+06|4.3E+06|3.4E+06	9.37228e+06	3.12409e+06	3	0.9765	4.08264	0.0012	MQ	q	I
232	4104_ML_FinalNorm	AR-WT-0060DHT	O14828	SCAMP3	Secretory carrier-associated membrane protein 3 (Secretory carrier membrane protein 3)	0.727668	1.9E+07|2.0E+07|1.8E+07	5.67134e+07	1.89045e+07	3	1.7E+06|4.3E+06|3.4E+06	9.37228e+06	3.12409e+06	3	0.9991	6.05118	0	MQ	q	I
233	4104_ML_FinalNorm	AR-22Y-0000DHT	O14880	MGST3	Microsomal glutathione S-transferase 3 (Microsomal GST-3) (Glutathione peroxidase MGST3) (EC 1.11.1.-) (LTC4 synthase MGST3) (EC 4.4.1.20) (Microsomal glutathione S-transferase III) (Microsomal GST-III)	0.574891	9.2E+06|1.2E+07|6.3E+06	2.71067e+07	9.03556e+06	3	8.6E+03|7.4E+03|7.2E+03	23230.1	7743.36	3	1	1166.88	0	MQ	q	I
234	4104_ML_FinalNorm	AR-22Y-0060DHT	O14880	MGST3	Microsomal glutathione S-transferase 3 (Microsomal GST-3) (Glutathione peroxidase MGST3) (EC 1.11.1.-) (LTC4 synthase MGST3) (EC 4.4.1.20) (Microsomal glutathione S-transferase III) (Microsomal GST-III)	0.574891	3.6E+07|3.3E+07|2.2E+07	9.07501e+07	3.025e+07	3	8.6E+03|7.4E+03|7.2E+03	23230.1	7743.36	3	1	3906.58	0	MQ	q	I
235	4104_ML_FinalNorm	AR-WT-0000DHT	O14880	MGST3	Microsomal glutathione S-transferase 3 (Microsomal GST-3) (Glutathione peroxidase MGST3) (EC 1.11.1.-) (LTC4 synthase MGST3) (EC 4.4.1.20) (Microsomal glutathione S-transferase III) (Microsomal GST-III)	0.574891	2.5E+06|1.6E+06|1.9E+06	5.96549e+06	1.9885e+06	3	8.6E+03|7.4E+03|7.2E+03	23230.1	7743.36	3	1	256.8	0	MQ	q	I
236	4104_ML_FinalNorm	AR-WT-0060DHT	O14880	MGST3	Microsomal glutathione S-transferase 3 (Microsomal GST-3) (Glutathione peroxidase MGST3) (EC 1.11.1.-) (LTC4 synthase MGST3) (EC 4.4.1.20) (Microsomal glutathione S-transferase III) (Microsomal GST-III)	0.574891	3.3E+06|2.2E+06|3.4E+06	8.96655e+06	2.98885e+06	3	8.6E+03|7.4E+03|7.2E+03	23230.1	7743.36	3	1	385.989	0	MQ	q	I
237	4104_ML_FinalNorm	AR-22Y-0000DHT	O14908	GIPC1	PDZ domain-containing protein GIPC1 (GAIP C-terminus-interacting protein) (RGS-GAIP-interacting protein) (RGS19-interacting protein 1) (Synectin) (Tax interaction protein 2) (TIP-2)	0.594154	2.4E+06|2.3E+06|NAN	4.69744e+06	2.34872e+06	3	4.0E+06|3.2E+06|3.8E+06	1.09632e+07	3.65439e+06	3	0.0072	0.642711	0.5233	MQ	q	I
238	4104_ML_FinalNorm	AR-WT-0000DHT	O14929	HAT1	Histone acetyltransferase type B catalytic subunit (EC 2.3.1.48) (Histone acetyltransferase 1)	0.826347	1.4E+06|NAN|NAN	1.37904e+06	1.37904e+06	3	NAN|9.8E+05|2.0E+06	2.97453e+06	1.48726e+06	3	0.031	0.927232	0.3685	MQ	q	I
239	4104_ML_FinalNorm	AR-WT-0060DHT	O14929	HAT1	Histone acetyltransferase type B catalytic subunit (EC 2.3.1.48) (Histone acetyltransferase 1)	0.826347	NAN|6.0E+05|NAN	600120	600120	3	NAN|9.8E+05|2.0E+06	2.97453e+06	1.48726e+06	3	0.0053	0.403506	0.5421	MQ	q	I
240	4104_ML_FinalNorm	AR-22Y-0000DHT	O14974	PPP1R12A	Protein phosphatase 1 regulatory subunit 12A (Myosin phosphatase-targeting subunit 1) (Myosin phosphatase target subunit 1) (Protein phosphatase myosin-binding subunit)	0.892639	NAN|NAN|2.5E+06	2.50422e+06	2.50422e+06	3	1.7E+07|1.7E+07|1.9E+07	5.31944e+07	1.77315e+07	3	0.0003	0.14123	0.6208	MQ	q	I
241	4104_ML_FinalNorm	AR-22Y-0060DHT	O14974	PPP1R12A	Protein phosphatase 1 regulatory subunit 12A (Myosin phosphatase-targeting subunit 1) (Myosin phosphatase target subunit 1) (Protein phosphatase myosin-binding subunit)	0.892639	NAN|NAN|2.8E+06	2.8425e+06	2.8425e+06	3	1.7E+07|1.7E+07|1.9E+07	5.31944e+07	1.77315e+07	3	0.0005	0.160308	0.6148	MQ	q	I
242	4104_ML_FinalNorm	AR-WT-0000DHT	O14974	PPP1R12A	Protein phosphatase 1 regulatory subunit 12A (Myosin phosphatase-targeting subunit 1) (Myosin phosphatase target subunit 1) (Protein phosphatase myosin-binding subunit)	0.892639	2.6E+07|3.3E+07|2.3E+07	8.20169e+07	2.7339e+07	3	1.7E+07|1.7E+07|1.9E+07	5.31944e+07	1.77315e+07	3	0.5625	1.54183	0.0826	MQ	q	I
243	4104_ML_FinalNorm	AR-WT-0060DHT	O14974	PPP1R12A	Protein phosphatase 1 regulatory subunit 12A (Myosin phosphatase-targeting subunit 1) (Myosin phosphatase target subunit 1) (Protein phosphatase myosin-binding subunit)	0.892639	1.7E+07|2.3E+07|1.8E+07	5.83903e+07	1.94634e+07	3	1.7E+07|1.7E+07|1.9E+07	5.31944e+07	1.77315e+07	3	0.0853	1.09768	0.2774	MQ	q	I
244	4104_ML_FinalNorm	AR-22Y-0000DHT	O14979	HNRNPDL	Heterogeneous nuclear ribonucleoprotein D-like (hnRNP D-like) (hnRNP DL) (AU-rich element RNA-binding factor) (JKT41-binding protein) (Protein laAUF1)	0.941871	7.4E+07|9.8E+07|1.1E+08	2.8008e+08	9.336e+07	3	9.9E+06|1.2E+07|1.2E+07	3.38526e+07	1.12842e+07	3	1	8.27351	0	MQ	q	I
245	4104_ML_FinalNorm	AR-22Y-0060DHT	O14979	HNRNPDL	Heterogeneous nuclear ribonucleoprotein D-like (hnRNP D-like) (hnRNP DL) (AU-rich element RNA-binding factor) (JKT41-binding protein) (Protein laAUF1)	0.941871	5.4E+07|5.3E+06|6.3E+06	6.54519e+07	2.18173e+07	3	9.9E+06|1.2E+07|1.2E+07	3.38526e+07	1.12842e+07	3	0.3492	1.93344	0.1373	MQ	q	I
246	4104_ML_FinalNorm	AR-WT-0000DHT	O14979	HNRNPDL	Heterogeneous nuclear ribonucleoprotein D-like (hnRNP D-like) (hnRNP DL) (AU-rich element RNA-binding factor) (JKT41-binding protein) (Protein laAUF1)	0.941871	NAN|9.9E+05|1.1E+06	2.06384e+06	1.03192e+06	3	9.9E+06|1.2E+07|1.2E+07	3.38526e+07	1.12842e+07	3	0.0062	0.0914482	0.5331	MQ	q	I
247	4104_ML_FinalNorm	AR-WT-0060DHT	O14979	HNRNPDL	Heterogeneous nuclear ribonucleoprotein D-like (hnRNP D-like) (hnRNP DL) (AU-rich element RNA-binding factor) (JKT41-binding protein) (Protein laAUF1)	0.941871	1.1E+06|1.6E+06|1.5E+06	4.14782e+06	1.38261e+06	3	9.9E+06|1.2E+07|1.2E+07	3.38526e+07	1.12842e+07	3	0.0113	0.122526	0.4882	MQ	q	I
248	4104_ML_FinalNorm	AR-22Y-0000DHT	O14980	XPO1	Exportin-1 (Exp1) (Chromosome region maintenance 1 protein homolog)	0.924257	NAN|8.5E+05|1.5E+07	1.58765e+07	7.93825e+06	3	7.7E+07|7.1E+07|8.0E+07	2.2787e+08	7.59565e+07	3	0.0011	0.10451	0.6013	MQ	q	I
249	4104_ML_FinalNorm	AR-22Y-0060DHT	O14980	XPO1	Exportin-1 (Exp1) (Chromosome region maintenance 1 protein homolog)	0.924257	3.2E+07|3.1E+07|3.4E+07	9.71879e+07	3.2396e+07	3	7.7E+07|7.1E+07|8.0E+07	2.2787e+08	7.59565e+07	3	0.0126	0.426507	0.478	MQ	q	I
250	4104_ML_FinalNorm	AR-WT-0000DHT	O14980	XPO1	Exportin-1 (Exp1) (Chromosome region maintenance 1 protein homolog)	0.924257	6.6E+06|6.5E+06|5.9E+06	1.89886e+07	6.32953e+06	3	7.7E+07|7.1E+07|8.0E+07	2.2787e+08	7.59565e+07	3	0.0004	0.0833309	0.6178	MQ	q	I
251	4104_ML_FinalNorm	AR-WT-0060DHT	O14980	XPO1	Exportin-1 (Exp1) (Chromosome region maintenance 1 protein homolog)	0.924257	7.7E+06|5.9E+06|9.0E+06	2.26283e+07	7.54276e+06	3	7.7E+07|7.1E+07|8.0E+07	2.2787e+08	7.59565e+07	3	0.0007	0.0993037	0.6098	MQ	q	I
252	4104_ML_FinalNorm	AR-22Y-0000DHT	O15014	ZNF609	Zinc finger protein 609	0.676648	1.1E+07|1.3E+07|1.5E+07	3.89919e+07	1.29973e+07	3	1.6E+06|4.1E+06|4.3E+06	9.97849e+06	3.32616e+06	3	0.8354	3.90759	0.0107	MQ	q	I
253	4104_ML_FinalNorm	AR-22Y-0060DHT	O15014	ZNF609	Zinc finger protein 609	0.676648	1.2E+08|1.2E+08|1.3E+08	3.61612e+08	1.20537e+08	3	1.6E+06|4.1E+06|4.3E+06	9.97849e+06	3.32616e+06	3	1	36.2391	0	MQ	q	I
254	4104_ML_FinalNorm	AR-WT-0000DHT	O15014	ZNF609	Zinc finger protein 609	0.676648	1.2E+07|1.1E+07|1.8E+07	4.09185e+07	1.36395e+07	3	1.6E+06|4.1E+06|4.3E+06	9.97849e+06	3.32616e+06	3	0.8347	4.10067	0.0108	MQ	q	I
255	4104_ML_FinalNorm	AR-WT-0060DHT	O15014	ZNF609	Zinc finger protein 609	0.676648	1.1E+08|1.1E+08|1.0E+08	3.23558e+08	1.07853e+08	3	1.6E+06|4.1E+06|4.3E+06	9.97849e+06	3.32616e+06	3	1	32.4256	0	MQ	q	I
256	4104_ML_FinalNorm	AR-22Y-0000DHT	O15027	SEC16A	Protein transport protein Sec16A (SEC16 homolog A) (p250)	0.857509	2.7E+08|2.8E+08|2.5E+08	7.95666e+08	2.65222e+08	3	7.0E+07|5.8E+07|6.4E+07	1.92096e+08	6.40319e+07	3	1	4.14203	0	MQ	q	I
257	4104_ML_FinalNorm	AR-22Y-0060DHT	O15027	SEC16A	Protein transport protein Sec16A (SEC16 homolog A) (p250)	0.857509	1.8E+08|1.7E+08|1.9E+08	5.36461e+08	1.7882e+08	3	7.0E+07|5.8E+07|6.4E+07	1.92096e+08	6.40319e+07	3	1	2.79268	0	MQ	q	I
258	4104_ML_FinalNorm	AR-WT-0000DHT	O15027	SEC16A	Protein transport protein Sec16A (SEC16 homolog A) (p250)	0.857509	3.2E+07|4.0E+07|3.9E+07	1.10808e+08	3.69359e+07	3	7.0E+07|5.8E+07|6.4E+07	1.92096e+08	6.40319e+07	3	0.0129	0.576836	0.4759	MQ	q	I
259	4104_ML_FinalNorm	AR-WT-0060DHT	O15027	SEC16A	Protein transport protein Sec16A (SEC16 homolog A) (p250)	0.857509	4.1E+07|5.3E+07|5.9E+07	1.52351e+08	5.07836e+07	3	7.0E+07|5.8E+07|6.4E+07	1.92096e+08	6.40319e+07	3	0.0223	0.793099	0.4133	MQ	q	I
260	4104_ML_FinalNorm	AR-22Y-0000DHT	O15042	U2SURP	U2 snRNP-associated SURP motif-containing protein (140 kDa Ser/Arg-rich domain protein) (U2-associated protein SR140)	0.952922	8.7E+06|2.0E+07|2.1E+07	4.97757e+07	1.65919e+07	3	4.3E+07|4.8E+07|4.9E+07	1.38903e+08	4.6301e+07	3	0.0028	0.358348	0.5734	MQ	q	I
261	4104_ML_FinalNorm	AR-22Y-0060DHT	O15042	U2SURP	U2 snRNP-associated SURP motif-containing protein (140 kDa Ser/Arg-rich domain protein) (U2-associated protein SR140)	0.952922	1.5E+07|1.9E+07|2.6E+07	6.01737e+07	2.00579e+07	3	4.3E+07|4.8E+07|4.9E+07	1.38903e+08	4.6301e+07	3	0.0042	0.433206	0.5547	MQ	q	I
262	4104_ML_FinalNorm	AR-WT-0000DHT	O15042	U2SURP	U2 snRNP-associated SURP motif-containing protein (140 kDa Ser/Arg-rich domain protein) (U2-associated protein SR140)	0.952922	1.5E+07|1.7E+07|2.0E+07	5.17995e+07	1.72665e+07	3	4.3E+07|4.8E+07|4.9E+07	1.38903e+08	4.6301e+07	3	0.0025	0.372918	0.579	MQ	q	I
263	4104_ML_FinalNorm	AR-WT-0060DHT	O15042	U2SURP	U2 snRNP-associated SURP motif-containing protein (140 kDa Ser/Arg-rich domain protein) (U2-associated protein SR140)	0.952922	2.0E+07|1.9E+07|2.3E+07	6.21649e+07	2.07216e+07	3	4.3E+07|4.8E+07|4.9E+07	1.38903e+08	4.6301e+07	3	0.0042	0.447541	0.5547	MQ	q	I
264	4104_ML_FinalNorm	AR-22Y-0000DHT	O15056	SYNJ2	Synaptojanin-2 (EC 3.1.3.36) (Synaptic inositol 1,4,5-trisphosphate 5-phosphatase 2)	0.541857	1.2E+08|1.8E+08|2.2E+08	5.14244e+08	1.71415e+08	3	5.9E+07|5.7E+07|5.7E+07	1.72292e+08	5.74306e+07	3	0.9999	2.98473	0	MQ	q	I
265	4104_ML_FinalNorm	AR-22Y-0060DHT	O15056	SYNJ2	Synaptojanin-2 (EC 3.1.3.36) (Synaptic inositol 1,4,5-trisphosphate 5-phosphatase 2)	0.541857	1.4E+08|1.1E+08|3.7E+08	6.24677e+08	2.08226e+08	3	5.9E+07|5.7E+07|5.7E+07	1.72292e+08	5.74306e+07	3	0.9986	3.62569	0	MQ	q	I
266	4104_ML_FinalNorm	AR-WT-0000DHT	O15056	SYNJ2	Synaptojanin-2 (EC 3.1.3.36) (Synaptic inositol 1,4,5-trisphosphate 5-phosphatase 2)	0.541857	1.6E+08|1.7E+08|1.5E+08	4.89989e+08	1.6333e+08	3	5.9E+07|5.7E+07|5.7E+07	1.72292e+08	5.74306e+07	3	1	2.84395	0	MQ	q	I
267	4104_ML_FinalNorm	AR-WT-0060DHT	O15056	SYNJ2	Synaptojanin-2 (EC 3.1.3.36) (Synaptic inositol 1,4,5-trisphosphate 5-phosphatase 2)	0.541857	1.4E+08|1.1E+08|1.4E+08	3.8616e+08	1.2872e+08	3	5.9E+07|5.7E+07|5.7E+07	1.72292e+08	5.74306e+07	3	0.9989	2.24131	0	MQ	q	I
268	4104_ML_FinalNorm	AR-22Y-0060DHT	O15061	SYNM	Synemin (Desmuslin)	0.800185	5.3E+05|NAN|NAN	525681	525681	3	2.1E+05|9.0E+05|5.4E+05	1.64427e+06	548090	3	0.0464	0.959114	0.3273	MQ	q	I
269	4104_ML_FinalNorm	AR-WT-0000DHT	O15061	SYNM	Synemin (Desmuslin)	0.800185	2.7E+06|9.9E+05|1.1E+06	4.81622e+06	1.60541e+06	3	2.1E+05|9.0E+05|5.4E+05	1.64427e+06	548090	3	0.5711	2.92909	0.0801	MQ	q	I
270	4104_ML_FinalNorm	AR-WT-0060DHT	O15061	SYNM	Synemin (Desmuslin)	0.800185	NAN|NAN|4.6E+05	464815	464815	3	2.1E+05|9.0E+05|5.4E+05	1.64427e+06	548090	3	0.0381	0.848063	0.3454	MQ	q	I
271	4104_ML_FinalNorm	AR-22Y-0000DHT	O15067	PFAS	Phosphoribosylformylglycinamidine synthase (FGAM synthase) (FGAMS) (EC 6.3.5.3) (Formylglycinamide ribonucleotide amidotransferase) (FGAR amidotransferase) (FGAR-AT) (Formylglycinamide ribotide amidotransferase)	0.841723	2.3E+06|9.9E+06|1.2E+07	2.42217e+07	8.07391e+06	3	NAN|4.6E+05|NAN	463411	463411	3	1	17.4228	0	MQ	q	I
272	4104_ML_FinalNorm	AR-22Y-0060DHT	O15067	PFAS	Phosphoribosylformylglycinamidine synthase (FGAM synthase) (FGAMS) (EC 6.3.5.3) (Formylglycinamide ribonucleotide amidotransferase) (FGAR amidotransferase) (FGAR-AT) (Formylglycinamide ribotide amidotransferase)	0.841723	1.9E+06|1.3E+06|1.9E+06	5.12502e+06	1.70834e+06	3	NAN|4.6E+05|NAN	463411	463411	3	1	3.68645	0	MQ	q	I
273	4104_ML_FinalNorm	AR-WT-0000DHT	O15084	ANKRD28	Serine/threonine-protein phosphatase 6 regulatory ankyrin repeat subunit A (PP6-ARS-A) (Serine/threonine-protein phosphatase 6 regulatory subunit ARS-A) (Ankyrin repeat domain-containing protein 28) (Phosphatase interactor targeting protein hnRNP K) (PITK)	0.669103	1.2E+07|1.1E+07|1.2E+07	3.52271e+07	1.17424e+07	3	7.6E+06|5.3E+06|8.2E+06	2.1056e+07	7.01865e+06	3	0.5563	1.67302	0.0844	MQ	q	I
274	4104_ML_FinalNorm	AR-WT-0060DHT	O15084	ANKRD28	Serine/threonine-protein phosphatase 6 regulatory ankyrin repeat subunit A (PP6-ARS-A) (Serine/threonine-protein phosphatase 6 regulatory subunit ARS-A) (Ankyrin repeat domain-containing protein 28) (Phosphatase interactor targeting protein hnRNP K) (PITK)	0.669103	6.3E+06|5.7E+06|6.7E+06	1.86663e+07	6.22209e+06	3	7.6E+06|5.3E+06|8.2E+06	2.1056e+07	7.01865e+06	3	0.0323	0.886508	0.3637	MQ	q	I
275	4104_ML_FinalNorm	AR-22Y-0000DHT	O15143	ARPC1B	Actin-related protein 2/3 complex subunit 1B (Arp2/3 complex 41 kDa subunit) (p41-ARC)	0.620982	2.0E+07|1.7E+07|2.3E+07	5.99847e+07	1.99949e+07	3	7.5E+06|9.3E+06|9.0E+06	2.57631e+07	8.5877e+06	3	0.9999	2.32832	0	MQ	q	I
276	4104_ML_FinalNorm	AR-22Y-0060DHT	O15143	ARPC1B	Actin-related protein 2/3 complex subunit 1B (Arp2/3 complex 41 kDa subunit) (p41-ARC)	0.620982	NAN|3.1E+06|3.4E+06	6.51085e+06	3.25542e+06	3	7.5E+06|9.3E+06|9.0E+06	2.57631e+07	8.5877e+06	3	0.0017	0.37908	0.5923	MQ	q	I
277	4104_ML_FinalNorm	AR-WT-0000DHT	O15143	ARPC1B	Actin-related protein 2/3 complex subunit 1B (Arp2/3 complex 41 kDa subunit) (p41-ARC)	0.620982	4.8E+06|3.7E+06|4.3E+06	1.28082e+07	4.2694e+06	3	7.5E+06|9.3E+06|9.0E+06	2.57631e+07	8.5877e+06	3	0.0057	0.497153	0.5379	MQ	q	I
278	4104_ML_FinalNorm	AR-WT-0060DHT	O15143	ARPC1B	Actin-related protein 2/3 complex subunit 1B (Arp2/3 complex 41 kDa subunit) (p41-ARC)	0.620982	6.3E+06|5.4E+06|6.5E+06	1.82708e+07	6.09028e+06	3	7.5E+06|9.3E+06|9.0E+06	2.57631e+07	8.5877e+06	3	0.0136	0.709186	0.4707	MQ	q	I
279	4104_ML_FinalNorm	AR-22Y-0000DHT	O15144	ARPC2	Actin-related protein 2/3 complex subunit 2 (Arp2/3 complex 34 kDa subunit) (p34-ARC)	0.74931	5.3E+07|4.8E+07|5.5E+07	1.56691e+08	5.22303e+07	3	1.9E+07|2.0E+07|2.0E+07	5.94938e+07	1.98313e+07	3	1	2.63374	0	MQ	q	I
280	4104_ML_FinalNorm	AR-22Y-0060DHT	O15144	ARPC2	Actin-related protein 2/3 complex subunit 2 (Arp2/3 complex 34 kDa subunit) (p34-ARC)	0.74931	1.9E+07|1.6E+07|1.7E+07	5.19727e+07	1.73242e+07	3	1.9E+07|2.0E+07|2.0E+07	5.94938e+07	1.98313e+07	3	0.0213	0.873582	0.42	MQ	q	I
281	4104_ML_FinalNorm	AR-WT-0000DHT	O15144	ARPC2	Actin-related protein 2/3 complex subunit 2 (Arp2/3 complex 34 kDa subunit) (p34-ARC)	0.74931	1.5E+07|1.4E+07|5.4E+06	3.45263e+07	1.15088e+07	3	1.9E+07|2.0E+07|2.0E+07	5.94938e+07	1.98313e+07	3	0.0104	0.580336	0.4945	MQ	q	I
282	4104_ML_FinalNorm	AR-WT-0060DHT	O15144	ARPC2	Actin-related protein 2/3 complex subunit 2 (Arp2/3 complex 34 kDa subunit) (p34-ARC)	0.74931	5.7E+06|1.3E+07|1.2E+07	3.01999e+07	1.00666e+07	3	1.9E+07|2.0E+07|2.0E+07	5.94938e+07	1.98313e+07	3	0.0072	0.507615	0.5233	MQ	q	I
283	4104_ML_FinalNorm	AR-22Y-0000DHT	O15160	POLR1C	DNA-directed RNA polymerases I and III subunit RPAC1 (DNA-directed RNA polymerase I subunit C) (RNA polymerases I and III subunit AC1) (AC40) (DNA-directed RNA polymerases I and III 40 kDa polypeptide) (RPA40) (RPA39) (RPC40)	0.822196	1.3E+07|2.0E+07|1.9E+07	5.10198e+07	1.70066e+07	3	8.0E+06|4.7E+06|4.5E+06	1.72253e+07	5.74177e+06	3	0.9274	2.96191	0.0044	MQ	q	I
284	4104_ML_FinalNorm	AR-22Y-0060DHT	O15160	POLR1C	DNA-directed RNA polymerases I and III subunit RPAC1 (DNA-directed RNA polymerase I subunit C) (RNA polymerases I and III subunit AC1) (AC40) (DNA-directed RNA polymerases I and III 40 kDa polypeptide) (RPA40) (RPA39) (RPC40)	0.822196	9.9E+06|1.1E+07|1.3E+07	3.40455e+07	1.13485e+07	3	8.0E+06|4.7E+06|4.5E+06	1.72253e+07	5.74177e+06	3	0.5877	1.97648	0.0775	MQ	q	I
285	4104_ML_FinalNorm	AR-WT-0000DHT	O15160	POLR1C	DNA-directed RNA polymerases I and III subunit RPAC1 (DNA-directed RNA polymerase I subunit C) (RNA polymerases I and III subunit AC1) (AC40) (DNA-directed RNA polymerases I and III 40 kDa polypeptide) (RPA40) (RPA39) (RPC40)	0.822196	2.1E+06|3.0E+06|1.7E+06	6.78364e+06	2.26121e+06	3	8.0E+06|4.7E+06|4.5E+06	1.72253e+07	5.74177e+06	3	0.0263	0.393818	0.391	MQ	q	I
286	4104_ML_FinalNorm	AR-WT-0060DHT	O15160	POLR1C	DNA-directed RNA polymerases I and III subunit RPAC1 (DNA-directed RNA polymerase I subunit C) (RNA polymerases I and III subunit AC1) (AC40) (DNA-directed RNA polymerases I and III 40 kDa polypeptide) (RPA40) (RPA39) (RPC40)	0.822196	7.3E+05|2.7E+06|2.1E+06	5.56737e+06	1.85579e+06	3	8.0E+06|4.7E+06|4.5E+06	1.72253e+07	5.74177e+06	3	0.0205	0.323209	0.4238	MQ	q	I
287	4104_ML_FinalNorm	AR-WT-0000DHT	O15164	TRIM24	Transcription intermediary factor 1-alpha (TIF1-alpha) (EC 2.3.2.27) (E3 ubiquitin-protein ligase TRIM24) (RING finger protein 82) (RING-type E3 ubiquitin transferase TIF1-alpha) (Tripartite motif-containing protein 24)	0.689828	8.7E+06|8.8E+06|9.0E+06	2.64557e+07	8.81856e+06	3	8.7E+05|2.4E+06|1.3E+06	4.58715e+06	1.52905e+06	3	0.9909	5.76735	0.0004	MQ	q	I
288	4104_ML_FinalNorm	AR-WT-0060DHT	O15164	TRIM24	Transcription intermediary factor 1-alpha (TIF1-alpha) (EC 2.3.2.27) (E3 ubiquitin-protein ligase TRIM24) (RING finger protein 82) (RING-type E3 ubiquitin transferase TIF1-alpha) (Tripartite motif-containing protein 24)	0.689828	7.6E+07|6.7E+07|7.6E+07	2.18591e+08	7.28637e+07	3	8.7E+05|2.4E+06|1.3E+06	4.58715e+06	1.52905e+06	3	1	47.653	0	MQ	q	I
289	4104_ML_FinalNorm	AR-22Y-0000DHT	O15212	PFDN6	Prefoldin subunit 6 (Protein Ke2)	0.715444	NAN|NAN|9.5E+05	954246	954246	3	5.1E+06|4.9E+06|5.3E+06	1.54244e+07	5.14146e+06	3	0.0016	0.185598	0.5937	MQ	q	I
290	4104_ML_FinalNorm	AR-WT-0000DHT	O15212	PFDN6	Prefoldin subunit 6 (Protein Ke2)	0.715444	2.8E+07|3.1E+07|2.8E+07	8.69952e+07	2.89984e+07	3	5.1E+06|4.9E+06|5.3E+06	1.54244e+07	5.14146e+06	3	1	5.64011	0	MQ	q	I
291	4104_ML_FinalNorm	AR-WT-0060DHT	O15212	PFDN6	Prefoldin subunit 6 (Protein Ke2)	0.715444	1.6E+07|1.7E+07|1.4E+07	4.66842e+07	1.55614e+07	3	5.1E+06|4.9E+06|5.3E+06	1.54244e+07	5.14146e+06	3	1	3.02665	0	MQ	q	I
292	4104_ML_FinalNorm	AR-22Y-0000DHT	O15226	NKRF	NF-kappa-B-repressing factor (NFkB-repressing factor) (Protein ITBA4) (Transcription factor NRF)	0.861113	NAN|2.9E+06|3.6E+06	6.50783e+06	3.25391e+06	3	5.9E+06|6.8E+06|5.3E+06	1.80403e+07	6.01343e+06	3	0.0048	0.541108	0.5481	MQ	q	I
293	4104_ML_FinalNorm	AR-22Y-0060DHT	O15226	NKRF	NF-kappa-B-repressing factor (NFkB-repressing factor) (Protein ITBA4) (Transcription factor NRF)	0.861113	NAN|2.9E+06|2.0E+06	4.89317e+06	2.44659e+06	3	5.9E+06|6.8E+06|5.3E+06	1.80403e+07	6.01343e+06	3	0.0023	0.406854	0.5825	MQ	q	I
294	4104_ML_FinalNorm	AR-WT-0000DHT	O15226	NKRF	NF-kappa-B-repressing factor (NFkB-repressing factor) (Protein ITBA4) (Transcription factor NRF)	0.861113	1.3E+06|2.2E+06|1.5E+06	5.01981e+06	1.67327e+06	3	5.9E+06|6.8E+06|5.3E+06	1.80403e+07	6.01343e+06	3	0.0011	0.278256	0.6013	MQ	q	I
295	4104_ML_FinalNorm	AR-WT-0060DHT	O15226	NKRF	NF-kappa-B-repressing factor (NFkB-repressing factor) (Protein ITBA4) (Transcription factor NRF)	0.861113	1.6E+06|6.3E+05|2.4E+06	4.62316e+06	1.54105e+06	3	5.9E+06|6.8E+06|5.3E+06	1.80403e+07	6.01343e+06	3	0.0013	0.256269	0.5984	MQ	q	I
296	4104_ML_FinalNorm	AR-22Y-0000DHT	O15231	ZNF185	Zinc finger protein 185 (LIM domain protein ZNF185) (P1-A)	0.412851	1.6E+06|4.9E+06|4.9E+06	1.14791e+07	3.82636e+06	3	2.4E+08|2.5E+08|2.5E+08	7.4784e+08	2.4928e+08	3	0.0003	0.0153496	0.6208	MQ	q	I
297	4104_ML_FinalNorm	AR-22Y-0060DHT	O15231	ZNF185	Zinc finger protein 185 (LIM domain protein ZNF185) (P1-A)	0.412851	1.2E+07|4.0E+07|1.0E+07	6.15504e+07	2.05168e+07	3	2.4E+08|2.5E+08|2.5E+08	7.4784e+08	2.4928e+08	3	0.004	0.0823042	0.5576	MQ	q	I
298	4104_ML_FinalNorm	AR-WT-0000DHT	O15231	ZNF185	Zinc finger protein 185 (LIM domain protein ZNF185) (P1-A)	0.412851	1.1E+08|1.2E+08|1.1E+08	3.39826e+08	1.13275e+08	3	2.4E+08|2.5E+08|2.5E+08	7.4784e+08	2.4928e+08	3	0.0216	0.45441	0.4179	MQ	q	I
299	4104_ML_FinalNorm	AR-WT-0060DHT	O15231	ZNF185	Zinc finger protein 185 (LIM domain protein ZNF185) (P1-A)	0.412851	8.2E+07|8.2E+07|8.2E+07	2.46232e+08	8.20775e+07	3	2.4E+08|2.5E+08|2.5E+08	7.4784e+08	2.4928e+08	3	0.017	0.329258	0.4457	MQ	q	I
300	4104_ML_FinalNorm	AR-22Y-0000DHT	O15258	RER1	Protein RER1	0.308233	3.2E+07|3.5E+07|3.4E+07	1.01484e+08	3.38281e+07	3	4.8E+06|7.3E+06|6.0E+06	1.81428e+07	6.04761e+06	3	1	5.59363	0	MQ	q	I
301	4104_ML_FinalNorm	AR-22Y-0060DHT	O15258	RER1	Protein RER1	0.308233	4.6E+07|5.0E+07|5.0E+07	1.45696e+08	4.85655e+07	3	4.8E+06|7.3E+06|6.0E+06	1.81428e+07	6.04761e+06	3	1	8.03052	0	MQ	q	I
302	4104_ML_FinalNorm	AR-WT-0000DHT	O15258	RER1	Protein RER1	0.308233	8.8E+06|8.1E+06|8.7E+06	2.56542e+07	8.55141e+06	3	4.8E+06|7.3E+06|6.0E+06	1.81428e+07	6.04761e+06	3	0.2371	1.41401	0.2045	MQ	q	I
303	4104_ML_FinalNorm	AR-WT-0060DHT	O15258	RER1	Protein RER1	0.308233	9.5E+06|9.9E+06|9.2E+06	2.85602e+07	9.52006e+06	3	4.8E+06|7.3E+06|6.0E+06	1.81428e+07	6.04761e+06	3	0.4916	1.57419	0.0979	MQ	q	I
304	4104_ML_FinalNorm	AR-22Y-0000DHT	O15260	SURF4	Surfeit locus protein 4	0.81708	NAN|1.5E+06|1.1E+06	2.66145e+06	1.33072e+06	3	5.2E+03|8.8E+03|1.0E+04	24509.8	8169.93	3	0.6667	162.881	0.0404	MQ	q	I
305	4104_ML_FinalNorm	AR-22Y-0060DHT	O15260	SURF4	Surfeit locus protein 4	0.81708	2.5E+07|2.9E+07|2.3E+07	7.70896e+07	2.56965e+07	3	5.2E+03|8.8E+03|1.0E+04	24509.8	8169.93	3	1	3145.26	0	MQ	q	I
306	4104_ML_FinalNorm	AR-WT-0000DHT	O15260	SURF4	Surfeit locus protein 4	0.81708	1.3E+06|6.2E+06|1.4E+06	8.95692e+06	2.98564e+06	3	5.2E+03|8.8E+03|1.0E+04	24509.8	8169.93	3	1	365.442	0	MQ	q	I
307	4104_ML_FinalNorm	AR-WT-0060DHT	O15260	SURF4	Surfeit locus protein 4	0.81708	6.1E+06|2.3E+06|8.7E+06	1.70943e+07	5.69808e+06	3	5.2E+03|8.8E+03|1.0E+04	24509.8	8169.93	3	1	697.446	0	MQ	q	I
308	4104_ML_FinalNorm	AR-22Y-0000DHT	O15294	OGT	UDP-N-acetylglucosamine--peptide N-acetylglucosaminyltransferase 110 kDa subunit (EC 2.4.1.255) (O-GlcNAc transferase subunit p110) (O-linked N-acetylglucosamine transferase 110 kDa subunit) (OGT)	0.891493	NAN|2.7E+06|NAN	2.66322e+06	2.66322e+06	3	3.0E+06|3.7E+06|9.0E+05	7.67934e+06	2.55978e+06	3	0.0551	1.04041	0.3136	MQ	q	I
309	4104_ML_FinalNorm	AR-22Y-0060DHT	O15294	OGT	UDP-N-acetylglucosamine--peptide N-acetylglucosaminyltransferase 110 kDa subunit (EC 2.4.1.255) (O-GlcNAc transferase subunit p110) (O-linked N-acetylglucosamine transferase 110 kDa subunit) (OGT)	0.891493	2.5E+06|5.0E+06|6.2E+06	1.36777e+07	4.55924e+06	3	3.0E+06|3.7E+06|9.0E+05	7.67934e+06	2.55978e+06	3	0.3589	1.78111	0.1323	MQ	q	I
310	4104_ML_FinalNorm	AR-WT-0000DHT	O15294	OGT	UDP-N-acetylglucosamine--peptide N-acetylglucosaminyltransferase 110 kDa subunit (EC 2.4.1.255) (O-GlcNAc transferase subunit p110) (O-linked N-acetylglucosamine transferase 110 kDa subunit) (OGT)	0.891493	4.2E+05|2.1E+06|1.6E+06	4.12173e+06	1.37391e+06	3	3.0E+06|3.7E+06|9.0E+05	7.67934e+06	2.55978e+06	3	0.0636	0.53673	0.3	MQ	q	I
311	4104_ML_FinalNorm	AR-WT-0060DHT	O15294	OGT	UDP-N-acetylglucosamine--peptide N-acetylglucosaminyltransferase 110 kDa subunit (EC 2.4.1.255) (O-GlcNAc transferase subunit p110) (O-linked N-acetylglucosamine transferase 110 kDa subunit) (OGT)	0.891493	4.0E+06|4.0E+06|5.9E+06	1.38977e+07	4.63256e+06	3	3.0E+06|3.7E+06|9.0E+05	7.67934e+06	2.55978e+06	3	0.3653	1.80975	0.129	MQ	q	I
312	4104_ML_FinalNorm	AR-WT-0000DHT	O15357	INPPL1	Phosphatidylinositol 3,4,5-trisphosphate 5-phosphatase 2 (EC 3.1.3.86) (Inositol polyphosphate phosphatase-like protein 1) (INPPL-1) (Protein 51C) (SH2 domain-containing inositol 5'-phosphatase 2) (SH2 domain-containing inositol phosphatase 2) (SHIP-2)	0.521722	3.9E+06|4.3E+06|4.6E+06	1.28247e+07	4.27489e+06	3	2.9E+06|2.6E+06|2.4E+06	7.88781e+06	2.62927e+06	3	0.8321	1.62589	0.0114	MQ	q	I
313	4104_ML_FinalNorm	AR-WT-0060DHT	O15357	INPPL1	Phosphatidylinositol 3,4,5-trisphosphate 5-phosphatase 2 (EC 3.1.3.86) (Inositol polyphosphate phosphatase-like protein 1) (INPPL-1) (Protein 51C) (SH2 domain-containing inositol 5'-phosphatase 2) (SH2 domain-containing inositol phosphatase 2) (SHIP-2)	0.521722	2.1E+06|3.8E+06|3.7E+06	9.64789e+06	3.21596e+06	3	2.9E+06|2.6E+06|2.4E+06	7.88781e+06	2.62927e+06	3	0.2847	1.22314	0.1885	MQ	q	I
314	4104_ML_FinalNorm	AR-22Y-0000DHT	O15371	EIF3D	Eukaryotic translation initiation factor 3 subunit D (eIF3d) (Eukaryotic translation initiation factor 3 subunit 7) (eIF-3-zeta) (eIF3 p66)	0.905569	2.2E+07|5.3E+07|5.2E+07	1.26985e+08	4.23282e+07	3	3.2E+07|3.4E+07|3.2E+07	9.73826e+07	3.24609e+07	3	0.5824	1.30398	0.0785	MQ	q	I
315	4104_ML_FinalNorm	AR-22Y-0060DHT	O15371	EIF3D	Eukaryotic translation initiation factor 3 subunit D (eIF3d) (Eukaryotic translation initiation factor 3 subunit 7) (eIF-3-zeta) (eIF3 p66)	0.905569	5.8E+07|4.1E+07|5.7E+07	1.5628e+08	5.20934e+07	3	3.2E+07|3.4E+07|3.2E+07	9.73826e+07	3.24609e+07	3	0.6888	1.60481	0.0317	MQ	q	I
316	4104_ML_FinalNorm	AR-WT-0000DHT	O15371	EIF3D	Eukaryotic translation initiation factor 3 subunit D (eIF3d) (Eukaryotic translation initiation factor 3 subunit 7) (eIF-3-zeta) (eIF3 p66)	0.905569	2.0E+07|1.4E+07|1.4E+07	4.78073e+07	1.59358e+07	3	3.2E+07|3.4E+07|3.2E+07	9.73826e+07	3.24609e+07	3	0.0057	0.490922	0.5379	MQ	q	I
317	4104_ML_FinalNorm	AR-WT-0060DHT	O15371	EIF3D	Eukaryotic translation initiation factor 3 subunit D (eIF3d) (Eukaryotic translation initiation factor 3 subunit 7) (eIF-3-zeta) (eIF3 p66)	0.905569	1.2E+07|1.6E+07|2.0E+07	4.7632e+07	1.58773e+07	3	3.2E+07|3.4E+07|3.2E+07	9.73826e+07	3.24609e+07	3	0.0058	0.489122	0.5372	MQ	q	I
318	4104_ML_FinalNorm	AR-22Y-0000DHT	O15372	EIF3H	Eukaryotic translation initiation factor 3 subunit H (eIF3h) (Eukaryotic translation initiation factor 3 subunit 3) (eIF-3-gamma) (eIF3 p40 subunit)	0.902949	1.7E+06|2.6E+06|4.0E+06	8.2957e+06	2.76523e+06	3	5.4E+06|3.9E+06|5.9E+06	1.52232e+07	5.07441e+06	3	0.0226	0.544936	0.4127	MQ	q	I
319	4104_ML_FinalNorm	AR-22Y-0060DHT	O15372	EIF3H	Eukaryotic translation initiation factor 3 subunit H (eIF3h) (Eukaryotic translation initiation factor 3 subunit 3) (eIF-3-gamma) (eIF3 p40 subunit)	0.902949	1.6E+06|2.4E+06|NAN	4.06963e+06	2.03482e+06	3	5.4E+06|3.9E+06|5.9E+06	1.52232e+07	5.07441e+06	3	0.0094	0.400995	0.5031	MQ	q	I
320	4104_ML_FinalNorm	AR-WT-0000DHT	O15372	EIF3H	Eukaryotic translation initiation factor 3 subunit H (eIF3h) (Eukaryotic translation initiation factor 3 subunit 3) (eIF-3-gamma) (eIF3 p40 subunit)	0.902949	1.7E+07|1.7E+07|1.5E+07	4.79949e+07	1.59983e+07	3	5.4E+06|3.9E+06|5.9E+06	1.52232e+07	5.07441e+06	3	1	3.15274	0	MQ	q	I
321	4104_ML_FinalNorm	AR-WT-0060DHT	O15372	EIF3H	Eukaryotic translation initiation factor 3 subunit H (eIF3h) (Eukaryotic translation initiation factor 3 subunit 3) (eIF-3-gamma) (eIF3 p40 subunit)	0.902949	1.6E+07|1.1E+07|1.5E+07	4.27541e+07	1.42514e+07	3	5.4E+06|3.9E+06|5.9E+06	1.52232e+07	5.07441e+06	3	0.9958	2.80848	0.0002	MQ	q	I
322	4104_ML_FinalNorm	AR-22Y-0000DHT	O15379	HDAC3	Histone deacetylase 3 (HD3) (EC 3.5.1.98) (RPD3-2) (SMAP45)	0.559743	NAN|3.6E+06|8.2E+06	1.18587e+07	5.92933e+06	3	1.1E+06|NAN|2.2E+06	3.27818e+06	1.63909e+06	3	0.5816	3.61745	0.0786	MQ	q	I
323	4104_ML_FinalNorm	AR-22Y-0060DHT	O15379	HDAC3	Histone deacetylase 3 (HD3) (EC 3.5.1.98) (RPD3-2) (SMAP45)	0.559743	NAN|1.8E+06|4.6E+06	6.4074e+06	3.2037e+06	3	1.1E+06|NAN|2.2E+06	3.27818e+06	1.63909e+06	3	0.3563	1.95456	0.1338	MQ	q	I
324	4104_ML_FinalNorm	AR-WT-0000DHT	O15379	HDAC3	Histone deacetylase 3 (HD3) (EC 3.5.1.98) (RPD3-2) (SMAP45)	0.559743	NAN|NAN|7.9E+05	790797	790797	3	1.1E+06|NAN|2.2E+06	3.27818e+06	1.63909e+06	3	0.0138	0.48246	0.4694	MQ	q	I
325	4104_ML_FinalNorm	AR-WT-0060DHT	O15379	HDAC3	Histone deacetylase 3 (HD3) (EC 3.5.1.98) (RPD3-2) (SMAP45)	0.559743	1.0E+07|8.3E+06|9.3E+06	2.78583e+07	9.28611e+06	3	1.1E+06|NAN|2.2E+06	3.27818e+06	1.63909e+06	3	0.9995	5.6654	0	MQ	q	I
326	4104_ML_FinalNorm	AR-22Y-0000DHT	O15397	IPO8	Importin-8 (Imp8) (Ran-binding protein 8) (RanBP8)	0.927397	NAN|2.0E+06|NAN	2.047e+06	2.047e+06	3	7.6E+05|2.1E+06|3.1E+06	6.00322e+06	2.00107e+06	3	0.0494	1.02295	0.3218	MQ	q	I
327	4104_ML_FinalNorm	AR-22Y-0060DHT	O15397	IPO8	Importin-8 (Imp8) (Ran-binding protein 8) (RanBP8)	0.927397	NAN|1.3E+06|NAN	1.32751e+06	1.32751e+06	3	7.6E+05|2.1E+06|3.1E+06	6.00322e+06	2.00107e+06	3	0.0234	0.663396	0.4061	MQ	q	I
328	4104_ML_FinalNorm	AR-WT-0000DHT	O15397	IPO8	Importin-8 (Imp8) (Ran-binding protein 8) (RanBP8)	0.927397	5.2E+06|3.1E+06|5.6E+06	1.3928e+07	4.64268e+06	3	7.6E+05|2.1E+06|3.1E+06	6.00322e+06	2.00107e+06	3	0.5003	2.32009	0.096	MQ	q	I
329	4104_ML_FinalNorm	AR-WT-0060DHT	O15397	IPO8	Importin-8 (Imp8) (Ran-binding protein 8) (RanBP8)	0.927397	3.9E+06|6.4E+06|3.7E+06	1.39132e+07	4.63774e+06	3	7.6E+05|2.1E+06|3.1E+06	6.00322e+06	2.00107e+06	3	0.4929	2.31763	0.0977	MQ	q	I
330	4104_ML_FinalNorm	AR-22Y-0000DHT	O15417	TNRC18	Trinucleotide repeat-containing gene 18 protein (Long CAG trinucleotide repeat-containing gene 79 protein)	0.376727	NAN|1.2E+06|NAN	1.22107e+06	1.22107e+06	3	NAN|3.3E+05|1.2E+05	452254	226127	3	0.3249	5.39991	0.1767	MQ	q	I
331	4104_ML_FinalNorm	AR-22Y-0060DHT	O15417	TNRC18	Trinucleotide repeat-containing gene 18 protein (Long CAG trinucleotide repeat-containing gene 79 protein)	0.376727	NAN|1.9E+06|1.1E+06	2.94482e+06	1.47241e+06	3	NAN|3.3E+05|1.2E+05	452254	226127	3	0.65	6.51144	0.066	MQ	q	I
332	4104_ML_FinalNorm	AR-WT-0000DHT	O15417	TNRC18	Trinucleotide repeat-containing gene 18 protein (Long CAG trinucleotide repeat-containing gene 79 protein)	0.376727	3.9E+05|2.6E+05|1.5E+05	792305	264102	3	NAN|3.3E+05|1.2E+05	452254	226127	3	0.1448	1.16793	0.2423	MQ	q	I
333	4104_ML_FinalNorm	AR-WT-0060DHT	O15417	TNRC18	Trinucleotide repeat-containing gene 18 protein (Long CAG trinucleotide repeat-containing gene 79 protein)	0.376727	1.8E+07|1.7E+07|1.7E+07	5.14874e+07	1.71625e+07	3	NAN|3.3E+05|1.2E+05	452254	226127	3	1	75.8975	0	MQ	q	I
334	4104_ML_FinalNorm	AR-22Y-0000DHT	O15427	SLC16A3	Monocarboxylate transporter 4 (MCT 4) (Solute carrier family 16 member 3)	0.657364	1.4E+07|6.2E+06|8.2E+06	2.8598e+07	9.53265e+06	3	1.5E+06|5.9E+06|6.1E+06	1.34536e+07	4.48453e+06	3	0.3832	2.12568	0.1221	MQ	q	I
335	4104_ML_FinalNorm	AR-22Y-0060DHT	O15427	SLC16A3	Monocarboxylate transporter 4 (MCT 4) (Solute carrier family 16 member 3)	0.657364	2.3E+07|3.0E+07|2.2E+07	7.47681e+07	2.49227e+07	3	1.5E+06|5.9E+06|6.1E+06	1.34536e+07	4.48453e+06	3	0.8866	5.55749	0.0066	MQ	q	I
336	4104_ML_FinalNorm	AR-WT-0000DHT	O15427	SLC16A3	Monocarboxylate transporter 4 (MCT 4) (Solute carrier family 16 member 3)	0.657364	3.2E+07|2.7E+07|3.0E+07	8.99044e+07	2.99681e+07	3	1.5E+06|5.9E+06|6.1E+06	1.34536e+07	4.48453e+06	3	0.9365	6.68257	0.0038	MQ	q	I
337	4104_ML_FinalNorm	AR-WT-0060DHT	O15427	SLC16A3	Monocarboxylate transporter 4 (MCT 4) (Solute carrier family 16 member 3)	0.657364	4.1E+07|3.3E+07|1.4E+07	8.781e+07	2.927e+07	3	1.5E+06|5.9E+06|6.1E+06	1.34536e+07	4.48453e+06	3	0.8554	6.52688	0.0087	MQ	q	I
338	4104_ML_FinalNorm	AR-22Y-0000DHT	O15498	YKT6	Synaptobrevin homolog YKT6 (EC 2.3.1.-)	0.653265	2.5E+06|4.7E+06|3.8E+06	1.10542e+07	3.68473e+06	3	4.2E+06|3.9E+06|3.7E+06	1.17365e+07	3.91216e+06	3	0.0369	0.941866	0.348	MQ	q	I
339	4104_ML_FinalNorm	AR-22Y-0060DHT	O15498	YKT6	Synaptobrevin homolog YKT6 (EC 2.3.1.-)	0.653265	9.5E+05|2.3E+06|NAN	3.23578e+06	1.61789e+06	3	4.2E+06|3.9E+06|3.7E+06	1.17365e+07	3.91216e+06	3	0.003	0.413553	0.5707	MQ	q	I
340	4104_ML_FinalNorm	AR-WT-0000DHT	O15498	YKT6	Synaptobrevin homolog YKT6 (EC 2.3.1.-)	0.653265	2.0E+06|7.9E+05|2.3E+06	5.14014e+06	1.71338e+06	3	4.2E+06|3.9E+06|3.7E+06	1.17365e+07	3.91216e+06	3	0.0051	0.437962	0.5449	MQ	q	I
341	4104_ML_FinalNorm	AR-WT-0060DHT	O15498	YKT6	Synaptobrevin homolog YKT6 (EC 2.3.1.-)	0.653265	1.2E+06|2.1E+06|NAN	3.37205e+06	1.68602e+06	3	4.2E+06|3.9E+06|3.7E+06	1.17365e+07	3.91216e+06	3	0.0029	0.430969	0.5723	MQ	q	I
342	4104_ML_FinalNorm	AR-22Y-0000DHT	O15516	CLOCK	Circadian locomoter output cycles protein kaput (hCLOCK) (EC 2.3.1.48) (Class E basic helix-loop-helix protein 8) (bHLHe8)	0	3.0E+06|2.3E+06|4.9E+06	1.01955e+07	3.3985e+06	3	NAN|1.6E+06|1.3E+06	2.91304e+06	1.45652e+06	3	0.986	2.3333	0.0006	MQ	q	I
343	4104_ML_FinalNorm	AR-22Y-0060DHT	O15516	CLOCK	Circadian locomoter output cycles protein kaput (hCLOCK) (EC 2.3.1.48) (Class E basic helix-loop-helix protein 8) (bHLHe8)	0	NAN|NAN|2.6E+06	2.62792e+06	2.62792e+06	3	NAN|1.6E+06|1.3E+06	2.91304e+06	1.45652e+06	3	0.3328	1.80425	0.1723	MQ	q	I
344	4104_ML_FinalNorm	AR-WT-0000DHT	O15516	CLOCK	Circadian locomoter output cycles protein kaput (hCLOCK) (EC 2.3.1.48) (Class E basic helix-loop-helix protein 8) (bHLHe8)	0	2.2E+06|2.5E+06|2.0E+06	6.76225e+06	2.25408e+06	3	NAN|1.6E+06|1.3E+06	2.91304e+06	1.45652e+06	3	0.8236	1.54758	0.0124	MQ	q	I
345	4104_ML_FinalNorm	AR-WT-0060DHT	O15516	CLOCK	Circadian locomoter output cycles protein kaput (hCLOCK) (EC 2.3.1.48) (Class E basic helix-loop-helix protein 8) (bHLHe8)	0	3.4E+06|3.8E+06|4.1E+06	1.13221e+07	3.77404e+06	3	NAN|1.6E+06|1.3E+06	2.91304e+06	1.45652e+06	3	1	2.59114	0	MQ	q	I
346	4104_ML_FinalNorm	AR-WT-0000DHT	O15550	KDM6A	Lysine-specific demethylase 6A (EC 1.14.11.68) (Histone demethylase UTX) (Ubiquitously-transcribed TPR protein on the X chromosome) (Ubiquitously-transcribed X chromosome tetratricopeptide repeat protein) ([histone H3]-trimethyl-L-lysine(27) demethylase 6A)	0.397646	7.4E+05|NAN|NAN	742546	742546	3	2.5E+05|NAN|NAN	250770	250770	3	0.3333	2.96106	0.1476	MQ	q	I
347	4104_ML_FinalNorm	AR-WT-0060DHT	O15550	KDM6A	Lysine-specific demethylase 6A (EC 1.14.11.68) (Histone demethylase UTX) (Ubiquitously-transcribed TPR protein on the X chromosome) (Ubiquitously-transcribed X chromosome tetratricopeptide repeat protein) ([histone H3]-trimethyl-L-lysine(27) demethylase 6A)	0.397646	1.7E+06|NAN|1.3E+06	3.02903e+06	1.51452e+06	3	2.5E+05|NAN|NAN	250770	250770	3	0.6667	6.03946	0.0404	MQ	q	I
348	4104_ML_FinalNorm	AR-22Y-0000DHT	O43143	DHX15	Pre-mRNA-splicing factor ATP-dependent RNA helicase DHX15 (EC 3.6.4.13) (ATP-dependent RNA helicase #46) (DEAH box protein 15)	0.972855	4.7E+07|9.0E+07|6.8E+07	2.05118e+08	6.83728e+07	3	4.3E+07|7.0E+07|4.7E+07	1.60228e+08	5.34093e+07	3	0.2216	1.28017	0.2101	MQ	q	I
349	4104_ML_FinalNorm	AR-22Y-0060DHT	O43143	DHX15	Pre-mRNA-splicing factor ATP-dependent RNA helicase DHX15 (EC 3.6.4.13) (ATP-dependent RNA helicase #46) (DEAH box protein 15)	0.972855	5.4E+07|5.2E+07|6.6E+07	1.71315e+08	5.71048e+07	3	4.3E+07|7.0E+07|4.7E+07	1.60228e+08	5.34093e+07	3	0.0577	1.06919	0.3093	MQ	q	I
350	4104_ML_FinalNorm	AR-WT-0000DHT	O43143	DHX15	Pre-mRNA-splicing factor ATP-dependent RNA helicase DHX15 (EC 3.6.4.13) (ATP-dependent RNA helicase #46) (DEAH box protein 15)	0.972855	2.4E+07|2.1E+07|2.4E+07	6.89636e+07	2.29879e+07	3	4.3E+07|7.0E+07|4.7E+07	1.60228e+08	5.34093e+07	3	0.0063	0.430409	0.5322	MQ	q	I
351	4104_ML_FinalNorm	AR-WT-0060DHT	O43143	DHX15	Pre-mRNA-splicing factor ATP-dependent RNA helicase DHX15 (EC 3.6.4.13) (ATP-dependent RNA helicase #46) (DEAH box protein 15)	0.972855	3.2E+07|3.1E+07|2.6E+07	8.84968e+07	2.94989e+07	3	4.3E+07|7.0E+07|4.7E+07	1.60228e+08	5.34093e+07	3	0.0124	0.552318	0.4799	MQ	q	I
352	4104_ML_FinalNorm	AR-22Y-0060DHT	O43148	RNMT	mRNA cap guanine-N7 methyltransferase (EC 2.1.1.56) (RG7MT1) (mRNA (guanine-N(7))-methyltransferase) (mRNA cap methyltransferase) (hCMT1) (hMet) (hcm1p)	0.680419	NAN|3.4E+06|NAN	3.36118e+06	3.36118e+06	3	1.2E+07|9.5E+06|1.2E+07	3.30436e+07	1.10145e+07	3	0.0004	0.305159	0.6178	MQ	q	I
353	4104_ML_FinalNorm	AR-WT-0000DHT	O43148	RNMT	mRNA cap guanine-N7 methyltransferase (EC 2.1.1.56) (RG7MT1) (mRNA (guanine-N(7))-methyltransferase) (mRNA cap methyltransferase) (hCMT1) (hMet) (hcm1p)	0.680419	3.5E+06|5.6E+06|5.8E+06	1.4943e+07	4.981e+06	3	1.2E+07|9.5E+06|1.2E+07	3.30436e+07	1.10145e+07	3	0.0047	0.452221	0.5497	MQ	q	I
354	4104_ML_FinalNorm	AR-WT-0060DHT	O43148	RNMT	mRNA cap guanine-N7 methyltransferase (EC 2.1.1.56) (RG7MT1) (mRNA (guanine-N(7))-methyltransferase) (mRNA cap methyltransferase) (hCMT1) (hMet) (hcm1p)	0.680419	1.1E+07|3.1E+06|1.2E+07	2.63624e+07	8.78747e+06	3	1.2E+07|9.5E+06|1.2E+07	3.30436e+07	1.10145e+07	3	0.0214	0.797808	0.4192	MQ	q	I
355	4104_ML_FinalNorm	AR-22Y-0000DHT	O43150	ASAP2	Arf-GAP with SH3 domain, ANK repeat and PH domain-containing protein 2 (Development and differentiation-enhancing factor 2) (Paxillin-associated protein with ARF GAP activity 3) (PAG3) (Pyk2 C-terminus-associated protein) (PAP)	0.397646	NAN|4.9E+09|NAN	4.89797e+09	4.89797e+09	3	8.6E+05|NAN|1.4E+06	2.24014e+06	1.12007e+06	3	0.3333	4372.92	0.1476	MQ	q	I
356	4104_ML_FinalNorm	AR-WT-0000DHT	O43150	ASAP2	Arf-GAP with SH3 domain, ANK repeat and PH domain-containing protein 2 (Development and differentiation-enhancing factor 2) (Paxillin-associated protein with ARF GAP activity 3) (PAG3) (Pyk2 C-terminus-associated protein) (PAP)	0.397646	5.7E+06|4.1E+06|4.6E+06	1.44099e+07	4.80331e+06	3	8.6E+05|NAN|1.4E+06	2.24014e+06	1.12007e+06	3	0.9999	4.2884	0	MQ	q	I
357	4104_ML_FinalNorm	AR-WT-0060DHT	O43150	ASAP2	Arf-GAP with SH3 domain, ANK repeat and PH domain-containing protein 2 (Development and differentiation-enhancing factor 2) (Paxillin-associated protein with ARF GAP activity 3) (PAG3) (Pyk2 C-terminus-associated protein) (PAP)	0.397646	NAN|2.9E+06|2.8E+06	5.74172e+06	2.87086e+06	3	8.6E+05|NAN|1.4E+06	2.24014e+06	1.12007e+06	3	0.6451	2.56311	0.0669	MQ	q	I
358	4104_ML_FinalNorm	AR-22Y-0000DHT	O43166	SIPA1L1	Signal-induced proliferation-associated 1-like protein 1 (SIPA1-like protein 1) (High-risk human papilloma viruses E6 oncoproteins targeted protein 1) (E6-targeted protein 1)	0.697259	NAN|2.0E+07|1.9E+07	3.92575e+07	1.96287e+07	3	2.3E+07|2.8E+07|2.9E+07	8.00486e+07	2.66829e+07	3	0.0192	0.735631	0.4333	MQ	q	I
359	4104_ML_FinalNorm	AR-22Y-0060DHT	O43166	SIPA1L1	Signal-induced proliferation-associated 1-like protein 1 (SIPA1-like protein 1) (High-risk human papilloma viruses E6 oncoproteins targeted protein 1) (E6-targeted protein 1)	0.697259	NAN|4.8E+05|NAN	484776	484776	3	2.3E+07|2.8E+07|2.9E+07	8.00486e+07	2.66829e+07	3	0	0.0181681	0.6339	MQ	q	I
360	4104_ML_FinalNorm	AR-WT-0000DHT	O43166	SIPA1L1	Signal-induced proliferation-associated 1-like protein 1 (SIPA1-like protein 1) (High-risk human papilloma viruses E6 oncoproteins targeted protein 1) (E6-targeted protein 1)	0.697259	2.9E+07|3.3E+07|3.4E+07	9.55897e+07	3.18632e+07	3	2.3E+07|2.8E+07|2.9E+07	8.00486e+07	2.66829e+07	3	0.0857	1.19415	0.2771	MQ	q	I
361	4104_ML_FinalNorm	AR-WT-0060DHT	O43166	SIPA1L1	Signal-induced proliferation-associated 1-like protein 1 (SIPA1-like protein 1) (High-risk human papilloma viruses E6 oncoproteins targeted protein 1) (E6-targeted protein 1)	0.697259	3.0E+07|2.2E+07|2.6E+07	7.74019e+07	2.58006e+07	3	2.3E+07|2.8E+07|2.9E+07	8.00486e+07	2.66829e+07	3	0.0377	0.966937	0.3465	MQ	q	I
362	4104_ML_FinalNorm	AR-22Y-0000DHT	O43172	PRPF4	U4/U6 small nuclear ribonucleoprotein Prp4 (PRP4 homolog) (hPrp4) (U4/U6 snRNP 60 kDa protein) (WD splicing factor Prp4)	0.884866	NAN|NAN|2.2E+06	2.15203e+06	2.15203e+06	3	6.4E+07|6.7E+07|6.8E+07	1.98749e+08	6.62495e+07	3	0	0.0324837	0.6339	MQ	q	I
363	4104_ML_FinalNorm	AR-22Y-0060DHT	O43172	PRPF4	U4/U6 small nuclear ribonucleoprotein Prp4 (PRP4 homolog) (hPrp4) (U4/U6 snRNP 60 kDa protein) (WD splicing factor Prp4)	0.884866	6.9E+06|6.3E+06|1.0E+07	2.35263e+07	7.84209e+06	3	6.4E+07|6.7E+07|6.8E+07	1.98749e+08	6.62495e+07	3	0.0007	0.118372	0.6098	MQ	q	I
364	4104_ML_FinalNorm	AR-WT-0000DHT	O43172	PRPF4	U4/U6 small nuclear ribonucleoprotein Prp4 (PRP4 homolog) (hPrp4) (U4/U6 snRNP 60 kDa protein) (WD splicing factor Prp4)	0.884866	3.9E+07|4.0E+07|3.0E+07	1.09189e+08	3.63965e+07	3	6.4E+07|6.7E+07|6.8E+07	1.98749e+08	6.62495e+07	3	0.0161	0.549384	0.4521	MQ	q	I
365	4104_ML_FinalNorm	AR-WT-0060DHT	O43172	PRPF4	U4/U6 small nuclear ribonucleoprotein Prp4 (PRP4 homolog) (hPrp4) (U4/U6 snRNP 60 kDa protein) (WD splicing factor Prp4)	0.884866	3.2E+07|3.4E+07|2.7E+07	9.28397e+07	3.09466e+07	3	6.4E+07|6.7E+07|6.8E+07	1.98749e+08	6.62495e+07	3	0.0126	0.467121	0.478	MQ	q	I
366	4104_ML_FinalNorm	AR-22Y-0000DHT	O43175	PHGDH	D-3-phosphoglycerate dehydrogenase (3-PGDH) (EC 1.1.1.95) (2-oxoglutarate reductase) (EC 1.1.1.399) (Malate dehydrogenase) (EC 1.1.1.37)	0.961731	4.5E+07|5.7E+07|5.8E+07	1.59901e+08	5.33004e+07	3	3.1E+07|3.1E+07|3.4E+07	9.61658e+07	3.20553e+07	3	0.7722	1.66276	0.0174	MQ	q	I
367	4104_ML_FinalNorm	AR-22Y-0060DHT	O43175	PHGDH	D-3-phosphoglycerate dehydrogenase (3-PGDH) (EC 1.1.1.95) (2-oxoglutarate reductase) (EC 1.1.1.399) (Malate dehydrogenase) (EC 1.1.1.37)	0.961731	1.7E+07|8.8E+06|2.3E+07	4.92025e+07	1.64008e+07	3	3.1E+07|3.1E+07|3.4E+07	9.61658e+07	3.20553e+07	3	0.017	0.511642	0.4457	MQ	q	I
368	4104_ML_FinalNorm	AR-WT-0000DHT	O43175	PHGDH	D-3-phosphoglycerate dehydrogenase (3-PGDH) (EC 1.1.1.95) (2-oxoglutarate reductase) (EC 1.1.1.399) (Malate dehydrogenase) (EC 1.1.1.37)	0.961731	5.6E+06|5.8E+06|3.8E+06	1.51352e+07	5.04508e+06	3	3.1E+07|3.1E+07|3.4E+07	9.61658e+07	3.20553e+07	3	0.0025	0.157387	0.579	MQ	q	I
369	4104_ML_FinalNorm	AR-WT-0060DHT	O43175	PHGDH	D-3-phosphoglycerate dehydrogenase (3-PGDH) (EC 1.1.1.95) (2-oxoglutarate reductase) (EC 1.1.1.399) (Malate dehydrogenase) (EC 1.1.1.37)	0.961731	5.3E+06|3.2E+06|4.1E+06	1.26408e+07	4.2136e+06	3	3.1E+07|3.1E+07|3.4E+07	9.61658e+07	3.20553e+07	3	0.0018	0.131448	0.5908	MQ	q	I
370	4104_ML_FinalNorm	AR-22Y-0000DHT	O43237	DYNC1LI2	Cytoplasmic dynein 1 light intermediate chain 2 (Dynein light intermediate chain 2, cytosolic) (LIC-2) (LIC53/55)	0.77118	NAN|5.9E+06|1.2E+07	1.78871e+07	8.94353e+06	3	2.0E+07|2.1E+07|1.7E+07	5.82268e+07	1.94089e+07	3	0.0037	0.460795	0.5614	MQ	q	I
371	4104_ML_FinalNorm	AR-22Y-0060DHT	O43237	DYNC1LI2	Cytoplasmic dynein 1 light intermediate chain 2 (Dynein light intermediate chain 2, cytosolic) (LIC-2) (LIC53/55)	0.77118	1.3E+07|1.2E+07|4.9E+06	2.94496e+07	9.81655e+06	3	2.0E+07|2.1E+07|1.7E+07	5.82268e+07	1.94089e+07	3	0.0072	0.505775	0.5233	MQ	q	I
372	4104_ML_FinalNorm	AR-WT-0000DHT	O43237	DYNC1LI2	Cytoplasmic dynein 1 light intermediate chain 2 (Dynein light intermediate chain 2, cytosolic) (LIC-2) (LIC53/55)	0.77118	2.0E+07|2.1E+07|2.2E+07	6.28088e+07	2.09363e+07	3	2.0E+07|2.1E+07|1.7E+07	5.82268e+07	1.94089e+07	3	0.0352	1.07869	0.3542	MQ	q	I
373	4104_ML_FinalNorm	AR-WT-0060DHT	O43237	DYNC1LI2	Cytoplasmic dynein 1 light intermediate chain 2 (Dynein light intermediate chain 2, cytosolic) (LIC-2) (LIC53/55)	0.77118	1.2E+07|1.3E+07|1.1E+07	3.64697e+07	1.21566e+07	3	2.0E+07|2.1E+07|1.7E+07	5.82268e+07	1.94089e+07	3	0.0102	0.626339	0.4962	MQ	q	I
374	4104_ML_FinalNorm	AR-22Y-0000DHT	O43242	PSMD3	26S proteasome non-ATPase regulatory subunit 3 (26S proteasome regulatory subunit RPN3) (26S proteasome regulatory subunit S3) (Proteasome subunit p58)	0.944845	1.5E+07|2.2E+07|2.0E+07	5.667e+07	1.889e+07	3	3.8E+07|4.5E+07|4.4E+07	1.26699e+08	4.22331e+07	3	0.0044	0.447279	0.5532	MQ	q	I
375	4104_ML_FinalNorm	AR-22Y-0060DHT	O43242	PSMD3	26S proteasome non-ATPase regulatory subunit 3 (26S proteasome regulatory subunit RPN3) (26S proteasome regulatory subunit S3) (Proteasome subunit p58)	0.944845	1.2E+07|1.6E+07|7.2E+06	3.51645e+07	1.17215e+07	3	3.8E+07|4.5E+07|4.4E+07	1.26699e+08	4.22331e+07	3	0.0013	0.277542	0.5984	MQ	q	I
376	4104_ML_FinalNorm	AR-WT-0000DHT	O43242	PSMD3	26S proteasome non-ATPase regulatory subunit 3 (26S proteasome regulatory subunit RPN3) (26S proteasome regulatory subunit S3) (Proteasome subunit p58)	0.944845	6.9E+06|3.9E+06|6.2E+06	1.69935e+07	5.6645e+06	3	3.8E+07|4.5E+07|4.4E+07	1.26699e+08	4.22331e+07	3	0.0001	0.134125	0.6286	MQ	q	I
377	4104_ML_FinalNorm	AR-WT-0060DHT	O43242	PSMD3	26S proteasome non-ATPase regulatory subunit 3 (26S proteasome regulatory subunit RPN3) (26S proteasome regulatory subunit S3) (Proteasome subunit p58)	0.944845	4.1E+06|2.9E+06|4.0E+06	1.09888e+07	3.66294e+06	3	3.8E+07|4.5E+07|4.4E+07	1.26699e+08	4.22331e+07	3	0	0.0867313	0.6339	MQ	q	I
378	4104_ML_FinalNorm	AR-22Y-0000DHT	O43251	RBFOX2	RNA binding protein fox-1 homolog 2 (Fox-1 homolog B) (Hexaribonucleotide-binding protein 2) (RNA-binding motif protein 9) (RNA-binding protein 9) (Repressor of tamoxifen transcriptional activity)	0.679071	4.7E+06|5.0E+06|1.0E+07	1.99533e+07	6.65111e+06	3	NAN|1.8E+06|2.0E+06	3.80494e+06	1.90247e+06	3	1	3.49604	0	MQ	q	I
379	4104_ML_FinalNorm	AR-22Y-0060DHT	O43251	RBFOX2	RNA binding protein fox-1 homolog 2 (Fox-1 homolog B) (Hexaribonucleotide-binding protein 2) (RNA-binding motif protein 9) (RNA-binding protein 9) (Repressor of tamoxifen transcriptional activity)	0.679071	NAN|NAN|3.4E+06	3.42972e+06	3.42972e+06	3	NAN|1.8E+06|2.0E+06	3.80494e+06	1.90247e+06	3	0.3325	1.80277	0.1725	MQ	q	I
380	4104_ML_FinalNorm	AR-WT-0060DHT	O43251	RBFOX2	RNA binding protein fox-1 homolog 2 (Fox-1 homolog B) (Hexaribonucleotide-binding protein 2) (RNA-binding motif protein 9) (RNA-binding protein 9) (Repressor of tamoxifen transcriptional activity)	0.679071	3.1E+06|2.9E+06|1.6E+06	7.60023e+06	2.53341e+06	3	NAN|1.8E+06|2.0E+06	3.80494e+06	1.90247e+06	3	0.6077	1.33164	0.0743	MQ	q	I
381	4104_ML_FinalNorm	AR-WT-0000DHT	O43290	SART1	U4/U6.U5 tri-snRNP-associated protein 1 (SNU66 homolog) (hSnu66) (Squamous cell carcinoma antigen recognized by T-cells 1) (SART-1) (hSART-1) (U4/U6.U5 tri-snRNP-associated 110 kDa protein) (allergen Hom s 1)	0.938423	1.8E+07|9.4E+06|1.6E+07	4.30822e+07	1.43607e+07	3	5.5E+07|5.1E+07|5.3E+07	1.58306e+08	5.27686e+07	3	0.0011	0.272145	0.6013	MQ	q	I
382	4104_ML_FinalNorm	AR-WT-0060DHT	O43290	SART1	U4/U6.U5 tri-snRNP-associated protein 1 (SNU66 homolog) (hSnu66) (Squamous cell carcinoma antigen recognized by T-cells 1) (SART-1) (hSART-1) (U4/U6.U5 tri-snRNP-associated 110 kDa protein) (allergen Hom s 1)	0.938423	1.6E+07|1.5E+07|1.5E+07	4.51809e+07	1.50603e+07	3	5.5E+07|5.1E+07|5.3E+07	1.58306e+08	5.27686e+07	3	0.001	0.285403	0.6034	MQ	q	I
383	4104_ML_FinalNorm	AR-WT-0000DHT	O43303	CCP110	Centriolar coiled-coil protein of 110 kDa (Centrosomal protein of 110 kDa) (CP110) (Cep110)	0.451197	8.2E+05|6.7E+05|NAN	1.48611e+06	743053	3	7.4E+03|8.2E+03|8.7E+03	24300.1	8100.04	3	0.6667	91.7344	0.0404	MQ	q	I
384	4104_ML_FinalNorm	AR-WT-0060DHT	O43303	CCP110	Centriolar coiled-coil protein of 110 kDa (Centrosomal protein of 110 kDa) (CP110) (Cep110)	0.451197	NAN|NAN|5.4E+05	542632	542632	3	7.4E+03|8.2E+03|8.7E+03	24300.1	8100.04	3	0.3333	66.9913	0.1476	MQ	q	I
385	4104_ML_FinalNorm	AR-WT-0000DHT	O43314	PPIP5K2	Inositol hexakisphosphate and diphosphoinositol-pentakisphosphate kinase 2 (EC 2.7.4.21) (EC 2.7.4.24) (Diphosphoinositol pentakisphosphate kinase 2) (Histidine acid phosphatase domain-containing protein 1) (InsP6 and PP-IP5 kinase 2) (VIP1 homolog 2) (hsVIP2)	0.308233	2.2E+06|2.1E+06|2.0E+06	6.28878e+06	2.09626e+06	3	8.8E+05|8.8E+05|NAN	1.75674e+06	878371	3	1	2.38653	0	MQ	q	I
386	4104_ML_FinalNorm	AR-WT-0060DHT	O43314	PPIP5K2	Inositol hexakisphosphate and diphosphoinositol-pentakisphosphate kinase 2 (EC 2.7.4.21) (EC 2.7.4.24) (Diphosphoinositol pentakisphosphate kinase 2) (Histidine acid phosphatase domain-containing protein 1) (InsP6 and PP-IP5 kinase 2) (VIP1 homolog 2) (hsVIP2)	0.308233	1.6E+06|8.7E+05|1.2E+06	3.64863e+06	1.21621e+06	3	8.8E+05|8.8E+05|NAN	1.75674e+06	878371	3	0.4896	1.38462	0.0982	MQ	q	I
387	4104_ML_FinalNorm	AR-22Y-0060DHT	O43318	MAP3K7	Mitogen-activated protein kinase kinase kinase 7 (EC 2.7.11.25) (Transforming growth factor-beta-activated kinase 1) (TGF-beta-activated kinase 1)	0.653265	NAN|NAN|5.9E+06	5.92608e+06	5.92608e+06	3	6.1E+03|9.8E+03|8.8E+03	24650.4	8216.79	3	0.3333	721.216	0.1476	MQ	q	I
388	4104_ML_FinalNorm	AR-WT-0060DHT	O43318	MAP3K7	Mitogen-activated protein kinase kinase kinase 7 (EC 2.7.11.25) (Transforming growth factor-beta-activated kinase 1) (TGF-beta-activated kinase 1)	0.653265	NAN|4.0E+05|NAN	404305	404305	3	6.1E+03|9.8E+03|8.8E+03	24650.4	8216.79	3	0.3333	49.2047	0.1476	MQ	q	I
389	4104_ML_FinalNorm	AR-22Y-0000DHT	O43324	EEF1E1	Eukaryotic translation elongation factor 1 epsilon-1 (Aminoacyl tRNA synthetase complex-interacting multifunctional protein 3) (Elongation factor p18) (Multisynthase complex auxiliary component p18)	0.893303	6.4E+06|7.5E+06|6.3E+06	2.01202e+07	6.70674e+06	3	7.4E+06|4.6E+06|6.5E+06	1.84676e+07	6.15587e+06	3	0.0627	1.08949	0.3014	MQ	q	I
390	4104_ML_FinalNorm	AR-22Y-0060DHT	O43324	EEF1E1	Eukaryotic translation elongation factor 1 epsilon-1 (Aminoacyl tRNA synthetase complex-interacting multifunctional protein 3) (Elongation factor p18) (Multisynthase complex auxiliary component p18)	0.893303	5.0E+06|1.7E+06|NAN	6.63964e+06	3.31982e+06	3	7.4E+06|4.6E+06|6.5E+06	1.84676e+07	6.15587e+06	3	0.0222	0.539294	0.4143	MQ	q	I
391	4104_ML_FinalNorm	AR-WT-0000DHT	O43324	EEF1E1	Eukaryotic translation elongation factor 1 epsilon-1 (Aminoacyl tRNA synthetase complex-interacting multifunctional protein 3) (Elongation factor p18) (Multisynthase complex auxiliary component p18)	0.893303	4.3E+05|2.5E+05|4.2E+05	1.10158e+06	367195	3	7.4E+06|4.6E+06|6.5E+06	1.84676e+07	6.15587e+06	3	0.0032	0.0596495	0.5678	MQ	q	I
392	4104_ML_FinalNorm	AR-WT-0060DHT	O43324	EEF1E1	Eukaryotic translation elongation factor 1 epsilon-1 (Aminoacyl tRNA synthetase complex-interacting multifunctional protein 3) (Elongation factor p18) (Multisynthase complex auxiliary component p18)	0.893303	3.1E+05|3.6E+05|2.9E+05	957457	319152	3	7.4E+06|4.6E+06|6.5E+06	1.84676e+07	6.15587e+06	3	0.0025	0.0518452	0.579	MQ	q	I
393	4104_ML_FinalNorm	AR-22Y-0000DHT	O43353	RIPK2	Receptor-interacting serine/threonine-protein kinase 2 (EC 2.7.11.1) (CARD-containing interleukin-1 beta-converting enzyme-associated kinase) (CARD-containing IL-1 beta ICE-kinase) (RIP-like-interacting CLARP kinase) (Receptor-interacting protein 2) (RIP-2) (Tyrosine-protein kinase RIPK2) (EC 2.7.10.2)	0.349576	1.0E+06|5.7E+06|9.0E+06	1.57502e+07	5.25006e+06	3	6.0E+06|5.6E+06|4.9E+06	1.63974e+07	5.4658e+06	3	0.3159	0.960529	0.1791	MQ	q	I
394	4104_ML_FinalNorm	AR-22Y-0060DHT	O43353	RIPK2	Receptor-interacting serine/threonine-protein kinase 2 (EC 2.7.11.1) (CARD-containing interleukin-1 beta-converting enzyme-associated kinase) (CARD-containing IL-1 beta ICE-kinase) (RIP-like-interacting CLARP kinase) (Receptor-interacting protein 2) (RIP-2) (Tyrosine-protein kinase RIPK2) (EC 2.7.10.2)	0.349576	5.9E+06|6.6E+06|9.2E+06	2.16233e+07	7.20776e+06	3	6.0E+06|5.6E+06|4.9E+06	1.63974e+07	5.4658e+06	3	0.3491	1.3187	0.1374	MQ	q	I
395	4104_ML_FinalNorm	AR-WT-0000DHT	O43353	RIPK2	Receptor-interacting serine/threonine-protein kinase 2 (EC 2.7.11.1) (CARD-containing interleukin-1 beta-converting enzyme-associated kinase) (CARD-containing IL-1 beta ICE-kinase) (RIP-like-interacting CLARP kinase) (Receptor-interacting protein 2) (RIP-2) (Tyrosine-protein kinase RIPK2) (EC 2.7.10.2)	0.349576	9.9E+06|6.8E+06|6.7E+06	2.33629e+07	7.78764e+06	3	6.0E+06|5.6E+06|4.9E+06	1.63974e+07	5.4658e+06	3	0.3882	1.42479	0.1201	MQ	q	I
396	4104_ML_FinalNorm	AR-WT-0060DHT	O43353	RIPK2	Receptor-interacting serine/threonine-protein kinase 2 (EC 2.7.11.1) (CARD-containing interleukin-1 beta-converting enzyme-associated kinase) (CARD-containing IL-1 beta ICE-kinase) (RIP-like-interacting CLARP kinase) (Receptor-interacting protein 2) (RIP-2) (Tyrosine-protein kinase RIPK2) (EC 2.7.10.2)	0.349576	6.3E+06|7.4E+06|4.7E+06	1.83863e+07	6.12877e+06	3	6.0E+06|5.6E+06|4.9E+06	1.63974e+07	5.4658e+06	3	0.0997	1.12129	0.2651	MQ	q	I
397	4104_ML_FinalNorm	AR-22Y-0000DHT	O43390	HNRNPR	Heterogeneous nuclear ribonucleoprotein R (hnRNP R)	0.974327	3.7E+07|1.2E+08|9.1E+07	2.45483e+08	8.18276e+07	3	1.0E+08|7.9E+07|9.2E+07	2.75219e+08	9.17395e+07	3	0.0541	0.891955	0.3146	MQ	q	I
398	4104_ML_FinalNorm	AR-22Y-0060DHT	O43390	HNRNPR	Heterogeneous nuclear ribonucleoprotein R (hnRNP R)	0.974327	1.5E+07|1.6E+07|1.9E+07	4.99496e+07	1.66499e+07	3	1.0E+08|7.9E+07|9.2E+07	2.75219e+08	9.17395e+07	3	0.014	0.181491	0.4675	MQ	q	I
399	4104_ML_FinalNorm	AR-WT-0000DHT	O43390	HNRNPR	Heterogeneous nuclear ribonucleoprotein R (hnRNP R)	0.974327	4.0E+06|4.6E+05|2.3E+06	6.79455e+06	2.26485e+06	3	1.0E+08|7.9E+07|9.2E+07	2.75219e+08	9.17395e+07	3	0.0026	0.0246878	0.5771	MQ	q	I
400	4104_ML_FinalNorm	AR-WT-0060DHT	O43390	HNRNPR	Heterogeneous nuclear ribonucleoprotein R (hnRNP R)	0.974327	NAN|6.1E+05|NAN	605109	605109	3	1.0E+08|7.9E+07|9.2E+07	2.75219e+08	9.17395e+07	3	0.0002	0.00659594	0.6234	MQ	q	I
401	4104_ML_FinalNorm	AR-22Y-0000DHT	O43395	PRPF3	U4/U6 small nuclear ribonucleoprotein Prp3 (Pre-mRNA-splicing factor 3) (hPrp3) (U4/U6 snRNP 90 kDa protein)	0.906662	NAN|NAN|4.4E+05	437345	437345	3	5.5E+07|7.1E+07|6.7E+07	1.92598e+08	6.41994e+07	3	0.0001	0.00681229	0.6286	MQ	q	I
402	4104_ML_FinalNorm	AR-22Y-0060DHT	O43395	PRPF3	U4/U6 small nuclear ribonucleoprotein Prp3 (Pre-mRNA-splicing factor 3) (hPrp3) (U4/U6 snRNP 90 kDa protein)	0.906662	1.3E+06|NAN|NAN	1.31887e+06	1.31887e+06	3	5.5E+07|7.1E+07|6.7E+07	1.92598e+08	6.41994e+07	3	0.0005	0.0205433	0.6148	MQ	q	I
403	4104_ML_FinalNorm	AR-WT-0000DHT	O43395	PRPF3	U4/U6 small nuclear ribonucleoprotein Prp3 (Pre-mRNA-splicing factor 3) (hPrp3) (U4/U6 snRNP 90 kDa protein)	0.906662	4.2E+07|4.0E+07|4.3E+07	1.25162e+08	4.17206e+07	3	5.5E+07|7.1E+07|6.7E+07	1.92598e+08	6.41994e+07	3	0.0269	0.64986	0.388	MQ	q	I
404	4104_ML_FinalNorm	AR-WT-0060DHT	O43395	PRPF3	U4/U6 small nuclear ribonucleoprotein Prp3 (Pre-mRNA-splicing factor 3) (hPrp3) (U4/U6 snRNP 90 kDa protein)	0.906662	3.0E+07|3.4E+07|3.2E+07	9.5829e+07	3.1943e+07	3	5.5E+07|7.1E+07|6.7E+07	1.92598e+08	6.41994e+07	3	0.0238	0.497559	0.4044	MQ	q	I
405	4104_ML_FinalNorm	AR-22Y-0000DHT	O43396	TXNL1	Thioredoxin-like protein 1 (32 kDa thioredoxin-related protein)	0.852079	1.4E+07|1.1E+07|1.0E+07	3.47949e+07	1.15983e+07	3	2.0E+06|1.0E+06|1.9E+06	4.90626e+06	1.63542e+06	3	1	7.09195	0	MQ	q	I
406	4104_ML_FinalNorm	AR-22Y-0060DHT	O43396	TXNL1	Thioredoxin-like protein 1 (32 kDa thioredoxin-related protein)	0.852079	NAN|4.9E+06|1.3E+07	1.81673e+07	9.08364e+06	3	2.0E+06|1.0E+06|1.9E+06	4.90626e+06	1.63542e+06	3	0.6542	5.55432	0.0649	MQ	q	I
407	4104_ML_FinalNorm	AR-WT-0000DHT	O43396	TXNL1	Thioredoxin-like protein 1 (32 kDa thioredoxin-related protein)	0.852079	9.2E+06|7.4E+06|9.3E+06	2.59608e+07	8.65361e+06	3	2.0E+06|1.0E+06|1.9E+06	4.90626e+06	1.63542e+06	3	0.9999	5.29137	0	MQ	q	I
408	4104_ML_FinalNorm	AR-WT-0060DHT	O43396	TXNL1	Thioredoxin-like protein 1 (32 kDa thioredoxin-related protein)	0.852079	8.7E+06|7.7E+06|7.3E+06	2.37459e+07	7.91531e+06	3	2.0E+06|1.0E+06|1.9E+06	4.90626e+06	1.63542e+06	3	0.9998	4.83993	0	MQ	q	I
409	4104_ML_FinalNorm	AR-22Y-0000DHT	O43399	TPD52L2	Tumor protein D54 (hD54) (Tumor protein D52-like 2)	0.788087	7.8E+06|1.1E+07|1.5E+07	3.39434e+07	1.13145e+07	3	4.0E+07|3.9E+07|3.3E+07	1.12217e+08	3.74055e+07	3	0.0015	0.302481	0.5948	MQ	q	I
410	4104_ML_FinalNorm	AR-22Y-0060DHT	O43399	TPD52L2	Tumor protein D54 (hD54) (Tumor protein D52-like 2)	0.788087	1.4E+07|5.4E+06|5.2E+06	2.42251e+07	8.07504e+06	3	4.0E+07|3.9E+07|3.3E+07	1.12217e+08	3.74055e+07	3	0.0008	0.215878	0.6074	MQ	q	I
411	4104_ML_FinalNorm	AR-WT-0000DHT	O43399	TPD52L2	Tumor protein D54 (hD54) (Tumor protein D52-like 2)	0.788087	3.7E+07|3.4E+07|2.7E+07	9.83447e+07	3.27816e+07	3	4.0E+07|3.9E+07|3.3E+07	1.12217e+08	3.74055e+07	3	0.021	0.876383	0.4215	MQ	q	I
412	4104_ML_FinalNorm	AR-WT-0060DHT	O43399	TPD52L2	Tumor protein D54 (hD54) (Tumor protein D52-like 2)	0.788087	2.4E+07|2.3E+07|2.2E+07	6.95347e+07	2.31782e+07	3	4.0E+07|3.9E+07|3.3E+07	1.12217e+08	3.74055e+07	3	0.0099	0.619647	0.4987	MQ	q	I
413	4104_ML_FinalNorm	AR-WT-0000DHT	O43426	SYNJ1	Synaptojanin-1 (EC 3.1.3.36) (Synaptic inositol 1,4,5-trisphosphate 5-phosphatase 1)	0.628895	1.1E+06|5.9E+05|1.2E+06	2.87566e+06	958552	3	1.2E+05|NAN|NAN	118165	118165	3	1	8.11201	0	MQ	q	I
414	4104_ML_FinalNorm	AR-WT-0060DHT	O43426	SYNJ1	Synaptojanin-1 (EC 3.1.3.36) (Synaptic inositol 1,4,5-trisphosphate 5-phosphatase 1)	0.628895	NAN|3.8E+05|NAN	375799	375799	3	1.2E+05|NAN|NAN	118165	118165	3	0.3333	3.1803	0.1476	MQ	q	I
415	4104_ML_FinalNorm	AR-WT-0000DHT	O43432	EIF4G3	Eukaryotic translation initiation factor 4 gamma 3 (eIF-4-gamma 3) (eIF-4G 3) (eIF4G 3) (eIF-4-gamma II) (eIF4GII)	0.87002	5.1E+05|7.1E+05|1.6E+06	2.85783e+06	952610	3	7.6E+05|2.6E+06|2.0E+06	5.40496e+06	1.80165e+06	3	0.043	0.528741	0.3342	MQ	q	I
416	4104_ML_FinalNorm	AR-WT-0060DHT	O43432	EIF4G3	Eukaryotic translation initiation factor 4 gamma 3 (eIF-4-gamma 3) (eIF-4G 3) (eIF4G 3) (eIF-4-gamma II) (eIF4GII)	0.87002	9.0E+05|6.4E+05|1.0E+06	2.55538e+06	851792	3	7.6E+05|2.6E+06|2.0E+06	5.40496e+06	1.80165e+06	3	0.0286	0.472783	0.3795	MQ	q	I
417	4104_ML_FinalNorm	AR-WT-0000DHT	O43435	TBX1	T-box transcription factor TBX1 (T-box protein 1) (Testis-specific T-box protein)	0	5.2E+05|NAN|NAN	515847	515847	3	6.1E+03|8.8E+03|1.2E+04	27219.6	9073.2	3	0.3333	56.8539	0.1476	MQ	q	I
418	4104_ML_FinalNorm	AR-WT-0060DHT	O43435	TBX1	T-box transcription factor TBX1 (T-box protein 1) (Testis-specific T-box protein)	0	6.9E+06|7.0E+06|6.7E+06	2.05491e+07	6.84969e+06	3	6.1E+03|8.8E+03|1.2E+04	27219.6	9073.2	3	1	754.937	0	MQ	q	I
419	4104_ML_FinalNorm	AR-22Y-0000DHT	O43447	PPIH	Peptidyl-prolyl cis-trans isomerase H (PPIase H) (EC 5.2.1.8) (Rotamase H) (Small nuclear ribonucleoprotein particle-specific cyclophilin H) (CypH) (U-snRNP-associated cyclophilin SnuCyp-20) (USA-CYP)	0.691534	1.3E+06|NAN|NAN	1.30988e+06	1.30988e+06	3	9.5E+06|1.1E+07|1.2E+07	3.23557e+07	1.07852e+07	3	0	0.121451	0.6339	MQ	q	I
420	4104_ML_FinalNorm	AR-22Y-0060DHT	O43447	PPIH	Peptidyl-prolyl cis-trans isomerase H (PPIase H) (EC 5.2.1.8) (Rotamase H) (Small nuclear ribonucleoprotein particle-specific cyclophilin H) (CypH) (U-snRNP-associated cyclophilin SnuCyp-20) (USA-CYP)	0.691534	NAN|NAN|2.5E+06	2.53406e+06	2.53406e+06	3	9.5E+06|1.1E+07|1.2E+07	3.23557e+07	1.07852e+07	3	0.0002	0.234956	0.6234	MQ	q	I
421	4104_ML_FinalNorm	AR-WT-0000DHT	O43447	PPIH	Peptidyl-prolyl cis-trans isomerase H (PPIase H) (EC 5.2.1.8) (Rotamase H) (Small nuclear ribonucleoprotein particle-specific cyclophilin H) (CypH) (U-snRNP-associated cyclophilin SnuCyp-20) (USA-CYP)	0.691534	3.9E+06|6.2E+06|6.2E+06	1.6339e+07	5.44634e+06	3	9.5E+06|1.1E+07|1.2E+07	3.23557e+07	1.07852e+07	3	0.0063	0.504981	0.5322	MQ	q	I
422	4104_ML_FinalNorm	AR-WT-0060DHT	O43447	PPIH	Peptidyl-prolyl cis-trans isomerase H (PPIase H) (EC 5.2.1.8) (Rotamase H) (Small nuclear ribonucleoprotein particle-specific cyclophilin H) (CypH) (U-snRNP-associated cyclophilin SnuCyp-20) (USA-CYP)	0.691534	4.3E+06|6.9E+06|4.7E+06	1.59243e+07	5.30809e+06	3	9.5E+06|1.1E+07|1.2E+07	3.23557e+07	1.07852e+07	3	0.0059	0.492162	0.536	MQ	q	I
423	4104_ML_FinalNorm	AR-WT-0060DHT	O43474	KLF4	Krueppel-like factor 4 (Epithelial zinc finger protein EZF) (Gut-enriched krueppel-like factor)	0	1.4E+07|1.3E+07|1.1E+07	3.72296e+07	1.24099e+07	3	6.7E+03|9.6E+03|1.0E+04	26550.1	8850.02	3	1	1402.24	0	MQ	q	I
424	4104_ML_FinalNorm	AR-22Y-0000DHT	O43491	EPB41L2	Band 4.1-like protein 2 (Erythrocyte membrane protein band 4.1-like 2) (Generally expressed protein 4.1) (4.1G)	0.915581	5.7E+06|2.8E+06|2.8E+06	1.12899e+07	3.7633e+06	3	4.1E+07|3.3E+07|4.3E+07	1.17777e+08	3.9259e+07	3	0	0.0958583	0.6339	MQ	q	I
425	4104_ML_FinalNorm	AR-22Y-0060DHT	O43491	EPB41L2	Band 4.1-like protein 2 (Erythrocyte membrane protein band 4.1-like 2) (Generally expressed protein 4.1) (4.1G)	0.915581	3.2E+06|8.9E+05|4.5E+06	8.59644e+06	2.86548e+06	3	4.1E+07|3.3E+07|4.3E+07	1.17777e+08	3.9259e+07	3	0	0.0729891	0.6339	MQ	q	I
426	4104_ML_FinalNorm	AR-WT-0000DHT	O43491	EPB41L2	Band 4.1-like protein 2 (Erythrocyte membrane protein band 4.1-like 2) (Generally expressed protein 4.1) (4.1G)	0.915581	9.6E+06|1.1E+07|8.9E+06	2.92352e+07	9.74507e+06	3	4.1E+07|3.3E+07|4.3E+07	1.17777e+08	3.9259e+07	3	0.0006	0.248225	0.6122	MQ	q	I
427	4104_ML_FinalNorm	AR-WT-0060DHT	O43491	EPB41L2	Band 4.1-like protein 2 (Erythrocyte membrane protein band 4.1-like 2) (Generally expressed protein 4.1) (4.1G)	0.915581	4.6E+06|4.7E+06|6.2E+06	1.55899e+07	5.19664e+06	3	4.1E+07|3.3E+07|4.3E+07	1.17777e+08	3.9259e+07	3	0.0001	0.132368	0.6286	MQ	q	I
428	4104_ML_FinalNorm	AR-WT-0000DHT	O43504	LAMTOR5	Ragulator complex protein LAMTOR5 (Hepatitis B virus X-interacting protein) (HBV X-interacting protein) (HBX-interacting protein) (Late endosomal/lysosomal adaptor and MAPK and MTOR activator 5)	0.125442	4.3E+06|4.3E+06|4.4E+06	1.29866e+07	4.32886e+06	3	3.4E+06|3.0E+06|2.8E+06	9.18757e+06	3.06252e+06	3	0.3697	1.41349	0.1266	MQ	q	I
429	4104_ML_FinalNorm	AR-WT-0060DHT	O43504	LAMTOR5	Ragulator complex protein LAMTOR5 (Hepatitis B virus X-interacting protein) (HBV X-interacting protein) (HBX-interacting protein) (Late endosomal/lysosomal adaptor and MAPK and MTOR activator 5)	0.125442	1.1E+06|3.3E+06|7.4E+05	5.13981e+06	1.71327e+06	3	3.4E+06|3.0E+06|2.8E+06	9.18757e+06	3.06252e+06	3	0.0129	0.559431	0.4759	MQ	q	I
430	4104_ML_FinalNorm	AR-WT-0000DHT	O43524	FOXO3	Forkhead box protein O3 (AF6q21 protein) (Forkhead in rhabdomyosarcoma-like 1)	0.222923	1.2E+06|NAN|8.2E+05	2.00509e+06	1.00255e+06	3	NAN|8.8E+05|NAN	883879	883879	3	0.1504	1.13426	0.2394	MQ	q	I
431	4104_ML_FinalNorm	AR-22Y-0000DHT	O43583	DENR	Density-regulated protein (DRP) (Protein DRP1) (Smooth muscle cell-associated protein 3) (SMAP-3)	0.713837	2.0E+06|5.9E+06|6.8E+06	1.47452e+07	4.91508e+06	3	3.5E+06|3.2E+06|3.0E+06	9.57342e+06	3.19114e+06	3	0.6689	1.54023	0.0397	MQ	q	I
432	4104_ML_FinalNorm	AR-22Y-0060DHT	O43583	DENR	Density-regulated protein (DRP) (Protein DRP1) (Smooth muscle cell-associated protein 3) (SMAP-3)	0.713837	1.1E+06|2.9E+06|3.3E+06	7.3269e+06	2.4423e+06	3	3.5E+06|3.2E+06|3.0E+06	9.57342e+06	3.19114e+06	3	0.0206	0.765338	0.4232	MQ	q	I
433	4104_ML_FinalNorm	AR-WT-0000DHT	O43583	DENR	Density-regulated protein (DRP) (Protein DRP1) (Smooth muscle cell-associated protein 3) (SMAP-3)	0.713837	9.5E+05|NAN|9.5E+05	1.89966e+06	949830	3	3.5E+06|3.2E+06|3.0E+06	9.57342e+06	3.19114e+06	3	0.0014	0.297646	0.5968	MQ	q	I
434	4104_ML_FinalNorm	AR-WT-0060DHT	O43583	DENR	Density-regulated protein (DRP) (Protein DRP1) (Smooth muscle cell-associated protein 3) (SMAP-3)	0.713837	7.7E+05|NAN|7.5E+05	1.52366e+06	761830	3	3.5E+06|3.2E+06|3.0E+06	9.57342e+06	3.19114e+06	3	0.0007	0.238733	0.6098	MQ	q	I
435	4104_ML_FinalNorm	AR-22Y-0000DHT	O43592	XPOT	Exportin-T (Exportin(tRNA)) (tRNA exportin)	0.752108	NAN|1.2E+07|8.4E+06	2.04415e+07	1.02207e+07	3	9.5E+07|7.3E+07|8.7E+07	2.56275e+08	8.54251e+07	3	0	0.119646	0.6339	MQ	q	I
436	4104_ML_FinalNorm	AR-22Y-0060DHT	O43592	XPOT	Exportin-T (Exportin(tRNA)) (tRNA exportin)	0.752108	3.6E+06|NAN|5.9E+06	9.47246e+06	4.73623e+06	3	9.5E+07|7.3E+07|8.7E+07	2.56275e+08	8.54251e+07	3	0	0.055443	0.6339	MQ	q	I
437	4104_ML_FinalNorm	AR-WT-0000DHT	O43592	XPOT	Exportin-T (Exportin(tRNA)) (tRNA exportin)	0.752108	7.8E+06|7.7E+06|5.4E+06	2.09319e+07	6.97731e+06	3	9.5E+07|7.3E+07|8.7E+07	2.56275e+08	8.54251e+07	3	0	0.0816775	0.6339	MQ	q	I
438	4104_ML_FinalNorm	AR-WT-0060DHT	O43592	XPOT	Exportin-T (Exportin(tRNA)) (tRNA exportin)	0.752108	8.7E+06|7.7E+06|8.6E+06	2.5029e+07	8.343e+06	3	9.5E+07|7.3E+07|8.7E+07	2.56275e+08	8.54251e+07	3	0	0.0976645	0.6339	MQ	q	I
439	4104_ML_FinalNorm	AR-22Y-0000DHT	O43615	TIMM44	Mitochondrial import inner membrane translocase subunit TIM44	0.838729	9.7E+06|1.0E+07|9.9E+06	2.95575e+07	9.8525e+06	3	4.5E+07|4.1E+07|3.6E+07	1.22158e+08	4.07193e+07	3	0.0006	0.241962	0.6122	MQ	q	I
440	4104_ML_FinalNorm	AR-22Y-0060DHT	O43615	TIMM44	Mitochondrial import inner membrane translocase subunit TIM44	0.838729	1.5E+07|1.7E+07|1.6E+07	4.75897e+07	1.58632e+07	3	4.5E+07|4.1E+07|3.6E+07	1.22158e+08	4.07193e+07	3	0.0028	0.389576	0.5734	MQ	q	I
441	4104_ML_FinalNorm	AR-WT-0000DHT	O43615	TIMM44	Mitochondrial import inner membrane translocase subunit TIM44	0.838729	3.7E+07|4.0E+07|3.1E+07	1.0804e+08	3.60134e+07	3	4.5E+07|4.1E+07|3.6E+07	1.22158e+08	4.07193e+07	3	0.0214	0.884432	0.4192	MQ	q	I
442	4104_ML_FinalNorm	AR-WT-0060DHT	O43615	TIMM44	Mitochondrial import inner membrane translocase subunit TIM44	0.838729	3.4E+07|3.2E+07|3.5E+07	1.01598e+08	3.38661e+07	3	4.5E+07|4.1E+07|3.6E+07	1.22158e+08	4.07193e+07	3	0.019	0.831699	0.4343	MQ	q	I
443	4104_ML_FinalNorm	AR-WT-0000DHT	O43660	PLRG1	Pleiotropic regulator 1	0.847299	2.8E+05|NAN|NAN	282302	282302	3	7.5E+06|8.2E+06|8.6E+06	2.43771e+07	8.12569e+06	3	0	0.034742	0.6339	MQ	q	I
444	4104_ML_FinalNorm	AR-22Y-0000DHT	O43670	ZNF207	BUB3-interacting and GLEBS motif-containing protein ZNF207 (BuGZ) (hBuGZ) (Zinc finger protein 207)	0.722811	2.1E+07|2.1E+07|1.7E+07	5.94229e+07	1.98076e+07	3	5.1E+06|5.4E+06|5.7E+06	1.62048e+07	5.40159e+06	3	1	3.667	0	MQ	q	I
445	4104_ML_FinalNorm	AR-22Y-0060DHT	O43670	ZNF207	BUB3-interacting and GLEBS motif-containing protein ZNF207 (BuGZ) (hBuGZ) (Zinc finger protein 207)	0.722811	1.1E+07|7.1E+06|1.2E+07	2.96686e+07	9.88952e+06	3	5.1E+06|5.4E+06|5.7E+06	1.62048e+07	5.40159e+06	3	0.7258	1.83085	0.0235	MQ	q	I
446	4104_ML_FinalNorm	AR-WT-0000DHT	O43670	ZNF207	BUB3-interacting and GLEBS motif-containing protein ZNF207 (BuGZ) (hBuGZ) (Zinc finger protein 207)	0.722811	3.0E+06|3.6E+06|3.0E+06	9.55233e+06	3.18411e+06	3	5.1E+06|5.4E+06|5.7E+06	1.62048e+07	5.40159e+06	3	0.0088	0.589476	0.5077	MQ	q	I
447	4104_ML_FinalNorm	AR-WT-0060DHT	O43670	ZNF207	BUB3-interacting and GLEBS motif-containing protein ZNF207 (BuGZ) (hBuGZ) (Zinc finger protein 207)	0.722811	5.4E+06|4.7E+06|5.8E+06	1.58625e+07	5.28749e+06	3	5.1E+06|5.4E+06|5.7E+06	1.62048e+07	5.40159e+06	3	0.0265	0.978877	0.3898	MQ	q	I
448	4104_ML_FinalNorm	AR-WT-0000DHT	O43683	BUB1	Mitotic checkpoint serine/threonine-protein kinase BUB1 (hBUB1) (EC 2.7.11.1) (BUB1A)	0.537602	2.7E+06|4.2E+06|3.4E+06	1.03818e+07	3.46059e+06	3	6.4E+03|7.7E+03|9.8E+03	23879.1	7959.68	3	1	434.764	0	MQ	q	I
449	4104_ML_FinalNorm	AR-WT-0060DHT	O43683	BUB1	Mitotic checkpoint serine/threonine-protein kinase BUB1 (hBUB1) (EC 2.7.11.1) (BUB1A)	0.537602	NAN|4.4E+05|5.2E+05	966806	483403	3	6.4E+03|7.7E+03|9.8E+03	23879.1	7959.68	3	0.6667	60.7315	0.0404	MQ	q	I
450	4104_ML_FinalNorm	AR-22Y-0000DHT	O43684	BUB3	Mitotic checkpoint protein BUB3	0.929119	1.8E+07|2.9E+07|2.9E+07	7.61112e+07	2.53704e+07	3	2.1E+07|1.9E+07|1.7E+07	5.75754e+07	1.91918e+07	3	0.4313	1.32194	0.1089	MQ	q	I
451	4104_ML_FinalNorm	AR-22Y-0060DHT	O43684	BUB3	Mitotic checkpoint protein BUB3	0.929119	6.5E+06|1.1E+07|8.6E+06	2.63222e+07	8.77408e+06	3	2.1E+07|1.9E+07|1.7E+07	5.75754e+07	1.91918e+07	3	0.0048	0.457178	0.5481	MQ	q	I
452	4104_ML_FinalNorm	AR-WT-0000DHT	O43684	BUB3	Mitotic checkpoint protein BUB3	0.929119	9.2E+06|1.0E+07|1.1E+07	3.08565e+07	1.02855e+07	3	2.1E+07|1.9E+07|1.7E+07	5.75754e+07	1.91918e+07	3	0.0069	0.535931	0.5266	MQ	q	I
453	4104_ML_FinalNorm	AR-WT-0060DHT	O43684	BUB3	Mitotic checkpoint protein BUB3	0.929119	1.4E+07|1.5E+07|1.2E+07	4.15257e+07	1.38419e+07	3	2.1E+07|1.9E+07|1.7E+07	5.75754e+07	1.91918e+07	3	0.0141	0.721241	0.4666	MQ	q	I
454	4104_ML_FinalNorm	AR-22Y-0000DHT	O43707	ACTN4	Alpha-actinin-4 (Non-muscle alpha-actinin 4)	0.96741	3.9E+07|3.3E+07|7.7E+07	1.48873e+08	4.96242e+07	3	2.0E+07|3.0E+07|1.7E+07	6.65392e+07	2.21797e+07	3	0.5652	2.23737	0.0814	MQ	q	I
455	4104_ML_FinalNorm	AR-22Y-0060DHT	O43707	ACTN4	Alpha-actinin-4 (Non-muscle alpha-actinin 4)	0.96741	4.2E+06|7.5E+06|7.2E+05	1.2419e+07	4.13965e+06	3	2.0E+07|3.0E+07|1.7E+07	6.65392e+07	2.21797e+07	3	0.0124	0.186641	0.4799	MQ	q	I
456	4104_ML_FinalNorm	AR-WT-0000DHT	O43707	ACTN4	Alpha-actinin-4 (Non-muscle alpha-actinin 4)	0.96741	3.5E+07|1.6E+07|2.0E+07	7.04743e+07	2.34914e+07	3	2.0E+07|3.0E+07|1.7E+07	6.65392e+07	2.21797e+07	3	0.1243	1.05914	0.2518	MQ	q	I
457	4104_ML_FinalNorm	AR-WT-0060DHT	O43707	ACTN4	Alpha-actinin-4 (Non-muscle alpha-actinin 4)	0.96741	3.9E+06|8.7E+06|1.3E+07	2.554e+07	8.51332e+06	3	2.0E+07|3.0E+07|1.7E+07	6.65392e+07	2.21797e+07	3	0.0272	0.383833	0.3863	MQ	q	I
458	4104_ML_FinalNorm	AR-WT-0000DHT	O43719	HTATSF1	HIV Tat-specific factor 1 (Tat-SF1)	0.881955	1.0E+06|2.5E+06|NAN	3.52653e+06	1.76327e+06	3	4.1E+06|2.1E+06|2.2E+06	8.4565e+06	2.81883e+06	3	0.0194	0.62553	0.4318	MQ	q	I
459	4104_ML_FinalNorm	AR-WT-0060DHT	O43719	HTATSF1	HIV Tat-specific factor 1 (Tat-SF1)	0.881955	1.1E+06|1.0E+06|9.6E+05	3.02789e+06	1.0093e+06	3	4.1E+06|2.1E+06|2.2E+06	8.4565e+06	2.81883e+06	3	0.0057	0.358055	0.5379	MQ	q	I
460	4104_ML_FinalNorm	AR-22Y-0000DHT	O43747	AP1G1	AP-1 complex subunit gamma-1 (Adaptor protein complex AP-1 subunit gamma-1) (Adaptor-related protein complex 1 subunit gamma-1) (Clathrin assembly protein complex 1 gamma-1 large chain) (Gamma1-adaptin) (Golgi adaptor HA1/AP1 adaptin subunit gamma-1)	0.53968	7.0E+06|1.4E+07|1.3E+07	3.32692e+07	1.10897e+07	3	5.6E+06|7.2E+06|1.0E+07	2.29911e+07	7.6637e+06	3	0.2859	1.44705	0.1879	MQ	q	I
461	4104_ML_FinalNorm	AR-22Y-0060DHT	O43747	AP1G1	AP-1 complex subunit gamma-1 (Adaptor protein complex AP-1 subunit gamma-1) (Adaptor-related protein complex 1 subunit gamma-1) (Clathrin assembly protein complex 1 gamma-1 large chain) (Gamma1-adaptin) (Golgi adaptor HA1/AP1 adaptin subunit gamma-1)	0.53968	NAN|5.4E+06|4.5E+06	9.9483e+06	4.97415e+06	3	5.6E+06|7.2E+06|1.0E+07	2.29911e+07	7.6637e+06	3	0.0304	0.649053	0.3706	MQ	q	I
462	4104_ML_FinalNorm	AR-WT-0000DHT	O43747	AP1G1	AP-1 complex subunit gamma-1 (Adaptor protein complex AP-1 subunit gamma-1) (Adaptor-related protein complex 1 subunit gamma-1) (Clathrin assembly protein complex 1 gamma-1 large chain) (Gamma1-adaptin) (Golgi adaptor HA1/AP1 adaptin subunit gamma-1)	0.53968	8.4E+05|NAN|NAN	842464	842464	3	5.6E+06|7.2E+06|1.0E+07	2.29911e+07	7.6637e+06	3	0.0011	0.109929	0.6013	MQ	q	I
463	4104_ML_FinalNorm	AR-WT-0060DHT	O43747	AP1G1	AP-1 complex subunit gamma-1 (Adaptor protein complex AP-1 subunit gamma-1) (Adaptor-related protein complex 1 subunit gamma-1) (Clathrin assembly protein complex 1 gamma-1 large chain) (Gamma1-adaptin) (Golgi adaptor HA1/AP1 adaptin subunit gamma-1)	0.53968	8.7E+05|9.7E+05|NAN	1.8368e+06	918399	3	5.6E+06|7.2E+06|1.0E+07	2.29911e+07	7.6637e+06	3	0.0026	0.119838	0.5771	MQ	q	I
464	4104_ML_FinalNorm	AR-22Y-0000DHT	O43760	SYNGR2	Synaptogyrin-2 (Cellugyrin)	0.397646	1.1E+07|1.1E+07|1.2E+07	3.41135e+07	1.13712e+07	3	3.2E+06|3.5E+06|3.0E+06	9.67436e+06	3.22479e+06	3	1	3.52618	0	MQ	q	I
465	4104_ML_FinalNorm	AR-22Y-0060DHT	O43760	SYNGR2	Synaptogyrin-2 (Cellugyrin)	0.397646	8.7E+06|1.1E+07|1.1E+07	3.13501e+07	1.045e+07	3	3.2E+06|3.5E+06|3.0E+06	9.67436e+06	3.22479e+06	3	1	3.24053	0	MQ	q	I
466	4104_ML_FinalNorm	AR-WT-0000DHT	O43760	SYNGR2	Synaptogyrin-2 (Cellugyrin)	0.397646	2.0E+06|1.8E+06|1.7E+06	5.64181e+06	1.8806e+06	3	3.2E+06|3.5E+06|3.0E+06	9.67436e+06	3.22479e+06	3	0.0177	0.583172	0.4421	MQ	q	I
467	4104_ML_FinalNorm	AR-WT-0060DHT	O43760	SYNGR2	Synaptogyrin-2 (Cellugyrin)	0.397646	1.8E+06|1.5E+06|1.1E+06	4.38887e+06	1.46296e+06	3	3.2E+06|3.5E+06|3.0E+06	9.67436e+06	3.22479e+06	3	0.0121	0.45366	0.4822	MQ	q	I
468	4104_ML_FinalNorm	AR-WT-0000DHT	O43768	ENSA	Alpha-endosulfine (ARPP-19e)	0.788087	8.7E+06|7.3E+06|7.1E+06	2.30665e+07	7.68885e+06	3	2.9E+06|3.9E+06|4.7E+06	1.15354e+07	3.84513e+06	3	0.8671	1.99963	0.0079	MQ	q	I
469	4104_ML_FinalNorm	AR-WT-0060DHT	O43768	ENSA	Alpha-endosulfine (ARPP-19e)	0.788087	2.6E+06|5.9E+06|3.4E+06	1.18557e+07	3.95191e+06	3	2.9E+06|3.9E+06|4.7E+06	1.15354e+07	3.84513e+06	3	0.1259	1.02777	0.2511	MQ	q	I
470	4104_ML_FinalNorm	AR-22Y-0000DHT	O43776	NARS1	Asparagine--tRNA ligase, cytoplasmic (EC 6.1.1.22) (Asparaginyl-tRNA synthetase) (AsnRS) (Asparaginyl-tRNA synthetase 1)	0.796729	NAN|2.3E+07|1.9E+07	4.23232e+07	2.11616e+07	3	2.6E+05|2.4E+06|2.6E+06	5.2376e+06	1.74587e+06	3	0.5701	12.121	0.0804	MQ	q	I
471	4104_ML_FinalNorm	AR-22Y-0060DHT	O43776	NARS1	Asparagine--tRNA ligase, cytoplasmic (EC 6.1.1.22) (Asparaginyl-tRNA synthetase) (AsnRS) (Asparaginyl-tRNA synthetase 1)	0.796729	1.9E+07|1.8E+07|2.2E+07	5.88626e+07	1.96209e+07	3	2.6E+05|2.4E+06|2.6E+06	5.2376e+06	1.74587e+06	3	0.8391	11.2385	0.0101	MQ	q	I
472	4104_ML_FinalNorm	AR-WT-0000DHT	O43776	NARS1	Asparagine--tRNA ligase, cytoplasmic (EC 6.1.1.22) (Asparaginyl-tRNA synthetase) (AsnRS) (Asparaginyl-tRNA synthetase 1)	0.796729	1.6E+06|1.4E+06|1.3E+06	4.31998e+06	1.43999e+06	3	2.6E+05|2.4E+06|2.6E+06	5.2376e+06	1.74587e+06	3	0.2293	0.824803	0.2066	MQ	q	I
473	4104_ML_FinalNorm	AR-WT-0060DHT	O43776	NARS1	Asparagine--tRNA ligase, cytoplasmic (EC 6.1.1.22) (Asparaginyl-tRNA synthetase) (AsnRS) (Asparaginyl-tRNA synthetase 1)	0.796729	2.2E+06|2.3E+06|NAN	4.46571e+06	2.23285e+06	3	2.6E+05|2.4E+06|2.6E+06	5.2376e+06	1.74587e+06	3	0.1976	1.27894	0.219	MQ	q	I
474	4104_ML_FinalNorm	AR-22Y-0000DHT	O43795	MYO1B	Unconventional myosin-Ib (MYH-1c) (Myosin I alpha) (MMI-alpha) (MMIa)	0.927792	3.3E+06|6.2E+06|1.6E+07	2.53556e+07	8.45185e+06	3	3.0E+07|2.7E+07|3.0E+07	8.76736e+07	2.92245e+07	3	0.0087	0.289204	0.5083	MQ	q	I
475	4104_ML_FinalNorm	AR-22Y-0060DHT	O43795	MYO1B	Unconventional myosin-Ib (MYH-1c) (Myosin I alpha) (MMI-alpha) (MMIa)	0.927792	5.3E+06|1.0E+07|7.4E+06	2.29238e+07	7.64126e+06	3	3.0E+07|2.7E+07|3.0E+07	8.76736e+07	2.92245e+07	3	0.0073	0.261467	0.5222	MQ	q	I
476	4104_ML_FinalNorm	AR-WT-0000DHT	O43795	MYO1B	Unconventional myosin-Ib (MYH-1c) (Myosin I alpha) (MMI-alpha) (MMIa)	0.927792	6.1E+06|8.0E+05|5.6E+05	7.47669e+06	2.49223e+06	3	3.0E+07|2.7E+07|3.0E+07	8.76736e+07	2.92245e+07	3	0.0017	0.0852787	0.5923	MQ	q	I
477	4104_ML_FinalNorm	AR-WT-0060DHT	O43795	MYO1B	Unconventional myosin-Ib (MYH-1c) (Myosin I alpha) (MMI-alpha) (MMIa)	0.927792	1.7E+06|5.6E+05|3.0E+06	5.21008e+06	1.73669e+06	3	3.0E+07|2.7E+07|3.0E+07	8.76736e+07	2.92245e+07	3	0.0005	0.0594259	0.6148	MQ	q	I
478	4104_ML_FinalNorm	AR-22Y-0000DHT	O43809	NUDT21	Cleavage and polyadenylation specificity factor subunit 5 (Cleavage and polyadenylation specificity factor 25 kDa subunit) (CPSF 25 kDa subunit) (Cleavage factor Im complex 25 kDa subunit) (CFIm25) (Nucleoside diphosphate-linked moiety X motif 21) (Nudix motif 21) (Nudix hydrolase 21) (Pre-mRNA cleavage factor Im 68 kDa subunit)	0.94066	7.7E+06|1.9E+07|3.3E+07	6.03324e+07	2.01108e+07	3	4.0E+07|3.3E+07|4.0E+07	1.11951e+08	3.73168e+07	3	0.0117	0.538921	0.4855	MQ	q	I
479	4104_ML_FinalNorm	AR-22Y-0060DHT	O43809	NUDT21	Cleavage and polyadenylation specificity factor subunit 5 (Cleavage and polyadenylation specificity factor 25 kDa subunit) (CPSF 25 kDa subunit) (Cleavage factor Im complex 25 kDa subunit) (CFIm25) (Nucleoside diphosphate-linked moiety X motif 21) (Nudix motif 21) (Nudix hydrolase 21) (Pre-mRNA cleavage factor Im 68 kDa subunit)	0.94066	1.8E+07|1.1E+07|1.6E+07	4.51866e+07	1.50622e+07	3	4.0E+07|3.3E+07|4.0E+07	1.11951e+08	3.73168e+07	3	0.0052	0.40363	0.5437	MQ	q	I
480	4104_ML_FinalNorm	AR-WT-0000DHT	O43809	NUDT21	Cleavage and polyadenylation specificity factor subunit 5 (Cleavage and polyadenylation specificity factor 25 kDa subunit) (CPSF 25 kDa subunit) (Cleavage factor Im complex 25 kDa subunit) (CFIm25) (Nucleoside diphosphate-linked moiety X motif 21) (Nudix motif 21) (Nudix hydrolase 21) (Pre-mRNA cleavage factor Im 68 kDa subunit)	0.94066	3.6E+07|3.2E+07|3.4E+07	1.02976e+08	3.43254e+07	3	4.0E+07|3.3E+07|4.0E+07	1.11951e+08	3.73168e+07	3	0.0264	0.919836	0.3902	MQ	q	I
481	4104_ML_FinalNorm	AR-WT-0060DHT	O43809	NUDT21	Cleavage and polyadenylation specificity factor subunit 5 (Cleavage and polyadenylation specificity factor 25 kDa subunit) (CPSF 25 kDa subunit) (Cleavage factor Im complex 25 kDa subunit) (CFIm25) (Nucleoside diphosphate-linked moiety X motif 21) (Nudix motif 21) (Nudix hydrolase 21) (Pre-mRNA cleavage factor Im 68 kDa subunit)	0.94066	9.6E+07|9.3E+07|9.3E+07	2.82798e+08	9.4266e+07	3	4.0E+07|3.3E+07|4.0E+07	1.11951e+08	3.73168e+07	3	1	2.5261	0	MQ	q	I
482	4104_ML_FinalNorm	AR-22Y-0000DHT	O43823	AKAP8	A-kinase anchor protein 8 (AKAP-8) (A-kinase anchor protein 95 kDa) (AKAP 95)	0.781381	NAN|NAN|1.0E+07	1.04343e+07	1.04343e+07	3	5.0E+06|4.9E+06|6.8E+06	1.67017e+07	5.56724e+06	3	0.3251	1.87424	0.1766	MQ	q	I
483	4104_ML_FinalNorm	AR-22Y-0060DHT	O43823	AKAP8	A-kinase anchor protein 8 (AKAP-8) (A-kinase anchor protein 95 kDa) (AKAP 95)	0.781381	5.0E+07|1.8E+08|6.8E+07	2.93388e+08	9.77961e+07	3	5.0E+06|4.9E+06|6.8E+06	1.67017e+07	5.56724e+06	3	1	17.5664	0	MQ	q	I
484	4104_ML_FinalNorm	AR-WT-0000DHT	O43823	AKAP8	A-kinase anchor protein 8 (AKAP-8) (A-kinase anchor protein 95 kDa) (AKAP 95)	0.781381	7.8E+06|7.4E+06|8.1E+06	2.32469e+07	7.74895e+06	3	5.0E+06|4.9E+06|6.8E+06	1.67017e+07	5.56724e+06	3	0.261	1.39188	0.1958	MQ	q	I
485	4104_ML_FinalNorm	AR-WT-0060DHT	O43823	AKAP8	A-kinase anchor protein 8 (AKAP-8) (A-kinase anchor protein 95 kDa) (AKAP 95)	0.781381	2.7E+07|2.4E+07|1.9E+07	6.93557e+07	2.31186e+07	3	5.0E+06|4.9E+06|6.8E+06	1.67017e+07	5.56724e+06	3	1	4.15261	0	MQ	q	I
486	4104_ML_FinalNorm	AR-WT-0000DHT	O43826	SLC37A4	Glucose-6-phosphate exchanger SLC37A4 (Glucose-5-phosphate transporter) (Glucose-6-phosphate translocase) (Solute carrier family 37 member 4) (Transformation-related gene 19 protein) (TRG-19)	0	1.1E+06|1.7E+06|1.7E+06	4.48604e+06	1.49535e+06	3	1.4E+06|1.3E+06|1.2E+06	3.90279e+06	1.30093e+06	3	0.1096	1.14944	0.259	MQ	q	I
487	4104_ML_FinalNorm	AR-WT-0060DHT	O43826	SLC37A4	Glucose-6-phosphate exchanger SLC37A4 (Glucose-5-phosphate transporter) (Glucose-6-phosphate translocase) (Solute carrier family 37 member 4) (Transformation-related gene 19 protein) (TRG-19)	0	7.8E+05|1.4E+06|1.0E+06	3.23619e+06	1.07873e+06	3	1.4E+06|1.3E+06|1.2E+06	3.90279e+06	1.30093e+06	3	0.022	0.8292	0.4153	MQ	q	I
488	4104_ML_FinalNorm	AR-22Y-0000DHT	O43865	AHCYL1	S-adenosylhomocysteine hydrolase-like protein 1 (DC-expressed AHCY-like molecule) (IP(3)Rs binding protein released with IP(3)) (IRBIT) (Putative adenosylhomocysteinase 2) (S-adenosyl-L-homocysteine hydrolase 2) (AdoHcyase 2)	0.691103	2.5E+07|5.7E+06|6.7E+06	3.73484e+07	1.24495e+07	3	1.2E+07|1.4E+07|9.5E+06	3.52375e+07	1.17458e+07	3	0.3438	1.0599	0.1413	MQ	q	I
489	4104_ML_FinalNorm	AR-22Y-0060DHT	O43865	AHCYL1	S-adenosylhomocysteine hydrolase-like protein 1 (DC-expressed AHCY-like molecule) (IP(3)Rs binding protein released with IP(3)) (IRBIT) (Putative adenosylhomocysteinase 2) (S-adenosyl-L-homocysteine hydrolase 2) (AdoHcyase 2)	0.691103	4.6E+06|3.4E+06|4.9E+06	1.28688e+07	4.28961e+06	3	1.2E+07|1.4E+07|9.5E+06	3.52375e+07	1.17458e+07	3	0.0108	0.365202	0.4922	MQ	q	I
490	4104_ML_FinalNorm	AR-WT-0000DHT	O43865	AHCYL1	S-adenosylhomocysteine hydrolase-like protein 1 (DC-expressed AHCY-like molecule) (IP(3)Rs binding protein released with IP(3)) (IRBIT) (Putative adenosylhomocysteinase 2) (S-adenosyl-L-homocysteine hydrolase 2) (AdoHcyase 2)	0.691103	3.1E+07|3.4E+07|3.6E+07	1.00036e+08	3.33452e+07	3	1.2E+07|1.4E+07|9.5E+06	3.52375e+07	1.17458e+07	3	1	2.83889	0	MQ	q	I
491	4104_ML_FinalNorm	AR-WT-0060DHT	O43865	AHCYL1	S-adenosylhomocysteine hydrolase-like protein 1 (DC-expressed AHCY-like molecule) (IP(3)Rs binding protein released with IP(3)) (IRBIT) (Putative adenosylhomocysteinase 2) (S-adenosyl-L-homocysteine hydrolase 2) (AdoHcyase 2)	0.691103	3.7E+07|4.0E+07|3.0E+07	1.06855e+08	3.56183e+07	3	1.2E+07|1.4E+07|9.5E+06	3.52375e+07	1.17458e+07	3	1	3.03242	0	MQ	q	I
492	4104_ML_FinalNorm	AR-WT-0000DHT	O43896	KIF1C	Kinesin-like protein KIF1C	0.691562	8.5E+05|1.0E+06|7.7E+05	2.62053e+06	873511	3	8.0E+03|7.1E+03|9.4E+03	24568.1	8189.37	3	1	106.664	0	MQ	q	I
493	4104_ML_FinalNorm	AR-WT-0060DHT	O43896	KIF1C	Kinesin-like protein KIF1C	0.691562	6.0E+05|NAN|NAN	600249	600249	3	8.0E+03|7.1E+03|9.4E+03	24568.1	8189.37	3	0.3333	73.2961	0.1476	MQ	q	I
494	4104_ML_FinalNorm	AR-WT-0000DHT	O60244	MED14	Mediator of RNA polymerase II transcription subunit 14 (Activator-recruited cofactor 150 kDa component) (ARC150) (Cofactor required for Sp1 transcriptional activation subunit 2) (CRSP complex subunit 2) (Mediator complex subunit 14) (RGR1 homolog) (hRGR1) (Thyroid hormone receptor-associated protein complex 170 kDa component) (Trap170) (Transcriptional coactivator CRSP150) (Vitamin D3 receptor-in…	0.528816	NAN|NAN|3.1E+06	3.07083e+06	3.07083e+06	3	NAN|1.7E+06|2.6E+06	4.31246e+06	2.15623e+06	3	0.1028	1.42417	0.2633	MQ	q	I
495	4104_ML_FinalNorm	AR-WT-0060DHT	O60244	MED14	Mediator of RNA polymerase II transcription subunit 14 (Activator-recruited cofactor 150 kDa component) (ARC150) (Cofactor required for Sp1 transcriptional activation subunit 2) (CRSP complex subunit 2) (Mediator complex subunit 14) (RGR1 homolog) (hRGR1) (Thyroid hormone receptor-associated protein complex 170 kDa component) (Trap170) (Transcriptional coactivator CRSP150) (Vitamin D3 receptor-in…	0.528816	1.8E+06|2.8E+06|2.3E+06	6.82774e+06	2.27591e+06	3	NAN|1.7E+06|2.6E+06	4.31246e+06	2.15623e+06	3	0.1011	1.05551	0.2646	MQ	q	I
496	4104_ML_FinalNorm	AR-22Y-0000DHT	O60264	SMARCA5	SWI/SNF-related matrix-associated actin-dependent regulator of chromatin subfamily A member 5 (SWI/SNF-related matrix-associated actin-dependent regulator of chromatin A5) (EC 3.6.4.-) (Sucrose nonfermenting protein 2 homolog) (hSNF2H)	0.935874	1.8E+06|NAN|NAN	1.81675e+06	1.81675e+06	3	1.6E+07|1.3E+07|1.5E+07	4.31956e+07	1.43985e+07	3	0	0.126176	0.6339	MQ	q	I
497	4104_ML_FinalNorm	AR-WT-0000DHT	O60264	SMARCA5	SWI/SNF-related matrix-associated actin-dependent regulator of chromatin subfamily A member 5 (SWI/SNF-related matrix-associated actin-dependent regulator of chromatin A5) (EC 3.6.4.-) (Sucrose nonfermenting protein 2 homolog) (hSNF2H)	0.935874	NAN|3.1E+05|NAN	309513	309513	3	1.6E+07|1.3E+07|1.5E+07	4.31956e+07	1.43985e+07	3	0	0.0214962	0.6339	MQ	q	I
498	4104_ML_FinalNorm	AR-WT-0060DHT	O60264	SMARCA5	SWI/SNF-related matrix-associated actin-dependent regulator of chromatin subfamily A member 5 (SWI/SNF-related matrix-associated actin-dependent regulator of chromatin A5) (EC 3.6.4.-) (Sucrose nonfermenting protein 2 homolog) (hSNF2H)	0.935874	5.4E+05|4.1E+05|NAN	954170	477085	3	1.6E+07|1.3E+07|1.5E+07	4.31956e+07	1.43985e+07	3	0	0.0331343	0.6339	MQ	q	I
499	4104_ML_FinalNorm	AR-22Y-0000DHT	O60271	SPAG9	C-Jun-amino-terminal kinase-interacting protein 4 (JIP-4) (JNK-interacting protein 4) (Cancer/testis antigen 89) (CT89) (Human lung cancer oncogene 6 protein) (HLC-6) (JNK-associated leucine-zipper protein) (JLP) (Mitogen-activated protein kinase 8-interacting protein 4) (Proliferation-inducing protein 6) (Protein highly expressed in testis) (PHET) (Sperm surface protein) (Sperm-associated antige…	0.888651	2.3E+07|1.6E+07|2.6E+07	6.56948e+07	2.18983e+07	3	4.6E+08|5.4E+08|5.7E+08	1.572e+09	5.24e+08	3	0.0031	0.0417906	0.5692	MQ	q	I
500	4104_ML_FinalNorm	AR-22Y-0060DHT	O60271	SPAG9	C-Jun-amino-terminal kinase-interacting protein 4 (JIP-4) (JNK-interacting protein 4) (Cancer/testis antigen 89) (CT89) (Human lung cancer oncogene 6 protein) (HLC-6) (JNK-associated leucine-zipper protein) (JLP) (Mitogen-activated protein kinase 8-interacting protein 4) (Proliferation-inducing protein 6) (Protein highly expressed in testis) (PHET) (Sperm surface protein) (Sperm-associated antige…	0.888651	1.6E+07|2.6E+07|1.5E+07	5.64097e+07	1.88032e+07	3	4.6E+08|5.4E+08|5.7E+08	1.572e+09	5.24e+08	3	0.0026	0.0358841	0.5771	MQ	q	I
501	4104_ML_FinalNorm	AR-WT-0000DHT	O60271	SPAG9	C-Jun-amino-terminal kinase-interacting protein 4 (JIP-4) (JNK-interacting protein 4) (Cancer/testis antigen 89) (CT89) (Human lung cancer oncogene 6 protein) (HLC-6) (JNK-associated leucine-zipper protein) (JLP) (Mitogen-activated protein kinase 8-interacting protein 4) (Proliferation-inducing protein 6) (Protein highly expressed in testis) (PHET) (Sperm surface protein) (Sperm-associated antige…	0.888651	6.9E+08|6.3E+08|7.1E+08	2.02417e+09	6.74724e+08	3	4.6E+08|5.4E+08|5.7E+08	1.572e+09	5.24e+08	3	0.138	1.28764	0.2462	MQ	q	I
502	4104_ML_FinalNorm	AR-WT-0060DHT	O60271	SPAG9	C-Jun-amino-terminal kinase-interacting protein 4 (JIP-4) (JNK-interacting protein 4) (Cancer/testis antigen 89) (CT89) (Human lung cancer oncogene 6 protein) (HLC-6) (JNK-associated leucine-zipper protein) (JLP) (Mitogen-activated protein kinase 8-interacting protein 4) (Proliferation-inducing protein 6) (Protein highly expressed in testis) (PHET) (Sperm surface protein) (Sperm-associated antige…	0.888651	4.0E+08|4.5E+08|4.3E+08	1.27727e+09	4.25757e+08	3	4.6E+08|5.4E+08|5.7E+08	1.572e+09	5.24e+08	3	0.0296	0.812514	0.3756	MQ	q	I
503	4104_ML_FinalNorm	AR-22Y-0060DHT	O60292	SIPA1L3	Signal-induced proliferation-associated 1-like protein 3 (SIPA1-like protein 3) (SPA-1-like protein 3)	0.610006	3.8E+06|NAN|NAN	3.84792e+06	3.84792e+06	3	5.0E+06|8.0E+06|5.6E+06	1.8554e+07	6.18467e+06	3	0.0052	0.622171	0.5437	MQ	q	I
504	4104_ML_FinalNorm	AR-WT-0000DHT	O60292	SIPA1L3	Signal-induced proliferation-associated 1-like protein 3 (SIPA1-like protein 3) (SPA-1-like protein 3)	0.610006	1.1E+07|1.0E+07|1.1E+07	3.17081e+07	1.05694e+07	3	5.0E+06|8.0E+06|5.6E+06	1.8554e+07	6.18467e+06	3	0.5942	1.70896	0.0763	MQ	q	I
505	4104_ML_FinalNorm	AR-WT-0060DHT	O60292	SIPA1L3	Signal-induced proliferation-associated 1-like protein 3 (SIPA1-like protein 3) (SPA-1-like protein 3)	0.610006	6.2E+06|5.8E+06|5.0E+06	1.71013e+07	5.70045e+06	3	5.0E+06|8.0E+06|5.6E+06	1.8554e+07	6.18467e+06	3	0.0356	0.921706	0.3519	MQ	q	I
506	4104_ML_FinalNorm	AR-WT-0000DHT	O60306	AQR	RNA helicase aquarius (EC 3.6.4.13) (Intron-binding protein of 160 kDa) (IBP160)	0.831135	2.4E+07|1.8E+07|1.8E+07	6.04573e+07	2.01524e+07	3	2.7E+06|1.2E+06|1.7E+06	5.57098e+06	1.85699e+06	3	1	10.8522	0	MQ	q	I
507	4104_ML_FinalNorm	AR-WT-0060DHT	O60306	AQR	RNA helicase aquarius (EC 3.6.4.13) (Intron-binding protein of 160 kDa) (IBP160)	0.831135	4.5E+07|4.3E+07|4.0E+07	1.28113e+08	4.27043e+07	3	2.7E+06|1.2E+06|1.7E+06	5.57098e+06	1.85699e+06	3	1	22.9965	0	MQ	q	I
508	4104_ML_FinalNorm	AR-22Y-0060DHT	O60313	OPA1	Dynamin-like 120 kDa protein, mitochondrial (EC 3.6.5.5) (Optic atrophy protein 1) [Cleaved into: Dynamin-like 120 kDa protein, form S1]	0.6839	1.2E+06|NAN|NAN	1.2399e+06	1.2399e+06	3	3.8E+06|4.3E+06|3.8E+06	1.18446e+07	3.9482e+06	3	0.0005	0.314043	0.6148	MQ	q	I
509	4104_ML_FinalNorm	AR-WT-0000DHT	O60313	OPA1	Dynamin-like 120 kDa protein, mitochondrial (EC 3.6.5.5) (Optic atrophy protein 1) [Cleaved into: Dynamin-like 120 kDa protein, form S1]	0.6839	2.3E+06|2.0E+06|2.5E+06	6.87654e+06	2.29218e+06	3	3.8E+06|4.3E+06|3.8E+06	1.18446e+07	3.9482e+06	3	0.0084	0.580563	0.5111	MQ	q	I
510	4104_ML_FinalNorm	AR-WT-0060DHT	O60313	OPA1	Dynamin-like 120 kDa protein, mitochondrial (EC 3.6.5.5) (Optic atrophy protein 1) [Cleaved into: Dynamin-like 120 kDa protein, form S1]	0.6839	1.4E+06|2.0E+06|1.7E+06	5.14077e+06	1.71359e+06	3	3.8E+06|4.3E+06|3.8E+06	1.18446e+07	3.9482e+06	3	0.004	0.434018	0.5576	MQ	q	I
511	4104_ML_FinalNorm	AR-22Y-0000DHT	O60318	MCM3AP	Germinal-center associated nuclear protein (GANP) (EC 2.3.1.48) (80 kDa MCM3-associated protein) (MCM3 acetylating protein) (MCM3AP) (EC 2.3.1.-) (MCM3 acetyltransferase)	0	NAN|8.4E+06|8.0E+06	1.63908e+07	8.19541e+06	3	7.1E+03|7.8E+03|1.2E+04	26768.1	8922.71	3	0.6667	918.489	0.0404	MQ	q	I
512	4104_ML_FinalNorm	AR-22Y-0060DHT	O60318	MCM3AP	Germinal-center associated nuclear protein (GANP) (EC 2.3.1.48) (80 kDa MCM3-associated protein) (MCM3 acetylating protein) (MCM3AP) (EC 2.3.1.-) (MCM3 acetyltransferase)	0	2.9E+07|3.7E+07|3.0E+07	9.62222e+07	3.20741e+07	3	7.1E+03|7.8E+03|1.2E+04	26768.1	8922.71	3	1	3594.66	0	MQ	q	I
513	4104_ML_FinalNorm	AR-WT-0000DHT	O60318	MCM3AP	Germinal-center associated nuclear protein (GANP) (EC 2.3.1.48) (80 kDa MCM3-associated protein) (MCM3 acetylating protein) (MCM3AP) (EC 2.3.1.-) (MCM3 acetyltransferase)	0	3.9E+05|2.1E+06|6.3E+05	3.15403e+06	1.05134e+06	3	7.1E+03|7.8E+03|1.2E+04	26768.1	8922.71	3	1	117.828	0	MQ	q	I
514	4104_ML_FinalNorm	AR-WT-0060DHT	O60318	MCM3AP	Germinal-center associated nuclear protein (GANP) (EC 2.3.1.48) (80 kDa MCM3-associated protein) (MCM3 acetylating protein) (MCM3AP) (EC 2.3.1.-) (MCM3 acetyltransferase)	0	NAN|1.2E+06|NAN	1.20447e+06	1.20447e+06	3	7.1E+03|7.8E+03|1.2E+04	26768.1	8922.71	3	0.3333	134.99	0.1476	MQ	q	I
515	4104_ML_FinalNorm	AR-22Y-0000DHT	O60341	KDM1A	Lysine-specific histone demethylase 1A (EC 1.14.99.66) (BRAF35-HDAC complex protein BHC110) (Flavin-containing amine oxidase domain-containing protein 2) ([histone H3]-dimethyl-L-lysine(4) FAD-dependent demethylase 1A)	0.840663	NAN|2.1E+06|2.0E+06	4.16362e+06	2.08181e+06	3	8.4E+06|7.3E+06|7.1E+06	2.28047e+07	7.60156e+06	3	0.0082	0.273866	0.5137	MQ	q	I
516	4104_ML_FinalNorm	AR-22Y-0060DHT	O60341	KDM1A	Lysine-specific histone demethylase 1A (EC 1.14.99.66) (BRAF35-HDAC complex protein BHC110) (Flavin-containing amine oxidase domain-containing protein 2) ([histone H3]-dimethyl-L-lysine(4) FAD-dependent demethylase 1A)	0.840663	1.9E+07|2.0E+07|3.1E+07	6.95615e+07	2.31872e+07	3	8.4E+06|7.3E+06|7.1E+06	2.28047e+07	7.60156e+06	3	1	3.05032	0	MQ	q	I
517	4104_ML_FinalNorm	AR-WT-0000DHT	O60341	KDM1A	Lysine-specific histone demethylase 1A (EC 1.14.99.66) (BRAF35-HDAC complex protein BHC110) (Flavin-containing amine oxidase domain-containing protein 2) ([histone H3]-dimethyl-L-lysine(4) FAD-dependent demethylase 1A)	0.840663	1.9E+06|2.5E+05|2.2E+06	4.37775e+06	1.45925e+06	3	8.4E+06|7.3E+06|7.1E+06	2.28047e+07	7.60156e+06	3	0.0083	0.191967	0.5126	MQ	q	I
518	4104_ML_FinalNorm	AR-WT-0060DHT	O60341	KDM1A	Lysine-specific histone demethylase 1A (EC 1.14.99.66) (BRAF35-HDAC complex protein BHC110) (Flavin-containing amine oxidase domain-containing protein 2) ([histone H3]-dimethyl-L-lysine(4) FAD-dependent demethylase 1A)	0.840663	4.6E+06|5.9E+06|3.6E+06	1.41046e+07	4.70155e+06	3	8.4E+06|7.3E+06|7.1E+06	2.28047e+07	7.60156e+06	3	0.0254	0.618498	0.3962	MQ	q	I
519	4104_ML_FinalNorm	AR-WT-0000DHT	O60422	ONECUT3	One cut domain family member 3 (One cut homeobox 3) (Transcription factor ONECUT-3) (OC-3)	0	8.5E+06|8.2E+06|4.7E+06	2.14261e+07	7.14205e+06	3	6.4E+03|8.4E+03|1.2E+04	26952.1	8984.02	3	1	794.972	0	MQ	q	I
520	4104_ML_FinalNorm	AR-WT-0060DHT	O60422	ONECUT3	One cut domain family member 3 (One cut homeobox 3) (Transcription factor ONECUT-3) (OC-3)	0	1.2E+08|1.1E+08|1.2E+08	3.51497e+08	1.17166e+08	3	6.4E+03|8.4E+03|1.2E+04	26952.1	8984.02	3	1	13041.6	0	MQ	q	I
521	4104_ML_FinalNorm	AR-22Y-0000DHT	O60437	PPL	Periplakin (190 kDa paraneoplastic pemphigus antigen) (195 kDa cornified envelope precursor protein)	0.492991	4.6E+06|NAN|1.0E+07	1.48713e+07	7.43563e+06	3	3.0E+07|2.7E+07|3.0E+07	8.60903e+07	2.86968e+07	3	0.0009	0.25911	0.6054	MQ	q	I
522	4104_ML_FinalNorm	AR-22Y-0060DHT	O60437	PPL	Periplakin (190 kDa paraneoplastic pemphigus antigen) (195 kDa cornified envelope precursor protein)	0.492991	1.5E+07|4.7E+06|2.0E+06	2.18625e+07	7.28749e+06	3	3.0E+07|2.7E+07|3.0E+07	8.60903e+07	2.86968e+07	3	0.0025	0.253948	0.579	MQ	q	I
523	4104_ML_FinalNorm	AR-WT-0000DHT	O60437	PPL	Periplakin (190 kDa paraneoplastic pemphigus antigen) (195 kDa cornified envelope precursor protein)	0.492991	2.4E+07|2.3E+07|2.4E+07	7.02939e+07	2.34313e+07	3	3.0E+07|2.7E+07|3.0E+07	8.60903e+07	2.86968e+07	3	0.0192	0.816513	0.4333	MQ	q	I
524	4104_ML_FinalNorm	AR-WT-0060DHT	O60437	PPL	Periplakin (190 kDa paraneoplastic pemphigus antigen) (195 kDa cornified envelope precursor protein)	0.492991	9.7E+06|1.0E+07|1.0E+07	2.96168e+07	9.87228e+06	3	3.0E+07|2.7E+07|3.0E+07	8.60903e+07	2.86968e+07	3	0.0023	0.344021	0.5825	MQ	q	I
525	4104_ML_FinalNorm	AR-WT-0000DHT	O60443	GSDME	Gasdermin-E (Inversely correlated with estrogen receptor expression 1) (ICERE-1) (Non-syndromic hearing impairment protein 5) [Cleaved into: Gasdermin-E, N-terminal (GSDME-NT); Gasdermin-E, C-terminal (GSDME-CT)]	0	3.0E+06|2.6E+06|2.9E+06	8.43766e+06	2.81255e+06	3	1.4E+06|1.3E+06|2.5E+06	5.2251e+06	1.7417e+06	3	0.2977	1.61483	0.1841	MQ	q	I
526	4104_ML_FinalNorm	AR-WT-0060DHT	O60443	GSDME	Gasdermin-E (Inversely correlated with estrogen receptor expression 1) (ICERE-1) (Non-syndromic hearing impairment protein 5) [Cleaved into: Gasdermin-E, N-terminal (GSDME-NT); Gasdermin-E, C-terminal (GSDME-CT)]	0	1.9E+06|1.9E+06|2.0E+06	5.85248e+06	1.95083e+06	3	1.4E+06|1.3E+06|2.5E+06	5.2251e+06	1.7417e+06	3	0.0798	1.12007	0.2822	MQ	q	I
527	4104_ML_FinalNorm	AR-22Y-0000DHT	O60493	SNX3	Sorting nexin-3 (Protein SDP3)	0.65235	3.1E+06|3.8E+06|6.5E+06	1.3458e+07	4.486e+06	3	4.6E+06|4.4E+06|3.1E+06	1.21444e+07	4.04813e+06	3	0.1958	1.10817	0.2195	MQ	q	I
528	4104_ML_FinalNorm	AR-22Y-0060DHT	O60493	SNX3	Sorting nexin-3 (Protein SDP3)	0.65235	NAN|1.4E+06|3.1E+06	4.51875e+06	2.25938e+06	3	4.6E+06|4.4E+06|3.1E+06	1.21444e+07	4.04813e+06	3	0.0082	0.558129	0.5137	MQ	q	I
529	4104_ML_FinalNorm	AR-WT-0000DHT	O60493	SNX3	Sorting nexin-3 (Protein SDP3)	0.65235	1.8E+06|2.3E+06|2.0E+06	6.14501e+06	2.04834e+06	3	4.6E+06|4.4E+06|3.1E+06	1.21444e+07	4.04813e+06	3	0.0084	0.505997	0.5111	MQ	q	I
530	4104_ML_FinalNorm	AR-WT-0060DHT	O60493	SNX3	Sorting nexin-3 (Protein SDP3)	0.65235	1.9E+06|3.5E+06|1.9E+06	7.27409e+06	2.4247e+06	3	4.6E+06|4.4E+06|3.1E+06	1.21444e+07	4.04813e+06	3	0.0137	0.598968	0.4701	MQ	q	I
531	4104_ML_FinalNorm	AR-22Y-0000DHT	O60506	SYNCRIP	Heterogeneous nuclear ribonucleoprotein Q (hnRNP Q) (Glycine- and tyrosine-rich RNA-binding protein) (GRY-RBP) (NS1-associated protein 1) (Synaptotagmin-binding, cytoplasmic RNA-interacting protein)	0.975008	5.1E+07|6.5E+07|9.6E+07	2.12804e+08	7.09347e+07	3	9.1E+07|7.5E+07|1.0E+08	2.66318e+08	8.87726e+07	3	0.0317	0.799061	0.3656	MQ	q	I
532	4104_ML_FinalNorm	AR-22Y-0060DHT	O60506	SYNCRIP	Heterogeneous nuclear ribonucleoprotein Q (hnRNP Q) (Glycine- and tyrosine-rich RNA-binding protein) (GRY-RBP) (NS1-associated protein 1) (Synaptotagmin-binding, cytoplasmic RNA-interacting protein)	0.975008	1.9E+07|1.9E+07|3.6E+07	7.27428e+07	2.42476e+07	3	9.1E+07|7.5E+07|1.0E+08	2.66318e+08	8.87726e+07	3	0.0103	0.273143	0.4956	MQ	q	I
533	4104_ML_FinalNorm	AR-WT-0000DHT	O60506	SYNCRIP	Heterogeneous nuclear ribonucleoprotein Q (hnRNP Q) (Glycine- and tyrosine-rich RNA-binding protein) (GRY-RBP) (NS1-associated protein 1) (Synaptotagmin-binding, cytoplasmic RNA-interacting protein)	0.975008	6.0E+06|6.4E+06|4.5E+06	1.69582e+07	5.65274e+06	3	9.1E+07|7.5E+07|1.0E+08	2.66318e+08	8.87726e+07	3	0.001	0.0636766	0.6034	MQ	q	I
534	4104_ML_FinalNorm	AR-WT-0060DHT	O60506	SYNCRIP	Heterogeneous nuclear ribonucleoprotein Q (hnRNP Q) (Glycine- and tyrosine-rich RNA-binding protein) (GRY-RBP) (NS1-associated protein 1) (Synaptotagmin-binding, cytoplasmic RNA-interacting protein)	0.975008	5.7E+06|6.0E+06|1.7E+06	1.34095e+07	4.46983e+06	3	9.1E+07|7.5E+07|1.0E+08	2.66318e+08	8.87726e+07	3	0.0007	0.0503515	0.6098	MQ	q	I
535	4104_ML_FinalNorm	AR-22Y-0000DHT	O60563	CCNT1	Cyclin-T1 (CycT1) (Cyclin-T)	0.855228	6.2E+06|8.9E+06|5.4E+06	2.03978e+07	6.79927e+06	3	6.5E+06|6.5E+06|6.6E+06	1.96219e+07	6.54063e+06	3	0.0973	1.03954	0.2669	MQ	q	I
536	4104_ML_FinalNorm	AR-22Y-0060DHT	O60563	CCNT1	Cyclin-T1 (CycT1) (Cyclin-T)	0.855228	6.1E+07|6.5E+07|6.1E+07	1.8694e+08	6.23135e+07	3	6.5E+06|6.5E+06|6.6E+06	1.96219e+07	6.54063e+06	3	1	9.52713	0	MQ	q	I
537	4104_ML_FinalNorm	AR-WT-0000DHT	O60563	CCNT1	Cyclin-T1 (CycT1) (Cyclin-T)	0.855228	1.5E+07|1.5E+07|1.1E+07	4.10187e+07	1.36729e+07	3	6.5E+06|6.5E+06|6.6E+06	1.96219e+07	6.54063e+06	3	0.9752	2.09046	0.0013	MQ	q	I
538	4104_ML_FinalNorm	AR-WT-0060DHT	O60563	CCNT1	Cyclin-T1 (CycT1) (Cyclin-T)	0.855228	2.5E+07|2.4E+07|2.2E+07	7.03232e+07	2.34411e+07	3	6.5E+06|6.5E+06|6.6E+06	1.96219e+07	6.54063e+06	3	1	3.58392	0	MQ	q	I
539	4104_ML_FinalNorm	AR-WT-0000DHT	O60566	BUB1B	Mitotic checkpoint serine/threonine-protein kinase BUB1 beta (EC 2.7.11.1) (MAD3/BUB1-related protein kinase) (hBUBR1) (Mitotic checkpoint kinase MAD3L) (Protein SSK1)	0.791096	8.6E+06|9.3E+06|9.9E+06	2.78027e+07	9.26756e+06	3	2.3E+06|8.3E+05|1.5E+06	4.6409e+06	1.54697e+06	3	0.9965	5.99079	0.0001	MQ	q	I
540	4104_ML_FinalNorm	AR-WT-0060DHT	O60566	BUB1B	Mitotic checkpoint serine/threonine-protein kinase BUB1 beta (EC 2.7.11.1) (MAD3/BUB1-related protein kinase) (hBUBR1) (Mitotic checkpoint kinase MAD3L) (Protein SSK1)	0.791096	3.3E+06|3.9E+06|4.1E+06	1.11951e+07	3.7317e+06	3	2.3E+06|8.3E+05|1.5E+06	4.6409e+06	1.54697e+06	3	0.6221	2.41227	0.0717	MQ	q	I
541	4104_ML_FinalNorm	AR-22Y-0000DHT	O60573	EIF4E2	Eukaryotic translation initiation factor 4E type 2 (eIF-4E type 2) (eIF4E type 2) (Eukaryotic translation initiation factor 4E homologous protein) (Eukaryotic translation initiation factor 4E-like 3) (eIF4E-like protein 4E-LP) (mRNA cap-binding protein 4EHP) (h4EHP) (mRNA cap-binding protein type 3)	0.840327	2.1E+06|1.8E+06|NAN	3.9732e+06	1.9866e+06	3	1.0E+07|1.3E+07|1.2E+07	3.52994e+07	1.17665e+07	3	0.0005	0.168836	0.6148	MQ	q	I
542	4104_ML_FinalNorm	AR-WT-0000DHT	O60573	EIF4E2	Eukaryotic translation initiation factor 4E type 2 (eIF-4E type 2) (eIF4E type 2) (Eukaryotic translation initiation factor 4E homologous protein) (Eukaryotic translation initiation factor 4E-like 3) (eIF4E-like protein 4E-LP) (mRNA cap-binding protein 4EHP) (h4EHP) (mRNA cap-binding protein type 3)	0.840327	1.3E+07|1.0E+07|1.3E+07	3.67598e+07	1.22533e+07	3	1.0E+07|1.3E+07|1.2E+07	3.52994e+07	1.17665e+07	3	0.0408	1.04137	0.339	MQ	q	I
543	4104_ML_FinalNorm	AR-WT-0060DHT	O60573	EIF4E2	Eukaryotic translation initiation factor 4E type 2 (eIF-4E type 2) (eIF4E type 2) (Eukaryotic translation initiation factor 4E homologous protein) (Eukaryotic translation initiation factor 4E-like 3) (eIF4E-like protein 4E-LP) (mRNA cap-binding protein 4EHP) (h4EHP) (mRNA cap-binding protein type 3)	0.840327	1.6E+07|1.9E+07|1.4E+07	4.87312e+07	1.62437e+07	3	1.0E+07|1.3E+07|1.2E+07	3.52994e+07	1.17665e+07	3	0.3847	1.38051	0.1215	MQ	q	I
544	4104_ML_FinalNorm	AR-22Y-0000DHT	O60610	DIAPH1	Protein diaphanous homolog 1 (Diaphanous-related formin-1) (DRF1)	0.84636	NAN|NAN|3.2E+07	3.23956e+07	3.23956e+07	3	1.1E+07|1.1E+07|1.9E+07	4.06395e+07	1.35465e+07	3	0.3102	2.39143	0.1809	MQ	q	I
545	4104_ML_FinalNorm	AR-WT-0000DHT	O60610	DIAPH1	Protein diaphanous homolog 1 (Diaphanous-related formin-1) (DRF1)	0.84636	5.7E+06|1.1E+07|6.1E+06	2.2747e+07	7.58232e+06	3	1.1E+07|1.1E+07|1.9E+07	4.06395e+07	1.35465e+07	3	0.0176	0.559725	0.4433	MQ	q	I
546	4104_ML_FinalNorm	AR-WT-0060DHT	O60610	DIAPH1	Protein diaphanous homolog 1 (Diaphanous-related formin-1) (DRF1)	0.84636	2.7E+06|1.0E+07|1.1E+07	2.35489e+07	7.84963e+06	3	1.1E+07|1.1E+07|1.9E+07	4.06395e+07	1.35465e+07	3	0.0223	0.579458	0.4133	MQ	q	I
547	4104_ML_FinalNorm	AR-22Y-0000DHT	O60664	PLIN3	Perilipin-3 (47 kDa mannose 6-phosphate receptor-binding protein) (47 kDa MPR-binding protein) (Cargo selection protein TIP47) (Mannose-6-phosphate receptor-binding protein 1) (Placental protein 17) (PP17)	0.837046	4.3E+06|1.3E+07|7.0E+06	2.4482e+07	8.16066e+06	3	1.2E+08|1.3E+08|1.3E+08	3.79198e+08	1.26399e+08	3	0.0027	0.0645625	0.5756	MQ	q	I
548	4104_ML_FinalNorm	AR-22Y-0060DHT	O60664	PLIN3	Perilipin-3 (47 kDa mannose 6-phosphate receptor-binding protein) (47 kDa MPR-binding protein) (Cargo selection protein TIP47) (Mannose-6-phosphate receptor-binding protein 1) (Placental protein 17) (PP17)	0.837046	5.9E+06|4.7E+06|6.3E+06	1.69407e+07	5.6469e+06	3	1.2E+08|1.3E+08|1.3E+08	3.79198e+08	1.26399e+08	3	0.0015	0.0446751	0.5948	MQ	q	I
549	4104_ML_FinalNorm	AR-WT-0000DHT	O60664	PLIN3	Perilipin-3 (47 kDa mannose 6-phosphate receptor-binding protein) (47 kDa MPR-binding protein) (Cargo selection protein TIP47) (Mannose-6-phosphate receptor-binding protein 1) (Placental protein 17) (PP17)	0.837046	1.3E+08|1.3E+08|1.2E+08	3.71661e+08	1.23887e+08	3	1.2E+08|1.3E+08|1.3E+08	3.79198e+08	1.26399e+08	3	0.0337	0.980123	0.3579	MQ	q	I
550	4104_ML_FinalNorm	AR-WT-0060DHT	O60664	PLIN3	Perilipin-3 (47 kDa mannose 6-phosphate receptor-binding protein) (47 kDa MPR-binding protein) (Cargo selection protein TIP47) (Mannose-6-phosphate receptor-binding protein 1) (Placental protein 17) (PP17)	0.837046	8.5E+07|9.4E+07|8.2E+07	2.62083e+08	8.73609e+07	3	1.2E+08|1.3E+08|1.3E+08	3.79198e+08	1.26399e+08	3	0.0281	0.69115	0.3817	MQ	q	I
551	4104_ML_FinalNorm	AR-22Y-0000DHT	O60684	KPNA6	Importin subunit alpha-7 (Karyopherin subunit alpha-6)	0.850819	3.5E+06|3.5E+06|4.0E+06	1.09539e+07	3.6513e+06	3	7.3E+06|5.4E+06|7.1E+06	1.98103e+07	6.60344e+06	3	0.0195	0.552939	0.4311	MQ	q	I
552	4104_ML_FinalNorm	AR-22Y-0060DHT	O60684	KPNA6	Importin subunit alpha-7 (Karyopherin subunit alpha-6)	0.850819	NAN|6.1E+06|7.5E+06	1.36425e+07	6.82124e+06	3	7.3E+06|5.4E+06|7.1E+06	1.98103e+07	6.60344e+06	3	0.0303	1.03298	0.3715	MQ	q	I
553	4104_ML_FinalNorm	AR-WT-0060DHT	O60684	KPNA6	Importin subunit alpha-7 (Karyopherin subunit alpha-6)	0.850819	5.9E+05|5.5E+05|6.2E+05	1.75829e+06	586096	3	7.3E+06|5.4E+06|7.1E+06	1.98103e+07	6.60344e+06	3	0.0007	0.0887562	0.6098	MQ	q	I
554	4104_ML_FinalNorm	AR-22Y-0000DHT	O60701	UGDH	UDP-glucose 6-dehydrogenase (UDP-Glc dehydrogenase) (UDP-GlcDH) (UDPGDH) (EC 1.1.1.22)	0.488858	1.2E+07|1.2E+07|1.1E+07	3.51077e+07	1.17026e+07	3	1.6E+07|1.9E+07|2.2E+07	5.66749e+07	1.88916e+07	3	0.0101	0.619458	0.4972	MQ	q	I
555	4104_ML_FinalNorm	AR-22Y-0060DHT	O60701	UGDH	UDP-glucose 6-dehydrogenase (UDP-Glc dehydrogenase) (UDP-GlcDH) (UDPGDH) (EC 1.1.1.22)	0.488858	6.3E+06|9.7E+06|1.3E+07	2.91476e+07	9.71585e+06	3	1.6E+07|1.9E+07|2.2E+07	5.66749e+07	1.88916e+07	3	0.0071	0.514294	0.5248	MQ	q	I
556	4104_ML_FinalNorm	AR-WT-0000DHT	O60701	UGDH	UDP-glucose 6-dehydrogenase (UDP-Glc dehydrogenase) (UDP-GlcDH) (UDPGDH) (EC 1.1.1.22)	0.488858	2.8E+06|2.7E+06|NAN	5.55948e+06	2.77974e+06	3	1.6E+07|1.9E+07|2.2E+07	5.66749e+07	1.88916e+07	3	0.0001	0.147141	0.6286	MQ	q	I
557	4104_ML_FinalNorm	AR-WT-0060DHT	O60701	UGDH	UDP-glucose 6-dehydrogenase (UDP-Glc dehydrogenase) (UDP-GlcDH) (UDPGDH) (EC 1.1.1.22)	0.488858	4.1E+06|4.4E+06|3.0E+06	1.14791e+07	3.82638e+06	3	1.6E+07|1.9E+07|2.2E+07	5.66749e+07	1.88916e+07	3	0.0003	0.202544	0.6208	MQ	q	I
558	4104_ML_FinalNorm	AR-22Y-0000DHT	O60711	LPXN	Leupaxin	0	1.0E+07|1.0E+07|1.4E+07	3.4624e+07	1.15413e+07	3	4.0E+06|5.2E+06|4.8E+06	1.40525e+07	4.68417e+06	3	1	2.4639	0	MQ	q	I
559	4104_ML_FinalNorm	AR-22Y-0060DHT	O60711	LPXN	Leupaxin	0	1.1E+07|1.2E+07|1.0E+07	3.26833e+07	1.08944e+07	3	4.0E+06|5.2E+06|4.8E+06	1.40525e+07	4.68417e+06	3	1	2.3258	0	MQ	q	I
560	4104_ML_FinalNorm	AR-WT-0000DHT	O60711	LPXN	Leupaxin	0	1.3E+06|3.7E+06|3.4E+06	8.27313e+06	2.75771e+06	3	4.0E+06|5.2E+06|4.8E+06	1.40525e+07	4.68417e+06	3	0.0119	0.588731	0.4836	MQ	q	I
561	4104_ML_FinalNorm	AR-22Y-0000DHT	O60716	CTNND1	Catenin delta-1 (Cadherin-associated Src substrate) (CAS) (p120 catenin) (p120(ctn)) (p120(cas))	0.837089	NAN|NAN|4.5E+06	4.45677e+06	4.45677e+06	3	1.6E+07|1.1E+07|8.7E+06	3.54932e+07	1.18311e+07	3	0.0018	0.3767	0.5908	MQ	q	I
562	4104_ML_FinalNorm	AR-22Y-0060DHT	O60716	CTNND1	Catenin delta-1 (Cadherin-associated Src substrate) (CAS) (p120 catenin) (p120(ctn)) (p120(cas))	0.837089	7.0E+06|1.5E+07|1.3E+07	3.48015e+07	1.16005e+07	3	1.6E+07|1.1E+07|8.7E+06	3.54932e+07	1.18311e+07	3	0.063	0.98051	0.3012	MQ	q	I
563	4104_ML_FinalNorm	AR-WT-0000DHT	O60716	CTNND1	Catenin delta-1 (Cadherin-associated Src substrate) (CAS) (p120 catenin) (p120(ctn)) (p120(cas))	0.837089	7.8E+06|7.8E+06|5.7E+06	2.13747e+07	7.12489e+06	3	1.6E+07|1.1E+07|8.7E+06	3.54932e+07	1.18311e+07	3	0.0195	0.602218	0.4311	MQ	q	I
564	4104_ML_FinalNorm	AR-WT-0060DHT	O60716	CTNND1	Catenin delta-1 (Cadherin-associated Src substrate) (CAS) (p120 catenin) (p120(ctn)) (p120(cas))	0.837089	1.7E+06|6.4E+06|4.3E+06	1.24565e+07	4.15218e+06	3	1.6E+07|1.1E+07|8.7E+06	3.54932e+07	1.18311e+07	3	0.0067	0.350955	0.5282	MQ	q	I
565	4104_ML_FinalNorm	AR-WT-0000DHT	O60762	DPM1	Dolichol-phosphate mannosyltransferase subunit 1 (EC 2.4.1.83) (Dolichol-phosphate mannose synthase subunit 1) (DPM synthase subunit 1) (Dolichyl-phosphate beta-D-mannosyltransferase subunit 1) (Mannose-P-dolichol synthase subunit 1) (MPD synthase subunit 1)	0.777533	NAN|3.7E+05|NAN	368311	368311	3	3.5E+06|1.1E+06|2.7E+06	7.26326e+06	2.42109e+06	3	0.0002	0.152126	0.6234	MQ	q	I
566	4104_ML_FinalNorm	AR-22Y-0000DHT	O60763	USO1	General vesicular transport factor p115 (Protein USO1 homolog) (Transcytosis-associated protein) (TAP) (Vesicle-docking protein)	0.877543	NAN|1.4E+06|1.1E+06	2.47339e+06	1.23669e+06	3	2.3E+07|3.0E+07|2.7E+07	7.97029e+07	2.65676e+07	3	0	0.0465489	0.6339	MQ	q	I
567	4104_ML_FinalNorm	AR-WT-0000DHT	O60763	USO1	General vesicular transport factor p115 (Protein USO1 homolog) (Transcytosis-associated protein) (TAP) (Vesicle-docking protein)	0.877543	3.5E+06|5.6E+06|6.9E+06	1.60091e+07	5.33638e+06	3	2.3E+07|3.0E+07|2.7E+07	7.97029e+07	2.65676e+07	3	0.0004	0.20086	0.6178	MQ	q	I
568	4104_ML_FinalNorm	AR-WT-0060DHT	O60763	USO1	General vesicular transport factor p115 (Protein USO1 homolog) (Transcytosis-associated protein) (TAP) (Vesicle-docking protein)	0.877543	2.8E+06|9.5E+05|2.9E+06	6.62532e+06	2.20844e+06	3	2.3E+07|3.0E+07|2.7E+07	7.97029e+07	2.65676e+07	3	0	0.0831252	0.6339	MQ	q	I
569	4104_ML_FinalNorm	AR-WT-0000DHT	O60783	MRPS14	28S ribosomal protein S14, mitochondrial (MRP-S14) (S14mt) (Mitochondrial small ribosomal subunit protein uS14m)	0.666815	3.0E+06|2.6E+06|1.3E+06	6.82736e+06	2.27579e+06	3	1.2E+05|8.8E+05|1.1E+06	2.0471e+06	682366	3	0.616	3.33514	0.0727	MQ	q	I
570	4104_ML_FinalNorm	AR-WT-0060DHT	O60783	MRPS14	28S ribosomal protein S14, mitochondrial (MRP-S14) (S14mt) (Mitochondrial small ribosomal subunit protein uS14m)	0.666815	2.4E+06|5.7E+05|1.0E+06	4.00702e+06	1.33567e+06	3	1.2E+05|8.8E+05|1.1E+06	2.0471e+06	682366	3	0.4251	1.95741	0.1101	MQ	q	I
571	4104_ML_FinalNorm	AR-22Y-0000DHT	O60832	DKC1	H/ACA ribonucleoprotein complex subunit DKC1 (EC 5.4.99.-) (CBF5 homolog) (Dyskerin) (Nopp140-associated protein of 57 kDa) (Nucleolar protein NAP57) (Nucleolar protein family A member 4) (snoRNP protein DKC1)	0.905555	1.2E+07|1.5E+07|1.4E+07	4.11422e+07	1.37141e+07	3	6.4E+06|4.4E+06|6.9E+06	1.77533e+07	5.91776e+06	3	0.9351	2.31744	0.004	MQ	q	I
572	4104_ML_FinalNorm	AR-22Y-0060DHT	O60832	DKC1	H/ACA ribonucleoprotein complex subunit DKC1 (EC 5.4.99.-) (CBF5 homolog) (Dyskerin) (Nopp140-associated protein of 57 kDa) (Nucleolar protein NAP57) (Nucleolar protein family A member 4) (snoRNP protein DKC1)	0.905555	3.9E+06|3.9E+06|1.4E+06	9.27971e+06	3.09324e+06	3	6.4E+06|4.4E+06|6.9E+06	1.77533e+07	5.91776e+06	3	0.0347	0.522704	0.3554	MQ	q	I
573	4104_ML_FinalNorm	AR-WT-0000DHT	O60832	DKC1	H/ACA ribonucleoprotein complex subunit DKC1 (EC 5.4.99.-) (CBF5 homolog) (Dyskerin) (Nopp140-associated protein of 57 kDa) (Nucleolar protein NAP57) (Nucleolar protein family A member 4) (snoRNP protein DKC1)	0.905555	3.0E+05|NAN|2.7E+05	569834	284917	3	6.4E+06|4.4E+06|6.9E+06	1.77533e+07	5.91776e+06	3	0.0026	0.0481461	0.5771	MQ	q	I
574	4104_ML_FinalNorm	AR-22Y-0000DHT	O60841	EIF5B	Eukaryotic translation initiation factor 5B (eIF-5B) (EC 3.6.5.3) (Translation initiation factor IF-2)	0.916346	2.3E+06|NAN|2.4E+06	4.73195e+06	2.36598e+06	3	2.6E+07|2.7E+07|2.4E+07	7.69971e+07	2.56657e+07	3	0	0.0921844	0.6339	MQ	q	I
575	4104_ML_FinalNorm	AR-22Y-0060DHT	O60841	EIF5B	Eukaryotic translation initiation factor 5B (eIF-5B) (EC 3.6.5.3) (Translation initiation factor IF-2)	0.916346	NAN|2.9E+06|1.1E+07	1.40101e+07	7.00504e+06	3	2.6E+07|2.7E+07|2.4E+07	7.69971e+07	2.56657e+07	3	0.0013	0.272934	0.5984	MQ	q	I
576	4104_ML_FinalNorm	AR-WT-0000DHT	O60841	EIF5B	Eukaryotic translation initiation factor 5B (eIF-5B) (EC 3.6.5.3) (Translation initiation factor IF-2)	0.916346	4.3E+06|9.9E+06|8.6E+06	2.27584e+07	7.58614e+06	3	2.6E+07|2.7E+07|2.4E+07	7.69971e+07	2.56657e+07	3	0.0015	0.295575	0.5948	MQ	q	I
577	4104_ML_FinalNorm	AR-WT-0060DHT	O60841	EIF5B	Eukaryotic translation initiation factor 5B (eIF-5B) (EC 3.6.5.3) (Translation initiation factor IF-2)	0.916346	5.0E+06|6.2E+06|3.5E+06	1.47336e+07	4.9112e+06	3	2.6E+07|2.7E+07|2.4E+07	7.69971e+07	2.56657e+07	3	0.0003	0.191353	0.6208	MQ	q	I
578	4104_ML_FinalNorm	AR-22Y-0000DHT	O60884	DNAJA2	DnaJ homolog subfamily A member 2 (Cell cycle progression restoration gene 3 protein) (Dnj3) (Dj3) (HIRA-interacting protein 4) (Renal carcinoma antigen NY-REN-14)	0.913705	4.2E+06|6.6E+06|6.3E+06	1.70868e+07	5.69559e+06	3	4.8E+06|5.4E+06|1.2E+07	2.25884e+07	7.52947e+06	3	0.0595	0.75644	0.3065	MQ	q	I
579	4104_ML_FinalNorm	AR-22Y-0060DHT	O60884	DNAJA2	DnaJ homolog subfamily A member 2 (Cell cycle progression restoration gene 3 protein) (Dnj3) (Dj3) (HIRA-interacting protein 4) (Renal carcinoma antigen NY-REN-14)	0.913705	2.9E+06|NAN|9.0E+06	1.19396e+07	5.9698e+06	3	4.8E+06|5.4E+06|1.2E+07	2.25884e+07	7.52947e+06	3	0.0504	0.792859	0.3205	MQ	q	I
580	4104_ML_FinalNorm	AR-WT-0000DHT	O60884	DNAJA2	DnaJ homolog subfamily A member 2 (Cell cycle progression restoration gene 3 protein) (Dnj3) (Dj3) (HIRA-interacting protein 4) (Renal carcinoma antigen NY-REN-14)	0.913705	4.2E+06|3.3E+06|1.5E+06	9.055e+06	3.01833e+06	3	4.8E+06|5.4E+06|1.2E+07	2.25884e+07	7.52947e+06	3	0.0164	0.400869	0.4498	MQ	q	I
581	4104_ML_FinalNorm	AR-WT-0060DHT	O60884	DNAJA2	DnaJ homolog subfamily A member 2 (Cell cycle progression restoration gene 3 protein) (Dnj3) (Dj3) (HIRA-interacting protein 4) (Renal carcinoma antigen NY-REN-14)	0.913705	3.7E+06|3.6E+06|4.0E+06	1.13733e+07	3.79111e+06	3	4.8E+06|5.4E+06|1.2E+07	2.25884e+07	7.52947e+06	3	0.0239	0.503503	0.4042	MQ	q	I
582	4104_ML_FinalNorm	AR-WT-0000DHT	O60885	BRD4	Bromodomain-containing protein 4 (Protein HUNK1)	0.865507	3.4E+06|2.6E+06|3.8E+06	9.77641e+06	3.2588e+06	3	5.1E+06|5.0E+06|5.8E+06	1.58701e+07	5.29004e+06	3	0.0137	0.616026	0.4701	MQ	q	I
583	4104_ML_FinalNorm	AR-WT-0060DHT	O60885	BRD4	Bromodomain-containing protein 4 (Protein HUNK1)	0.865507	1.4E+07|1.7E+07|1.8E+07	4.82481e+07	1.60827e+07	3	5.1E+06|5.0E+06|5.8E+06	1.58701e+07	5.29004e+06	3	1	3.04019	0	MQ	q	I
584	4104_ML_FinalNorm	AR-22Y-0000DHT	O60925	PFDN1	Prefoldin subunit 1	0.777533	NAN|2.2E+06|NAN	2.24397e+06	2.24397e+06	3	3.0E+06|4.3E+06|3.6E+06	1.08942e+07	3.63141e+06	3	0.0058	0.617933	0.5372	MQ	q	I
585	4104_ML_FinalNorm	AR-22Y-0060DHT	O60925	PFDN1	Prefoldin subunit 1	0.777533	NAN|1.8E+06|NAN	1.76655e+06	1.76655e+06	3	3.0E+06|4.3E+06|3.6E+06	1.08942e+07	3.63141e+06	3	0.0037	0.486463	0.5614	MQ	q	I
586	4104_ML_FinalNorm	AR-WT-0000DHT	O60925	PFDN1	Prefoldin subunit 1	0.777533	1.5E+07|1.8E+07|1.7E+07	5.03968e+07	1.67989e+07	3	3.0E+06|4.3E+06|3.6E+06	1.08942e+07	3.63141e+06	3	1	4.626	0	MQ	q	I
587	4104_ML_FinalNorm	AR-WT-0060DHT	O60925	PFDN1	Prefoldin subunit 1	0.777533	8.3E+06|1.0E+07|9.4E+06	2.82338e+07	9.41126e+06	3	3.0E+06|4.3E+06|3.6E+06	1.08942e+07	3.63141e+06	3	0.9999	2.59162	0	MQ	q	I
588	4104_ML_FinalNorm	AR-22Y-0000DHT	O75027	ABCB7	Iron-sulfur clusters transporter ABCB7, mitochondrial (ATP-binding cassette sub-family B member 7, mitochondrial) (ATP-binding cassette transporter 7) (ABC transporter 7 protein)	0.557955	NAN|2.2E+06|4.9E+06	7.05283e+06	3.52642e+06	3	2.2E+06|3.7E+06|4.1E+06	9.98867e+06	3.32956e+06	3	0.076	1.05912	0.2866	MQ	q	I
589	4104_ML_FinalNorm	AR-22Y-0060DHT	O75027	ABCB7	Iron-sulfur clusters transporter ABCB7, mitochondrial (ATP-binding cassette sub-family B member 7, mitochondrial) (ATP-binding cassette transporter 7) (ABC transporter 7 protein)	0.557955	2.0E+06|4.8E+06|5.8E+06	1.25807e+07	4.19358e+06	3	2.2E+06|3.7E+06|4.1E+06	9.98867e+06	3.32956e+06	3	0.2019	1.2595	0.2172	MQ	q	I
590	4104_ML_FinalNorm	AR-WT-0000DHT	O75027	ABCB7	Iron-sulfur clusters transporter ABCB7, mitochondrial (ATP-binding cassette sub-family B member 7, mitochondrial) (ATP-binding cassette transporter 7) (ABC transporter 7 protein)	0.557955	8.9E+05|8.0E+05|7.3E+05	2.42449e+06	808164	3	2.2E+06|3.7E+06|4.1E+06	9.98867e+06	3.32956e+06	3	0.0022	0.242724	0.5847	MQ	q	I
591	4104_ML_FinalNorm	AR-WT-0060DHT	O75027	ABCB7	Iron-sulfur clusters transporter ABCB7, mitochondrial (ATP-binding cassette sub-family B member 7, mitochondrial) (ATP-binding cassette transporter 7) (ABC transporter 7 protein)	0.557955	8.3E+05|1.0E+06|9.9E+05	2.85821e+06	952736	3	2.2E+06|3.7E+06|4.1E+06	9.98867e+06	3.32956e+06	3	0.0038	0.286145	0.5602	MQ	q	I
592	4104_ML_FinalNorm	AR-WT-0000DHT	O75113	N4BP1	NEDD4-binding protein 1 (N4BP1) (EC 3.1.-.-)	0.551821	7.7E+06|2.7E+06|4.1E+06	1.44818e+07	4.82726e+06	3	1.0E+06|1.1E+06|2.7E+05	2.32343e+06	774477	3	0.8642	6.23294	0.0081	MQ	q	I
593	4104_ML_FinalNorm	AR-WT-0060DHT	O75113	N4BP1	NEDD4-binding protein 1 (N4BP1) (EC 3.1.-.-)	0.551821	1.7E+06|1.8E+06|1.8E+06	5.26532e+06	1.75511e+06	3	1.0E+06|1.1E+06|2.7E+05	2.32343e+06	774477	3	0.4837	2.26618	0.1001	MQ	q	I
594	4104_ML_FinalNorm	AR-22Y-0000DHT	O75116	ROCK2	Rho-associated protein kinase 2 (EC 2.7.11.1) (Rho kinase 2) (Rho-associated, coiled-coil-containing protein kinase 2) (Rho-associated, coiled-coil-containing protein kinase II) (ROCK-II) (p164 ROCK-2)	0.621794	7.8E+06|6.0E+06|6.8E+06	2.0696e+07	6.89865e+06	3	9.9E+06|1.4E+07|1.1E+07	3.485e+07	1.16167e+07	3	0.0116	0.593858	0.4868	MQ	q	I
595	4104_ML_FinalNorm	AR-22Y-0060DHT	O75116	ROCK2	Rho-associated protein kinase 2 (EC 2.7.11.1) (Rho kinase 2) (Rho-associated, coiled-coil-containing protein kinase 2) (Rho-associated, coiled-coil-containing protein kinase II) (ROCK-II) (p164 ROCK-2)	0.621794	3.1E+06|5.4E+06|2.5E+06	1.08659e+07	3.62196e+06	3	9.9E+06|1.4E+07|1.1E+07	3.485e+07	1.16167e+07	3	0.0024	0.31179	0.5812	MQ	q	I
596	4104_ML_FinalNorm	AR-WT-0000DHT	O75116	ROCK2	Rho-associated protein kinase 2 (EC 2.7.11.1) (Rho kinase 2) (Rho-associated, coiled-coil-containing protein kinase 2) (Rho-associated, coiled-coil-containing protein kinase II) (ROCK-II) (p164 ROCK-2)	0.621794	8.4E+06|1.1E+07|1.5E+07	3.4349e+07	1.14497e+07	3	9.9E+06|1.4E+07|1.1E+07	3.485e+07	1.16167e+07	3	0.0504	0.985623	0.3205	MQ	q	I
597	4104_ML_FinalNorm	AR-WT-0060DHT	O75116	ROCK2	Rho-associated protein kinase 2 (EC 2.7.11.1) (Rho kinase 2) (Rho-associated, coiled-coil-containing protein kinase 2) (Rho-associated, coiled-coil-containing protein kinase II) (ROCK-II) (p164 ROCK-2)	0.621794	4.5E+06|2.0E+06|3.3E+06	9.87602e+06	3.29201e+06	3	9.9E+06|1.4E+07|1.1E+07	3.485e+07	1.16167e+07	3	0.0017	0.283386	0.5923	MQ	q	I
598	4104_ML_FinalNorm	AR-WT-0000DHT	O75122	CLASP2	CLIP-associating protein 2 (Cytoplasmic linker-associated protein 2) (Protein Orbit homolog 2) (hOrbit2)	0.871277	7.5E+06|5.4E+06|8.5E+06	2.13771e+07	7.1257e+06	3	5.4E+06|6.2E+06|8.1E+06	1.97319e+07	6.57729e+06	3	0.0651	1.08338	0.2975	MQ	q	I
599	4104_ML_FinalNorm	AR-WT-0060DHT	O75122	CLASP2	CLIP-associating protein 2 (Cytoplasmic linker-associated protein 2) (Protein Orbit homolog 2) (hOrbit2)	0.871277	6.9E+06|4.0E+06|3.3E+06	1.42321e+07	4.74405e+06	3	5.4E+06|6.2E+06|8.1E+06	1.97319e+07	6.57729e+06	3	0.0205	0.721277	0.4238	MQ	q	I
600	4104_ML_FinalNorm	AR-WT-0000DHT	O75152	ZC3H11A	Zinc finger CCCH domain-containing protein 11A	0.886787	2.8E+05|3.7E+05|2.9E+05	935572	311857	3	5.0E+06|5.4E+06|7.1E+06	1.75777e+07	5.85922e+06	3	0	0.0532251	0.6339	MQ	q	I
601	4104_ML_FinalNorm	AR-WT-0060DHT	O75152	ZC3H11A	Zinc finger CCCH domain-containing protein 11A	0.886787	NAN|3.9E+05|NAN	394020	394020	3	5.0E+06|5.4E+06|7.1E+06	1.75777e+07	5.85922e+06	3	0	0.0672478	0.6339	MQ	q	I
602	4104_ML_FinalNorm	AR-WT-0000DHT	O75165	DNAJC13	DnaJ homolog subfamily C member 13 (Required for receptor-mediated endocytosis 8) (RME-8)	0.680419	5.7E+06|2.5E+06|4.7E+06	1.29064e+07	4.30213e+06	3	2.1E+07|1.6E+07|1.5E+07	5.11667e+07	1.70556e+07	3	0.0011	0.252242	0.6013	MQ	q	I
603	4104_ML_FinalNorm	AR-WT-0060DHT	O75165	DNAJC13	DnaJ homolog subfamily C member 13 (Required for receptor-mediated endocytosis 8) (RME-8)	0.680419	3.8E+06|2.6E+06|1.6E+06	7.97753e+06	2.65918e+06	3	2.1E+07|1.6E+07|1.5E+07	5.11667e+07	1.70556e+07	3	0.0002	0.155912	0.6234	MQ	q	I
604	4104_ML_FinalNorm	AR-WT-0000DHT	O75170	PPP6R2	Serine/threonine-protein phosphatase 6 regulatory subunit 2 (SAPS domain family member 2)	0.451197	1.1E+06|1.4E+06|1.0E+06	3.4734e+06	1.1578e+06	3	6.7E+03|8.9E+03|1.1E+04	26382.4	8794.13	3	1	131.656	0	MQ	q	I
605	4104_ML_FinalNorm	AR-WT-0060DHT	O75170	PPP6R2	Serine/threonine-protein phosphatase 6 regulatory subunit 2 (SAPS domain family member 2)	0.451197	1.4E+06|1.3E+06|2.9E+06	5.49956e+06	1.83319e+06	3	6.7E+03|8.9E+03|1.1E+04	26382.4	8794.13	3	1	208.456	0	MQ	q	I
606	4104_ML_FinalNorm	AR-22Y-0000DHT	O75175	CNOT3	CCR4-NOT transcription complex subunit 3 (CCR4-associated factor 3) (Leukocyte receptor cluster member 2)	0.674107	NAN|2.6E+06|NAN	2.6358e+06	2.6358e+06	3	NAN|2.4E+05|3.7E+05	610289	305144	3	0.3333	8.63789	0.1476	MQ	q	I
607	4104_ML_FinalNorm	AR-22Y-0060DHT	O75175	CNOT3	CCR4-NOT transcription complex subunit 3 (CCR4-associated factor 3) (Leukocyte receptor cluster member 2)	0.674107	NAN|NAN|1.6E+06	1.61242e+06	1.61242e+06	3	NAN|2.4E+05|3.7E+05	610289	305144	3	0.3333	5.28413	0.1476	MQ	q	I
608	4104_ML_FinalNorm	AR-WT-0000DHT	O75175	CNOT3	CCR4-NOT transcription complex subunit 3 (CCR4-associated factor 3) (Leukocyte receptor cluster member 2)	0.674107	1.6E+06|1.8E+06|1.4E+06	4.803e+06	1.601e+06	3	NAN|2.4E+05|3.7E+05	610289	305144	3	1	5.2467	0	MQ	q	I
609	4104_ML_FinalNorm	AR-WT-0060DHT	O75175	CNOT3	CCR4-NOT transcription complex subunit 3 (CCR4-associated factor 3) (Leukocyte receptor cluster member 2)	0.674107	1.6E+06|NAN|NAN	1.64919e+06	1.64919e+06	3	NAN|2.4E+05|3.7E+05	610289	305144	3	0.3333	5.40461	0.1476	MQ	q	I
610	4104_ML_FinalNorm	AR-22Y-0000DHT	O75179	ANKRD17	Ankyrin repeat domain-containing protein 17 (Gene trap ankyrin repeat protein) (Serologically defined breast cancer antigen NY-BR-16)	0.873466	1.1E+08|1.3E+08|1.6E+08	4.05398e+08	1.35133e+08	3	3.4E+07|2.9E+07|3.3E+07	9.55643e+07	3.18548e+07	3	1	4.24214	0	MQ	q	I
611	4104_ML_FinalNorm	AR-22Y-0060DHT	O75179	ANKRD17	Ankyrin repeat domain-containing protein 17 (Gene trap ankyrin repeat protein) (Serologically defined breast cancer antigen NY-BR-16)	0.873466	2.3E+08|2.0E+08|2.6E+08	6.96194e+08	2.32065e+08	3	3.4E+07|2.9E+07|3.3E+07	9.55643e+07	3.18548e+07	3	1	7.28508	0	MQ	q	I
612	4104_ML_FinalNorm	AR-WT-0000DHT	O75179	ANKRD17	Ankyrin repeat domain-containing protein 17 (Gene trap ankyrin repeat protein) (Serologically defined breast cancer antigen NY-BR-16)	0.873466	6.4E+07|5.7E+07|6.2E+07	1.83455e+08	6.11518e+07	3	3.4E+07|2.9E+07|3.3E+07	9.55643e+07	3.18548e+07	3	0.995	1.9197	0.0002	MQ	q	I
613	4104_ML_FinalNorm	AR-WT-0060DHT	O75179	ANKRD17	Ankyrin repeat domain-containing protein 17 (Gene trap ankyrin repeat protein) (Serologically defined breast cancer antigen NY-BR-16)	0.873466	5.0E+07|4.7E+07|4.9E+07	1.46321e+08	4.87738e+07	3	3.4E+07|2.9E+07|3.3E+07	9.55643e+07	3.18548e+07	3	0.6909	1.53113	0.0309	MQ	q	I
614	4104_ML_FinalNorm	AR-22Y-0000DHT	O75190	DNAJB6	DnaJ homolog subfamily B member 6 (HHDJ1) (Heat shock protein J2) (HSJ-2) (MRJ) (MSJ-1)	0.7473	6.2E+06|9.5E+06|1.6E+07	3.16303e+07	1.05434e+07	3	2.3E+06|3.0E+06|6.5E+06	1.17707e+07	3.92356e+06	3	0.567	2.68722	0.0813	MQ	q	I
615	4104_ML_FinalNorm	AR-22Y-0060DHT	O75190	DNAJB6	DnaJ homolog subfamily B member 6 (HHDJ1) (Heat shock protein J2) (HSJ-2) (MRJ) (MSJ-1)	0.7473	5.3E+07|6.1E+07|5.9E+07	1.7295e+08	5.76501e+07	3	2.3E+06|3.0E+06|6.5E+06	1.17707e+07	3.92356e+06	3	1	14.6933	0	MQ	q	I
616	4104_ML_FinalNorm	AR-WT-0000DHT	O75190	DNAJB6	DnaJ homolog subfamily B member 6 (HHDJ1) (Heat shock protein J2) (HSJ-2) (MRJ) (MSJ-1)	0.7473	2.8E+06|3.1E+06|8.2E+06	1.40984e+07	4.69946e+06	3	2.3E+06|3.0E+06|6.5E+06	1.17707e+07	3.92356e+06	3	0.2001	1.19775	0.2184	MQ	q	I
617	4104_ML_FinalNorm	AR-WT-0060DHT	O75190	DNAJB6	DnaJ homolog subfamily B member 6 (HHDJ1) (Heat shock protein J2) (HSJ-2) (MRJ) (MSJ-1)	0.7473	3.6E+06|3.5E+06|9.5E+06	1.66584e+07	5.55279e+06	3	2.3E+06|3.0E+06|6.5E+06	1.17707e+07	3.92356e+06	3	0.2535	1.41524	0.199	MQ	q	I
618	4104_ML_FinalNorm	AR-22Y-0000DHT	O75223	GGCT	Gamma-glutamylcyclotransferase (EC 4.3.2.9) (Cytochrome c-releasing factor 21)	0.794321	9.6E+06|5.3E+06|4.0E+06	1.8874e+07	6.29133e+06	3	6.6E+03|1.2E+04|1.0E+04	29005.8	9668.61	3	1	650.697	0	MQ	q	I
619	4104_ML_FinalNorm	AR-22Y-0060DHT	O75223	GGCT	Gamma-glutamylcyclotransferase (EC 4.3.2.9) (Cytochrome c-releasing factor 21)	0.794321	5.7E+06|6.5E+06|5.3E+06	1.75855e+07	5.86183e+06	3	6.6E+03|1.2E+04|1.0E+04	29005.8	9668.61	3	1	606.275	0	MQ	q	I
620	4104_ML_FinalNorm	AR-22Y-0000DHT	O75306	NDUFS2	NADH dehydrogenase [ubiquinone] iron-sulfur protein 2, mitochondrial (EC 7.1.1.2) (Complex I-49kD) (CI-49kD) (NADH-ubiquinone oxidoreductase 49 kDa subunit)	0.680984	NAN|NAN|1.3E+06	1.29124e+06	1.29124e+06	3	4.0E+05|6.2E+05|6.9E+05	1.70482e+06	568273	3	0.3069	2.27221	0.1817	MQ	q	I
621	4104_ML_FinalNorm	AR-WT-0000DHT	O75306	NDUFS2	NADH dehydrogenase [ubiquinone] iron-sulfur protein 2, mitochondrial (EC 7.1.1.2) (Complex I-49kD) (CI-49kD) (NADH-ubiquinone oxidoreductase 49 kDa subunit)	0.680984	1.6E+06|1.5E+06|1.5E+06	4.68868e+06	1.56289e+06	3	4.0E+05|6.2E+05|6.9E+05	1.70482e+06	568273	3	0.9907	2.75025	0.0004	MQ	q	I
622	4104_ML_FinalNorm	AR-WT-0060DHT	O75306	NDUFS2	NADH dehydrogenase [ubiquinone] iron-sulfur protein 2, mitochondrial (EC 7.1.1.2) (Complex I-49kD) (CI-49kD) (NADH-ubiquinone oxidoreductase 49 kDa subunit)	0.680984	1.4E+06|7.2E+05|9.1E+05	2.99293e+06	997643	3	4.0E+05|6.2E+05|6.9E+05	1.70482e+06	568273	3	0.46	1.75557	0.1037	MQ	q	I
623	4104_ML_FinalNorm	AR-22Y-0000DHT	O75340	PDCD6	Programmed cell death protein 6 (Apoptosis-linked gene 2 protein homolog) (ALG-2)	0.812258	3.4E+06|3.4E+07|1.7E+07	5.42438e+07	1.80813e+07	3	8.6E+06|7.9E+06|7.9E+06	2.43529e+07	8.11763e+06	3	0.6707	2.22741	0.0385	MQ	q	I
624	4104_ML_FinalNorm	AR-22Y-0060DHT	O75340	PDCD6	Programmed cell death protein 6 (Apoptosis-linked gene 2 protein homolog) (ALG-2)	0.812258	1.2E+07|4.0E+06|4.3E+06	2.05174e+07	6.83913e+06	3	8.6E+06|7.9E+06|7.9E+06	2.43529e+07	8.11763e+06	3	0.217	0.842503	0.2119	MQ	q	I
625	4104_ML_FinalNorm	AR-WT-0000DHT	O75340	PDCD6	Programmed cell death protein 6 (Apoptosis-linked gene 2 protein homolog) (ALG-2)	0.812258	1.2E+06|1.9E+06|1.3E+06	4.38619e+06	1.46206e+06	3	8.6E+06|7.9E+06|7.9E+06	2.43529e+07	8.11763e+06	3	0.0028	0.18011	0.5734	MQ	q	I
626	4104_ML_FinalNorm	AR-WT-0060DHT	O75340	PDCD6	Programmed cell death protein 6 (Apoptosis-linked gene 2 protein homolog) (ALG-2)	0.812258	1.5E+06|3.8E+06|2.8E+06	8.04432e+06	2.68144e+06	3	8.6E+06|7.9E+06|7.9E+06	2.43529e+07	8.11763e+06	3	0.0086	0.330323	0.509	MQ	q	I
627	4104_ML_FinalNorm	AR-WT-0000DHT	O75362	ZNF217	Zinc finger protein 217	0.512664	4.5E+06|4.1E+06|5.1E+06	1.37079e+07	4.56929e+06	3	1.1E+06|7.4E+05|5.0E+05	2.36349e+06	787830	3	0.9997	5.79984	0	MQ	q	I
628	4104_ML_FinalNorm	AR-WT-0060DHT	O75362	ZNF217	Zinc finger protein 217	0.512664	2.3E+07|2.1E+07|2.2E+07	6.63005e+07	2.21002e+07	3	1.1E+06|7.4E+05|5.0E+05	2.36349e+06	787830	3	1	28.052	0	MQ	q	I
629	4104_ML_FinalNorm	AR-22Y-0000DHT	O75367	MACROH2A1	Core histone macro-H2A.1 (Histone macroH2A1) (mH2A1) (Histone H2A.y) (H2A/y) (Medulloblastoma antigen MU-MB-50.205)	0.918472	7.3E+06|1.0E+07|7.8E+06	2.5352e+07	8.45066e+06	3	1.4E+07|1.3E+07|1.4E+07	4.14822e+07	1.38274e+07	3	0.022	0.611153	0.4153	MQ	q	I
630	4104_ML_FinalNorm	AR-22Y-0060DHT	O75367	MACROH2A1	Core histone macro-H2A.1 (Histone macroH2A1) (mH2A1) (Histone H2A.y) (H2A/y) (Medulloblastoma antigen MU-MB-50.205)	0.918472	4.1E+06|NAN|3.2E+06	7.26106e+06	3.63053e+06	3	1.4E+07|1.3E+07|1.4E+07	4.14822e+07	1.38274e+07	3	0.0047	0.262561	0.5497	MQ	q	I
631	4104_ML_FinalNorm	AR-WT-0000DHT	O75367	MACROH2A1	Core histone macro-H2A.1 (Histone macroH2A1) (mH2A1) (Histone H2A.y) (H2A/y) (Medulloblastoma antigen MU-MB-50.205)	0.918472	NAN|5.2E+05|7.9E+05	1.30414e+06	652068	3	1.4E+07|1.3E+07|1.4E+07	4.14822e+07	1.38274e+07	3	0.0001	0.0471577	0.6286	MQ	q	I
632	4104_ML_FinalNorm	AR-22Y-0000DHT	O75369	FLNB	Filamin-B (FLN-B) (ABP-278) (ABP-280 homolog) (Actin-binding-like protein) (Beta-filamin) (Filamin homolog 1) (Fh1) (Filamin-3) (Thyroid autoantigen) (Truncated actin-binding protein) (Truncated ABP)	0.979638	2.6E+07|4.5E+07|7.0E+07	1.39898e+08	4.66326e+07	3	6.5E+08|6.2E+08|6.2E+08	1.89975e+09	6.33249e+08	3	0	0.0736403	0.6339	MQ	q	I
633	4104_ML_FinalNorm	AR-22Y-0060DHT	O75369	FLNB	Filamin-B (FLN-B) (ABP-278) (ABP-280 homolog) (Actin-binding-like protein) (Beta-filamin) (Filamin homolog 1) (Fh1) (Filamin-3) (Thyroid autoantigen) (Truncated actin-binding protein) (Truncated ABP)	0.979638	6.4E+07|6.9E+07|6.3E+07	1.96075e+08	6.53583e+07	3	6.5E+08|6.2E+08|6.2E+08	1.89975e+09	6.33249e+08	3	0	0.103211	0.6339	MQ	q	I
634	4104_ML_FinalNorm	AR-WT-0000DHT	O75369	FLNB	Filamin-B (FLN-B) (ABP-278) (ABP-280 homolog) (Actin-binding-like protein) (Beta-filamin) (Filamin homolog 1) (Fh1) (Filamin-3) (Thyroid autoantigen) (Truncated actin-binding protein) (Truncated ABP)	0.979638	2.2E+08|2.3E+08|2.2E+08	6.70113e+08	2.23371e+08	3	6.5E+08|6.2E+08|6.2E+08	1.89975e+09	6.33249e+08	3	0.002	0.352738	0.5878	MQ	q	I
635	4104_ML_FinalNorm	AR-WT-0060DHT	O75369	FLNB	Filamin-B (FLN-B) (ABP-278) (ABP-280 homolog) (Actin-binding-like protein) (Beta-filamin) (Filamin homolog 1) (Fh1) (Filamin-3) (Thyroid autoantigen) (Truncated actin-binding protein) (Truncated ABP)	0.979638	1.3E+08|1.4E+08|1.3E+08	4.00012e+08	1.33337e+08	3	6.5E+08|6.2E+08|6.2E+08	1.89975e+09	6.33249e+08	3	0.0003	0.210561	0.6208	MQ	q	I
636	4104_ML_FinalNorm	AR-22Y-0000DHT	O75376	NCOR1	Nuclear receptor corepressor 1 (N-CoR) (N-CoR1)	0.799323	2.6E+07|4.2E+07|1.1E+08	1.78825e+08	5.96083e+07	3	1.9E+07|2.0E+07|2.4E+07	6.40286e+07	2.13429e+07	3	0.6935	2.79289	0.0301	MQ	q	I
637	4104_ML_FinalNorm	AR-22Y-0060DHT	O75376	NCOR1	Nuclear receptor corepressor 1 (N-CoR) (N-CoR1)	0.799323	1.4E+08|1.3E+08|1.6E+08	4.25044e+08	1.41681e+08	3	1.9E+07|2.0E+07|2.4E+07	6.40286e+07	2.13429e+07	3	1	6.63835	0	MQ	q	I
638	4104_ML_FinalNorm	AR-WT-0000DHT	O75376	NCOR1	Nuclear receptor corepressor 1 (N-CoR) (N-CoR1)	0.799323	2.2E+07|1.9E+07|2.8E+07	6.8751e+07	2.2917e+07	3	1.9E+07|2.0E+07|2.4E+07	6.40286e+07	2.13429e+07	3	0.0806	1.07376	0.281	MQ	q	I
639	4104_ML_FinalNorm	AR-WT-0060DHT	O75376	NCOR1	Nuclear receptor corepressor 1 (N-CoR) (N-CoR1)	0.799323	1.7E+08|1.9E+08|1.8E+08	5.41627e+08	1.80542e+08	3	1.9E+07|2.0E+07|2.4E+07	6.40286e+07	2.13429e+07	3	1	8.45914	0	MQ	q	I
640	4104_ML_FinalNorm	AR-WT-0000DHT	O75381	PEX14	Peroxisomal membrane protein PEX14 (PTS1 receptor-docking protein) (Peroxin-14) (Peroxisomal membrane anchor protein PEX14)	0.823488	9.1E+05|3.6E+05|9.2E+05	2.18397e+06	727989	3	6.0E+06|8.6E+06|7.9E+06	2.25462e+07	7.5154e+06	3	0	0.0968663	0.6339	MQ	q	I
641	4104_ML_FinalNorm	AR-22Y-0000DHT	O75390	CS	Citrate synthase, mitochondrial (EC 2.3.3.1) (Citrate (Si)-synthase)	0.921983	2.3E+06|5.0E+06|NAN	7.32218e+06	3.66109e+06	3	3.4E+06|2.6E+06|2.8E+06	8.77879e+06	2.92626e+06	3	0.3269	1.25111	0.1759	MQ	q	I
642	4104_ML_FinalNorm	AR-22Y-0060DHT	O75390	CS	Citrate synthase, mitochondrial (EC 2.3.3.1) (Citrate (Si)-synthase)	0.921983	NAN|NAN|4.4E+06	4.42648e+06	4.42648e+06	3	3.4E+06|2.6E+06|2.8E+06	8.77879e+06	2.92626e+06	3	0.2226	1.51267	0.2096	MQ	q	I
643	4104_ML_FinalNorm	AR-WT-0000DHT	O75390	CS	Citrate synthase, mitochondrial (EC 2.3.3.1) (Citrate (Si)-synthase)	0.921983	3.1E+06|2.5E+06|3.1E+06	8.60954e+06	2.86985e+06	3	3.4E+06|2.6E+06|2.8E+06	8.77879e+06	2.92626e+06	3	0.027	0.98072	0.3876	MQ	q	I
644	4104_ML_FinalNorm	AR-WT-0060DHT	O75390	CS	Citrate synthase, mitochondrial (EC 2.3.3.1) (Citrate (Si)-synthase)	0.921983	1.5E+06|1.3E+06|2.3E+06	5.10091e+06	1.7003e+06	3	3.4E+06|2.6E+06|2.8E+06	8.77879e+06	2.92626e+06	3	0.009	0.581049	0.5064	MQ	q	I
645	4104_ML_FinalNorm	AR-22Y-0000DHT	O75396	SEC22B	Vesicle-trafficking protein SEC22b (ER-Golgi SNARE of 24 kDa) (ERS-24) (ERS24) (SEC22 vesicle-trafficking protein homolog B) (SEC22 vesicle-trafficking protein-like 1)	0	1.3E+07|1.2E+07|1.8E+07	4.23929e+07	1.4131e+07	3	4.2E+07|3.5E+07|3.8E+07	1.14822e+08	3.8274e+07	3	0.0026	0.369206	0.5771	MQ	q	I
646	4104_ML_FinalNorm	AR-22Y-0060DHT	O75396	SEC22B	Vesicle-trafficking protein SEC22b (ER-Golgi SNARE of 24 kDa) (ERS-24) (ERS24) (SEC22 vesicle-trafficking protein homolog B) (SEC22 vesicle-trafficking protein-like 1)	0	1.1E+07|5.0E+06|1.4E+07	3.05472e+07	1.01824e+07	3	4.2E+07|3.5E+07|3.8E+07	1.14822e+08	3.8274e+07	3	0.0012	0.26604	0.6	MQ	q	I
647	4104_ML_FinalNorm	AR-WT-0000DHT	O75396	SEC22B	Vesicle-trafficking protein SEC22b (ER-Golgi SNARE of 24 kDa) (ERS-24) (ERS24) (SEC22 vesicle-trafficking protein homolog B) (SEC22 vesicle-trafficking protein-like 1)	0	3.0E+07|2.2E+07|3.2E+07	8.37964e+07	2.79321e+07	3	4.2E+07|3.5E+07|3.8E+07	1.14822e+08	3.8274e+07	3	0.0146	0.729794	0.4632	MQ	q	I
648	4104_ML_FinalNorm	AR-WT-0060DHT	O75396	SEC22B	Vesicle-trafficking protein SEC22b (ER-Golgi SNARE of 24 kDa) (ERS-24) (ERS24) (SEC22 vesicle-trafficking protein homolog B) (SEC22 vesicle-trafficking protein-like 1)	0	1.7E+07|2.0E+07|2.5E+07	6.11409e+07	2.03803e+07	3	4.2E+07|3.5E+07|3.8E+07	1.14822e+08	3.8274e+07	3	0.007	0.532485	0.5258	MQ	q	I
649	4104_ML_FinalNorm	AR-22Y-0000DHT	O75400	PRPF40A	Pre-mRNA-processing factor 40 homolog A (Fas ligand-associated factor 1) (Formin-binding protein 11) (Formin-binding protein 3) (Huntingtin yeast partner A) (Huntingtin-interacting protein 10) (HIP-10) (Huntingtin-interacting protein A) (Renal carcinoma antigen NY-REN-6)	0.919823	7.4E+07|8.4E+07|7.5E+07	2.31975e+08	7.73249e+07	3	6.3E+07|6.1E+07|6.7E+07	1.90956e+08	6.36521e+07	3	0.0995	1.2148	0.2653	MQ	q	I
650	4104_ML_FinalNorm	AR-22Y-0060DHT	O75400	PRPF40A	Pre-mRNA-processing factor 40 homolog A (Fas ligand-associated factor 1) (Formin-binding protein 11) (Formin-binding protein 3) (Huntingtin yeast partner A) (Huntingtin-interacting protein 10) (HIP-10) (Huntingtin-interacting protein A) (Renal carcinoma antigen NY-REN-6)	0.919823	4.2E+07|5.9E+07|4.9E+07	1.49857e+08	4.99523e+07	3	6.3E+07|6.1E+07|6.7E+07	1.90956e+08	6.36521e+07	3	0.024	0.78477	0.4034	MQ	q	I
651	4104_ML_FinalNorm	AR-WT-0000DHT	O75400	PRPF40A	Pre-mRNA-processing factor 40 homolog A (Fas ligand-associated factor 1) (Formin-binding protein 11) (Formin-binding protein 3) (Huntingtin yeast partner A) (Huntingtin-interacting protein 10) (HIP-10) (Huntingtin-interacting protein A) (Renal carcinoma antigen NY-REN-6)	0.919823	8.5E+06|8.9E+06|8.6E+06	2.59377e+07	8.64592e+06	3	6.3E+07|6.1E+07|6.7E+07	1.90956e+08	6.36521e+07	3	0.0005	0.135831	0.6148	MQ	q	I
652	4104_ML_FinalNorm	AR-WT-0060DHT	O75400	PRPF40A	Pre-mRNA-processing factor 40 homolog A (Fas ligand-associated factor 1) (Formin-binding protein 11) (Formin-binding protein 3) (Huntingtin yeast partner A) (Huntingtin-interacting protein 10) (HIP-10) (Huntingtin-interacting protein A) (Renal carcinoma antigen NY-REN-6)	0.919823	1.5E+07|1.6E+07|1.3E+07	4.32949e+07	1.44316e+07	3	6.3E+07|6.1E+07|6.7E+07	1.90956e+08	6.36521e+07	3	0.0022	0.226727	0.5847	MQ	q	I
653	4104_ML_FinalNorm	AR-WT-0000DHT	O75410	TACC1	Transforming acidic coiled-coil-containing protein 1 (Gastric cancer antigen Ga55) (Taxin-1)	0.764298	1.7E+07|1.9E+07|1.6E+07	5.2964e+07	1.76547e+07	3	8.5E+06|7.6E+06|7.1E+06	2.30784e+07	7.69281e+06	3	1	2.29496	0	MQ	q	I
654	4104_ML_FinalNorm	AR-WT-0060DHT	O75410	TACC1	Transforming acidic coiled-coil-containing protein 1 (Gastric cancer antigen Ga55) (Taxin-1)	0.764298	8.6E+06|1.2E+07|1.0E+07	3.01571e+07	1.00524e+07	3	8.5E+06|7.6E+06|7.1E+06	2.30784e+07	7.69281e+06	3	0.2716	1.30672	0.192	MQ	q	I
655	4104_ML_FinalNorm	AR-22Y-0000DHT	O75420	GIGYF1	GRB10-interacting GYF protein 1 (PERQ amino acid-rich with GYF domain-containing protein 1)	0	1.6E+07|1.3E+07|1.3E+07	4.28523e+07	1.42841e+07	3	NAN|6.0E+05|5.4E+05	1.13397e+06	566987	3	1	25.193	0	MQ	q	I
656	4104_ML_FinalNorm	AR-WT-0000DHT	O75420	GIGYF1	GRB10-interacting GYF protein 1 (PERQ amino acid-rich with GYF domain-containing protein 1)	0	8.4E+06|9.2E+06|1.0E+07	2.76757e+07	9.22524e+06	3	NAN|6.0E+05|5.4E+05	1.13397e+06	566987	3	1	16.2706	0	MQ	q	I
657	4104_ML_FinalNorm	AR-WT-0060DHT	O75420	GIGYF1	GRB10-interacting GYF protein 1 (PERQ amino acid-rich with GYF domain-containing protein 1)	0	1.5E+07|1.6E+07|1.5E+07	4.60045e+07	1.53348e+07	3	NAN|6.0E+05|5.4E+05	1.13397e+06	566987	3	1	27.0462	0	MQ	q	I
658	4104_ML_FinalNorm	AR-22Y-0000DHT	O75436	VPS26A	Vacuolar protein sorting-associated protein 26A (Vesicle protein sorting 26A) (hVPS26)	0.702154	1.1E+07|1.3E+07|1.5E+07	3.82015e+07	1.27338e+07	3	2.1E+07|1.9E+07|2.4E+07	6.29847e+07	2.09949e+07	3	0.013	0.606521	0.4752	MQ	q	I
659	4104_ML_FinalNorm	AR-22Y-0060DHT	O75436	VPS26A	Vacuolar protein sorting-associated protein 26A (Vesicle protein sorting 26A) (hVPS26)	0.702154	5.7E+06|2.1E+07|2.6E+07	5.2338e+07	1.7446e+07	3	2.1E+07|1.9E+07|2.4E+07	6.29847e+07	2.09949e+07	3	0.0409	0.830964	0.3387	MQ	q	I
660	4104_ML_FinalNorm	AR-WT-0000DHT	O75436	VPS26A	Vacuolar protein sorting-associated protein 26A (Vesicle protein sorting 26A) (hVPS26)	0.702154	2.7E+06|3.0E+06|1.6E+06	7.35801e+06	2.45267e+06	3	2.1E+07|1.9E+07|2.4E+07	6.29847e+07	2.09949e+07	3	0.0001	0.116822	0.6286	MQ	q	I
661	4104_ML_FinalNorm	AR-WT-0060DHT	O75436	VPS26A	Vacuolar protein sorting-associated protein 26A (Vesicle protein sorting 26A) (hVPS26)	0.702154	6.3E+06|8.4E+06|8.0E+06	2.27644e+07	7.58814e+06	3	2.1E+07|1.9E+07|2.4E+07	6.29847e+07	2.09949e+07	3	0.0041	0.361428	0.5561	MQ	q	I
662	4104_ML_FinalNorm	AR-22Y-0060DHT	O75475	PSIP1	PC4 and SFRS1-interacting protein (CLL-associated antigen KW-7) (Dense fine speckles 70 kDa protein) (DFS 70) (Lens epithelium-derived growth factor) (Transcriptional coactivator p75/p52)	0.87875	2.9E+06|NAN|NAN	2.88883e+06	2.88883e+06	3	1.3E+06|2.8E+06|2.7E+06	6.8026e+06	2.26753e+06	3	0.0432	1.27399	0.3334	MQ	q	I
663	4104_ML_FinalNorm	AR-WT-0060DHT	O75475	PSIP1	PC4 and SFRS1-interacting protein (CLL-associated antigen KW-7) (Dense fine speckles 70 kDa protein) (DFS 70) (Lens epithelium-derived growth factor) (Transcriptional coactivator p75/p52)	0.87875	NAN|NAN|8.0E+05	800178	800178	3	1.3E+06|2.8E+06|2.7E+06	6.8026e+06	2.26753e+06	3	0.0021	0.352885	0.5865	MQ	q	I
664	4104_ML_FinalNorm	AR-22Y-0000DHT	O75489	NDUFS3	NADH dehydrogenase [ubiquinone] iron-sulfur protein 3, mitochondrial (EC 7.1.1.2) (Complex I-30kD) (CI-30kD) (NADH-ubiquinone oxidoreductase 30 kDa subunit)	0.736224	NAN|2.2E+06|3.1E+06	5.35208e+06	2.67604e+06	3	1.1E+06|1.1E+06|8.2E+05	2.98168e+06	993895	3	0.6667	2.69248	0.0404	MQ	q	I
665	4104_ML_FinalNorm	AR-22Y-0060DHT	O75489	NDUFS3	NADH dehydrogenase [ubiquinone] iron-sulfur protein 3, mitochondrial (EC 7.1.1.2) (Complex I-30kD) (CI-30kD) (NADH-ubiquinone oxidoreductase 30 kDa subunit)	0.736224	1.5E+06|2.0E+06|2.4E+06	5.8914e+06	1.9638e+06	3	1.1E+06|1.1E+06|8.2E+05	2.98168e+06	993895	3	0.8512	1.97586	0.0092	MQ	q	I
666	4104_ML_FinalNorm	AR-WT-0000DHT	O75489	NDUFS3	NADH dehydrogenase [ubiquinone] iron-sulfur protein 3, mitochondrial (EC 7.1.1.2) (Complex I-30kD) (CI-30kD) (NADH-ubiquinone oxidoreductase 30 kDa subunit)	0.736224	3.4E+06|2.8E+06|3.3E+06	9.55665e+06	3.18555e+06	3	1.1E+06|1.1E+06|8.2E+05	2.98168e+06	993895	3	1	3.20512	0	MQ	q	I
667	4104_ML_FinalNorm	AR-WT-0060DHT	O75489	NDUFS3	NADH dehydrogenase [ubiquinone] iron-sulfur protein 3, mitochondrial (EC 7.1.1.2) (Complex I-30kD) (CI-30kD) (NADH-ubiquinone oxidoreductase 30 kDa subunit)	0.736224	2.9E+06|2.9E+06|3.4E+06	9.1447e+06	3.04823e+06	3	1.1E+06|1.1E+06|8.2E+05	2.98168e+06	993895	3	1	3.06696	0	MQ	q	I
668	4104_ML_FinalNorm	AR-22Y-0000DHT	O75494	SRSF10	Serine/arginine-rich splicing factor 10 (40 kDa SR-repressor protein) (SRrp40) (FUS-interacting serine-arginine-rich protein 1) (Splicing factor SRp38) (Splicing factor, arginine/serine-rich 13A) (TLS-associated protein with Ser-Arg repeats) (TASR) (TLS-associated protein with SR repeats) (TLS-associated serine-arginine protein) (TLS-associated SR protein)	0.895793	2.9E+07|3.2E+07|5.4E+07	1.14731e+08	3.82436e+07	3	9.6E+06|9.4E+06|1.1E+07	2.96662e+07	9.88872e+06	3	1	3.86739	0	MQ	q	I
669	4104_ML_FinalNorm	AR-22Y-0060DHT	O75494	SRSF10	Serine/arginine-rich splicing factor 10 (40 kDa SR-repressor protein) (SRrp40) (FUS-interacting serine-arginine-rich protein 1) (Splicing factor SRp38) (Splicing factor, arginine/serine-rich 13A) (TLS-associated protein with Ser-Arg repeats) (TASR) (TLS-associated protein with SR repeats) (TLS-associated serine-arginine protein) (TLS-associated SR protein)	0.895793	1.5E+07|1.4E+07|1.2E+07	4.02745e+07	1.34248e+07	3	9.6E+06|9.4E+06|1.1E+07	2.96662e+07	9.88872e+06	3	0.3295	1.35759	0.1749	MQ	q	I
670	4104_ML_FinalNorm	AR-22Y-0000DHT	O75521	ECI2	Enoyl-CoA delta isomerase 2 (EC 5.3.3.8) (DRS-1) (Delta(3),delta(2)-enoyl-CoA isomerase) (D3,D2-enoyl-CoA isomerase) (Diazepam-binding inhibitor-related protein 1) (DBI-related protein 1) (Dodecenoyl-CoA isomerase) (Hepatocellular carcinoma-associated antigen 88) (Peroxisomal 3,2-trans-enoyl-CoA isomerase) (pECI) (Renal carcinoma antigen NY-REN-1)	0.679399	4.5E+06|2.3E+07|3.0E+07	5.6717e+07	1.89057e+07	3	1.1E+07|7.6E+06|1.1E+07	3.02938e+07	1.00979e+07	3	0.6679	1.87223	0.0398	MQ	q	I
671	4104_ML_FinalNorm	AR-22Y-0060DHT	O75521	ECI2	Enoyl-CoA delta isomerase 2 (EC 5.3.3.8) (DRS-1) (Delta(3),delta(2)-enoyl-CoA isomerase) (D3,D2-enoyl-CoA isomerase) (Diazepam-binding inhibitor-related protein 1) (DBI-related protein 1) (Dodecenoyl-CoA isomerase) (Hepatocellular carcinoma-associated antigen 88) (Peroxisomal 3,2-trans-enoyl-CoA isomerase) (pECI) (Renal carcinoma antigen NY-REN-1)	0.679399	1.3E+07|6.8E+06|1.3E+07	3.3109e+07	1.10363e+07	3	1.1E+07|7.6E+06|1.1E+07	3.02938e+07	1.00979e+07	3	0.095	1.09293	0.2674	MQ	q	I
672	4104_ML_FinalNorm	AR-WT-0000DHT	O75521	ECI2	Enoyl-CoA delta isomerase 2 (EC 5.3.3.8) (DRS-1) (Delta(3),delta(2)-enoyl-CoA isomerase) (D3,D2-enoyl-CoA isomerase) (Diazepam-binding inhibitor-related protein 1) (DBI-related protein 1) (Dodecenoyl-CoA isomerase) (Hepatocellular carcinoma-associated antigen 88) (Peroxisomal 3,2-trans-enoyl-CoA isomerase) (pECI) (Renal carcinoma antigen NY-REN-1)	0.679399	3.4E+06|3.2E+06|2.5E+06	9.01675e+06	3.00558e+06	3	1.1E+07|7.6E+06|1.1E+07	3.02938e+07	1.00979e+07	3	0.0095	0.297643	0.5013	MQ	q	I
673	4104_ML_FinalNorm	AR-WT-0060DHT	O75521	ECI2	Enoyl-CoA delta isomerase 2 (EC 5.3.3.8) (DRS-1) (Delta(3),delta(2)-enoyl-CoA isomerase) (D3,D2-enoyl-CoA isomerase) (Diazepam-binding inhibitor-related protein 1) (DBI-related protein 1) (Dodecenoyl-CoA isomerase) (Hepatocellular carcinoma-associated antigen 88) (Peroxisomal 3,2-trans-enoyl-CoA isomerase) (pECI) (Renal carcinoma antigen NY-REN-1)	0.679399	NAN|1.6E+06|1.6E+06	3.1715e+06	1.58575e+06	3	1.1E+07|7.6E+06|1.1E+07	3.02938e+07	1.00979e+07	3	0.0017	0.157037	0.5923	MQ	q	I
674	4104_ML_FinalNorm	AR-22Y-0000DHT	O75533	SF3B1	Splicing factor 3B subunit 1 (Pre-mRNA-splicing factor SF3b 155 kDa subunit) (SF3b155) (Spliceosome-associated protein 155) (SAP 155)	0.978282	4.8E+06|4.5E+06|3.8E+06	1.30547e+07	4.35156e+06	3	2.3E+08|2.4E+08|2.5E+08	7.16779e+08	2.38926e+08	3	0.0001	0.018213	0.6286	MQ	q	I
675	4104_ML_FinalNorm	AR-22Y-0060DHT	O75533	SF3B1	Splicing factor 3B subunit 1 (Pre-mRNA-splicing factor SF3b 155 kDa subunit) (SF3b155) (Spliceosome-associated protein 155) (SAP 155)	0.978282	6.8E+06|9.9E+06|6.4E+06	2.3162e+07	7.72068e+06	3	2.3E+08|2.4E+08|2.5E+08	7.16779e+08	2.38926e+08	3	0.0005	0.0323141	0.6148	MQ	q	I
676	4104_ML_FinalNorm	AR-WT-0000DHT	O75533	SF3B1	Splicing factor 3B subunit 1 (Pre-mRNA-splicing factor SF3b 155 kDa subunit) (SF3b155) (Spliceosome-associated protein 155) (SAP 155)	0.978282	7.5E+07|7.7E+07|8.3E+07	2.35328e+08	7.84427e+07	3	2.3E+08|2.4E+08|2.5E+08	7.16779e+08	2.38926e+08	3	0.0146	0.328314	0.4632	MQ	q	I
677	4104_ML_FinalNorm	AR-WT-0060DHT	O75533	SF3B1	Splicing factor 3B subunit 1 (Pre-mRNA-splicing factor SF3b 155 kDa subunit) (SF3b155) (Spliceosome-associated protein 155) (SAP 155)	0.978282	7.4E+07|6.9E+07|6.7E+07	2.09199e+08	6.9733e+07	3	2.3E+08|2.4E+08|2.5E+08	7.16779e+08	2.38926e+08	3	0.013	0.29186	0.4752	MQ	q	I
678	4104_ML_FinalNorm	AR-22Y-0000DHT	O75534	CSDE1	Cold shock domain-containing protein E1 (N-ras upstream gene protein) (Protein UNR)	0.91086	1.7E+06|3.2E+06|4.3E+06	9.26091e+06	3.08697e+06	3	2.1E+07|2.0E+07|1.8E+07	5.87719e+07	1.95906e+07	3	0.0023	0.157574	0.5825	MQ	q	I
679	4104_ML_FinalNorm	AR-22Y-0060DHT	O75534	CSDE1	Cold shock domain-containing protein E1 (N-ras upstream gene protein) (Protein UNR)	0.91086	5.3E+06|NAN|NAN	5.30035e+06	5.30035e+06	3	2.1E+07|2.0E+07|1.8E+07	5.87719e+07	1.95906e+07	3	0.002	0.270556	0.5878	MQ	q	I
680	4104_ML_FinalNorm	AR-WT-0000DHT	O75534	CSDE1	Cold shock domain-containing protein E1 (N-ras upstream gene protein) (Protein UNR)	0.91086	2.6E+07|3.2E+07|2.8E+07	8.58629e+07	2.8621e+07	3	2.1E+07|2.0E+07|1.8E+07	5.87719e+07	1.95906e+07	3	0.4888	1.46095	0.0984	MQ	q	I
681	4104_ML_FinalNorm	AR-WT-0060DHT	O75534	CSDE1	Cold shock domain-containing protein E1 (N-ras upstream gene protein) (Protein UNR)	0.91086	2.3E+07|1.6E+07|2.4E+07	6.28213e+07	2.09404e+07	3	2.1E+07|2.0E+07|1.8E+07	5.87719e+07	1.95906e+07	3	0.0606	1.0689	0.3038	MQ	q	I
682	4104_ML_FinalNorm	AR-22Y-0000DHT	O75556	SCGB2A1	Mammaglobin-B (Lacryglobin) (Lipophilin-C) (Mammaglobin-2) (Secretoglobin family 2A member 1)	0.349576	3.8E+06|NAN|NAN	3.78953e+06	3.78953e+06	3	8.1E+03|8.3E+03|6.4E+03	22862.7	7620.91	3	0.3333	497.255	0.1476	MQ	q	I
683	4104_ML_FinalNorm	AR-WT-0000DHT	O75556	SCGB2A1	Mammaglobin-B (Lacryglobin) (Lipophilin-C) (Mammaglobin-2) (Secretoglobin family 2A member 1)	0.349576	1.2E+07|1.0E+07|1.1E+07	3.24614e+07	1.08205e+07	3	8.1E+03|8.3E+03|6.4E+03	22862.7	7620.91	3	1	1419.84	0	MQ	q	I
684	4104_ML_FinalNorm	AR-22Y-0000DHT	O75569	PRKRA	Interferon-inducible double-stranded RNA-dependent protein kinase activator A (PKR-associated protein X) (PKR-associating protein X) (Protein activator of the interferon-induced protein kinase) (Protein kinase, interferon-inducible double-stranded RNA-dependent activator)	0.762656	NAN|3.0E+06|3.2E+06	6.14963e+06	3.07481e+06	3	2.1E+06|3.1E+06|3.3E+06	8.57847e+06	2.85949e+06	3	0.0379	1.0753	0.346	MQ	q	I
685	4104_ML_FinalNorm	AR-22Y-0060DHT	O75569	PRKRA	Interferon-inducible double-stranded RNA-dependent protein kinase activator A (PKR-associated protein X) (PKR-associating protein X) (Protein activator of the interferon-induced protein kinase) (Protein kinase, interferon-inducible double-stranded RNA-dependent activator)	0.762656	NAN|2.4E+06|2.9E+06	5.27781e+06	2.63891e+06	3	2.1E+06|3.1E+06|3.3E+06	8.57847e+06	2.85949e+06	3	0.0289	0.922858	0.3787	MQ	q	I
686	4104_ML_FinalNorm	AR-WT-0000DHT	O75569	PRKRA	Interferon-inducible double-stranded RNA-dependent protein kinase activator A (PKR-associated protein X) (PKR-associating protein X) (Protein activator of the interferon-induced protein kinase) (Protein kinase, interferon-inducible double-stranded RNA-dependent activator)	0.762656	NAN|NAN|4.3E+05	426388	426388	3	2.1E+06|3.1E+06|3.3E+06	8.57847e+06	2.85949e+06	3	0.0003	0.149113	0.6208	MQ	q	I
687	4104_ML_FinalNorm	AR-WT-0060DHT	O75569	PRKRA	Interferon-inducible double-stranded RNA-dependent protein kinase activator A (PKR-associated protein X) (PKR-associating protein X) (Protein activator of the interferon-induced protein kinase) (Protein kinase, interferon-inducible double-stranded RNA-dependent activator)	0.762656	4.9E+05|NAN|NAN	492885	492885	3	2.1E+06|3.1E+06|3.3E+06	8.57847e+06	2.85949e+06	3	0.0004	0.172368	0.6178	MQ	q	I
688	4104_ML_FinalNorm	AR-WT-0000DHT	O75575	CRCP	DNA-directed RNA polymerase III subunit RPC9 (RNA polymerase III subunit C9) (Calcitonin gene-related peptide-receptor component protein) (CGRP-RCP) (CGRP-receptor component protein) (CGRPRCP) (HsC17)	0	9.4E+06|9.4E+06|8.0E+06	2.68318e+07	8.94393e+06	3	NAN|3.1E+05|2.4E+05	545648	272824	3	1	32.7828	0	MQ	q	I
689	4104_ML_FinalNorm	AR-WT-0060DHT	O75575	CRCP	DNA-directed RNA polymerase III subunit RPC9 (RNA polymerase III subunit C9) (Calcitonin gene-related peptide-receptor component protein) (CGRP-RCP) (CGRP-receptor component protein) (CGRPRCP) (HsC17)	0	7.5E+06|7.1E+06|6.8E+06	2.14402e+07	7.14675e+06	3	NAN|3.1E+05|2.4E+05	545648	272824	3	1	26.1954	0	MQ	q	I
690	4104_ML_FinalNorm	AR-WT-0000DHT	O75582	RPS6KA5	Ribosomal protein S6 kinase alpha-5 (S6K-alpha-5) (EC 2.7.11.1) (90 kDa ribosomal protein S6 kinase 5) (Nuclear mitogen- and stress-activated protein kinase 1) (RSK-like protein kinase) (RSKL)	0.308233	3.1E+06|2.5E+06|3.9E+06	9.37675e+06	3.12558e+06	3	4.7E+06|2.7E+06|3.1E+06	1.0469e+07	3.48967e+06	3	0.0414	0.895666	0.3378	MQ	q	I
691	4104_ML_FinalNorm	AR-WT-0060DHT	O75582	RPS6KA5	Ribosomal protein S6 kinase alpha-5 (S6K-alpha-5) (EC 2.7.11.1) (90 kDa ribosomal protein S6 kinase 5) (Nuclear mitogen- and stress-activated protein kinase 1) (RSK-like protein kinase) (RSKL)	0.308233	1.8E+06|2.8E+06|1.8E+06	6.37534e+06	2.12511e+06	3	4.7E+06|2.7E+06|3.1E+06	1.0469e+07	3.48967e+06	3	0.0181	0.608972	0.4393	MQ	q	I
692	4104_ML_FinalNorm	AR-22Y-0000DHT	O75643	SNRNP200	U5 small nuclear ribonucleoprotein 200 kDa helicase (EC 3.6.4.13) (Activating signal cointegrator 1 complex subunit 3-like 1) (BRR2 homolog) (U5 snRNP-specific 200 kDa protein) (U5-200KD)	0.971242	1.7E+06|1.2E+07|1.2E+07	2.59816e+07	8.66052e+06	3	2.8E+08|2.7E+08|2.7E+08	8.24302e+08	2.74767e+08	3	0	0.0315194	0.6339	MQ	q	I
693	4104_ML_FinalNorm	AR-22Y-0060DHT	O75643	SNRNP200	U5 small nuclear ribonucleoprotein 200 kDa helicase (EC 3.6.4.13) (Activating signal cointegrator 1 complex subunit 3-like 1) (BRR2 homolog) (U5 snRNP-specific 200 kDa protein) (U5-200KD)	0.971242	5.8E+06|5.7E+06|9.8E+06	2.12506e+07	7.08354e+06	3	2.8E+08|2.7E+08|2.7E+08	8.24302e+08	2.74767e+08	3	0	0.0257801	0.6339	MQ	q	I
694	4104_ML_FinalNorm	AR-WT-0000DHT	O75643	SNRNP200	U5 small nuclear ribonucleoprotein 200 kDa helicase (EC 3.6.4.13) (Activating signal cointegrator 1 complex subunit 3-like 1) (BRR2 homolog) (U5 snRNP-specific 200 kDa protein) (U5-200KD)	0.971242	1.8E+07|1.5E+07|2.0E+07	5.20913e+07	1.73638e+07	3	2.8E+08|2.7E+08|2.7E+08	8.24302e+08	2.74767e+08	3	0	0.0631944	0.6339	MQ	q	I
695	4104_ML_FinalNorm	AR-WT-0060DHT	O75643	SNRNP200	U5 small nuclear ribonucleoprotein 200 kDa helicase (EC 3.6.4.13) (Activating signal cointegrator 1 complex subunit 3-like 1) (BRR2 homolog) (U5 snRNP-specific 200 kDa protein) (U5-200KD)	0.971242	7.2E+06|9.8E+06|9.2E+06	2.61462e+07	8.7154e+06	3	2.8E+08|2.7E+08|2.7E+08	8.24302e+08	2.74767e+08	3	0	0.0317192	0.6339	MQ	q	I
696	4104_ML_FinalNorm	AR-22Y-0000DHT	O75663	TIPRL	TIP41-like protein (Putative MAPK-activating protein PM10) (Type 2A-interacting protein) (TIP)	0.84385	2.2E+07|3.0E+07|3.3E+07	8.43678e+07	2.81226e+07	3	3.3E+06|4.2E+06|6.0E+06	1.34943e+07	4.49809e+06	3	1	6.25212	0	MQ	q	I
697	4104_ML_FinalNorm	AR-22Y-0060DHT	O75663	TIPRL	TIP41-like protein (Putative MAPK-activating protein PM10) (Type 2A-interacting protein) (TIP)	0.84385	4.8E+07|4.3E+07|5.1E+07	1.43027e+08	4.76755e+07	3	3.3E+06|4.2E+06|6.0E+06	1.34943e+07	4.49809e+06	3	1	10.5991	0	MQ	q	I
698	4104_ML_FinalNorm	AR-WT-0000DHT	O75663	TIPRL	TIP41-like protein (Putative MAPK-activating protein PM10) (Type 2A-interacting protein) (TIP)	0.84385	7.6E+06|7.2E+06|7.3E+06	2.20673e+07	7.35576e+06	3	3.3E+06|4.2E+06|6.0E+06	1.34943e+07	4.49809e+06	3	0.3402	1.63531	0.1438	MQ	q	I
699	4104_ML_FinalNorm	AR-WT-0060DHT	O75663	TIPRL	TIP41-like protein (Putative MAPK-activating protein PM10) (Type 2A-interacting protein) (TIP)	0.84385	7.4E+06|6.6E+06|6.6E+06	2.05876e+07	6.86255e+06	3	3.3E+06|4.2E+06|6.0E+06	1.34943e+07	4.49809e+06	3	0.2535	1.52566	0.199	MQ	q	I
700	4104_ML_FinalNorm	AR-22Y-0000DHT	O75691	UTP20	Small subunit processome component 20 homolog (Down-regulated in metastasis protein) (Novel nucleolar protein 73) (NNP73) (Protein Key-1A6)	0.707176	3.2E+08|3.1E+08|3.7E+08	9.94647e+08	3.31549e+08	3	2.9E+05|6.5E+06|6.3E+06	1.31115e+07	4.3705e+06	3	0.9772	75.8607	0.0012	MQ	q	I
701	4104_ML_FinalNorm	AR-22Y-0060DHT	O75691	UTP20	Small subunit processome component 20 homolog (Down-regulated in metastasis protein) (Novel nucleolar protein 73) (NNP73) (Protein Key-1A6)	0.707176	3.4E+08|3.1E+08|3.5E+08	1.00987e+09	3.36623e+08	3	2.9E+05|6.5E+06|6.3E+06	1.31115e+07	4.3705e+06	3	0.9779	77.0217	0.0011	MQ	q	I
702	4104_ML_FinalNorm	AR-WT-0000DHT	O75691	UTP20	Small subunit processome component 20 homolog (Down-regulated in metastasis protein) (Novel nucleolar protein 73) (NNP73) (Protein Key-1A6)	0.707176	3.5E+07|3.4E+07|3.7E+07	1.06753e+08	3.55844e+07	3	2.9E+05|6.5E+06|6.3E+06	1.31115e+07	4.3705e+06	3	0.602	8.14195	0.0755	MQ	q	I
703	4104_ML_FinalNorm	AR-WT-0060DHT	O75691	UTP20	Small subunit processome component 20 homolog (Down-regulated in metastasis protein) (Novel nucleolar protein 73) (NNP73) (Protein Key-1A6)	0.707176	5.7E+07|7.6E+07|6.9E+07	2.01991e+08	6.73305e+07	3	2.9E+05|6.5E+06|6.3E+06	1.31115e+07	4.3705e+06	3	0.8106	15.4057	0.0138	MQ	q	I
704	4104_ML_FinalNorm	AR-22Y-0000DHT	O75694	NUP155	Nuclear pore complex protein Nup155 (155 kDa nucleoporin) (Nucleoporin Nup155)	0.873707	NAN|5.6E+06|NAN	5.56938e+06	5.56938e+06	3	2.6E+07|2.4E+07|2.4E+07	7.39616e+07	2.46539e+07	3	0.0009	0.225903	0.6054	MQ	q	I
705	4104_ML_FinalNorm	AR-WT-0000DHT	O75694	NUP155	Nuclear pore complex protein Nup155 (155 kDa nucleoporin) (Nucleoporin Nup155)	0.873707	2.6E+06|1.9E+06|7.6E+05	5.2019e+06	1.73397e+06	3	2.6E+07|2.4E+07|2.4E+07	7.39616e+07	2.46539e+07	3	0.0002	0.0703324	0.6234	MQ	q	I
706	4104_ML_FinalNorm	AR-WT-0060DHT	O75694	NUP155	Nuclear pore complex protein Nup155 (155 kDa nucleoporin) (Nucleoporin Nup155)	0.873707	NAN|NAN|4.1E+05	407371	407371	3	2.6E+07|2.4E+07|2.4E+07	7.39616e+07	2.46539e+07	3	0	0.0165236	0.6339	MQ	q	I
707	4104_ML_FinalNorm	AR-22Y-0000DHT	O75717	WDHD1	WD repeat and HMG-box DNA-binding protein 1 (Acidic nucleoplasmic DNA-binding protein 1) (And-1)	0.799019	1.4E+06|NAN|NAN	1.40028e+06	1.40028e+06	3	6.5E+07|5.8E+07|6.9E+07	1.91547e+08	6.38489e+07	3	0	0.0219312	0.6339	MQ	q	I
708	4104_ML_FinalNorm	AR-WT-0000DHT	O75717	WDHD1	WD repeat and HMG-box DNA-binding protein 1 (Acidic nucleoplasmic DNA-binding protein 1) (And-1)	0.799019	2.1E+07|1.7E+07|2.1E+07	5.93074e+07	1.97691e+07	3	6.5E+07|5.8E+07|6.9E+07	1.91547e+08	6.38489e+07	3	0.0051	0.309624	0.5449	MQ	q	I
709	4104_ML_FinalNorm	AR-WT-0060DHT	O75717	WDHD1	WD repeat and HMG-box DNA-binding protein 1 (Acidic nucleoplasmic DNA-binding protein 1) (And-1)	0.799019	1.9E+07|1.5E+07|1.9E+07	5.3873e+07	1.79577e+07	3	6.5E+07|5.8E+07|6.9E+07	1.91547e+08	6.38489e+07	3	0.0041	0.281253	0.5561	MQ	q	I
710	4104_ML_FinalNorm	AR-WT-0000DHT	O75808	CAPN15	Calpain-15 (EC 3.4.22.-) (Small optic lobes homolog)	0.308233	2.7E+06|1.1E+06|1.8E+06	5.68996e+06	1.89665e+06	3	6.0E+03|7.1E+03|9.4E+03	22482.9	7494.3	3	1	253.08	0	MQ	q	I
711	4104_ML_FinalNorm	AR-WT-0060DHT	O75808	CAPN15	Calpain-15 (EC 3.4.22.-) (Small optic lobes homolog)	0.308233	8.5E+05|NAN|7.9E+05	1.64083e+06	820416	3	6.0E+03|7.1E+03|9.4E+03	22482.9	7494.3	3	0.6667	109.472	0.0404	MQ	q	I
712	4104_ML_FinalNorm	AR-22Y-0060DHT	O75815	BCAR3	Breast cancer anti-estrogen resistance protein 3 (Novel SH2-containing protein 2) (SH2 domain-containing protein 3B)	0	NAN|1.3E+06|NAN	1.33294e+06	1.33294e+06	3	8.1E+06|1.1E+07|5.6E+06	2.44385e+07	8.14617e+06	3	0.003	0.163628	0.5707	MQ	q	I
713	4104_ML_FinalNorm	AR-WT-0000DHT	O75815	BCAR3	Breast cancer anti-estrogen resistance protein 3 (Novel SH2-containing protein 2) (SH2 domain-containing protein 3B)	0	3.6E+07|3.9E+07|3.8E+07	1.13519e+08	3.78398e+07	3	8.1E+06|1.1E+07|5.6E+06	2.44385e+07	8.14617e+06	3	0.9999	4.6451	0	MQ	q	I
714	4104_ML_FinalNorm	AR-WT-0060DHT	O75815	BCAR3	Breast cancer anti-estrogen resistance protein 3 (Novel SH2-containing protein 2) (SH2 domain-containing protein 3B)	0	3.7E+07|3.1E+07|2.8E+07	9.59911e+07	3.1997e+07	3	8.1E+06|1.1E+07|5.6E+06	2.44385e+07	8.14617e+06	3	0.9986	3.92786	0	MQ	q	I
715	4104_ML_FinalNorm	AR-22Y-0000DHT	O75821	EIF3G	Eukaryotic translation initiation factor 3 subunit G (eIF3g) (Eukaryotic translation initiation factor 3 RNA-binding subunit) (eIF-3 RNA-binding subunit) (Eukaryotic translation initiation factor 3 subunit 4) (eIF-3-delta) (eIF3 p42) (eIF3 p44)	0.934099	NAN|4.5E+06|4.5E+06	9.04658e+06	4.52329e+06	3	2.0E+07|1.6E+07|3.0E+07	6.55397e+07	2.18466e+07	3	0.0005	0.207048	0.6148	MQ	q	I
716	4104_ML_FinalNorm	AR-22Y-0060DHT	O75821	EIF3G	Eukaryotic translation initiation factor 3 subunit G (eIF3g) (Eukaryotic translation initiation factor 3 RNA-binding subunit) (eIF-3 RNA-binding subunit) (Eukaryotic translation initiation factor 3 subunit 4) (eIF-3-delta) (eIF3 p42) (eIF3 p44)	0.934099	NAN|2.1E+06|NAN	2.1185e+06	2.1185e+06	3	2.0E+07|1.6E+07|3.0E+07	6.55397e+07	2.18466e+07	3	0	0.0969719	0.6339	MQ	q	I
717	4104_ML_FinalNorm	AR-WT-0000DHT	O75821	EIF3G	Eukaryotic translation initiation factor 3 subunit G (eIF3g) (Eukaryotic translation initiation factor 3 RNA-binding subunit) (eIF-3 RNA-binding subunit) (Eukaryotic translation initiation factor 3 subunit 4) (eIF-3-delta) (eIF3 p42) (eIF3 p44)	0.934099	1.5E+07|1.2E+07|8.5E+06	3.56221e+07	1.1874e+07	3	2.0E+07|1.6E+07|3.0E+07	6.55397e+07	2.18466e+07	3	0.0156	0.54352	0.4556	MQ	q	I
718	4104_ML_FinalNorm	AR-WT-0060DHT	O75821	EIF3G	Eukaryotic translation initiation factor 3 subunit G (eIF3g) (Eukaryotic translation initiation factor 3 RNA-binding subunit) (eIF-3 RNA-binding subunit) (Eukaryotic translation initiation factor 3 subunit 4) (eIF-3-delta) (eIF3 p42) (eIF3 p44)	0.934099	8.6E+06|1.4E+07|5.7E+06	2.79432e+07	9.3144e+06	3	2.0E+07|1.6E+07|3.0E+07	6.55397e+07	2.18466e+07	3	0.0095	0.426355	0.5013	MQ	q	I
719	4104_ML_FinalNorm	AR-22Y-0000DHT	O75822	EIF3J	Eukaryotic translation initiation factor 3 subunit J (eIF3j) (Eukaryotic translation initiation factor 3 subunit 1) (eIF-3-alpha) (eIF3 p35)	0.656321	7.5E+06|1.2E+07|1.0E+07	2.90759e+07	9.69196e+06	3	2.5E+07|1.4E+07|1.7E+07	5.5523e+07	1.85077e+07	3	0.0134	0.523673	0.4728	MQ	q	I
720	4104_ML_FinalNorm	AR-22Y-0060DHT	O75822	EIF3J	Eukaryotic translation initiation factor 3 subunit J (eIF3j) (Eukaryotic translation initiation factor 3 subunit 1) (eIF-3-alpha) (eIF3 p35)	0.656321	3.7E+06|NAN|NAN	3.6703e+06	3.6703e+06	3	2.5E+07|1.4E+07|1.7E+07	5.5523e+07	1.85077e+07	3	0.0002	0.198312	0.6234	MQ	q	I
721	4104_ML_FinalNorm	AR-WT-0000DHT	O75822	EIF3J	Eukaryotic translation initiation factor 3 subunit J (eIF3j) (Eukaryotic translation initiation factor 3 subunit 1) (eIF-3-alpha) (eIF3 p35)	0.656321	6.2E+06|5.7E+06|3.8E+06	1.57354e+07	5.24514e+06	3	2.5E+07|1.4E+07|1.7E+07	5.5523e+07	1.85077e+07	3	0.0023	0.283403	0.5825	MQ	q	I
722	4104_ML_FinalNorm	AR-WT-0060DHT	O75822	EIF3J	Eukaryotic translation initiation factor 3 subunit J (eIF3j) (Eukaryotic translation initiation factor 3 subunit 1) (eIF-3-alpha) (eIF3 p35)	0.656321	1.2E+06|2.6E+06|4.2E+06	8.02704e+06	2.67568e+06	3	2.5E+07|1.4E+07|1.7E+07	5.5523e+07	1.85077e+07	3	0.0004	0.144571	0.6178	MQ	q	I
723	4104_ML_FinalNorm	AR-22Y-0000DHT	O75828	CBR3	Carbonyl reductase [NADPH] 3 (EC 1.1.1.184) (NADPH-dependent carbonyl reductase 3) (Short chain dehydrogenase/reductase family 21C member 2)	0.816712	1.1E+07|1.4E+07|1.4E+07	3.90871e+07	1.3029e+07	3	1.3E+06|1.5E+06|2.4E+06	5.10641e+06	1.70214e+06	3	1	7.65453	0	MQ	q	I
724	4104_ML_FinalNorm	AR-22Y-0060DHT	O75828	CBR3	Carbonyl reductase [NADPH] 3 (EC 1.1.1.184) (NADPH-dependent carbonyl reductase 3) (Short chain dehydrogenase/reductase family 21C member 2)	0.816712	2.8E+06|NAN|NAN	2.7667e+06	2.7667e+06	3	1.3E+06|1.5E+06|2.4E+06	5.10641e+06	1.70214e+06	3	0.0904	1.62543	0.2728	MQ	q	I
725	4104_ML_FinalNorm	AR-WT-0000DHT	O75828	CBR3	Carbonyl reductase [NADPH] 3 (EC 1.1.1.184) (NADPH-dependent carbonyl reductase 3) (Short chain dehydrogenase/reductase family 21C member 2)	0.816712	1.0E+06|NAN|7.9E+05	1.81605e+06	908024	3	1.3E+06|1.5E+06|2.4E+06	5.10641e+06	1.70214e+06	3	0.0302	0.533462	0.3723	MQ	q	I
726	4104_ML_FinalNorm	AR-WT-0060DHT	O75828	CBR3	Carbonyl reductase [NADPH] 3 (EC 1.1.1.184) (NADPH-dependent carbonyl reductase 3) (Short chain dehydrogenase/reductase family 21C member 2)	0.816712	NAN|1.0E+06|7.1E+05	1.70635e+06	853176	3	1.3E+06|1.5E+06|2.4E+06	5.10641e+06	1.70214e+06	3	0.0285	0.501239	0.3799	MQ	q	I
727	4104_ML_FinalNorm	AR-22Y-0000DHT	O75832	PSMD10	26S proteasome non-ATPase regulatory subunit 10 (26S proteasome regulatory subunit p28) (Gankyrin) (p28(GANK))	0.628895	1.3E+06|9.7E+05|1.4E+06	3.67482e+06	1.22494e+06	3	3.1E+06|3.7E+06|4.4E+06	1.11558e+07	3.71859e+06	3	0.0022	0.32941	0.5847	MQ	q	I
728	4104_ML_FinalNorm	AR-22Y-0060DHT	O75832	PSMD10	26S proteasome non-ATPase regulatory subunit 10 (26S proteasome regulatory subunit p28) (Gankyrin) (p28(GANK))	0.628895	2.1E+06|1.8E+06|2.8E+06	6.68956e+06	2.22985e+06	3	3.1E+06|3.7E+06|4.4E+06	1.11558e+07	3.71859e+06	3	0.011	0.59965	0.4902	MQ	q	I
729	4104_ML_FinalNorm	AR-WT-0000DHT	O75832	PSMD10	26S proteasome non-ATPase regulatory subunit 10 (26S proteasome regulatory subunit p28) (Gankyrin) (p28(GANK))	0.628895	8.0E+05|NAN|3.7E+05	1.16939e+06	584697	3	3.1E+06|3.7E+06|4.4E+06	1.11558e+07	3.71859e+06	3	0.0002	0.157236	0.6234	MQ	q	I
730	4104_ML_FinalNorm	AR-WT-0060DHT	O75832	PSMD10	26S proteasome non-ATPase regulatory subunit 10 (26S proteasome regulatory subunit p28) (Gankyrin) (p28(GANK))	0.628895	3.3E+05|2.8E+05|1.1E+06	1.69295e+06	564317	3	3.1E+06|3.7E+06|4.4E+06	1.11558e+07	3.71859e+06	3	0.0005	0.151756	0.6148	MQ	q	I
731	4104_ML_FinalNorm	AR-22Y-0000DHT	O75844	ZMPSTE24	CAAX prenyl protease 1 homolog (EC 3.4.24.84) (Farnesylated proteins-converting enzyme 1) (FACE-1) (Prenyl protein-specific endoprotease 1) (Zinc metalloproteinase Ste24 homolog)	0.584656	1.2E+06|8.7E+05|NAN	2.04306e+06	1.02153e+06	3	1.2E+06|1.6E+06|1.8E+06	4.61302e+06	1.53767e+06	3	0.0164	0.664336	0.4498	MQ	q	I
732	4104_ML_FinalNorm	AR-22Y-0060DHT	O75844	ZMPSTE24	CAAX prenyl protease 1 homolog (EC 3.4.24.84) (Farnesylated proteins-converting enzyme 1) (FACE-1) (Prenyl protein-specific endoprotease 1) (Zinc metalloproteinase Ste24 homolog)	0.584656	1.3E+06|NAN|4.6E+06	5.91242e+06	2.95621e+06	3	1.2E+06|1.6E+06|1.8E+06	4.61302e+06	1.53767e+06	3	0.3445	1.92252	0.1404	MQ	q	I
733	4104_ML_FinalNorm	AR-WT-0000DHT	O75844	ZMPSTE24	CAAX prenyl protease 1 homolog (EC 3.4.24.84) (Farnesylated proteins-converting enzyme 1) (FACE-1) (Prenyl protein-specific endoprotease 1) (Zinc metalloproteinase Ste24 homolog)	0.584656	NAN|1.6E+06|NAN	1.55143e+06	1.55143e+06	3	1.2E+06|1.6E+06|1.8E+06	4.61302e+06	1.53767e+06	3	0.0143	1.00895	0.4655	MQ	q	I
734	4104_ML_FinalNorm	AR-WT-0060DHT	O75844	ZMPSTE24	CAAX prenyl protease 1 homolog (EC 3.4.24.84) (Farnesylated proteins-converting enzyme 1) (FACE-1) (Prenyl protein-specific endoprotease 1) (Zinc metalloproteinase Ste24 homolog)	0.584656	2.6E+05|2.5E+05|1.2E+06	1.65665e+06	552215	3	1.2E+06|1.6E+06|1.8E+06	4.61302e+06	1.53767e+06	3	0.0106	0.359124	0.4931	MQ	q	I
735	4104_ML_FinalNorm	AR-22Y-0000DHT	O75907	DGAT1	Diacylglycerol O-acyltransferase 1 (EC 2.3.1.20) (ACAT-related gene product 1) (Acyl-CoA retinol O-fatty-acyltransferase) (ARAT) (Retinol O-fatty-acyltransferase) (EC 2.3.1.76) (Diglyceride acyltransferase)	0	1.8E+07|8.9E+06|1.1E+07	3.74053e+07	1.24684e+07	3	4.0E+05|1.7E+06|1.7E+06	3.81589e+06	1.27196e+06	3	0.9366	9.8025	0.0038	MQ	q	I
736	4104_ML_FinalNorm	AR-22Y-0060DHT	O75907	DGAT1	Diacylglycerol O-acyltransferase 1 (EC 2.3.1.20) (ACAT-related gene product 1) (Acyl-CoA retinol O-fatty-acyltransferase) (ARAT) (Retinol O-fatty-acyltransferase) (EC 2.3.1.76) (Diglyceride acyltransferase)	0	2.0E+07|2.3E+07|2.6E+07	6.87319e+07	2.29106e+07	3	4.0E+05|1.7E+06|1.7E+06	3.81589e+06	1.27196e+06	3	0.9959	18.012	0.0002	MQ	q	I
737	4104_ML_FinalNorm	AR-WT-0000DHT	O75907	DGAT1	Diacylglycerol O-acyltransferase 1 (EC 2.3.1.20) (ACAT-related gene product 1) (Acyl-CoA retinol O-fatty-acyltransferase) (ARAT) (Retinol O-fatty-acyltransferase) (EC 2.3.1.76) (Diglyceride acyltransferase)	0	1.6E+06|9.7E+05|1.7E+06	4.31656e+06	1.43885e+06	3	4.0E+05|1.7E+06|1.7E+06	3.81589e+06	1.27196e+06	3	0.1904	1.13121	0.2218	MQ	q	I
738	4104_ML_FinalNorm	AR-WT-0060DHT	O75907	DGAT1	Diacylglycerol O-acyltransferase 1 (EC 2.3.1.20) (ACAT-related gene product 1) (Acyl-CoA retinol O-fatty-acyltransferase) (ARAT) (Retinol O-fatty-acyltransferase) (EC 2.3.1.76) (Diglyceride acyltransferase)	0	1.5E+06|1.0E+06|1.1E+06	3.58458e+06	1.19486e+06	3	4.0E+05|1.7E+06|1.7E+06	3.81589e+06	1.27196e+06	3	0.1667	0.939383	0.2317	MQ	q	I
739	4104_ML_FinalNorm	AR-22Y-0000DHT	O75915	ARL6IP5	PRA1 family protein 3 (ADP-ribosylation factor-like protein 6-interacting protein 5) (ARL-6-interacting protein 5) (Aip-5) (Cytoskeleton-related vitamin A-responsive protein) (Dermal papilla-derived protein 11) (GTRAP3-18) (Glutamate transporter EAAC1-interacting protein) (JM5) (Prenylated Rab acceptor protein 2) (Protein JWa) (Putative MAPK-activating protein PM27)	0.56433	NAN|4.9E+06|3.5E+06	8.46018e+06	4.23009e+06	3	9.1E+05|9.4E+05|1.3E+06	3.1925e+06	1.06417e+06	3	0.6667	3.97502	0.0404	MQ	q	I
740	4104_ML_FinalNorm	AR-22Y-0060DHT	O75915	ARL6IP5	PRA1 family protein 3 (ADP-ribosylation factor-like protein 6-interacting protein 5) (ARL-6-interacting protein 5) (Aip-5) (Cytoskeleton-related vitamin A-responsive protein) (Dermal papilla-derived protein 11) (GTRAP3-18) (Glutamate transporter EAAC1-interacting protein) (JM5) (Prenylated Rab acceptor protein 2) (Protein JWa) (Putative MAPK-activating protein PM27)	0.56433	3.9E+06|4.6E+06|NAN	8.51752e+06	4.25876e+06	3	9.1E+05|9.4E+05|1.3E+06	3.1925e+06	1.06417e+06	3	0.6667	4.00196	0.0404	MQ	q	I
741	4104_ML_FinalNorm	AR-WT-0000DHT	O75915	ARL6IP5	PRA1 family protein 3 (ADP-ribosylation factor-like protein 6-interacting protein 5) (ARL-6-interacting protein 5) (Aip-5) (Cytoskeleton-related vitamin A-responsive protein) (Dermal papilla-derived protein 11) (GTRAP3-18) (Glutamate transporter EAAC1-interacting protein) (JM5) (Prenylated Rab acceptor protein 2) (Protein JWa) (Putative MAPK-activating protein PM27)	0.56433	1.1E+06|1.8E+06|1.6E+06	4.56393e+06	1.52131e+06	3	9.1E+05|9.4E+05|1.3E+06	3.1925e+06	1.06417e+06	3	0.3633	1.42958	0.1298	MQ	q	I
742	4104_ML_FinalNorm	AR-WT-0060DHT	O75915	ARL6IP5	PRA1 family protein 3 (ADP-ribosylation factor-like protein 6-interacting protein 5) (ARL-6-interacting protein 5) (Aip-5) (Cytoskeleton-related vitamin A-responsive protein) (Dermal papilla-derived protein 11) (GTRAP3-18) (Glutamate transporter EAAC1-interacting protein) (JM5) (Prenylated Rab acceptor protein 2) (Protein JWa) (Putative MAPK-activating protein PM27)	0.56433	1.6E+06|1.7E+06|NAN	3.26708e+06	1.63354e+06	3	9.1E+05|9.4E+05|1.3E+06	3.1925e+06	1.06417e+06	3	0.2626	1.53504	0.1948	MQ	q	I
743	4104_ML_FinalNorm	AR-WT-0060DHT	O75925	PIAS1	E3 SUMO-protein ligase PIAS1 (EC 2.3.2.-) (DEAD/H box-binding protein 1) (E3 SUMO-protein transferase PIAS1) (Gu-binding protein) (GBP) (Protein inhibitor of activated STAT protein 1) (RNA helicase II-binding protein)	0.308233	2.6E+07|3.0E+07|2.7E+07	8.28346e+07	2.76115e+07	3	6.6E+03|7.9E+03|9.0E+03	23443.9	7814.64	3	1	3533.31	0	MQ	q	I
744	4104_ML_FinalNorm	AR-WT-0060DHT	O75928	PIAS2	E3 SUMO-protein ligase PIAS2 (EC 2.3.2.-) (Androgen receptor-interacting protein 3) (ARIP3) (DAB2-interacting protein) (DIP) (E3 SUMO-protein transferase PIAS2) (Msx-interacting zinc finger protein) (Miz1) (PIAS-NY protein) (Protein inhibitor of activated STAT x) (Protein inhibitor of activated STAT2)	0.308233	3.0E+07|3.2E+07|3.1E+07	9.27342e+07	3.09114e+07	3	5.3E+03|7.7E+03|9.3E+03	22407.9	7469.3	3	1	4138.46	0	MQ	q	I
745	4104_ML_FinalNorm	AR-22Y-0060DHT	O75934	BCAS2	Pre-mRNA-splicing factor SPF27 (Breast carcinoma-amplified sequence 2) (DNA amplified in mammary carcinoma 1 protein) (Spliceosome-associated protein SPF 27)	0.860443	2.7E+06|2.8E+06|NAN	5.49941e+06	2.7497e+06	3	1.2E+07|1.5E+07|1.5E+07	4.16699e+07	1.389e+07	3	0.0002	0.197963	0.6234	MQ	q	I
746	4104_ML_FinalNorm	AR-WT-0000DHT	O75934	BCAS2	Pre-mRNA-splicing factor SPF27 (Breast carcinoma-amplified sequence 2) (DNA amplified in mammary carcinoma 1 protein) (Spliceosome-associated protein SPF 27)	0.860443	3.0E+06|2.6E+06|5.1E+06	1.06884e+07	3.5628e+06	3	1.2E+07|1.5E+07|1.5E+07	4.16699e+07	1.389e+07	3	0.001	0.256502	0.6034	MQ	q	I
747	4104_ML_FinalNorm	AR-WT-0060DHT	O75934	BCAS2	Pre-mRNA-splicing factor SPF27 (Breast carcinoma-amplified sequence 2) (DNA amplified in mammary carcinoma 1 protein) (Spliceosome-associated protein SPF 27)	0.860443	2.5E+06|3.0E+06|NAN	5.42104e+06	2.71052e+06	3	1.2E+07|1.5E+07|1.5E+07	4.16699e+07	1.389e+07	3	0.0002	0.195142	0.6234	MQ	q	I
748	4104_ML_FinalNorm	AR-22Y-0000DHT	O75955	FLOT1	Flotillin-1	0.786935	2.7E+07|5.0E+07|5.5E+07	1.32719e+08	4.42397e+07	3	7.6E+06|4.3E+06|8.0E+06	1.99383e+07	6.64608e+06	3	0.9998	6.6565	0	MQ	q	I
749	4104_ML_FinalNorm	AR-22Y-0060DHT	O75955	FLOT1	Flotillin-1	0.786935	4.7E+07|5.1E+07|5.5E+07	1.52534e+08	5.08448e+07	3	7.6E+06|4.3E+06|8.0E+06	1.99383e+07	6.64608e+06	3	1	7.65033	0	MQ	q	I
750	4104_ML_FinalNorm	AR-WT-0000DHT	O75955	FLOT1	Flotillin-1	0.786935	4.1E+06|5.2E+06|6.5E+06	1.57994e+07	5.26646e+06	3	7.6E+06|4.3E+06|8.0E+06	1.99383e+07	6.64608e+06	3	0.0614	0.792416	0.3026	MQ	q	I
751	4104_ML_FinalNorm	AR-WT-0060DHT	O75955	FLOT1	Flotillin-1	0.786935	5.4E+06|4.2E+06|7.1E+06	1.66892e+07	5.56308e+06	3	7.6E+06|4.3E+06|8.0E+06	1.99383e+07	6.64608e+06	3	0.065	0.837046	0.2976	MQ	q	I
752	4104_ML_FinalNorm	AR-22Y-0000DHT	O76021	RSL1D1	Ribosomal L1 domain-containing protein 1 (CATX-11) (Cellular senescence-inhibited gene protein) (Protein PBK1)	0.935638	3.1E+07|4.3E+07|4.7E+07	1.21055e+08	4.03516e+07	3	2.8E+07|2.5E+07|3.1E+07	8.36193e+07	2.78731e+07	3	0.5498	1.44769	0.0857	MQ	q	I
753	4104_ML_FinalNorm	AR-22Y-0060DHT	O76021	RSL1D1	Ribosomal L1 domain-containing protein 1 (CATX-11) (Cellular senescence-inhibited gene protein) (Protein PBK1)	0.935638	3.1E+07|3.8E+07|1.9E+07	8.87905e+07	2.95968e+07	3	2.8E+07|2.5E+07|3.1E+07	8.36193e+07	2.78731e+07	3	0.1043	1.06184	0.2626	MQ	q	I
754	4104_ML_FinalNorm	AR-WT-0000DHT	O76021	RSL1D1	Ribosomal L1 domain-containing protein 1 (CATX-11) (Cellular senescence-inhibited gene protein) (Protein PBK1)	0.935638	NAN|4.1E+05|1.5E+06	1.90199e+06	950997	3	2.8E+07|2.5E+07|3.1E+07	8.36193e+07	2.78731e+07	3	0.0017	0.0341188	0.5923	MQ	q	I
755	4104_ML_FinalNorm	AR-22Y-0000DHT	O76041	NEBL	Nebulette (Actin-binding Z-disk protein)	0.454273	2.2E+06|7.0E+06|1.8E+07	2.68725e+07	8.95749e+06	3	5.7E+05|4.6E+05|1.3E+06	2.33759e+06	779196	3	0.8295	11.4958	0.0117	MQ	q	I
756	4104_ML_FinalNorm	AR-22Y-0060DHT	O76041	NEBL	Nebulette (Actin-binding Z-disk protein)	0.454273	9.2E+06|NAN|1.1E+07	2.05193e+07	1.02597e+07	3	5.7E+05|4.6E+05|1.3E+06	2.33759e+06	779196	3	0.6667	13.167	0.0404	MQ	q	I
757	4104_ML_FinalNorm	AR-WT-0000DHT	O76041	NEBL	Nebulette (Actin-binding Z-disk protein)	0.454273	9.8E+06|5.4E+06|1.1E+07	2.64165e+07	8.80549e+06	3	5.7E+05|4.6E+05|1.3E+06	2.33759e+06	779196	3	0.9989	11.3007	0	MQ	q	I
758	4104_ML_FinalNorm	AR-WT-0060DHT	O76041	NEBL	Nebulette (Actin-binding Z-disk protein)	0.454273	9.3E+06|1.1E+07|9.8E+06	2.96123e+07	9.87076e+06	3	5.7E+05|4.6E+05|1.3E+06	2.33759e+06	779196	3	1	12.6679	0	MQ	q	I
759	4104_ML_FinalNorm	AR-22Y-0000DHT	O76062	TM7SF2	Delta(14)-sterol reductase TM7SF2 (Delta-14-SR) (EC 1.3.1.70) (3-beta-hydroxysterol Delta (14)-reductase) (Another new gene 1 protein) (C-14 sterol reductase) (C14SR) (Putative sterol reductase SR-1) (Sterol C14-reductase) (Transmembrane 7 superfamily member 2)	0.308233	NAN|6.4E+06|6.6E+06	1.29532e+07	6.47658e+06	3	4.0E+03|9.1E+03|1.1E+04	23799.5	7933.16	3	0.6667	816.394	0.0404	MQ	q	I
760	4104_ML_FinalNorm	AR-22Y-0060DHT	O76062	TM7SF2	Delta(14)-sterol reductase TM7SF2 (Delta-14-SR) (EC 1.3.1.70) (3-beta-hydroxysterol Delta (14)-reductase) (Another new gene 1 protein) (C-14 sterol reductase) (C14SR) (Putative sterol reductase SR-1) (Sterol C14-reductase) (Transmembrane 7 superfamily member 2)	0.308233	1.6E+07|1.5E+07|1.7E+07	4.7628e+07	1.5876e+07	3	4.0E+03|9.1E+03|1.1E+04	23799.5	7933.16	3	1	2001.22	0	MQ	q	I
761	4104_ML_FinalNorm	AR-WT-0000DHT	O76062	TM7SF2	Delta(14)-sterol reductase TM7SF2 (Delta-14-SR) (EC 1.3.1.70) (3-beta-hydroxysterol Delta (14)-reductase) (Another new gene 1 protein) (C-14 sterol reductase) (C14SR) (Putative sterol reductase SR-1) (Sterol C14-reductase) (Transmembrane 7 superfamily member 2)	0.308233	2.0E+06|1.9E+06|1.6E+06	5.48545e+06	1.82848e+06	3	4.0E+03|9.1E+03|1.1E+04	23799.5	7933.16	3	1	230.486	0	MQ	q	I
762	4104_ML_FinalNorm	AR-WT-0060DHT	O76062	TM7SF2	Delta(14)-sterol reductase TM7SF2 (Delta-14-SR) (EC 1.3.1.70) (3-beta-hydroxysterol Delta (14)-reductase) (Another new gene 1 protein) (C-14 sterol reductase) (C14SR) (Putative sterol reductase SR-1) (Sterol C14-reductase) (Transmembrane 7 superfamily member 2)	0.308233	2.2E+06|3.1E+06|NAN	5.27358e+06	2.63679e+06	3	4.0E+03|9.1E+03|1.1E+04	23799.5	7933.16	3	0.6667	332.376	0.0404	MQ	q	I
763	4104_ML_FinalNorm	AR-22Y-0000DHT	O76094	SRP72	Signal recognition particle subunit SRP72 (SRP72) (Signal recognition particle 72 kDa protein)	0.881986	2.9E+07|3.1E+07|3.8E+07	9.78854e+07	3.26285e+07	3	2.1E+07|2.4E+07|2.5E+07	7.10687e+07	2.36896e+07	3	0.3565	1.37734	0.1336	MQ	q	I
764	4104_ML_FinalNorm	AR-22Y-0060DHT	O76094	SRP72	Signal recognition particle subunit SRP72 (SRP72) (Signal recognition particle 72 kDa protein)	0.881986	9.0E+06|1.1E+07|2.4E+07	4.39865e+07	1.46622e+07	3	2.1E+07|2.4E+07|2.5E+07	7.10687e+07	2.36896e+07	3	0.0242	0.618929	0.4024	MQ	q	I
765	4104_ML_FinalNorm	AR-WT-0000DHT	O76094	SRP72	Signal recognition particle subunit SRP72 (SRP72) (Signal recognition particle 72 kDa protein)	0.881986	2.6E+06|2.2E+06|8.0E+05	5.54829e+06	1.84943e+06	3	2.1E+07|2.4E+07|2.5E+07	7.10687e+07	2.36896e+07	3	0.0024	0.0780694	0.5812	MQ	q	I
766	4104_ML_FinalNorm	AR-WT-0060DHT	O76094	SRP72	Signal recognition particle subunit SRP72 (SRP72) (Signal recognition particle 72 kDa protein)	0.881986	3.3E+06|1.7E+06|1.8E+06	6.72704e+06	2.24235e+06	3	2.1E+07|2.4E+07|2.5E+07	7.10687e+07	2.36896e+07	3	0.0031	0.0946555	0.5692	MQ	q	I
767	4104_ML_FinalNorm	AR-22Y-0000DHT	O94776	MTA2	Metastasis-associated protein MTA2 (Metastasis-associated 1-like 1) (MTA1-L1 protein) (p53 target protein in deacetylase complex)	0.907175	5.1E+06|5.3E+06|7.4E+06	1.78246e+07	5.94154e+06	3	1.9E+07|2.1E+07|2.5E+07	6.45783e+07	2.15261e+07	3	0.001	0.276015	0.6034	MQ	q	I
768	4104_ML_FinalNorm	AR-22Y-0060DHT	O94776	MTA2	Metastasis-associated protein MTA2 (Metastasis-associated 1-like 1) (MTA1-L1 protein) (p53 target protein in deacetylase complex)	0.907175	2.8E+06|4.1E+06|1.2E+06	8.13083e+06	2.71028e+06	3	1.9E+07|2.1E+07|2.5E+07	6.45783e+07	2.15261e+07	3	0.0001	0.125906	0.6286	MQ	q	I
769	4104_ML_FinalNorm	AR-WT-0000DHT	O94776	MTA2	Metastasis-associated protein MTA2 (Metastasis-associated 1-like 1) (MTA1-L1 protein) (p53 target protein in deacetylase complex)	0.907175	5.5E+05|1.4E+06|2.6E+06	4.58984e+06	1.52995e+06	3	1.9E+07|2.1E+07|2.5E+07	6.45783e+07	2.15261e+07	3	0	0.071074	0.6339	MQ	q	I
770	4104_ML_FinalNorm	AR-WT-0060DHT	O94776	MTA2	Metastasis-associated protein MTA2 (Metastasis-associated 1-like 1) (MTA1-L1 protein) (p53 target protein in deacetylase complex)	0.907175	3.1E+06|2.5E+06|2.9E+06	8.37485e+06	2.79162e+06	3	1.9E+07|2.1E+07|2.5E+07	6.45783e+07	2.15261e+07	3	0	0.129685	0.6339	MQ	q	I
771	4104_ML_FinalNorm	AR-22Y-0000DHT	O94808	GFPT2	Glutamine--fructose-6-phosphate aminotransferase [isomerizing] 2 (EC 2.6.1.16) (D-fructose-6-phosphate amidotransferase 2) (Glutamine:fructose-6-phosphate amidotransferase 2) (GFAT 2) (GFAT2) (Hexosephosphate aminotransferase 2)	0.52965	3.7E+06|NAN|NAN	3.69488e+06	3.69488e+06	3	7.0E+03|6.4E+03|5.8E+03	19214	6404.68	3	0.3333	576.902	0.1476	MQ	q	I
772	4104_ML_FinalNorm	AR-22Y-0060DHT	O94808	GFPT2	Glutamine--fructose-6-phosphate aminotransferase [isomerizing] 2 (EC 2.6.1.16) (D-fructose-6-phosphate amidotransferase 2) (Glutamine:fructose-6-phosphate amidotransferase 2) (GFAT 2) (GFAT2) (Hexosephosphate aminotransferase 2)	0.52965	3.7E+06|3.4E+06|3.3E+06	1.04135e+07	3.47117e+06	3	7.0E+03|6.4E+03|5.8E+03	19214	6404.68	3	1	541.974	0	MQ	q	I
773	4104_ML_FinalNorm	AR-WT-0000DHT	O94808	GFPT2	Glutamine--fructose-6-phosphate aminotransferase [isomerizing] 2 (EC 2.6.1.16) (D-fructose-6-phosphate amidotransferase 2) (Glutamine:fructose-6-phosphate amidotransferase 2) (GFAT 2) (GFAT2) (Hexosephosphate aminotransferase 2)	0.52965	1.4E+06|NAN|1.5E+06	2.87956e+06	1.43978e+06	3	7.0E+03|6.4E+03|5.8E+03	19214	6404.68	3	0.6667	224.801	0.0404	MQ	q	I
774	4104_ML_FinalNorm	AR-WT-0060DHT	O94808	GFPT2	Glutamine--fructose-6-phosphate aminotransferase [isomerizing] 2 (EC 2.6.1.16) (D-fructose-6-phosphate amidotransferase 2) (Glutamine:fructose-6-phosphate amidotransferase 2) (GFAT 2) (GFAT2) (Hexosephosphate aminotransferase 2)	0.52965	NAN|1.5E+06|1.3E+06	2.78039e+06	1.3902e+06	3	7.0E+03|6.4E+03|5.8E+03	19214	6404.68	3	0.6667	217.059	0.0404	MQ	q	I
775	4104_ML_FinalNorm	AR-22Y-0000DHT	O94832	MYO1D	Unconventional myosin-Id	0.873607	3.5E+07|2.5E+07|2.3E+07	8.24621e+07	2.74874e+07	3	1.2E+08|2.6E+08|2.3E+08	6.08123e+08	2.02708e+08	3	0.0297	0.135601	0.3749	MQ	q	I
776	4104_ML_FinalNorm	AR-22Y-0060DHT	O94832	MYO1D	Unconventional myosin-Id	0.873607	2.3E+09|4.2E+07|8.1E+06	2.37548e+09	7.91827e+08	3	1.2E+08|2.6E+08|2.3E+08	6.08123e+08	2.02708e+08	3	0.35	3.90625	0.1369	MQ	q	I
777	4104_ML_FinalNorm	AR-WT-0000DHT	O94832	MYO1D	Unconventional myosin-Id	0.873607	4.9E+08|4.2E+08|4.6E+08	1.36485e+09	4.54951e+08	3	1.2E+08|2.6E+08|2.3E+08	6.08123e+08	2.02708e+08	3	0.4801	2.24437	0.1008	MQ	q	I
778	4104_ML_FinalNorm	AR-WT-0060DHT	O94832	MYO1D	Unconventional myosin-Id	0.873607	5.2E+08|1.3E+07|6.2E+08	1.14764e+09	3.82546e+08	3	1.2E+08|2.6E+08|2.3E+08	6.08123e+08	2.02708e+08	3	0.5112	1.88718	0.0943	MQ	q	I
779	4104_ML_FinalNorm	AR-WT-0000DHT	O94842	TOX4	TOX high mobility group box family member 4 (Epidermal Langerhans cell protein LCP1)	0.887424	5.4E+05|NAN|1.4E+06	1.92984e+06	964921	3	3.1E+06|4.1E+06|2.6E+06	9.7621e+06	3.25403e+06	3	0.002	0.296531	0.5878	MQ	q	I
780	4104_ML_FinalNorm	AR-WT-0060DHT	O94842	TOX4	TOX high mobility group box family member 4 (Epidermal Langerhans cell protein LCP1)	0.887424	1.1E+06|NAN|NAN	1.10538e+06	1.10538e+06	3	3.1E+06|4.1E+06|2.6E+06	9.7621e+06	3.25403e+06	3	0.001	0.339695	0.6034	MQ	q	I
781	4104_ML_FinalNorm	AR-22Y-0060DHT	O94880	PHF14	PHD finger protein 14	0.628052	NAN|NAN|4.0E+06	3.9855e+06	3.9855e+06	3	8.1E+05|4.0E+05|1.2E+06	2.37902e+06	793006	3	0.3221	5.02581	0.1772	MQ	q	I
782	4104_ML_FinalNorm	AR-WT-0000DHT	O94880	PHF14	PHD finger protein 14	0.628052	NAN|2.5E+05|NAN	254748	254748	3	8.1E+05|4.0E+05|1.2E+06	2.37902e+06	793006	3	0.0167	0.321243	0.448	MQ	q	I
783	4104_ML_FinalNorm	AR-WT-0060DHT	O94880	PHF14	PHD finger protein 14	0.628052	1.1E+07|3.4E+06|7.2E+06	2.129e+07	7.09668e+06	3	8.1E+05|4.0E+05|1.2E+06	2.37902e+06	793006	3	0.9734	8.94909	0.0014	MQ	q	I
784	4104_ML_FinalNorm	AR-WT-0060DHT	O94906	PRPF6	Pre-mRNA-processing factor 6 (Androgen receptor N-terminal domain-transactivating protein 1) (ANT-1) (PRP6 homolog) (U5 snRNP-associated 102 kDa protein) (U5-102 kDa protein)	0.93101	NAN|1.1E+06|9.5E+05	2.08568e+06	1.04284e+06	3	4.7E+06|7.9E+06|5.3E+06	1.79675e+07	5.98917e+06	3	0.0002	0.174121	0.6234	MQ	q	I
785	4104_ML_FinalNorm	AR-22Y-0000DHT	O94913	PCF11	Pre-mRNA cleavage complex 2 protein Pcf11 (Pre-mRNA cleavage complex II protein Pcf11)	0.784419	2.9E+06|1.7E+07|1.9E+07	3.90151e+07	1.3005e+07	3	5.4E+06|4.7E+06|7.0E+06	1.71175e+07	5.70585e+06	3	0.6772	2.27925	0.0357	MQ	q	I
786	4104_ML_FinalNorm	AR-22Y-0060DHT	O94913	PCF11	Pre-mRNA cleavage complex 2 protein Pcf11 (Pre-mRNA cleavage complex II protein Pcf11)	0.784419	1.8E+08|1.6E+08|1.6E+08	4.94164e+08	1.64721e+08	3	5.4E+06|4.7E+06|7.0E+06	1.71175e+07	5.70585e+06	3	1	28.8689	0	MQ	q	I
787	4104_ML_FinalNorm	AR-WT-0000DHT	O94913	PCF11	Pre-mRNA cleavage complex 2 protein Pcf11 (Pre-mRNA cleavage complex II protein Pcf11)	0.784419	1.6E+06|1.5E+06|2.9E+06	6.00206e+06	2.00069e+06	3	5.4E+06|4.7E+06|7.0E+06	1.71175e+07	5.70585e+06	3	0.026	0.350638	0.3929	MQ	q	I
788	4104_ML_FinalNorm	AR-WT-0060DHT	O94913	PCF11	Pre-mRNA cleavage complex 2 protein Pcf11 (Pre-mRNA cleavage complex II protein Pcf11)	0.784419	1.3E+07|1.2E+06|2.8E+06	1.68835e+07	5.62783e+06	3	5.4E+06|4.7E+06|7.0E+06	1.71175e+07	5.70585e+06	3	0.3486	0.986327	0.1376	MQ	q	I
789	4104_ML_FinalNorm	AR-WT-0000DHT	O94915	FRYL	Protein furry homolog-like (ALL1-fused gene from chromosome 4p12 protein)	0.733106	6.3E+05|1.5E+06|7.6E+05	2.93917e+06	979723	3	2.2E+06|1.7E+06|1.5E+06	5.31507e+06	1.77169e+06	3	0.0114	0.552988	0.4874	MQ	q	I
790	4104_ML_FinalNorm	AR-WT-0000DHT	O94916	NFAT5	Nuclear factor of activated T-cells 5 (NF-AT5) (T-cell transcription factor NFAT5) (Tonicity-responsive enhancer-binding protein) (TonE-binding protein) (TonEBP)	0.488858	9.7E+05|3.9E+06|3.1E+06	8.04754e+06	2.68251e+06	3	6.9E+05|2.7E+06|1.9E+06	5.35239e+06	1.78413e+06	3	0.2918	1.50354	0.1859	MQ	q	I
791	4104_ML_FinalNorm	AR-WT-0060DHT	O94916	NFAT5	Nuclear factor of activated T-cells 5 (NF-AT5) (T-cell transcription factor NFAT5) (Tonicity-responsive enhancer-binding protein) (TonE-binding protein) (TonEBP)	0.488858	3.2E+06|1.6E+06|4.0E+06	8.87254e+06	2.95751e+06	3	6.9E+05|2.7E+06|1.9E+06	5.35239e+06	1.78413e+06	3	0.3263	1.65768	0.1763	MQ	q	I
792	4104_ML_FinalNorm	AR-22Y-0000DHT	O94925	GLS	Glutaminase kidney isoform, mitochondrial (GLS) (EC 3.5.1.2) (K-glutaminase) (L-glutamine amidohydrolase) [Cleaved into: Glutaminase kidney isoform, mitochondrial 68 kDa chain; Glutaminase kidney isoform, mitochondrial 65 kDa chain]	0.727271	3.3E+06|9.7E+06|1.1E+07	2.3972e+07	7.99067e+06	3	7.8E+06|1.1E+07|9.5E+06	2.84013e+07	9.4671e+06	3	0.0302	0.844046	0.3723	MQ	q	I
793	4104_ML_FinalNorm	AR-22Y-0060DHT	O94925	GLS	Glutaminase kidney isoform, mitochondrial (GLS) (EC 3.5.1.2) (K-glutaminase) (L-glutamine amidohydrolase) [Cleaved into: Glutaminase kidney isoform, mitochondrial 68 kDa chain; Glutaminase kidney isoform, mitochondrial 65 kDa chain]	0.727271	5.5E+06|7.6E+06|5.1E+06	1.81582e+07	6.05273e+06	3	7.8E+06|1.1E+07|9.5E+06	2.84013e+07	9.4671e+06	3	0.0126	0.639344	0.478	MQ	q	I
794	4104_ML_FinalNorm	AR-WT-0000DHT	O94925	GLS	Glutaminase kidney isoform, mitochondrial (GLS) (EC 3.5.1.2) (K-glutaminase) (L-glutamine amidohydrolase) [Cleaved into: Glutaminase kidney isoform, mitochondrial 68 kDa chain; Glutaminase kidney isoform, mitochondrial 65 kDa chain]	0.727271	2.6E+06|1.6E+06|2.6E+06	6.93902e+06	2.31301e+06	3	7.8E+06|1.1E+07|9.5E+06	2.84013e+07	9.4671e+06	3	0.0008	0.24432	0.6074	MQ	q	I
795	4104_ML_FinalNorm	AR-WT-0060DHT	O94925	GLS	Glutaminase kidney isoform, mitochondrial (GLS) (EC 3.5.1.2) (K-glutaminase) (L-glutamine amidohydrolase) [Cleaved into: Glutaminase kidney isoform, mitochondrial 68 kDa chain; Glutaminase kidney isoform, mitochondrial 65 kDa chain]	0.727271	1.6E+06|3.0E+06|2.6E+06	7.28116e+06	2.42705e+06	3	7.8E+06|1.1E+07|9.5E+06	2.84013e+07	9.4671e+06	3	0.001	0.256367	0.6034	MQ	q	I
796	4104_ML_FinalNorm	AR-22Y-0000DHT	O94929	ABLIM3	Actin-binding LIM protein 3 (abLIM-3) (Actin-binding LIM protein family member 3)	0.353741	7.8E+06|4.6E+06|4.8E+06	1.72453e+07	5.74842e+06	3	3.3E+06|3.2E+06|4.7E+06	1.11713e+07	3.72376e+06	3	0.3734	1.54372	0.1254	MQ	q	I
797	4104_ML_FinalNorm	AR-22Y-0060DHT	O94929	ABLIM3	Actin-binding LIM protein 3 (abLIM-3) (Actin-binding LIM protein family member 3)	0.353741	1.1E+08|1.4E+08|1.1E+08	3.68444e+08	1.22815e+08	3	3.3E+06|3.2E+06|4.7E+06	1.11713e+07	3.72376e+06	3	1	32.9814	0	MQ	q	I
798	4104_ML_FinalNorm	AR-WT-0000DHT	O94929	ABLIM3	Actin-binding LIM protein 3 (abLIM-3) (Actin-binding LIM protein family member 3)	0.353741	1.6E+07|1.6E+07|1.7E+07	4.8947e+07	1.63157e+07	3	3.3E+06|3.2E+06|4.7E+06	1.11713e+07	3.72376e+06	3	1	4.38151	0	MQ	q	I
799	4104_ML_FinalNorm	AR-WT-0060DHT	O94929	ABLIM3	Actin-binding LIM protein 3 (abLIM-3) (Actin-binding LIM protein family member 3)	0.353741	1.9E+07|2.0E+07|3.1E+07	6.93293e+07	2.31098e+07	3	3.3E+06|3.2E+06|4.7E+06	1.11713e+07	3.72376e+06	3	1	6.20603	0	MQ	q	I
800	4104_ML_FinalNorm	AR-WT-0000DHT	O94973	AP2A2	AP-2 complex subunit alpha-2 (100 kDa coated vesicle protein C) (Adaptor protein complex AP-2 subunit alpha-2) (Adaptor-related protein complex 2 subunit alpha-2) (Alpha-adaptin C) (Alpha2-adaptin) (Clathrin assembly protein complex 2 alpha-C large chain) (Huntingtin yeast partner J) (Huntingtin-interacting protein 9) (HIP-9) (Huntingtin-interacting protein J) (Plasma membrane adaptor HA2/AP2 ada…	0.741344	9.6E+05|1.6E+06|1.1E+06	3.62994e+06	1.20998e+06	3	1.0E+07|7.8E+06|1.0E+07	2.82709e+07	9.42363e+06	3	0.0001	0.128399	0.6286	MQ	q	I
801	4104_ML_FinalNorm	AR-WT-0060DHT	O94973	AP2A2	AP-2 complex subunit alpha-2 (100 kDa coated vesicle protein C) (Adaptor protein complex AP-2 subunit alpha-2) (Adaptor-related protein complex 2 subunit alpha-2) (Alpha-adaptin C) (Alpha2-adaptin) (Clathrin assembly protein complex 2 alpha-C large chain) (Huntingtin yeast partner J) (Huntingtin-interacting protein 9) (HIP-9) (Huntingtin-interacting protein J) (Plasma membrane adaptor HA2/AP2 ada…	0.741344	2.4E+06|6.0E+05|8.1E+05	3.83255e+06	1.27752e+06	3	1.0E+07|7.8E+06|1.0E+07	2.82709e+07	9.42363e+06	3	0.0002	0.135565	0.6234	MQ	q	I
802	4104_ML_FinalNorm	AR-22Y-0000DHT	O94979	SEC31A	Protein transport protein Sec31A (ABP125) (ABP130) (SEC31-like protein 1) (SEC31-related protein A) (Web1-like protein)	0.796455	7.3E+06|8.9E+06|1.9E+06	1.8109e+07	6.03632e+06	3	5.7E+06|7.0E+06|6.4E+06	1.90097e+07	6.33656e+06	3	0.1341	0.952618	0.2476	MQ	q	I
803	4104_ML_FinalNorm	AR-22Y-0060DHT	O94979	SEC31A	Protein transport protein Sec31A (ABP125) (ABP130) (SEC31-like protein 1) (SEC31-related protein A) (Web1-like protein)	0.796455	NAN|5.6E+06|4.2E+06	9.80706e+06	4.90353e+06	3	5.7E+06|7.0E+06|6.4E+06	1.90097e+07	6.33656e+06	3	0.011	0.773847	0.4902	MQ	q	I
804	4104_ML_FinalNorm	AR-WT-0000DHT	O94979	SEC31A	Protein transport protein Sec31A (ABP125) (ABP130) (SEC31-like protein 1) (SEC31-related protein A) (Web1-like protein)	0.796455	4.9E+06|4.3E+06|5.4E+06	1.46014e+07	4.86714e+06	3	5.7E+06|7.0E+06|6.4E+06	1.90097e+07	6.33656e+06	3	0.0161	0.768104	0.4521	MQ	q	I
805	4104_ML_FinalNorm	AR-WT-0060DHT	O94979	SEC31A	Protein transport protein Sec31A (ABP125) (ABP130) (SEC31-like protein 1) (SEC31-related protein A) (Web1-like protein)	0.796455	4.0E+06|3.5E+06|4.4E+06	1.19085e+07	3.9695e+06	3	5.7E+06|7.0E+06|6.4E+06	1.90097e+07	6.33656e+06	3	0.0102	0.626444	0.4962	MQ	q	I
806	4104_ML_FinalNorm	AR-WT-0000DHT	O94986	CEP152	Centrosomal protein of 152 kDa (Cep152)	0.582286	1.9E+06|2.5E+06|7.2E+06	1.16502e+07	3.88342e+06	3	7.2E+03|8.5E+03|8.3E+03	24046.1	8015.35	3	1	484.497	0	MQ	q	I
807	4104_ML_FinalNorm	AR-WT-0060DHT	O94986	CEP152	Centrosomal protein of 152 kDa (Cep152)	0.582286	1.3E+06|3.6E+05|NAN	1.68431e+06	842155	3	7.2E+03|8.5E+03|8.3E+03	24046.1	8015.35	3	0.6667	105.068	0.0404	MQ	q	I
808	4104_ML_FinalNorm	AR-22Y-0060DHT	O94992	HEXIM1	Protein HEXIM1 (Cardiac lineage protein 1) (Estrogen down-regulated gene 1 protein) (Hexamethylene bis-acetamide-inducible protein 1) (Menage a quatre protein 1)	0.712011	NAN|NAN|2.3E+06	2.26829e+06	2.26829e+06	3	4.8E+06|5.9E+06|4.2E+06	1.4928e+07	4.97601e+06	3	0.0017	0.455845	0.5923	MQ	q	I
809	4104_ML_FinalNorm	AR-WT-0000DHT	O94992	HEXIM1	Protein HEXIM1 (Cardiac lineage protein 1) (Estrogen down-regulated gene 1 protein) (Hexamethylene bis-acetamide-inducible protein 1) (Menage a quatre protein 1)	0.712011	4.4E+06|3.5E+06|4.5E+06	1.24953e+07	4.1651e+06	3	4.8E+06|5.9E+06|4.2E+06	1.4928e+07	4.97601e+06	3	0.0215	0.837036	0.4183	MQ	q	I
810	4104_ML_FinalNorm	AR-WT-0060DHT	O94992	HEXIM1	Protein HEXIM1 (Cardiac lineage protein 1) (Estrogen down-regulated gene 1 protein) (Hexamethylene bis-acetamide-inducible protein 1) (Menage a quatre protein 1)	0.712011	5.4E+06|5.3E+06|3.9E+06	1.4617e+07	4.87234e+06	3	4.8E+06|5.9E+06|4.2E+06	1.4928e+07	4.97601e+06	3	0.0314	0.979165	0.3667	MQ	q	I
811	4104_ML_FinalNorm	AR-22Y-0000DHT	O95070	YIF1A	Protein YIF1A (54TMp) (YIP1-interacting factor homolog A)	0.421712	6.3E+06|NAN|2.2E+06	8.51412e+06	4.25706e+06	3	NAN|NAN|1.5E+05	154226	154226	3	0.6667	27.6027	0.0404	MQ	q	I
812	4104_ML_FinalNorm	AR-22Y-0060DHT	O95070	YIF1A	Protein YIF1A (54TMp) (YIP1-interacting factor homolog A)	0.421712	2.4E+07|1.4E+07|2.0E+07	5.88081e+07	1.96027e+07	3	NAN|NAN|1.5E+05	154226	154226	3	1	127.103	0	MQ	q	I
813	4104_ML_FinalNorm	AR-WT-0000DHT	O95070	YIF1A	Protein YIF1A (54TMp) (YIP1-interacting factor homolog A)	0.421712	6.2E+05|5.2E+05|3.6E+05	1.49588e+06	498626	3	NAN|NAN|1.5E+05	154226	154226	3	1	3.23307	0	MQ	q	I
814	4104_ML_FinalNorm	AR-WT-0060DHT	O95070	YIF1A	Protein YIF1A (54TMp) (YIP1-interacting factor homolog A)	0.421712	5.5E+05|5.5E+05|4.8E+05	1.57257e+06	524192	3	NAN|NAN|1.5E+05	154226	154226	3	1	3.39884	0	MQ	q	I
815	4104_ML_FinalNorm	AR-22Y-0000DHT	O95071	UBR5	E3 ubiquitin-protein ligase UBR5 (EC 2.3.2.26) (E3 ubiquitin-protein ligase, HECT domain-containing 1) (HECT-type E3 ubiquitin transferase UBR5) (Hyperplastic discs protein homolog) (hHYD) (Progestin-induced protein)	0.709404	3.3E+06|NAN|NAN	3.31875e+06	3.31875e+06	3	1.5E+07|1.6E+07|1.3E+07	4.38285e+07	1.46095e+07	3	0.0002	0.227164	0.6234	MQ	q	I
816	4104_ML_FinalNorm	AR-WT-0000DHT	O95071	UBR5	E3 ubiquitin-protein ligase UBR5 (EC 2.3.2.26) (E3 ubiquitin-protein ligase, HECT domain-containing 1) (HECT-type E3 ubiquitin transferase UBR5) (Hyperplastic discs protein homolog) (hHYD) (Progestin-induced protein)	0.709404	4.4E+06|5.6E+06|5.7E+06	1.57627e+07	5.25422e+06	3	1.5E+07|1.6E+07|1.3E+07	4.38285e+07	1.46095e+07	3	0.0023	0.359644	0.5825	MQ	q	I
817	4104_ML_FinalNorm	AR-WT-0060DHT	O95071	UBR5	E3 ubiquitin-protein ligase UBR5 (EC 2.3.2.26) (E3 ubiquitin-protein ligase, HECT domain-containing 1) (HECT-type E3 ubiquitin transferase UBR5) (Hyperplastic discs protein homolog) (hHYD) (Progestin-induced protein)	0.709404	6.5E+06|1.9E+06|2.9E+06	1.13758e+07	3.79193e+06	3	1.5E+07|1.6E+07|1.3E+07	4.38285e+07	1.46095e+07	3	0.0015	0.259552	0.5948	MQ	q	I
818	4104_ML_FinalNorm	AR-22Y-0000DHT	O95104	SCAF4	SR-related and CTD-associated factor 4 (CTD-binding SR-like protein RA4) (Splicing factor, arginine/serine-rich 15)	0	NAN|1.8E+06|6.8E+06	8.60632e+06	4.30316e+06	3	4.9E+06|6.0E+06|7.2E+06	1.80215e+07	6.00717e+06	3	0.0177	0.716337	0.4421	MQ	q	I
819	4104_ML_FinalNorm	AR-22Y-0060DHT	O95104	SCAF4	SR-related and CTD-associated factor 4 (CTD-binding SR-like protein RA4) (Splicing factor, arginine/serine-rich 15)	0	1.4E+06|4.2E+06|4.6E+06	1.01752e+07	3.39175e+06	3	4.9E+06|6.0E+06|7.2E+06	1.80215e+07	6.00717e+06	3	0.0122	0.564617	0.4813	MQ	q	I
820	4104_ML_FinalNorm	AR-WT-0000DHT	O95104	SCAF4	SR-related and CTD-associated factor 4 (CTD-binding SR-like protein RA4) (Splicing factor, arginine/serine-rich 15)	0	2.2E+06|8.8E+05|1.3E+06	4.3254e+06	1.4418e+06	3	4.9E+06|6.0E+06|7.2E+06	1.80215e+07	6.00717e+06	3	0.0011	0.240013	0.6013	MQ	q	I
821	4104_ML_FinalNorm	AR-WT-0060DHT	O95104	SCAF4	SR-related and CTD-associated factor 4 (CTD-binding SR-like protein RA4) (Splicing factor, arginine/serine-rich 15)	0	1.8E+06|1.6E+06|1.6E+06	5.05397e+06	1.68466e+06	3	4.9E+06|6.0E+06|7.2E+06	1.80215e+07	6.00717e+06	3	0.0012	0.280441	0.6	MQ	q	I
822	4104_ML_FinalNorm	AR-WT-0000DHT	O95163	ELP1	Elongator complex protein 1 (ELP1) (IkappaB kinase complex-associated protein) (IKK complex-associated protein) (p150)	0.815143	1.6E+07|1.7E+07|1.9E+07	5.21374e+07	1.73791e+07	3	3.6E+06|7.7E+06|6.1E+06	1.73216e+07	5.77386e+06	3	0.9452	3.00997	0.003	MQ	q	I
823	4104_ML_FinalNorm	AR-WT-0060DHT	O95163	ELP1	Elongator complex protein 1 (ELP1) (IkappaB kinase complex-associated protein) (IKK complex-associated protein) (p150)	0.815143	6.4E+06|1.1E+07|1.6E+07	3.33865e+07	1.11288e+07	3	3.6E+06|7.7E+06|6.1E+06	1.73216e+07	5.77386e+06	3	0.4846	1.92745	0.0998	MQ	q	I
824	4104_ML_FinalNorm	AR-22Y-0060DHT	O95197	RTN3	Reticulon-3 (Homolog of ASY protein) (HAP) (Neuroendocrine-specific protein-like 2) (NSP-like protein 2) (Neuroendocrine-specific protein-like II) (NSP-like protein II) (NSPLII)	0.599998	9.1E+06|9.1E+06|1.3E+07	3.08429e+07	1.0281e+07	3	5.7E+06|2.5E+06|1.8E+06	9.96183e+06	3.32061e+06	3	0.7107	3.09611	0.0272	MQ	q	I
825	4104_ML_FinalNorm	AR-WT-0000DHT	O95197	RTN3	Reticulon-3 (Homolog of ASY protein) (HAP) (Neuroendocrine-specific protein-like 2) (NSP-like protein 2) (Neuroendocrine-specific protein-like II) (NSP-like protein II) (NSPLII)	0.599998	NAN|1.3E+06|1.0E+07	1.16312e+07	5.8156e+06	3	5.7E+06|2.5E+06|1.8E+06	9.96183e+06	3.32061e+06	3	0.2585	1.75136	0.1967	MQ	q	I
826	4104_ML_FinalNorm	AR-WT-0060DHT	O95197	RTN3	Reticulon-3 (Homolog of ASY protein) (HAP) (Neuroendocrine-specific protein-like 2) (NSP-like protein 2) (Neuroendocrine-specific protein-like II) (NSP-like protein II) (NSPLII)	0.599998	1.5E+06|NAN|NAN	1.52535e+06	1.52535e+06	3	5.7E+06|2.5E+06|1.8E+06	9.96183e+06	3.32061e+06	3	0.0174	0.459359	0.4444	MQ	q	I
827	4104_ML_FinalNorm	AR-22Y-0000DHT	O95202	LETM1	Mitochondrial proton/calcium exchanger protein (Leucine zipper-EF-hand-containing transmembrane protein 1)	0.700515	1.4E+06|2.4E+06|5.2E+06	8.96017e+06	2.98672e+06	3	7.3E+06|5.7E+06|5.8E+06	1.8851e+07	6.28365e+06	3	0.0072	0.475317	0.5233	MQ	q	I
828	4104_ML_FinalNorm	AR-WT-0000DHT	O95202	LETM1	Mitochondrial proton/calcium exchanger protein (Leucine zipper-EF-hand-containing transmembrane protein 1)	0.700515	1.2E+06|1.1E+06|1.2E+06	3.4569e+06	1.1523e+06	3	7.3E+06|5.7E+06|5.8E+06	1.8851e+07	6.28365e+06	3	0.0002	0.183381	0.6234	MQ	q	I
829	4104_ML_FinalNorm	AR-WT-0000DHT	O95210	STBD1	Starch-binding domain-containing protein 1 (Genethonin-1) (Glycophagy cargo receptor STBD1)	0.62028	9.3E+05|1.8E+06|9.8E+05	3.72923e+06	1.24308e+06	3	1.9E+06|1.2E+06|2.4E+06	5.51767e+06	1.83922e+06	3	0.029	0.67587	0.3782	MQ	q	I
830	4104_ML_FinalNorm	AR-22Y-0000DHT	O95218	ZRANB2	Zinc finger Ran-binding domain-containing protein 2 (Zinc finger protein 265) (Zinc finger, splicing)	0.903698	NAN|3.1E+06|NAN	3.12459e+06	3.12459e+06	3	2.9E+06|8.5E+06|1.0E+07	2.1353e+07	7.11766e+06	3	0.0078	0.438992	0.5169	MQ	q	I
831	4104_ML_FinalNorm	AR-22Y-0060DHT	O95218	ZRANB2	Zinc finger Ran-binding domain-containing protein 2 (Zinc finger protein 265) (Zinc finger, splicing)	0.903698	NAN|NAN|1.7E+06	1.66365e+06	1.66365e+06	3	2.9E+06|8.5E+06|1.0E+07	2.1353e+07	7.11766e+06	3	0.0011	0.233736	0.6013	MQ	q	I
832	4104_ML_FinalNorm	AR-WT-0000DHT	O95218	ZRANB2	Zinc finger Ran-binding domain-containing protein 2 (Zinc finger protein 265) (Zinc finger, splicing)	0.903698	3.4E+06|4.4E+06|2.8E+06	1.06731e+07	3.5577e+06	3	2.9E+06|8.5E+06|1.0E+07	2.1353e+07	7.11766e+06	3	0.034	0.499842	0.3569	MQ	q	I
833	4104_ML_FinalNorm	AR-WT-0060DHT	O95218	ZRANB2	Zinc finger Ran-binding domain-containing protein 2 (Zinc finger protein 265) (Zinc finger, splicing)	0.903698	3.7E+06|4.3E+06|5.8E+06	1.38832e+07	4.62775e+06	3	2.9E+06|8.5E+06|1.0E+07	2.1353e+07	7.11766e+06	3	0.0601	0.650178	0.3053	MQ	q	I
834	4104_ML_FinalNorm	AR-WT-0000DHT	O95229	ZWINT	ZW10 interactor (ZW10-interacting protein 1) (Zwint-1)	0	2.2E+06|2.4E+06|1.4E+06	5.96937e+06	1.98979e+06	3	5.5E+03|8.6E+03|9.6E+03	23654.4	7884.79	3	1	252.358	0	MQ	q	I
835	4104_ML_FinalNorm	AR-WT-0060DHT	O95229	ZWINT	ZW10 interactor (ZW10-interacting protein 1) (Zwint-1)	0	7.4E+05|NAN|7.7E+05	1.51487e+06	757437	3	5.5E+03|8.6E+03|9.6E+03	23654.4	7884.79	3	0.6667	96.0631	0.0404	MQ	q	I
836	4104_ML_FinalNorm	AR-22Y-0000DHT	O95232	LUC7L3	Luc7-like protein 3 (Cisplatin resistance-associated-overexpressed protein) (Luc7A) (Okadaic acid-inducible phosphoprotein OA48-18) (cAMP regulatory element-associated protein 1) (CRE-associated protein 1) (CREAP-1)	0.951439	3.5E+07|3.3E+07|4.8E+07	1.16921e+08	3.89736e+07	3	1.9E+07|1.8E+07|1.9E+07	5.54443e+07	1.84814e+07	3	0.9949	2.1088	0.0002	MQ	q	I
837	4104_ML_FinalNorm	AR-22Y-0060DHT	O95232	LUC7L3	Luc7-like protein 3 (Cisplatin resistance-associated-overexpressed protein) (Luc7A) (Okadaic acid-inducible phosphoprotein OA48-18) (cAMP regulatory element-associated protein 1) (CRE-associated protein 1) (CREAP-1)	0.951439	2.2E+07|3.2E+07|2.0E+07	7.44743e+07	2.48248e+07	3	1.9E+07|1.8E+07|1.9E+07	5.54443e+07	1.84814e+07	3	0.3607	1.34323	0.1316	MQ	q	I
838	4104_ML_FinalNorm	AR-22Y-0000DHT	O95239	KIF4A	Chromosome-associated kinesin KIF4A (Chromokinesin-A)	0.859584	9.2E+07|NAN|8.5E+07	1.76682e+08	8.8341e+07	3	1.3E+07|1.7E+07|1.9E+07	4.8525e+07	1.6175e+07	3	0.6667	5.46158	0.0404	MQ	q	I
839	4104_ML_FinalNorm	AR-22Y-0060DHT	O95239	KIF4A	Chromosome-associated kinesin KIF4A (Chromokinesin-A)	0.859584	7.5E+07|NAN|NAN	7.48919e+07	7.48919e+07	3	1.3E+07|1.7E+07|1.9E+07	4.8525e+07	1.6175e+07	3	0.3333	4.6301	0.1476	MQ	q	I
840	4104_ML_FinalNorm	AR-WT-0000DHT	O95239	KIF4A	Chromosome-associated kinesin KIF4A (Chromokinesin-A)	0.859584	1.8E+06|9.7E+06|9.1E+06	2.05909e+07	6.86363e+06	3	1.3E+07|1.7E+07|1.9E+07	4.8525e+07	1.6175e+07	3	0.0185	0.424336	0.4373	MQ	q	I
841	4104_ML_FinalNorm	AR-WT-0060DHT	O95239	KIF4A	Chromosome-associated kinesin KIF4A (Chromokinesin-A)	0.859584	1.5E+07|1.6E+07|1.4E+07	4.41565e+07	1.47188e+07	3	1.3E+07|1.7E+07|1.9E+07	4.8525e+07	1.6175e+07	3	0.0367	0.909976	0.3491	MQ	q	I
842	4104_ML_FinalNorm	AR-22Y-0000DHT	O95292	VAPB	Vesicle-associated membrane protein-associated protein B/C (VAMP-B/VAMP-C) (VAMP-associated protein B/C) (VAP-B/VAP-C)	0.781429	3.4E+06|5.6E+06|7.2E+06	1.62057e+07	5.40191e+06	3	8.8E+06|7.4E+06|7.4E+06	2.35311e+07	7.84371e+06	3	0.0135	0.688694	0.4718	MQ	q	I
843	4104_ML_FinalNorm	AR-22Y-0060DHT	O95292	VAPB	Vesicle-associated membrane protein-associated protein B/C (VAMP-B/VAMP-C) (VAMP-associated protein B/C) (VAP-B/VAP-C)	0.781429	2.2E+06|5.1E+06|7.9E+06	1.52684e+07	5.08947e+06	3	8.8E+06|7.4E+06|7.4E+06	2.35311e+07	7.84371e+06	3	0.0132	0.64886	0.4738	MQ	q	I
844	4104_ML_FinalNorm	AR-WT-0000DHT	O95292	VAPB	Vesicle-associated membrane protein-associated protein B/C (VAMP-B/VAMP-C) (VAMP-associated protein B/C) (VAP-B/VAP-C)	0.781429	7.2E+06|4.9E+06|4.8E+06	1.69384e+07	5.64615e+06	3	8.8E+06|7.4E+06|7.4E+06	2.35311e+07	7.84371e+06	3	0.0142	0.719831	0.4658	MQ	q	I
845	4104_ML_FinalNorm	AR-WT-0060DHT	O95292	VAPB	Vesicle-associated membrane protein-associated protein B/C (VAMP-B/VAMP-C) (VAMP-associated protein B/C) (VAP-B/VAP-C)	0.781429	3.9E+06|4.3E+06|4.5E+06	1.26753e+07	4.22512e+06	3	8.8E+06|7.4E+06|7.4E+06	2.35311e+07	7.84371e+06	3	0.007	0.538663	0.5258	MQ	q	I
846	4104_ML_FinalNorm	AR-22Y-0000DHT	O95336	PGLS	6-phosphogluconolactonase (6PGL) (EC 3.1.1.31)	0.649594	NAN|9.6E+06|9.5E+06	1.9122e+07	9.56099e+06	3	9.3E+03|8.7E+03|8.5E+03	26478.2	8826.06	3	0.6667	1083.27	0.0404	MQ	q	I
847	4104_ML_FinalNorm	AR-22Y-0060DHT	O95336	PGLS	6-phosphogluconolactonase (6PGL) (EC 3.1.1.31)	0.649594	NAN|NAN|7.6E+06	7.59957e+06	7.59957e+06	3	9.3E+03|8.7E+03|8.5E+03	26478.2	8826.06	3	0.3333	861.037	0.1476	MQ	q	I
848	4104_ML_FinalNorm	AR-22Y-0000DHT	O95340	PAPSS2	Bifunctional 3'-phosphoadenosine 5'-phosphosulfate synthase 2 (PAPS synthase 2) (PAPSS 2) (Sulfurylase kinase 2) (SK 2) (SK2) [Includes: Sulfate adenylyltransferase (EC 2.7.7.4) (ATP-sulfurylase) (Sulfate adenylate transferase) (SAT); Adenylyl-sulfate kinase (EC 2.7.1.25) (3'-phosphoadenosine-5'-phosphosulfate synthase) (APS kinase) (Adenosine-5'-phosphosulfate 3'-phosphotransferase) (Adenylylsul…	0.454273	3.6E+07|4.4E+07|3.2E+07	1.12265e+08	3.74217e+07	3	1.9E+07|1.9E+07|1.7E+07	5.49191e+07	1.83064e+07	3	0.9917	2.04419	0.0003	MQ	q	I
849	4104_ML_FinalNorm	AR-22Y-0060DHT	O95340	PAPSS2	Bifunctional 3'-phosphoadenosine 5'-phosphosulfate synthase 2 (PAPS synthase 2) (PAPSS 2) (Sulfurylase kinase 2) (SK 2) (SK2) [Includes: Sulfate adenylyltransferase (EC 2.7.7.4) (ATP-sulfurylase) (Sulfate adenylate transferase) (SAT); Adenylyl-sulfate kinase (EC 2.7.1.25) (3'-phosphoadenosine-5'-phosphosulfate synthase) (APS kinase) (Adenosine-5'-phosphosulfate 3'-phosphotransferase) (Adenylylsul…	0.454273	6.8E+07|6.6E+07|6.5E+07	1.99919e+08	6.66397e+07	3	1.9E+07|1.9E+07|1.7E+07	5.49191e+07	1.83064e+07	3	1	3.64025	0	MQ	q	I
850	4104_ML_FinalNorm	AR-WT-0000DHT	O95340	PAPSS2	Bifunctional 3'-phosphoadenosine 5'-phosphosulfate synthase 2 (PAPS synthase 2) (PAPSS 2) (Sulfurylase kinase 2) (SK 2) (SK2) [Includes: Sulfate adenylyltransferase (EC 2.7.7.4) (ATP-sulfurylase) (Sulfate adenylate transferase) (SAT); Adenylyl-sulfate kinase (EC 2.7.1.25) (3'-phosphoadenosine-5'-phosphosulfate synthase) (APS kinase) (Adenosine-5'-phosphosulfate 3'-phosphotransferase) (Adenylylsul…	0.454273	6.3E+06|8.4E+06|7.8E+06	2.25832e+07	7.52774e+06	3	1.9E+07|1.9E+07|1.7E+07	5.49191e+07	1.83064e+07	3	0.0098	0.411209	0.4995	MQ	q	I
851	4104_ML_FinalNorm	AR-WT-0060DHT	O95340	PAPSS2	Bifunctional 3'-phosphoadenosine 5'-phosphosulfate synthase 2 (PAPS synthase 2) (PAPSS 2) (Sulfurylase kinase 2) (SK 2) (SK2) [Includes: Sulfate adenylyltransferase (EC 2.7.7.4) (ATP-sulfurylase) (Sulfate adenylate transferase) (SAT); Adenylyl-sulfate kinase (EC 2.7.1.25) (3'-phosphoadenosine-5'-phosphosulfate synthase) (APS kinase) (Adenosine-5'-phosphosulfate 3'-phosphotransferase) (Adenylylsul…	0.454273	8.7E+06|9.2E+06|7.9E+06	2.583e+07	8.60999e+06	3	1.9E+07|1.9E+07|1.7E+07	5.49191e+07	1.83064e+07	3	0.0122	0.470328	0.4813	MQ	q	I
852	4104_ML_FinalNorm	AR-22Y-0000DHT	O95347	SMC2	Structural maintenance of chromosomes protein 2 (SMC protein 2) (SMC-2) (Chromosome-associated protein E) (hCAP-E) (XCAP-E homolog)	0.924471	1.7E+07|2.2E+07|1.7E+07	5.57206e+07	1.85735e+07	3	3.6E+06|NAN|NAN	3.5816e+06	3.5816e+06	3	1	5.18582	0	MQ	q	I
853	4104_ML_FinalNorm	AR-22Y-0060DHT	O95347	SMC2	Structural maintenance of chromosomes protein 2 (SMC protein 2) (SMC-2) (Chromosome-associated protein E) (hCAP-E) (XCAP-E homolog)	0.924471	2.6E+07|2.8E+07|2.5E+07	7.89486e+07	2.63162e+07	3	3.6E+06|NAN|NAN	3.5816e+06	3.5816e+06	3	1	7.34761	0	MQ	q	I
854	4104_ML_FinalNorm	AR-WT-0000DHT	O95359	TACC2	Transforming acidic coiled-coil-containing protein 2 (Anti-Zuai-1) (AZU-1)	0.56714	3.0E+07|2.2E+07|2.2E+07	7.32766e+07	2.44255e+07	3	5.1E+06|4.0E+06|9.7E+05	1.00762e+07	3.35875e+06	3	0.9186	7.27222	0.0049	MQ	q	I
855	4104_ML_FinalNorm	AR-WT-0060DHT	O95359	TACC2	Transforming acidic coiled-coil-containing protein 2 (Anti-Zuai-1) (AZU-1)	0.56714	1.4E+07|1.5E+07|1.8E+07	4.75707e+07	1.58569e+07	3	5.1E+06|4.0E+06|9.7E+05	1.00762e+07	3.35875e+06	3	0.7928	4.72107	0.0156	MQ	q	I
856	4104_ML_FinalNorm	AR-22Y-0000DHT	O95372	LYPLA2	Acyl-protein thioesterase 2 (APT-2) (EC 3.1.2.-) (Lysophospholipase II) (LPL-II) (LysoPLA II)	0.763012	6.6E+06|6.2E+06|2.0E+06	1.48411e+07	4.94703e+06	3	1.6E+07|2.1E+07|2.1E+07	5.78708e+07	1.92903e+07	3	0.0136	0.256452	0.4707	MQ	q	I
857	4104_ML_FinalNorm	AR-22Y-0060DHT	O95372	LYPLA2	Acyl-protein thioesterase 2 (APT-2) (EC 3.1.2.-) (Lysophospholipase II) (LPL-II) (LysoPLA II)	0.763012	2.5E+06|NAN|NAN	2.5324e+06	2.5324e+06	3	1.6E+07|2.1E+07|2.1E+07	5.78708e+07	1.92903e+07	3	0.0024	0.131279	0.5812	MQ	q	I
858	4104_ML_FinalNorm	AR-WT-0000DHT	O95372	LYPLA2	Acyl-protein thioesterase 2 (APT-2) (EC 3.1.2.-) (Lysophospholipase II) (LPL-II) (LysoPLA II)	0.763012	6.8E+07|5.7E+07|5.7E+07	1.81972e+08	6.06572e+07	3	1.6E+07|2.1E+07|2.1E+07	5.78708e+07	1.92903e+07	3	1	3.14445	0	MQ	q	I
859	4104_ML_FinalNorm	AR-WT-0060DHT	O95372	LYPLA2	Acyl-protein thioesterase 2 (APT-2) (EC 3.1.2.-) (Lysophospholipase II) (LPL-II) (LysoPLA II)	0.763012	6.7E+07|7.4E+07|7.0E+07	2.11376e+08	7.04586e+07	3	1.6E+07|2.1E+07|2.1E+07	5.78708e+07	1.92903e+07	3	1	3.65255	0	MQ	q	I
860	4104_ML_FinalNorm	AR-22Y-0000DHT	O95373	IPO7	Importin-7 (Imp7) (Ran-binding protein 7) (RanBP7)	0.892032	6.5E+06|1.6E+07|1.1E+07	3.44268e+07	1.14756e+07	3	1.5E+08|1.4E+08|1.3E+08	4.19478e+08	1.39826e+08	3	0.0011	0.0820706	0.6013	MQ	q	I
861	4104_ML_FinalNorm	AR-22Y-0060DHT	O95373	IPO7	Importin-7 (Imp7) (Ran-binding protein 7) (RanBP7)	0.892032	1.0E+07|7.5E+06|2.5E+07	4.28165e+07	1.42722e+07	3	1.5E+08|1.4E+08|1.3E+08	4.19478e+08	1.39826e+08	3	0.0018	0.102071	0.5908	MQ	q	I
862	4104_ML_FinalNorm	AR-WT-0000DHT	O95373	IPO7	Importin-7 (Imp7) (Ran-binding protein 7) (RanBP7)	0.892032	8.7E+07|7.9E+07|8.9E+07	2.54463e+08	8.48211e+07	3	1.5E+08|1.4E+08|1.3E+08	4.19478e+08	1.39826e+08	3	0.0227	0.606619	0.412	MQ	q	I
863	4104_ML_FinalNorm	AR-WT-0060DHT	O95373	IPO7	Importin-7 (Imp7) (Ran-binding protein 7) (RanBP7)	0.892032	1.3E+08|1.1E+08|9.9E+07	3.34281e+08	1.11427e+08	3	1.5E+08|1.4E+08|1.3E+08	4.19478e+08	1.39826e+08	3	0.0293	0.796898	0.3768	MQ	q	I
864	4104_ML_FinalNorm	AR-WT-0000DHT	O95391	SLU7	Pre-mRNA-splicing factor SLU7 (hSlu7)	0.854249	2.1E+05|8.9E+05|9.5E+05	2.05785e+06	685952	3	8.1E+05|NAN|NAN	807926	807926	3	0.0648	0.849028	0.2978	MQ	q	I
865	4104_ML_FinalNorm	AR-WT-0060DHT	O95391	SLU7	Pre-mRNA-splicing factor SLU7 (hSlu7)	0.854249	1.7E+06|3.5E+06|3.6E+06	8.88172e+06	2.96057e+06	3	8.1E+05|NAN|NAN	807926	807926	3	1	3.66441	0	MQ	q	I
866	4104_ML_FinalNorm	AR-WT-0000DHT	O95425	SVIL	Supervillin (Archvillin) (p205/p250)	0.826652	1.8E+06|1.8E+06|2.6E+06	6.13858e+06	2.04619e+06	3	2.6E+06|3.9E+06|4.2E+06	1.07982e+07	3.5994e+06	3	0.0163	0.568481	0.4505	MQ	q	I
867	4104_ML_FinalNorm	AR-WT-0060DHT	O95425	SVIL	Supervillin (Archvillin) (p205/p250)	0.826652	2.6E+05|8.3E+05|1.8E+06	2.85368e+06	951228	3	2.6E+06|3.9E+06|4.2E+06	1.07982e+07	3.5994e+06	3	0.0042	0.264274	0.5547	MQ	q	I
868	4104_ML_FinalNorm	AR-22Y-0000DHT	O95433	AHSA1	Activator of 90 kDa heat shock protein ATPase homolog 1 (AHA1) (p38)	0.870567	7.9E+07|8.3E+07|8.3E+07	2.46101e+08	8.20337e+07	3	9.4E+07|8.0E+07|8.0E+07	2.5372e+08	8.45734e+07	3	0.0253	0.96997	0.3967	MQ	q	I
869	4104_ML_FinalNorm	AR-22Y-0060DHT	O95433	AHSA1	Activator of 90 kDa heat shock protein ATPase homolog 1 (AHA1) (p38)	0.870567	1.6E+08|1.3E+08|1.7E+08	4.50935e+08	1.50312e+08	3	9.4E+07|8.0E+07|8.0E+07	2.5372e+08	8.45734e+07	3	0.9008	1.77729	0.006	MQ	q	I
870	4104_ML_FinalNorm	AR-WT-0000DHT	O95433	AHSA1	Activator of 90 kDa heat shock protein ATPase homolog 1 (AHA1) (p38)	0.870567	3.5E+07|4.5E+07|4.3E+07	1.23474e+08	4.1158e+07	3	9.4E+07|8.0E+07|8.0E+07	2.5372e+08	8.45734e+07	3	0.0054	0.486653	0.541	MQ	q	I
871	4104_ML_FinalNorm	AR-WT-0060DHT	O95433	AHSA1	Activator of 90 kDa heat shock protein ATPase homolog 1 (AHA1) (p38)	0.870567	1.0E+08|1.8E+07|4.0E+07	1.58573e+08	5.28577e+07	3	9.4E+07|8.0E+07|8.0E+07	2.5372e+08	8.45734e+07	3	0.0227	0.624992	0.412	MQ	q	I
872	4104_ML_FinalNorm	AR-22Y-0000DHT	O95456	PSMG1	Proteasome assembly chaperone 1 (PAC-1) (Chromosome 21 leucine-rich protein) (C21-LRP) (Down syndrome critical region protein 2)	0.743818	7.7E+06|8.8E+06|8.0E+06	2.45972e+07	8.19908e+06	3	5.1E+06|3.7E+06|4.4E+06	1.31642e+07	4.38808e+06	3	0.9918	1.86849	0.0003	MQ	q	I
873	4104_ML_FinalNorm	AR-22Y-0060DHT	O95456	PSMG1	Proteasome assembly chaperone 1 (PAC-1) (Chromosome 21 leucine-rich protein) (C21-LRP) (Down syndrome critical region protein 2)	0.743818	NAN|NAN|4.8E+06	4.79129e+06	4.79129e+06	3	5.1E+06|3.7E+06|4.4E+06	1.31642e+07	4.38808e+06	3	0.0125	1.09189	0.4792	MQ	q	I
874	4104_ML_FinalNorm	AR-WT-0000DHT	O95456	PSMG1	Proteasome assembly chaperone 1 (PAC-1) (Chromosome 21 leucine-rich protein) (C21-LRP) (Down syndrome critical region protein 2)	0.743818	4.6E+06|3.2E+06|2.7E+06	1.04975e+07	3.49915e+06	3	5.1E+06|3.7E+06|4.4E+06	1.31642e+07	4.38808e+06	3	0.0183	0.797423	0.4381	MQ	q	I
875	4104_ML_FinalNorm	AR-WT-0060DHT	O95456	PSMG1	Proteasome assembly chaperone 1 (PAC-1) (Chromosome 21 leucine-rich protein) (C21-LRP) (Down syndrome critical region protein 2)	0.743818	9.8E+05|2.3E+06|NAN	3.27682e+06	1.63841e+06	3	5.1E+06|3.7E+06|4.4E+06	1.31642e+07	4.38808e+06	3	0.0023	0.373377	0.5825	MQ	q	I
876	4104_ML_FinalNorm	AR-22Y-0000DHT	O95478	NSA2	Ribosome biogenesis protein NSA2 homolog (Hairy cell leukemia protein 1) (TGF-beta-inducible nuclear protein 1)	0.6844	NAN|1.9E+06|NAN	1.87916e+06	1.87916e+06	3	7.3E+05|NAN|2.2E+06	2.93567e+06	1.46783e+06	3	0.0989	1.28023	0.2657	MQ	q	I
877	4104_ML_FinalNorm	AR-22Y-0060DHT	O95478	NSA2	Ribosome biogenesis protein NSA2 homolog (Hairy cell leukemia protein 1) (TGF-beta-inducible nuclear protein 1)	0.6844	NAN|1.3E+06|NAN	1.26558e+06	1.26558e+06	3	7.3E+05|NAN|2.2E+06	2.93567e+06	1.46783e+06	3	0.0497	0.862206	0.321	MQ	q	I
878	4104_ML_FinalNorm	AR-22Y-0000DHT	O95486	SEC24A	Protein transport protein Sec24A (SEC24-related protein A)	0.569814	4.0E+06|4.6E+06|2.5E+06	1.10115e+07	3.6705e+06	3	4.3E+06|3.5E+06|3.3E+06	1.10746e+07	3.69152e+06	3	0.0488	0.994305	0.3235	MQ	q	I
879	4104_ML_FinalNorm	AR-22Y-0060DHT	O95486	SEC24A	Protein transport protein Sec24A (SEC24-related protein A)	0.569814	NAN|3.0E+06|7.2E+06	1.01531e+07	5.07656e+06	3	4.3E+06|3.5E+06|3.3E+06	1.10746e+07	3.69152e+06	3	0.3388	1.37519	0.1449	MQ	q	I
880	4104_ML_FinalNorm	AR-WT-0000DHT	O95486	SEC24A	Protein transport protein Sec24A (SEC24-related protein A)	0.569814	2.2E+06|3.6E+06|3.1E+06	8.82727e+06	2.94242e+06	3	4.3E+06|3.5E+06|3.3E+06	1.10746e+07	3.69152e+06	3	0.0178	0.797076	0.4414	MQ	q	I
881	4104_ML_FinalNorm	AR-WT-0060DHT	O95486	SEC24A	Protein transport protein Sec24A (SEC24-related protein A)	0.569814	2.4E+06|2.0E+06|3.2E+06	7.51052e+06	2.50351e+06	3	4.3E+06|3.5E+06|3.3E+06	1.10746e+07	3.69152e+06	3	0.0126	0.678177	0.478	MQ	q	I
882	4104_ML_FinalNorm	AR-22Y-0000DHT	O95487	SEC24B	Protein transport protein Sec24B (SEC24-related protein B)	0.743768	5.1E+07|8.5E+07|9.2E+07	2.28435e+08	7.61449e+07	3	1.3E+07|1.6E+07|1.2E+07	4.12722e+07	1.37574e+07	3	1	5.53484	0	MQ	q	I
883	4104_ML_FinalNorm	AR-22Y-0060DHT	O95487	SEC24B	Protein transport protein Sec24B (SEC24-related protein B)	0.743768	3.0E+07|3.5E+07|2.9E+07	9.42486e+07	3.14162e+07	3	1.3E+07|1.6E+07|1.2E+07	4.12722e+07	1.37574e+07	3	1	2.28359	0	MQ	q	I
884	4104_ML_FinalNorm	AR-WT-0000DHT	O95487	SEC24B	Protein transport protein Sec24B (SEC24-related protein B)	0.743768	9.4E+06|1.2E+07|1.5E+07	3.6159e+07	1.2053e+07	3	1.3E+07|1.6E+07|1.2E+07	4.12722e+07	1.37574e+07	3	0.0234	0.87611	0.4061	MQ	q	I
885	4104_ML_FinalNorm	AR-WT-0060DHT	O95487	SEC24B	Protein transport protein Sec24B (SEC24-related protein B)	0.743768	1.8E+07|1.7E+07|2.1E+07	5.50113e+07	1.83371e+07	3	1.3E+07|1.6E+07|1.2E+07	4.12722e+07	1.37574e+07	3	0.2781	1.33289	0.1893	MQ	q	I
886	4104_ML_FinalNorm	AR-WT-0000DHT	O95551	TDP2	Tyrosyl-DNA phosphodiesterase 2 (Tyr-DNA phosphodiesterase 2) (hTDP2) (EC 3.1.4.-) (5'-tyrosyl-DNA phosphodiesterase) (5'-Tyr-DNA phosphodiesterase) (ETS1-associated protein 2) (ETS1-associated protein II) (EAPII) (TRAF and TNF receptor-associated protein) (Tyrosyl-RNA phosphodiesterase) (VPg unlinkase)	0.488858	9.1E+06|9.7E+06|1.0E+07	2.89933e+07	9.66443e+06	3	5.0E+06|5.9E+06|3.1E+06	1.39369e+07	4.64563e+06	3	0.7096	2.08033	0.0275	MQ	q	I
887	4104_ML_FinalNorm	AR-WT-0060DHT	O95551	TDP2	Tyrosyl-DNA phosphodiesterase 2 (Tyr-DNA phosphodiesterase 2) (hTDP2) (EC 3.1.4.-) (5'-tyrosyl-DNA phosphodiesterase) (5'-Tyr-DNA phosphodiesterase) (ETS1-associated protein 2) (ETS1-associated protein II) (EAPII) (TRAF and TNF receptor-associated protein) (Tyrosyl-RNA phosphodiesterase) (VPg unlinkase)	0.488858	1.0E+07|1.4E+07|8.3E+06	3.18947e+07	1.06316e+07	3	5.0E+06|5.9E+06|3.1E+06	1.39369e+07	4.64563e+06	3	0.7374	2.28851	0.0216	MQ	q	I
888	4104_ML_FinalNorm	AR-22Y-0000DHT	O95573	ACSL3	Fatty acid CoA ligase Acsl3 (Arachidonate--CoA ligase) (EC 6.2.1.15) (Long-chain acyl-CoA synthetase 3) (LACS 3) (Long-chain-fatty-acid--CoA ligase 3) (EC 6.2.1.3) (Medium-chain acyl-CoA ligase Acsl3) (EC 6.2.1.2)	0.838802	1.5E+06|6.6E+06|1.0E+07	1.82694e+07	6.08981e+06	3	1.6E+07|1.7E+07|1.4E+07	4.74324e+07	1.58108e+07	3	0.0158	0.385168	0.4545	MQ	q	I
889	4104_ML_FinalNorm	AR-22Y-0060DHT	O95573	ACSL3	Fatty acid CoA ligase Acsl3 (Arachidonate--CoA ligase) (EC 6.2.1.15) (Long-chain acyl-CoA synthetase 3) (LACS 3) (Long-chain-fatty-acid--CoA ligase 3) (EC 6.2.1.3) (Medium-chain acyl-CoA ligase Acsl3) (EC 6.2.1.2)	0.838802	1.4E+07|5.8E+06|7.4E+06	2.68021e+07	8.93403e+06	3	1.6E+07|1.7E+07|1.4E+07	4.74324e+07	1.58108e+07	3	0.0228	0.565059	0.4109	MQ	q	I
890	4104_ML_FinalNorm	AR-WT-0000DHT	O95573	ACSL3	Fatty acid CoA ligase Acsl3 (Arachidonate--CoA ligase) (EC 6.2.1.15) (Long-chain acyl-CoA synthetase 3) (LACS 3) (Long-chain-fatty-acid--CoA ligase 3) (EC 6.2.1.3) (Medium-chain acyl-CoA ligase Acsl3) (EC 6.2.1.2)	0.838802	1.1E+06|2.4E+05|2.6E+05	1.63305e+06	544350	3	1.6E+07|1.7E+07|1.4E+07	4.74324e+07	1.58108e+07	3	0.0007	0.034429	0.6098	MQ	q	I
891	4104_ML_FinalNorm	AR-WT-0060DHT	O95573	ACSL3	Fatty acid CoA ligase Acsl3 (Arachidonate--CoA ligase) (EC 6.2.1.15) (Long-chain acyl-CoA synthetase 3) (LACS 3) (Long-chain-fatty-acid--CoA ligase 3) (EC 6.2.1.3) (Medium-chain acyl-CoA ligase Acsl3) (EC 6.2.1.2)	0.838802	2.0E+06|1.3E+06|3.3E+06	6.64735e+06	2.21578e+06	3	1.6E+07|1.7E+07|1.4E+07	4.74324e+07	1.58108e+07	3	0.0051	0.140144	0.5449	MQ	q	I
892	4104_ML_FinalNorm	AR-22Y-0060DHT	O95639	CPSF4	Cleavage and polyadenylation specificity factor subunit 4 (Cleavage and polyadenylation specificity factor 30 kDa subunit) (CPSF 30 kDa subunit) (NS1 effector domain-binding protein 1) (Neb-1) (No arches homolog)	0.813095	2.7E+06|NAN|NAN	2.73356e+06	2.73356e+06	3	2.8E+07|2.2E+07|1.8E+07	6.79899e+07	2.26633e+07	3	0	0.120616	0.6339	MQ	q	I
893	4104_ML_FinalNorm	AR-WT-0000DHT	O95639	CPSF4	Cleavage and polyadenylation specificity factor subunit 4 (Cleavage and polyadenylation specificity factor 30 kDa subunit) (CPSF 30 kDa subunit) (NS1 effector domain-binding protein 1) (Neb-1) (No arches homolog)	0.813095	1.3E+06|2.3E+06|1.3E+06	4.91916e+06	1.63972e+06	3	2.8E+07|2.2E+07|1.8E+07	6.79899e+07	2.26633e+07	3	0	0.0723513	0.6339	MQ	q	I
894	4104_ML_FinalNorm	AR-WT-0060DHT	O95639	CPSF4	Cleavage and polyadenylation specificity factor subunit 4 (Cleavage and polyadenylation specificity factor 30 kDa subunit) (CPSF 30 kDa subunit) (NS1 effector domain-binding protein 1) (Neb-1) (No arches homolog)	0.813095	3.4E+06|3.2E+06|3.0E+06	9.63646e+06	3.21215e+06	3	2.8E+07|2.2E+07|1.8E+07	6.79899e+07	2.26633e+07	3	0.0001	0.141734	0.6286	MQ	q	I
895	4104_ML_FinalNorm	AR-WT-0000DHT	O95721	SNAP29	Synaptosomal-associated protein 29 (SNAP-29) (Soluble 29 kDa NSF attachment protein) (Vesicle-membrane fusion protein SNAP-29)	0.7923	1.1E+07|9.5E+06|1.1E+07	3.0569e+07	1.01897e+07	3	6.4E+06|6.3E+06|6.4E+06	1.91206e+07	6.37352e+06	3	0.8001	1.59875	0.0148	MQ	q	I
896	4104_ML_FinalNorm	AR-WT-0060DHT	O95721	SNAP29	Synaptosomal-associated protein 29 (SNAP-29) (Soluble 29 kDa NSF attachment protein) (Vesicle-membrane fusion protein SNAP-29)	0.7923	5.7E+06|5.4E+06|4.7E+06	1.58201e+07	5.27336e+06	3	6.4E+06|6.3E+06|6.4E+06	1.91206e+07	6.37352e+06	3	0.0186	0.827385	0.4364	MQ	q	I
897	4104_ML_FinalNorm	AR-WT-0000DHT	O95747	OXSR1	Serine/threonine-protein kinase OSR1 (EC 2.7.11.1) (Oxidative stress-responsive 1 protein)	0.628895	5.2E+05|1.4E+06|1.3E+06	3.26926e+06	1.08975e+06	3	3.0E+06|4.1E+06|1.8E+06	8.91637e+06	2.97212e+06	3	0.0091	0.366658	0.5059	MQ	q	I
898	4104_ML_FinalNorm	AR-22Y-0060DHT	O95758	PTBP3	Polypyrimidine tract-binding protein 3 (Regulator of differentiation 1) (Rod1)	0.828397	NAN|NAN|3.4E+06	3.3651e+06	3.3651e+06	3	3.0E+06|2.9E+06|4.9E+06	1.06994e+07	3.56647e+06	3	0.0157	0.943538	0.455	MQ	q	I
899	4104_ML_FinalNorm	AR-WT-0000DHT	O95758	PTBP3	Polypyrimidine tract-binding protein 3 (Regulator of differentiation 1) (Rod1)	0.828397	2.2E+06|1.8E+06|2.8E+06	6.78493e+06	2.26164e+06	3	3.0E+06|2.9E+06|4.9E+06	1.06994e+07	3.56647e+06	3	0.0215	0.634141	0.4183	MQ	q	I
900	4104_ML_FinalNorm	AR-WT-0060DHT	O95758	PTBP3	Polypyrimidine tract-binding protein 3 (Regulator of differentiation 1) (Rod1)	0.828397	3.6E+06|3.0E+06|2.7E+06	9.33353e+06	3.11118e+06	3	3.0E+06|2.9E+06|4.9E+06	1.06994e+07	3.56647e+06	3	0.041	0.872341	0.3386	MQ	q	I
901	4104_ML_FinalNorm	AR-WT-0000DHT	O95759	TBC1D8	TBC1 domain family member 8 (AD 3) (Vascular Rab-GAP/TBC-containing protein)	0.492991	1.3E+07|1.4E+07|1.2E+07	3.90156e+07	1.30052e+07	3	4.6E+06|5.2E+06|5.2E+06	1.49791e+07	4.99303e+06	3	1	2.60467	0	MQ	q	I
902	4104_ML_FinalNorm	AR-WT-0060DHT	O95759	TBC1D8	TBC1 domain family member 8 (AD 3) (Vascular Rab-GAP/TBC-containing protein)	0.492991	1.1E+07|5.4E+06|1.1E+07	2.72049e+07	9.06831e+06	3	4.6E+06|5.2E+06|5.2E+06	1.49791e+07	4.99303e+06	3	0.6785	1.81619	0.0345	MQ	q	I
903	4104_ML_FinalNorm	AR-22Y-0000DHT	O95782	AP2A1	AP-2 complex subunit alpha-1 (100 kDa coated vesicle protein A) (Adaptor protein complex AP-2 subunit alpha-1) (Adaptor-related protein complex 2 subunit alpha-1) (Alpha-adaptin A) (Alpha1-adaptin) (Clathrin assembly protein complex 2 alpha-A large chain) (Plasma membrane adaptor HA2/AP2 adaptin alpha A subunit)	0.767199	4.7E+06|1.0E+07|1.5E+07	3.00112e+07	1.00037e+07	3	9.6E+07|4.8E+07|4.9E+07	1.92764e+08	6.42547e+07	3	0.0054	0.155689	0.541	MQ	q	I
904	4104_ML_FinalNorm	AR-22Y-0060DHT	O95782	AP2A1	AP-2 complex subunit alpha-1 (100 kDa coated vesicle protein A) (Adaptor protein complex AP-2 subunit alpha-1) (Adaptor-related protein complex 2 subunit alpha-1) (Alpha-adaptin A) (Alpha1-adaptin) (Clathrin assembly protein complex 2 alpha-A large chain) (Plasma membrane adaptor HA2/AP2 adaptin alpha A subunit)	0.767199	7.3E+07|6.3E+07|8.6E+07	2.22347e+08	7.41155e+07	3	9.6E+07|4.8E+07|4.9E+07	1.92764e+08	6.42547e+07	3	0.1147	1.15346	0.2563	MQ	q	I
905	4104_ML_FinalNorm	AR-WT-0000DHT	O95782	AP2A1	AP-2 complex subunit alpha-1 (100 kDa coated vesicle protein A) (Adaptor protein complex AP-2 subunit alpha-1) (Adaptor-related protein complex 2 subunit alpha-1) (Alpha-adaptin A) (Alpha1-adaptin) (Clathrin assembly protein complex 2 alpha-A large chain) (Plasma membrane adaptor HA2/AP2 adaptin alpha A subunit)	0.767199	9.6E+06|1.0E+07|8.3E+06	2.81445e+07	9.3815e+06	3	9.6E+07|4.8E+07|4.9E+07	1.92764e+08	6.42547e+07	3	0.0039	0.146005	0.5591	MQ	q	I
906	4104_ML_FinalNorm	AR-WT-0060DHT	O95782	AP2A1	AP-2 complex subunit alpha-1 (100 kDa coated vesicle protein A) (Adaptor protein complex AP-2 subunit alpha-1) (Adaptor-related protein complex 2 subunit alpha-1) (Alpha-adaptin A) (Alpha1-adaptin) (Clathrin assembly protein complex 2 alpha-A large chain) (Plasma membrane adaptor HA2/AP2 adaptin alpha A subunit)	0.767199	6.5E+06|9.8E+06|6.1E+06	2.23663e+07	7.45545e+06	3	9.6E+07|4.8E+07|4.9E+07	1.92764e+08	6.42547e+07	3	0.0024	0.11603	0.5812	MQ	q	I
907	4104_ML_FinalNorm	AR-22Y-0000DHT	O95785	WIZ	Protein Wiz (Widely-interspaced zinc finger-containing protein) (Zinc finger protein 803)	0.82285	NAN|6.7E+05|NAN	665240	665240	3	2.2E+06|1.6E+06|1.6E+06	5.34762e+06	1.78254e+06	3	0.0074	0.373197	0.5211	MQ	q	I
908	4104_ML_FinalNorm	AR-WT-0000DHT	O95785	WIZ	Protein Wiz (Widely-interspaced zinc finger-containing protein) (Zinc finger protein 803)	0.82285	8.7E+05|NAN|NAN	867838	867838	3	2.2E+06|1.6E+06|1.6E+06	5.34762e+06	1.78254e+06	3	0.0086	0.486854	0.509	MQ	q	I
909	4104_ML_FinalNorm	AR-WT-0060DHT	O95785	WIZ	Protein Wiz (Widely-interspaced zinc finger-containing protein) (Zinc finger protein 803)	0.82285	1.8E+07|2.2E+07|2.2E+07	6.19121e+07	2.06374e+07	3	2.2E+06|1.6E+06|1.6E+06	5.34762e+06	1.78254e+06	3	1	11.5775	0	MQ	q	I
910	4104_ML_FinalNorm	AR-22Y-0000DHT	O95793	STAU1	Double-stranded RNA-binding protein Staufen homolog 1	0.893315	7.3E+07|6.0E+07|7.1E+07	2.03927e+08	6.79758e+07	3	2.9E+07|2.9E+07|2.5E+07	8.38079e+07	2.7936e+07	3	1	2.43327	0	MQ	q	I
911	4104_ML_FinalNorm	AR-22Y-0060DHT	O95793	STAU1	Double-stranded RNA-binding protein Staufen homolog 1	0.893315	3.0E+07|1.5E+07|1.5E+07	5.9586e+07	1.9862e+07	3	2.9E+07|2.9E+07|2.5E+07	8.38079e+07	2.7936e+07	3	0.0154	0.710983	0.4579	MQ	q	I
912	4104_ML_FinalNorm	AR-WT-0000DHT	O95793	STAU1	Double-stranded RNA-binding protein Staufen homolog 1	0.893315	1.6E+07|1.9E+07|2.1E+07	5.65378e+07	1.88459e+07	3	2.9E+07|2.9E+07|2.5E+07	8.38079e+07	2.7936e+07	3	0.0121	0.674612	0.4822	MQ	q	I
913	4104_ML_FinalNorm	AR-WT-0060DHT	O95793	STAU1	Double-stranded RNA-binding protein Staufen homolog 1	0.893315	3.0E+07|1.4E+07|1.7E+07	6.07194e+07	2.02398e+07	3	2.9E+07|2.9E+07|2.5E+07	8.38079e+07	2.7936e+07	3	0.016	0.724507	0.4532	MQ	q	I
914	4104_ML_FinalNorm	AR-WT-0000DHT	O95801	TTC4	Tetratricopeptide repeat protein 4 (TPR repeat protein 4)	0.125442	1.1E+07|1.1E+07|1.1E+07	3.32834e+07	1.10945e+07	3	1.2E+06|1.6E+06|NAN	2.76695e+06	1.38348e+06	3	1	8.01928	0	MQ	q	I
915	4104_ML_FinalNorm	AR-WT-0060DHT	O95801	TTC4	Tetratricopeptide repeat protein 4 (TPR repeat protein 4)	0.125442	5.8E+06|7.4E+06|6.3E+06	1.9421e+07	6.47368e+06	3	1.2E+06|1.6E+06|NAN	2.76695e+06	1.38348e+06	3	1	4.67928	0	MQ	q	I
916	4104_ML_FinalNorm	AR-22Y-0000DHT	O95816	BAG2	BAG family molecular chaperone regulator 2 (BAG-2) (Bcl-2-associated athanogene 2)	0.916481	5.2E+06|8.5E+06|1.0E+07	2.37292e+07	7.90974e+06	3	5.3E+06|4.3E+06|5.1E+06	1.46766e+07	4.89221e+06	3	0.6677	1.6168	0.0401	MQ	q	I
917	4104_ML_FinalNorm	AR-22Y-0060DHT	O95816	BAG2	BAG family molecular chaperone regulator 2 (BAG-2) (Bcl-2-associated athanogene 2)	0.916481	NAN|1.7E+06|NAN	1.72152e+06	1.72152e+06	3	5.3E+06|4.3E+06|5.1E+06	1.46766e+07	4.89221e+06	3	0.0007	0.351891	0.6098	MQ	q	I
918	4104_ML_FinalNorm	AR-WT-0000DHT	O95816	BAG2	BAG family molecular chaperone regulator 2 (BAG-2) (Bcl-2-associated athanogene 2)	0.916481	3.0E+06|2.9E+06|2.8E+06	8.68435e+06	2.89478e+06	3	5.3E+06|4.3E+06|5.1E+06	1.46766e+07	4.89221e+06	3	0.0088	0.591713	0.5077	MQ	q	I
919	4104_ML_FinalNorm	AR-WT-0060DHT	O95816	BAG2	BAG family molecular chaperone regulator 2 (BAG-2) (Bcl-2-associated athanogene 2)	0.916481	2.6E+06|3.6E+06|3.4E+06	9.54045e+06	3.18015e+06	3	5.3E+06|4.3E+06|5.1E+06	1.46766e+07	4.89221e+06	3	0.0113	0.650045	0.4882	MQ	q	I
920	4104_ML_FinalNorm	AR-22Y-0000DHT	O95817	BAG3	BAG family molecular chaperone regulator 3 (BAG-3) (Bcl-2-associated athanogene 3) (Bcl-2-binding protein Bis) (Docking protein CAIR-1)	0.781641	2.3E+06|7.2E+06|3.3E+06	1.27626e+07	4.25421e+06	3	3.9E+06|5.5E+06|5.3E+06	1.46827e+07	4.89422e+06	3	0.1221	0.869231	0.2532	MQ	q	I
921	4104_ML_FinalNorm	AR-22Y-0060DHT	O95817	BAG3	BAG family molecular chaperone regulator 3 (BAG-3) (Bcl-2-associated athanogene 3) (Bcl-2-binding protein Bis) (Docking protein CAIR-1)	0.781641	5.9E+06|2.1E+06|2.4E+06	1.04287e+07	3.47624e+06	3	3.9E+06|5.5E+06|5.3E+06	1.46827e+07	4.89422e+06	3	0.0282	0.710274	0.3814	MQ	q	I
922	4104_ML_FinalNorm	AR-WT-0000DHT	O95817	BAG3	BAG family molecular chaperone regulator 3 (BAG-3) (Bcl-2-associated athanogene 3) (Bcl-2-binding protein Bis) (Docking protein CAIR-1)	0.781641	1.3E+07|1.1E+07|1.2E+07	3.55447e+07	1.18482e+07	3	3.9E+06|5.5E+06|5.3E+06	1.46827e+07	4.89422e+06	3	0.9997	2.42086	0	MQ	q	I
923	4104_ML_FinalNorm	AR-WT-0060DHT	O95817	BAG3	BAG family molecular chaperone regulator 3 (BAG-3) (Bcl-2-associated athanogene 3) (Bcl-2-binding protein Bis) (Docking protein CAIR-1)	0.781641	6.2E+06|8.7E+06|8.1E+06	2.30309e+07	7.67695e+06	3	3.9E+06|5.5E+06|5.3E+06	1.46827e+07	4.89422e+06	3	0.5836	1.56857	0.0782	MQ	q	I
924	4104_ML_FinalNorm	AR-22Y-0000DHT	O95819	MAP4K4	Mitogen-activated protein kinase kinase kinase kinase 4 (EC 2.7.11.1) (HPK/GCK-like kinase HGK) (MAPK/ERK kinase kinase kinase 4) (MEK kinase kinase 4) (MEKKK 4) (Nck-interacting kinase)	0.679399	NAN|9.5E+05|1.2E+06	2.16743e+06	1.08371e+06	3	2.9E+06|3.1E+06|3.1E+06	9.15331e+06	3.0511e+06	3	0.0014	0.355187	0.5968	MQ	q	I
925	4104_ML_FinalNorm	AR-22Y-0060DHT	O95819	MAP4K4	Mitogen-activated protein kinase kinase kinase kinase 4 (EC 2.7.11.1) (HPK/GCK-like kinase HGK) (MAPK/ERK kinase kinase kinase 4) (MEK kinase kinase 4) (MEKKK 4) (Nck-interacting kinase)	0.679399	2.7E+06|1.2E+06|2.0E+06	5.88936e+06	1.96312e+06	3	2.9E+06|3.1E+06|3.1E+06	9.15331e+06	3.0511e+06	3	0.0117	0.643413	0.4855	MQ	q	I
926	4104_ML_FinalNorm	AR-WT-0000DHT	O95819	MAP4K4	Mitogen-activated protein kinase kinase kinase kinase 4 (EC 2.7.11.1) (HPK/GCK-like kinase HGK) (MAPK/ERK kinase kinase kinase 4) (MEK kinase kinase 4) (MEKKK 4) (Nck-interacting kinase)	0.679399	2.2E+06|2.2E+06|4.0E+06	8.45675e+06	2.81892e+06	3	2.9E+06|3.1E+06|3.1E+06	9.15331e+06	3.0511e+06	3	0.0637	0.923901	0.2998	MQ	q	I
927	4104_ML_FinalNorm	AR-WT-0060DHT	O95819	MAP4K4	Mitogen-activated protein kinase kinase kinase kinase 4 (EC 2.7.11.1) (HPK/GCK-like kinase HGK) (MAPK/ERK kinase kinase kinase 4) (MEK kinase kinase 4) (MEKKK 4) (Nck-interacting kinase)	0.679399	2.4E+06|1.2E+06|1.2E+06	4.70493e+06	1.56831e+06	3	2.9E+06|3.1E+06|3.1E+06	9.15331e+06	3.0511e+06	3	0.0072	0.514014	0.5233	MQ	q	I
928	4104_ML_FinalNorm	AR-22Y-0060DHT	O95831	AIFM1	Apoptosis-inducing factor 1, mitochondrial (EC 1.6.99.-) (Programmed cell death protein 8)	0.945128	4.3E+06|1.6E+06|1.4E+06	7.33852e+06	2.44617e+06	3	4.4E+06|4.4E+06|9.5E+06	1.83013e+07	6.10043e+06	3	0.0153	0.400984	0.4586	MQ	q	I
929	4104_ML_FinalNorm	AR-WT-0000DHT	O95831	AIFM1	Apoptosis-inducing factor 1, mitochondrial (EC 1.6.99.-) (Programmed cell death protein 8)	0.945128	5.9E+06|6.5E+06|7.3E+06	1.96528e+07	6.55093e+06	3	4.4E+06|4.4E+06|9.5E+06	1.83013e+07	6.10043e+06	3	0.0944	1.07385	0.2676	MQ	q	I
930	4104_ML_FinalNorm	AR-WT-0060DHT	O95831	AIFM1	Apoptosis-inducing factor 1, mitochondrial (EC 1.6.99.-) (Programmed cell death protein 8)	0.945128	3.6E+06|3.6E+06|3.6E+06	1.07874e+07	3.5958e+06	3	4.4E+06|4.4E+06|9.5E+06	1.83013e+07	6.10043e+06	3	0.0279	0.589434	0.3824	MQ	q	I
931	4104_ML_FinalNorm	AR-22Y-0000DHT	O95864	FADS2	Acyl-CoA 6-desaturase (EC 1.14.19.3) (Delta(6) fatty acid desaturase) (D6D) (Delta(6) desaturase) (Delta-6 desaturase) (Fatty acid desaturase 2)	0.125442	7.4E+06|2.3E+07|2.2E+07	5.21181e+07	1.73727e+07	3	1.9E+07|1.9E+07|2.1E+07	5.84335e+07	1.94778e+07	3	0.0345	0.891921	0.3557	MQ	q	I
932	4104_ML_FinalNorm	AR-22Y-0060DHT	O95864	FADS2	Acyl-CoA 6-desaturase (EC 1.14.19.3) (Delta(6) fatty acid desaturase) (D6D) (Delta(6) desaturase) (Delta-6 desaturase) (Fatty acid desaturase 2)	0.125442	2.5E+07|4.5E+07|3.7E+07	1.06875e+08	3.56248e+07	3	1.9E+07|1.9E+07|2.1E+07	5.84335e+07	1.94778e+07	3	0.7046	1.82899	0.0281	MQ	q	I
933	4104_ML_FinalNorm	AR-WT-0000DHT	O95864	FADS2	Acyl-CoA 6-desaturase (EC 1.14.19.3) (Delta(6) fatty acid desaturase) (D6D) (Delta(6) desaturase) (Delta-6 desaturase) (Fatty acid desaturase 2)	0.125442	1.8E+07|1.8E+07|1.8E+07	5.45064e+07	1.81688e+07	3	1.9E+07|1.9E+07|2.1E+07	5.84335e+07	1.94778e+07	3	0.0235	0.932793	0.4055	MQ	q	I
934	4104_ML_FinalNorm	AR-WT-0060DHT	O95864	FADS2	Acyl-CoA 6-desaturase (EC 1.14.19.3) (Delta(6) fatty acid desaturase) (D6D) (Delta(6) desaturase) (Delta-6 desaturase) (Fatty acid desaturase 2)	0.125442	1.5E+07|1.5E+07|1.9E+07	4.84811e+07	1.61604e+07	3	1.9E+07|1.9E+07|2.1E+07	5.84335e+07	1.94778e+07	3	0.0188	0.829679	0.435	MQ	q	I
935	4104_ML_FinalNorm	AR-22Y-0000DHT	O95994	AGR2	Anterior gradient protein 2 homolog (AG-2) (hAG-2) (HPC8) (Secreted cement gland protein XAG-2 homolog)	0	NAN|6.3E+06|3.1E+06	9.40419e+06	4.7021e+06	3	9.1E+05|9.9E+05|1.6E+06	3.47625e+06	1.15875e+06	3	0.6624	4.05791	0.0621	MQ	q	I
936	4104_ML_FinalNorm	AR-WT-0000DHT	O95994	AGR2	Anterior gradient protein 2 homolog (AG-2) (hAG-2) (HPC8) (Secreted cement gland protein XAG-2 homolog)	0	3.2E+06|3.0E+06|2.3E+06	8.48428e+06	2.82809e+06	3	9.1E+05|9.9E+05|1.6E+06	3.47625e+06	1.15875e+06	3	0.8961	2.44064	0.0062	MQ	q	I
937	4104_ML_FinalNorm	AR-WT-0060DHT	O95994	AGR2	Anterior gradient protein 2 homolog (AG-2) (hAG-2) (HPC8) (Secreted cement gland protein XAG-2 homolog)	0	5.1E+06|NAN|1.7E+06	6.78018e+06	3.39009e+06	3	9.1E+05|9.9E+05|1.6E+06	3.47625e+06	1.15875e+06	3	0.3977	2.92564	0.1174	MQ	q	I
938	4104_ML_FinalNorm	AR-22Y-0000DHT	O96008	TOMM40	Mitochondrial import receptor subunit TOM40 homolog (Protein Haymaker) (Translocase of outer membrane 40 kDa subunit homolog) (p38.5)	0.856447	NAN|NAN|6.3E+06	6.25054e+06	6.25054e+06	3	NAN|NAN|1.7E+06	1.72963e+06	1.72963e+06	3	0.3333	3.61381	0.1476	MQ	q	I
939	4104_ML_FinalNorm	AR-22Y-0060DHT	O96008	TOMM40	Mitochondrial import receptor subunit TOM40 homolog (Protein Haymaker) (Translocase of outer membrane 40 kDa subunit homolog) (p38.5)	0.856447	4.1E+07|3.6E+07|4.1E+07	1.18062e+08	3.9354e+07	3	NAN|NAN|1.7E+06	1.72963e+06	1.72963e+06	3	1	22.7529	0	MQ	q	I
940	4104_ML_FinalNorm	AR-WT-0000DHT	O96008	TOMM40	Mitochondrial import receptor subunit TOM40 homolog (Protein Haymaker) (Translocase of outer membrane 40 kDa subunit homolog) (p38.5)	0.856447	1.7E+06|1.6E+06|NAN	3.35492e+06	1.67746e+06	3	NAN|NAN|1.7E+06	1.72963e+06	1.72963e+06	3	0.0231	0.96984	0.4084	MQ	q	I
941	4104_ML_FinalNorm	AR-WT-0060DHT	O96008	TOMM40	Mitochondrial import receptor subunit TOM40 homolog (Protein Haymaker) (Translocase of outer membrane 40 kDa subunit homolog) (p38.5)	0.856447	3.4E+06|6.1E+06|2.8E+06	1.22699e+07	4.08998e+06	3	NAN|NAN|1.7E+06	1.72963e+06	1.72963e+06	3	0.9851	2.36466	0.0007	MQ	q	I
942	4104_ML_FinalNorm	AR-22Y-0000DHT	O96019	ACTL6A	Actin-like protein 6A (53 kDa BRG1-associated factor A) (Actin-related protein Baf53a) (ArpNbeta) (BRG1-associated factor 53A) (BAF53A) (INO80 complex subunit K)	0.880993	1.4E+06|2.7E+06|NAN	4.16178e+06	2.08089e+06	3	5.5E+06|4.8E+06|6.3E+06	1.65289e+07	5.50965e+06	3	0.0091	0.377681	0.5059	MQ	q	I
943	4104_ML_FinalNorm	AR-22Y-0060DHT	O96019	ACTL6A	Actin-like protein 6A (53 kDa BRG1-associated factor A) (Actin-related protein Baf53a) (ArpNbeta) (BRG1-associated factor 53A) (BAF53A) (INO80 complex subunit K)	0.880993	NAN|1.4E+06|3.3E+06	4.7078e+06	2.3539e+06	3	5.5E+06|4.8E+06|6.3E+06	1.65289e+07	5.50965e+06	3	0.0104	0.427232	0.4945	MQ	q	I
944	4104_ML_FinalNorm	AR-WT-0000DHT	O96019	ACTL6A	Actin-like protein 6A (53 kDa BRG1-associated factor A) (Actin-related protein Baf53a) (ArpNbeta) (BRG1-associated factor 53A) (BAF53A) (INO80 complex subunit K)	0.880993	1.1E+07|1.3E+07|1.4E+07	3.75209e+07	1.2507e+07	3	5.5E+06|4.8E+06|6.3E+06	1.65289e+07	5.50965e+06	3	0.9999	2.27001	0	MQ	q	I
945	4104_ML_FinalNorm	AR-WT-0060DHT	O96019	ACTL6A	Actin-like protein 6A (53 kDa BRG1-associated factor A) (Actin-related protein Baf53a) (ArpNbeta) (BRG1-associated factor 53A) (BAF53A) (INO80 complex subunit K)	0.880993	1.9E+07|2.9E+07|3.4E+07	8.24694e+07	2.74898e+07	3	5.5E+06|4.8E+06|6.3E+06	1.65289e+07	5.50965e+06	3	1	4.98939	0	MQ	q	I
946	4104_ML_FinalNorm	AR-22Y-0000DHT	P00156	MT-CYB	Cytochrome b (Complex III subunit 3) (Complex III subunit III) (Cytochrome b-c1 complex subunit 3) (Ubiquinol-cytochrome-c reductase complex cytochrome b subunit)	0	NAN|2.8E+06|2.1E+06	4.97688e+06	2.48844e+06	3	4.8E+03|7.6E+03|7.2E+03	19606.2	6535.41	3	0.6667	380.762	0.0404	MQ	q	I
947	4104_ML_FinalNorm	AR-22Y-0060DHT	P00156	MT-CYB	Cytochrome b (Complex III subunit 3) (Complex III subunit III) (Cytochrome b-c1 complex subunit 3) (Ubiquinol-cytochrome-c reductase complex cytochrome b subunit)	0	6.0E+06|5.3E+06|8.6E+06	1.99472e+07	6.64908e+06	3	4.8E+03|7.6E+03|7.2E+03	19606.2	6535.41	3	1	1017.39	0	MQ	q	I
948	4104_ML_FinalNorm	AR-22Y-0000DHT	P00338	LDHA	L-lactate dehydrogenase A chain (LDH-A) (EC 1.1.1.27) (Cell proliferation-inducing gene 19 protein) (LDH muscle subunit) (LDH-M) (Renal carcinoma antigen NY-REN-59)	0.954134	1.1E+09|1.1E+09|1.3E+09	3.49848e+09	1.16616e+09	3	2.3E+08|2.3E+08|2.3E+08	6.82385e+08	2.27462e+08	3	1	5.12684	0	MQ	q	I
949	4104_ML_FinalNorm	AR-22Y-0060DHT	P00338	LDHA	L-lactate dehydrogenase A chain (LDH-A) (EC 1.1.1.27) (Cell proliferation-inducing gene 19 protein) (LDH muscle subunit) (LDH-M) (Renal carcinoma antigen NY-REN-59)	0.954134	2.7E+08|2.3E+08|2.7E+08	7.7273e+08	2.57577e+08	3	2.3E+08|2.3E+08|2.3E+08	6.82385e+08	2.27462e+08	3	0.062	1.1324	0.3022	MQ	q	I
950	4104_ML_FinalNorm	AR-WT-0000DHT	P00338	LDHA	L-lactate dehydrogenase A chain (LDH-A) (EC 1.1.1.27) (Cell proliferation-inducing gene 19 protein) (LDH muscle subunit) (LDH-M) (Renal carcinoma antigen NY-REN-59)	0.954134	1.0E+08|8.2E+07|9.0E+07	2.74056e+08	9.13519e+07	3	2.3E+08|2.3E+08|2.3E+08	6.82385e+08	2.27462e+08	3	0.0134	0.401614	0.4728	MQ	q	I
951	4104_ML_FinalNorm	AR-WT-0060DHT	P00338	LDHA	L-lactate dehydrogenase A chain (LDH-A) (EC 1.1.1.27) (Cell proliferation-inducing gene 19 protein) (LDH muscle subunit) (LDH-M) (Renal carcinoma antigen NY-REN-59)	0.954134	6.9E+07|8.0E+07|7.9E+07	2.27783e+08	7.59278e+07	3	2.3E+08|2.3E+08|2.3E+08	6.82385e+08	2.27462e+08	3	0.0104	0.333805	0.4945	MQ	q	I
952	4104_ML_FinalNorm	AR-22Y-0000DHT	P00367	GLUD1	Glutamate dehydrogenase 1, mitochondrial (GDH 1) (EC 1.4.1.3)	0.921521	4.7E+07|5.7E+07|6.8E+07	1.71591e+08	5.7197e+07	3	6.0E+05|2.2E+06|8.1E+05	3.56497e+06	1.18832e+06	3	1	48.1326	0	MQ	q	I
953	4104_ML_FinalNorm	AR-22Y-0060DHT	P00367	GLUD1	Glutamate dehydrogenase 1, mitochondrial (GDH 1) (EC 1.4.1.3)	0.921521	1.4E+07|1.3E+07|1.4E+07	4.17717e+07	1.39239e+07	3	6.0E+05|2.2E+06|8.1E+05	3.56497e+06	1.18832e+06	3	0.9986	11.7173	0	MQ	q	I
954	4104_ML_FinalNorm	AR-WT-0000DHT	P00367	GLUD1	Glutamate dehydrogenase 1, mitochondrial (GDH 1) (EC 1.4.1.3)	0.921521	3.0E+06|3.8E+06|5.1E+06	1.19249e+07	3.97498e+06	3	6.0E+05|2.2E+06|8.1E+05	3.56497e+06	1.18832e+06	3	0.6105	3.34504	0.0739	MQ	q	I
955	4104_ML_FinalNorm	AR-WT-0060DHT	P00367	GLUD1	Glutamate dehydrogenase 1, mitochondrial (GDH 1) (EC 1.4.1.3)	0.921521	3.2E+06|1.7E+06|1.4E+06	6.35675e+06	2.11892e+06	3	6.0E+05|2.2E+06|8.1E+05	3.56497e+06	1.18832e+06	3	0.242	1.78312	0.2026	MQ	q	I
956	4104_ML_FinalNorm	AR-22Y-0000DHT	P00387	CYB5R3	NADH-cytochrome b5 reductase 3 (B5R) (Cytochrome b5 reductase) (EC 1.6.2.2) (Diaphorase-1) [Cleaved into: NADH-cytochrome b5 reductase 3 membrane-bound form; NADH-cytochrome b5 reductase 3 soluble form]	0.781726	2.6E+07|3.4E+07|3.4E+07	9.38636e+07	3.12879e+07	3	8.6E+06|8.2E+06|8.2E+06	2.50365e+07	8.34549e+06	3	1	3.74908	0	MQ	q	I
957	4104_ML_FinalNorm	AR-22Y-0060DHT	P00387	CYB5R3	NADH-cytochrome b5 reductase 3 (B5R) (Cytochrome b5 reductase) (EC 1.6.2.2) (Diaphorase-1) [Cleaved into: NADH-cytochrome b5 reductase 3 membrane-bound form; NADH-cytochrome b5 reductase 3 soluble form]	0.781726	3.1E+07|3.5E+07|3.5E+07	1.00801e+08	3.36005e+07	3	8.6E+06|8.2E+06|8.2E+06	2.50365e+07	8.34549e+06	3	1	4.02619	0	MQ	q	I
958	4104_ML_FinalNorm	AR-WT-0000DHT	P00387	CYB5R3	NADH-cytochrome b5 reductase 3 (B5R) (Cytochrome b5 reductase) (EC 1.6.2.2) (Diaphorase-1) [Cleaved into: NADH-cytochrome b5 reductase 3 membrane-bound form; NADH-cytochrome b5 reductase 3 soluble form]	0.781726	6.8E+06|6.8E+06|7.0E+06	2.06312e+07	6.87707e+06	3	8.6E+06|8.2E+06|8.2E+06	2.50365e+07	8.34549e+06	3	0.0232	0.824047	0.4078	MQ	q	I
959	4104_ML_FinalNorm	AR-WT-0060DHT	P00387	CYB5R3	NADH-cytochrome b5 reductase 3 (B5R) (Cytochrome b5 reductase) (EC 1.6.2.2) (Diaphorase-1) [Cleaved into: NADH-cytochrome b5 reductase 3 membrane-bound form; NADH-cytochrome b5 reductase 3 soluble form]	0.781726	6.6E+06|6.0E+06|4.9E+06	1.74516e+07	5.8172e+06	3	8.6E+06|8.2E+06|8.2E+06	2.50365e+07	8.34549e+06	3	0.0176	0.697047	0.4433	MQ	q	I
960	4104_ML_FinalNorm	AR-22Y-0000DHT	P00390	GSR	Glutathione reductase, mitochondrial (GR) (GRase) (EC 1.8.1.7)	0.668106	2.8E+06|4.3E+06|5.3E+06	1.22824e+07	4.09413e+06	3	6.3E+03|8.0E+03|1.1E+04	24928.2	8309.39	3	1	492.711	0	MQ	q	I
961	4104_ML_FinalNorm	AR-22Y-0060DHT	P00390	GSR	Glutathione reductase, mitochondrial (GR) (GRase) (EC 1.8.1.7)	0.668106	4.8E+06|5.5E+06|5.0E+06	1.52952e+07	5.09838e+06	3	6.3E+03|8.0E+03|1.1E+04	24928.2	8309.39	3	1	613.569	0	MQ	q	I
962	4104_ML_FinalNorm	AR-22Y-0000DHT	P00403	MT-CO2	Cytochrome c oxidase subunit 2 (EC 7.1.1.9) (Cytochrome c oxidase polypeptide II)	0.750451	2.6E+06|5.3E+06|4.7E+06	1.26629e+07	4.22097e+06	3	3.1E+06|2.4E+06|2.6E+06	8.09925e+06	2.69975e+06	3	0.6666	1.56347	0.0587	MQ	q	I
963	4104_ML_FinalNorm	AR-22Y-0060DHT	P00403	MT-CO2	Cytochrome c oxidase subunit 2 (EC 7.1.1.9) (Cytochrome c oxidase polypeptide II)	0.750451	1.0E+07|1.2E+07|7.8E+06	2.99443e+07	9.98145e+06	3	3.1E+06|2.4E+06|2.6E+06	8.09925e+06	2.69975e+06	3	1	3.69718	0	MQ	q	I
964	4104_ML_FinalNorm	AR-WT-0000DHT	P00403	MT-CO2	Cytochrome c oxidase subunit 2 (EC 7.1.1.9) (Cytochrome c oxidase polypeptide II)	0.750451	2.5E+06|3.4E+06|1.3E+06	7.12665e+06	2.37555e+06	3	3.1E+06|2.4E+06|2.6E+06	8.09925e+06	2.69975e+06	3	0.0425	0.879915	0.3356	MQ	q	I
965	4104_ML_FinalNorm	AR-WT-0060DHT	P00403	MT-CO2	Cytochrome c oxidase subunit 2 (EC 7.1.1.9) (Cytochrome c oxidase polypeptide II)	0.750451	2.3E+06|2.4E+06|2.6E+06	7.27772e+06	2.42591e+06	3	3.1E+06|2.4E+06|2.6E+06	8.09925e+06	2.69975e+06	3	0.0221	0.898568	0.4148	MQ	q	I
966	4104_ML_FinalNorm	AR-22Y-0000DHT	P00491	PNP	Purine nucleoside phosphorylase (PNP) (EC 2.4.2.1) (Inosine phosphorylase) (Inosine-guanosine phosphorylase)	0.834661	1.3E+06|7.7E+06|5.6E+06	1.45895e+07	4.86317e+06	3	6.8E+05|8.6E+05|7.5E+05	2.29563e+06	765210	3	0.9861	6.35534	0.0006	MQ	q	I
967	4104_ML_FinalNorm	AR-22Y-0060DHT	P00491	PNP	Purine nucleoside phosphorylase (PNP) (EC 2.4.2.1) (Inosine phosphorylase) (Inosine-guanosine phosphorylase)	0.834661	1.5E+06|NAN|4.3E+06	5.71899e+06	2.85949e+06	3	6.8E+05|8.6E+05|7.5E+05	2.29563e+06	765210	3	0.6659	3.73687	0.0602	MQ	q	I
968	4104_ML_FinalNorm	AR-WT-0000DHT	P00491	PNP	Purine nucleoside phosphorylase (PNP) (EC 2.4.2.1) (Inosine phosphorylase) (Inosine-guanosine phosphorylase)	0.834661	4.0E+06|3.9E+06|1.9E+06	9.75287e+06	3.25096e+06	3	6.8E+05|8.6E+05|7.5E+05	2.29563e+06	765210	3	1	4.24845	0	MQ	q	I
969	4104_ML_FinalNorm	AR-WT-0060DHT	P00491	PNP	Purine nucleoside phosphorylase (PNP) (EC 2.4.2.1) (Inosine phosphorylase) (Inosine-guanosine phosphorylase)	0.834661	1.8E+06|1.1E+06|1.5E+06	4.48259e+06	1.4942e+06	3	6.8E+05|8.6E+05|7.5E+05	2.29563e+06	765210	3	0.8252	1.95266	0.0123	MQ	q	I
970	4104_ML_FinalNorm	AR-WT-0060DHT	P00533	EGFR	Epidermal growth factor receptor (EC 2.7.10.1) (Proto-oncogene c-ErbB-1) (Receptor tyrosine-protein kinase erbB-1)	0.745344	NAN|NAN|7.4E+05	743742	743742	3	1.5E+06|4.3E+06|2.8E+06	8.58185e+06	2.86062e+06	3	0.0011	0.259994	0.6013	MQ	q	I
971	4104_ML_FinalNorm	AR-22Y-0000DHT	P00558	PGK1	Phosphoglycerate kinase 1 (EC 2.7.2.3) (Cell migration-inducing gene 10 protein) (Primer recognition protein 2) (PRP 2)	0.932038	4.3E+08|4.4E+08|4.7E+08	1.34721e+09	4.4907e+08	3	5.4E+07|5.6E+07|5.9E+07	1.68002e+08	5.60008e+07	3	1	8.01899	0	MQ	q	I
972	4104_ML_FinalNorm	AR-22Y-0060DHT	P00558	PGK1	Phosphoglycerate kinase 1 (EC 2.7.2.3) (Cell migration-inducing gene 10 protein) (Primer recognition protein 2) (PRP 2)	0.932038	2.3E+07|2.2E+07|3.0E+07	7.44802e+07	2.48267e+07	3	5.4E+07|5.6E+07|5.9E+07	1.68002e+08	5.60008e+07	3	0.0201	0.443328	0.4272	MQ	q	I
973	4104_ML_FinalNorm	AR-WT-0000DHT	P00558	PGK1	Phosphoglycerate kinase 1 (EC 2.7.2.3) (Cell migration-inducing gene 10 protein) (Primer recognition protein 2) (PRP 2)	0.932038	2.0E+07|2.0E+07|2.5E+07	6.3901e+07	2.13003e+07	3	5.4E+07|5.6E+07|5.9E+07	1.68002e+08	5.60008e+07	3	0.0177	0.380358	0.4421	MQ	q	I
974	4104_ML_FinalNorm	AR-WT-0060DHT	P00558	PGK1	Phosphoglycerate kinase 1 (EC 2.7.2.3) (Cell migration-inducing gene 10 protein) (Primer recognition protein 2) (PRP 2)	0.932038	1.6E+07|1.8E+07|1.4E+07	4.77696e+07	1.59232e+07	3	5.4E+07|5.6E+07|5.9E+07	1.68002e+08	5.60008e+07	3	0.0135	0.284339	0.4718	MQ	q	I
975	4104_ML_FinalNorm	AR-22Y-0000DHT	P00568	AK1	Adenylate kinase isoenzyme 1 (AK 1) (EC 2.7.4.3) (EC 2.7.4.6) (ATP-AMP transphosphorylase 1) (ATP:AMP phosphotransferase) (Adenylate monophosphate kinase) (Myokinase)	0.521722	3.5E+06|8.7E+06|4.0E+06	1.61239e+07	5.37465e+06	3	3.5E+06|4.1E+06|3.6E+06	1.11705e+07	3.7235e+06	3	0.3572	1.44344	0.1334	MQ	q	I
976	4104_ML_FinalNorm	AR-22Y-0060DHT	P00568	AK1	Adenylate kinase isoenzyme 1 (AK 1) (EC 2.7.4.3) (EC 2.7.4.6) (ATP-AMP transphosphorylase 1) (ATP:AMP phosphotransferase) (Adenylate monophosphate kinase) (Myokinase)	0.521722	6.3E+06|3.3E+06|6.8E+06	1.63931e+07	5.46436e+06	3	3.5E+06|4.1E+06|3.6E+06	1.11705e+07	3.7235e+06	3	0.6572	1.46753	0.0641	MQ	q	I
977	4104_ML_FinalNorm	AR-WT-0060DHT	P00568	AK1	Adenylate kinase isoenzyme 1 (AK 1) (EC 2.7.4.3) (EC 2.7.4.6) (ATP-AMP transphosphorylase 1) (ATP:AMP phosphotransferase) (Adenylate monophosphate kinase) (Myokinase)	0.521722	5.5E+05|NAN|6.5E+05	1.20001e+06	600007	3	3.5E+06|4.1E+06|3.6E+06	1.11705e+07	3.7235e+06	3	0.0012	0.161141	0.6	MQ	q	I
978	4104_ML_FinalNorm	AR-22Y-0000DHT	P00846	MT-ATP6	ATP synthase subunit a (F-ATPase protein 6)	0.671466	1.5E+07|1.5E+07|1.7E+07	4.62707e+07	1.54236e+07	3	2.6E+06|2.7E+06|2.2E+06	7.47512e+06	2.49171e+06	3	1	6.18996	0	MQ	q	I
979	4104_ML_FinalNorm	AR-22Y-0060DHT	P00846	MT-ATP6	ATP synthase subunit a (F-ATPase protein 6)	0.671466	6.6E+07|6.9E+07|9.2E+07	2.27722e+08	7.59072e+07	3	2.6E+06|2.7E+06|2.2E+06	7.47512e+06	2.49171e+06	3	1	30.4639	0	MQ	q	I
980	4104_ML_FinalNorm	AR-WT-0000DHT	P00846	MT-ATP6	ATP synthase subunit a (F-ATPase protein 6)	0.671466	1.1E+07|1.0E+07|1.1E+07	3.29481e+07	1.09827e+07	3	2.6E+06|2.7E+06|2.2E+06	7.47512e+06	2.49171e+06	3	1	4.4077	0	MQ	q	I
981	4104_ML_FinalNorm	AR-WT-0060DHT	P00846	MT-ATP6	ATP synthase subunit a (F-ATPase protein 6)	0.671466	1.2E+07|1.2E+07|1.3E+07	3.5896e+07	1.19653e+07	3	2.6E+06|2.7E+06|2.2E+06	7.47512e+06	2.49171e+06	3	1	4.80206	0	MQ	q	I
982	4104_ML_FinalNorm	AR-22Y-0000DHT	P01040	CSTA	Cystatin-A (Cystatin-AS) (Stefin-A) [Cleaved into: Cystatin-A, N-terminally processed]	0.851546	6.5E+06|1.3E+07|6.8E+06	2.67043e+07	8.90143e+06	3	4.5E+05|9.7E+05|1.2E+06	2.62532e+06	875106	3	0.9995	10.1718	0	MQ	q	I
983	4104_ML_FinalNorm	AR-22Y-0060DHT	P01040	CSTA	Cystatin-A (Cystatin-AS) (Stefin-A) [Cleaved into: Cystatin-A, N-terminally processed]	0.851546	4.1E+06|NAN|3.6E+06	7.72174e+06	3.86087e+06	3	4.5E+05|9.7E+05|1.2E+06	2.62532e+06	875106	3	0.6455	4.41189	0.0667	MQ	q	I
984	4104_ML_FinalNorm	AR-WT-0000DHT	P01040	CSTA	Cystatin-A (Cystatin-AS) (Stefin-A) [Cleaved into: Cystatin-A, N-terminally processed]	0.851546	NAN|1.4E+06|NAN	1.42957e+06	1.42957e+06	3	4.5E+05|9.7E+05|1.2E+06	2.62532e+06	875106	3	0.0727	1.63359	0.2899	MQ	q	I
985	4104_ML_FinalNorm	AR-WT-0060DHT	P01040	CSTA	Cystatin-A (Cystatin-AS) (Stefin-A) [Cleaved into: Cystatin-A, N-terminally processed]	0.851546	NAN|NAN|1.7E+06	1.7338e+06	1.7338e+06	3	4.5E+05|9.7E+05|1.2E+06	2.62532e+06	875106	3	0.1226	1.98124	0.2529	MQ	q	I
986	4104_ML_FinalNorm	AR-22Y-0000DHT	P01833	PIGR	Polymeric immunoglobulin receptor (PIgR) (Poly-Ig receptor) (Hepatocellular carcinoma-associated protein TB6) [Cleaved into: Secretory component]	0.631982	1.7E+06|9.4E+05|6.2E+05	3.28089e+06	1.09363e+06	3	6.0E+03|6.6E+03|9.6E+03	22201.9	7400.63	3	1	147.775	0	MQ	q	I
987	4104_ML_FinalNorm	AR-WT-0000DHT	P01833	PIGR	Polymeric immunoglobulin receptor (PIgR) (Poly-Ig receptor) (Hepatocellular carcinoma-associated protein TB6) [Cleaved into: Secretory component]	0.631982	3.4E+06|3.3E+06|3.2E+06	9.93973e+06	3.31324e+06	3	6.0E+03|6.6E+03|9.6E+03	22201.9	7400.63	3	1	447.698	0	MQ	q	I
988	4104_ML_FinalNorm	AR-22Y-0000DHT	P02545	LMNA	Prelamin-A/C [Cleaved into: Lamin-A/C (70 kDa lamin) (Renal carcinoma antigen NY-REN-32)]	0.948452	1.4E+09|1.3E+09|1.3E+09	4.05886e+09	1.35295e+09	3	3.3E+08|3.2E+08|4.1E+08	1.06235e+09	3.54118e+08	3	1	3.82063	0	MQ	q	I
989	4104_ML_FinalNorm	AR-22Y-0060DHT	P02545	LMNA	Prelamin-A/C [Cleaved into: Lamin-A/C (70 kDa lamin) (Renal carcinoma antigen NY-REN-32)]	0.948452	4.4E+09|4.6E+09|4.3E+09	1.33304e+10	4.44348e+09	3	3.3E+08|3.2E+08|4.1E+08	1.06235e+09	3.54118e+08	3	1	12.548	0	MQ	q	I
990	4104_ML_FinalNorm	AR-WT-0000DHT	P02545	LMNA	Prelamin-A/C [Cleaved into: Lamin-A/C (70 kDa lamin) (Renal carcinoma antigen NY-REN-32)]	0.948452	2.0E+08|2.0E+08|2.0E+08	6.0735e+08	2.0245e+08	3	3.3E+08|3.2E+08|4.1E+08	1.06235e+09	3.54118e+08	3	0.0241	0.571703	0.4028	MQ	q	I
991	4104_ML_FinalNorm	AR-WT-0060DHT	P02545	LMNA	Prelamin-A/C [Cleaved into: Lamin-A/C (70 kDa lamin) (Renal carcinoma antigen NY-REN-32)]	0.948452	2.5E+08|2.0E+08|2.2E+08	6.76365e+08	2.25455e+08	3	3.3E+08|3.2E+08|4.1E+08	1.06235e+09	3.54118e+08	3	0.0261	0.636667	0.3923	MQ	q	I
992	4104_ML_FinalNorm	AR-22Y-0000DHT	P02751	FN1	Fibronectin (FN) (Cold-insoluble globulin) (CIG) [Cleaved into: Anastellin; Ugl-Y1; Ugl-Y2; Ugl-Y3]	0.818853	2.8E+08|2.6E+08|2.8E+08	8.16835e+08	2.72278e+08	3	1.0E+06|1.6E+06|2.6E+06	5.22588e+06	1.74196e+06	3	1	156.306	0	MQ	q	I
993	4104_ML_FinalNorm	AR-22Y-0060DHT	P02751	FN1	Fibronectin (FN) (Cold-insoluble globulin) (CIG) [Cleaved into: Anastellin; Ugl-Y1; Ugl-Y2; Ugl-Y3]	0.818853	1.3E+08|1.4E+08|1.6E+08	4.35851e+08	1.45284e+08	3	1.0E+06|1.6E+06|2.6E+06	5.22588e+06	1.74196e+06	3	1	83.4025	0	MQ	q	I
994	4104_ML_FinalNorm	AR-WT-0000DHT	P02751	FN1	Fibronectin (FN) (Cold-insoluble globulin) (CIG) [Cleaved into: Anastellin; Ugl-Y1; Ugl-Y2; Ugl-Y3]	0.818853	1.0E+06|1.4E+06|3.9E+05	2.7588e+06	919600	3	1.0E+06|1.6E+06|2.6E+06	5.22588e+06	1.74196e+06	3	0.0491	0.527911	0.3226	MQ	q	I
995	4104_ML_FinalNorm	AR-WT-0060DHT	P02751	FN1	Fibronectin (FN) (Cold-insoluble globulin) (CIG) [Cleaved into: Anastellin; Ugl-Y1; Ugl-Y2; Ugl-Y3]	0.818853	1.5E+06|7.5E+05|7.5E+05	2.98042e+06	993472	3	1.0E+06|1.6E+06|2.6E+06	5.22588e+06	1.74196e+06	3	0.0509	0.570319	0.3199	MQ	q	I
996	4104_ML_FinalNorm	AR-22Y-0000DHT	P02786	TFRC	Transferrin receptor protein 1 (TR) (TfR) (TfR1) (Trfr) (T9) (p90) (CD antigen CD71) [Cleaved into: Transferrin receptor protein 1, serum form (sTfR)]	0.85024	3.5E+07|6.3E+07|5.9E+07	1.56416e+08	5.21387e+07	3	4.9E+07|5.0E+07|4.7E+07	1.45757e+08	4.85858e+07	3	0.0773	1.07313	0.2846	MQ	q	I
997	4104_ML_FinalNorm	AR-22Y-0060DHT	P02786	TFRC	Transferrin receptor protein 1 (TR) (TfR) (TfR1) (Trfr) (T9) (p90) (CD antigen CD71) [Cleaved into: Transferrin receptor protein 1, serum form (sTfR)]	0.85024	3.5E+07|3.5E+07|3.9E+07	1.09572e+08	3.65239e+07	3	4.9E+07|5.0E+07|4.7E+07	1.45757e+08	4.85858e+07	3	0.0152	0.751741	0.4595	MQ	q	I
998	4104_ML_FinalNorm	AR-WT-0000DHT	P02786	TFRC	Transferrin receptor protein 1 (TR) (TfR) (TfR1) (Trfr) (T9) (p90) (CD antigen CD71) [Cleaved into: Transferrin receptor protein 1, serum form (sTfR)]	0.85024	1.3E+07|1.4E+07|1.2E+07	3.82771e+07	1.2759e+07	3	4.9E+07|5.0E+07|4.7E+07	1.45757e+08	4.85858e+07	3	0.0008	0.262608	0.6074	MQ	q	I
999	4104_ML_FinalNorm	AR-WT-0060DHT	P02786	TFRC	Transferrin receptor protein 1 (TR) (TfR) (TfR1) (Trfr) (T9) (p90) (CD antigen CD71) [Cleaved into: Transferrin receptor protein 1, serum form (sTfR)]	0.85024	1.0E+07|1.4E+07|1.6E+07	4.04065e+07	1.34688e+07	3	4.9E+07|5.0E+07|4.7E+07	1.45757e+08	4.85858e+07	3	0.001	0.277218	0.6034	MQ	q	I
1000	4104_ML_FinalNorm	AR-WT-0000DHT	P02788	LTF	Lactotransferrin (Lactoferrin) (EC 3.4.21.-) (Growth-inhibiting protein 12) (Talalactoferrin) [Cleaved into: Lactoferricin-H (Lfcin-H); Kaliocin-1; Lactoferroxin-A; Lactoferroxin-B; Lactoferroxin-C]	0.80913	4.4E+05|6.2E+05|5.4E+05	1.60698e+06	535661	3	8.1E+03|7.6E+03|9.7E+03	25370.1	8456.68	3	1	63.3417	0	MQ	q	I
1001	4104_ML_FinalNorm	AR-22Y-0000DHT	P04040	CAT	Catalase (EC 1.11.1.6)	0.835673	2.5E+07|2.4E+07|2.2E+07	7.06966e+07	2.35655e+07	3	5.0E+05|5.1E+05|4.7E+05	1.4726e+06	490867	3	1	48.008	0	MQ	q	I
1002	4104_ML_FinalNorm	AR-22Y-0060DHT	P04040	CAT	Catalase (EC 1.11.1.6)	0.835673	2.8E+07|3.5E+07|4.0E+07	1.02951e+08	3.4317e+07	3	5.0E+05|5.1E+05|4.7E+05	1.4726e+06	490867	3	1	69.9109	0	MQ	q	I
1003	4104_ML_FinalNorm	AR-WT-0000DHT	P04040	CAT	Catalase (EC 1.11.1.6)	0.835673	9.4E+05|9.6E+05|1.5E+06	3.43042e+06	1.14347e+06	3	5.0E+05|5.1E+05|4.7E+05	1.4726e+06	490867	3	0.9972	2.32949	0.0001	MQ	q	I
1004	4104_ML_FinalNorm	AR-WT-0060DHT	P04040	CAT	Catalase (EC 1.11.1.6)	0.835673	1.6E+06|2.3E+06|8.3E+05	4.72804e+06	1.57601e+06	3	5.0E+05|5.1E+05|4.7E+05	1.4726e+06	490867	3	0.9605	3.21067	0.0021	MQ	q	I
1005	4104_ML_FinalNorm	AR-22Y-0000DHT	P04049	RAF1	RAF proto-oncogene serine/threonine-protein kinase (EC 2.7.11.1) (Proto-oncogene c-RAF) (cRaf) (Raf-1)	0.5453	NAN|NAN|2.1E+07	2.0916e+07	2.0916e+07	3	2.0E+06|1.6E+06|3.3E+06	6.90579e+06	2.30193e+06	3	0.3333	9.08629	0.1476	MQ	q	I
1006	4104_ML_FinalNorm	AR-22Y-0060DHT	P04049	RAF1	RAF proto-oncogene serine/threonine-protein kinase (EC 2.7.11.1) (Proto-oncogene c-RAF) (cRaf) (Raf-1)	0.5453	NAN|NAN|2.9E+07	2.86545e+07	2.86545e+07	3	2.0E+06|1.6E+06|3.3E+06	6.90579e+06	2.30193e+06	3	0.3333	12.448	0.1476	MQ	q	I
1007	4104_ML_FinalNorm	AR-WT-0000DHT	P04049	RAF1	RAF proto-oncogene serine/threonine-protein kinase (EC 2.7.11.1) (Proto-oncogene c-RAF) (cRaf) (Raf-1)	0.5453	NAN|4.7E+05|4.7E+05	939002	469501	3	2.0E+06|1.6E+06|3.3E+06	6.90579e+06	2.30193e+06	3	0.0198	0.20396	0.4293	MQ	q	I
1008	4104_ML_FinalNorm	AR-WT-0060DHT	P04049	RAF1	RAF proto-oncogene serine/threonine-protein kinase (EC 2.7.11.1) (Proto-oncogene c-RAF) (cRaf) (Raf-1)	0.5453	1.0E+07|9.6E+06|8.2E+06	2.81434e+07	9.38113e+06	3	2.0E+06|1.6E+06|3.3E+06	6.90579e+06	2.30193e+06	3	0.9956	4.07533	0.0002	MQ	q	I
1009	4104_ML_FinalNorm	AR-22Y-0000DHT	P04075	ALDOA	Fructose-bisphosphate aldolase A (EC 4.1.2.13) (Lung cancer antigen NY-LU-1) (Muscle-type aldolase)	0.971349	3.0E+07|3.8E+07|2.4E+07	9.20412e+07	3.06804e+07	3	5.7E+06|5.0E+06|4.0E+06	1.46644e+07	4.88812e+06	3	1	6.27652	0	MQ	q	I
1010	4104_ML_FinalNorm	AR-22Y-0060DHT	P04075	ALDOA	Fructose-bisphosphate aldolase A (EC 4.1.2.13) (Lung cancer antigen NY-LU-1) (Muscle-type aldolase)	0.971349	2.2E+07|2.2E+07|2.9E+07	7.28217e+07	2.42739e+07	3	5.7E+06|5.0E+06|4.0E+06	1.46644e+07	4.88812e+06	3	1	4.9659	0	MQ	q	I
1011	4104_ML_FinalNorm	AR-WT-0000DHT	P04075	ALDOA	Fructose-bisphosphate aldolase A (EC 4.1.2.13) (Lung cancer antigen NY-LU-1) (Muscle-type aldolase)	0.971349	1.5E+07|1.6E+07|1.3E+07	4.40322e+07	1.46774e+07	3	5.7E+06|5.0E+06|4.0E+06	1.46644e+07	4.88812e+06	3	1	3.00266	0	MQ	q	I
1012	4104_ML_FinalNorm	AR-WT-0060DHT	P04075	ALDOA	Fructose-bisphosphate aldolase A (EC 4.1.2.13) (Lung cancer antigen NY-LU-1) (Muscle-type aldolase)	0.971349	1.8E+07|2.0E+07|1.8E+07	5.6658e+07	1.8886e+07	3	5.7E+06|5.0E+06|4.0E+06	1.46644e+07	4.88812e+06	3	1	3.86365	0	MQ	q	I
1013	4104_ML_FinalNorm	AR-22Y-0000DHT	P04080	CSTB	Cystatin-B (CPI-B) (Liver thiol proteinase inhibitor) (Stefin-B)	0.82407	2.2E+08|2.7E+08|2.7E+08	7.51244e+08	2.50415e+08	3	1.7E+07|1.4E+07|1.5E+07	4.64807e+07	1.54936e+07	3	1	16.1625	0	MQ	q	I
1014	4104_ML_FinalNorm	AR-22Y-0060DHT	P04080	CSTB	Cystatin-B (CPI-B) (Liver thiol proteinase inhibitor) (Stefin-B)	0.82407	2.5E+08|2.9E+08|2.6E+08	8.09901e+08	2.69967e+08	3	1.7E+07|1.4E+07|1.5E+07	4.64807e+07	1.54936e+07	3	1	17.4245	0	MQ	q	I
1015	4104_ML_FinalNorm	AR-WT-0000DHT	P04080	CSTB	Cystatin-B (CPI-B) (Liver thiol proteinase inhibitor) (Stefin-B)	0.82407	8.1E+06|3.8E+06|4.6E+06	1.64581e+07	5.48605e+06	3	1.7E+07|1.4E+07|1.5E+07	4.64807e+07	1.54936e+07	3	0.0199	0.354085	0.4284	MQ	q	I
1016	4104_ML_FinalNorm	AR-WT-0060DHT	P04080	CSTB	Cystatin-B (CPI-B) (Liver thiol proteinase inhibitor) (Stefin-B)	0.82407	5.2E+06|1.2E+07|8.2E+06	2.51322e+07	8.37741e+06	3	1.7E+07|1.4E+07|1.5E+07	4.64807e+07	1.54936e+07	3	0.0239	0.540702	0.4042	MQ	q	I
1017	4104_ML_FinalNorm	AR-22Y-0000DHT	P04083	ANXA1	Annexin A1 (Annexin I) (Annexin-1) (Calpactin II) (Calpactin-2) (Chromobindin-9) (Lipocortin I) (Phospholipase A2 inhibitory protein) (p35)	0.84235	6.1E+07|6.4E+07|4.2E+07	1.66866e+08	5.56219e+07	3	2.1E+08|1.7E+08|2.1E+08	5.95126e+08	1.98375e+08	3	0.0011	0.280387	0.6013	MQ	q	I
1018	4104_ML_FinalNorm	AR-22Y-0060DHT	P04083	ANXA1	Annexin A1 (Annexin I) (Annexin-1) (Calpactin II) (Calpactin-2) (Chromobindin-9) (Lipocortin I) (Phospholipase A2 inhibitory protein) (p35)	0.84235	2.4E+07|2.7E+07|3.1E+07	8.10482e+07	2.70161e+07	3	2.1E+08|1.7E+08|2.1E+08	5.95126e+08	1.98375e+08	3	0.0001	0.136187	0.6286	MQ	q	I
1019	4104_ML_FinalNorm	AR-WT-0000DHT	P04083	ANXA1	Annexin A1 (Annexin I) (Annexin-1) (Calpactin II) (Calpactin-2) (Chromobindin-9) (Lipocortin I) (Phospholipase A2 inhibitory protein) (p35)	0.84235	1.2E+08|1.1E+08|1.2E+08	3.53378e+08	1.17793e+08	3	2.1E+08|1.7E+08|2.1E+08	5.95126e+08	1.98375e+08	3	0.009	0.593786	0.5064	MQ	q	I
1020	4104_ML_FinalNorm	AR-WT-0060DHT	P04083	ANXA1	Annexin A1 (Annexin I) (Annexin-1) (Calpactin II) (Calpactin-2) (Chromobindin-9) (Lipocortin I) (Phospholipase A2 inhibitory protein) (p35)	0.84235	8.4E+07|1.0E+08|8.2E+07	2.69159e+08	8.97197e+07	3	2.1E+08|1.7E+08|2.1E+08	5.95126e+08	1.98375e+08	3	0.0044	0.452272	0.5532	MQ	q	I
1021	4104_ML_FinalNorm	AR-22Y-0000DHT	P04114	APOB	Apolipoprotein B-100 (Apo B-100) [Cleaved into: Apolipoprotein B-48 (Apo B-48)]	0.695251	3.6E+07|3.9E+07|4.3E+07	1.19237e+08	3.97456e+07	3	6.6E+03|6.9E+03|9.2E+03	22711	7570.33	3	1	5250.18	0	MQ	q	I
1022	4104_ML_FinalNorm	AR-22Y-0060DHT	P04114	APOB	Apolipoprotein B-100 (Apo B-100) [Cleaved into: Apolipoprotein B-48 (Apo B-48)]	0.695251	7.9E+06|8.9E+06|7.9E+06	2.4626e+07	8.20866e+06	3	6.6E+03|6.9E+03|9.2E+03	22711	7570.33	3	1	1084.32	0	MQ	q	I
1023	4104_ML_FinalNorm	AR-WT-0000DHT	P04150	NR3C1	Glucocorticoid receptor (GR) (Nuclear receptor subfamily 3 group C member 1)	0.797415	4.1E+06|4.2E+06|4.1E+06	1.24256e+07	4.14187e+06	3	1.4E+06|1.3E+06|2.1E+06	4.82597e+06	1.60866e+06	3	0.9973	2.57474	0.0001	MQ	q	I
1024	4104_ML_FinalNorm	AR-WT-0060DHT	P04150	NR3C1	Glucocorticoid receptor (GR) (Nuclear receptor subfamily 3 group C member 1)	0.797415	3.3E+06|2.6E+06|2.7E+06	8.63029e+06	2.87676e+06	3	1.4E+06|1.3E+06|2.1E+06	4.82597e+06	1.60866e+06	3	0.6439	1.7883	0.0671	MQ	q	I
1025	4104_ML_FinalNorm	AR-22Y-0000DHT	P04156	PRNP	Major prion protein (PrP) (ASCR) (PrP27-30) (PrP33-35C) (CD antigen CD230)	0.222923	NAN|7.0E+06|4.8E+06	1.18128e+07	5.90642e+06	3	NAN|NAN|6.1E+05	612629	612629	3	0.6667	9.6411	0.0404	MQ	q	I
1026	4104_ML_FinalNorm	AR-22Y-0060DHT	P04156	PRNP	Major prion protein (PrP) (ASCR) (PrP27-30) (PrP33-35C) (CD antigen CD230)	0.222923	2.9E+06|2.1E+06|3.9E+06	8.90851e+06	2.9695e+06	3	NAN|NAN|6.1E+05	612629	612629	3	1	4.84714	0	MQ	q	I
1027	4104_ML_FinalNorm	AR-WT-0000DHT	P04156	PRNP	Major prion protein (PrP) (ASCR) (PrP27-30) (PrP33-35C) (CD antigen CD230)	0.222923	6.3E+05|NAN|NAN	632593	632593	3	NAN|NAN|6.1E+05	612629	612629	3	0.0098	1.03259	0.4995	MQ	q	I
1028	4104_ML_FinalNorm	AR-22Y-0060DHT	P04183	TK1	Thymidine kinase, cytosolic (EC 2.7.1.21)	0.510632	4.7E+06|4.4E+06|2.7E+06	1.1832e+07	3.944e+06	3	4.1E+06|4.2E+06|3.8E+06	1.21539e+07	4.05129e+06	3	0.0339	0.973515	0.3572	MQ	q	I
1029	4104_ML_FinalNorm	AR-WT-0000DHT	P04183	TK1	Thymidine kinase, cytosolic (EC 2.7.1.21)	0.510632	4.8E+06|3.9E+06|4.5E+06	1.32219e+07	4.4073e+06	3	4.1E+06|4.2E+06|3.8E+06	1.21539e+07	4.05129e+06	3	0.0434	1.08787	0.3327	MQ	q	I
1030	4104_ML_FinalNorm	AR-WT-0060DHT	P04183	TK1	Thymidine kinase, cytosolic (EC 2.7.1.21)	0.510632	1.4E+06|2.1E+06|2.7E+06	6.23129e+06	2.0771e+06	3	4.1E+06|4.2E+06|3.8E+06	1.21539e+07	4.05129e+06	3	0.0067	0.512699	0.5282	MQ	q	I
1031	4104_ML_FinalNorm	AR-22Y-0000DHT	P04259	KRT6B	Keratin, type II cytoskeletal 6B (Cytokeratin-6B) (CK-6B) (Keratin-6B) (K6B) (Type-II keratin Kb10)	0.99594	5.7E+07|3.0E+07|NAN	8.72278e+07	4.36139e+07	3	1.8E+06|NAN|3.2E+06	5.02833e+06	2.51417e+06	3	0.6667	17.3473	0.0404	MQ	q	I
1032	4104_ML_FinalNorm	AR-22Y-0060DHT	P04259	KRT6B	Keratin, type II cytoskeletal 6B (Cytokeratin-6B) (CK-6B) (Keratin-6B) (K6B) (Type-II keratin Kb10)	0.99594	3.3E+07|3.0E+07|3.2E+07	9.46248e+07	3.15416e+07	3	1.8E+06|NAN|3.2E+06	5.02833e+06	2.51417e+06	3	1	12.5456	0	MQ	q	I
1033	4104_ML_FinalNorm	AR-WT-0000DHT	P04259	KRT6B	Keratin, type II cytoskeletal 6B (Cytokeratin-6B) (CK-6B) (Keratin-6B) (K6B) (Type-II keratin Kb10)	0.99594	NAN|1.1E+06|NAN	1.0644e+06	1.0644e+06	3	1.8E+06|NAN|3.2E+06	5.02833e+06	2.51417e+06	3	0.0072	0.42336	0.5233	MQ	q	I
1034	4104_ML_FinalNorm	AR-WT-0000DHT	P04279	SEMG1	Semenogelin-1 (Cancer/testis antigen 103) (Semenogelin I) (SGI) [Cleaved into: Alpha-inhibin-92; Alpha-inhibin-31; Seminal basic protein]	0.56714	1.9E+06|1.6E+06|1.6E+06	4.98956e+06	1.66319e+06	3	5.3E+03|9.6E+03|1.0E+04	25374.3	8458.11	3	1	196.638	0	MQ	q	I
1035	4104_ML_FinalNorm	AR-22Y-0000DHT	P04350	TUBB4A	Tubulin beta-4A chain (Tubulin 5 beta) (Tubulin beta-4 chain)	0.997363	7.1E+07|5.6E+07|5.1E+07	1.78417e+08	5.94722e+07	3	3.2E+07|2.6E+07|1.6E+07	7.43059e+07	2.47686e+07	3	0.6547	2.40111	0.0647	MQ	q	I
1036	4104_ML_FinalNorm	AR-22Y-0060DHT	P04350	TUBB4A	Tubulin beta-4A chain (Tubulin 5 beta) (Tubulin beta-4 chain)	0.997363	7.7E+07|2.6E+08|9.0E+07	4.22592e+08	1.40864e+08	3	3.2E+07|2.6E+07|1.6E+07	7.43059e+07	2.47686e+07	3	0.9816	5.68719	0.0009	MQ	q	I
1037	4104_ML_FinalNorm	AR-WT-0000DHT	P04350	TUBB4A	Tubulin beta-4A chain (Tubulin 5 beta) (Tubulin beta-4 chain)	0.997363	NAN|1.5E+06|1.5E+06	2.99931e+06	1.49966e+06	3	3.2E+07|2.6E+07|1.6E+07	7.43059e+07	2.47686e+07	3	0.011	0.0605466	0.4902	MQ	q	I
1038	4104_ML_FinalNorm	AR-WT-0060DHT	P04350	TUBB4A	Tubulin beta-4A chain (Tubulin 5 beta) (Tubulin beta-4 chain)	0.997363	NAN|1.8E+06|2.2E+06	4.04384e+06	2.02192e+06	3	3.2E+07|2.6E+07|1.6E+07	7.43059e+07	2.47686e+07	3	0.0136	0.0816324	0.4707	MQ	q	I
1039	4104_ML_FinalNorm	AR-22Y-0000DHT	P04406	GAPDH	Glyceraldehyde-3-phosphate dehydrogenase (GAPDH) (EC 1.2.1.12) (Peptidyl-cysteine S-nitrosylase GAPDH) (EC 2.6.99.-)	0.989114	1.5E+08|1.3E+08|1.4E+08	4.08794e+08	1.36265e+08	3	3.6E+07|3.7E+07|3.2E+07	1.05659e+08	3.52196e+07	3	1	3.869	0	MQ	q	I
1040	4104_ML_FinalNorm	AR-22Y-0060DHT	P04406	GAPDH	Glyceraldehyde-3-phosphate dehydrogenase (GAPDH) (EC 1.2.1.12) (Peptidyl-cysteine S-nitrosylase GAPDH) (EC 2.6.99.-)	0.989114	1.4E+08|1.3E+08|1.1E+08	3.81621e+08	1.27207e+08	3	3.6E+07|3.7E+07|3.2E+07	1.05659e+08	3.52196e+07	3	1	3.61182	0	MQ	q	I
1041	4104_ML_FinalNorm	AR-WT-0000DHT	P04406	GAPDH	Glyceraldehyde-3-phosphate dehydrogenase (GAPDH) (EC 1.2.1.12) (Peptidyl-cysteine S-nitrosylase GAPDH) (EC 2.6.99.-)	0.989114	6.1E+07|6.3E+07|5.9E+07	1.83089e+08	6.10296e+07	3	3.6E+07|3.7E+07|3.2E+07	1.05659e+08	3.52196e+07	3	0.9632	1.73283	0.002	MQ	q	I
1042	4104_ML_FinalNorm	AR-WT-0060DHT	P04406	GAPDH	Glyceraldehyde-3-phosphate dehydrogenase (GAPDH) (EC 1.2.1.12) (Peptidyl-cysteine S-nitrosylase GAPDH) (EC 2.6.99.-)	0.989114	6.6E+07|6.8E+07|6.3E+07	1.97253e+08	6.57511e+07	3	3.6E+07|3.7E+07|3.2E+07	1.05659e+08	3.52196e+07	3	0.9932	1.86689	0.0003	MQ	q	I
1043	4104_ML_FinalNorm	AR-22Y-0000DHT	P04424	ASL	Argininosuccinate lyase (ASAL) (EC 4.3.2.1) (Arginosuccinase)	0	1.1E+07|8.3E+06|8.5E+06	2.74528e+07	9.15095e+06	3	NAN|NAN|4.9E+06	4.92777e+06	4.92777e+06	3	0.9946	1.85702	0.0002	MQ	q	I
1044	4104_ML_FinalNorm	AR-22Y-0060DHT	P04424	ASL	Argininosuccinate lyase (ASAL) (EC 4.3.2.1) (Arginosuccinase)	0	1.1E+07|1.0E+07|9.0E+06	3.0212e+07	1.00707e+07	3	NAN|NAN|4.9E+06	4.92777e+06	4.92777e+06	3	0.9996	2.04366	0	MQ	q	I
1045	4104_ML_FinalNorm	AR-WT-0000DHT	P04424	ASL	Argininosuccinate lyase (ASAL) (EC 4.3.2.1) (Arginosuccinase)	0	4.1E+06|NAN|3.5E+06	7.66249e+06	3.83125e+06	3	NAN|NAN|4.9E+06	4.92777e+06	4.92777e+06	3	0.0126	0.777481	0.478	MQ	q	I
1046	4104_ML_FinalNorm	AR-WT-0060DHT	P04424	ASL	Argininosuccinate lyase (ASAL) (EC 4.3.2.1) (Arginosuccinase)	0	NAN|2.2E+06|NAN	2.15185e+06	2.15185e+06	3	NAN|NAN|4.9E+06	4.92777e+06	4.92777e+06	3	0.0016	0.436677	0.5937	MQ	q	I
1047	4104_ML_FinalNorm	AR-22Y-0000DHT	P04439	HLA-A	HLA class I histocompatibility antigen, A alpha chain (Human leukocyte antigen A) (HLA-A)	0	8.6E+05|7.4E+05|NAN	1.60012e+06	800058	3	4.4E+03|1.1E+04|9.3E+03	24473.3	8157.78	3	0.6667	98.073	0.0404	MQ	q	I
1048	4104_ML_FinalNorm	AR-22Y-0060DHT	P04439	HLA-A	HLA class I histocompatibility antigen, A alpha chain (Human leukocyte antigen A) (HLA-A)	0	1.7E+06|NAN|NAN	1.72747e+06	1.72747e+06	3	4.4E+03|1.1E+04|9.3E+03	24473.3	8157.78	3	0.3333	211.757	0.1476	MQ	q	I
1049	4104_ML_FinalNorm	AR-WT-0000DHT	P04439	HLA-A	HLA class I histocompatibility antigen, A alpha chain (Human leukocyte antigen A) (HLA-A)	0	NAN|1.6E+05|1.3E+05	280345	140172	3	4.4E+03|1.1E+04|9.3E+03	24473.3	8157.78	3	0.6667	17.1827	0.0404	MQ	q	I
1050	4104_ML_FinalNorm	AR-WT-0060DHT	P04439	HLA-A	HLA class I histocompatibility antigen, A alpha chain (Human leukocyte antigen A) (HLA-A)	0	2.2E+05|NAN|1.7E+05	392781	196391	3	4.4E+03|1.1E+04|9.3E+03	24473.3	8157.78	3	0.6667	24.074	0.0404	MQ	q	I
1051	4104_ML_FinalNorm	AR-22Y-0000DHT	P04792	HSPB1	Heat shock protein beta-1 (HspB1) (28 kDa heat shock protein) (Estrogen-regulated 24 kDa protein) (Heat shock 27 kDa protein) (HSP 27) (Stress-responsive protein 27) (SRP27)	0.916686	1.3E+09|1.2E+09|1.3E+09	3.82271e+09	1.27424e+09	3	1.9E+08|2.0E+08|1.9E+08	5.79991e+08	1.9333e+08	3	1	6.59098	0	MQ	q	I
1052	4104_ML_FinalNorm	AR-22Y-0060DHT	P04792	HSPB1	Heat shock protein beta-1 (HspB1) (28 kDa heat shock protein) (Estrogen-regulated 24 kDa protein) (Heat shock 27 kDa protein) (HSP 27) (Stress-responsive protein 27) (SRP27)	0.916686	6.5E+08|7.7E+08|8.2E+08	2.24289e+09	7.47631e+08	3	1.9E+08|2.0E+08|1.9E+08	5.79991e+08	1.9333e+08	3	1	3.86712	0	MQ	q	I
1053	4104_ML_FinalNorm	AR-WT-0000DHT	P04792	HSPB1	Heat shock protein beta-1 (HspB1) (28 kDa heat shock protein) (Estrogen-regulated 24 kDa protein) (Heat shock 27 kDa protein) (HSP 27) (Stress-responsive protein 27) (SRP27)	0.916686	5.7E+07|5.9E+07|6.4E+07	1.7952e+08	5.98399e+07	3	1.9E+08|2.0E+08|1.9E+08	5.79991e+08	1.9333e+08	3	0.0153	0.309522	0.4586	MQ	q	I
1054	4104_ML_FinalNorm	AR-WT-0060DHT	P04792	HSPB1	Heat shock protein beta-1 (HspB1) (28 kDa heat shock protein) (Estrogen-regulated 24 kDa protein) (Heat shock 27 kDa protein) (HSP 27) (Stress-responsive protein 27) (SRP27)	0.916686	6.4E+07|6.5E+07|6.4E+07	1.92172e+08	6.40574e+07	3	1.9E+08|2.0E+08|1.9E+08	5.79991e+08	1.9333e+08	3	0.0162	0.331337	0.4512	MQ	q	I
1055	4104_ML_FinalNorm	AR-22Y-0000DHT	P04818	TYMS	Thymidylate synthase (TS) (TSase) (EC 2.1.1.45)	0.512664	1.4E+07|1.3E+07|7.3E+06	3.35712e+07	1.11904e+07	3	9.7E+06|8.8E+06|9.8E+06	2.82427e+07	9.41425e+06	3	0.2242	1.18867	0.2089	MQ	q	I
1056	4104_ML_FinalNorm	AR-WT-0000DHT	P04818	TYMS	Thymidylate synthase (TS) (TSase) (EC 2.1.1.45)	0.512664	1.1E+06|NAN|NAN	1.13336e+06	1.13336e+06	3	9.7E+06|8.8E+06|9.8E+06	2.82427e+07	9.41425e+06	3	0.0014	0.120388	0.5968	MQ	q	I
1057	4104_ML_FinalNorm	AR-WT-0060DHT	P04818	TYMS	Thymidylate synthase (TS) (TSase) (EC 2.1.1.45)	0.512664	6.3E+05|NAN|NAN	627586	627586	3	9.7E+06|8.8E+06|9.8E+06	2.82427e+07	9.41425e+06	3	0.0005	0.0666634	0.6148	MQ	q	I
1058	4104_ML_FinalNorm	AR-22Y-0000DHT	P04843	RPN1	Dolichyl-diphosphooligosaccharide--protein glycosyltransferase subunit 1 (Dolichyl-diphosphooligosaccharide--protein glycosyltransferase 67 kDa subunit) (Ribophorin I) (RPN-I) (Ribophorin-1)	0.920606	7.3E+07|9.7E+07|7.6E+07	2.45916e+08	8.19721e+07	3	3.4E+07|3.5E+07|3.4E+07	1.03236e+08	3.44119e+07	3	0.9999	2.38209	0	MQ	q	I
1059	4104_ML_FinalNorm	AR-22Y-0060DHT	P04843	RPN1	Dolichyl-diphosphooligosaccharide--protein glycosyltransferase subunit 1 (Dolichyl-diphosphooligosaccharide--protein glycosyltransferase 67 kDa subunit) (Ribophorin I) (RPN-I) (Ribophorin-1)	0.920606	1.4E+08|1.6E+08|1.6E+08	4.58524e+08	1.52841e+08	3	3.4E+07|3.5E+07|3.4E+07	1.03236e+08	3.44119e+07	3	1	4.44153	0	MQ	q	I
1060	4104_ML_FinalNorm	AR-WT-0000DHT	P04843	RPN1	Dolichyl-diphosphooligosaccharide--protein glycosyltransferase subunit 1 (Dolichyl-diphosphooligosaccharide--protein glycosyltransferase 67 kDa subunit) (Ribophorin I) (RPN-I) (Ribophorin-1)	0.920606	2.4E+07|2.4E+07|2.4E+07	7.20902e+07	2.40301e+07	3	3.4E+07|3.5E+07|3.4E+07	1.03236e+08	3.44119e+07	3	0.0147	0.698307	0.4626	MQ	q	I
1061	4104_ML_FinalNorm	AR-WT-0060DHT	P04843	RPN1	Dolichyl-diphosphooligosaccharide--protein glycosyltransferase subunit 1 (Dolichyl-diphosphooligosaccharide--protein glycosyltransferase 67 kDa subunit) (Ribophorin I) (RPN-I) (Ribophorin-1)	0.920606	2.9E+07|2.6E+07|3.0E+07	8.54246e+07	2.84749e+07	3	3.4E+07|3.5E+07|3.4E+07	1.03236e+08	3.44119e+07	3	0.0205	0.827472	0.4238	MQ	q	I
1062	4104_ML_FinalNorm	AR-22Y-0000DHT	P04844	RPN2	Dolichyl-diphosphooligosaccharide--protein glycosyltransferase subunit 2 (Dolichyl-diphosphooligosaccharide--protein glycosyltransferase 63 kDa subunit) (RIBIIR) (Ribophorin II) (RPN-II) (Ribophorin-2)	0.9048	1.5E+08|1.5E+08|1.5E+08	4.44119e+08	1.4804e+08	3	3.5E+07|3.4E+07|3.2E+07	1.01272e+08	3.37575e+07	3	1	4.38539	0	MQ	q	I
1063	4104_ML_FinalNorm	AR-22Y-0060DHT	P04844	RPN2	Dolichyl-diphosphooligosaccharide--protein glycosyltransferase subunit 2 (Dolichyl-diphosphooligosaccharide--protein glycosyltransferase 63 kDa subunit) (RIBIIR) (Ribophorin II) (RPN-II) (Ribophorin-2)	0.9048	5.2E+08|5.6E+08|5.7E+08	1.65257e+09	5.50858e+08	3	3.5E+07|3.4E+07|3.2E+07	1.01272e+08	3.37575e+07	3	1	16.3181	0	MQ	q	I
1064	4104_ML_FinalNorm	AR-WT-0000DHT	P04844	RPN2	Dolichyl-diphosphooligosaccharide--protein glycosyltransferase subunit 2 (Dolichyl-diphosphooligosaccharide--protein glycosyltransferase 63 kDa subunit) (RIBIIR) (Ribophorin II) (RPN-II) (Ribophorin-2)	0.9048	5.1E+07|4.1E+07|3.6E+07	1.28064e+08	4.2688e+07	3	3.5E+07|3.4E+07|3.2E+07	1.01272e+08	3.37575e+07	3	0.2517	1.26455	0.1998	MQ	q	I
1065	4104_ML_FinalNorm	AR-WT-0060DHT	P04844	RPN2	Dolichyl-diphosphooligosaccharide--protein glycosyltransferase subunit 2 (Dolichyl-diphosphooligosaccharide--protein glycosyltransferase 63 kDa subunit) (RIBIIR) (Ribophorin II) (RPN-II) (Ribophorin-2)	0.9048	7.5E+07|5.1E+07|3.5E+07	1.60173e+08	5.3391e+07	3	3.5E+07|3.4E+07|3.2E+07	1.01272e+08	3.37575e+07	3	0.546	1.58161	0.0866	MQ	q	I
1066	4104_ML_FinalNorm	AR-22Y-0000DHT	P04899	GNAI2	Guanine nucleotide-binding protein G(i) subunit alpha-2 (Adenylate cyclase-inhibiting G alpha protein)	0.874795	1.0E+07|1.2E+07|1.2E+07	3.43701e+07	1.14567e+07	3	3.8E+06|4.6E+06|3.3E+06	1.16482e+07	3.88272e+06	3	1	2.95069	0	MQ	q	I
1067	4104_ML_FinalNorm	AR-22Y-0060DHT	P04899	GNAI2	Guanine nucleotide-binding protein G(i) subunit alpha-2 (Adenylate cyclase-inhibiting G alpha protein)	0.874795	6.6E+06|7.6E+06|8.3E+06	2.25462e+07	7.51541e+06	3	3.8E+06|4.6E+06|3.3E+06	1.16482e+07	3.88272e+06	3	0.9784	1.9356	0.0011	MQ	q	I
1068	4104_ML_FinalNorm	AR-WT-0000DHT	P04899	GNAI2	Guanine nucleotide-binding protein G(i) subunit alpha-2 (Adenylate cyclase-inhibiting G alpha protein)	0.874795	2.0E+06|2.8E+06|2.8E+06	7.54353e+06	2.51451e+06	3	3.8E+06|4.6E+06|3.3E+06	1.16482e+07	3.88272e+06	3	0.012	0.647616	0.4827	MQ	q	I
1069	4104_ML_FinalNorm	AR-WT-0060DHT	P04899	GNAI2	Guanine nucleotide-binding protein G(i) subunit alpha-2 (Adenylate cyclase-inhibiting G alpha protein)	0.874795	4.9E+06|3.5E+06|5.0E+06	1.3391e+07	4.46367e+06	3	3.8E+06|4.6E+06|3.3E+06	1.16482e+07	3.88272e+06	3	0.0882	1.14962	0.2739	MQ	q	I
1070	4104_ML_FinalNorm	AR-22Y-0000DHT	P05023	ATP1A1	Sodium/potassium-transporting ATPase subunit alpha-1 (Na(+)/K(+) ATPase alpha-1 subunit) (EC 7.2.2.13) (Sodium pump subunit alpha-1)	0.950408	5.3E+06|9.4E+06|9.4E+06	2.41028e+07	8.03427e+06	3	7.5E+06|6.0E+06|5.6E+06	1.91123e+07	6.37078e+06	3	0.3776	1.26111	0.1239	MQ	q	I
1071	4104_ML_FinalNorm	AR-22Y-0060DHT	P05023	ATP1A1	Sodium/potassium-transporting ATPase subunit alpha-1 (Na(+)/K(+) ATPase alpha-1 subunit) (EC 7.2.2.13) (Sodium pump subunit alpha-1)	0.950408	9.9E+06|1.1E+07|1.0E+07	3.14681e+07	1.04894e+07	3	7.5E+06|6.0E+06|5.6E+06	1.91123e+07	6.37078e+06	3	0.8873	1.64648	0.0065	MQ	q	I
1072	4104_ML_FinalNorm	AR-WT-0000DHT	P05023	ATP1A1	Sodium/potassium-transporting ATPase subunit alpha-1 (Na(+)/K(+) ATPase alpha-1 subunit) (EC 7.2.2.13) (Sodium pump subunit alpha-1)	0.950408	5.5E+06|4.6E+06|5.6E+06	1.56981e+07	5.2327e+06	3	7.5E+06|6.0E+06|5.6E+06	1.91123e+07	6.37078e+06	3	0.0186	0.82136	0.4364	MQ	q	I
1073	4104_ML_FinalNorm	AR-WT-0060DHT	P05023	ATP1A1	Sodium/potassium-transporting ATPase subunit alpha-1 (Na(+)/K(+) ATPase alpha-1 subunit) (EC 7.2.2.13) (Sodium pump subunit alpha-1)	0.950408	6.3E+06|5.5E+06|6.0E+06	1.77984e+07	5.93279e+06	3	7.5E+06|6.0E+06|5.6E+06	1.91123e+07	6.37078e+06	3	0.0237	0.93125	0.4046	MQ	q	I
1074	4104_ML_FinalNorm	AR-22Y-0000DHT	P05060	CHGB	Secretogranin-1 (Chromogranin-B) (CgB) (Secretogranin I) (SgI) [Cleaved into: PE-11; GAWK peptide; CCB peptide]	0.425892	3.9E+06|9.6E+07|NAN	9.99233e+07	4.99616e+07	3	5.8E+03|5.9E+03|8.6E+03	20323.5	6774.51	3	0.6667	7374.95	0.0404	MQ	q	I
1075	4104_ML_FinalNorm	AR-22Y-0060DHT	P05060	CHGB	Secretogranin-1 (Chromogranin-B) (CgB) (Secretogranin I) (SgI) [Cleaved into: PE-11; GAWK peptide; CCB peptide]	0.425892	4.6E+07|NAN|NAN	4.5629e+07	4.5629e+07	3	5.8E+03|5.9E+03|8.6E+03	20323.5	6774.51	3	0.3333	6735.4	0.1476	MQ	q	I
1076	4104_ML_FinalNorm	AR-WT-0060DHT	P05060	CHGB	Secretogranin-1 (Chromogranin-B) (CgB) (Secretogranin I) (SgI) [Cleaved into: PE-11; GAWK peptide; CCB peptide]	0.425892	5.5E+06|NAN|5.5E+06	1.10018e+07	5.50092e+06	3	5.8E+03|5.9E+03|8.6E+03	20323.5	6774.51	3	0.6667	812.003	0.0404	MQ	q	I
1077	4104_ML_FinalNorm	AR-22Y-0000DHT	P05089	ARG1	Arginase-1 (EC 3.5.3.1) (Liver-type arginase) (Type I arginase)	0.871189	3.5E+06|5.2E+06|4.1E+06	1.29238e+07	4.30795e+06	3	2.5E+05|NAN|NAN	246831	246831	3	1	17.453	0	MQ	q	I
1078	4104_ML_FinalNorm	AR-22Y-0060DHT	P05089	ARG1	Arginase-1 (EC 3.5.3.1) (Liver-type arginase) (Type I arginase)	0.871189	7.5E+06|8.1E+06|3.8E+06	1.94131e+07	6.47104e+06	3	2.5E+05|NAN|NAN	246831	246831	3	1	26.2164	0	MQ	q	I
1079	4104_ML_FinalNorm	AR-WT-0000DHT	P05089	ARG1	Arginase-1 (EC 3.5.3.1) (Liver-type arginase) (Type I arginase)	0.871189	4.8E+05|NAN|2.7E+05	752350	376175	3	2.5E+05|NAN|NAN	246831	246831	3	0.3417	1.52401	0.1424	MQ	q	I
1080	4104_ML_FinalNorm	AR-22Y-0000DHT	P05109	S100A8	Protein S100-A8 (Calgranulin-A) (Calprotectin L1L subunit) (Cystic fibrosis antigen) (CFAG) (Leukocyte L1 complex light chain) (Migration inhibitory factor-related protein 8) (MRP-8) (p8) (S100 calcium-binding protein A8) (Urinary stone protein band A)	0.876909	1.4E+08|1.7E+08|1.7E+08	4.80175e+08	1.60058e+08	3	1.0E+07|2.2E+07|8.3E+06	4.0905e+07	1.3635e+07	3	1	11.7388	0	MQ	q	I
1081	4104_ML_FinalNorm	AR-22Y-0060DHT	P05109	S100A8	Protein S100-A8 (Calgranulin-A) (Calprotectin L1L subunit) (Cystic fibrosis antigen) (CFAG) (Leukocyte L1 complex light chain) (Migration inhibitory factor-related protein 8) (MRP-8) (p8) (S100 calcium-binding protein A8) (Urinary stone protein band A)	0.876909	1.4E+08|1.3E+08|2.0E+08	4.61227e+08	1.53742e+08	3	1.0E+07|2.2E+07|8.3E+06	4.0905e+07	1.3635e+07	3	0.9999	11.2756	0	MQ	q	I
1082	4104_ML_FinalNorm	AR-WT-0000DHT	P05109	S100A8	Protein S100-A8 (Calgranulin-A) (Calprotectin L1L subunit) (Cystic fibrosis antigen) (CFAG) (Leukocyte L1 complex light chain) (Migration inhibitory factor-related protein 8) (MRP-8) (p8) (S100 calcium-binding protein A8) (Urinary stone protein band A)	0.876909	9.3E+06|8.1E+06|1.1E+07	2.79847e+07	9.32823e+06	3	1.0E+07|2.2E+07|8.3E+06	4.0905e+07	1.3635e+07	3	0.0883	0.684139	0.2735	MQ	q	I
1083	4104_ML_FinalNorm	AR-WT-0060DHT	P05109	S100A8	Protein S100-A8 (Calgranulin-A) (Calprotectin L1L subunit) (Cystic fibrosis antigen) (CFAG) (Leukocyte L1 complex light chain) (Migration inhibitory factor-related protein 8) (MRP-8) (p8) (S100 calcium-binding protein A8) (Urinary stone protein band A)	0.876909	3.1E+06|4.7E+06|1.3E+07	2.10915e+07	7.03051e+06	3	1.0E+07|2.2E+07|8.3E+06	4.0905e+07	1.3635e+07	3	0.0701	0.515623	0.2926	MQ	q	I
1084	4104_ML_FinalNorm	AR-22Y-0000DHT	P05114	HMGN1	Non-histone chromosomal protein HMG-14 (High mobility group nucleosome-binding domain-containing protein 1)	0.879652	9.4E+06|3.5E+06|4.5E+06	1.74579e+07	5.81929e+06	3	NAN|4.7E+05|4.4E+05	906416	453208	3	1	12.8402	0	MQ	q	I
1085	4104_ML_FinalNorm	AR-22Y-0060DHT	P05114	HMGN1	Non-histone chromosomal protein HMG-14 (High mobility group nucleosome-binding domain-containing protein 1)	0.879652	7.1E+06|4.5E+06|4.2E+06	1.5716e+07	5.23867e+06	3	NAN|4.7E+05|4.4E+05	906416	453208	3	1	11.5591	0	MQ	q	I
1086	4104_ML_FinalNorm	AR-WT-0000DHT	P05114	HMGN1	Non-histone chromosomal protein HMG-14 (High mobility group nucleosome-binding domain-containing protein 1)	0.879652	1.1E+06|8.3E+05|6.3E+05	2.52051e+06	840170	3	NAN|4.7E+05|4.4E+05	906416	453208	3	0.8047	1.85383	0.0144	MQ	q	I
1087	4104_ML_FinalNorm	AR-WT-0060DHT	P05114	HMGN1	Non-histone chromosomal protein HMG-14 (High mobility group nucleosome-binding domain-containing protein 1)	0.879652	1.5E+06|1.1E+06|1.1E+06	3.68731e+06	1.2291e+06	3	NAN|4.7E+05|4.4E+05	906416	453208	3	1	2.71201	0	MQ	q	I
1088	4104_ML_FinalNorm	AR-22Y-0000DHT	P05141	SLC25A5	ADP/ATP translocase 2 (ADP,ATP carrier protein 2) (ADP,ATP carrier protein, fibroblast isoform) (Adenine nucleotide translocator 2) (ANT 2) (Solute carrier family 25 member 5) [Cleaved into: ADP/ATP translocase 2, N-terminally processed]	0.978575	1.5E+08|1.6E+08|1.7E+08	4.70393e+08	1.56798e+08	3	1.2E+08|1.2E+08|1.2E+08	3.5833e+08	1.19443e+08	3	0.1935	1.31274	0.2204	MQ	q	I
1089	4104_ML_FinalNorm	AR-22Y-0060DHT	P05141	SLC25A5	ADP/ATP translocase 2 (ADP,ATP carrier protein 2) (ADP,ATP carrier protein, fibroblast isoform) (Adenine nucleotide translocator 2) (ANT 2) (Solute carrier family 25 member 5) [Cleaved into: ADP/ATP translocase 2, N-terminally processed]	0.978575	1.3E+08|1.3E+08|1.4E+08	3.98564e+08	1.32855e+08	3	1.2E+08|1.2E+08|1.2E+08	3.5833e+08	1.19443e+08	3	0.0426	1.11228	0.3351	MQ	q	I
1090	4104_ML_FinalNorm	AR-WT-0000DHT	P05141	SLC25A5	ADP/ATP translocase 2 (ADP,ATP carrier protein 2) (ADP,ATP carrier protein, fibroblast isoform) (Adenine nucleotide translocator 2) (ANT 2) (Solute carrier family 25 member 5) [Cleaved into: ADP/ATP translocase 2, N-terminally processed]	0.978575	3.2E+07|3.5E+07|3.5E+07	1.02132e+08	3.40439e+07	3	1.2E+08|1.2E+08|1.2E+08	3.5833e+08	1.19443e+08	3	0.001	0.285022	0.6034	MQ	q	I
1091	4104_ML_FinalNorm	AR-WT-0060DHT	P05141	SLC25A5	ADP/ATP translocase 2 (ADP,ATP carrier protein 2) (ADP,ATP carrier protein, fibroblast isoform) (Adenine nucleotide translocator 2) (ANT 2) (Solute carrier family 25 member 5) [Cleaved into: ADP/ATP translocase 2, N-terminally processed]	0.978575	3.1E+07|3.6E+07|3.4E+07	1.00185e+08	3.33952e+07	3	1.2E+08|1.2E+08|1.2E+08	3.5833e+08	1.19443e+08	3	0.001	0.27959	0.6034	MQ	q	I
1092	4104_ML_FinalNorm	AR-22Y-0000DHT	P05161	ISG15	Ubiquitin-like protein ISG15 (Interferon-induced 15 kDa protein) (Interferon-induced 17 kDa protein) (IP17) (Ubiquitin cross-reactive protein) (hUCRP)	0.52965	1.6E+08|1.2E+08|1.5E+08	4.30201e+08	1.434e+08	3	1.4E+07|1.8E+07|1.8E+07	5.02381e+07	1.6746e+07	3	1	8.56325	0	MQ	q	I
1093	4104_ML_FinalNorm	AR-22Y-0060DHT	P05161	ISG15	Ubiquitin-like protein ISG15 (Interferon-induced 15 kDa protein) (Interferon-induced 17 kDa protein) (IP17) (Ubiquitin cross-reactive protein) (hUCRP)	0.52965	2.6E+07|2.0E+07|2.6E+07	7.16765e+07	2.38922e+07	3	1.4E+07|1.8E+07|1.8E+07	5.02381e+07	1.6746e+07	3	0.4287	1.42674	0.1095	MQ	q	I
1094	4104_ML_FinalNorm	AR-WT-0000DHT	P05161	ISG15	Ubiquitin-like protein ISG15 (Interferon-induced 15 kDa protein) (Interferon-induced 17 kDa protein) (IP17) (Ubiquitin cross-reactive protein) (hUCRP)	0.52965	2.1E+06|2.1E+06|1.8E+06	6.01575e+06	2.00525e+06	3	1.4E+07|1.8E+07|1.8E+07	5.02381e+07	1.6746e+07	3	0.0112	0.119745	0.4892	MQ	q	I
1095	4104_ML_FinalNorm	AR-WT-0060DHT	P05161	ISG15	Ubiquitin-like protein ISG15 (Interferon-induced 15 kDa protein) (Interferon-induced 17 kDa protein) (IP17) (Ubiquitin cross-reactive protein) (hUCRP)	0.52965	9.0E+05|1.5E+06|1.8E+06	4.20852e+06	1.40284e+06	3	1.4E+07|1.8E+07|1.8E+07	5.02381e+07	1.6746e+07	3	0.0086	0.0837715	0.509	MQ	q	I
1096	4104_ML_FinalNorm	AR-22Y-0000DHT	P05165	PCCA	Propionyl-CoA carboxylase alpha chain, mitochondrial (PCCase subunit alpha) (EC 6.4.1.3) (Propanoyl-CoA:carbon dioxide ligase subunit alpha)	0.964436	8.8E+08|7.5E+08|9.5E+08	2.57916e+09	8.5972e+08	3	2.5E+09|2.5E+09|2.5E+09	7.49653e+09	2.49884e+09	3	0.0019	0.344047	0.5895	MQ	q	I
1097	4104_ML_FinalNorm	AR-22Y-0060DHT	P05165	PCCA	Propionyl-CoA carboxylase alpha chain, mitochondrial (PCCase subunit alpha) (EC 6.4.1.3) (Propanoyl-CoA:carbon dioxide ligase subunit alpha)	0.964436	6.7E+08|7.9E+08|8.1E+08	2.26987e+09	7.56623e+08	3	2.5E+09|2.5E+09|2.5E+09	7.49653e+09	2.49884e+09	3	0.0013	0.302789	0.5984	MQ	q	I
1098	4104_ML_FinalNorm	AR-WT-0000DHT	P05165	PCCA	Propionyl-CoA carboxylase alpha chain, mitochondrial (PCCase subunit alpha) (EC 6.4.1.3) (Propanoyl-CoA:carbon dioxide ligase subunit alpha)	0.964436	2.0E+09|1.9E+09|2.0E+09	5.90529e+09	1.96843e+09	3	2.5E+09|2.5E+09|2.5E+09	7.49653e+09	2.49884e+09	3	0.0168	0.787736	0.4474	MQ	q	I
1099	4104_ML_FinalNorm	AR-WT-0060DHT	P05165	PCCA	Propionyl-CoA carboxylase alpha chain, mitochondrial (PCCase subunit alpha) (EC 6.4.1.3) (Propanoyl-CoA:carbon dioxide ligase subunit alpha)	0.964436	1.7E+09|1.7E+09|1.7E+09	5.16738e+09	1.72246e+09	3	2.5E+09|2.5E+09|2.5E+09	7.49653e+09	2.49884e+09	3	0.0126	0.689303	0.478	MQ	q	I
1100	4104_ML_FinalNorm	AR-22Y-0000DHT	P05166	PCCB	Propionyl-CoA carboxylase beta chain, mitochondrial (PCCase subunit beta) (EC 6.4.1.3) (Propanoyl-CoA:carbon dioxide ligase subunit beta)	0.963107	5.7E+08|4.1E+08|3.9E+08	1.37347e+09	4.57823e+08	3	2.1E+09|1.7E+09|1.7E+09	5.50455e+09	1.83485e+09	3	0.0007	0.249515	0.6098	MQ	q	I
1101	4104_ML_FinalNorm	AR-22Y-0060DHT	P05166	PCCB	Propionyl-CoA carboxylase beta chain, mitochondrial (PCCase subunit beta) (EC 6.4.1.3) (Propanoyl-CoA:carbon dioxide ligase subunit beta)	0.963107	5.2E+08|4.9E+08|4.1E+08	1.40966e+09	4.69886e+08	3	2.1E+09|1.7E+09|1.7E+09	5.50455e+09	1.83485e+09	3	0.0007	0.25609	0.6098	MQ	q	I
1102	4104_ML_FinalNorm	AR-WT-0000DHT	P05166	PCCB	Propionyl-CoA carboxylase beta chain, mitochondrial (PCCase subunit beta) (EC 6.4.1.3) (Propanoyl-CoA:carbon dioxide ligase subunit beta)	0.963107	1.3E+09|1.3E+09|1.2E+09	3.78381e+09	1.26127e+09	3	2.1E+09|1.7E+09|1.7E+09	5.50455e+09	1.83485e+09	3	0.0126	0.687396	0.478	MQ	q	I
1103	4104_ML_FinalNorm	AR-WT-0060DHT	P05166	PCCB	Propionyl-CoA carboxylase beta chain, mitochondrial (PCCase subunit beta) (EC 6.4.1.3) (Propanoyl-CoA:carbon dioxide ligase subunit beta)	0.963107	1.4E+09|1.4E+09|1.4E+09	4.11143e+09	1.37048e+09	3	2.1E+09|1.7E+09|1.7E+09	5.50455e+09	1.83485e+09	3	0.0151	0.746915	0.4608	MQ	q	I
1104	4104_ML_FinalNorm	AR-22Y-0000DHT	P05198	EIF2S1	Eukaryotic translation initiation factor 2 subunit 1 (Eukaryotic translation initiation factor 2 subunit alpha) (eIF-2-alpha) (eIF-2A) (eIF-2alpha)	0.912879	1.6E+08|1.0E+08|1.1E+08	3.69441e+08	1.23147e+08	3	1.3E+08|1.2E+08|1.2E+08	3.69006e+08	1.23002e+08	3	0.0552	1.00118	0.3135	MQ	q	I
1105	4104_ML_FinalNorm	AR-22Y-0060DHT	P05198	EIF2S1	Eukaryotic translation initiation factor 2 subunit 1 (Eukaryotic translation initiation factor 2 subunit alpha) (eIF-2-alpha) (eIF-2A) (eIF-2alpha)	0.912879	8.3E+07|1.2E+08|9.9E+07	3.04422e+08	1.01474e+08	3	1.3E+08|1.2E+08|1.2E+08	3.69006e+08	1.23002e+08	3	0.0186	0.824978	0.4364	MQ	q	I
1106	4104_ML_FinalNorm	AR-WT-0000DHT	P05198	EIF2S1	Eukaryotic translation initiation factor 2 subunit 1 (Eukaryotic translation initiation factor 2 subunit alpha) (eIF-2-alpha) (eIF-2A) (eIF-2alpha)	0.912879	4.2E+07|4.5E+07|5.0E+07	1.37578e+08	4.58592e+07	3	1.3E+08|1.2E+08|1.2E+08	3.69006e+08	1.23002e+08	3	0.0025	0.372833	0.579	MQ	q	I
1107	4104_ML_FinalNorm	AR-WT-0060DHT	P05198	EIF2S1	Eukaryotic translation initiation factor 2 subunit 1 (Eukaryotic translation initiation factor 2 subunit alpha) (eIF-2-alpha) (eIF-2A) (eIF-2alpha)	0.912879	3.9E+07|2.8E+07|3.1E+07	9.78644e+07	3.26215e+07	3	1.3E+08|1.2E+08|1.2E+08	3.69006e+08	1.23002e+08	3	0.0008	0.265211	0.6074	MQ	q	I
1108	4104_ML_FinalNorm	AR-22Y-0000DHT	P05386	RPLP1	60S acidic ribosomal protein P1 (Large ribosomal subunit protein P1)	0.957922	1.8E+08|1.4E+08|2.1E+08	5.27408e+08	1.75803e+08	3	1.1E+08|8.3E+07|1.1E+08	3.05235e+08	1.01745e+08	3	0.7497	1.72787	0.0201	MQ	q	I
1109	4104_ML_FinalNorm	AR-22Y-0060DHT	P05386	RPLP1	60S acidic ribosomal protein P1 (Large ribosomal subunit protein P1)	0.957922	2.2E+08|2.7E+08|1.8E+08	6.66659e+08	2.2222e+08	3	1.1E+08|8.3E+07|1.1E+08	3.05235e+08	1.01745e+08	3	0.9832	2.18408	0.0008	MQ	q	I
1110	4104_ML_FinalNorm	AR-WT-0000DHT	P05386	RPLP1	60S acidic ribosomal protein P1 (Large ribosomal subunit protein P1)	0.957922	2.1E+07|NAN|1.7E+07	3.79049e+07	1.89525e+07	3	1.1E+08|8.3E+07|1.1E+08	3.05235e+08	1.01745e+08	3	0.0022	0.186274	0.5847	MQ	q	I
1111	4104_ML_FinalNorm	AR-22Y-0000DHT	P05387	RPLP2	60S acidic ribosomal protein P2 (Large ribosomal subunit protein P2) (Renal carcinoma antigen NY-REN-44)	0.975923	2.1E+08|1.9E+08|1.9E+08	5.85643e+08	1.95214e+08	3	1.4E+08|1.2E+08|1.2E+08	3.75248e+08	1.25083e+08	3	0.7161	1.56068	0.0256	MQ	q	I
1112	4104_ML_FinalNorm	AR-22Y-0060DHT	P05387	RPLP2	60S acidic ribosomal protein P2 (Large ribosomal subunit protein P2) (Renal carcinoma antigen NY-REN-44)	0.975923	2.0E+08|2.4E+08|2.3E+08	6.75128e+08	2.25043e+08	3	1.4E+08|1.2E+08|1.2E+08	3.75248e+08	1.25083e+08	3	0.9575	1.79915	0.0023	MQ	q	I
1113	4104_ML_FinalNorm	AR-WT-0000DHT	P05387	RPLP2	60S acidic ribosomal protein P2 (Large ribosomal subunit protein P2) (Renal carcinoma antigen NY-REN-44)	0.975923	1.9E+07|1.7E+07|1.9E+07	5.54269e+07	1.84756e+07	3	1.4E+08|1.2E+08|1.2E+08	3.75248e+08	1.25083e+08	3	0.0049	0.147707	0.5472	MQ	q	I
1114	4104_ML_FinalNorm	AR-WT-0060DHT	P05387	RPLP2	60S acidic ribosomal protein P2 (Large ribosomal subunit protein P2) (Renal carcinoma antigen NY-REN-44)	0.975923	1.6E+07|1.7E+07|1.7E+07	4.9532e+07	1.65107e+07	3	1.4E+08|1.2E+08|1.2E+08	3.75248e+08	1.25083e+08	3	0.0042	0.131998	0.5547	MQ	q	I
1115	4104_ML_FinalNorm	AR-22Y-0000DHT	P05388	RPLP0	60S acidic ribosomal protein P0 (60S ribosomal protein L10E) (Large ribosomal subunit protein uL10)	0.976559	1.4E+08|1.3E+08|1.5E+08	4.11132e+08	1.37044e+08	3	9.1E+07|8.3E+07|8.8E+07	2.61689e+08	8.72298e+07	3	0.7155	1.57107	0.0258	MQ	q	I
1116	4104_ML_FinalNorm	AR-22Y-0060DHT	P05388	RPLP0	60S acidic ribosomal protein P0 (60S ribosomal protein L10E) (Large ribosomal subunit protein uL10)	0.976559	1.6E+08|1.8E+08|1.8E+08	5.18694e+08	1.72898e+08	3	9.1E+07|8.3E+07|8.8E+07	2.61689e+08	8.72298e+07	3	0.9979	1.9821	0.0001	MQ	q	I
1117	4104_ML_FinalNorm	AR-WT-0000DHT	P05388	RPLP0	60S acidic ribosomal protein P0 (60S ribosomal protein L10E) (Large ribosomal subunit protein uL10)	0.976559	2.0E+07|1.7E+07|1.8E+07	5.5097e+07	1.83657e+07	3	9.1E+07|8.3E+07|8.8E+07	2.61689e+08	8.72298e+07	3	0.0056	0.210544	0.5387	MQ	q	I
1118	4104_ML_FinalNorm	AR-WT-0060DHT	P05388	RPLP0	60S acidic ribosomal protein P0 (60S ribosomal protein L10E) (Large ribosomal subunit protein uL10)	0.976559	1.6E+07|1.5E+07|1.4E+07	4.52675e+07	1.50892e+07	3	9.1E+07|8.3E+07|8.8E+07	2.61689e+08	8.72298e+07	3	0.004	0.172982	0.5576	MQ	q	I
1119	4104_ML_FinalNorm	AR-22Y-0000DHT	P05412	JUN	Transcription factor AP-1 (Activator protein 1) (AP1) (Proto-oncogene c-Jun) (V-jun avian sarcoma virus 17 oncogene homolog) (p39)	0.5453	6.8E+06|6.9E+06|2.2E+06	1.58716e+07	5.29053e+06	3	4.7E+06|3.4E+06|4.2E+06	1.22515e+07	4.08383e+06	3	0.5929	1.29548	0.0768	MQ	q	I
1120	4104_ML_FinalNorm	AR-22Y-0060DHT	P05412	JUN	Transcription factor AP-1 (Activator protein 1) (AP1) (Proto-oncogene c-Jun) (V-jun avian sarcoma virus 17 oncogene homolog) (p39)	0.5453	2.9E+06|6.7E+06|NAN	9.66494e+06	4.83247e+06	3	4.7E+06|3.4E+06|4.2E+06	1.22515e+07	4.08383e+06	3	0.2911	1.18332	0.1863	MQ	q	I
1121	4104_ML_FinalNorm	AR-WT-0000DHT	P05412	JUN	Transcription factor AP-1 (Activator protein 1) (AP1) (Proto-oncogene c-Jun) (V-jun avian sarcoma virus 17 oncogene homolog) (p39)	0.5453	1.7E+07|1.9E+07|2.0E+07	5.5341e+07	1.8447e+07	3	4.7E+06|3.4E+06|4.2E+06	1.22515e+07	4.08383e+06	3	1	4.51708	0	MQ	q	I
1122	4104_ML_FinalNorm	AR-WT-0060DHT	P05412	JUN	Transcription factor AP-1 (Activator protein 1) (AP1) (Proto-oncogene c-Jun) (V-jun avian sarcoma virus 17 oncogene homolog) (p39)	0.5453	1.9E+08|1.9E+08|1.8E+08	5.59649e+08	1.8655e+08	3	4.7E+06|3.4E+06|4.2E+06	1.22515e+07	4.08383e+06	3	1	45.68	0	MQ	q	I
1123	4104_ML_FinalNorm	AR-22Y-0000DHT	P05455	SSB	Lupus La protein (La autoantigen) (La ribonucleoprotein) (Sjoegren syndrome type B antigen) (SS-B)	0.927943	6.3E+06|4.3E+06|5.1E+06	1.56865e+07	5.22885e+06	3	NAN|NAN|4.6E+06	4.56811e+06	4.56811e+06	3	0.2044	1.14464	0.2167	MQ	q	I
1124	4104_ML_FinalNorm	AR-WT-0000DHT	P05455	SSB	Lupus La protein (La autoantigen) (La ribonucleoprotein) (Sjoegren syndrome type B antigen) (SS-B)	0.927943	1.3E+06|NAN|NAN	1.33841e+06	1.33841e+06	3	NAN|NAN|4.6E+06	4.56811e+06	4.56811e+06	3	0.0005	0.292991	0.6148	MQ	q	I
1125	4104_ML_FinalNorm	AR-WT-0060DHT	P05455	SSB	Lupus La protein (La autoantigen) (La ribonucleoprotein) (Sjoegren syndrome type B antigen) (SS-B)	0.927943	NAN|1.2E+06|1.1E+06	2.33718e+06	1.16859e+06	3	NAN|NAN|4.6E+06	4.56811e+06	4.56811e+06	3	0.0006	0.255815	0.6122	MQ	q	I
1126	4104_ML_FinalNorm	AR-22Y-0000DHT	P05556	ITGB1	Integrin beta-1 (Fibronectin receptor subunit beta) (Glycoprotein IIa) (GPIIA) (VLA-4 subunit beta) (CD antigen CD29)	0.777552	NAN|6.1E+06|4.2E+06	1.0254e+07	5.12699e+06	3	2.1E+06|2.3E+06|2.3E+06	6.57313e+06	2.19104e+06	3	0.6657	2.33998	0.0603	MQ	q	I
1127	4104_ML_FinalNorm	AR-22Y-0060DHT	P05556	ITGB1	Integrin beta-1 (Fibronectin receptor subunit beta) (Glycoprotein IIa) (GPIIA) (VLA-4 subunit beta) (CD antigen CD29)	0.777552	3.3E+06|4.5E+06|6.8E+06	1.46494e+07	4.88313e+06	3	2.1E+06|2.3E+06|2.3E+06	6.57313e+06	2.19104e+06	3	0.8756	2.22868	0.0074	MQ	q	I
1128	4104_ML_FinalNorm	AR-WT-0000DHT	P05556	ITGB1	Integrin beta-1 (Fibronectin receptor subunit beta) (Glycoprotein IIa) (GPIIA) (VLA-4 subunit beta) (CD antigen CD29)	0.777552	NAN|3.0E+06|2.6E+06	5.59639e+06	2.79819e+06	3	2.1E+06|2.3E+06|2.3E+06	6.57313e+06	2.19104e+06	3	0.1108	1.27711	0.2583	MQ	q	I
1129	4104_ML_FinalNorm	AR-WT-0060DHT	P05556	ITGB1	Integrin beta-1 (Fibronectin receptor subunit beta) (Glycoprotein IIa) (GPIIA) (VLA-4 subunit beta) (CD antigen CD29)	0.777552	3.2E+06|9.5E+05|NAN	4.16554e+06	2.08277e+06	3	2.1E+06|2.3E+06|2.3E+06	6.57313e+06	2.19104e+06	3	0.1727	0.950585	0.2286	MQ	q	I
1130	4104_ML_FinalNorm	AR-22Y-0000DHT	P05783	KRT18	Keratin, type I cytoskeletal 18 (Cell proliferation-inducing gene 46 protein) (Cytokeratin-18) (CK-18) (Keratin-18) (K18)	0.986892	2.0E+08|2.2E+08|2.6E+08	6.8839e+08	2.29463e+08	3	1.9E+08|2.1E+08|1.8E+08	5.72156e+08	1.90719e+08	3	0.1264	1.20315	0.2509	MQ	q	I
1131	4104_ML_FinalNorm	AR-22Y-0060DHT	P05783	KRT18	Keratin, type I cytoskeletal 18 (Cell proliferation-inducing gene 46 protein) (Cytokeratin-18) (CK-18) (Keratin-18) (K18)	0.986892	2.2E+08|3.2E+08|2.5E+08	7.84532e+08	2.61511e+08	3	1.9E+08|2.1E+08|1.8E+08	5.72156e+08	1.90719e+08	3	0.3771	1.37119	0.1244	MQ	q	I
1132	4104_ML_FinalNorm	AR-WT-0000DHT	P05783	KRT18	Keratin, type I cytoskeletal 18 (Cell proliferation-inducing gene 46 protein) (Cytokeratin-18) (CK-18) (Keratin-18) (K18)	0.986892	1.1E+08|9.2E+07|9.2E+07	2.96034e+08	9.86781e+07	3	1.9E+08|2.1E+08|1.8E+08	5.72156e+08	1.90719e+08	3	0.0063	0.517401	0.5322	MQ	q	I
1133	4104_ML_FinalNorm	AR-WT-0060DHT	P05783	KRT18	Keratin, type I cytoskeletal 18 (Cell proliferation-inducing gene 46 protein) (Cytokeratin-18) (CK-18) (Keratin-18) (K18)	0.986892	9.9E+07|9.4E+07|1.2E+08	3.10339e+08	1.03446e+08	3	1.9E+08|2.1E+08|1.8E+08	5.72156e+08	1.90719e+08	3	0.0071	0.542402	0.5248	MQ	q	I
1134	4104_ML_FinalNorm	AR-22Y-0000DHT	P06400	RB1	Retinoblastoma-associated protein (p105-Rb) (p110-RB1) (pRb) (Rb) (pp110)	0.125442	1.7E+08|1.2E+08|1.8E+08	4.65345e+08	1.55115e+08	3	6.4E+03|9.0E+03|7.5E+03	22945.9	7648.62	3	1	20280.1	0	MQ	q	I
1135	4104_ML_FinalNorm	AR-22Y-0060DHT	P06400	RB1	Retinoblastoma-associated protein (p105-Rb) (p110-RB1) (pRb) (Rb) (pp110)	0.125442	NAN|7.0E+07|9.5E+07	1.65036e+08	8.25178e+07	3	6.4E+03|9.0E+03|7.5E+03	22945.9	7648.62	3	0.6667	10788.6	0.0404	MQ	q	I
1136	4104_ML_FinalNorm	AR-WT-0060DHT	P06400	RB1	Retinoblastoma-associated protein (p105-Rb) (p110-RB1) (pRb) (Rb) (pp110)	0.125442	6.7E+06|NAN|8.7E+06	1.54184e+07	7.70918e+06	3	6.4E+03|9.0E+03|7.5E+03	22945.9	7648.62	3	0.6667	1007.92	0.0404	MQ	q	I
1137	4104_ML_FinalNorm	AR-22Y-0000DHT	P06454	PTMA	Prothymosin alpha [Cleaved into: Prothymosin alpha, N-terminally processed; Thymosin alpha-1]	0.899692	7.0E+06|3.4E+06|3.8E+06	1.41975e+07	4.73249e+06	3	1.8E+06|1.2E+06|1.0E+06	4.0278e+06	1.3426e+06	3	0.9925	3.52487	0.0003	MQ	q	I
1138	4104_ML_FinalNorm	AR-WT-0000DHT	P06454	PTMA	Prothymosin alpha [Cleaved into: Prothymosin alpha, N-terminally processed; Thymosin alpha-1]	0.899692	2.8E+05|4.0E+05|2.8E+05	963180	321060	3	1.8E+06|1.2E+06|1.0E+06	4.0278e+06	1.3426e+06	3	0.0134	0.239133	0.4728	MQ	q	I
1139	4104_ML_FinalNorm	AR-WT-0060DHT	P06454	PTMA	Prothymosin alpha [Cleaved into: Prothymosin alpha, N-terminally processed; Thymosin alpha-1]	0.899692	2.2E+06|8.6E+05|5.6E+05	3.6074e+06	1.20247e+06	3	1.8E+06|1.2E+06|1.0E+06	4.0278e+06	1.3426e+06	3	0.14	0.895624	0.2453	MQ	q	I
1140	4104_ML_FinalNorm	AR-22Y-0000DHT	P06493	CDK1	Cyclin-dependent kinase 1 (CDK1) (EC 2.7.11.22) (EC 2.7.11.23) (Cell division control protein 2 homolog) (Cell division protein kinase 1) (p34 protein kinase)	0.916231	1.5E+07|3.8E+06|1.1E+07	2.96426e+07	9.88086e+06	3	4.6E+07|4.5E+07|4.9E+07	1.4011e+08	4.67033e+07	3	0.0018	0.211567	0.5908	MQ	q	I
1141	4104_ML_FinalNorm	AR-22Y-0060DHT	P06493	CDK1	Cyclin-dependent kinase 1 (CDK1) (EC 2.7.11.22) (EC 2.7.11.23) (Cell division control protein 2 homolog) (Cell division protein kinase 1) (p34 protein kinase)	0.916231	4.2E+07|1.2E+07|1.1E+07	6.45137e+07	2.15046e+07	3	4.6E+07|4.5E+07|4.9E+07	1.4011e+08	4.67033e+07	3	0.0102	0.460451	0.4962	MQ	q	I
1142	4104_ML_FinalNorm	AR-WT-0000DHT	P06493	CDK1	Cyclin-dependent kinase 1 (CDK1) (EC 2.7.11.22) (EC 2.7.11.23) (Cell division control protein 2 homolog) (Cell division protein kinase 1) (p34 protein kinase)	0.916231	4.1E+06|4.9E+06|4.1E+06	1.313e+07	4.37666e+06	3	4.6E+07|4.5E+07|4.9E+07	1.4011e+08	4.67033e+07	3	0.0001	0.0937121	0.6286	MQ	q	I
1143	4104_ML_FinalNorm	AR-WT-0060DHT	P06493	CDK1	Cyclin-dependent kinase 1 (CDK1) (EC 2.7.11.22) (EC 2.7.11.23) (Cell division control protein 2 homolog) (Cell division protein kinase 1) (p34 protein kinase)	0.916231	3.8E+06|3.8E+06|1.5E+06	9.02645e+06	3.00882e+06	3	4.6E+07|4.5E+07|4.9E+07	1.4011e+08	4.67033e+07	3	0	0.0644241	0.6339	MQ	q	I
1144	4104_ML_FinalNorm	AR-22Y-0000DHT	P06576	ATP5F1B	ATP synthase subunit beta, mitochondrial (EC 7.1.2.2) (ATP synthase F1 subunit beta)	0.980324	1.6E+08|1.9E+08|2.2E+08	5.80414e+08	1.93471e+08	3	1.0E+08|9.3E+07|8.6E+07	2.80723e+08	9.35744e+07	3	0.9918	2.06757	0.0003	MQ	q	I
1145	4104_ML_FinalNorm	AR-22Y-0060DHT	P06576	ATP5F1B	ATP synthase subunit beta, mitochondrial (EC 7.1.2.2) (ATP synthase F1 subunit beta)	0.980324	1.1E+08|1.3E+08|1.1E+08	3.47927e+08	1.15976e+08	3	1.0E+08|9.3E+07|8.6E+07	2.80723e+08	9.35744e+07	3	0.1503	1.23939	0.2396	MQ	q	I
1146	4104_ML_FinalNorm	AR-WT-0000DHT	P06576	ATP5F1B	ATP synthase subunit beta, mitochondrial (EC 7.1.2.2) (ATP synthase F1 subunit beta)	0.980324	2.8E+07|2.4E+07|3.0E+07	8.13136e+07	2.71045e+07	3	1.0E+08|9.3E+07|8.6E+07	2.80723e+08	9.35744e+07	3	0.0045	0.289658	0.5521	MQ	q	I
1147	4104_ML_FinalNorm	AR-WT-0060DHT	P06576	ATP5F1B	ATP synthase subunit beta, mitochondrial (EC 7.1.2.2) (ATP synthase F1 subunit beta)	0.980324	2.4E+07|2.1E+07|2.3E+07	6.90712e+07	2.30237e+07	3	1.0E+08|9.3E+07|8.6E+07	2.80723e+08	9.35744e+07	3	0.0031	0.246047	0.5692	MQ	q	I
1148	4104_ML_FinalNorm	AR-22Y-0000DHT	P06702	S100A9	Protein S100-A9 (Calgranulin-B) (Calprotectin L1H subunit) (Leukocyte L1 complex heavy chain) (Migration inhibitory factor-related protein 14) (MRP-14) (p14) (S100 calcium-binding protein A9)	0.890753	3.8E+08|4.4E+08|4.5E+08	1.2696e+09	4.23201e+08	3	8.5E+06|8.1E+06|7.7E+06	2.42586e+07	8.08618e+06	3	1	52.3364	0	MQ	q	I
1149	4104_ML_FinalNorm	AR-22Y-0060DHT	P06702	S100A9	Protein S100-A9 (Calgranulin-B) (Calprotectin L1H subunit) (Leukocyte L1 complex heavy chain) (Migration inhibitory factor-related protein 14) (MRP-14) (p14) (S100 calcium-binding protein A9)	0.890753	3.7E+08|3.7E+08|3.5E+08	1.08704e+09	3.62347e+08	3	8.5E+06|8.1E+06|7.7E+06	2.42586e+07	8.08618e+06	3	1	44.8107	0	MQ	q	I
1150	4104_ML_FinalNorm	AR-WT-0000DHT	P06702	S100A9	Protein S100-A9 (Calgranulin-B) (Calprotectin L1H subunit) (Leukocyte L1 complex heavy chain) (Migration inhibitory factor-related protein 14) (MRP-14) (p14) (S100 calcium-binding protein A9)	0.890753	1.8E+07|1.9E+07|1.1E+07	4.75953e+07	1.58651e+07	3	8.5E+06|8.1E+06|7.7E+06	2.42586e+07	8.08618e+06	3	0.7111	1.962	0.027	MQ	q	I
1151	4104_ML_FinalNorm	AR-WT-0060DHT	P06702	S100A9	Protein S100-A9 (Calgranulin-B) (Calprotectin L1H subunit) (Leukocyte L1 complex heavy chain) (Migration inhibitory factor-related protein 14) (MRP-14) (p14) (S100 calcium-binding protein A9)	0.890753	9.1E+06|3.3E+06|6.0E+06	1.83371e+07	6.11236e+06	3	8.5E+06|8.1E+06|7.7E+06	2.42586e+07	8.08618e+06	3	0.0235	0.755902	0.4055	MQ	q	I
1152	4104_ML_FinalNorm	AR-22Y-0000DHT	P06703	S100A6	Protein S100-A6 (Calcyclin) (Growth factor-inducible protein 2A9) (MLN 4) (Prolactin receptor-associated protein) (PRA) (S100 calcium-binding protein A6)	0.787993	2.6E+08|2.2E+08|2.1E+08	7.0108e+08	2.33693e+08	3	2.3E+07|8.1E+07|8.9E+07	1.92622e+08	6.42073e+07	3	0.7565	3.63967	0.0194	MQ	q	I
1153	4104_ML_FinalNorm	AR-22Y-0060DHT	P06703	S100A6	Protein S100-A6 (Calcyclin) (Growth factor-inducible protein 2A9) (MLN 4) (Prolactin receptor-associated protein) (PRA) (S100 calcium-binding protein A6)	0.787993	1.7E+08|1.8E+08|1.7E+08	5.1736e+08	1.72453e+08	3	2.3E+07|8.1E+07|8.9E+07	1.92622e+08	6.42073e+07	3	0.5934	2.68588	0.0767	MQ	q	I
1154	4104_ML_FinalNorm	AR-WT-0000DHT	P06703	S100A6	Protein S100-A6 (Calcyclin) (Growth factor-inducible protein 2A9) (MLN 4) (Prolactin receptor-associated protein) (PRA) (S100 calcium-binding protein A6)	0.787993	1.1E+08|9.7E+07|9.5E+07	2.96391e+08	9.87971e+07	3	2.3E+07|8.1E+07|8.9E+07	1.92622e+08	6.42073e+07	3	0.2893	1.53872	0.1869	MQ	q	I
1155	4104_ML_FinalNorm	AR-WT-0060DHT	P06703	S100A6	Protein S100-A6 (Calcyclin) (Growth factor-inducible protein 2A9) (MLN 4) (Prolactin receptor-associated protein) (PRA) (S100 calcium-binding protein A6)	0.787993	1.6E+08|6.9E+07|1.3E+08	3.57433e+08	1.19144e+08	3	2.3E+07|8.1E+07|8.9E+07	1.92622e+08	6.42073e+07	3	0.3784	1.85562	0.1234	MQ	q	I
1156	4104_ML_FinalNorm	AR-22Y-0000DHT	P06730	EIF4E	Eukaryotic translation initiation factor 4E (eIF-4E) (eIF4E) (eIF-4F 25 kDa subunit) (mRNA cap-binding protein)	0.728486	NAN|8.1E+06|4.0E+06	1.20215e+07	6.01073e+06	3	1.6E+07|1.8E+07|1.4E+07	4.70589e+07	1.56863e+07	3	0.0023	0.383183	0.5825	MQ	q	I
1157	4104_ML_FinalNorm	AR-22Y-0060DHT	P06730	EIF4E	Eukaryotic translation initiation factor 4E (eIF-4E) (eIF4E) (eIF-4F 25 kDa subunit) (mRNA cap-binding protein)	0.728486	2.2E+06|2.5E+06|3.6E+06	8.33018e+06	2.77673e+06	3	1.6E+07|1.8E+07|1.4E+07	4.70589e+07	1.56863e+07	3	0.0002	0.177016	0.6234	MQ	q	I
1158	4104_ML_FinalNorm	AR-WT-0000DHT	P06730	EIF4E	Eukaryotic translation initiation factor 4E (eIF-4E) (eIF4E) (eIF-4F 25 kDa subunit) (mRNA cap-binding protein)	0.728486	1.5E+07|1.3E+07|1.2E+07	4.0416e+07	1.3472e+07	3	1.6E+07|1.8E+07|1.4E+07	4.70589e+07	1.56863e+07	3	0.0202	0.858837	0.426	MQ	q	I
1159	4104_ML_FinalNorm	AR-WT-0060DHT	P06730	EIF4E	Eukaryotic translation initiation factor 4E (eIF-4E) (eIF4E) (eIF-4F 25 kDa subunit) (mRNA cap-binding protein)	0.728486	9.5E+06|1.0E+07|1.3E+07	3.32515e+07	1.10838e+07	3	1.6E+07|1.8E+07|1.4E+07	4.70589e+07	1.56863e+07	3	0.0136	0.706593	0.4707	MQ	q	I
1160	4104_ML_FinalNorm	AR-22Y-0000DHT	P06733	ENO1	Alpha-enolase (EC 4.2.1.11) (2-phospho-D-glycerate hydro-lyase) (C-myc promoter-binding protein) (Enolase 1) (MBP-1) (MPB-1) (Non-neural enolase) (NNE) (Phosphopyruvate hydratase) (Plasminogen-binding protein)	0.988038	6.5E+07|6.8E+07|5.5E+07	1.87414e+08	6.24714e+07	3	1.9E+07|1.5E+07|1.6E+07	4.98886e+07	1.66295e+07	3	1	3.75665	0	MQ	q	I
1161	4104_ML_FinalNorm	AR-22Y-0060DHT	P06733	ENO1	Alpha-enolase (EC 4.2.1.11) (2-phospho-D-glycerate hydro-lyase) (C-myc promoter-binding protein) (Enolase 1) (MBP-1) (MPB-1) (Non-neural enolase) (NNE) (Phosphopyruvate hydratase) (Plasminogen-binding protein)	0.988038	3.4E+07|3.4E+07|3.8E+07	1.06267e+08	3.54222e+07	3	1.9E+07|1.5E+07|1.6E+07	4.98886e+07	1.66295e+07	3	0.9998	2.13008	0	MQ	q	I
1162	4104_ML_FinalNorm	AR-WT-0000DHT	P06733	ENO1	Alpha-enolase (EC 4.2.1.11) (2-phospho-D-glycerate hydro-lyase) (C-myc promoter-binding protein) (Enolase 1) (MBP-1) (MPB-1) (Non-neural enolase) (NNE) (Phosphopyruvate hydratase) (Plasminogen-binding protein)	0.988038	6.7E+06|8.6E+06|8.7E+06	2.39644e+07	7.98812e+06	3	1.9E+07|1.5E+07|1.6E+07	4.98886e+07	1.66295e+07	3	0.0136	0.480357	0.4707	MQ	q	I
1163	4104_ML_FinalNorm	AR-WT-0060DHT	P06733	ENO1	Alpha-enolase (EC 4.2.1.11) (2-phospho-D-glycerate hydro-lyase) (C-myc promoter-binding protein) (Enolase 1) (MBP-1) (MPB-1) (Non-neural enolase) (NNE) (Phosphopyruvate hydratase) (Plasminogen-binding protein)	0.988038	6.5E+06|5.2E+06|8.4E+06	2.01253e+07	6.70842e+06	3	1.9E+07|1.5E+07|1.6E+07	4.98886e+07	1.66295e+07	3	0.0103	0.403404	0.4956	MQ	q	I
1164	4104_ML_FinalNorm	AR-22Y-0000DHT	P06737	PYGL	Glycogen phosphorylase, liver form (EC 2.4.1.1)	0.760985	1.6E+08|1.4E+08|1.7E+08	4.68962e+08	1.56321e+08	3	1.5E+08|1.5E+08|1.6E+08	4.53205e+08	1.51068e+08	3	0.0306	1.03477	0.3702	MQ	q	I
1165	4104_ML_FinalNorm	AR-22Y-0060DHT	P06737	PYGL	Glycogen phosphorylase, liver form (EC 2.4.1.1)	0.760985	1.4E+08|1.4E+08|1.6E+08	4.48018e+08	1.49339e+08	3	1.5E+08|1.5E+08|1.6E+08	4.53205e+08	1.51068e+08	3	0.0278	0.988556	0.3832	MQ	q	I
1166	4104_ML_FinalNorm	AR-WT-0000DHT	P06737	PYGL	Glycogen phosphorylase, liver form (EC 2.4.1.1)	0.760985	5.4E+07|5.1E+07|4.7E+07	1.52424e+08	5.08078e+07	3	1.5E+08|1.5E+08|1.6E+08	4.53205e+08	1.51068e+08	3	0.0018	0.336324	0.5908	MQ	q	I
1167	4104_ML_FinalNorm	AR-WT-0060DHT	P06737	PYGL	Glycogen phosphorylase, liver form (EC 2.4.1.1)	0.760985	4.8E+07|4.5E+07|4.4E+07	1.37435e+08	4.58118e+07	3	1.5E+08|1.5E+08|1.6E+08	4.53205e+08	1.51068e+08	3	0.0013	0.303252	0.5984	MQ	q	I
1168	4104_ML_FinalNorm	AR-22Y-0000DHT	P06748	NPM1	Nucleophosmin (NPM) (Nucleolar phosphoprotein B23) (Nucleolar protein NO38) (Numatrin)	0.991907	9.5E+07|5.3E+07|1.2E+08	2.65247e+08	8.84156e+07	3	2.7E+08|2.2E+08|2.5E+08	7.45939e+08	2.48646e+08	3	0.0106	0.355588	0.4931	MQ	q	I
1169	4104_ML_FinalNorm	AR-22Y-0060DHT	P06748	NPM1	Nucleophosmin (NPM) (Nucleolar phosphoprotein B23) (Nucleolar protein NO38) (Numatrin)	0.991907	6.1E+07|1.9E+08|1.9E+08	4.47424e+08	1.49141e+08	3	2.7E+08|2.2E+08|2.5E+08	7.45939e+08	2.48646e+08	3	0.0205	0.599813	0.4238	MQ	q	I
1170	4104_ML_FinalNorm	AR-WT-0000DHT	P06748	NPM1	Nucleophosmin (NPM) (Nucleolar phosphoprotein B23) (Nucleolar protein NO38) (Numatrin)	0.991907	2.1E+07|1.7E+07|6.2E+06	4.43621e+07	1.47874e+07	3	2.7E+08|2.2E+08|2.5E+08	7.45939e+08	2.48646e+08	3	0.0003	0.0594715	0.6208	MQ	q	I
1171	4104_ML_FinalNorm	AR-WT-0060DHT	P06748	NPM1	Nucleophosmin (NPM) (Nucleolar phosphoprotein B23) (Nucleolar protein NO38) (Numatrin)	0.991907	3.0E+07|1.2E+07|2.9E+07	7.15738e+07	2.38579e+07	3	2.7E+08|2.2E+08|2.5E+08	7.45939e+08	2.48646e+08	3	0.001	0.0959513	0.6034	MQ	q	I
1172	4104_ML_FinalNorm	AR-22Y-0000DHT	P07195	LDHB	L-lactate dehydrogenase B chain (LDH-B) (EC 1.1.1.27) (LDH heart subunit) (LDH-H) (Renal carcinoma antigen NY-REN-46)	0.96747	1.5E+08|1.7E+08|1.5E+08	4.68211e+08	1.5607e+08	3	1.9E+07|2.0E+07|2.2E+07	6.18037e+07	2.06012e+07	3	1	7.57578	0	MQ	q	I
1173	4104_ML_FinalNorm	AR-22Y-0060DHT	P07195	LDHB	L-lactate dehydrogenase B chain (LDH-B) (EC 1.1.1.27) (LDH heart subunit) (LDH-H) (Renal carcinoma antigen NY-REN-46)	0.96747	2.4E+07|1.9E+07|2.2E+07	6.48787e+07	2.16262e+07	3	1.9E+07|2.0E+07|2.2E+07	6.18037e+07	2.06012e+07	3	0.044	1.04976	0.3313	MQ	q	I
1174	4104_ML_FinalNorm	AR-WT-0000DHT	P07195	LDHB	L-lactate dehydrogenase B chain (LDH-B) (EC 1.1.1.27) (LDH heart subunit) (LDH-H) (Renal carcinoma antigen NY-REN-46)	0.96747	5.7E+06|7.5E+06|5.1E+06	1.8302e+07	6.10066e+06	3	1.9E+07|2.0E+07|2.2E+07	6.18037e+07	2.06012e+07	3	0.014	0.296131	0.4675	MQ	q	I
1175	4104_ML_FinalNorm	AR-WT-0060DHT	P07195	LDHB	L-lactate dehydrogenase B chain (LDH-B) (EC 1.1.1.27) (LDH heart subunit) (LDH-H) (Renal carcinoma antigen NY-REN-46)	0.96747	4.9E+06|6.4E+06|5.6E+06	1.68706e+07	5.62354e+06	3	1.9E+07|2.0E+07|2.2E+07	6.18037e+07	2.06012e+07	3	0.013	0.272971	0.4752	MQ	q	I
1176	4104_ML_FinalNorm	AR-22Y-0000DHT	P07196	NEFL	Neurofilament light polypeptide (NF-L) (68 kDa neurofilament protein) (Neurofilament triplet L protein)	0	1.2E+07|1.2E+07|3.5E+06	2.76301e+07	9.21003e+06	3	3.6E+07|3.6E+07|2.6E+07	9.8113e+07	3.27043e+07	3	0.002	0.281615	0.5878	MQ	q	I
1177	4104_ML_FinalNorm	AR-22Y-0060DHT	P07196	NEFL	Neurofilament light polypeptide (NF-L) (68 kDa neurofilament protein) (Neurofilament triplet L protein)	0	5.0E+07|3.3E+07|1.7E+07	1.00076e+08	3.33588e+07	3	3.6E+07|3.6E+07|2.6E+07	9.8113e+07	3.27043e+07	3	0.1671	1.02001	0.2313	MQ	q	I
1178	4104_ML_FinalNorm	AR-WT-0000DHT	P07196	NEFL	Neurofilament light polypeptide (NF-L) (68 kDa neurofilament protein) (Neurofilament triplet L protein)	0	3.4E+07|2.5E+07|2.1E+07	7.92519e+07	2.64173e+07	3	3.6E+07|3.6E+07|2.6E+07	9.8113e+07	3.27043e+07	3	0.0229	0.807761	0.4101	MQ	q	I
1179	4104_ML_FinalNorm	AR-WT-0060DHT	P07196	NEFL	Neurofilament light polypeptide (NF-L) (68 kDa neurofilament protein) (Neurofilament triplet L protein)	0	3.2E+07|3.6E+07|2.9E+07	9.65825e+07	3.21942e+07	3	3.6E+07|3.6E+07|2.6E+07	9.8113e+07	3.27043e+07	3	0.0352	0.9844	0.3542	MQ	q	I
1180	4104_ML_FinalNorm	AR-22Y-0000DHT	P07237	P4HB	Protein disulfide-isomerase (PDI) (EC 5.3.4.1) (Cellular thyroid hormone-binding protein) (Prolyl 4-hydroxylase subunit beta) (p55)	0.939899	1.8E+07|2.2E+07|2.3E+07	6.2377e+07	2.07923e+07	3	7.9E+06|1.4E+07|7.6E+06	2.93647e+07	9.78823e+06	3	0.7223	2.12422	0.024	MQ	q	I
1181	4104_ML_FinalNorm	AR-22Y-0060DHT	P07237	P4HB	Protein disulfide-isomerase (PDI) (EC 5.3.4.1) (Cellular thyroid hormone-binding protein) (Prolyl 4-hydroxylase subunit beta) (p55)	0.939899	1.9E+07|2.6E+07|3.4E+07	7.7958e+07	2.5986e+07	3	7.9E+06|1.4E+07|7.6E+06	2.93647e+07	9.78823e+06	3	0.8378	2.65482	0.0102	MQ	q	I
1182	4104_ML_FinalNorm	AR-WT-0000DHT	P07237	P4HB	Protein disulfide-isomerase (PDI) (EC 5.3.4.1) (Cellular thyroid hormone-binding protein) (Prolyl 4-hydroxylase subunit beta) (p55)	0.939899	7.9E+06|8.0E+06|8.6E+06	2.44912e+07	8.16374e+06	3	7.9E+06|1.4E+07|7.6E+06	2.93647e+07	9.78823e+06	3	0.0422	0.834037	0.3359	MQ	q	I
1183	4104_ML_FinalNorm	AR-WT-0060DHT	P07237	P4HB	Protein disulfide-isomerase (PDI) (EC 5.3.4.1) (Cellular thyroid hormone-binding protein) (Prolyl 4-hydroxylase subunit beta) (p55)	0.939899	1.1E+07|1.6E+07|1.2E+07	3.87446e+07	1.29149e+07	3	7.9E+06|1.4E+07|7.6E+06	2.93647e+07	9.78823e+06	3	0.1602	1.31943	0.2356	MQ	q	I
1184	4104_ML_FinalNorm	AR-22Y-0000DHT	P07305	H1-0	Histone H1.0 (Histone H1') (Histone H1(0)) [Cleaved into: Histone H1.0, N-terminally processed]	0.840711	4.4E+08|2.8E+08|2.7E+08	9.89115e+08	3.29705e+08	3	4.0E+07|6.3E+07|8.5E+07	1.8839e+08	6.27967e+07	3	0.9984	5.25035	0.0001	MQ	q	I
1185	4104_ML_FinalNorm	AR-22Y-0060DHT	P07305	H1-0	Histone H1.0 (Histone H1') (Histone H1(0)) [Cleaved into: Histone H1.0, N-terminally processed]	0.840711	2.1E+08|2.1E+08|2.0E+08	6.23064e+08	2.07688e+08	3	4.0E+07|6.3E+07|8.5E+07	1.8839e+08	6.27967e+07	3	0.9644	3.3073	0.0019	MQ	q	I
1186	4104_ML_FinalNorm	AR-WT-0000DHT	P07305	H1-0	Histone H1.0 (Histone H1') (Histone H1(0)) [Cleaved into: Histone H1.0, N-terminally processed]	0.840711	1.3E+07|1.3E+07|1.3E+07	3.87609e+07	1.29203e+07	3	4.0E+07|6.3E+07|8.5E+07	1.8839e+08	6.27967e+07	3	0.0312	0.205748	0.368	MQ	q	I
1187	4104_ML_FinalNorm	AR-WT-0060DHT	P07305	H1-0	Histone H1.0 (Histone H1') (Histone H1(0)) [Cleaved into: Histone H1.0, N-terminally processed]	0.840711	9.3E+06|9.3E+06|1.1E+07	2.94271e+07	9.80903e+06	3	4.0E+07|6.3E+07|8.5E+07	1.8839e+08	6.27967e+07	3	0.0249	0.156203	0.3987	MQ	q	I
1188	4104_ML_FinalNorm	AR-22Y-0000DHT	P07339	CTSD	Cathepsin D (EC 3.4.23.5) [Cleaved into: Cathepsin D light chain; Cathepsin D heavy chain]	0.245559	1.7E+07|2.0E+07|2.0E+07	5.72926e+07	1.90975e+07	3	1.5E+06|6.4E+05|8.6E+05	3.02992e+06	1.00997e+06	3	1	18.909	0	MQ	q	I
1189	4104_ML_FinalNorm	AR-22Y-0060DHT	P07339	CTSD	Cathepsin D (EC 3.4.23.5) [Cleaved into: Cathepsin D light chain; Cathepsin D heavy chain]	0.245559	1.2E+07|1.2E+07|1.6E+07	3.97724e+07	1.32575e+07	3	1.5E+06|6.4E+05|8.6E+05	3.02992e+06	1.00997e+06	3	1	13.1266	0	MQ	q	I
1190	4104_ML_FinalNorm	AR-WT-0000DHT	P07339	CTSD	Cathepsin D (EC 3.4.23.5) [Cleaved into: Cathepsin D light chain; Cathepsin D heavy chain]	0.245559	6.1E+05|8.5E+05|1.7E+06	3.12383e+06	1.04128e+06	3	1.5E+06|6.4E+05|8.6E+05	3.02992e+06	1.00997e+06	3	0.1131	1.03099	0.2572	MQ	q	I
1191	4104_ML_FinalNorm	AR-WT-0060DHT	P07339	CTSD	Cathepsin D (EC 3.4.23.5) [Cleaved into: Cathepsin D light chain; Cathepsin D heavy chain]	0.245559	NAN|NAN|7.0E+05	704853	704853	3	1.5E+06|6.4E+05|8.6E+05	3.02992e+06	1.00997e+06	3	0.0223	0.697893	0.4133	MQ	q	I
1192	4104_ML_FinalNorm	AR-22Y-0000DHT	P07355	ANXA2	Annexin A2 (Annexin II) (Annexin-2) (Calpactin I heavy chain) (Calpactin-1 heavy chain) (Chromobindin-8) (Lipocortin II) (Placental anticoagulant protein IV) (PAP-IV) (Protein I) (p36)	0.964705	1.2E+09|1.0E+09|9.5E+08	3.11615e+09	1.03872e+09	3	1.4E+09|1.2E+09|1.3E+09	3.96414e+09	1.32138e+09	3	0.0168	0.786084	0.4474	MQ	q	I
1193	4104_ML_FinalNorm	AR-22Y-0060DHT	P07355	ANXA2	Annexin A2 (Annexin II) (Annexin-2) (Calpactin I heavy chain) (Calpactin-1 heavy chain) (Chromobindin-8) (Lipocortin II) (Placental anticoagulant protein IV) (PAP-IV) (Protein I) (p36)	0.964705	9.5E+08|9.9E+08|9.6E+08	2.89562e+09	9.65207e+08	3	1.4E+09|1.2E+09|1.3E+09	3.96414e+09	1.32138e+09	3	0.0143	0.730454	0.4655	MQ	q	I
1194	4104_ML_FinalNorm	AR-WT-0000DHT	P07355	ANXA2	Annexin A2 (Annexin II) (Annexin-2) (Calpactin I heavy chain) (Calpactin-1 heavy chain) (Chromobindin-8) (Lipocortin II) (Placental anticoagulant protein IV) (PAP-IV) (Protein I) (p36)	0.964705	5.0E+08|4.8E+08|4.7E+08	1.45103e+09	4.83675e+08	3	1.4E+09|1.2E+09|1.3E+09	3.96414e+09	1.32138e+09	3	0.0023	0.366038	0.5825	MQ	q	I
1195	4104_ML_FinalNorm	AR-WT-0060DHT	P07355	ANXA2	Annexin A2 (Annexin II) (Annexin-2) (Calpactin I heavy chain) (Calpactin-1 heavy chain) (Chromobindin-8) (Lipocortin II) (Placental anticoagulant protein IV) (PAP-IV) (Protein I) (p36)	0.964705	4.1E+08|4.0E+08|3.9E+08	1.21162e+09	4.03873e+08	3	1.4E+09|1.2E+09|1.3E+09	3.96414e+09	1.32138e+09	3	0.0013	0.305645	0.5984	MQ	q	I
1196	4104_ML_FinalNorm	AR-22Y-0000DHT	P07384	CAPN1	Calpain-1 catalytic subunit (EC 3.4.22.52) (Calcium-activated neutral proteinase 1) (CANP 1) (Calpain mu-type) (Calpain-1 large subunit) (Cell proliferation-inducing gene 30 protein) (Micromolar-calpain) (muCANP)	0.738472	2.2E+07|3.2E+07|2.3E+07	7.70947e+07	2.56982e+07	3	3.1E+07|2.5E+07|2.3E+07	7.90372e+07	2.63457e+07	3	0.0511	0.975423	0.3197	MQ	q	I
1197	4104_ML_FinalNorm	AR-22Y-0060DHT	P07384	CAPN1	Calpain-1 catalytic subunit (EC 3.4.22.52) (Calcium-activated neutral proteinase 1) (CANP 1) (Calpain mu-type) (Calpain-1 large subunit) (Cell proliferation-inducing gene 30 protein) (Micromolar-calpain) (muCANP)	0.738472	1.6E+07|8.7E+06|1.5E+07	4.03318e+07	1.34439e+07	3	3.1E+07|2.5E+07|2.3E+07	7.90372e+07	2.63457e+07	3	0.0232	0.510289	0.4078	MQ	q	I
1198	4104_ML_FinalNorm	AR-WT-0000DHT	P07384	CAPN1	Calpain-1 catalytic subunit (EC 3.4.22.52) (Calcium-activated neutral proteinase 1) (CANP 1) (Calpain mu-type) (Calpain-1 large subunit) (Cell proliferation-inducing gene 30 protein) (Micromolar-calpain) (muCANP)	0.738472	4.4E+05|1.5E+06|2.0E+06	3.97343e+06	1.32448e+06	3	3.1E+07|2.5E+07|2.3E+07	7.90372e+07	2.63457e+07	3	0.0025	0.0502729	0.579	MQ	q	I
1199	4104_ML_FinalNorm	AR-WT-0060DHT	P07384	CAPN1	Calpain-1 catalytic subunit (EC 3.4.22.52) (Calcium-activated neutral proteinase 1) (CANP 1) (Calpain mu-type) (Calpain-1 large subunit) (Cell proliferation-inducing gene 30 protein) (Micromolar-calpain) (muCANP)	0.738472	8.1E+05|1.3E+06|9.3E+05	3.0807e+06	1.0269e+06	3	3.1E+07|2.5E+07|2.3E+07	7.90372e+07	2.63457e+07	3	0.0017	0.0389779	0.5923	MQ	q	I
1200	4104_ML_FinalNorm	AR-22Y-0000DHT	P07437	TUBB	Tubulin beta chain (Tubulin beta-5 chain)	0.998707	5.1E+08|4.8E+08|4.7E+08	1.46405e+09	4.88016e+08	3	3.0E+08|2.9E+08|3.2E+08	9.0651e+08	3.0217e+08	3	0.842	1.61504	0.0098	MQ	q	I
1201	4104_ML_FinalNorm	AR-22Y-0060DHT	P07437	TUBB	Tubulin beta chain (Tubulin beta-5 chain)	0.998707	3.4E+08|4.7E+08|4.5E+08	1.26113e+09	4.20376e+08	3	3.0E+08|2.9E+08|3.2E+08	9.0651e+08	3.0217e+08	3	0.4518	1.39119	0.1044	MQ	q	I
1202	4104_ML_FinalNorm	AR-WT-0000DHT	P07437	TUBB	Tubulin beta chain (Tubulin beta-5 chain)	0.998707	5.6E+07|7.7E+07|5.8E+07	1.91947e+08	6.39822e+07	3	3.0E+08|2.9E+08|3.2E+08	9.0651e+08	3.0217e+08	3	0.0028	0.211742	0.5734	MQ	q	I
1203	4104_ML_FinalNorm	AR-WT-0060DHT	P07437	TUBB	Tubulin beta chain (Tubulin beta-5 chain)	0.998707	5.3E+07|9.5E+07|8.6E+07	2.33679e+08	7.7893e+07	3	3.0E+08|2.9E+08|3.2E+08	9.0651e+08	3.0217e+08	3	0.0043	0.257779	0.5543	MQ	q	I
1204	4104_ML_FinalNorm	AR-22Y-0000DHT	P07476	IVL	Involucrin	0.523564	1.2E+07|1.0E+07|8.7E+06	3.14889e+07	1.04963e+07	3	7.7E+03|9.4E+03|9.0E+03	26165.3	8721.77	3	1	1203.46	0	MQ	q	I
1205	4104_ML_FinalNorm	AR-22Y-0060DHT	P07476	IVL	Involucrin	0.523564	7.8E+06|1.3E+07|9.8E+06	3.05934e+07	1.01978e+07	3	7.7E+03|9.4E+03|9.0E+03	26165.3	8721.77	3	1	1169.24	0	MQ	q	I
1206	4104_ML_FinalNorm	AR-WT-0060DHT	P07476	IVL	Involucrin	0.523564	8.7E+04|NAN|NAN	87051.4	87051.4	3	7.7E+03|9.4E+03|9.0E+03	26165.3	8721.77	3	0.3333	9.98094	0.1476	MQ	q	I
1207	4104_ML_FinalNorm	AR-22Y-0000DHT	P07737	PFN1	Profilin-1 (Epididymis tissue protein Li 184a) (Profilin I)	0.959691	9.0E+07|1.0E+08|1.0E+08	2.95403e+08	9.84676e+07	3	5.2E+06|4.3E+06|3.1E+06	1.25473e+07	4.18245e+06	3	1	23.543	0	MQ	q	I
1208	4104_ML_FinalNorm	AR-22Y-0060DHT	P07737	PFN1	Profilin-1 (Epididymis tissue protein Li 184a) (Profilin I)	0.959691	4.9E+06|3.9E+06|9.8E+06	1.86336e+07	6.21121e+06	3	5.2E+06|4.3E+06|3.1E+06	1.25473e+07	4.18245e+06	3	0.3671	1.48507	0.1279	MQ	q	I
1209	4104_ML_FinalNorm	AR-WT-0000DHT	P07737	PFN1	Profilin-1 (Epididymis tissue protein Li 184a) (Profilin I)	0.959691	3.9E+06|4.2E+06|2.5E+06	1.06244e+07	3.54146e+06	3	5.2E+06|4.3E+06|3.1E+06	1.25473e+07	4.18245e+06	3	0.0491	0.846744	0.3226	MQ	q	I
1210	4104_ML_FinalNorm	AR-WT-0060DHT	P07737	PFN1	Profilin-1 (Epididymis tissue protein Li 184a) (Profilin I)	0.959691	4.0E+06|3.5E+06|3.3E+06	1.07407e+07	3.58022e+06	3	5.2E+06|4.3E+06|3.1E+06	1.25473e+07	4.18245e+06	3	0.0498	0.85601	0.3209	MQ	q	I
1211	4104_ML_FinalNorm	AR-22Y-0000DHT	P07741	APRT	Adenine phosphoribosyltransferase (APRT) (EC 2.4.2.7)	0.79143	2.6E+07|1.0E+07|3.9E+06	4.01552e+07	1.33851e+07	3	1.6E+06|7.3E+05|1.5E+06	3.79126e+06	1.26375e+06	3	0.9649	10.5915	0.0019	MQ	q	I
1212	4104_ML_FinalNorm	AR-22Y-0000DHT	P07814	EPRS1	Bifunctional glutamate/proline--tRNA ligase (Bifunctional aminoacyl-tRNA synthetase) (Cell proliferation-inducing gene 32 protein) (Glutamatyl-prolyl-tRNA synthetase) [Includes: Glutamate--tRNA ligase (EC 6.1.1.17) (Glutamyl-tRNA synthetase) (GluRS); Proline--tRNA ligase (EC 6.1.1.15) (Prolyl-tRNA synthetase)]	0.97051	3.3E+07|4.8E+07|5.4E+07	1.33739e+08	4.45797e+07	3	1.1E+08|1.2E+08|1.2E+08	3.48716e+08	1.16239e+08	3	0.0029	0.383519	0.5723	MQ	q	I
1213	4104_ML_FinalNorm	AR-22Y-0060DHT	P07814	EPRS1	Bifunctional glutamate/proline--tRNA ligase (Bifunctional aminoacyl-tRNA synthetase) (Cell proliferation-inducing gene 32 protein) (Glutamatyl-prolyl-tRNA synthetase) [Includes: Glutamate--tRNA ligase (EC 6.1.1.17) (Glutamyl-tRNA synthetase) (GluRS); Proline--tRNA ligase (EC 6.1.1.15) (Prolyl-tRNA synthetase)]	0.97051	4.0E+07|3.5E+07|5.9E+07	1.34364e+08	4.47881e+07	3	1.1E+08|1.2E+08|1.2E+08	3.48716e+08	1.16239e+08	3	0.003	0.385312	0.5707	MQ	q	I
1214	4104_ML_FinalNorm	AR-WT-0000DHT	P07814	EPRS1	Bifunctional glutamate/proline--tRNA ligase (Bifunctional aminoacyl-tRNA synthetase) (Cell proliferation-inducing gene 32 protein) (Glutamatyl-prolyl-tRNA synthetase) [Includes: Glutamate--tRNA ligase (EC 6.1.1.17) (Glutamyl-tRNA synthetase) (GluRS); Proline--tRNA ligase (EC 6.1.1.15) (Prolyl-tRNA synthetase)]	0.97051	2.0E+07|1.5E+07|1.8E+07	5.32094e+07	1.77365e+07	3	1.1E+08|1.2E+08|1.2E+08	3.48716e+08	1.16239e+08	3	0.0001	0.152587	0.6286	MQ	q	I
1215	4104_ML_FinalNorm	AR-WT-0060DHT	P07814	EPRS1	Bifunctional glutamate/proline--tRNA ligase (Bifunctional aminoacyl-tRNA synthetase) (Cell proliferation-inducing gene 32 protein) (Glutamatyl-prolyl-tRNA synthetase) [Includes: Glutamate--tRNA ligase (EC 6.1.1.17) (Glutamyl-tRNA synthetase) (GluRS); Proline--tRNA ligase (EC 6.1.1.15) (Prolyl-tRNA synthetase)]	0.97051	1.3E+07|1.1E+07|1.3E+07	3.64976e+07	1.21659e+07	3	1.1E+08|1.2E+08|1.2E+08	3.48716e+08	1.16239e+08	3	0	0.104663	0.6339	MQ	q	I
1216	4104_ML_FinalNorm	AR-22Y-0000DHT	P07858	CTSB	Cathepsin B (EC 3.4.22.1) (APP secretase) (APPS) (Cathepsin B1) [Cleaved into: Cathepsin B light chain; Cathepsin B heavy chain]	0.664084	NAN|1.5E+07|2.3E+07	3.83864e+07	1.91932e+07	3	7.5E+06|5.8E+06|8.2E+06	2.1465e+07	7.15499e+06	3	0.6661	2.68249	0.0601	MQ	q	I
1217	4104_ML_FinalNorm	AR-WT-0000DHT	P07858	CTSB	Cathepsin B (EC 3.4.22.1) (APP secretase) (APPS) (Cathepsin B1) [Cleaved into: Cathepsin B light chain; Cathepsin B heavy chain]	0.664084	5.1E+05|NAN|NAN	508967	508967	3	7.5E+06|5.8E+06|8.2E+06	2.1465e+07	7.15499e+06	3	0.0025	0.0711345	0.579	MQ	q	I
1218	4104_ML_FinalNorm	AR-WT-0060DHT	P07858	CTSB	Cathepsin B (EC 3.4.22.1) (APP secretase) (APPS) (Cathepsin B1) [Cleaved into: Cathepsin B light chain; Cathepsin B heavy chain]	0.664084	NAN|NAN|5.4E+05	541470	541470	3	7.5E+06|5.8E+06|8.2E+06	2.1465e+07	7.15499e+06	3	0.0027	0.0756773	0.5756	MQ	q	I
1219	4104_ML_FinalNorm	AR-22Y-0000DHT	P07900	HSP90AA1	Heat shock protein HSP 90-alpha (EC 3.6.4.10) (Heat shock 86 kDa) (HSP 86) (HSP86) (Lipopolysaccharide-associated protein 2) (LAP-2) (LPS-associated protein 2) (Renal carcinoma antigen NY-REN-38)	0.995295	3.0E+08|2.7E+08|3.0E+08	8.65053e+08	2.88351e+08	3	1.8E+08|1.8E+08|2.0E+08	5.60067e+08	1.86689e+08	3	0.6963	1.54455	0.0294	MQ	q	I
1220	4104_ML_FinalNorm	AR-22Y-0060DHT	P07900	HSP90AA1	Heat shock protein HSP 90-alpha (EC 3.6.4.10) (Heat shock 86 kDa) (HSP 86) (HSP86) (Lipopolysaccharide-associated protein 2) (LAP-2) (LPS-associated protein 2) (Renal carcinoma antigen NY-REN-38)	0.995295	2.0E+08|1.7E+08|1.8E+08	5.5599e+08	1.8533e+08	3	1.8E+08|1.8E+08|2.0E+08	5.60067e+08	1.86689e+08	3	0.0278	0.99272	0.3832	MQ	q	I
1221	4104_ML_FinalNorm	AR-WT-0000DHT	P07900	HSP90AA1	Heat shock protein HSP 90-alpha (EC 3.6.4.10) (Heat shock 86 kDa) (HSP 86) (HSP86) (Lipopolysaccharide-associated protein 2) (LAP-2) (LPS-associated protein 2) (Renal carcinoma antigen NY-REN-38)	0.995295	1.5E+08|1.4E+08|1.3E+08	4.22728e+08	1.40909e+08	3	1.8E+08|1.8E+08|2.0E+08	5.60067e+08	1.86689e+08	3	0.0154	0.75478	0.4579	MQ	q	I
1222	4104_ML_FinalNorm	AR-WT-0060DHT	P07900	HSP90AA1	Heat shock protein HSP 90-alpha (EC 3.6.4.10) (Heat shock 86 kDa) (HSP 86) (HSP86) (Lipopolysaccharide-associated protein 2) (LAP-2) (LPS-associated protein 2) (Renal carcinoma antigen NY-REN-38)	0.995295	1.2E+08|1.3E+08|1.2E+08	3.73447e+08	1.24482e+08	3	1.8E+08|1.8E+08|2.0E+08	5.60067e+08	1.86689e+08	3	0.0117	0.66679	0.4855	MQ	q	I
1223	4104_ML_FinalNorm	AR-22Y-0000DHT	P07910	HNRNPC	Heterogeneous nuclear ribonucleoproteins C1/C2 (hnRNP C1/C2)	0.97316	1.1E+08|1.2E+08|1.4E+08	3.704e+08	1.23467e+08	3	1.5E+08|1.7E+08|1.6E+08	4.83125e+08	1.61042e+08	3	0.0289	0.766676	0.3787	MQ	q	I
1224	4104_ML_FinalNorm	AR-22Y-0060DHT	P07910	HNRNPC	Heterogeneous nuclear ribonucleoproteins C1/C2 (hnRNP C1/C2)	0.97316	2.4E+08|2.5E+08|2.6E+08	7.51873e+08	2.50624e+08	3	1.5E+08|1.7E+08|1.6E+08	4.83125e+08	1.61042e+08	3	0.7116	1.55627	0.0268	MQ	q	I
1225	4104_ML_FinalNorm	AR-WT-0000DHT	P07910	HNRNPC	Heterogeneous nuclear ribonucleoproteins C1/C2 (hnRNP C1/C2)	0.97316	1.8E+07|2.0E+07|2.0E+07	5.80128e+07	1.93376e+07	3	1.5E+08|1.7E+08|1.6E+08	4.83125e+08	1.61042e+08	3	0.0027	0.120078	0.5756	MQ	q	I
1226	4104_ML_FinalNorm	AR-WT-0060DHT	P07910	HNRNPC	Heterogeneous nuclear ribonucleoproteins C1/C2 (hnRNP C1/C2)	0.97316	1.7E+07|1.8E+07|1.4E+07	4.91261e+07	1.63754e+07	3	1.5E+08|1.7E+08|1.6E+08	4.83125e+08	1.61042e+08	3	0.002	0.101684	0.5878	MQ	q	I
1227	4104_ML_FinalNorm	AR-22Y-0000DHT	P07954	FH	Fumarate hydratase, mitochondrial (Fumarase) (HsFH) (EC 4.2.1.2)	0.767199	1.9E+08|1.8E+08|1.8E+08	5.46879e+08	1.82293e+08	3	3.7E+07|4.3E+07|4.5E+07	1.24324e+08	4.14412e+07	3	1	4.39884	0	MQ	q	I
1228	4104_ML_FinalNorm	AR-22Y-0060DHT	P07954	FH	Fumarate hydratase, mitochondrial (Fumarase) (HsFH) (EC 4.2.1.2)	0.767199	5.7E+07|8.0E+07|7.5E+07	2.11833e+08	7.06109e+07	3	3.7E+07|4.3E+07|4.5E+07	1.24324e+08	4.14412e+07	3	0.7359	1.70388	0.0218	MQ	q	I
1229	4104_ML_FinalNorm	AR-WT-0000DHT	P07954	FH	Fumarate hydratase, mitochondrial (Fumarase) (HsFH) (EC 4.2.1.2)	0.767199	3.5E+06|3.1E+06|3.9E+06	1.04479e+07	3.48265e+06	3	3.7E+07|4.3E+07|4.5E+07	1.24324e+08	4.14412e+07	3	0.0078	0.0840384	0.5169	MQ	q	I
1230	4104_ML_FinalNorm	AR-WT-0060DHT	P07954	FH	Fumarate hydratase, mitochondrial (Fumarase) (HsFH) (EC 4.2.1.2)	0.767199	2.9E+06|2.6E+06|4.3E+06	9.73774e+06	3.24591e+06	3	3.7E+07|4.3E+07|4.5E+07	1.24324e+08	4.14412e+07	3	0.0073	0.0783258	0.5222	MQ	q	I
1231	4104_ML_FinalNorm	AR-22Y-0000DHT	P08133	ANXA6	Annexin A6 (67 kDa calelectrin) (Annexin VI) (Annexin-6) (Calphobindin-II) (CPB-II) (Chromobindin-20) (Lipocortin VI) (Protein III) (p68) (p70)	0.742136	2.4E+07|3.0E+07|3.8E+07	9.1876e+07	3.06253e+07	3	2.4E+07|2.1E+07|2.3E+07	6.83339e+07	2.2778e+07	3	0.3557	1.34452	0.1341	MQ	q	I
1232	4104_ML_FinalNorm	AR-WT-0000DHT	P08133	ANXA6	Annexin A6 (67 kDa calelectrin) (Annexin VI) (Annexin-6) (Calphobindin-II) (CPB-II) (Chromobindin-20) (Lipocortin VI) (Protein III) (p68) (p70)	0.742136	4.2E+05|2.1E+06|1.2E+06	3.70293e+06	1.23431e+06	3	2.4E+07|2.1E+07|2.3E+07	6.83339e+07	2.2778e+07	3	0.0034	0.0541888	0.5648	MQ	q	I
1233	4104_ML_FinalNorm	AR-WT-0060DHT	P08133	ANXA6	Annexin A6 (67 kDa calelectrin) (Annexin VI) (Annexin-6) (Calphobindin-II) (CPB-II) (Chromobindin-20) (Lipocortin VI) (Protein III) (p68) (p70)	0.742136	2.3E+06|1.9E+06|NAN	4.15891e+06	2.07946e+06	3	2.4E+07|2.1E+07|2.3E+07	6.83339e+07	2.2778e+07	3	0.0041	0.0912924	0.5561	MQ	q	I
1234	4104_ML_FinalNorm	AR-22Y-0000DHT	P08134	RHOC	Rho-related GTP-binding protein RhoC (Rho cDNA clone 9) (h9)	0.79284	5.7E+06|7.0E+06|5.5E+06	1.81831e+07	6.06103e+06	3	2.1E+06|1.7E+06|1.2E+06	5.02639e+06	1.67546e+06	3	0.9998	3.61752	0	MQ	q	I
1235	4104_ML_FinalNorm	AR-22Y-0060DHT	P08134	RHOC	Rho-related GTP-binding protein RhoC (Rho cDNA clone 9) (h9)	0.79284	2.6E+06|3.6E+06|4.1E+06	1.02405e+07	3.41349e+06	3	2.1E+06|1.7E+06|1.2E+06	5.02639e+06	1.67546e+06	3	0.7135	2.03734	0.0259	MQ	q	I
1236	4104_ML_FinalNorm	AR-WT-0000DHT	P08134	RHOC	Rho-related GTP-binding protein RhoC (Rho cDNA clone 9) (h9)	0.79284	1.9E+06|1.8E+06|1.4E+06	5.06527e+06	1.68842e+06	3	2.1E+06|1.7E+06|1.2E+06	5.02639e+06	1.67546e+06	3	0.0512	1.00774	0.3192	MQ	q	I
1237	4104_ML_FinalNorm	AR-WT-0060DHT	P08134	RHOC	Rho-related GTP-binding protein RhoC (Rho cDNA clone 9) (h9)	0.79284	NAN|9.7E+05|1.2E+06	2.20204e+06	1.10102e+06	3	2.1E+06|1.7E+06|1.2E+06	5.02639e+06	1.67546e+06	3	0.014	0.657144	0.4675	MQ	q	I
1238	4104_ML_FinalNorm	AR-22Y-0000DHT	P08195	SLC3A2	4F2 cell-surface antigen heavy chain (4F2hc) (4F2 heavy chain antigen) (Lymphocyte activation antigen 4F2 large subunit) (Solute carrier family 3 member 2) (CD antigen CD98)	0.894172	6.0E+06|3.1E+06|3.3E+06	1.24203e+07	4.14011e+06	3	2.9E+05|1.2E+06|1.2E+06	2.73531e+06	911770	3	0.7826	4.54074	0.0165	MQ	q	I
1239	4104_ML_FinalNorm	AR-22Y-0060DHT	P08195	SLC3A2	4F2 cell-surface antigen heavy chain (4F2hc) (4F2 heavy chain antigen) (Lymphocyte activation antigen 4F2 large subunit) (Solute carrier family 3 member 2) (CD antigen CD98)	0.894172	2.5E+06|4.1E+06|4.6E+06	1.11476e+07	3.71588e+06	3	2.9E+05|1.2E+06|1.2E+06	2.73531e+06	911770	3	0.7515	4.07546	0.0198	MQ	q	I
1240	4104_ML_FinalNorm	AR-WT-0000DHT	P08195	SLC3A2	4F2 cell-surface antigen heavy chain (4F2hc) (4F2 heavy chain antigen) (Lymphocyte activation antigen 4F2 large subunit) (Solute carrier family 3 member 2) (CD antigen CD98)	0.894172	8.1E+05|1.2E+06|1.1E+06	3.09522e+06	1.03174e+06	3	2.9E+05|1.2E+06|1.2E+06	2.73531e+06	911770	3	0.2004	1.13158	0.2183	MQ	q	I
1241	4104_ML_FinalNorm	AR-WT-0060DHT	P08195	SLC3A2	4F2 cell-surface antigen heavy chain (4F2hc) (4F2 heavy chain antigen) (Lymphocyte activation antigen 4F2 large subunit) (Solute carrier family 3 member 2) (CD antigen CD98)	0.894172	1.2E+06|1.3E+06|1.0E+06	3.4489e+06	1.14963e+06	3	2.9E+05|1.2E+06|1.2E+06	2.73531e+06	911770	3	0.2341	1.26088	0.2054	MQ	q	I
1242	4104_ML_FinalNorm	AR-WT-0000DHT	P08235	NR3C2	Mineralocorticoid receptor (MR) (Nuclear receptor subfamily 3 group C member 2)	0	5.7E+05|8.7E+05|9.0E+05	2.33759e+06	779196	3	7.7E+03|7.5E+03|9.5E+03	24683.1	8227.69	3	1	94.704	0	MQ	q	I
1243	4104_ML_FinalNorm	AR-WT-0060DHT	P08235	NR3C2	Mineralocorticoid receptor (MR) (Nuclear receptor subfamily 3 group C member 2)	0	1.0E+06|9.5E+05|1.0E+06	2.97788e+06	992627	3	7.7E+03|7.5E+03|9.5E+03	24683.1	8227.69	3	1	120.645	0	MQ	q	I
1244	4104_ML_FinalNorm	AR-22Y-0000DHT	P08237	PFKM	ATP-dependent 6-phosphofructokinase, muscle type (ATP-PFK) (PFK-M) (EC 2.7.1.11) (6-phosphofructokinase type A) (Phosphofructo-1-kinase isozyme A) (PFK-A) (Phosphohexokinase)	0	7.9E+06|8.7E+06|8.5E+06	2.51148e+07	8.3716e+06	3	1.1E+07|1.0E+07|1.0E+07	3.10331e+07	1.03444e+07	3	0.0178	0.809292	0.4414	MQ	q	I
1245	4104_ML_FinalNorm	AR-22Y-0060DHT	P08237	PFKM	ATP-dependent 6-phosphofructokinase, muscle type (ATP-PFK) (PFK-M) (EC 2.7.1.11) (6-phosphofructokinase type A) (Phosphofructo-1-kinase isozyme A) (PFK-A) (Phosphohexokinase)	0	3.3E+06|2.1E+06|9.6E+06	1.49869e+07	4.99563e+06	3	1.1E+07|1.0E+07|1.0E+07	3.10331e+07	1.03444e+07	3	0.0084	0.482933	0.5111	MQ	q	I
1246	4104_ML_FinalNorm	AR-WT-0000DHT	P08237	PFKM	ATP-dependent 6-phosphofructokinase, muscle type (ATP-PFK) (PFK-M) (EC 2.7.1.11) (6-phosphofructokinase type A) (Phosphofructo-1-kinase isozyme A) (PFK-A) (Phosphohexokinase)	0	5.7E+06|6.3E+06|4.5E+06	1.65513e+07	5.51709e+06	3	1.1E+07|1.0E+07|1.0E+07	3.10331e+07	1.03444e+07	3	0.0069	0.533344	0.5266	MQ	q	I
1247	4104_ML_FinalNorm	AR-WT-0060DHT	P08237	PFKM	ATP-dependent 6-phosphofructokinase, muscle type (ATP-PFK) (PFK-M) (EC 2.7.1.11) (6-phosphofructokinase type A) (Phosphofructo-1-kinase isozyme A) (PFK-A) (Phosphohexokinase)	0	4.6E+06|6.2E+06|6.1E+06	1.68861e+07	5.62869e+06	3	1.1E+07|1.0E+07|1.0E+07	3.10331e+07	1.03444e+07	3	0.0073	0.544132	0.5222	MQ	q	I
1248	4104_ML_FinalNorm	AR-22Y-0000DHT	P08238	HSP90AB1	Heat shock protein HSP 90-beta (HSP 90) (Heat shock 84 kDa) (HSP 84) (HSP84)	0.995605	5.0E+08|5.3E+08|5.2E+08	1.54696e+09	5.15652e+08	3	3.8E+08|3.8E+08|3.8E+08	1.14404e+09	3.81346e+08	3	0.2286	1.35219	0.2073	MQ	q	I
1249	4104_ML_FinalNorm	AR-22Y-0060DHT	P08238	HSP90AB1	Heat shock protein HSP 90-beta (HSP 90) (Heat shock 84 kDa) (HSP 84) (HSP84)	0.995605	3.9E+08|4.1E+08|4.6E+08	1.25636e+09	4.18787e+08	3	3.8E+08|3.8E+08|3.8E+08	1.14404e+09	3.81346e+08	3	0.0447	1.09818	0.3304	MQ	q	I
1250	4104_ML_FinalNorm	AR-WT-0000DHT	P08238	HSP90AB1	Heat shock protein HSP 90-beta (HSP 90) (Heat shock 84 kDa) (HSP 84) (HSP84)	0.995605	1.9E+08|1.9E+08|1.9E+08	5.65006e+08	1.88335e+08	3	3.8E+08|3.8E+08|3.8E+08	1.14404e+09	3.81346e+08	3	0.0055	0.49387	0.5398	MQ	q	I
1251	4104_ML_FinalNorm	AR-WT-0060DHT	P08238	HSP90AB1	Heat shock protein HSP 90-beta (HSP 90) (Heat shock 84 kDa) (HSP 84) (HSP84)	0.995605	1.6E+08|1.6E+08|1.5E+08	4.63991e+08	1.54664e+08	3	3.8E+08|3.8E+08|3.8E+08	1.14404e+09	3.81346e+08	3	0.0031	0.405573	0.5692	MQ	q	I
1252	4104_ML_FinalNorm	AR-22Y-0000DHT	P08240	SRPRA	Signal recognition particle receptor subunit alpha (SR-alpha) (Docking protein alpha) (DP-alpha)	0	1.2E+07|9.9E+06|1.6E+06	2.33651e+07	7.78835e+06	3	1.7E+07|2.2E+07|2.3E+07	6.09625e+07	2.03208e+07	3	0.012	0.38327	0.4827	MQ	q	I
1253	4104_ML_FinalNorm	AR-22Y-0060DHT	P08240	SRPRA	Signal recognition particle receptor subunit alpha (SR-alpha) (Docking protein alpha) (DP-alpha)	0	1.2E+06|2.1E+06|6.6E+06	9.93323e+06	3.31108e+06	3	1.7E+07|2.2E+07|2.3E+07	6.09625e+07	2.03208e+07	3	0.0032	0.16294	0.5678	MQ	q	I
1254	4104_ML_FinalNorm	AR-WT-0000DHT	P08240	SRPRA	Signal recognition particle receptor subunit alpha (SR-alpha) (Docking protein alpha) (DP-alpha)	0	2.0E+07|2.1E+07|1.9E+07	5.99743e+07	1.99914e+07	3	1.7E+07|2.2E+07|2.3E+07	6.09625e+07	2.03208e+07	3	0.0358	0.983791	0.3515	MQ	q	I
1255	4104_ML_FinalNorm	AR-WT-0060DHT	P08240	SRPRA	Signal recognition particle receptor subunit alpha (SR-alpha) (Docking protein alpha) (DP-alpha)	0	1.7E+07|1.7E+07|1.7E+07	5.08465e+07	1.69488e+07	3	1.7E+07|2.2E+07|2.3E+07	6.09625e+07	2.03208e+07	3	0.0299	0.834062	0.3737	MQ	q	I
1256	4104_ML_FinalNorm	AR-22Y-0000DHT	P08559	PDHA1	Pyruvate dehydrogenase E1 component subunit alpha, somatic form, mitochondrial (EC 1.2.4.1) (PDHE1-A type I)	0.890637	3.0E+07|2.9E+07|3.5E+07	9.40482e+07	3.13494e+07	3	1.7E+07|1.5E+07|1.8E+07	5.03245e+07	1.67748e+07	3	0.9754	1.86884	0.0013	MQ	q	I
1257	4104_ML_FinalNorm	AR-22Y-0060DHT	P08559	PDHA1	Pyruvate dehydrogenase E1 component subunit alpha, somatic form, mitochondrial (EC 1.2.4.1) (PDHE1-A type I)	0.890637	2.7E+07|2.5E+07|3.4E+07	8.59655e+07	2.86552e+07	3	1.7E+07|1.5E+07|1.8E+07	5.03245e+07	1.67748e+07	3	0.7949	1.70822	0.0153	MQ	q	I
1258	4104_ML_FinalNorm	AR-WT-0000DHT	P08559	PDHA1	Pyruvate dehydrogenase E1 component subunit alpha, somatic form, mitochondrial (EC 1.2.4.1) (PDHE1-A type I)	0.890637	1.6E+06|2.4E+06|3.2E+06	7.26755e+06	2.42252e+06	3	1.7E+07|1.5E+07|1.8E+07	5.03245e+07	1.67748e+07	3	0.0072	0.144414	0.5233	MQ	q	I
1259	4104_ML_FinalNorm	AR-WT-0060DHT	P08559	PDHA1	Pyruvate dehydrogenase E1 component subunit alpha, somatic form, mitochondrial (EC 1.2.4.1) (PDHE1-A type I)	0.890637	1.4E+06|1.9E+06|1.2E+06	4.41843e+06	1.47281e+06	3	1.7E+07|1.5E+07|1.8E+07	5.03245e+07	1.67748e+07	3	0.004	0.0877989	0.5576	MQ	q	I
1260	4104_ML_FinalNorm	AR-22Y-0000DHT	P08574	CYC1	Cytochrome c1, heme protein, mitochondrial (EC 7.1.1.8) (Complex III subunit 4) (Complex III subunit IV) (Cytochrome b-c1 complex subunit 4) (Ubiquinol-cytochrome-c reductase complex cytochrome c1 subunit) (Cytochrome c-1)	0.631238	NAN|3.1E+06|3.8E+06	6.84391e+06	3.42196e+06	3	3.6E+06|1.5E+06|1.5E+06	6.62528e+06	2.20843e+06	3	0.1706	1.5495	0.2297	MQ	q	I
1261	4104_ML_FinalNorm	AR-22Y-0060DHT	P08574	CYC1	Cytochrome c1, heme protein, mitochondrial (EC 7.1.1.8) (Complex III subunit 4) (Complex III subunit IV) (Cytochrome b-c1 complex subunit 4) (Ubiquinol-cytochrome-c reductase complex cytochrome c1 subunit) (Cytochrome c-1)	0.631238	2.5E+06|3.3E+06|5.1E+06	1.08861e+07	3.62871e+06	3	3.6E+06|1.5E+06|1.5E+06	6.62528e+06	2.20843e+06	3	0.3141	1.64312	0.1792	MQ	q	I
1262	4104_ML_FinalNorm	AR-WT-0000DHT	P08574	CYC1	Cytochrome c1, heme protein, mitochondrial (EC 7.1.1.8) (Complex III subunit 4) (Complex III subunit IV) (Cytochrome b-c1 complex subunit 4) (Ubiquinol-cytochrome-c reductase complex cytochrome c1 subunit) (Cytochrome c-1)	0.631238	9.5E+05|1.0E+06|NAN	1.97309e+06	986547	3	3.6E+06|1.5E+06|1.5E+06	6.62528e+06	2.20843e+06	3	0.0135	0.44672	0.4718	MQ	q	I
1263	4104_ML_FinalNorm	AR-WT-0060DHT	P08574	CYC1	Cytochrome c1, heme protein, mitochondrial (EC 7.1.1.8) (Complex III subunit 4) (Complex III subunit IV) (Cytochrome b-c1 complex subunit 4) (Ubiquinol-cytochrome-c reductase complex cytochrome c1 subunit) (Cytochrome c-1)	0.631238	5.7E+05|NAN|7.8E+05	1.35061e+06	675306	3	3.6E+06|1.5E+06|1.5E+06	6.62528e+06	2.20843e+06	3	0.005	0.305786	0.546	MQ	q	I
1264	4104_ML_FinalNorm	AR-22Y-0000DHT	P08621	SNRNP70	U1 small nuclear ribonucleoprotein 70 kDa (U1 snRNP 70 kDa) (U1-70K) (snRNP70)	0.937871	5.2E+07|4.7E+07|4.3E+07	1.41256e+08	4.70854e+07	3	2.6E+07|2.7E+07|2.8E+07	8.02569e+07	2.67523e+07	3	0.9131	1.76005	0.0053	MQ	q	I
1265	4104_ML_FinalNorm	AR-22Y-0060DHT	P08621	SNRNP70	U1 small nuclear ribonucleoprotein 70 kDa (U1 snRNP 70 kDa) (U1-70K) (snRNP70)	0.937871	2.5E+07|3.9E+07|3.8E+07	1.01523e+08	3.38411e+07	3	2.6E+07|2.7E+07|2.8E+07	8.02569e+07	2.67523e+07	3	0.2328	1.26498	0.2057	MQ	q	I
1266	4104_ML_FinalNorm	AR-WT-0000DHT	P08621	SNRNP70	U1 small nuclear ribonucleoprotein 70 kDa (U1 snRNP 70 kDa) (U1-70K) (snRNP70)	0.937871	1.9E+06|8.5E+05|1.1E+06	3.87934e+06	1.29311e+06	3	2.6E+07|2.7E+07|2.8E+07	8.02569e+07	2.67523e+07	3	0.0048	0.0483366	0.5481	MQ	q	I
1267	4104_ML_FinalNorm	AR-WT-0060DHT	P08621	SNRNP70	U1 small nuclear ribonucleoprotein 70 kDa (U1 snRNP 70 kDa) (U1-70K) (snRNP70)	0.937871	7.4E+05|1.1E+06|NAN	1.79411e+06	897054	3	2.6E+07|2.7E+07|2.8E+07	8.02569e+07	2.67523e+07	3	0.0023	0.0335318	0.5825	MQ	q	I
1268	4104_ML_FinalNorm	AR-22Y-0000DHT	P08651	NFIC	Nuclear factor 1 C-type (NF1-C) (Nuclear factor 1/C) (CCAAT-box-binding transcription factor) (CTF) (Nuclear factor I/C) (NF-I/C) (NFI-C) (TGGCA-binding protein)	0.759102	NAN|NAN|1.5E+06	1.46241e+06	1.46241e+06	3	1.7E+06|3.0E+06|2.7E+06	7.51953e+06	2.50651e+06	3	0.0155	0.583446	0.4569	MQ	q	I
1269	4104_ML_FinalNorm	AR-22Y-0060DHT	P08651	NFIC	Nuclear factor 1 C-type (NF1-C) (Nuclear factor 1/C) (CCAAT-box-binding transcription factor) (CTF) (Nuclear factor I/C) (NF-I/C) (NFI-C) (TGGCA-binding protein)	0.759102	2.7E+06|1.5E+06|3.9E+06	8.08013e+06	2.69338e+06	3	1.7E+06|3.0E+06|2.7E+06	7.51953e+06	2.50651e+06	3	0.1153	1.07455	0.2558	MQ	q	I
1270	4104_ML_FinalNorm	AR-WT-0000DHT	P08651	NFIC	Nuclear factor 1 C-type (NF1-C) (Nuclear factor 1/C) (CCAAT-box-binding transcription factor) (CTF) (Nuclear factor I/C) (NF-I/C) (NFI-C) (TGGCA-binding protein)	0.759102	4.2E+06|5.1E+06|4.6E+06	1.38975e+07	4.63249e+06	3	1.7E+06|3.0E+06|2.7E+06	7.51953e+06	2.50651e+06	3	0.4952	1.84818	0.0968	MQ	q	I
1271	4104_ML_FinalNorm	AR-WT-0060DHT	P08651	NFIC	Nuclear factor 1 C-type (NF1-C) (Nuclear factor 1/C) (CCAAT-box-binding transcription factor) (CTF) (Nuclear factor I/C) (NF-I/C) (NFI-C) (TGGCA-binding protein)	0.759102	5.8E+07|4.9E+07|4.8E+07	1.54667e+08	5.15557e+07	3	1.7E+06|3.0E+06|2.7E+06	7.51953e+06	2.50651e+06	3	1	20.5687	0	MQ	q	I
1272	4104_ML_FinalNorm	AR-22Y-0000DHT	P08670	VIM	Vimentin	0.994368	2.4E+09|2.2E+09|2.3E+09	6.92965e+09	2.30988e+09	3	6.0E+09|6.7E+09|6.4E+09	1.90635e+10	6.35449e+09	3	0.0023	0.363504	0.5825	MQ	q	I
1273	4104_ML_FinalNorm	AR-22Y-0060DHT	P08670	VIM	Vimentin	0.994368	3.4E+09|3.5E+09|3.1E+09	9.98852e+09	3.32951e+09	3	6.0E+09|6.7E+09|6.4E+09	1.90635e+10	6.35449e+09	3	0.0065	0.523961	0.53	MQ	q	I
1274	4104_ML_FinalNorm	AR-WT-0000DHT	P08670	VIM	Vimentin	0.994368	4.0E+09|4.2E+09|4.4E+09	1.2582e+10	4.194e+09	3	6.0E+09|6.7E+09|6.4E+09	1.90635e+10	6.35449e+09	3	0.0114	0.660005	0.4874	MQ	q	I
1275	4104_ML_FinalNorm	AR-WT-0060DHT	P08670	VIM	Vimentin	0.994368	3.3E+09|3.6E+09|3.7E+09	1.05587e+10	3.51955e+09	3	6.0E+09|6.7E+09|6.4E+09	1.90635e+10	6.35449e+09	3	0.0074	0.553868	0.5211	MQ	q	I
1276	4104_ML_FinalNorm	AR-22Y-0000DHT	P08708	RPS17	40S ribosomal protein S17 (Small ribosomal subunit protein eS17)	0.964459	9.0E+07|8.0E+07|7.5E+07	2.46136e+08	8.20454e+07	3	4.5E+07|5.0E+07|5.2E+07	1.46952e+08	4.89841e+07	3	0.8058	1.67494	0.0143	MQ	q	I
1277	4104_ML_FinalNorm	AR-22Y-0060DHT	P08708	RPS17	40S ribosomal protein S17 (Small ribosomal subunit protein eS17)	0.964459	1.1E+08|1.0E+08|8.7E+07	3.02755e+08	1.00918e+08	3	4.5E+07|5.0E+07|5.2E+07	1.46952e+08	4.89841e+07	3	0.9898	2.06022	0.0004	MQ	q	I
1278	4104_ML_FinalNorm	AR-WT-0000DHT	P08708	RPS17	40S ribosomal protein S17 (Small ribosomal subunit protein eS17)	0.964459	1.8E+06|3.9E+06|1.6E+06	7.27917e+06	2.42639e+06	3	4.5E+07|5.0E+07|5.2E+07	1.46952e+08	4.89841e+07	3	0.007	0.0495342	0.5258	MQ	q	I
1279	4104_ML_FinalNorm	AR-WT-0060DHT	P08708	RPS17	40S ribosomal protein S17 (Small ribosomal subunit protein eS17)	0.964459	1.6E+06|3.6E+06|3.1E+05	5.42367e+06	1.80789e+06	3	4.5E+07|5.0E+07|5.2E+07	1.46952e+08	4.89841e+07	3	0.0053	0.0369077	0.5421	MQ	q	I
[truncated: 6,223 more rows]

## Sheet: Data summary
	AR-WT-tDHT0				AR-WT-tDHT60				AR-22Y-tDHT0				AR-22Y-tDHT60
Row Labels	T mean	C mean	FC	BFDR	T mean	C mean	FC	BFDR	T mean	C mean	FC	BFDR	T mean	C mean	FC	BFDR
[truncated: 2,370 more rows]

## Sheet: WT Top75 GO
GO enrichments of the Top75 hits (BFDR≤0.02, FC≥3) in FLAG-MTID-WT-AR TDHT60 samples generated using STRING. Categories highlighted in the graph are shown in blue.
[truncated: 170 more rows]

[truncated: 1 more sheets: Y22S Top75 GO]
