# Supplementary material for: Rational optimization of a transcription factor activation domain inhibitor
Source: Nat Struct Mol Biol. 2023 Dec 4;30(12):1958–69. doi: 10.1038/s41594-023-01159-5 (PMC10716049; doi:10.1038/s41594-023-01159-5)
Supplement: Supplementary file 8 — BioID-MS data corresponding to Fig. 5 and Extended Data Fig. 6. The Bait tab contains the bait IDs used for SAINTq analysis and the SAINTq output tab is the analysis output. The data summary is a pivot table generated from the output data. Fold change in small-molecule inhibitor-treated versus DMSO-treated LNCaP MTID-AR-WT cells. The GO tab refers to most depleted proteins versus DMSO with a P ≤ 0.05 and a FC ≥ −1.5. [file 41594_2023_1159_MOESM8_ESM.xlsx]

## Sheet: 24h_1ae_5uM_vsDMSO
GeneID	Gene	baseMean	log2FoldChange	pvalue	padj
ENSG00000142515	KLK3	17049.7	-2.28316	0	0
ENSG00000167034	NKX3-1	13334.4	-1.83999	0	0
ENSG00000167751	KLK2	5507.81	-2.86994	0	0
ENSG00000169122	FAM110B	1453.78	-1.4366	2.61361e-216	1.35163e-212
ENSG00000198648	STK39	3850.22	-1.1989	7.75365e-214	3.20784e-210
ENSG00000158715	SLC45A3	7519.29	-1.49837	2.69798e-212	9.30175e-209
ENSG00000168209	DDIT4	3958.04	1.91065	3.45509e-205	1.02103e-201
ENSG00000182795	C1orf116	6975.32	-1.12409	7.96888e-201	2.06055e-197
ENSG00000124225	PMEPA1	4172.04	-1.63821	7.39065e-197	1.6987e-193
ENSG00000155657	TTN	763.523	-5.3917	9.65873e-192	1.998e-188
ENSG00000103257	SLC7A5	1822.73	1.76468	2.96348e-186	5.57297e-183
ENSG00000151025	GPR158	3940.1	-1.34775	5.57253e-186	9.60611e-183
ENSG00000104738	MCM4	7890.14	-0.946832	6.37099e-183	1.01377e-179
ENSG00000184012	TMPRSS2	3565.38	-1.44065	4.22946e-180	6.24934e-177
ENSG00000070669	ASNS	5194.02	1.67127	1.67164e-177	2.30531e-174
ENSG00000120903	CHRNA2	879.96	-2.81281	2.77964e-174	3.59373e-171
ENSG00000124788	ATXN1	758.149	1.71277	3.78307e-171	4.60333e-168
ENSG00000137801	THBS1	1123.99	-1.83323	2.62432e-158	3.01592e-155
ENSG00000096060	FKBP5	3471.3	-1.81909	8.08854e-158	8.80629e-155
ENSG00000103942	HOMER2	5312.61	-0.827817	9.94196e-149	1.0283e-145
ENSG00000106105	GARS	8018.64	0.945227	2.2761e-142	2.24206e-139
ENSG00000144481	TRPM8	1022.72	-1.89049	2.96009e-142	2.78329e-139
ENSG00000070526	ST6GALNAC1	1544.12	-2.03664	1.52681e-141	1.3732e-138
ENSG00000116574	RHOU	1564.41	-1.35016	3.36723e-136	2.90227e-133
ENSG00000135842	FAM129A	580.454	2.03601	2.02668e-135	1.67695e-132
ENSG00000144331	ZNF385B	1478.53	-1.23057	1.77055e-132	1.40868e-129
ENSG00000100889	PCK2	3854.94	1.55659	1.10944e-125	8.49994e-123
ENSG00000151503	NCAPD3	5598.82	-0.890843	7.43701e-124	5.49436e-121
ENSG00000140443	IGF1R	6656.11	-1.43626	2.91873e-122	2.08196e-119
ENSG00000118985	ELL2	3594.42	-1.44254	2.45059e-121	1.68976e-118
ENSG00000164045	CDC25A	2017.39	-1.06742	4.85694e-119	3.24099e-116
ENSG00000163492	CCDC141	217.154	-5.3898	6.57369e-119	4.24948e-116
ENSG00000135862	LAMC1	9983.69	-0.786525	3.298e-116	2.06735e-113
ENSG00000144339	TMEFF2	1729.08	-1.27027	1.52053e-115	9.2511e-113
ENSG00000166451	CENPN	2512.07	-1.22537	2.25309e-111	1.33164e-108
ENSG00000151012	SLC7A11	4468.46	2.07009	8.91223e-109	5.12107e-106
ENSG00000106070	GRB10	19411.5	0.891	5.47723e-108	3.06221e-105
ENSG00000144218	AFF3	1453.91	-1.43791	5.90956e-106	3.21698e-103
ENSG00000162545	CAMK2N1	756.127	1.64776	9.53293e-106	5.05636e-103
ENSG00000163110	PDLIM5	4298.44	-0.749081	7.97586e-105	4.12471e-102
ENSG00000151726	ACSL1	3742.49	0.887427	1.71671e-102	8.66141e-100
ENSG00000069206	ADAM7	460.337	-2.31073	2.51928e-100	1.24081e-97
ENSG00000182319	NA	475.25	-2.2015	9.47861e-100	4.55987e-97
ENSG00000150403	TMCO3	2177.47	0.882461	2.72247e-98	1.27993e-95
ENSG00000153179	RASSF3	17946	-1.03084	4.15682e-98	1.91084e-95
ENSG00000135069	PSAT1	7931.12	1.18114	1.38294e-97	6.21902e-95
ENSG00000065328	MCM10	2293.84	-0.983338	1.79549e-95	7.90246e-93
ENSG00000116062	MSH6	2728.51	-0.81296	1.87853e-95	8.09568e-93
ENSG00000139289	PHLDA1	951.208	-1.29938	3.91177e-92	1.6514e-89
ENSG00000091490	SEL1L3	4452.33	0.749426	4.93076e-92	2.03995e-89
ENSG00000196517	SLC6A9	582.112	1.53812	5.81296e-89	2.35778e-86
ENSG00000128965	CHAC1	432.786	2.39641	1.44973e-88	5.76713e-86
ENSG00000255353	AP003057.1	591.717	-1.68302	3.13934e-88	1.22529e-85
ENSG00000198734	F5	292.54	-2.73255	6.86775e-86	2.63086e-83
ENSG00000125257	ABCC4	5579.74	-1.29775	2.96214e-85	1.11409e-82
ENSG00000157600	TMEM164	3368.66	-0.938449	3.06211e-85	1.13112e-82
ENSG00000130338	TULP4	2319.58	0.925505	5.97096e-85	2.16694e-82
ENSG00000101680	LAMA1	164.48	-3.15305	2.24252e-84	7.99808e-82
ENSG00000080709	KCNN2	4952.14	-0.914553	6.64012e-84	2.32809e-81
ENSG00000157514	TSC22D3	899.099	1.60373	7.67391e-84	2.64571e-81
ENSG00000138641	HERC3	7235.46	-1.04489	1.56483e-83	5.30656e-81
ENSG00000123983	ACSL3	6158.63	-1.03744	4.71182e-83	1.57208e-80
ENSG00000183117	CSMD1	2275.18	1.0838	4.35269e-82	1.4292e-79
ENSG00000135090	TAOK3	3634.43	-0.871659	1.08135e-81	3.49513e-79
ENSG00000175197	DDIT3	610.778	1.76323	4.8502e-79	1.54356e-76
ENSG00000166750	SLFN5	1460.49	1.20474	1.426e-75	4.46944e-73
ENSG00000117461	PIK3R3	5258.54	0.665068	8.95465e-75	2.76471e-72
ENSG00000175928	LRRN1	1730.83	1.1475	9.53332e-75	2.90009e-72
ENSG00000113368	LMNB1	6293.78	-0.64399	9.15576e-74	2.74487e-71
ENSG00000178573	MAF	198.414	-2.34026	1.54813e-73	4.57494e-71
ENSG00000130513	GDF15	3393.21	1.6004	2.10866e-73	6.14363e-71
ENSG00000002834	LASP1	3086.24	0.919265	3.19707e-73	9.18535e-71
ENSG00000117595	IRF6	1843.17	0.919444	5.66538e-73	1.6054e-70
ENSG00000104356	POP1	1443.44	-0.915715	3.69252e-72	1.03221e-69
ENSG00000065911	MTHFD2	4616.24	0.766741	1.40901e-71	3.88622e-69
ENSG00000196208	GREB1	1051.82	-1.61009	3.11733e-71	8.48488e-69
ENSG00000145569	OTULINL	789.291	-1.46685	3.8813e-71	1.04271e-68
ENSG00000166348	USP54	10708.1	0.65007	4.74436e-71	1.25823e-68
ENSG00000166224	SGPL1	3348.21	0.614152	4.90658e-71	1.28478e-68
ENSG00000144476	ACKR3	2098.74	1.07125	1.35558e-70	3.50519e-68
ENSG00000104081	BMF	879.541	1.04007	1.54394e-70	3.94296e-68
ENSG00000179104	TMTC2	1427.06	-1.00881	1.85752e-68	4.68593e-66
ENSG00000136783	NIPSNAP3A	1414.91	1.34867	3.1781e-68	7.92073e-66
ENSG00000125266	EFNB2	1148.79	-1.09443	5.63609e-67	1.38795e-64
ENSG00000140526	ABHD2	25298.1	-0.810582	2.80393e-66	6.82376e-64
ENSG00000224259	LINC01133	189.583	2.58798	3.45661e-66	8.31435e-64
ENSG00000168411	RFWD3	2178.18	-0.693827	5.58943e-66	1.329e-63
ENSG00000155846	PPARGC1B	1350.52	-1.10652	3.76938e-65	8.86061e-63
ENSG00000115902	SLC1A4	684.286	1.15142	1.81632e-63	4.22161e-61
ENSG00000198417	MT1F	165.623	2.75481	1.25473e-62	2.88393e-60
ENSG00000070081	NUCB2	1530.46	1.30507	2.11241e-62	4.80191e-60
ENSG00000122952	ZWINT	2567.57	-0.765249	2.68436e-62	6.03574e-60
ENSG00000130766	SESN2	1486.15	1.24712	2.97092e-62	6.60821e-60
ENSG00000101255	TRIB3	2626.12	1.30602	2.1482e-61	4.72741e-59
ENSG00000176890	TYMS	4473.74	-0.753835	3.47351e-61	7.56348e-59
ENSG00000145779	TNFAIP8	529.357	-1.41494	3.06073e-60	6.59523e-58
ENSG00000149218	ENDOD1	13756.9	-0.711694	1.94626e-59	4.15055e-57
ENSG00000163683	SMIM14	1221.07	1.10382	4.79171e-59	1.01144e-56
ENSG00000145703	IQGAP2	1493.99	-1.20683	6.46097e-59	1.35002e-56
ENSG00000163251	FZD5	1581.11	-0.93556	3.40007e-58	7.03338e-56
ENSG00000167749	KLK4	1522.3	-1.24732	2.86426e-57	5.86634e-55
ENSG00000120875	DUSP4	533.042	-1.25023	9.37316e-57	1.90091e-54
ENSG00000128641	MYO1B	3208.06	-0.944211	1.18903e-56	2.38799e-54
ENSG00000116584	ARHGEF2	1134.93	1.1653	2.78707e-55	5.54358e-53
ENSG00000132437	DDC	3642.51	0.848872	3.83966e-55	7.5645e-53
ENSG00000168496	FEN1	4051.5	-0.895135	8.84129e-55	1.72539e-52
ENSG00000108179	PPIF	7605.83	-0.760493	9.76564e-55	1.88796e-52
ENSG00000224186	C5orf66	427.358	1.4027	1.00088e-54	1.91706e-52
ENSG00000071539	TRIP13	1863.85	-0.658105	2.8252e-54	5.36166e-52
ENSG00000156802	ATAD2	7119.03	-1.01659	6.17835e-54	1.16187e-51
ENSG00000124145	SDC4	1759.02	0.973993	9.56841e-54	1.78317e-51
ENSG00000117139	KDM5B	3767.75	0.597701	1.3146e-53	2.42801e-51
ENSG00000094804	CDC6	2813.41	-0.686954	2.28981e-53	4.19177e-51
ENSG00000049449	RCN1	3058.76	0.56911	2.6431e-53	4.79607e-51
ENSG00000093009	CDC45	1423.76	-0.81083	2.93034e-53	5.27105e-51
ENSG00000103222	ABCC1	6084.64	-0.758099	3.08093e-53	5.49414e-51
ENSG00000085999	RAD54L	1459.4	-0.938412	3.33114e-53	5.88957e-51
ENSG00000171848	RRM2	6124.02	-0.811481	9.31692e-53	1.6333e-50
ENSG00000100297	MCM5	3634.1	-0.838457	1.35807e-52	2.36076e-50
ENSG00000186185	KIF18B	1960.16	-0.935205	2.09154e-52	3.60547e-50
ENSG00000116991	SIPA1L2	2068.97	-0.690135	4.62617e-52	7.90884e-50
ENSG00000145220	LYAR	982.281	-0.956571	1.33636e-51	2.26589e-49
ENSG00000076248	UNG	2214.27	-0.727028	3.31007e-51	5.56683e-49
ENSG00000167747	C19orf48	8619.18	-1.0496	3.53685e-51	5.90026e-49
ENSG00000151690	MFSD6	1221.56	0.840109	4.76423e-51	7.88423e-49
ENSG00000111912	NCOA7	818.065	1.05653	9.11569e-51	1.49657e-48
ENSG00000111696	NT5DC3	1184.31	-0.997017	9.73457e-50	1.58558e-47
ENSG00000153879	CEBPG	1949.51	0.832431	1.35384e-49	2.18793e-47
ENSG00000166387	PPFIBP2	1679.03	-0.803705	2.49004e-49	3.99295e-47
ENSG00000123374	CDK2	3141.74	-0.695911	3.43447e-49	5.46503e-47
ENSG00000131844	MCCC2	4371.67	-0.608815	7.23651e-49	1.14271e-46
ENSG00000189221	MAOA	17356.5	-0.607128	7.67916e-49	1.20342e-46
ENSG00000162174	ASRGL1	1187.28	-1.09959	1.25568e-48	1.95301e-46
ENSG00000143476	DTL	1759.21	-0.920621	1.56382e-48	2.41412e-46
ENSG00000128165	ADM2	1112.78	1.24743	3.5073e-48	5.37423e-46
ENSG00000049759	NEDD4L	7906.02	-0.519154	1.93551e-47	2.94396e-45
ENSG00000140105	WARS	3972.1	0.569439	1.97995e-47	2.98959e-45
ENSG00000085840	ORC1	1296.23	-0.867424	2.33747e-47	3.50384e-45
ENSG00000163406	SLC15A2	140.739	-2.15566	3.26836e-47	4.86398e-45
ENSG00000137501	SYTL2	755.998	1.22607	6.0971e-47	9.00891e-45
ENSG00000009694	TENM1	528.581	-1.9009	1.50277e-46	2.2047e-44
ENSG00000143797	MBOAT2	5605.44	-1.18337	1.83769e-46	2.67708e-44
ENSG00000076003	MCM6	3627.86	-0.725238	2.37357e-46	3.43354e-44
ENSG00000144354	CDCA7	700.892	-0.949398	2.74802e-46	3.9476e-44
ENSG00000086205	FOLH1	26361	0.622177	3.54243e-46	5.05371e-44
ENSG00000171793	CTPS1	3252.92	-0.565647	4.18225e-46	5.92562e-44
ENSG00000014257	ACPP	645.56	1.03173	9.24729e-46	1.30129e-43
ENSG00000134333	LDHA	20814.1	-0.633418	9.92812e-46	1.38766e-43
ENSG00000169213	RAB3B	4197.35	-0.689002	1.43249e-45	1.98876e-43
ENSG00000164120	HPGD	121.758	-2.67587	1.71429e-45	2.36412e-43
ENSG00000146859	TMEM140	210.07	1.7345	2.08252e-45	2.85292e-43
ENSG00000095319	NUP188	6107.15	-0.548796	3.27061e-45	4.45104e-43
ENSG00000138092	CENPO	1769.52	-0.706283	4.46329e-45	6.03448e-43
ENSG00000116133	DHCR24	24603.5	-0.684609	1.15721e-44	1.55441e-42
ENSG00000118655	DCLRE1B	862.281	-0.810104	1.68428e-44	2.24781e-42
ENSG00000167721	TSR1	4587.59	-0.679078	2.23264e-44	2.96053e-42
ENSG00000143158	MPC2	8469.31	-0.862402	3.49593e-44	4.60617e-42
ENSG00000188807	TMEM201	1894.45	-0.834385	4.38e-44	5.73448e-42
ENSG00000109906	ZBTB16	1952.43	-1.53244	4.5484e-44	5.9175e-42
ENSG00000160208	RRP1B	2644.72	-0.584809	5.07416e-44	6.56026e-42
ENSG00000197822	OCLN	814.451	0.851526	7.18772e-44	9.23511e-42
ENSG00000008513	ST3GAL1	29874.2	0.459327	8.87075e-44	1.13272e-41
ENSG00000138696	BMPR1B	311.501	-1.41209	1.11838e-43	1.41932e-41
ENSG00000185630	PBX1	554.075	1.20949	1.25621e-43	1.58451e-41
ENSG00000010292	NCAPD2	9348.09	-0.560045	2.26985e-43	2.8457e-41
ENSG00000136868	SLC31A1	4058.86	0.616352	3.74285e-43	4.66414e-41
ENSG00000099194	SCD	12115.6	0.661557	4.00529e-43	4.96128e-41
ENSG00000109452	INPP4B	530.48	-1.23014	4.8784e-43	6.00683e-41
ENSG00000197888	UGT2B17	2234.09	1.14623	6.45943e-43	7.9065e-41
ENSG00000129173	E2F8	770.615	-0.974068	1.21977e-42	1.48424e-40
ENSG00000154035	NA	162.767	1.83966	2.94034e-42	3.55695e-40
ENSG00000134765	DSC1	97.2719	-2.64527	4.04701e-42	4.86723e-40
ENSG00000117143	UAP1	8424.42	-0.814774	4.4377e-42	5.30626e-40
ENSG00000104447	TRPS1	1934.64	0.747601	4.55734e-42	5.418e-40
ENSG00000148840	PPRC1	3433.29	-0.752003	5.89816e-42	6.97196e-40
ENSG00000088325	TPX2	6100.79	-0.490666	6.25079e-42	7.32393e-40
ENSG00000111490	TBC1D30	2219.93	-0.645893	6.26673e-42	7.32393e-40
ENSG00000196620	UGT2B15	718.628	1.27102	9.85015e-42	1.14472e-39
ENSG00000168159	RNF187	8936.34	0.95159	1.0227e-41	1.18187e-39
ENSG00000111845	PAK1IP1	1073.99	-0.939962	1.08774e-41	1.25005e-39
ENSG00000129474	AJUBA	1076.55	1.0569	1.18715e-41	1.35676e-39
ENSG00000035862	TIMP2	804.997	0.942808	1.51362e-41	1.72037e-39
ENSG00000154122	ANKH	3082.32	-0.55718	1.64473e-41	1.85918e-39
ENSG00000078114	NEBL	477.51	1.52147	2.12354e-41	2.38737e-39
ENSG00000114796	KLHL24	1033.18	1.15569	2.15735e-41	2.41227e-39
ENSG00000164938	TP53INP1	7497.65	1.23854	2.3093e-41	2.56829e-39
ENSG00000136478	TEX2	2323.19	-0.561225	2.80841e-41	3.10667e-39
ENSG00000147454	SLC25A37	3122.87	-0.56015	3.09394e-41	3.40433e-39
ENSG00000114450	GNB4	722.168	-1.24802	3.79254e-41	4.15092e-39
ENSG00000140534	TICRR	2325.72	-0.909314	4.45098e-41	4.84595e-39
ENSG00000136699	SMPD4	3843.81	-0.638734	4.70303e-41	5.09355e-39
ENSG00000166508	MCM7	8799.99	-0.786012	7.00844e-41	7.55086e-39
ENSG00000164125	FAM198B	3307.67	1.05192	8.53615e-41	9.14916e-39
ENSG00000014138	POLA2	1743.4	-0.705702	1.18691e-40	1.26559e-38
ENSG00000091651	ORC6	1272.54	-0.854202	1.78528e-40	1.89386e-38
ENSG00000179094	PER1	784.347	-1.06617	2.36804e-40	2.49925e-38
ENSG00000171388	APLN	617.606	-1.15657	2.75311e-40	2.89091e-38
ENSG00000112118	MCM3	2899.67	-0.676289	2.91255e-40	3.04288e-38
ENSG00000225255	LINC01297	198.962	-1.80629	3.94894e-40	4.10492e-38
ENSG00000100714	MTHFD1	8946.81	-0.499795	6.18713e-40	6.39935e-38
ENSG00000125148	MT2A	2768.5	1.62892	6.8481e-40	7.04775e-38
ENSG00000078018	MAP2	1078.17	-0.891333	6.94409e-40	7.11116e-38
ENSG00000037474	NSUN2	4017.73	-0.507191	8.54832e-40	8.71087e-38
ENSG00000105576	TNPO2	6263.97	-0.598908	8.5995e-40	8.72006e-38
ENSG00000104413	ESRP1	2230.34	0.805572	1.69216e-39	1.70751e-37
ENSG00000177302	TOP3A	2373.54	-0.54529	2.24237e-39	2.25173e-37
ENSG00000178999	AURKB	1384.33	-0.762452	2.53441e-39	2.5327e-37
ENSG00000109576	AADAT	2415.75	-0.811994	7.02493e-39	6.98643e-37
ENSG00000111445	RFC5	1775.48	-0.733441	7.88121e-39	7.80051e-37
ENSG00000184304	PRKD1	9066.84	0.57029	1.34102e-38	1.32096e-36
ENSG00000116667	C1orf21	1724.63	-0.543946	2.00937e-38	1.96994e-36
ENSG00000143416	SELENBP1	13453.5	0.890066	2.14716e-38	2.0951e-36
ENSG00000149260	CAPN5	216.159	1.45018	2.79537e-38	2.71479e-36
ENSG00000125885	MCM8	1919.33	-0.757404	4.04359e-38	3.90868e-36
ENSG00000183666	GUSBP1	1916.52	0.657833	6.98544e-38	6.72097e-36
ENSG00000211689	TRGC1	134.421	-2.65229	9.16403e-38	8.77626e-36
ENSG00000163950	SLBP	2568.56	-0.702705	9.23842e-38	8.80672e-36
ENSG00000169180	XPO6	7263.38	-0.421708	1.27379e-37	1.20869e-35
ENSG00000105011	ASF1B	1791.67	-0.842495	1.72411e-37	1.62854e-35
ENSG00000128272	ATF4	15024.4	0.998174	2.69793e-37	2.53679e-35
ENSG00000102172	SMS	4343.74	-0.551867	3.17679e-37	2.97353e-35
ENSG00000196756	SNHG17	1477.53	-0.653505	5.52156e-37	5.145e-35
ENSG00000172432	GTPBP2	693.087	1.15438	5.55199e-37	5.15016e-35
ENSG00000135269	TES	1878.18	0.653807	5.99951e-37	5.54044e-35
ENSG00000145687	SSBP2	420.648	1.04149	7.34039e-37	6.74859e-35
ENSG00000140263	SORD	15182.1	-0.584458	8.7944e-37	8.0496e-35
ENSG00000100219	XBP1	5582.29	0.800644	1.05288e-36	9.59464e-35
ENSG00000167513	CDT1	1409.83	-0.777383	2.16442e-36	1.96374e-34
ENSG00000197324	LRP10	3120.33	0.79387	2.70537e-36	2.44381e-34
ENSG00000065485	PDIA5	1542.49	-0.684554	3.0978e-36	2.78614e-34
ENSG00000181938	GINS3	709.603	-0.89793	3.12673e-36	2.79998e-34
ENSG00000114302	PRKAR2A	4656.38	-0.403489	3.1405e-36	2.80019e-34
ENSG00000104687	GSR	9092	-0.471619	5.39992e-36	4.79411e-34
ENSG00000156113	KCNMA1	3148.81	-0.595637	5.93403e-36	5.24579e-34
ENSG00000198805	PNP	3333.84	-0.764339	7.42608e-36	6.53685e-34
ENSG00000072210	ALDH3A2	3737.7	0.672931	1.98653e-35	1.74124e-33
ENSG00000128973	CLN6	1992.15	-0.607022	2.32193e-35	2.02664e-33
ENSG00000163697	APBB2	1210.63	0.71426	2.874e-35	2.49797e-33
ENSG00000183779	ZNF703	1786.46	0.771902	2.9797e-35	2.579e-33
ENSG00000160191	PDE9A	1553.43	-0.595618	3.94949e-35	3.40413e-33
ENSG00000073111	MCM2	6740.72	-0.996822	4.42289e-35	3.79634e-33
ENSG00000110619	CARS	2176.18	0.814582	4.48463e-35	3.83343e-33
ENSG00000125144	MT1G	121.632	2.37833	7.11401e-35	6.05598e-33
ENSG00000051108	HERPUD1	2362.03	0.624135	8.08488e-35	6.85425e-33
ENSG00000172771	EFCAB12	495.03	-1.14388	8.91385e-35	7.5262e-33
ENSG00000101447	FAM83D	2054.7	-0.708165	1.01121e-34	8.50323e-33
ENSG00000165271	NOL6	4335.04	-0.63827	1.07295e-34	8.98589e-33
ENSG00000169813	HNRNPF	13310	-0.530731	1.16272e-34	9.69837e-33
ENSG00000111275	ALDH2	358.631	1.07498	1.28477e-34	1.06734e-32
ENSG00000198793	MTOR	5461.83	-0.576777	1.57693e-34	1.30481e-32
ENSG00000143319	ISG20L2	3290.7	-0.610068	1.61117e-34	1.32784e-32
ENSG00000031698	SARS	5413.52	0.790928	1.64352e-34	1.34379e-32
ENSG00000147536	GINS4	1254.4	-0.659966	1.64014e-34	1.34379e-32
ENSG00000177000	MTHFR	1210.45	0.613732	1.84395e-34	1.50173e-32
ENSG00000187741	FANCA	1279.36	-0.69114	1.86484e-34	1.51279e-32
ENSG00000104419	NDRG1	2398.85	-0.681427	2.56432e-34	2.07209e-32
ENSG00000164181	ELOVL7	5246.75	-1.42799	2.98536e-34	2.39879e-32
ENSG00000182481	KPNA2	5914.66	-0.527801	2.99182e-34	2.39879e-32
ENSG00000111266	DUSP16	2507.55	0.485351	3.03042e-34	2.42036e-32
ENSG00000189056	RELN	401.371	1.37076	4.3363e-34	3.45002e-32
ENSG00000151883	PARP8	1327.21	0.871076	5.01207e-34	3.9724e-32
ENSG00000132824	SERINC3	4343.98	0.515573	5.16308e-34	4.07647e-32
ENSG00000128245	YWHAH	2076.33	-0.593655	6.95827e-34	5.47295e-32
ENSG00000112984	KIF20A	2818.22	-0.732271	8.69889e-34	6.8161e-32
ENSG00000105612	DNASE2	1352.82	0.955202	1.19538e-33	9.33116e-32
ENSG00000171241	SHCBP1	1556.81	-0.654448	1.60313e-33	1.24671e-31
ENSG00000169252	ADRB2	970.601	-0.805019	2.21553e-33	1.7165e-31
ENSG00000154734	ADAMTS1	14561.8	-0.419881	2.28103e-33	1.76065e-31
ENSG00000102780	DGKH	7387.7	1.02766	2.3299e-33	1.79168e-31
ENSG00000131504	DIAPH1	9835.6	-0.479854	4.04159e-33	3.09646e-31
ENSG00000134240	HMGCS2	603.217	1.01417	5.1456e-33	3.92774e-31
ENSG00000142207	URB1	3207.59	-0.534341	6.18853e-33	4.70647e-31
ENSG00000186591	UBE2H	3846.24	0.416302	6.57329e-33	4.98078e-31
ENSG00000075886	TUBA3D	58.8209	-3.5676	6.98619e-33	5.27432e-31
ENSG00000132646	PCNA	4786.21	-0.720757	1.03535e-32	7.78813e-31
ENSG00000184349	EFNA5	10686.3	-0.515356	1.16679e-32	8.74502e-31
ENSG00000171316	CHD7	1690.93	-0.655483	1.19827e-32	8.94853e-31
ENSG00000197321	SVIL	489.882	1.14284	1.27643e-32	9.49795e-31
ENSG00000108424	KPNB1	18255.4	-0.421107	1.35516e-32	1.00476e-30
ENSG00000165304	MELK	2126	-0.60363	1.48196e-32	1.09485e-30
ENSG00000113739	STC2	2149.9	0.931976	1.85808e-32	1.36784e-30
ENSG00000082516	GEMIN5	1846.77	-0.558869	2.11682e-32	1.55279e-30
ENSG00000136689	IL1RN	167.612	1.65887	2.3054e-32	1.68514e-30
ENSG00000140396	NCOA2	4051.5	0.500282	4.33677e-32	3.15882e-30
ENSG00000005469	CROT	1046.92	-1.04057	5.59586e-32	4.06162e-30
ENSG00000166780	C16orf45	186.68	1.55945	6.48232e-32	4.68858e-30
ENSG00000131153	GINS2	1024.68	-0.849777	1.03317e-31	7.44674e-30
ENSG00000139112	GABARAPL1	783.045	0.786744	1.04423e-31	7.50029e-30
ENSG00000121152	NCAPH	1922.34	-0.674387	1.05155e-31	7.52679e-30
ENSG00000078699	CBFA2T2	2751.04	0.589054	1.05957e-31	7.55801e-30
ENSG00000090621	PABPC4	8156.34	-0.378402	1.18095e-31	8.39486e-30
ENSG00000138771	SHROOM3	7714.3	-0.480335	2.31347e-31	1.63892e-29
ENSG00000187398	LUZP2	2254.06	0.704664	2.50567e-31	1.76902e-29
ENSG00000100647	SUSD6	1653.06	0.664175	2.81703e-31	1.98208e-29
ENSG00000140525	FANCI	4564.65	-0.561809	2.97372e-31	2.08523e-29
ENSG00000166446	CDYL2	1757.98	-0.594809	3.06041e-31	2.13877e-29
ENSG00000067113	PLPP1	4244.55	-0.532816	3.07738e-31	2.14339e-29
ENSG00000143164	DCAF6	4863.56	-0.511995	4.64842e-31	3.22675e-29
ENSG00000107937	GTPBP4	4438.93	-0.585001	4.90876e-31	3.39608e-29
ENSG00000162772	ATF3	882.871	0.913542	5.23787e-31	3.61169e-29
ENSG00000111837	MAK	110.577	-1.91096	5.28906e-31	3.63487e-29
ENSG00000075218	GTSE1	1616.83	-0.55476	6.55011e-31	4.48661e-29
ENSG00000070961	ATP2B1	5208.23	0.91855	6.65395e-31	4.54269e-29
ENSG00000160145	KALRN	491.101	1.13296	7.05001e-31	4.79725e-29
ENSG00000243081	AC092894.1	99.6	2.02088	7.18561e-31	4.87349e-29
ENSG00000065833	ME1	1506.76	0.813713	1.00941e-30	6.82377e-29
ENSG00000130713	EXOSC2	2716.61	-0.55153	1.12399e-30	7.57356e-29
ENSG00000163171	CDC42EP3	1451.33	-0.692339	1.35735e-30	9.11627e-29
ENSG00000175155	YPEL2	370.219	1.07109	1.57715e-30	1.05582e-28
ENSG00000076382	SPAG5	4136.6	-0.570197	1.73216e-30	1.15585e-28
ENSG00000197451	HNRNPAB	5457.81	-0.753197	1.77121e-30	1.17811e-28
ENSG00000261061	AC092718.4	335.452	-1.34653	2.43081e-30	1.61166e-28
ENSG00000236404	VLDLR-AS1	74.2253	2.1855	2.44279e-30	1.61443e-28
ENSG00000138764	CCNG2	1623.95	1.21514	2.62084e-30	1.72658e-28
ENSG00000110104	CCDC86	3482.33	-0.803082	2.72888e-30	1.79205e-28
ENSG00000177602	HASPIN	925.391	-0.681386	2.97011e-30	1.94429e-28
ENSG00000071242	RPS6KA2	1741.17	0.653906	3.42221e-30	2.23318e-28
ENSG00000101057	MYBL2	4904.06	-0.734626	3.81016e-30	2.47852e-28
ENSG00000108932	SLC16A6	174.619	-1.48632	4.26551e-30	2.76603e-28
ENSG00000166741	NNMT	146.12	-1.85327	5.50228e-30	3.55688e-28
ENSG00000142864	SERBP1	15574.4	-0.403675	6.42064e-30	4.13761e-28
ENSG00000139182	CLSTN3	1247.55	0.801098	6.63653e-30	4.26346e-28
ENSG00000120907	ADRA1A	65.1879	2.29344	7.4086e-30	4.74471e-28
ENSG00000135763	URB2	1347.81	-0.701953	9.01027e-30	5.75267e-28
ENSG00000269343	ZNF587B	1855.85	-0.649094	9.43195e-30	6.00336e-28
ENSG00000224689	ZNF812P	131.839	-1.80811	1.35804e-29	8.61728e-28
ENSG00000146477	SLC22A3	9494.18	0.443388	1.40869e-29	8.91134e-28
ENSG00000156398	SFXN2	1926.66	-0.52569	1.44035e-29	9.08385e-28
ENSG00000113407	TARS	9609.59	0.469555	1.52588e-29	9.59401e-28
ENSG00000162063	CCNF	1906.05	-0.725637	1.61259e-29	1.01085e-27
ENSG00000099942	CRKL	4333.14	-0.393558	1.6412e-29	1.02568e-27
ENSG00000103121	CMC2	1444.02	-0.768232	1.65423e-29	1.0307e-27
ENSG00000161800	RACGAP1	3302.87	-0.47583	1.84099e-29	1.14279e-27
ENSG00000196470	SIAH1	922.039	0.711675	1.84517e-29	1.14279e-27
ENSG00000141076	UTP4	2423.75	-0.627248	2.27846e-29	1.40693e-27
ENSG00000012660	ELOVL5	5594.48	-0.736104	3.57511e-29	2.20104e-27
ENSG00000126215	XRCC3	1499.61	-0.840097	3.5974e-29	2.20818e-27
ENSG00000184408	KCND2	202.64	-1.4898	3.92434e-29	2.40174e-27
ENSG00000137337	MDC1	1063.17	-0.877839	4.00466e-29	2.44367e-27
ENSG00000143179	UCK2	3330.38	-0.525665	4.21142e-29	2.56228e-27
ENSG00000116299	KIAA1324	285.779	1.08683	4.86822e-29	2.95319e-27
ENSG00000174371	EXO1	1033.28	-0.795745	5.15048e-29	3.11529e-27
ENSG00000087586	AURKA	2022.56	-0.516201	5.20773e-29	3.14073e-27
ENSG00000169155	ZBTB43	1349.55	0.57228	5.66898e-29	3.40897e-27
ENSG00000149532	CPSF7	4580.69	-0.503407	5.71016e-29	3.42378e-27
ENSG00000127564	PKMYT1	1348.44	-0.808095	6.06204e-29	3.62426e-27
ENSG00000139209	SLC38A4	42.6983	-4.83826	6.276e-29	3.74136e-27
ENSG00000165244	ZNF367	771.448	-0.925433	6.81043e-29	4.04829e-27
ENSG00000166173	LARP6	365.534	1.02686	6.83134e-29	4.04909e-27
ENSG00000134690	CDCA8	1911.25	-0.618172	6.89503e-29	4.07516e-27
ENSG00000110108	TMEM109	4256.96	-0.682285	7.92217e-29	4.66889e-27
ENSG00000133065	SLC41A1	2779.8	-0.541654	1.08825e-28	6.39531e-27
ENSG00000136854	STXBP1	1428.04	0.580108	1.22142e-28	7.15757e-27
ENSG00000219481	NBPF1	4477.82	0.587665	1.23054e-28	7.19067e-27
ENSG00000146670	CDCA5	2628.68	-0.645001	1.6819e-28	9.80051e-27
ENSG00000135373	EHF	12157.3	-0.550592	1.70327e-28	9.89717e-27
ENSG00000167552	TUBA1A	1389.09	0.884608	1.74045e-28	1.00849e-26
ENSG00000135372	NAT10	3953.09	-0.447872	2.22235e-28	1.28055e-26
ENSG00000140332	TLE3	7771.66	0.583233	2.22138e-28	1.28055e-26
ENSG00000065882	TBC1D1	3072.95	-0.471353	2.69628e-28	1.54931e-26
ENSG00000181026	AEN	2438.14	-0.599719	3.04518e-28	1.74494e-26
ENSG00000147324	MFHAS1	1846.34	-0.499627	3.45708e-28	1.9755e-26
ENSG00000196793	ZNF239	1007.1	-0.633837	3.64369e-28	2.0764e-26
ENSG00000154144	TBRG1	3999.7	-0.462851	3.94368e-28	2.24118e-26
ENSG00000145604	SKP2	2139.65	-0.844091	4.24972e-28	2.40849e-26
ENSG00000181634	TNFSF15	397.423	1.04394	5.03705e-28	2.8469e-26
ENSG00000092964	DPYSL2	1815.86	0.571099	5.39435e-28	3.04053e-26
ENSG00000113742	CPEB4	2066.97	0.642252	5.68989e-28	3.1984e-26
ENSG00000092607	TBX15	57.5514	-2.53911	6.20543e-28	3.47874e-26
ENSG00000198554	WDHD1	1938.84	-0.697449	6.3895e-28	3.57225e-26
ENSG00000198496	NBR2	493.509	0.932134	6.48222e-28	3.61432e-26
ENSG00000125450	NUP85	2020	-0.539819	6.81842e-28	3.79156e-26
ENSG00000161547	SRSF2	6817.28	-0.459852	8.19322e-28	4.54383e-26
ENSG00000136436	CALCOCO2	2234.82	0.437322	9.02244e-28	4.99033e-26
ENSG00000164010	ERMAP	389.226	0.982332	1.08443e-27	5.982e-26
ENSG00000165661	QSOX2	1868.46	-0.538924	1.18915e-27	6.54221e-26
ENSG00000140941	MAP1LC3B	930.263	0.712111	1.42635e-27	7.82636e-26
ENSG00000092621	PHGDH	12076.4	0.811601	1.47006e-27	8.04491e-26
ENSG00000147526	TACC1	4836.99	-0.475031	1.47865e-27	8.07056e-26
ENSG00000115993	TRAK2	2181.18	0.607014	1.70047e-27	9.25684e-26
ENSG00000074416	MGLL	710.185	-0.751983	1.7893e-27	9.68941e-26
ENSG00000101311	FERMT1	689.389	-0.690117	1.7881e-27	9.68941e-26
ENSG00000164818	DNAAF5	2052.63	-0.592019	1.79552e-27	9.69767e-26
ENSG00000111641	NOP2	3270.14	-0.660074	2.0727e-27	1.11656e-25
ENSG00000011426	ANLN	3865.44	-0.62878	2.14501e-27	1.15251e-25
ENSG00000149970	CNKSR2	630.914	-0.986241	2.38802e-27	1.27976e-25
ENSG00000084774	CAD	4528.56	-0.621644	2.43022e-27	1.29901e-25
ENSG00000093000	NUP50	5100.53	-0.448867	2.43778e-27	1.29969e-25
ENSG00000239306	RBM14	2663.7	-0.490028	2.56255e-27	1.3627e-25
ENSG00000164307	ERAP1	399.627	0.89047	2.72052e-27	1.44299e-25
ENSG00000184661	CDCA2	2242.83	-0.545608	2.77052e-27	1.46575e-25
ENSG00000168003	SLC3A2	6034.09	0.674069	3.5534e-27	1.87514e-25
ENSG00000149554	CHEK1	1558.17	-0.704354	4.12735e-27	2.17248e-25
ENSG00000105281	SLC1A5	5298.66	0.736341	5.02069e-27	2.63599e-25
ENSG00000147224	PRPS1	4182.73	-0.455632	6.1726e-27	3.23257e-25
ENSG00000146733	PSPH	1676.29	0.713875	7.12474e-27	3.72178e-25
ENSG00000110841	PPFIBP1	2184.32	-0.615042	7.46866e-27	3.89161e-25
ENSG00000166986	MARS	6374.48	0.586253	1.27152e-26	6.60868e-25
ENSG00000128944	KNSTRN	1547.07	-0.62929	1.34682e-26	6.98252e-25
ENSG00000166292	TMEM100	40.4651	-5.15817	1.40689e-26	7.27571e-25
ENSG00000109323	MANBA	855.587	0.744839	1.80422e-26	9.30727e-25
ENSG00000196363	WDR5	2480.31	-0.520761	1.93716e-26	9.9682e-25
ENSG00000120594	PLXDC2	433.498	0.900488	2.30627e-26	1.18381e-24
ENSG00000159259	CHAF1B	1120.43	-0.692458	2.73603e-26	1.40093e-24
ENSG00000135476	ESPL1	1627.99	-0.565839	2.74808e-26	1.40362e-24
ENSG00000090447	TFAP4	1176.6	-0.764718	2.86318e-26	1.45881e-24
ENSG00000171940	ZNF217	6614.31	0.462402	3.0185e-26	1.53417e-24
ENSG00000151150	ANK3	13549.1	0.511556	3.20581e-26	1.62538e-24
ENSG00000148773	MKI67	11499.6	-0.707029	3.56357e-26	1.80235e-24
ENSG00000155561	NUP205	7296.62	-0.506386	3.57662e-26	1.80454e-24
ENSG00000169504	CLIC4	1970.65	0.933079	4.5204e-26	2.27516e-24
ENSG00000188554	NBR1	3963.16	0.421854	6.54277e-26	3.28504e-24
ENSG00000141140	NA	2740.78	-0.552202	7.22975e-26	3.62118e-24
ENSG00000163293	NIPAL1	288.409	1.06349	7.85974e-26	3.92721e-24
ENSG00000137124	ALDH1B1	4167.59	-0.454717	8.64324e-26	4.30829e-24
ENSG00000084090	STARD7	7725.5	-0.383731	1.39634e-25	6.94345e-24
ENSG00000198901	PRC1	3305.63	-0.42513	1.42418e-25	7.06488e-24
ENSG00000140199	SLC12A6	823.455	0.693507	1.54607e-25	7.65119e-24
ENSG00000149136	SSRP1	9610.43	-0.54329	1.60046e-25	7.90146e-24
ENSG00000163273	NPPC	42.702	-3.01234	1.76059e-25	8.67131e-24
ENSG00000181744	C3orf58	285.676	-1.33468	2.3221e-25	1.14097e-23
ENSG00000131368	MRPS25	2932.99	-0.475753	2.86056e-25	1.40222e-23
ENSG00000158270	COLEC12	829.901	0.790732	3.45592e-25	1.69005e-23
ENSG00000101003	GINS1	2973.6	-0.628508	3.87442e-25	1.89024e-23
ENSG00000140564	FURIN	1202.96	0.732002	3.96343e-25	1.92912e-23
ENSG00000132780	NASP	5145.76	-0.797123	4.12859e-25	2.00479e-23
ENSG00000179409	GEMIN4	2886.99	-0.622198	4.21938e-25	2.04408e-23
ENSG00000178105	DDX10	1878.96	-0.49426	4.24962e-25	2.05391e-23
ENSG00000135245	HILPDA	715.968	-0.688155	4.57873e-25	2.20782e-23
ENSG00000269834	ZNF528-AS1	400.954	0.839041	5.02413e-25	2.41696e-23
ENSG00000136235	GPNMB	136.973	1.53392	5.92624e-25	2.84432e-23
ENSG00000166046	TCP11L2	162.29	1.24088	6.59294e-25	3.15698e-23
ENSG00000248498	ASNSP1	95.8138	1.96941	7.8229e-25	3.73729e-23
ENSG00000125780	TGM3	93.6274	1.77199	8.07951e-25	3.85098e-23
ENSG00000167566	NCKAP5L	345.437	0.963047	8.61925e-25	4.0988e-23
ENSG00000101868	POLA1	1940.56	-0.544649	9.54867e-25	4.53036e-23
ENSG00000005189	REXO5	863.861	-0.594014	9.95918e-25	4.71431e-23
ENSG00000152117	AC073869.1	846.972	-0.790679	1.00565e-24	4.7495e-23
ENSG00000092421	SEMA6A	6701.55	0.580808	1.16654e-24	5.49683e-23
ENSG00000119669	IRF2BPL	5394.89	0.506924	1.18759e-24	5.58328e-23
ENSG00000149809	TM7SF2	4126.13	0.811922	1.19333e-24	5.59757e-23
ENSG00000140650	PMM2	1259.57	-0.518286	1.23754e-24	5.79178e-23
ENSG00000155158	TTC39B	442.878	0.982348	1.24853e-24	5.83004e-23
ENSG00000213047	DENND1B	2139	0.982041	1.27095e-24	5.92135e-23
ENSG00000138613	APH1B	699.65	0.878671	1.35992e-24	6.32162e-23
ENSG00000213853	EMP2	1393.01	-0.619081	1.36941e-24	6.35149e-23
ENSG00000011007	ELOA	2892.8	-0.409128	1.38789e-24	6.40845e-23
ENSG00000103365	GGA2	2398.43	-0.398493	1.38496e-24	6.40845e-23
ENSG00000189091	SF3B3	12855.7	-0.324583	1.43644e-24	6.61785e-23
ENSG00000182158	CREB3L2	2760.91	0.382844	1.45229e-24	6.67601e-23
ENSG00000065534	MYLK	445.356	1.16381	1.4853e-24	6.8126e-23
ENSG00000005100	DHX33	1863.66	-0.495142	1.55908e-24	7.13523e-23
ENSG00000148459	PDSS1	737.176	-0.68374	1.65799e-24	7.57111e-23
ENSG00000176046	NUPR1	3941.08	1.22104	1.69209e-24	7.70982e-23
ENSG00000146731	CCT6A	12022.7	-0.484407	1.70088e-24	7.73285e-23
ENSG00000124664	SPDEF	2532.1	-0.717168	1.7095e-24	7.75497e-23
ENSG00000011304	PTBP1	13667.6	-0.444409	1.76498e-24	7.98916e-23
ENSG00000007968	E2F2	765.362	-0.773958	1.80062e-24	8.13266e-23
ENSG00000169604	ANTXR1	481.176	0.837844	1.85394e-24	8.35526e-23
ENSG00000130816	DNMT1	7748.75	-0.738025	1.92504e-24	8.65682e-23
ENSG00000116237	ICMT	4889.56	-0.454297	1.98011e-24	8.88516e-23
ENSG00000030066	NUP160	3476.1	-0.493018	2.02124e-24	9.05008e-23
ENSG00000120800	UTP20	3968.1	-0.528983	2.1464e-24	9.58973e-23
ENSG00000136875	PRPF4	2155.75	-0.416027	2.34347e-24	1.04476e-22
ENSG00000072134	EPN2	2235.48	-0.460997	2.58562e-24	1.15024e-22
ENSG00000170525	PFKFB3	910.156	-0.726457	3.15176e-24	1.39908e-22
ENSG00000166197	NOLC1	8829.05	-0.586613	4.98559e-24	2.20839e-22
ENSG00000247626	MARS2	1484.23	-0.598413	5.16014e-24	2.28083e-22
ENSG00000131876	SNRPA1	1609.45	-0.528191	5.28291e-24	2.33011e-22
ENSG00000198700	IPO9	5219.98	-0.338763	5.77458e-24	2.54155e-22
ENSG00000101361	NOP56	7549.48	-0.664772	6.08102e-24	2.67074e-22
ENSG00000034677	RNF19A	876.479	0.894451	7.38358e-24	3.23595e-22
ENSG00000156970	BUB1B	2686.9	-0.569027	8.29241e-24	3.62657e-22
ENSG00000112759	SLC29A1	944.925	-0.804454	8.52523e-24	3.72052e-22
ENSG00000100749	VRK1	1099.99	-0.671023	1.05297e-23	4.58561e-22
ENSG00000159322	ADPGK	2359.79	-0.41939	1.16079e-23	5.04456e-22
ENSG00000107537	PHYH	984.416	0.731152	1.16413e-23	5.04848e-22
ENSG00000143079	CTTNBP2NL	1217.36	0.491199	1.28132e-23	5.54506e-22
ENSG00000058600	POLR3E	2005.5	-0.627216	1.3421e-23	5.79597e-22
ENSG00000148229	POLE3	3914.86	-0.580656	1.48279e-23	6.39021e-22
ENSG00000245750	DRAIC	318.459	0.840462	1.51662e-23	6.52241e-22
ENSG00000099875	MKNK2	8284.7	0.520179	1.55284e-23	6.66432e-22
ENSG00000035681	NSMAF	1309.53	-0.536784	1.74734e-23	7.48354e-22
ENSG00000075643	MOCOS	1750.05	0.473812	1.88181e-23	8.0428e-22
ENSG00000170515	PA2G4	6295.66	-0.637984	2.21647e-23	9.45359e-22
ENSG00000130309	COLGALT1	4577.84	-0.472051	2.88218e-23	1.22677e-21
ENSG00000132837	DMGDH	65.5572	1.89501	3.2012e-23	1.35975e-21
ENSG00000080298	RFX3	614.749	0.888632	3.21935e-23	1.36466e-21
ENSG00000101384	JAG1	2202.2	-0.458621	3.26823e-23	1.38255e-21
ENSG00000187193	MT1X	533.6	1.07577	3.36311e-23	1.41978e-21
ENSG00000196549	MME	30322.9	0.584043	4.06671e-23	1.71332e-21
ENSG00000189060	H1F0	12341.3	-0.363068	4.23897e-23	1.78226e-21
ENSG00000170017	ALCAM	3690.98	0.558505	5.47432e-23	2.29699e-21
ENSG00000110660	SLC35F2	1758.48	-0.4443	5.71163e-23	2.39172e-21
ENSG00000135912	TTLL4	1033.17	-0.661718	5.84534e-23	2.44276e-21
ENSG00000156471	PTDSS1	3828.06	-0.466528	5.90491e-23	2.46268e-21
ENSG00000115183	TANC1	7056.27	0.345899	6.76576e-23	2.81603e-21
ENSG00000141385	AFG3L2	4760.23	-0.364713	7.12087e-23	2.95788e-21
ENSG00000092201	SUPT16H	7181	-0.457834	7.83582e-23	3.24833e-21
ENSG00000133119	RFC3	1379.99	-0.658465	7.91458e-23	3.27442e-21
ENSG00000261824	LINC00662	689.601	0.753338	8.46686e-23	3.49592e-21
ENSG00000176533	GNG7	342.223	0.871561	8.61628e-23	3.55052e-21
ENSG00000064042	LIMCH1	19881.1	-0.416054	9.22976e-23	3.79576e-21
ENSG00000164251	F2RL1	1075.85	-0.622036	9.48743e-23	3.89399e-21
ENSG00000051825	MPHOSPH9	3289.46	-0.787244	9.95007e-23	4.07578e-21
ENSG00000052795	FNIP2	1299.04	-0.481292	1.07286e-22	4.386e-21
ENSG00000100100	PIK3IP1	408.251	0.957476	1.20381e-22	4.91162e-21
ENSG00000105136	ZNF419	769.457	0.655408	1.21651e-22	4.95369e-21
ENSG00000164091	WDR82	6509.97	-0.299756	1.34251e-22	5.45602e-21
ENSG00000080493	SLC4A4	1267.27	-0.758264	1.69247e-22	6.8648e-21
ENSG00000184545	DUSP8	968.459	0.690284	1.70961e-22	6.92075e-21
ENSG00000175471	MCTP1	87.1632	1.70225	1.9001e-22	7.67685e-21
ENSG00000106348	IMPDH1	2411.77	-0.638559	2.17451e-22	8.76842e-21
ENSG00000180198	RCC1	3974.98	-0.761418	2.22159e-22	8.94081e-21
ENSG00000197965	MPZL1	5123.83	-0.347783	2.37672e-22	9.54657e-21
ENSG00000136261	BZW2	2825.27	-0.543632	2.47926e-22	9.93913e-21
ENSG00000171517	LPAR3	2203.83	-0.542786	2.70818e-22	1.08359e-20
ENSG00000103550	KNOP1	2492.49	-0.435914	2.98643e-22	1.19261e-20
ENSG00000110931	CAMKK2	2484.5	-0.44494	3.22313e-22	1.28465e-20
ENSG00000090889	KIF4A	2026.14	-0.462442	3.61448e-22	1.43787e-20
ENSG00000161638	ITGA5	898.852	0.837735	3.75804e-22	1.49211e-20
ENSG00000100906	NFKBIA	2469.18	-0.536476	4.00202e-22	1.58594e-20
ENSG00000253203	GUSBP3	402.473	0.843561	4.09334e-22	1.61902e-20
ENSG00000149212	SESN3	4549.3	1.15516	5.03414e-22	1.98733e-20
ENSG00000108175	ZMIZ1	9167.01	-0.668741	5.18744e-22	2.04395e-20
ENSG00000157212	PAXIP1	1422.15	-0.529763	5.2111e-22	2.04937e-20
ENSG00000255717	SNHG1	4427.79	-0.581813	5.44385e-22	2.13684e-20
ENSG00000079616	KIF22	3893.7	-0.688247	5.66079e-22	2.21778e-20
ENSG00000123908	AGO2	3154.11	-0.468375	5.75215e-22	2.24932e-20
ENSG00000013810	TACC3	4098.15	-0.763241	6.39205e-22	2.49483e-20
ENSG00000163050	COQ8A	2771.44	-0.609875	6.5406e-22	2.548e-20
ENSG00000204256	BRD2	4486.6	-0.302095	6.71297e-22	2.61023e-20
ENSG00000154920	EME1	664.013	-0.634095	6.77712e-22	2.63024e-20
ENSG00000067798	NAV3	1463.45	-0.680416	6.81417e-22	2.63966e-20
ENSG00000158186	MRAS	427.5	0.728952	6.91768e-22	2.67475e-20
ENSG00000183044	ABAT	1610.17	0.445056	7.31473e-22	2.823e-20
ENSG00000006652	IFRD1	968.23	0.772256	7.57308e-22	2.91726e-20
ENSG00000123737	EXOSC9	1223.23	-0.594496	8.34991e-22	3.21053e-20
ENSG00000125630	POLR1B	2467.54	-0.524551	9.42641e-22	3.61771e-20
ENSG00000134698	AGO4	1236.22	0.530759	9.67291e-22	3.70544e-20
ENSG00000131470	PSMC3IP	727.681	-0.638698	9.86243e-22	3.77106e-20
ENSG00000103067	ESRP2	3219.73	-0.541179	1.03113e-21	3.92817e-20
ENSG00000108883	EFTUD2	4926.6	-0.449029	1.03097e-21	3.92817e-20
ENSG00000120334	CENPL	687.444	-0.591944	1.09347e-21	4.158e-20
ENSG00000136205	TNS3	80.4538	-1.94186	1.10489e-21	4.1937e-20
ENSG00000125871	MGME1	1546.86	-0.482741	1.17015e-21	4.43327e-20
ENSG00000116761	CTH	313.293	0.896035	1.17545e-21	4.44523e-20
ENSG00000144468	RHBDD1	1090.83	0.539149	1.20016e-21	4.53039e-20
ENSG00000205189	ZBTB10	2691.54	-1.31645	1.2296e-21	4.63306e-20
ENSG00000167325	RRM1	7075.74	-0.473597	1.27822e-21	4.80752e-20
ENSG00000163884	KLF15	602.505	-0.721921	1.40243e-21	5.2651e-20
ENSG00000165029	ABCA1	106.722	1.72165	1.45117e-21	5.4382e-20
ENSG00000111602	TIMELESS	3487.06	-0.505799	1.45745e-21	5.45185e-20
ENSG00000136828	RALGPS1	566.295	0.684709	1.5184e-21	5.66961e-20
ENSG00000155304	HSPA13	883.998	0.772725	1.53578e-21	5.72417e-20
ENSG00000109519	GRPEL1	2803.38	-0.528785	1.59516e-21	5.93479e-20
ENSG00000244462	RBM12	4450.61	-0.42254	2.14552e-21	7.96808e-20
ENSG00000211584	SLC48A1	925.112	0.621839	2.1632e-21	8.01935e-20
ENSG00000131467	PSME3	7178.14	-0.333354	2.26346e-21	8.37602e-20
ENSG00000170122	FOXD4	252.114	-1.00681	2.4693e-21	9.12141e-20
ENSG00000041880	PARP3	392.225	0.924338	2.69426e-21	9.93466e-20
ENSG00000165821	SALL2	783.127	0.641809	2.71204e-21	9.98244e-20
ENSG00000143753	DEGS1	7556.13	-0.711171	2.91958e-21	1.07273e-19
ENSG00000117399	CDC20	4112.31	-0.645766	3.00267e-21	1.1013e-19
ENSG00000075336	TIMM21	1516.81	-0.55721	3.2811e-21	1.20129e-19
ENSG00000157193	LRP8	1270.26	-0.564368	3.58165e-21	1.30901e-19
ENSG00000062485	CS	12056	-0.324938	3.63219e-21	1.32514e-19
ENSG00000057757	PITHD1	1048.35	-0.539794	4.11676e-21	1.49928e-19
ENSG00000115616	SLC9A2	2053.72	-0.550525	4.5345e-21	1.64852e-19
ENSG00000095739	BAMBI	608.753	0.760942	5.06788e-21	1.8392e-19
ENSG00000154654	NCAM2	16418.4	0.454613	5.11972e-21	1.85476e-19
ENSG00000120802	TMPO	6999.1	-0.481394	5.13461e-21	1.8569e-19
ENSG00000133226	SRRM1	4804.54	-0.406954	5.21689e-21	1.88336e-19
ENSG00000132846	ZBED3	1472.8	0.562422	5.24807e-21	1.89132e-19
ENSG00000163918	RFC4	1722.67	-0.510318	5.2659e-21	1.89444e-19
ENSG00000003147	ICA1	1324.56	0.448873	5.52727e-21	1.98502e-19
ENSG00000163597	SNHG16	8972.49	-0.39058	5.70327e-21	2.04468e-19
ENSG00000088247	KHSRP	10528.4	-0.422873	6.21183e-21	2.22315e-19
ENSG00000146433	TMEM181	1112.47	0.541188	6.24863e-21	2.23246e-19
ENSG00000137393	RNF144B	405.298	1.04995	6.46301e-21	2.30507e-19
ENSG00000075702	WDR62	1096.7	-0.574217	6.80254e-21	2.42199e-19
ENSG00000121057	AKAP1	4036.21	-0.864846	8.65667e-21	3.07684e-19
ENSG00000145041	DCAF1	1058.55	-0.488526	9.03046e-21	3.20419e-19
ENSG00000178761	FAM219B	1613.8	0.552942	9.77244e-21	3.46152e-19
ENSG00000108559	NUP88	3300.8	-0.441297	1.06941e-20	3.78152e-19
ENSG00000123485	HJURP	2283.53	-0.486737	1.08748e-20	3.83884e-19
ENSG00000186871	ERCC6L	894.315	-0.731176	1.12738e-20	3.97292e-19
ENSG00000196230	TUBB	9073.88	-0.533172	1.13963e-20	4.00925e-19
ENSG00000163811	WDR43	3412.98	-0.54004	1.15134e-20	4.04356e-19
ENSG00000145476	CYP4V2	614.403	0.686651	1.19718e-20	4.19744e-19
ENSG00000143153	ATP1B1	5391.87	0.610294	1.21948e-20	4.2684e-19
ENSG00000082014	SMARCD3	637.271	0.806799	1.22666e-20	4.28626e-19
ENSG00000165891	E2F7	762.625	-0.786676	1.30791e-20	4.56246e-19
ENSG00000112312	GMNN	1095.92	-0.59951	1.3811e-20	4.80967e-19
ENSG00000100304	TTLL12	6890.44	-0.556007	1.39119e-20	4.83666e-19
ENSG00000196374	NA	2986.26	-0.865593	1.40281e-20	4.86887e-19
ENSG00000134440	NARS	7597.46	0.409071	1.44562e-20	5.00906e-19
ENSG00000112029	FBXO5	861.661	-0.789493	1.67581e-20	5.79696e-19
ENSG00000117877	CD3EAP	998.352	-1.13155	1.71847e-20	5.9346e-19
ENSG00000112941	TENT4A	1578.67	-0.444559	1.77236e-20	6.10909e-19
ENSG00000131351	HAUS8	530.693	-0.836954	1.77786e-20	6.10909e-19
ENSG00000151693	ASAP2	1614.21	0.573222	1.77659e-20	6.10909e-19
ENSG00000108669	CYTH1	1313.44	-0.488944	1.85293e-20	6.3565e-19
ENSG00000128829	EIF2AK4	5122.57	-0.340148	1.88752e-20	6.46443e-19
ENSG00000068971	PPP2R5B	466.503	0.846624	1.97267e-20	6.74489e-19
ENSG00000089685	BIRC5	4318.14	-0.482698	2.34535e-20	8.00594e-19
ENSG00000166851	PLK1	3644.25	-0.524726	2.45631e-20	8.37089e-19
ENSG00000084636	COL16A1	53.0921	2.52745	2.59699e-20	8.83574e-19
ENSG00000145088	EAF2	178.921	-1.47216	2.68089e-20	9.10621e-19
ENSG00000095321	CRAT	1045.46	0.801277	2.69113e-20	9.12601e-19
ENSG00000112365	ZBTB24	914.476	-0.517436	2.82601e-20	9.56775e-19
ENSG00000110713	NUP98	7535.38	-0.362971	3.13527e-20	1.05974e-18
ENSG00000131462	TUBG1	5293.28	-0.60984	3.29487e-20	1.11187e-18
ENSG00000157388	CACNA1D	274.641	1.04533	3.4085e-20	1.14648e-18
ENSG00000174951	FUT1	403.488	0.939586	3.40303e-20	1.14648e-18
ENSG00000130204	TOMM40	3455.66	-0.624042	3.65715e-20	1.22811e-18
ENSG00000149177	PTPRJ	1121.13	-0.61765	3.67844e-20	1.23326e-18
ENSG00000158169	FANCC	1041.51	-0.519719	3.77839e-20	1.26472e-18
ENSG00000105447	GRWD1	1562.23	-0.597171	3.93531e-20	1.31314e-18
ENSG00000163814	CDCP1	4201.17	-0.408719	3.93573e-20	1.31314e-18
ENSG00000141027	NCOR1	11784.6	-0.33755	3.95026e-20	1.31586e-18
ENSG00000161011	SQSTM1	6143.69	0.63622	4.08068e-20	1.35712e-18
ENSG00000116977	LGALS8	1465.49	0.719835	4.94177e-20	1.64086e-18
ENSG00000141664	ZCCHC2	1929.51	-0.469618	4.99056e-20	1.6544e-18
ENSG00000172216	CEBPB	833.581	0.941791	5.32571e-20	1.76268e-18
ENSG00000129682	FGF13	104.022	1.56619	6.40219e-20	2.11559e-18
ENSG00000213551	DNAJC9	1528.1	-0.499127	6.41785e-20	2.11738e-18
ENSG00000170011	MYRIP	1202.18	0.506951	6.46436e-20	2.12933e-18
ENSG00000119242	CCDC92	463.077	0.758783	6.5417e-20	2.15138e-18
ENSG00000106261	ZKSCAN1	7082.92	0.411929	6.55306e-20	2.15169e-18
ENSG00000185442	FAM174B	1505.86	-0.528346	6.86292e-20	2.24986e-18
ENSG00000053372	MRTO4	1638.1	-0.611134	7.31623e-20	2.39468e-18
ENSG00000120314	WDR55	2105.62	-0.401565	7.74427e-20	2.53077e-18
ENSG00000135452	TSPAN31	503.71	0.721942	8.70929e-20	2.84165e-18
ENSG00000115687	PASK	2857.44	-0.564194	8.72987e-20	2.84387e-18
ENSG00000159131	GART	3841.02	-0.429486	8.78903e-20	2.85865e-18
ENSG00000104885	DOT1L	3714.13	-0.691054	8.85171e-20	2.87451e-18
ENSG00000186654	PRR5	521.277	-0.732989	9.60665e-20	3.11478e-18
ENSG00000146674	IGFBP3	612.651	0.736988	9.70948e-20	3.1432e-18
ENSG00000177058	SLC38A9	628.459	0.630276	1.1309e-19	3.65528e-18
ENSG00000167461	RAB8A	3325.76	-0.451761	1.26872e-19	4.09434e-18
ENSG00000167996	FTH1	58960.4	0.684512	1.31139e-19	4.22544e-18
ENSG00000170779	CDCA4	1348.52	-0.69574	1.41139e-19	4.54061e-18
ENSG00000249641	HOXC13-AS	231.699	1.21809	1.41895e-19	4.55782e-18
ENSG00000144560	VGLL4	2536.77	0.359164	1.42979e-19	4.58551e-18
ENSG00000204128	C2orf72	202.984	-1.33014	1.47083e-19	4.70984e-18
ENSG00000184675	AMER1	1221.65	-0.526618	1.5528e-19	4.96464e-18
ENSG00000187210	GCNT1	1858.72	-0.675346	1.60042e-19	5.109e-18
ENSG00000172296	SPTLC3	592.442	0.817596	1.64618e-19	5.24699e-18
ENSG00000007923	DNAJC11	3358.38	-0.561054	1.65316e-19	5.2611e-18
ENSG00000145632	PLK2	1555.16	-0.526475	1.66986e-19	5.3061e-18
ENSG00000129195	PIMREG	1311.53	-0.568498	1.73744e-19	5.51236e-18
ENSG00000241945	PWP2	1136.38	-0.725259	1.74477e-19	5.52716e-18
ENSG00000183647	ZNF530	474.371	-0.684317	2.0873e-19	6.60214e-18
ENSG00000138029	HADHB	2685.82	0.387984	2.12433e-19	6.709e-18
ENSG00000116830	TTF2	2525.05	-0.483915	2.14227e-19	6.75532e-18
ENSG00000166391	MOGAT2	37.3085	-3.01173	2.36294e-19	7.43985e-18
ENSG00000101412	E2F1	2219.67	-0.60221	2.54294e-19	7.99441e-18
ENSG00000113369	ARRDC3	2943.91	0.774962	2.80175e-19	8.79468e-18
ENSG00000126603	GLIS2	441.625	0.948997	2.82953e-19	8.86843e-18
ENSG00000205531	NAP1L4	5080.52	-0.285074	2.89215e-19	9.051e-18
ENSG00000170385	SLC30A1	1088.74	0.821392	2.94367e-19	9.19831e-18
ENSG00000186814	ZSCAN30	568.087	0.761001	2.95091e-19	9.20703e-18
ENSG00000052344	PRSS8	1420.82	0.758761	3.00855e-19	9.37272e-18
ENSG00000110400	NECTIN1	2341.73	-0.62841	3.35841e-19	1.04469e-17
ENSG00000166123	GPT2	4021.29	0.56756	3.6866e-19	1.14506e-17
ENSG00000182199	SHMT2	8458.39	0.522971	4.11914e-19	1.27749e-17
ENSG00000095209	TMEM38B	1116.55	0.66367	4.43068e-19	1.37205e-17
ENSG00000124635	HIST1H2BJ	5443.1	-0.753839	4.75432e-19	1.47007e-17
ENSG00000144231	POLR2D	1393.96	-0.476663	4.90342e-19	1.51391e-17
ENSG00000100292	HMOX1	279.049	1.20933	4.97368e-19	1.53179e-17
ENSG00000141232	TOB1	4263.68	0.358775	4.97612e-19	1.53179e-17
ENSG00000152894	PTPRK	636.916	0.644442	5.57103e-19	1.71237e-17
ENSG00000048162	NOP16	1975.01	-0.759849	5.61366e-19	1.72291e-17
ENSG00000179889	PDXDC1	5814.72	-0.308912	5.86612e-19	1.79773e-17
ENSG00000127954	STEAP4	29.8884	-3.40531	6.25722e-19	1.91475e-17
ENSG00000161048	NAPEPLD	582.43	0.714445	6.73693e-19	2.0585e-17
ENSG00000081803	CADPS2	653.1	-0.626421	6.94534e-19	2.11905e-17
ENSG00000104341	LAPTM4B	1597.92	0.486342	7.06801e-19	2.1533e-17
ENSG00000133134	BEX2	599.139	0.807732	7.14557e-19	2.17372e-17
ENSG00000164466	SFXN1	4237.29	-0.466327	7.72223e-19	2.3457e-17
ENSG00000096088	PGC	39.9455	-2.70265	8.34845e-19	2.5322e-17
ENSG00000120694	HSPH1	6085.33	-0.607299	8.40803e-19	2.54654e-17
ENSG00000104369	JPH1	683.319	-0.845215	8.56188e-19	2.58934e-17
ENSG00000198380	GFPT1	3399.95	0.433393	9.21037e-19	2.7814e-17
ENSG00000132466	ANKRD17	9057.54	-0.391854	1.08612e-18	3.27514e-17
ENSG00000138413	IDH1	7728.83	0.438046	1.11726e-18	3.36415e-17
ENSG00000119138	KLF9	1976.57	0.439382	1.16246e-18	3.49516e-17
ENSG00000134697	GNL2	4446.38	-0.455133	1.17528e-18	3.52857e-17
ENSG00000049541	RFC2	1211.05	-0.633535	1.3069e-18	3.91805e-17
ENSG00000127824	TUBA4A	5313.6	-0.582706	1.41854e-18	4.24659e-17
ENSG00000035499	DEPDC1B	1445.45	-0.535373	1.47463e-18	4.40811e-17
ENSG00000005884	ITGA3	382.614	0.813892	1.56211e-18	4.6629e-17
ENSG00000182841	RRP7BP	602.18	-0.848744	1.61145e-18	4.80323e-17
ENSG00000158710	TAGLN2	4660.21	-0.592968	1.64428e-18	4.89405e-17
ENSG00000161888	SPC24	3299.48	-0.527298	1.65697e-18	4.92471e-17
ENSG00000130517	PGPEP1	1125.1	0.677138	1.76426e-18	5.23609e-17
ENSG00000172379	ARNT2	551.922	0.669746	1.77764e-18	5.26822e-17
ENSG00000139946	PELI2	293.328	0.930215	1.87678e-18	5.55408e-17
ENSG00000080608	PUM3	1069.33	-0.560147	1.93719e-18	5.72467e-17
ENSG00000065923	SLC9A7	1499.04	0.434794	1.94811e-18	5.74873e-17
ENSG00000112146	FBXO9	1544.78	0.433681	2.10222e-18	6.18584e-17
ENSG00000119950	MXI1	1092.79	0.60235	2.09982e-18	6.18584e-17
ENSG00000174669	SLC29A2	907.556	-0.572286	2.2044e-18	6.47731e-17
ENSG00000165689	ENTR1	2708.98	-0.469061	2.35848e-18	6.92022e-17
ENSG00000004487	KDM1A	3432.33	-0.340891	2.41782e-18	7.08427e-17
ENSG00000114248	LRRC31	36.2909	2.55487	2.63427e-18	7.70757e-17
ENSG00000167695	FAM57A	1145.85	-0.494134	2.78403e-18	8.13425e-17
ENSG00000186212	SOWAHB	614.843	0.70523	3.52231e-18	1.02768e-16
ENSG00000136167	LCP1	2614.48	-0.495407	3.54043e-18	1.03006e-16
ENSG00000151576	QTRT2	1655.45	-0.421887	3.53756e-18	1.03006e-16
ENSG00000237649	KIFC1	970.068	-0.568413	3.67114e-18	1.06659e-16
ENSG00000175215	CTDSP2	4360.84	0.409734	3.8492e-18	1.11675e-16
ENSG00000156689	GLYATL2	212.988	-0.983014	3.92725e-18	1.1378e-16
ENSG00000169299	PGM2	2471.34	-0.405621	3.96844e-18	1.14813e-16
ENSG00000103479	RBL2	3699.28	0.445682	4.06839e-18	1.1754e-16
ENSG00000139211	AMIGO2	74.5972	1.97735	4.14392e-18	1.19555e-16
ENSG00000125912	NCLN	3346.09	-0.524058	4.25831e-18	1.22684e-16
ENSG00000136628	EPRS	12973.7	0.495078	4.41289e-18	1.26961e-16
ENSG00000109572	CLCN3	4718.71	0.509011	4.66439e-18	1.3401e-16
ENSG00000162408	NOL9	3422.25	-0.449208	4.73585e-18	1.35875e-16
ENSG00000115875	SRSF7	3951.03	-0.378834	5.30197e-18	1.51907e-16
ENSG00000158050	DUSP2	612.049	-1.04663	5.35412e-18	1.53189e-16
ENSG00000138798	EGF	188.412	0.938259	6.08814e-18	1.73949e-16
ENSG00000060688	SNRNP40	2935.6	-0.48567	6.31791e-18	1.80265e-16
ENSG00000146278	PNRC1	504.942	0.843192	6.81255e-18	1.94111e-16
ENSG00000035664	DAPK2	192.369	1.07528	7.53616e-18	2.14433e-16
ENSG00000247077	PGAM5	3335.29	-0.566496	7.69434e-18	2.18633e-16
ENSG00000132763	MMACHC	1294.11	-0.592121	7.87762e-18	2.23534e-16
ENSG00000136450	SRSF1	9167.74	-0.29125	8.02474e-18	2.27397e-16
ENSG00000065183	WDR3	4345.57	-0.418664	8.65782e-18	2.45001e-16
ENSG00000143337	TOR1AIP1	1798.75	0.443346	1.03897e-17	2.93608e-16
ENSG00000059573	ALDH18A1	5610.28	-0.380286	1.06178e-17	2.99644e-16
ENSG00000125454	SLC25A19	909.068	-0.825102	1.1681e-17	3.292e-16
ENSG00000164294	GPX8	325.943	0.999543	1.19755e-17	3.3704e-16
ENSG00000138074	SLC5A6	1645.35	-0.478249	1.2246e-17	3.44186e-16
ENSG00000143457	GOLPH3L	1337.97	0.658528	1.23699e-17	3.47195e-16
ENSG00000133318	RTN3	8068.46	0.363453	1.29773e-17	3.63751e-16
ENSG00000092470	WDR76	684.406	-0.673236	1.37516e-17	3.84933e-16
ENSG00000138780	GSTCD	1108.42	-0.522103	1.4977e-17	4.18668e-16
ENSG00000228716	DHFR	4665.55	-0.422905	1.52933e-17	4.26934e-16
ENSG00000176390	CRLF3	423.177	-0.706217	1.91573e-17	5.34081e-16
ENSG00000006459	KDM7A	618.176	0.766832	1.95474e-17	5.44223e-16
ENSG00000147852	VLDLR	474.306	0.719717	2.01629e-17	5.60604e-16
ENSG00000172785	CBWD1	1400.88	-0.551177	2.10675e-17	5.84968e-16
ENSG00000132359	RAP1GAP2	2981.95	-0.420891	2.30205e-17	6.38341e-16
ENSG00000152795	HNRNPDL	5183.5	-0.380952	2.31833e-17	6.41994e-16
ENSG00000166016	ABTB2	459.789	0.752638	2.39804e-17	6.63181e-16
ENSG00000197653	DNAH10	45.7338	1.92464	2.45555e-17	6.78178e-16
ENSG00000137807	KIF23	1307.77	-0.505511	2.4656e-17	6.80045e-16
ENSG00000267041	ZNF850	1190.82	-0.77711	2.53954e-17	6.99506e-16
ENSG00000213585	VDAC1	12087.8	-0.320036	2.68678e-17	7.39079e-16
ENSG00000164056	SPRY1	542.957	-0.71076	3.00149e-17	8.24552e-16
ENSG00000172943	PHF8	1595.06	-0.566826	3.02619e-17	8.30236e-16
ENSG00000134684	YARS	5719.95	0.425917	3.16253e-17	8.6649e-16
ENSG00000123416	TUBA1B	38895.7	-0.500063	3.22256e-17	8.81771e-16
ENSG00000171574	ZNF584	761.397	-0.516362	3.25898e-17	8.90558e-16
ENSG00000129667	RHBDF2	667.516	-0.706669	3.3259e-17	9.07645e-16
ENSG00000132768	DPH2	1443.93	-0.634971	3.35204e-17	9.13573e-16
ENSG00000155792	DEPTOR	294.123	0.795053	3.40694e-17	9.27317e-16
ENSG00000085511	MAP3K4	1686.66	-0.416887	3.943e-17	1.07181e-15
ENSG00000109606	DHX15	8998	-0.44845	4.11915e-17	1.11822e-15
ENSG00000134057	CCNB1	5582.95	-0.459491	4.20668e-17	1.14049e-15
ENSG00000068489	PRR11	1977.3	-0.449973	4.66598e-17	1.26336e-15
ENSG00000169884	WNT10B	403.612	-0.860412	4.68111e-17	1.2658e-15
ENSG00000123364	HOXC13	579.912	0.729913	5.0103e-17	1.35304e-15
ENSG00000116560	SFPQ	13115.1	-0.297509	5.06837e-17	1.36338e-15
ENSG00000150768	DLAT	2687.67	-0.481102	5.05776e-17	1.36338e-15
ENSG00000188064	WNT7B	1332.25	-0.49776	5.06732e-17	1.36338e-15
ENSG00000165424	ZCCHC24	949.972	0.489045	5.11105e-17	1.37308e-15
ENSG00000184162	NR2C2AP	994.654	-0.644607	5.23981e-17	1.40585e-15
ENSG00000206053	JPT2	9980.91	-0.367127	5.26158e-17	1.40986e-15
ENSG00000090402	SI	2075.94	0.765054	5.35907e-17	1.43412e-15
ENSG00000197119	SLC25A29	1486.76	0.611623	5.71277e-17	1.5268e-15
ENSG00000133466	C1QTNF6	237.849	1.01764	5.88113e-17	1.56977e-15
ENSG00000141179	PCTP	436.879	-0.692098	5.9976e-17	1.59879e-15
ENSG00000010810	FYN	103.015	1.5963	6.06641e-17	1.61505e-15
ENSG00000171617	ENC1	1149.46	0.557066	6.2147e-17	1.65241e-15
ENSG00000149328	GLB1L2	1901.65	-0.461667	6.70393e-17	1.7802e-15
ENSG00000196449	YRDC	1127.78	-0.46367	6.73468e-17	1.78607e-15
ENSG00000137642	SORL1	2093.64	0.554505	7.10285e-17	1.8813e-15
ENSG00000136997	MYC	7913.14	-0.416575	7.56162e-17	2.00025e-15
ENSG00000102870	ZNF629	417.748	0.801569	7.82473e-17	2.06721e-15
ENSG00000126216	TUBGCP3	1803.81	-0.377407	8.68834e-17	2.29244e-15
ENSG00000012048	BRCA1	2819.42	-0.482586	8.73415e-17	2.30159e-15
ENSG00000154153	RETREG1	865.547	0.732238	9.68336e-17	2.54847e-15
ENSG00000102699	PARP4	2337.89	0.392696	1.02486e-16	2.6938e-15
ENSG00000138439	FAM117B	920.482	0.525997	1.19761e-16	3.14389e-15
ENSG00000186638	KIF24	791.773	-0.60873	1.19991e-16	3.14592e-15
ENSG00000111981	ULBP1	209.024	1.1657	1.26162e-16	3.30352e-15
ENSG00000186480	INSIG1	2203.08	0.533427	1.2703e-16	3.32205e-15
ENSG00000111206	FOXM1	5533.33	-0.41232	1.4233e-16	3.71747e-15
ENSG00000149636	DSN1	889.988	-0.507503	1.43562e-16	3.74494e-15
ENSG00000166402	TUB	1362.78	-0.52383	1.50339e-16	3.91678e-15
ENSG00000026559	KCNG1	189.753	1.03761	1.73765e-16	4.52138e-15
ENSG00000141736	ERBB2	5362.42	0.542613	1.79678e-16	4.66936e-15
ENSG00000115568	ZNF142	2152.09	-0.449116	1.8167e-16	4.71522e-15
ENSG00000113716	HMGXB3	3860.3	-0.456889	1.84937e-16	4.794e-15
ENSG00000129484	PARP2	1620.24	-0.469198	1.87847e-16	4.85725e-15
ENSG00000198435	NRARP	1265.12	-0.535109	1.87811e-16	4.85725e-15
ENSG00000079246	XRCC5	15020.9	-0.381465	1.90817e-16	4.92789e-15
ENSG00000105173	CCNE1	549.708	-0.607215	1.92054e-16	4.95364e-15
ENSG00000266729	DSG1-AS1	106.71	-1.25335	1.93471e-16	4.984e-15
ENSG00000259673	IQCH-AS1	302.001	0.815518	2.05201e-16	5.2796e-15
ENSG00000088280	ASAP3	420.245	0.820238	2.10692e-16	5.41413e-15
ENSG00000102554	KLF5	168.951	-1.07391	2.44996e-16	6.28784e-15
ENSG00000197406	DIO3	30.4213	3.08991	2.49292e-16	6.39016e-15
ENSG00000270605	AL353622.1	235.217	0.99067	2.55695e-16	6.54617e-15
ENSG00000080824	HSP90AA1	61549.8	-0.493499	2.62034e-16	6.70016e-15
ENSG00000136770	DNAJC1	1375.06	-0.372953	2.63307e-16	6.72442e-15
ENSG00000105223	PLD3	2999.42	0.55422	2.64444e-16	6.74511e-15
ENSG00000181467	RAP2B	1803.01	0.442629	2.70557e-16	6.89254e-15
ENSG00000164574	GALNT10	2049.96	0.496684	2.73355e-16	6.95527e-15
ENSG00000129911	KLF16	1206.62	-0.629146	2.79593e-16	7.10522e-15
ENSG00000168140	VASN	1100.72	0.702455	2.87999e-16	7.30987e-15
ENSG00000213024	NUP62	2980.32	-0.460312	3.04472e-16	7.7185e-15
ENSG00000109458	GAB1	281.836	0.81323	3.06559e-16	7.76192e-15
ENSG00000144746	ARL6IP5	3397.41	0.481647	3.44085e-16	8.70139e-15
ENSG00000075651	PLD1	38.0359	2.11338	3.48591e-16	8.80459e-15
ENSG00000141384	TAF4B	465.99	-0.633331	3.49434e-16	8.81511e-15
ENSG00000176903	PNMA1	584.645	-0.626071	3.52338e-16	8.87755e-15
ENSG00000166971	AKTIP	1467.53	0.502212	3.65701e-16	9.20304e-15
ENSG00000154124	OTULIN	1693.75	-0.574988	3.76377e-16	9.46019e-15
ENSG00000106344	RBM28	2401.98	-0.464221	4.10144e-16	1.02964e-14
ENSG00000105856	HBP1	768.476	0.760296	4.19141e-16	1.05095e-14
ENSG00000167106	FAM102A	2012.45	0.518354	4.44504e-16	1.1132e-14
ENSG00000103194	USP10	4012.77	-0.305343	4.53797e-16	1.1351e-14
ENSG00000172915	NBEA	392.431	0.92292	4.56604e-16	1.14074e-14
ENSG00000073060	SCARB1	3922.45	-0.416359	4.65047e-16	1.16043e-14
ENSG00000169359	SLC33A1	2491.18	0.433335	4.91544e-16	1.22507e-14
ENSG00000136840	ST6GALNAC4	466.46	0.815705	4.94113e-16	1.22999e-14
ENSG00000164086	DUSP7	1114.71	-0.559179	5.01816e-16	1.24766e-14
ENSG00000120942	UBIAD1	1734.82	-0.461035	5.62498e-16	1.39686e-14
ENSG00000051620	HEBP2	3171.86	-0.521144	5.98618e-16	1.48477e-14
ENSG00000055044	NOP58	3866.09	-0.458882	6.18169e-16	1.53143e-14
ENSG00000055163	CYFIP2	1987.15	0.42198	6.53338e-16	1.61662e-14
ENSG00000197905	TEAD4	689.893	-0.669546	6.57746e-16	1.62558e-14
ENSG00000132383	RPA1	5683.89	-0.285486	6.71602e-16	1.65785e-14
ENSG00000244468	AC093001.1	126.633	-1.40197	7.06826e-16	1.74272e-14
ENSG00000122034	GTF3A	4054.21	-0.460364	7.28942e-16	1.79511e-14
ENSG00000198176	TFDP1	2771.82	-0.364877	8.28946e-16	2.03895e-14
ENSG00000166734	CASC4	3564.84	0.422996	8.3738e-16	2.05725e-14
ENSG00000144749	LRIG1	2094.33	-0.366664	8.59311e-16	2.10863e-14
ENSG00000160124	CCDC58	978.545	-0.527985	8.77392e-16	2.15044e-14
ENSG00000060138	YBX3	6117.84	-0.3643	8.83757e-16	2.16348e-14
ENSG00000141560	FN3KRP	879.958	-0.574609	9.08476e-16	2.22136e-14
ENSG00000163472	TMEM79	838.903	-0.631211	9.50095e-16	2.32039e-14
ENSG00000147050	KDM6A	10827.9	0.399943	9.56163e-16	2.33245e-14
ENSG00000171444	MCC	227.223	0.899744	9.60425e-16	2.34009e-14
ENSG00000104361	NIPAL2	427.361	0.816824	1.00196e-15	2.43842e-14
ENSG00000136718	IMP4	2814.73	-0.528403	1.05135e-15	2.5556e-14
ENSG00000136273	HUS1	1276.04	-0.393371	1.09045e-15	2.64754e-14
ENSG00000182957	SPATA13	1181.66	-0.588957	1.0932e-15	2.6511e-14
ENSG00000116209	TMEM59	3467.31	0.51853	1.14372e-15	2.77038e-14
ENSG00000168300	PCMTD1	770.905	0.806356	1.17665e-15	2.84681e-14
ENSG00000160949	TONSL	1139.47	-1.13288	1.21012e-15	2.92436e-14
ENSG00000183762	KREMEN1	1131.06	0.453982	1.22839e-15	2.96504e-14
ENSG00000204519	ZNF551	1143.26	-0.468937	1.24841e-15	3.00986e-14
ENSG00000073331	ALPK1	176.831	0.916115	1.27679e-15	3.07469e-14
ENSG00000231422	LINC01516	186.447	-1.2566	1.35692e-15	3.26387e-14
ENSG00000104765	BNIP3L	1955.81	0.640113	1.38358e-15	3.32412e-14
ENSG00000145386	CCNA2	1528.53	-0.620856	1.39387e-15	3.34497e-14
ENSG00000198912	C1orf174	755.986	-0.524648	1.42417e-15	3.41371e-14
ENSG00000181019	NQO1	6359.16	0.745071	1.5219e-15	3.64375e-14
ENSG00000163808	KIF15	1052.69	-0.627317	1.57163e-15	3.75846e-14
ENSG00000051341	POLQ	2224.76	-0.634303	1.75183e-15	4.18457e-14
ENSG00000150753	CCT5	11387	-0.339819	1.75806e-15	4.1946e-14
ENSG00000115091	ACTR3	5517.16	-0.380546	1.77063e-15	4.21488e-14
ENSG00000185133	INPP5J	450.714	0.746777	1.76978e-15	4.21488e-14
ENSG00000143344	RGL1	349.691	0.697438	1.78479e-15	4.24369e-14
ENSG00000197771	MCMBP	2926.09	-0.501793	1.79856e-15	4.27152e-14
ENSG00000134453	RBM17	1907.64	-0.366393	1.86233e-15	4.4179e-14
ENSG00000100416	TRMU	1869.92	-0.407974	1.95828e-15	4.6402e-14
ENSG00000086062	B4GALT1	4492.54	0.316371	1.98372e-15	4.69511e-14
ENSG00000156639	ZFAND3	2123.56	0.358184	2.00784e-15	4.74135e-14
ENSG00000163435	ELF3	583.454	0.708731	2.00784e-15	4.74135e-14
ENSG00000130299	GTPBP3	1129.29	-0.614144	2.16606e-15	5.10914e-14
ENSG00000124766	SOX4	6911.03	0.369129	2.17693e-15	5.12894e-14
ENSG00000077514	POLD3	1120.46	-0.547976	2.25577e-15	5.305e-14
ENSG00000168827	GFM1	4655.06	-0.380304	2.25679e-15	5.305e-14
ENSG00000101187	SLCO4A1	1161.52	-0.459449	2.34643e-15	5.50945e-14
ENSG00000114491	UMPS	1978.89	-0.465985	2.91444e-15	6.83538e-14
ENSG00000248144	ADH1C	42.6509	-2.37619	3.06081e-15	7.17053e-14
ENSG00000140044	JDP2	638.687	0.702662	3.30734e-15	7.73932e-14
ENSG00000175216	CKAP5	10923.8	-0.328468	3.32561e-15	7.77329e-14
ENSG00000173812	EIF1	16173.5	0.298594	3.3331e-15	7.78199e-14
ENSG00000168439	STIP1	10712.2	-0.459662	3.35816e-15	7.83167e-14
ENSG00000166295	ANAPC16	1558.77	0.493711	3.40808e-15	7.93915e-14
ENSG00000206190	ATP10A	557.427	-0.557298	3.45143e-15	8.03109e-14
ENSG00000130707	ASS1	2211.26	0.55073	3.47813e-15	8.08411e-14
ENSG00000152503	TRIM36	955.566	-0.689656	3.49321e-15	8.11004e-14
ENSG00000213694	S1PR3	239.215	-0.84945	3.60696e-15	8.36475e-14
ENSG00000051180	RAD51	463.799	-0.668619	3.76854e-15	8.72968e-14
ENSG00000093167	LRRFIP2	1776.18	-0.309226	3.9493e-15	9.13817e-14
ENSG00000143748	NVL	2724.94	-0.311118	4.11392e-15	9.50843e-14
ENSG00000114423	CBLB	587.27	0.651218	4.33359e-15	1.0005e-13
ENSG00000122203	KIAA1191	3325.24	0.375072	5.08976e-15	1.17377e-13
ENSG00000183049	CAMK1D	55.0579	1.89245	5.76195e-15	1.3273e-13
ENSG00000163002	NUP35	652.111	-0.574492	5.8429e-15	1.34445e-13
ENSG00000172469	MANEA	1735.77	0.879585	6.1117e-15	1.40474e-13
ENSG00000142197	DOP1B	1855.39	0.365654	6.23355e-15	1.43116e-13
ENSG00000124151	NCOA3	1169.98	0.501274	6.68271e-15	1.53258e-13
ENSG00000183765	CHEK2	1027.93	-0.517272	6.80972e-15	1.55998e-13
ENSG00000060971	ACAA1	2642.53	-0.492032	6.85468e-15	1.56854e-13
ENSG00000143569	UBAP2L	8825.76	-0.346572	6.91281e-15	1.58009e-13
ENSG00000147010	SH3KBP1	562.657	0.630887	7.0995e-15	1.62097e-13
ENSG00000140391	TSPAN3	2571.34	0.457545	7.38043e-15	1.68326e-13
ENSG00000108671	PSMD11	4528.59	-0.344661	7.46863e-15	1.7015e-13
ENSG00000179241	LDLRAD3	961.342	-0.495376	7.68999e-15	1.75e-13
ENSG00000129351	ILF3	15394.8	-0.48005	7.84652e-15	1.78366e-13
ENSG00000204514	ZNF814	1382.95	-0.522198	7.88549e-15	1.79055e-13
ENSG00000126500	FLRT1	18.8649	2.76916	7.98266e-15	1.81063e-13
ENSG00000142687	KIAA0319L	4149.75	0.365549	8.00928e-15	1.81468e-13
ENSG00000065054	SLC9A3R2	2039.25	-0.758595	8.08929e-15	1.8308e-13
ENSG00000100591	AHSA1	4569.18	-0.50439	9.23392e-15	2.08529e-13
ENSG00000165490	DDIAS	767.33	-0.967983	9.22571e-15	2.08529e-13
ENSG00000198951	NAGA	1657.81	-0.36388	9.4654e-15	2.13524e-13
ENSG00000146223	RPL7L1	5955.37	-0.301719	9.68921e-15	2.18334e-13
ENSG00000112715	VEGFA	1541.83	0.547238	9.93213e-15	2.23565e-13
ENSG00000144452	ABCA12	225.588	0.971709	1.09109e-14	2.45329e-13
ENSG00000147408	CSGALNACT1	101.598	-1.31958	1.12085e-14	2.51747e-13
ENSG00000197903	HIST1H2BK	16011	-0.560994	1.15635e-14	2.59438e-13
ENSG00000109685	NSD2	7914.87	-0.348217	1.15865e-14	2.59674e-13
ENSG00000125485	DDX31	1286.75	-0.449434	1.16032e-14	2.59767e-13
ENSG00000164211	STARD4	316.158	1.0118	1.26674e-14	2.83284e-13
ENSG00000148700	ADD3	3470.89	0.439323	1.31307e-14	2.93327e-13
ENSG00000141965	FEM1A	3956.1	-0.41375	1.35289e-14	3.01897e-13
ENSG00000078804	TP53INP2	1529.12	0.524687	1.48084e-14	3.30092e-13
ENSG00000159267	HLCS	1410.6	0.350706	1.49537e-14	3.32973e-13
ENSG00000137962	ARHGAP29	2262.86	0.894568	1.50104e-14	3.33876e-13
ENSG00000120539	MASTL	664.694	-0.495954	1.50727e-14	3.34902e-13
ENSG00000121039	RDH10	612.799	0.577613	1.54519e-14	3.42959e-13
ENSG00000214756	CSKMT	757.262	-0.536405	1.56019e-14	3.45917e-13
ENSG00000165724	ZMYND19	1113.02	-0.595857	1.61364e-14	3.57385e-13
ENSG00000163993	S100P	127.546	1.40182	1.6463e-14	3.64229e-13
ENSG00000189306	RRP7A	2991.77	-0.682975	1.65618e-14	3.66023e-13
ENSG00000135365	PHF21A	1370.65	0.476319	1.70334e-14	3.76043e-13
ENSG00000013573	DDX11	1201.99	-0.640805	1.8146e-14	4.00179e-13
ENSG00000197622	CDC42SE1	5172.33	-0.291394	1.84963e-14	4.0747e-13
ENSG00000135677	GNS	5078.52	0.318212	1.91015e-14	4.20355e-13
ENSG00000172365	OR5B2	28.0876	-2.92877	1.92134e-14	4.22369e-13
ENSG00000198624	CCDC69	184.228	0.88493	1.94175e-14	4.26401e-13
ENSG00000105821	DNAJC2	1173.34	-0.476205	1.95124e-14	4.28031e-13
ENSG00000100335	MIEF1	3875.09	-0.308956	1.99248e-14	4.36615e-13
ENSG00000183684	ALYREF	3418.05	-0.512902	2.00752e-14	4.39445e-13
ENSG00000117592	PRDX6	11042.7	-0.354622	2.05244e-14	4.48803e-13
ENSG00000140743	CDR2	509.576	-0.574294	2.0597e-14	4.49915e-13
ENSG00000188848	BEND4	1225.84	-0.700324	2.07836e-14	4.53513e-13
ENSG00000188312	CENPP	527.966	-0.546884	2.15478e-14	4.69693e-13
ENSG00000134030	CTIF	404.104	0.74253	2.17357e-14	4.73289e-13
ENSG00000077152	UBE2T	1697.27	-0.560726	2.18647e-14	4.75598e-13
ENSG00000179082	C9orf106	151.345	1.06158	2.19717e-14	4.77423e-13
ENSG00000198042	MAK16	2657.66	-0.446373	2.24203e-14	4.86659e-13
ENSG00000006740	ARHGAP44	862.044	0.484532	2.38711e-14	5.17607e-13
ENSG00000040341	STAU2	1027.88	0.490002	2.46508e-14	5.33954e-13
ENSG00000103460	TOX3	145.111	0.987695	2.5196e-14	5.45192e-13
ENSG00000160072	ATAD3B	1748	-0.720032	2.63722e-14	5.70048e-13
ENSG00000160190	SLC37A1	1158.7	0.476514	2.64647e-14	5.71449e-13
ENSG00000163412	EIF4E3	327.243	0.759632	2.6759e-14	5.77201e-13
ENSG00000107949	BCCIP	2901.12	-0.446188	2.69118e-14	5.79893e-13
ENSG00000151881	TMEM267	332.579	0.977263	2.76318e-14	5.94788e-13
ENSG00000150667	FSIP1	116.128	1.34753	2.81279e-14	6.04838e-13
ENSG00000157483	MYO1E	851.602	-0.41623	2.83046e-14	6.08005e-13
ENSG00000012223	LTF	37.8687	2.05407	2.95734e-14	6.34602e-13
ENSG00000196950	SLC39A10	1405.96	-0.770449	3.0352e-14	6.50633e-13
ENSG00000062822	POLD1	1308.54	-0.746385	3.03896e-14	6.50765e-13
ENSG00000170006	TMEM154	115.883	1.20555	3.04728e-14	6.51873e-13
ENSG00000111885	MAN1A1	89.5373	1.35551	3.06715e-14	6.55445e-13
ENSG00000184381	PLA2G6	1152.9	0.498421	3.14874e-14	6.72186e-13
ENSG00000171604	CXXC5	804.042	0.53949	3.58876e-14	7.65331e-13
ENSG00000177570	SAMD12	456.164	0.672484	3.8467e-14	8.19493e-13
ENSG00000175643	RMI2	461.973	-0.724861	4.32374e-14	9.20174e-13
ENSG00000259279	NA	49.1021	1.64217	4.37397e-14	9.29907e-13
ENSG00000165732	DDX21	11610.2	-0.463294	4.40075e-14	9.3464e-13
ENSG00000172183	ISG20	311.988	0.850732	4.4598e-14	9.4621e-13
ENSG00000076554	TPD52	3096.71	-0.507773	4.52821e-14	9.59739e-13
ENSG00000132603	NIP7	1678.67	-0.453757	4.81639e-14	1.01977e-12
ENSG00000106049	HIBADH	1836	0.368259	4.90287e-14	1.03702e-12
ENSG00000168806	LCMT2	1626.2	-0.403287	5.15881e-14	1.09004e-12
ENSG00000132122	SPATA6	224.886	0.863702	5.29456e-14	1.11758e-12
ENSG00000182224	CYB5D1	2014.66	-0.417152	5.55704e-14	1.17179e-12
ENSG00000122687	MRM2	1751.46	-0.474362	5.68432e-14	1.19741e-12
ENSG00000164463	CREBRF	279.6	0.831222	5.97622e-14	1.25762e-12
ENSG00000148606	POLR3A	3381.4	-0.251609	6.04843e-14	1.27152e-12
ENSG00000166783	MARF1	2620.04	0.372207	6.30854e-14	1.32486e-12
ENSG00000076513	ANKRD13A	2034.96	0.354851	6.41244e-14	1.34531e-12
ENSG00000102098	SCML2	672.859	-0.490225	6.54413e-14	1.37155e-12
ENSG00000145284	SCD5	373.382	0.691139	6.95454e-14	1.45609e-12
ENSG00000119801	YPEL5	453.575	0.730624	6.98069e-14	1.46009e-12
ENSG00000146648	EGFR	3957.89	-0.315369	7.17757e-14	1.49975e-12
ENSG00000137054	POLR1E	2500.6	-0.390109	7.71804e-14	1.61105e-12
ENSG00000079841	RIMS1	1727.93	0.455042	7.86872e-14	1.64085e-12
ENSG00000102967	DHODH	1089.41	-0.515614	8.08788e-14	1.68485e-12
ENSG00000123136	DDX39A	3142.67	-0.583038	8.19115e-14	1.70465e-12
ENSG00000250148	KRT8P31	47.1156	-2.3559	8.31416e-14	1.72851e-12
ENSG00000117597	UTP25	1333.32	-0.388818	8.36858e-14	1.73808e-12
ENSG00000128191	DGCR8	2114.11	-0.535345	8.57222e-14	1.77858e-12
ENSG00000132196	HSD17B7	553.393	0.585405	8.59541e-14	1.78161e-12
ENSG00000198911	SREBF2	7973.91	0.384879	8.64287e-14	1.78965e-12
ENSG00000066044	ELAVL1	4963.52	-0.26724	8.88024e-14	1.83697e-12
ENSG00000224087	AC018865.1	34.8634	-2.38519	9.14253e-14	1.88933e-12
ENSG00000123240	OPTN	142.538	1.09141	9.37712e-14	1.93588e-12
ENSG00000118217	ATF6	1881.66	0.332719	9.84577e-14	2.02858e-12
ENSG00000155629	PIK3AP1	319.405	-0.765254	9.83978e-14	2.02858e-12
ENSG00000198626	RYR2	615.914	0.567149	9.90867e-14	2.03951e-12
ENSG00000156642	NPTN	1325.26	0.352397	1.00913e-13	2.07504e-12
ENSG00000033050	ABCF2	3555.29	-0.401853	1.01268e-13	2.08027e-12
ENSG00000164300	SERINC5	3050.93	-0.327229	1.01705e-13	2.08717e-12
ENSG00000021300	PLEKHB1	4464.94	0.4633	1.10589e-13	2.26725e-12
ENSG00000144840	RABL3	1106.82	0.565097	1.15519e-13	2.36597e-12
ENSG00000095002	MSH2	400.2	-0.707465	1.19233e-13	2.43962e-12
ENSG00000181444	ZNF467	542.023	0.760381	1.21578e-13	2.48514e-12
ENSG00000154978	VOPP1	958.667	0.471977	1.22135e-13	2.49159e-12
ENSG00000164088	PPM1M	158.161	1.10007	1.22047e-13	2.49159e-12
ENSG00000143013	LMO4	1037.05	0.465638	1.27499e-13	2.59847e-12
ENSG00000038002	AGA	449.238	0.643801	1.31588e-13	2.67915e-12
ENSG00000173706	HEG1	231.527	0.797369	1.34107e-13	2.72776e-12
ENSG00000150961	SEC24D	1070.13	0.513562	1.35675e-13	2.75694e-12
ENSG00000185963	BICD2	1258.61	-1.1202	1.36768e-13	2.77643e-12
ENSG00000007376	RPUSD1	1364.38	-0.603421	1.38289e-13	2.80456e-12
ENSG00000172175	MALT1	1583.53	-0.64218	1.46872e-13	2.97571e-12
ENSG00000178921	PFAS	1789.27	-0.818595	1.49185e-13	3.0196e-12
ENSG00000196313	POM121	1284.47	-0.421305	1.49365e-13	3.0203e-12
ENSG00000149480	MTA2	7222.68	-0.3313	1.53818e-13	3.10731e-12
ENSG00000054793	ATP9A	3589.65	0.334891	1.54353e-13	3.11507e-12
ENSG00000123600	METTL8	1099.95	-0.514554	1.54599e-13	3.11698e-12
ENSG00000185633	NDUFA4L2	73.7932	1.44183	1.61374e-13	3.25041e-12
ENSG00000105204	DYRK1B	869.704	0.598674	1.63611e-13	3.29228e-12
ENSG00000204385	SLC44A4	1079.83	0.50413	1.64953e-13	3.31606e-12
ENSG00000111859	NEDD9	302.405	0.715796	1.65984e-13	3.33354e-12
ENSG00000102226	USP11	1208.92	0.515399	1.66888e-13	3.34844e-12
ENSG00000131873	CHSY1	2169.15	-0.368801	1.78589e-13	3.57974e-12
ENSG00000084463	WBP11	3267.25	-0.351528	1.90599e-13	3.81677e-12
ENSG00000012963	UBR7	1803.61	-0.42476	1.95371e-13	3.90856e-12
ENSG00000171492	LRRC8D	1781.69	0.649719	1.96663e-13	3.93061e-12
ENSG00000019549	SNAI2	40.9149	-1.99874	1.97626e-13	3.94603e-12
ENSG00000169692	AGPAT2	525.551	0.810285	1.99093e-13	3.9715e-12
ENSG00000107745	MICU1	2110.46	0.369798	2.05766e-13	4.10064e-12
ENSG00000153029	MR1	247.967	0.851578	2.07221e-13	4.12567e-12
ENSG00000137804	NUSAP1	4276.06	-0.471359	2.10502e-13	4.18524e-12
ENSG00000226200	SGMS1-AS1	209.262	0.894362	2.10618e-13	4.18524e-12
ENSG00000230234	AL162582.1	356.592	0.634279	2.17982e-13	4.32743e-12
ENSG00000070214	SLC44A1	2764.88	0.589273	2.18289e-13	4.32937e-12
ENSG00000249348	UGDH-AS1	180.235	0.869753	2.18536e-13	4.33011e-12
ENSG00000141934	PLPP2	446.948	0.795786	2.21224e-13	4.37751e-12
ENSG00000196305	IARS	10257.9	0.305255	2.21352e-13	4.37751e-12
ENSG00000099250	NRP1	4399.8	-0.330353	2.24697e-13	4.43943e-12
ENSG00000184205	TSPYL2	261.831	0.801474	2.35644e-13	4.65127e-12
ENSG00000159556	ISL2	108.427	1.23153	2.37269e-13	4.67887e-12
ENSG00000141458	NPC1	2866.8	-0.338189	2.50432e-13	4.93374e-12
ENSG00000068745	IP6K2	3679.45	0.327596	2.51307e-13	4.94628e-12
ENSG00000135596	MICAL1	535.908	-0.775014	2.5406e-13	4.9957e-12
ENSG00000099901	RANBP1	6106.56	-0.572886	2.54596e-13	5.00148e-12
ENSG00000143412	ANXA9	185.819	0.937003	2.55083e-13	5.0063e-12
ENSG00000188486	H2AFX	10414.5	-0.604423	2.64979e-13	5.19561e-12
ENSG00000101407	TTI1	1245.2	-0.384497	2.65989e-13	5.21046e-12
ENSG00000090661	CERS4	1033.76	0.624166	2.66921e-13	5.22378e-12
ENSG00000143398	PIP5K1A	4095.64	-0.250465	2.70897e-13	5.29658e-12
ENSG00000145087	STXBP5L	7843.66	0.554933	2.76056e-13	5.39234e-12
ENSG00000116016	EPAS1	211.798	0.790007	2.90687e-13	5.67279e-12
ENSG00000070495	JMJD6	901.395	-0.536458	2.92853e-13	5.70966e-12
ENSG00000080546	SESN1	1316.39	0.596458	2.93663e-13	5.72007e-12
ENSG00000117748	RPA2	1832.42	-0.533725	2.97107e-13	5.7817e-12
ENSG00000138162	TACC2	2594.44	0.718519	3.1698e-13	6.16264e-12
ENSG00000176624	MEX3C	1786.71	0.430757	3.19956e-13	6.21465e-12
ENSG00000142528	ZNF473	891.239	-0.481141	3.29847e-13	6.40076e-12
ENSG00000188229	TUBB4B	18145.6	-0.52071	3.30937e-13	6.4159e-12
ENSG00000115207	GTF3C2	2664.72	-0.366429	3.32747e-13	6.44495e-12
ENSG00000087269	NOP14	3731.6	-0.764778	3.36335e-13	6.50835e-12
ENSG00000134324	LPIN1	1909.41	0.396536	3.54906e-13	6.8613e-12
ENSG00000067533	RRP15	962.931	-0.429673	3.69216e-13	7.13128e-12
ENSG00000065150	IPO5	6644.72	-0.375524	3.70812e-13	7.15543e-12
ENSG00000146918	NCAPG2	2795.02	-0.370655	4.00392e-13	7.71903e-12
ENSG00000144115	THNSL2	1678.05	0.410201	4.08322e-13	7.86457e-12
ENSG00000163528	CHCHD4	1015.63	-0.539809	4.15689e-13	7.99902e-12
ENSG00000043355	ZIC2	917.613	0.448684	4.2975e-13	8.26191e-12
ENSG00000198796	ALPK2	25.8353	-2.5458	4.32146e-13	8.30026e-12
ENSG00000137460	FHDC1	1177.39	-0.423794	4.32858e-13	8.30622e-12
ENSG00000170412	GPRC5C	339.29	0.881295	4.52922e-13	8.68318e-12
ENSG00000258162	AC069228.1	90.6333	1.52766	4.561e-13	8.736e-12
ENSG00000156599	ZDHHC5	5783.64	-0.230196	4.74756e-13	9.08492e-12
ENSG00000133812	SBF2	2533.04	0.352851	4.83204e-13	9.23803e-12
ENSG00000168575	SLC20A2	1252.3	0.386891	5.0086e-13	9.56675e-12
ENSG00000115241	PPM1G	3963.96	-0.659009	5.08822e-13	9.70987e-12
ENSG00000167173	C15orf39	1156.38	-0.580695	5.45167e-13	1.03939e-11
ENSG00000163625	WDFY3	5101.37	0.426335	5.51423e-13	1.05034e-11
ENSG00000110435	PDHX	2499.75	-0.286075	5.56837e-13	1.05968e-11
ENSG00000143878	RHOB	2577.45	0.375914	5.60953e-13	1.06653e-11
ENSG00000114770	ABCC5	2721.35	0.484276	5.62566e-13	1.06862e-11
ENSG00000114200	BCHE	1846.02	0.596631	5.66486e-13	1.07508e-11
ENSG00000149179	C11orf49	689.526	0.516122	5.68843e-13	1.07856e-11
ENSG00000165322	ARHGAP12	894.072	0.557555	5.70324e-13	1.08038e-11
ENSG00000064419	TNPO3	3591.72	-0.268998	5.99406e-13	1.13443e-11
ENSG00000171160	MORN4	691.972	0.485163	6.02893e-13	1.13999e-11
ENSG00000259129	LINC00648	287.232	0.946612	6.35364e-13	1.20029e-11
ENSG00000132330	SCLY	252.323	-0.89776	6.37563e-13	1.20334e-11
ENSG00000108578	BLMH	1322.08	-0.37062	6.62506e-13	1.24928e-11
ENSG00000109971	HSPA8	81118.2	-0.394205	6.79543e-13	1.28024e-11
ENSG00000139514	SLC7A1	9450.05	0.317852	6.83664e-13	1.28683e-11
ENSG00000171067	C11orf24	1389.78	-0.549583	7.12737e-13	1.34033e-11
ENSG00000166900	STX3	2085.23	0.341761	7.33625e-13	1.37836e-11
ENSG00000138801	PAPSS1	2024.53	0.290414	7.36607e-13	1.38271e-11
ENSG00000111653	ING4	431.419	0.654776	7.57509e-13	1.42065e-11
ENSG00000179918	SEPHS2	3321.82	0.370018	7.70009e-13	1.44279e-11
ENSG00000198964	SGMS1	1145.44	0.438706	7.94378e-13	1.4871e-11
ENSG00000164167	LSM6	448.741	-0.629113	7.99967e-13	1.49621e-11
ENSG00000184144	CNTN2	22.5086	2.63169	8.00756e-13	1.49634e-11
ENSG00000271614	ATP2B1-AS1	81.9555	1.37157	8.0909e-13	1.51054e-11
ENSG00000101333	PLCB4	3573.31	0.457996	8.38353e-13	1.56354e-11
ENSG00000106263	EIF3B	12513.1	-0.536449	8.38986e-13	1.56354e-11
ENSG00000135801	TAF5L	1220.02	-0.415386	8.46465e-13	1.57606e-11
ENSG00000120438	TCP1	15341.1	-0.299869	8.47978e-13	1.57745e-11
ENSG00000089154	GCN1	11357.6	-0.538416	8.71932e-13	1.62056e-11
ENSG00000188177	ZC3H6	358.175	0.729839	8.82369e-13	1.63848e-11
ENSG00000160194	NDUFV3	2593.41	-0.356314	9.07449e-13	1.68354e-11
ENSG00000130522	JUND	1899.24	0.595975	9.6017e-13	1.77976e-11
ENSG00000221890	NPTXR	1309.4	0.51697	9.73766e-13	1.80334e-11
ENSG00000162496	DHRS3	177.783	0.981058	1.0112e-12	1.87098e-11
ENSG00000114648	KLHL18	1722.37	-0.39638	1.0408e-12	1.92405e-11
ENSG00000177181	RIMKLA	850.596	0.437446	1.08167e-12	1.9978e-11
ENSG00000116649	SRM	6066.06	-0.504725	1.12155e-12	2.06962e-11
ENSG00000204406	MBD5	649.42	0.598175	1.13341e-12	2.08963e-11
ENSG00000137693	YAP1	1966.68	0.503835	1.14211e-12	2.1038e-11
ENSG00000044524	EPHA3	2776.5	0.31345	1.14763e-12	2.11209e-11
ENSG00000163961	RNF168	2737.81	-0.688983	1.1842e-12	2.17745e-11
ENSG00000125166	GOT2	9085.37	-0.325653	1.21164e-12	2.22593e-11
ENSG00000100439	ABHD4	2085.58	0.512951	1.25492e-12	2.3034e-11
ENSG00000162928	PEX13	978.818	0.493155	1.2651e-12	2.32003e-11
ENSG00000171497	PPID	1514.63	-0.352797	1.33415e-12	2.44448e-11
ENSG00000096384	HSP90AB1	44323.7	-0.36472	1.34178e-12	2.45629e-11
ENSG00000105186	ANKRD27	1786.25	-0.313294	1.40167e-12	2.56365e-11
ENSG00000110172	CHORDC1	3061.74	-0.463116	1.41941e-12	2.59381e-11
ENSG00000204103	MAFB	2971.02	-0.285077	1.56439e-12	2.85621e-11
ENSG00000171503	ETFDH	1126.83	0.34584	1.59703e-12	2.91324e-11
ENSG00000083857	FAT1	5825.73	-0.366657	1.6126e-12	2.93905e-11
ENSG00000157214	STEAP2	18945.8	0.575521	1.67844e-12	3.05635e-11
ENSG00000185634	SHC4	56.7347	1.5207	1.69845e-12	3.09008e-11
ENSG00000156804	FBXO32	170.49	0.97775	1.71331e-12	3.11438e-11
ENSG00000160058	BSDC1	1872.1	0.381685	1.76704e-12	3.20922e-11
ENSG00000168032	ENTPD3	52.5921	1.61625	1.77445e-12	3.21984e-11
ENSG00000134352	IL6ST	2547.39	0.638343	1.79161e-12	3.24813e-11
ENSG00000086061	DNAJA1	9558.1	-0.358168	1.84694e-12	3.34552e-11
ENSG00000132510	KDM6B	3738.84	0.517713	1.89469e-12	3.42901e-11
ENSG00000135226	UGT2B28	35.7057	-1.86958	2.06368e-12	3.73159e-11
ENSG00000128908	INO80	1913.92	-0.313335	2.09807e-12	3.79045e-11
ENSG00000112796	ENPP5	220.23	0.852284	2.12291e-12	3.83199e-11
ENSG00000175161	CADM2	78.6966	-1.26131	2.19769e-12	3.96351e-11
ENSG00000118513	MYB	368.037	-0.669048	2.26376e-12	4.07911e-11
ENSG00000105939	ZC3HAV1	5137.34	-0.337474	2.27761e-12	4.1005e-11
ENSG00000184838	PRR16	32.7091	-2.21613	2.29488e-12	4.12799e-11
ENSG00000100867	DHRS2	397.041	-0.615572	2.30003e-12	4.13367e-11
ENSG00000165495	PKNOX2	600.524	0.571919	2.47153e-12	4.43803e-11
ENSG00000251192	ZNF674	240.433	0.792909	2.5593e-12	4.59164e-11
ENSG00000111364	DDX55	1600.59	-0.321155	2.5625e-12	4.59341e-11
ENSG00000196220	SRGAP3	551.609	0.58323	2.5731e-12	4.60842e-11
ENSG00000166166	TRMT61A	951.808	-0.619447	2.62269e-12	4.69317e-11
ENSG00000004478	FKBP4	14286	-0.411833	2.78683e-12	4.98257e-11
ENSG00000267278	MAP3K14-AS1	193.907	0.858569	2.79961e-12	5.0011e-11
ENSG00000007202	KIAA0100	17472.8	-0.296926	2.82091e-12	5.03479e-11
ENSG00000100104	SRRD	1365.11	-0.340391	2.83496e-12	5.05551e-11
ENSG00000120519	SLC10A7	951.012	-0.554277	2.89318e-12	5.15489e-11
ENSG00000152147	GEMIN6	496.293	-0.570488	2.93147e-12	5.21862e-11
ENSG00000108924	HLF	575.188	-0.548369	3.03025e-12	5.38984e-11
ENSG00000110925	CSRNP2	1187.98	0.389296	3.04283e-12	5.40756e-11
ENSG00000135116	HRK	40.9088	1.73285	3.07913e-12	5.46737e-11
ENSG00000162377	COA7	1142.05	-0.432105	3.12918e-12	5.55148e-11
ENSG00000229056	AC020571.1	101.684	-1.35161	3.40164e-12	6.02968e-11
ENSG00000127418	FGFRL1	6539.59	-0.404817	3.4058e-12	6.03188e-11
ENSG00000157064	NMNAT2	456.342	0.556427	3.41616e-12	6.04505e-11
ENSG00000134001	EIF2S1	5321.9	-0.402629	3.42415e-12	6.05402e-11
ENSG00000185650	ZFP36L1	1561.04	0.352479	3.53977e-12	6.25309e-11
ENSG00000056661	NA	2110.32	0.47292	3.63522e-12	6.41622e-11
ENSG00000131374	TBC1D5	3055.23	0.332302	3.70364e-12	6.53142e-11
ENSG00000060237	WNK1	12083.1	-0.283978	3.74118e-12	6.59199e-11
ENSG00000126883	NUP214	3941.2	-0.316371	3.764e-12	6.62656e-11
ENSG00000168734	PKIG	471.207	0.784987	3.97533e-12	6.99265e-11
ENSG00000169188	APEX2	1775.81	-0.537186	4.3149e-12	7.58352e-11
ENSG00000166411	IDH3A	1818.77	-0.330263	4.32909e-12	7.602e-11
ENSG00000165475	CRYL1	873.803	0.485103	4.3634e-12	7.65574e-11
ENSG00000131016	AKAP12	48.2671	-2.64811	4.43203e-12	7.76957e-11
ENSG00000187555	USP7	6794.53	-0.352534	4.47637e-12	7.84067e-11
ENSG00000176953	NFATC2IP	1907.63	-0.29014	4.59721e-12	8.03871e-11
ENSG00000186416	NKRF	1043.13	-0.388381	4.59562e-12	8.03871e-11
ENSG00000100027	YPEL1	207.77	0.756057	4.63027e-12	8.08967e-11
ENSG00000159399	HK2	2165.83	-0.733064	4.67043e-12	8.15295e-11
ENSG00000077092	RARB	240.266	-0.834509	4.72112e-12	8.23449e-11
ENSG00000110060	PUS3	970.878	-0.446228	4.95331e-12	8.63219e-11
ENSG00000049246	PER3	2057.66	-0.307091	5.05601e-12	8.80376e-11
ENSG00000124508	BTN2A2	333.371	0.712186	5.27633e-12	9.17966e-11
ENSG00000175582	RAB6A	3201.08	0.513628	5.52026e-12	9.59598e-11
ENSG00000196331	NA	3047.64	-0.69005	5.54059e-12	9.62323e-11
ENSG00000111276	CDKN1B	1832.11	0.404536	5.62322e-12	9.75856e-11
ENSG00000104164	BLOC1S6	3814.2	0.525397	5.6474e-12	9.7923e-11
ENSG00000035928	RFC1	4019.87	-0.369602	5.67571e-12	9.83314e-11
ENSG00000082556	OPRK1	48.4679	1.74492	5.8642e-12	1.01512e-10
ENSG00000165572	KBTBD6	1556.85	-0.346497	5.93665e-12	1.0268e-10
ENSG00000066135	KDM4A	2965.1	0.465317	6.10704e-12	1.05539e-10
ENSG00000128833	MYO5C	4397.3	-0.305617	6.15037e-12	1.06199e-10
ENSG00000142065	ZFP14	330.116	0.636961	6.24055e-12	1.07666e-10
ENSG00000173638	SLC19A1	1542.82	-0.419108	6.26488e-12	1.07996e-10
ENSG00000196584	XRCC2	1067.03	-0.639963	6.2722e-12	1.08032e-10
ENSG00000180957	PITPNB	879.76	-0.402608	6.33216e-12	1.08974e-10
ENSG00000021826	CPS1	490.998	0.532287	6.64731e-12	1.14303e-10
ENSG00000074590	NUAK1	229.573	0.701196	6.7568e-12	1.16089e-10
ENSG00000104154	SLC30A4	10166.3	0.540781	6.95569e-12	1.19407e-10
ENSG00000142784	WDTC1	1592.98	0.437295	6.98712e-12	1.19796e-10
ENSG00000143067	ZNF697	301.985	-0.799576	6.98996e-12	1.19796e-10
ENSG00000160877	NACC1	7901.95	-0.369318	7.00304e-12	1.19921e-10
ENSG00000271936	AC012073.1	218.966	-0.762745	7.07293e-12	1.21018e-10
ENSG00000138166	DUSP5	123.149	0.912916	7.2757e-12	1.24384e-10
ENSG00000100003	SEC14L2	327.612	-0.63494	7.55947e-12	1.29129e-10
ENSG00000116141	MARK1	354.797	0.641616	7.7445e-12	1.3218e-10
ENSG00000153113	CAST	2797.36	0.332633	7.81137e-12	1.33212e-10
ENSG00000112276	BVES	73.3615	1.25402	7.89403e-12	1.34511e-10
ENSG00000183431	SF3A3	4158.85	-0.335002	7.95046e-12	1.35361e-10
ENSG00000113649	TCERG1	2864.19	-0.396505	8.16494e-12	1.38898e-10
ENSG00000105127	AKAP8	1263.89	-0.502379	8.99319e-12	1.52862e-10
ENSG00000157456	CCNB2	2130.16	-0.358152	9.06389e-12	1.53937e-10
ENSG00000142733	MAP3K6	547.532	-0.601045	9.26749e-12	1.57266e-10
ENSG00000102908	NFAT5	7255.8	0.603186	9.31649e-12	1.57944e-10
ENSG00000143061	IGSF3	526.559	0.648634	9.3227e-12	1.57944e-10
ENSG00000159842	ABR	2321.01	0.455645	9.68076e-12	1.63876e-10
ENSG00000116679	IVNS1ABP	1892.89	-0.520126	9.85949e-12	1.66765e-10
ENSG00000233215	LINC01687	807.883	0.608949	9.91152e-12	1.67508e-10
ENSG00000148843	PDCD11	5294.11	-0.714282	9.97031e-12	1.68364e-10
ENSG00000141441	GAREM1	591.312	0.443763	1.00059e-11	1.68826e-10
ENSG00000273015	AC008124.1	720.404	0.469385	1.00503e-11	1.69439e-10
ENSG00000135723	FHOD1	1538.28	-0.467755	1.0741e-11	1.80788e-10
ENSG00000248019	FAM13A-AS1	471.758	-0.893754	1.07376e-11	1.80788e-10
ENSG00000123473	STIL	1673.54	-0.458054	1.0753e-11	1.80842e-10
ENSG00000188112	C6orf132	2533.21	-0.415686	1.08884e-11	1.82971e-10
ENSG00000042445	RETSAT	1714.52	0.339754	1.0999e-11	1.8468e-10
ENSG00000172239	PAIP1	2183.77	0.445161	1.1056e-11	1.85486e-10
ENSG00000198785	GRIN3A	268.237	-0.687594	1.11152e-11	1.86328e-10
ENSG00000163817	SLC6A20	18.6554	3.03391	1.11458e-11	1.8669e-10
ENSG00000178607	ERN1	1090.01	0.415174	1.1173e-11	1.86993e-10
ENSG00000140459	CYP11A1	50.0413	-1.82094	1.1407e-11	1.90757e-10
ENSG00000152439	ZNF773	452.692	0.529928	1.20996e-11	2.02175e-10
ENSG00000269728	NA	273.385	-1.19292	1.25507e-11	2.09543e-10
ENSG00000143799	PARP1	12162.7	-0.800836	1.25699e-11	2.09694e-10
ENSG00000169047	IRS1	284.109	-0.685664	1.26269e-11	2.10475e-10
ENSG00000162734	PEA15	3942.05	-0.415731	1.26594e-11	2.10847e-10
ENSG00000196091	MYBPC1	39.4229	-1.96188	1.29369e-11	2.15296e-10
ENSG00000132964	CDK8	818.242	0.523746	1.30671e-11	2.17288e-10
ENSG00000132341	RAN	16244.1	-0.371334	1.34695e-11	2.23799e-10
ENSG00000120948	TARDBP	5098.42	-0.266873	1.35466e-11	2.249e-10
ENSG00000149798	CDC42EP2	423.296	-0.62853	1.37561e-11	2.28195e-10
ENSG00000225210	DUXAP9	762.941	-0.755422	1.37987e-11	2.28718e-10
ENSG00000163536	SERPINI1	247.186	0.805175	1.38169e-11	2.28836e-10
ENSG00000116161	CACYBP	3273.38	-0.421135	1.40012e-11	2.31703e-10
ENSG00000140718	FTO	1985.87	0.315448	1.41268e-11	2.33595e-10
ENSG00000128050	PAICS	14947.2	-0.328392	1.49922e-11	2.47706e-10
ENSG00000104689	TNFRSF10A	1256.99	-0.367977	1.55876e-11	2.57339e-10
ENSG00000117394	SLC2A1	1669.84	-0.454394	1.60087e-11	2.6408e-10
ENSG00000128891	CCDC32	687.579	0.509492	1.75633e-11	2.89493e-10
ENSG00000106554	CHCHD3	1821.55	-0.401449	1.76382e-11	2.90496e-10
ENSG00000124789	NUP153	3781.16	-0.427891	1.80542e-11	2.97112e-10
ENSG00000123104	ITPR2	646.394	0.612333	1.83057e-11	3.01011e-10
ENSG00000204054	LINC00963	2428.08	0.38633	1.85854e-11	3.05367e-10
ENSG00000170581	STAT2	1560.62	0.349298	1.88112e-11	3.08832e-10
ENSG00000103319	EEF2K	1775.69	-0.31673	1.90312e-11	3.12195e-10
ENSG00000124406	ATP8A1	220.847	0.94532	1.93786e-11	3.17643e-10
ENSG00000124215	CDH26	510.43	0.659492	1.94281e-11	3.18202e-10
ENSG00000113569	NUP155	5848.62	-0.47134	1.98057e-11	3.2413e-10
ENSG00000144580	CNOT9	3076.18	-0.302892	1.99316e-11	3.25933e-10
ENSG00000104524	PYCR3	1787.23	-0.529376	2.01748e-11	3.2965e-10
ENSG00000107566	ERLIN1	852.624	-0.469877	2.0367e-11	3.32265e-10
ENSG00000153982	GDPD1	250.141	0.782247	2.03639e-11	3.32265e-10
ENSG00000166340	TPP1	2283.51	0.349262	2.09632e-11	3.41722e-10
ENSG00000132142	NA	15508.9	-0.312139	2.11809e-11	3.44999e-10
ENSG00000111269	CREBL2	1810.94	0.417231	2.13373e-11	3.47273e-10
ENSG00000166444	ST5	430.771	0.649389	2.17357e-11	3.53478e-10
ENSG00000124784	RIOK1	613.701	-0.542837	2.17857e-11	3.54013e-10
ENSG00000163754	GYG1	1941.18	-0.354753	2.18514e-11	3.54803e-10
ENSG00000168924	LETM1	5119.08	-0.629863	2.20441e-11	3.5765e-10
ENSG00000174437	ATP2A2	14056.4	-0.251196	2.27589e-11	3.68958e-10
ENSG00000135454	B4GALNT1	433.406	0.641817	2.28676e-11	3.7043e-10
ENSG00000125944	HNRNPR	5339.8	-0.272838	2.32161e-11	3.7578e-10
ENSG00000121413	ZSCAN18	814.178	0.548347	2.34303e-11	3.78951e-10
ENSG00000151014	NOCT	450.132	-0.574695	2.35802e-11	3.81078e-10
ENSG00000142731	PLK4	885.593	-0.546008	2.40756e-11	3.88781e-10
ENSG00000171612	SLC25A33	2271.98	-0.409143	2.42484e-11	3.91265e-10
ENSG00000112039	FANCE	288.242	-0.684022	2.45854e-11	3.96395e-10
ENSG00000127152	BCL11B	46.5826	1.5192	2.4998e-11	4.02733e-10
ENSG00000100350	FOXRED2	5408.2	-0.304716	2.58264e-11	4.15432e-10
ENSG00000128791	TWSG1	943.013	0.461822	2.58241e-11	4.15432e-10
ENSG00000065526	SPEN	4593.41	-0.464097	2.61359e-11	4.20083e-10
ENSG00000166949	SMAD3	433.163	0.584234	2.66027e-11	4.27254e-10
ENSG00000111752	PHC1	350.073	0.62379	2.7679e-11	4.44195e-10
ENSG00000073146	MOV10L1	12.9441	2.9355	2.78371e-11	4.46386e-10
ENSG00000101236	RNF24	1433.33	0.351324	2.85147e-11	4.56898e-10
ENSG00000166946	CCNDBP1	655.445	0.493	2.96443e-11	4.7463e-10
ENSG00000109084	TMEM97	570.449	-0.647154	3.05689e-11	4.89055e-10
ENSG00000075914	EXOSC7	1313.36	-0.41572	3.10162e-11	4.95828e-10
ENSG00000149658	YTHDF1	2749.45	-0.26051	3.14948e-11	5.0309e-10
ENSG00000092853	CLSPN	1641.11	-1.21252	3.21742e-11	5.13545e-10
ENSG00000149150	SLC43A1	1752.23	-0.408477	3.26189e-11	5.20243e-10
ENSG00000119771	KLHL29	561.909	-0.553969	3.2671e-11	5.20673e-10
ENSG00000174132	FAM174A	456.104	0.585806	3.32288e-11	5.29154e-10
ENSG00000103995	CEP152	935.712	-0.510661	3.37048e-11	5.36321e-10
ENSG00000165733	BMS1	3344.98	-0.730415	3.49888e-11	5.56324e-10
ENSG00000122642	FKBP9	1170.59	0.378555	3.53468e-11	5.61586e-10
ENSG00000141522	ARHGDIA	9822	-0.442825	3.55969e-11	5.65125e-10
ENSG00000146776	ATXN7L1	579.26	0.553812	3.64146e-11	5.77663e-10
ENSG00000213462	ERV3-1	262.059	0.76741	3.85814e-11	6.11567e-10
ENSG00000116984	MTR	3151.93	-0.429652	3.89068e-11	6.16253e-10
ENSG00000122966	CIT	1917.5	-0.506839	3.89908e-11	6.1711e-10
ENSG00000118816	CCNI	15391.2	0.425592	4.11563e-11	6.50887e-10
ENSG00000128595	CALU	4802.53	-0.349058	4.11904e-11	6.50929e-10
ENSG00000115109	EPB41L5	1473.82	0.431154	4.36152e-11	6.8872e-10
ENSG00000140406	TLNRD1	493.172	-0.780691	4.42602e-11	6.98372e-10
ENSG00000175220	ARHGAP1	2861.76	-0.381767	4.47366e-11	7.05352e-10
ENSG00000111716	LDHB	8855.32	-0.33919	4.47986e-11	7.05662e-10
ENSG00000136052	SLC41A2	122.326	1.09254	4.48245e-11	7.05662e-10
ENSG00000130935	NOL11	2881.37	-0.470814	4.58317e-11	7.20969e-10
ENSG00000187244	BCAM	930.886	0.537381	4.60176e-11	7.23343e-10
ENSG00000070423	RNF126	1976.51	-0.48097	4.72611e-11	7.42326e-10
ENSG00000066322	ELOVL1	3398.44	-0.421875	4.7378e-11	7.43598e-10
ENSG00000174099	MSRB3	71.4402	1.28216	4.90855e-11	7.69813e-10
ENSG00000237945	LINC00649	175.377	0.73795	4.9885e-11	7.81759e-10
ENSG00000135829	DHX9	11355.6	-0.269045	5.08343e-11	7.96032e-10
ENSG00000198551	ZNF627	1116.54	0.385868	5.09787e-11	7.9769e-10
ENSG00000141401	IMPA2	1129.05	-0.413384	5.15929e-11	8.06689e-10
ENSG00000165816	VWA2	59.2471	1.66419	5.20924e-11	8.13884e-10
ENSG00000115946	PNO1	768.145	-0.469591	5.22158e-11	8.15197e-10
ENSG00000261455	LINC01003	193.962	0.835899	5.24755e-11	8.18633e-10
ENSG00000173456	RNF26	2992.74	-0.385881	5.39149e-11	8.40455e-10
ENSG00000100614	PPM1A	3356.31	-0.408279	5.44171e-11	8.47645e-10
ENSG00000026025	VIM	281.399	0.630709	5.49094e-11	8.5467e-10
ENSG00000116688	MFN2	7520.41	-0.397403	5.63887e-11	8.77035e-10
ENSG00000120896	SORBS3	789.161	0.562215	5.66901e-11	8.8106e-10
ENSG00000059804	SLC2A3	17.9438	-5.89265	5.69733e-11	8.84797e-10
ENSG00000072274	TFRC	23427.1	-0.405279	5.83817e-11	9.05989e-10
ENSG00000113460	BRIX1	1688.2	-0.593576	5.96526e-11	9.24698e-10
ENSG00000198363	ASPH	8183.73	0.253233	5.96767e-11	9.24698e-10
ENSG00000137872	SEMA6D	38.592	-1.79638	6.08188e-11	9.4169e-10
ENSG00000127527	EPS15L1	2395.44	-0.344984	6.08814e-11	9.41954e-10
ENSG00000198604	BAZ1A	3777.08	-0.374022	6.11002e-11	9.44632e-10
ENSG00000136270	TBRG4	3242.92	-0.373825	6.15058e-11	9.50194e-10
ENSG00000069020	MAST4	1429.24	0.388614	6.16752e-11	9.521e-10
ENSG00000160201	U2AF1	3213.83	-0.304607	6.22422e-11	9.60136e-10
ENSG00000198055	GRK6	1787.49	-0.510163	6.23535e-11	9.61136e-10
ENSG00000119689	DLST	4222.67	-0.302719	6.36871e-11	9.80961e-10
ENSG00000232599	AL008707.1	33.8149	-2.29171	6.39565e-11	9.84379e-10
ENSG00000146416	AIG1	1543.79	0.403701	6.50005e-11	9.99703e-10
ENSG00000146143	PRIM2	651.607	-0.604941	6.76065e-11	1.03901e-09
ENSG00000011376	LARS2	3270.58	-0.269179	6.83223e-11	1.04923e-09
ENSG00000115561	CHMP3	830.683	0.431225	6.90904e-11	1.06024e-09
ENSG00000161980	POLR3K	1390.33	-0.547105	7.0375e-11	1.07915e-09
ENSG00000131558	EXOC4	2183.5	0.328963	7.22675e-11	1.10735e-09
ENSG00000111540	RAB5B	1022.46	0.444515	7.3146e-11	1.11998e-09
ENSG00000176749	CDK5R1	520.542	-0.499872	7.32636e-11	1.12095e-09
ENSG00000144120	TMEM177	507.246	-0.497781	7.34949e-11	1.12366e-09
ENSG00000110880	CORO1C	1928.53	-0.273317	7.6752e-11	1.17259e-09
ENSG00000125124	BBS2	1387.23	0.383569	7.68156e-11	1.1727e-09
ENSG00000100526	CDKN3	1085.93	-0.447764	8.28106e-11	1.26329e-09
ENSG00000106789	CORO2A	2186.61	-0.328208	8.39429e-11	1.27962e-09
ENSG00000114767	RRP9	1318.87	-0.63873	8.47829e-11	1.29147e-09
ENSG00000205937	RNPS1	7856.66	-0.327217	8.49012e-11	1.29232e-09
ENSG00000011677	GABRA3	218.114	0.685598	8.5294e-11	1.29735e-09
ENSG00000079156	OSBPL6	282.959	0.630596	8.56321e-11	1.30153e-09
ENSG00000108448	TRIM16L	874.131	0.58445	8.72125e-11	1.32458e-09
ENSG00000105707	HPN	1952.33	0.473151	8.75053e-11	1.32805e-09
ENSG00000167553	TUBA1C	12821.8	-0.408236	8.77235e-11	1.33039e-09
ENSG00000094880	CDC23	1830.36	-0.346407	8.89956e-11	1.34869e-09
ENSG00000245146	MALINC1	715.696	0.626367	9.46277e-11	1.43299e-09
ENSG00000144118	RALB	1124.86	0.437675	9.47332e-11	1.43354e-09
ENSG00000145868	FBXO38	1966.29	-0.365186	9.48363e-11	1.43405e-09
ENSG00000131148	EMC8	998.45	-0.391743	9.50852e-11	1.43677e-09
ENSG00000189057	FAM111B	2442.61	-0.958681	9.58945e-11	1.44794e-09
ENSG00000231925	TAPBP	432.189	0.592997	9.75374e-11	1.47167e-09
ENSG00000197798	FAM118B	730.053	-0.401232	9.96483e-11	1.50242e-09
ENSG00000245694	CRNDE	349.473	0.812395	1.00549e-10	1.5149e-09
ENSG00000128872	TMOD2	455.454	0.60721	1.03706e-10	1.55987e-09
ENSG00000141543	EIF4A3	3459.33	-0.369028	1.03836e-10	1.55987e-09
ENSG00000171004	HS6ST2	181.002	0.833328	1.03818e-10	1.55987e-09
ENSG00000177426	TGIF1	847.03	0.36214	1.0379e-10	1.55987e-09
ENSG00000183579	ZNRF3	1151.55	-0.336578	1.03916e-10	1.55995e-09
ENSG00000142945	KIF2C	1889.73	-0.371646	1.04446e-10	1.56677e-09
ENSG00000232956	SNHG15	1222.2	-0.489559	1.06332e-10	1.5939e-09
ENSG00000125779	PANK2	1754.49	-0.319906	1.07528e-10	1.61066e-09
ENSG00000205542	TMSB4X	75.6731	1.31234	1.08477e-10	1.6237e-09
ENSG00000160298	C21orf58	920.718	-0.470839	1.10042e-10	1.64593e-09
ENSG00000115484	CCT4	6271.56	-0.286071	1.10835e-10	1.6566e-09
ENSG00000170899	GSTA4	281.578	0.713043	1.14239e-10	1.70624e-09
ENSG00000139194	RBP5	45.855	1.50249	1.1471e-10	1.71204e-09
ENSG00000130958	SLC35D2	354.339	0.609302	1.14978e-10	1.71481e-09
ENSG00000108375	RNF43	727.069	0.454267	1.16281e-10	1.73299e-09
ENSG00000150990	DHX37	1153.54	-0.768499	1.16704e-10	1.73684e-09
ENSG00000160179	ABCG1	466.497	0.600732	1.16707e-10	1.73684e-09
ENSG00000158161	EYA3	2407.4	-0.262136	1.181e-10	1.7563e-09
ENSG00000164867	NOS3	58.8632	1.51293	1.2045e-10	1.78996e-09
ENSG00000119900	OGFRL1	1388.14	0.584585	1.2279e-10	1.82343e-09
ENSG00000197635	DPP4	120.874	-0.979841	1.27789e-10	1.8963e-09
ENSG00000261770	AC006504.1	402.792	0.862567	1.31647e-10	1.95215e-09
ENSG00000176915	ANKLE2	2769.37	-0.261346	1.33436e-10	1.97725e-09
ENSG00000116120	FARSB	3785.58	-0.445842	1.34317e-10	1.98889e-09
ENSG00000081277	PKP1	33.5062	-2.46599	1.3649e-10	2.01963e-09
ENSG00000143819	EPHX1	9066.95	0.407659	1.3774e-10	2.03666e-09
ENSG00000163617	CCDC191	117.566	0.964958	1.38354e-10	2.04428e-09
ENSG00000133835	HSD17B4	5455.77	-0.287492	1.38846e-10	2.05008e-09
ENSG00000105792	CFAP69	815.207	0.776394	1.41118e-10	2.08215e-09
ENSG00000132275	RRP8	1243.92	-0.385606	1.43139e-10	2.11046e-09
ENSG00000158669	GPAT4	3202.45	-0.312049	1.45071e-10	2.13743e-09
ENSG00000103187	COTL1	1318.8	-0.446483	1.47592e-10	2.17147e-09
ENSG00000196510	ANAPC7	2038.37	-0.273078	1.47551e-10	2.17147e-09
ENSG00000090097	PCBP4	429.874	0.619476	1.48655e-10	2.18556e-09
ENSG00000075131	TIPIN	724.752	-0.533318	1.4948e-10	2.19613e-09
ENSG00000085872	CHERP	2916.98	-0.472292	1.50145e-10	2.20433e-09
ENSG00000164951	PDP1	413.296	0.622936	1.59593e-10	2.34138e-09
ENSG00000176571	CNBD1	113.06	1.40017	1.60577e-10	2.35414e-09
ENSG00000153574	RPIA	461.529	-0.534665	1.67763e-10	2.45775e-09
ENSG00000154328	NEIL2	1565.78	-0.382156	1.68991e-10	2.474e-09
ENSG00000236537	NA	209.608	0.775594	1.7137e-10	2.50704e-09
ENSG00000165915	SLC39A13	283.767	0.743309	1.75544e-10	2.56629e-09
ENSG00000145375	SPATA5	912.706	-0.416512	1.78381e-10	2.60592e-09
ENSG00000167088	SNRPD1	2749.64	-0.403346	1.80394e-10	2.63347e-09
ENSG00000156697	UTP14A	1692.14	-0.448455	1.8131e-10	2.64498e-09
ENSG00000141499	WRAP53	963.178	-0.561567	1.8167e-10	2.64837e-09
ENSG00000116455	WDR77	1131.85	-0.356851	1.8333e-10	2.67069e-09
ENSG00000068078	FGFR3	235.855	-0.919933	1.84123e-10	2.68005e-09
ENSG00000148300	REXO4	608.764	-0.659279	1.84232e-10	2.68005e-09
ENSG00000103356	EARS2	2548.18	-0.250035	1.91206e-10	2.77955e-09
ENSG00000100888	CHD8	6253.36	-0.24499	1.96392e-10	2.85292e-09
ENSG00000078369	GNB1	13133.1	0.173878	2.00235e-10	2.90672e-09
ENSG00000110002	VWA5A	99.4106	1.02394	2.05775e-10	2.98504e-09
ENSG00000162433	AK4	4222.12	-0.382049	2.06224e-10	2.98946e-09
ENSG00000110917	MLEC	12635.8	-0.224819	2.07412e-10	3.00457e-09
ENSG00000136448	NMT1	2136.23	-0.286941	2.0788e-10	3.00925e-09
ENSG00000112541	PDE10A	1092.73	0.51601	2.09764e-10	3.03438e-09
ENSG00000071073	MGAT4A	180.968	0.844565	2.12234e-10	3.06797e-09
ENSG00000088812	ATRN	3121.95	0.271133	2.15935e-10	3.11712e-09
ENSG00000111911	HINT3	751.825	0.555667	2.15902e-10	3.11712e-09
ENSG00000180806	HOXC9	182.066	0.768639	2.18183e-10	3.14737e-09
ENSG00000156050	FAM161B	182.956	0.740846	2.18379e-10	3.14801e-09
ENSG00000181722	ZBTB20	129.85	0.922692	2.19742e-10	3.16545e-09
ENSG00000198515	CNGA1	51.1382	1.39662	2.26922e-10	3.26661e-09
ENSG00000221829	FANCG	1304.72	-0.480348	2.30748e-10	3.31937e-09
ENSG00000174840	PDE12	2557.88	-0.312202	2.38282e-10	3.42536e-09
ENSG00000164124	TMEM144	647.352	0.553728	2.53241e-10	3.63788e-09
ENSG00000100162	CENPM	904.308	-0.539233	2.54581e-10	3.6546e-09
ENSG00000112343	TRIM38	535.961	0.539044	2.60477e-10	3.73663e-09
ENSG00000102287	GABRE	299.966	-0.643637	2.62007e-10	3.75598e-09
ENSG00000100401	RANGAP1	4350.76	-0.768621	2.67506e-10	3.83216e-09
ENSG00000089737	DDX24	7553.06	-0.321432	2.67926e-10	3.83551e-09
ENSG00000158079	PTPDC1	557.029	0.605014	2.70888e-10	3.87524e-09
ENSG00000099810	MTAP	1385.06	-0.480858	2.74526e-10	3.92456e-09
ENSG00000177479	ARIH2	3746.66	-0.238951	2.78131e-10	3.97335e-09
ENSG00000196781	TLE1	1655.67	0.400053	2.78702e-10	3.97877e-09
ENSG00000162889	MAPKAPK2	1039.5	0.391148	2.79326e-10	3.98492e-09
ENSG00000004864	SLC25A13	1497.19	-0.389911	2.9586e-10	4.21788e-09
ENSG00000175274	TP53I11	1531.5	0.436433	3.00486e-10	4.28089e-09
ENSG00000100271	TTLL1	385.295	0.617865	3.02185e-10	4.29972e-09
ENSG00000112414	ADGRG6	14339.4	0.44127	3.02223e-10	4.29972e-09
ENSG00000111247	RAD51AP1	708.362	-0.56363	3.04282e-10	4.32306e-09
ENSG00000137259	NA	1766.87	-0.673321	3.04139e-10	4.32306e-09
ENSG00000144730	IL17RD	325.602	0.564012	3.06828e-10	4.35624e-09
ENSG00000082701	GSK3B	4654.68	0.342904	3.10022e-10	4.39857e-09
ENSG00000132182	NUP210	7603.17	-0.309251	3.16013e-10	4.4805e-09
ENSG00000162458	FBLIM1	93.6196	0.98983	3.17222e-10	4.49456e-09
ENSG00000156931	VPS8	1759.54	0.434979	3.28935e-10	4.65732e-09
ENSG00000170348	TMED10	7746.75	0.3961	3.29667e-10	4.66449e-09
ENSG00000138180	CEP55	984.422	-0.453265	3.38178e-10	4.78165e-09
ENSG00000102054	RBBP7	3750.31	-0.261486	3.55679e-10	5.02566e-09
ENSG00000156502	SUPV3L1	1616.96	-0.305761	3.58674e-10	5.06452e-09
ENSG00000154917	RAB6B	692.067	0.477685	3.61544e-10	5.10157e-09
ENSG00000158296	SLC13A3	204.995	0.793741	3.62617e-10	5.11322e-09
ENSG00000108187	PBLD	276.473	0.595555	3.6481e-10	5.14064e-09
ENSG00000154914	USP43	732.843	-0.426135	3.66559e-10	5.16176e-09
ENSG00000164048	ZNF589	685.07	-0.552433	3.67075e-10	5.16553e-09
ENSG00000170312	CDK1	7085.85	-0.565478	3.81722e-10	5.36799e-09
ENSG00000139517	LNX2	1367.65	0.318603	4.14577e-10	5.82605e-09
ENSG00000160862	AZGP1	857.606	-0.592015	4.22007e-10	5.92644e-09
ENSG00000102409	BEX4	216.608	0.74836	4.27741e-10	6.00288e-09
ENSG00000138758	2011-09-01	7615.51	0.309204	4.34444e-10	6.09282e-09
ENSG00000125834	STK35	3704.09	-0.280014	4.35877e-10	6.10877e-09
ENSG00000118689	FOXO3	2888.41	0.382018	4.43618e-10	6.21306e-09
ENSG00000198237	AC131392.1	141.828	0.898817	4.54709e-10	6.36408e-09
ENSG00000106078	COBL	1727.49	0.353862	4.59317e-10	6.42423e-09
ENSG00000100354	TNRC6B	6932.02	0.353281	4.63215e-10	6.47437e-09
ENSG00000132471	WBP2	2928.15	0.387816	4.65193e-10	6.49763e-09
ENSG00000263235	AC006111.2	76.4674	-1.0757	4.70996e-10	6.57424e-09
ENSG00000136490	LIMD2	67.3147	1.29812	4.74151e-10	6.61381e-09
ENSG00000108651	UTP6	2139.96	-0.305027	4.756e-10	6.62955e-09
ENSG00000181264	TMEM136	668.452	0.499239	4.77718e-10	6.65459e-09
ENSG00000159128	IFNGR2	432.428	0.544073	4.81152e-10	6.69792e-09
ENSG00000245937	LINC01184	417.215	0.523384	5.03661e-10	7.00654e-09
ENSG00000133816	MICAL2	1832.17	-0.298823	5.09396e-10	7.08156e-09
ENSG00000196419	XRCC6	17604.3	-0.340858	5.28502e-10	7.34224e-09
ENSG00000139131	YARS2	991.401	-0.36005	5.35444e-10	7.43369e-09
ENSG00000185924	RTN4RL1	290.472	0.824808	5.36361e-10	7.44142e-09
ENSG00000125354	2006-09-01	701.7	0.419377	5.43757e-10	7.53899e-09
ENSG00000117016	RIMS3	146.357	0.836992	5.65371e-10	7.8334e-09
ENSG00000156983	BRPF1	1204.42	-0.447637	5.68219e-10	7.86758e-09
ENSG00000132326	PER2	1429.38	-0.363527	5.71062e-10	7.90167e-09
ENSG00000164109	MAD2L1	1300.69	-0.623715	5.764e-10	7.97019e-09
ENSG00000167861	HID1	3009.34	0.441755	5.77119e-10	7.97481e-09
ENSG00000164032	H2AFZ	11224.5	-0.334377	5.83096e-10	8.05201e-09
ENSG00000248429	FAM198B-AS1	352.735	0.631149	5.83996e-10	8.05907e-09
ENSG00000111110	PPM1H	2044.06	0.287572	5.85547e-10	8.07509e-09
ENSG00000175063	UBE2C	2408.96	-0.469035	5.90715e-10	8.14093e-09
ENSG00000077585	GPR137B	326.951	0.519233	6.11245e-10	8.41826e-09
ENSG00000064270	ATP2C2	729.867	0.74409	6.22073e-10	8.56168e-09
ENSG00000162415	ZSWIM5	106.634	0.944581	6.27571e-10	8.63161e-09
ENSG00000188021	UBQLN2	2946.74	0.243055	6.46503e-10	8.88608e-09
ENSG00000136527	TRA2B	6529.25	-0.372288	6.54211e-10	8.98606e-09
ENSG00000124762	CDKN1A	5298.46	0.387305	6.56515e-10	9.01172e-09
ENSG00000132153	DHX30	3349.13	-0.332497	6.5842e-10	9.03188e-09
ENSG00000008256	CYTH3	1933.15	0.283006	6.59245e-10	9.03238e-09
ENSG00000148335	NTMT1	1219.16	-0.608054	6.5933e-10	9.03238e-09
ENSG00000165861	ZFYVE1	498.583	0.444648	6.74941e-10	9.24012e-09
ENSG00000170836	PPM1D	834.344	-0.364986	6.78353e-10	9.2807e-09
ENSG00000163590	PPM1L	185.878	0.761882	6.80345e-10	9.3018e-09
ENSG00000184254	ALDH1A3	886.126	-0.416744	6.85699e-10	9.3688e-09
ENSG00000232859	LYRM9	85.1666	1.14956	6.9039e-10	9.42668e-09
ENSG00000035403	VCL	5688.35	-0.233752	6.98156e-10	9.52643e-09
ENSG00000083307	GRHL2	6272.88	-0.231631	7.28649e-10	9.93595e-09
ENSG00000100364	KIAA0930	3250.42	-0.416406	7.31865e-10	9.97322e-09
ENSG00000159055	MIS18A	544.022	-0.444733	7.36303e-10	1.00271e-08
ENSG00000106733	NMRK1	313.956	0.681611	7.51608e-10	1.02288e-08
ENSG00000164053	ATRIP	637.535	-0.49765	7.53215e-10	1.02439e-08
ENSG00000241935	HOGA1	206.766	0.761932	7.75683e-10	1.05426e-08
ENSG00000071537	SEL1L	3794.27	0.361736	7.92664e-10	1.07663e-08
ENSG00000156671	SAMD8	1176.6	0.480413	8.00682e-10	1.08681e-08
ENSG00000170727	NA	276.114	-1.12595	8.15144e-10	1.10571e-08
ENSG00000181163	NPM1	37994.3	-0.355983	8.24236e-10	1.11731e-08
ENSG00000186522	2010-09-01	500.428	0.474688	8.29442e-10	1.12363e-08
ENSG00000180488	MIGA1	1092.14	0.512307	8.43776e-10	1.1423e-08
ENSG00000174442	ZWILCH	1959.42	-0.579252	8.45321e-10	1.14364e-08
ENSG00000164081	TEX264	2307.05	-0.446492	8.53956e-10	1.15457e-08
ENSG00000167470	MIDN	4807.95	0.360506	8.55215e-10	1.15552e-08
ENSG00000163872	YEATS2	3394.81	-0.229384	8.65562e-10	1.16874e-08
ENSG00000141452	RMC1	1141.16	-0.352155	8.69945e-10	1.17389e-08
ENSG00000065060	UHRF1BP1	3429.84	0.259692	8.79394e-10	1.18586e-08
ENSG00000137502	RAB30	558.294	0.673599	8.9935e-10	1.21198e-08
ENSG00000118007	STAG1	1115.28	-0.414891	9.75336e-10	1.31353e-08
ENSG00000112812	PRSS16	95.1828	0.903562	9.80665e-10	1.31985e-08
ENSG00000096063	SRPK1	3264.44	-0.364704	9.8993e-10	1.33145e-08
ENSG00000105486	LIG1	794.393	-0.694219	9.91917e-10	1.33326e-08
ENSG00000103404	USP31	2203.31	-0.3153	1.00059e-09	1.34404e-08
ENSG00000158882	TOMM40L	1151.3	-0.442578	1.0077e-09	1.35271e-08
ENSG00000015171	ZMYND11	2440.57	0.327418	1.0322e-09	1.3847e-08
ENSG00000145293	ENOPH1	2350.45	-0.313929	1.10194e-09	1.47729e-08
ENSG00000153944	MSI2	3482.79	0.387327	1.12379e-09	1.50562e-08
ENSG00000228451	SDAD1P1	98.1929	1.03404	1.14599e-09	1.53436e-08
ENSG00000152926	ZNF117	127.514	1.40967	1.15851e-09	1.55013e-08
ENSG00000259319	AF111167.2	64.5948	1.14271	1.16389e-09	1.55632e-08
ENSG00000128578	STRIP2	411.206	-0.498218	1.22455e-09	1.63638e-08
ENSG00000003249	DBNDD1	1418.39	0.419171	1.2323e-09	1.64566e-08
ENSG00000102743	SLC25A15	776.254	-0.359469	1.26092e-09	1.6828e-08
ENSG00000184378	ACTRT3	96.3822	1.06252	1.26284e-09	1.68428e-08
ENSG00000162738	VANGL2	92.4956	0.937067	1.33468e-09	1.77894e-08
ENSG00000110171	TRIM3	581.142	-0.517254	1.34177e-09	1.78725e-08
ENSG00000119285	HEATR1	4353.47	-0.385823	1.3553e-09	1.8041e-08
ENSG00000134815	DHX34	726.713	-0.500643	1.36117e-09	1.81074e-08
ENSG00000141682	PMAIP1	342.408	0.562428	1.42775e-09	1.89809e-08
ENSG00000137822	TUBGCP4	981.366	-0.34053	1.43869e-09	1.91142e-08
ENSG00000085063	CD59	1519.35	0.356314	1.44748e-09	1.92076e-08
ENSG00000088538	DOCK3	200.281	0.655462	1.44758e-09	1.92076e-08
ENSG00000224411	HSP90AA2P	92.7138	-0.979412	1.46455e-09	1.94203e-08
ENSG00000185046	ANKS1B	222.974	0.734848	1.4986e-09	1.98591e-08
ENSG00000152377	SPOCK1	38.3677	-1.64795	1.51276e-09	2.00314e-08
ENSG00000164024	METAP1	1982.76	-0.381455	1.51354e-09	2.00314e-08
ENSG00000161996	WDR90	1863.23	-0.50069	1.52399e-09	2.01568e-08
ENSG00000204386	NEU1	308.842	0.660526	1.57339e-09	2.07969e-08
ENSG00000104472	CHRAC1	620.461	-0.450485	1.57653e-09	2.08251e-08
ENSG00000164362	TERT	84.792	-1.25045	1.58796e-09	2.09627e-08
ENSG00000184575	XPOT	10956.1	0.469024	1.59153e-09	2.09964e-08
ENSG00000135451	TROAP	1318.67	-0.530258	1.59956e-09	2.1089e-08
ENSG00000127585	FBXL16	817.608	0.497789	1.60663e-09	2.11687e-08
ENSG00000011638	TMEM159	532.249	0.452401	1.62864e-09	2.1445e-08
ENSG00000130699	TAF4	963.614	-0.399749	1.63225e-09	2.14789e-08
ENSG00000136367	ZFHX2	307.266	0.694447	1.64766e-09	2.16679e-08
ENSG00000162631	NTNG1	128.233	-0.956898	1.6503e-09	2.16887e-08
ENSG00000006282	SPATA20	3958.4	0.395497	1.67722e-09	2.20286e-08
ENSG00000175376	EIF1AD	1145.37	-0.377903	1.68844e-09	2.21618e-08
ENSG00000179115	FARSA	4720.58	-0.527888	1.69566e-09	2.22425e-08
ENSG00000186493	C5orf38	212.034	0.727903	1.69726e-09	2.22493e-08
ENSG00000152380	FAM151B	95.5867	-0.931359	1.73349e-09	2.27099e-08
ENSG00000123352	SPATS2	1641.44	0.281836	1.74439e-09	2.283e-08
ENSG00000158856	DMTN	736.318	0.546442	1.74486e-09	2.283e-08
ENSG00000121350	PYROXD1	295.942	0.691282	1.74976e-09	2.28796e-08
ENSG00000196177	ACADSB	2640.14	0.330653	1.78819e-09	2.33674e-08
ENSG00000164418	GRIK2	357.561	0.639817	1.80477e-09	2.35691e-08
ENSG00000114120	SLC25A36	2289.7	0.739865	1.85648e-09	2.42291e-08
ENSG00000166432	ZMAT1	33.8341	1.81712	1.95542e-09	2.55042e-08
ENSG00000147274	RBMX	8200.36	-0.281088	1.98438e-09	2.58657e-08
ENSG00000169762	TAPT1	961.19	0.51328	2.07021e-09	2.69675e-08
ENSG00000165527	ARF6	2910.86	-0.429586	2.1045e-09	2.73969e-08
ENSG00000135108	FBXO21	2354.53	-0.228118	2.13523e-09	2.77794e-08
ENSG00000111412	C12orf49	1185.55	0.384001	2.15563e-09	2.80272e-08
ENSG00000181472	ZBTB2	465.334	-0.52747	2.20258e-09	2.86197e-08
ENSG00000197746	PSAP	16263.1	0.304681	2.22706e-09	2.89196e-08
ENSG00000100034	PPM1F	850.286	-0.619224	2.23925e-09	2.90597e-08
ENSG00000198729	PPP1R14C	411.027	0.487293	2.28817e-09	2.96759e-08
ENSG00000145050	MANF	1450.74	-0.451809	2.29442e-09	2.97384e-08
ENSG00000197989	SNHG12	1797.19	-0.436698	2.29917e-09	2.97812e-08
ENSG00000175792	RUVBL1	4525.05	-0.37159	2.32018e-09	3.00346e-08
ENSG00000164815	ORC5	1167.51	-0.665852	2.33064e-09	3.0151e-08
ENSG00000135776	ABCB10	694.871	-0.351867	2.34458e-09	3.03125e-08
ENSG00000115548	KDM3A	1136.5	0.348812	2.35725e-09	3.04573e-08
ENSG00000145685	LHFPL2	220.998	0.648261	2.37248e-09	3.06349e-08
ENSG00000196352	CD55	42.0526	1.60952	2.38617e-09	3.07924e-08
ENSG00000213699	SLC35F6	1748.71	0.274112	2.41732e-09	3.1175e-08
ENSG00000117479	SLC19A2	1615.66	-0.42708	2.44888e-09	3.15623e-08
ENSG00000107951	MTPAP	1708.47	-0.344432	2.46264e-09	3.17199e-08
ENSG00000143157	POGK	3821.43	-0.255104	2.49207e-09	3.2079e-08
ENSG00000068615	REEP1	78.8039	1.0213	2.52046e-09	3.24242e-08
ENSG00000005249	PRKAR2B	773.284	0.458326	2.59073e-09	3.33076e-08
ENSG00000198125	MB	1088.99	0.462632	2.67772e-09	3.44045e-08
ENSG00000137656	BUD13	976.913	-0.406393	2.6835e-09	3.44574e-08
ENSG00000159082	SYNJ1	763.102	-0.569129	2.6947e-09	3.45798e-08
ENSG00000165501	LRR1	677.623	-0.618272	2.70503e-09	3.46908e-08
ENSG00000187735	TCEA1	2833.17	0.427164	2.74074e-09	3.5127e-08
ENSG00000132661	NXT1	490.104	-0.61809	2.77444e-09	3.55369e-08
ENSG00000139220	PPFIA2	6526.67	0.377876	2.77942e-09	3.55786e-08
ENSG00000166881	NEMP1	1812.95	-0.406252	2.81769e-09	3.60463e-08
ENSG00000113161	HMGCR	3845.12	-0.345177	2.83066e-09	3.61898e-08
ENSG00000180891	CUEDC1	395.112	0.593774	2.90522e-09	3.71201e-08
ENSG00000090861	AARS	13982.4	0.514213	2.94404e-09	3.75928e-08
ENSG00000140451	PIF1	331.032	-0.570809	3.19992e-09	4.0835e-08
ENSG00000072042	RDH11	7056.15	0.257551	3.26367e-09	4.16228e-08
ENSG00000042980	ADAM28	15.8165	-2.41008	3.27179e-09	4.16813e-08
ENSG00000125347	IRF1	120.606	0.962759	3.27228e-09	4.16813e-08
ENSG00000090238	YPEL3	225.601	0.736995	3.31431e-09	4.21907e-08
ENSG00000049656	CLPTM1L	4200.78	-0.336155	3.33242e-09	4.2369e-08
ENSG00000118900	UBN1	3097.12	-0.377358	3.33065e-09	4.2369e-08
ENSG00000122042	UBL3	717.186	0.366444	3.37486e-09	4.28823e-08
ENSG00000132879	FBXO44	545.04	0.571417	3.43904e-09	4.36709e-08
ENSG00000104889	RNASEH2A	2157.67	-0.535925	3.46298e-09	4.3948e-08
ENSG00000150361	KLHL1	1138.31	0.620907	3.48589e-09	4.42115e-08
ENSG00000130826	DKC1	2617.85	-0.675494	3.49341e-09	4.42799e-08
ENSG00000167995	BEST1	293.137	1.11902	3.52828e-09	4.46944e-08
ENSG00000125826	RBCK1	3289.37	0.454441	3.53608e-09	4.47659e-08
ENSG00000168672	FAM84B	3204.87	0.269628	3.54861e-09	4.48969e-08
ENSG00000108829	LRRC59	5314.17	-0.514353	3.60301e-09	4.55574e-08
ENSG00000162302	RPS6KA4	1113.67	-0.667999	3.70902e-09	4.68692e-08
ENSG00000101945	SUV39H1	182.368	-0.719192	3.74309e-09	4.72708e-08
ENSG00000176148	TCP11L1	453.873	0.477525	3.7476e-09	4.72989e-08
ENSG00000171490	RSL1D1	7983.36	-0.277644	4.04597e-09	5.10336e-08
ENSG00000112394	SLC16A10	316.885	-0.583301	4.06724e-09	5.12705e-08
ENSG00000149577	SIDT2	1655.94	0.338738	4.08607e-09	5.14765e-08
ENSG00000079215	SLC1A3	200.84	-0.64066	4.23203e-09	5.32829e-08
ENSG00000215193	PEX26	3224.69	-0.290692	4.23503e-09	5.32882e-08
ENSG00000182944	EWSR1	10943.9	-0.293053	4.2682e-09	5.36729e-08
ENSG00000137571	SLCO5A1	658.626	0.454986	4.27447e-09	5.37191e-08
ENSG00000143502	SUSD4	168.067	0.801862	4.33803e-09	5.44848e-08
ENSG00000136271	DDX56	2939.49	-0.382874	4.39783e-09	5.51732e-08
ENSG00000136280	CCM2	1229.83	-0.404395	4.39818e-09	5.51732e-08
ENSG00000070778	PTPN21	774.608	-0.40838	4.44342e-09	5.56953e-08
ENSG00000120705	ETF1	6640.97	-0.25195	4.44518e-09	5.56953e-08
ENSG00000138286	FAM149B1	723.722	0.447008	4.48755e-09	5.61922e-08
ENSG00000145414	NAF1	616.195	-0.45804	4.58439e-09	5.73701e-08
ENSG00000130449	ZSWIM6	412.768	0.535019	4.5963e-09	5.74843e-08
ENSG00000173273	TNKS	2472.41	0.331848	4.64552e-09	5.80648e-08
ENSG00000138587	MNS1	252.61	-1.03029	4.66895e-09	5.83225e-08
ENSG00000171792	RHNO1	1514.53	-0.338476	4.78063e-09	5.96814e-08
ENSG00000079335	CDC14A	398.033	0.524943	4.84111e-09	6.04e-08
ENSG00000130821	SLC6A8	2796.56	-0.2941	4.86367e-09	6.06448e-08
ENSG00000215158	AC138409.2	545.114	0.674086	4.8685e-09	6.06685e-08
ENSG00000116675	DNAJC6	101.205	1.07528	4.91649e-09	6.12297e-08
ENSG00000168872	DDX19A	1457.68	-0.401382	4.95853e-09	6.17161e-08
ENSG00000117151	CTBS	726.509	0.654776	4.98307e-09	6.19842e-08
ENSG00000130764	LRRC47	2482.29	-0.421043	5.12295e-09	6.36859e-08
ENSG00000133895	MEN1	1421.73	-0.406337	5.13045e-09	6.37408e-08
ENSG00000145365	TIFA	238.27	-0.629418	5.17724e-09	6.42835e-08
ENSG00000130726	TRIM28	15816.1	-0.418068	5.2184e-09	6.47558e-08
ENSG00000267750	RUNDC3A-AS1	247.212	0.6416	5.27275e-09	6.53909e-08
ENSG00000196968	FUT11	623.7	-0.461094	5.28243e-09	6.54717e-08
ENSG00000243701	DUBR	380.649	-0.578762	5.35087e-09	6.62803e-08
ENSG00000168264	IRF2BP2	1873.4	0.336238	5.41354e-09	6.70165e-08
ENSG00000114650	SCAP	2972.25	-0.357594	5.56015e-09	6.87543e-08
ENSG00000141198	TOM1L1	1768.53	0.319141	5.56057e-09	6.87543e-08
ENSG00000215271	HOMEZ	782.4	0.405145	5.57434e-09	6.88834e-08
ENSG00000197275	RAD54B	231.425	-0.659973	5.64543e-09	6.97202e-08
ENSG00000127191	TRAF2	768.677	-0.645302	5.74572e-09	7.09165e-08
ENSG00000142677	IL22RA1	17.655	-3.07986	5.83761e-09	7.20076e-08
ENSG00000153048	CARHSP1	1307.77	-0.299492	5.86235e-09	7.22697e-08
ENSG00000134222	PSRC1	840.485	-0.471289	5.96918e-09	7.35429e-08
ENSG00000132600	PRMT7	1313.52	-0.3271	5.98827e-09	7.37341e-08
ENSG00000183580	FBXL7	70.3119	1.06081	6.04425e-09	7.43791e-08
ENSG00000112578	BYSL	1035.02	-0.502722	6.05943e-09	7.45216e-08
ENSG00000145416	2001-03-01	71.2178	1.13245	6.13636e-09	7.54229e-08
ENSG00000179715	PCED1B	35.7826	1.65373	6.19555e-09	7.61052e-08
ENSG00000205060	SLC35B4	2329.07	-0.354652	6.20108e-09	7.61279e-08
ENSG00000164074	ABHD18	530.668	0.653025	6.31438e-09	7.74729e-08
ENSG00000119227	PIGZ	54.7809	1.37247	6.49073e-09	7.95894e-08
ENSG00000111371	SLC38A1	9386.77	0.38528	6.64074e-09	8.13805e-08
ENSG00000171302	CANT1	5410.24	-0.270727	6.8427e-09	8.38058e-08
ENSG00000185104	FAF1	2661.03	-0.256192	6.97064e-09	8.53222e-08
ENSG00000140577	CRTC3	975.104	0.349056	6.99762e-09	8.56019e-08
ENSG00000139178	C1RL	1231.38	0.386577	7.05086e-09	8.62021e-08
ENSG00000159182	PRAC1	2346.83	0.6935	7.16008e-09	8.74857e-08
ENSG00000197024	ZNF398	1442.83	-0.300762	7.18006e-09	8.76781e-08
ENSG00000130119	GNL3L	2169.35	-0.273527	7.3429e-09	8.96137e-08
ENSG00000242407	AC091179.1	196.076	0.644364	7.36735e-09	8.9859e-08
ENSG00000185298	CCDC137	1656.8	-0.775973	7.53627e-09	9.18652e-08
ENSG00000159166	LAD1	5250.87	-0.771505	7.67942e-09	9.35551e-08
ENSG00000141956	PRDM15	895.245	-0.453721	7.7017e-09	9.37712e-08
ENSG00000153107	ANAPC1	2491.31	-0.368807	7.73366e-09	9.4105e-08
ENSG00000198162	MAN1A2	2569.65	0.251869	7.85954e-09	9.55805e-08
ENSG00000132155	RAF1	4344.48	-0.255593	7.86917e-09	9.56086e-08
ENSG00000165548	TMEM63C	656.993	0.474999	7.8711e-09	9.56086e-08
ENSG00000106460	TMEM106B	672.02	0.80636	7.97647e-09	9.68318e-08
ENSG00000204387	C6orf48	1215.41	0.463956	8.00295e-09	9.70961e-08
ENSG00000119042	SATB2	222.741	0.685474	8.05511e-09	9.76225e-08
ENSG00000155961	RAB39B	36.0076	1.4292	8.05577e-09	9.76225e-08
ENSG00000171421	MRPL36	1303.45	-0.553012	8.14642e-09	9.86632e-08
ENSG00000272325	NUDT3	3335.15	0.232643	8.19757e-09	9.92246e-08
ENSG00000111913	RIPOR2	167.919	-0.72928	8.27662e-09	1.00123e-07
ENSG00000246548	LINC02288	18.0641	2.07677	8.41635e-09	1.01754e-07
ENSG00000157895	C12orf43	989.212	-0.379301	8.46472e-09	1.02279e-07
ENSG00000123636	BAZ2B	777.446	0.626106	8.58399e-09	1.03659e-07
ENSG00000138759	FRAS1	206.065	0.716338	8.60854e-09	1.03895e-07
ENSG00000175198	PCCA	804.574	0.397978	8.72583e-09	1.05249e-07
ENSG00000107731	UNC5B	102.782	1.03832	8.82069e-09	1.06332e-07
ENSG00000006715	VPS41	1356.39	0.388908	8.95659e-09	1.07907e-07
ENSG00000066185	ZMYND12	125.855	0.850241	9.02111e-09	1.08621e-07
ENSG00000079313	REXO1	1247.13	-0.503231	9.05023e-09	1.08908e-07
ENSG00000165449	SLC16A9	363.209	0.642055	9.21314e-09	1.10804e-07
ENSG00000140521	POLG	1707.25	-0.59993	9.33237e-09	1.12173e-07
ENSG00000186063	AIDA	3136.66	0.63175	9.34189e-09	1.12222e-07
ENSG00000165591	FAAH2	222.924	0.66225	9.42967e-09	1.13211e-07
ENSG00000103126	AXIN1	1210.5	-0.544703	9.43757e-09	1.1324e-07
ENSG00000141569	TRIM65	1106.8	-0.357983	9.45841e-09	1.13424e-07
ENSG00000138078	PREPL	2163.79	0.448365	9.48594e-09	1.13623e-07
ENSG00000166272	WBP1L	1496.64	0.273474	9.48164e-09	1.13623e-07
ENSG00000129946	SHC2	58.4769	1.21828	9.62114e-09	1.15175e-07
ENSG00000241288	AC092902.2	130.005	1.10525	9.70807e-09	1.16149e-07
ENSG00000068305	MEF2A	1166.72	0.416589	9.79186e-09	1.17083e-07
ENSG00000101146	RAE1	1443.43	-0.348688	9.87776e-09	1.18042e-07
ENSG00000127080	IPPK	946.425	-0.313039	1.00825e-08	1.20419e-07
ENSG00000167315	ACAA2	197.404	0.613913	1.02458e-08	1.223e-07
ENSG00000167419	LPO	11.4946	2.73408	1.03069e-08	1.22957e-07
ENSG00000104147	OIP5	519.347	-0.524755	1.03876e-08	1.23848e-07
ENSG00000165699	TSC1	1895.52	0.265176	1.04551e-08	1.24581e-07
ENSG00000112851	ERBIN	3842.97	0.54159	1.05303e-08	1.25405e-07
ENSG00000166575	TMEM135	861.025	0.631339	1.05764e-08	1.25882e-07
ENSG00000163629	PTPN13	4028.79	0.313369	1.06128e-08	1.26242e-07
ENSG00000129007	CALML4	371.086	-0.683972	1.08296e-08	1.28748e-07
ENSG00000251136	AF117829.1	221.741	0.72108	1.09126e-08	1.2966e-07
ENSG00000162694	EXTL2	500.53	-0.620062	1.09851e-08	1.30447e-07
ENSG00000148450	MSRB2	695.276	0.533942	1.10359e-08	1.30975e-07
ENSG00000113645	WWC1	2480.28	-0.972844	1.10498e-08	1.31065e-07
ENSG00000104325	DECR1	585.156	0.425211	1.13147e-08	1.3413e-07
ENSG00000167258	CDK12	5633.93	-0.194265	1.14409e-08	1.35547e-07
ENSG00000122512	PMS2	1643.71	0.301283	1.15212e-08	1.36421e-07
ENSG00000039068	CDH1	17620.7	0.223337	1.16021e-08	1.373e-07
ENSG00000249115	HAUS5	1015.1	-0.522321	1.21721e-08	1.43963e-07
ENSG00000169718	DUS1L	3103.09	-0.525463	1.22515e-08	1.4482e-07
ENSG00000267698	AC002116.2	64.0287	-1.21678	1.23089e-08	1.45415e-07
ENSG00000164199	ADGRV1	3291.2	0.510053	1.24504e-08	1.47003e-07
ENSG00000269990	NA	322.322	0.527655	1.24682e-08	1.47128e-07
ENSG00000111674	ENO2	238.099	0.754139	1.24801e-08	1.47186e-07
ENSG00000132773	TOE1	700.4	-0.465762	1.24986e-08	1.4732e-07
ENSG00000115904	SOS1	675.286	0.491467	1.25692e-08	1.48068e-07
ENSG00000177192	PUS1	737.192	-0.897835	1.26086e-08	1.48447e-07
ENSG00000134490	TMEM241	1609.04	-0.322704	1.26441e-08	1.4878e-07
ENSG00000117280	RAB29	1277.91	-0.278882	1.2822e-08	1.50788e-07
ENSG00000087448	KLHL42	2104.53	0.32256	1.28364e-08	1.50872e-07
ENSG00000018408	WWTR1	53.3728	-1.32113	1.30467e-08	1.53256e-07
ENSG00000138031	ADCY3	812.54	-0.417179	1.3076e-08	1.53513e-07
ENSG00000152518	ZFP36L2	827.801	-0.401512	1.31042e-08	1.53757e-07
ENSG00000101367	MAPRE1	3800.6	-0.270574	1.31703e-08	1.54445e-07
ENSG00000116260	QSOX1	5953.49	0.355189	1.39333e-08	1.633e-07
ENSG00000188089	PLA2G4E	10.7154	-3.85871	1.4038e-08	1.64434e-07
ENSG00000154305	MIA3	7529.84	0.243299	1.41472e-08	1.65525e-07
ENSG00000154319	FAM167A	18.263	2.41499	1.41394e-08	1.65525e-07
ENSG00000168274	NA	3138.15	-0.524015	1.44622e-08	1.69116e-07
ENSG00000128881	TTBK2	838.92	0.446404	1.45646e-08	1.70216e-07
ENSG00000112144	ICK	1753.76	0.318521	1.45957e-08	1.70484e-07
ENSG00000145191	EIF2B5	3135.87	-0.24655	1.46799e-08	1.71371e-07
ENSG00000164916	FOXK1	4427.97	-0.470737	1.47248e-08	1.71797e-07
ENSG00000122507	BBS9	341.841	0.558908	1.49952e-08	1.74854e-07
ENSG00000091127	PUS7	1551.02	-0.32825	1.51499e-08	1.76559e-07
ENSG00000230847	OCLNP1	78.0614	1.2391	1.52913e-08	1.78106e-07
ENSG00000233369	GTF2IP4	147.543	0.683622	1.53881e-08	1.79132e-07
ENSG00000117724	CENPF	6875.18	-0.441494	1.54976e-08	1.80306e-07
ENSG00000093183	SEC22C	2580.17	-0.252451	1.56218e-08	1.81649e-07
ENSG00000152601	MBNL1	3280.12	-0.372446	1.59509e-08	1.85371e-07
ENSG00000175595	ERCC4	1053.91	0.360372	1.60769e-08	1.86731e-07
ENSG00000105220	GPI	15605.5	-0.280323	1.61157e-08	1.87076e-07
ENSG00000115290	GRB14	149.181	0.653762	1.63894e-08	1.90147e-07
ENSG00000196372	ASB13	761.049	-0.356443	1.64941e-08	1.91253e-07
ENSG00000205250	E2F4	1999.88	-0.376224	1.65241e-08	1.91495e-07
ENSG00000101098	RIMS4	130.876	0.840451	1.67562e-08	1.94075e-07
ENSG00000114867	EIF4G1	36804.7	-0.554977	1.69949e-08	1.96717e-07
ENSG00000185432	METTL7A	1895.28	-0.315777	1.70033e-08	1.96717e-07
ENSG00000099995	SF3A1	6964.6	-0.320407	1.72862e-08	1.99878e-07
ENSG00000086102	NFX1	3414.69	-0.194488	1.74575e-08	2.01747e-07
ENSG00000106397	PLOD3	1227.57	-0.420836	1.79394e-08	2.07084e-07
ENSG00000114251	WNT5A	136.663	0.826809	1.79365e-08	2.07084e-07
ENSG00000162073	PAQR4	982.52	-0.479466	1.81769e-08	2.09708e-07
ENSG00000139343	SNRPF	1962.63	-0.351329	1.85364e-08	2.13737e-07
ENSG00000130363	RSPH3	235.419	0.618621	1.87077e-08	2.15592e-07
ENSG00000041802	LSG1	3484.28	-0.235414	1.88533e-08	2.17149e-07
ENSG00000116922	C1orf109	1427.48	-0.321236	1.88892e-08	2.17441e-07
ENSG00000088854	C20orf194	258.523	0.610415	1.90041e-08	2.18642e-07
ENSG00000125977	EIF2S2	6028.36	0.262765	1.9137e-08	2.20049e-07
ENSG00000158042	MRPL17	2652.39	-0.530088	1.924e-08	2.21111e-07
ENSG00000171435	KSR2	897.96	0.501427	1.94374e-08	2.23255e-07
ENSG00000129696	TTI2	948.255	-0.355321	1.94682e-08	2.23485e-07
ENSG00000147475	ERLIN2	3796.34	0.215739	1.95345e-08	2.24121e-07
ENSG00000116117	PARD3B	544.772	0.434794	1.96223e-08	2.25004e-07
ENSG00000153233	PTPRR	35.5125	1.66911	1.98393e-08	2.27366e-07
ENSG00000187990	NA	4726.11	-0.523479	1.99429e-08	2.28427e-07
ENSG00000186458	DEFB132	117.367	-0.818618	2.02226e-08	2.31502e-07
ENSG00000187514	PTMA	31781.1	-0.321507	2.03575e-08	2.32918e-07
ENSG00000131711	MAP1B	38177	-0.496591	2.08289e-08	2.38128e-07
ENSG00000160602	NEK8	305.419	0.620193	2.08359e-08	2.38128e-07
ENSG00000158528	PPP1R9A	649.713	0.459617	2.10988e-08	2.40867e-07
ENSG00000178878	APOLD1	136.325	0.740822	2.10967e-08	2.40867e-07
ENSG00000166033	HTRA1	83.1413	0.974913	2.11349e-08	2.41032e-07
ENSG00000172992	DCAKD	1033.24	0.325525	2.11404e-08	2.41032e-07
ENSG00000185813	PCYT2	1800.2	-0.56654	2.11483e-08	2.41032e-07
ENSG00000154447	SH3RF1	3622.17	-0.26373	2.14393e-08	2.44215e-07
ENSG00000157077	ZFYVE9	1233.89	0.341031	2.1539e-08	2.45215e-07
ENSG00000172086	KRCC1	263.666	0.552257	2.17699e-08	2.47707e-07
ENSG00000162819	BROX	2593.76	0.475545	2.18811e-08	2.48836e-07
ENSG00000100422	CERK	43.8707	1.54635	2.19383e-08	2.4935e-07
ENSG00000132361	CLUH	6659.35	-0.615466	2.19648e-08	2.49514e-07
ENSG00000158467	AHCYL2	796.151	0.333711	2.22399e-08	2.52362e-07
ENSG00000170500	LONRF2	451.624	0.583961	2.22386e-08	2.52362e-07
ENSG00000181458	TMEM45A	50.4691	1.18683	2.22597e-08	2.52447e-07
ENSG00000144366	GULP1	3103.56	0.380564	2.26648e-08	2.569e-07
ENSG00000127472	PLA2G5	30.1485	-1.65524	2.27061e-08	2.57125e-07
ENSG00000135966	TGFBRAP1	1106.46	-0.279599	2.27095e-08	2.57125e-07
ENSG00000009335	UBE3C	7087.72	-0.208325	2.2862e-08	2.5871e-07
ENSG00000105926	MPP6	1110.9	-0.503895	2.28912e-08	2.58782e-07
ENSG00000171522	PTGER4	75.1184	-1.40878	2.28933e-08	2.58782e-07
ENSG00000071127	WDR1	7298.96	-0.321638	2.29706e-08	2.59472e-07
ENSG00000212864	RNF208	405.769	0.61084	2.29795e-08	2.59472e-07
ENSG00000127838	PNKD	1797.29	-0.379993	2.30193e-08	2.59662e-07
ENSG00000166347	CYB5A	4352.58	-0.400828	2.30251e-08	2.59662e-07
ENSG00000228903	RASA4CP	80.1738	0.964639	2.30339e-08	2.59662e-07
ENSG00000085982	USP40	2113.5	0.294005	2.31602e-08	2.60943e-07
ENSG00000162929	KIAA1841	239.55	0.648709	2.3591e-08	2.65652e-07
ENSG00000139445	FOXN4	30.4529	1.77588	2.40124e-08	2.70251e-07
ENSG00000150676	CCDC83	45.2708	1.29248	2.41664e-08	2.71835e-07
ENSG00000065518	NDUFB4	13589.9	0.411788	2.47169e-08	2.77877e-07
ENSG00000064309	CDON	637.056	0.415295	2.48725e-08	2.79474e-07
ENSG00000085274	MYNN	1475.08	0.547663	2.52447e-08	2.83502e-07
ENSG00000174013	FBXO45	1793.14	-0.422002	2.5274e-08	2.83678e-07
ENSG00000165678	GHITM	6796.62	0.34373	2.53142e-08	2.83974e-07
ENSG00000143793	C1orf35	639.592	-0.680185	2.55192e-08	2.86119e-07
ENSG00000111670	GNPTAB	2984.35	0.346556	2.5766e-08	2.8873e-07
ENSG00000168769	TET2	2087.82	0.362818	2.58727e-08	2.89768e-07
ENSG00000073803	MAP3K13	1965.6	0.36234	2.58928e-08	2.89837e-07
ENSG00000125484	GTF3C4	2238.58	-0.34743	2.63462e-08	2.94752e-07
ENSG00000130518	IQCN	416.239	0.606837	2.67122e-08	2.98686e-07
ENSG00000170759	KIF5B	10628.3	0.353912	2.68376e-08	2.99925e-07
ENSG00000100726	TELO2	1015.67	-0.753663	2.7017e-08	3.01768e-07
ENSG00000111737	RAB35	2085.62	-0.363312	2.72559e-08	3.04271e-07
ENSG00000158769	F11R	1996.37	0.292373	2.76037e-08	3.07988e-07
ENSG00000178187	ZNF454	288.256	0.583018	2.76505e-08	3.08344e-07
ENSG00000159176	CSRP1	4815.53	0.357009	2.76763e-08	3.08466e-07
ENSG00000000457	SCYL3	428.73	0.46026	2.7936e-08	3.11192e-07
ENSG00000143889	HNRNPLL	1101.66	0.350732	2.81964e-08	3.13924e-07
ENSG00000040275	SPDL1	1132.7	-0.478446	2.83445e-08	3.15403e-07
ENSG00000086730	LAT2	20.3202	-2.22801	2.84481e-08	3.16386e-07
ENSG00000148143	ZNF462	3226.12	0.322202	2.88854e-08	3.21077e-07
ENSG00000214826	DDX12P	351.339	-0.825039	2.89277e-08	3.21374e-07
ENSG00000112218	GPR63	484.629	0.457076	2.90378e-08	3.22424e-07
ENSG00000140374	ETFA	5626.76	0.249312	2.94287e-08	3.26589e-07
ENSG00000184445	KNTC1	3063.28	-0.528988	2.95768e-08	3.28057e-07
ENSG00000188483	IER5L	193.436	0.900925	2.96585e-08	3.28787e-07
ENSG00000112576	CCND3	1370.62	-0.399577	2.97508e-08	3.29634e-07
ENSG00000171960	PPIH	1085.24	-0.437168	3.00707e-08	3.32999e-07
ENSG00000239521	CASTOR3	165.438	0.708297	3.04734e-08	3.37278e-07
ENSG00000128266	GNAZ	960.937	0.389538	3.08433e-08	3.4119e-07
ENSG00000143437	ARNT	2185.59	0.249646	3.11381e-08	3.44267e-07
ENSG00000136026	CKAP4	4654.2	-0.257447	3.11722e-08	3.4446e-07
ENSG00000175115	PACS1	1870.47	-0.399798	3.14662e-08	3.47523e-07
ENSG00000113621	TXNDC15	1456.76	0.369855	3.17015e-08	3.49935e-07
ENSG00000166226	CCT2	9912.25	-0.290293	3.18867e-08	3.51791e-07
ENSG00000197461	PDGFA	233.517	0.644381	3.19151e-08	3.51916e-07
ENSG00000160613	PCSK7	1776.85	-0.419997	3.20245e-08	3.52935e-07
ENSG00000107779	BMPR1A	1072.04	-0.328081	3.28729e-08	3.62092e-07
ENSG00000173611	SCAI	628.739	0.579044	3.30947e-08	3.64341e-07
ENSG00000144554	FANCD2	2715.32	-0.295399	3.31598e-08	3.64864e-07
ENSG00000107862	GBF1	6434.08	-0.28245	3.39715e-08	3.73596e-07
ENSG00000006756	ARSD	1176.21	0.342944	3.41509e-08	3.75369e-07
ENSG00000167114	SLC27A4	1367.65	-0.516924	3.48176e-08	3.82494e-07
ENSG00000080839	RBL1	1149.32	-0.457704	3.5054e-08	3.84887e-07
ENSG00000092377	TBL1Y	84.3792	0.935225	3.5293e-08	3.87305e-07
ENSG00000182606	TRAK1	2150.31	-0.254043	3.63355e-08	3.98535e-07
ENSG00000144724	PTPRG	1184.01	0.397112	3.64072e-08	3.99109e-07
ENSG00000131828	PDHA1	2597.21	-0.251008	3.67324e-08	4.0243e-07
ENSG00000139438	FAM222A	362.177	-0.508809	3.67491e-08	4.0243e-07
ENSG00000183751	TBL3	1521.19	-0.533152	3.69355e-08	4.04258e-07
ENSG00000073008	PVR	1364.45	-0.394214	3.74431e-08	4.09597e-07
ENSG00000141030	COPS3	3304.91	-0.362423	3.76252e-08	4.11372e-07
ENSG00000166828	SCNN1G	32.0919	1.4351	3.79063e-08	4.14225e-07
ENSG00000180398	MCFD2	2168.79	0.308867	3.81125e-08	4.1626e-07
ENSG00000215251	FASTKD5	1520.2	-0.302563	3.84016e-08	4.19196e-07
ENSG00000163328	GPR155	201.918	0.768688	3.84421e-08	4.19416e-07
ENSG00000161956	SENP3	697.609	-0.502957	3.92873e-08	4.28412e-07
ENSG00000221926	TRIM16	881.007	0.331931	3.94153e-08	4.29582e-07
ENSG00000170291	ELP5	1551.13	-0.37608	3.97574e-08	4.33081e-07
ENSG00000185305	ARL15	179.289	0.71915	3.99823e-08	4.35302e-07
ENSG00000231007	CDC20P1	132.854	-0.797163	4.03762e-08	4.3936e-07
ENSG00000237413	MGC27382	16.4405	-2.46427	4.04231e-08	4.39639e-07
ENSG00000136159	NUDT15	853.459	-0.439631	4.08218e-08	4.43741e-07
ENSG00000163781	TOPBP1	2766.76	-0.360597	4.21214e-08	4.57627e-07
ENSG00000152086	TUBA3E	12.9163	-3.06834	4.30775e-08	4.67524e-07
ENSG00000167767	KRT80	107.956	1.09355	4.30601e-08	4.67524e-07
ENSG00000111665	CDCA3	850.909	-0.50834	4.42333e-08	4.79816e-07
ENSG00000068654	POLR1A	5250.91	-0.479451	4.46281e-08	4.83845e-07
ENSG00000141456	PELP1	3617.31	-0.612542	4.60785e-08	4.99309e-07
ENSG00000109118	PHF12	4442.04	0.294855	4.6375e-08	5.02258e-07
ENSG00000177311	ZBTB38	1727.98	0.318171	4.73024e-08	5.12034e-07
ENSG00000162775	RBM15	2024.74	-0.281064	4.92063e-08	5.32364e-07
ENSG00000168393	DTYMK	1787.2	-0.46272	4.93432e-08	5.33566e-07
ENSG00000187097	ENTPD5	2096.64	0.26129	4.95492e-08	5.35514e-07
ENSG00000137135	ARHGEF39	925.085	-0.426644	5.01933e-08	5.42193e-07
ENSG00000089195	TRMT6	711.626	-0.387895	5.0563e-08	5.45901e-07
ENSG00000103811	CTSH	3275.7	0.415694	5.14622e-08	5.55319e-07
ENSG00000272106	AL691432.2	449.029	0.514353	5.19332e-08	5.60109e-07
ENSG00000197183	NOL4L	500.32	0.430966	5.25571e-08	5.66543e-07
ENSG00000151287	TEX30	314.575	-0.577839	5.27053e-08	5.67458e-07
ENSG00000188167	TMPPE	977.385	-0.382138	5.27242e-08	5.67458e-07
ENSG00000255193	AC100768.2	177.205	0.8541	5.27175e-08	5.67458e-07
ENSG00000007168	PAFAH1B1	4413.09	0.29145	5.28301e-08	5.68302e-07
ENSG00000167608	TMC4	636.762	0.457111	5.38436e-08	5.78902e-07
ENSG00000103037	SETD6	653.747	-0.426472	5.39587e-08	5.79766e-07
ENSG00000163631	ALB	178.349	0.752991	5.398e-08	5.79766e-07
ENSG00000115594	IL1R1	996.238	-0.320314	5.41097e-08	5.80858e-07
ENSG00000139880	CDH24	402.804	0.502114	5.42347e-08	5.81898e-07
ENSG00000156030	ELMSAN1	2570.99	-0.509579	5.47489e-08	5.8711e-07
ENSG00000135045	C9orf40	445.031	-0.506356	5.49236e-08	5.88679e-07
ENSG00000161847	RAVER1	954.78	-0.443228	5.53726e-08	5.93183e-07
ENSG00000001497	LAS1L	1898.48	-0.677297	5.54428e-08	5.93628e-07
ENSG00000174938	SEZ6L2	2564.84	0.368341	5.61249e-08	6.0031e-07
ENSG00000197712	FAM114A1	1734.92	0.219728	5.61233e-08	6.0031e-07
ENSG00000178935	ZNF552	938.228	-0.361799	5.66558e-08	6.05675e-07
ENSG00000104067	TJP1	12083.8	-0.183211	5.67854e-08	6.06747e-07
ENSG00000188158	NHS	24.7363	1.85834	5.74045e-08	6.13045e-07
ENSG00000161267	BDH1	2462.19	-0.291295	5.79613e-08	6.18673e-07
ENSG00000126432	PRDX5	3725.4	0.589787	5.85091e-08	6.24197e-07
ENSG00000143622	RIT1	641.048	0.446411	5.85965e-08	6.24807e-07
ENSG00000150687	PRSS23	65.6034	1.24967	5.86588e-08	6.2515e-07
ENSG00000176974	SHMT1	2547.58	-0.277362	5.8924e-08	6.27358e-07
ENSG00000213015	ZNF580	391.84	0.599816	5.89267e-08	6.27358e-07
ENSG00000160803	UBQLN4	2660.33	-0.262615	5.91933e-08	6.29873e-07
ENSG00000010818	HIVEP2	1660.49	0.317768	6.07561e-08	6.4617e-07
ENSG00000179041	RRS1	1114.8	-0.831457	6.26942e-08	6.66439e-07
ENSG00000166004	CEP295	3103.16	-0.412784	6.33605e-08	6.73177e-07
ENSG00000253598	SLC10A5	95.5341	1.04675	6.4012e-08	6.7975e-07
ENSG00000155287	SLC25A28	365.411	-0.533037	6.49769e-08	6.89642e-07
ENSG00000125319	C17orf53	209.805	-0.627951	6.5281e-08	6.92514e-07
ENSG00000198298	ZNF485	575.477	-0.447982	6.53334e-08	6.92714e-07
ENSG00000141376	BCAS3	594.383	0.45991	6.56188e-08	6.95384e-07
ENSG00000254635	WAC-AS1	628.89	0.430392	6.56749e-08	6.95623e-07
ENSG00000174456	C12orf76	370.39	0.478433	6.58657e-08	6.97286e-07
ENSG00000107099	DOCK8	17.9887	-2.34676	6.61022e-08	6.99433e-07
ENSG00000185085	INTS5	1326.94	-0.369386	6.6504e-08	7.03324e-07
ENSG00000163702	IL17RC	954.012	0.444128	6.65866e-08	7.03837e-07
ENSG00000203760	CENPW	463.352	-0.447415	6.66281e-08	7.03916e-07
ENSG00000105364	MRPL4	2996.14	-0.477863	6.66755e-08	7.04058e-07
ENSG00000123329	ARHGAP9	16.6728	1.92368	6.68003e-08	7.05016e-07
ENSG00000068903	SIRT2	1573.94	0.35339	6.71932e-08	7.08354e-07
ENSG00000158941	CCAR2	4873.03	-0.383913	6.72194e-08	7.08354e-07
ENSG00000187446	CHP1	5858.65	0.22516	6.71869e-08	7.08354e-07
ENSG00000121104	FAM117A	475.818	0.497437	6.78323e-08	7.1445e-07
ENSG00000108947	EFNB3	60.6778	1.14785	6.84845e-08	7.20952e-07
ENSG00000255346	NOX5	97.5091	-0.897081	7.02237e-08	7.38885e-07
ENSG00000143578	CREB3L4	1775.85	-0.36338	7.06903e-08	7.43417e-07
ENSG00000106772	PRUNE2	38150.2	0.23452	7.1383e-08	7.5032e-07
ENSG00000114315	HES1	181.118	-0.643709	7.22985e-08	7.59557e-07
ENSG00000165730	STOX1	129.308	0.735065	7.26819e-08	7.63197e-07
ENSG00000047662	FAM184B	47.6416	1.2784	7.34559e-08	7.70933e-07
ENSG00000125741	OPA3	770.066	-0.433342	7.37359e-08	7.73479e-07
ENSG00000267106	ZNF561-AS1	428.207	0.488903	7.4641e-08	7.82576e-07
ENSG00000171867	PRNP	2802	0.245256	7.53351e-08	7.89454e-07
ENSG00000126453	BCL2L12	621.517	-0.519415	7.55643e-08	7.91455e-07
ENSG00000167775	CD320	2127.37	-0.480915	7.635e-08	7.9928e-07
ENSG00000102804	TSC22D1	3821.79	0.212718	7.64136e-08	7.9954e-07
ENSG00000112159	MDN1	2253.37	-0.577432	8.02675e-08	8.39441e-07
ENSG00000148688	RPP30	941.102	-0.402293	8.33974e-08	8.71733e-07
ENSG00000203943	SAMD13	401.641	0.498667	8.35102e-08	8.72471e-07
ENSG00000155189	AGPAT5	1356.19	-0.458411	8.48533e-08	8.86055e-07
ENSG00000140465	CYP1A1	64.8054	1.16011	8.54999e-08	8.92357e-07
ENSG00000141639	MAPK4	121.812	0.80604	8.60356e-08	8.97494e-07
ENSG00000182704	TSKU	1117.6	-0.33384	8.73692e-08	9.10947e-07
ENSG00000169598	DFFB	510.378	-0.420896	8.85375e-08	9.22663e-07
ENSG00000137834	SMAD6	935.467	-0.498598	8.96874e-08	9.34176e-07
ENSG00000113356	POLR3G	327.065	-0.491099	9.02121e-08	9.39169e-07
ENSG00000187164	SHTN1	2521.92	0.328734	9.14756e-08	9.51843e-07
ENSG00000156973	PDE6D	231.775	0.552368	9.25448e-08	9.62485e-07
ENSG00000099381	SETD1A	1882.59	-0.516032	9.29761e-08	9.66485e-07
ENSG00000103342	GSPT1	9930.9	-0.254959	9.34256e-08	9.70669e-07
ENSG00000159256	MORC3	739.339	0.517465	9.36944e-08	9.72973e-07
ENSG00000214814	FER1L6	23.7581	1.53484	9.40282e-08	9.7595e-07
ENSG00000146373	RNF217	74.5372	1.01549	9.43936e-08	9.7925e-07
ENSG00000168070	MAJIN	53.2371	1.40473	9.44558e-08	9.79405e-07
ENSG00000235314	LINC00957	181.822	0.620381	9.45168e-08	9.79547e-07
ENSG00000109107	ALDOC	1127.23	0.388145	9.52609e-08	9.86763e-07
ENSG00000109919	MTCH2	6385.27	-0.281167	9.56564e-08	9.90365e-07
ENSG00000100479	POLE2	329.387	-0.664722	9.69584e-08	1.00334e-06
[truncated: 55,861 more rows]

## Sheet: 24h_EPI001_25uM_vsDMSO
GeneID	Gene	baseMean	log2FoldChange	pvalue	padj
ENSG00000168209	DDIT4	3958.04	1.51218	3.27701e-128	5.76458e-124
ENSG00000103257	SLC7A5	1822.73	1.303	3.19096e-100	2.80661e-96
ENSG00000169122	FAM110B	1453.78	-0.950219	5.95986e-100	3.49466e-96
ENSG00000155657	TTN	763.523	-3.35841	2.6509e-99	1.1658e-95
ENSG00000008513	ST3GAL1	29874.2	0.682129	2.62698e-94	9.24223e-91
ENSG00000100889	PCK2	3854.94	1.28485	1.14519e-85	3.26894e-82
ENSG00000163492	CCDC141	217.154	-3.21418	1.30081e-85	3.26894e-82
ENSG00000167106	FAM102A	2012.45	1.23262	1.45834e-84	3.20671e-81
ENSG00000070669	ASNS	5194.02	1.14857	4.08358e-84	7.98157e-81
ENSG00000096060	FKBP5	3471.3	-1.28607	8.75882e-81	1.54076e-77
ENSG00000130513	GDF15	3393.21	1.66115	8.49186e-79	1.358e-75
ENSG00000135842	FAM129A	580.454	1.5094	2.00529e-72	2.93958e-69
ENSG00000091490	SEL1L3	4452.33	0.661731	5.85406e-71	7.92144e-68
ENSG00000106105	GARS	8018.64	0.662509	4.59823e-70	5.77768e-67
ENSG00000116574	RHOU	1564.41	-0.938124	6.07082e-68	7.11945e-65
ENSG00000124788	ATXN1	758.149	1.09276	5.36244e-66	5.89567e-63
ENSG00000182795	C1orf116	6975.32	-0.627609	8.56337e-65	8.86107e-62
ENSG00000167034	NKX3-1	13334.4	-0.796492	9.98041e-65	9.75363e-62
ENSG00000198648	STK39	3850.22	-0.634664	3.5796e-63	3.31415e-60
ENSG00000123983	ACSL3	6158.63	-0.898326	1.61838e-62	1.42345e-59
ENSG00000118985	ELL2	3594.42	-1.0199	4.71672e-62	3.95104e-59
ENSG00000151503	NCAPD3	5598.82	-0.624805	6.92135e-62	5.53425e-59
ENSG00000104738	MCM4	7890.14	-0.53858	5.51708e-61	4.21961e-58
ENSG00000124225	PMEPA1	4172.04	-0.864916	7.79049e-58	5.71011e-55
ENSG00000144476	ACKR3	2098.74	0.928548	1.16312e-52	8.18418e-50
ENSG00000196517	SLC6A9	582.112	1.19703	1.39156e-52	9.41495e-50
ENSG00000167751	KLK2	5507.81	-0.985276	2.36585e-52	1.5414e-49
ENSG00000150403	TMCO3	2177.47	0.650316	3.89831e-52	2.44911e-49
ENSG00000178573	MAF	198.414	-1.91406	9.89092e-52	5.9997e-49
ENSG00000166451	CENPN	2512.07	-0.821905	1.2105e-51	7.09798e-49
ENSG00000151012	SLC7A11	4468.46	1.39012	7.88167e-50	4.47247e-47
ENSG00000125266	EFNB2	1148.79	-0.943217	1.67695e-49	9.21852e-47
ENSG00000128965	CHAC1	432.786	1.7906	3.52549e-49	1.8793e-46
ENSG00000137801	THBS1	1123.99	-0.962634	4.89381e-49	2.53197e-46
ENSG00000120903	CHRNA2	879.96	-1.34514	5.84009e-49	2.93523e-46
ENSG00000140443	IGF1R	6656.11	-0.891521	1.3263e-48	6.48084e-46
ENSG00000002834	LASP1	3086.24	0.748103	3.20505e-48	1.52379e-45
ENSG00000135069	PSAT1	7931.12	0.823584	4.07264e-48	1.88531e-45
ENSG00000157514	TSC22D3	899.099	1.20869	2.51832e-47	1.13589e-44
ENSG00000106070	GRB10	19411.5	0.582398	6.33109e-47	2.78425e-44
ENSG00000069206	ADAM7	460.337	-1.48253	6.92785e-47	2.97239e-44
ENSG00000130766	SESN2	1486.15	1.06095	5.79503e-45	2.42715e-42
ENSG00000142515	KLK3	17049.7	-0.805024	2.38711e-43	9.7655e-41
ENSG00000163110	PDLIM5	4298.44	-0.474848	3.08572e-43	1.23366e-40
ENSG00000049449	RCN1	3058.76	0.515856	3.89822e-43	1.52386e-40
ENSG00000219481	NBPF1	4477.82	0.722153	3.11854e-42	1.19257e-39
ENSG00000198734	F5	292.54	-1.71997	9.87838e-41	3.69725e-38
ENSG00000175197	DDIT3	610.778	1.26284	3.6318e-40	1.33098e-37
ENSG00000144481	TRPM8	1022.72	-0.93337	1.35008e-39	4.84678e-37
ENSG00000128165	ADM2	1112.78	1.13155	1.49831e-39	5.27134e-37
ENSG00000101680	LAMA1	164.48	-1.78848	2.15271e-39	7.42516e-37
ENSG00000182319	NA	475.25	-1.29189	4.03112e-39	1.36368e-36
ENSG00000224259	LINC01133	189.583	1.99831	6.72688e-39	2.23269e-36
ENSG00000117595	IRF6	1843.17	0.673233	1.10833e-38	3.6105e-36
ENSG00000116062	MSH6	2728.51	-0.502426	9.76537e-38	3.12332e-35
ENSG00000113368	LMNB1	6293.78	-0.447867	1.87587e-36	5.89258e-34
ENSG00000101255	TRIB3	2626.12	0.983386	2.74158e-35	8.46089e-33
ENSG00000157600	TMEM164	3368.66	-0.587131	1.21946e-34	3.69853e-32
ENSG00000198417	MT1F	165.623	2.06647	1.69047e-34	5.04017e-32
ENSG00000122952	ZWINT	2567.57	-0.563143	2.37971e-34	6.97692e-32
ENSG00000144331	ZNF385B	1478.53	-0.591318	1.01641e-33	2.9311e-31
ENSG00000163251	FZD5	1581.11	-0.699996	3.08493e-33	8.75275e-31
ENSG00000145569	OTULINL	789.291	-0.974322	3.66829e-33	1.00826e-30
ENSG00000162772	ATF3	882.871	0.952412	3.63003e-33	1.00826e-30
ENSG00000135862	LAMC1	9983.69	-0.408192	9.0598e-33	2.45186e-30
ENSG00000166348	USP54	10708.1	0.43721	9.5173e-33	2.53665e-30
ENSG00000104356	POP1	1443.44	-0.60503	1.15966e-32	3.04472e-30
ENSG00000168003	SLC3A2	6034.09	0.742052	1.66836e-32	4.3159e-30
ENSG00000115902	SLC1A4	684.286	0.828794	2.30227e-32	5.86946e-30
ENSG00000065328	MCM10	2293.84	-0.557253	2.4355e-32	6.12041e-30
ENSG00000124145	SDC4	1759.02	0.752229	3.86384e-32	9.57306e-30
ENSG00000182481	KPNA2	5914.66	-0.509616	9.92874e-32	2.42578e-29
ENSG00000116584	ARHGEF2	1134.93	0.875127	3.17076e-31	7.64066e-29
ENSG00000088325	TPX2	6100.79	-0.42136	4.79174e-31	1.13907e-28
ENSG00000128272	ATF4	15024.4	0.894413	2.99186e-30	7.0173e-28
ENSG00000137501	SYTL2	755.998	0.978823	1.11325e-29	2.57673e-27
ENSG00000164045	CDC25A	2017.39	-0.510042	1.59094e-29	3.63457e-27
ENSG00000065911	MTHFD2	4616.24	0.487689	1.63185e-29	3.68024e-27
ENSG00000070526	ST6GALNAC1	1544.12	-0.873806	1.7466e-29	3.88917e-27
ENSG00000163406	SLC15A2	140.739	-1.61619	1.92437e-29	4.23145e-27
ENSG00000168159	RNF187	8936.34	0.783902	8.75561e-29	1.90148e-26
ENSG00000031698	SARS	5413.52	0.718269	1.20876e-28	2.59309e-26
ENSG00000051108	HERPUD1	2362.03	0.557633	9.90675e-28	2.09963e-25
ENSG00000105281	SLC1A5	5298.66	0.746116	1.24166e-27	2.60024e-25
ENSG00000135090	TAOK3	3634.43	-0.490787	2.68141e-27	5.54925e-25
ENSG00000014257	ACPP	645.56	0.806224	2.87529e-27	5.88131e-25
ENSG00000140105	WARS	3972.1	0.428057	5.07038e-27	1.02521e-24
ENSG00000156802	ATAD2	7119.03	-0.70573	6.68206e-27	1.33573e-24
ENSG00000125257	ABCC4	5579.74	-0.70445	1.48943e-26	2.94388e-24
ENSG00000128641	MYO1B	3208.06	-0.633356	1.73374e-26	3.3887e-24
ENSG00000010292	NCAPD2	9348.09	-0.430557	3.19192e-26	6.17023e-24
ENSG00000130338	TULP4	2319.58	0.510681	5.63062e-26	1.07661e-23
ENSG00000168411	RFWD3	2178.18	-0.425168	7.73624e-26	1.46331e-23
ENSG00000153179	RASSF3	17946	-0.51401	8.81374e-26	1.64939e-23
ENSG00000163683	SMIM14	1221.07	0.726975	9.99051e-26	1.84993e-23
ENSG00000197324	LRP10	3120.33	0.665002	1.07394e-25	1.96788e-23
ENSG00000136235	GPNMB	136.973	1.57072	1.44514e-25	2.62077e-23
ENSG00000105612	DNASE2	1352.82	0.829511	1.79236e-25	3.21728e-23
ENSG00000134057	CCNB1	5582.95	-0.572915	1.82958e-25	3.25093e-23
ENSG00000255353	AP003057.1	591.717	-0.839066	1.99264e-25	3.50525e-23
ENSG00000071539	TRIP13	1863.85	-0.441843	3.30834e-25	5.76208e-23
ENSG00000104081	BMF	879.541	0.618598	2.21963e-24	3.828e-22
ENSG00000162174	ASRGL1	1187.28	-0.761473	2.48618e-24	4.24605e-22
ENSG00000134333	LDHA	20814.1	-0.4541	2.66932e-24	4.515e-22
ENSG00000145779	TNFAIP8	529.357	-0.856991	3.98425e-24	6.67495e-22
ENSG00000111845	PAK1IP1	1073.99	-0.70497	4.17244e-24	6.92428e-22
ENSG00000103942	HOMER2	5312.61	-0.318382	5.08618e-24	8.36177e-22
ENSG00000138696	BMPR1B	311.501	-1.01626	5.34646e-24	8.70829e-22
ENSG00000129474	AJUBA	1076.55	0.793052	1.10669e-23	1.78603e-21
ENSG00000117289	NA	1205.03	-0.721742	1.15548e-23	1.84783e-21
ENSG00000144218	AFF3	1453.91	-0.640297	1.33261e-23	2.11189e-21
ENSG00000139209	SLC38A4	42.6983	-2.99987	1.36787e-23	2.14841e-21
ENSG00000110619	CARS	2176.18	0.66303	1.52234e-23	2.36986e-21
ENSG00000112984	KIF20A	2818.22	-0.604413	2.10098e-23	3.24197e-21
ENSG00000198901	PRC1	3305.63	-0.408045	2.98367e-23	4.56398e-21
ENSG00000076382	SPAG5	4136.6	-0.494855	3.59168e-23	5.40478e-21
ENSG00000182199	SHMT2	8458.39	0.580931	3.62551e-23	5.40478e-21
ENSG00000183117	CSMD1	2275.18	0.570006	3.61705e-23	5.40478e-21
ENSG00000116560	SFPQ	13115.1	-0.352102	4.99415e-23	7.38253e-21
ENSG00000100219	XBP1	5582.29	0.625808	5.90821e-23	8.66095e-21
ENSG00000166224	SGPL1	3348.21	0.344859	1.31733e-22	1.91514e-20
ENSG00000183666	GUSBP1	1916.52	0.507169	1.39333e-22	2.00902e-20
ENSG00000131504	DIAPH1	9835.6	-0.391097	1.93205e-22	2.76314e-20
ENSG00000070081	NUCB2	1530.46	0.768584	2.67845e-22	3.79972e-20
ENSG00000140525	FANCI	4564.65	-0.468448	4.47108e-22	6.29206e-20
ENSG00000078018	MAP2	1078.17	-0.651601	5.10153e-22	7.1223e-20
ENSG00000172432	GTPBP2	693.087	0.886897	5.23932e-22	7.25708e-20
ENSG00000139112	GABARAPL1	783.045	0.659496	5.8955e-22	8.05539e-20
ENSG00000153879	CEBPG	1949.51	0.54831	5.90726e-22	8.05539e-20
ENSG00000114450	GNB4	722.168	-0.886376	9.37729e-22	1.26889e-19
ENSG00000101384	JAG1	2202.2	-0.445845	1.72467e-21	2.31594e-19
ENSG00000113739	STC2	2149.9	0.750151	1.96085e-21	2.61314e-19
ENSG00000155846	PPARGC1B	1350.52	-0.609951	1.99723e-21	2.6416e-19
ENSG00000189056	RELN	401.371	1.08809	2.0867e-21	2.73934e-19
ENSG00000146859	TMEM140	210.07	1.20418	2.3904e-21	3.11477e-19
ENSG00000145220	LYAR	982.281	-0.596227	2.63869e-21	3.41303e-19
ENSG00000163171	CDC42EP3	1451.33	-0.573887	2.92583e-21	3.72959e-19
ENSG00000166750	SLFN5	1460.49	0.633574	2.90908e-21	3.72959e-19
ENSG00000120800	UTP20	3968.1	-0.493419	3.18024e-21	4.02472e-19
ENSG00000143476	DTL	1759.21	-0.592834	3.47836e-21	4.37056e-19
ENSG00000092621	PHGDH	12076.4	0.702907	4.77906e-21	5.92401e-19
ENSG00000175928	LRRN1	1730.83	0.603229	4.78204e-21	5.92401e-19
ENSG00000151025	GPR158	3940.1	-0.424722	5.9148e-21	7.27603e-19
ENSG00000197822	OCLN	814.451	0.592155	6.24911e-21	7.6339e-19
ENSG00000162496	DHRS3	177.783	1.28651	7.77297e-21	9.42995e-19
ENSG00000087586	AURKA	2022.56	-0.435894	9.16487e-21	1.10424e-18
ENSG00000117143	UAP1	8424.42	-0.558879	1.13111e-20	1.35357e-18
ENSG00000075218	GTSE1	1616.83	-0.452008	1.15892e-20	1.37747e-18
ENSG00000224186	C5orf66	427.358	0.866123	1.23733e-20	1.4608e-18
ENSG00000067798	NAV3	1463.45	-0.664923	1.34994e-20	1.58312e-18
ENSG00000164120	HPGD	121.758	-1.5459	1.97068e-20	2.29578e-18
ENSG00000166173	LARP6	365.534	0.869855	2.1436e-20	2.4808e-18
ENSG00000183044	ABAT	1610.17	0.434632	2.61456e-20	3.00606e-18
ENSG00000149260	CAPN5	216.159	1.06353	2.72144e-20	3.10862e-18
ENSG00000161800	RACGAP1	3302.87	-0.39078	3.86267e-20	4.38376e-18
ENSG00000116260	QSOX1	5953.49	0.574642	4.42371e-20	4.9883e-18
ENSG00000090889	KIF4A	2026.14	-0.442399	5.7929e-20	6.49064e-18
ENSG00000147526	TACC1	4836.99	-0.400912	6.76656e-20	7.53358e-18
ENSG00000176890	TYMS	4473.74	-0.416123	7.03246e-20	7.78038e-18
ENSG00000197888	UGT2B17	2234.09	0.765962	7.45738e-20	8.19892e-18
ENSG00000109452	INPP4B	530.48	-0.801427	1.22946e-19	1.34331e-17
ENSG00000092607	TBX15	57.5514	-2.00601	1.28439e-19	1.39468e-17
ENSG00000146733	PSPH	1676.29	0.605715	1.5319e-19	1.65323e-17
ENSG00000196950	SLC39A10	1405.96	-0.923921	1.69914e-19	1.82254e-17
ENSG00000095319	NUP188	6107.15	-0.350453	2.36871e-19	2.52533e-17
ENSG00000130517	PGPEP1	1125.1	0.695755	3.44683e-19	3.6526e-17
ENSG00000236404	VLDLR-AS1	74.2253	1.74962	4.10221e-19	4.32108e-17
ENSG00000035499	DEPDC1B	1445.45	-0.549024	5.26735e-19	5.51535e-17
ENSG00000136783	NIPSNAP3A	1414.91	0.695972	7.47403e-19	7.77963e-17
ENSG00000102172	SMS	4343.74	-0.384326	8.5335e-19	8.83016e-17
ENSG00000125144	MT1G	121.632	1.75033	9.34789e-19	9.58258e-17
ENSG00000171241	SHCBP1	1556.81	-0.481928	9.36959e-19	9.58258e-17
ENSG00000068489	PRR11	1977.3	-0.479167	1.04856e-18	1.0662e-16
ENSG00000167325	RRM1	7075.74	-0.438427	1.18298e-18	1.19596e-16
ENSG00000149809	TM7SF2	4126.13	0.699251	1.28993e-18	1.29663e-16
ENSG00000108424	KPNB1	18255.4	-0.312337	1.31358e-18	1.31291e-16
ENSG00000120875	DUSP4	533.042	-0.674891	1.47772e-18	1.46862e-16
ENSG00000143797	MBOAT2	5605.44	-0.72519	1.58301e-18	1.56443e-16
ENSG00000181019	NQO1	6359.16	0.820556	1.66792e-18	1.63913e-16
ENSG00000184661	CDCA2	2242.83	-0.445441	1.68267e-18	1.64444e-16
ENSG00000075643	MOCOS	1750.05	0.419036	2.94813e-18	2.86523e-16
ENSG00000125148	MT2A	2768.5	1.07591	3.03108e-18	2.92966e-16
ENSG00000011426	ANLN	3865.44	-0.504689	3.95118e-18	3.7981e-16
ENSG00000134765	DSC1	97.2719	-1.4644	4.08097e-18	3.90154e-16
ENSG00000165821	SALL2	783.127	0.591542	8.14814e-18	7.74778e-16
ENSG00000103222	ABCC1	6084.64	-0.423612	8.49156e-18	8.03091e-16
ENSG00000141934	PLPP2	446.948	0.934813	9.25583e-18	8.70692e-16
ENSG00000154144	TBRG1	3999.7	-0.362164	1.10227e-17	1.03138e-15
ENSG00000037474	NSUN2	4017.73	-0.329951	1.14743e-17	1.06796e-15
ENSG00000143164	DCAF6	4863.56	-0.37908	1.20269e-17	1.1135e-15
ENSG00000138641	HERC3	7235.46	-0.459292	1.21921e-17	1.12289e-15
ENSG00000130707	ASS1	2211.26	0.59959	1.31137e-17	1.20147e-15
ENSG00000071242	RPS6KA2	1741.17	0.494368	1.48082e-17	1.3497e-15
ENSG00000136868	SLC31A1	4058.86	0.384561	1.69052e-17	1.53288e-15
ENSG00000094804	CDC6	2813.41	-0.378909	1.96718e-17	1.7746e-15
ENSG00000185630	PBX1	554.075	0.762027	2.02541e-17	1.81781e-15
ENSG00000078699	CBFA2T2	2751.04	0.430727	2.25656e-17	2.01498e-15
ENSG00000167566	NCKAP5L	345.437	0.810992	2.49168e-17	2.21369e-15
ENSG00000166986	MARS	6374.48	0.465434	2.83633e-17	2.50723e-15
ENSG00000197321	SVIL	489.882	0.827644	3.00258e-17	2.64092e-15
ENSG00000145604	SKP2	2139.65	-0.649542	3.02966e-17	2.65148e-15
ENSG00000196208	GREB1	1051.82	-0.742359	3.57305e-17	3.11156e-15
ENSG00000111275	ALDH2	358.631	0.761267	3.80604e-17	3.29813e-15
ENSG00000068971	PPP2R5B	466.503	0.780728	3.85399e-17	3.32331e-15
ENSG00000181634	TNFSF15	397.423	0.816828	3.91381e-17	3.35843e-15
ENSG00000197406	DIO3	30.4213	3.17875	4.28273e-17	3.65716e-15
ENSG00000161011	SQSTM1	6143.69	0.58311	4.36803e-17	3.71198e-15
ENSG00000142207	URB1	3207.59	-0.376727	4.71884e-17	3.99082e-15
ENSG00000164125	FAM198B	3307.67	0.663356	4.74481e-17	3.99359e-15
ENSG00000131844	MCCC2	4371.67	-0.347583	5.01844e-17	4.20378e-15
ENSG00000160208	RRP1B	2644.72	-0.35266	5.5265e-17	4.58569e-15
ENSG00000171848	RRM2	6124.02	-0.443932	5.51511e-17	4.58569e-15
ENSG00000156970	BUB1B	2686.9	-0.475709	5.73585e-17	4.73706e-15
ENSG00000086205	FOLH1	26361	0.36517	6.37069e-17	5.23677e-15
ENSG00000145703	IQGAP2	1493.99	-0.615383	6.75444e-17	5.52639e-15
ENSG00000120802	TMPO	6999.1	-0.427665	7.7397e-17	6.27415e-15
ENSG00000177000	MTHFR	1210.45	0.428842	7.73623e-17	6.27415e-15
ENSG00000082516	GEMIN5	1846.77	-0.395273	8.11508e-17	6.54827e-15
ENSG00000026025	VIM	281.399	0.805922	8.29097e-17	6.65966e-15
ENSG00000072210	ALDH3A2	3737.7	0.45406	8.68124e-17	6.94144e-15
ENSG00000135452	TSPAN31	503.71	0.671589	9.00608e-17	7.1686e-15
ENSG00000198793	MTOR	5461.83	-0.391943	9.22756e-17	7.3118e-15
ENSG00000104419	NDRG1	2398.85	-0.464517	9.27739e-17	7.31832e-15
ENSG00000179104	TMTC2	1427.06	-0.471454	1.00834e-16	7.91863e-15
ENSG00000136689	IL1RN	167.612	1.1956	1.1924e-16	9.32246e-15
ENSG00000089685	BIRC5	4318.14	-0.434175	1.21399e-16	9.44926e-15
ENSG00000113161	HMGCR	3845.12	-0.484443	1.22132e-16	9.46441e-15
ENSG00000100292	HMOX1	279.049	1.1344	1.25662e-16	9.69524e-15
ENSG00000103121	CMC2	1444.02	-0.563655	1.49047e-16	1.14493e-14
ENSG00000101447	FAM83D	2054.7	-0.476299	1.49952e-16	1.14687e-14
ENSG00000165304	MELK	2126	-0.420948	1.51398e-16	1.15292e-14
ENSG00000107949	BCCIP	2901.12	-0.485812	1.84044e-16	1.39548e-14
ENSG00000076003	MCM6	3627.86	-0.416517	2.06604e-16	1.55982e-14
ENSG00000035862	TIMP2	804.997	0.588749	2.10208e-16	1.58025e-14
ENSG00000166851	PLK1	3644.25	-0.46802	2.23735e-16	1.67477e-14
ENSG00000166292	TMEM100	40.4651	-2.87912	2.65426e-16	1.97844e-14
ENSG00000132437	DDC	3642.51	0.448545	2.75949e-16	2.04819e-14
ENSG00000147536	GINS4	1254.4	-0.442397	2.78278e-16	2.0568e-14
ENSG00000100749	VRK1	1099.99	-0.550636	2.96814e-16	2.18462e-14
ENSG00000110841	PPFIBP1	2184.32	-0.469386	3.50595e-16	2.56972e-14
ENSG00000161638	ITGA5	898.852	0.70971	4.48842e-16	3.27617e-14
ENSG00000151690	MFSD6	1221.56	0.466709	4.97454e-16	3.61599e-14
ENSG00000110713	NUP98	7535.38	-0.320874	5.05522e-16	3.65952e-14
ENSG00000154035	NA	162.767	1.14209	6.87383e-16	4.95564e-14
ENSG00000116133	DHCR24	24603.5	-0.394031	6.97548e-16	4.98803e-14
ENSG00000127954	STEAP4	29.8884	-3.05011	6.96409e-16	4.98803e-14
ENSG00000158715	SLC45A3	7519.29	-0.383127	7.03724e-16	5.01182e-14
ENSG00000177302	TOP3A	2373.54	-0.336277	7.15939e-16	5.07826e-14
ENSG00000157456	CCNB2	2130.16	-0.428817	7.37032e-16	5.20688e-14
ENSG00000120907	ADRA1A	65.1879	1.68095	7.9828e-16	5.61701e-14
ENSG00000143337	TOR1AIP1	1798.75	0.420797	8.28855e-16	5.80892e-14
ENSG00000160179	ABCG1	466.497	0.753691	8.74116e-16	6.10182e-14
ENSG00000169679	BUB1	1915.07	-0.504779	1.01084e-15	7.02832e-14
ENSG00000248498	ASNSP1	95.8138	1.56354	1.07234e-15	7.42658e-14
ENSG00000111206	FOXM1	5533.33	-0.401607	1.09918e-15	7.58261e-14
ENSG00000084463	WBP11	3267.25	-0.386404	1.1193e-15	7.69126e-14
ENSG00000099942	CRKL	4333.14	-0.281414	1.13402e-15	7.76206e-14
ENSG00000125885	MCM8	1919.33	-0.469287	1.20297e-15	8.2021e-14
ENSG00000139182	CLSTN3	1247.55	0.571736	1.28017e-15	8.69477e-14
ENSG00000198700	IPO9	5219.98	-0.27024	1.30957e-15	8.86022e-14
ENSG00000111912	NCOA7	818.065	0.578686	1.42428e-15	9.5628e-14
ENSG00000155561	NUP205	7296.62	-0.382768	1.4205e-15	9.5628e-14
ENSG00000143416	SELENBP1	13453.5	0.548999	1.46665e-15	9.80985e-14
ENSG00000261061	AC092718.4	335.452	-0.926657	1.75634e-15	1.17029e-13
ENSG00000146731	CCT6A	12022.7	-0.377726	1.793e-15	1.19021e-13
ENSG00000128944	KNSTRN	1547.07	-0.470748	1.92949e-15	1.276e-13
ENSG00000176046	NUPR1	3941.08	0.950385	1.99412e-15	1.31381e-13
ENSG00000249641	HOXC13-AS	231.699	1.0854	2.00346e-15	1.31504e-13
ENSG00000093009	CDC45	1423.76	-0.415279	2.22789e-15	1.45691e-13
ENSG00000135226	UGT2B28	35.7057	-2.35401	2.30057e-15	1.49334e-13
ENSG00000253203	GUSBP3	402.473	0.706899	2.3003e-15	1.49334e-13
ENSG00000111266	DUSP16	2507.55	0.321026	2.52918e-15	1.63569e-13
ENSG00000184349	EFNA5	10686.3	-0.342848	2.59249e-15	1.6705e-13
ENSG00000110660	SLC35F2	1758.48	-0.359569	2.96284e-15	1.90216e-13
ENSG00000166123	GPT2	4021.29	0.50191	3.08893e-15	1.97591e-13
ENSG00000198554	WDHD1	1938.84	-0.502916	3.2594e-15	2.0774e-13
ENSG00000082014	SMARCD3	637.271	0.691326	3.28087e-15	2.08353e-13
ENSG00000151726	ACSL1	3742.49	0.331141	3.60966e-15	2.28409e-13
ENSG00000178105	DDX10	1878.96	-0.376798	5.17105e-15	3.26035e-13
ENSG00000163273	NPPC	42.702	-1.94646	5.58681e-15	3.50991e-13
ENSG00000121152	NCAPH	1922.34	-0.450125	5.84332e-15	3.658e-13
ENSG00000114302	PRKAR2A	4656.38	-0.251987	5.99497e-15	3.73671e-13
ENSG00000140526	ABHD2	25298.1	-0.367529	6.01154e-15	3.73671e-13
ENSG00000164181	ELOVL7	5246.75	-0.912025	6.05786e-15	3.75224e-13
ENSG00000138092	CENPO	1769.52	-0.390145	6.11453e-15	3.77406e-13
ENSG00000085511	MAP3K4	1686.66	-0.391972	6.16027e-15	3.789e-13
ENSG00000105223	PLD3	2999.42	0.529709	6.29654e-15	3.85932e-13
ENSG00000269343	ZNF587B	1855.85	-0.447696	6.5704e-15	4.01319e-13
ENSG00000166780	C16orf45	186.68	1.0689	6.83843e-15	4.16245e-13
ENSG00000026559	KCNG1	189.753	0.993261	7.37595e-15	4.47415e-13
ENSG00000244462	RBM12	4450.61	-0.347451	7.76279e-15	4.69262e-13
ENSG00000140044	JDP2	638.687	0.697995	8.07319e-15	4.86354e-13
ENSG00000078114	NEBL	477.51	0.894373	8.35495e-15	5.01611e-13
ENSG00000132837	DMGDH	65.5572	1.52293	8.76809e-15	5.24624e-13
ENSG00000117399	CDC20	4112.31	-0.529859	9.1952e-15	5.48314e-13
ENSG00000145088	EAF2	178.921	-1.2376	9.92762e-15	5.89989e-13
ENSG00000125871	MGME1	1546.86	-0.394791	1.01963e-14	6.03914e-13
ENSG00000101003	GINS1	2973.6	-0.470396	1.04294e-14	6.15649e-13
ENSG00000100714	MTHFD1	8946.81	-0.292287	1.10201e-14	6.48342e-13
ENSG00000162545	CAMK2N1	756.127	0.61165	1.18502e-14	6.94858e-13
ENSG00000175216	CKAP5	10923.8	-0.322509	1.23867e-14	7.23899e-13
ENSG00000175155	YPEL2	370.219	0.740215	1.33676e-14	7.78642e-13
ENSG00000172785	CBWD1	1400.88	-0.503652	1.47711e-14	8.5755e-13
ENSG00000123374	CDK2	3141.74	-0.362118	1.48227e-14	8.57716e-13
ENSG00000117461	PIK3R3	5258.54	0.284118	1.50362e-14	8.6722e-13
ENSG00000035664	DAPK2	192.369	0.978119	1.71677e-14	9.8692e-13
ENSG00000172216	CEBPB	833.581	0.793116	1.82144e-14	1.04368e-12
ENSG00000084636	COL16A1	53.0921	2.13075	2.03895e-14	1.16452e-12
ENSG00000166446	CDYL2	1757.98	-0.389958	3.08676e-14	1.75725e-12
ENSG00000134690	CDCA8	1911.25	-0.421122	3.54125e-14	2.00303e-12
ENSG00000146674	IGFBP3	612.651	0.622773	3.54073e-14	2.00303e-12
ENSG00000239306	RBM14	2663.7	-0.344086	3.92574e-14	2.21339e-12
ENSG00000135763	URB2	1347.81	-0.468824	4.17741e-14	2.34776e-12
ENSG00000085999	RAD54L	1459.4	-0.456268	4.60942e-14	2.5823e-12
ENSG00000120694	HSPH1	6085.33	-0.518021	4.65139e-14	2.59754e-12
ENSG00000167552	TUBA1A	1389.09	0.606923	5.0811e-14	2.82853e-12
ENSG00000168827	GFM1	4655.06	-0.362838	5.38384e-14	2.98761e-12
ENSG00000171793	CTPS1	3252.92	-0.298033	5.90771e-14	3.26801e-12
ENSG00000187741	FANCA	1279.36	-0.423774	6.19053e-14	3.41372e-12
ENSG00000137807	KIF23	1307.77	-0.452522	6.38693e-14	3.51101e-12
ENSG00000167996	FTH1	58960.4	0.566587	6.5275e-14	3.57711e-12
ENSG00000049246	PER3	2057.66	-0.339308	6.97855e-14	3.81241e-12
ENSG00000079246	XRCC5	15020.9	-0.3473	7.49602e-14	4.08243e-12
ENSG00000130522	JUND	1899.24	0.626294	7.54816e-14	4.09814e-12
ENSG00000091651	ORC6	1272.54	-0.476438	8.149e-14	4.41074e-12
ENSG00000149218	ENDOD1	13756.9	-0.325983	8.98252e-14	4.84698e-12
ENSG00000158270	COLEC12	829.901	0.576807	9.91556e-14	5.33409e-12
ENSG00000136205	TNS3	80.4538	-1.47712	1.0104e-13	5.4189e-12
ENSG00000211689	TRGC1	134.421	-1.36354	1.09444e-13	5.85175e-12
ENSG00000148840	PPRC1	3433.29	-0.41071	1.11921e-13	5.96608e-12
ENSG00000111490	TBC1D30	2219.93	-0.352789	1.18191e-13	6.26236e-12
ENSG00000186185	KIF18B	1960.16	-0.451987	1.17882e-13	6.26236e-12
ENSG00000111696	NT5DC3	1184.31	-0.492293	1.25331e-13	6.62073e-12
ENSG00000052344	PRSS8	1420.82	0.630081	1.34015e-13	7.05827e-12
ENSG00000065833	ME1	1506.76	0.528401	1.38605e-13	7.27819e-12
ENSG00000076554	TPD52	3096.71	-0.499851	1.40371e-13	7.34903e-12
ENSG00000136840	ST6GALNAC4	466.46	0.750349	1.49191e-13	7.7876e-12
ENSG00000119669	IRF2BPL	5394.89	0.367275	1.5178e-13	7.89928e-12
ENSG00000259279	NA	49.1021	1.6279	1.59332e-13	8.26787e-12
ENSG00000178761	FAM219B	1613.8	0.441784	1.62036e-13	8.38345e-12
ENSG00000184545	DUSP8	968.459	0.529827	1.68152e-13	8.67435e-12
ENSG00000144354	CDCA7	700.892	-0.482069	1.75926e-13	9.02985e-12
ENSG00000169252	ADRB2	970.601	-0.491299	1.7607e-13	9.02985e-12
ENSG00000179094	PER1	784.347	-0.583259	1.83811e-13	9.3995e-12
ENSG00000100526	CDKN3	1085.93	-0.514444	1.85877e-13	9.47755e-12
ENSG00000163435	ELF3	583.454	0.663324	2.01499e-13	1.02444e-11
ENSG00000090621	PABPC4	8156.34	-0.23828	2.03158e-13	1.0299e-11
ENSG00000133119	RFC3	1379.99	-0.492341	2.37496e-13	1.20052e-11
ENSG00000102870	ZNF629	417.748	0.714586	2.50138e-13	1.2608e-11
ENSG00000140534	TICRR	2325.72	-0.493876	2.54092e-13	1.27706e-11
ENSG00000163697	APBB2	1210.63	0.430288	2.79383e-13	1.40018e-11
ENSG00000136478	TEX2	2323.19	-0.304543	2.96973e-13	1.4841e-11
ENSG00000167721	TSR1	4587.59	-0.353838	3.07152e-13	1.53063e-11
ENSG00000140564	FURIN	1202.96	0.522106	3.20372e-13	1.59199e-11
ENSG00000012223	LTF	37.8687	1.98753	3.42179e-13	1.69081e-11
ENSG00000065183	WDR3	4345.57	-0.356223	3.41586e-13	1.69081e-11
ENSG00000116667	C1orf21	1724.63	-0.305982	3.59494e-13	1.77139e-11
ENSG00000255717	SNHG1	4427.79	-0.439477	3.64135e-13	1.78924e-11
ENSG00000164867	NOS3	58.8632	1.71187	3.70075e-13	1.81337e-11
ENSG00000141736	ERBB2	5362.42	0.479794	3.75896e-13	1.83678e-11
ENSG00000104687	GSR	9092	-0.273129	4.31176e-13	2.10106e-11
ENSG00000128833	MYO5C	4397.3	-0.324092	4.46917e-13	2.17174e-11
ENSG00000035681	NSMAF	1309.53	-0.392127	4.51716e-13	2.18902e-11
ENSG00000181938	GINS3	709.603	-0.512982	4.61446e-13	2.23003e-11
ENSG00000187398	LUZP2	2254.06	0.44267	4.6932e-13	2.26186e-11
ENSG00000049759	NEDD4L	7906.02	-0.259567	4.73435e-13	2.27546e-11
ENSG00000100647	SUSD6	1653.06	0.418867	5.47611e-13	2.6248e-11
ENSG00000164307	ERAP1	399.627	0.61071	5.59357e-13	2.67382e-11
ENSG00000116299	KIAA1324	285.779	0.725478	5.64749e-13	2.69227e-11
ENSG00000137804	NUSAP1	4276.06	-0.464038	5.84548e-13	2.77913e-11
ENSG00000102098	SCML2	672.859	-0.480282	6.29299e-13	2.98383e-11
ENSG00000030066	NUP160	3476.1	-0.348607	6.71172e-13	3.17381e-11
ENSG00000168496	FEN1	4051.5	-0.410422	7.18171e-13	3.38696e-11
ENSG00000159840	ZYX	1194.68	0.576639	7.43856e-13	3.49871e-11
ENSG00000138180	CEP55	984.422	-0.524822	7.93332e-13	3.72147e-11
ENSG00000118655	DCLRE1B	862.281	-0.410114	8.00351e-13	3.74441e-11
ENSG00000135373	EHF	12157.3	-0.356098	8.21211e-13	3.83181e-11
ENSG00000170412	GPRC5C	339.29	0.87732	8.98912e-13	4.18327e-11
ENSG00000102780	DGKH	7387.7	0.611347	9.16292e-13	4.2529e-11
ENSG00000120334	CENPL	687.444	-0.446749	9.49433e-13	4.39513e-11
ENSG00000160124	CCDC58	978.545	-0.473464	1.00459e-12	4.63825e-11
ENSG00000093000	NUP50	5100.53	-0.295878	1.09154e-12	5.02654e-11
ENSG00000140332	TLE3	7771.66	0.377146	1.10056e-12	5.05481e-11
ENSG00000111907	TPD52L1	1418.56	0.458224	1.19325e-12	5.46624e-11
ENSG00000113407	TARS	9609.59	0.296558	1.25069e-12	5.71451e-11
ENSG00000067533	RRP15	962.931	-0.426345	1.43586e-12	6.54359e-11
ENSG00000147454	SLC25A37	3122.87	-0.294823	1.46364e-12	6.65292e-11
ENSG00000134684	YARS	5719.95	0.358368	1.46817e-12	6.65633e-11
ENSG00000198363	ASPH	8183.73	0.274672	1.49699e-12	6.76955e-11
ENSG00000100297	MCM5	3634.1	-0.386864	1.5339e-12	6.91869e-11
ENSG00000041880	PARP3	392.225	0.704154	1.55423e-12	6.99242e-11
ENSG00000095321	CRAT	1045.46	0.619138	1.60904e-12	7.22058e-11
ENSG00000165424	ZCCHC24	949.972	0.419436	1.70482e-12	7.63092e-11
ENSG00000133065	SLC41A1	2779.8	-0.344692	1.74375e-12	7.78537e-11
ENSG00000140465	CYP1A1	64.8054	1.51841	1.94805e-12	8.67549e-11
ENSG00000164091	WDR82	6509.97	-0.216966	2.0108e-12	8.93232e-11
ENSG00000228716	DHFR	4665.55	-0.349715	2.16805e-12	9.6066e-11
ENSG00000120438	TCP1	15341.1	-0.294936	2.19607e-12	9.70629e-11
ENSG00000176533	GNG7	342.223	0.640651	2.39283e-12	1.05494e-10
ENSG00000107937	GTPBP4	4438.93	-0.354012	2.45505e-12	1.07967e-10
ENSG00000080608	PUM3	1069.33	-0.451851	2.46793e-12	1.08263e-10
ENSG00000112249	ASCC3	4788.89	-0.520623	2.59605e-12	1.136e-10
ENSG00000005189	REXO5	863.861	-0.407614	2.64235e-12	1.15339e-10
ENSG00000100100	PIK3IP1	408.251	0.697761	2.80639e-12	1.22196e-10
ENSG00000080493	SLC4A4	1267.27	-0.543434	2.92168e-12	1.26902e-10
ENSG00000170122	FOXD4	252.114	-0.74052	3.20656e-12	1.38932e-10
ENSG00000012048	BRCA1	2819.42	-0.405672	3.35399e-12	1.44963e-10
ENSG00000135829	DHX9	11355.6	-0.285955	3.4234e-12	1.476e-10
ENSG00000003147	ICA1	1324.56	0.339554	3.67067e-12	1.57875e-10
ENSG00000188848	BEND4	1225.84	-0.63841	4.08727e-12	1.75364e-10
ENSG00000141027	NCOR1	11784.6	-0.255229	4.19655e-12	1.79615e-10
ENSG00000021300	PLEKHB1	4464.94	0.432746	4.69921e-12	2.0064e-10
ENSG00000051825	MPHOSPH9	3289.46	-0.554578	4.84906e-12	2.06537e-10
ENSG00000109606	DHX15	8998	-0.368726	5.09214e-12	2.16367e-10
ENSG00000101868	POLA1	1940.56	-0.367375	5.11051e-12	2.16624e-10
ENSG00000111445	RFC5	1775.48	-0.387042	5.17397e-12	2.18787e-10
ENSG00000184304	PRKD1	9066.84	0.304361	5.31326e-12	2.24138e-10
ENSG00000044574	HSPA5	19232.7	0.288816	5.60122e-12	2.3572e-10
ENSG00000005100	DHX33	1863.66	-0.335569	5.73554e-12	2.40543e-10
ENSG00000141179	PCTP	436.879	-0.576682	5.74318e-12	2.40543e-10
ENSG00000148459	PDSS1	737.176	-0.462188	5.97923e-12	2.49835e-10
ENSG00000011304	PTBP1	13667.6	-0.299531	6.20227e-12	2.58109e-10
ENSG00000161547	SRSF2	6817.28	-0.28975	6.20658e-12	2.58109e-10
ENSG00000055044	NOP58	3866.09	-0.391265	6.41155e-12	2.66004e-10
ENSG00000154124	OTULIN	1693.75	-0.485428	7.73454e-12	3.20137e-10
ENSG00000095739	BAMBI	608.753	0.564601	7.79776e-12	3.21996e-10
ENSG00000142864	SERBP1	15574.4	-0.243138	8.14328e-12	3.35477e-10
ENSG00000148773	MKI67	11499.6	-0.456611	8.2315e-12	3.38318e-10
ENSG00000169692	AGPAT2	525.551	0.75933	8.62849e-12	3.53808e-10
ENSG00000143158	MPC2	8469.31	-0.421424	8.92007e-12	3.64685e-10
ENSG00000181744	C3orf58	285.676	-0.863803	8.93521e-12	3.64685e-10
ENSG00000267041	ZNF850	1190.82	-0.627823	9.17472e-12	3.73594e-10
ENSG00000158186	MRAS	427.5	0.53314	9.73459e-12	3.95476e-10
ENSG00000163950	SLBP	2568.56	-0.371801	9.79227e-12	3.96903e-10
ENSG00000011007	ELOA	2892.8	-0.273912	9.93066e-12	4.01587e-10
ENSG00000115616	SLC9A2	2053.72	-0.399014	1.05513e-11	4.25706e-10
ENSG00000115875	SRSF7	3951.03	-0.299198	1.10353e-11	4.432e-10
ENSG00000159842	ABR	2321.01	0.456479	1.10107e-11	4.432e-10
ENSG00000123908	AGO2	3154.11	-0.331295	1.15081e-11	4.61136e-10
ENSG00000100867	DHRS2	397.041	-0.607549	1.16766e-11	4.66827e-10
ENSG00000162408	NOL9	3422.25	-0.352943	1.24411e-11	4.96263e-10
ENSG00000144560	VGLL4	2536.77	0.273006	1.2964e-11	5.15951e-10
ENSG00000099194	SCD	12115.6	0.325695	1.43082e-11	5.66883e-10
ENSG00000173566	NA	289.803	0.664704	1.42907e-11	5.66883e-10
ENSG00000146904	EPHA1	385.074	0.628703	1.5717e-11	6.213e-10
ENSG00000130713	EXOSC2	2716.61	-0.322983	1.66349e-11	6.56108e-10
ENSG00000123364	HOXC13	579.912	0.595091	1.71581e-11	6.75232e-10
ENSG00000137337	MDC1	1063.17	-0.524533	1.87875e-11	7.37704e-10
ENSG00000197746	PSAP	16263.1	0.342405	1.8953e-11	7.42545e-10
ENSG00000146433	TMEM181	1112.47	0.394222	1.98926e-11	7.77625e-10
ENSG00000160058	BSDC1	1872.1	0.366385	2.0056e-11	7.82274e-10
ENSG00000096088	PGC	39.9455	-1.86736	2.03652e-11	7.92576e-10
ENSG00000174442	ZWILCH	1959.42	-0.635322	2.06899e-11	8.03434e-10
ENSG00000133134	BEX2	599.139	0.618216	2.09268e-11	8.10845e-10
ENSG00000116830	TTF2	2525.05	-0.361627	2.11559e-11	8.17918e-10
ENSG00000108559	NUP88	3300.8	-0.318095	2.15225e-11	8.3027e-10
ENSG00000178999	AURKB	1384.33	-0.386918	2.17197e-11	8.36044e-10
ENSG00000131876	SNRPA1	1609.45	-0.351455	2.22868e-11	8.56e-10
ENSG00000144749	LRIG1	2094.33	-0.307575	2.48123e-11	9.50922e-10
ENSG00000052795	FNIP2	1299.04	-0.330478	2.50659e-11	9.58553e-10
ENSG00000133226	SRRM1	4804.54	-0.289724	2.55667e-11	9.75583e-10
ENSG00000075336	TIMM21	1516.81	-0.394982	2.56551e-11	9.76839e-10
ENSG00000146918	NCAPG2	2795.02	-0.342709	2.73821e-11	1.04034e-09
ENSG00000108179	PPIF	7605.83	-0.324105	2.81267e-11	1.06633e-09
ENSG00000105576	TNPO2	6263.97	-0.301739	2.82767e-11	1.06971e-09
ENSG00000187555	USP7	6794.53	-0.340065	2.8357e-11	1.07045e-09
ENSG00000177602	HASPIN	925.391	-0.396235	2.89066e-11	1.08886e-09
ENSG00000003249	DBNDD1	1418.39	0.461852	2.9006e-11	1.09027e-09
ENSG00000188807	TMEM201	1894.45	-0.395504	3.05393e-11	1.14545e-09
ENSG00000135454	B4GALNT1	433.406	0.645262	3.1688e-11	1.18601e-09
ENSG00000099875	MKNK2	8284.7	0.346381	3.2528e-11	1.21486e-09
ENSG00000084090	STARD7	7725.5	-0.244039	3.3497e-11	1.2484e-09
ENSG00000109576	AADAT	2415.75	-0.410852	3.49934e-11	1.30141e-09
ENSG00000074211	PPP2R2C	547.582	0.449262	3.6718e-11	1.36267e-09
ENSG00000196793	ZNF239	1007.1	-0.381521	3.76229e-11	1.39331e-09
ENSG00000158161	EYA3	2407.4	-0.273063	3.92699e-11	1.45125e-09
ENSG00000109323	MANBA	855.587	0.471365	4.12519e-11	1.5213e-09
ENSG00000189091	SF3B3	12855.7	-0.209504	4.48342e-11	1.64995e-09
ENSG00000137760	ALKBH8	349.665	-0.544812	4.58729e-11	1.68466e-09
ENSG00000136450	SRSF1	9167.74	-0.223783	4.66278e-11	1.70808e-09
ENSG00000147324	MFHAS1	1846.34	-0.299964	4.67049e-11	1.70808e-09
ENSG00000148229	POLE3	3914.86	-0.380874	5.60546e-11	2.04576e-09
ENSG00000164938	TP53INP1	7497.65	0.603865	5.6502e-11	2.05782e-09
ENSG00000132326	PER2	1429.38	-0.389714	5.66903e-11	2.06041e-09
ENSG00000102554	KLF5	168.951	-0.862941	5.88765e-11	2.13546e-09
ENSG00000135269	TES	1878.18	0.343218	6.02238e-11	2.17983e-09
ENSG00000111837	MAK	110.577	-0.988721	6.11007e-11	2.20703e-09
ENSG00000125630	POLR1B	2467.54	-0.358673	6.53632e-11	2.35616e-09
ENSG00000144339	TMEFF2	1729.08	-0.349105	7.1189e-11	2.56091e-09
ENSG00000138780	GSTCD	1108.42	-0.402207	7.23555e-11	2.59756e-09
ENSG00000136436	CALCOCO2	2234.82	0.266095	7.53586e-11	2.69987e-09
ENSG00000162063	CCNF	1906.05	-0.418033	7.64166e-11	2.7322e-09
ENSG00000164611	PTTG1	2047.65	-0.445031	7.82661e-11	2.79265e-09
ENSG00000211584	SLC48A1	925.112	0.432579	8.95779e-11	3.18981e-09
ENSG00000123240	OPTN	142.538	0.968452	9.39523e-11	3.33882e-09
ENSG00000198496	NBR2	493.509	0.565039	9.77843e-11	3.46799e-09
ENSG00000169213	RAB3B	4197.35	-0.313277	1.03578e-10	3.66609e-09
ENSG00000189221	MAOA	17356.5	-0.2668	1.05675e-10	3.7328e-09
ENSG00000116761	CTH	313.293	0.621644	1.09962e-10	3.87382e-09
ENSG00000148606	POLR3A	3381.4	-0.219298	1.10108e-10	3.87382e-09
ENSG00000184489	PTP4A3	220.766	0.717666	1.12957e-10	3.9661e-09
ENSG00000155016	CYP2U1	645.22	-0.519157	1.13812e-10	3.98819e-09
ENSG00000141664	ZCCHC2	1929.51	-0.332392	1.14542e-10	4.00012e-09
ENSG00000160211	G6PD	1813.57	0.402719	1.14607e-10	4.00012e-09
ENSG00000169813	HNRNPF	13310	-0.278502	1.16971e-10	4.07453e-09
ENSG00000081803	CADPS2	653.1	-0.457984	1.19372e-10	4.14994e-09
ENSG00000085840	ORC1	1296.23	-0.381992	1.19914e-10	4.16057e-09
ENSG00000157388	CACNA1D	274.641	0.750312	1.27518e-10	4.407e-09
ENSG00000183010	PYCR1	6596.25	0.47151	1.27286e-10	4.407e-09
ENSG00000169504	CLIC4	1970.65	0.570589	1.34239e-10	4.63021e-09
ENSG00000174371	EXO1	1033.28	-0.455123	1.41001e-10	4.85392e-09
ENSG00000075886	TUBA3D	58.8209	-1.36053	1.48774e-10	5.1115e-09
ENSG00000165125	TRPV6	830.403	0.433085	1.57473e-10	5.39982e-09
ENSG00000125780	TGM3	93.6274	1.15121	1.57929e-10	5.40364e-09
ENSG00000180957	PITPNB	879.76	-0.381988	1.58199e-10	5.40364e-09
ENSG00000155629	PIK3AP1	319.405	-0.667235	1.59339e-10	5.43203e-09
ENSG00000130164	LDLR	2595.26	-0.431624	1.60891e-10	5.47435e-09
ENSG00000009694	TENM1	528.581	-0.812121	1.67169e-10	5.67697e-09
ENSG00000129946	SHC2	58.4769	1.36467	1.67675e-10	5.68318e-09
ENSG00000005884	ITGA3	382.614	0.6065	1.74157e-10	5.89154e-09
ENSG00000163811	WDR43	3412.98	-0.370451	1.75582e-10	5.92833e-09
ENSG00000180891	CUEDC1	395.112	0.644033	1.81707e-10	6.12339e-09
ENSG00000151576	QTRT2	1655.45	-0.312238	1.86487e-10	6.27244e-09
ENSG00000108932	SLC16A6	174.619	-0.794825	1.88378e-10	6.31926e-09
ENSG00000136854	STXBP1	1428.04	0.340562	1.88597e-10	6.31926e-09
ENSG00000147224	PRPS1	4182.73	-0.270589	1.93339e-10	6.46583e-09
ENSG00000204387	C6orf48	1215.41	0.514147	2.00715e-10	6.69976e-09
ENSG00000070778	PTPN21	774.608	-0.452046	2.03005e-10	6.76338e-09
ENSG00000174951	FUT1	403.488	0.659313	2.35201e-10	7.82121e-09
ENSG00000117597	UTP25	1333.32	-0.334585	2.37471e-10	7.88179e-09
ENSG00000166971	AKTIP	1467.53	0.394711	2.41028e-10	7.98478e-09
ENSG00000151247	EIF4E	2169.53	-0.361816	2.42054e-10	8.00371e-09
ENSG00000147408	CSGALNACT1	101.598	-1.08652	2.44153e-10	8.05797e-09
ENSG00000110172	CHORDC1	3061.74	-0.41556	2.46321e-10	8.11428e-09
ENSG00000204385	SLC44A4	1079.83	0.437874	2.5216e-10	8.29112e-09
ENSG00000165915	SLC39A13	283.767	0.744685	2.57089e-10	8.43742e-09
ENSG00000213551	DNAJC9	1528.1	-0.346718	2.7999e-10	9.17189e-09
ENSG00000149554	CHEK1	1558.17	-0.411693	2.81811e-10	9.21437e-09
ENSG00000062485	CS	12056	-0.217042	3.14139e-10	1.02524e-08
ENSG00000165271	NOL6	4335.04	-0.326196	3.27426e-10	1.06662e-08
ENSG00000055163	CYFIP2	1987.15	0.332183	3.37576e-10	1.09765e-08
ENSG00000152601	MBNL1	3280.12	-0.416029	3.38655e-10	1.09913e-08
ENSG00000105821	DNAJC2	1173.34	-0.394275	3.47153e-10	1.12463e-08
ENSG00000175274	TP53I11	1531.5	0.437786	3.49e-10	1.12854e-08
ENSG00000115207	GTF3C2	2664.72	-0.31809	3.52573e-10	1.138e-08
ENSG00000135912	TTLL4	1033.17	-0.421176	3.62872e-10	1.1691e-08
ENSG00000112365	ZBTB24	914.476	-0.354745	3.66911e-10	1.17995e-08
ENSG00000129173	E2F8	770.615	-0.437681	3.90537e-10	1.25364e-08
ENSG00000176390	CRLF3	423.177	-0.522795	4.29392e-10	1.37585e-08
ENSG00000145386	CCNA2	1528.53	-0.486588	4.41787e-10	1.413e-08
ENSG00000154920	EME1	664.013	-0.412371	4.73116e-10	1.51045e-08
ENSG00000149243	KLHL35	279.942	0.751536	4.76487e-10	1.51846e-08
ENSG00000088280	ASAP3	420.245	0.631818	4.90908e-10	1.56159e-08
ENSG00000110090	CPT1A	7632.47	-0.30751	4.95988e-10	1.5749e-08
ENSG00000206053	JPT2	9980.91	-0.272841	5.09891e-10	1.61613e-08
ENSG00000104447	TRPS1	1934.64	0.347958	5.52218e-10	1.74713e-08
ENSG00000166046	TCP11L2	162.29	0.785832	5.73049e-10	1.80979e-08
ENSG00000165891	E2F7	762.625	-0.523825	5.79578e-10	1.82712e-08
ENSG00000090661	CERS4	1033.76	0.533374	5.82427e-10	1.83282e-08
ENSG00000198042	MAK16	2657.66	-0.363658	5.91111e-10	1.85683e-08
ENSG00000151150	ANK3	13549.1	0.299881	5.92701e-10	1.8585e-08
ENSG00000117016	RIMS3	146.357	0.848365	6.22155e-10	1.94739e-08
ENSG00000144554	FANCD2	2715.32	-0.332618	6.80346e-10	2.12575e-08
ENSG00000120705	ETF1	6640.97	-0.266164	6.92086e-10	2.1586e-08
ENSG00000169180	XPO6	7263.38	-0.203111	7.00641e-10	2.18141e-08
ENSG00000163918	RFC4	1722.67	-0.335364	7.50152e-10	2.33143e-08
ENSG00000006282	SPATA20	3958.4	0.404506	7.88313e-10	2.44572e-08
ENSG00000120519	SLC10A7	951.012	-0.491526	8.07163e-10	2.49979e-08
ENSG00000120948	TARDBP	5098.42	-0.243974	8.19843e-10	2.5346e-08
ENSG00000116237	ICMT	4889.56	-0.273824	8.48374e-10	2.6182e-08
ENSG00000076248	UNG	2214.27	-0.293955	8.67942e-10	2.6739e-08
ENSG00000166900	STX3	2085.23	0.295787	8.90621e-10	2.73419e-08
ENSG00000175215	CTDSP2	4360.84	0.291221	8.89097e-10	2.73419e-08
ENSG00000150753	CCT5	11387	-0.262183	8.92961e-10	2.7366e-08
ENSG00000143319	ISG20L2	3290.7	-0.304637	9.02313e-10	2.76045e-08
ENSG00000172889	EGFL7	661.516	0.652334	9.479e-10	2.89488e-08
ENSG00000136167	LCP1	2614.48	-0.34984	9.51339e-10	2.90035e-08
ENSG00000130935	NOL11	2881.37	-0.438812	9.70575e-10	2.95387e-08
ENSG00000159259	CHAF1B	1120.43	-0.39839	9.93355e-10	3.01798e-08
ENSG00000012660	ELOVL5	5594.48	-0.400735	1.00639e-09	3.0523e-08
ENSG00000108448	TRIM16L	874.131	0.554086	1.03847e-09	3.14419e-08
ENSG00000134030	CTIF	404.104	0.60396	1.04617e-09	3.16205e-08
ENSG00000160145	KALRN	491.101	0.615847	1.0664e-09	3.21766e-08
ENSG00000104413	ESRP1	2230.34	0.37843	1.07051e-09	3.22454e-08
ENSG00000114491	UMPS	1978.89	-0.36185	1.07718e-09	3.23909e-08
ENSG00000186814	ZSCAN30	568.087	0.527227	1.12853e-09	3.38771e-08
ENSG00000198604	BAZ1A	3777.08	-0.349878	1.13123e-09	3.39002e-08
ENSG00000154978	VOPP1	958.667	0.39341	1.15048e-09	3.44185e-08
ENSG00000125354	2006-09-01	701.7	0.417779	1.16973e-09	3.49351e-08
ENSG00000196470	SIAH1	922.039	0.393432	1.20879e-09	3.60404e-08
ENSG00000150768	DLAT	2687.67	-0.349547	1.27271e-09	3.7882e-08
ENSG00000143819	EPHX1	9066.95	0.385974	1.29567e-09	3.85003e-08
ENSG00000163808	KIF15	1052.69	-0.479398	1.31293e-09	3.89472e-08
ENSG00000172771	EFCAB12	495.03	-0.551723	1.328e-09	3.93281e-08
ENSG00000088756	ARHGAP28	563.217	-0.567305	1.33322e-09	3.94161e-08
ENSG00000005469	CROT	1046.92	-0.530899	1.37653e-09	4.06285e-08
ENSG00000123473	STIL	1673.54	-0.410814	1.38575e-09	4.08321e-08
ENSG00000185633	NDUFA4L2	73.7932	1.20833	1.4022e-09	4.12475e-08
ENSG00000123737	EXOSC9	1223.23	-0.376138	1.40478e-09	4.12545e-08
ENSG00000166391	MOGAT2	37.3085	-1.66781	1.40791e-09	4.12777e-08
ENSG00000164574	GALNT10	2049.96	0.370662	1.45949e-09	4.27188e-08
ENSG00000168140	VASN	1100.72	0.52402	1.47943e-09	4.32304e-08
ENSG00000115414	FN1	10334.8	0.326569	1.49995e-09	4.37574e-08
ENSG00000079616	KIF22	3893.7	-0.431639	1.5176e-09	4.4199e-08
ENSG00000112715	VEGFA	1541.83	0.430349	1.52461e-09	4.43296e-08
ENSG00000172732	MUS81	683.419	0.475017	1.52734e-09	4.43358e-08
ENSG00000113163	COL4A3BP	1469.15	-0.414766	1.64591e-09	4.76988e-08
ENSG00000135372	NAT10	3953.09	-0.244895	1.66314e-09	4.8119e-08
ENSG00000090097	PCBP4	429.874	0.59065	1.67414e-09	4.83577e-08
ENSG00000197712	FAM114A1	1734.92	0.247429	1.73139e-09	4.99294e-08
ENSG00000230234	AL162582.1	356.592	0.532974	1.736e-09	4.99803e-08
ENSG00000149970	CNKSR2	630.914	-0.543014	1.75028e-09	5.03092e-08
ENSG00000119242	CCDC92	463.077	0.514218	1.77499e-09	5.09361e-08
ENSG00000112312	GMNN	1095.92	-0.38875	1.81111e-09	5.1888e-08
ENSG00000269728	NA	273.385	-1.06262	1.91052e-09	5.46472e-08
ENSG00000133315	MACROD1	675.325	0.594533	1.95191e-09	5.57403e-08
ENSG00000204580	DDR1	1994.12	0.427461	1.98418e-09	5.65701e-08
ENSG00000128973	CLN6	1992.15	-0.292754	1.99742e-09	5.68554e-08
ENSG00000132824	SERINC3	4343.98	0.256929	2.14019e-09	6.08209e-08
ENSG00000116991	SIPA1L2	2068.97	-0.269419	2.18737e-09	6.20615e-08
ENSG00000126603	GLIS2	441.625	0.64432	2.22969e-09	6.31602e-08
ENSG00000165716	FAM69B	514.092	0.575653	2.23542e-09	6.32206e-08
ENSG00000183779	ZNF703	1786.46	0.37812	2.32902e-09	6.57622e-08
ENSG00000187193	MT1X	533.6	0.657875	2.34656e-09	6.61511e-08
ENSG00000184381	PLA2G6	1152.9	0.396555	2.53944e-09	7.1474e-08
ENSG00000075539	FRYL	3102.78	-0.531162	2.58618e-09	7.26733e-08
ENSG00000269834	ZNF528-AS1	400.954	0.501108	2.6987e-09	7.57143e-08
ENSG00000160191	PDE9A	1553.43	-0.285635	2.74953e-09	7.70174e-08
ENSG00000096063	SRPK1	3264.44	-0.356289	2.85742e-09	7.99122e-08
ENSG00000112029	FBXO5	861.661	-0.504518	2.94006e-09	8.2093e-08
ENSG00000107537	PHYH	984.416	0.439493	3.10484e-09	8.65566e-08
ENSG00000196374	NA	2986.26	-0.551088	3.14423e-09	8.75161e-08
ENSG00000204514	ZNF814	1382.95	-0.400063	3.24723e-09	9.02402e-08
ENSG00000094880	CDC23	1830.36	-0.319314	3.26904e-09	9.05601e-08
ENSG00000142731	PLK4	885.593	-0.487664	3.26887e-09	9.05601e-08
ENSG00000188483	IER5L	193.436	0.96772	3.28462e-09	9.08486e-08
ENSG00000128050	PAICS	14947.2	-0.287731	3.53895e-09	9.77294e-08
ENSG00000117650	NEK2	866.515	-0.442844	3.57282e-09	9.85101e-08
ENSG00000154153	RETREG1	865.547	0.525993	3.64229e-09	1.00268e-07
ENSG00000182957	SPATA13	1181.66	-0.435358	3.65098e-09	1.00351e-07
ENSG00000165495	PKNOX2	600.524	0.488553	3.72217e-09	1.02148e-07
ENSG00000117139	KDM5B	3767.75	0.233188	3.74917e-09	1.02729e-07
ENSG00000010810	FYN	103.015	1.14821	3.91583e-09	1.07128e-07
ENSG00000164088	PPM1M	158.161	0.889545	3.99699e-09	1.09179e-07
ENSG00000132879	FBXO44	545.04	0.573683	4.08299e-09	1.11355e-07
ENSG00000124762	CDKN1A	5298.46	0.369723	4.09356e-09	1.1147e-07
ENSG00000198125	MB	1088.99	0.46044	4.11884e-09	1.11985e-07
ENSG00000165244	ZNF367	771.448	-0.483282	4.29882e-09	1.16698e-07
ENSG00000072274	TFRC	23427.1	-0.363525	4.35827e-09	1.1813e-07
ENSG00000163754	GYG1	1941.18	-0.313718	4.45953e-09	1.20689e-07
ENSG00000119285	HEATR1	4353.47	-0.374638	4.47111e-09	1.20816e-07
ENSG00000170525	PFKFB3	910.156	-0.418648	4.50742e-09	1.2161e-07
ENSG00000024526	DEPDC1	863.567	-0.898474	4.52948e-09	1.22018e-07
ENSG00000088247	KHSRP	10528.4	-0.264148	4.72166e-09	1.27001e-07
ENSG00000099622	CIRBP	5995.72	0.248406	4.7717e-09	1.28151e-07
ENSG00000139289	PHLDA1	951.208	-0.356272	4.8578e-09	1.30265e-07
ENSG00000213853	EMP2	1393.01	-0.353965	4.88093e-09	1.30685e-07
ENSG00000087470	DNM1L	2893.09	-0.464368	4.91073e-09	1.31284e-07
ENSG00000111581	NUP107	2125.48	-0.321315	4.98362e-09	1.3303e-07
ENSG00000112941	TENT4A	1578.67	-0.282153	5.04373e-09	1.34431e-07
ENSG00000171316	CHD7	1690.93	-0.320949	5.07368e-09	1.35024e-07
ENSG00000131467	PSME3	7178.14	-0.205789	5.24771e-09	1.39445e-07
ENSG00000168734	PKIG	471.207	0.667769	5.25788e-09	1.39504e-07
ENSG00000171388	APLN	617.606	-0.495867	5.29377e-09	1.40245e-07
ENSG00000166411	IDH3A	1818.77	-0.281552	5.43326e-09	1.43724e-07
ENSG00000148700	ADD3	3470.89	0.33368	5.90014e-09	1.5584e-07
ENSG00000152503	TRIM36	955.566	-0.510838	6.13739e-09	1.61863e-07
ENSG00000149179	C11orf49	689.526	0.423784	6.33787e-09	1.66901e-07
ENSG00000170385	SLC30A1	1088.74	0.537496	6.34818e-09	1.66922e-07
ENSG00000154122	ANKH	3082.32	-0.239199	6.37445e-09	1.67362e-07
ENSG00000204128	C2orf72	202.984	-0.839923	6.63439e-09	1.73928e-07
ENSG00000165490	DDIAS	767.33	-0.72466	6.68324e-09	1.74429e-07
ENSG00000167608	TMC4	636.762	0.492189	6.6757e-09	1.74429e-07
ENSG00000172379	ARNT2	551.922	0.454518	6.67409e-09	1.74429e-07
ENSG00000173334	TRIB1	763.069	0.450615	7.14939e-09	1.86318e-07
ENSG00000086200	IPO11	1425.19	-0.438973	7.2853e-09	1.8958e-07
ENSG00000116661	FBXO2	182.144	0.91581	7.5928e-09	1.9729e-07
ENSG00000136628	EPRS	12973.7	0.330329	7.74624e-09	2.0098e-07
ENSG00000138764	CCNG2	1623.95	0.617027	8.03627e-09	2.08198e-07
ENSG00000013810	TACC3	4098.15	-0.456293	8.64274e-09	2.2358e-07
ENSG00000101057	MYBL2	4904.06	-0.369778	8.96497e-09	2.31575e-07
ENSG00000110697	PITPNM1	570.662	0.611415	9.11986e-09	2.35231e-07
ENSG00000123975	CKS2	2807.29	-0.428076	9.59533e-09	2.47094e-07
ENSG00000143502	SUSD4	168.067	0.795462	9.60788e-09	2.47094e-07
ENSG00000186871	ERCC6L	894.315	-0.449591	9.6962e-09	2.49001e-07
ENSG00000164109	MAD2L1	1300.69	-0.579498	9.74198e-09	2.49812e-07
ENSG00000064309	CDON	637.056	0.432713	9.86891e-09	2.52699e-07
ENSG00000100439	ABHD4	2085.58	0.416742	9.89451e-09	2.52986e-07
ENSG00000105792	CFAP69	815.207	0.696726	1.00763e-08	2.5726e-07
ENSG00000180806	HOXC9	182.066	0.706186	1.09761e-08	2.79827e-07
ENSG00000101367	MAPRE1	3800.6	-0.273826	1.10773e-08	2.81591e-07
ENSG00000125944	HNRNPR	5339.8	-0.234515	1.10708e-08	2.81591e-07
ENSG00000064419	TNPO3	3591.72	-0.215392	1.11418e-08	2.82822e-07
ENSG00000144231	POLR2D	1393.96	-0.307124	1.13238e-08	2.87028e-07
ENSG00000181852	RNF41	4264.51	0.250049	1.13522e-08	2.87333e-07
ENSG00000109906	ZBTB16	1952.43	-0.622765	1.14782e-08	2.90106e-07
ENSG00000090861	AARS	13982.4	0.494453	1.16788e-08	2.94752e-07
ENSG00000104643	MTMR9	1401.77	-0.437469	1.19361e-08	3.00814e-07
ENSG00000140598	EFL1	1132.31	0.304165	1.20219e-08	3.02542e-07
ENSG00000113649	TCERG1	2864.19	-0.331843	1.25023e-08	3.14183e-07
ENSG00000141756	FKBP10	2098.71	0.289461	1.25498e-08	3.14926e-07
ENSG00000164024	METAP1	1982.76	-0.361554	1.28941e-08	3.23105e-07
ENSG00000159128	IFNGR2	432.428	0.505623	1.29978e-08	3.25241e-07
ENSG00000105707	HPN	1952.33	0.416959	1.3113e-08	3.27658e-07
ENSG00000144115	THNSL2	1678.05	0.325308	1.33186e-08	3.32321e-07
ENSG00000149532	CPSF7	4580.69	-0.256079	1.35114e-08	3.36656e-07
ENSG00000128829	EIF2AK4	5122.57	-0.209291	1.37431e-08	3.41945e-07
ENSG00000141385	AFG3L2	4760.23	-0.211056	1.3809e-08	3.431e-07
ENSG00000113594	LIFR	1317.51	-0.607171	1.38966e-08	3.44789e-07
ENSG00000065150	IPO5	6644.72	-0.293763	1.41954e-08	3.51225e-07
ENSG00000197275	RAD54B	231.425	-0.656694	1.41959e-08	3.51225e-07
ENSG00000166444	ST5	430.771	0.558426	1.43952e-08	3.55655e-07
ENSG00000179918	SEPHS2	3321.82	0.294554	1.45263e-08	3.58391e-07
ENSG00000140650	PMM2	1259.57	-0.287361	1.48709e-08	3.66378e-07
ENSG00000224689	ZNF812P	131.839	-0.837608	1.49851e-08	3.68677e-07
ENSG00000110400	NECTIN1	2341.73	-0.39731	1.52936e-08	3.7574e-07
ENSG00000126883	NUP214	3941.2	-0.259129	1.55827e-08	3.82308e-07
ENSG00000185634	SHC4	56.7347	1.24977	1.6231e-08	3.97659e-07
ENSG00000111653	ING4	431.419	0.525204	1.64338e-08	4.02069e-07
ENSG00000113569	NUP155	5848.62	-0.397283	1.6499e-08	4.02543e-07
ENSG00000158169	FANCC	1041.51	-0.320777	1.64969e-08	4.02543e-07
ENSG00000149932	TMEM219	1303.64	0.432108	1.67064e-08	4.07039e-07
ENSG00000181444	ZNF467	542.023	0.586414	1.68143e-08	4.09101e-07
ENSG00000158856	DMTN	736.318	0.516356	1.71736e-08	4.17265e-07
ENSG00000012963	UBR7	1803.61	-0.327683	1.75549e-08	4.25942e-07
ENSG00000140450	ARRDC4	363.632	-0.544327	1.82336e-08	4.418e-07
ENSG00000175161	CADM2	78.6966	-1.01542	1.83148e-08	4.43159e-07
ENSG00000136824	SMC2	2232.97	-0.494626	1.83521e-08	4.4345e-07
ENSG00000112146	FBXO9	1544.78	0.284125	1.89011e-08	4.55715e-07
ENSG00000147274	RBMX	8200.36	-0.264184	1.89374e-08	4.55715e-07
ENSG00000148019	CEP78	2025.03	-0.359841	1.89186e-08	4.55715e-07
ENSG00000164010	ERMAP	389.226	0.525076	1.9375e-08	4.65608e-07
ENSG00000108669	CYTH1	1313.44	-0.297538	1.99966e-08	4.79891e-07
ENSG00000183762	KREMEN1	1131.06	0.324656	2.05063e-08	4.91453e-07
ENSG00000131747	TOP2A	6483.02	-0.438852	2.08054e-08	4.97265e-07
ENSG00000235314	LINC00957	181.822	0.661691	2.07866e-08	4.97265e-07
ENSG00000170312	CDK1	7085.85	-0.506501	2.09576e-08	5.00224e-07
ENSG00000247626	MARS2	1484.23	-0.331735	2.11981e-08	5.0528e-07
ENSG00000107779	BMPR1A	1072.04	-0.337992	2.13872e-08	5.09096e-07
ENSG00000110851	PRDM4	1537.58	0.269481	2.18833e-08	5.20201e-07
ENSG00000110011	DNAJC4	674.29	0.582399	2.20948e-08	5.24522e-07
ENSG00000073111	MCM2	6740.72	-0.450251	2.25839e-08	5.35409e-07
ENSG00000105136	ZNF419	769.457	0.383499	2.26224e-08	5.35599e-07
ENSG00000196230	TUBB	9073.88	-0.319613	2.32235e-08	5.49091e-07
ENSG00000117724	CENPF	6875.18	-0.43653	2.34102e-08	5.52765e-07
ENSG00000072571	HMMR	2151.13	-0.635152	2.35951e-08	5.56384e-07
ENSG00000042445	RETSAT	1714.52	0.283062	2.39022e-08	5.62869e-07
ENSG00000126216	TUBGCP3	1803.81	-0.255033	2.50002e-08	5.87243e-07
ENSG00000132646	PCNA	4786.21	-0.336696	2.5004e-08	5.87243e-07
ENSG00000088826	SMOX	115.907	0.887664	2.57227e-08	6.03317e-07
ENSG00000138771	SHROOM3	7714.3	-0.229503	2.6263e-08	6.1517e-07
ENSG00000157212	PAXIP1	1422.15	-0.306421	2.64363e-08	6.18406e-07
ENSG00000005187	ACSM3	739.47	-0.423267	2.68553e-08	6.27372e-07
ENSG00000166881	NEMP1	1812.95	-0.382262	2.78385e-08	6.4948e-07
ENSG00000145687	SSBP2	420.648	0.477958	2.79886e-08	6.52116e-07
ENSG00000076242	MLH1	2565.2	-0.284615	2.83516e-08	6.59699e-07
ENSG00000006327	TNFRSF12A	284.1	0.776489	2.87643e-08	6.68418e-07
ENSG00000162613	FUBP1	5989.3	-0.219062	2.88335e-08	6.69143e-07
ENSG00000086827	ZW10	1207.99	-0.373874	2.92502e-08	6.77027e-07
ENSG00000151715	TMEM45B	112.948	0.833837	2.92183e-08	6.77027e-07
ENSG00000126432	PRDX5	3725.4	0.60346	2.96472e-08	6.85314e-07
ENSG00000234432	AC092171.3	246.681	0.7158	2.98876e-08	6.89965e-07
ENSG00000107957	SH3PXD2A	80.3813	1.00659	3.01126e-08	6.94246e-07
ENSG00000149541	B3GAT3	1125.09	0.441489	3.01701e-08	6.94662e-07
ENSG00000173226	IQCB1	838.924	-0.403004	3.09731e-08	7.12219e-07
ENSG00000100335	MIEF1	3875.09	-0.224932	3.10671e-08	7.12518e-07
ENSG00000134001	EIF2S1	5321.9	-0.321001	3.10271e-08	7.12518e-07
ENSG00000159176	CSRP1	4815.53	0.356517	3.11929e-08	7.14472e-07
ENSG00000109171	SLAIN2	2449.71	-0.303204	3.1928e-08	7.30359e-07
ENSG00000214530	STARD10	1161.98	0.477066	3.30817e-08	7.55767e-07
ENSG00000152377	SPOCK1	38.3677	-1.54748	3.39562e-08	7.74739e-07
ENSG00000166508	MCM7	8799.99	-0.32335	3.45516e-08	7.87303e-07
ENSG00000183647	ZNF530	474.371	-0.419308	3.49857e-08	7.96163e-07
ENSG00000186416	NKRF	1043.13	-0.313534	3.58276e-08	8.14268e-07
ENSG00000143412	ANXA9	185.819	0.722226	3.6488e-08	8.28207e-07
ENSG00000125826	RBCK1	3289.37	0.424846	3.66696e-08	8.31255e-07
ENSG00000060237	WNK1	12083.1	-0.22553	3.71321e-08	8.40658e-07
ENSG00000131153	GINS2	1024.68	-0.395543	3.80671e-08	8.60717e-07
ENSG00000153107	ANAPC1	2491.31	-0.353094	3.85068e-08	8.69541e-07
ENSG00000140396	NCOA2	4051.5	0.236342	3.92478e-08	8.85139e-07
ENSG00000115993	TRAK2	2181.18	0.311205	3.9904e-08	8.98005e-07
ENSG00000184445	KNTC1	3063.28	-0.525104	3.99204e-08	8.98005e-07
ENSG00000164466	SFXN1	4237.29	-0.289351	4.00676e-08	8.98311e-07
ENSG00000165732	DDX21	11610.2	-0.337238	3.99994e-08	8.98311e-07
ENSG00000174840	PDE12	2557.88	-0.272896	4.00872e-08	8.98311e-07
ENSG00000170454	KRT75	9.5756	3.67146	4.18063e-08	9.35642e-07
ENSG00000159140	SON	15762.1	-0.17977	4.409e-08	9.85498e-07
ENSG00000123352	SPATS2	1641.44	0.260163	4.46841e-08	9.96509e-07
ENSG00000139211	AMIGO2	74.5972	1.29278	4.46959e-08	9.96509e-07
ENSG00000132763	MMACHC	1294.11	-0.377394	4.48224e-08	9.98063e-07
ENSG00000043355	ZIC2	917.613	0.345327	4.48841e-08	9.98174e-07
ENSG00000006634	DBF4	941.393	-0.649783	4.58754e-08	1.01893e-06
ENSG00000213585	VDAC1	12087.8	-0.207186	4.60066e-08	1.02056e-06
ENSG00000068903	SIRT2	1573.94	0.360299	4.64609e-08	1.02934e-06
ENSG00000159082	SYNJ1	763.102	-0.526875	4.68108e-08	1.03578e-06
ENSG00000151725	CENPU	1795.65	-0.466111	4.70666e-08	1.04014e-06
ENSG00000124207	CSE1L	8396.9	-0.578442	4.75505e-08	1.04951e-06
ENSG00000175063	UBE2C	2408.96	-0.415008	4.76134e-08	1.04958e-06
ENSG00000172183	ISG20	311.988	0.627693	4.83306e-08	1.06406e-06
ENSG00000198816	ZNF358	720.059	0.725357	4.84587e-08	1.06555e-06
ENSG00000224536	AC096677.1	66.5628	1.01962	4.94524e-08	1.08604e-06
ENSG00000143179	UCK2	3330.38	-0.25591	4.99161e-08	1.09485e-06
ENSG00000159131	GART	3841.02	-0.257669	5.08814e-08	1.11464e-06
ENSG00000111602	TIMELESS	3487.06	-0.288905	5.2726e-08	1.15361e-06
ENSG00000137266	SLC22A23	1767.94	0.309084	5.32774e-08	1.16423e-06
ENSG00000039139	DNAH5	645.23	-0.460346	5.39274e-08	1.17697e-06
ENSG00000165494	PCF11	3000.83	-0.274576	5.4148e-08	1.18032e-06
ENSG00000124784	RIOK1	613.701	-0.444817	5.66727e-08	1.23382e-06
ENSG00000163002	NUP35	652.111	-0.401954	5.74392e-08	1.24897e-06
ENSG00000113460	BRIX1	1688.2	-0.49336	5.79411e-08	1.25832e-06
ENSG00000072134	EPN2	2235.48	-0.246149	6.05349e-08	1.31303e-06
ENSG00000134698	AGO4	1236.22	0.307946	6.11939e-08	1.32569e-06
ENSG00000197653	DNAH10	45.7338	1.28298	6.18166e-08	1.33753e-06
ENSG00000125450	NUP85	2020	-0.266864	6.20137e-08	1.34015e-06
ENSG00000163993	S100P	127.546	1.01702	6.28022e-08	1.35553e-06
ENSG00000175471	MCTP1	87.1632	0.996858	6.30379e-08	1.35895e-06
ENSG00000126787	DLGAP5	2018.23	-0.578938	6.46851e-08	1.39275e-06
ENSG00000117632	STMN1	4294.74	-0.281945	6.52377e-08	1.40293e-06
ENSG00000197451	HNRNPAB	5457.81	-0.353943	6.66513e-08	1.43158e-06
ENSG00000035928	RFC1	4019.87	-0.290477	6.90389e-08	1.48105e-06
ENSG00000134697	GNL2	4446.38	-0.27886	6.94583e-08	1.48824e-06
ENSG00000105204	DYRK1B	869.704	0.44359	6.97258e-08	1.49215e-06
ENSG00000135476	ESPL1	1627.99	-0.28737	7.06679e-08	1.50864e-06
ENSG00000165029	ABCA1	106.722	1.01402	7.06512e-08	1.50864e-06
ENSG00000131368	MRPS25	2932.99	-0.247216	7.0847e-08	1.51063e-06
ENSG00000108947	EFNB3	60.6778	1.15883	7.37163e-08	1.56991e-06
ENSG00000150961	SEC24D	1070.13	0.377877	7.44102e-08	1.58277e-06
ENSG00000164338	UTP15	1383.43	-0.437946	7.65684e-08	1.62671e-06
ENSG00000164300	SERINC5	3050.93	-0.238008	7.76656e-08	1.64803e-06
ENSG00000162576	MXRA8	505.345	0.593395	7.7879e-08	1.65057e-06
ENSG00000181885	CLDN7	4239.95	0.336795	7.85147e-08	1.66004e-06
ENSG00000188554	NBR1	3963.16	0.21811	7.85113e-08	1.66004e-06
ENSG00000108651	UTP6	2139.96	-0.26544	8.04633e-08	1.6992e-06
ENSG00000164754	RAD21	7106.53	-0.34037	8.1045e-08	1.70943e-06
ENSG00000051341	POLQ	2224.76	-0.427952	8.1575e-08	1.7184e-06
ENSG00000130699	TAF4	963.614	-0.360166	8.16656e-08	1.7184e-06
ENSG00000237945	LINC00649	175.377	0.620669	8.27753e-08	1.73966e-06
ENSG00000136828	RALGPS1	566.295	0.39855	8.31427e-08	1.7453e-06
ENSG00000040275	SPDL1	1132.7	-0.46468	8.59093e-08	1.80123e-06
ENSG00000168575	SLC20A2	1252.3	0.29186	8.76328e-08	1.83518e-06
ENSG00000127152	BCL11B	46.5826	1.24729	8.7829e-08	1.8371e-06
ENSG00000111674	ENO2	238.099	0.715229	9.44875e-08	1.97402e-06
ENSG00000143878	RHOB	2577.45	0.280809	9.54165e-08	1.99107e-06
ENSG00000198805	PNP	3333.84	-0.325076	9.57077e-08	1.99478e-06
ENSG00000104067	TJP1	12083.8	-0.180747	9.60827e-08	2.00023e-06
ENSG00000142197	DOP1B	1855.39	0.254478	9.63761e-08	2.00396e-06
ENSG00000143569	UBAP2L	8825.76	-0.237854	9.6675e-08	2.0078e-06
ENSG00000124664	SPDEF	2532.1	-0.373657	9.84076e-08	2.04138e-06
ENSG00000213390	ARHGAP19	1474.31	-0.332105	1.01494e-07	2.10293e-06
ENSG00000162645	GBP2	43.9197	1.31186	1.0187e-07	2.10576e-06
ENSG00000185133	INPP5J	450.714	0.509883	1.01781e-07	2.10576e-06
ENSG00000148688	RPP30	941.102	-0.403734	1.05136e-07	2.17071e-06
ENSG00000111679	PTPN6	689.503	0.416595	1.06419e-07	2.19462e-06
ENSG00000106344	RBM28	2401.98	-0.303986	1.09216e-07	2.24967e-06
ENSG00000136261	BZW2	2825.27	-0.296908	1.1209e-07	2.30617e-06
ENSG00000174132	FAM174A	456.104	0.477012	1.14123e-07	2.34526e-06
ENSG00000149212	SESN3	4549.3	0.635966	1.15024e-07	2.36101e-06
ENSG00000132603	NIP7	1678.67	-0.320665	1.16825e-07	2.39244e-06
ENSG00000186638	KIF24	791.773	-0.3905	1.16827e-07	2.39244e-06
ENSG00000129484	PARP2	1620.24	-0.303227	1.18508e-07	2.42404e-06
ENSG00000077514	POLD3	1120.46	-0.367472	1.19055e-07	2.4324e-06
ENSG00000145041	DCAF1	1058.55	-0.277871	1.23039e-07	2.51088e-06
ENSG00000156398	SFXN2	1926.66	-0.246088	1.23343e-07	2.51417e-06
ENSG00000181467	RAP2B	1803.01	0.289991	1.26808e-07	2.58181e-06
ENSG00000143398	PIP5K1A	4095.64	-0.182728	1.27234e-07	2.58748e-06
ENSG00000111196	MAGOHB	726.504	-0.400303	1.2796e-07	2.59659e-06
ENSG00000186868	MAPT	540.428	0.495641	1.27977e-07	2.59659e-06
ENSG00000116117	PARD3B	544.772	0.415895	1.30805e-07	2.65091e-06
ENSG00000102699	PARP4	2337.89	0.253165	1.31373e-07	2.65864e-06
ENSG00000186212	SOWAHB	614.843	0.437768	1.31489e-07	2.65864e-06
ENSG00000117984	CTSD	2438.54	0.427031	1.32046e-07	2.66379e-06
ENSG00000187840	EIF4EBP1	3508.87	0.526153	1.31926e-07	2.66379e-06
ENSG00000152795	HNRNPDL	5183.5	-0.237455	1.36389e-07	2.74824e-06
ENSG00000221890	NPTXR	1309.4	0.385236	1.44344e-07	2.90521e-06
ENSG00000087086	FTL	6400.68	0.511805	1.47267e-07	2.96067e-06
ENSG00000106261	ZKSCAN1	7082.92	0.2383	1.48359e-07	2.9792e-06
ENSG00000002587	HS3ST1	340.13	0.503171	1.49435e-07	2.9974e-06
ENSG00000132746	ALDH3B2	696.295	0.427319	1.49941e-07	3.00411e-06
ENSG00000128266	GNAZ	960.937	0.373466	1.50264e-07	3.00715e-06
ENSG00000075702	WDR62	1096.7	-0.321475	1.56911e-07	3.13661e-06
ENSG00000102226	USP11	1208.92	0.371046	1.58694e-07	3.16865e-06
ENSG00000058600	POLR3E	2005.5	-0.3279	1.60903e-07	3.20913e-06
ENSG00000142945	KIF2C	1889.73	-0.303156	1.65379e-07	3.29466e-06
ENSG00000153827	TRIP12	6775.46	-0.220173	1.66599e-07	3.3152e-06
ENSG00000080824	HSP90AA1	61549.8	-0.315251	1.68448e-07	3.34821e-06
ENSG00000196549	MME	30322.9	0.308721	1.69491e-07	3.36514e-06
ENSG00000154447	SH3RF1	3622.17	-0.248074	1.71173e-07	3.3947e-06
ENSG00000109519	GRPEL1	2803.38	-0.290322	1.71674e-07	3.4008e-06
ENSG00000174013	FBXO45	1793.14	-0.39783	1.75039e-07	3.46357e-06
ENSG00000114796	KLHL24	1033.18	0.457466	1.75323e-07	3.46528e-06
ENSG00000006756	ARSD	1176.21	0.328459	1.75991e-07	3.47459e-06
ENSG00000014138	POLA2	1743.4	-0.273665	1.78964e-07	3.52933e-06
ENSG00000272106	AL691432.2	449.029	0.498869	1.83827e-07	3.62117e-06
ENSG00000164713	BRI3	1646.8	0.346748	1.86301e-07	3.66579e-06
ENSG00000130816	DNMT1	7748.75	-0.376358	1.92874e-07	3.79089e-06
ENSG00000109685	NSD2	7914.87	-0.235278	1.9311e-07	3.79129e-06
ENSG00000173706	HEG1	231.527	0.577787	1.94184e-07	3.80812e-06
ENSG00000172365	OR5B2	28.0876	-1.63121	1.97341e-07	3.86572e-06
ENSG00000066135	KDM4A	2965.1	0.353666	1.97961e-07	3.87356e-06
ENSG00000146477	SLC22A3	9494.18	0.205447	1.99426e-07	3.8979e-06
ENSG00000127585	FBXL16	817.608	0.433615	2.00127e-07	3.90725e-06
ENSG00000058804	NDC1	3288.2	-0.521367	2.01253e-07	3.92488e-06
ENSG00000104885	DOT1L	3714.13	-0.394446	2.0198e-07	3.93469e-06
ENSG00000164818	DNAAF5	2052.63	-0.282775	2.04533e-07	3.98002e-06
ENSG00000234745	HLA-B	140.021	0.719741	2.09785e-07	4.07771e-06
ENSG00000136490	LIMD2	67.3147	1.1047	2.13636e-07	4.14799e-06
ENSG00000132466	ANKRD17	9057.54	-0.230584	2.14211e-07	4.15456e-06
ENSG00000116120	FARSB	3785.58	-0.3608	2.15335e-07	4.17176e-06
ENSG00000068745	IP6K2	3679.45	0.234256	2.16147e-07	4.18289e-06
ENSG00000165119	HNRNPK	24555.2	-0.207196	2.16863e-07	4.18753e-06
ENSG00000197798	FAM118B	730.053	-0.326682	2.16772e-07	4.18753e-06
ENSG00000069974	RAB27A	463.128	-0.423207	2.17899e-07	4.20292e-06
ENSG00000173531	MST1	112.567	0.81377	2.209e-07	4.25613e-06
ENSG00000009335	UBE3C	7087.72	-0.194153	2.2159e-07	4.26477e-06
ENSG00000198380	GFPT1	3399.95	0.256124	2.2247e-07	4.27702e-06
ENSG00000155100	OTUD6B	802.679	-0.431949	2.24033e-07	4.30236e-06
ENSG00000006740	ARHGAP44	862.044	0.336176	2.26716e-07	4.34915e-06
ENSG00000099250	NRP1	4399.8	-0.234209	2.27133e-07	4.35018e-06
ENSG00000203760	CENPW	463.352	-0.436036	2.27265e-07	4.35018e-06
ENSG00000155792	DEPTOR	294.123	0.50372	2.33508e-07	4.46483e-06
ENSG00000059804	SLC2A3	17.9438	-2.13311	2.38029e-07	4.54141e-06
ENSG00000172115	CYCS	7218.58	-0.389357	2.37929e-07	4.54141e-06
ENSG00000108479	GALK1	440.577	0.579554	2.38622e-07	4.54777e-06
ENSG00000123989	CHPF	1030.19	0.50271	2.40348e-07	4.57571e-06
ENSG00000122966	CIT	1917.5	-0.397373	2.41533e-07	4.59331e-06
ENSG00000100888	CHD8	6253.36	-0.199816	2.43274e-07	4.62141e-06
ENSG00000134440	NARS	7597.46	0.228274	2.44275e-07	4.63544e-06
ENSG00000139514	SLC7A1	9450.05	0.229093	2.46197e-07	4.66687e-06
ENSG00000184702	2005-09-01	988.179	0.437609	2.48777e-07	4.7107e-06
ENSG00000017427	IGF1	184.261	-0.669036	2.50321e-07	4.72493e-06
ENSG00000080986	NDC80	1624.89	-0.491895	2.49863e-07	4.72493e-06
ENSG00000141076	UTP4	2423.75	-0.286852	2.50455e-07	4.72493e-06
ENSG00000196620	UGT2B15	718.628	0.496071	2.50603e-07	4.72493e-06
ENSG00000179222	MAGED1	2727.44	0.241362	2.51669e-07	4.73994e-06
ENSG00000166562	SEC11C	2278.2	0.327338	2.55372e-07	4.80454e-06
ENSG00000137872	SEMA6D	38.592	-1.39335	2.57889e-07	4.84672e-06
ENSG00000126215	XRCC3	1499.61	-0.383621	2.63568e-07	4.94815e-06
ENSG00000188372	ZP3	553.606	0.439846	2.66394e-07	4.99589e-06
ENSG00000184117	NIPSNAP1	4200.14	0.313745	2.70797e-07	5.07305e-06
ENSG00000023330	ALAS1	2609.57	0.246459	2.72404e-07	5.09772e-06
ENSG00000149136	SSRP1	9610.43	-0.267341	2.76661e-07	5.17189e-06
ENSG00000168066	SF1	9822.1	-0.212904	2.85213e-07	5.3261e-06
ENSG00000124104	SNX21	240.165	0.59298	2.90824e-07	5.42511e-06
ENSG00000198624	CCDC69	184.228	0.615363	2.92141e-07	5.4439e-06
ENSG00000103342	GSPT1	9930.9	-0.245435	2.94175e-07	5.47602e-06
ENSG00000114923	SLC4A3	106.933	0.922225	2.95525e-07	5.49533e-06
ENSG00000114738	MAPKAPK3	2143.28	0.293754	2.99335e-07	5.5603e-06
ENSG00000132780	NASP	5145.76	-0.394099	2.99777e-07	5.56263e-06
ENSG00000123485	HJURP	2283.53	-0.267572	3.08143e-07	5.71185e-06
ENSG00000166741	NNMT	146.12	-0.766723	3.30382e-07	6.11764e-06
ENSG00000213699	SLC35F6	1748.71	0.238222	3.31056e-07	6.12366e-06
ENSG00000143079	CTTNBP2NL	1217.36	0.258192	3.34018e-07	6.17197e-06
ENSG00000165175	MID1IP1	3814.62	0.277526	3.35804e-07	6.19846e-06
ENSG00000253729	PRKDC	27003.3	-0.304077	3.38075e-07	6.23383e-06
ENSG00000147852	VLDLR	474.306	0.441957	3.49269e-07	6.4335e-06
ENSG00000196313	POM121	1284.47	-0.292712	3.54742e-07	6.52747e-06
ENSG00000174136	RGMB	2281.98	0.237458	3.6197e-07	6.65352e-06
ENSG00000116161	CACYBP	3273.38	-0.317915	3.62577e-07	6.65772e-06
ENSG00000100271	TTLL1	385.295	0.507056	3.65499e-07	6.70438e-06
ENSG00000065882	TBC1D1	3072.95	-0.217427	3.66403e-07	6.71395e-06
ENSG00000205531	NAP1L4	5080.52	-0.162559	3.67216e-07	6.72185e-06
ENSG00000155158	TTC39B	442.878	0.50012	3.7118e-07	6.78734e-06
ENSG00000101407	TTI1	1245.2	-0.270079	3.72104e-07	6.79719e-06
ENSG00000142765	SYTL1	604.518	0.439857	3.75972e-07	6.8607e-06
ENSG00000198431	TXNRD1	14538.7	0.234065	3.76695e-07	6.86678e-06
ENSG00000155256	ZFYVE27	830.558	0.359365	3.81092e-07	6.93974e-06
ENSG00000138162	TACC2	2594.44	0.502142	3.82333e-07	6.95514e-06
ENSG00000011376	LARS2	3270.58	-0.210915	3.97963e-07	7.232e-06
ENSG00000112118	MCM3	2899.67	-0.256884	3.99182e-07	7.23919e-06
ENSG00000196584	XRCC2	1067.03	-0.473234	3.9902e-07	7.23919e-06
ENSG00000138798	EGF	188.412	0.576309	4.0123e-07	7.26884e-06
ENSG00000135404	CD63	3783.21	0.478692	4.0195e-07	7.27438e-06
ENSG00000110435	PDHX	2499.75	-0.203124	4.02754e-07	7.28145e-06
ENSG00000156504	FAM122B	1018.07	-0.423578	4.08688e-07	7.38114e-06
ENSG00000067334	DNTTIP2	2551.09	-0.335816	4.10427e-07	7.39256e-06
ENSG00000110931	CAMKK2	2484.5	-0.233009	4.10581e-07	7.39256e-06
ENSG00000118007	STAG1	1115.28	-0.347028	4.10202e-07	7.39256e-06
ENSG00000105011	ASF1B	1791.67	-0.330155	4.33749e-07	7.80172e-06
ENSG00000173812	EIF1	16173.5	0.191978	4.39571e-07	7.89837e-06
ENSG00000138757	G3BP2	7563.88	-0.38455	4.42071e-07	7.92725e-06
ENSG00000167543	TP53I13	523.628	0.604066	4.4208e-07	7.92725e-06
ENSG00000152518	ZFP36L2	827.801	-0.3614	4.43067e-07	7.92878e-06
ENSG00000185386	MAPK11	218.191	0.697328	4.42908e-07	7.92878e-06
ENSG00000110321	EIF4G2	41965	-0.185721	4.58464e-07	8.19597e-06
ENSG00000186591	UBE2H	3846.24	0.179193	4.62667e-07	8.26272e-06
ENSG00000151090	THRB	2530.81	-0.286819	4.65004e-07	8.29602e-06
ENSG00000166949	SMAD3	433.163	0.451023	4.67381e-07	8.32999e-06
ENSG00000148110	MFSD14B	3044.43	-0.295505	4.6869e-07	8.34486e-06
ENSG00000103479	RBL2	3699.28	0.260622	4.82694e-07	8.58552e-06
ENSG00000004864	SLC25A13	1497.19	-0.313802	4.84721e-07	8.61286e-06
ENSG00000162385	MAGOH	860.372	-0.361492	4.86376e-07	8.63354e-06
ENSG00000078070	MCCC1	4215.14	0.202547	4.88663e-07	8.6654e-06
ENSG00000136897	MRPL50	1262.13	-0.341192	5.04288e-07	8.93346e-06
ENSG00000221926	TRIM16	881.007	0.30887	5.05062e-07	8.93818e-06
ENSG00000132122	SPATA6	224.886	0.594075	5.15627e-07	9.11598e-06
ENSG00000089351	GRAMD1A	1589.3	0.340784	5.20724e-07	9.19684e-06
ENSG00000109736	MFSD10	549.96	0.463316	5.2385e-07	9.24277e-06
ENSG00000163781	TOPBP1	2766.76	-0.331439	5.2554e-07	9.26331e-06
ENSG00000070961	ATP2B1	5208.23	0.400131	5.29862e-07	9.33013e-06
ENSG00000128245	YWHAH	2076.33	-0.24439	5.32543e-07	9.36796e-06
ENSG00000166313	APBB1	432.136	0.48017	5.3593e-07	9.41812e-06
ENSG00000108883	EFTUD2	4926.6	-0.235359	5.37011e-07	9.42771e-06
ENSG00000130348	QRSL1	834.031	-0.324662	5.40091e-07	9.47232e-06
ENSG00000106541	AGR2	306.581	-0.592451	5.46078e-07	9.56778e-06
ENSG00000143061	IGSF3	526.559	0.484079	5.49323e-07	9.61507e-06
ENSG00000103194	USP10	4012.77	-0.189318	5.52264e-07	9.65693e-06
ENSG00000135451	TROAP	1318.67	-0.441609	5.60607e-07	9.79309e-06
ENSG00000077585	GPR137B	326.951	0.431407	5.63607e-07	9.82597e-06
ENSG00000167461	RAB8A	3325.76	-0.249851	5.63211e-07	9.82597e-06
ENSG00000145685	LHFPL2	220.998	0.556917	5.66314e-07	9.86339e-06
ENSG00000116984	MTR	3151.93	-0.32592	5.77155e-07	1.00324e-05
ENSG00000145414	NAF1	616.195	-0.395507	5.76662e-07	1.00324e-05
ENSG00000171497	PPID	1514.63	-0.251076	5.80792e-07	1.00856e-05
ENSG00000272841	AL139393.2	122.985	-0.705372	5.8376e-07	1.01271e-05
ENSG00000132142	NA	15508.9	-0.23304	5.89766e-07	1.02212e-05
ENSG00000166033	HTRA1	83.1413	0.886543	5.92725e-07	1.02624e-05
ENSG00000131462	TUBG1	5293.28	-0.330588	5.94841e-07	1.02889e-05
ENSG00000102743	SLC25A15	776.254	-0.300793	6.03569e-07	1.04163e-05
ENSG00000108828	VAT1	2607.11	0.325305	6.03981e-07	1.04163e-05
ENSG00000189403	HMGB1	10557.1	-0.278268	6.03147e-07	1.04163e-05
ENSG00000097046	CDC7	1301.52	-0.422439	6.06422e-07	1.04482e-05
ENSG00000139410	SDSL	454.044	0.592424	6.09748e-07	1.04952e-05
ENSG00000159055	MIS18A	544.022	-0.365685	6.11011e-07	1.05066e-05
ENSG00000095002	MSH2	400.2	-0.476974	6.12419e-07	1.05104e-05
ENSG00000143515	ATP8B2	796.423	0.307006	6.12424e-07	1.05104e-05
ENSG00000177606	JUN	1411.82	0.46673	6.20687e-07	1.06418e-05
ENSG00000172890	NADSYN1	1768.51	0.301872	6.24364e-07	1.06944e-05
ENSG00000178187	ZNF454	288.256	0.532838	6.26966e-07	1.07286e-05
ENSG00000136448	NMT1	2136.23	-0.227299	6.35166e-07	1.08583e-05
ENSG00000100422	CERK	43.8707	1.39855	6.41636e-07	1.09515e-05
ENSG00000184838	PRR16	32.7091	-1.45814	6.4186e-07	1.09515e-05
ENSG00000103067	ESRP2	3219.73	-0.281379	6.45601e-07	1.10046e-05
ENSG00000115183	TANC1	7056.27	0.176351	6.50424e-07	1.10761e-05
ENSG00000120896	SORBS3	789.161	0.432068	6.55669e-07	1.11546e-05
ENSG00000163479	SSR2	6084.12	0.347564	6.65326e-07	1.1308e-05
ENSG00000186205	2001-03-01	5149.19	-0.184115	6.75179e-07	1.14644e-05
ENSG00000119950	MXI1	1092.79	0.347772	6.78382e-07	1.14965e-05
ENSG00000149636	DSN1	889.988	-0.306607	6.77895e-07	1.14965e-05
ENSG00000156502	SUPV3L1	1616.96	-0.244981	6.82118e-07	1.15487e-05
ENSG00000133985	TTC9	196.852	0.64668	6.98058e-07	1.18073e-05
ENSG00000162631	NTNG1	128.233	-0.79504	7.02601e-07	1.18727e-05
ENSG00000146143	PRIM2	651.607	-0.462075	7.11633e-07	1.19907e-05
ENSG00000164167	LSM6	448.741	-0.438158	7.11554e-07	1.19907e-05
ENSG00000183828	NUDT14	441.171	0.497464	7.10718e-07	1.19907e-05
ENSG00000165730	STOX1	129.308	0.690762	7.18859e-07	1.21009e-05
ENSG00000087076	HSD17B14	26.2564	1.68435	7.21656e-07	1.21364e-05
ENSG00000198794	SCAMP5	195.208	0.583983	7.26626e-07	1.22083e-05
ENSG00000151304	SRFBP1	765.271	-0.453955	7.33419e-07	1.22934e-05
ENSG00000179889	PDXDC1	5814.72	-0.172695	7.33786e-07	1.22934e-05
ENSG00000262160	AC020978.5	706.155	-0.358466	7.32707e-07	1.22934e-05
ENSG00000197119	SLC25A29	1486.76	0.366077	7.354e-07	1.23087e-05
ENSG00000141582	CBX4	4153.04	0.365733	7.43954e-07	1.244e-05
ENSG00000066044	ELAVL1	4963.52	-0.17839	7.50232e-07	1.25331e-05
ENSG00000135365	PHF21A	1370.65	0.311425	7.79853e-07	1.30096e-05
ENSG00000174080	CTSF	414.383	0.555105	7.80236e-07	1.30096e-05
ENSG00000180385	EMC3-AS1	621.37	-0.369682	7.85479e-07	1.30846e-05
ENSG00000115946	PNO1	768.145	-0.356429	7.90946e-07	1.31632e-05
ENSG00000156599	ZDHHC5	5783.64	-0.158301	7.93114e-07	1.31868e-05
ENSG00000104147	OIP5	519.347	-0.457018	8.04324e-07	1.33606e-05
ENSG00000013288	MAN2B2	1635.25	0.249924	8.15527e-07	1.35339e-05
ENSG00000101098	RIMS4	130.876	0.748927	8.1651e-07	1.35374e-05
ENSG00000120833	SOCS2	131.348	-0.653888	8.32449e-07	1.37887e-05
ENSG00000237649	KIFC1	970.068	-0.322684	8.40881e-07	1.39153e-05
ENSG00000159556	ISL2	108.427	0.850778	8.47544e-07	1.40124e-05
ENSG00000114346	ECT2	3133.94	-0.484382	8.57879e-07	1.41699e-05
ENSG00000139946	PELI2	293.328	0.538553	8.66388e-07	1.4295e-05
ENSG00000196756	SNHG17	1477.53	-0.251116	8.67077e-07	1.4295e-05
ENSG00000135801	TAF5L	1220.02	-0.287917	8.684e-07	1.43034e-05
ENSG00000101311	FERMT1	689.389	-0.309275	9.05761e-07	1.49048e-05
ENSG00000007923	DNAJC11	3358.38	-0.304843	9.20697e-07	1.51364e-05
ENSG00000143157	POGK	3821.43	-0.211461	9.21705e-07	1.51388e-05
ENSG00000204054	LINC00963	2428.08	0.28452	9.33985e-07	1.53262e-05
ENSG00000100104	SRRD	1365.11	-0.241794	9.40069e-07	1.54024e-05
ENSG00000126005	MMP24OS	1243.58	0.41563	9.4038e-07	1.54024e-05
ENSG00000103319	EEF2K	1775.69	-0.23364	9.57778e-07	1.5666e-05
ENSG00000107951	MTPAP	1708.47	-0.285279	9.58255e-07	1.5666e-05
ENSG00000175061	LRRC75A-AS1	20071.1	0.326251	9.69276e-07	1.58315e-05
ENSG00000143815	LBR	2602.57	-0.36644	9.75071e-07	1.59114e-05
ENSG00000092470	WDR76	684.406	-0.385306	1.00584e-06	1.63983e-05
ENSG00000167333	TRIM68	1008.61	0.28698	1.01755e-06	1.65738e-05
ENSG00000128908	INO80	1913.92	-0.220042	1.0232e-06	1.66504e-05
ENSG00000143067	ZNF697	301.985	-0.57091	1.04273e-06	1.69525e-05
ENSG00000165661	QSOX2	1868.46	-0.241112	1.04947e-06	1.70464e-05
ENSG00000071553	ATP6AP1	2105.21	0.280087	1.06365e-06	1.72608e-05
ENSG00000133318	RTN3	8068.46	0.208566	1.07313e-06	1.73886e-05
ENSG00000166340	TPP1	2283.51	0.257031	1.0735e-06	1.73886e-05
ENSG00000165475	CRYL1	873.803	0.34754	1.09477e-06	1.77167e-05
ENSG00000069702	TGFBR3	903.056	0.2901	1.10113e-06	1.78034e-05
ENSG00000197771	MCMBP	2926.09	-0.307791	1.10237e-06	1.7807e-05
ENSG00000124789	NUP153	3781.16	-0.310797	1.11012e-06	1.79158e-05
ENSG00000089248	ERP29	3697.87	0.336022	1.11299e-06	1.79456e-05
ENSG00000205542	TMSB4X	75.6731	1.01793	1.13409e-06	1.82691e-05
ENSG00000138160	KIF11	1832.5	-0.4267	1.14832e-06	1.84813e-05
ENSG00000168032	ENTPD3	52.5921	1.14911	1.16487e-06	1.87306e-05
ENSG00000122642	FKBP9	1170.59	0.282603	1.19376e-06	1.91775e-05
ENSG00000245750	DRAIC	318.459	0.430008	1.21612e-06	1.95189e-05
ENSG00000115568	ZNF142	2152.09	-0.26549	1.22517e-06	1.96284e-05
ENSG00000141384	TAF4B	465.99	-0.377424	1.22448e-06	1.96284e-05
ENSG00000171385	KCND3	295.467	0.589808	1.22942e-06	1.96785e-05
ENSG00000117318	ID3	2004.79	0.546714	1.23222e-06	1.97055e-05
ENSG00000020922	MRE11	881.612	-0.404585	1.2404e-06	1.98182e-05
ENSG00000130518	IQCN	416.239	0.535249	1.24232e-06	1.98309e-05
ENSG00000130347	RTN4IP1	364.631	-0.427547	1.2444e-06	1.9846e-05
ENSG00000104549	SQLE	1427.98	-0.292869	1.25123e-06	1.9937e-05
ENSG00000162458	FBLIM1	93.6196	0.788916	1.25729e-06	2.00154e-05
ENSG00000221968	FADS3	506.853	0.483245	1.26456e-06	2.01128e-05
ENSG00000167861	HID1	3009.34	0.346808	1.27194e-06	2.0212e-05
ENSG00000066185	ZMYND12	125.855	0.731666	1.28699e-06	2.04327e-05
ENSG00000144118	RALB	1124.86	0.331696	1.28898e-06	2.04458e-05
ENSG00000196363	WDR5	2480.31	-0.236708	1.30194e-06	2.06329e-05
ENSG00000162433	AK4	4222.12	-0.291421	1.32204e-06	2.09325e-05
ENSG00000150687	PRSS23	65.6034	1.1341	1.35465e-06	2.14296e-05
ENSG00000104361	NIPAL2	427.361	0.502602	1.39322e-06	2.20199e-05
ENSG00000156471	PTDSS1	3828.06	-0.228389	1.39509e-06	2.20297e-05
ENSG00000155368	DBI	4146.13	-0.367229	1.42313e-06	2.24522e-05
ENSG00000058056	USP13	2716.22	-0.220565	1.46058e-06	2.30039e-05
ENSG00000103811	CTSH	3275.7	0.368734	1.46071e-06	2.30039e-05
ENSG00000129810	SGO1	651.406	-0.48471	1.46205e-06	2.30044e-05
ENSG00000145284	SCD5	373.382	0.455697	1.49015e-06	2.34257e-05
ENSG00000176845	METRNL	84.7653	0.794784	1.51144e-06	2.37391e-05
ENSG00000139116	KIF21A	2478.74	-0.291931	1.5194e-06	2.38428e-05
ENSG00000141140	NA	2740.78	-0.252171	1.52773e-06	2.39521e-05
ENSG00000126500	FLRT1	18.8649	1.78989	1.55374e-06	2.43382e-05
ENSG00000163655	GMPS	6176.83	-0.347576	1.56192e-06	2.44446e-05
ENSG00000112759	SLC29A1	944.925	-0.381648	1.57283e-06	2.45935e-05
ENSG00000164815	ORC5	1167.51	-0.536156	1.59385e-06	2.49e-05
ENSG00000100625	SIX4	760.59	-0.355092	1.60042e-06	2.49583e-05
ENSG00000261824	LINC00662	689.601	0.376889	1.59981e-06	2.49583e-05
ENSG00000123136	DDX39A	3142.67	-0.374862	1.6041e-06	2.49935e-05
ENSG00000243224	AC006252.1	61.6672	0.947117	1.63593e-06	2.54669e-05
ENSG00000166295	ANAPC16	1558.77	0.303997	1.707e-06	2.65498e-05
ENSG00000173692	PSMD1	4702.65	-0.209265	1.71332e-06	2.66245e-05
ENSG00000132329	RAMP1	1839.63	0.536371	1.72343e-06	2.6758e-05
ENSG00000073060	SCARB1	3922.45	-0.245683	1.73804e-06	2.69611e-05
ENSG00000111247	RAD51AP1	708.362	-0.43036	1.74034e-06	2.6973e-05
ENSG00000075651	PLD1	38.0359	1.29675	1.76538e-06	2.73333e-05
ENSG00000184675	AMER1	1221.65	-0.278737	1.76669e-06	2.73333e-05
ENSG00000100614	PPM1A	3356.31	-0.298222	1.7754e-06	2.74439e-05
ENSG00000167767	KRT80	107.956	0.968793	1.81298e-06	2.80002e-05
ENSG00000103404	USP31	2203.31	-0.248121	1.8338e-06	2.82968e-05
ENSG00000004487	KDM1A	3432.33	-0.187034	1.83811e-06	2.83384e-05
ENSG00000103460	TOX3	145.111	0.640431	1.87781e-06	2.89252e-05
ENSG00000186951	PPARA	665.392	0.34941	1.88401e-06	2.89703e-05
ENSG00000196510	ANAPC7	2038.37	-0.20553	1.88403e-06	2.89703e-05
ENSG00000225255	LINC01297	198.962	-0.581755	1.91285e-06	2.93878e-05
ENSG00000110104	CCDC86	3482.33	-0.333329	1.91947e-06	2.94636e-05
ENSG00000145476	CYP4V2	614.403	0.361264	1.93957e-06	2.97462e-05
ENSG00000251580	LINC02482	93.3988	0.785462	1.94774e-06	2.98456e-05
ENSG00000142657	PGD	7218.5	0.290371	1.95766e-06	2.99714e-05
ENSG00000213722	DDAH2	325.781	0.608091	1.96864e-06	3.01133e-05
ENSG00000182841	RRP7BP	602.18	-0.456567	2.00597e-06	3.06578e-05
ENSG00000033100	CHPF2	1200.31	0.318423	2.06008e-06	3.14574e-05
ENSG00000141232	TOB1	4263.68	0.193278	2.07546e-06	3.16647e-05
ENSG00000007255	TRAPPC6A	275.243	0.49467	2.09867e-06	3.19634e-05
ENSG00000185187	SIGIRR	635.691	0.477776	2.09801e-06	3.19634e-05
ENSG00000121653	MAPK8IP1	1122.91	0.395017	2.14242e-06	3.26015e-05
ENSG00000093183	SEC22C	2580.17	-0.213599	2.17226e-06	3.3027e-05
ENSG00000108384	RAD51C	1426.59	-0.331459	2.18919e-06	3.32557e-05
ENSG00000111981	ULBP1	209.024	0.68198	2.21378e-06	3.35711e-05
ENSG00000170581	STAT2	1560.62	0.25013	2.21319e-06	3.35711e-05
ENSG00000136937	NCBP1	2774.72	-0.344181	2.22896e-06	3.37722e-05
ENSG00000121413	ZSCAN18	814.178	0.393369	2.23711e-06	3.38666e-05
ENSG00000077152	UBE2T	1697.27	-0.347533	2.26483e-06	3.42568e-05
ENSG00000166197	NOLC1	8829.05	-0.274195	2.27331e-06	3.43556e-05
ENSG00000120690	ELF1	1044.38	0.266245	2.36879e-06	3.57677e-05
ENSG00000168806	LCMT2	1626.2	-0.254101	2.40485e-06	3.62733e-05
ENSG00000176124	DLEU1	694.582	-0.383395	2.4064e-06	3.62733e-05
ENSG00000065923	SLC9A7	1499.04	0.239348	2.44438e-06	3.68143e-05
ENSG00000090061	CCNK	1975.95	-0.212182	2.44703e-06	3.68226e-05
ENSG00000171617	ENC1	1149.46	0.319485	2.4694e-06	3.71275e-05
ENSG00000123600	METTL8	1099.95	-0.329481	2.47306e-06	3.71508e-05
ENSG00000181513	ACBD4	258.814	0.538908	2.50437e-06	3.7589e-05
ENSG00000175220	ARHGAP1	2861.76	-0.273791	2.51445e-06	3.77082e-05
ENSG00000103550	KNOP1	2492.49	-0.211928	2.51987e-06	3.77573e-05
ENSG00000120539	MASTL	664.694	-0.30564	2.52634e-06	3.78219e-05
ENSG00000116679	IVNS1ABP	1892.89	-0.360144	2.54981e-06	3.81409e-05
ENSG00000109971	HSPA8	81118.2	-0.258044	2.5799e-06	3.85582e-05
ENSG00000171444	MCC	227.223	0.547933	2.59703e-06	3.87813e-05
ENSG00000127220	ABHD8	723.159	0.445668	2.61046e-06	3.89487e-05
ENSG00000034677	RNF19A	876.479	0.42454	2.62259e-06	3.907e-05
ENSG00000156261	CCT8	10322.1	-0.29553	2.62303e-06	3.907e-05
ENSG00000130958	SLC35D2	354.339	0.454456	2.68664e-06	3.99836e-05
ENSG00000151014	NOCT	450.132	-0.406455	2.71427e-06	4.03607e-05
ENSG00000145632	PLK2	1555.16	-0.273306	2.78609e-06	4.13937e-05
ENSG00000205189	ZBTB10	2691.54	-0.644043	2.79217e-06	4.1449e-05
ENSG00000093167	LRRFIP2	1776.18	-0.186732	2.80352e-06	4.15824e-05
ENSG00000261521	NA	76.1524	1.04413	2.8088e-06	4.16256e-05
ENSG00000092201	SUPT16H	7181	-0.217954	2.8535e-06	4.22525e-05
ENSG00000100426	ZBED4	2905.04	-0.173867	2.85696e-06	4.22682e-05
ENSG00000160352	ZNF714	2087.35	-0.346291	2.87076e-06	4.24366e-05
ENSG00000131067	GGT7	440.664	0.510543	2.88075e-06	4.25485e-05
ENSG00000121897	LIAS	545.085	-0.32162	2.89693e-06	4.27285e-05
ENSG00000197312	DDI2	2856.98	-0.250817	2.89779e-06	4.27285e-05
ENSG00000167965	MLST8	2927.79	0.37775	2.92044e-06	4.30264e-05
ENSG00000101940	WDR13	666.922	0.390715	2.95607e-06	4.35149e-05
ENSG00000155761	SPAG17	20.7017	-1.87778	3.0671e-06	4.51114e-05
ENSG00000172992	DCAKD	1033.24	0.275565	3.06965e-06	4.51114e-05
ENSG00000135116	HRK	40.9088	1.20209	3.12419e-06	4.58744e-05
ENSG00000128694	OSGEPL1	412.712	-0.396135	3.22578e-06	4.73267e-05
ENSG00000139343	SNRPF	1962.63	-0.292438	3.23623e-06	4.74404e-05
ENSG00000103995	CEP152	935.712	-0.360385	3.24471e-06	4.74857e-05
ENSG00000108671	PSMD11	4528.59	-0.207	3.24229e-06	4.74857e-05
ENSG00000134278	SPIRE1	1124.55	0.268175	3.30139e-06	4.82749e-05
ENSG00000149187	CELF1	7419.1	-0.158659	3.3079e-06	4.833e-05
ENSG00000092421	SEMA6A	6701.55	0.264827	3.33564e-06	4.86948e-05
ENSG00000122203	KIAA1191	3325.24	0.225015	3.34694e-06	4.88193e-05
ENSG00000157483	MYO1E	851.602	-0.257188	3.3612e-06	4.89866e-05
ENSG00000130584	ZBTB46	259.26	0.577907	3.38573e-06	4.92625e-05
ENSG00000188747	NOXA1	134.135	0.739408	3.38296e-06	4.92625e-05
ENSG00000243701	DUBR	380.649	-0.464811	3.44821e-06	5.01301e-05
ENSG00000141504	SAT2	1007.37	0.415491	3.47584e-06	5.049e-05
ENSG00000133835	HSD17B4	5455.77	-0.208637	3.49593e-06	5.074e-05
ENSG00000136982	DSCC1	517.904	-0.534379	3.50475e-06	5.08261e-05
ENSG00000106554	CHCHD3	1821.55	-0.278226	3.52603e-06	5.10926e-05
ENSG00000177889	UBE2N	3197.83	-0.353355	3.53364e-06	5.11607e-05
ENSG00000135521	LTV1	880.529	-0.338694	3.53912e-06	5.11979e-05
ENSG00000171960	PPIH	1085.24	-0.368135	3.55914e-06	5.14452e-05
ENSG00000163597	SNHG16	8972.49	-0.192768	3.61086e-06	5.215e-05
ENSG00000133195	SLC39A11	703.988	0.313676	3.62109e-06	5.22548e-05
ENSG00000167799	NUDT8	1314.78	0.488518	3.64565e-06	5.25661e-05
ENSG00000232533	AC093673.1	46.1816	1.26227	3.68142e-06	5.30384e-05
ENSG00000197461	PDGFA	233.517	0.5498	3.69585e-06	5.31591e-05
ENSG00000271936	AC012073.1	218.966	-0.516182	3.69528e-06	5.31591e-05
ENSG00000114030	KPNA1	2417.82	-0.258314	3.70155e-06	5.31977e-05
ENSG00000011638	TMEM159	532.249	0.354969	3.73877e-06	5.36887e-05
ENSG00000092096	SLC22A17	436.713	0.416696	3.75623e-06	5.38954e-05
ENSG00000185924	RTN4RL1	290.472	0.623256	3.88414e-06	5.56854e-05
ENSG00000078369	GNB1	13133.1	0.12689	3.96724e-06	5.6738e-05
ENSG00000151883	PARP8	1327.21	0.337247	3.96692e-06	5.6738e-05
ENSG00000159182	PRAC1	2346.83	0.553978	3.96153e-06	5.6738e-05
ENSG00000105173	CCNE1	549.708	-0.340529	4.01923e-06	5.74348e-05
ENSG00000106049	HIBADH	1836	0.228837	4.10917e-06	5.86725e-05
ENSG00000164116	GUCY1A1	3638.4	-0.247991	4.13472e-06	5.89894e-05
ENSG00000143013	LMO4	1037.05	0.29445	4.14377e-06	5.90705e-05
ENSG00000057657	PRDM1	13.6385	-1.97274	4.15419e-06	5.91711e-05
ENSG00000064102	INTS13	1364.19	-0.307013	4.1739e-06	5.94038e-05
ENSG00000134453	RBM17	1907.64	-0.213448	4.19699e-06	5.96842e-05
ENSG00000081181	ARG2	2988.64	0.270177	4.22762e-06	6.00712e-05
ENSG00000084774	CAD	4528.56	-0.263329	4.31782e-06	6.13033e-05
ENSG00000160336	ZNF761	971.738	-0.379531	4.33553e-06	6.15051e-05
ENSG00000132953	XPO4	1730.54	-0.398153	4.35099e-06	6.16249e-05
ENSG00000144580	CNOT9	3076.18	-0.208714	4.34858e-06	6.16249e-05
ENSG00000117593	DARS2	1942.16	-0.228885	4.36818e-06	6.18187e-05
ENSG00000019549	SNAI2	40.9149	-1.16516	4.3811e-06	6.19518e-05
ENSG00000124508	BTN2A2	333.371	0.486042	4.41843e-06	6.24295e-05
ENSG00000109572	CLCN3	4718.71	0.271156	4.46047e-06	6.29728e-05
ENSG00000124155	PIGT	2840.03	0.340885	4.54034e-06	6.4049e-05
ENSG00000137393	RNF144B	405.298	0.524966	4.6347e-06	6.53277e-05
ENSG00000136141	LRCH1	495.907	-0.446943	4.66941e-06	6.57642e-05
ENSG00000145247	OCIAD2	900.406	0.332793	4.69517e-06	6.60742e-05
ENSG00000140451	PIF1	331.032	-0.446063	4.75478e-06	6.6847e-05
ENSG00000213694	S1PR3	239.215	-0.48986	4.75768e-06	6.6847e-05
ENSG00000139178	C1RL	1231.38	0.30895	4.77812e-06	6.70806e-05
ENSG00000115758	ODC1	16129.7	-0.186222	4.82109e-06	6.76299e-05
ENSG00000136045	PWP1	1713.78	-0.286294	4.87829e-06	6.83777e-05
ENSG00000021826	CPS1	490.998	0.362841	4.94141e-06	6.92073e-05
ENSG00000160190	SLC37A1	1158.7	0.291419	4.99615e-06	6.99183e-05
ENSG00000139496	NUP58	2432.82	-0.363555	5.03968e-06	7.04714e-05
ENSG00000068137	PLEKHH3	1910.8	0.35857	5.05572e-06	7.06395e-05
ENSG00000140199	SLC12A6	823.455	0.312647	5.1798e-06	7.23158e-05
ENSG00000138613	APH1B	699.65	0.400136	5.29866e-06	7.39166e-05
ENSG00000103365	GGA2	2398.43	-0.177801	5.30617e-06	7.39626e-05
ENSG00000175376	EIF1AD	1145.37	-0.288019	5.34702e-06	7.44731e-05
ENSG00000125485	DDX31	1286.75	-0.266009	5.41609e-06	7.53753e-05
ENSG00000169047	IRS1	284.109	-0.462417	5.44136e-06	7.56672e-05
ENSG00000085760	MTIF2	1152.4	-0.303645	5.46632e-06	7.59543e-05
ENSG00000113269	RNF130	2056.12	0.236042	5.47777e-06	7.60533e-05
ENSG00000152147	GEMIN6	496.293	-0.373432	5.50542e-06	7.63769e-05
ENSG00000176473	WDR25	327.502	0.431646	5.55117e-06	7.69509e-05
ENSG00000125652	ALKBH7	1089.06	0.57702	5.59824e-06	7.75422e-05
ENSG00000138029	HADHB	2685.82	0.198846	5.6121e-06	7.76731e-05
ENSG00000141030	COPS3	3304.91	-0.299969	5.63085e-06	7.78713e-05
ENSG00000115484	CCT4	6271.56	-0.2019	5.63979e-06	7.79337e-05
ENSG00000147010	SH3KBP1	562.657	0.376316	5.80515e-06	8.01557e-05
ENSG00000183049	CAMK1D	55.0579	1.1452	5.84179e-06	8.05983e-05
ENSG00000133028	SCO1	1389.13	-0.250934	5.86145e-06	8.08062e-05
ENSG00000184408	KCND2	202.64	-0.565651	5.90869e-06	8.13937e-05
ENSG00000136527	TRA2B	6529.25	-0.273403	5.91495e-06	8.14162e-05
ENSG00000132383	RPA1	5683.89	-0.160731	5.95953e-06	8.19657e-05
ENSG00000112276	BVES	73.3615	0.86336	6.01288e-06	8.26349e-05
ENSG00000165704	HPRT1	864.899	-0.430814	6.05542e-06	8.31545e-05
ENSG00000203497	PDCD4-AS1	66.9292	0.846047	6.18669e-06	8.48909e-05
ENSG00000145868	FBXO38	1966.29	-0.256006	6.3943e-06	8.76712e-05
ENSG00000165449	SLC16A9	363.209	0.511772	6.40287e-06	8.77203e-05
ENSG00000164294	GPX8	325.943	0.538216	6.4089e-06	8.77346e-05
ENSG00000167995	BEST1	293.137	0.861652	6.5085e-06	8.90288e-05
ENSG00000166016	ABTB2	459.789	0.411862	6.60019e-06	9.02128e-05
ENSG00000164251	F2RL1	1075.85	-0.284406	6.61816e-06	9.03883e-05
ENSG00000188312	CENPP	527.966	-0.323862	6.66833e-06	9.10029e-05
ENSG00000171302	CANT1	5410.24	-0.211099	6.74762e-06	9.20135e-05
ENSG00000101460	MAP1LC3A	87.0196	0.832591	6.76331e-06	9.20979e-05
ENSG00000146670	CDCA5	2628.68	-0.261375	6.76428e-06	9.20979e-05
ENSG00000054148	PHPT1	1516.98	0.408702	6.85192e-06	9.32189e-05
ENSG00000196352	CD55	42.0526	1.24272	6.88221e-06	9.35587e-05
ENSG00000100416	TRMU	1869.92	-0.231872	6.93815e-06	9.42464e-05
ENSG00000158296	SLC13A3	204.995	0.584762	6.95393e-06	9.43878e-05
ENSG00000146223	RPL7L1	5955.37	-0.17573	6.96222e-06	9.44274e-05
ENSG00000166226	CCT2	9912.25	-0.236191	7.03822e-06	9.53846e-05
ENSG00000111364	DDX55	1600.59	-0.208281	7.05092e-06	9.54832e-05
ENSG00000153029	MR1	247.967	0.536592	7.09523e-06	9.60093e-05
ENSG00000146263	MMS22L	771.192	-0.603282	7.11124e-06	9.61521e-05
ENSG00000170011	MYRIP	1202.18	0.25524	7.18533e-06	9.70792e-05
ENSG00000086061	DNAJA1	9558.1	-0.228403	7.21036e-06	9.72679e-05
ENSG00000184205	TSPYL2	261.831	0.505932	7.20743e-06	9.72679e-05
ENSG00000120885	CLU	417.106	0.432758	7.22649e-06	9.74108e-05
ENSG00000171443	ZNF524	296.573	0.507799	7.23922e-06	9.75078e-05
ENSG00000102054	RBBP7	3750.31	-0.188218	7.25343e-06	9.76244e-05
ENSG00000083307	GRHL2	6272.88	-0.169452	7.35365e-06	9.88976e-05
ENSG00000077238	IL4R	134.891	0.65081	7.39951e-06	9.93624e-05
ENSG00000083720	OXCT1	4724.95	-0.185632	7.39441e-06	9.93624e-05
ENSG00000110060	PUS3	970.878	-0.291393	7.40864e-06	9.94091e-05
ENSG00000204936	CD177	27.8969	1.37066	7.41573e-06	9.94284e-05
ENSG00000133816	MICAL2	1832.17	-0.217591	7.43382e-06	9.9595e-05
ENSG00000115091	ACTR3	5517.16	-0.214665	7.4423e-06	9.96328e-05
ENSG00000014216	CAPN1	3444.11	0.271545	7.48565e-06	0.000100137
ENSG00000132359	RAP1GAP2	2981.95	-0.222795	7.55142e-06	0.000100897
ENSG00000137460	FHDC1	1177.39	-0.263607	7.55392e-06	0.000100897
ENSG00000162949	CAPN13	335.606	0.471127	7.5763e-06	0.000101045
ENSG00000212864	RNF208	405.769	0.496003	7.57647e-06	0.000101045
ENSG00000130827	PLXNA3	410.582	0.475404	7.70572e-06	0.00010269
ENSG00000213015	ZNF580	391.84	0.501029	7.92581e-06	0.000105543
ENSG00000136518	ACTL6A	2549.84	-0.277072	7.93239e-06	0.000105551
ENSG00000170035	UBE2E3	2125.57	-0.325508	8.00523e-06	0.00010644
ENSG00000090238	YPEL3	225.601	0.569167	8.03983e-06	0.000106819
ENSG00000160991	ORAI2	490.846	0.594195	8.0686e-06	0.000107121
ENSG00000153574	RPIA	461.529	-0.376275	8.20425e-06	0.000108839
ENSG00000156639	ZFAND3	2123.56	0.204554	8.2217e-06	0.000108989
ENSG00000188089	PLA2G4E	10.7154	-2.24463	8.25314e-06	0.000109323
ENSG00000256073	URB1-AS1	375.197	0.539511	8.26054e-06	0.000109339
ENSG00000103024	NME3	832.468	0.494337	8.30064e-06	0.000109704
ENSG00000249348	UGDH-AS1	180.235	0.547273	8.29458e-06	0.000109704
ENSG00000138759	FRAS1	206.065	0.565696	8.31532e-06	0.000109816
ENSG00000135070	ISCA1	1419.83	-0.371653	8.35606e-06	0.000110271
ENSG00000107099	DOCK8	17.9887	-1.86235	8.40608e-06	0.000110848
ENSG00000170606	HSPA4	8314.94	-0.285125	8.44416e-06	0.000111267
ENSG00000187244	BCAM	930.886	0.368034	8.46422e-06	0.000111369
ENSG00000196591	HDAC2	4792.15	-0.270382	8.46461e-06	0.000111369
ENSG00000172663	TMEM134	2172.36	0.432358	8.48048e-06	0.000111495
ENSG00000085831	TTC39A	295.035	0.484763	8.65667e-06	0.000113726
ENSG00000162694	EXTL2	500.53	-0.48486	8.72813e-06	0.000114579
ENSG00000109103	UNC119	983.034	0.372255	8.7459e-06	0.000114727
ENSG00000214114	MYCBP	650.844	-0.429936	8.77219e-06	0.000114986
ENSG00000140263	SORD	15182.1	-0.204843	8.82581e-06	0.000115603
ENSG00000018699	TTC27	837.522	-0.332304	8.85299e-06	0.000115873
ENSG00000161395	PGAP3	391.572	0.451583	9.1371e-06	0.000119502
ENSG00000241935	HOGA1	206.766	0.562676	9.15327e-06	0.000119625
ENSG00000110328	GALNT18	629.233	0.363598	9.35135e-06	0.000122117
ENSG00000120306	CYSTM1	459.21	0.430049	9.35783e-06	0.000122117
ENSG00000162390	ACOT11	260.879	0.472718	9.41657e-06	0.000122791
ENSG00000167088	SNRPD1	2749.64	-0.280978	9.42347e-06	0.000122791
ENSG00000198912	C1orf174	755.986	-0.29185	9.48979e-06	0.000123564
ENSG00000109814	UGDH	3033.47	0.249602	9.69604e-06	0.000126156
ENSG00000183628	DGCR6	452.887	0.469214	9.7294e-06	0.000126497
ENSG00000188613	NANOS1	36.8662	1.12754	9.80385e-06	0.00012737
ENSG00000231007	CDC20P1	132.854	-0.649304	9.86953e-06	0.000128129
ENSG00000163536	SERPINI1	247.186	0.539277	9.9417e-06	0.000128971
ENSG00000165480	SKA3	699.237	-0.433011	9.98322e-06	0.000129414
ENSG00000212304	SNORD12	101.475	-0.692181	1.00424e-05	0.000130086
ENSG00000165501	LRR1	677.623	-0.460404	1.01276e-05	0.000131092
ENSG00000145375	SPATA5	912.706	-0.290659	1.02179e-05	0.000132164
ENSG00000167747	C19orf48	8619.18	-0.306741	1.03269e-05	0.000133475
ENSG00000198176	TFDP1	2771.82	-0.200664	1.03839e-05	0.000134114
ENSG00000180035	ZNF48	736.392	0.425906	1.04962e-05	0.000135465
ENSG00000164086	DUSP7	1114.71	-0.303973	1.05207e-05	0.000135682
ENSG00000172819	RARG	724.629	0.292825	1.05322e-05	0.000135731
ENSG00000102908	NFAT5	7255.8	0.390383	1.05903e-05	0.000136379
ENSG00000111641	NOP2	3270.14	-0.267316	1.06003e-05	0.000136408
ENSG00000110880	CORO1C	1928.53	-0.187153	1.0699e-05	0.000137577
ENSG00000198208	RPS6KL1	590.8	0.429437	1.07413e-05	0.00013802
ENSG00000181026	AEN	2438.14	-0.238753	1.07617e-05	0.000138182
ENSG00000136367	ZFHX2	307.266	0.517656	1.08388e-05	0.00013907
ENSG00000167671	UBXN6	2227.31	0.37268	1.09945e-05	0.000140965
ENSG00000073331	ALPK1	176.831	0.526529	1.10687e-05	0.000141813
ENSG00000149600	COMMD7	1226.47	0.29025	1.12513e-05	0.000144048
ENSG00000125347	IRF1	120.606	0.731124	1.13481e-05	0.000145181
ENSG00000165055	METTL2B	1181.35	-0.234981	1.14916e-05	0.00014691
ENSG00000164403	SHROOM1	535.025	0.375007	1.16587e-05	0.000148938
ENSG00000164032	H2AFZ	11224.5	-0.236845	1.16806e-05	0.00014911
ENSG00000266729	DSG1-AS1	106.71	-0.640886	1.1739e-05	0.000149747
ENSG00000109458	GAB1	281.836	0.453625	1.18556e-05	0.000151125
ENSG00000112812	PRSS16	95.1828	0.669911	1.1883e-05	0.000151365
ENSG00000123416	TUBA1B	38895.7	-0.259425	1.2006e-05	0.00015282
ENSG00000169302	STK32A	54.5312	1.10268	1.20418e-05	0.000153165
ENSG00000273084	AC092171.5	205.624	0.514452	1.20802e-05	0.000153542
ENSG00000261220	AC103706.1	246.931	0.553228	1.23536e-05	0.000156904
ENSG00000184674	NA	589.156	0.391144	1.2384e-05	0.000157176
ENSG00000151923	TIAL1	3020.29	-0.196034	1.24124e-05	0.000157424
ENSG00000048162	NOP16	1975.01	-0.372242	1.24752e-05	0.000157992
ENSG00000114480	GBE1	1073.59	-0.24496	1.24708e-05	0.000157992
ENSG00000150667	FSIP1	116.128	0.795777	1.24959e-05	0.000158141
ENSG00000040199	PHLPP2	1551.23	-0.238397	1.25145e-05	0.000158262
ENSG00000115970	THADA	1209.54	-0.30953	1.25309e-05	0.000158356
ENSG00000136643	RPS6KC1	1490.24	-0.248042	1.25698e-05	0.000158734
ENSG00000162738	VANGL2	92.4956	0.698819	1.27744e-05	0.000161201
ENSG00000214756	CSKMT	757.262	-0.305336	1.28947e-05	0.000162603
ENSG00000119686	FLVCR2	207.81	0.591532	1.30599e-05	0.00016445
ENSG00000232859	LYRM9	85.1666	0.837528	1.30568e-05	0.00016445
ENSG00000121957	GPSM2	752.704	-0.302159	1.30938e-05	0.000164737
ENSG00000266208	AC080112.1	279.661	0.564458	1.31014e-05	0.000164737
ENSG00000178498	DTX3	61.1561	0.870995	1.31333e-05	0.000165019
ENSG00000132155	RAF1	4344.48	-0.194025	1.31472e-05	0.000165076
ENSG00000154917	RAB6B	692.067	0.338268	1.31894e-05	0.000165488
ENSG00000239911	PRKAG2-AS1	52.5513	1.05676	1.32382e-05	0.000165982
ENSG00000197024	ZNF398	1442.83	-0.229011	1.32834e-05	0.00016643
ENSG00000247596	TWF2	204.876	0.577331	1.332e-05	0.00016677
ENSG00000109805	NCAPG	2220.23	-0.453833	1.33436e-05	0.000166946
ENSG00000164695	CHMP4C	721.808	0.319374	1.3368e-05	0.000167133
ENSG00000136877	FPGS	2078.16	0.315794	1.34e-05	0.000167415
ENSG00000080839	RBL1	1149.32	-0.363103	1.34219e-05	0.000167569
ENSG00000262209	PCDHGB3	106.957	0.68812	1.3527e-05	0.000168761
ENSG00000104059	FAM189A1	73.683	0.815739	1.36173e-05	0.000169767
ENSG00000179178	TMEM125	899.747	0.460323	1.3705e-05	0.00017074
ENSG00000129103	SUMF2	3457.28	0.224603	1.38891e-05	0.000172911
ENSG00000128891	CCDC32	687.579	0.335791	1.40038e-05	0.000174215
ENSG00000180425	C11orf71	457.848	0.433093	1.40871e-05	0.000175128
ENSG00000159267	HLCS	1410.6	0.203007	1.42839e-05	0.000177417
ENSG00000159873	CCDC117	2291.22	-0.26337	1.42914e-05	0.000177417
ENSG00000166181	API5	5132.14	-0.314136	1.43601e-05	0.000178145
ENSG00000215251	FASTKD5	1520.2	-0.241092	1.43871e-05	0.000178353
ENSG00000118412	CASP8AP2	483.075	-0.428567	1.44324e-05	0.000178789
ENSG00000111752	PHC1	350.073	0.41735	1.45114e-05	0.000179641
ENSG00000103356	EARS2	2548.18	-0.171902	1.47496e-05	0.000182461
ENSG00000107566	ERLIN1	852.624	-0.305342	1.48478e-05	0.000183548
ENSG00000140941	MAP1LC3B	930.263	0.291301	1.51041e-05	0.000186584
ENSG00000181472	ZBTB2	465.334	-0.384804	1.51217e-05	0.00018667
ENSG00000012822	CALCOCO1	413.302	0.522554	1.53042e-05	0.000188791
ENSG00000120437	ACAT2	1852.9	-0.242282	1.54643e-05	0.000190633
ENSG00000146416	AIG1	1543.79	0.270356	1.54846e-05	0.000190749
ENSG00000113282	CLINT1	2135.76	-0.209666	1.56517e-05	0.000192666
ENSG00000181789	COPG1	6585.44	0.199165	1.56621e-05	0.000192666
ENSG00000177570	SAMD12	456.164	0.39393	1.58101e-05	0.00019435
ENSG00000135596	MICAL1	535.908	-0.456197	1.59014e-05	0.000195337
ENSG00000240225	ZNF542P	2035.99	-0.287726	1.59253e-05	0.000195493
ENSG00000213983	AP1G2	1594.39	0.309189	1.60997e-05	0.000197496
ENSG00000168070	MAJIN	53.2371	1.15927	1.61409e-05	0.000197864
ENSG00000100722	ZC3H14	3924.78	-0.204516	1.62614e-05	0.000199202
ENSG00000076513	ANKRD13A	2034.96	0.207285	1.63424e-05	0.000200056
ENSG00000033800	PIAS1	1247.62	-0.287208	1.64911e-05	0.000201554
ENSG00000074590	NUAK1	229.573	0.456978	1.65198e-05	0.000201554
ENSG00000102316	MAGED2	2811.78	0.253667	1.65024e-05	0.000201554
ENSG00000197965	MPZL1	5123.83	-0.154436	1.65032e-05	0.000201554
ENSG00000201098	RNY1	36.5067	-2.14243	1.65221e-05	0.000201554
ENSG00000057252	SOAT1	1350.12	-0.427746	1.6567e-05	0.000201962
ENSG00000101849	TBL1X	2584.69	-0.156251	1.67553e-05	0.000204115
ENSG00000127129	EDN2	140.073	0.736692	1.6822e-05	0.000204786
ENSG00000107745	MICU1	2110.46	0.219722	1.70859e-05	0.000207711
ENSG00000109107	ALDOC	1127.23	0.316243	1.70805e-05	0.000207711
ENSG00000075131	TIPIN	724.752	-0.359407	1.72262e-05	0.000209272
ENSG00000099953	MMP11	195.466	0.57444	1.73368e-05	0.000210471
ENSG00000183431	SF3A3	4158.85	-0.210966	1.75305e-05	0.000212675
ENSG00000132436	FIGNL1	2791.77	-0.259001	1.76616e-05	0.000214119
ENSG00000166454	ATMIN	2864.12	-0.232154	1.77675e-05	0.000215254
ENSG00000054793	ATP9A	3589.65	0.19663	1.79741e-05	0.000217607
ENSG00000129195	PIMREG	1311.53	-0.269657	1.80167e-05	0.000217972
ENSG00000112739	PRPF4B	2783.54	-0.300229	1.81624e-05	0.000219584
ENSG00000171574	ZNF584	761.397	-0.262776	1.82081e-05	0.000219985
ENSG00000100575	TIMM9	940.665	-0.333328	1.83184e-05	0.000221166
ENSG00000223001	RNU2-61P	20.8022	-1.79426	1.85208e-05	0.000223456
ENSG00000154429	CCSAP	930.614	-0.325284	1.85906e-05	0.000223997
ENSG00000248144	ADH1C	42.6509	-1.12225	1.85911e-05	0.000223997
ENSG00000106772	PRUNE2	38150.2	0.186369	1.88515e-05	0.00022698
ENSG00000064703	DDX20	1109.84	-0.391823	1.89108e-05	0.000227538
ENSG00000033050	ABCF2	3555.29	-0.2315	1.89452e-05	0.000227795
ENSG00000113742	CPEB4	2066.97	0.254783	1.90135e-05	0.000228461
ENSG00000231925	TAPBP	432.189	0.400522	1.90349e-05	0.000228562
ENSG00000164933	SLC25A32	883.772	-0.430302	1.91617e-05	0.000229927
ENSG00000158195	WASF2	6479.35	-0.17939	1.92375e-05	0.00023068
ENSG00000164104	HMGB2	4536.59	-0.291138	1.93523e-05	0.000231898
ENSG00000073150	PANX2	347.844	0.491176	1.95847e-05	0.000234523
ENSG00000205659	LIN52	539.67	-0.327775	1.96505e-05	0.000235151
ENSG00000127527	EPS15L1	2395.44	-0.226128	1.98939e-05	0.000237902
ENSG00000137171	KLC4	183.478	0.582237	1.99275e-05	0.00023798
ENSG00000175643	RMI2	461.973	-0.408479	1.99236e-05	0.00023798
ENSG00000132300	PTCD3	3358.73	-0.273433	1.99462e-05	0.000238042
ENSG00000116750	UCHL5	1256.47	-0.505722	2.00707e-05	0.000239366
ENSG00000133639	BTG1	8589.22	-0.199802	2.00922e-05	0.00023946
ENSG00000124588	NQO2	703.992	0.371978	2.0114e-05	0.000239557
ENSG00000051620	HEBP2	3171.86	-0.274713	2.01741e-05	0.000239947
ENSG00000145293	ENOPH1	2350.45	-0.220907	2.01709e-05	0.000239947
ENSG00000178026	LRRC75B	288.602	0.489924	2.02606e-05	0.000240813
ENSG00000067064	IDI1	1382.32	-0.366314	2.02755e-05	0.000240829
ENSG00000125534	PPDPF	7021.52	0.368067	2.04429e-05	0.000242653
ENSG00000124635	HIST1H2BJ	5443.1	-0.359562	2.07276e-05	0.000245867
ENSG00000186566	GPATCH8	1466.57	-0.221205	2.07763e-05	0.000246277
ENSG00000171428	NAT1	394.619	-0.475473	2.094e-05	0.000248051
ENSG00000162769	FLVCR1	1401.04	-0.314738	2.1028e-05	0.000248924
ENSG00000176720	BOK	955.103	0.412976	2.1042e-05	0.000248924
ENSG00000167749	KLK4	1522.3	-0.325908	2.10661e-05	0.000249042
ENSG00000189060	H1F0	12341.3	-0.156056	2.12405e-05	0.000250935
ENSG00000104883	PEX11G	196.16	0.580188	2.13316e-05	0.000251842
ENSG00000116717	GADD45A	273.302	0.514337	2.13678e-05	0.0002521
ENSG00000006704	GTF2IRD1	790.337	0.305891	2.14015e-05	0.000252329
ENSG00000154654	NCAM2	16418.4	0.205757	2.16757e-05	0.00025539
ENSG00000137575	SDCBP	2013.84	-0.32014	2.17389e-05	0.000255963
ENSG00000088002	SULT2B1	325.858	0.483547	2.17583e-05	0.00025602
ENSG00000169299	PGM2	2471.34	-0.198862	2.18452e-05	0.000256871
ENSG00000165272	AQP3	721.615	0.370606	2.19167e-05	0.000257539
ENSG00000151092	NGLY1	1414.22	-0.299784	2.20335e-05	0.000258739
ENSG00000171604	CXXC5	804.042	0.308474	2.24122e-05	0.000263011
ENSG00000169604	ANTXR1	481.176	0.361643	2.2681e-05	0.000265988
ENSG00000143409	MINDY1	301.91	0.425602	2.27768e-05	0.000266933
ENSG00000113810	SMC4	6650.68	-0.458113	2.28599e-05	0.000267729
ENSG00000136770	DNAJC1	1375.06	-0.194263	2.29171e-05	0.00026822
ENSG00000047849	MAP4	11456.9	0.167522	2.2935e-05	0.000268251
ENSG00000005882	PDK2	815.465	0.316164	2.30551e-05	0.000269476
ENSG00000162552	WNT4	60.7648	1.05192	2.32271e-05	0.000271307
ENSG00000131016	AKAP12	48.2671	-1.51579	2.35667e-05	0.000275091
ENSG00000196547	MAN2A2	1874.3	0.231598	2.36984e-05	0.000276444
ENSG00000144136	SLC20A1	2807.6	-0.193043	2.38792e-05	0.000278213
ENSG00000183520	UTP11	1979.46	-0.284323	2.38816e-05	0.000278213
ENSG00000141524	TMC6	1289.05	0.343931	2.39686e-05	0.000279041
ENSG00000205060	SLC35B4	2329.07	-0.259018	2.39877e-05	0.000279079
ENSG00000106348	IMPDH1	2411.77	-0.276412	2.41443e-05	0.000280715
ENSG00000128604	IRF5	358.408	0.468199	2.43037e-05	0.000282382
ENSG00000198900	TOP1	6816.51	-0.184159	2.43456e-05	0.000282682
ENSG00000167513	CDT1	1409.83	-0.257565	2.44239e-05	0.000283404
ENSG00000169733	RFNG	378.198	0.378527	2.45098e-05	0.000284214
ENSG00000110108	TMEM109	4256.96	-0.257752	2.45285e-05	0.000284242
ENSG00000177181	RIMKLA	850.596	0.266206	2.45642e-05	0.00028447
ENSG00000136891	TEX10	894.077	-0.359514	2.45876e-05	0.000284553
ENSG00000102753	KPNA3	918.991	-0.458354	2.46916e-05	0.000285381
ENSG00000223396	RPS10P7	194.238	0.618073	2.4691e-05	0.000285381
ENSG00000169242	EFNA1	1229.54	0.335628	2.47127e-05	0.000285438
ENSG00000154305	MIA3	7529.84	0.181715	2.47702e-05	0.000285913
ENSG00000170500	LONRF2	451.624	0.446407	2.4804e-05	0.000286117
ENSG00000198237	AC131392.1	141.828	0.626316	2.48559e-05	0.000286526
ENSG00000167419	LPO	11.4946	2.07501	2.50328e-05	0.000288377
ENSG00000111716	LDHB	8855.32	-0.217206	2.52058e-05	0.000289991
ENSG00000142687	KIAA0319L	4149.75	0.199974	2.5203e-05	0.000289991
ENSG00000139737	SLAIN1	823.479	-0.277813	2.53271e-05	0.000291196
ENSG00000120942	UBIAD1	1734.82	-0.240261	2.53546e-05	0.000291321
ENSG00000197063	MAFG	847.301	0.288079	2.53832e-05	0.000291459
ENSG00000186458	DEFB132	117.367	-0.619302	2.56178e-05	0.000293961
ENSG00000112343	TRIM38	535.961	0.366907	2.56546e-05	0.000294192
ENSG00000131408	NR1H2	1368.31	0.315616	2.57005e-05	0.000294526
ENSG00000114544	SLC41A3	863.744	0.285772	2.57498e-05	0.000294899
ENSG00000116977	LGALS8	1465.49	0.334876	2.60794e-05	0.00029848
ENSG00000079841	RIMS1	1727.93	0.259445	2.61777e-05	0.00029941
ENSG00000204525	HLA-C	581.088	0.38445	2.64694e-05	0.000302549
ENSG00000243081	AC092894.1	99.6	0.79704	2.65782e-05	0.000303596
ENSG00000111665	CDCA3	850.909	-0.391943	2.66249e-05	0.000303932
ENSG00000079156	OSBPL6	282.959	0.420751	2.6791e-05	0.000305629
ENSG00000163507	CIP2A	862.92	-0.511399	2.68233e-05	0.0003058
ENSG00000180198	RCC1	3974.98	-0.327965	2.68604e-05	0.000306024
ENSG00000074181	NOTCH3	1748.62	0.423479	2.73463e-05	0.000311276
ENSG00000133466	C1QTNF6	237.849	0.529414	2.73568e-05	0.000311276
ENSG00000152253	SPC25	333.512	-0.504622	2.7746e-05	0.000315501
ENSG00000119203	CPSF3	1951.84	-0.252905	2.79113e-05	0.000317175
ENSG00000163083	INHBB	240.885	0.444007	2.79869e-05	0.000317829
ENSG00000175115	PACS1	1870.47	-0.303886	2.81287e-05	0.000319234
ENSG00000153113	CAST	2797.36	0.205948	2.81703e-05	0.000319294
ENSG00000183317	EPHA10	293.394	0.546335	2.81671e-05	0.000319294
ENSG00000135316	SYNCRIP	3826.52	-0.481536	2.8565e-05	0.000323559
ENSG00000175573	C11orf68	720.224	0.427878	2.87296e-05	0.000325214
ENSG00000137124	ALDH1B1	4167.59	-0.181031	2.90107e-05	0.000328185
ENSG00000136895	GARNL3	496.018	0.318521	2.90426e-05	0.000328334
ENSG00000185624	P4HB	24962.8	0.237605	2.94385e-05	0.000332382
ENSG00000197622	CDC42SE1	5172.33	-0.159558	2.94319e-05	0.000332382
ENSG00000159363	ATP13A2	1142.63	0.329782	2.96762e-05	0.000334852
ENSG00000170515	PA2G4	6295.66	-0.26711	2.97367e-05	0.000335105
ENSG00000186432	KPNA4	3029.04	-0.305066	2.97289e-05	0.000335105
ENSG00000259758	NA	4130.5	-0.292886	3.0058e-05	0.000338509
ENSG00000163617	CCDC191	117.566	0.65205	3.01574e-05	0.000339411
ENSG00000182224	CYB5D1	2014.66	-0.23215	3.02691e-05	0.00034045
ENSG00000148187	MRRF	1809.23	-0.213279	3.03132e-05	0.000340728
ENSG00000178467	P4HTM	1439.4	0.319287	3.03671e-05	0.000341116
ENSG00000169241	SLC50A1	2303.02	0.324031	3.05841e-05	0.000343334
ENSG00000047315	POLR2B	6725.31	-0.247885	3.06901e-05	0.000344305
ENSG00000083223	TUT7	1912.66	-0.301024	3.0755e-05	0.000344736
ENSG00000189057	FAM111B	2442.61	-0.616993	3.07678e-05	0.000344736
ENSG00000182606	TRAK1	2150.31	-0.194128	3.07935e-05	0.000344805
ENSG00000101473	ACOT8	639.639	0.384099	3.0928e-05	0.000346091
ENSG00000125166	GOT2	9085.37	-0.191225	3.11021e-05	0.000347818
ENSG00000136159	NUDT15	853.459	-0.335802	3.13169e-05	0.000349881
ENSG00000136273	HUS1	1276.04	-0.205629	3.13263e-05	0.000349881
ENSG00000005889	ZFX	1928.65	-0.226745	3.15195e-05	0.000351815
ENSG00000063601	MTMR1	754.756	-0.279285	3.16296e-05	0.00035282
ENSG00000151693	ASAP2	1614.21	0.261346	3.17396e-05	0.000353822
ENSG00000060688	SNRNP40	2935.6	-0.234258	3.18902e-05	0.000355276
ENSG00000233215	LINC01687	807.883	0.377389	3.19828e-05	0.000356082
ENSG00000169814	BTD	748.355	0.285519	3.20207e-05	0.000356278
ENSG00000175305	CCNE2	1129.99	-0.495721	3.22241e-05	0.000358314
ENSG00000088543	C3orf18	301.82	0.470095	3.22814e-05	0.000358725
ENSG00000118193	KIF14	1029.93	-0.463282	3.24158e-05	0.000359992
ENSG00000167258	CDK12	5633.93	-0.142448	3.25507e-05	0.000361261
ENSG00000101224	CDC25B	1990.53	-0.253742	3.27641e-05	0.0003634
ENSG00000174469	CNTNAP2	345.121	-0.407463	3.28644e-05	0.000364284
ENSG00000167642	SPINT2	5547.62	0.356755	3.3066e-05	0.000366288
ENSG00000121057	AKAP1	4036.21	-0.383189	3.32333e-05	0.000367761
ENSG00000163704	PRRT3	147.855	0.522212	3.32409e-05	0.000367761
ENSG00000077092	RARB	240.266	-0.498486	3.3293e-05	0.000368106
ENSG00000007968	E2F2	765.362	-0.311315	3.34223e-05	0.000369304
ENSG00000166803	PCLAF	872.863	-0.349933	3.35188e-05	0.000370084
ENSG00000198832	SELENOM	1343.5	0.515156	3.3535e-05	0.000370084
ENSG00000119801	YPEL5	453.575	0.413928	3.37558e-05	0.000372287
ENSG00000067836	ROGDI	1421.69	0.374136	3.42259e-05	0.000377236
ENSG00000134748	PRPF38A	3003.3	-0.171731	3.43169e-05	0.000378002
ENSG00000116675	DNAJC6	101.205	0.784808	3.43666e-05	0.000378076
ENSG00000241945	PWP2	1136.38	-0.331343	3.43586e-05	0.000378076
ENSG00000079739	PGM1	1360.9	0.235427	3.48967e-05	0.000383667
ENSG00000102984	ZNF821	327.827	0.454122	3.52657e-05	0.000387482
ENSG00000143816	WNT9A	77.1425	0.849483	3.53156e-05	0.000387767
ENSG00000153207	AHCTF1	4711.85	-0.325173	3.53357e-05	0.000387767
ENSG00000167964	RAB26	696.091	0.386197	3.54551e-05	0.000388834
ENSG00000134759	ELP2	2630.45	-0.239749	3.55285e-05	0.000389396
ENSG00000164615	CAMLG	624.785	0.2978	3.56142e-05	0.000390093
ENSG00000125107	CNOT1	17000.1	-0.159411	3.609e-05	0.000395059
ENSG00000100281	HMGXB4	1895.01	-0.168949	3.61889e-05	0.000395895
ENSG00000138399	FASTKD1	709.53	-0.458208	3.62809e-05	0.000396654
ENSG00000251003	ZFPM2-AS1	347.867	0.449989	3.6671e-05	0.000400422
ENSG00000267106	ZNF561-AS1	428.207	0.382506	3.66705e-05	0.000400422
ENSG00000104964	AES	5611.08	0.276763	3.69099e-05	0.000402781
ENSG00000091136	LAMB1	299.406	0.422113	3.713e-05	0.000404931
ENSG00000147874	HAUS6	1828.68	-0.442381	3.72573e-05	0.000406068
ENSG00000132635	PCED1A	711.78	0.360418	3.8019e-05	0.000414112
ENSG00000163528	CHCHD4	1015.63	-0.30702	3.82671e-05	0.000416557
ENSG00000125753	VASP	1188.56	0.295864	3.84143e-05	0.000417643
ENSG00000156469	MTERF3	589.196	-0.435532	3.83966e-05	0.000417643
ENSG00000143457	GOLPH3L	1337.97	0.32113	3.85508e-05	0.000418868
ENSG00000112742	TTK	619.831	-0.632616	3.89107e-05	0.000422518
ENSG00000110492	MDK	704.602	0.487971	3.90502e-05	0.000423771
ENSG00000140398	NEIL1	202.138	0.636405	3.9376e-05	0.000426839
ENSG00000165934	CPSF2	4938.19	-0.261413	3.93815e-05	0.000426839
ENSG00000064270	ATP2C2	729.867	0.498086	3.9458e-05	0.000427405
ENSG00000168264	IRF2BP2	1873.4	0.239337	3.97081e-05	0.000429849
ENSG00000113716	HMGXB3	3860.3	-0.228162	3.99483e-05	0.000432184
ENSG00000143494	VASH2	677.011	-0.317517	4.02206e-05	0.000434862
ENSG00000065534	MYLK	445.356	0.481102	4.0285e-05	0.000435291
ENSG00000163814	CDCP1	4201.17	-0.182792	4.03505e-05	0.000435731
ENSG00000114654	EFCC1	34.2443	1.24203	4.05588e-05	0.000437712
ENSG00000125779	PANK2	1754.49	-0.204925	4.07684e-05	0.000439704
ENSG00000108375	RNF43	727.069	0.295675	4.12176e-05	0.000444177
ENSG00000129682	FGF13	104.022	0.74292	4.12344e-05	0.000444177
ENSG00000160691	SHC1	3390.84	0.233124	4.12589e-05	0.000444177
ENSG00000103152	MPG	872.589	0.492364	4.13323e-05	0.000444695
ENSG00000141574	SECTM1	420.47	0.463515	4.15128e-05	0.000446364
ENSG00000130733	YIPF2	1035.36	0.343155	4.19475e-05	0.000450763
ENSG00000176953	NFATC2IP	1907.63	-0.173537	4.23594e-05	0.000454633
ENSG00000197498	RPF2	2369.95	-0.276883	4.2338e-05	0.000454633
ENSG00000196455	PIK3R4	2213.6	-0.214519	4.24615e-05	0.000455451
ENSG00000104341	LAPTM4B	1597.92	0.228518	4.2957e-05	0.000460485
ENSG00000164056	SPRY1	542.957	-0.342052	4.29869e-05	0.000460525
ENSG00000113070	HBEGF	316.06	0.402376	4.30938e-05	0.000461389
ENSG00000181045	SLC26A11	502.569	0.399183	4.32748e-05	0.000463046
ENSG00000215630	GUSBP9	244.635	0.530049	4.36056e-05	0.000466302
ENSG00000152240	HAUS1	751.55	-0.314497	4.37473e-05	0.000467533
ENSG00000204406	MBD5	649.42	0.350942	4.40514e-05	0.000470497
ENSG00000138074	SLC5A6	1645.35	-0.228631	4.42678e-05	0.000472388
ENSG00000197903	HIST1H2BK	16011	-0.296737	4.42822e-05	0.000472388
ENSG00000079387	SENP1	1383.13	-0.216618	4.4516e-05	0.000474595
ENSG00000123213	NLN	3021.6	-0.18562	4.48752e-05	0.000477845
ENSG00000251192	ZNF674	240.433	0.477057	4.48734e-05	0.000477845
ENSG00000166816	LDHD	783.443	0.395657	4.49063e-05	0.000477887
ENSG00000255193	AC100768.2	177.205	0.651794	4.50361e-05	0.000478978
ENSG00000117751	PPP1R8	1983.45	-0.203915	4.65487e-05	0.000494766
ENSG00000206527	HACD2	3608.52	-0.38524	4.69346e-05	0.000498566
ENSG00000112679	DUSP22	352.303	0.357823	4.70107e-05	0.000499074
ENSG00000139734	DIAPH3	1419.8	-0.333995	4.70746e-05	0.000499451
ENSG00000179409	GEMIN4	2886.99	-0.243903	4.75277e-05	0.000503954
ENSG00000115687	PASK	2857.44	-0.251778	4.76495e-05	0.000504941
ENSG00000145365	TIFA	238.27	-0.441091	4.81739e-05	0.000510191
ENSG00000247077	PGAM5	3335.29	-0.267401	4.83149e-05	0.000511376
ENSG00000099810	MTAP	1385.06	-0.310363	4.8482e-05	0.000512528
ENSG00000122873	CISD1	672.511	-0.340091	4.84654e-05	0.000512528
ENSG00000157064	NMNAT2	456.342	0.334389	4.85865e-05	0.000513325
ENSG00000105939	ZC3HAV1	5137.34	-0.195799	4.87766e-05	0.000515023
ENSG00000060138	YBX3	6117.84	-0.18419	4.90946e-05	0.00051807
ENSG00000005156	LIG3	2296.05	-0.194421	4.93557e-05	0.000520149
ENSG00000109084	TMEM97	570.449	-0.395654	4.93286e-05	0.000520149
ENSG00000125991	ERGIC3	4912.14	0.27995	4.93803e-05	0.000520149
ENSG00000144468	RHBDD1	1090.83	0.235248	4.94933e-05	0.000520715
ENSG00000254402	LRRC24	78.2687	0.865786	4.94875e-05	0.000520715
ENSG00000135924	DNAJB2	1021.4	0.355277	4.96627e-05	0.000522186
ENSG00000179912	R3HDM2	985.686	0.293407	4.97198e-05	0.000522474
ENSG00000171824	EXOSC10	2962.7	-0.206279	5.0129e-05	0.00052646
ENSG00000115548	KDM3A	1136.5	0.240977	5.03896e-05	0.000528881
ENSG00000102384	CENPI	822.821	-0.425183	5.0596e-05	0.000530414
ENSG00000115368	WDR75	1784.67	-0.368178	5.05806e-05	0.000530414
ENSG00000204308	RNF5	512.759	0.319803	5.09525e-05	0.000533833
ENSG00000127804	METTL16	2488.02	-0.196398	5.0998e-05	0.000533992
ENSG00000204842	ATXN2	2938.33	-0.200516	5.11644e-05	0.000535415
ENSG00000039068	CDH1	17620.7	0.158908	5.12637e-05	0.000536136
ENSG00000136247	ZDHHC4	1770.01	0.206906	5.13915e-05	0.000537152
ENSG00000175198	PCCA	804.574	0.285165	5.14779e-05	0.000537736
ENSG00000113369	ARRDC3	2943.91	0.351309	5.15565e-05	0.000538238
ENSG00000150672	DLG2	161.526	-0.542454	5.18587e-05	0.000541072
ENSG00000137880	GCHFR	366.208	0.514075	5.23535e-05	0.00054591
ENSG00000112149	CD83	104.02	0.655661	5.24146e-05	0.000546223
ENSG00000117523	PRRC2C	12725.3	-0.227218	5.2547e-05	0.000547279
ENSG00000171792	RHNO1	1514.53	-0.235408	5.27853e-05	0.000549436
ENSG00000006459	KDM7A	618.176	0.373969	5.29916e-05	0.000551257
ENSG00000174099	MSRB3	71.4402	0.824219	5.30232e-05	0.00055126
ENSG00000170017	ALCAM	3690.98	0.230712	5.3081e-05	0.000551534
ENSG00000204256	BRD2	4486.6	-0.127527	5.31221e-05	0.000551636
ENSG00000206190	ATP10A	557.427	-0.286175	5.31609e-05	0.000551713
ENSG00000101361	NOP56	7549.48	-0.265818	5.37017e-05	0.000556822
ENSG00000119335	SET	18338.6	-0.196611	5.37413e-05	0.000556822
ENSG00000163702	IL17RC	954.012	0.335682	5.37482e-05	0.000556822
ENSG00000155090	KLF10	634.05	-0.290165	5.38399e-05	0.000557444
ENSG00000171522	PTGER4	75.1184	-1.00877	5.41637e-05	0.000560466
ENSG00000172175	MALT1	1583.53	-0.350265	5.50813e-05	0.000569627
ENSG00000136492	BRIP1	785.32	-0.416784	5.58446e-05	0.000577181
ENSG00000089289	IGBP1	1328.6	0.303404	5.60189e-05	0.000578491
ENSG00000164733	CTSB	3324.32	0.251159	5.60371e-05	0.000578491
ENSG00000113916	BCL6	2495.65	0.200343	5.61223e-05	0.000579031
ENSG00000203724	C1orf53	171.2	0.58474	5.64097e-05	0.000581655
ENSG00000104154	SLC30A4	10166.3	0.317887	5.67338e-05	0.000584654
ENSG00000145087	STXBP5L	7843.66	0.306326	5.71386e-05	0.00058848
ENSG00000184886	NA	102.825	-0.581935	5.73636e-05	0.000590452
ENSG00000113621	TXNDC15	1456.76	0.27144	5.79587e-05	0.000596229
ENSG00000070950	RAD18	1088.79	-0.419828	5.80986e-05	0.000596969
ENSG00000172315	TP53RK	1240.34	-0.257508	5.80735e-05	0.000596969
ENSG00000135124	P2RX4	643.272	0.333782	5.906e-05	0.000606494
ENSG00000259072	AL161751.1	20.2917	1.52964	5.92574e-05	0.000608166
ENSG00000143590	EFNA3	333.692	0.468314	5.93843e-05	0.000609113
ENSG00000107819	SFXN3	833.708	0.274238	5.95462e-05	0.000610418
ENSG00000162889	MAPKAPK2	1039.5	0.253639	5.96187e-05	0.000610806
ENSG00000042088	TDP1	2651.54	-0.175649	6.00807e-05	0.000614107
ENSG00000142528	ZNF473	891.239	-0.26605	6.00055e-05	0.000614107
ENSG00000160049	DFFA	2508.64	-0.199327	6.00614e-05	0.000614107
ENSG00000186594	MIR22HG	154.466	0.557036	6.00243e-05	0.000614107
ENSG00000156508	EEF1A1	83897.1	0.243107	6.07769e-05	0.000620863
ENSG00000149548	CCDC15	599.03	-0.347829	6.08171e-05	0.000620913
ENSG00000115041	KCNIP3	123.507	0.663465	6.10688e-05	0.000623121
ENSG00000147649	MTDH	6732.03	-0.199006	6.12988e-05	0.000625106
ENSG00000213516	RBMXL1	932.594	-0.307463	6.15162e-05	0.000626959
ENSG00000181722	ZBTB20	129.85	0.606836	6.16311e-05	0.000627766
ENSG00000156113	KCNMA1	3148.81	-0.189693	6.21543e-05	0.000632729
ENSG00000141682	PMAIP1	342.408	0.380012	6.23791e-05	0.000634651
ENSG00000183765	CHEK2	1027.93	-0.266127	6.25281e-05	0.000635799
ENSG00000261455	LINC01003	193.962	0.524259	6.26306e-05	0.000636473
ENSG00000068323	TFE3	523.548	0.333846	6.27723e-05	0.000637545
ENSG00000138101	DTNB	1650.18	0.236693	6.3345e-05	0.00064299
ENSG00000181163	NPM1	37994.3	-0.231899	6.36016e-05	0.000645223
ENSG00000120526	NUDCD1	715.339	-0.428699	6.38194e-05	0.000646686
ENSG00000242732	RTL5	176.108	0.630468	6.37837e-05	0.000646686
ENSG00000155066	PROM2	2247.32	0.292353	6.4088e-05	0.000649033
ENSG00000146540	C7orf50	2574.81	0.3808	6.43465e-05	0.000650903
ENSG00000148450	MSRB2	695.276	0.377853	6.43162e-05	0.000650903
ENSG00000166004	CEP295	3103.16	-0.305504	6.46321e-05	0.000653416
ENSG00000065548	ZC3H15	2048.39	-0.308024	6.47215e-05	0.000653944
ENSG00000172296	SPTLC3	592.442	0.37023	6.54218e-05	0.00066064
ENSG00000169251	NMD3	763.392	-0.337597	6.57033e-05	0.000663102
ENSG00000135127	BICDL1	378.711	0.468456	6.6103e-05	0.000666754
ENSG00000138166	DUSP5	123.149	0.554515	6.64049e-05	0.000669414
ENSG00000015479	MATR3	13308.5	-0.203226	6.64473e-05	0.000669459
ENSG00000135677	GNS	5078.52	0.167242	6.64966e-05	0.000669571
ENSG00000265666	RARA-AS1	53.6463	0.94171	6.6896e-05	0.000673208
ENSG00000162755	KLHDC9	244.183	0.489646	6.6991e-05	0.000673778
ENSG00000122085	MTERF4	2799.5	-0.162054	6.79398e-05	0.00068293
ENSG00000158828	PINK1	562.607	0.426637	6.83616e-05	0.000686778
ENSG00000164850	GPER1	725.347	0.349903	6.85321e-05	0.000688098
ENSG00000213719	CLIC1	2742.47	0.369091	6.86581e-05	0.000688971
ENSG00000147403	RPL10	17307.1	0.340109	6.9054e-05	0.000692548
ENSG00000133943	DGLUCY	678.8	0.342183	6.97794e-05	0.000699424
ENSG00000171208	NETO2	2404.12	-0.266578	7.0091e-05	0.000702147
ENSG00000167658	EEF2	127785	0.252308	7.05778e-05	0.000706622
ENSG00000170348	TMED10	7746.75	0.25104	7.07846e-05	0.000708289
ENSG00000048828	FAM120A	11018.4	-0.135076	7.10581e-05	0.000710621
ENSG00000053918	KCNQ1	181.125	0.661191	7.13652e-05	0.000713287
ENSG00000267750	RUNDC3A-AS1	247.212	0.448923	7.18356e-05	0.000717581
ENSG00000158710	TAGLN2	4660.21	-0.267885	7.21767e-05	0.000720579
ENSG00000057608	GDI2	9996.56	-0.217744	7.28213e-05	0.000726602
ENSG00000101400	SNTA1	1052.87	0.351032	7.31768e-05	0.000729399
ENSG00000172943	PHF8	1595.06	-0.265867	7.31845e-05	0.000729399
ENSG00000070882	OSBPL3	523.407	-0.3258	7.371e-05	0.00073422
ENSG00000174197	MGA	5050.44	-0.203069	7.39744e-05	0.000736437
ENSG00000005513	SOX8	400.178	0.414124	7.47527e-05	0.000743764
ENSG00000150995	ITPR1	1001.25	0.300076	7.52857e-05	0.000748644
ENSG00000161905	ALOX15	2050.26	0.196846	7.55099e-05	0.000750449
ENSG00000023572	GLRX2	448.63	-0.604779	7.56019e-05	0.000750939
ENSG00000162851	TFB2M	1195.89	-0.232474	7.56736e-05	0.000751227
ENSG00000172456	FGGY	426.034	0.368718	7.59496e-05	0.000753542
ENSG00000219329	AL357515.1	32.4613	1.21368	7.61637e-05	0.00075524
ENSG00000171320	ESCO2	1195.2	-0.490399	7.68678e-05	0.000761793
ENSG00000132768	DPH2	1443.93	-0.296872	7.76924e-05	0.000769098
ENSG00000170266	GLB1	1401.62	0.243018	7.76731e-05	0.000769098
ENSG00000139354	GAS2L3	578.114	-0.448543	7.83177e-05	0.000774852
ENSG00000130147	SH3BP4	1497.16	0.218578	7.84206e-05	0.000775434
ENSG00000011260	UTP18	1806.67	-0.254838	7.8793e-05	0.000778678
ENSG00000138346	DNA2	1121.71	-0.401264	7.91759e-05	0.000782024
ENSG00000272468	AL021807.1	197.978	-0.452722	7.93084e-05	0.000782893
ENSG00000256417	AC006206.2	102.006	0.745698	7.99594e-05	0.000788876
ENSG00000112667	DNPH1	495.581	0.490585	8.06396e-05	0.000794594
ENSG00000124839	RAB17	794.699	0.356505	8.06745e-05	0.000794594
ENSG00000170191	NANP	476.083	-0.392672	8.06456e-05	0.000794594
ENSG00000183580	FBXL7	70.3119	0.747401	8.08307e-05	0.000795687
ENSG00000179082	C9orf106	151.345	0.570726	8.08951e-05	0.000795761
ENSG00000213385	AC105052.2	34.5303	-1.0797	8.09287e-05	0.000795761
ENSG00000120265	PCMT1	1441.62	-0.256347	8.11109e-05	0.000796662
ENSG00000228594	FNDC10	1705.85	0.341448	8.11046e-05	0.000796662
ENSG00000124795	DEK	3424.43	-0.445729	8.12665e-05	0.000797745
ENSG00000065485	PDIA5	1542.49	-0.212111	8.19532e-05	0.000803891
ENSG00000159079	CFAP298	240.879	-0.391948	8.1984e-05	0.000803891
ENSG00000251562	MALAT1	350137	0.617549	8.20328e-05	0.000803922
ENSG00000001461	NIPAL3	2262.89	0.172991	8.26961e-05	0.000809971
ENSG00000181754	AMIGO1	232.562	0.419051	8.36715e-05	0.000819068
ENSG00000058262	SEC61A1	17478.8	0.163171	8.41863e-05	0.00082365
ENSG00000188938	FAM120AOS	2273.32	0.197891	8.46267e-05	0.000827498
ENSG00000196419	XRCC6	17604.3	-0.215814	8.49866e-05	0.000830555
ENSG00000137812	KNL1	1953.26	-0.453398	8.54552e-05	0.000834671
ENSG00000121281	ADCY7	85.1512	0.767172	8.57019e-05	0.000836616
ENSG00000107175	CREB3	934.718	0.381555	8.59788e-05	0.000837925
ENSG00000170836	PPM1D	834.344	-0.23485	8.59705e-05	0.000837925
ENSG00000172292	CERS6	4203.71	-0.322981	8.59789e-05	0.000837925
ENSG00000169223	LMAN2	4032.15	0.30533	8.60893e-05	0.000838536
ENSG00000136122	BORA	121.312	-0.609056	8.65556e-05	0.000842146
ENSG00000179218	CALR	27741.6	0.250246	8.65173e-05	0.000842146
ENSG00000132846	ZBED3	1472.8	0.239151	8.68513e-05	0.000844556
ENSG00000132196	HSD17B7	553.393	0.316381	8.69801e-05	0.00084534
ENSG00000138035	PNPT1	1388.86	-0.419903	8.77483e-05	0.000852336
ENSG00000003436	TFPI	1635.3	-0.421742	8.80397e-05	0.000854695
ENSG00000196290	NIF3L1	923.377	-0.284433	8.86973e-05	0.000860603
ENSG00000055130	CUL1	2705.69	-0.190135	8.94997e-05	0.000867911
ENSG00000101343	CRNKL1	1628.45	-0.27052	9.00629e-05	0.00087289
ENSG00000100036	SLC35E4	189.806	0.478216	9.03366e-05	0.000875043
ENSG00000215301	DDX3X	11489.5	-0.229381	9.03845e-05	0.000875043
ENSG00000092377	TBL1Y	84.3792	0.685992	9.08307e-05	0.000877914
ENSG00000165548	TMEM63C	656.993	0.327816	9.07473e-05	0.000877914
ENSG00000215375	MYL5	685.111	0.400841	9.08006e-05	0.000877914
ENSG00000127334	DYRK2	589.538	-0.38521	9.1075e-05	0.000879792
ENSG00000167306	MYO5B	745.797	0.33241	9.19023e-05	0.000887296
ENSG00000266947	AC022916.1	128.355	0.526077	9.20986e-05	0.000888703
ENSG00000125966	MMP24	70.0048	0.786657	9.32685e-05	0.000899499
ENSG00000178038	ALS2CL	103.618	0.760602	9.36862e-05	0.000903032
ENSG00000075240	GRAMD4	541.142	0.415043	9.52509e-05	0.000917255
ENSG00000188167	TMPPE	977.385	-0.276201	9.5266e-05	0.000917255
ENSG00000129351	ILF3	15394.8	-0.241061	9.56292e-05	0.000920248
ENSG00000111707	SUDS3	2574.33	-0.15553	9.60662e-05	0.000923948
ENSG00000196449	YRDC	1127.78	-0.216905	9.61492e-05	0.000924241
ENSG00000102547	CAB39L	2499.13	-0.262722	9.6505e-05	0.000927154
ENSG00000085872	CHERP	2916.98	-0.287813	9.66471e-05	0.000928013
ENSG00000137822	TUBGCP4	981.366	-0.221689	9.76146e-05	0.000936791
ENSG00000162078	ZG16B	1724.04	0.314747	9.86494e-05	0.000946206
ENSG00000114248	LRRC31	36.2909	1.20471	9.87292e-05	0.000946455
ENSG00000116209	TMEM59	3467.31	0.253689	9.88325e-05	0.000946929
ENSG00000132388	UBE2G1	2489.93	-0.298418	9.89435e-05	0.000947477
ENSG00000170855	TRIAP1	1473.94	-0.321538	9.92359e-05	0.00094976
ENSG00000144026	ZNF514	354.631	0.359126	9.9477e-05	0.000951032
ENSG00000224411	HSP90AA2P	92.7138	-0.625142	9.94493e-05	0.000951032
ENSG00000109674	NEIL3	370.683	-0.444305	9.96689e-05	0.00095235
ENSG00000148832	PAOX	116.484	0.690311	0.000100025	0.000955237
ENSG00000100299	ARSA	349.182	0.436901	0.000100524	0.000959474
ENSG00000117877	CD3EAP	998.352	-0.470477	0.000101493	0.0009682
ENSG00000109881	CCDC34	859.033	-0.335884	0.000101695	0.000969599
ENSG00000185475	TMEM179B	1681.66	0.326733	0.000101911	0.000971133
ENSG00000073350	LLGL2	1410.45	0.357815	0.000102925	0.000980265
ENSG00000272449	AL139246.5	242.631	0.598181	0.000102986	0.000980321
ENSG00000144791	LIMD1	4703.46	-0.16005	0.000103498	0.000984663
ENSG00000264175	MIR3189	25.2805	1.32237	0.000103821	0.000987199
ENSG00000120685	PROSER1	2219.73	-0.223486	0.000103921	0.000987611
ENSG00000242407	AC091179.1	196.076	0.446961	0.000104577	0.000993308
ENSG00000109861	CTSC	128.228	-0.569085	0.000104656	0.00099353
ENSG00000153147	SMARCA5	3517.7	-0.23357	0.000104799	0.000994345
ENSG00000083635	NUFIP1	481.322	-0.314683	0.00010587	0.00100397
ENSG00000159147	DONSON	289.607	-0.388517	0.000106633	0.00101066
ENSG00000213445	SIPA1	550.853	0.403993	0.000107421	0.00101758
ENSG00000168936	TMEM129	1365.42	0.300719	0.000107607	0.00101879
ENSG00000124383	MPHOSPH10	912.96	-0.368952	0.00010816	0.00102347
ENSG00000183255	PTTG1IP	3540.23	0.218547	0.000108523	0.00102636
ENSG00000025800	KPNA6	4593.05	-0.159125	0.000108727	0.00102719
ENSG00000196550	FAM72A	73.9426	-0.720821	0.000108727	0.00102719
ENSG00000067182	TNFRSF1A	1858.9	0.256933	0.000108917	0.00102842
ENSG00000000460	C1orf112	701.653	-0.323791	0.000110105	0.00103908
ENSG00000142556	ZNF614	987.415	-0.300561	0.000110437	0.00104166
ENSG00000053372	MRTO4	1638.1	-0.258275	0.000110637	0.00104298
ENSG00000166946	CCNDBP1	655.445	0.293505	0.000110857	0.0010445
ENSG00000140391	TSPAN3	2571.34	0.229616	0.000111096	0.0010462
ENSG00000176454	LPCAT4	353.733	0.358259	0.000111808	0.00105234
ENSG00000149823	VPS51	2428.55	0.312816	0.000112555	0.00105857
ENSG00000197380	DACT3	50.0287	0.865685	0.000112591	0.00105857
ENSG00000070614	NDST1	6064.16	-0.170443	0.000112735	0.00105879
ENSG00000123384	LRP1	988.706	0.48901	0.000112713	0.00105879
ENSG00000186230	ZNF749	659.064	-0.263513	0.000116248	0.0010912
ENSG00000125124	BBS2	1387.23	0.230822	0.000116627	0.00109318
ENSG00000149547	EI24	7544.4	-0.175189	0.000116556	0.00109318
ENSG00000176907	TCIM	22.7844	1.43059	0.000116645	0.00109318
ENSG00000091483	FH	4484.54	-0.237548	0.000116826	0.00109429
ENSG00000174938	SEZ6L2	2564.84	0.262876	0.000116895	0.00109436
ENSG00000158402	CDC25C	725.368	-0.304953	0.000116962	0.00109441
ENSG00000204519	ZNF551	1143.26	-0.226135	0.000117579	0.00109909
ENSG00000213967	ZNF726	710.069	-0.291024	0.000117588	0.00109909
ENSG00000110002	VWA5A	99.4106	0.644971	0.000117951	0.0011019
ENSG00000139131	YARS2	991.401	-0.225188	0.000118854	0.00110974
ENSG00000168300	PCMTD1	770.905	0.393097	0.000119391	0.00111416
ENSG00000160201	U2AF1	3213.83	-0.180026	0.000119597	0.0011155
ENSG00000115761	NOL10	1326.42	-0.257247	0.000120041	0.00111904
ENSG00000162623	TYW3	1633.26	-0.300452	0.000120116	0.00111916
ENSG00000169660	HEXDC	283.953	0.412556	0.000120608	0.00112315
ENSG00000129007	CALML4	371.086	-0.461015	0.000120809	0.00112442
ENSG00000108641	B9D1	179.625	0.471391	0.000121489	0.00113015
ENSG00000004700	RECQL	1156.71	-0.369392	0.000123304	0.00114643
ENSG00000162231	NXF1	2476.63	-0.217724	0.000123827	0.00115068
ENSG00000171649	ZIK1	1206.64	-0.209272	0.000124815	0.00115925
ENSG00000160785	SLC25A44	2157.4	-0.181244	0.000125247	0.00116265
ENSG00000173456	RNF26	2992.74	-0.226049	0.000126033	0.00116933
ENSG00000101236	RNF24	1433.33	0.206534	0.00012672	0.00117414
ENSG00000131873	CHSY1	2169.15	-0.192694	0.000126833	0.00117414
ENSG00000138381	ASNSD1	1342.53	-0.418856	0.000126867	0.00117414
ENSG00000143748	NVL	2724.94	-0.152743	0.000126885	0.00117414
ENSG00000155850	SLC26A2	1179.86	-0.405617	0.000126746	0.00117414
ENSG00000197355	UAP1L1	538.914	0.388807	0.000127006	0.00117464
ENSG00000173588	CEP83	543.568	-0.385526	0.000127357	0.00117726
ENSG00000161277	THAP8	135.285	0.532163	0.000129839	0.00119958
ENSG00000100519	PSMC6	2468.64	-0.223967	0.000130055	0.00120031
ENSG00000141378	PTRH2	1335.35	-0.232018	0.000130049	0.00120031
ENSG00000111684	LPCAT3	1770.09	0.199322	0.000130174	0.00120078
ENSG00000132330	SCLY	252.323	-0.471949	0.000132525	0.00122183
ENSG00000011677	GABRA3	218.114	0.420766	0.000132735	0.00122312
ENSG00000105849	TWISTNB	1000.98	-0.397608	0.000132853	0.00122357
ENSG00000135972	MRPS9	1236.37	-0.203096	0.000133065	0.00122488
ENSG00000133216	EPHB2	448.971	0.336104	0.000133465	0.00122728
ENSG00000160310	PRMT2	1135.91	0.249345	0.000133456	0.00122728
ENSG00000042980	ADAM28	15.8165	-1.37221	0.000133703	0.00122883
ENSG00000213676	ATF6B	321.643	0.411044	0.000133902	0.00123001
ENSG00000165572	KBTBD6	1556.85	-0.193533	0.000134975	0.00123922
ENSG00000137133	HINT2	1994.85	0.359953	0.000135076	0.0012395
ENSG00000140479	PCSK6	1474.05	0.212754	0.00013609	0.00124815
ENSG00000164134	NAA15	2576.05	-0.415323	0.000136626	0.00124988
ENSG00000170027	YWHAG	13942.9	-0.191125	0.000136594	0.00124988
ENSG00000171940	ZNF217	6614.31	0.167798	0.000136544	0.00124988
ENSG00000176731	C8orf59	1206.48	-0.434128	0.000136602	0.00124988
ENSG00000196187	TMEM63A	907.235	0.267405	0.000136634	0.00124988
ENSG00000130313	PGLS	1266.11	0.380814	0.000136938	0.00125202
ENSG00000141542	RAB40B	472.392	0.312275	0.000137712	0.00125844
ENSG00000179241	LDLRAD3	961.342	-0.243227	0.000137955	0.00126
ENSG00000128708	HAT1	2121.1	-0.537954	0.000138329	0.00126231
ENSG00000171124	FUT3	31.2894	1.02029	0.000138351	0.00126231
ENSG00000141867	BRD4	5571.24	-0.235412	0.000139353	0.00127079
ENSG00000261770	AC006504.1	402.792	0.518348	0.00013994	0.00127549
ENSG00000118816	CCNI	15391.2	0.245869	0.000140104	0.00127631
ENSG00000196968	FUT11	623.7	-0.302589	0.000141766	0.00129079
ENSG00000161021	MAML1	2500.91	-0.181341	0.000142582	0.00129754
ENSG00000165699	TSC1	1895.52	0.179032	0.000144469	0.00131404
ENSG00000184863	RBM33	2134.09	-0.181031	0.000145195	0.00131996
ENSG00000101811	CSTF2	1087.9	-0.258051	0.000146183	0.00132826
ENSG00000161888	SPC24	3299.48	-0.227928	0.000146452	0.00133001
ENSG00000163703	CRELD1	680.51	0.293644	0.000147002	0.00133432
ENSG00000174010	KLHL15	628.683	-0.360934	0.000147458	0.00133777
ENSG00000165591	FAAH2	222.924	0.449981	0.000147605	0.00133841
ENSG00000096401	CDC5L	1522.25	-0.203685	0.00014834	0.00134438
ENSG00000136636	KCTD3	1856.09	-0.200676	0.000148897	0.00134874
ENSG00000115816	CEBPZ	1593.22	-0.365844	0.000149375	0.00135237
ENSG00000137962	ARHGAP29	2262.86	0.443036	0.000149494	0.00135275
ENSG00000065526	SPEN	4593.41	-0.264098	0.000149901	0.00135504
ENSG00000185104	FAF1	2661.03	-0.168985	0.000149885	0.00135504
ENSG00000185900	POMK	2257.32	-0.199505	0.0001507	0.00136156
ENSG00000205593	DENND6B	200.188	0.49475	0.000151583	0.00136884
ENSG00000169359	SLC33A1	2491.18	0.204728	0.000152052	0.00137237
ENSG00000073146	MOV10L1	12.9441	1.76446	0.000152437	0.00137443
ENSG00000143977	SNRPG	1561.89	-0.355434	0.000152397	0.00137443
ENSG00000119227	PIGZ	54.7809	0.927243	0.000152855	0.0013775
ENSG00000137513	NARS2	1044.38	-0.226641	0.000153379	0.00138133
ENSG00000197448	GSTK1	1101.6	0.321155	0.000153437	0.00138133
ENSG00000099999	RNF215	401.434	0.359548	0.000153622	0.00138228
ENSG00000080345	RIF1	3490.67	-0.472321	0.000154531	0.00138975
ENSG00000121060	TRIM25	4080.42	0.164167	0.000154933	0.00139265
ENSG00000251136	AF117829.1	221.741	0.488846	0.000155493	0.00139698
ENSG00000128059	PPAT	2321.85	-0.308216	0.00015608	0.00140082
ENSG00000136379	ABHD17C	475.177	-0.369085	0.000156021	0.00140082
ENSG00000033867	SLC4A7	2436.68	-0.363492	0.000156595	0.00140472
ENSG00000090447	TFAP4	1176.6	-0.270013	0.000157283	0.00141017
ENSG00000132698	RAB25	1801.31	0.351609	0.000158337	0.00141891
ENSG00000059378	PARP12	630.003	0.2781	0.000158895	0.00142317
ENSG00000110237	ARHGEF17	1007.99	0.315009	0.000159002	0.00142341
ENSG00000172915	NBEA	392.431	0.439827	0.000159388	0.00142614
ENSG00000006576	PHTF2	1091.72	-0.412587	0.000159865	0.00142968
ENSG00000213341	CHUK	758.769	-0.29498	0.000159976	0.00142995
ENSG00000261183	SPINT1-AS1	332.077	0.488197	0.000161146	0.00143967
ENSG00000204103	MAFB	2971.02	0.151015	0.000161382	0.00144105
ENSG00000091127	PUS7	1551.02	-0.220271	0.000162001	0.00144511
ENSG00000166797	CIAO2A	1208.64	-0.272219	0.000161969	0.00144511
ENSG00000104774	MAN2B1	1420.41	0.262472	0.000162141	0.00144562
ENSG00000119969	HELLS	1964.05	-0.504144	0.000162776	0.00145055
ENSG00000125827	TMX4	2969.12	-0.232352	0.000164177	0.00146229
ENSG00000136522	MRPL47	2075.47	-0.252815	0.000164339	0.001463
ENSG00000101146	RAE1	1443.43	-0.230563	0.000164657	0.00146509
ENSG00000254966	AC103974.1	9.21081	2.96359	0.000164762	0.00146528
ENSG00000127955	GNAI1	1675.77	-0.282443	0.000164849	0.00146532
ENSG00000142892	PIGK	1385.8	-0.361913	0.000166474	0.00147901
ENSG00000160200	CBS	5985.44	0.40262	0.000170482	0.00151385
ENSG00000054690	PLEKHH1	2308.74	0.224177	0.000170606	0.00151419
ENSG00000143575	HAX1	4322.96	0.334039	0.000170815	0.00151528
ENSG00000171492	LRRC8D	1781.69	0.33415	0.000171846	0.00152366
ENSG00000144655	CSRNP1	754.462	0.270298	0.000173016	0.00153326
ENSG00000163412	EIF4E3	327.243	0.387287	0.000173889	0.00154023
ENSG00000113356	POLR3G	327.065	-0.3485	0.000174015	0.00154056
ENSG00000273290	NA	287.047	-0.427174	0.000174887	0.0015475
ENSG00000065135	GNAI3	2521.34	-0.289851	0.000175133	0.0015489
ENSG00000099995	SF3A1	6964.6	-0.21359	0.000175399	0.00155047
ENSG00000104164	BLOC1S6	3814.2	0.287303	0.000175611	0.00155097
ENSG00000105447	GRWD1	1562.23	-0.243045	0.000175632	0.00155097
ENSG00000025708	TYMP	192.22	0.682649	0.000175998	0.00155342
ENSG00000146373	RNF217	74.5372	0.736037	0.00017761	0.00156687
ENSG00000110075	PPP6R3	4949.11	-0.219557	0.000178119	0.00157057
ENSG00000267278	MAP3K14-AS1	193.907	0.477415	0.000180299	0.001589
ENSG00000120314	WDR55	2105.62	-0.165255	0.000180703	0.00159176
ENSG00000183530	PRR14L	4808.95	-0.175497	0.000180805	0.00159186
ENSG00000125834	STK35	3704.09	-0.168747	0.000181919	0.00159949
[truncated: 55,861 more rows]

## Sheet: 24h_1ae_0p5uM_vsDMSO
GeneID	Gene	baseMean	log2FoldChange	pvalue	padj
ENSG00000155657	TTN	763.523	-1.70467	2.01727e-29	2.92444e-25
ENSG00000163492	CCDC141	217.154	-1.47179	1.68755e-25	1.22322e-21
ENSG00000096060	FKBP5	3471.3	-0.673883	7.49186e-24	3.62032e-20
ENSG00000135862	LAMC1	9983.69	-0.334581	1.38806e-22	5.03069e-19
ENSG00000123983	ACSL3	6158.63	-0.474499	8.03831e-19	2.33063e-15
ENSG00000106070	GRB10	19411.5	0.34638	1.35079e-17	3.26373e-14
ENSG00000163110	PDLIM5	4298.44	-0.287241	4.46428e-17	9.24552e-14
ENSG00000198648	STK39	3850.22	-0.311129	8.18437e-17	1.48311e-13
ENSG00000116574	RHOU	1564.41	-0.432024	1.84915e-16	2.97857e-13
ENSG00000124225	PMEPA1	4172.04	-0.435027	4.31848e-16	6.2605e-13
ENSG00000178573	MAF	198.414	-0.91166	1.36225e-15	1.79532e-12
ENSG00000070526	ST6GALNAC1	1544.12	-0.609616	2.43788e-15	2.94517e-12
ENSG00000184012	TMPRSS2	3565.38	-0.380827	8.0449e-15	8.9713e-12
ENSG00000103942	HOMER2	5312.61	-0.238706	3.12523e-14	3.23617e-11
ENSG00000167751	KLK2	5507.81	-0.476965	1.33028e-13	1.28567e-10
ENSG00000144218	AFF3	1453.91	-0.465372	2.4534e-13	2.22293e-10
ENSG00000198734	F5	292.54	-0.883855	3.54251e-13	3.02093e-10
ENSG00000158715	SLC45A3	7519.29	-0.343432	4.71055e-13	3.79383e-10
ENSG00000069206	ADAM7	460.337	-0.695653	1.24163e-12	8.95182e-10
ENSG00000154144	TBRG1	3999.7	-0.299865	1.29674e-12	8.95182e-10
ENSG00000167034	NKX3-1	13334.4	-0.331577	1.28758e-12	8.95182e-10
ENSG00000140443	IGF1R	6656.11	-0.420923	3.68507e-12	2.4283e-09
ENSG00000104419	NDRG1	2398.85	-0.383576	6.23304e-12	3.92871e-09
ENSG00000137801	THBS1	1123.99	-0.43133	1.22847e-11	7.42048e-09
ENSG00000182795	C1orf116	6975.32	-0.247524	1.37651e-11	7.98208e-09
ENSG00000169122	FAM110B	1453.78	-0.285684	1.66134e-11	9.26326e-09
ENSG00000142515	KLK3	17049.7	-0.386678	3.12218e-11	1.67638e-08
ENSG00000118985	ELL2	3594.42	-0.400908	3.93578e-11	2.03775e-08
ENSG00000145569	OTULINL	789.291	-0.524842	4.35973e-11	2.17941e-08
ENSG00000151025	GPR158	3940.1	-0.287927	1.71829e-10	8.30337e-08
ENSG00000103222	ABCC1	6084.64	-0.313032	2.06043e-10	9.63552e-08
ENSG00000182319	NA	475.25	-0.604335	2.20472e-10	9.98809e-08
ENSG00000132437	DDC	3642.51	0.340065	6.16181e-10	2.6585e-07
ENSG00000197888	UGT2B17	2234.09	0.521302	6.23501e-10	2.6585e-07
ENSG00000154734	ADAMTS1	14561.8	-0.213174	1.04509e-09	4.32877e-07
ENSG00000136783	NIPSNAP3A	1414.91	0.476313	1.64007e-09	6.60449e-07
ENSG00000144476	ACKR3	2098.74	0.370831	1.97848e-09	7.75189e-07
ENSG00000002834	LASP1	3086.24	0.310488	2.33998e-09	8.92702e-07
ENSG00000120903	CHRNA2	879.96	-0.507144	9.93432e-09	3.69276e-06
ENSG00000196620	UGT2B15	718.628	0.550502	1.02971e-08	3.73194e-06
ENSG00000125257	ABCC4	5579.74	-0.369704	1.98539e-08	7.02004e-06
ENSG00000166451	CENPN	2512.07	-0.297629	2.71e-08	9.354e-06
ENSG00000163171	CDC42EP3	1451.33	-0.32858	4.50258e-08	1.518e-05
ENSG00000140526	ABHD2	25298.1	-0.254621	6.37795e-08	2.10139e-05
ENSG00000157600	TMEM164	3368.66	-0.25488	7.58897e-08	2.44483e-05
ENSG00000162545	CAMK2N1	756.127	0.430318	8.22333e-08	2.5916e-05
ENSG00000175928	LRRN1	1730.83	0.346765	8.64365e-08	2.6661e-05
ENSG00000144481	TRPM8	1022.72	-0.36819	9.53871e-08	2.88089e-05
ENSG00000101680	LAMA1	164.48	-0.64947	9.79899e-08	2.8991e-05
ENSG00000163406	SLC15A2	140.739	-0.681671	1.04099e-07	3.01824e-05
ENSG00000147408	CSGALNACT1	101.598	-0.895097	1.14135e-07	3.24435e-05
ENSG00000181467	RAP2B	1803.01	0.287454	1.70872e-07	4.76371e-05
ENSG00000145779	TNFAIP8	529.357	-0.431116	1.74849e-07	4.78261e-05
ENSG00000009694	TENM1	528.581	-0.63066	6.07035e-07	0.000162966
ENSG00000196208	GREB1	1051.82	-0.434022	6.82256e-07	0.00017983
ENSG00000144331	ZNF385B	1478.53	-0.234819	9.32396e-07	0.000239297
ENSG00000183666	GUSBP1	1916.52	0.257448	9.40878e-07	0.000239297
ENSG00000166446	CDYL2	1757.98	-0.249691	1.00864e-06	0.000252108
ENSG00000141027	NCOR1	11784.6	-0.178441	1.24869e-06	0.000306817
ENSG00000138641	HERC3	7235.46	-0.259555	1.28753e-06	0.000311088
ENSG00000109452	INPP4B	530.48	-0.416609	1.40609e-06	0.000334166
ENSG00000116991	SIPA1L2	2068.97	-0.214407	1.86631e-06	0.000429924
ENSG00000135596	MICAL1	535.908	-0.505758	1.86833e-06	0.000429924
ENSG00000138696	BMPR1B	311.501	-0.454228	2.07922e-06	0.000470976
ENSG00000151503	NCAPD3	5598.82	-0.17464	2.66741e-06	0.000594915
ENSG00000116667	C1orf21	1724.63	-0.195478	2.96355e-06	0.000650948
ENSG00000065882	TBC1D1	3072.95	-0.199359	3.1749e-06	0.000686964
ENSG00000133065	SLC41A1	2779.8	-0.224785	3.96187e-06	0.000844637
ENSG00000144749	LRIG1	2094.33	-0.211369	4.1849e-06	0.000879254
ENSG00000148700	ADD3	3470.89	0.261694	5.24033e-06	0.00108527
ENSG00000116133	DHCR24	24603.5	-0.221	5.92447e-06	0.00119288
ENSG00000125266	EFNB2	1148.79	-0.27941	5.87678e-06	0.00119288
ENSG00000144339	TMEFF2	1729.08	-0.241587	6.03006e-06	0.0011975
ENSG00000166387	PPFIBP2	1679.03	-0.240822	7.42977e-06	0.00145553
ENSG00000138801	PAPSS1	2024.53	0.183801	8.87265e-06	0.00171502
ENSG00000110841	PPFIBP1	2184.32	-0.253916	9.12785e-06	0.00174114
ENSG00000080709	KCNN2	4952.14	-0.206195	9.85508e-06	0.00180847
ENSG00000135090	TAOK3	3634.43	-0.19895	9.7471e-06	0.00180847
ENSG00000224186	C5orf66	427.358	0.422998	9.70523e-06	0.00180847
ENSG00000166292	TMEM100	40.4651	-1.39511	1.05049e-05	0.00190363
ENSG00000127954	STEAP4	29.8884	-1.29344	1.14088e-05	0.0020419
ENSG00000141179	PCTP	436.879	-0.360268	1.28585e-05	0.00227329
ENSG00000039139	DNAH5	645.23	-0.366684	1.38489e-05	0.00241889
ENSG00000154122	ANKH	3082.32	-0.17789	1.54084e-05	0.00265923
ENSG00000093167	LRRFIP2	1776.18	-0.170374	1.96158e-05	0.00334554
ENSG00000092607	TBX15	57.5514	-0.793189	2.20973e-05	0.00372494
ENSG00000156113	KCNMA1	3148.81	-0.197849	3.04091e-05	0.00506714
ENSG00000035862	TIMP2	804.997	0.302068	3.44625e-05	0.00567731
ENSG00000170122	FOXD4	252.114	-0.428165	3.6506e-05	0.00594637
ENSG00000134765	DSC1	97.2719	-0.637416	3.70663e-05	0.00597055
ENSG00000172771	EFCAB12	495.03	-0.369383	4.20722e-05	0.00670242
ENSG00000099250	NRP1	4399.8	-0.185052	4.30808e-05	0.00678851
ENSG00000153179	RASSF3	17946	-0.199811	4.38008e-05	0.00682774
ENSG00000103257	SLC7A5	1822.73	0.254355	5.73896e-05	0.00885082
ENSG00000064042	LIMCH1	19881.1	-0.170277	5.88375e-05	0.0089786
ENSG00000224689	ZNF812P	131.839	-0.581741	5.98153e-05	0.00903273
ENSG00000162174	ASRGL1	1187.28	-0.294612	6.36934e-05	0.00951921
ENSG00000164125	FAM198B	3307.67	0.314342	7.47993e-05	0.011065
ENSG00000175471	MCTP1	87.1632	0.743588	7.85923e-05	0.0115086
ENSG00000081803	CADPS2	653.1	-0.277333	8.11173e-05	0.0116431
ENSG00000169213	RAB3B	4197.35	-0.190744	8.06155e-05	0.0116431
ENSG00000155846	PPARGC1B	1350.52	-0.248863	8.39675e-05	0.0119341
ENSG00000139209	SLC38A4	42.6983	-0.885987	8.58252e-05	0.0120797
ENSG00000132142	NA	15508.9	-0.182967	8.79957e-05	0.0122051
ENSG00000135226	UGT2B28	35.7057	-0.978642	8.92421e-05	0.0122051
ENSG00000204128	C2orf72	202.984	-0.55918	8.86048e-05	0.0122051
ENSG00000065485	PDIA5	1542.49	-0.210518	9.544e-05	0.012811
ENSG00000171517	LPAR3	2203.83	-0.21802	9.50364e-05	0.012811
ENSG00000154229	PRKCA	893.138	-0.226327	0.000102055	0.0135733
ENSG00000138771	SHROOM3	7714.3	-0.159493	0.000109271	0.0144009
ENSG00000143153	ATP1B1	5391.87	0.252687	0.000124147	0.016214
ENSG00000049759	NEDD4L	7906.02	-0.137231	0.000127852	0.0164024
ENSG00000164300	SERINC5	3050.93	-0.169516	0.000127522	0.0164024
ENSG00000121039	RDH10	612.799	0.295841	0.000129923	0.0165219
ENSG00000166741	NNMT	146.12	-0.562765	0.000146127	0.0184208
ENSG00000179094	PER1	784.347	-0.2965	0.0001528	0.019096
ENSG00000101384	JAG1	2202.2	-0.175005	0.000155101	0.0192179
ENSG00000070669	ASNS	5194.02	0.225118	0.000163459	0.0196339
ENSG00000143797	MBOAT2	5605.44	-0.310129	0.000166584	0.0196339
ENSG00000145703	IQGAP2	1493.99	-0.275098	0.000165099	0.0196339
ENSG00000147454	SLC25A37	3122.87	-0.156232	0.000165739	0.0196339
ENSG00000243081	AC092894.1	99.6	0.72143	0.000163185	0.0196339
ENSG00000245750	DRAIC	318.459	0.338165	0.00016075	0.0196339
ENSG00000108932	SLC16A6	174.619	-0.454495	0.00018046	0.0209673
ENSG00000163251	FZD5	1581.11	-0.213822	0.00018079	0.0209673
ENSG00000173482	PTPRM	937.361	-0.228653	0.000187778	0.0216049
ENSG00000035681	NSMAF	1309.53	-0.19996	0.000194081	0.0221542
ENSG00000165029	ABCA1	106.722	0.715024	0.000196486	0.0222536
ENSG00000043355	ZIC2	917.613	0.235944	0.000210697	0.0236781
ENSG00000008513	ST3GAL1	29874.2	0.122993	0.000216091	0.0240975
ENSG00000092964	DPYSL2	1815.86	0.195771	0.000238141	0.0263537
ENSG00000114450	GNB4	722.168	-0.332753	0.000240584	0.0264223
ENSG00000165821	SALL2	783.127	0.255879	0.000273835	0.029848
ENSG00000129474	AJUBA	1076.55	0.2922	0.000275996	0.0298591
ENSG00000110931	CAMKK2	2484.5	-0.166886	0.000281988	0.0302813
ENSG00000004866	ST7	5385.01	0.164567	0.000307198	0.0325347
ENSG00000151690	MFSD6	1221.56	0.21116	0.00030798	0.0325347
ENSG00000184304	PRKD1	9066.84	0.159566	0.000309705	0.0325347
ENSG00000110660	SLC35F2	1758.48	-0.162278	0.000319426	0.0333145
ENSG00000117461	PIK3R3	5258.54	0.133208	0.000341746	0.0353878
ENSG00000154035	NA	162.767	0.529843	0.000358824	0.0368927
ENSG00000146648	EGFR	3957.89	-0.150815	0.000366731	0.0371783
ENSG00000149150	SLC43A1	1752.23	-0.220191	0.000366498	0.0371783
ENSG00000111816	FRK	517.786	-0.321555	0.000384877	0.0387469
ENSG00000164120	HPGD	121.758	-0.537344	0.000393993	0.0393912
ENSG00000187398	LUZP2	2254.06	0.218137	0.000400975	0.0398146
ENSG00000184349	EFNA5	10686.3	-0.152726	0.000416999	0.0411241
ENSG00000136478	TEX2	2323.19	-0.145968	0.000428989	0.0420207
ENSG00000083857	FAT1	5825.73	-0.183005	0.00043308	0.0421366
ENSG00000095739	BAMBI	608.753	0.293438	0.000468909	0.0453185
ENSG00000247796	AC008966.1	270.098	0.333766	0.000490367	0.0470785
ENSG00000102172	SMS	4343.74	-0.150351	0.000497404	0.0474399
ENSG00000113594	LIFR	1317.51	-0.370001	0.000520905	0.0493566
ENSG00000205659	LIN52	539.67	-0.26539	0.000532736	0.0501498
ENSG00000149218	ENDOD1	13756.9	-0.151074	0.000542895	0.0507765
ENSG00000106049	HIBADH	1836	0.17217	0.000560229	0.0520618
ENSG00000167552	TUBA1A	1389.09	0.279838	0.000572411	0.0528551
ENSG00000109906	ZBTB16	1952.43	-0.37414	0.000590873	0.0542145
ENSG00000117280	RAB29	1277.91	-0.168604	0.000687964	0.0627259
ENSG00000112379	ARFGEF3	12052.2	-0.166756	0.000718128	0.0650669
ENSG00000117143	UAP1	8424.42	-0.201492	0.000754068	0.0678989
ENSG00000082014	SMARCD3	637.271	0.299337	0.000809305	0.0724228
ENSG00000068971	PPP2R5B	466.503	0.319093	0.000821686	0.0730796
ENSG00000198793	MTOR	5461.83	-0.156639	0.000851826	0.0752983
ENSG00000115594	IL1R1	996.238	-0.198497	0.000869346	0.0763813
ENSG00000120875	DUSP4	533.042	-0.247979	0.000895674	0.0782204
ENSG00000165424	ZCCHC24	949.972	0.199812	0.000943819	0.0819314
ENSG00000124145	SDC4	1759.02	0.2131	0.00101244	0.0873651
ENSG00000163273	NPPC	42.702	-0.694959	0.00106286	0.0911733
ENSG00000012660	ELOVL5	5594.48	-0.213746	0.0011031	0.0940683
ENSG00000078018	MAP2	1078.17	-0.215343	0.00114835	0.097355
ENSG00000163536	SERPINI1	247.186	0.400109	0.00116828	0.0981855
ENSG00000169299	PGM2	2471.34	-0.151992	0.0011717	0.0981855
ENSG00000095209	TMEM38B	1116.55	0.245421	0.00120482	0.0998072
ENSG00000128829	EIF2AK4	5122.57	-0.119203	0.00120022	0.0998072
ENSG00000189221	MAOA	17356.5	-0.133529	0.0012183	0.100351
ENSG00000086205	FOLH1	26361	0.141279	0.00123921	0.101496
ENSG00000083223	TUT7	1912.66	-0.232365	0.00128426	0.104595
ENSG00000225255	LINC01297	198.962	-0.385769	0.00135504	0.109743
ENSG00000167749	KLK4	1522.3	-0.244842	0.00138157	0.110655
ENSG00000245146	MALINC1	715.696	0.314568	0.00137886	0.110655
ENSG00000136167	LCP1	2614.48	-0.181705	0.00142828	0.113518
ENSG00000140416	TPM1	2557.91	-0.124424	0.00143297	0.113518
ENSG00000206190	ATP10A	557.427	-0.22504	0.0014409	0.113526
ENSG00000147526	TACC1	4836.99	-0.138311	0.00152702	0.119661
ENSG00000113161	HMGCR	3845.12	-0.183985	0.0015803	0.123063
ENSG00000143416	SELENBP1	13453.5	0.217572	0.00158741	0.123063
ENSG00000100647	SUSD6	1653.06	0.184999	0.00163467	0.124165
ENSG00000111490	TBC1D30	2219.93	-0.148599	0.00164034	0.124165
ENSG00000168209	DDIT4	3958.04	0.201242	0.00163362	0.124165
ENSG00000182957	SPATA13	1181.66	-0.231198	0.00161847	0.124165
ENSG00000248019	FAM13A-AS1	471.758	-0.411231	0.00164446	0.124165
ENSG00000130338	TULP4	2319.58	0.15459	0.00172031	0.128553
ENSG00000197822	OCLN	814.451	0.203806	0.0017143	0.128553
ENSG00000080608	PUM3	1069.33	-0.199493	0.00175589	0.130539
ENSG00000100292	HMOX1	279.049	0.441234	0.00177868	0.130891
ENSG00000154978	VOPP1	958.667	0.204357	0.00177589	0.130891
ENSG00000145819	ARHGAP26	861.083	-0.198319	0.00182869	0.133892
ENSG00000107779	BMPR1A	1072.04	-0.186169	0.00189192	0.137825
ENSG00000150361	KLHL1	1138.31	0.32879	0.00191504	0.138811
ENSG00000129682	FGF13	104.022	0.566799	0.00205652	0.148325
ENSG00000125885	MCM8	1919.33	-0.17871	0.00210199	0.150458
ENSG00000185630	PBX1	554.075	0.283748	0.00210685	0.150458
ENSG00000156689	GLYATL2	212.988	-0.336851	0.0021245	0.150975
ENSG00000185634	SHC4	56.7347	0.70304	0.00224283	0.158606
ENSG00000150347	ARID5B	2205.24	-0.180853	0.00227734	0.160265
ENSG00000073910	FRY	1194.23	-0.210092	0.00230492	0.161422
ENSG00000139668	WDFY2	411.685	-0.257541	0.00234647	0.163542
ENSG00000075886	TUBA3D	58.8209	-0.598056	0.00239278	0.165181
ENSG00000138029	HADHB	2685.82	0.133579	0.00239114	0.165181
ENSG00000175197	DDIT3	610.778	0.298011	0.00255647	0.175645
ENSG00000104341	LAPTM4B	1597.92	0.168887	0.00260661	0.177409
ENSG00000145868	FBXO38	1966.29	-0.170507	0.00260363	0.177409
ENSG00000111269	CREBL2	1810.94	0.189903	0.00264986	0.17951
ENSG00000119685	TTLL5	1547.03	-0.133384	0.00268841	0.181274
ENSG00000147324	MFHAS1	1846.34	-0.135333	0.00277262	0.186086
ENSG00000104356	POP1	1443.44	-0.147114	0.00294004	0.19348
ENSG00000106789	CORO2A	2186.61	-0.151072	0.00294722	0.19348
ENSG00000172469	MANEA	1735.77	0.33746	0.00294952	0.19348
ENSG00000253203	GUSBP3	402.473	0.274048	0.00293889	0.19348
ENSG00000254982	NA	60.398	-0.611619	0.00292125	0.19348
ENSG00000135373	EHF	12157.3	-0.147118	0.00306973	0.200459
ENSG00000051620	HEBP2	3171.86	-0.190076	0.00315984	0.205048
ENSG00000116299	KIAA1324	285.779	0.307096	0.00316829	0.205048
ENSG00000163293	NIPAL1	288.409	0.317351	0.00320711	0.206638
ENSG00000211689	TRGC1	134.421	-0.508414	0.0032535	0.208699
ENSG00000242407	AC091179.1	196.076	0.342122	0.00331464	0.211684
ENSG00000136247	ZDHHC4	1770.01	0.150268	0.00341129	0.215015
ENSG00000196756	SNHG17	1477.53	-0.148993	0.00339341	0.215015
ENSG00000198785	GRIN3A	268.237	-0.293974	0.00340064	0.215015
ENSG00000183779	ZNF703	1786.46	0.186214	0.00350151	0.219746
ENSG00000083307	GRHL2	6272.88	-0.110248	0.00352013	0.219963
ENSG00000136689	IL1RN	167.612	0.441344	0.00363734	0.225782
ENSG00000137872	SEMA6D	38.592	-0.736823	0.00364441	0.225782
ENSG00000088756	ARHGAP28	563.217	-0.267567	0.0037565	0.231736
ENSG00000112365	ZBTB24	914.476	-0.161678	0.00380938	0.233306
ENSG00000150403	TMCO3	2177.47	0.127735	0.00381414	0.233306
ENSG00000128833	MYO5C	4397.3	-0.128765	0.00387424	0.234999
ENSG00000157693	TMEM268	1603.73	-0.13869	0.00386236	0.234999
ENSG00000119950	MXI1	1092.79	0.203477	0.00391373	0.236406
ENSG00000116062	MSH6	2728.51	-0.110367	0.00407424	0.243481
ENSG00000116977	LGALS8	1465.49	0.229524	0.00409414	0.243481
ENSG00000171316	CHD7	1690.93	-0.156699	0.00409804	0.243481
ENSG00000198796	ALPK2	25.8353	-0.785308	0.00408532	0.243481
ENSG00000149541	B3GAT3	1125.09	0.229489	0.00425785	0.251943
ENSG00000143164	DCAF6	4863.56	-0.125931	0.00429222	0.252945
ENSG00000090402	SI	2075.94	0.262589	0.00434044	0.25475
ENSG00000179104	TMTC2	1427.06	-0.159566	0.00436131	0.254943
ENSG00000135069	PSAT1	7931.12	0.161639	0.00443826	0.255862
ENSG00000141736	ERBB2	5362.42	0.188564	0.00442823	0.255862
ENSG00000163631	ALB	178.349	0.403957	0.00444762	0.255862
ENSG00000164291	ARSK	151.458	0.346112	0.0044435	0.255862
ENSG00000172785	CBWD1	1400.88	-0.184214	0.00447111	0.256196
ENSG00000250091	DNAH10OS	63.8784	0.775263	0.00451051	0.257437
ENSG00000107745	MICU1	2110.46	0.145686	0.00454263	0.258253
ENSG00000102226	USP11	1208.92	0.201865	0.00465047	0.261309
ENSG00000132466	ANKRD17	9057.54	-0.125762	0.00463885	0.261309
ENSG00000136205	TNS3	80.4538	-0.516586	0.0046221	0.261309
ENSG00000119669	IRF2BPL	5394.89	0.141314	0.0046717	0.261489
ENSG00000155016	CYP2U1	645.22	-0.223844	0.00475454	0.264467
ENSG00000188372	ZP3	553.606	0.244181	0.00478118	0.264467
ENSG00000215022	AL008729.1	22.8573	-1.00069	0.00478474	0.264467
ENSG00000273045	C2orf15	66.6772	0.563344	0.00479788	0.264467
ENSG00000124664	SPDEF	2532.1	-0.197153	0.00482387	0.264893
ENSG00000168303	MPLKIP	838.059	0.228776	0.00498454	0.272682
ENSG00000144283	PKP4	2748.66	0.123943	0.00508488	0.274035
ENSG00000145088	EAF2	178.921	-0.429092	0.00508031	0.274035
ENSG00000172175	MALT1	1583.53	-0.243051	0.00507704	0.274035
ENSG00000267041	ZNF850	1190.82	-0.255898	0.0050812	0.274035
ENSG00000096088	PGC	39.9455	-0.680292	0.00516263	0.275157
ENSG00000250148	KRT8P31	47.1156	-0.780805	0.00513661	0.275157
ENSG00000273015	AC008124.1	720.404	0.198791	0.0051579	0.275157
ENSG00000026025	VIM	281.399	0.280969	0.00535604	0.283382
ENSG00000102879	CORO1A	90.2671	0.502084	0.00535337	0.283382
ENSG00000188167	TMPPE	977.385	-0.195858	0.0055501	0.292581
ENSG00000149177	PTPRJ	1121.13	-0.184995	0.00557252	0.292699
ENSG00000070778	PTPN21	774.608	-0.193726	0.00565378	0.29483
ENSG00000163075	CFAP221	38.981	-0.733734	0.00563667	0.29483
ENSG00000104687	GSR	9092	-0.10397	0.00570548	0.295401
ENSG00000127472	PLA2G5	30.1485	-0.756987	0.00570026	0.295401
ENSG00000166454	ATMIN	2864.12	-0.149075	0.00580092	0.299274
ENSG00000160179	ABCG1	466.497	0.265476	0.00584758	0.300611
ENSG00000064393	HIPK2	12912	-0.169558	0.00600501	0.307613
ENSG00000077092	RARB	240.266	-0.326223	0.00607402	0.310053
ENSG00000139132	FGD4	690.336	-0.229222	0.0061052	0.310551
ENSG00000113716	HMGXB3	3860.3	-0.152127	0.00613179	0.310813
ENSG00000126603	GLIS2	441.625	0.300085	0.00616406	0.31136
ENSG00000160862	AZGP1	857.606	-0.258097	0.00642218	0.322288
ENSG00000184863	RBM33	2134.09	-0.12977	0.00642486	0.322288
ENSG00000111684	LPCAT3	1770.09	0.142323	0.00652717	0.326153
ENSG00000198680	TUSC1	98.017	0.438008	0.0065469	0.326153
ENSG00000237149	ZNF503-AS2	119.264	0.424806	0.00657634	0.326497
ENSG00000100906	NFKBIA	2469.18	-0.149972	0.00672557	0.328908
ENSG00000145685	LHFPL2	220.998	0.308991	0.00665317	0.328908
ENSG00000172296	SPTLC3	592.442	0.252917	0.00675448	0.328908
ENSG00000187210	GCNT1	1858.72	-0.201766	0.00672722	0.328908
ENSG00000247627	MTND4P12	75.3207	-0.672766	0.0066761	0.328908
ENSG00000270689	BUD13P1	196.849	-0.453796	0.00676102	0.328908
ENSG00000197024	ZNF398	1442.83	-0.141723	0.00685311	0.332273
ENSG00000078369	GNB1	13133.1	0.0743134	0.00702141	0.339298
ENSG00000014257	ACPP	645.56	0.209933	0.00705222	0.339603
ENSG00000198018	ENTPD7	551.592	-0.196424	0.00707457	0.339603
ENSG00000102554	KLF5	168.951	-0.340247	0.00711778	0.34055
ENSG00000188848	BEND4	1225.84	-0.245468	0.00717182	0.341726
ENSG00000231422	LINC01516	186.447	-0.406346	0.00721309	0.341726
ENSG00000257954	AC125611.2	61.7966	-0.635664	0.00719723	0.341726
ENSG00000128641	MYO1B	3208.06	-0.158238	0.00725457	0.342572
ENSG00000114738	MAPKAPK3	2143.28	0.154626	0.00732373	0.344715
ENSG00000138376	BARD1	5633.65	0.161244	0.00737611	0.346057
ENSG00000140391	TSPAN3	2571.34	0.159493	0.00741919	0.346955
ENSG00000168827	GFM1	4655.06	-0.128511	0.00746262	0.347864
ENSG00000109458	GAB1	281.836	0.281331	0.00750292	0.348621
ENSG00000267504	AC090236.2	99.2024	-0.455323	0.00752833	0.348684
ENSG00000170899	GSTA4	281.578	0.30631	0.00755634	0.348867
ENSG00000121851	POLR3GL	178.638	0.348122	0.00762778	0.349936
ENSG00000197312	DDI2	2856.98	-0.142818	0.00760602	0.349936
ENSG00000156973	PDE6D	231.775	0.286553	0.00765398	0.350031
ENSG00000075539	FRYL	3102.78	-0.236703	0.00778964	0.352834
ENSG00000104643	MTMR9	1401.77	-0.202984	0.00780531	0.352834
ENSG00000108669	CYTH1	1313.44	-0.140034	0.00776688	0.352834
ENSG00000244128	LINC01322	68.5136	0.502533	0.00781263	0.352834
ENSG00000076554	TPD52	3096.71	-0.178627	0.00792987	0.35475
ENSG00000144452	ABCA12	225.588	0.350354	0.00794489	0.35475
ENSG00000154917	RAB6B	692.067	0.207992	0.00793263	0.35475
ENSG00000172331	BPGM	589.958	0.177487	0.00795294	0.35475
ENSG00000138764	CCNG2	1623.95	0.284965	0.00801983	0.356636
ENSG00000065518	NDUFB4	13589.9	0.195964	0.00805895	0.35728
ENSG00000231890	DARS-AS1	111.622	-0.472429	0.00822974	0.36374
ENSG00000107537	PHYH	984.416	0.197966	0.00828469	0.365055
ENSG00000168070	MAJIN	53.2371	0.727558	0.00832891	0.365891
ENSG00000261360	AC010491.1	67.6547	-0.590552	0.00840647	0.368183
ENSG00000213047	DENND1B	2139	0.254821	0.00846569	0.36966
ENSG00000260409	AC012414.5	33.5999	-0.764824	0.00851016	0.370486
ENSG00000140332	TLE3	7771.66	0.13977	0.00854142	0.370734
ENSG00000059378	PARP12	630.003	0.194593	0.00871304	0.373707
ENSG00000100889	PCK2	3854.94	0.174328	0.00864361	0.373707
ENSG00000141458	NPC1	2866.8	-0.121676	0.00867058	0.373707
ENSG00000175161	CADM2	78.6966	-0.444613	0.00870821	0.373707
ENSG00000116675	DNAJC6	101.205	0.506575	0.00885618	0.378726
ENSG00000095951	HIVEP1	2176.78	-0.131564	0.00892108	0.380284
ENSG00000128965	CHAC1	432.786	0.331474	0.00894508	0.380284
ENSG00000256683	ZNF350	478.987	-0.214324	0.00904924	0.383587
ENSG00000048707	VPS13D	5271.03	-0.143915	0.00920094	0.388014
ENSG00000146433	TMEM181	1112.47	0.155456	0.00920719	0.388014
ENSG00000150687	PRSS23	65.6034	0.630342	0.0093948	0.393631
ENSG00000164181	ELOVL7	5246.75	-0.303084	0.00937887	0.393631
ENSG00000112186	CAP2	573.196	-0.190297	0.00946614	0.394341
ENSG00000186458	DEFB132	117.367	-0.373556	0.00945044	0.394341
ENSG00000005884	ITGA3	382.614	0.252948	0.00950466	0.394811
ENSG00000203943	SAMD13	401.641	0.247926	0.00954383	0.395306
ENSG00000167771	RCOR2	58.4075	0.569109	0.00969753	0.400527
ENSG00000150672	DLG2	161.526	-0.340317	0.0100378	0.412739
ENSG00000152380	FAM151B	95.5867	-0.387232	0.0100975	0.412739
ENSG00000156453	PCDH1	835.075	-0.187507	0.0101047	0.412739
ENSG00000219200	RNASEK	38.0078	-0.676782	0.0101071	0.412739
ENSG00000153982	GDPD1	250.141	0.311497	0.0102042	0.415535
ENSG00000111266	DUSP16	2507.55	0.1056	0.0102724	0.417139
ENSG00000231335	NA	25.3899	-1.00512	0.0103697	0.419915
ENSG00000131368	MRPS25	2932.99	-0.116697	0.0106939	0.431567
ENSG00000188242	PP7080	1331.32	0.181353	0.010717	0.431567
ENSG00000021300	PLEKHB1	4464.94	0.160048	0.0109001	0.434941
ENSG00000166750	SLFN5	1460.49	0.173774	0.0108933	0.434941
ENSG00000174132	FAM174A	456.104	0.232693	0.0109208	0.434941
ENSG00000178718	RPP25	119.247	0.43406	0.0108946	0.434941
ENSG00000168615	ADAM9	6036.58	-0.107075	0.010999	0.436858
ENSG00000115977	AAK1	1330.25	-0.167284	0.0110392	0.437256
ENSG00000106733	NMRK1	313.956	0.290356	0.0112218	0.442074
ENSG00000136235	GPNMB	136.973	0.414023	0.0111973	0.442074
ENSG00000178607	ERN1	1090.01	-0.160951	0.0113277	0.445035
ENSG00000115687	PASK	2857.44	-0.156494	0.0113848	0.446068
ENSG00000154153	RETREG1	865.547	0.227745	0.0114954	0.44798
ENSG00000178935	ZNF552	938.228	-0.169487	0.0114798	0.44798
ENSG00000009844	VTA1	3666.49	0.225876	0.0115426	0.448616
ENSG00000068615	REEP1	78.8039	0.458668	0.0116826	0.451751
ENSG00000197380	DACT3	50.0287	0.580577	0.0116856	0.451751
ENSG00000135452	TSPAN31	503.71	0.210656	0.0117441	0.452379
ENSG00000198939	ZFP2	36.8351	0.713313	0.0117643	0.452379
ENSG00000079459	FDFT1	5267.01	-0.126626	0.0120218	0.461058
ENSG00000197429	IPP	866.198	0.198964	0.0122045	0.46683
ENSG00000163072	NOSTRIN	190.091	-0.293393	0.0123327	0.470493
ENSG00000213694	S1PR3	239.215	-0.262533	0.0124606	0.474124
ENSG00000139182	CLSTN3	1247.55	0.181236	0.0126007	0.476949
ENSG00000175115	PACS1	1870.47	-0.180695	0.0125778	0.476949
ENSG00000096092	TMEM14A	498.552	0.205752	0.0126522	0.477653
ENSG00000104081	BMF	879.541	0.156428	0.0129035	0.47975
ENSG00000130164	LDLR	2595.26	-0.16743	0.0127638	0.47975
ENSG00000139211	AMIGO2	74.5972	0.613678	0.0129063	0.47975
ENSG00000156011	PSD3	3571.89	-0.143167	0.0129014	0.47975
ENSG00000169180	XPO6	7263.38	-0.0818165	0.0127941	0.47975
ENSG00000226121	AHCTF1P1	52.6215	-0.609314	0.0128378	0.47975
ENSG00000196352	CD55	42.0526	0.708298	0.0129776	0.479938
ENSG00000227063	RPL41P1	488.831	0.354035	0.0129611	0.479938
ENSG00000109576	AADAT	2415.75	-0.153107	0.0130761	0.481754
ENSG00000257167	TMPO-AS1	446	0.227748	0.0130931	0.481754
ENSG00000156802	ATAD2	7119.03	-0.162294	0.0131982	0.484391
ENSG00000134324	LPIN1	1909.41	-0.138745	0.0132336	0.484462
ENSG00000188257	PLA2G2A	64.0516	0.543829	0.0132693	0.484547
ENSG00000229348	HYI-AS1	29.2324	-0.83235	0.0135334	0.492949
ENSG00000111275	ALDH2	358.631	0.232635	0.0136078	0.493567
ENSG00000143878	RHOB	2577.45	0.130578	0.013649	0.493567
ENSG00000267350	NA	602.505	-0.165191	0.0136525	0.493567
ENSG00000144746	ARL6IP5	3397.41	0.146943	0.0137313	0.495179
ENSG00000154124	OTULIN	1693.75	-0.173045	0.0139913	0.503306
ENSG00000105939	ZC3HAV1	5137.34	-0.118263	0.0140976	0.505355
ENSG00000171004	HS6ST2	181.002	0.330699	0.0141361	0.505355
ENSG00000262136	AC092115.3	23.6705	-1.02503	0.0141529	0.505355
ENSG00000123975	CKS2	2807.29	0.181392	0.0142842	0.507544
ENSG00000249641	HOXC13-AS	231.699	0.349338	0.0142818	0.507544
ENSG00000091986	CCDC80	56.9514	0.576202	0.0143925	0.510141
ENSG00000166391	MOGAT2	37.3085	-0.591637	0.0145114	0.511852
ENSG00000256073	URB1-AS1	375.197	0.299067	0.0144857	0.511852
ENSG00000177485	ZBTB33	64.2112	-0.482754	0.0147285	0.518249
ENSG00000122085	MTERF4	2799.5	-0.0990438	0.0147663	0.518321
ENSG00000038002	AGA	449.238	0.219162	0.0151041	0.522948
ENSG00000102780	DGKH	7387.7	0.208235	0.0152117	0.522948
ENSG00000117407	ARTN	98.6524	-0.391586	0.0152228	0.522948
ENSG00000167543	TP53I13	523.628	0.293366	0.0151752	0.522948
ENSG00000169604	ANTXR1	481.176	0.210074	0.0150765	0.522948
ENSG00000184716	SERINC4	24.5926	-0.772555	0.0151767	0.522948
ENSG00000186063	AIDA	3136.66	0.268419	0.014989	0.522948
ENSG00000262160	AC020978.5	706.155	-0.174372	0.014951	0.522948
ENSG00000267680	ZNF224	252.336	-0.286322	0.0150593	0.522948
ENSG00000151883	PARP8	1327.21	0.178393	0.0153716	0.524335
ENSG00000171497	PPID	1514.63	-0.121094	0.0153629	0.524335
ENSG00000181744	C3orf58	285.676	-0.298519	0.0153112	0.524335
ENSG00000124766	SOX4	6911.03	0.113445	0.0155479	0.529102
ENSG00000100614	PPM1A	3356.31	-0.150629	0.0156244	0.530461
ENSG00000149809	TM7SF2	4126.13	0.192646	0.0157353	0.53298
ENSG00000197016	ZNF470	1096.27	-0.167567	0.0157993	0.533898
ENSG00000240207	AC080013.1	82.8744	-0.505033	0.0158447	0.534186
ENSG00000237291	NA	37.4593	-0.687968	0.0159194	0.53546
ENSG00000155792	DEPTOR	294.123	0.239803	0.0160081	0.537199
ENSG00000113369	ARRDC3	2943.91	0.209325	0.0160488	0.537319
ENSG00000103404	USP31	2203.31	-0.124607	0.0162157	0.541657
ENSG00000263958	AC091138.1	223.027	0.328851	0.0165087	0.550175
ENSG00000196091	MYBPC1	39.4229	-0.598198	0.0165506	0.550308
ENSG00000203709	MIR29B2CHG	1791.33	-0.243892	0.0166563	0.552556
ENSG00000072134	EPN2	2235.48	-0.108174	0.0167201	0.553064
ENSG00000085719	CPNE3	17055.5	0.184158	0.016748	0.553064
ENSG00000198551	ZNF627	1116.54	0.144116	0.0168592	0.555474
ENSG00000062598	ELMO2	1299.74	-0.135874	0.0169303	0.555803
ENSG00000123836	PFKFB2	1498.14	-0.12098	0.0169505	0.555803
ENSG00000231721	LINC-PINT	147.738	-0.449589	0.0169843	0.555803
ENSG00000166938	DIS3L	1720.67	0.112555	0.0170462	0.556575
ENSG00000148672	GLUD1	4428.52	-0.114564	0.0171453	0.5577
ENSG00000231918	AC007402.1	32.6381	0.727853	0.0171576	0.5577
ENSG00000171033	PKIA	65.7098	0.47694	0.0173491	0.562663
ENSG00000158796	DEDD	1058.14	-0.1336	0.017415	0.563537
ENSG00000118515	SGK1	63.9985	-0.444597	0.0175916	0.564752
ENSG00000143801	PSEN2	950.962	-0.172996	0.0175596	0.564752
ENSG00000144118	RALB	1124.86	0.164015	0.0176473	0.564752
ENSG00000196466	ZNF799	264.821	0.235079	0.0176408	0.564752
ENSG00000248049	UBA6-AS1	512.172	0.186661	0.017504	0.564752
ENSG00000100422	CERK	43.8707	0.693438	0.0178626	0.568972
ENSG00000111276	CDKN1B	1832.11	0.141353	0.017873	0.568972
ENSG00000147459	DOCK5	2135.36	-0.148981	0.0178969	0.568972
ENSG00000147010	SH3KBP1	562.657	0.198798	0.0179569	0.569631
ENSG00000135912	TTLL4	1033.17	-0.156996	0.0180527	0.57142
ENSG00000005189	REXO5	863.861	-0.134961	0.0183132	0.576071
ENSG00000107201	DDX58	261.383	0.292487	0.0183189	0.576071
ENSG00000198729	PPP1R14C	411.027	0.200165	0.0182421	0.576071
ENSG00000131016	AKAP12	48.2671	-0.817658	0.0184832	0.576877
ENSG00000134030	CTIF	404.104	0.238464	0.0184954	0.576877
ENSG00000185670	ZBTB3	452.226	0.198533	0.0185246	0.576877
ENSG00000204387	C6orf48	1215.41	0.192181	0.0185833	0.576877
ENSG00000223705	NSUN5P1	149.971	-0.310025	0.0184764	0.576877
ENSG00000272325	NUDT3	3335.15	0.0965541	0.0185482	0.576877
ENSG00000116209	TMEM59	3467.31	0.153597	0.018668	0.578269
ENSG00000145687	SSBP2	420.648	0.206957	0.0187845	0.579401
ENSG00000236682	AC068282.1	64.1302	0.499524	0.0187518	0.579401
ENSG00000149269	PAK1	341.699	0.232499	0.018861	0.580264
ENSG00000167720	SRR	638.819	0.172501	0.0189325	0.580264
ENSG00000183580	FBXL7	70.3119	0.457048	0.0189225	0.580264
ENSG00000121871	SLITRK3	457.717	0.212667	0.0190123	0.581478
ENSG00000091656	ZFHX4	758.621	-0.212982	0.0191208	0.583568
ENSG00000197965	MPZL1	5123.83	-0.0838223	0.0192609	0.586607
ENSG00000164663	USP49	395.717	-0.219701	0.0194095	0.589894
ENSG00000103319	EEF2K	1775.69	-0.110753	0.0195642	0.592112
ENSG00000142207	URB1	3207.59	-0.103924	0.0195505	0.592112
ENSG00000109466	KLHL2	429.142	-0.185909	0.019649	0.593441
ENSG00000141664	ZCCHC2	1929.51	-0.119053	0.0199265	0.598083
ENSG00000185924	RTN4RL1	290.472	0.318925	0.019899	0.598083
ENSG00000235314	LINC00957	181.822	0.28388	0.0198645	0.598083
ENSG00000104325	DECR1	585.156	0.178596	0.0200277	0.598817
ENSG00000133318	RTN3	8068.46	0.0996693	0.0200335	0.598817
ENSG00000213185	FAM24B	24.0685	-0.732758	0.0202043	0.60268
ENSG00000111845	PAK1IP1	1073.99	-0.158078	0.0202611	0.603133
ENSG00000104427	ZC2HC1A	379.466	0.233581	0.0203319	0.603548
ENSG00000110031	LPXN	220.674	-0.256453	0.0203584	0.603548
ENSG00000144366	GULP1	3103.56	0.158944	0.0204107	0.603866
ENSG00000178187	ZNF454	288.256	0.253309	0.0204562	0.603979
ENSG00000087076	HSD17B14	26.2564	0.839322	0.0205446	0.605356
ENSG00000117523	PRRC2C	12725.3	-0.129924	0.0207161	0.606709
ENSG00000134240	HMGCS2	603.217	0.205057	0.0207131	0.606709
ENSG00000155970	MICU3	181.687	0.388243	0.0206329	0.606709
ENSG00000100888	CHD8	6253.36	-0.0892339	0.0209043	0.610988
ENSG00000138050	THUMPD2	188.186	-0.254774	0.0210764	0.613118
ENSG00000147601	TERF1	873.393	0.208941	0.0210436	0.613118
ENSG00000227051	C14orf132	745.412	0.166485	0.0211041	0.613118
ENSG00000119771	KLHL29	561.909	-0.191634	0.0212929	0.613683
ENSG00000166323	C11orf65	63.2041	-0.539695	0.0212609	0.613683
ENSG00000187017	ESPN	84.8717	0.543446	0.0212262	0.613683
ENSG00000196704	AMZ2	1280.3	0.137716	0.0212029	0.613683
ENSG00000162415	ZSWIM5	106.634	0.376262	0.021383	0.615057
ENSG00000066185	ZMYND12	125.855	0.357405	0.0214416	0.615522
ENSG00000144535	DIS3L2	788.151	-0.188565	0.0214973	0.615572
ENSG00000157514	TSC22D3	899.099	0.198695	0.0215282	0.615572
ENSG00000041880	PARP3	392.225	0.235401	0.0216167	0.616883
ENSG00000107864	CPEB3	318.486	-0.236053	0.021738	0.619127
ENSG00000124831	LRRFIP1	3327.91	-0.180024	0.0219484	0.620756
ENSG00000158234	FAIM	849.477	0.16304	0.0219546	0.620756
ENSG00000159403	C1R	107.935	0.361738	0.0219904	0.620756
ENSG00000161653	NAGS	22.7255	0.920951	0.0219663	0.620756
ENSG00000188483	IER5L	193.436	0.384239	0.0220093	0.620756
ENSG00000188153	COL4A5	3086.2	-0.160318	0.0221935	0.623526
ENSG00000261560	AC007216.3	61.5348	-0.488197	0.0221911	0.623526
ENSG00000120519	SLC10A7	951.012	-0.180909	0.0223438	0.626535
ENSG00000069011	PITX1	2736.63	0.154999	0.0224677	0.628792
ENSG00000247271	ZBED5-AS1	468.72	0.174613	0.0225991	0.63125
ENSG00000198740	ZNF652	4169.93	-0.135968	0.0226735	0.632111
ENSG00000065526	SPEN	4593.41	-0.158587	0.0227207	0.632212
ENSG00000114200	BCHE	1846.02	0.190402	0.0228113	0.633517
ENSG00000136378	ADAMTS7	117.571	0.370682	0.0231967	0.642987
ENSG00000086102	NFX1	3414.69	-0.0790718	0.0232934	0.644436
ENSG00000272565	NA	811.525	-0.158685	0.0234534	0.647625
ENSG00000151612	ZNF827	1883.6	-0.136241	0.0235346	0.648634
ENSG00000141510	TP53	5354.53	0.117496	0.0236535	0.64944
ENSG00000266017	MIR4477B	41.9089	-0.536646	0.0236122	0.64944
ENSG00000108306	FBXL20	411.244	0.190628	0.0238656	0.651563
ENSG00000141639	MAPK4	121.812	0.357719	0.0238197	0.651563
ENSG00000152377	SPOCK1	38.3677	-0.559133	0.0238278	0.651563
ENSG00000065534	MYLK	445.356	0.267222	0.0241089	0.652488
ENSG00000103196	CRISPLD2	94.4179	-0.396632	0.0240579	0.652488
ENSG00000114805	PLCH1	442.199	0.19101	0.0241998	0.652488
ENSG00000156398	SFXN2	1926.66	-0.104268	0.0242367	0.652488
ENSG00000162458	FBLIM1	93.6196	0.381419	0.0242583	0.652488
ENSG00000164251	F2RL1	1075.85	-0.141511	0.0241415	0.652488
ENSG00000238005	AL391832.2	60.7587	0.469877	0.0242596	0.652488
ENSG00000272106	AL691432.2	449.029	0.219186	0.0242138	0.652488
ENSG00000052795	FNIP2	1299.04	-0.109958	0.02445	0.653969
ENSG00000107020	PLGRKT	844.562	0.197616	0.0244272	0.653969
ENSG00000130958	SLC35D2	354.339	0.221934	0.0243925	0.653969
ENSG00000170385	SLC30A1	1088.74	0.210196	0.0245035	0.654193
ENSG00000105856	HBP1	768.476	0.214822	0.0246528	0.656971
ENSG00000184408	KCND2	202.64	-0.274886	0.0247498	0.658346
ENSG00000171522	PTGER4	75.1184	-0.546916	0.0248214	0.659039
ENSG00000159128	IFNGR2	432.428	0.203991	0.0248728	0.659197
ENSG00000069702	TGFBR3	903.056	0.135277	0.0249239	0.659347
ENSG00000113070	HBEGF	316.06	0.223717	0.0250602	0.661745
ENSG00000112290	WASF1	287.24	0.228151	0.025189	0.663937
ENSG00000151090	THRB	2530.81	-0.126909	0.0252382	0.664026
ENSG00000087470	DNM1L	2893.09	-0.176971	0.0252985	0.664405
ENSG00000166780	C16orf45	186.68	0.323984	0.0253744	0.665195
ENSG00000177426	TGIF1	847.03	0.13021	0.0254461	0.66587
ENSG00000165449	SLC16A9	363.209	0.256658	0.0255161	0.6665
ENSG00000011523	CEP68	506.11	0.187772	0.0256202	0.666575
ENSG00000155093	PTPRN2	144.95	-0.30733	0.0256273	0.666575
ENSG00000170917	NUDT6	282.724	0.241089	0.025657	0.666575
ENSG00000006740	ARHGAP44	862.044	0.146772	0.0258802	0.667635
ENSG00000145284	SCD5	373.382	0.21468	0.0258685	0.667635
ENSG00000204592	HLA-E	110.734	0.376437	0.025769	0.667635
ENSG00000255353	AP003057.1	591.717	-0.172552	0.025882	0.667635
ENSG00000074416	MGLL	710.185	-0.150515	0.0260252	0.668446
ENSG00000161011	SQSTM1	6143.69	0.155129	0.0259598	0.668446
ENSG00000163386	NA	90.5731	-0.46801	0.0260517	0.668446
ENSG00000060237	WNK1	12083.1	-0.090936	0.0263066	0.67142
ENSG00000128908	INO80	1913.92	-0.0995973	0.0262328	0.67142
ENSG00000141542	RAB40B	472.392	0.184085	0.0263013	0.67142
ENSG00000143889	HNRNPLL	1101.66	0.143233	0.026441	0.671769
ENSG00000172239	PAIP1	2183.77	0.147138	0.0264593	0.671769
ENSG00000182704	TSKU	1117.6	-0.139281	0.0264326	0.671769
ENSG00000163412	EIF4E3	327.243	0.231672	0.0265417	0.672685
ENSG00000171302	CANT1	5410.24	-0.103825	0.0266416	0.674037
ENSG00000140577	CRTC3	975.104	0.137176	0.0269584	0.680222
ENSG00000168528	SERINC2	1062.86	0.13756	0.0269799	0.680222
ENSG00000169026	SLC49A3	72.8295	-0.379606	0.0270683	0.681266
ENSG00000058600	POLR3E	2005.5	-0.137666	0.0271563	0.682296
ENSG00000204520	MICA	109.691	0.348171	0.0272225	0.682775
ENSG00000127585	FBXL16	817.608	0.185993	0.027438	0.686992
ENSG00000166432	ZMAT1	33.8341	0.718353	0.0274975	0.687296
ENSG00000070081	NUCB2	1530.46	0.176659	0.0276715	0.689362
ENSG00000070214	SLC44A1	2764.88	0.177875	0.0278829	0.689362
ENSG00000101898	MCTS2P	108.392	-0.357436	0.0280081	0.689362
ENSG00000111696	NT5DC3	1184.31	-0.144016	0.0279494	0.689362
ENSG00000139517	LNX2	1367.65	0.115491	0.0278151	0.689362
ENSG00000166313	APBB1	432.136	0.213948	0.0279935	0.689362
ENSG00000172794	RAB37	36.1055	0.570618	0.027945	0.689362
ENSG00000196793	ZNF239	1007.1	-0.124865	0.0279182	0.689362
ENSG00000255193	AC100768.2	177.205	0.356671	0.0279839	0.689362
ENSG00000100625	SIX4	760.59	-0.161017	0.0281538	0.690601
ENSG00000182158	CREB3L2	2760.91	-0.0852107	0.0281176	0.690601
ENSG00000134287	ARF3	7468.54	0.0958433	0.0284282	0.696154
ENSG00000212864	RNF208	405.769	0.245351	0.02873	0.702358
ENSG00000146856	AGBL3	150.777	0.292954	0.0289841	0.707378
ENSG00000269378	AC022149.1	44.1283	-0.488405	0.0290974	0.708949
ENSG00000051341	POLQ	2224.76	-0.173428	0.0291739	0.709621
ENSG00000042088	TDP1	2651.54	0.0942991	0.0294296	0.711605
ENSG00000115339	GALNT3	1928.84	0.140238	0.0295009	0.711605
ENSG00000230061	TRPM2-AS	218.653	-0.257062	0.0294986	0.711605
ENSG00000237838	AC092422.1	83.7253	-0.472976	0.029474	0.711605
ENSG00000259556	AC090971.3	24.358	-0.729285	0.0293787	0.711605
ENSG00000078487	ZCWPW1	73.1066	0.423043	0.0298121	0.713733
ENSG00000136237	RAPGEF5	580.107	-0.173926	0.029967	0.713733
ENSG00000148123	PLPPR1	72.4864	0.461309	0.0299398	0.713733
ENSG00000160336	ZNF761	971.738	-0.178297	0.0299037	0.713733
ENSG00000175155	YPEL2	370.219	0.216768	0.0299709	0.713733
ENSG00000175274	TP53I11	1531.5	0.153029	0.0298846	0.713733
ENSG00000176623	RMDN1	1381.35	0.157677	0.029983	0.713733
ENSG00000259319	AF111167.2	64.5948	0.437181	0.0297223	0.713733
ENSG00000183117	CSMD1	2275.18	0.126689	0.0301973	0.717621
ENSG00000198125	MB	1088.99	0.171521	0.0302453	0.717621
ENSG00000105707	HPN	1952.33	0.159896	0.0303126	0.718043
ENSG00000139926	FRMD6	96.5374	0.368726	0.0304731	0.720666
ENSG00000113209	PCDHB5	49.6948	0.526931	0.0307332	0.722105
ENSG00000117713	ARID1A	5788.89	-0.127341	0.0306907	0.722105
ENSG00000119397	CNTRL	288.916	-0.211477	0.0306195	0.722105
ENSG00000148840	PPRC1	3433.29	-0.118857	0.0306978	0.722105
ENSG00000162613	FUBP1	5989.3	0.0846122	0.0309899	0.722522
ENSG00000172888	ZNF621	1326.59	-0.119124	0.0308847	0.722522
ENSG00000187534	PRR13P5	36.7353	-0.582678	0.0309408	0.722522
ENSG00000241316	SUCLG2-AS1	100.633	0.370022	0.0308799	0.722522
ENSG00000258162	AC069228.1	90.6333	0.48032	0.0310001	0.722522
ENSG00000249850	KRT18P31	51.2161	-0.628673	0.0311057	0.723819
ENSG00000185019	UBOX5	298.692	0.220401	0.0311718	0.724195
ENSG00000164615	CAMLG	624.785	0.156883	0.0312716	0.725351
ENSG00000176749	CDK5R1	520.542	-0.16481	0.0313717	0.726511
ENSG00000110917	MLEC	12635.8	-0.0762043	0.0315631	0.726992
ENSG00000128266	GNAZ	960.937	0.154573	0.0315931	0.726992
ENSG00000136367	ZFHX2	307.266	0.25742	0.031535	0.726992
ENSG00000167004	PDIA3	13784.5	-0.0651237	0.0315352	0.726992
ENSG00000136141	LRCH1	495.907	-0.207454	0.0316988	0.727005
ENSG00000162576	MXRA8	505.345	0.240414	0.0317151	0.727005
ENSG00000205542	TMSB4X	75.6731	0.467658	0.0317441	0.727005
ENSG00000069812	HES2	100.794	-0.365482	0.0319942	0.730562
ENSG00000231663	AL355472.1	78.5222	0.414715	0.0320002	0.730562
ENSG00000171488	LRRC8C	38.3305	-0.603221	0.032248	0.735062
ENSG00000131504	DIAPH1	9835.6	-0.0854946	0.0324558	0.736428
ENSG00000139433	GLTP	1858.23	0.117067	0.0324662	0.736428
ENSG00000156928	MALSU1	816.988	0.168842	0.0325112	0.736428
ENSG00000257261	AC008014.1	59.8097	-0.419725	0.0323688	0.736428
ENSG00000260329	AC007541.1	42.4669	0.538029	0.0326464	0.737188
ENSG00000272994	AC012360.3	208.545	-0.231985	0.0326015	0.737188
ENSG00000117016	RIMS3	146.357	0.305926	0.0327926	0.738597
ENSG00000161551	ZNF577	593.069	-0.185371	0.0328635	0.738597
ENSG00000168140	VASN	1100.72	0.186709	0.0329126	0.738597
ENSG00000196812	ZSCAN16	233.301	0.230558	0.032859	0.738597
ENSG00000180806	HOXC9	182.066	0.272532	0.0332074	0.744062
ENSG00000162631	NTNG1	128.233	-0.329571	0.0333433	0.745953
ENSG00000124215	CDH26	510.43	0.214912	0.0335413	0.748074
ENSG00000166147	FBN1	49.5252	-0.442167	0.0335275	0.748074
ENSG00000160191	PDE9A	1553.43	-0.10103	0.033637	0.749055
ENSG00000171604	CXXC5	804.042	0.156038	0.0337217	0.749792
ENSG00000116285	ERRFI1	1198	-0.123239	0.0339912	0.751173
ENSG00000148773	MKI67	11499.6	-0.141559	0.033893	0.751173
ENSG00000203647	AC106827.1	22.0025	-0.856163	0.0339817	0.751173
ENSG00000261884	AC040162.1	57.9709	-0.531297	0.0339556	0.751173
ENSG00000269343	ZNF587B	1855.85	-0.120347	0.0341789	0.754174
ENSG00000125780	TGM3	93.6274	0.404411	0.0343926	0.75544
ENSG00000184205	TSPYL2	261.831	0.243381	0.0343487	0.75544
ENSG00000268105	AC124856.1	34.4594	-0.612005	0.0343665	0.75544
ENSG00000164938	TP53INP1	7497.65	0.195167	0.0345267	0.757183
ENSG00000165478	HEPACAM	23.5696	0.723077	0.0346287	0.757183
ENSG00000171365	CLCN5	152.457	0.274988	0.0345977	0.757183
ENSG00000113163	COL4A3BP	1469.15	-0.143896	0.0349274	0.757632
ENSG00000117289	NA	1205.03	0.146935	0.0350673	0.757632
ENSG00000118816	CCNI	15391.2	0.136373	0.0347747	0.757632
ENSG00000120256	LRP11	1191.83	0.128299	0.0349404	0.757632
ENSG00000136826	KLF4	176.105	-0.286994	0.0348715	0.757632
ENSG00000158270	COLEC12	829.901	0.166725	0.0349731	0.757632
ENSG00000196757	ZNF700	488.299	-0.198508	0.0348454	0.757632
ENSG00000204103	MAFB	2971.02	0.0847581	0.0350471	0.757632
ENSG00000224043	CCNT2-AS1	30.9785	0.595626	0.03512	0.75764
ENSG00000143158	MPC2	8469.31	-0.129845	0.0352201	0.758671
ENSG00000068001	HYAL2	260.241	0.222537	0.0352791	0.758815
ENSG00000149212	SESN3	4549.3	0.252869	0.0353338	0.758865
ENSG00000182362	YBEY	311.917	0.195128	0.0353863	0.758869
ENSG00000125753	VASP	1188.56	0.152173	0.0354606	0.759338
ENSG00000051825	MPHOSPH9	3289.46	-0.168018	0.0356234	0.761699
ENSG00000035403	VCL	5688.35	-0.0798448	0.0359387	0.765107
ENSG00000135776	ABCB10	694.871	-0.124423	0.0359939	0.765107
ENSG00000150676	CCDC83	45.2708	0.52172	0.0358458	0.765107
ENSG00000174197	MGA	5050.44	-0.107361	0.0359669	0.765107
ENSG00000224281	SLC25A5-AS1	110.465	0.317522	0.0361971	0.767303
ENSG00000224536	AC096677.1	66.5628	0.412187	0.036203	0.767303
ENSG00000101460	MAP1LC3A	87.0196	0.400042	0.036425	0.767902
ENSG00000101546	RBFA	471.063	-0.188443	0.0363305	0.767902
ENSG00000248508	SRP14-AS1	122.728	0.330184	0.0364432	0.767902
ENSG00000267064	UXT-AS1	33.242	0.564259	0.0363554	0.767902
ENSG00000034713	GABARAPL2	1398.99	0.131695	0.0366046	0.769068
ENSG00000119977	TCTN3	1764.12	0.0971852	0.0365974	0.769068
ENSG00000164414	SLC35A1	37.2366	0.527235	0.0367753	0.771536
ENSG00000177058	SLC38A9	628.459	0.151795	0.0368996	0.773025
ENSG00000139112	GABARAPL1	783.045	0.147942	0.0369881	0.773444
ENSG00000196409	NA	213.558	0.26641	0.0370263	0.773444
ENSG00000205047	NA	85.1488	-0.425991	0.0371704	0.775337
ENSG00000005469	CROT	1046.92	-0.180468	0.0376082	0.776647
ENSG00000102900	NUP93	8285.08	0.092405	0.0374419	0.776647
ENSG00000146278	PNRC1	504.942	0.210549	0.0375706	0.776647
ENSG00000173530	TNFRSF10D	1732.09	0.115109	0.0373733	0.776647
ENSG00000176390	CRLF3	423.177	-0.169828	0.0375017	0.776647
ENSG00000198624	CCDC69	184.228	0.258417	0.037307	0.776647
ENSG00000273243	Z82243.1	37.9663	-0.568779	0.0374773	0.776647
ENSG00000151881	TMEM267	332.579	0.274708	0.0376858	0.777142
ENSG00000160321	ZNF208	80.0764	0.440518	0.0378232	0.778869
ENSG00000133835	HSD17B4	5455.77	-0.0931489	0.0380312	0.781244
ENSG00000172365	OR5B2	28.0876	-0.564369	0.0380464	0.781244
ENSG00000170954	ZNF415	526.156	0.192742	0.0383569	0.784677
ENSG00000189067	LITAF	2539.89	0.0934354	0.038376	0.784677
ENSG00000213866	YBX1P10	149.183	-0.389112	0.0383254	0.784677
ENSG00000170832	USP32	2076.86	-0.0944182	0.0385887	0.786977
ENSG00000240616	RPS6P25	35.8166	-0.523527	0.038597	0.786977
ENSG00000137309	HMGA1	4057.99	0.115782	0.0387023	0.788015
ENSG00000259612	EEF1A1P22	38.3347	-0.561776	0.0387721	0.788331
ENSG00000070540	WIPI1	150.179	-0.28222	0.0388349	0.788501
ENSG00000163814	CDCP1	4201.17	-0.0917868	0.038987	0.788697
ENSG00000171503	ETFDH	1126.83	0.104712	0.0390078	0.788697
ENSG00000185900	POMK	2257.32	-0.108451	0.0389794	0.788697
ENSG00000140534	TICRR	2325.72	-0.13835	0.0391078	0.789617
ENSG00000197355	UAP1L1	538.914	0.210973	0.0391908	0.790194
ENSG00000131899	LLGL1	1243.68	0.136029	0.0396465	0.797593
ENSG00000163884	KLF15	602.505	-0.15254	0.0396678	0.797593
ENSG00000120334	CENPL	687.444	-0.125501	0.0398604	0.800325
ENSG00000189362	NEMP2	168.749	-0.246781	0.0399141	0.800325
ENSG00000112981	NME5	128.703	0.347002	0.0404134	0.80285
ENSG00000126778	SIX1	159.195	-0.237712	0.0404277	0.80285
ENSG00000141232	TOB1	4263.68	0.0838904	0.0403618	0.80285
ENSG00000170044	ZPLD1	293.459	0.316471	0.0402007	0.80285
ENSG00000186212	SOWAHB	614.843	0.172878	0.0402976	0.80285
ENSG00000205189	ZBTB10	2691.54	-0.281467	0.0403096	0.80285
ENSG00000224259	LINC01133	189.583	0.339086	0.0403931	0.80285
ENSG00000100393	EP300	6142.54	-0.0925461	0.04087	0.806644
ENSG00000116127	ALMS1	1580.34	-0.133241	0.0407355	0.806644
ENSG00000132436	FIGNL1	2791.77	0.122494	0.0408975	0.806644
ENSG00000157851	DPYSL5	797.324	0.154673	0.0409526	0.806644
ENSG00000169252	ADRB2	970.601	-0.134039	0.0409045	0.806644
ENSG00000186480	INSIG1	2203.08	-0.134204	0.0408415	0.806644
ENSG00000132155	RAF1	4344.48	-0.0907945	0.0410859	0.806702
ENSG00000135124	P2RX4	643.272	0.17138	0.0411275	0.806702
ENSG00000136813	ECPAS	7605.64	-0.0767759	0.0411278	0.806702
ENSG00000148180	GSN	233.52	-0.268295	0.0411782	0.806702
ENSG00000143590	EFNA3	333.692	0.240825	0.0414312	0.810565
ENSG00000122512	PMS2	1643.71	0.109816	0.041566	0.812105
ENSG00000040341	STAU2	1027.88	0.134634	0.0417959	0.814849
ENSG00000229715	EEF1DP3	140.283	-0.291374	0.0418188	0.814849
ENSG00000184497	TMEM255B	24.2716	0.631525	0.0421103	0.819426
ENSG00000116729	WLS	594.07	0.16329	0.0423334	0.819597
ENSG00000164024	METAP1	1982.76	-0.128335	0.0423452	0.819597
ENSG00000260874	AC106820.5	49.9065	-0.512709	0.0421873	0.819597
ENSG00000272872	AP000525.1	50.1203	-0.503565	0.0422707	0.819597
ENSG00000011105	TSPAN9	1070.73	0.134532	0.0424208	0.819966
ENSG00000271151	AC016737.1	35.8865	0.548875	0.0427412	0.825059
ENSG00000100697	DICER1	4014.75	-0.15463	0.0429699	0.82837
ENSG00000014641	MDH1	2957.71	0.12967	0.043187	0.83145
ENSG00000080298	RFX3	614.749	0.187887	0.0434326	0.831701
ENSG00000100167	2003-09-01	2759.04	0.080596	0.0434869	0.831701
ENSG00000104067	TJP1	12083.8	-0.0683514	0.0434442	0.831701
ENSG00000111653	ING4	431.419	0.19196	0.0433273	0.831701
ENSG00000152137	HSPB8	23.79	0.768435	0.0433759	0.831701
ENSG00000011677	GABRA3	218.114	0.226469	0.0439505	0.832183
ENSG00000019549	SNAI2	40.9149	-0.48131	0.0436329	0.832183
ENSG00000115275	MOGS	883.357	-0.13871	0.0438196	0.832183
ENSG00000139266	2009-03-01	456.828	0.198531	0.0438235	0.832183
ENSG00000140263	SORD	15182.1	-0.0928305	0.0439123	0.832183
ENSG00000171202	TMEM126A	678.93	0.171433	0.0437776	0.832183
ENSG00000242094	FOXP1-IT1	116.757	-0.413625	0.0436726	0.832183
ENSG00000250012	AC079848.1	32.3582	0.554563	0.0439713	0.832183
ENSG00000111837	MAK	110.577	-0.284028	0.0441183	0.832791
ENSG00000169692	AGPAT2	525.551	0.228553	0.0441006	0.832791
ENSG00000116141	MARK1	354.797	0.197108	0.0442287	0.83307
ENSG00000243279	PRAF2	116.301	0.340493	0.0442481	0.83307
ENSG00000242110	AMACR	88.1048	-0.362689	0.044322	0.83338
ENSG00000100902	PSMA6	336.68	-0.234428	0.0447444	0.836117
ENSG00000164211	STARD4	316.158	-0.277754	0.0447559	0.836117
ENSG00000204175	GPRIN2	52.282	0.4774	0.0446859	0.836117
ENSG00000228109	MELTF-AS1	145.852	0.265557	0.0447116	0.836117
ENSG00000249392	AC096588.1	81.208	0.354922	0.0446974	0.836117
ENSG00000146677	AC004453.1	120.805	-0.51438	0.0450619	0.840749
ENSG00000115993	TRAK2	2181.18	0.114377	0.0452031	0.842301
ENSG00000119139	TJP2	1577.24	-0.120876	0.0453395	0.842676
ENSG00000234618	RPSAP9	31.3149	-0.643649	0.0453387	0.842676
ENSG00000132964	CDK8	818.242	0.15845	0.0457808	0.846727
ENSG00000160695	VPS11	553.54	0.166694	0.0458363	0.846727
ENSG00000164244	PRRC1	2846.12	-0.0903089	0.0458495	0.846727
ENSG00000187097	ENTPD5	2096.64	0.0975546	0.0457046	0.846727
ENSG00000255693	LINC02389	76.781	-0.496884	0.0458141	0.846727
ENSG00000232024	LSM12P1	35.1276	0.504777	0.0460143	0.848689
ENSG00000085274	MYNN	1475.08	0.197696	0.046125	0.849259
ENSG00000140525	FANCI	4564.65	-0.0960413	0.0461624	0.849259
ENSG00000117595	IRF6	1843.17	0.106103	0.0462258	0.849348
ENSG00000100991	TRPC4AP	2767.38	0.0984007	0.0463917	0.849648
ENSG00000136490	LIMD2	67.3147	0.443373	0.0465352	0.849648
ENSG00000137502	RAB30	558.294	0.223524	0.0464415	0.849648
ENSG00000143013	LMO4	1037.05	0.128546	0.0465337	0.849648
ENSG00000257218	GATC	1078.9	0.106785	0.0464008	0.849648
ENSG00000111144	LTA4H	2027.61	0.104068	0.0469743	0.856587
ENSG00000163399	ATP1A1	17530.5	-0.0856238	0.0471292	0.858331
ENSG00000101040	ZMYND8	4443.89	-0.0882955	0.0475049	0.859903
ENSG00000101104	PABPC1L	638.573	-0.221478	0.0473779	0.859903
ENSG00000129946	SHC2	58.4769	0.450547	0.0474194	0.859903
ENSG00000232104	RFX3-AS1	25.5358	0.663741	0.0473586	0.859903
ENSG00000272033	AL136984.1	27.3675	-0.617637	0.0475121	0.859903
ENSG00000171962	DRC3	198.672	-0.233307	0.0476521	0.860771
ENSG00000235944	ZNF815P	97.347	0.32141	0.0476788	0.860771
ENSG00000187522	HSPA14	1913.69	0.110055	0.0479213	0.864074
ENSG00000117362	APH1A	1043.99	0.116772	0.0481104	0.866406
ENSG00000250486	FAM218A	76.408	0.369464	0.0481784	0.866554
ENSG00000212304	SNORD12	101.475	-0.298084	0.0482858	0.867408
ENSG00000102317	RBM3	3638.27	0.116949	0.0484328	0.868972
ENSG00000184378	ACTRT3	96.3822	0.367847	0.0485498	0.869995
ENSG00000099875	MKNK2	8284.7	0.103234	0.0486519	0.870749
ENSG00000169499	PLEKHA2	125.551	0.326923	0.0488619	0.873429
ENSG00000166295	ANAPC16	1558.77	0.12603	0.0489975	0.873699
ENSG00000168126	OR2W6P	57.013	-0.540533	0.0489444	0.873699
ENSG00000112419	PHACTR2	924.109	-0.151398	0.0491386	0.874119
ENSG00000231793	DOC2GP	31.0272	-0.614335	0.0491417	0.874119
ENSG00000095321	CRAT	1045.46	0.174681	0.0493378	0.87431
ENSG00000137693	YAP1	1966.68	0.141088	0.0492681	0.87431
ENSG00000188010	MORN2	199.624	0.279235	0.0494287	0.87431
ENSG00000267106	ZNF561-AS1	428.207	0.184744	0.0493793	0.87431
ENSG00000272760	AC093726.1	26.1541	-0.701017	0.049454	0.87431
ENSG00000173786	CNP	532.951	0.159011	0.0497737	0.8788
ENSG00000227038	GTF2IP7	34.1706	0.52793	0.0498292	0.8788
ENSG00000112276	BVES	73.3615	0.389809	0.0498901	0.878804
ENSG00000188404	SELL	37.9968	0.524168	0.0500838	0.880626
ENSG00000257122	RRN3P3	119.923	-0.290923	0.050115	0.880626
ENSG00000213401	MAGEA12	68.4169	0.419827	0.0503489	0.883667
ENSG00000068383	INPP5A	1618.28	0.118347	0.0505594	0.884576
ENSG00000078114	NEBL	477.51	0.230995	0.0508851	0.884576
ENSG00000090097	PCBP4	429.874	0.196257	0.0505979	0.884576
ENSG00000101940	WDR13	666.922	0.165068	0.051072	0.884576
ENSG00000102098	SCML2	672.859	-0.127224	0.0507691	0.884576
ENSG00000115970	THADA	1209.54	-0.137668	0.0508174	0.884576
ENSG00000116668	SWT1	110.646	-0.402749	0.0510521	0.884576
ENSG00000120907	ADRA1A	65.1879	0.444534	0.0510022	0.884576
ENSG00000145632	PLK2	1555.16	-0.113362	0.0507262	0.884576
ENSG00000182359	KBTBD3	106.609	0.387735	0.0509114	0.884576
ENSG00000197324	LRP10	3120.33	0.125239	0.051046	0.884576
ENSG00000158186	MRAS	427.5	0.157776	0.0515824	0.892351
ENSG00000179152	TCAIM	1810.8	0.116405	0.0518473	0.894781
ENSG00000185442	FAM174B	1505.86	-0.111958	0.0518665	0.894781
ENSG00000229180	AC006001.3	357.378	-0.248821	0.0519081	0.894781
ENSG00000100629	CEP128	565.208	-0.198891	0.0527475	0.896638
ENSG00000104361	NIPAL2	427.361	0.205531	0.0524215	0.896638
ENSG00000124813	RUNX2	73.6102	-0.338806	0.0525243	0.896638
ENSG00000131711	MAP1B	38177	-0.171728	0.0525859	0.896638
ENSG00000137337	MDC1	1063.17	-0.149552	0.052831	0.896638
ENSG00000159082	SYNJ1	763.102	-0.185306	0.0521475	0.896638
ENSG00000159322	ADPGK	2359.79	-0.0808341	0.0528692	0.896638
ENSG00000161835	GRASP	38.463	0.507775	0.0527842	0.896638
ENSG00000167721	TSR1	4587.59	-0.093687	0.0524852	0.896638
ENSG00000168826	ZBTB49	187.259	-0.219216	0.0525963	0.896638
ENSG00000235499	AC073046.1	139.649	-0.295263	0.0525228	0.896638
ENSG00000253369	AC131902.1	129.94	0.298909	0.0526092	0.896638
ENSG00000253729	PRKDC	27003.3	-0.115673	0.0522499	0.896638
ENSG00000264469	NA	37.698	-0.530856	0.0528816	0.896638
ENSG00000129173	E2F8	770.615	-0.133311	0.0529561	0.896851
ENSG00000167566	NCKAP5L	345.437	0.193832	0.0532167	0.900213
ENSG00000005889	ZFX	1928.65	-0.104884	0.0533469	0.900461
ENSG00000225377	NRSN2-AS1	224.148	-0.21983	0.0533556	0.900461
ENSG00000115310	RTN4	3281.27	0.161829	0.0534522	0.901042
ENSG00000157741	UBN2	2442.82	-0.151655	0.0536399	0.902937
ENSG00000175344	CHRNA7	29.5586	-0.565693	0.0536892	0.902937
ENSG00000188573	FBLL1	26.7266	-0.575078	0.0541543	0.908652
ENSG00000270574	AC010680.2	48.8302	-0.49289	0.0541063	0.908652
ENSG00000081181	ARG2	2988.64	0.113392	0.0545109	0.909459
ENSG00000110435	PDHX	2499.75	-0.0766657	0.0545463	0.909459
ENSG00000115648	MLPH	2254.53	-0.13208	0.0546416	0.909459
ENSG00000156508	EEF1A1	83897.1	0.11656	0.0545674	0.909459
ENSG00000160199	PKNOX1	903.425	0.111567	0.0545243	0.909459
ENSG00000206075	SERPINB5	349.814	0.204407	0.0543086	0.909459
ENSG00000272079	AC004233.3	93.1969	0.328695	0.0546331	0.909459
ENSG00000005249	PRKAR2B	773.284	0.15089	0.0553014	0.912065
ENSG00000116984	MTR	3151.93	-0.124662	0.0552025	0.912065
ENSG00000157601	MX1	94.8231	0.32591	0.0550316	0.912065
ENSG00000167470	MIDN	4807.95	0.113505	0.0550918	0.912065
ENSG00000179933	C14orf119	1267.66	0.125169	0.0551609	0.912065
ENSG00000187475	HIST1H1T	35.6853	-0.527423	0.0552796	0.912065
ENSG00000213901	SLC23A3	44.4564	-0.521133	0.055047	0.912065
ENSG00000258904	AL157871.5	34.1679	-0.533657	0.0550747	0.912065
ENSG00000043514	TRIT1	1022.2	-0.105089	0.0554443	0.913382
ENSG00000253636	AC022893.1	84.5663	-0.406858	0.0555113	0.913447
ENSG00000066468	FGFR2	49.4392	-0.483593	0.0559404	0.914834
ENSG00000074319	TSG101	1931.55	0.110848	0.0562098	0.914834
ENSG00000102580	DNAJC3	1891.28	-0.128392	0.0562205	0.914834
ENSG00000111879	FAM184A	64.0194	0.350196	0.0562266	0.914834
ENSG00000132326	PER2	1429.38	-0.112336	0.0560457	0.914834
ENSG00000180228	PRKRA	752.438	0.151018	0.0560988	0.914834
ENSG00000224660	SH3BP5-AS1	477.479	-0.244626	0.0559747	0.914834
ENSG00000232093	DCST1-AS1	158.17	0.235347	0.0559337	0.914834
ENSG00000263602	MIR3185	58.8765	0.467884	0.0556884	0.914834
ENSG00000269889	AC078802.1	41.2599	0.47608	0.0560398	0.914834
ENSG00000128581	IFT22	930.546	0.14364	0.0563177	0.915288
ENSG00000137767	SQOR	134.427	0.347581	0.0567886	0.921909
ENSG00000017373	NA	240.604	0.34121	0.0570393	0.922878
ENSG00000182768	NGRN	847.826	0.150498	0.0570094	0.922878
ENSG00000185129	PURA	2749.63	0.155316	0.0569779	0.922878
ENSG00000101846	STS	275.75	-0.177375	0.0571659	0.923895
ENSG00000103121	CMC2	1444.02	-0.128047	0.0574323	0.925406
ENSG00000113448	PDE4D	1243.13	0.150038	0.0574508	0.925406
ENSG00000166033	HTRA1	83.1413	0.351447	0.0573733	0.925406
ENSG00000184117	NIPSNAP1	4200.14	0.11616	0.0577398	0.926971
ENSG00000196549	MME	30322.9	0.112072	0.0577375	0.926971
ENSG00000236624	NA	123.441	0.244158	0.0576841	0.926971
ENSG00000163683	SMIM14	1221.07	0.134913	0.0578107	0.927082
ENSG00000151715	TMEM45B	112.948	0.297504	0.0580964	0.928943
ENSG00000154743	TSEN2	1123.67	-0.114573	0.0581328	0.928943
ENSG00000198715	GLMP	1214.73	-0.147116	0.05804	0.928943
ENSG00000232599	AL008707.1	33.8149	-0.540479	0.0581831	0.928943
ENSG00000057252	SOAT1	1350.12	-0.187297	0.0584107	0.931552
ENSG00000166575	TMEM135	861.025	0.211143	0.0585734	0.932096
ENSG00000272142	LYRM4-AS1	57.2069	0.413985	0.0585664	0.932096
ENSG00000132680	KHDC4	1777.27	-0.132449	0.0586571	0.932403
ENSG00000087586	AURKA	2022.56	0.08607	0.0588819	0.933575
ENSG00000231177	LINC00852	135.451	-0.261781	0.0588162	0.933575
ENSG00000250608	AC010210.1	47.8283	-0.491916	0.058924	0.933575
ENSG00000146733	PSPH	1676.29	0.128059	0.0592006	0.936933
ENSG00000186472	PCLO	927.391	-0.162662	0.0592907	0.937336
ENSG00000099958	DERL3	86.2743	-0.307384	0.0595169	0.937439
ENSG00000112941	TENT4A	1578.67	-0.0899247	0.0598834	0.937439
ENSG00000113916	BCL6	2495.65	0.0940654	0.0598455	0.937439
ENSG00000114316	USP4	1752.14	-0.085444	0.0599439	0.937439
ENSG00000120889	TNFRSF10B	5482.8	-0.0648294	0.0597775	0.937439
ENSG00000138363	ATIC	7014.64	0.0728015	0.0598549	0.937439
ENSG00000141295	SCRN2	207.756	0.272631	0.0597197	0.937439
ENSG00000146409	SLC18B1	428.146	0.17417	0.0598059	0.937439
ENSG00000162298	SYVN1	1751.02	-0.120951	0.0597949	0.937439
ENSG00000182093	WRB	685.951	0.137974	0.0596561	0.937439
ENSG00000159256	MORC3	739.339	0.185231	0.0601235	0.939235
ENSG00000198945	L3MBTL3	352.916	-0.192461	0.0602407	0.940053
ENSG00000181458	TMEM45A	50.4691	0.423004	0.0603837	0.941272
ENSG00000100330	MTMR3	2133.87	-0.0820808	0.0606093	0.942618
ENSG00000249855	EEF1A1P19	73.4687	-0.373411	0.0606651	0.942618
ENSG00000267216	AC020915.1	47.7081	-0.449519	0.0606027	0.942618
ENSG00000064995	TAF11	915.417	0.140361	0.060762	0.943113
ENSG00000136854	STXBP1	1428.04	0.101679	0.0611001	0.945195
ENSG00000160211	G6PD	1813.57	0.118319	0.0609714	0.945195
ENSG00000188707	ZBED6CL	95.5077	-0.304261	0.061157	0.945195
ENSG00000205683	DPF3	56.5935	-0.429802	0.0611415	0.945195
ENSG00000196369	SRGAP2B	176.486	0.217951	0.0612357	0.945404
ENSG00000198156	NPIPB6	42.4593	0.548233	0.0614033	0.945976
ENSG00000234494	SP2-AS1	221.818	0.218323	0.0613587	0.945976
ENSG00000120896	SORBS3	789.161	0.164321	0.0615396	0.947006
ENSG00000166946	CCNDBP1	655.445	0.143482	0.0616661	0.947006
ENSG00000171295	ZNF440	971.673	-0.118171	0.0616154	0.947006
ENSG00000113924	HGD	260.161	-0.215926	0.0618643	0.949044
ENSG00000179241	LDLRAD3	961.342	-0.118478	0.0619628	0.949551
ENSG00000049089	COL9A2	124.861	0.298949	0.0621443	0.950831
ENSG00000204060	FOXO6	58.6392	0.420412	0.0621775	0.950831
ENSG00000131845	ZNF304	999.481	-0.0973541	0.0623847	0.951852
ENSG00000140105	WARS	3972.1	0.0749951	0.0625726	0.951852
ENSG00000150316	CWC15	1408.52	0.14447	0.0624717	0.951852
ENSG00000156052	GNAQ	315.45	-0.226484	0.0623944	0.951852
ENSG00000270246	NA	221.117	-0.213665	0.0625219	0.951852
ENSG00000034677	RNF19A	876.479	0.169714	0.0628299	0.953001
ENSG00000083168	KAT6A	3927.71	-0.14059	0.0627979	0.953001
ENSG00000109320	NFKB1	2610.95	0.0826513	0.0628453	0.953001
ENSG00000172819	RARG	724.629	0.125235	0.0630029	0.954392
ENSG00000073350	LLGL2	1410.45	0.171928	0.0631567	0.954727
ENSG00000249348	UGDH-AS1	180.235	0.234202	0.0631419	0.954727
ENSG00000009765	IYD	123.374	-0.267612	0.0636312	0.955919
ENSG00000107968	MAP3K8	213.181	0.272578	0.0636181	0.955919
ENSG00000115163	CENPA	456.001	0.176899	0.0635853	0.955919
ENSG00000140199	SLC12A6	823.455	0.129151	0.0633687	0.955919
ENSG00000163870	TPRA1	1481.17	0.154052	0.0634398	0.955919
ENSG00000164976	MYORG	446.94	0.148774	0.0634945	0.955919
ENSG00000108175	ZMIZ1	9167.01	-0.128351	0.0638233	0.956845
ENSG00000147419	CCDC25	1466.88	0.117521	0.0638249	0.956845
ENSG00000154856	APCDD1	75.2503	0.368421	0.0640717	0.959554
ENSG00000144560	VGLL4	2536.77	0.075597	0.0641647	0.959851
ENSG00000188747	NOXA1	134.135	0.303452	0.0642367	0.959851
ENSG00000226763	SRRM5	36.9667	-0.478431	0.0642902	0.959851
ENSG00000116584	ARHGEF2	1134.93	0.142619	0.0647779	0.963706
ENSG00000133874	RNF122	209.559	0.215922	0.0648808	0.963706
ENSG00000137962	ARHGAP29	2262.86	0.216363	0.064615	0.963706
ENSG00000173801	JUP	4832.16	0.109581	0.0648163	0.963706
ENSG00000250802	ZBED3-AS1	253.32	-0.21255	0.0647199	0.963706
ENSG00000243701	DUBR	380.649	-0.182038	0.0650507	0.965241
ENSG00000006468	ETV1	418.243	-0.162784	0.0653163	0.965689
ENSG00000121104	FAM117A	475.818	0.175141	0.0653474	0.965689
ENSG00000158711	ELK4	6919.18	-0.164599	0.0651818	0.965689
ENSG00000188987	NA	38.8155	-0.471824	0.0652581	0.965689
ENSG00000038382	TRIO	3865.52	-0.113448	0.0655095	0.966116
ENSG00000146233	CYP39A1	98.4258	0.328388	0.0654688	0.966116
ENSG00000035664	DAPK2	192.369	0.2487	0.0656473	0.967164
ENSG00000127838	PNKD	1797.29	-0.125267	0.0658655	0.969394
ENSG00000253368	TRNP1	206.588	0.234432	0.066068	0.971387
ENSG00000070495	JMJD6	901.395	-0.134445	0.0662036	0.972395
ENSG00000121440	PDZRN3	444.049	-0.153864	0.066388	0.9725
ENSG00000143149	ALDH9A1	3104.49	0.086515	0.0664267	0.9725
ENSG00000229056	AC020571.1	101.684	-0.337545	0.0664791	0.9725
ENSG00000251363	LINC02315	51.8143	0.456997	0.0663921	0.9725
ENSG00000104518	GSDMD	23.6412	0.758298	0.0669497	0.975447
ENSG00000105696	TMEM59L	133.83	0.308917	0.0668675	0.975447
ENSG00000182379	NXPH4	834.355	0.161053	0.0667832	0.975447
ENSG00000273192	AL671710.1	24.3772	-0.612105	0.0668837	0.975447
ENSG00000102606	ARHGEF7	1434.92	-0.101344	0.0671655	0.976628
ENSG00000125434	SLC25A35	317.859	0.196996	0.0671291	0.976628
ENSG00000180104	EXOC3	1350.45	0.110629	0.0673422	0.978216
ENSG00000234432	AC092171.3	246.681	0.241933	0.0674426	0.978694
ENSG00000121957	GPSM2	752.704	0.123693	0.0676624	0.979287
ENSG00000168228	ZCCHC4	483.876	-0.148571	0.0676919	0.979287
ENSG00000198646	NCOA6	3179.82	-0.0984719	0.0677315	0.979287
ENSG00000216775	AL109918.1	244.499	0.208811	0.0677537	0.979287
ENSG00000158683	PKD1L1	23.0342	-0.713416	0.0679347	0.980926
ENSG00000065328	MCM10	2293.84	-0.0842429	0.0683875	0.985501
ENSG00000145934	TENM2	252.112	-0.228439	0.0683423	0.985501
ENSG00000005810	MYCBP2	22498.3	-0.106413	0.0686011	0.986642
ENSG00000145736	GTF2H2	1302.68	0.141243	0.0687046	0.986642
ENSG00000177181	RIMKLA	850.596	0.116389	0.0686485	0.986642
ENSG00000198339	NA	32.4654	-0.518513	0.068739	0.986642
ENSG00000099284	H2AFY2	1652.82	0.128943	0.0695092	0.988549
ENSG00000129518	EAPP	993.494	0.140544	0.069649	0.988549
ENSG00000133640	LRRIQ1	32.6524	0.523656	0.0694419	0.988549
ENSG00000166224	SGPL1	3348.21	0.0650886	0.0694196	0.988549
ENSG00000173230	GOLGB1	6524.77	-0.187515	0.0691697	0.988549
ENSG00000180535	BHLHA15	164.975	-0.25783	0.0690695	0.988549
ENSG00000184489	PTP4A3	220.766	0.210373	0.0695743	0.988549
ENSG00000184517	ZFP1	364.756	0.17343	0.0695273	0.988549
ENSG00000185920	PTCH1	1985.04	-0.0850621	0.0696901	0.988549
ENSG00000198046	ZNF667	668.23	-0.140872	0.0691592	0.988549
ENSG00000244041	LINC01011	66.1363	0.343597	0.0696746	0.988549
ENSG00000268201	AC020915.2	30.0515	-0.605443	0.0693252	0.988549
ENSG00000049246	PER3	2057.66	-0.080771	0.0706684	0.989477
ENSG00000091136	LAMB1	299.406	0.188716	0.0699334	0.989477
ENSG00000099860	GADD45B	127.24	-0.295522	0.0702823	0.989477
ENSG00000107362	ABHD17B	359.886	0.194796	0.0708414	0.989477
ENSG00000124508	BTN2A2	333.371	0.195746	0.0701462	0.989477
ENSG00000127603	MACF1	9135.72	-0.130325	0.070764	0.989477
ENSG00000135775	COG2	1319.05	0.094747	0.070264	0.989477
ENSG00000171790	SLFNL1	44.8449	-0.427075	0.0712207	0.989477
ENSG00000178226	PRSS36	29.3827	0.597673	0.0709101	0.989477
ENSG00000185267	CDNF	42.7126	-0.460197	0.0709575	0.989477
ENSG00000197457	STMN3	70.6792	0.384177	0.0698336	0.989477
ENSG00000219023	AL033519.2	22.2733	-0.734094	0.0708012	0.989477
ENSG00000224614	TNK2-AS1	46.7236	0.438909	0.0710442	0.989477
ENSG00000226259	GTF2H2B	351.315	0.215602	0.070449	0.989477
ENSG00000228903	RASA4CP	80.1738	0.333461	0.0706752	0.989477
ENSG00000241634	AC069499.1	37.6906	-0.461704	0.0702619	0.989477
ENSG00000245552	AP000787.1	123.293	-0.336032	0.0711674	0.989477
ENSG00000249859	PVT1	2065.12	-0.128166	0.0711563	0.989477
ENSG00000255545	AP004608.1	22.5706	0.672541	0.0706008	0.989477
ENSG00000257698	AC084033.3	67.3717	0.366934	0.0711339	0.989477
ENSG00000264940	SNORD3C	543.188	-0.469563	0.0702306	0.989477
ENSG00000270578	AP000787.2	86.1283	-0.327099	0.0712571	0.989477
ENSG00000005059	MCUB	21.8687	0.674004	0.0718437	0.992138
ENSG00000100372	SLC25A17	1409.2	0.118104	0.0720116	0.992138
ENSG00000108588	CCDC47	5163.19	-0.0894195	0.072313	0.992138
ENSG00000157483	MYO1E	851.602	-0.098215	0.0724008	0.992138
ENSG00000165434	PGM2L1	107.963	0.317346	0.0716817	0.992138
ENSG00000171045	TSNARE1	125.246	0.296642	0.0722872	0.992138
ENSG00000173137	ADCK5	139.525	0.273807	0.0717481	0.992138
ENSG00000180035	ZNF48	736.392	0.175171	0.0724386	0.992138
ENSG00000180066	C10orf91	67.4928	0.34727	0.0724074	0.992138
ENSG00000197147	LRRC8B	1555.77	-0.12633	0.0716522	0.992138
ENSG00000198700	IPO9	5219.98	-0.0603547	0.0723593	0.992138
ENSG00000235897	TM4SF19-AS1	45.6352	0.3983	0.071538	0.992138
ENSG00000250220	AC053527.1	29.7058	-0.53952	0.0722924	0.992138
ENSG00000250420	AACSP1	241.201	-0.218463	0.0724753	0.992138
ENSG00000256940	AP001453.2	47.9961	0.414336	0.0718783	0.992138
ENSG00000006327	TNFRSF12A	284.1	0.257529	0.0727436	0.994871
ENSG00000184381	PLA2G6	1152.9	0.121042	0.0729142	0.996265
ENSG00000079950	STX7	613.894	0.154267	0.0731883	0.998129
ENSG00000140836	ZFHX3	5971.58	-0.132188	0.0731602	0.998129
ENSG00000000003	TSPAN6	346.783	0.0673432	0.525293	0.999801
ENSG00000000419	DPM1	1105.3	0.0879248	0.299886	0.999801
ENSG00000000457	SCYL3	428.73	0.0755792	0.383494	0.999801
ENSG00000000460	C1orf112	701.653	0.0650518	0.42994	0.999801
ENSG00000001036	FUCA2	1474.09	0.00796236	0.88158	0.999801
ENSG00000001084	GCLC	472.871	-0.0706829	0.353841	0.999801
ENSG00000001167	NFYA	1400.96	0.0273565	0.629795	0.999801
ENSG00000001460	STPG1	227.291	0.0776948	0.467193	0.999801
ENSG00000001461	NIPAL3	2262.89	-0.00122702	0.977984	0.999801
ENSG00000001497	LAS1L	1898.48	0.0172486	0.889631	0.999801
ENSG00000001561	ENPP4	350.463	0.188737	0.215441	0.999801
ENSG00000001617	SEMA3F	975.933	0.0185206	0.784829	0.999801
ENSG00000001629	ANKIB1	1583.72	0.000490353	0.992754	0.999801
ENSG00000001630	CYP51A1	143.044	-0.101076	0.528805	0.999801
ENSG00000001631	KRIT1	1129.65	-0.0154953	0.894542	0.999801
ENSG00000002016	RAD52	429.97	-0.0238248	0.772662	0.999801
ENSG00000002330	BAD	1271.93	0.105086	0.34372	0.999801
ENSG00000002549	LAP3	2202.09	0.0351623	0.559082	0.999801
ENSG00000002587	HS3ST1	340.13	0.0848871	0.389726	0.999801
ENSG00000002822	MAD1L1	382.995	-0.00380633	0.991424	0.999801
ENSG00000002919	SNX11	556.203	0.0383421	0.610042	0.999801
ENSG00000003056	M6PR	2148.18	0.0511219	0.296705	0.999801
ENSG00000003096	KLHL13	106.683	0.223571	0.156547	0.999801
ENSG00000003147	ICA1	1324.56	0.0508662	0.309114	0.999801
ENSG00000003249	DBNDD1	1418.39	0.108915	0.121823	0.999801
ENSG00000003393	ALS2	1019.77	-0.00830123	0.891935	0.999801
ENSG00000003400	CASP10	32.4798	0.299231	0.346967	0.999801
ENSG00000003402	CFLAR	1865.36	-0.0861568	0.118808	0.999801
ENSG00000003436	TFPI	1635.3	-0.0406726	0.704175	0.999801
ENSG00000003509	NDUFAF7	360.053	0.0593787	0.569326	0.999801
ENSG00000003756	RBM5	2992.65	-0.0413071	0.386632	0.999801
ENSG00000003989	SLC7A2	1728.91	-0.0568507	0.407203	0.999801
ENSG00000004059	ARF5	1989.92	0.0166894	0.865752	0.999801
ENSG00000004139	SARM1	238.17	-0.0776829	0.457684	0.999801
ENSG00000004142	POLDIP2	3267.45	0.0711007	0.305821	0.999801
ENSG00000004399	PLXND1	26.7269	0.0514215	0.880562	0.999801
ENSG00000004455	AK2	5354.13	0.0158738	0.746028	0.999801
ENSG00000004478	FKBP4	14286	0.0368609	0.531418	0.999801
ENSG00000004487	KDM1A	3432.33	-0.00681491	0.861213	0.999801
ENSG00000004534	RBM6	1907.49	-0.0369733	0.618899	0.999801
ENSG00000004660	CAMKK1	1172.14	-0.0239702	0.757915	0.999801
ENSG00000004700	RECQL	1156.71	-0.00856176	0.928597	0.999801
ENSG00000004766	VPS50	452.579	0.0581797	0.61099	0.999801
ENSG00000004777	ARHGAP33	362.903	0.0253723	0.846121	0.999801
ENSG00000004779	NDUFAB1	2845.76	0.00512688	0.942263	0.999801
ENSG00000004838	ZMYND10	59.5743	0.0604594	0.768983	0.999801
ENSG00000004848	ARX	30.6845	0.238186	0.454068	0.999801
ENSG00000004864	SLC25A13	1497.19	-0.0693655	0.262069	0.999801
ENSG00000004897	CDC27	2715.64	0.0228614	0.835507	0.999801
ENSG00000004961	HCCS	480.783	0.106201	0.26884	0.999801
ENSG00000004975	DVL2	1921.36	0.031457	0.607011	0.999801
ENSG00000005001	PRSS22	26.4726	-0.333186	0.309051	0.999801
ENSG00000005007	UPF1	4075.94	-0.0932237	0.422362	0.999801
ENSG00000005020	SKAP2	1320.63	0.0644391	0.383454	0.999801
ENSG00000005022	SLC25A5	11973.8	0.0504196	0.392142	0.999801
ENSG00000005075	POLR2J	1009.45	0.0706529	0.519174	0.999801
ENSG00000005100	DHX33	1863.66	-0.0813117	0.0913759	0.999801
ENSG00000005156	LIG3	2296.05	-0.0203121	0.669745	0.999801
ENSG00000005175	RPAP3	1064.14	-0.00949095	0.936813	0.999801
ENSG00000005187	ACSM3	739.47	-0.0433448	0.561868	0.999801
ENSG00000005194	CIAPIN1	2129.01	0.0281421	0.645036	0.999801
ENSG00000005206	SPPL2B	1175.81	-0.01548	0.873538	0.999801
ENSG00000005238	FAM214B	546.11	-0.0546199	0.496354	0.999801
ENSG00000005302	MSL3	698.557	0.0871882	0.258979	0.999801
ENSG00000005339	CREBBP	4677.24	-0.0650446	0.234985	0.999801
ENSG00000005379	TSPOAP1	85.0519	-0.0544654	0.816335	0.999801
ENSG00000005436	GCFC2	766.887	-0.0459016	0.68065	0.999801
ENSG00000005448	WDR54	402.533	0.0472887	0.652716	0.999801
ENSG00000005483	KMT2E	3069.47	-0.0308881	0.568533	0.999801
ENSG00000005486	RHBDD2	501.883	0.0842285	0.470985	0.999801
ENSG00000005513	SOX8	400.178	0.0747397	0.483779	0.999801
ENSG00000005700	IBTK	1540.37	-0.0106157	0.923801	0.999801
ENSG00000005801	ZNF195	1595.29	0.0116473	0.859423	0.999801
ENSG00000005812	FBXL3	1157.59	0.0382903	0.679845	0.999801
ENSG00000005882	PDK2	815.465	0.0772841	0.307299	0.999801
ENSG00000005893	LAMP2	5036.45	0.0811045	0.355141	0.999801
ENSG00000005955	NA	1180.83	0.0109094	0.860046	0.999801
ENSG00000006007	GDE1	3015.24	0.087803	0.0867359	0.999801
ENSG00000006015	REX1BD	662.715	-0.0523216	0.652704	0.999801
ENSG00000006042	TMEM98	1449.48	0.118581	0.0835934	0.999801
ENSG00000006047	YBX2	50.2943	-0.265486	0.335806	0.999801
ENSG00000006062	MAP3K14	413.583	-0.0673601	0.523838	0.999801
ENSG00000006071	ABCC8	58.6899	0.0174689	0.934597	0.999801
ENSG00000006114	NA	3061.55	0.050003	0.341181	0.999801
ENSG00000006118	TMEM132A	3875.67	0.0910562	0.428839	0.999801
ENSG00000006125	AP2B1	6212.31	-0.0510138	0.149449	0.999801
ENSG00000006194	ZNF263	1594.07	0.0389858	0.520916	0.999801
ENSG00000006282	SPATA20	3958.4	0.104037	0.115463	0.999801
ENSG00000006283	CACNA1G	29.3038	0.6387	0.0948235	0.999801
ENSG00000006432	MAP3K9	1066.57	-0.0227335	0.823455	0.999801
ENSG00000006451	RALA	896.933	0.0224677	0.784985	0.999801
ENSG00000006453	BAIAP2L1	2628	-0.0125601	0.793169	0.999801
ENSG00000006459	KDM7A	618.176	0.0930532	0.322225	0.999801
ENSG00000006530	AGK	1192.92	0.0199889	0.757449	0.999801
ENSG00000006534	ALDH3B1	29.4439	-0.259678	0.409107	0.999801
ENSG00000006576	PHTF2	1091.72	0.0544357	0.61578	0.999801
ENSG00000006607	FARP2	3186.33	-0.0138603	0.754435	0.999801
ENSG00000006625	GGCT	2927.96	-0.00912365	0.893947	0.999801
ENSG00000006634	DBF4	941.393	-0.0205773	0.861248	0.999801
ENSG00000006652	IFRD1	968.23	0.0853976	0.300908	0.999801
ENSG00000006695	COX10	816.691	0.0483103	0.512072	0.999801
ENSG00000006704	GTF2IRD1	790.337	0.0986736	0.176137	0.999801
ENSG00000006712	PAF1	1383.26	-0.0632075	0.800686	0.999801
ENSG00000006715	VPS41	1356.39	-0.0479981	0.488246	0.999801
ENSG00000006744	ELAC2	3761.43	0.000255464	0.99617	0.999801
ENSG00000006747	SCIN	47.3103	-0.06673	0.783686	0.999801
ENSG00000006756	ARSD	1176.21	0.0339413	0.595559	0.999801
ENSG00000006757	PNPLA4	487.06	0.0214177	0.805099	0.999801
ENSG00000006831	ADIPOR2	2835.06	0.0398032	0.397267	0.999801
ENSG00000006837	CDKL3	26.7986	0.161314	0.613665	0.999801
ENSG00000007047	MARK4	510.939	0.0881526	0.268091	0.999801
ENSG00000007080	CCDC124	2582.67	-0.0606336	0.537695	0.999801
ENSG00000007168	PAFAH1B1	4413.09	0.0940305	0.0814224	0.999801
ENSG00000007202	KIAA0100	17472.8	-0.0508695	0.231543	0.999801
ENSG00000007255	TRAPPC6A	275.243	0.0974256	0.365102	0.999801
ENSG00000007341	ST7L	857.927	0.0571233	0.460422	0.999801
ENSG00000007376	RPUSD1	1364.38	-0.0233744	0.77287	0.999801
ENSG00000007384	RHBDF1	960.216	-0.0561009	0.517199	0.999801
ENSG00000007392	LUC7L	1071.08	-0.0402451	0.54438	0.999801
ENSG00000007402	CACNA2D2	259.984	-0.120884	0.284284	0.999801
ENSG00000007516	BAIAP3	172.175	-0.135447	0.468186	0.999801
ENSG00000007520	TSR3	873.225	0.106851	0.383493	0.999801
ENSG00000007541	PIGQ	957.352	-0.0129866	0.881566	0.999801
ENSG00000007545	CRAMP1	509.06	-0.108352	0.264714	0.999801
ENSG00000007866	TEAD3	462.984	-0.051659	0.52652	0.999801
ENSG00000007923	DNAJC11	3358.38	-0.00748749	0.903642	0.999801
ENSG00000007944	MYLIP	654.659	0.0154144	0.809721	0.999801
ENSG00000007968	E2F2	765.362	-0.0303364	0.682593	0.999801
ENSG00000008018	PSMB1	3469.31	0.0642954	0.352599	0.999801
ENSG00000008083	JARID2	1290.88	-0.0432668	0.463093	0.999801
ENSG00000008086	CDKL5	121.025	-0.0480167	0.749171	0.999801
ENSG00000008128	CDK11A	26.1623	0.4537	0.141425	0.999801
ENSG00000008130	NADK	2650.73	0.0181976	0.686311	0.999801
ENSG00000008256	CYTH3	1933.15	0.0419394	0.372351	0.999801
ENSG00000008277	ADAM22	623.087	0.0467273	0.548226	0.999801
ENSG00000008282	SYPL1	2097.31	0.0496779	0.680389	0.999801
ENSG00000008283	CYB561	6240.24	-0.00581167	0.898631	0.999801
ENSG00000008294	SPAG9	2210.72	-0.0167912	0.750511	0.999801
ENSG00000008300	CELSR3	196.909	0.00311642	0.98733	0.999801
ENSG00000008311	AASS	317.729	-0.00959016	0.926252	0.999801
ENSG00000008323	PLEKHG6	21.6045	-0.423216	0.28563	0.999801
ENSG00000008324	SS18L2	576.015	0.0111026	0.897046	0.999801
ENSG00000008382	MPND	310.806	-0.0332904	0.918777	0.999801
ENSG00000008394	MGST1	4692.93	0.053488	0.425336	0.999801
ENSG00000008405	CRY1	985.469	0.0135633	0.840202	0.999801
ENSG00000008441	NFIX	29840.1	0.0565535	0.29771	0.999801
ENSG00000008710	PKD1	2980.28	0.0732836	0.717077	0.999801
ENSG00000008735	MAPK8IP2	428.597	-0.0727227	0.640271	0.999801
ENSG00000008838	MED24	2530.07	0.0399453	0.485212	0.999801
ENSG00000008853	RHOBTB2	1053.27	-0.112236	0.438018	0.999801
ENSG00000008869	HEATR5B	1556.1	-0.0334484	0.606277	0.999801
ENSG00000008952	SEC62	2830.04	-0.00585041	0.937434	0.999801
ENSG00000008988	RPS20	18703.9	0.089072	0.31135	0.999801
ENSG00000009307	CSDE1	27666.9	-0.00822919	0.83651	0.999801
ENSG00000009335	UBE3C	7087.72	-0.0244574	0.512824	0.999801
ENSG00000009413	REV3L	1491.93	-0.00728478	0.946483	0.999801
ENSG00000009780	FAM76A	409.703	0.0508376	0.587816	0.999801
ENSG00000009830	POMT2	736.125	-0.120465	0.0967125	0.999801
ENSG00000009950	MLXIPL	45.025	0.157164	0.573934	0.999801
ENSG00000009954	BAZ1B	2981.74	-0.0621353	0.5859	0.999801
ENSG00000010017	RANBP9	1374.02	0.0328281	0.572447	0.999801
ENSG00000010072	SPRTN	591.114	0.0845156	0.253829	0.999801
ENSG00000010165	METTL13	1747.43	-0.0650291	0.595315	0.999801
ENSG00000010219	DYRK4	343.029	0.00864168	0.940526	0.999801
ENSG00000010244	ZNF207	5662.01	0.0185855	0.687131	0.999801
ENSG00000010256	UQCRC1	5665.81	0.00492293	0.949122	0.999801
ENSG00000010270	STARD3NL	1163.56	0.0522766	0.500876	0.999801
ENSG00000010278	CD9	7965.93	0.0242842	0.712346	0.999801
ENSG00000010292	NCAPD2	9348.09	-0.0211112	0.601549	0.999801
ENSG00000010318	PHF7	310.237	-0.018327	0.870915	0.999801
ENSG00000010319	SEMA3G	163.555	-0.0535078	0.767846	0.999801
ENSG00000010322	NISCH	2897.81	-0.00436716	0.963427	0.999801
ENSG00000010361	FUZ	128.162	0.252571	0.141307	0.999801
ENSG00000010404	IDS	123.415	-0.0375256	0.805803	0.999801
ENSG00000010539	ZNF200	668.331	-0.0721359	0.287257	0.999801
ENSG00000010626	LRRC23	121.632	0.128621	0.41026	0.999801
ENSG00000010704	HFE	38.9259	0.00289025	0.991848	0.999801
ENSG00000010803	SCMH1	3301.93	-0.0377391	0.358274	0.999801
ENSG00000010810	FYN	103.015	0.0423468	0.838124	0.999801
ENSG00000010818	HIVEP2	1660.49	-0.0399189	0.506665	0.999801
ENSG00000011007	ELOA	2892.8	-0.0158871	0.689905	0.999801
ENSG00000011009	LYPLA2	1040.99	0.07451	0.374589	0.999801
ENSG00000011021	CLCN6	580.595	-0.0972283	0.309733	0.999801
ENSG00000011114	BTBD7	2271.78	-0.0577502	0.283646	0.999801
ENSG00000011132	APBA3	344.957	0.128028	0.251754	0.999801
ENSG00000011143	MKS1	755.043	0.0851408	0.213318	0.999801
ENSG00000011198	ABHD5	721.809	-0.00640291	0.927292	0.999801
ENSG00000011243	AKAP8L	1502.38	-0.0639506	0.544983	0.999801
ENSG00000011258	MBTD1	1023.55	0.0387795	0.651627	0.999801
ENSG00000011260	UTP18	1806.67	0.0436177	0.496123	0.999801
ENSG00000011275	RNF216	1436.21	0.00779803	0.878057	0.999801
ENSG00000011295	TTC19	2008.8	0.0107667	0.872273	0.999801
ENSG00000011304	PTBP1	13667.6	0.0114335	0.79252	0.999801
ENSG00000011332	DPF1	208.113	0.189355	0.0968851	0.999801
ENSG00000011347	SYT7	1075.84	0.036102	0.654107	0.999801
ENSG00000011376	LARS2	3270.58	0.0210733	0.609733	0.999801
ENSG00000011405	PIK3C2A	3018.54	-0.0748205	0.434793	0.999801
ENSG00000011426	ANLN	3865.44	-0.0277333	0.630811	0.999801
ENSG00000011451	WIZ	2940.53	-0.0179153	0.761475	0.999801
ENSG00000011454	RABGAP1	3516.93	-0.0297406	0.502076	0.999801
ENSG00000011478	QPCTL	180.917	0.12945	0.353174	0.999801
ENSG00000011485	PPP5C	2025.94	0.0176692	0.756086	0.999801
ENSG00000011566	MAP4K3	523.165	0.0237168	0.828138	0.999801
ENSG00000011638	TMEM159	532.249	0.0626134	0.425796	0.999801
ENSG00000012048	BRCA1	2819.42	-0.0914442	0.114174	0.999801
ENSG00000012061	ERCC1	999.59	0.0532037	0.556989	0.999801
ENSG00000012171	SEMA3B	152.528	0.12609	0.514567	0.999801
ENSG00000012174	MBTPS2	1551.99	0.00259552	0.977885	0.999801
ENSG00000012211	PRICKLE3	167.865	-0.110536	0.448417	0.999801
ENSG00000012223	LTF	37.8687	0.0194865	0.950119	0.999801
ENSG00000012232	EXTL3	1861.39	-0.0105593	0.842608	0.999801
ENSG00000012817	KDM5D	969.036	0.0330032	0.584352	0.999801
ENSG00000012822	CALCOCO1	413.302	0.00984661	0.936442	0.999801
ENSG00000012963	UBR7	1803.61	-0.0142594	0.804358	0.999801
ENSG00000012983	MAP4K5	1017.87	-0.0821835	0.374937	0.999801
ENSG00000013016	EHD3	605.788	0.0965251	0.219891	0.999801
ENSG00000013275	PSMC4	4025.87	0.0474763	0.479959	0.999801
ENSG00000013288	MAN2B2	1635.25	-0.0348183	0.50021	0.999801
ENSG00000013306	SLC25A39	4759.24	0.0572828	0.495873	0.999801
ENSG00000013364	MVP	281.888	0.0836561	0.549904	0.999801
ENSG00000013374	NUB1	1595.96	0.053368	0.201674	0.999801
ENSG00000013375	PGM3	1069.08	-0.0331288	0.628958	0.999801
ENSG00000013392	RWDD2A	659.058	-0.00369008	0.96364	0.999801
ENSG00000013441	CLK1	1066.37	0.0119746	0.890677	0.999801
ENSG00000013503	POLR3B	1780.02	0.0196749	0.704783	0.999801
ENSG00000013523	ANGEL1	1719.91	0.0631459	0.188582	0.999801
ENSG00000013561	RNF14	1519.45	0.0953292	0.177795	0.999801
ENSG00000013563	DNASE1L1	265.354	0.180352	0.149048	0.999801
ENSG00000013573	DDX11	1201.99	-0.106508	0.20006	0.999801
ENSG00000013583	HEBP1	846.973	0.0468275	0.503685	0.999801
ENSG00000013810	TACC3	4098.15	-0.0135898	0.863455	0.999801
ENSG00000014123	UFL1	1467.34	0.044721	0.623965	0.999801
ENSG00000014138	POLA2	1743.4	-0.0306196	0.555471	0.999801
ENSG00000014164	ZC3H3	833.743	-0.00986918	0.894717	0.999801
ENSG00000014216	CAPN1	3444.11	0.0639373	0.293825	0.999801
ENSG00000014824	SLC30A9	3646.51	0.103916	0.205669	0.999801
ENSG00000014914	MTMR11	62.3022	-0.0803268	0.721148	0.999801
ENSG00000014919	COX15	1306.12	-0.0312282	0.577869	0.999801
ENSG00000015133	CCDC88C	1260.4	-0.101209	0.656411	0.999801
ENSG00000015153	YAF2	345.73	-0.00487552	0.964287	0.999801
ENSG00000015171	ZMYND11	2440.57	0.0651214	0.231934	0.999801
ENSG00000015475	BID	448.658	0.0391931	0.696941	0.999801
ENSG00000015479	MATR3	13308.5	0.00741473	0.884169	0.999801
ENSG00000015532	XYLT2	484.016	0.0481264	0.74481	0.999801
ENSG00000015676	NUDCD3	2517.47	-0.0222948	0.626702	0.999801
ENSG00000016391	CHDH	2013.54	0.0101308	0.864367	0.999801
ENSG00000016864	GLT8D1	1149.38	-0.0456239	0.426049	0.999801
ENSG00000017260	ATP2C1	2969.24	0.0247399	0.702555	0.999801
ENSG00000017427	IGF1	184.261	-0.166479	0.183294	0.999801
ENSG00000017797	RALBP1	2185.89	-0.00981924	0.863722	0.999801
ENSG00000018189	RUFY3	784.827	-0.111749	0.161998	0.999801
ENSG00000018280	SLC11A1	46.1167	0.0833779	0.76362	0.999801
ENSG00000018408	WWTR1	53.3728	-0.36905	0.0888853	0.999801
ENSG00000018510	AGPS	1034.58	0.00459788	0.954506	0.999801
ENSG00000018610	CXorf56	815.945	0.103187	0.128969	0.999801
ENSG00000018699	TTC27	837.522	0.0325011	0.658928	0.999801
ENSG00000018869	ZNF582	176.201	0.01476	0.910359	0.999801
ENSG00000019144	PHLDB1	217.255	0.0975301	0.624345	0.999801
ENSG00000019485	PRDM11	78.0419	-0.0805481	0.654897	0.999801
ENSG00000019995	ZRANB1	967.7	0.00237512	0.965686	0.999801
ENSG00000020129	NCDN	2434.11	0.0441162	0.467687	0.999801
ENSG00000020181	ADGRA2	31.7006	0.0889511	0.773838	0.999801
ENSG00000020256	ZFP64	811.148	0.0408186	0.512852	0.999801
ENSG00000020426	MNAT1	490.341	0.0659186	0.47023	0.999801
ENSG00000020577	SAMD4A	40.6218	0.172157	0.549094	0.999801
ENSG00000020922	MRE11	881.612	0.00343913	0.966674	0.999801
ENSG00000021574	SPAST	780.737	0.0182202	0.843584	0.999801
ENSG00000021762	OSBPL5	1566.4	-0.0591549	0.613463	0.999801
ENSG00000021776	AQR	2673.13	-0.0172164	0.832315	0.999801
ENSG00000021826	CPS1	490.998	0.0162975	0.841623	0.999801
ENSG00000022277	RTF2	1417.21	0.0636098	0.281784	0.999801
ENSG00000022556	NLRP2	1115.96	0.0417993	0.529521	0.999801
ENSG00000022567	SLC45A4	439.296	0.0449578	0.584608	0.999801
ENSG00000022840	RNF10	6203.5	0.0346065	0.417774	0.999801
ENSG00000022976	ZNF839	724.116	0.0479299	0.489331	0.999801
ENSG00000023041	ZDHHC6	1286.21	-0.00259092	0.966961	0.999801
ENSG00000023191	RNH1	2070.78	0.00593802	0.936439	0.999801
ENSG00000023228	NDUFS1	5163.16	-0.012203	0.711436	0.999801
ENSG00000023287	RB1CC1	1498.05	0.0214567	0.834785	0.999801
ENSG00000023318	ERP44	1620.91	-0.0159386	0.846489	0.999801
ENSG00000023330	ALAS1	2609.57	0.0487512	0.313448	0.999801
ENSG00000023445	BIRC3	91.3598	-0.00956373	0.959464	0.999801
ENSG00000023516	AKAP11	3485.93	-0.0275656	0.750465	0.999801
ENSG00000023572	GLRX2	448.63	-0.151525	0.316992	0.999801
ENSG00000023608	SNAPC1	177.121	-0.136092	0.226134	0.999801
ENSG00000023697	DERA	669.157	0.120982	0.115299	0.999801
ENSG00000023734	STRAP	4892.31	0.0465913	0.466942	0.999801
ENSG00000023892	DEF6	302.355	-0.0476224	0.715574	0.999801
ENSG00000023902	PLEKHO1	46.381	0.0338087	0.898435	0.999801
ENSG00000023909	GCLM	1006.47	0.0154696	0.854421	0.999801
ENSG00000024048	UBR2	1206.59	-0.0618722	0.407612	0.999801
ENSG00000024526	DEPDC1	863.567	-0.129378	0.394448	0.999801
ENSG00000024862	CCDC28A	166.575	0.175023	0.20703	0.999801
ENSG00000025039	RRAGD	297.334	-0.08701	0.436558	0.999801
ENSG00000025156	HSF2	448.32	0.00413275	0.969447	0.999801
ENSG00000025293	PHF20	3136.8	0.00611094	0.860151	0.999801
ENSG00000025423	HSD17B6	25.692	-0.28067	0.292508	0.999801
ENSG00000025434	NR1H3	418.866	0.0274428	0.770624	0.999801
ENSG00000025708	TYMP	192.22	0.0752856	0.685955	0.999801
ENSG00000025770	NCAPH2	1095.72	0.0393675	0.685058	0.999801
ENSG00000025772	TOMM34	1639.29	0.00182975	0.979251	0.999801
ENSG00000025796	SEC63	2878.79	-0.0365264	0.709999	0.999801
ENSG00000025800	KPNA6	4593.05	0.0183757	0.653618	0.999801
ENSG00000026036	RTEL1-TNFRSF6B	36.854	-0.0286906	0.922336	0.999801
ENSG00000026103	FAS	157.282	0.00971643	0.952215	0.999801
ENSG00000026297	RNASET2	486.98	-0.0574819	0.641919	0.999801
ENSG00000026559	KCNG1	189.753	0.10802	0.424986	0.999801
ENSG00000026950	BTN3A1	193.715	-0.0821333	0.520619	0.999801
ENSG00000027001	MIPEP	1055.26	-0.0576276	0.385964	0.999801
ENSG00000027075	PRKCH	471.74	-0.160997	0.100558	0.999801
ENSG00000027697	IFNGR1	531.807	-0.0335264	0.723855	0.999801
ENSG00000027847	B4GALT7	613.106	0.067713	0.443565	0.999801
ENSG00000028116	VRK2	419.123	0.121069	0.252702	0.999801
ENSG00000028203	VEZT	2868.96	0.0625428	0.26259	0.999801
ENSG00000028310	BRD9	1027.43	0.00318769	0.978892	0.999801
ENSG00000028528	SNX1	3233.21	0.0301984	0.505929	0.999801
ENSG00000028839	TBPL1	588.96	-0.0538251	0.668783	0.999801
ENSG00000029153	ARNTL2	499.211	-0.085315	0.420419	0.999801
ENSG00000029363	BCLAF1	8606.13	0.0137195	0.828262	0.999801
ENSG00000029364	SLC39A9	5627.98	0.036893	0.533207	0.999801
ENSG00000029639	TFB1M	270.219	-0.0903869	0.382904	0.999801
ENSG00000029725	RABEP1	3460.85	-0.0395074	0.43935	0.999801
ENSG00000029993	HMGB3	974.297	0.0145733	0.833149	0.999801
ENSG00000030066	NUP160	3476.1	-0.0674549	0.161568	0.999801
ENSG00000030110	BAK1	615.609	0.0780892	0.308366	0.999801
ENSG00000030419	IKZF2	86.0944	-0.0017362	0.99302	0.999801
ENSG00000030582	GRN	1507.45	0.116361	0.159912	0.999801
ENSG00000031003	FAM13B	2174.4	0.0608551	0.430391	0.999801
ENSG00000031081	ARHGAP31	31.7604	0.211613	0.517117	0.999801
ENSG00000031691	CENPQ	187.626	0.0257922	0.87994	0.999801
ENSG00000031698	SARS	5413.52	0.103507	0.111627	0.999801
ENSG00000031823	RANBP3	2441.19	-0.0132174	0.80701	0.999801
ENSG00000032219	ARID4A	531.985	0.161793	0.136735	0.999801
ENSG00000032389	EIPR1	803.122	-0.026989	0.692368	0.999801
ENSG00000032444	PNPLA6	1392.62	0.0236772	0.810972	0.999801
ENSG00000032742	IFT88	493.392	0.009423	0.921078	0.999801
ENSG00000033011	ALG1	1504.35	-0.00669678	0.926821	0.999801
ENSG00000033030	ZCCHC8	877.884	-0.0276887	0.709732	0.999801
ENSG00000033050	ABCF2	3555.29	-0.00933217	0.862607	0.999801
ENSG00000033100	CHPF2	1200.31	-0.036857	0.588914	0.999801
ENSG00000033122	LRRC7	63.8852	0.225145	0.361709	0.999801
ENSG00000033170	FUT8	597.83	-0.0178279	0.826891	0.999801
ENSG00000033178	UBA6	2122.32	0.00407674	0.977445	0.999801
ENSG00000033327	GAB2	38.8432	0.410465	0.167128	0.999801
ENSG00000033627	ATP6V0A1	1733.23	0.0171201	0.774414	0.999801
ENSG00000033800	PIAS1	1247.62	-0.0906184	0.17117	0.999801
ENSG00000033867	SLC4A7	2436.68	-0.0498366	0.603254	0.999801
ENSG00000034053	APBA2	1503.69	0.0662829	0.273671	0.999801
ENSG00000034063	NA	1484.52	-0.134092	0.620068	0.999801
ENSG00000034152	MAP2K3	2923.77	0.0622874	0.281157	0.999801
ENSG00000034510	TMSB10	4774.97	0.102841	0.295348	0.999801
ENSG00000034533	ASTE1	366.659	-0.104067	0.253694	0.999801
ENSG00000034693	PEX3	368.152	-0.0186312	0.842786	0.999801
ENSG00000035115	SH3YL1	322.934	-0.00579875	0.962298	0.999801
ENSG00000035141	FAM136A	1567.46	0.0358746	0.616177	0.999801
ENSG00000035499	DEPDC1B	1445.45	0.0424733	0.481194	0.999801
ENSG00000035687	ADSS	1182.97	0.0607053	0.506193	0.999801
ENSG00000035928	RFC1	4019.87	-0.0347772	0.516726	0.999801
ENSG00000036054	TBC1D23	709.399	0.106401	0.32495	0.999801
ENSG00000036257	CUL3	2189.71	-0.038574	0.650046	0.999801
ENSG00000036530	CYP46A1	59.301	-0.088279	0.738955	0.999801
ENSG00000036549	AC118549.1	2774.68	0.00777241	0.903733	0.999801
ENSG00000036672	USP2	403.438	0.0450346	0.614281	0.999801
ENSG00000037042	TUBG2	410.7	-0.00430891	0.965775	0.999801
ENSG00000037241	RPL26L1	1279.08	0.0814766	0.405258	0.999801
ENSG00000037280	FLT4	53.0341	0.253025	0.366384	0.999801
ENSG00000037474	NSUN2	4017.73	-0.0571792	0.134632	0.999801
ENSG00000037637	FBXO42	1140.54	-0.0859338	0.0788895	0.999801
ENSG00000037749	MFAP3	2139.53	0.0126422	0.886807	0.999801
ENSG00000037757	MRI1	783.219	-0.131436	0.0788244	0.999801
ENSG00000037897	METTL1	562.239	-0.0467368	0.619471	0.999801
ENSG00000038210	PI4K2B	763.965	-0.00477137	0.960163	0.999801
ENSG00000038219	BOD1L1	1948.47	-0.149954	0.398913	0.999801
ENSG00000038274	MAT2B	852.943	0.00485211	0.952907	0.999801
ENSG00000038358	EDC4	1490.76	-0.0224538	0.743414	0.999801
ENSG00000038532	CLEC16A	1446.26	-0.0258428	0.679974	0.999801
ENSG00000039068	CDH1	17620.7	-0.00723927	0.853895	0.999801
ENSG00000039123	MTREX	2329.1	0.0252742	0.768894	0.999801
ENSG00000039319	ZFYVE16	1905.18	-0.0013242	0.991729	0.999801
ENSG00000039523	RIPOR1	2396.25	-0.0183292	0.799677	0.999801
ENSG00000039560	RAI14	1410.26	-0.00292929	0.957015	0.999801
ENSG00000039650	PNKP	831.867	-0.0335157	0.736873	0.999801
ENSG00000040199	PHLPP2	1551.23	-0.0833245	0.124388	0.999801
ENSG00000040275	SPDL1	1132.7	0.0598577	0.484976	0.999801
ENSG00000040487	PQLC2	220.68	0.0775433	0.515956	0.999801
ENSG00000040531	CTNS	458.444	-0.0682318	0.427447	0.999801
ENSG00000040608	RTN4R	201.679	-0.156259	0.211737	0.999801
ENSG00000040633	PHF23	1947.98	0.0603739	0.441888	0.999801
ENSG00000040933	INPP4A	787.86	-0.0436768	0.490133	0.999801
ENSG00000041353	RAB27B	337.488	-0.0154614	0.906231	0.999801
ENSG00000041357	PSMA4	4850.2	0.0570141	0.533544	0.999801
ENSG00000041802	LSG1	3484.28	-0.0302935	0.470964	0.999801
ENSG00000041988	THAP3	421.918	-0.137196	0.291404	0.999801
ENSG00000042286	AIFM2	173.341	-0.0559418	0.691843	0.999801
ENSG00000042317	SPATA7	248.601	-0.0781698	0.527744	0.999801
ENSG00000042429	MED17	1453.3	0.0634562	0.403492	0.999801
ENSG00000042445	RETSAT	1714.52	-0.00817603	0.874068	0.999801
ENSG00000042753	AP2S1	3080.61	-0.0422081	0.561713	0.999801
ENSG00000043093	DCUN1D1	1821.59	0.161448	0.282517	0.999801
ENSG00000043143	JADE2	500.645	0.099087	0.269093	0.999801
ENSG00000043591	ADRB1	49.9848	0.140558	0.549879	0.999801
ENSG00000044090	CUL7	610.907	-0.013698	0.894798	0.999801
ENSG00000044115	CTNNA1	10476.5	0.0128958	0.732583	0.999801
ENSG00000044446	PHKA2	862.147	-0.111474	0.132094	0.999801
ENSG00000044459	CNTLN	599.779	-0.0127656	0.90873	0.999801
ENSG00000044524	EPHA3	2776.5	-0.0016128	0.971471	0.999801
ENSG00000044574	HSPA5	19232.7	-0.074066	0.0779475	0.999801
ENSG00000046604	DSG2	12799.2	-0.0662013	0.370426	0.999801
ENSG00000046647	GEMIN8	555.995	-0.0106851	0.896771	0.999801
ENSG00000046651	OFD1	457.48	-0.0335998	0.746344	0.999801
ENSG00000046653	GPM6B	38.7913	-0.310713	0.298993	0.999801
ENSG00000046889	PREX2	35.3871	-0.229239	0.367541	0.999801
ENSG00000047056	WDR37	1027.82	-0.0219356	0.737402	0.999801
ENSG00000047188	YTHDC2	2228.16	-0.0173311	0.825219	0.999801
ENSG00000047230	CTPS2	1514.62	0.0225027	0.62035	0.999801
ENSG00000047249	ATP6V1H	1321.15	-0.0403947	0.476604	0.999801
ENSG00000047315	POLR2B	6725.31	0.0345217	0.56069	0.999801
ENSG00000047346	FAM214A	2604.48	-0.0418057	0.744646	0.999801
ENSG00000047365	ARAP2	313.592	-0.101031	0.439054	0.999801
ENSG00000047410	TPR	4931.51	-0.102402	0.252788	0.999801
ENSG00000047457	CP	29.6986	0.312861	0.317936	0.999801
ENSG00000047578	KIAA0556	1843.85	-0.034472	0.534976	0.999801
ENSG00000047579	DTNBP1	292.748	-0.0626112	0.592709	0.999801
ENSG00000047621	C12orf4	684.077	-0.0525487	0.618372	0.999801
ENSG00000047634	SCML1	555.338	-0.00205505	0.982706	0.999801
ENSG00000047644	WWC3	789.019	0.0849115	0.219898	0.999801
ENSG00000047648	ARHGAP6	1654.76	-0.0093499	0.866914	0.999801
ENSG00000047662	FAM184B	47.6416	0.22712	0.3883	0.999801
ENSG00000047849	MAP4	11456.9	0.00709616	0.858018	0.999801
ENSG00000047932	GOPC	795.527	-0.0122036	0.89829	0.999801
ENSG00000048028	USP28	1041.6	-0.0566334	0.309384	0.999801
ENSG00000048140	TSPAN17	1609	0.0629487	0.355726	0.999801
ENSG00000048162	NOP16	1975.01	-0.0494673	0.559826	0.999801
ENSG00000048342	CC2D2A	352.731	0.111356	0.186691	0.999801
ENSG00000048392	RRM2B	1580.72	0.0672133	0.502306	0.999801
ENSG00000048405	ZNF800	1136.97	0.00779324	0.944823	0.999801
ENSG00000048471	SNX29	932.22	0.0232393	0.725488	0.999801
ENSG00000048544	MRPS10	541.782	0.0399727	0.728863	0.999801
ENSG00000048649	RSF1	2282.59	0.0435153	0.607425	0.999801
ENSG00000048828	FAM120A	11018.4	-0.0296603	0.382483	0.999801
ENSG00000048991	R3HDM1	2242.08	-0.00306941	0.95718	0.999801
ENSG00000049130	KITLG	89.2979	0.15727	0.489932	0.999801
ENSG00000049167	ERCC8	302.681	0.0173036	0.887949	0.999801
ENSG00000049239	H6PD	3348.96	-0.018992	0.731907	0.999801
ENSG00000049245	VAMP3	1881.9	0.0632427	0.394351	0.999801
ENSG00000049283	EPN3	3235.02	-0.0357257	0.607044	0.999801
ENSG00000049323	LTBP1	150.519	-0.0973559	0.565203	0.999801
ENSG00000049449	RCN1	3058.76	0.0263438	0.492717	0.999801
ENSG00000049541	RFC2	1211.05	-0.0269162	0.705471	0.999801
ENSG00000049618	ARID1B	2502.53	-0.0261464	0.608457	0.999801
ENSG00000049656	CLPTM1L	4200.78	-0.00243838	0.965766	0.999801
ENSG00000049768	FOXP3	25.4664	-0.0967791	0.788697	0.999801
ENSG00000049769	PPP1R3F	48.8937	-0.248415	0.295974	0.999801
ENSG00000049860	HEXB	2219.45	0.0595727	0.364508	0.999801
ENSG00000049883	PTCD2	750.81	0.0427584	0.593862	0.999801
ENSG00000050030	NEXMIF	49.8058	0.0196162	0.93036	0.999801
ENSG00000050130	JKAMP	1236.79	0.12175	0.250744	0.999801
ENSG00000050327	ARHGEF5	480.994	0.024993	0.888055	0.999801
ENSG00000050344	NFE2L3	442.868	0.0114824	0.900787	0.999801
ENSG00000050393	MCUR1	1148.88	0.0453917	0.530716	0.999801
ENSG00000050405	LIMA1	1676.31	0.0256759	0.6819	0.999801
ENSG00000050426	LETMD1	1474.1	0.0158936	0.787376	0.999801
ENSG00000050748	MAPK9	1763.02	0.00499333	0.932262	0.999801
ENSG00000050820	BCAR1	1671.28	0.0159569	0.869182	0.999801
ENSG00000051009	FAM160A2	939.881	0.0749051	0.227694	0.999801
ENSG00000051108	HERPUD1	2362.03	-0.0257183	0.621585	0.999801
ENSG00000051128	HOMER3	125.046	-0.127336	0.490392	0.999801
ENSG00000051180	RAD51	463.799	0.0692068	0.402682	0.999801
ENSG00000051382	PIK3CB	2516.22	0.0164414	0.855347	0.999801
ENSG00000051596	THOC3	788.889	0.0940486	0.268643	0.999801
ENSG00000052126	PLEKHA5	1200.26	0.00797617	0.894528	0.999801
ENSG00000052344	PRSS8	1420.82	0.0741489	0.389818	0.999801
ENSG00000052723	SIKE1	1705.93	-0.0153673	0.883093	0.999801
ENSG00000052749	RRP12	2702.41	-0.0637645	0.59445	0.999801
ENSG00000052802	MSMO1	804.676	0.100225	0.627494	0.999801
ENSG00000052841	TTC17	2264.46	-0.0669265	0.31604	0.999801
ENSG00000052850	ALX4	186.568	-0.0816233	0.518326	0.999801
ENSG00000053254	FOXN3	2767.79	0.0284413	0.664528	0.999801
ENSG00000053371	AKR7A2	961.498	0.0868823	0.288201	0.999801
ENSG00000053372	MRTO4	1638.1	-0.0281913	0.671334	0.999801
ENSG00000053501	USE1	662.964	0.0343669	0.730929	0.999801
ENSG00000053524	MCF2L2	126.425	0.0783865	0.688322	0.999801
ENSG00000053747	LAMA3	7467.02	-0.0961961	0.0967602	0.999801
ENSG00000053770	AP5M1	1053.63	0.102941	0.320196	0.999801
ENSG00000053900	ANAPC4	649.007	-0.0872395	0.410506	0.999801
ENSG00000053918	KCNQ1	181.125	0.248912	0.142791	0.999801
ENSG00000054116	TRAPPC3	1784.86	-0.020547	0.746934	0.999801
ENSG00000054118	THRAP3	8566.21	-0.0632766	0.250793	0.999801
ENSG00000054148	PHPT1	1516.98	0.0694902	0.447462	0.999801
ENSG00000054179	ENTPD2	262.367	0.0387377	0.751594	0.999801
ENSG00000054267	ARID4B	1560.94	-0.0615586	0.467606	0.999801
ENSG00000054277	OPN3	50.965	-0.107173	0.630187	0.999801
ENSG00000054282	SDCCAG8	678.058	0.0665782	0.317756	0.999801
ENSG00000054523	KIF1B	7504.02	-0.0253278	0.547824	0.999801
ENSG00000054611	TBC1D22A	756.908	0.0753502	0.372288	0.999801
ENSG00000054654	SYNE2	4223.97	-0.0510553	0.524249	0.999801
ENSG00000054690	PLEKHH1	2308.74	0.0649171	0.279122	0.999801
ENSG00000054793	ATP9A	3589.65	0.0558545	0.22581	0.999801
ENSG00000054965	FAM168A	2485.94	0.0190062	0.697797	0.999801
ENSG00000054967	RELT	260.292	0.112596	0.374884	0.999801
ENSG00000055044	NOP58	3866.09	-0.0348183	0.538778	0.999801
ENSG00000055070	SZRD1	3985.16	0.0299673	0.633143	0.999801
ENSG00000055118	KCNH2	29.8409	-0.459719	0.156664	0.999801
ENSG00000055130	CUL1	2705.69	0.00144313	0.976152	0.999801
ENSG00000055147	FAM114A2	850.75	-0.0217593	0.759439	0.999801
ENSG00000055163	CYFIP2	1987.15	0.0642332	0.230683	0.999801
ENSG00000055208	TAB2	1546.74	-0.0493453	0.604302	0.999801
ENSG00000055211	GINM1	632.002	-0.0177708	0.870851	0.999801
ENSG00000055332	EIF2AK2	1330.2	-0.0632332	0.526305	0.999801
ENSG00000055483	USP36	1581.4	-0.0539092	0.46195	0.999801
ENSG00000055609	KMT2C	8651.44	-0.0902311	0.161263	0.999801
ENSG00000055917	PUM2	3905.62	-0.0200548	0.743116	0.999801
ENSG00000055950	MRPL43	794.663	0.0380798	0.64122	0.999801
ENSG00000056050	HPF1	403.114	0.106629	0.465701	0.999801
ENSG00000056097	ZFR	3452.62	0.0196468	0.701041	0.999801
ENSG00000056277	ZNF280C	432.259	-0.0993173	0.346051	0.999801
ENSG00000056586	RC3H2	5777.99	-0.0256121	0.694784	0.999801
ENSG00000056661	NA	2110.32	0.10413	0.131044	0.999801
ENSG00000056736	IL17RB	614.467	0.0393318	0.663412	0.999801
ENSG00000056972	TRAF3IP2	533.727	0.0484909	0.528956	0.999801
ENSG00000056998	GYG2	152.971	0.165638	0.31645	0.999801
ENSG00000057019	DCBLD2	173.549	-0.120032	0.408046	0.999801
ENSG00000057294	PKP2	220.797	0.0824903	0.499927	0.999801
ENSG00000057468	MSH4	37.3783	0.105098	0.714088	0.999801
ENSG00000057608	GDI2	9996.56	0.0417666	0.446006	0.999801
ENSG00000057663	ATG5	805.705	0.0368373	0.707646	0.999801
ENSG00000057704	TMCC3	43.1947	-0.446691	0.0796047	0.999801
ENSG00000057757	PITHD1	1048.35	-0.0487501	0.388841	0.999801
ENSG00000057935	MTA3	1082.32	0.0495333	0.346101	0.999801
ENSG00000058056	USP13	2716.22	-0.0341304	0.453274	0.999801
ENSG00000058063	ATP11B	6105.98	-0.0490564	0.618106	0.999801
ENSG00000058091	CDK14	1976.84	0.00262086	0.963072	0.999801
ENSG00000058262	SEC61A1	17478.8	-0.00302514	0.941976	0.999801
ENSG00000058272	PPP1R12A	3179.52	0.0316514	0.674594	0.999801
ENSG00000058404	CAMK2B	578.467	0.0358659	0.77514	0.999801
ENSG00000058453	CROCC	115.553	-0.309941	0.241601	0.999801
ENSG00000058668	ATP2B4	4238.7	-0.0522708	0.252173	0.999801
ENSG00000058673	ZC3H11A	5237.29	-0.102451	0.106843	0.999801
ENSG00000058729	RIOK2	924.085	-0.0172743	0.863381	0.999801
ENSG00000058799	YIPF1	929.701	-0.0725056	0.26265	0.999801
ENSG00000058804	NDC1	3288.2	-0.00857932	0.931628	0.999801
ENSG00000059122	FLYWCH1	835.909	0.0461691	0.818314	0.999801
ENSG00000059145	UNKL	1459.07	0.0151778	0.834566	0.999801
ENSG00000059377	TBXAS1	213.757	-0.00614385	0.961166	0.999801
ENSG00000059573	ALDH18A1	5610.28	-0.00290619	0.947728	0.999801
ENSG00000059588	TARBP1	1036.11	-0.00605066	0.950484	0.999801
ENSG00000059691	GATB	727.782	0.0641158	0.487195	0.999801
ENSG00000059728	MXD1	268.773	-0.128955	0.179309	0.999801
ENSG00000059758	CDK17	350.822	0.0536604	0.590076	0.999801
ENSG00000059769	DNAJC25	293.67	-0.0437994	0.714982	0.999801
ENSG00000059915	PSD	89.4071	0.119259	0.526773	0.999801
ENSG00000060069	CTDP1	507.668	-0.0296091	0.921184	0.999801
ENSG00000060138	YBX3	6117.84	-0.0603462	0.182832	0.999801
ENSG00000060140	STYK1	367.928	-0.143827	0.12208	0.999801
ENSG00000060339	CCAR1	4501.92	-0.0350692	0.564467	0.999801
ENSG00000060491	OGFR	671.557	-0.100326	0.79257	0.999801
ENSG00000060642	PIGV	639.181	0.00626815	0.92319	0.999801
ENSG00000060656	PTPRU	1076.79	-0.0318817	0.647534	0.999801
ENSG00000060688	SNRNP40	2935.6	-0.0644302	0.251174	0.999801
ENSG00000060749	QSER1	2834.19	0.0148849	0.895583	0.999801
ENSG00000060762	MPC1	316.224	0.0856792	0.407679	0.999801
ENSG00000060971	ACAA1	2642.53	-0.111116	0.078167	0.999801
ENSG00000060982	BCAT1	31.7029	0.27893	0.384446	0.999801
ENSG00000061273	HDAC7	1368.64	0.0104043	0.876395	0.999801
ENSG00000061656	SPAG4	36.2358	0.138107	0.650764	0.999801
ENSG00000061676	NCKAP1	3656.35	-0.0231963	0.831292	0.999801
ENSG00000061794	MRPS35	3054.8	0.00464383	0.943033	0.999801
ENSG00000061936	SFSWAP	1575.54	0.00654034	0.929913	0.999801
ENSG00000061938	TNK2	1132.19	0.0168349	0.912822	0.999801
ENSG00000061987	MON2	2930.5	-0.0939009	0.237502	0.999801
ENSG00000062194	GPBP1	2701.54	0.0339285	0.650159	0.999801
ENSG00000062282	DGAT2	1332.25	0.0819865	0.209337	0.999801
ENSG00000062370	ZNF112	126.68	0.0619382	0.69786	0.999801
ENSG00000062485	CS	12056	-0.0356273	0.300644	0.999801
ENSG00000062650	WAPL	1647.67	0.00311154	0.961046	0.999801
ENSG00000062716	VMP1	3678.73	0.00907871	0.887166	0.999801
ENSG00000062725	APPBP2	1687.5	-0.023325	0.830432	0.999801
ENSG00000062822	POLD1	1308.54	-0.0722098	0.459419	0.999801
ENSG00000063046	EIF4B	26547	0.0196714	0.745371	0.999801
ENSG00000063127	SLC6A16	180.92	0.271085	0.149549	0.999801
ENSG00000063169	BICRA	528.362	-0.0520176	0.583432	0.999801
ENSG00000063176	SPHK2	612.483	0.0664075	0.596904	0.999801
ENSG00000063177	RPL18	12660.4	0.0507136	0.625988	0.999801
ENSG00000063180	CA11	71.3	-0.156546	0.518387	0.999801
ENSG00000063241	ISOC2	2313.17	-0.0470035	0.618652	0.999801
ENSG00000063244	U2AF2	8640.15	0.0624126	0.39478	0.999801
ENSG00000063245	EPN1	6725.15	0.0665002	0.34268	0.999801
ENSG00000063322	MED29	2963.73	0.081386	0.0903924	0.999801
ENSG00000063438	AHRR	28.5666	-0.11934	0.731368	0.999801
ENSG00000063587	ZNF275	62.1763	-0.156389	0.426846	0.999801
ENSG00000063601	MTMR1	754.756	0.00222408	0.973103	0.999801
ENSG00000063660	GPC1	720.605	0.116505	0.126759	0.999801
ENSG00000063761	ADCK1	404.963	0.0123203	0.881323	0.999801
ENSG00000063854	HAGH	1300.18	0.038694	0.684019	0.999801
ENSG00000063978	RNF4	3510.83	-0.0248271	0.637828	0.999801
ENSG00000064012	CASP8	586.676	-0.0286184	0.762666	0.999801
ENSG00000064102	INTS13	1364.19	0.00913154	0.890001	0.999801
ENSG00000064115	TM7SF3	2644.52	0.00103684	0.980005	0.999801
ENSG00000064195	DLX3	46.5317	0.111197	0.700333	0.999801
ENSG00000064199	SPA17	344.663	0.0962422	0.34936	0.999801
ENSG00000064270	ATP2C2	729.867	-0.0422248	0.730519	0.999801
ENSG00000064309	CDON	637.056	0.0360951	0.641546	0.999801
ENSG00000064313	TAF2	1368.53	-0.0917526	0.247245	0.999801
ENSG00000064419	TNPO3	3591.72	-0.0546464	0.145062	0.999801
ENSG00000064490	RFXANK	1047.09	0.154247	0.0938553	0.999801
ENSG00000064545	TMEM161A	916.264	-0.0389465	0.682752	0.999801
ENSG00000064547	LPAR2	415.236	0.0322949	0.724393	0.999801
ENSG00000064601	CTSA	944.225	0.037882	0.571729	0.999801
ENSG00000064607	SUGP2	3962.51	0.00277061	0.953865	0.999801
ENSG00000064651	SLC12A2	1931.69	0.0551181	0.584748	0.999801
ENSG00000064652	SNX24	117.655	0.225023	0.144455	0.999801
ENSG00000064655	EYA2	40.1965	-0.0783914	0.767361	0.999801
ENSG00000064666	CNN2	1577.06	-0.0561146	0.387726	0.999801
ENSG00000064687	ABCA7	903.886	0.00440153	0.972213	0.999801
ENSG00000064703	DDX20	1109.84	-0.0442037	0.626869	0.999801
ENSG00000064726	BTBD1	2426.68	0.0646935	0.38876	0.999801
ENSG00000064787	BCAS1	33.2325	-0.341403	0.327732	0.999801
ENSG00000064932	SBNO2	3483.05	-0.0161383	0.90803	0.999801
ENSG00000064933	PMS1	655.603	-0.00142562	0.9919	0.999801
ENSG00000064961	HMG20B	4286.33	-0.00466991	0.949744	0.999801
ENSG00000064999	ANKS1A	1307.92	-0.00605233	0.918333	0.999801
ENSG00000065000	AP3D1	6797.68	-0.0504137	0.665238	0.999801
ENSG00000065029	ZNF76	966.963	-0.00331874	0.959663	0.999801
ENSG00000065054	SLC9A3R2	2039.25	-0.138693	0.154072	0.999801
ENSG00000065057	NTHL1	495.241	0.0153764	0.888498	0.999801
ENSG00000065060	UHRF1BP1	3429.84	-0.0044633	0.917564	0.999801
ENSG00000065135	GNAI3	2521.34	-0.0509173	0.508554	0.999801
ENSG00000065150	IPO5	6644.72	-0.0397204	0.442022	0.999801
ENSG00000065154	OAT	136.622	0.0299939	0.815253	0.999801
ENSG00000065183	WDR3	4345.57	-0.0510816	0.293988	0.999801
ENSG00000065243	PKN2	1947.9	0.0674994	0.48828	0.999801
ENSG00000065268	WDR18	1303.33	0.0200787	0.821068	0.999801
ENSG00000065308	TRAM2	621.043	-0.0368848	0.594814	0.999801
ENSG00000065357	DGKA	166.446	-0.162328	0.259865	0.999801
ENSG00000065361	ERBB3	5928.24	-0.0426769	0.333494	0.999801
ENSG00000065413	ANKRD44	534.195	0.00891044	0.905237	0.999801
ENSG00000065427	KARS	7281.91	0.00348015	0.945089	0.999801
ENSG00000065457	ADAT1	1283.64	-0.071068	0.136485	0.999801
ENSG00000065491	TBC1D22B	469.917	-0.0794245	0.315798	0.999801
ENSG00000065548	ZC3H15	2048.39	0.0177633	0.81689	0.999801
ENSG00000065559	MAP2K4	1950.29	0.0157219	0.827632	0.999801
ENSG00000065600	TMEM206	452.792	0.0832077	0.296445	0.999801
ENSG00000065613	SLK	2198.46	-0.0193557	0.783912	0.999801
ENSG00000065615	CYB5R4	228.014	0.0291694	0.838848	0.999801
ENSG00000065621	GSTO2	110.165	-0.00982115	0.955013	0.999801
ENSG00000065665	SEC61A2	289.65	-0.0494334	0.667308	0.999801
ENSG00000065717	TLE2	442.173	-0.0892819	0.351706	0.999801
ENSG00000065802	ASB1	1037.2	-0.0337823	0.689587	0.999801
ENSG00000065809	FAM107B	1101.33	0.0579235	0.442628	0.999801
ENSG00000065833	ME1	1506.76	0.00952381	0.895662	0.999801
ENSG00000065883	CDK13	1844.02	-0.0250957	0.771546	0.999801
ENSG00000065911	MTHFD2	4616.24	0.055084	0.20738	0.999801
ENSG00000065923	SLC9A7	1499.04	0.0753292	0.14272	0.999801
ENSG00000065970	FOXJ2	1572.38	-0.0364855	0.480688	0.999801
ENSG00000065978	YBX1	21849.5	0.0336903	0.542982	0.999801
ENSG00000065989	PDE4A	125.841	0.0768537	0.644714	0.999801
ENSG00000066027	PPP2R5A	1089.44	0.131702	0.110274	0.999801
ENSG00000066044	ELAVL1	4963.52	0.00939372	0.793435	0.999801
ENSG00000066084	DIP2B	3001.65	0.0362757	0.37508	0.999801
ENSG00000066117	SMARCD1	1875.36	-0.0171888	0.733495	0.999801
ENSG00000066135	KDM4A	2965.1	0.0561241	0.411801	0.999801
ENSG00000066136	NFYC	1921.47	-0.00157914	0.979932	0.999801
ENSG00000066248	NGEF	224.475	0.0365056	0.748586	0.999801
ENSG00000066279	ASPM	1543.42	-0.0167456	0.924302	0.999801
ENSG00000066322	ELOVL1	3398.44	-0.0212062	0.740489	0.999801
ENSG00000066379	ZNRD1	252.535	0.11583	0.32783	0.999801
ENSG00000066422	ZBTB11	1640.98	0.0404876	0.583103	0.999801
ENSG00000066427	ATXN3	564.789	0.0690465	0.385586	0.999801
ENSG00000066455	GOLGA5	1446.52	-0.0153345	0.770566	0.999801
ENSG00000066557	LRRC40	600.726	0.0242493	0.866133	0.999801
ENSG00000066583	ISOC1	988.745	0.0369867	0.568722	0.999801
ENSG00000066629	EML1	769.559	-0.0929094	0.165962	0.999801
ENSG00000066651	TRMT11	428.172	0.0254466	0.814344	0.999801
ENSG00000066654	THUMPD1	2626.48	-0.128498	0.167968	0.999801
ENSG00000066697	MSANTD3	402.541	0.108297	0.235977	0.999801
ENSG00000066739	ATG2B	1968	-0.0253657	0.749192	0.999801
ENSG00000066777	ARFGEF1	3649.73	-0.0477245	0.573531	0.999801
ENSG00000066827	ZFAT	466.215	-0.0499489	0.525028	0.999801
ENSG00000066855	MTFR1	2020.28	0.0983018	0.0907432	0.999801
ENSG00000066926	FECH	5825.76	-0.0549265	0.233331	0.999801
ENSG00000066933	MYO9A	1617.15	-0.108244	0.165985	0.999801
ENSG00000067048	DDX3Y	1248.62	-0.087115	0.210989	0.999801
ENSG00000067057	PFKP	1743.42	0.0403355	0.634997	0.999801
ENSG00000067064	IDI1	1382.32	-0.00900813	0.91592	0.999801
ENSG00000067066	SP100	128.018	-0.0988749	0.57517	0.999801
ENSG00000067082	KLF6	314.917	-0.0179423	0.862818	0.999801
ENSG00000067113	PLPP1	4244.55	-0.0658006	0.149538	0.999801
ENSG00000067141	NEO1	2668.32	-0.0228334	0.641053	0.999801
ENSG00000067167	TRAM1	1579.07	0.0497228	0.725632	0.999801
ENSG00000067177	PHKA1	692.108	0.014472	0.827218	0.999801
ENSG00000067182	TNFRSF1A	1858.9	0.00570701	0.932055	0.999801
ENSG00000067191	CACNB1	140.003	0.0959352	0.599348	0.999801
ENSG00000067208	EVI5	1174.86	-0.0189412	0.785903	0.999801
ENSG00000067221	STOML1	425.767	0.069978	0.466676	0.999801
ENSG00000067225	PKM	34262.7	0.0297691	0.673673	0.999801
ENSG00000067248	DHX29	1634.05	0.0821965	0.340808	0.999801
ENSG00000067334	DNTTIP2	2551.09	0.0280534	0.670316	0.999801
ENSG00000067365	METTL22	577.197	-0.0246984	0.734505	0.999801
ENSG00000067369	TP53BP1	2525.15	-0.0495539	0.372854	0.999801
ENSG00000067533	RRP15	962.931	-0.0617363	0.294654	0.999801
ENSG00000067560	RHOA	9990.91	0.0479891	0.326852	0.999801
ENSG00000067596	DHX8	2395.94	-0.0126618	0.832381	0.999801
ENSG00000067601	PMS2P4	295.693	0.0442688	0.653402	0.999801
ENSG00000067606	PRKCZ	1070.08	0.056025	0.487171	0.999801
ENSG00000067646	ZFY	468.004	0.0315812	0.751214	0.999801
ENSG00000067704	IARS2	4542.62	0.0220232	0.684698	0.999801
ENSG00000067798	NAV3	1463.45	-0.0434583	0.534652	0.999801
ENSG00000067829	IDH3G	1306.09	0.07803	0.362991	0.999801
ENSG00000067836	ROGDI	1421.69	0.0809362	0.37322	0.999801
ENSG00000067900	ROCK1	2523.08	0.0428152	0.66411	0.999801
ENSG00000067955	CBFB	1587.75	0.000548701	0.994549	0.999801
ENSG00000067992	PDK3	912.64	0.0738169	0.323668	0.999801
ENSG00000068024	HDAC4	629.92	-0.00239699	0.977684	0.999801
ENSG00000068028	RASSF1	391.93	-0.0879403	0.394407	0.999801
ENSG00000068078	FGFR3	235.855	-0.0471245	0.735152	0.999801
ENSG00000068079	IFI35	63.123	0.158609	0.493663	0.999801
ENSG00000068097	HEATR6	1110.06	-0.081971	0.15443	0.999801
ENSG00000068120	COASY	2570.88	-0.0359677	0.56433	0.999801
ENSG00000068137	PLEKHH3	1910.8	0.0916249	0.246404	0.999801
ENSG00000068305	MEF2A	1166.72	0.0950827	0.199543	0.999801
ENSG00000068308	OTUD5	552.699	-0.00171859	0.984937	0.999801
ENSG00000068323	TFE3	523.548	0.0467217	0.582954	0.999801
ENSG00000068354	TBC1D25	112.913	0.143658	0.400732	0.999801
ENSG00000068366	ACSL4	140.364	0.110436	0.442923	0.999801
ENSG00000068394	GPKOW	423.397	0.0411775	0.691169	0.999801
ENSG00000068400	GRIPAP1	557.878	-0.114985	0.701829	0.999801
ENSG00000068438	FTSJ1	759.94	-0.0177947	0.816643	0.999801
ENSG00000068489	PRR11	1977.3	-0.00127446	0.980933	0.999801
ENSG00000068650	ATP11A	1819	0.0653674	0.241148	0.999801
ENSG00000068654	POLR1A	5250.91	-0.0862636	0.324668	0.999801
ENSG00000068697	LAPTM4A	2832.83	0.117891	0.206207	0.999801
ENSG00000068724	TTC7A	195.974	-0.082466	0.466452	0.999801
ENSG00000068745	IP6K2	3679.45	0.0613578	0.17728	0.999801
ENSG00000068784	SRBD1	669.751	-0.018829	0.782499	0.999801
ENSG00000068793	NA	3595.67	-0.00913586	0.810129	0.999801
ENSG00000068796	KIF2A	1458.4	0.0586646	0.436783	0.999801
ENSG00000068878	PSME4	4689.6	-0.0361724	0.595305	0.999801
ENSG00000068885	IFT80	328.097	0.02168	0.862107	0.999801
ENSG00000068903	SIRT2	1573.94	0.0617451	0.354532	0.999801
ENSG00000068912	ERLEC1	754.25	0.0454054	0.68863	0.999801
ENSG00000068976	PYGM	37.5481	-0.0169876	0.950621	0.999801
ENSG00000068985	PAGE1	27.0506	-0.280111	0.345394	0.999801
ENSG00000069020	MAST4	1429.24	0.0815053	0.180441	0.999801
ENSG00000069248	NUP133	2839.23	-0.0196636	0.761534	0.999801
ENSG00000069275	NUCKS1	14017.7	0.0379932	0.604487	0.999801
ENSG00000069329	VPS35	4236.23	0.0327206	0.697265	0.999801
ENSG00000069345	DNAJA2	4201.16	-0.00919559	0.815576	0.999801
ENSG00000069399	BCL3	267.503	0.00546872	0.959625	0.999801
ENSG00000069424	KCNAB2	911.834	0.0927326	0.139317	0.999801
ENSG00000069482	GAL	897.406	0.00783238	0.929393	0.999801
ENSG00000069493	CLEC2D	57.8831	-0.0145198	0.951759	0.999801
ENSG00000069667	RORA	49.6865	0.226205	0.386105	0.999801
ENSG00000069712	NA	180.175	0.0616385	0.686097	0.999801
ENSG00000069849	ATP1B3	6149.31	-0.00896743	0.877264	0.999801
ENSG00000069869	NEDD4	414.774	0.104752	0.299277	0.999801
ENSG00000069943	PIGB	396.079	0.0479836	0.70861	0.999801
ENSG00000069956	MAPK6	4755.1	-0.0784239	0.394292	0.999801
ENSG00000069966	GNB5	471.514	0.027234	0.739627	0.999801
ENSG00000069974	RAB27A	463.128	-0.0406441	0.609456	0.999801
ENSG00000069998	HDHD5	2025.11	0.0508001	0.44911	0.999801
ENSG00000070010	UFD1	2198.97	-0.0105271	0.873533	0.999801
ENSG00000070018	LRP6	2524.76	0.0309208	0.62189	0.999801
ENSG00000070047	PHRF1	1989.44	-0.119015	0.785329	0.999801
ENSG00000070061	ELP1	1384.51	0.0406615	0.492719	0.999801
ENSG00000070087	PFN2	2738.31	0.0842001	0.378114	0.999801
ENSG00000070159	PTPN3	2098.38	-0.0569162	0.202785	0.999801
ENSG00000070269	TMEM260	574.65	0.136759	0.191524	0.999801
ENSG00000070366	SMG6	1531.65	0.0646787	0.547116	0.999801
ENSG00000070367	EXOC5	2351.08	0.100253	0.400852	0.999801
ENSG00000070371	CLTCL1	197.613	0.11061	0.31758	0.999801
ENSG00000070404	FSTL3	163.853	0.0363127	0.808443	0.999801
ENSG00000070413	DGCR2	3257.73	0.00693432	0.922509	0.999801
ENSG00000070423	RNF126	1976.51	-0.0615395	0.398779	0.999801
ENSG00000070444	MNT	1084.59	-0.0451209	0.667721	0.999801
ENSG00000070476	ZXDC	1550.75	-0.0393975	0.532167	0.999801
ENSG00000070501	POLB	651.201	-0.047597	0.546543	0.999801
ENSG00000070601	FRMPD1	281.863	0.0290559	0.798188	0.999801
ENSG00000070610	GBA2	2695.97	0.0340008	0.577349	0.999801
ENSG00000070614	NDST1	6064.16	-0.052808	0.230831	0.999801
ENSG00000070718	AP3M2	1222.21	-0.0239161	0.677381	0.999801
ENSG00000070731	ST6GALNAC2	25.0227	-0.019485	0.956924	0.999801
ENSG00000070756	PABPC1	61890	-0.00948005	0.744663	0.999801
ENSG00000070759	TESK2	310.359	0.162722	0.128125	0.999801
ENSG00000070761	CFAP20	1062	-0.107803	0.172091	0.999801
ENSG00000070770	CSNK2A2	2423.56	-0.020625	0.654497	0.999801
ENSG00000070785	EIF2B3	1013.43	0.0564406	0.378616	0.999801
ENSG00000070814	TCOF1	3183.16	-0.141097	0.593789	0.999801
ENSG00000070831	CDC42	4634.27	0.0544687	0.400819	0.999801
ENSG00000070882	OSBPL3	523.407	-0.0111223	0.890304	0.999801
ENSG00000070950	RAD18	1088.79	-0.0771014	0.45776	0.999801
ENSG00000070961	ATP2B1	5208.23	0.112387	0.159968	0.999801
ENSG00000071051	NCK2	560.5	0.0155809	0.826747	0.999801
ENSG00000071054	MAP4K4	3512.29	-0.00423955	0.97264	0.999801
ENSG00000071073	MGAT4A	180.968	0.199558	0.1562	0.999801
ENSG00000071082	RPL31	16824.9	0.0863943	0.336418	0.999801
ENSG00000071127	WDR1	7298.96	-0.0614837	0.285655	0.999801
ENSG00000071189	SNX13	1478.02	0.0672818	0.531132	0.999801
ENSG00000071205	ARHGAP10	1544.09	0.0274883	0.587924	0.999801
ENSG00000071242	RPS6KA2	1741.17	0.0317412	0.591042	0.999801
ENSG00000071243	ING3	550.888	0.126814	0.141483	0.999801
ENSG00000071246	VASH1	119.646	0.163805	0.449441	0.999801
ENSG00000071462	BUD23	1585.62	0.00275744	0.973665	0.999801
ENSG00000071537	SEL1L	3794.27	-0.0808347	0.174216	0.999801
ENSG00000071539	TRIP13	1863.85	-0.0301044	0.468739	0.999801
ENSG00000071553	ATP6AP1	2105.21	0.0888643	0.124457	0.999801
ENSG00000071564	TCF3	2790.86	0.0252535	0.662651	0.999801
ENSG00000071626	DAZAP1	5546.32	0.0525207	0.35788	0.999801
ENSG00000071655	MBD3	2326.46	-0.0650816	0.800572	0.999801
ENSG00000071794	HLTF	5851.64	0.121838	0.176491	0.999801
ENSG00000071859	FAM50A	1192.52	0.00795089	0.935584	0.999801
ENSG00000071889	FAM3A	577.049	0.036865	0.641994	0.999801
ENSG00000071894	CPSF1	1416.17	-0.0383235	0.661336	0.999801
ENSG00000071994	PDCD2	1746	0.0720135	0.250777	0.999801
ENSG00000072042	RDH11	7056.15	0.0101453	0.817243	0.999801
ENSG00000072062	PRKACA	3268.95	0.0112885	0.832224	0.999801
ENSG00000072071	ADGRL1	7226.55	0.0183392	0.783742	0.999801
ENSG00000072110	ACTN1	3835.26	-0.0125039	0.841859	0.999801
ENSG00000072121	ZFYVE26	1724.53	0.0232538	0.638184	0.999801
ENSG00000072133	RPS6KA6	649.927	0.0341089	0.741114	0.999801
ENSG00000072135	PTPN18	2312.92	-0.0508959	0.342865	0.999801
ENSG00000072210	ALDH3A2	3737.7	0.0773845	0.159611	0.999801
ENSG00000072274	TFRC	23427.1	-0.0467533	0.449979	0.999801
ENSG00000072310	SREBF1	8018.82	0.0733124	0.271677	0.999801
ENSG00000072364	AFF4	8368.74	-0.0318342	0.615346	0.999801
ENSG00000072401	UBE2D1	271.791	-0.0164118	0.903126	0.999801
ENSG00000072415	MPP5	2714.72	-0.0120048	0.87389	0.999801
ENSG00000072501	SMC1A	2371.25	-0.124788	0.714853	0.999801
ENSG00000072506	HSD17B10	2196.09	0.0771439	0.403776	0.999801
ENSG00000072518	MARK2	3033.4	-0.012266	0.795266	0.999801
ENSG00000072571	HMMR	2151.13	0.0762293	0.500515	0.999801
ENSG00000072609	CHFR	785.472	-0.0818416	0.204793	0.999801
ENSG00000072682	P4HA2	512.979	0.0105775	0.898151	0.999801
ENSG00000072736	NFATC3	1565.95	-0.00161476	0.975337	0.999801
ENSG00000072756	TRNT1	1356.11	-0.0368381	0.638375	0.999801
ENSG00000072778	ACADVL	6796.06	0.0166557	0.823784	0.999801
ENSG00000072786	STK10	416.557	0.0481617	0.678351	0.999801
ENSG00000072803	FBXW11	3520.47	-0.00530269	0.894147	0.999801
ENSG00000072840	EVC	1344.52	-0.0154756	0.884881	0.999801
ENSG00000072849	DERL2	1115.98	0.0569575	0.499366	0.999801
ENSG00000072858	SIDT1	53.2902	0.290294	0.158455	0.999801
ENSG00000072864	NDE1	1000.25	-0.00470218	0.945343	0.999801
ENSG00000072954	TMEM38A	207.096	0.019116	0.885551	0.999801
ENSG00000072958	AP1M1	1278.79	0.0274349	0.695084	0.999801
ENSG00000073008	PVR	1364.45	-0.0557465	0.436045	0.999801
ENSG00000073009	NA	70.5019	0.053192	0.814917	0.999801
ENSG00000073050	XRCC1	441.304	-0.00476574	0.960484	0.999801
ENSG00000073060	SCARB1	3922.45	-0.0823997	0.107844	0.999801
ENSG00000073111	MCM2	6740.72	-0.0115883	0.885378	0.999801
ENSG00000073150	PANX2	347.844	0.0687591	0.559905	0.999801
ENSG00000073169	SELENOO	820.183	0.0867144	0.330453	0.999801
ENSG00000073331	ALPK1	176.831	0.136322	0.273037	0.999801
ENSG00000073417	PDE8A	764.71	-0.0324835	0.636169	0.999801
ENSG00000073464	CLCN4	236.201	0.00881424	0.935606	0.999801
ENSG00000073536	NLE1	1765.66	0.0168848	0.777346	0.999801
ENSG00000073578	SDHA	4031.03	-0.00310687	0.96103	0.999801
ENSG00000073584	SMARCE1	2086.64	0.00850495	0.919284	0.999801
ENSG00000073605	GSDMB	223.465	0.00133584	0.993277	0.999801
ENSG00000073614	KDM5A	2216.65	-0.0679312	0.144884	0.999801
ENSG00000073670	ADAM11	211.314	0.102346	0.371504	0.999801
ENSG00000073711	PPP2R3A	517.998	0.0738589	0.37371	0.999801
ENSG00000073712	FERMT2	399.227	0.0789513	0.452329	0.999801
ENSG00000073734	ABCB11	36.4595	0.0102994	0.965928	0.999801
ENSG00000073803	MAP3K13	1965.6	0.0651218	0.323992	0.999801
ENSG00000073849	ST6GAL1	114.245	0.0627608	0.669256	0.999801
ENSG00000073921	PICALM	2818.07	0.00700266	0.939066	0.999801
ENSG00000073969	NSF	2328.9	0.017186	0.758325	0.999801
ENSG00000074054	CLASP1	2746.11	0.0241772	0.592609	0.999801
ENSG00000074071	MRPS34	3081.16	0.0141684	0.883022	0.999801
ENSG00000074181	NOTCH3	1748.62	0.126877	0.210891	0.999801
ENSG00000074201	CLNS1A	2674.51	0.0245333	0.591792	0.999801
ENSG00000074211	PPP2R2C	547.582	0.0472004	0.503406	0.999801
ENSG00000074219	TEAD2	424.388	0.0428473	0.761362	0.999801
ENSG00000074266	EED	664.216	-0.0214446	0.845489	0.999801
ENSG00000074356	NCBP3	1586.94	-0.0229851	0.707537	0.999801
ENSG00000074410	CA12	183.429	0.00116955	0.992822	0.999801
ENSG00000074582	BCS1L	1303.25	0.0167336	0.805415	0.999801
ENSG00000074590	NUAK1	229.573	0.0591296	0.592104	0.999801
ENSG00000074603	DPP8	1599.59	0.0303622	0.723391	0.999801
ENSG00000074621	SLC24A1	390.716	-0.140322	0.228657	0.999801
ENSG00000074657	ZNF532	3221.2	-0.0774021	0.119707	0.999801
ENSG00000074660	SCARF1	31.1641	-0.317585	0.284679	0.999801
ENSG00000074695	LMAN1	4587.33	-0.0601759	0.290825	0.999801
ENSG00000074696	HACD3	5425.76	0.0665468	0.305343	0.999801
ENSG00000074755	ZZEF1	3583.43	-0.0485612	0.288206	0.999801
ENSG00000074800	ENO1	44044.2	0.00547457	0.93588	0.999801
ENSG00000074842	MYDGF	2225.82	-0.00550382	0.955817	0.999801
ENSG00000074855	ANO8	272.442	-0.0506434	0.833323	0.999801
ENSG00000074935	TUBE1	240.778	0.00810497	0.946737	0.999801
ENSG00000074964	ARHGEF10L	287.106	0.133756	0.364718	0.999801
ENSG00000074966	TXK	28.4457	0.179156	0.605829	0.999801
ENSG00000075043	KCNQ2	27.7081	0.180599	0.584599	0.999801
ENSG00000075089	ACTR6	494.33	0.189121	0.413298	0.999801
ENSG00000075131	TIPIN	724.752	0.0771959	0.347856	0.999801
ENSG00000075142	SRI	912.58	0.014331	0.828537	0.999801
ENSG00000075151	EIF4G3	3030.86	-0.0359168	0.510402	0.999801
ENSG00000075188	NUP37	647.323	0.0545795	0.493051	0.999801
ENSG00000075218	GTSE1	1616.83	0.0307287	0.51559	0.999801
ENSG00000075223	SEMA3C	1107.05	-0.00664233	0.92729	0.999801
ENSG00000075234	TTC38	1368.62	-0.027075	0.660275	0.999801
ENSG00000075239	ACAT1	3235.94	0.0511476	0.285961	0.999801
ENSG00000075240	GRAMD4	541.142	0.116979	0.27743	0.999801
ENSG00000075275	CELSR1	2020.46	0.075023	0.528012	0.999801
ENSG00000075290	WNT8B	25.8027	-0.308328	0.278857	0.999801
ENSG00000075292	ZNF638	3441.67	-0.0356663	0.67856	0.999801
ENSG00000075303	SLC25A40	509.899	0.0765813	0.466224	0.999801
ENSG00000075336	TIMM21	1516.81	-0.00253192	0.9654	0.999801
ENSG00000075391	RASAL2	1341.99	0.0527255	0.337308	0.999801
ENSG00000075399	VPS9D1	90.5871	0.177137	0.32081	0.999801
ENSG00000075407	ZNF37A	1814	-0.14051	0.139184	0.999801
ENSG00000075413	MARK3	3222.14	0.00832121	0.852365	0.999801
ENSG00000075415	SLC25A3	15118	0.0368097	0.463989	0.999801
ENSG00000075420	FNDC3B	2862.27	-0.0652595	0.149257	0.999801
ENSG00000075426	FOSL2	1000.07	-0.0719071	0.358953	0.999801
ENSG00000075568	TMEM131	2242.84	-0.0361663	0.611773	0.999801
ENSG00000075618	FSCN1	371.164	0.179307	0.123315	0.999801
ENSG00000075624	ACTB	71677.7	0.0100334	0.829221	0.999801
ENSG00000075643	MOCOS	1750.05	0.00661796	0.892951	0.999801
ENSG00000075651	PLD1	38.0359	0.363333	0.213272	0.999801
ENSG00000075702	WDR62	1096.7	-0.000967872	0.987218	0.999801
ENSG00000075711	DLG1	3119.69	-0.00843186	0.902254	0.999801
ENSG00000075785	RAB7A	5348.65	0.0216961	0.64006	0.999801
ENSG00000075790	BCAP29	776.169	0.0622876	0.641269	0.999801
ENSG00000075826	SEC31B	84.0959	0.00811457	0.969134	0.999801
ENSG00000075856	SART3	2518.02	-0.0638614	0.563941	0.999801
ENSG00000075914	EXOSC7	1313.36	-0.0730639	0.242358	0.999801
ENSG00000075945	KIFAP3	615.647	0.123012	0.208446	0.999801
ENSG00000075975	MKRN2	779.447	0.0761036	0.261478	0.999801
ENSG00000076003	MCM6	3627.86	-0.0426536	0.396604	0.999801
ENSG00000076043	REXO2	729.093	0.0493278	0.565215	0.999801
ENSG00000076053	RBM7	305.64	0.0426159	0.698476	0.999801
ENSG00000076067	RBMS2	426.815	-0.0361913	0.669696	0.999801
ENSG00000076108	BAZ2A	4783.26	-0.0668034	0.229463	0.999801
ENSG00000076201	PTPN23	1709.61	-0.0314438	0.685947	0.999801
ENSG00000076242	MLH1	2565.2	-0.0439522	0.388153	0.999801
ENSG00000076248	UNG	2214.27	-0.00389415	0.934597	0.999801
ENSG00000076258	FMO4	46.5557	0.11419	0.690209	0.999801
[truncated: 55,861 more rows]

## Sheet: 24h_EPI001_2p5uM_vsDMSO
GeneID	Gene	baseMean	log2FoldChange	pvalue	padj
ENSG00000096060	FKBP5	3471.3	-0.262291	8.1824e-05	1
ENSG00000163492	CCDC141	217.154	-0.522616	0.000116365	1
ENSG00000135862	LAMC1	9983.69	-0.128783	0.000157289	1
ENSG00000155657	TTN	763.523	-0.538352	0.000311263	1
ENSG00000169122	FAM110B	1453.78	-0.148059	0.000416491	1
ENSG00000182795	C1orf116	6975.32	-0.124281	0.000665182	1
ENSG00000116574	RHOU	1564.41	-0.175325	0.000722763	1
ENSG00000104419	NDRG1	2398.85	-0.186076	0.000792462	1
ENSG00000243081	AC092894.1	99.6	0.642052	0.000818319	1
ENSG00000124225	PMEPA1	4172.04	-0.17678	0.000906458	1
ENSG00000103222	ABCC1	6084.64	-0.159784	0.00114457	1
ENSG00000140443	IGF1R	6656.11	-0.196401	0.00116072	1
ENSG00000259967	AC087761.1	11.1722	-1.82396	0.00137422	1
ENSG00000171962	DRC3	198.672	-0.374116	0.00165019	1
ENSG00000123983	ACSL3	6158.63	-0.165529	0.00193051	1
ENSG00000106049	HIBADH	1836	0.154296	0.00198577	1
ENSG00000133065	SLC41A1	2779.8	-0.148817	0.00218832	1
ENSG00000176945	MUC20	103.786	-0.562404	0.00235993	1
ENSG00000146592	CREB5	13.2107	1.70197	0.0023787	1
ENSG00000188199	NUTM2B	6.56823	2.17982	0.00244809	1
ENSG00000101384	JAG1	2202.2	-0.138516	0.00268269	1
ENSG00000272836	AL022328.1	12.9096	1.35564	0.00352258	1
ENSG00000106070	GRB10	19411.5	0.116656	0.0041004	1
ENSG00000117643	MAN1C1	132.545	-0.444724	0.00419878	1
ENSG00000154144	TBRG1	3999.7	-0.120074	0.00428583	1
ENSG00000120907	ADRA1A	65.1879	0.632993	0.00453966	1
ENSG00000147408	CSGALNACT1	101.598	-0.459303	0.00458357	1
ENSG00000269303	AC020907.3	5.18955	2.69328	0.00470036	1
ENSG00000184500	PROS1	50.5672	0.665682	0.00479029	1
ENSG00000252892	RNU6-548P	2.37397	-4.38845	0.00483795	1
ENSG00000068971	PPP2R5B	466.503	0.268761	0.00488901	1
ENSG00000125266	EFNB2	1148.79	-0.172145	0.00501619	1
ENSG00000168209	DDIT4	3958.04	0.178777	0.00515552	1
ENSG00000203499	IQANK1	248.601	-0.296053	0.00517618	1
ENSG00000272123	AC008966.2	1.98903	4.00665	0.00522844	1
ENSG00000087076	HSD17B14	26.2564	0.992882	0.00528094	1
ENSG00000187823	RTL4	3.36075	2.92887	0.00531284	1
ENSG00000143387	CTSK	96.7487	-0.535526	0.00551199	1
ENSG00000135226	UGT2B28	35.7057	-0.672717	0.00556297	1
ENSG00000151025	GPR158	3940.1	-0.122577	0.00632197	1
ENSG00000154734	ADAMTS1	14561.8	-0.0950747	0.00640858	1
ENSG00000178573	MAF	198.414	-0.295358	0.0068095	1
ENSG00000242620	NA	2.04745	-4.503	0.00687762	1
ENSG00000258477	PPIAP6	3.90159	2.72732	0.00693121	1
ENSG00000095739	BAMBI	608.753	0.226333	0.00710797	1
ENSG00000129474	AJUBA	1076.55	0.216607	0.00714528	1
ENSG00000130475	FCHO1	19.6264	1.03006	0.00748608	1
ENSG00000167034	NKX3-1	13334.4	-0.124025	0.00787263	1
ENSG00000244198	AC004889.1	36.7563	-0.693313	0.00793325	1
ENSG00000166446	CDYL2	1757.98	-0.134158	0.00816852	1
ENSG00000144476	ACKR3	2098.74	0.164383	0.00825202	1
ENSG00000189409	MMP23B	2.2597	-3.97556	0.00836218	1
ENSG00000226363	HAGLROS	1.86732	-4.21479	0.00861548	1
ENSG00000070526	ST6GALNAC1	1544.12	-0.20031	0.00862217	1
ENSG00000136783	NIPSNAP3A	1414.91	0.209003	0.00863331	1
ENSG00000184923	NUTM2A	2.44238	3.46315	0.00870724	1
ENSG00000214814	FER1L6	23.7581	-0.956599	0.00879943	1
ENSG00000165029	ABCA1	106.722	0.50892	0.00881602	1
ENSG00000206190	ATP10A	557.427	-0.183307	0.00898256	1
ENSG00000234801	MORF4	4.75398	2.06747	0.0092821	1
ENSG00000156113	KCNMA1	3148.81	-0.122655	0.00953953	1
ENSG00000200571	RNU6-1284P	1.43857	-3.90841	0.00988612	1
ENSG00000101282	RSPO4	2.7211	4.21566	0.00999907	1
ENSG00000219806	ATP5PBP6	1.26109	4.12351	0.0100439	1
ENSG00000131781	FMO5	9.17037	-1.43529	0.0103604	1
ENSG00000206557	TRIM71	2.21259	3.82952	0.0106164	1
ENSG00000259087	AL121790.2	21.4362	0.958243	0.010761	1
ENSG00000196756	SNHG17	1477.53	-0.129081	0.0109636	1
ENSG00000163131	CTSS	2.37276	3.89535	0.0109713	1
ENSG00000179094	PER1	784.347	-0.197493	0.0112603	1
ENSG00000200075	RF00402	1.97123	-3.84476	0.0113549	1
ENSG00000188483	IER5L	193.436	0.422991	0.0114573	1
ENSG00000240303	ACAD11	49.7348	-0.664529	0.0117635	1
ENSG00000143919	CAMKMT	124.215	-0.41531	0.0119954	1
ENSG00000154122	ANKH	3082.32	-0.102696	0.0122415	1
ENSG00000251141	MRPS30-DT	9.38494	1.24041	0.0122611	1
ENSG00000187642	PERM1	15.9639	1.1155	0.0123091	1
ENSG00000156265	MAP3K7CL	2.01615	-3.84575	0.012508	1
ENSG00000139714	MORN3	23.2366	-0.898081	0.0127895	1
ENSG00000254480	AC015689.1	3.30021	-2.98803	0.0129055	1
ENSG00000206975	RNU6-13P	1.35868	3.84072	0.0131358	1
ENSG00000100890	KIAA0391	31.2121	-0.651478	0.0131493	1
ENSG00000185189	NRBP2	75.417	-0.509973	0.0134327	1
ENSG00000272735	AC007881.3	20.9557	0.812776	0.0137677	1
ENSG00000236404	VLDLR-AS1	74.2253	0.519356	0.0141317	1
ENSG00000259279	NA	49.1021	0.582152	0.0141871	1
ENSG00000264358	MIR3122	2.44235	-3.03484	0.0142026	1
ENSG00000184523	PTGER4P2	1.61341	-3.69505	0.0146125	1
ENSG00000219149	PPIAP87	4.86181	-1.68896	0.0148207	1
ENSG00000105889	STEAP1B	13.3638	-0.99656	0.0148406	1
ENSG00000257702	LBX2-AS1	3.92294	-2.54462	0.0149345	1
ENSG00000143630	HCN3	13.1728	1.19807	0.015014	1
ENSG00000187741	FANCA	1279.36	-0.135234	0.0150426	1
ENSG00000244485	RPL18P13	2.80852	3.1438	0.0151865	1
ENSG00000218336	TENM3	2.94123	3.58785	0.0155413	1
ENSG00000002834	LASP1	3086.24	0.126414	0.0156509	1
ENSG00000198734	F5	292.54	-0.285331	0.0156553	1
ENSG00000272660	AC090425.1	4.67019	2.07839	0.0156918	1
ENSG00000204381	LAYN	1.5014	3.69973	0.0157209	1
ENSG00000228550	AC073583.1	2.87185	2.41693	0.0157929	1
ENSG00000141294	LRRC46	53.6022	-0.485631	0.0158233	1
ENSG00000173511	VEGFB	66.7881	0.492344	0.0164229	1
ENSG00000272941	AC083862.2	39.3262	-0.783113	0.0167388	1
ENSG00000214578	HMGN2P15	1.6441	-3.50536	0.0167739	1
ENSG00000253946	AC008489.1	1.9703	-3.70108	0.0168521	1
ENSG00000113319	RASGRF2	8.60945	1.35067	0.0168715	1
ENSG00000202150	RNU6-407P	4.62533	-2.0127	0.0169099	1
ENSG00000101680	LAMA1	164.48	-0.283101	0.0170539	1
ENSG00000270604	HCG17	1.21435	3.92576	0.0172832	1
ENSG00000151503	NCAPD3	5598.82	-0.0881658	0.0175253	1
ENSG00000225883	BMS1P11	5.05086	1.86342	0.0175779	1
ENSG00000249693	THEGL	3.51036	2.54241	0.0177161	1
ENSG00000140090	SLC24A4	1.36026	3.76117	0.0177405	1
ENSG00000169855	ROBO1	1135.72	0.136545	0.0178127	1
ENSG00000259707	AC105339.4	1.63504	-3.04884	0.0178628	1
ENSG00000207523	SNORA66	29.3078	-0.633941	0.0180613	1
ENSG00000133398	MED10	449.62	0.210407	0.0180636	1
ENSG00000125787	GNRH2	20.3521	-0.849305	0.0181277	1
ENSG00000224259	LINC01133	189.583	0.387921	0.0183505	1
ENSG00000227285	NA	9.66229	-1.32539	0.0183567	1
ENSG00000163110	PDLIM5	4298.44	-0.0798593	0.018383	1
ENSG00000238117	AP000844.2	7.74138	1.96783	0.0184305	1
ENSG00000229235	RPL37P18	14.466	0.996908	0.0185169	1
ENSG00000174527	MYO1H	3.88178	-2.4272	0.0185393	1
ENSG00000229585	RPL21P44	3.62561	-2.46569	0.0187549	1
ENSG00000188883	KLRG2	65.9795	0.449419	0.018814	1
ENSG00000259948	AC124068.1	18.1398	-0.932432	0.0190558	1
ENSG00000150687	PRSS23	65.6034	0.569613	0.0191108	1
ENSG00000155016	CYP2U1	645.22	-0.184927	0.0192777	1
ENSG00000253816	AC138866.1	2.37522	3.06613	0.0193389	1
ENSG00000196459	TRAPPC2	350.076	-0.215864	0.0193847	1
ENSG00000238000	AC116347.1	16.6457	0.973955	0.0194615	1
ENSG00000043039	BARX2	7.54672	1.51033	0.0199389	1
ENSG00000112276	BVES	73.3615	0.457423	0.0200676	1
ENSG00000260824	NA	20.4374	0.873288	0.0204095	1
ENSG00000097096	SYDE2	54.2508	-0.553956	0.0204301	1
ENSG00000120903	CHRNA2	879.96	-0.202608	0.0208437	1
ENSG00000105997	HOXA3	12.2708	-1.005	0.0209201	1
ENSG00000013588	GPRC5A	2.17888	3.45377	0.0209627	1
ENSG00000225300	AL591623.1	27.8238	-0.724283	0.0212343	1
ENSG00000238165	AC007560.1	1.62605	3.66478	0.0213101	1
ENSG00000182158	CREB3L2	2760.91	-0.089228	0.0213344	1
ENSG00000228050	TOP3BP1	2.61922	-2.89662	0.0215191	1
ENSG00000215788	TNFRSF25	17.609	-1.16774	0.0215861	1
ENSG00000200867	RN7SKP36	2.41359	-3.3839	0.0216483	1
ENSG00000231918	AC007402.1	32.6381	0.700794	0.0216563	1
ENSG00000137767	SQOR	134.427	0.416475	0.0218258	1
ENSG00000263511	MIR5699	3.05605	2.85467	0.0218298	1
ENSG00000236137	AL445231.1	23.6332	-0.683856	0.0218787	1
ENSG00000212766	EWSAT1	1.25292	-4.184	0.0219033	1
ENSG00000196154	S100A4	10.8682	1.0871	0.0221034	1
ENSG00000202415	RN7SKP269	19.4473	-0.806313	0.0223441	1
ENSG00000262160	AC020978.5	706.155	-0.16314	0.0224592	1
ENSG00000144481	TRPM8	1022.72	-0.156045	0.022499	1
ENSG00000171817	ZNF540	76.6682	0.403409	0.0227545	1
ENSG00000185739	SRL	2.36605	-2.97069	0.0228899	1
ENSG00000116133	DHCR24	24603.5	-0.110835	0.0230705	1
ENSG00000233785	AC131011.1	4.89838	-1.67673	0.0231788	1
ENSG00000270996	AC005034.4	4.56322	-1.88442	0.0232405	1
ENSG00000145041	DCAF1	1058.55	-0.117663	0.0233038	1
ENSG00000135248	FAM71F1	15.7109	-0.953098	0.0233844	1
ENSG00000062598	ELMO2	1299.74	-0.128699	0.0234404	1
ENSG00000255098	NA	4.02481	-2.39819	0.0234727	1
ENSG00000248590	GLDCP1	2.65449	3.37578	0.0237172	1
ENSG00000156453	PCDH1	835.075	-0.164239	0.0238068	1
ENSG00000257194	AC126178.1	1.73819	3.64013	0.0238663	1
ENSG00000272420	AL513477.2	11.008	-1.15042	0.0238718	1
ENSG00000162645	GBP2	43.9197	0.588598	0.0239536	1
ENSG00000229785	SLC25A38P1	1.1468	-3.54414	0.0240083	1
ENSG00000171365	CLCN5	152.457	0.292054	0.024058	1
ENSG00000272745	AC004948.1	1.22717	3.54096	0.0243534	1
ENSG00000185634	SHC4	56.7347	0.523066	0.0245072	1
ENSG00000100003	SEC14L2	327.612	-0.205088	0.0249208	1
ENSG00000174306	ZHX3	2232.02	-0.103526	0.0249478	1
ENSG00000174132	FAM174A	456.104	0.204773	0.0250873	1
ENSG00000243711	RPL21P116	1.08293	-3.66586	0.0252151	1
ENSG00000166323	C11orf65	63.2041	-0.521206	0.0254769	1
ENSG00000213036	AL445305.1	3.18213	-2.66844	0.0255056	1
ENSG00000025423	HSD17B6	25.692	-0.614557	0.0255932	1
ENSG00000200428	RF00019	2.17918	3.63831	0.0258263	1
ENSG00000259520	AC051619.5	9.40255	1.23849	0.0258812	1
ENSG00000049759	NEDD4L	7906.02	-0.0796764	0.0259582	1
ENSG00000252670	NA	3.27734	-2.54359	0.0260385	1
ENSG00000090530	P3H2	125.218	-0.34227	0.0261065	1
ENSG00000202358	RNU6-652P	4.10061	-2.60791	0.0261834	1
ENSG00000217239	AL136968.2	2.20988	-3.14575	0.0261842	1
ENSG00000230305	AC004980.3	11.4432	-1.1481	0.0262865	1
ENSG00000223959	AFG3L1P	507.091	-0.16874	0.0262928	1
ENSG00000129535	NRL	45.4931	-0.569171	0.0263533	1
ENSG00000257489	AC010203.1	25.0579	-0.742189	0.02642	1
ENSG00000136155	SCEL	7.22005	-1.75521	0.026507	1
ENSG00000215158	AC138409.2	545.114	0.260214	0.0265855	1
ENSG00000258744	AL132800.1	19.5244	-0.894307	0.0268024	1
ENSG00000236358	AL355472.3	7.84381	1.22427	0.02686	1
ENSG00000162669	HFM1	4.59802	1.97779	0.0269661	1
ENSG00000241112	RPL29P14	57.7701	-0.491512	0.0269852	1
ENSG00000164300	SERINC5	3050.93	-0.0973332	0.0272891	1
ENSG00000254522	AP001767.1	4.03433	-2.18423	0.0275236	1
ENSG00000163106	HPGDS	1.02512	-3.6507	0.0275511	1
ENSG00000118985	ELL2	3594.42	-0.133184	0.0275868	1
ENSG00000177752	YIPF7	0.949314	3.9896	0.0276026	1
ENSG00000204779	FOXD4L5	4.17706	-2.03525	0.0277276	1
ENSG00000263473	NA	0.984615	3.94517	0.0277633	1
ENSG00000263427	AC129492.2	30.1581	0.56509	0.0277639	1
ENSG00000188372	ZP3	553.606	0.190598	0.0278862	1
ENSG00000122735	DNAI1	3.83612	1.95686	0.0279252	1
ENSG00000233452	STXBP5-AS1	11.446	-1.12828	0.0279294	1
ENSG00000264961	MIR4730	1.84285	-3.83993	0.0279299	1
ENSG00000246820	AC091013.1	2.09951	-3.30211	0.0279782	1
ENSG00000186234	FAM86MP	1.13324	3.88532	0.0280759	1
ENSG00000221531	NA	4.02626	-2.11773	0.0281986	1
ENSG00000239264	TXNDC5	57.6712	-0.437092	0.0283487	1
ENSG00000070669	ASNS	5194.02	0.13108	0.0283861	1
ENSG00000182319	NA	475.25	-0.205211	0.0284498	1
ENSG00000148225	WDR31	412.066	0.172592	0.0285239	1
ENSG00000228696	ARL17B	5.08575	-1.54136	0.0288791	1
ENSG00000267688	KF456478.1	3.97292	-2.64579	0.029023	1
ENSG00000198793	MTOR	5461.83	-0.102389	0.0290789	1
ENSG00000230936	AC073347.1	1.41418	-3.82829	0.0291179	1
ENSG00000145685	LHFPL2	220.998	0.248451	0.0293269	1
ENSG00000039139	DNAH5	645.23	-0.181769	0.0293633	1
ENSG00000239521	CASTOR3	165.438	-0.306746	0.0294245	1
ENSG00000252965	RF00019	2.06895	3.17408	0.0298652	1
ENSG00000095464	PDE6C	2.90009	2.39378	0.0300313	1
ENSG00000141428	C18orf21	406.651	0.185324	0.0303132	1
ENSG00000167552	TUBA1A	1389.09	0.176346	0.0303639	1
ENSG00000166313	APBB1	432.136	0.210511	0.0303839	1
ENSG00000163171	CDC42EP3	1451.33	-0.128961	0.0303996	1
ENSG00000146856	AGBL3	150.777	0.289331	0.0304654	1
ENSG00000138029	HADHB	2685.82	0.0952323	0.0305348	1
ENSG00000108771	DHX58	23.4967	-0.741561	0.0307905	1
ENSG00000102606	ARHGEF7	1434.92	-0.119507	0.0308283	1
ENSG00000065882	TBC1D1	3072.95	-0.091923	0.0308822	1
ENSG00000213212	NCLP1	1.85117	2.48231	0.0309469	1
ENSG00000111452	ADGRD1	59.5866	-0.489583	0.0310509	1
ENSG00000186842	LINC00846	4.01911	-3.04686	0.031073	1
ENSG00000129195	PIMREG	1311.53	0.133521	0.0312244	1
ENSG00000184863	RBM33	2134.09	-0.102276	0.0313495	1
ENSG00000243498	UBA52P5	1.00307	-3.56243	0.0316513	1
ENSG00000128908	INO80	1913.92	-0.096087	0.0317475	1
ENSG00000180626	ZNF594	17.4998	0.812824	0.0317619	1
ENSG00000261317	NA	5.50064	-1.63873	0.0318426	1
ENSG00000119227	PIGZ	54.7809	0.538951	0.031893	1
ENSG00000144048	DUSP11	277.539	0.203544	0.0319697	1
ENSG00000260111	AC012184.1	8.60916	-1.26848	0.0322125	1
ENSG00000169026	SLC49A3	72.8295	-0.36493	0.0322625	1
ENSG00000260911	AC135050.3	2.18651	-3.08825	0.0322663	1
ENSG00000144331	ZNF385B	1478.53	-0.101452	0.0325465	1
ENSG00000112305	SMAP1	343.444	0.201805	0.0326694	1
ENSG00000258605	DYNLL1P2	1.52231	3.51013	0.0327585	1
ENSG00000166432	ZMAT1	33.8341	0.6944	0.0328638	1
ENSG00000086205	FOLH1	26361	0.0932175	0.0331386	1
ENSG00000254966	AC103974.1	9.21081	1.77133	0.0331902	1
ENSG00000156504	FAM122B	1018.07	-0.17667	0.0333108	1
ENSG00000004866	ST7	5385.01	0.0971519	0.0333308	1
ENSG00000071282	LMCD1	2.85043	2.35344	0.0333348	1
ENSG00000261349	AL031432.2	6.73438	-1.44223	0.0334081	1
ENSG00000126603	GLIS2	441.625	0.233386	0.0335502	1
ENSG00000229835	KHSRPP1	3.17211	-1.93629	0.0336583	1
ENSG00000171443	ZNF524	296.573	0.243898	0.0336717	1
ENSG00000069966	GNB5	471.514	0.171707	0.0337552	1
ENSG00000166246	C16orf71	68.5795	0.442414	0.0338474	1
ENSG00000205542	TMSB4X	75.6731	0.460208	0.0340715	1
ENSG00000252451	RNA5SP168	4.86608	-1.65784	0.0342121	1
ENSG00000228097	MTATP6P11	8.19665	1.3488	0.034379	1
ENSG00000184922	FMNL1	7.32175	1.51256	0.0344342	1
ENSG00000127585	FBXL16	817.608	0.17825	0.0344924	1
ENSG00000272003	NA	72.1617	-0.396725	0.0345427	1
ENSG00000177917	ARL6IP6	371.44	0.159859	0.0348702	1
ENSG00000227742	CALR4P	7.92594	-1.17586	0.0350135	1
ENSG00000228703	AL355310.2	1.18558	-3.64313	0.0351094	1
ENSG00000272720	AL022322.1	29.0256	-0.867629	0.0351158	1
ENSG00000175505	CLCF1	9.54511	-1.33108	0.035186	1
ENSG00000170271	FAXDC2	394.815	-0.191181	0.03538	1
ENSG00000205281	NA	2.0334	-3.52646	0.0354917	1
ENSG00000228925	AC016722.2	1.7095	-3.33283	0.0357113	1
ENSG00000187398	LUZP2	2254.06	0.129634	0.0358638	1
ENSG00000229751	AC044781.1	2.05029	-3.49081	0.0360411	1
ENSG00000162009	SSTR5	141.373	0.392792	0.0360588	1
ENSG00000263853	NA	1.33584	-3.28095	0.0360929	1
ENSG00000163075	CFAP221	38.981	-0.542021	0.0360942	1
ENSG00000116062	MSH6	2728.51	-0.0803269	0.0361643	1
ENSG00000228439	TSTD3	108.647	-0.319847	0.0362221	1
ENSG00000247877	AC021086.1	16.5254	0.838427	0.0365263	1
ENSG00000167751	KLK2	5507.81	-0.134334	0.0366117	1
ENSG00000207863	MIR125B2	24.7482	0.757061	0.036635	1
ENSG00000110090	CPT1A	7632.47	-0.102995	0.0368061	1
ENSG00000225294	OSTCP2	1.11032	-3.80917	0.0368165	1
ENSG00000204256	BRD2	4486.6	-0.0656756	0.036983	1
ENSG00000162174	ASRGL1	1187.28	-0.152854	0.0371647	1
ENSG00000155749	ALS2CR12	20.7713	-0.78505	0.0371715	1
ENSG00000148606	POLR3A	3381.4	-0.0702033	0.0372566	1
ENSG00000197191	CYSRT1	114.811	0.319871	0.037295	1
ENSG00000267082	AC011472.1	9.39158	1.14261	0.0373561	1
ENSG00000214922	HLA-F-AS1	1.90506	3.27009	0.0373837	1
ENSG00000164379	FOXQ1	10.5088	1.16054	0.0374326	1
ENSG00000101311	FERMT1	689.389	-0.129131	0.0374408	1
ENSG00000114656	KIAA1257	168.739	0.262078	0.0375296	1
ENSG00000266939	NA	1.32884	3.5113	0.0378398	1
ENSG00000249877	AC105924.1	2.71831	2.48788	0.0378426	1
ENSG00000257303	AC073896.2	37.1062	-0.525243	0.0379434	1
ENSG00000272655	POLR2J4	76.052	0.366099	0.0380369	1
ENSG00000225447	RPS15AP10	29.0119	-0.704316	0.038234	1
ENSG00000153233	PTPRR	35.5125	0.660261	0.0383961	1
ENSG00000236670	KRT18P5	15.4156	-0.943226	0.0384702	1
ENSG00000144233	AMMECR1L	1042.13	-0.121126	0.0384715	1
ENSG00000132437	DDC	3642.51	0.114295	0.0385249	1
ENSG00000177181	RIMKLA	850.596	0.131709	0.038634	1
ENSG00000132142	NA	15508.9	-0.0964093	0.0386928	1
ENSG00000198205	ZXDA	224.836	-0.234327	0.03878	1
ENSG00000111490	TBC1D30	2219.93	-0.0972257	0.038833	1
ENSG00000143632	ACTA1	4.98554	-1.29669	0.0388382	1
ENSG00000123836	PFKFB2	1498.14	-0.104381	0.038859	1
ENSG00000197852	INKA2	472.522	-0.197291	0.0391902	1
ENSG00000139668	WDFY2	411.685	-0.172788	0.0393588	1
ENSG00000134240	HMGCS2	603.217	-0.186577	0.0395431	1
ENSG00000073910	FRY	1194.23	-0.141279	0.0396985	1
ENSG00000065308	TRAM2	621.043	-0.14339	0.0397167	1
ENSG00000259976	AC093010.3	17.224	-0.96404	0.0397312	1
ENSG00000172888	ZNF621	1326.59	-0.113165	0.0398936	1
ENSG00000182459	TEX19	23.854	-0.721233	0.0401806	1
ENSG00000201882	RF00493	35.6412	0.613736	0.0403234	1
ENSG00000269997	AC068790.3	25.7395	0.744316	0.0404378	1
ENSG00000134297	PLEKHA8P1	125.197	0.301314	0.0404822	1
ENSG00000204642	HLA-F	13.4728	-0.986021	0.0405026	1
ENSG00000252157	RNU6-479P	1.63454	-3.1821	0.0406224	1
ENSG00000249996	AC106786.2	2.68092	2.60228	0.0407656	1
ENSG00000138079	SLC3A1	1.51117	-3.46068	0.0407721	1
ENSG00000141664	ZCCHC2	1929.51	-0.104343	0.0410639	1
ENSG00000145284	SCD5	373.382	0.19663	0.041069	1
ENSG00000204128	C2orf72	202.984	-0.286971	0.0410909	1
ENSG00000251192	ZNF674	240.433	0.242213	0.0413765	1
ENSG00000242814	AC113398.1	7.68123	-1.28711	0.0413851	1
ENSG00000229808	AL391825.1	15.9126	0.892334	0.0414982	1
ENSG00000163631	ALB	178.349	0.290674	0.0415626	1
ENSG00000254400	AC091564.2	3.97662	-1.8605	0.0416365	1
ENSG00000239087	NA	1.47261	3.42001	0.0416626	1
ENSG00000259118	AL139022.1	6.43194	-1.4478	0.0417154	1
ENSG00000231187	AL356056.2	2.82499	2.87846	0.042138	1
ENSG00000264329	NA	3.29836	2.30512	0.0422449	1
ENSG00000156639	ZFAND3	2123.56	-0.0946024	0.0422877	1
ENSG00000118707	TGIF2	640.483	0.15786	0.0426356	1
ENSG00000225470	JPX	584.241	0.158352	0.0426859	1
ENSG00000254812	AC067930.3	20.5948	-0.696075	0.0427267	1
ENSG00000150773	PIH1D2	34.7063	0.576633	0.0428232	1
ENSG00000254974	AP001372.4	1.95221	-2.69923	0.0429292	1
ENSG00000105755	ETHE1	347.398	0.220967	0.0430179	1
ENSG00000155008	APOOL	504.876	0.15558	0.0433525	1
ENSG00000248946	MTND3P22	1.03587	3.15807	0.0433919	1
ENSG00000258412	AL355102.1	2.1465	-3.05148	0.0434084	1
ENSG00000136856	SLC2A8	539.966	0.182987	0.0434432	1
ENSG00000214559	AC019077.1	2.66567	-2.46619	0.0435227	1
ENSG00000134765	DSC1	97.2719	-0.302512	0.0435966	1
ENSG00000168303	MPLKIP	838.059	0.16467	0.0436416	1
ENSG00000229422	AL512625.2	14.9711	0.856555	0.0436542	1
ENSG00000112561	TFEB	187.745	-0.251561	0.043707	1
ENSG00000168826	ZBTB49	187.259	-0.227132	0.0437285	1
ENSG00000271151	AC016737.1	35.8865	0.544801	0.0437743	1
ENSG00000166292	TMEM100	40.4651	-0.619981	0.0437864	1
ENSG00000132170	PPARG	67.0092	0.402257	0.0439547	1
ENSG00000267350	NA	602.505	-0.134124	0.0440417	1
ENSG00000229323	DLEU1-AS1	0.924707	3.66085	0.0440451	1
ENSG00000139209	SLC38A4	42.6983	-0.438892	0.044093	1
ENSG00000126778	SIX1	159.195	-0.232422	0.0441066	1
ENSG00000122970	IFT81	529.224	0.226945	0.0442013	1
ENSG00000260114	NA	118.397	-0.351144	0.0442872	1
ENSG00000163536	SERPINI1	247.186	0.249618	0.0443612	1
ENSG00000148734	NPFFR1	1.14038	3.60067	0.0444572	1
ENSG00000123908	AGO2	3154.11	-0.0974661	0.0445282	1
ENSG00000177791	MYOZ1	3.4739	-2.10122	0.0445328	1
ENSG00000241229	RN7SL443P	1.11989	-3.26408	0.044561	1
ENSG00000240964	RN7SL751P	5.99358	1.39974	0.0446992	1
ENSG00000243101	RPS3P7	2.41594	3.11445	0.0447226	1
ENSG00000145569	OTULINL	789.291	-0.157563	0.0447372	1
ENSG00000196367	TRRAP	5721.51	-0.0968424	0.0447431	1
ENSG00000138175	ARL3	897.562	0.158727	0.0447592	1
ENSG00000271207	MTCO1P22	5.19942	-1.45961	0.0447772	1
ENSG00000009830	POMT2	736.125	-0.145464	0.0448625	1
ENSG00000224616	RTCA-AS1	110.931	0.312642	0.0448911	1
ENSG00000259415	AC012291.1	8.53172	-1.13464	0.0449453	1
ENSG00000266345	NA	5.2062	-1.46909	0.045035	1
ENSG00000262951	NA	5.84721	-1.45338	0.0451243	1
ENSG00000272750	AL592148.3	26.5236	0.730196	0.0452657	1
ENSG00000268171	NA	1.83689	-3.19927	0.0452855	1
ENSG00000154269	ENPP3	36.5315	0.528961	0.0454248	1
ENSG00000157322	CLEC18A	5.99583	-1.55867	0.0455231	1
ENSG00000264585	MIR4449	8.27037	-1.22181	0.0456306	1
ENSG00000170122	FOXD4	252.114	-0.203337	0.0456353	1
ENSG00000198648	STK39	3850.22	-0.0739714	0.0456539	1
ENSG00000185420	SMYD3	692.37	0.147092	0.0457097	1
ENSG00000213185	FAM24B	24.0685	-0.617999	0.0457537	1
ENSG00000204584	FLJ45513	54.3781	-0.531454	0.0458903	1
ENSG00000267064	UXT-AS1	33.242	0.537375	0.0459184	1
ENSG00000092377	TBL1Y	84.3792	0.358479	0.0459603	1
ENSG00000008513	ST3GAL1	29874.2	0.0663301	0.0461444	1
ENSG00000272834	AL022238.3	2.08087	-2.9448	0.0461779	1
ENSG00000153404	PLEKHG4B	2.46163	-2.6716	0.046303	1
ENSG00000225087	AL583808.1	9.63905	1.25965	0.0463728	1
ENSG00000135596	MICAL1	535.908	-0.208735	0.04644	1
ENSG00000267306	NA	3.46922	1.97614	0.0465564	1
ENSG00000138964	PARVG	12.269	0.937025	0.0466573	1
ENSG00000258646	AL049780.1	13.2832	0.834871	0.0467292	1
ENSG00000227373	AL121983.2	4.47963	1.54608	0.0468658	1
ENSG00000105339	DENND3	141.127	0.310629	0.0469199	1
ENSG00000159140	SON	15762.1	-0.0651624	0.0470346	1
ENSG00000263895	AC100778.1	3.88979	-1.43923	0.0471113	1
ENSG00000103740	ACSBG1	18.116	-0.659576	0.0472113	1
ENSG00000261115	TMEM178B	22.5147	-0.709822	0.0473023	1
ENSG00000234869	AL021392.1	7.48254	1.30028	0.0473974	1
ENSG00000144061	NPHP1	172.71	0.26416	0.0475748	1
ENSG00000059378	PARP12	630.003	0.147125	0.0475766	1
ENSG00000118514	ALDH8A1	7.94881	1.3189	0.0479825	1
ENSG00000242229	RPS3AP14	0.79583	-3.95843	0.0481312	1
ENSG00000149541	B3GAT3	1125.09	0.158962	0.0481402	1
ENSG00000257951	AC126177.6	5.57479	1.66958	0.0481493	1
ENSG00000140416	TPM1	2557.91	-0.0767696	0.0481625	1
ENSG00000204344	STK19	99.1912	0.311989	0.0481963	1
ENSG00000230202	AL450405.1	149.366	0.368691	0.0483061	1
ENSG00000239407	Z68871.1	113.901	0.30847	0.0483966	1
ENSG00000267426	AC087289.3	2.09431	3.21537	0.0485566	1
ENSG00000233224	NA	25.2757	-0.670805	0.048732	1
ENSG00000134940	ACRV1	25.8231	-0.706866	0.0488488	1
ENSG00000258445	AL132777.1	9.57945	-0.928898	0.0489986	1
ENSG00000107738	VSIR	2.7952	2.52791	0.0490084	1
ENSG00000250266	LINC01612	2.46228	2.16927	0.0493141	1
ENSG00000181634	TNFSF15	397.423	0.197645	0.0493362	1
ENSG00000134569	LRP4	13.2443	-0.83495	0.049428	1
ENSG00000233543	CHTF8P1	2.39886	-2.3687	0.0494437	1
ENSG00000083307	GRHL2	6272.88	-0.0741242	0.0495016	1
ENSG00000251279	SMIM15-AS1	10.8807	-0.94332	0.0495152	1
ENSG00000246548	LINC02288	18.0641	0.776792	0.0497379	1
ENSG00000238258	AL121748.2	4.6581	-2.05268	0.04976	1
ENSG00000175155	YPEL2	370.219	0.195584	0.0498531	1
ENSG00000232456	AL355994.2	1.37573	-3.44804	0.0498994	1
ENSG00000267002	AC060780.1	120.215	-0.307451	0.0499132	1
ENSG00000204308	RNF5	512.759	0.156395	0.0499736	1
ENSG00000133246	PRAM1	11.0606	-1.17034	0.0502029	1
ENSG00000138771	SHROOM3	7714.3	-0.0805954	0.0502574	1
ENSG00000124380	SNRNP27	322.525	0.190588	0.0502806	1
ENSG00000250568	AC098591.2	24.5872	-0.627591	0.0503959	1
ENSG00000166295	ANAPC16	1558.77	0.125196	0.0503979	1
ENSG00000236773	AC092809.3	2.55491	-2.55749	0.0505411	1
ENSG00000204832	ST8SIA6-AS1	1574.51	0.106283	0.0505422	1
ENSG00000173207	CKS1B	1165.64	0.149682	0.0505576	1
ENSG00000141027	NCOR1	11784.6	-0.0718592	0.0505633	1
ENSG00000168734	PKIG	471.207	0.227182	0.0508089	1
ENSG00000154229	PRKCA	893.138	-0.112397	0.0508176	1
ENSG00000176371	ZSCAN2	711.579	0.146616	0.0508243	1
ENSG00000166391	MOGAT2	37.3085	-0.465394	0.0509053	1
ENSG00000257894	AC027288.3	3.29527	-2.79133	0.0510201	1
ENSG00000202479	RF00016	2.44175	-2.42157	0.0513109	1
ENSG00000214851	LINC00612	16.452	0.752359	0.0514687	1
ENSG00000140526	ABHD2	25298.1	-0.0916392	0.0514761	1
ENSG00000232093	DCST1-AS1	158.17	0.238888	0.0514865	1
ENSG00000081181	ARG2	2988.64	0.114769	0.0516153	1
ENSG00000254982	NA	60.398	-0.389803	0.0517129	1
ENSG00000139890	REM2	32.5609	-0.603673	0.0518151	1
ENSG00000180019	AC079741.1	1.20048	3.40331	0.0518789	1
ENSG00000231249	ITPR1-DT	21.2231	0.696434	0.0521127	1
ENSG00000147041	SYTL5	9.47011	1.1976	0.0521736	1
ENSG00000168944	CEP120	657.303	0.139224	0.0522236	1
ENSG00000187609	EXD3	139.796	-0.277145	0.0525797	1
[truncated: 57,398 more rows]

## Sheet: 6h_1ae_5uM_vsDMSO
GeneID	Gene	baseMean	log2FoldChange	pvalue	padj
[truncated: 57,860 more rows]

[truncated: 3 more sheets: 6h_EPI001_25uM_vsDMSO, 6h_1ae_0p5uM_vsDMSO, 6h_EPI001_2p5uM_vsDMSO]
