# Supplementary material for: Rational optimization of a transcription factor activation domain inhibitor
Source: Nat Struct Mol Biol. 2023 Dec 4;30(12):1958–69. doi: 10.1038/s41594-023-01159-5 (PMC10716049; doi:10.1038/s41594-023-01159-5)
Supplement: Supplementary file 9 — RNA-Seq DESeq2 log2(FC) values by contrasts indicated in Fig. 6d–f and Extended Data Fig. 7. [file 41594_2023_1159_MOESM9_ESM.xlsx]

## Sheet: RNAseq Read Count Matrix
GeneID	Gene	6hr_DMSO_Rep1	6hr_EPI_2.5uM_Rep1	6hr_EPI_25uM_Rep1	6hr_1ae_0.5uM_Rep1	6hr_1ae_5uM_Rep1	6hr_DMSO_Rep2	6hr_EPI_2.5uM_Rep2	6hr_EPI_25uM_Rep2	6hr_1ae_0.5uM_Rep2	6hr_1ae_5uM_Rep2	6hr_DMSO_Rep3	6hr_EPI_2.5uM_Rep3	6hr_EPI_25uM_Rep3	6hr_1ae_0.5uM_Rep3	6hr_1ae_5uM_Rep3	24hr_DMSO_Rep1	24hr_EPI_2.5uM_Rep1	24hr_EPI_25uM_Rep1	24hr_1ae_0.5uM_Rep1	24hr_1ae_5uM_Rep1	24hr_DMSO_Rep2	24hr_EPI_2.5uM_Rep2	24hr_EPI_25uM_Rep2	24hr_1ae_0.5uM_Rep2	24hr_1ae_5uM_Rep2	24hr_DMSO_Rep3	24hr_EPI_2.5uM_Rep3	24hr_EPI_25uM_Rep3	24hr_1ae_0.5uM_Rep3	24hr_1ae_5uM_Rep3
ENSG00000000003	TSPAN6	337	258	334	307	267	176	218	226	329	321	285	249	282	256	237	296	304	396	364	412	632	651	423	446	521	521	424	328	526	559
ENSG00000000005	TNMD	0	0	0	0	0	0	0	0	0	0	0	0	0	0	0	0	0	0	0	0	0	0	0	0	0	0	0	0	0	0
ENSG00000000419	DPM1	1120	863	946	1100	855	628	801	706	1092	1126	788	824	950	801	733	926	962	1260	1140	1259	2020	2015	1322	1424	1581	1558	1471	1043	1637	1649
ENSG00000000457	SCYL3	509	383	485	449	442	264	318	346	493	616	312	304	408	334	379	304	304	439	320	520	531	578	520	426	740	466	466	412	478	712
ENSG00000000460	C1orf112	752	566	675	727	575	425	519	448	754	708	551	519	541	508	602	616	585	645	731	738	1230	1240	793	926	875	1051	967	634	1016	895
ENSG00000000938	FGR	3	0	0	0	0	0	1	1	0	0	0	0	0	0	0	0	0	0	0	0	0	0	3	0	0	0	0	0	0	0
ENSG00000000971	CFH	0	2	0	0	0	0	0	0	0	0	0	0	0	0	1	0	1	0	0	0	0	0	0	0	1	2	0	1	0	0
ENSG00000001036	FUCA2	1652	1279	1363	1568	1137	856	1226	1085	1610	1805	1116	1171	1274	1174	1197	1193	1104	1570	1270	1597	2205	2289	1877	1621	2163	1993	1782	1569	1935	2077
ENSG00000001084	GCLC	634	437	511	544	448	309	394	400	645	583	417	376	502	446	413	345	293	452	329	497	634	626	511	463	661	550	508	417	505	663
ENSG00000001167	NFYA	1642	1228	1445	1471	1204	925	1113	1110	1677	1668	1113	1099	1272	1127	1131	1062	1039	1296	1163	1648	2068	2182	1643	1449	2147	1743	1658	1280	1801	1949
ENSG00000001460	STPG1	240	195	217	238	207	143	180	184	277	287	150	167	224	176	187	189	150	265	193	269	301	348	273	250	369	270	248	218	275	349
ENSG00000001461	NIPAL3	2866	2153	2206	2571	2114	1463	2082	1932	2910	2947	2010	1894	2060	2154	2177	1568	1356	2219	1702	2349	2989	2879	2672	2083	3549	2473	2328	2230	2449	3032
ENSG00000001497	LAS1L	2178	1632	1442	1750	1206	1068	1436	1263	2451	1847	1716	1866	1667	1885	1530	1562	1456	1831	1745	1145	3267	3355	2309	2452	2556	3205	2513	1911	2987	1874
ENSG00000001561	ENPP4	350	261	413	389	319	217	252	299	383	404	238	281	354	255	280	238	262	361	320	519	531	518	424	412	538	352	316	282	381	703
ENSG00000001617	SEMA3F	1117	923	855	1038	856	600	839	664	1188	1228	762	826	762	923	843	713	670	919	753	1147	1310	1299	1171	1011	1848	1260	1102	1117	1200	1329
ENSG00000001626	CFTR	10	0	1	1	3	0	1	0	2	3	0	5	3	4	4	2	2	1	3	2	4	4	4	2	7	5	1	1	3	0
ENSG00000001629	ANKIB1	1751	1340	1529	1628	1305	966	1247	1203	1771	1906	1238	1247	1405	1283	1298	1270	1108	1552	1377	2005	2235	2319	1994	1554	2713	2054	1737	1671	2027	2431
ENSG00000001630	CYP51A1	160	125	140	176	116	79	130	89	136	141	117	130	111	129	120	125	117	133	122	157	222	196	137	134	233	213	161	184	212	174
ENSG00000001631	KRIT1	1251	1043	1221	1207	1058	731	875	904	1432	1320	881	839	1056	839	790	894	851	1010	1019	1340	1732	1773	1463	1209	1485	1422	1242	959	1294	1785
ENSG00000002016	RAD52	524	384	438	497	362	263	370	342	590	513	392	327	360	363	340	365	270	402	364	439	619	661	511	447	601	560	498	398	547	546
ENSG00000002079	MYH16	2	2	3	0	1	0	0	0	2	0	0	0	0	1	1	0	0	3	2	1	0	2	1	2	0	0	0	6	0	2
ENSG00000002330	BAD	1714	1150	1155	1339	1106	763	1204	914	1439	1369	1008	1036	975	1099	1065	847	832	1749	945	1468	1490	1768	1357	1285	2294	1690	1503	1554	1649	1649
ENSG00000002549	LAP3	2647	1864	1994	2210	1771	1354	1818	1605	2381	2517	1749	1734	1932	1891	1824	1845	1649	2356	1981	2055	3328	3379	2423	2391	3252	3205	2831	2145	3313	2800
ENSG00000002586	CD99	0	0	0	0	0	0	0	0	0	0	0	0	0	0	0	0	0	0	0	0	0	0	0	0	0	0	0	0	0	0
ENSG00000002587	HS3ST1	415	268	340	363	304	195	305	245	372	421	250	219	277	243	299	230	231	417	246	426	463	443	487	342	648	370	360	444	416	572
ENSG00000002726	AOC1	2	3	5	2	2	1	1	4	2	8	2	2	3	0	5	1	2	9	2	15	0	3	4	5	5	2	3	0	6	9
ENSG00000002745	WNT16	1	0	0	0	0	0	0	0	0	0	0	0	0	0	0	0	0	0	0	0	0	0	0	0	0	0	0	0	0	0
ENSG00000002746	HECW1	7	1	0	0	0	0	0	0	0	3	1	0	1	0	2	0	0	0	0	1	0	1	0	0	0	2	2	0	1	0
ENSG00000002822	MAD1L1	371	299	232	280	195	194	288	220	636	251	508	476	494	503	309	312	293	361	329	173	717	619	552	530	540	515	422	344	491	362
ENSG00000002834	LASP1	4032	2930	2867	3482	2958	1894	2759	2388	4003	4332	2726	2748	2746	2927	3056	1562	1604	3508	2166	3831	3047	3289	3894	2680	6613	2753	2653	3635	3238	4930
ENSG00000002919	SNX11	680	488	533	578	453	343	480	409	651	647	448	416	471	465	500	423	397	591	483	574	805	863	639	572	958	741	664	573	741	666
ENSG00000002933	TMEM176A	1	0	0	1	0	0	0	0	0	0	0	0	0	1	0	0	0	0	0	0	0	0	0	0	0	0	0	1	0	0
ENSG00000003056	M6PR	2508	1852	1989	2176	1661	1247	1721	1471	2333	2355	1674	1756	1848	1721	1659	1800	1646	2366	2043	2306	3356	3417	2394	2474	3236	2995	2749	2141	2982	2851
ENSG00000003096	KLHL13	117	87	81	117	75	72	80	56	105	125	78	101	68	79	73	87	79	124	101	112	176	217	135	135	178	128	137	94	171	169
ENSG00000003137	CYP26B1	18	21	17	25	12	5	13	7	15	23	22	5	14	18	16	13	16	13	12	24	24	17	20	20	28	26	10	25	18	17
ENSG00000003147	ICA1	1539	1187	1449	1371	1145	805	1112	1188	1549	1699	1045	1095	1305	1081	1217	872	808	1482	951	1613	1633	1690	1691	1207	2378	1501	1359	1376	1539	2013
ENSG00000003249	DBNDD1	1967	1456	1273	1572	1264	900	1379	1058	1921	1951	1377	1274	1191	1377	1427	858	774	1599	1007	1479	1526	1740	1629	1257	2475	1529	1368	1598	1490	1841
ENSG00000003393	ALS2	1205	958	1070	1077	908	647	801	867	1195	1308	857	777	1015	887	893	733	692	969	754	1138	1461	1350	1216	1035	1785	1146	1085	1076	1161	1399
ENSG00000003400	CASP10	38	38	19	44	24	22	25	32	46	51	33	33	22	21	30	14	16	40	19	39	31	51	30	25	61	36	38	43	45	42
ENSG00000003402	CFLAR	2254	1782	1861	2050	1669	1235	1670	1536	2550	2313	1687	1550	1715	1657	1596	1422	1252	1665	1447	1778	2575	2683	2325	1762	2769	2294	2067	1775	2061	2342
ENSG00000003436	TFPI	1738	1365	1437	1632	1268	1032	1285	1205	1787	1636	1215	1285	1424	1206	1098	1526	1494	1436	1678	1558	3098	3231	1956	2245	1674	2477	2128	1370	2129	2131
ENSG00000003509	NDUFAF7	415	342	337	421	277	264	317	274	458	419	262	298	307	332	319	239	251	388	302	378	521	564	428	383	438	481	423	327	452	478
ENSG00000003756	RBM5	3810	2838	2815	3300	2530	2158	2519	2271	3999	3492	2594	2451	2540	2597	2461	2403	1923	2679	2320	3113	4177	4308	3421	3130	4713	3882	3349	2860	3665	4112
ENSG00000003987	MTMR7	1	0	0	0	0	0	0	1	2	0	0	0	0	0	0	1	0	0	0	0	0	2	0	0	0	0	0	0	0	0
ENSG00000003989	SLC7A2	1968	1500	1685	1768	1480	1002	1364	1365	1992	1846	1394	1352	1557	1368	1268	1537	1347	1560	1578	1905	2892	2737	2193	1993	2395	2308	2097	1632	2177	2278
ENSG00000004059	ARF5	2722	1826	1848	2096	1619	1223	1754	1510	2251	2293	1551	1655	1610	1718	1663	1492	1442	2454	1590	2138	2635	2781	1904	1977	3408	2636	2329	2333	2553	2504
ENSG00000004139	SARM1	258	199	201	227	170	129	186	156	221	284	184	179	208	185	211	226	175	282	195	272	349	377	334	254	435	329	292	278	323	311
ENSG00000004142	POLDIP2	4077	2909	2941	3571	2591	1992	2975	2388	3722	3701	2644	2737	2620	2912	2782	2605	2201	3751	2882	3304	4733	4912	3532	3586	4870	4322	4167	3430	4467	3641
ENSG00000004399	PLXND1	52	26	31	33	30	21	16	23	41	35	13	26	26	27	17	19	18	20	29	21	30	21	35	31	33	42	31	20	22	24
ENSG00000004455	AK2	6344	4473	4563	5255	3963	3302	4210	3689	5815	5459	3996	4158	4116	4525	3913	4617	4363	6091	4937	5267	8833	8916	6117	6391	7906	8016	7183	5758	8002	6523
ENSG00000004468	CD38	4	0	0	1	2	0	2	1	1	1	2	4	2	0	1	0	0	0	0	0	4	2	1	1	9	0	0	0	1	4
ENSG00000004478	FKBP4	17657	12423	11036	14422	10405	8598	12492	9260	16144	15088	11587	12276	10828	12560	11261	12506	10857	15725	13730	11711	23021	23225	15645	17250	20162	21659	19555	15331	21279	15807
ENSG00000004487	KDM1A	4046	2948	2877	3429	2463	2058	2854	2394	3902	3482	2775	2662	2760	2782	2657	3110	2734	3333	3309	3365	5604	5722	4012	4134	4718	5233	4627	3673	4918	4008
ENSG00000004534	RBM6	2344	1790	1690	1924	1477	1221	1583	1500	2615	2091	1749	1695	1706	1819	1522	1629	1240	1659	1611	1649	2814	2826	2354	2016	2890	2551	2369	1808	2489	2287
ENSG00000004660	CAMKK1	1457	1041	1008	1254	874	680	952	895	1559	1411	1016	1044	969	1033	1021	979	856	1175	913	958	1679	1829	1410	1314	1814	1570	1439	1292	1516	1346
ENSG00000004700	RECQL	1187	912	1214	1193	971	757	768	799	1256	1303	805	923	1015	890	863	1082	965	1032	1150	1320	1941	2012	1313	1333	1602	1625	1498	919	1636	1638
ENSG00000004766	VPS50	451	335	415	430	373	301	307	299	525	468	336	314	399	332	372	399	368	388	438	531	749	768	559	592	667	625	533	402	608	841
ENSG00000004776	HSPB6	11	10	12	12	11	10	8	7	8	8	9	10	5	2	9	11	9	9	15	22	17	15	27	14	30	20	15	34	10	29
ENSG00000004777	ARHGAP33	414	299	331	339	291	206	274	266	432	379	351	334	331	297	318	251	234	325	279	434	496	486	476	367	723	518	450	452	499	444
ENSG00000004779	NDUFAB1	3101	2327	2426	2801	1931	1751	2139	1904	2989	2863	2165	2222	2436	2344	2143	2529	2256	3313	2664	3065	4708	4796	2986	3427	4221	4304	3751	2825	4240	4091
ENSG00000004799	PDK4	4	0	0	0	0	0	0	0	0	0	0	0	0	0	1	0	1	1	0	0	1	0	0	0	0	0	0	1	0	0
ENSG00000004809	SLC22A16	6	1	3	1	1	1	1	3	2	4	4	1	1	1	2	2	2	4	1	4	1	5	1	0	0	2	0	1	1	2
ENSG00000004838	ZMYND10	63	57	44	69	39	33	52	45	77	71	36	44	55	51	59	31	51	68	50	63	87	98	70	58	106	83	60	81	75	82
ENSG00000004846	ABCB5	21	7	9	10	18	3	6	8	2	8	6	5	14	8	6	4	6	13	5	8	8	18	9	11	11	7	6	9	5	16
ENSG00000004848	ARX	55	37	23	37	41	18	27	24	49	62	32	20	29	24	38	12	10	33	28	34	35	24	30	20	55	21	23	33	21	45
ENSG00000004864	SLC25A13	1749	1250	1389	1544	1241	938	1170	1068	1674	1664	1235	1286	1281	1319	1271	1428	1189	1384	1377	1437	2459	2435	1615	1726	1805	2147	1812	1394	2049	1818
ENSG00000004866	ST7	5736	4196	5273	5164	4330	3050	4054	4116	5499	5914	3756	3995	4603	4038	4234	4227	3953	6114	5147	6370	8202	8555	6794	6442	8981	7056	7203	5795	7787	7310
ENSG00000004897	CDC27	2881	2153	2464	2833	2083	1733	1947	1670	2969	2891	2015	2033	2231	2000	1907	2437	2292	2528	2660	3325	5017	5033	3359	3566	3651	3666	3317	2136	3744	4353
ENSG00000004939	SLC4A1	5	2	4	0	2	0	5	2	1	1	2	2	1	0	3	1	3	2	0	1	1	5	1	0	3	0	0	1	3	5
ENSG00000004948	CALCR	2	0	0	0	0	0	0	0	0	1	0	0	0	0	0	0	0	0	0	0	0	0	0	0	0	0	0	0	0	0
ENSG00000004961	HCCS	589	422	443	528	374	313	432	342	521	521	403	461	407	448	337	375	322	552	474	445	758	755	475	524	661	653	605	445	700	561
ENSG00000004975	DVL2	2232	1772	1853	1863	1571	1152	1637	1446	2184	2309	1584	1559	1698	1706	1587	1549	1370	2062	1674	1947	2699	2714	2321	1956	3235	2532	2337	1952	2567	2327
ENSG00000005001	PRSS22	33	17	29	43	23	18	27	18	29	30	23	22	21	20	20	23	14	28	14	29	30	27	33	18	67	26	24	43	25	49
ENSG00000005007	UPF1	4884	3689	2947	3924	2825	2224	3307	2696	5290	4312	4061	3671	3482	4025	3381	3559	3291	3734	3487	2694	6882	6403	4947	4840	6146	6263	5418	4159	5602	4380
ENSG00000005020	SKAP2	1446	1111	1245	1351	1081	809	1053	1008	1438	1625	1066	925	1180	1008	1085	1020	950	1163	1113	1779	1964	1985	1677	1470	2290	1591	1490	1227	1671	2325
ENSG00000005022	SLC25A5	13151	9501	10338	11509	8971	6868	9273	8030	11646	12542	8637	9064	9683	9296	9417	10443	9876	14213	11880	12408	19647	20589	13205	15064	17468	18353	16104	12626	17518	15833
ENSG00000005059	MCUB	27	17	8	11	23	15	14	24	26	25	15	16	10	11	13	14	27	23	36	31	34	27	22	34	39	24	21	21	28	37
ENSG00000005073	HOXA11	3	0	3	0	1	0	4	2	2	2	1	6	2	1	10	3	2	4	5	6	6	8	2	0	4	1	2	0	3	2
ENSG00000005075	POLR2J	1206	851	904	1019	784	615	879	772	1075	1071	782	812	758	877	846	780	697	1331	892	1068	1353	1517	1014	1027	1605	1441	1360	1210	1436	1289
ENSG00000005100	DHX33	2368	1794	1684	2025	1519	1126	1552	1366	2247	2160	1576	1553	1550	1704	1519	1678	1505	1557	1669	1605	3126	2933	2004	2122	2280	2675	2332	1772	2502	1942
ENSG00000005102	MEOX1	1	0	0	0	0	0	0	0	1	0	0	0	0	0	0	0	0	0	0	0	0	0	0	0	0	0	0	0	0	0
ENSG00000005108	THSD7A	15	15	6	19	9	8	10	10	19	8	11	8	18	11	11	17	5	4	6	10	11	10	8	5	8	18	10	10	6	9
ENSG00000005156	LIG3	2800	1996	1957	2216	1721	1366	1925	1667	2693	2588	1844	1886	1922	1946	1843	2016	1785	2127	2061	2222	3563	3613	2610	2650	3501	3423	3000	2348	3220	2758
ENSG00000005175	RPAP3	1007	847	999	1165	814	647	736	733	1209	1147	792	838	1061	766	754	888	914	1008	1054	1297	1935	1820	1328	1298	1474	1456	1207	877	1354	1727
ENSG00000005187	ACSM3	838	582	675	670	534	448	523	526	796	783	531	576	650	588	530	719	603	697	707	792	1243	1374	741	838	1019	1162	1128	661	1177	969
ENSG00000005189	REXO5	1012	745	710	869	715	527	692	593	966	891	699	646	674	722	611	873	690	817	859	753	1520	1561	976	1004	1127	1443	1163	814	1250	924
ENSG00000005194	CIAPIN1	2653	1944	1861	2345	1591	1333	1748	1480	2480	2265	1901	1737	1641	1894	1746	1823	1588	2187	1926	1932	3123	3449	2201	2415	2942	3119	2856	2239	3025	2400
ENSG00000005206	SPPL2B	1469	1050	976	1098	952	703	970	896	1581	1278	1164	1001	999	1145	1036	862	854	1111	930	1004	1695	1608	1555	1244	1887	1657	1380	1319	1524	1402
ENSG00000005238	FAM214B	761	599	526	598	455	347	532	445	622	692	487	539	499	506	519	360	337	587	362	549	694	711	612	520	917	652	530	543	578	677
ENSG00000005243	COPZ2	10	4	3	10	7	1	4	4	5	1	5	2	6	3	6	3	2	7	4	2	9	8	4	3	8	1	5	5	9	13
ENSG00000005249	PRKAR2B	748	582	722	751	669	448	585	547	757	839	552	525	662	535	578	586	556	867	686	1071	1172	1207	1021	916	1462	939	836	871	1056	1511
ENSG00000005302	MSL3	775	563	676	740	566	444	516	522	762	797	492	574	635	564	520	571	531	738	614	824	1001	1071	780	833	1031	955	873	683	952	1066
ENSG00000005339	CREBBP	5918	4376	4532	4880	4098	2906	4118	3688	6052	5920	4360	3957	4251	4408	4250	3646	3094	3941	3629	4713	6486	6243	5423	4793	7436	6120	5210	4458	5441	5598
ENSG00000005379	TSPOAP1	89	104	74	90	52	50	79	68	156	94	88	91	106	92	65	49	38	62	51	73	110	98	139	79	166	85	64	113	77	126
ENSG00000005381	MPO	0	0	1	0	0	0	0	0	0	1	0	1	0	0	0	0	0	0	0	1	0	0	0	1	0	0	1	0	0	1
ENSG00000005421	PON1	3	1	1	0	1	0	0	0	0	0	0	1	0	0	0	0	0	0	0	1	0	0	0	0	0	1	0	0	0	0
ENSG00000005436	GCFC2	820	604	740	794	566	492	548	520	826	732	619	604	648	588	477	679	695	721	712	837	1450	1474	890	1014	896	1065	1037	684	996	1160
ENSG00000005448	WDR54	481	350	377	396	304	211	326	290	418	396	294	316	292	322	339	344	313	499	380	408	581	624	437	438	616	615	540	494	606	502
ENSG00000005469	CROT	1365	1120	1018	1263	731	834	953	729	1328	948	1058	1019	880	982	586	948	856	845	905	684	1940	1869	1117	1273	815	1616	1330	829	1331	866
ENSG00000005471	ABCB4	3	2	2	4	2	0	3	3	2	3	1	1	2	2	4	2	2	5	7	2	7	8	3	9	4	0	5	2	7	2
ENSG00000005483	KMT2E	3736	2756	2889	3241	2724	1922	2515	2339	3773	3773	2597	2537	2652	2636	2481	2469	2115	2829	2530	3442	4558	4414	3888	3183	4932	3741	3538	2765	3676	4359
ENSG00000005486	RHBDD2	655	451	474	529	371	269	377	319	520	625	425	431	383	417	460	353	339	649	387	567	634	614	631	513	953	663	645	621	665	688
ENSG00000005513	SOX8	483	394	398	428	310	242	382	302	527	478	413	369	333	426	376	232	262	467	275	434	472	508	453	335	759	425	417	418	444	553
ENSG00000005700	IBTK	1663	1342	1489	1623	1308	992	1172	1141	1745	1732	1241	1184	1490	1256	1194	1217	1168	1359	1362	1983	2398	2410	2128	1762	2251	1896	1618	1314	1680	2607
ENSG00000005801	ZNF195	1827	1387	1665	1746	1251	1055	1290	1204	1906	1792	1283	1264	1377	1242	1235	1252	1132	1475	1374	1887	2321	2520	2021	1699	2520	2028	1891	1515	1938	2402
ENSG00000005810	MYCBP2	26415	20021	21412	23323	18280	14415	18271	17464	28359	26141	19255	19011	20471	19749	17676	19533	16555	20106	19041	20038	35028	35375	30396	24226	29538	30161	27256	22680	26876	26936
ENSG00000005812	FBXL3	1313	971	1114	1184	920	771	890	873	1220	1290	912	889	1073	900	822	920	964	1097	1110	1275	2011	1900	1377	1371	1597	1500	1308	1017	1500	1815
ENSG00000005844	ITGAL	6	2	2	6	2	0	4	1	6	1	3	0	1	4	3	1	0	2	2	2	8	5	5	2	2	4	4	2	3	0
ENSG00000005882	PDK2	986	705	747	871	647	516	720	624	949	1057	676	636	677	720	732	572	541	912	675	943	1003	1032	987	758	1538	992	900	970	976	1167
ENSG00000005884	ITGA3	475	335	360	460	388	242	373	304	519	493	339	339	349	345	361	198	207	396	249	460	422	382	497	354	838	350	345	426	423	582
ENSG00000005889	ZFX	2324	1764	1970	2055	1603	1185	1646	1516	2395	2167	1591	1664	1790	1659	1458	1605	1411	1652	1650	1854	2988	3180	2232	1991	2562	2739	2287	1758	2410	2495
ENSG00000005893	LAMP2	5260	4121	5149	5239	4600	3160	3967	3800	5765	5985	4009	3953	4808	4137	4187	3596	3440	5268	4350	6399	7576	7373	6397	5386	7936	5432	5236	4771	5650	9102
ENSG00000005961	ITGA2B	8	4	1	2	5	0	6	3	0	5	2	7	4	4	4	2	2	4	0	5	4	6	11	2	12	4	3	2	5	7
ENSG00000005981	ASB4	0	0	0	0	0	0	1	0	0	0	0	0	0	0	0	0	0	0	0	0	0	0	0	0	0	0	0	0	0	0
ENSG00000006007	GDE1	3773	2791	2878	3321	2639	1823	2656	2293	3532	3923	2617	2390	2560	2648	2712	2270	1993	3027	2596	3337	3960	4264	3228	3091	4703	3633	3398	3028	3651	4269
ENSG00000006015	REX1BD	858	666	606	679	556	405	593	517	750	733	551	551	551	532	521	507	431	840	520	670	872	929	650	699	1109	960	783	893	792	741
ENSG00000006016	CRLF1	6	1	5	2	3	10	6	4	9	2	3	6	3	4	9	6	16	5	5	12	14	15	10	6	13	5	14	10	15	14
ENSG00000006025	OSBPL7	12	2	5	10	5	9	12	2	7	5	4	10	6	5	2	3	5	3	6	3	7	3	6	2	9	7	3	7	8	10
ENSG00000006042	TMEM98	1667	1231	1351	1560	1254	971	1253	1062	1588	1574	1122	1163	1224	1231	1216	1061	1004	1706	1187	1712	1863	2140	1601	1536	2495	1781	1663	1623	1844	2155
ENSG00000006047	YBX2	68	37	48	57	50	27	52	39	86	54	58	31	34	34	31	28	41	42	30	48	63	81	53	49	89	99	72	58	60	57
ENSG00000006059	KRT33A	0	0	0	0	0	0	0	0	0	0	0	0	0	0	0	0	0	0	0	0	0	0	0	0	0	0	0	0	0	0
ENSG00000006062	MAP3K14	581	405	384	444	341	277	398	359	613	594	407	355	420	391	423	265	243	401	272	339	522	525	492	363	563	525	464	357	479	470
ENSG00000006071	ABCC8	82	53	57	66	49	36	61	55	63	56	40	44	50	44	49	44	38	69	48	88	65	69	86	49	107	69	63	69	64	72
ENSG00000006116	CACNG3	0	0	0	0	0	0	0	0	0	0	0	0	0	0	0	0	0	0	0	0	0	0	0	0	0	0	0	0	0	0
ENSG00000006118	TMEM132A	4856	3794	3270	3668	2808	2311	3476	2927	5432	4378	3725	3683	3639	4014	3446	2578	2432	4314	2846	2941	5249	5176	5017	4134	6965	4570	3950	4541	4747	4874
ENSG00000006125	AP2B1	7186	5373	5963	6142	5052	3584	4838	4782	6726	7317	4937	4945	5501	5214	5359	5287	4592	6445	5268	6700	9380	9343	7535	6708	9969	8430	7465	6346	7948	8186
ENSG00000006128	TAC1	1	0	0	0	0	0	0	0	0	0	0	0	0	0	0	0	0	0	0	0	0	0	0	0	0	0	0	0	0	1
ENSG00000006194	ZNF263	1980	1461	1579	1742	1309	1040	1398	1303	1892	1881	1393	1260	1334	1412	1374	1229	1060	1572	1311	1499	2193	2319	1717	1637	2451	2106	1873	1693	2132	2021
ENSG00000006210	CX3CL1	4	0	0	1	0	0	0	0	0	0	0	0	0	0	0	0	0	0	0	0	0	0	0	0	0	1	0	0	0	0
ENSG00000006282	SPATA20	5019	3517	3728	4215	3344	2399	3311	3056	4552	4683	3102	3093	3271	3316	3425	2677	2404	4634	2949	4438	4894	5218	4990	4099	7847	4826	4373	5040	4858	5813
ENSG00000006283	CACNA1G	38	12	34	28	37	22	29	43	45	51	18	16	19	30	37	11	14	34	15	40	24	22	28	19	81	23	21	21	48	43
ENSG00000006327	TNFRSF12A	390	316	312	324	283	243	322	235	397	388	269	277	262	277	285	124	131	386	174	291	245	264	273	241	454	263	275	296	251	329
ENSG00000006377	DLX6	1	0	0	0	0	0	0	0	0	0	0	0	0	0	0	0	0	0	0	0	0	0	0	0	0	0	0	0	0	0
ENSG00000006432	MAP3K9	1400	1035	964	1115	851	717	891	894	1600	1259	1124	996	1097	1063	949	776	668	865	755	845	1552	1384	1270	1166	1578	1234	1159	1008	1199	1319
ENSG00000006451	RALA	1049	752	787	921	729	578	759	607	1009	988	654	685	754	670	661	716	711	992	825	1114	1501	1424	1078	1001	1368	1188	1040	815	1225	1315
ENSG00000006453	BAIAP2L1	3137	2365	2651	2819	2287	1563	2190	2096	3008	3255	2137	2165	2294	2265	2350	2003	1886	2710	2126	2741	3606	3721	3070	2653	4081	3400	3063	2976	3174	3219
ENSG00000006459	KDM7A	714	609	752	732	598	416	556	573	804	861	506	508	730	532	526	353	327	515	383	803	716	755	769	532	1084	525	571	576	596	1073
ENSG00000006468	ETV1	505	403	410	416	370	231	351	274	466	494	343	311	357	335	350	349	317	415	355	446	724	728	473	414	577	605	517	370	558	551
ENSG00000006530	AGK	1423	1024	1138	1289	969	795	886	832	1370	1410	955	1012	1040	995	961	991	854	1255	1021	1243	1665	1834	1431	1234	1777	1647	1500	1195	1663	1521
ENSG00000006534	ALDH3B1	40	35	13	39	16	17	23	20	26	24	13	27	16	17	28	31	30	32	21	41	35	53	44	24	48	46	37	31	41	52
ENSG00000006555	TTC22	3	0	4	0	2	0	0	1	4	2	0	0	0	1	0	0	1	0	0	3	0	0	2	1	6	0	0	4	0	5
ENSG00000006576	PHTF2	1051	886	1038	1123	885	650	809	713	1140	1183	855	838	900	786	810	948	969	941	1173	1308	2014	2039	1213	1458	1417	1517	1406	856	1423	1639
ENSG00000006606	CCL26	0	0	0	0	0	0	0	0	0	0	0	0	3	0	0	0	0	0	0	0	0	0	0	0	0	0	0	0	1	0
ENSG00000006607	FARP2	3832	2990	3139	3402	2627	1970	2775	2406	3980	3629	2863	2676	2836	2832	2584	2547	2277	2848	2783	3058	4907	4965	3749	3557	4325	4225	3929	2917	3893	3738
ENSG00000006611	USH1C	5	0	0	0	0	0	0	0	0	0	2	1	2	2	0	0	1	0	1	1	3	0	0	3	0	3	0	0	1	0
ENSG00000006625	GGCT	3171	2456	2646	2962	2285	1729	2117	1891	3002	2936	2207	2255	2466	2237	2185	2706	2576	3092	2834	2941	5051	5413	3349	3577	3751	4329	3932	2775	4288	3972
ENSG00000006634	DBF4	875	682	832	865	620	533	605	588	926	999	622	654	787	694	541	995	899	810	1098	1043	2002	1934	1083	1458	1099	1556	1322	719	1385	1335
ENSG00000006638	TBXA2R	16	7	7	11	5	1	0	4	7	8	5	4	4	6	5	1	1	6	0	1	8	9	5	8	15	6	4	5	2	8
ENSG00000006652	IFRD1	860	721	1031	851	936	565	615	707	904	1269	648	622	805	655	841	684	604	999	857	1588	1345	1324	1265	1000	2168	1173	1000	1084	1132	2206
ENSG00000006659	LGALS14	0	0	0	0	0	0	0	1	0	0	0	0	0	0	0	0	0	0	0	0	0	0	0	0	0	0	0	0	0	0
ENSG00000006695	COX10	986	711	738	805	637	483	664	551	900	900	653	692	685	657	656	737	603	845	823	829	1226	1249	824	919	1224	1211	1141	801	1190	965
ENSG00000006704	GTF2IRD1	881	732	830	783	698	498	682	649	875	1041	669	619	750	685	760	511	481	831	553	808	1005	1039	1018	828	1361	951	907	878	973	1111
ENSG00000006712	PAF1	1487	1182	777	1249	798	720	1073	849	1963	1292	1500	1504	1511	1708	1168	1021	951	1431	1213	788	2471	2302	1785	1678	2109	2248	1709	1317	1872	1343
ENSG00000006715	VPS41	1505	1185	1496	1447	1104	830	1048	1005	1564	1626	1063	1076	1330	1100	1164	995	849	1327	1006	1735	1871	1920	1818	1312	2354	1644	1476	1389	1568	2371
ENSG00000006740	ARHGAP44	1043	787	889	935	746	578	725	663	1038	1096	712	720	768	752	812	559	535	880	642	1061	1004	1019	1060	865	1543	963	987	927	985	1281
ENSG00000006744	ELAC2	4727	3443	3104	3860	2908	2318	3305	2495	4451	4135	3242	3335	2995	3364	3109	3234	2866	3872	3330	3328	5565	5821	4271	4128	5604	5385	4952	3731	5264	4190
ENSG00000006747	SCIN	38	45	49	45	33	38	28	20	60	55	52	31	42	49	40	41	41	47	42	40	86	80	45	48	61	75	69	35	82	47
ENSG00000006756	ARSD	1530	1127	1234	1268	1043	709	1059	972	1471	1508	1028	1012	1143	1039	1081	757	686	1267	849	1410	1440	1298	1445	1121	1986	1358	1236	1283	1257	1533
ENSG00000006757	PNPLA4	556	459	479	517	388	301	464	362	534	555	412	425	405	407	386	349	321	617	379	576	639	662	549	463	794	598	585	569	592	693
ENSG00000006788	MYH13	3	0	0	0	0	1	0	0	0	0	0	0	0	0	1	0	0	0	0	0	0	0	1	0	0	0	0	0	0	0
ENSG00000006831	ADIPOR2	3298	2418	2591	3115	2422	1734	2315	2041	3229	3487	2213	2275	2264	2454	2384	2384	2030	2729	2539	3053	4439	4235	3355	3160	4426	3596	3435	2777	3856	3616
ENSG00000006837	CDKL3	41	15	20	32	25	20	22	32	32	35	19	12	25	21	13	22	14	28	21	24	44	32	58	35	36	25	30	30	35	34
ENSG00000007001	UPP2	0	1	0	0	0	0	0	0	2	0	0	0	0	1	0	0	0	0	2	0	0	2	0	0	0	0	1	0	3	0
ENSG00000007038	PRSS21	0	0	0	0	0	0	0	2	0	0	0	0	1	0	2	0	0	0	1	0	0	0	0	0	1	0	0	0	0	0
ENSG00000007047	MARK4	662	479	503	577	452	303	451	408	662	638	438	432	467	501	429	328	317	496	388	546	632	616	623	490	915	644	541	533	637	676
ENSG00000007062	PROM1	8	0	0	0	0	1	0	1	1	1	1	1	0	0	0	0	0	0	0	0	0	1	0	0	0	2	0	1	0	1
ENSG00000007080	CCDC124	3168	2210	2042	2578	1929	1534	2256	1688	2941	2765	2219	2308	2133	2368	2257	2186	1847	3006	2150	1894	3971	4130	2740	3066	3783	4219	3478	2862	3679	2702
ENSG00000007129	CEACAM21	0	0	0	0	0	1	0	0	0	0	0	0	0	0	0	0	1	0	0	0	0	0	0	0	0	0	0	0	0	0
ENSG00000007168	PAFAH1B1	5070	3730	4260	4802	3899	2646	3249	3179	4983	5267	3384	3435	3670	3534	3637	3381	3072	4202	3763	5558	6542	6521	5379	5019	7583	5385	4990	4265	5750	7330
ENSG00000007171	NOS2	1	0	1	0	0	0	1	0	0	0	0	1	1	0	0	0	0	0	0	0	0	1	2	0	1	0	0	0	0	0
ENSG00000007174	DNAH9	14	6	12	6	6	5	14	4	5	2	5	3	7	5	10	3	6	4	9	13	13	11	8	7	12	12	8	2	11	16
ENSG00000007202	KIAA0100	21696	15831	15569	18508	14539	10621	14519	12537	20539	21276	15206	15158	15047	16149	15391	14766	12778	16707	15054	15292	26764	26448	19381	18927	24965	24478	21640	17204	22862	19292
ENSG00000007216	SLC13A2	0	0	0	0	0	0	0	0	1	0	0	0	0	0	0	0	0	0	0	0	0	0	0	0	0	0	0	0	0	2
ENSG00000007237	GAS7	3	2	1	2	0	2	1	2	1	4	4	4	3	3	2	2	1	1	0	1	4	1	2	3	5	4	1	6	2	2
ENSG00000007255	TRAPPC6A	345	267	250	293	235	191	226	206	354	326	233	203	248	227	220	166	170	355	210	337	349	371	335	240	512	306	321	338	327	366
ENSG00000007264	MATK	2	1	1	1	1	0	2	1	3	1	0	0	1	0	1	1	0	2	0	1	2	2	2	0	0	1	3	1	0	5
ENSG00000007306	CEACAM7	0	0	0	0	0	0	0	0	0	0	0	0	0	0	0	0	0	0	0	0	0	0	0	0	0	0	0	0	0	0
ENSG00000007312	CD79B	3	0	1	0	0	3	0	0	1	0	0	5	0	0	4	0	0	0	0	2	0	0	0	0	1	0	0	0	0	0
ENSG00000007314	SCN4A	5	0	1	0	0	0	0	0	0	0	0	0	1	2	0	0	0	0	1	3	1	0	0	0	2	0	3	0	2	0
ENSG00000007341	ST7L	1019	693	851	922	799	510	726	625	1069	1027	651	668	744	665	696	685	616	932	761	945	1251	1301	1005	1020	1263	1124	978	762	1044	1232
ENSG00000007350	TKTL1	3	6	1	3	3	3	4	0	2	3	5	2	7	6	2	3	3	3	1	3	5	3	6	14	3	6	7	2	3	1
ENSG00000007372	PAX6	4	0	0	0	0	0	0	0	0	0	0	0	0	0	0	0	0	0	0	0	0	0	0	0	0	0	0	1	0	1
ENSG00000007376	RPUSD1	1894	1285	1052	1389	1068	815	1196	880	1811	1461	1218	1214	1049	1250	1149	1154	971	1565	1185	1013	2197	2229	1536	1528	1707	2029	1818	1368	2013	1188
ENSG00000007384	RHBDF1	1426	1013	1048	1154	910	655	938	737	1249	1302	903	826	871	933	933	703	568	900	672	795	1103	1089	1038	853	1423	1182	941	1042	1064	992
ENSG00000007392	LUC7L	1253	959	925	1146	882	728	928	811	1441	1127	961	947	858	906	801	858	772	967	851	1025	1657	1694	1298	1224	1468	1484	1277	1134	1388	1348
ENSG00000007402	CACNA2D2	385	258	267	287	245	159	221	227	350	354	257	260	251	213	258	175	153	256	174	251	329	306	282	213	439	325	227	268	292	289
ENSG00000007516	BAIAP3	224	163	207	208	156	137	134	119	214	191	166	155	148	152	191	113	110	143	85	135	228	200	224	151	365	187	180	196	198	225
ENSG00000007520	TSR3	1060	808	794	879	692	498	809	653	945	937	669	715	620	700	707	649	637	1084	760	826	1162	1315	849	915	1547	1242	1195	1148	1260	1036
ENSG00000007541	PIGQ	1128	833	849	994	835	564	771	687	1177	1087	784	733	792	809	851	745	623	1120	822	994	1351	1291	1086	967	1724	1366	1219	1117	1262	1138
ENSG00000007545	CRAMP1	627	468	427	517	383	305	485	388	706	513	484	423	471	518	396	415	330	426	408	407	834	750	608	563	772	748	616	510	674	601
ENSG00000007866	TEAD3	650	428	438	516	371	298	405	352	601	547	395	406	415	437	392	345	327	426	364	449	685	587	503	497	717	644	524	476	571	501
ENSG00000007908	SELE	2	0	2	0	0	0	0	0	0	1	2	0	2	0	1	0	2	2	0	2	1	0	3	0	1	1	0	0	1	2
ENSG00000007923	DNAJC11	4001	2952	2600	3194	2398	2001	2763	2234	3997	3584	2874	2806	2653	3017	2673	3119	2615	3158	3238	2507	5667	5658	3758	4356	4598	5346	4680	3365	4938	3564
ENSG00000007933	FMO3	2	0	0	0	0	0	0	0	0	0	0	0	1	0	0	0	1	0	0	0	0	0	0	0	0	0	0	0	0	1
ENSG00000007944	MYLIP	789	602	665	689	470	413	578	523	799	718	598	574	555	518	534	517	474	636	567	577	1009	1029	756	745	893	901	776	648	865	795
ENSG00000007952	NOX1	1	2	2	3	4	4	3	4	3	3	4	0	6	2	3	1	3	10	0	2	2	3	3	2	4	2	2	8	3	4
ENSG00000007968	E2F2	797	615	533	694	587	381	599	459	881	788	609	584	513	595	588	786	711	736	819	576	1396	1378	942	963	987	1330	1172	871	1290	715
ENSG00000008018	PSMB1	3868	2983	3417	3624	2754	2163	2756	2559	3718	3804	2704	2856	2982	2763	2708	2843	2674	4112	3109	3740	5273	5471	3667	3916	5156	4632	4199	3363	4872	4744
ENSG00000008056	SYN1	1	0	2	0	1	0	0	2	0	5	3	0	0	0	0	0	1	0	0	0	0	2	0	3	0	2	0	0	0	0
ENSG00000008083	JARID2	1568	1127	1171	1242	1116	787	989	996	1511	1497	1005	1088	1145	1087	1105	965	890	1263	1040	1450	1945	1789	1590	1390	2464	1642	1384	1363	1471	2085
ENSG00000008086	CDKL5	150	93	139	118	114	77	100	105	150	178	102	69	124	82	105	95	78	139	87	155	166	152	139	117	196	123	117	155	128	180
ENSG00000008118	CAMK1G	2	2	0	0	0	1	0	1	0	0	0	0	1	0	0	0	0	0	0	0	0	0	1	2	0	0	0	1	1	3
ENSG00000008128	CDK11A	29	27	30	18	20	12	22	21	44	25	25	32	23	33	24	12	17	24	28	18	43	44	19	32	36	31	24	23	42	28
ENSG00000008130	NADK	3132	2459	2332	2705	2122	1711	2354	1958	3176	2958	2324	2261	2163	2357	2164	2149	2049	2721	2265	2379	3887	4015	3071	2921	3824	3580	3239	2906	3503	2988
ENSG00000008196	TFAP2B	2	2	0	0	0	0	1	0	0	0	0	0	0	0	0	0	0	0	0	0	0	0	0	0	2	0	0	0	0	0
ENSG00000008197	TFAP2D	1	0	0	0	0	0	0	0	0	0	0	0	0	0	0	0	0	0	0	0	0	0	0	0	0	0	0	0	0	0
ENSG00000008226	DLEC1	16	10	11	12	12	14	21	11	21	12	9	14	11	8	18	14	9	16	6	8	7	6	7	6	20	18	14	11	18	3
ENSG00000008256	CYTH3	1987	1618	1949	1956	1683	1083	1504	1431	2164	2389	1531	1478	1585	1559	1727	1421	1342	2073	1578	2367	2775	2742	2436	2055	3448	2438	2210	2168	2429	3022
ENSG00000008277	ADAM22	699	534	635	676	554	375	546	512	776	751	493	502	569	493	527	385	391	611	506	795	879	849	735	668	1057	783	698	629	674	1035
ENSG00000008282	SYPL1	2155	1691	2016	2083	1711	1453	1492	1346	2230	2191	1667	1657	1820	1503	1525	1793	1752	2047	2014	2546	3816	3708	2638	2786	2842	2633	2401	1707	2694	3286
ENSG00000008283	CYB561	7797	5540	5427	6475	5163	3898	5276	4443	7463	7141	5325	5411	5135	5631	5397	4777	4441	6912	5076	6221	8878	9226	7263	6376	9893	8285	7270	7043	8018	7766
ENSG00000008294	SPAG9	2554	1929	2200	2347	1876	1314	1717	1708	2677	2522	1886	1662	2110	1865	1832	1784	1566	2062	1970	2332	3423	3399	2678	2430	3262	2924	2604	2019	2706	3110
ENSG00000008300	CELSR3	216	173	169	188	162	119	166	166	315	222	234	205	221	229	179	114	123	168	135	135	272	237	293	186	339	244	196	209	233	192
ENSG00000008311	AASS	389	311	316	378	328	210	312	285	368	476	286	281	323	286	301	203	203	259	225	364	362	356	393	259	572	324	304	291	300	437
ENSG00000008323	PLEKHG6	34	17	18	21	29	18	21	19	36	29	20	20	11	23	9	14	16	21	27	19	31	21	19	8	30	41	21	22	19	24
ENSG00000008324	SS18L2	628	448	510	551	402	342	410	371	614	532	416	458	450	456	401	529	506	648	571	627	1001	1074	645	785	834	877	769	499	793	863
ENSG00000008382	MPND	345	293	249	257	146	153	267	198	500	316	413	339	422	411	285	176	176	396	214	142	491	472	442	351	494	420	307	282	350	300
ENSG00000008394	MGST1	5474	4082	4865	5009	4179	3116	3660	3461	5344	5623	3640	3960	4495	3968	3825	3302	3176	5416	3850	5607	6557	6806	5665	4676	7443	5534	4903	4618	5581	7237
ENSG00000008405	CRY1	1085	862	1002	1019	934	671	776	693	1046	1295	759	787	865	764	863	758	683	974	791	1103	1418	1364	1164	1002	1665	1235	1187	1007	1280	1462
ENSG00000008438	PGLYRP1	0	0	0	0	0	0	0	0	0	0	0	0	0	0	0	0	0	0	0	0	0	0	0	0	0	0	0	0	0	0
ENSG00000008441	NFIX	36285	26821	24202	29720	23717	17340	25442	19849	36149	35018	25779	25114	23617	27043	25858	24621	21817	26268	27511	30252	46294	43670	34382	35682	50133	41360	36175	29370	40459	36342
ENSG00000008513	ST3GAL1	36116	27058	32264	31551	26011	18340	25078	26849	36281	37213	24355	24464	30064	26478	26167	18470	16953	36557	20884	32136	33859	35813	44217	27065	52497	30533	29434	38848	32636	41550
ENSG00000008516	MMP25	18	16	21	19	19	5	14	7	21	27	19	9	15	25	16	14	11	24	10	20	9	24	31	21	41	31	16	11	14	26
ENSG00000008517	IL32	21	13	18	25	10	10	5	14	14	27	15	5	14	10	16	9	5	16	4	15	13	14	10	11	26	21	11	11	18	23
ENSG00000008710	PKD1	2787	2166	2479	2054	2168	1361	1805	2444	3715	3317	2682	2370	3486	2603	2769	1978	1947	3119	2330	2826	4274	3967	5292	3466	7130	3868	3143	3817	3539	4741
ENSG00000008735	MAPK8IP2	523	374	329	371	280	234	375	289	567	456	421	442	417	485	406	318	306	496	339	270	695	633	546	491	597	621	547	456	536	406
ENSG00000008838	MED24	3062	2213	2258	2715	2005	1561	2104	1949	3074	2962	2144	2026	2022	2317	2283	2018	1811	2639	2163	2402	3535	3790	2906	2818	3920	3582	3060	2524	3413	2944
ENSG00000008853	RHOBTB2	1344	925	775	959	690	614	955	762	1435	1096	1065	1107	1110	1171	944	889	793	975	864	634	1672	1590	1234	1210	1373	1610	1289	952	1358	975
ENSG00000008869	HEATR5B	1749	1462	1617	1616	1431	1024	1160	1272	1872	1900	1244	1220	1511	1286	1242	1204	1164	1443	1278	1668	2259	2198	1921	1577	2469	2014	1724	1434	1899	2165
ENSG00000008952	SEC62	3171	2417	2531	2886	2118	1864	2229	1901	3286	3079	2293	2390	2619	2390	2055	2380	2264	2540	2562	3143	4487	4765	3474	3238	4047	3871	3407	2490	3689	4271
ENSG00000008988	RPS20	22534	16086	18722	18724	14423	11705	14917	14617	19738	19516	13683	15070	17003	15616	14861	14326	13565	23678	15918	20082	25125	28862	19067	19269	30924	25460	23427	21483	26788	24232
ENSG00000009307	CSDE1	31402	23503	26894	27739	22511	17060	21572	20697	30186	32344	21322	21964	25749	22315	22072	22912	20858	27586	23872	29874	42951	44038	32494	29786	43577	37036	33504	26231	37665	39381
ENSG00000009335	UBE3C	8359	6195	6379	7088	5585	4395	5639	5076	7992	7923	5548	5835	5940	6080	5658	6189	5465	6710	6405	7303	11593	11637	8406	8304	10032	10025	8640	6768	9624	9019
ENSG00000009413	REV3L	1603	1259	1637	1648	1292	933	1184	1185	1770	1771	1134	1189	1356	1138	1193	1192	1043	1234	1312	1796	2255	2301	2061	1675	2122	1819	1751	1295	1633	2434
ENSG00000009694	TENM1	785	566	656	669	503	433	573	574	823	686	610	539	559	483	439	535	393	303	325	204	773	822	499	474	229	795	559	307	428	191
ENSG00000009709	PAX7	2	1	0	0	0	0	1	0	0	0	0	0	1	0	0	0	0	0	0	1	0	3	0	1	3	0	0	0	0	0
ENSG00000009724	MASP2	26	11	12	23	8	6	22	8	20	23	18	11	5	10	6	7	7	5	9	7	16	19	17	22	25	22	29	12	21	16
ENSG00000009765	IYD	138	127	117	160	113	76	91	101	166	164	102	95	114	109	124	92	72	107	87	158	162	172	154	97	220	171	114	114	130	171
ENSG00000009780	FAM76A	494	360	404	407	340	269	358	316	473	485	321	366	379	344	317	342	338	395	382	370	598	659	458	479	476	535	491	367	496	564
ENSG00000009790	TRAF3IP3	2	0	0	1	0	0	1	0	0	0	0	0	0	2	0	0	1	0	0	0	1	1	0	0	1	0	0	2	1	3
ENSG00000009830	POMT2	918	697	672	831	578	523	660	607	915	840	608	577	614	632	603	640	480	701	583	727	1108	1025	814	774	1083	1026	879	799	929	836
ENSG00000009844	VTA1	3955	3015	3558	3549	2774	2251	2753	2469	3903	4130	2777	2734	3225	2855	2651	2736	2953	4025	3591	4612	5714	6055	4362	4611	5549	4363	4210	3397	4967	6521
ENSG00000009950	MLXIPL	51	54	53	48	46	28	40	37	48	57	44	40	38	40	20	30	31	50	24	60	47	36	75	42	76	44	58	42	57	64
ENSG00000009954	BAZ1B	3366	2460	2165	2707	2049	1733	2071	2025	3730	3174	2559	2689	2762	2942	2340	2658	2256	2943	2783	2150	5211	4939	3884	3511	4512	4459	3893	3045	4164	3723
ENSG00000010017	RANBP9	1500	1141	1445	1348	1188	784	1067	1030	1556	1810	1064	1027	1288	1165	1255	1036	978	1408	1096	1707	2010	1964	1681	1475	2354	1629	1506	1290	1683	2177
ENSG00000010030	ETV7	6	4	2	0	0	0	2	3	6	2	1	2	5	6	2	1	3	4	9	1	6	4	4	6	0	1	6	7	6	1
ENSG00000010072	SPRTN	657	523	574	645	440	364	475	416	679	669	512	508	506	474	398	504	443	579	542	669	919	923	678	725	871	761	693	583	797	790
ENSG00000010165	METTL13	2051	1445	1320	1710	1148	1045	1505	1252	2341	1750	1628	1733	1671	1795	1503	1423	1338	1730	1449	1090	2992	2775	2034	2091	2390	2612	2351	1686	2403	1786
ENSG00000010219	DYRK4	363	308	316	306	317	184	312	283	343	382	262	275	325	265	277	291	239	431	245	408	415	564	357	349	627	425	417	419	445	473
ENSG00000010244	ZNF207	6995	4982	5059	6020	4438	3737	4840	3791	6649	6226	4737	4583	4560	4677	4337	4669	4304	5822	5064	5935	8817	9197	6411	6778	7947	7977	6999	5130	7449	7374
ENSG00000010256	UQCRC1	6892	4894	5025	5678	4590	3451	4594	4016	5813	6347	4475	4692	4548	4891	4836	4710	4134	6805	4897	5513	8103	8855	5956	6156	8709	8364	7332	6306	8014	6957
ENSG00000010270	STARD3NL	1377	983	1140	1234	907	757	884	873	1218	1271	950	997	1033	930	967	942	875	1281	1091	1172	1843	1948	1213	1375	1559	1606	1422	1024	1558	1552
ENSG00000010278	CD9	9643	6936	7624	7938	6501	5032	6711	6133	8600	9093	6037	6477	7075	6712	7032	6351	5784	9170	6666	8497	11170	11893	8327	8564	12648	10924	9574	8338	10687	9996
ENSG00000010282	HHATL	3	0	2	0	2	0	0	0	1	0	0	0	0	0	0	0	0	1	0	1	0	0	0	0	2	1	0	1	0	0
ENSG00000010292	NCAPD2	10986	8026	7734	9274	7281	5329	7293	6243	10252	10339	7398	7290	7104	7763	7533	9160	7931	8409	9746	8255	16300	16049	9730	11872	12411	14908	13373	8846	13781	9575
ENSG00000010295	IFFO1	25	17	13	28	19	10	13	11	19	21	12	16	9	12	13	8	12	15	9	6	27	23	20	13	18	20	16	11	35	7
ENSG00000010310	GIPR	1	0	3	1	1	3	0	0	3	0	0	0	3	1	0	1	1	1	0	1	0	1	1	0	2	1	0	0	2	1
ENSG00000010318	PHF7	372	271	330	365	246	157	211	255	346	301	215	264	312	249	281	260	236	294	253	274	469	505	336	334	510	445	402	320	453	378
ENSG00000010319	SEMA3G	212	143	91	130	107	96	150	108	233	147	167	159	128	188	137	130	104	172	151	118	284	255	255	184	264	236	184	160	214	181
ENSG00000010322	NISCH	3524	2561	2436	2801	2177	1771	2379	2182	4090	3000	2769	2719	2604	2903	2487	2200	1867	2853	2302	2457	4119	4096	3783	3181	4813	3858	3385	3284	3542	3477
ENSG00000010327	STAB1	39	27	13	23	12	8	19	22	20	14	22	11	7	8	10	6	9	12	7	11	16	16	21	9	29	24	10	12	17	13
ENSG00000010361	FUZ	155	137	130	108	118	76	111	113	150	130	113	98	109	108	120	73	101	146	115	150	158	156	143	114	208	141	162	179	160	137
ENSG00000010379	SLC6A13	9	7	5	4	4	1	3	2	9	7	4	2	3	7	2	1	3	6	2	4	3	5	9	3	9	9	4	5	2	1
ENSG00000010404	IDS	136	101	119	122	99	80	104	81	163	151	102	117	107	90	96	85	80	139	91	158	186	133	149	112	206	150	136	159	161	222
ENSG00000010438	PRSS3	5	3	6	0	4	3	0	1	8	3	2	0	3	0	3	1	2	0	0	1	2	2	3	0	8	2	1	0	5	6
ENSG00000010539	ZNF200	805	616	582	787	492	418	552	462	800	713	561	541	566	612	471	562	480	708	636	656	1138	1091	755	762	905	986	797	616	853	806
ENSG00000010610	CD4	13	3	1	3	7	2	5	4	6	7	3	6	2	5	10	2	1	3	0	1	3	3	5	1	5	1	0	1	1	7
ENSG00000010626	LRRC23	124	100	114	139	109	76	89	87	124	130	91	111	116	96	88	92	86	135	100	151	168	182	115	124	212	169	168	127	197	158
ENSG00000010671	BTK	0	1	1	3	3	0	1	0	2	0	1	1	0	1	0	0	0	1	2	2	3	1	1	0	3	0	0	2	0	2
ENSG00000010704	HFE	52	38	36	50	30	31	42	29	43	53	29	34	35	39	31	31	19	66	20	41	40	47	47	29	75	28	44	36	42	58
ENSG00000010803	SCMH1	4027	2847	3003	3493	2736	1985	2866	2404	3844	3924	2711	2719	2793	2801	2860	2675	2336	3486	2715	3373	4723	4877	3919	3388	5394	4339	4014	3601	4109	4288
ENSG00000010810	FYN	93	55	91	85	113	68	70	76	76	125	46	62	60	67	94	58	57	151	57	228	126	95	198	67	332	72	96	160	112	287
ENSG00000010818	HIVEP2	1996	1532	1776	1662	1651	1047	1418	1339	2044	2331	1415	1287	1654	1430	1548	1198	1034	1460	1200	1979	2113	2095	1941	1460	2863	1912	1798	1734	1887	2334
ENSG00000010932	FMO1	0	0	0	0	0	0	0	0	0	0	0	0	0	0	2	0	0	0	0	0	0	0	1	0	0	0	0	0	0	0
ENSG00000011007	ELOA	3503	2535	2336	3025	2157	1744	2392	1856	3303	3117	2398	2520	2179	2471	2185	2592	2339	2835	2773	2559	4783	4738	3210	3502	4055	4535	3943	2790	4199	3270
ENSG00000011009	LYPLA2	1374	966	932	1124	855	687	951	726	1249	1108	896	934	798	1017	879	812	757	1171	934	952	1408	1568	1018	1130	1443	1428	1221	1176	1356	1102
ENSG00000011021	CLCN6	701	501	609	610	551	374	536	505	745	669	515	446	462	522	459	408	399	570	396	650	803	698	744	565	1037	766	603	642	684	747
ENSG00000011028	MRC2	12	4	3	4	5	1	3	0	8	2	7	3	11	0	3	2	3	4	0	6	7	3	3	2	7	8	1	7	6	7
ENSG00000011052	NME1-NME2	0	0	0	0	0	0	0	0	0	0	0	0	0	0	0	0	0	0	0	0	0	0	0	0	0	0	0	0	0	0
ENSG00000011083	SLC6A7	2	0	0	0	0	0	0	0	0	0	0	0	0	0	0	0	0	0	0	0	0	0	1	0	0	0	1	0	0	0
ENSG00000011105	TSPAN9	1470	1075	974	1198	936	678	982	823	1436	1343	990	975	1013	1070	986	735	638	1002	815	975	1279	1417	1261	1147	1736	1239	1040	1062	1226	1376
ENSG00000011114	BTBD7	2723	1962	2332	2515	2037	1457	1893	1739	2771	2867	1819	1815	2135	1988	1960	1809	1563	1990	1867	2411	3451	3220	2805	2350	3365	2823	2541	2161	2675	3071
ENSG00000011132	APBA3	437	298	315	415	294	231	285	273	433	408	303	263	255	299	302	212	220	449	256	389	470	452	415	357	559	427	390	423	460	371
ENSG00000011143	MKS1	903	677	781	799	677	442	684	609	872	983	602	594	642	632	653	542	523	729	680	788	1070	1020	849	780	1202	975	895	800	964	940
ENSG00000011198	ABHD5	805	640	672	738	607	436	550	550	790	781	581	533	663	623	610	608	523	731	674	733	1155	1174	806	856	1020	1006	882	670	909	1036
ENSG00000011201	ANOS1	1	0	0	6	0	2	1	3	1	1	0	0	0	0	2	1	2	0	0	0	3	1	1	1	2	1	1	2	1	1
ENSG00000011243	AKAP8L	1829	1322	1160	1452	1054	909	1263	1125	1984	1500	1419	1317	1341	1485	1206	1185	1008	1549	1213	1165	2307	2171	1893	1651	2563	2241	1894	1654	2009	1797
ENSG00000011258	MBTD1	1088	872	1065	1073	894	580	750	792	1274	1230	764	753	943	771	764	815	757	925	859	1312	1541	1581	1314	1177	1634	1262	1102	985	1272	1733
ENSG00000011260	UTP18	1873	1364	1504	1777	1253	1054	1321	1166	1898	1875	1315	1414	1377	1427	1329	1670	1549	1889	1831	1871	3268	3274	2026	2439	2459	2731	2362	1829	2742	2586
ENSG00000011275	RNF216	1706	1351	1353	1494	1201	908	1195	1096	1834	1718	1202	1183	1288	1290	1255	1090	981	1444	1121	1520	2084	2005	1673	1558	2275	1828	1701	1469	1800	1728
ENSG00000011295	TTC19	2114	1707	1997	2056	1677	1170	1590	1536	2299	2140	1474	1578	1730	1619	1561	1685	1589	2096	1802	2345	3250	3129	2524	2325	3001	2464	2324	2008	2482	3006
ENSG00000011304	PTBP1	16665	12539	11787	14656	11130	8141	11810	9318	15509	15872	11529	11162	10751	11881	11749	12159	10696	12802	12947	11906	21759	21364	14123	16386	18196	20602	18086	12879	19706	14122
ENSG00000011332	DPF1	245	190	175	219	182	137	210	172	271	245	172	184	171	193	197	125	121	207	160	231	287	275	226	253	338	268	215	224	272	253
ENSG00000011347	SYT7	1352	977	1020	1131	940	609	893	845	1306	1390	985	900	986	1054	1016	775	652	1151	786	1049	1264	1363	1370	1088	2029	1289	1120	1172	1188	1539
ENSG00000011376	LARS2	3889	2920	2745	3339	2619	1997	2673	2320	3759	3772	2589	2762	2631	2860	2725	2805	2414	3144	3031	3010	5177	5079	3521	3865	4781	4823	4293	3253	4673	3927
ENSG00000011405	PIK3C2A	3416	2608	3223	3276	2656	1965	2324	2402	3696	3778	2492	2466	2768	2404	2402	2181	2186	2474	2407	3799	4124	4549	4121	2849	4733	3699	3342	2783	3099	5275
ENSG00000011422	PLAUR	31	8	15	8	6	8	9	6	19	14	17	19	19	16	12	14	12	19	10	6	33	26	15	26	27	29	16	18	11	14
ENSG00000011426	ANLN	4334	3268	3432	3974	2936	2414	2892	2515	4181	4029	3098	2905	3210	3026	2733	3810	3517	3284	4064	3457	6890	7497	4232	4855	4364	6266	5505	3285	5886	4160
ENSG00000011451	WIZ	3624	2692	2564	2981	2314	1704	2501	2016	3423	3422	2562	2378	2334	2421	2394	2420	2235	2898	2473	3031	4371	4242	3528	3295	4930	4370	3595	2999	4087	3546
ENSG00000011454	RABGAP1	4131	3031	3647	3780	3191	2253	2959	2946	4240	4439	2931	2912	3281	2989	2938	2611	2279	3215	2804	3771	5016	5037	4202	3621	5630	4379	3882	3403	3987	5134
ENSG00000011465	DCN	2	0	0	0	0	0	0	0	0	0	0	1	0	0	1	2	0	0	0	0	1	3	0	0	0	0	0	0	4	0
ENSG00000011478	QPCTL	254	170	188	188	119	125	153	118	216	196	160	177	145	148	159	136	122	211	130	167	285	262	193	206	258	201	237	202	275	189
ENSG00000011485	PPP5C	2425	1734	1792	2075	1587	1277	1759	1538	2315	2422	1667	1698	1631	1763	1639	1706	1514	2118	1755	1939	2936	3137	2194	2227	2960	2850	2542	2189	2820	2403
ENSG00000011523	CEP68	580	451	472	545	425	297	400	403	540	595	376	374	413	397	450	352	362	463	472	628	796	700	574	606	834	615	654	494	687	777
ENSG00000011566	MAP4K3	548	466	529	557	441	327	417	398	634	581	387	376	512	372	430	426	380	457	456	620	835	796	687	590	829	588	624	462	620	913
ENSG00000011590	ZBTB32	11	2	1	0	0	2	3	0	4	4	5	4	3	3	2	1	0	4	0	2	4	4	2	4	4	3	4	5	1	1
ENSG00000011600	TYROBP	0	0	0	0	0	0	0	0	0	0	0	0	0	0	0	0	0	0	0	0	0	0	0	0	0	0	0	0	0	0
ENSG00000011638	TMEM159	684	500	534	592	471	352	472	457	610	694	450	431	461	469	479	358	334	570	371	613	605	706	600	503	902	593	540	619	579	834
ENSG00000011677	GABRA3	281	195	250	250	214	151	207	203	272	330	194	175	208	191	223	114	120	207	158	229	235	242	252	190	425	213	174	214	234	343
ENSG00000012048	BRCA1	3102	2324	2560	2823	2428	1745	2052	1950	3183	3303	2218	2217	2366	2312	2134	2626	2419	2330	2577	2545	4918	5134	3281	3350	3491	4404	3876	2523	4071	3320
ENSG00000012061	ERCC1	1264	966	870	1127	895	636	953	771	1208	1162	896	856	819	852	914	725	618	1203	777	1079	1193	1269	1064	911	1702	1201	1163	1168	1219	1252
ENSG00000012124	CD22	1	0	0	0	0	0	0	0	2	0	0	0	1	2	0	0	0	1	0	1	0	0	2	1	0	0	1	1	0	0
ENSG00000012171	SEMA3B	177	131	143	150	98	88	117	149	222	189	153	129	162	150	170	85	62	137	90	148	168	182	197	157	313	187	144	188	182	276
ENSG00000012174	MBTPS2	1680	1337	1480	1662	1239	929	1181	1038	1709	1694	1206	1245	1361	1244	1180	1311	1203	1507	1519	1866	2714	2475	2015	1845	2196	2018	1756	1332	1942	2344
ENSG00000012211	PRICKLE3	198	154	134	194	125	91	125	110	190	239	168	146	123	151	149	144	126	154	126	141	252	220	213	190	264	287	201	167	253	182
ENSG00000012223	LTF	38	10	30	18	32	9	20	28	29	52	17	23	36	19	20	17	13	97	19	88	33	33	80	26	150	28	26	98	25	120
ENSG00000012232	EXTL3	2379	1707	1684	1941	1637	1126	1603	1377	2316	2394	1527	1637	1522	1722	1682	1470	1331	1655	1566	1873	2649	2612	2021	1919	2887	2476	2148	1941	2346	2284
ENSG00000012504	NR1H4	1	0	2	0	0	2	0	0	0	1	0	0	0	0	0	0	0	0	0	0	0	0	1	0	2	0	0	2	0	0
ENSG00000012660	ELOVL5	7040	5409	5692	5985	4438	3670	4851	4256	6388	5973	4797	5015	5504	4894	4349	5265	4549	5045	4808	4333	9933	9571	6183	6394	5438	8196	6554	4747	6694	5540
ENSG00000012779	ALOX5	2	1	3	4	2	2	2	3	2	3	3	0	1	1	1	1	0	1	5	5	2	4	5	4	6	5	6	2	3	7
ENSG00000012817	KDM5D	1175	900	1077	996	810	602	800	796	1215	1150	826	820	858	859	833	734	641	898	799	972	1324	1410	1162	992	1461	1238	1134	1019	1213	1146
ENSG00000012822	CALCOCO1	507	411	416	415	331	246	341	365	582	512	351	377	441	354	395	224	217	472	276	406	467	525	556	379	896	489	335	476	386	674
ENSG00000012963	UBR7	2178	1585	1595	1977	1461	1061	1384	1348	1948	1972	1436	1428	1470	1593	1473	1677	1382	1719	1731	1648	3078	2983	1885	2210	2224	2597	2426	1665	2546	2138
ENSG00000012983	MAP4K5	1177	910	1048	1096	892	661	830	808	1200	1157	777	814	941	803	734	881	779	875	875	1168	1616	1567	1284	1106	1389	1262	1207	899	1176	1508
ENSG00000013016	EHD3	763	554	437	681	458	360	555	435	732	625	536	505	442	550	483	442	426	619	517	660	893	852	682	691	1032	787	738	727	802	829
ENSG00000013275	PSMC4	5229	3678	3628	4194	3329	2603	3686	2901	4746	4873	3408	3416	3261	3758	3560	3065	2805	4386	3311	3893	5324	5847	4213	4176	6296	5419	4996	4172	5289	4684
ENSG00000013288	MAN2B2	2221	1690	1600	1890	1552	1032	1598	1319	2220	2251	1502	1477	1541	1586	1571	1063	938	1667	1080	1611	1998	2003	1890	1467	2615	1811	1620	1638	1686	1954
ENSG00000013293	SLC7A14	1	0	0	0	0	0	0	0	0	0	1	0	0	0	1	0	0	0	0	0	0	0	0	0	0	0	0	0	0	1
ENSG00000013297	CLDN11	1	5	2	1	5	1	6	4	5	4	3	0	1	1	0	1	2	1	1	8	1	0	0	5	4	3	3	3	1	2
ENSG00000013306	SLC25A39	5982	4273	4188	4722	3890	2892	4285	3425	5269	5170	3845	3835	3646	4156	3948	3528	3415	5640	3880	4748	6622	7079	5181	5213	7514	6905	6224	5769	6740	5493
ENSG00000013364	MVP	352	255	235	284	213	148	242	215	373	316	282	271	297	258	283	181	158	327	227	209	402	354	359	316	463	366	309	318	339	362
ENSG00000013374	NUB1	1854	1390	1606	1644	1358	980	1299	1213	1827	1947	1229	1255	1489	1305	1322	1245	1105	1532	1362	1739	2301	2398	1852	1789	2585	2052	1936	1589	2015	2260
ENSG00000013375	PGM3	1230	928	949	1068	928	712	853	832	1191	1236	865	810	974	903	864	871	840	988	907	1196	1554	1704	1309	1116	1649	1451	1241	945	1353	1627
ENSG00000013392	RWDD2A	798	636	663	687	599	478	610	551	761	846	513	506	659	568	558	453	428	632	510	804	891	938	704	655	985	848	745	590	770	878
ENSG00000013441	CLK1	1160	886	1149	1077	972	744	809	845	1236	1303	808	754	958	815	857	806	755	937	910	1267	1614	1607	1347	1192	1672	1369	1252	957	1266	1765
ENSG00000013503	POLR3B	2059	1514	1586	1788	1371	1066	1369	1197	1906	2095	1397	1433	1567	1495	1362	1510	1374	1810	1668	1810	2862	3011	2220	2034	2628	2457	2260	1744	2444	2329
ENSG00000013523	ANGEL1	2154	1628	1686	1918	1462	1055	1541	1363	2033	2040	1468	1415	1461	1544	1443	1326	1194	1642	1471	1597	2402	2428	1973	1919	2504	2273	1994	1809	2189	2025
ENSG00000013561	RNF14	1732	1337	1504	1659	1291	908	1178	1146	1674	1717	1227	1217	1486	1243	1260	1126	1108	1634	1380	1702	2334	2311	1795	1767	2227	1876	1611	1465	1861	2214
ENSG00000013563	DNASE1L1	259	258	257	301	232	152	224	190	292	298	199	201	208	214	241	185	162	324	242	266	352	324	307	311	500	357	354	322	342	359
ENSG00000013573	DDX11	1340	1052	951	1151	807	655	969	882	1592	1159	1049	1020	1003	995	928	1103	912	1173	1035	902	2137	2004	1502	1499	1580	2023	1630	1322	1831	1242
ENSG00000013583	HEBP1	1048	745	725	942	729	486	653	574	922	962	694	648	695	805	736	727	683	861	734	867	1234	1269	983	948	1263	1132	984	869	1188	1091
ENSG00000013588	GPRC5A	3	2	0	2	2	2	9	1	4	4	2	1	1	0	2	0	1	1	2	2	0	5	2	0	5	1	6	3	4	0
ENSG00000013619	MAMLD1	13	6	8	4	6	3	5	6	4	12	7	10	2	5	6	2	3	9	3	4	10	2	14	2	21	4	13	5	7	13
ENSG00000013725	CD6	1	0	0	0	0	0	0	0	0	0	0	0	0	0	0	0	0	0	0	0	0	0	0	0	0	0	1	0	0	0
ENSG00000013810	TACC3	4788	3387	2860	3903	2707	2260	3419	2374	4594	4021	3452	3412	2804	3647	3191	3902	3506	3708	4208	2845	7689	7330	4319	5479	5386	7288	6380	4211	6909	4082
ENSG00000014123	UFL1	1534	1204	1561	1517	1342	948	1064	1066	1637	1701	1085	1100	1423	1145	1162	1132	1141	1367	1271	1903	2171	2271	1881	1557	2315	1810	1639	1264	1850	2469
ENSG00000014138	POLA2	2241	1488	1406	1757	1389	1075	1552	1250	1999	1858	1495	1431	1336	1527	1333	1656	1450	1710	1642	1327	2867	2963	1916	2114	2009	2696	2424	1756	2574	1558
ENSG00000014164	ZC3H3	1118	809	740	969	668	492	756	522	1051	962	735	760	700	802	766	668	615	767	678	790	1217	1170	856	888	1271	1149	998	769	1128	914
ENSG00000014216	CAPN1	4466	3452	3022	3843	2855	2182	3250	2629	4435	4293	3110	3105	3134	3322	3333	2319	2121	3653	2438	3428	4191	4318	3984	3369	5920	3985	3525	3726	4016	4497
ENSG00000014257	ACPP	775	624	848	681	733	388	534	676	774	1102	512	508	769	578	705	339	269	664	374	816	526	591	799	458	1252	525	463	736	613	1085
ENSG00000014641	MDH1	3286	2458	2704	2938	2152	1744	2222	2006	3052	3102	2134	2289	2567	2257	2237	2446	2372	3420	2939	3287	4775	4985	3304	3569	4466	4015	3761	2952	4388	4369
ENSG00000014824	SLC30A9	3766	3072	3571	3695	2914	2245	2695	2518	3872	4219	2675	2677	3385	2739	2746	2798	2777	3701	3343	4793	5571	5956	4757	4145	5740	4642	4259	3354	4865	6232
ENSG00000014914	MTMR11	96	64	76	76	67	58	71	54	96	75	54	50	53	48	59	37	26	42	49	55	83	79	55	48	90	72	91	47	62	68
ENSG00000014919	COX15	1510	1150	1196	1350	1117	797	1094	968	1480	1528	1042	1039	1126	1098	952	1092	914	1370	1135	1459	2065	2062	1528	1441	1956	1694	1598	1309	1642	1807
ENSG00000015133	CCDC88C	1391	1125	940	1069	786	659	953	885	2086	1061	1510	1394	1313	1507	975	996	977	1159	1037	757	2180	1979	1801	1588	1704	1825	1429	1133	1449	1215
ENSG00000015153	YAF2	403	298	318	328	283	226	339	287	434	379	270	273	304	263	250	294	227	322	295	361	536	586	444	433	504	430	392	355	388	491
ENSG00000015171	ZMYND11	2872	2072	2271	2593	2234	1561	1981	1854	2848	2977	1932	1916	2127	1967	2082	1836	1576	2361	2073	2869	3568	3368	2965	2568	4303	2783	2704	2434	2953	4126
ENSG00000015285	WAS	18	29	16	20	16	11	14	16	23	21	17	13	14	15	16	15	19	18	8	23	43	26	33	32	32	35	26	31	25	18
ENSG00000015413	DPEP1	3	1	0	1	0	0	1	0	0	0	0	1	0	1	0	0	0	1	0	0	0	0	0	0	0	1	1	0	1	1
ENSG00000015475	BID	527	389	444	515	339	299	404	310	526	479	338	345	391	398	372	308	329	563	345	495	648	674	478	468	687	603	548	494	608	570
ENSG00000015479	MATR3	14733	11389	12576	13831	10610	8257	10051	9505	15211	15039	10549	10687	11865	10810	10480	11517	10481	12237	12555	13819	21174	21921	15921	15296	18683	18658	16535	12135	18011	18163
ENSG00000015520	NPC1L1	18	6	8	3	10	7	7	6	11	7	8	13	15	9	12	4	8	11	4	10	5	14	16	4	26	5	7	6	7	11
ENSG00000015532	XYLT2	617	420	330	432	382	298	450	348	717	483	487	448	477	533	415	332	343	484	396	329	715	754	621	540	775	646	564	488	601	528
ENSG00000015568	RGPD5	2	1	3	1	4	1	5	3	5	4	5	2	5	0	1	5	1	2	2	1	2	5	2	1	4	4	6	0	0	0
ENSG00000015592	STMN4	15	8	22	16	15	7	9	20	19	25	15	7	11	9	10	6	3	10	5	15	14	18	15	7	19	12	8	17	10	14
ENSG00000015676	NUDCD3	2962	2145	2245	2507	1966	1490	2117	1785	3058	2895	2133	2048	2120	2257	2014	2055	1879	2668	2139	2398	3713	3831	3035	2732	4004	3499	3057	2771	3261	3314
ENSG00000016082	ISL1	14	8	8	7	4	5	4	8	14	7	3	9	4	9	6	12	6	16	7	6	15	9	6	15	11	6	5	18	11	5
ENSG00000016391	CHDH	2546	1886	1789	2106	1769	1165	1754	1618	2362	2478	1763	1698	1806	1892	1822	1548	1427	2010	1592	1793	2805	2864	2234	2141	2962	2618	2351	2162	2540	2506
ENSG00000016402	IL20RA	21	8	7	8	4	13	5	5	9	16	6	4	10	12	5	7	7	20	4	21	20	16	9	6	24	35	9	4	16	16
ENSG00000016490	CLCA1	1	0	0	0	0	0	1	0	0	1	0	0	0	0	0	0	0	0	0	0	0	0	0	0	0	0	0	0	0	0
ENSG00000016602	CLCA4	0	0	0	0	2	0	0	0	0	0	0	0	0	0	0	0	0	0	0	0	0	0	0	0	0	0	0	0	0	0
ENSG00000016864	GLT8D1	1309	980	1094	1165	987	699	876	860	1195	1317	849	879	1019	902	998	960	834	1154	957	1393	1889	1766	1271	1288	1844	1561	1332	1137	1559	1655
ENSG00000017260	ATP2C1	3326	2508	3110	2966	2434	1858	2135	2264	3284	3345	2354	2232	2820	2431	2375	2300	2161	3019	2435	3445	4472	4539	3962	3363	4691	3710	3302	2902	3675	4811
ENSG00000017427	IGF1	206	136	163	188	129	123	139	145	191	206	165	113	140	131	121	176	127	154	176	176	342	352	190	251	237	359	289	149	264	244
ENSG00000017483	SLC38A5	2	7	2	3	5	2	2	3	2	2	2	3	3	5	2	3	2	3	5	6	7	9	3	1	2	4	6	4	7	5
ENSG00000017797	RALBP1	2375	1877	1949	2185	1597	1298	1698	1474	2552	2329	1844	1771	1928	1870	1766	1880	1671	2149	1956	1920	3594	3672	2718	2675	3283	3193	2744	2214	3023	2808
ENSG00000018189	RUFY3	969	723	902	848	694	488	623	619	987	984	696	604	660	646	638	689	552	644	592	840	1152	1213	853	860	1143	1005	947	690	918	1073
ENSG00000018236	CNTN1	0	0	0	0	0	0	0	0	0	0	0	1	0	0	0	0	0	0	0	1	0	2	0	0	0	3	0	0	0	0
ENSG00000018280	SLC11A1	56	40	38	44	48	22	41	44	54	54	40	42	41	43	43	24	17	68	30	60	40	56	51	24	90	61	50	64	65	82
ENSG00000018408	WWTR1	63	42	69	61	36	35	36	57	48	53	50	63	56	29	37	61	47	50	53	34	102	105	58	50	39	82	65	41	66	35
ENSG00000018510	AGPS	1085	779	1001	1000	881	690	702	791	1088	1205	810	783	980	762	857	818	726	1033	914	1385	1638	1567	1295	1154	1675	1285	1208	1022	1243	1795
ENSG00000018607	ZNF806	14	14	13	14	16	3	6	6	11	11	12	10	10	6	14	5	10	10	7	20	12	22	16	11	31	11	7	13	19	33
ENSG00000018610	CXorf56	935	672	761	789	621	519	625	575	888	968	611	611	638	646	627	693	566	895	765	971	1263	1320	978	1000	1285	1058	1072	869	1120	1062
ENSG00000018625	ATP1A2	1	1	0	2	0	1	1	0	1	0	2	0	0	1	0	0	0	2	0	0	0	1	0	3	0	2	5	0	0	2
ENSG00000018699	TTC27	955	715	758	890	667	508	670	531	898	887	644	626	696	670	647	812	704	799	883	880	1442	1358	942	1034	1095	1196	1026	737	1227	1048
ENSG00000018869	ZNF582	230	146	199	178	178	95	145	146	218	234	119	132	165	155	138	118	114	173	121	209	225	302	208	163	298	220	195	164	224	287
ENSG00000019102	VSIG2	2	3	0	2	0	0	0	2	4	2	2	0	1	3	1	3	1	3	1	0	2	3	1	4	1	4	0	3	5	1
ENSG00000019144	PHLDB1	279	202	151	192	119	112	170	154	288	208	242	204	237	235	183	135	144	225	150	168	319	354	309	284	387	281	242	236	257	314
ENSG00000019169	MARCO	0	0	0	0	0	0	0	0	0	0	1	0	0	0	0	0	0	0	0	0	0	0	0	0	0	0	0	0	0	0
ENSG00000019186	CYP24A1	0	0	0	0	0	0	0	0	1	0	0	0	0	0	0	0	0	1	0	0	0	0	0	0	0	0	0	0	0	0
ENSG00000019485	PRDM11	114	74	63	96	62	60	78	50	106	118	82	88	75	72	62	53	44	75	52	69	102	100	71	70	112	99	67	82	92	107
ENSG00000019505	SYT13	3	5	2	3	2	0	3	1	1	2	1	1	1	0	3	0	1	2	4	3	3	1	3	2	5	1	2	0	0	3
ENSG00000019549	SNAI2	53	33	21	24	17	24	47	22	45	14	43	44	22	32	21	52	45	25	39	20	114	109	43	61	17	90	76	34	62	32
ENSG00000019582	CD74	1	1	2	0	2	1	2	1	2	4	0	0	0	0	1	2	2	0	1	0	1	0	0	0	1	0	0	1	0	0
ENSG00000019991	HGF	2	0	0	0	0	0	0	0	0	0	0	0	0	0	0	0	0	0	0	0	0	0	0	0	0	0	0	0	0	0
ENSG00000019995	ZRANB1	1107	798	976	994	835	580	748	788	1114	1105	734	733	889	785	754	770	657	921	882	1053	1524	1435	1148	1062	1556	1283	1159	1001	1224	1450
ENSG00000020129	NCDN	2953	2212	1856	2508	1983	1488	2119	1537	2956	2720	2094	1912	1722	2169	2082	1923	1718	2537	2068	2446	3583	3557	2948	2775	4457	3366	2974	2699	3312	3125
ENSG00000020181	ADGRA2	33	33	20	15	24	17	25	12	27	41	31	30	29	23	25	20	22	50	28	32	51	42	56	46	70	46	48	22	34	46
ENSG00000020219	CCT8L1P	2	0	1	2	0	2	0	3	0	1	0	0	0	0	0	0	0	0	0	1	0	1	0	0	0	1	0	0	0	1
ENSG00000020256	ZFP64	978	769	781	804	697	459	732	647	960	1001	619	704	720	672	664	618	570	814	681	755	1203	1183	891	903	1307	1049	966	880	1037	1040
ENSG00000020426	MNAT1	532	378	472	516	405	285	353	373	561	536	369	356	469	388	350	397	345	484	436	606	834	790	626	611	750	617	535	466	666	807
ENSG00000020577	SAMD4A	40	57	46	39	45	32	41	32	43	55	23	26	49	42	36	27	17	41	28	52	44	37	60	30	74	23	31	49	37	82
ENSG00000020633	RUNX3	7	0	0	2	0	0	0	0	2	0	1	0	1	0	0	0	0	0	0	0	0	0	0	0	1	0	0	1	0	1
ENSG00000020922	MRE11	926	690	805	937	677	521	629	651	960	972	612	642	807	672	649	817	690	800	924	885	1604	1596	1020	1155	1154	1322	1180	722	1229	1261
ENSG00000021300	PLEKHB1	6167	4434	4664	5174	4166	3015	4251	3703	5721	5770	3811	4007	4266	4106	4384	2573	2477	4973	3241	5020	4838	5124	4851	3889	7542	4680	4508	4711	4838	5710
ENSG00000021355	SERPINB1	1	0	1	0	1	0	0	0	0	0	0	0	0	0	0	2	2	0	0	0	0	1	0	0	0	1	0	0	0	0
ENSG00000021461	CYP3A43	11	8	15	7	7	6	14	8	12	10	8	1	5	4	3	5	5	4	5	17	18	7	13	10	17	12	6	5	16	8
ENSG00000021488	SLC7A9	22	17	14	25	14	10	13	14	28	17	26	11	5	13	10	9	11	11	3	11	9	9	22	10	26	10	18	10	8	11
ENSG00000021574	SPAST	944	697	793	852	666	517	673	563	925	952	591	683	688	688	655	599	555	731	689	912	1172	1189	899	829	1065	915	787	749	879	1218
ENSG00000021645	NRXN3	8	2	6	6	7	4	7	7	4	15	6	3	11	7	3	10	4	5	5	9	8	12	17	5	7	3	9	4	11	4
ENSG00000021762	OSBPL5	1868	1379	1130	1470	1117	878	1301	1034	2097	1785	1462	1556	1325	1648	1396	1254	1190	1600	1309	1085	2595	2384	1913	1906	2300	2386	1863	1600	2066	1624
ENSG00000021776	AQR	2888	2221	2645	2881	2316	1622	2091	1973	2997	3197	2096	2081	2492	2120	2060	2208	2104	2343	2505	3061	4264	4402	3345	2930	3726	3582	3187	2284	3317	3926
ENSG00000021826	CPS1	549	378	519	488	430	250	383	394	513	630	355	365	472	418	414	358	316	539	378	685	649	563	691	460	924	577	481	604	591	903
ENSG00000021852	C8B	4	0	0	0	0	0	0	0	0	1	0	0	0	0	0	0	0	0	0	0	0	0	0	0	1	0	0	0	0	0
ENSG00000022267	FHL1	2	0	0	1	0	0	0	0	1	0	0	0	0	0	0	0	1	0	1	2	4	0	0	1	0	0	1	3	2	0
ENSG00000022277	RTF2	1678	1279	1310	1386	1135	827	1173	1070	1552	1514	1100	1209	1272	1187	1125	1085	1054	1590	1304	1525	2056	2100	1527	1520	2319	1940	1743	1448	1875	2019
ENSG00000022355	GABRA1	2	1	0	1	0	1	0	0	0	1	2	0	0	0	1	0	1	0	0	0	0	0	0	0	0	0	1	0	0	0
ENSG00000022556	NLRP2	1429	957	968	1189	857	709	983	727	1356	1251	926	936	918	1088	951	919	754	1137	1023	1027	1632	1697	1189	1208	1722	1520	1365	1150	1502	1479
ENSG00000022567	SLC45A4	566	438	394	451	356	302	370	321	565	512	419	412	416	393	380	306	303	386	339	464	622	554	523	478	726	526	496	424	512	568
ENSG00000022840	RNF10	7667	5435	5817	6443	5337	3715	5373	4730	7133	7543	5054	4913	5358	5431	5450	4611	4207	6500	5013	6791	8443	8605	7402	6249	10880	7839	6890	6929	7822	8545
ENSG00000022976	ZNF839	919	671	715	751	616	501	638	606	923	831	631	559	579	596	616	538	476	713	591	745	1009	1001	804	773	1199	890	869	752	875	960
ENSG00000023041	ZDHHC6	1424	1103	1135	1400	990	781	1026	835	1375	1303	1002	1002	992	1038	894	1146	1087	1328	1258	1384	2240	2151	1463	1572	1773	1851	1743	1226	1798	1669
ENSG00000023171	GRAMD1B	1	3	4	0	1	0	0	3	3	1	0	0	0	0	3	0	0	1	0	0	1	0	0	0	1	0	0	0	0	0
ENSG00000023191	RNH1	2536	1827	1735	2061	1577	1191	1853	1464	2369	2263	1658	1671	1577	1737	1784	1655	1439	2455	1766	1945	3074	3133	2424	2407	3375	3154	2677	2282	2874	2446
ENSG00000023228	NDUFS1	6160	4473	4951	5222	4183	3162	4066	3778	5756	6018	4148	4147	4557	4325	4224	4298	3796	5107	4509	5718	7836	8051	5876	5615	7988	7021	6248	5103	6802	6948
ENSG00000023287	RB1CC1	1544	1149	1605	1475	1329	956	1077	1130	1535	1843	1087	1082	1456	1070	1262	1171	1129	1337	1314	2028	2338	2362	1985	1670	2461	1718	1678	1326	1688	2805
ENSG00000023318	ERP44	1685	1307	1510	1576	1283	965	1147	1159	1722	1773	1275	1270	1453	1231	1313	1407	1253	1705	1503	1934	2759	2736	2013	1903	2376	2064	1887	1554	2045	2637
ENSG00000023330	ALAS1	3318	2422	2720	2711	2127	1616	2353	2439	3027	3057	2086	2184	2617	2292	2234	1894	1780	2904	2028	2516	3373	3550	3177	2573	3819	3132	2896	2877	3162	3159
ENSG00000023445	BIRC3	93	75	95	101	92	61	68	68	93	99	68	62	74	70	73	74	49	88	84	153	144	129	123	90	142	103	119	79	108	163
ENSG00000023516	AKAP11	3922	3031	3626	3817	3039	2194	2656	2566	4151	4212	2832	2764	3282	2769	2759	2787	2531	2926	3023	4062	5399	5383	4604	3730	5176	4326	3800	3172	4090	5413
ENSG00000023572	GLRX2	436	363	416	496	365	313	349	288	443	417	332	364	390	356	307	426	406	472	465	400	984	957	432	628	433	718	544	329	567	515
ENSG00000023608	SNAPC1	191	156	169	167	163	132	137	134	208	197	141	145	177	142	133	148	140	157	150	175	290	287	176	185	247	276	224	152	242	229
ENSG00000023697	DERA	699	583	678	681	573	410	545	491	712	815	512	530	580	561	555	484	489	711	627	728	998	1088	774	739	971	868	841	613	885	1003
ENSG00000023734	STRAP	5221	4036	4443	5090	3879	3057	3531	3213	5390	5525	3660	3934	4199	3960	3668	4003	3706	4833	4647	5735	8161	7966	6004	5874	7550	6560	6014	4713	6505	7444
ENSG00000023839	ABCC2	10	6	17	9	12	5	5	12	9	15	14	7	7	12	15	8	10	7	9	7	10	20	10	16	22	18	9	5	18	13
ENSG00000023892	DEF6	415	327	234	325	211	216	264	210	433	361	337	279	263	338	291	218	209	286	238	194	410	384	315	306	431	441	321	308	373	316
ENSG00000023902	PLEKHO1	50	33	33	55	28	35	37	35	53	44	31	55	36	47	36	51	29	46	31	44	53	79	57	49	78	60	41	71	78	57
ENSG00000023909	GCLM	1141	910	1033	1096	936	711	796	868	1127	1322	766	811	1004	867	867	681	661	1122	772	1118	1430	1432	1179	995	1598	1056	993	1051	1050	1594
ENSG00000024048	UBR2	1382	1005	1151	1252	1126	752	909	946	1532	1485	987	993	1165	1056	1013	936	858	1096	990	1433	1847	1829	1455	1223	1875	1496	1221	1051	1414	1879
ENSG00000024422	EHD2	4	0	0	0	0	1	0	0	1	0	0	0	1	0	0	0	0	0	0	0	1	1	2	0	1	3	0	0	0	0
ENSG00000024526	DEPDC1	924	659	753	839	623	559	538	498	934	738	683	654	696	633	475	955	857	659	959	907	1961	1801	918	1357	897	1416	1184	521	1154	1269
ENSG00000024862	CCDC28A	179	112	162	138	129	113	109	129	183	216	140	128	173	121	167	128	122	171	140	216	229	266	202	209	251	178	199	167	189	290
ENSG00000025039	RRAGD	329	240	367	332	268	183	206	238	286	348	219	234	280	213	224	223	217	331	217	398	442	437	398	300	490	357	309	329	338	472
ENSG00000025156	HSF2	472	382	379	476	367	302	325	299	484	502	354	330	400	333	329	404	356	476	437	486	771	800	540	523	631	590	541	364	611	683
ENSG00000025293	PHF20	3569	2726	3019	3367	2703	1865	2580	2357	3774	3726	2571	2479	2863	2764	2591	2512	2195	3012	2643	3221	4726	4851	3675	3426	4772	4043	3830	3226	4013	4028
ENSG00000025423	HSD17B6	19	21	22	19	15	18	21	23	25	21	19	17	20	14	20	29	17	34	20	22	56	34	34	33	41	45	29	32	43	41
ENSG00000025434	NR1H3	513	345	314	411	333	294	353	297	538	449	370	376	302	375	356	310	309	524	365	370	667	657	493	466	634	562	533	432	552	461
ENSG00000025708	TYMP	254	180	154	130	151	129	202	149	234	222	198	205	174	197	168	94	118	243	118	167	206	251	252	148	393	237	198	262	235	261
ENSG00000025770	NCAPH2	1228	891	882	1023	810	576	929	783	1204	1202	908	874	847	1008	898	902	840	1118	974	852	1758	1822	1215	1355	1716	1781	1563	1212	1738	1295
ENSG00000025772	TOMM34	1980	1473	1320	1680	1199	987	1296	1089	1837	1830	1281	1406	1121	1454	1238	1440	1282	1756	1462	1553	2522	2791	1743	1910	2339	2569	2365	1616	2497	2012
ENSG00000025796	SEC63	2915	2239	2383	2621	2140	1609	1979	2073	3422	3080	2356	2293	2863	2257	2103	2314	2247	2982	2541	3131	4822	4664	4267	3350	5025	3787	3333	2892	3457	5011
ENSG00000025800	KPNA6	5504	4161	3983	4815	3516	2825	3870	3224	5210	5302	3896	3660	3972	3994	3779	3944	3395	4342	4140	4703	7118	6869	5281	5315	7081	6189	5732	4322	6135	6002
ENSG00000026025	VIM	340	244	291	259	251	173	237	198	325	373	219	201	254	220	253	173	159	368	198	365	309	318	438	283	497	282	313	395	350	436
ENSG00000026036	RTEL1-TNFRSF6B	39	43	33	51	32	35	30	28	49	34	36	28	31	28	34	22	21	37	42	24	49	41	34	38	42	72	61	38	40	28
ENSG00000026103	FAS	199	124	181	196	151	94	139	112	169	198	125	144	151	134	131	121	97	159	139	192	231	228	218	154	198	173	159	121	174	230
ENSG00000026297	RNASET2	632	480	337	502	424	305	390	437	600	527	415	434	427	426	389	365	330	564	397	421	690	637	550	489	798	702	599	602	610	538
ENSG00000026508	CD44	3	1	4	6	6	1	2	1	1	7	3	1	3	4	3	3	0	3	1	8	0	4	4	2	6	2	0	3	1	7
ENSG00000026559	KCNG1	192	174	190	171	147	70	150	126	189	213	132	147	179	155	169	107	99	284	122	290	214	215	301	160	516	192	189	325	210	357
ENSG00000026652	AGPAT4	5	4	3	2	0	2	2	0	2	2	1	1	1	0	0	0	4	0	1	1	2	0	2	1	2	0	1	2	1	2
ENSG00000026751	SLAMF7	3	0	0	0	0	0	0	0	0	0	0	0	0	0	0	1	0	0	0	0	0	0	1	0	0	1	0	0	0	0
ENSG00000026950	BTN3A1	221	161	165	227	172	119	175	149	210	258	159	149	154	147	161	150	143	182	142	203	252	254	257	206	355	253	222	224	204	341
ENSG00000027001	MIPEP	1331	963	1034	1092	874	656	904	796	1206	1238	905	902	944	980	883	880	846	1004	829	1091	1558	1652	1067	1142	1321	1439	1288	965	1368	1299
ENSG00000027075	PRKCH	497	422	512	452	359	274	370	431	505	567	407	395	417	344	339	418	342	405	354	522	685	732	604	496	822	654	524	557	564	663
ENSG00000027644	INSRR	4	0	0	0	0	0	0	1	1	0	0	0	0	0	0	0	0	0	0	0	0	1	0	0	0	0	0	0	0	0
ENSG00000027697	IFNGR1	574	462	585	510	443	349	378	413	609	677	428	391	560	387	430	388	388	573	424	660	826	793	657	556	795	677	581	485	651	839
ENSG00000027847	B4GALT7	803	552	544	604	479	401	547	437	801	627	504	527	521	502	516	427	425	711	494	590	834	931	670	695	976	849	826	688	769	747
ENSG00000027869	SH2D2A	5	1	1	0	2	3	0	0	2	3	1	1	2	1	0	0	0	5	1	2	4	0	4	6	8	3	2	0	6	1
ENSG00000028116	VRK2	472	377	409	418	351	236	362	288	435	464	317	325	390	338	328	300	345	395	418	510	674	675	535	483	583	525	484	385	519	656
ENSG00000028137	TNFRSF1B	5	1	1	1	0	0	3	1	1	3	0	3	0	6	0	4	2	4	4	1	3	5	0	0	5	5	2	2	2	2
ENSG00000028203	VEZT	3375	2459	3064	2928	2502	1868	2301	2343	3245	3522	2269	2340	2807	2229	2319	2153	1981	2843	2406	3309	3862	4244	3676	2819	4565	3421	3293	2709	3563	4245
ENSG00000028277	POU2F2	9	1	12	2	4	4	2	3	7	3	3	5	3	2	4	0	2	8	4	2	8	6	2	3	10	9	4	2	3	5
ENSG00000028310	BRD9	1255	940	826	988	761	639	840	845	1583	950	1007	994	1034	1028	779	779	602	1008	884	815	1556	1575	1274	1171	1592	1385	1274	1070	1225	1069
ENSG00000028528	SNX1	3883	2939	3340	3510	2895	2028	2856	2661	3982	3991	2762	2816	2844	2986	2886	2252	2027	3399	2590	3415	4303	4190	3588	3106	5321	3953	3476	3340	3808	4377
ENSG00000028839	TBPL1	589	483	529	638	444	405	439	421	665	580	460	458	552	385	360	530	490	642	605	682	1072	1039	669	724	732	822	744	536	713	869
ENSG00000029153	ARNTL2	553	353	476	500	394	319	364	324	470	486	383	366	394	352	356	488	454	461	485	592	952	928	587	641	676	713	644	428	673	761
ENSG00000029363	BCLAF1	9613	7372	8428	8980	7171	5536	6426	6263	9890	10256	6879	6873	8184	6957	6771	7166	6698	7627	7772	9024	13230	14220	10359	9577	12197	11670	10600	7413	11450	12059
ENSG00000029364	SLC39A9	6544	4960	5336	5950	4732	3564	4333	4038	6349	6511	4573	4501	4921	4473	4549	4410	4226	5571	4925	6874	8694	8339	6627	6268	9058	6969	6183	5124	7024	8988
ENSG00000029534	ANK1	26	16	14	17	7	11	14	15	33	25	20	16	17	17	18	12	7	20	8	17	26	32	30	22	19	24	17	22	34	13
ENSG00000029559	IBSP	0	0	1	0	0	0	0	0	2	0	0	0	0	0	0	0	0	0	0	0	0	0	0	0	0	1	0	0	0	0
ENSG00000029639	TFB1M	276	266	254	270	236	167	215	200	283	357	217	195	248	207	200	247	214	258	239	301	399	423	309	277	404	368	327	264	336	401
ENSG00000029725	RABEP1	3904	2948	3240	3697	2723	2068	2716	2471	4066	3899	2835	2898	3228	3047	2750	2824	2638	3391	2998	3104	5399	5631	4233	3817	4871	5097	4459	3284	4692	4429
ENSG00000029993	HMGB3	1244	876	838	1015	737	604	770	662	1195	948	750	853	789	883	749	824	752	921	857	910	1471	1618	995	1128	1439	1523	1299	976	1466	1190
ENSG00000030066	NUP160	4152	3124	3256	3714	2733	2335	2764	2527	3910	3756	2896	2824	2896	3006	2713	3190	2850	3107	3239	2996	5930	5864	3888	3998	4167	5140	4395	3095	4881	3951
ENSG00000030110	BAK1	880	581	500	605	487	431	548	388	732	715	486	531	471	538	502	479	450	682	540	581	877	999	658	705	847	853	736	686	830	717
ENSG00000030304	MUSK	1	0	0	0	1	0	0	0	0	0	0	0	0	0	0	0	0	0	1	0	0	0	0	0	1	0	0	0	0	0
ENSG00000030419	IKZF2	97	55	94	77	86	50	47	82	107	112	62	69	106	59	99	60	57	92	67	120	111	97	149	91	155	88	90	79	70	124
ENSG00000030582	GRN	1929	1439	1547	1546	1330	930	1444	1291	1772	2035	1244	1244	1329	1370	1431	984	974	1606	1127	1719	1701	1834	1659	1378	2709	1806	1574	1632	1854	1893
ENSG00000031003	FAM13B	2465	1820	2068	2332	1790	1353	1744	1558	2611	2473	1712	1651	1964	1755	1589	1696	1571	2057	1987	2717	3392	3364	2764	2459	3296	2669	2434	2048	2683	3584
ENSG00000031081	ARHGAP31	44	44	27	60	33	22	29	30	55	45	31	27	18	33	34	16	24	27	20	34	28	21	29	26	53	39	25	23	40	22
ENSG00000031691	CENPQ	157	159	153	170	136	104	143	100	190	204	114	148	141	128	151	174	174	210	204	161	372	398	217	278	199	295	290	130	268	322
ENSG00000031698	SARS	4813	3588	5230	4110	4261	2467	3342	4154	4534	6401	3270	3454	5093	3646	4838	3732	3452	8236	4222	7855	6722	7312	8565	5363	14023	6537	6272	8228	6721	10841
ENSG00000031823	RANBP3	3041	2075	2046	2504	1918	1452	2164	1629	2870	2781	2070	2046	1916	2059	2014	2010	1883	2458	2171	2239	3700	3821	2765	2770	3638	3717	3242	2605	3363	2762
ENSG00000032219	ARID4A	575	437	513	540	441	348	415	467	720	597	500	487	533	449	388	357	373	509	459	523	778	807	737	625	780	597	594	486	614	764
ENSG00000032389	EIPR1	965	751	743	816	625	475	691	561	909	881	599	702	675	707	683	656	546	931	656	840	1149	1193	906	852	1236	1089	961	929	1031	1124
ENSG00000032444	PNPLA6	1690	1181	1115	1248	1088	807	1108	980	1719	1619	1336	1250	1269	1318	1229	1102	971	1384	1156	1234	2065	1902	1661	1594	2470	1912	1608	1550	1854	1757
ENSG00000032742	IFT88	585	368	474	517	455	343	351	368	600	596	392	391	463	403	404	394	356	475	422	611	717	785	633	481	734	580	593	424	614	749
ENSG00000033011	ALG1	1935	1394	1304	1589	1168	932	1365	1125	1764	1699	1344	1285	1172	1427	1263	1214	1125	1634	1273	1358	2155	2318	1537	1633	2224	2071	1869	1643	1924	1617
ENSG00000033030	ZCCHC8	954	700	892	872	783	516	677	680	970	1058	679	687	750	584	677	716	562	905	703	1076	1339	1295	1127	919	1485	1174	1071	966	1214	1368
ENSG00000033050	ABCF2	4245	3062	2699	3524	2486	2142	3001	2156	4089	3657	2967	2975	2734	3269	2823	3276	2765	3649	3405	3184	5879	5958	3850	4361	4971	5522	4750	3716	5254	4120
ENSG00000033100	CHPF2	1537	1155	1213	1372	1027	808	1056	1010	1469	1483	1151	1053	936	1102	1043	841	691	1311	850	1195	1512	1521	1551	1148	1986	1455	1223	1405	1312	1484
ENSG00000033122	LRRC7	97	54	76	75	87	40	47	53	81	97	45	50	78	33	82	20	21	56	42	101	71	65	78	65	133	60	43	72	44	112
ENSG00000033170	FUT8	668	497	565	595	592	394	479	509	705	785	454	444	558	454	545	414	407	607	473	769	828	797	794	528	1050	703	669	556	699	972
ENSG00000033178	UBA6	2012	1665	1901	2240	1844	1342	1478	1326	2410	2217	1609	1601	1847	1567	1408	1855	1773	1852	2204	2738	4058	3957	2778	2784	2702	2760	2505	1697	2564	3527
ENSG00000033327	GAB2	54	34	29	51	25	16	29	40	56	34	40	45	51	34	38	26	22	42	44	30	40	53	53	42	56	33	43	44	29	51
ENSG00000033627	ATP6V0A1	2130	1692	1751	1912	1529	1128	1519	1389	2065	2145	1522	1481	1523	1640	1555	1293	1093	1620	1359	2016	2246	2151	2125	1754	2932	1904	1797	1768	1793	2391
ENSG00000033800	PIAS1	1489	1110	1190	1236	997	812	989	935	1493	1471	1026	956	1100	985	922	1163	965	1141	1168	1285	1876	2049	1383	1240	1857	1814	1623	1091	1676	1602
ENSG00000033867	SLC4A7	2617	2051	2237	2469	1948	1632	1890	1612	2832	2650	1882	1857	1895	1899	1791	2251	1995	2011	2389	2669	4463	4209	3054	3080	3180	3427	2982	2062	3168	3575
ENSG00000034053	APBA2	1816	1384	1231	1594	1135	900	1326	1050	1827	1655	1250	1310	1261	1391	1311	1171	1059	1578	1308	1377	2207	2236	1775	1675	2415	2023	1814	1657	2049	1781
ENSG00000034152	MAP2K3	3648	2698	2552	3050	2490	1850	2657	2123	3481	3640	2481	2486	2489	2760	2720	2245	2102	2930	2438	2867	3961	4164	3026	3071	4481	3814	3444	3035	3850	3443
ENSG00000034239	EFCAB1	1	0	0	0	0	0	0	0	0	0	0	0	0	0	0	0	0	0	0	0	0	0	0	0	0	0	0	0	0	0
ENSG00000034510	TMSB10	5462	4003	4245	4438	3490	2819	3722	3579	4708	4798	3352	3633	3652	3800	3703	3807	3332	6200	4230	5571	6310	7299	5170	5013	9656	6605	6183	6340	6924	7199
ENSG00000034533	ASTE1	431	320	338	380	321	236	282	281	370	387	314	246	297	294	276	319	295	339	327	368	657	658	399	427	534	512	440	388	470	483
ENSG00000034677	RNF19A	850	658	926	876	918	490	593	750	937	1242	615	652	875	651	788	539	513	919	696	1309	1153	1101	1199	884	1830	817	839	897	895	1940
ENSG00000034693	PEX3	402	332	352	403	306	225	315	269	415	378	322	299	330	336	267	312	267	353	333	395	561	589	423	367	492	495	461	339	504	537
ENSG00000034713	GABARAPL2	1642	1187	1293	1486	1196	823	1160	1041	1423	1667	1061	1170	1170	1181	1198	993	962	1527	1139	1677	1929	2098	1552	1605	2406	1754	1598	1493	1809	2238
ENSG00000034971	MYOC	2	0	0	0	0	0	0	0	0	0	0	0	0	0	0	0	0	0	0	0	0	0	0	0	0	0	0	0	0	0
ENSG00000035115	SH3YL1	357	296	308	337	291	218	258	303	395	370	276	292	341	280	226	222	203	297	233	344	479	440	476	377	545	364	353	316	324	440
ENSG00000035141	FAM136A	1829	1384	1391	1648	1178	975	1370	1012	1771	1739	1360	1421	1224	1221	1118	1400	1292	1669	1446	1465	2603	2876	1737	1983	2017	2145	1968	1352	2197	1774
ENSG00000035403	VCL	7540	5517	4952	6127	4579	3808	4963	4112	7162	6592	5094	4825	4774	5337	4710	4910	4060	5495	4734	5341	8628	8296	6372	6192	8059	7495	6664	5476	6860	6406
ENSG00000035499	DEPDC1B	1460	1162	1250	1398	1133	849	1039	833	1501	1403	1067	1037	1082	1033	1023	1500	1333	1253	1626	1384	2724	2745	1510	2004	1853	2351	2153	1288	2407	1741
ENSG00000035664	DAPK2	249	158	198	228	242	124	158	189	240	277	155	147	194	200	205	82	89	239	127	235	194	184	269	136	420	136	143	215	167	299
ENSG00000035681	NSMAF	1605	1165	1226	1340	916	857	1074	945	1481	1356	1047	1015	1123	1010	970	1310	1088	1213	1160	1144	2287	2422	1456	1485	1683	2085	1654	1239	1779	1497
ENSG00000035687	ADSS	1265	905	1023	1286	992	736	848	831	1326	1196	883	897	979	989	846	1069	1086	1038	1170	1308	2097	2186	1397	1498	1514	1586	1401	1108	1736	1532
ENSG00000035720	STAP1	0	0	0	0	0	0	0	1	0	0	0	1	1	0	0	0	0	0	1	0	0	0	0	0	0	0	0	1	0	0
ENSG00000035862	TIMP2	938	746	724	886	764	474	699	580	918	1007	676	649	697	730	752	463	456	781	587	1196	854	884	1088	755	1805	771	782	958	956	1416
ENSG00000035928	RFC1	4561	3454	3628	4111	3044	2443	3099	2652	4458	4394	3187	3161	3527	3281	2898	3695	3378	3678	3859	3785	6803	7217	4800	4563	5329	6005	5426	3702	5945	4910
ENSG00000036054	TBC1D23	719	532	726	693	590	417	476	533	726	824	496	541	672	525	564	551	520	717	673	924	1100	1238	846	832	1088	921	801	596	936	1397
ENSG00000036257	CUL3	2374	1810	1939	2228	1805	1278	1593	1474	2393	2363	1610	1695	1917	1706	1687	1909	1743	2066	2031	2562	4018	3707	2596	2718	3169	2893	2594	2025	2809	3638
ENSG00000036448	MYOM2	7	2	3	2	3	6	3	5	7	3	3	7	8	3	1	4	5	5	3	5	8	4	6	2	12	4	7	9	6	11
ENSG00000036473	OTC	1	0	0	0	0	0	0	0	0	0	0	0	0	0	0	0	0	0	0	0	0	0	0	0	0	0	0	0	0	0
ENSG00000036530	CYP46A1	111	61	76	92	78	52	53	54	93	74	53	61	48	44	45	45	24	53	26	49	59	55	70	44	109	43	40	47	58	90
ENSG00000036549	AC118549.1	3058	2382	2721	2814	2341	1724	2159	2050	3186	3191	2063	2084	2680	2080	2199	2264	2054	2673	2493	3218	4172	4644	3452	3107	4205	3678	3301	2612	3412	4174
ENSG00000036565	SLC18A1	2	0	0	0	0	0	0	0	0	0	0	0	0	0	0	0	0	0	0	0	0	0	0	0	0	0	0	0	0	0
ENSG00000036672	USP2	524	379	330	468	352	260	322	305	478	470	347	367	346	397	346	310	260	394	317	398	506	574	471	410	654	545	461	430	533	493
ENSG00000036828	CASR	0	0	2	1	0	0	0	0	0	0	0	1	0	0	0	1	0	1	0	0	1	1	1	0	0	2	0	0	1	0
ENSG00000037042	TUBG2	519	392	419	455	360	295	376	348	510	516	391	339	333	324	308	288	231	474	293	423	490	505	484	411	729	484	458	492	418	584
ENSG00000037241	RPL26L1	1554	1107	1226	1202	920	800	1005	900	1462	1408	983	946	1075	1027	1063	1088	944	1567	1170	1341	1912	2068	1188	1557	1829	1922	1719	1197	1943	1602
ENSG00000037280	FLT4	96	42	47	56	28	32	48	32	61	52	36	50	46	42	53	22	25	67	40	66	64	73	64	68	106	89	66	71	73	53
ENSG00000037474	NSUN2	4693	3614	3213	4062	3031	2499	3235	2557	4762	4369	3404	3304	3163	3600	3051	3802	3193	3680	3815	3493	6989	6851	4532	4805	5338	6159	5322	3926	5916	4319
ENSG00000037637	FBXO42	1324	974	1100	1186	1017	712	998	921	1319	1359	954	945	1037	939	979	865	742	1209	878	1336	1645	1613	1389	1109	1908	1422	1252	1234	1304	1584
ENSG00000037749	MFAP3	2301	1830	2061	2288	1787	1427	1646	1500	2557	2604	1674	1688	2026	1789	1596	1715	1598	1925	1924	2571	3444	3442	2598	2363	3151	2606	2446	1823	2621	3378
ENSG00000037757	MRI1	1087	827	729	906	659	516	728	597	1050	998	703	751	614	717	669	620	513	809	571	705	1136	1094	838	797	999	1069	820	837	935	717
ENSG00000037897	METTL1	734	473	529	572	418	381	488	374	551	560	504	484	431	427	422	484	442	656	502	482	877	865	570	673	734	937	798	600	806	604
ENSG00000037965	HOXC8	6	1	6	1	3	0	2	2	5	1	2	2	3	1	3	0	3	7	3	7	4	0	7	2	16	3	7	13	4	6
ENSG00000038002	AGA	498	374	429	478	396	248	322	317	455	493	326	362	401	314	385	319	297	538	403	618	557	618	554	493	895	527	479	474	556	902
ENSG00000038210	PI4K2B	772	620	712	813	626	489	604	534	816	808	566	550	638	575	621	637	645	729	705	823	1363	1320	952	982	989	1064	949	713	998	1131
ENSG00000038219	BOD1L1	2210	1715	1599	1837	1379	1150	1430	1593	2857	2110	2005	1925	2344	2059	1636	1425	1358	1666	1429	1304	3030	3006	2775	2008	3039	2583	2199	1924	2137	2490
ENSG00000038274	MAT2B	954	677	796	801	753	557	640	578	926	989	667	648	809	691	684	755	680	862	781	916	1435	1436	941	1067	1157	1124	1018	757	1107	1219
ENSG00000038295	TLL1	22	5	12	12	7	6	18	5	25	26	14	8	19	10	16	15	10	18	12	26	16	36	31	18	33	25	18	16	24	31
ENSG00000038358	EDC4	1939	1406	1287	1568	1261	880	1352	1110	1848	1731	1353	1315	1252	1353	1288	1214	1080	1457	1254	1250	2098	2179	1654	1577	2243	2123	1859	1516	1953	1547
ENSG00000038382	TRIO	4689	3391	3662	4048	3205	2428	3358	3187	5015	4657	3380	3295	3483	3615	3401	3235	2565	3279	2982	3509	5817	5583	4801	4030	5804	5053	4438	4003	4671	4613
ENSG00000038427	VCAN	4	0	0	0	0	0	0	0	0	1	0	0	0	0	0	0	0	0	0	0	0	0	0	0	0	0	2	0	0	0
ENSG00000038532	CLEC16A	1768	1366	1226	1510	1203	896	1230	1060	1846	1652	1247	1166	1218	1393	1279	1159	985	1316	1201	1460	2053	2000	1805	1534	2330	1978	1785	1410	1811	1833
ENSG00000038945	MSR1	2	0	0	0	2	1	0	0	1	0	0	1	0	1	1	0	0	0	0	0	0	0	0	1	1	1	0	1	2	0
ENSG00000039068	CDH1	22181	16436	17420	19204	15978	10996	15580	13764	21291	22149	14859	14419	15519	16251	15838	12941	11162	17814	13677	20256	24146	23192	21532	17254	29484	19953	18625	18043	19524	23531
ENSG00000039123	MTREX	2480	1850	2053	2390	1764	1487	1730	1518	2691	2425	1795	1795	1955	1711	1766	2065	1845	2023	2353	2751	4087	4154	2791	2985	3353	3242	2924	1966	3077	3681
ENSG00000039139	DNAH5	808	627	631	716	542	505	513	530	842	789	574	548	616	518	518	600	428	478	477	634	1038	954	685	647	856	947	794	540	664	820
ENSG00000039319	ZFYVE16	2210	1738	2022	1965	1562	1248	1464	1310	2212	2098	1652	1655	1838	1479	1311	1605	1590	1470	1812	2025	3145	3309	2401	2291	2241	2511	2155	1415	2271	2862
ENSG00000039523	RIPOR1	3021	2272	2066	2412	1955	1374	2099	1710	3006	2793	2123	1981	1993	2200	2200	2118	1706	2083	2076	2086	3489	3602	2711	2613	3536	3350	3085	2480	3282	2577
ENSG00000039537	C6	1	0	0	0	0	0	0	0	0	1	0	0	0	0	0	1	0	0	0	0	0	0	2	0	0	0	0	0	1	0
ENSG00000039560	RAI14	1741	1330	1352	1504	1093	868	1227	1036	1801	1610	1178	1210	1243	1266	1118	1140	992	1404	1170	1356	2043	2195	1844	1439	1937	1847	1707	1369	1880	1679
ENSG00000039600	SOX30	1	0	0	0	1	0	0	0	1	0	0	0	0	0	0	0	0	0	0	0	0	0	0	0	1	0	0	0	0	0
ENSG00000039650	PNKP	1054	748	736	888	644	498	699	719	1106	964	865	690	806	727	711	596	554	797	638	717	1121	1067	1038	892	1313	1204	908	999	1000	934
ENSG00000039987	BEST2	4	0	1	0	0	2	1	0	1	1	0	1	2	2	1	0	0	0	0	0	1	1	3	2	0	1	1	0	0	1
ENSG00000040199	PHLPP2	1912	1494	1498	1710	1313	1074	1382	1226	1874	1864	1354	1381	1347	1361	1294	1310	1108	1338	1305	1512	2405	2337	1743	1630	1998	2020	1791	1309	1883	1847
ENSG00000040275	SPDL1	1259	940	972	1115	795	724	794	681	1233	1130	858	886	946	837	746	1076	1008	964	1236	1086	2136	2151	1320	1549	1299	1751	1641	950	1790	1474
ENSG00000040341	STAU2	1108	905	1077	1011	899	604	836	770	1172	1333	777	836	984	777	851	698	720	975	826	1398	1403	1429	1252	1109	1813	1182	1166	976	1259	1802
ENSG00000040487	PQLC2	272	190	189	243	186	148	190	169	290	266	187	218	188	208	172	152	140	244	189	187	297	289	242	213	358	278	249	293	277	277
ENSG00000040531	CTNS	535	426	472	505	419	290	428	337	569	468	391	424	412	404	336	358	303	483	344	465	650	694	516	446	643	633	512	496	611	559
ENSG00000040608	RTN4R	247	165	175	182	179	101	169	143	220	257	137	137	148	169	184	176	126	234	165	299	272	290	235	190	448	266	225	254	218	303
ENSG00000040633	PHF23	2429	1818	1592	2050	1399	1154	1929	1376	2469	1993	1676	1873	1694	1996	1592	1461	1382	2107	1683	1755	2805	2894	2041	2153	3085	2574	2352	2057	2478	2240
ENSG00000040731	CDH10	3	0	0	0	0	0	0	0	0	0	0	0	0	0	0	0	0	0	0	0	0	0	0	0	0	0	0	0	0	0
ENSG00000040933	INPP4A	938	729	830	798	717	471	672	650	1076	1026	678	679	730	746	724	582	509	780	580	766	1048	1084	918	790	1280	963	812	800	871	1011
ENSG00000041353	RAB27B	369	291	353	369	355	230	211	254	404	486	266	237	330	247	355	258	199	269	274	440	498	518	386	361	523	370	353	268	350	642
ENSG00000041357	PSMA4	5192	4092	4472	4872	3887	3138	3418	3050	5388	5078	3506	3809	4342	3723	3588	4152	4018	5144	4893	5437	8426	8346	5534	6009	6882	6673	5935	4008	6716	7251
ENSG00000041515	MYO16	2	0	0	0	0	1	0	0	1	0	0	0	0	0	1	0	0	0	0	1	0	0	0	0	0	0	0	0	0	0
ENSG00000041802	LSG1	4300	3133	3031	3879	2794	2241	2906	2568	4089	3905	2847	2869	2822	3045	2814	2973	2501	3540	3054	3295	5450	5609	3865	3770	4935	4797	4422	3509	4727	4143
ENSG00000041880	PARP3	456	380	387	388	337	229	306	303	463	468	311	329	337	308	377	219	236	475	251	539	402	439	514	349	932	401	422	501	479	675
ENSG00000041982	TNC	17	7	8	8	7	3	12	6	9	4	4	4	3	7	6	7	0	4	7	11	12	18	10	3	5	6	10	9	9	12
ENSG00000041988	THAP3	518	414	357	431	327	279	364	323	458	503	299	318	355	348	315	318	331	536	350	427	620	623	391	392	634	682	521	496	559	588
ENSG00000042062	RIPOR3	8	1	0	0	0	0	0	1	0	1	0	0	0	3	5	3	1	1	2	7	0	1	3	2	5	7	1	6	3	0
ENSG00000042088	TDP1	3426	2418	2462	2958	2440	1711	2311	1980	3093	3223	2177	2256	2193	2409	2395	2073	1883	2422	2369	2369	3871	4063	2628	3092	3550	3542	3228	2471	3538	3051
ENSG00000042286	AIFM2	223	144	149	178	163	121	138	153	187	213	150	132	136	146	191	124	102	178	118	181	229	203	198	154	330	219	225	203	221	248
ENSG00000042304	C2orf83	0	0	0	0	0	0	0	0	0	0	0	0	0	0	0	0	0	0	0	0	0	0	0	0	0	0	0	0	0	0
ENSG00000042317	SPATA7	288	234	214	247	203	154	165	177	276	286	203	178	244	201	193	198	198	246	201	319	409	419	308	281	349	308	320	218	284	414
ENSG00000042429	MED17	1600	1264	1372	1511	1188	985	1125	1007	1669	1702	1145	1157	1235	1146	1074	1156	1083	1423	1294	1641	2306	2458	1821	1776	2143	1876	1748	1296	1864	2099
ENSG00000042445	RETSAT	2073	1534	1658	1819	1453	1045	1394	1343	2035	2170	1454	1364	1647	1475	1559	1160	1055	1994	1265	2001	2213	2306	2109	1613	3146	2105	1842	1854	1958	2472
ENSG00000042493	CAPG	25	13	9	8	10	12	11	11	16	13	10	13	10	14	15	5	4	19	16	23	12	17	16	4	20	22	10	11	11	26
ENSG00000042753	AP2S1	3905	2738	2784	3086	2497	1902	2724	2362	3360	3445	2435	2554	2560	2610	2682	2476	2241	3553	2549	3030	4465	4640	3187	3270	4746	4466	3935	3326	4067	3639
ENSG00000042781	USH2A	7	0	0	1	2	0	0	0	0	2	1	0	0	0	0	2	3	1	1	1	0	1	0	1	0	0	0	1	3	3
ENSG00000042813	ZPBP	2	1	0	0	0	0	0	0	0	0	0	0	0	0	0	0	0	0	0	0	0	1	0	0	0	0	0	0	0	0
ENSG00000042832	TG	25	16	22	13	15	12	14	13	31	19	12	15	11	9	24	8	7	11	16	20	16	24	21	11	24	21	19	29	15	19
ENSG00000042980	ADAM28	24	12	7	16	10	17	11	9	16	11	12	9	11	13	4	24	18	9	13	8	47	36	19	14	9	41	31	11	27	6
ENSG00000043039	BARX2	8	8	10	8	5	2	6	10	10	8	9	8	4	5	4	2	11	7	8	10	2	14	9	4	10	8	6	10	17	6
ENSG00000043093	DCUN1D1	1787	1447	1825	2015	1484	1207	1432	1185	2117	2013	1355	1425	1717	1422	1321	1384	1521	1637	1696	2376	3043	2938	2351	2432	2490	1941	1944	1445	2094	3516
ENSG00000043143	JADE2	611	473	450	505	452	311	429	396	608	677	431	436	532	522	496	362	315	509	397	409	610	721	567	525	687	625	577	543	607	544
ENSG00000043355	ZIC2	1073	775	910	948	843	513	764	685	1115	1233	786	733	783	764	824	611	543	989	788	1127	1170	1141	1144	975	1742	997	1006	1031	1139	1302
ENSG00000043462	LCP2	6	3	2	0	0	0	3	0	1	0	1	1	1	2	1	2	3	3	0	0	0	1	2	5	2	2	6	0	1	3
ENSG00000043514	TRIT1	1151	849	944	1004	771	671	779	777	1162	1095	838	810	847	823	766	915	796	948	933	1038	1704	1669	1258	1130	1461	1525	1276	1074	1359	1350
ENSG00000043591	ADRB1	65	38	55	48	44	22	45	44	51	67	32	51	47	44	43	39	24	38	50	62	72	66	74	62	99	56	45	61	50	56
ENSG00000044012	GUCA2B	0	0	0	1	0	0	0	0	0	0	0	0	0	0	0	0	0	0	0	0	0	0	0	0	0	0	0	0	0	0
ENSG00000044090	CUL7	823	598	526	615	487	372	558	479	785	717	627	544	530	527	543	367	398	679	465	531	866	769	808	570	1126	781	634	678	706	794
ENSG00000044115	CTNNA1	12784	9702	10049	11149	8745	6659	9028	7757	12186	13078	8743	8732	9337	9458	9125	8141	7129	10201	8308	11098	14304	14804	12004	10722	17775	13018	11856	10443	13058	14362
ENSG00000044446	PHKA2	1069	772	764	944	744	539	679	643	1054	909	724	709	717	767	656	759	671	788	719	965	1306	1210	1041	842	1453	1128	1066	878	1087	1058
ENSG00000044459	CNTLN	652	471	549	623	475	408	491	435	782	626	505	489	534	464	422	512	462	522	564	569	1127	1017	707	795	736	790	733	522	751	883
ENSG00000044524	EPHA3	3063	2264	3138	2599	2605	1694	2002	2512	3053	3659	2044	2094	2931	2227	2452	2136	1820	2746	2225	3346	3620	3810	3409	2648	5009	3348	3081	2863	3261	4175
ENSG00000044574	HSPA5	19602	14704	16757	16257	12056	10243	14111	14280	18009	17330	13163	13584	16162	13580	12768	17204	15210	27305	16551	20940	31249	31673	29748	21951	34556	28288	25746	27156	26813	26879
ENSG00000046604	DSG2	14283	11325	12151	13764	10734	8127	10230	8902	15352	14661	10454	10242	11218	10936	9692	10934	10574	11109	11624	11974	22254	21893	16000	14868	14738	17888	16419	11344	16487	15708
ENSG00000046647	GEMIN8	629	492	571	543	433	324	485	405	702	667	449	433	435	430	474	445	386	547	471	554	791	825	662	612	891	842	704	602	756	727
ENSG00000046651	OFD1	585	393	456	469	420	317	381	384	636	518	433	362	379	347	356	324	275	400	375	498	656	630	593	440	767	577	515	414	525	769
ENSG00000046653	GPM6B	34	33	69	51	40	26	25	28	39	47	30	42	27	37	35	26	31	45	25	37	50	55	45	38	51	62	40	27	35	57
ENSG00000046774	MAGEC2	7	10	8	7	10	1	7	11	13	7	8	6	3	12	13	5	8	11	5	12	7	8	11	9	14	10	15	7	14	11
ENSG00000046889	PREX2	51	29	38	31	38	30	26	25	60	49	37	30	27	32	20	34	21	27	35	28	64	63	28	34	29	53	42	26	45	36
ENSG00000047056	WDR37	1227	922	1006	1138	797	631	846	742	1208	1205	916	852	836	902	907	763	751	924	834	1067	1597	1473	1176	1127	1554	1406	1263	1091	1318	1348
ENSG00000047188	YTHDC2	2483	2002	2085	2472	1884	1399	1776	1643	2766	2574	1756	1797	1904	1779	1641	1941	1734	1857	2016	2386	3493	3610	2683	2571	2947	3075	2600	2017	2905	3225
ENSG00000047230	CTPS2	1838	1296	1381	1562	1218	939	1264	1067	1739	1637	1183	1220	1266	1329	1163	1296	1098	1527	1355	1518	2315	2400	1749	1716	2281	2069	1982	1509	2078	2012
ENSG00000047249	ATP6V1H	1499	1118	1352	1480	1252	836	1114	998	1559	1616	1046	1029	1225	1065	1227	1019	948	1321	1005	1506	1870	1929	1503	1354	2058	1593	1515	1283	1528	1933
ENSG00000047315	POLR2B	7478	5917	6015	6951	5333	4087	4986	4462	7565	7467	5360	5466	5899	5511	4973	5824	5536	6106	6479	7282	11127	11104	7817	7783	9800	9276	8417	5973	9592	9448
ENSG00000047346	FAM214A	2852	2118	2582	2786	1951	1781	1914	2049	3303	2582	2350	2486	2893	2274	1762	1968	1918	2093	2219	2880	4468	4047	3366	3147	3507	3188	2816	2253	2750	4180
ENSG00000047365	ARAP2	371	224	341	340	278	211	244	234	369	386	276	257	319	251	284	239	234	260	280	354	517	446	378	325	415	366	362	279	305	517
ENSG00000047410	TPR	5692	4441	4626	4947	4009	3142	3828	4143	6714	5601	4280	4275	4900	4317	3869	4012	3833	3866	3978	4080	7224	7864	6586	5093	6930	6780	6255	4728	5874	6344
ENSG00000047457	CP	30	27	29	34	28	15	16	17	45	50	13	19	35	21	31	20	18	27	16	39	31	40	31	25	87	28	40	31	49	52
ENSG00000047578	KIAA0556	2392	1694	1747	2095	1707	1106	1580	1492	2384	2352	1610	1569	1640	1725	1737	1351	1162	1734	1380	1857	2317	2322	2208	1734	3103	2296	2000	1941	2089	2481
ENSG00000047579	DTNBP1	364	271	301	287	208	197	220	209	394	319	220	247	325	256	250	236	199	351	230	241	407	397	376	293	493	391	342	301	363	364
ENSG00000047597	XK	0	0	0	0	0	0	0	0	0	0	0	0	0	0	0	0	0	0	0	0	0	0	0	0	0	0	0	0	0	0
ENSG00000047617	ANO2	18	8	23	16	21	7	10	13	28	23	5	12	17	11	19	6	9	19	10	16	7	19	10	15	32	14	10	16	16	16
ENSG00000047621	C12orf4	696	563	611	678	556	438	476	459	745	724	554	505	617	530	449	602	620	605	640	801	1228	1290	807	825	935	964	871	548	913	1079
ENSG00000047634	SCML1	482	375	479	539	428	322	417	370	544	570	397	377	468	407	384	544	482	539	563	645	1017	1066	670	764	837	854	667	514	818	866
ENSG00000047644	WWC3	903	667	678	792	663	494	647	574	946	981	686	598	725	706	752	569	523	826	629	818	1120	1113	974	884	1437	936	898	830	959	1151
ENSG00000047648	ARHGAP6	1971	1468	1659	1597	1340	1133	1395	1315	1831	1921	1372	1329	1418	1341	1285	1317	1284	1714	1492	1432	2465	2533	1980	1757	2382	2355	1953	1793	2151	2055
ENSG00000047662	FAM184B	66	37	44	66	57	24	46	33	66	103	43	40	58	51	55	21	25	31	29	62	36	42	59	26	106	38	35	39	44	87
ENSG00000047849	MAP4	13958	10131	10442	11621	9722	6768	9663	8486	13650	14292	9500	9451	9877	10253	10129	8741	7817	12168	9366	12558	15509	15363	14700	11482	19882	14437	12844	12341	13823	15596
ENSG00000047932	GOPC	970	678	788	886	705	540	629	594	900	975	613	625	767	632	612	612	523	719	677	861	1225	1249	1032	890	1092	1045	883	739	954	1256
ENSG00000047936	ROS1	3	0	0	0	0	0	0	0	0	0	0	0	0	0	0	0	0	1	0	0	0	0	0	0	0	0	0	0	0	0
ENSG00000048028	USP28	1179	955	924	1056	882	670	841	747	1206	1156	801	818	896	842	737	910	759	1010	921	1042	1703	1632	1214	1185	1602	1490	1340	1024	1405	1428
ENSG00000048052	HDAC9	1	2	2	1	0	0	4	2	1	2	2	0	0	6	0	5	3	2	3	0	1	0	1	2	2	7	1	1	2	5
ENSG00000048140	TSPAN17	2072	1560	1441	1759	1256	1009	1404	1199	1864	1872	1330	1446	1365	1416	1387	1140	1103	1831	1289	1682	2177	2347	1714	1750	2691	2054	1764	1817	1935	2037
ENSG00000048162	NOP16	2459	1813	1626	2013	1352	1278	1657	1188	2171	1951	1613	1676	1466	1787	1436	1883	1639	2125	1907	1433	3261	3490	1806	2444	2348	3421	3102	1973	3055	1824
ENSG00000048342	CC2D2A	439	319	348	374	301	226	322	258	418	414	338	290	301	317	267	246	246	359	298	397	456	513	453	337	562	408	367	380	430	495
ENSG00000048392	RRM2B	1787	1478	1618	1698	1414	1077	1274	1183	1951	1986	1230	1271	1619	1327	1282	1146	1113	1397	1357	1905	2291	2364	1885	1743	2160	1834	1603	1387	1753	2610
ENSG00000048405	ZNF800	1216	924	1041	1293	960	806	909	763	1346	1250	948	911	1032	926	865	949	874	992	1075	1251	1974	1880	1341	1442	1378	1420	1357	1031	1305	1673
ENSG00000048462	TNFRSF17	0	0	0	0	0	0	0	0	0	0	0	0	0	1	0	0	0	0	0	0	0	0	0	0	0	0	0	0	1	0
ENSG00000048471	SNX29	1173	892	901	923	812	575	758	727	1186	1089	785	776	873	884	846	719	599	891	789	946	1249	1239	1126	949	1516	1138	1086	993	1070	1203
ENSG00000048540	LMO3	2	0	0	0	0	0	0	0	0	0	0	0	0	0	0	0	0	0	0	0	1	0	1	0	1	0	0	0	0	0
ENSG00000048544	MRPS10	542	430	486	545	435	372	409	354	593	569	375	416	469	449	400	459	401	573	507	654	926	870	665	741	811	717	620	475	655	961
ENSG00000048545	GUCA1A	2	0	0	0	0	0	0	0	0	1	2	0	0	0	0	0	0	0	0	0	0	0	0	0	1	0	0	0	0	0
ENSG00000048649	RSF1	2603	2034	2026	2360	1869	1407	1795	1726	2793	2856	1956	1975	2228	1949	1854	1591	1549	2141	1754	2362	3243	3418	3370	2340	3722	2728	2608	2261	2816	3577
ENSG00000048707	VPS13D	6486	4824	5262	5770	4877	3381	4352	4122	6692	6468	4654	4338	4652	4737	4355	4254	3597	4375	4147	5882	7616	7297	6354	5217	8576	6836	5687	5085	5678	7023
ENSG00000048740	CELF2	6	0	0	0	0	0	0	0	0	0	0	0	0	0	0	0	0	0	0	0	0	0	4	0	0	0	0	0	1	0
ENSG00000048828	FAM120A	13489	9656	10296	11153	8833	6720	9115	8128	12710	13169	9236	8871	9161	9516	9324	9175	8115	10349	9554	11370	17055	16483	12708	12466	16620	15364	13730	10987	14213	13578
ENSG00000048991	R3HDM1	2584	2012	2030	2347	1788	1399	1851	1608	2702	2753	1810	1788	1941	1781	1772	1882	1714	2086	2014	2417	3581	3383	2691	2660	3253	3000	2763	2023	2810	3035
ENSG00000049089	COL9A2	136	103	94	136	106	73	98	83	155	139	104	103	105	122	120	63	93	135	97	135	162	153	133	145	281	150	173	136	163	202
ENSG00000049130	KITLG	88	56	82	103	87	81	74	56	76	101	69	74	66	74	62	88	82	78	103	99	155	145	102	117	88	116	110	46	137	115
ENSG00000049167	ERCC8	307	242	284	310	267	205	251	224	361	314	239	213	289	227	231	223	246	304	272	382	478	473	386	331	436	397	333	264	372	524
ENSG00000049192	ADAMTS6	4	1	0	1	2	0	2	0	1	1	1	2	0	0	1	1	0	3	2	0	1	3	4	1	4	1	0	0	4	6
ENSG00000049239	H6PD	3985	3040	3314	3427	3027	1927	2935	2750	4004	4240	2845	2791	3039	2951	3014	2632	2246	3162	2542	3721	4379	4413	4080	3393	5598	4138	3680	3697	3968	4235
ENSG00000049245	VAMP3	2238	1635	1798	2024	1583	1148	1359	1191	2162	2226	1477	1537	1600	1531	1454	1416	1492	1847	1738	2137	3045	3052	2163	2193	2810	2519	2216	1707	2460	2829
ENSG00000049246	PER3	2708	2068	2025	2444	1859	1391	1766	1587	2600	2606	1962	1770	1803	2022	1889	1643	1470	1610	1659	1800	3115	2983	2012	2116	2615	2715	2358	1684	2506	2213
ENSG00000049247	UTS2	4	4	0	2	1	0	1	1	5	3	1	1	2	0	0	2	1	3	1	5	9	4	4	0	17	4	4	2	5	8
ENSG00000049249	TNFRSF9	0	1	0	0	2	2	0	0	5	3	0	0	5	1	2	1	0	1	2	2	0	0	2	0	1	0	0	4	0	6
ENSG00000049283	EPN3	4396	2997	2778	3445	2835	1995	2942	2344	4055	3869	2843	2672	2696	2922	2863	2626	2246	3013	2673	2815	4798	4696	3206	3448	4830	4651	4156	3273	4408	3403
ENSG00000049323	LTBP1	182	128	133	138	121	90	105	141	154	157	98	120	120	125	111	136	116	135	101	209	211	197	259	145	307	169	200	149	195	241
ENSG00000049449	RCN1	3203	2355	2900	2699	2447	1596	2150	2369	2929	3428	2118	2129	2784	2252	2591	2184	2042	4008	2392	4352	4228	4245	4726	3014	6336	3634	3338	4137	3684	5646
ENSG00000049540	ELN	3	1	2	0	2	1	0	0	0	0	1	1	1	1	3	4	1	3	1	2	1	4	1	2	9	0	2	2	1	5
ENSG00000049541	RFC2	1390	999	982	1181	866	698	879	771	1267	1224	902	971	849	956	860	1136	982	1414	1204	1060	2202	2324	1317	1533	1501	2022	1879	1335	1939	1211
ENSG00000049618	ARID1B	3056	2299	2427	2673	2195	1468	2087	1925	3220	3176	2108	2084	2317	2230	2232	1899	1756	2283	1977	2391	3541	3464	2924	2650	4146	3270	2977	2430	2977	3176
ENSG00000049656	CLPTM1L	4886	3625	3601	4096	3115	2475	3357	2798	4578	4424	3485	3432	3474	3673	3596	3597	3213	4707	3799	3617	6949	6876	4942	5055	6132	6172	5326	4587	5984	4873
ENSG00000049759	NEDD4L	9858	7095	7249	8168	5201	5353	6629	5724	9285	7386	6722	6482	6503	6428	5171	7501	6226	7556	7288	7165	13881	13437	9666	9242	9754	12160	10449	8026	10584	8718
ENSG00000049768	FOXP3	18	14	14	37	26	13	32	19	25	30	14	10	27	24	21	24	21	28	22	41	24	37	37	25	53	37	32	30	25	26
ENSG00000049769	PPP1R3F	57	36	47	44	44	40	40	32	70	57	39	55	39	43	45	37	27	43	25	55	78	72	46	56	89	62	61	63	52	62
ENSG00000049860	HEXB	2345	1857	2261	2304	1799	1335	1723	1666	2289	2388	1598	1671	1931	1729	1759	1720	1733	2445	1981	2576	3584	3438	2618	2600	3595	2775	2686	2252	2840	3517
ENSG00000049883	PTCD2	840	592	673	762	588	475	560	540	770	787	532	578	605	549	510	612	610	731	673	917	1333	1232	931	910	1251	948	945	777	1052	1210
ENSG00000050030	NEXMIF	71	57	54	66	41	37	44	52	59	58	44	48	49	38	46	37	29	31	43	54	63	54	66	40	80	51	41	46	53	62
ENSG00000050130	JKAMP	1342	1039	1257	1202	984	925	872	835	1344	1321	899	973	1164	997	953	977	962	1214	1185	1413	2067	2092	1470	1478	1668	1507	1527	1074	1698	1893
ENSG00000050165	DKK3	1	0	0	0	0	1	0	1	0	0	0	0	0	0	0	0	0	2	0	0	1	0	2	3	0	1	0	0	0	0
ENSG00000050327	ARHGEF5	555	418	361	395	332	246	341	354	723	533	517	485	513	527	390	365	343	443	416	371	751	706	697	537	822	598	504	525	582	550
ENSG00000050344	NFE2L3	495	403	357	502	361	253	307	280	503	516	362	346	373	374	336	367	337	417	422	506	801	703	538	529	641	567	571	438	588	610
ENSG00000050393	MCUR1	1245	928	1071	1124	874	670	922	791	1205	1229	825	865	939	894	949	870	848	1328	1044	1547	1867	1854	1514	1359	1959	1490	1278	1183	1423	1790
ENSG00000050405	LIMA1	2084	1582	1672	1913	1560	1151	1294	1289	2034	2178	1415	1449	1595	1453	1512	1161	1088	1710	1265	1784	2132	2354	2061	1500	2657	1900	1878	1550	1947	2484
ENSG00000050426	LETMD1	1698	1272	1466	1622	1296	893	1139	1094	1772	1576	1135	1187	1254	1173	1139	1249	1068	1495	1294	1614	2266	2241	1764	1706	2194	1867	1789	1580	1850	1957
ENSG00000050438	SLC4A8	7	2	1	1	3	2	2	2	3	4	4	3	0	6	7	1	5	3	3	3	2	6	2	4	11	6	3	3	6	6
ENSG00000050555	LAMC3	26	11	10	13	18	13	13	21	27	9	14	17	4	18	15	10	10	18	10	12	20	15	23	8	15	23	11	14	23	13
ENSG00000050628	PTGER3	4	0	2	1	2	1	1	0	3	2	2	3	1	4	0	2	0	1	1	3	0	0	1	0	2	1	1	0	1	5
ENSG00000050730	TNIP3	0	0	0	0	0	0	0	0	0	0	0	0	0	0	0	0	0	0	0	2	0	0	0	0	0	0	0	0	0	0
ENSG00000050748	MAPK9	2071	1654	1752	1869	1508	1116	1445	1340	2081	2046	1428	1454	1576	1486	1458	1334	1222	1663	1498	2000	2803	2710	1967	1991	2614	2202	2049	1570	2112	2555
ENSG00000050767	COL23A1	19	9	8	16	5	11	2	7	8	12	14	4	6	4	6	10	5	11	8	9	10	15	11	5	11	14	8	13	6	10
ENSG00000050820	BCAR1	2016	1578	1318	1605	1159	957	1393	1089	2169	1754	1578	1464	1411	1651	1512	1333	1260	1640	1479	1381	2654	2632	1903	1941	2671	2417	2013	1724	2312	1816
ENSG00000051009	FAM160A2	1157	886	918	1017	786	591	884	730	1188	1139	785	774	865	778	829	696	620	941	796	946	1219	1281	1042	943	1544	1181	1077	1000	1165	1187
ENSG00000051108	HERPUD1	2015	1510	2657	1661	1806	1063	1373	2182	1704	2681	1319	1299	2497	1285	1924	1777	1535	3558	1905	3731	3370	3332	3837	2281	5506	3055	2759	3406	2979	4628
ENSG00000051128	HOMER3	149	122	117	130	69	78	133	70	178	128	150	119	128	130	116	87	77	142	84	105	184	162	147	107	212	163	113	149	163	142
ENSG00000051180	RAD51	540	371	367	412	358	231	342	298	488	503	409	323	315	375	357	445	396	519	490	392	806	935	502	649	550	748	675	506	728	439
ENSG00000051341	POLQ	2565	1974	2074	2345	1680	1508	1853	1635	2652	2285	1945	1776	1738	1735	1467	2261	1796	1809	2097	1898	3863	4026	2736	2702	2458	3536	3058	2004	2842	2492
ENSG00000051382	PIK3CB	2595	2072	2421	2644	2031	1537	1848	1858	2927	2935	2005	1886	2499	2044	2059	1968	1854	2511	2106	2731	4130	3905	3621	2969	3846	3023	2678	2435	3070	4025
ENSG00000051523	CYBA	1	2	0	0	0	1	1	3	3	1	3	0	2	0	2	0	0	0	0	0	0	1	2	0	1	5	0	0	0	0
ENSG00000051596	THOC3	857	625	698	768	619	438	593	551	823	807	537	583	601	642	578	702	651	905	756	729	1189	1392	827	987	1141	1284	1086	918	1302	1035
ENSG00000051620	HEBP2	3692	2860	3022	3342	2455	1964	2705	2405	3496	3261	2640	2711	2843	2440	2300	2749	2675	3265	2729	2805	5835	5706	3594	3797	3675	4783	4070	2954	3743	3581
ENSG00000051825	MPHOSPH9	3821	2978	3029	3357	2127	2258	2565	2179	3731	3066	2693	2756	2572	2442	2020	3494	3029	2727	3326	2762	6199	6428	3938	4186	3391	5501	4674	2745	4514	3474
ENSG00000052126	PLEKHA5	1388	1066	1283	1274	1096	795	954	1004	1500	1430	1015	966	1152	979	1018	921	863	1003	993	1175	1771	1942	1385	1352	1646	1556	1386	1123	1442	1500
ENSG00000052344	PRSS8	1648	1237	1296	1406	1319	787	1234	1027	1542	1789	1128	1097	1147	1268	1256	900	816	1734	942	1989	1577	1661	1851	1249	3317	1590	1444	2052	1659	2328
ENSG00000052723	SIKE1	1902	1503	1761	1895	1454	1086	1349	1248	1975	1898	1332	1431	1666	1333	1351	1281	1196	1626	1489	2087	2812	2695	2162	1890	2329	2106	1937	1377	1975	2730
ENSG00000052749	RRP12	3210	2288	1919	2482	1805	1655	2312	1785	3364	2742	2586	2644	2358	2666	2265	2379	2078	2788	2511	1633	4525	4400	3217	3267	3821	4246	3544	2686	3660	2781
ENSG00000052795	FNIP2	1435	1076	1258	1243	1048	790	972	1024	1405	1493	1029	972	1164	1032	995	1219	1073	1192	1262	1212	2257	2234	1506	1527	1645	2040	1658	1247	1742	1472
ENSG00000052802	MSMO1	729	587	612	760	578	477	502	462	720	803	519	560	710	497	534	661	688	815	813	1336	1662	1457	1064	1214	1261	940	883	620	993	2016
ENSG00000052841	TTC17	2836	2053	2435	2455	1973	1499	1911	1982	2890	2971	1848	1912	1934	1804	1774	1752	1475	2090	1677	2443	3201	3343	2689	2278	3625	2797	2518	2142	2665	3027
ENSG00000052850	ALX4	258	156	161	216	165	107	162	155	263	255	172	160	145	167	186	121	109	193	115	201	279	247	240	183	347	204	166	196	208	261
ENSG00000053108	FSTL4	12	3	3	3	7	1	2	11	10	5	2	1	4	8	8	4	0	9	2	2	2	4	7	5	6	8	6	2	3	10
ENSG00000053254	FOXN3	3397	2428	3222	3068	3080	1780	2285	2705	3364	4133	2172	2161	2965	2458	2752	1811	1634	2313	1929	3158	3681	3338	3187	2658	4174	2757	2627	2589	2869	4014
ENSG00000053328	METTL24	2	0	1	1	0	0	0	0	0	0	0	0	0	0	0	0	0	0	0	0	0	0	1	0	0	1	0	0	0	1
ENSG00000053371	AKR7A2	1149	845	862	929	777	553	840	667	988	978	795	812	748	792	732	780	717	1236	865	1004	1334	1532	1053	1044	1503	1304	1245	1142	1341	1225
ENSG00000053372	MRTO4	1916	1420	1280	1568	1059	998	1454	1101	1820	1515	1328	1449	1185	1508	1235	1585	1346	1705	1524	1381	2760	2904	1837	2030	2017	2606	2357	1691	2578	1624
ENSG00000053438	NNAT	2	1	0	1	1	1	3	0	0	0	1	1	1	0	2	0	2	2	3	1	2	0	1	2	0	2	0	0	1	2
ENSG00000053501	USE1	726	590	602	682	528	390	571	485	685	679	497	509	503	577	499	529	471	927	553	635	957	1058	751	722	1158	919	810	799	930	887
ENSG00000053524	MCF2L2	163	122	167	133	119	82	129	144	194	210	98	86	124	91	90	68	73	120	86	148	117	155	178	80	228	119	101	130	119	218
ENSG00000053702	NRIP2	2	0	1	0	1	1	0	0	0	0	0	2	0	0	0	1	0	1	0	0	0	1	0	1	2	1	4	1	2	0
ENSG00000053747	LAMA3	9606	7126	6708	7810	5313	5177	6366	5817	9535	7109	6930	6367	5911	6522	4932	6167	5116	7339	6002	7054	11022	11059	10414	7969	11791	10411	8728	8584	9073	9188
ENSG00000053770	AP5M1	1177	879	1049	1075	919	689	792	716	1157	1246	854	799	983	765	761	833	792	1026	1038	1294	1652	1830	1330	1190	1505	1260	1211	927	1306	1668
ENSG00000053900	ANAPC4	713	518	622	752	577	440	511	477	811	681	520	508	521	509	431	512	504	594	548	689	1135	1061	825	788	860	921	759	639	782	964
ENSG00000053918	KCNQ1	240	154	196	187	151	101	203	135	227	283	153	145	142	176	152	122	87	186	147	202	157	233	222	160	349	183	184	260	188	272
ENSG00000054116	TRAPPC3	2313	1602	1604	1882	1372	1182	1482	1328	2039	1999	1403	1408	1455	1497	1475	1491	1308	1972	1464	1765	2586	2712	1935	1961	2838	2443	2352	1866	2341	2206
ENSG00000054118	THRAP3	9810	7325	7471	8332	6326	4969	6950	6376	10014	9431	7156	7487	7997	7353	6841	7438	6488	8437	7591	7421	13808	13519	10374	9741	12949	12465	11138	8690	11368	10414
ENSG00000054148	PHPT1	1936	1328	1483	1621	1234	955	1321	1143	1786	1669	1277	1345	1335	1304	1323	995	998	2036	1089	1648	1815	2081	1646	1507	2657	1912	1739	1874	1827	1965
ENSG00000054179	ENTPD2	310	231	261	281	225	142	253	196	325	350	215	192	218	253	231	180	181	271	195	307	329	341	314	277	561	334	257	292	298	323
ENSG00000054219	LY75	0	0	0	0	0	0	0	0	0	1	0	1	0	0	0	0	0	1	0	0	0	0	0	0	0	0	0	0	0	0
ENSG00000054267	ARID4B	1724	1343	1400	1704	1210	998	1245	1148	1942	1786	1333	1361	1410	1352	1168	1245	1119	1385	1304	1579	2452	2525	1968	1642	2425	1986	1816	1450	1873	2640
ENSG00000054277	OPN3	74	44	45	40	42	39	33	40	52	63	28	30	38	41	53	42	39	60	37	61	76	76	58	43	95	62	76	62	70	68
ENSG00000054282	SDCCAG8	776	576	656	721	607	399	609	548	814	809	596	567	613	593	568	499	457	737	527	715	907	988	757	691	1096	815	741	734	859	961
ENSG00000054356	PTPRN	4	0	0	2	1	0	1	0	1	0	0	0	0	1	0	0	3	0	0	0	0	0	0	0	2	0	2	0	0	2
ENSG00000054392	HHAT	16	7	13	14	9	6	11	7	12	20	16	14	13	6	9	8	8	10	10	20	11	18	30	10	27	12	6	14	9	15
ENSG00000054523	KIF1B	8933	6973	7171	7809	6847	4628	6132	5842	9167	9722	6465	6100	6966	6786	6735	5709	4877	6897	5998	8149	10468	10253	9280	7525	12585	9183	8228	7234	8638	10449
ENSG00000054598	FOXC1	9	2	13	4	5	1	2	2	5	11	6	1	9	2	6	4	2	2	5	1	6	7	3	2	10	3	4	5	0	5
ENSG00000054611	TBC1D22A	993	761	678	803	601	476	655	581	911	861	660	658	682	714	744	513	434	837	567	802	942	1042	891	759	1287	928	903	809	912	957
ENSG00000054654	SYNE2	5033	3642	4005	4379	3731	2575	3450	3467	5445	5233	3537	3432	3879	3519	3418	3353	2871	3360	3397	4622	6302	6412	5526	4706	6445	5178	5188	4134	4589	5985
ENSG00000054690	PLEKHH1	2912	2114	2332	2486	2094	1411	2000	2095	3146	2741	2089	1908	2098	2126	1998	1609	1393	2143	1720	2501	2836	2931	2955	2375	3792	2715	2341	2461	2592	3129
ENSG00000054793	ATP9A	4503	3409	3463	3901	3338	2322	2904	2763	4521	4764	3158	3082	3330	3468	3396	2435	2155	3408	2699	4009	4586	4462	4529	3484	6318	4054	3550	3494	4050	5069
ENSG00000054796	SPO11	0	0	0	2	0	0	0	0	0	0	0	0	0	0	0	0	0	0	0	0	0	0	0	0	0	0	0	0	0	0
ENSG00000054803	CBLN4	0	1	0	0	0	0	0	0	0	0	0	0	0	0	0	0	0	1	0	0	0	0	0	0	0	0	0	0	0	0
ENSG00000054938	CHRDL2	4	0	1	0	0	0	2	0	0	0	0	0	0	0	0	0	0	0	0	3	0	0	0	0	0	1	0	2	0	0
ENSG00000054965	FAM168A	3054	2303	2347	2773	2321	1453	2171	1838	2974	3101	2102	2020	1942	2241	2304	1814	1713	2376	1951	2792	3456	3340	2925	2531	4374	2965	2736	2537	2934	3509
ENSG00000054967	RELT	316	189	180	264	182	169	244	170	347	241	269	229	226	231	186	206	209	249	240	179	398	440	366	346	342	421	319	256	398	256
ENSG00000054983	GALC	1	0	0	0	0	0	0	0	0	0	0	0	1	0	0	0	1	0	0	0	0	0	0	0	1	0	0	0	0	0
ENSG00000055044	NOP58	3978	3048	2993	3652	2643	2343	2806	2339	4188	3827	2922	2958	3040	2934	2610	3703	3653	3688	3961	3671	7238	7630	4532	4853	5032	6345	5698	3590	6157	5006
ENSG00000055070	SZRD1	4943	3592	3349	3918	3232	2320	3479	2729	4604	4478	3320	3274	2969	3616	3205	3286	2993	4217	3608	4047	6084	6150	4068	4443	6275	5627	5151	4251	5584	4808
ENSG00000055118	KCNH2	49	28	31	34	26	17	19	17	30	47	32	24	24	37	29	14	21	47	19	21	43	42	45	20	58	34	28	31	18	42
ENSG00000055130	CUL1	3205	2370	2449	2890	2241	1656	2145	1865	3058	3048	2041	2069	2198	2273	2152	2425	2226	2655	2482	2642	4365	4393	3094	3131	3674	3753	3467	2587	3825	3479
ENSG00000055147	FAM114A2	942	708	753	850	679	601	715	651	940	1016	648	688	706	666	649	720	607	888	714	1051	1285	1298	977	904	1397	1113	989	818	1131	1290
ENSG00000055163	CYFIP2	2512	1833	1981	2087	1858	1251	1809	1636	2513	2692	1673	1727	1728	1909	1850	1275	1160	1985	1422	2196	2398	2478	2365	1796	3581	2176	2004	2249	2225	2870
ENSG00000055208	TAB2	1670	1396	1489	1430	1273	968	1226	1112	1975	1774	1299	1341	1654	1308	1194	1169	1024	1537	1251	1526	2592	2423	1977	1761	2496	1942	1744	1382	1825	2326
ENSG00000055211	GINM1	636	495	595	667	564	345	470	450	726	667	457	503	547	487	472	546	500	675	570	740	1101	1082	817	799	909	799	702	563	765	1051
ENSG00000055332	EIF2AK2	1584	1192	1313	1377	1228	902	1080	937	1705	1601	1112	1051	1176	1079	1053	1010	1024	1139	1145	1648	2166	2102	1609	1427	1880	1629	1398	1129	1442	2005
ENSG00000055483	USP36	1887	1335	1399	1673	1239	932	1331	1098	2067	1787	1443	1406	1460	1520	1384	1326	1205	1387	1356	1265	2520	2291	1754	1793	2271	2266	2000	1598	2085	1742
ENSG00000055609	KMT2C	10524	7896	8570	9592	8206	5652	7474	7148	11434	11229	7509	6812	7620	7425	7232	6481	5422	7387	6336	10178	11094	11445	11089	8087	15258	10447	9472	8553	9110	12519
ENSG00000055732	MCOLN3	3	0	0	0	0	0	0	0	0	0	1	0	0	0	0	1	0	0	0	0	0	0	0	0	0	0	1	0	1	0
ENSG00000055813	CCDC85A	7	7	10	14	9	2	6	8	5	18	6	7	8	8	8	4	4	14	13	15	25	23	10	11	27	16	12	15	10	14
ENSG00000055917	PUM2	4413	3216	3803	3907	3358	2469	2999	2918	4683	4703	3095	3123	3881	3247	3159	3154	2864	3632	3391	4060	6020	6218	4851	4195	5708	5101	4543	3664	4896	5769
ENSG00000055950	MRPL43	921	720	672	823	627	487	673	561	901	835	627	689	607	708	665	595	576	986	724	813	1116	1259	899	826	1231	1182	960	900	1077	955
ENSG00000055955	ITIH4	17	14	15	10	5	3	7	8	25	12	5	5	5	10	7	8	7	10	7	11	15	20	7	15	22	14	18	7	6	6
ENSG00000055957	ITIH1	5	0	0	2	2	0	0	2	0	3	0	0	0	0	1	1	0	2	0	1	1	0	2	0	0	0	0	0	0	1
ENSG00000056050	HPF1	406	330	398	422	332	236	276	265	437	445	247	308	365	308	300	361	303	379	407	493	725	685	497	596	555	500	398	355	502	758
ENSG00000056097	ZFR	3835	2977	3032	3556	2664	2075	2631	2238	4053	3779	2662	2679	2747	2755	2631	2912	2608	3500	3145	3906	5457	5839	4379	4005	5603	4708	4072	3413	4635	5379
ENSG00000056277	ZNF280C	466	388	479	483	375	318	365	334	493	559	358	350	435	365	332	358	308	347	348	453	685	708	515	449	533	561	497	360	536	539
ENSG00000056291	NPFFR2	0	0	0	0	0	0	0	0	0	0	0	0	1	1	0	0	0	0	0	0	1	0	1	0	0	0	0	0	0	0
ENSG00000056487	PHF21B	18	12	13	10	13	9	13	10	25	11	22	14	23	15	16	6	10	9	8	12	24	24	19	15	18	19	13	16	18	19
ENSG00000056558	TRAF1	10	1	1	1	2	0	2	1	2	2	3	3	4	1	0	2	1	2	1	0	1	10	4	1	8	8	2	8	3	7
ENSG00000056586	RC3H2	6613	5166	5890	6101	5324	3667	4654	4437	6684	7317	4746	4736	5458	4772	4997	4433	4015	5073	4701	6993	8549	8404	7031	5941	8743	6923	6309	5115	6688	9026
ENSG00000056736	IL17RB	725	523	596	669	582	425	510	500	775	698	499	511	459	496	464	495	469	567	489	532	906	987	725	687	856	831	785	677	884	641
ENSG00000056972	TRAF3IP2	690	385	500	549	487	336	423	419	588	630	424	414	458	432	498	405	350	541	456	602	780	705	567	589	941	729	659	512	713	792
ENSG00000056998	GYG2	219	148	122	175	127	100	113	125	194	171	149	153	130	145	146	98	112	177	123	197	194	164	169	115	295	137	136	171	190	192
ENSG00000057019	DCBLD2	215	150	174	182	187	115	142	124	229	231	179	154	155	154	155	132	118	149	131	198	292	208	212	172	262	184	162	116	191	265
ENSG00000057149	SERPINB3	2	0	0	0	0	0	0	0	0	0	0	0	0	0	0	0	0	0	0	0	0	0	0	0	0	0	0	0	0	0
ENSG00000057252	SOAT1	1618	1242	1279	1537	1161	909	971	968	1457	1390	1159	1119	1271	1084	1055	1287	1165	1180	1190	1312	2460	2305	1533	1547	1461	1906	1667	1085	1671	1573
ENSG00000057294	PKP2	287	203	219	257	181	158	192	144	251	262	173	161	244	214	172	179	128	239	180	234	307	340	251	238	329	248	254	208	279	282
ENSG00000057468	MSH4	46	35	38	37	40	33	34	34	56	34	32	36	38	35	30	17	23	35	24	33	31	55	54	34	48	57	34	35	42	62
ENSG00000057593	F7	1	1	2	0	0	0	0	1	1	2	1	0	1	1	1	1	0	3	1	2	3	2	7	0	5	0	0	3	0	0
ENSG00000057608	GDI2	11091	8131	8790	9784	7515	5905	7466	6511	10610	10923	7364	7796	8395	8009	7794	8807	8304	10261	9893	10988	17111	17561	11363	12218	14195	14150	13044	9248	14433	13886
ENSG00000057657	PRDM1	21	14	12	12	5	11	18	5	18	9	14	13	9	14	7	21	15	7	9	5	32	25	9	21	9	38	16	5	16	10
ENSG00000057663	ATG5	869	654	742	862	687	487	571	529	820	955	604	642	733	604	605	682	651	860	775	955	1296	1328	911	1002	1110	1087	1061	710	998	1240
ENSG00000057704	TMCC3	43	37	40	46	27	24	37	38	47	33	40	31	20	52	19	48	44	54	39	42	76	86	44	50	51	89	61	39	50	26
ENSG00000057757	PITHD1	1300	875	944	1081	748	611	900	672	1156	1021	870	867	852	869	757	973	844	1155	1004	935	1770	1841	1223	1254	1268	1616	1396	1132	1493	1085
ENSG00000057935	MTA3	1279	968	1013	1151	894	701	854	858	1312	1267	864	904	1031	861	934	823	728	1118	900	1189	1512	1606	1297	1154	1792	1358	1236	1045	1347	1504
ENSG00000058056	USP13	3408	2537	2707	2820	2355	1708	2283	1984	3231	3182	2345	2238	2340	2383	2256	2326	2096	2449	2435	2544	4231	4205	2981	3016	3704	3599	3181	2433	3364	3335
ENSG00000058063	ATP11B	6543	5172	6161	6584	5286	3801	4588	4416	7130	7119	4726	4883	6073	4759	4721	5064	4776	5550	5344	6871	10102	10195	7917	7049	8147	7535	6849	5548	6932	9298
ENSG00000058085	LAMC2	6	5	4	2	1	6	7	4	3	5	4	2	2	1	2	1	3	2	0	2	2	8	3	0	9	4	0	1	1	1
ENSG00000058091	CDK14	2262	1635	1860	2097	1658	1232	1652	1466	2235	2309	1647	1511	1634	1690	1676	1524	1344	1879	1644	2324	3074	2982	2437	2226	3252	2477	2184	1987	2400	3141
ENSG00000058262	SEC61A1	21120	15524	16063	17886	14223	10307	14406	12493	19259	20662	14433	14411	14921	14985	15054	13538	12098	19908	14108	19740	24557	24809	21681	18113	30610	22368	20408	19243	21645	23475
ENSG00000058272	PPP1R12A	3569	2828	3067	3493	2809	2090	2405	2342	3788	3922	2559	2482	2845	2493	2577	2490	2343	2878	2811	3770	4856	4901	3900	3498	4938	3793	3584	2805	3742	4944
ENSG00000058335	RASGRF1	17	2	6	8	5	1	7	6	8	13	3	5	6	3	2	5	3	13	7	3	5	10	5	8	14	15	5	9	12	1
ENSG00000058404	CAMK2B	777	535	464	543	449	342	450	426	836	650	574	610	575	601	501	440	374	623	454	407	771	817	787	629	851	739	604	623	706	647
ENSG00000058453	CROCC	137	104	106	106	61	59	95	94	224	97	155	138	177	135	91	64	80	116	61	76	189	147	138	109	176	158	93	133	118	110
ENSG00000058600	POLR3E	2337	1878	1697	1994	1351	1222	1763	1401	2425	2060	1802	1777	1603	1794	1594	1897	1531	1843	1805	1529	3452	3289	2238	2360	2669	3239	2685	2067	2797	1973
ENSG00000058668	ATP2B4	5032	3839	4146	4529	3705	2536	3522	3423	5058	5178	3454	3494	3677	3716	3671	3388	2881	3879	3411	4902	6028	5747	5257	4376	7223	5207	4655	4289	4781	5998
ENSG00000058673	ZC3H11A	6149	4580	5377	5637	4567	3385	4201	4113	6337	6381	4187	4082	4586	4401	4351	4112	3639	4571	3989	6224	7985	7810	6668	5479	7970	6655	5795	5111	6053	7861
ENSG00000058729	RIOK2	924	789	920	869	688	523	617	671	983	1015	686	728	808	652	686	856	843	938	874	1021	1570	1726	1043	1176	1208	1345	1110	790	1269	1446
ENSG00000058799	YIPF1	1075	744	832	912	772	569	765	679	1028	1071	726	724	784	775	798	833	681	935	773	1011	1367	1378	985	1015	1647	1408	1117	925	1298	1269
ENSG00000058804	NDC1	3141	2301	2795	2947	2471	1844	2154	1913	3300	3331	2296	2304	2579	2352	2344	3326	3294	3040	3646	3594	7088	6506	3961	4841	4018	5035	4524	2648	5004	4485
ENSG00000058866	DGKG	6	2	2	0	1	2	1	1	0	1	1	2	1	1	0	1	3	1	0	3	2	2	3	0	2	0	3	0	2	2
ENSG00000059122	FLYWCH1	977	795	645	752	572	476	660	661	1295	842	879	856	911	898	786	543	489	796	599	569	1183	1180	1162	1002	1480	1082	933	892	947	1012
ENSG00000059145	UNKL	1761	1384	1288	1530	1237	843	1225	1146	1981	1690	1351	1283	1383	1472	1361	1091	946	1528	1133	1256	2065	2098	1785	1512	2154	1822	1625	1537	1844	1583
ENSG00000059377	TBXAS1	329	212	222	230	217	179	215	176	251	296	207	204	237	202	224	157	95	197	138	206	238	259	256	190	286	212	219	200	217	189
ENSG00000059378	PARP12	824	536	569	677	571	383	495	476	816	745	526	472	489	585	522	405	414	690	498	686	866	876	761	690	1013	734	793	712	847	897
ENSG00000059573	ALDH18A1	6835	5036	4509	5798	4177	3483	4615	3734	6506	6034	4663	4646	4498	5065	4506	4904	4327	5827	5241	4765	9029	9284	6226	6570	7837	8338	7409	5779	7976	6323
ENSG00000059588	TARBP1	1023	786	987	1060	1000	601	806	863	1228	1187	841	748	898	821	860	776	698	907	847	1312	1678	1615	1379	1185	1746	1213	1164	1070	1177	1809
ENSG00000059691	GATB	860	619	665	773	554	439	636	513	823	763	619	533	659	673	628	570	505	825	631	699	990	1222	762	754	1236	1005	916	772	1014	939
ENSG00000059728	MXD1	309	241	298	298	243	168	204	225	294	276	213	203	254	228	206	219	174	273	212	336	406	371	339	263	436	346	271	294	315	395
ENSG00000059758	CDK17	362	313	356	381	329	229	266	262	394	440	269	292	272	253	309	269	251	314	314	431	544	569	391	372	565	417	381	346	443	547
ENSG00000059769	DNAJC25	281	254	267	302	186	183	254	187	365	344	225	224	260	219	202	259	213	316	272	319	549	544	319	371	402	415	352	269	405	428
ENSG00000059804	SLC2A3	20	15	9	6	1	18	17	4	15	2	15	20	4	13	2	44	23	5	25	0	50	49	14	35	3	61	50	14	21	0
ENSG00000059915	PSD	103	74	94	108	88	58	74	81	117	93	81	81	72	90	99	52	60	102	67	95	97	116	89	97	141	109	84	118	83	99
ENSG00000060069	CTDP1	519	433	332	398	246	266	377	348	771	454	577	556	600	637	513	379	357	448	420	285	941	738	746	624	781	654	612	480	640	580
ENSG00000060138	YBX3	7473	5343	5394	6475	4931	3745	5325	4460	6657	7096	4927	5078	5086	5298	5295	5328	4700	6042	5438	5412	9851	9344	6784	6828	8509	8962	7868	6230	8358	6769
ENSG00000060140	STYK1	441	339	414	366	309	271	344	320	452	399	276	313	372	292	294	312	242	348	246	334	523	583	476	373	499	460	461	392	437	414
ENSG00000060237	WNK1	15481	11226	11409	13045	9971	7774	10549	8961	15136	14431	10692	10382	10397	10929	9704	10319	8775	10306	10494	11186	18992	17906	14078	12984	16511	16523	14624	11051	14730	13761
ENSG00000060303	RPS17P5	2	3	0	0	0	0	1	0	0	0	0	0	0	0	0	0	0	0	0	0	0	0	0	0	0	0	1	0	1	0
ENSG00000060339	CCAR1	5665	4198	4285	5156	3784	3031	3779	3418	6219	5373	4155	3964	4155	4054	3543	3378	3132	3834	3629	4194	6654	6736	5434	4672	6409	5697	5146	3867	5270	6059
ENSG00000060491	OGFR	707	626	444	494	306	311	602	380	1230	566	921	960	912	872	588	420	443	592	493	275	1199	1094	948	805	999	912	632	648	722	630
ENSG00000060558	GNA15	3	0	2	0	0	0	1	0	0	0	0	1	0	0	0	0	0	1	2	1	3	0	1	1	0	0	2	0	0	2
ENSG00000060566	CREB3L3	0	0	0	0	0	0	0	0	0	2	1	0	0	0	0	0	0	0	0	0	0	0	0	0	0	0	0	0	0	0
ENSG00000060642	PIGV	734	534	641	651	546	362	526	521	700	759	550	528	619	537	595	485	421	644	530	679	899	920	700	681	1045	881	728	653	811	890
ENSG00000060656	PTPRU	1484	961	1055	1126	1015	638	922	843	1433	1450	991	924	955	1077	1066	755	655	1126	751	1001	1426	1371	1301	1056	1673	1303	1135	1188	1232	1204
ENSG00000060688	SNRNP40	3668	2611	2563	2923	2043	1781	2483	2038	3292	2891	2435	2417	2348	2389	2164	2724	2481	3084	2710	2577	4719	4986	3087	3297	3706	4662	4194	3067	4370	3243
ENSG00000060709	RIMBP2	3	0	0	0	0	0	0	0	1	1	0	0	0	1	0	0	0	0	0	0	0	0	0	1	1	0	0	0	0	0
ENSG00000060718	COL11A1	4	0	0	0	0	0	0	0	0	0	0	0	0	0	0	0	0	0	0	0	0	0	0	0	1	2	0	0	0	1
ENSG00000060749	QSER1	2785	2088	2487	2698	2220	1636	1822	1752	3011	3092	2123	2057	2303	2072	2025	2507	2204	2536	2812	3928	5112	5037	4100	3637	4356	3714	3597	2551	3612	5222
ENSG00000060762	MPC1	395	315	352	350	278	230	267	275	382	386	251	292	247	270	295	213	204	316	261	368	389	440	344	297	512	365	291	287	351	482
ENSG00000060971	ACAA1	3406	2508	2179	2754	1941	1668	2554	1890	2991	2695	2368	2353	2178	2453	1995	2295	1977	2837	2132	2063	4184	4230	2894	2957	3502	4040	3406	2766	3636	2718
ENSG00000060982	BCAT1	34	13	33	15	19	17	29	44	29	39	19	23	28	22	28	22	13	26	29	62	40	42	46	35	66	31	51	34	36	68
ENSG00000061273	HDAC7	1845	1308	1385	1469	1118	888	1252	1074	1709	1677	1278	1199	1183	1266	1185	995	917	1241	1065	1263	1842	1831	1545	1330	2167	1750	1509	1497	1725	1590
ENSG00000061337	LZTS1	28	18	9	10	8	6	8	11	17	12	13	16	11	16	9	17	17	28	11	21	33	33	21	24	20	26	26	16	28	18
ENSG00000061455	PRDM6	5	6	1	10	2	3	2	2	3	4	2	2	5	10	0	6	3	2	0	2	0	5	3	6	7	5	5	0	4	3
ENSG00000061492	WNT8A	2	0	0	0	0	0	0	0	0	0	0	0	0	0	0	0	0	0	0	0	0	0	0	0	0	0	0	0	0	0
ENSG00000061656	SPAG4	33	36	34	58	26	23	33	28	47	41	36	25	25	30	28	21	19	35	24	41	32	63	44	34	68	62	29	54	56	46
ENSG00000061676	NCKAP1	3683	2906	3648	3614	2996	2304	2601	2571	4126	4148	2676	2738	3476	2720	2754	3047	2934	3445	3394	4454	6504	6239	4709	4333	5369	4559	4120	3081	4433	6411
ENSG00000061794	MRPS35	3383	2426	2857	3005	2385	1883	2228	2100	3115	3305	2144	2355	2562	2398	2234	2622	2580	3372	2847	3484	4988	5287	3497	3589	4589	4329	3730	3150	4193	4534
ENSG00000061918	GUCY1B1	15	20	18	14	18	15	11	19	14	23	18	14	15	11	16	10	12	13	20	19	17	19	17	10	36	25	20	12	16	20
ENSG00000061936	SFSWAP	1826	1421	1271	1625	1171	900	1315	1174	1989	1746	1438	1344	1368	1499	1261	1368	1196	1416	1435	1228	2472	2383	1837	1865	2239	2263	2075	1654	2168	1766
ENSG00000061938	TNK2	1281	968	950	1031	789	572	921	962	1679	1167	1188	1108	1385	1263	941	816	794	1021	921	858	1682	1506	1440	1219	1756	1528	1188	1245	1455	1209
ENSG00000061987	MON2	3296	2612	2971	3186	2539	2045	2402	2171	3567	3530	2446	2411	2619	2338	2248	2397	2045	2701	2345	3394	4544	4448	3637	3235	4335	3697	3218	2579	3265	4399
ENSG00000062038	CDH3	7	2	0	2	2	3	0	0	0	2	1	0	1	0	0	0	0	0	1	0	2	2	2	1	6	0	0	3	1	4
ENSG00000062096	ARSF	0	0	0	1	0	0	0	0	0	0	0	0	2	0	0	0	0	0	0	0	0	0	0	0	0	0	0	3	1	0
ENSG00000062194	GPBP1	2897	2282	2612	2839	2236	1615	2086	1878	2959	2979	2039	2089	2357	2123	2086	2259	2175	2548	2573	3148	4378	4474	3267	3127	3902	3587	3186	2431	3550	4289
ENSG00000062282	DGAT2	1673	1215	1145	1407	1131	809	1174	895	1467	1477	1085	1123	980	1210	1158	1111	986	1330	1199	1310	1937	2039	1379	1478	2133	1792	1679	1365	1915	1635
ENSG00000062370	ZNF112	153	118	140	158	97	89	105	85	172	148	95	107	131	88	88	76	96	115	88	150	173	183	172	118	209	155	128	126	168	211
ENSG00000062485	CS	14859	10845	10925	13029	9810	7461	10133	8355	13627	13738	10050	9971	10041	10492	10087	10710	9270	11592	11054	11253	19306	19011	13207	13800	16419	16917	15163	11585	15944	13640
ENSG00000062524	LTK	6	4	1	1	2	4	1	2	5	1	1	1	1	0	1	1	2	1	4	1	2	4	3	2	6	4	2	1	3	4
ENSG00000062582	MRPS24	30	15	18	14	17	20	15	23	29	20	16	9	16	15	17	19	15	17	20	21	38	33	14	23	20	25	20	16	29	8
ENSG00000062598	ELMO2	1595	1170	1253	1395	1143	843	1138	1014	1626	1594	1083	1122	1174	1219	1181	1107	879	1143	1069	1201	1884	1762	1380	1327	1963	1840	1541	1296	1525	1487
ENSG00000062650	WAPL	2022	1438	1402	1794	1375	1031	1279	1130	1959	1729	1285	1345	1352	1324	1198	1378	1264	1541	1449	1829	2740	2792	1938	1932	2292	2233	2091	1571	2274	2292
ENSG00000062716	VMP1	4055	3021	3524	3775	2956	2219	2774	2748	4032	4210	2764	2911	3410	2937	2841	3158	2901	4134	3325	4102	5876	5949	4304	4226	5188	4889	4311	3476	4933	5072
ENSG00000062725	APPBP2	1816	1475	1613	1892	1320	1103	1258	1163	1825	1874	1325	1350	1518	1205	1245	1377	1326	1550	1533	2212	2888	2773	2092	2036	2496	2203	1896	1361	2008	2774
ENSG00000062822	POLD1	1385	1156	969	1187	876	711	1079	828	1513	1237	1122	1104	1069	1161	1132	1202	1106	1359	1204	869	2397	2256	1545	1652	1723	2215	1880	1454	2063	1251
ENSG00000063015	SEZ6	8	3	1	0	2	0	5	5	6	0	1	4	1	3	0	3	0	3	3	3	0	3	2	2	7	5	0	1	1	4
ENSG00000063046	EIF4B	28865	21114	23060	24124	19241	14560	19922	19625	28687	28492	20831	21585	25111	22226	21853	21725	19613	30040	23368	25467	42384	42498	35122	31162	43800	36605	33343	30524	36125	36482
ENSG00000063127	SLC6A16	198	153	167	214	197	129	167	169	370	232	197	178	224	182	165	84	83	133	114	183	202	216	199	189	319	145	140	187	151	234
ENSG00000063169	BICRA	698	500	469	521	424	333	446	381	715	633	454	429	478	479	467	428	409	453	438	543	735	704	686	522	832	715	604	547	658	586
ENSG00000063176	SPHK2	722	554	469	582	447	341	464	450	854	676	589	561	539	551	601	402	387	706	477	568	870	939	770	715	1075	833	733	720	744	704
ENSG00000063177	RPL18	15522	11046	11473	12256	9831	7790	10975	9427	13592	13438	9745	10233	10250	10715	10326	9689	8973	17375	10699	12840	16471	18699	12759	13018	20818	18333	16600	15513	17579	16199
ENSG00000063180	CA11	59	75	70	74	53	34	57	53	103	69	70	74	105	88	61	43	38	69	41	64	73	102	102	50	112	99	84	86	82	107
ENSG00000063241	ISOC2	2923	2125	1845	2313	1841	1384	2178	1543	2573	2309	1925	1912	1706	2034	1857	2019	1849	2778	2016	1984	3370	3792	2257	2631	3051	3763	3221	2628	3305	2342
ENSG00000063244	U2AF2	10450	7689	6614	8401	5912	5240	7250	5604	10970	8557	7796	7742	7273	8095	6843	7025	6335	9295	7858	7201	13644	14057	10081	10537	13157	12436	10960	9106	12282	9931
ENSG00000063245	EPN1	8677	6223	5795	6814	5112	4031	6183	4641	7852	7797	5815	5697	5594	6171	5917	5169	4567	7265	5688	6088	9347	9462	7843	7513	10731	9433	8240	7512	9189	7683
ENSG00000063322	MED29	3690	2627	2646	3278	2600	1795	2671	2235	3626	3686	2424	2386	2401	2758	2635	2189	2093	3214	2394	3213	3890	4096	3415	3191	4758	3689	3318	3020	3639	3890
ENSG00000063438	AHRR	37	36	25	24	16	13	30	31	46	27	33	36	25	31	32	19	17	26	18	22	37	39	48	23	55	20	19	31	21	35
ENSG00000063515	GSC2	0	0	0	0	0	0	0	0	0	0	0	0	0	0	0	0	0	0	0	1	0	0	0	0	0	0	0	0	0	0
ENSG00000063587	ZNF275	68	64	80	64	43	45	53	50	73	66	54	53	61	68	41	59	60	39	48	46	98	96	49	62	85	81	74	61	82	75
ENSG00000063601	MTMR1	904	670	712	827	638	493	634	551	841	898	639	560	672	652	609	618	560	652	677	759	1255	1143	869	905	1039	1051	952	639	1010	912
ENSG00000063660	GPC1	985	699	594	789	589	441	648	487	924	885	658	688	643	665	619	486	398	743	592	766	954	980	893	732	1327	840	719	779	864	940
ENSG00000063761	ADCK1	518	354	394	477	361	273	381	293	542	517	344	369	352	346	411	296	251	378	322	351	552	538	442	425	615	530	444	410	488	481
ENSG00000063854	HAGH	1594	1202	1277	1419	1128	831	1171	1056	1531	1461	1085	1073	1155	1193	1218	910	854	1544	985	1258	1695	1698	1291	1287	2200	1675	1521	1498	1651	1538
ENSG00000063978	RNF4	4378	3249	3076	3706	2636	2071	2931	2458	3910	3718	2914	2761	2783	3014	2740	3063	2655	3693	3061	3445	5400	5577	3931	4071	5187	5164	4654	3787	4862	4019
ENSG00000064012	CASP8	698	559	548	578	470	407	475	407	699	686	483	504	537	501	414	468	439	556	527	629	889	909	736	672	802	782	623	590	647	887
ENSG00000064042	LIMCH1	24179	17473	18745	20057	15126	13004	16623	15638	23460	21672	16678	16996	18925	17009	15493	17191	14706	19428	16100	15918	32034	31933	24945	21584	27016	29564	24890	20780	24624	22460
ENSG00000064102	INTS13	1465	1054	1321	1354	1023	868	1009	1026	1426	1484	1037	1052	1266	1087	997	1253	1079	1313	1309	1340	2316	2518	1527	1658	1705	1987	1944	1204	2022	1735
ENSG00000064115	TM7SF3	3248	2234	2617	2720	2276	1721	2154	2089	2962	3048	2115	2220	2367	2185	2239	2108	1805	2626	2260	2838	3984	4015	2957	2901	3921	3486	3209	2594	3354	3469
ENSG00000064195	DLX3	76	41	53	59	46	26	52	39	63	85	38	30	42	66	56	24	14	57	38	62	38	52	50	32	81	47	29	30	33	64
ENSG00000064199	SPA17	397	304	371	321	288	215	295	252	328	387	259	272	305	279	301	259	253	392	291	391	533	539	325	424	567	445	385	317	457	537
ENSG00000064201	TSPAN32	2	0	0	0	1	0	0	0	0	0	1	0	0	0	0	0	0	0	0	0	0	0	1	0	0	1	0	0	0	0
ENSG00000064205	WISP2	5	0	0	0	0	0	0	0	1	0	0	1	0	0	0	0	0	0	0	0	0	0	2	0	0	0	1	0	0	0
ENSG00000064218	DMRT3	2	1	0	1	0	0	1	1	0	0	0	0	0	0	0	0	0	1	0	2	0	0	1	1	0	0	0	0	0	0
ENSG00000064225	ST3GAL6	3	1	0	2	2	2	1	1	2	1	4	8	5	0	2	2	0	1	1	0	3	5	0	2	1	3	1	1	1	2
ENSG00000064270	ATP2C2	699	510	579	573	582	314	458	648	815	782	565	562	684	605	615	532	436	873	510	979	974	1015	1170	745	1995	851	810	963	791	1459
ENSG00000064300	NGFR	7	3	10	5	8	2	1	8	4	10	4	2	2	2	3	5	1	4	5	3	1	4	5	5	11	2	10	6	5	12
ENSG00000064309	CDON	796	556	736	668	576	388	507	588	739	778	490	531	598	574	537	421	394	621	466	758	764	827	921	579	1090	709	658	764	682	927
ENSG00000064313	TAF2	1525	1258	1419	1524	1177	811	1081	1009	1706	1506	1108	1156	1227	1115	999	1174	1022	1147	1186	1529	2227	2233	1638	1477	1854	1873	1628	1178	1732	1891
ENSG00000064393	HIPK2	16481	12360	12376	13132	10661	8529	11372	10263	16883	15826	12219	11540	12740	12483	11050	10649	8977	10805	9941	11139	19695	18497	15571	13217	18180	16954	14191	11873	14240	14470
ENSG00000064419	TNPO3	4273	3178	3272	3820	2851	2203	2897	2426	4147	3940	2909	2970	2864	2928	2770	3241	2849	3544	3235	3448	5831	5942	4040	4019	5151	5160	4676	3456	4987	4431
ENSG00000064489	BORCS8-MEF2B	0	3	2	1	2	0	0	0	2	0	0	0	1	4	1	1	1	0	3	0	4	3	0	1	2	1	2	1	0	1
ENSG00000064490	RFXANK	1341	942	1019	1120	868	636	955	766	1129	1233	833	843	820	867	887	729	692	1190	867	1141	1336	1421	1133	1067	1970	1315	1229	1311	1423	1391
ENSG00000064545	TMEM161A	1199	883	874	951	805	582	836	687	1143	1062	838	758	751	768	815	677	606	1064	692	859	1203	1205	988	907	1446	1264	1038	1192	1135	966
ENSG00000064547	LPAR2	554	422	347	489	329	300	401	235	536	424	371	414	324	370	330	325	297	433	347	352	564	569	421	479	568	634	502	426	564	438
ENSG00000064601	CTSA	1245	865	849	1009	788	621	815	686	1152	1171	742	790	796	811	830	782	609	885	770	1023	1236	1379	1097	1021	1524	1262	1115	931	1242	1155
ENSG00000064607	SUGP2	4541	3448	3509	4268	3264	2335	3272	3015	4919	4334	3370	3048	3117	3424	3090	3210	2748	3768	3363	4341	5867	5914	4737	4430	6610	5396	4892	4355	5132	5443
ENSG00000064651	SLC12A2	2165	1698	1897	2122	1777	1228	1459	1433	2340	2296	1546	1488	1834	1507	1580	1389	1276	1702	1623	2745	2870	2765	2569	2057	3186	2129	1963	1646	2151	3573
ENSG00000064652	SNX24	124	109	122	129	113	87	108	102	127	172	94	104	94	88	85	76	77	113	89	141	137	140	156	109	219	121	130	128	151	179
ENSG00000064655	EYA2	59	44	29	40	42	23	35	27	62	54	41	25	32	39	42	37	24	52	28	53	32	42	43	32	72	43	36	44	37	62
ENSG00000064666	CNN2	2342	1608	1635	1954	1441	1151	1488	1220	2123	2119	1692	1529	1470	1623	1517	1159	1004	1542	1038	1182	1931	1935	1776	1445	1940	1708	1630	1531	1679	1354
ENSG00000064687	ABCA7	1139	917	826	872	749	559	772	739	1380	982	960	891	911	966	838	618	575	779	693	640	1169	1209	1067	930	1457	1212	980	881	1037	972
ENSG00000064692	SNCAIP	4	0	3	0	2	2	0	1	2	0	0	1	2	1	2	0	0	0	0	2	0	0	0	0	2	0	0	3	0	2
ENSG00000064703	DDX20	1201	905	1053	1112	826	676	808	698	1248	1211	890	910	910	846	752	1011	934	957	1060	1275	2073	1901	1337	1442	1421	1678	1413	962	1579	1520
ENSG00000064726	BTBD1	2674	2024	2182	2443	1948	1502	1778	1710	2627	2709	1867	1931	2186	1854	1853	2098	1990	2325	2318	2783	4085	3987	2881	2993	3376	3034	3040	2269	3238	3620
ENSG00000064763	FAR2	15	10	5	15	5	7	5	8	11	10	4	6	7	8	9	4	5	4	5	20	20	15	14	13	8	7	9	6	10	16
ENSG00000064787	BCAS1	44	36	24	35	30	30	43	32	51	53	29	32	39	37	32	19	12	29	8	32	44	45	38	18	65	26	30	39	38	25
ENSG00000064835	POU1F1	0	0	0	0	0	0	0	0	0	0	0	0	0	0	0	0	0	0	0	0	0	0	0	0	0	0	0	0	0	0
ENSG00000064886	CHI3L2	0	0	0	1	1	0	0	0	0	1	0	0	0	1	0	0	1	1	0	0	0	1	0	3	0	0	1	0	1	1
ENSG00000064932	SBNO2	4052	3198	2596	3191	2424	1981	3003	2414	4924	3835	3596	3411	3467	3610	3224	2729	2410	3118	2881	2211	5417	5399	4194	4197	5065	5244	4169	3443	4650	3591
ENSG00000064933	PMS1	722	533	629	663	539	447	485	448	765	649	543	483	651	431	429	563	578	621	606	744	1139	1180	903	873	730	886	767	568	797	948
ENSG00000064961	HMG20B	5618	4045	3786	4510	3641	2768	3924	3190	5179	4752	3442	3641	3408	3657	3579	3364	3170	4357	3461	4010	5938	6170	4393	4600	6580	6199	5430	4828	5778	4882
ENSG00000064989	CALCRL	5	11	13	7	4	3	7	2	7	11	3	6	11	5	2	8	11	7	5	8	16	13	3	10	11	6	10	6	9	17
ENSG00000064995	TAF11	1052	833	854	935	698	589	754	641	1036	1003	721	776	795	685	626	732	721	958	848	1006	1404	1453	946	1101	1275	1199	1172	897	1322	1354
ENSG00000064999	ANKS1A	1616	1206	1158	1394	1099	813	1153	925	1707	1509	1230	1110	1136	1271	1145	1003	926	1212	1074	1157	1911	1980	1611	1441	1947	1744	1525	1244	1601	1510
ENSG00000065000	AP3D1	7622	5826	4932	6210	4644	3843	5440	4527	8701	7297	6302	6242	6312	6771	5784	5671	5102	6761	5947	4975	11074	10809	8875	8000	10737	10197	8762	7004	9088	7756
ENSG00000065029	ZNF76	1144	865	804	971	717	526	794	744	1166	1040	740	780	815	799	783	770	681	1068	849	947	1542	1458	1177	1058	1643	1382	1203	1055	1362	1280
ENSG00000065054	SLC9A3R2	2641	1842	1527	1973	1353	1236	1919	1239	2525	2066	1739	1876	1525	1835	1734	1874	1635	2118	1739	1259	3521	3411	2214	2474	2725	3461	2896	2093	2972	1877
ENSG00000065057	NTHL1	628	383	403	481	359	251	386	300	521	482	390	398	349	404	330	432	411	631	460	423	818	884	504	642	748	781	738	654	723	599
ENSG00000065060	UHRF1BP1	3494	2673	3491	3103	3315	1733	2339	2708	3499	4705	2518	2387	3257	2605	3167	2739	2443	3677	2783	4386	5054	5006	4572	3704	6143	4237	3831	3740	4213	5291
ENSG00000065135	GNAI3	2940	2184	2185	2595	1939	1569	1933	1601	2710	2580	1980	1905	2095	1939	1795	2276	2157	2523	2400	2541	4521	4689	2962	3034	3143	3717	3316	2222	3549	3572
ENSG00000065150	IPO5	7130	5514	6204	6478	5186	3815	4855	4549	7074	7245	5039	5090	5870	5063	5255	6237	5669	6258	6512	6509	11684	11932	7929	7930	8573	9918	8810	6286	9649	8373
ENSG00000065154	OAT	148	129	135	122	99	92	96	106	136	142	96	96	123	106	112	113	116	125	128	159	216	236	140	148	208	205	179	149	209	171
ENSG00000065183	WDR3	4898	3698	3670	4371	3238	2711	3330	2818	4949	4632	3553	3555	3569	3545	3189	4099	3523	3928	4115	3963	7580	7736	4929	5144	5658	6699	6020	4074	6592	5482
ENSG00000065243	PKN2	2070	1670	1996	2162	1848	1190	1491	1402	2311	2418	1480	1515	1823	1474	1588	1513	1533	1543	1746	2209	2975	3096	2414	2329	2738	2408	2332	1711	2291	3065
ENSG00000065268	WDR18	1515	1156	1058	1273	1051	790	1162	920	1387	1402	1014	1042	993	1013	1108	1073	920	1699	1072	1375	1744	2012	1507	1427	2263	1894	1586	1637	1809	1559
ENSG00000065308	TRAM2	845	597	521	713	537	398	539	430	808	662	577	575	457	578	458	539	412	598	549	581	973	856	699	649	897	839	747	568	847	724
ENSG00000065320	NTN1	21	8	10	10	6	5	6	8	11	7	13	14	13	11	9	4	5	9	7	3	7	8	9	5	19	9	7	4	12	8
ENSG00000065325	GLP2R	6	1	2	0	9	1	0	1	2	9	2	1	3	1	2	3	2	0	1	0	6	4	6	1	2	9	5	0	1	4
ENSG00000065328	MCM10	2629	2010	1653	2192	1543	1341	1734	1171	2496	2103	1782	1867	1473	1771	1516	2525	2173	2132	2440	1613	4564	4632	2624	3140	2449	4209	3625	2161	3953	2239
ENSG00000065357	DGKA	200	168	150	160	135	115	143	129	226	205	132	125	142	142	105	137	129	182	133	185	209	233	205	172	306	264	177	158	181	204
ENSG00000065361	ERBB3	6891	5438	5823	6293	5547	3391	4944	4891	6849	7797	4813	4783	5571	5206	5595	4429	3836	5786	4439	6506	7905	7691	6996	5819	10569	7362	6577	6350	6827	8165
ENSG00000065371	ROPN1	5	0	0	0	1	0	1	0	2	0	0	0	0	0	0	0	0	1	2	1	0	2	0	0	3	0	0	0	1	3
ENSG00000065413	ANKRD44	686	570	543	621	436	372	514	397	699	659	442	477	413	511	443	396	365	484	411	550	692	773	599	534	800	673	557	477	636	697
ENSG00000065427	KARS	8645	6267	6422	7310	5657	4399	5824	4985	7850	8307	5679	6089	6176	6262	5836	6218	5693	7859	6656	7088	11305	11752	7891	8200	10658	10706	9458	7319	10383	8983
ENSG00000065457	ADAT1	1524	1102	1207	1405	1060	738	1130	932	1570	1495	1025	1058	1061	1099	1053	1091	984	1202	1137	1286	2027	1963	1419	1396	1860	1771	1625	1262	1598	1663
ENSG00000065485	PDIA5	2049	1541	1436	1710	1128	1006	1445	1156	1895	1645	1514	1375	1376	1461	1188	1419	1183	1439	1224	1045	2440	2432	1697	1596	1746	2231	1970	1609	1896	1421
ENSG00000065491	TBC1D22B	556	458	489	465	439	273	406	358	557	598	368	433	371	401	389	364	337	506	357	506	676	670	554	447	771	577	525	516	560	579
ENSG00000065518	NDUFB4	16699	11831	12765	14126	11294	8650	11603	10062	15057	15674	10254	10920	11571	11877	11369	9471	8849	16572	11787	16789	17159	18888	14038	14021	24726	16470	15230	13982	18188	21531
ENSG00000065526	SPEN	5801	4266	4053	4759	3643	2858	3921	3462	6201	5256	4405	4004	3964	4424	3534	4161	3425	3738	3869	3572	7212	7094	5549	5013	6190	6650	5819	4363	5542	4836
ENSG00000065534	MYLK	563	440	445	487	455	264	339	362	624	660	434	378	487	436	465	226	208	374	273	535	445	421	499	416	1172	357	347	416	410	873
ENSG00000065548	ZC3H15	2168	1652	1774	2008	1379	1333	1489	1287	2256	2075	1533	1658	1663	1561	1306	1856	1839	1995	2110	2118	3677	3891	2368	2567	2748	3089	2722	1873	3032	2946
ENSG00000065559	MAP2K4	2288	1654	1889	1980	1561	1279	1519	1275	2133	2231	1487	1514	1792	1538	1529	1654	1534	1826	1809	2288	3073	3183	2303	2179	2928	2584	2305	1707	2579	2946
ENSG00000065600	TMEM206	533	442	416	459	348	338	383	369	543	490	340	385	409	385	364	355	310	465	387	508	617	682	540	477	683	548	518	485	573	582
ENSG00000065609	SNAP91	23	15	11	13	16	9	7	8	16	16	9	11	17	7	15	5	8	9	10	17	11	16	28	12	32	9	14	10	16	22
ENSG00000065613	SLK	2499	1987	2095	2305	1902	1407	1716	1708	2595	2601	1775	1853	2033	1849	1755	1923	1672	1853	1934	2096	3369	3470	2769	2534	2981	2886	2533	2026	2743	2959
ENSG00000065615	CYB5R4	257	207	273	249	221	147	198	153	303	260	183	164	210	206	194	171	165	210	198	263	390	336	266	249	265	275	217	178	304	314
ENSG00000065618	COL17A1	24	9	11	7	10	8	14	6	18	22	11	12	13	11	8	2	5	7	7	3	14	7	5	2	17	5	13	7	9	6
ENSG00000065621	GSTO2	111	85	99	94	111	72	70	81	129	150	87	78	94	62	81	89	70	118	82	185	170	139	103	128	186	149	139	123	153	206
ENSG00000065665	SEC61A2	307	275	273	313	248	155	191	225	358	310	234	243	200	201	209	257	209	275	245	384	436	460	363	333	493	396	325	287	364	479
ENSG00000065675	PRKCQ	2	0	1	0	0	0	0	0	0	0	0	0	0	0	0	0	0	0	0	0	0	1	0	1	0	0	1	0	0	1
ENSG00000065717	TLE2	559	398	430	416	396	255	420	350	592	554	384	393	418	390	443	327	265	429	302	497	537	535	563	437	798	528	482	504	431	586
ENSG00000065802	ASB1	1288	975	876	1075	752	682	883	848	1435	1090	1007	925	979	979	860	769	740	924	826	870	1575	1540	1272	1136	1594	1376	1155	1009	1247	1327
ENSG00000065809	FAM107B	1234	915	1182	1133	888	578	787	886	1176	1208	797	874	1214	807	883	849	774	1147	1002	1298	1726	1736	1369	1156	1670	1387	1317	1096	1488	1678
ENSG00000065833	ME1	1651	1194	1482	1569	1261	976	1110	1186	1696	1852	1107	1125	1530	1215	1204	926	894	1851	1046	2200	2014	1796	2212	1407	3245	1536	1462	1689	1509	3119
ENSG00000065882	TBC1D1	4004	2734	3062	3208	2227	2002	2618	2234	3530	3156	2681	2593	2643	2510	2253	2838	2368	3071	2690	2761	4927	4937	3547	3232	3938	4855	3916	3159	3866	3323
ENSG00000065883	CDK13	2178	1591	1615	1833	1404	1175	1459	1466	2462	2195	1672	1641	1838	1744	1560	1392	1275	1726	1477	1619	2879	2797	2281	2156	2790	2370	2149	1698	2117	2477
ENSG00000065911	MTHFD2	3681	2705	4388	3031	3851	1985	2515	3417	3329	5126	2425	2566	4302	2541	3787	3612	3349	6493	3932	8129	6938	6819	7377	5026	11477	5657	5326	6513	6030	10611
ENSG00000065923	SLC9A7	1751	1351	1545	1497	1362	917	1217	1142	1867	2024	1157	1216	1436	1251	1344	1036	910	1465	1180	1839	1900	1971	1937	1506	2815	1738	1536	1567	1688	2305
ENSG00000065970	FOXJ2	1907	1420	1395	1658	1421	965	1301	1056	1855	1802	1355	1262	1291	1349	1316	1382	1180	1472	1393	1659	2415	2252	1859	1819	2357	2132	1882	1477	1941	2008
ENSG00000065978	YBX1	25725	18384	18995	21116	16398	12639	18229	14630	23415	23702	16438	17350	18424	17884	17256	18418	16733	25542	20338	22009	34267	34980	24194	25669	34119	32220	28944	23087	31292	27606
ENSG00000065989	PDE4A	153	134	101	130	83	80	88	59	168	147	121	115	72	110	109	114	94	99	147	101	197	199	115	136	170	226	170	137	220	112
ENSG00000066027	PPP2R5A	1206	918	1059	1214	887	728	806	784	1250	1211	896	879	994	858	847	809	826	1088	966	1272	1669	1729	1279	1278	1604	1238	1245	1142	1348	1715
ENSG00000066032	CTNNA2	11	5	14	6	4	6	4	4	11	14	8	8	6	12	9	10	5	11	9	3	21	13	4	5	5	28	13	4	12	4
ENSG00000066044	ELAVL1	5721	4286	4024	5165	3838	3003	4178	3189	5476	5593	3879	4037	3825	4267	3954	4459	3844	5067	4798	4823	8236	8091	5776	5885	7230	7107	6415	4895	7053	6075
ENSG00000066056	TIE1	7	0	0	0	1	0	0	0	0	0	0	0	0	0	0	0	0	0	0	1	0	0	0	1	0	0	0	0	0	0
ENSG00000066084	DIP2B	3453	2659	2969	3009	2665	1804	2393	2267	3427	3699	2313	2262	2724	2552	2701	2381	2013	2747	2637	3444	4438	4479	3506	3270	4883	3904	3420	2823	3864	4387
ENSG00000066117	SMARCD1	2478	1745	1698	2146	1564	1111	1654	1357	2234	2219	1564	1539	1553	1637	1516	1542	1302	1767	1597	1833	2745	2753	2177	2050	2914	2539	2240	1900	2366	2324
ENSG00000066135	KDM4A	3303	2571	3018	2734	2476	1646	2317	2632	3441	3711	2461	2255	3082	2464	2743	2010	1899	3145	2172	3232	3774	3673	3986	2944	5953	3404	3226	3418	3394	4926
ENSG00000066136	NFYC	2445	1744	1858	2063	1565	1169	1734	1510	2102	2243	1673	1565	1655	1692	1582	1489	1279	2012	1549	2034	2663	2789	2170	1983	3145	2541	2423	1943	2441	2332
ENSG00000066185	ZMYND12	109	90	125	117	111	78	86	91	137	134	102	84	112	92	126	71	90	162	104	181	127	152	185	130	312	149	137	169	161	198
ENSG00000066230	SLC9A3	21	10	6	8	12	7	13	8	16	5	6	11	10	7	5	12	8	9	17	10	12	14	16	9	13	23	11	17	14	9
ENSG00000066248	NGEF	261	209	180	239	183	145	178	156	260	235	180	180	172	176	204	157	138	228	196	271	319	312	279	216	449	306	273	286	297	316
ENSG00000066279	ASPM	1559	1263	1378	1616	1245	876	1116	939	1731	1573	1130	1127	1202	1079	985	1518	1448	1096	1716	1826	3301	2973	1954	2354	1777	2109	1971	1101	1877	2416
ENSG00000066294	CD84	5	0	0	1	0	0	0	2	0	0	0	2	0	0	0	0	0	0	0	0	0	0	0	0	0	0	0	0	0	0
ENSG00000066322	ELOVL1	4564	3069	2890	3686	2788	2214	2968	2249	3864	3837	2951	3056	2713	3120	2794	2811	2530	3713	3060	2810	5263	5581	3448	3666	4424	4960	4393	3281	4682	3475
ENSG00000066336	SPI1	4	3	7	0	5	1	4	1	8	1	0	0	4	0	5	3	1	2	2	4	1	3	1	2	7	4	5	4	5	3
ENSG00000066379	ZNRD1	320	217	244	260	221	145	207	176	278	280	186	217	212	222	219	197	186	270	221	220	327	380	246	301	397	394	321	289	368	300
ENSG00000066382	MPPED2	2	0	1	0	0	0	0	0	0	0	0	1	0	0	0	0	0	0	1	0	0	0	0	0	1	0	0	0	0	0
ENSG00000066405	CLDN18	1	0	0	3	0	0	0	0	0	0	0	0	0	0	0	0	0	0	0	0	0	0	0	0	0	0	0	0	0	0
ENSG00000066422	ZBTB11	1911	1331	1585	1805	1330	1039	1287	1148	1946	1875	1308	1287	1481	1301	1202	1301	1279	1559	1538	1808	2578	2504	2072	1903	2427	2148	2086	1461	2010	2432
ENSG00000066427	ATXN3	663	434	530	581	441	339	448	466	678	665	426	481	509	505	452	424	396	514	462	699	877	853	717	638	925	690	620	541	755	832
ENSG00000066455	GOLGA5	1611	1231	1360	1417	1184	897	1145	1072	1583	1720	1155	1097	1322	1175	1144	1181	1051	1509	1256	1700	2153	2178	1777	1438	2425	1822	1745	1483	1850	2244
ENSG00000066468	FGFR2	73	32	35	58	40	22	31	37	44	51	39	43	54	30	27	42	29	56	34	86	72	63	88	35	120	56	63	72	39	92
ENSG00000066557	LRRC40	591	433	591	604	474	365	374	437	599	633	434	389	539	436	417	543	530	523	636	830	1144	1136	757	810	754	803	700	475	767	1034
ENSG00000066583	ISOC1	1166	827	902	993	756	635	814	743	1115	1051	774	822	817	793	833	850	800	1045	904	961	1647	1671	1083	1224	1240	1368	1296	880	1399	1163
ENSG00000066629	EML1	971	742	789	880	755	479	654	604	938	955	721	660	690	737	699	576	483	738	624	759	1074	1063	851	730	1164	923	867	753	778	956
ENSG00000066651	TRMT11	453	331	433	431	345	290	316	307	528	450	368	346	393	328	322	349	375	418	396	412	737	699	540	544	520	566	568	353	539	578
ENSG00000066654	THUMPD1	3062	2301	2491	2891	2081	1762	2108	1742	2876	2864	2144	2275	2349	2063	1836	2339	2148	2271	2381	2632	4677	4634	3207	2968	3062	3830	3284	2192	3409	3504
ENSG00000066697	MSANTD3	509	343	393	494	336	246	310	288	474	469	346	338	387	354	343	293	271	423	352	415	581	625	456	412	580	429	497	469	479	514
ENSG00000066735	KIF26A	10	8	3	12	1	9	5	2	7	8	12	7	5	5	3	3	7	1	9	1	13	12	18	10	1	8	10	4	9	4
ENSG00000066739	ATG2B	2166	1683	2342	2081	1976	1298	1524	1643	2326	2630	1590	1542	1971	1594	1748	1437	1179	1766	1507	2402	2661	2666	2576	1861	3171	2169	1960	1863	2105	3262
ENSG00000066777	ARFGEF1	4265	3363	3841	4081	3398	2521	2812	2839	4706	4470	3127	3079	3334	3132	2958	2806	2652	2869	2914	3912	5483	5438	4519	3827	5198	4421	3954	3124	4146	5301
ENSG00000066813	ACSM2B	2	0	3	0	0	0	0	0	0	0	0	0	0	0	0	0	0	0	0	0	0	1	0	0	2	0	0	2	0	0
ENSG00000066827	ZFAT	559	406	440	489	372	307	412	350	557	511	391	411	381	417	369	372	351	479	373	451	637	667	550	484	736	682	586	494	602	553
ENSG00000066855	MTFR1	2174	1586	1840	2052	1714	1191	1555	1478	2172	2468	1422	1629	1804	1602	1626	1615	1456	1971	1867	2534	3055	3269	2421	2286	3246	2530	2467	2057	2691	3115
ENSG00000066923	STAG3	33	17	18	29	15	14	22	11	24	32	13	17	12	7	20	27	12	21	25	27	17	37	25	13	36	20	30	28	21	24
ENSG00000066926	FECH	7035	5350	5703	6212	4746	3912	5023	4582	6554	6865	4898	5088	5339	5247	5023	4584	4033	6307	4557	5522	8166	8445	6750	5736	8730	7520	6610	6095	7170	7459
ENSG00000066933	MYO9A	1870	1483	1686	1800	1375	1039	1407	1412	2003	2148	1369	1267	1426	1385	1377	1244	1094	1401	1221	1672	2287	2246	2178	1612	2462	1983	1822	1553	1712	2338
ENSG00000067048	DDX3Y	1367	1041	1212	1231	914	788	937	928	1520	1282	1071	1029	1172	1096	942	1117	1042	1154	1066	1139	2066	2187	1575	1453	1565	1816	1573	1134	1683	1553
ENSG00000067057	PFKP	2126	1563	1319	1720	1254	1002	1493	1156	2007	1920	1513	1604	1422	1703	1585	1445	1320	1981	1542	1368	2670	2712	2157	2035	2528	2428	2241	1836	2427	1835
ENSG00000067064	IDI1	1488	1091	1299	1319	1095	859	1033	968	1432	1480	1050	1030	1318	1058	1089	1163	1073	1280	1290	1733	2509	2310	1419	1699	2142	1862	1655	1121	1846	2445
ENSG00000067066	SP100	152	95	124	126	123	98	109	113	144	160	87	106	108	100	135	80	74	137	95	187	127	160	189	92	248	169	160	155	124	166
ENSG00000067082	KLF6	349	277	374	292	365	182	205	332	314	426	239	233	345	217	291	219	195	338	239	386	481	418	381	324	515	340	315	309	343	454
ENSG00000067113	PLPP1	4945	3620	3538	4168	2955	2624	3339	2727	4412	3905	3254	3311	3338	3355	2990	3945	3774	4891	3912	3748	7634	7748	5174	5467	5332	6706	5836	4550	6158	4738
ENSG00000067141	NEO1	3274	2529	2636	2913	2375	1644	2341	2004	3196	3415	2194	2137	2355	2256	2391	2104	1692	2577	2048	3135	3611	3456	3214	2666	4645	3063	2897	2814	3033	3803
ENSG00000067167	TRAM1	1489	1182	1426	1532	1252	932	996	1004	1607	1691	1117	1153	1315	1119	1144	1283	1281	1779	1489	2382	2934	2631	2146	2174	2458	1937	1667	1317	1882	3262
ENSG00000067177	PHKA1	894	621	601	734	542	448	581	542	879	808	590	591	583	627	580	545	434	691	572	684	980	996	821	693	1082	906	813	762	928	889
ENSG00000067182	TNFRSF1A	2278	1698	1847	1935	1691	1024	1681	1385	2045	2257	1545	1582	1719	1546	1687	1329	1212	2164	1367	1940	2460	2488	2216	1775	3360	2237	2179	2066	2268	2545
ENSG00000067191	CACNB1	189	138	127	140	133	84	130	135	235	182	121	120	109	140	103	73	75	134	83	137	181	194	172	150	280	166	150	156	163	152
ENSG00000067208	EVI5	1369	1013	1156	1283	1025	776	1010	925	1443	1436	950	950	1138	941	1006	865	730	1091	960	1464	1615	1737	1425	1163	1892	1404	1207	1197	1267	1903
ENSG00000067221	STOML1	525	388	403	440	385	221	325	335	512	499	329	354	346	363	383	329	316	494	343	406	559	680	445	469	608	596	581	473	585	482
ENSG00000067225	PKM	41080	30237	28242	34722	25661	19848	29007	23683	39371	37683	28444	29573	29400	31720	29828	28040	25029	37815	30395	28862	51564	53990	37705	39771	52364	49912	44613	36236	47619	39585
ENSG00000067248	DHX29	1741	1386	1510	1772	1256	1010	1251	1030	1785	1847	1310	1301	1425	1271	1210	1347	1329	1517	1592	1859	2545	2692	2007	1917	2349	2194	2124	1417	2190	2656
ENSG00000067334	DNTTIP2	2777	2069	2210	2655	1827	1613	1771	1656	2902	2607	1921	1980	2169	1965	1755	2278	2300	2357	2694	2357	4354	4650	3027	3201	3490	4058	3624	2223	3713	3352
ENSG00000067365	METTL22	706	550	498	535	465	328	510	414	666	659	481	501	462	468	460	465	379	653	471	565	902	906	703	614	868	797	760	655	812	687
ENSG00000067369	TP53BP1	3047	2316	2414	2673	2122	1633	2067	1960	3196	2833	2192	2067	2290	2311	2077	2138	1764	2257	2105	2352	3491	3573	3008	2586	3985	3417	2984	2550	3158	3326
ENSG00000067445	TRO	4	1	2	2	0	0	0	0	1	0	0	0	0	0	0	0	0	1	0	1	1	0	0	0	1	0	0	0	0	0
ENSG00000067533	RRP15	1100	856	786	979	679	636	781	641	1055	947	773	799	783	800	716	887	823	890	882	948	1730	1750	999	1184	1233	1506	1287	857	1451	1156
ENSG00000067560	RHOA	12081	8797	9354	10248	7846	6089	8305	7363	11017	11267	7904	8170	8644	8750	8467	8305	7420	10579	8904	9843	14873	15703	10621	11279	14871	13342	12429	10660	13570	12214
ENSG00000067596	DHX8	2873	2129	2151	2457	1887	1413	1921	1894	2744	2702	2049	2081	2162	2158	2069	1925	1644	2410	2063	2275	3663	3529	2733	2573	4042	3176	2945	2410	3079	3055
ENSG00000067601	PMS2P4	361	289	280	297	228	200	248	261	410	356	265	265	291	265	240	228	186	293	248	298	358	378	339	275	476	358	318	331	347	382
ENSG00000067606	PRKCZ	1353	995	977	1100	825	639	999	845	1372	1232	936	988	1014	1072	977	747	668	1145	815	1017	1416	1330	1277	1077	1881	1300	1132	1210	1315	1319
ENSG00000067646	ZFY	511	380	533	490	366	275	359	370	573	596	375	359	448	368	399	372	333	436	391	535	666	690	607	512	701	549	590	406	542	778
ENSG00000067704	IARS2	4881	3925	4176	4718	3731	2682	3403	3287	4866	5075	3390	3372	3991	3652	3697	3846	3554	4491	4216	5225	7359	7214	5561	5208	6795	6171	5607	4266	6242	6585
ENSG00000067715	SYT1	12	9	9	7	5	7	7	5	9	6	6	6	4	7	2	3	1	12	1	8	9	1	9	9	5	8	6	5	7	11
ENSG00000067798	NAV3	1887	1416	1679	1666	1386	954	1217	1242	1812	1844	1263	1135	1346	1179	1243	1301	1143	975	1387	1058	2406	2397	1365	1676	1532	2150	1792	996	1981	1426
ENSG00000067829	IDH3G	1791	1235	1270	1436	1021	891	1243	963	1531	1619	1102	1151	1092	1256	1157	996	837	1471	1054	1307	1576	1845	1351	1280	1924	1669	1508	1330	1705	1493
ENSG00000067836	ROGDI	1905	1329	1318	1545	1214	906	1361	1134	1707	1649	1252	1258	1252	1268	1255	900	834	1736	1109	1479	1740	1864	1520	1341	2490	1744	1570	1767	1642	1688
ENSG00000067840	PDZD4	8	12	8	12	11	9	11	8	38	13	25	24	24	23	9	10	11	17	11	9	32	20	26	29	34	27	12	9	22	7
ENSG00000067842	ATP2B3	0	0	0	0	0	0	0	0	0	0	0	0	1	0	0	0	0	0	0	0	0	0	0	0	0	0	0	0	0	0
ENSG00000067900	ROCK1	2719	2105	2435	2627	2201	1548	1880	1975	3108	3164	2212	2137	2485	2159	2079	1918	1821	2107	2227	2540	4034	3755	3377	3075	3726	3077	2827	2166	2836	3735
ENSG00000067955	CBFB	1736	1364	1470	1645	1235	931	1230	1120	1797	1736	1276	1331	1341	1333	1281	1435	1198	1466	1500	1601	2933	2687	1821	2070	2111	2034	1848	1450	2095	2227
ENSG00000067992	PDK3	1007	782	837	888	737	561	701	576	1070	1041	695	736	725	680	761	801	769	894	898	983	1525	1548	1134	1064	1365	1119	1119	870	1260	1205
ENSG00000068001	HYAL2	326	234	244	253	202	163	237	194	299	268	218	203	179	236	194	176	200	286	239	249	354	373	298	302	390	355	347	318	373	345
ENSG00000068024	HDAC4	778	565	587	605	556	348	515	483	775	691	531	535	547	548	574	489	439	546	517	635	926	928	834	708	1135	831	707	629	766	827
ENSG00000068028	RASSF1	525	360	343	394	300	246	341	310	521	409	335	261	329	351	309	314	312	402	325	325	556	593	430	421	512	643	527	445	521	460
ENSG00000068078	FGFR3	315	256	221	279	184	163	196	194	352	267	269	246	257	264	254	169	156	199	183	102	333	342	234	281	204	329	277	184	244	179
ENSG00000068079	IFI35	85	55	46	67	44	36	40	64	56	72	51	56	57	59	68	35	35	89	47	77	69	91	73	52	124	69	66	103	72	97
ENSG00000068097	HEATR6	1252	952	1104	1206	963	631	921	850	1278	1365	941	865	992	975	922	950	767	1058	857	1236	1611	1714	1331	1157	1748	1452	1359	1082	1391	1458
ENSG00000068120	COASY	3189	2262	2134	2657	1930	1543	2226	1728	2868	2964	2247	2138	1982	2223	2111	2061	1870	2832	2243	2298	3866	3935	3035	2855	3833	3969	3364	2970	3459	2991
ENSG00000068137	PLEKHH3	2515	1714	1766	1913	1622	1208	1697	1535	2401	2250	1770	1544	1710	1740	1746	1257	1223	2153	1490	1768	2401	2383	2363	1963	3353	2419	1979	2416	2280	2301
ENSG00000068305	MEF2A	1352	1049	1243	1213	1193	771	937	982	1374	1509	883	918	1077	876	1086	805	736	1120	946	1461	1567	1584	1462	1240	1982	1286	1117	1089	1265	1890
ENSG00000068308	OTUD5	681	541	533	594	467	370	497	431	623	675	512	439	512	549	468	424	375	583	406	479	772	696	626	579	916	645	616	623	662	678
ENSG00000068323	TFE3	611	511	470	537	463	338	467	420	611	727	459	433	451	451	493	327	296	602	391	536	700	697	657	474	928	610	606	576	630	721
ENSG00000068354	TBC1D25	106	91	121	130	92	85	98	89	112	119	92	90	93	106	101	71	70	122	105	113	137	152	132	130	186	173	149	135	134	139
ENSG00000068366	ACSL4	130	105	121	129	122	63	75	92	122	118	87	70	119	102	98	130	117	166	123	184	230	218	223	190	323	169	172	164	200	292
ENSG00000068383	INPP5A	1946	1455	1421	1766	1433	1050	1350	1193	1786	1979	1276	1320	1304	1520	1477	1151	1047	1822	1360	1781	2215	2276	1819	1731	2846	1925	1809	1712	2002	2294
ENSG00000068394	GPKOW	488	367	380	487	323	274	368	279	508	453	345	374	317	355	319	325	265	486	365	383	557	741	499	474	701	652	523	488	567	526
ENSG00000068400	GRIPAP1	593	438	358	473	343	267	419	389	898	475	598	637	689	688	577	396	383	556	371	323	837	790	867	578	1066	738	574	596	668	728
ENSG00000068438	FTSJ1	897	647	609	697	558	472	654	457	755	881	568	617	530	638	623	750	607	815	743	676	1194	1311	819	938	1119	1206	1023	830	1114	866
ENSG00000068489	PRR11	2350	1654	1726	1983	1497	1154	1578	1365	2259	2113	1628	1542	1494	1687	1430	1925	1720	1717	2047	1966	3487	3517	2086	2553	2565	2958	2728	1620	2837	2185
ENSG00000068615	REEP1	96	68	80	97	76	47	48	64	93	95	52	54	66	68	73	37	49	76	65	139	94	102	84	78	153	80	80	69	113	168
ENSG00000068650	ATP11A	2112	1643	1649	1911	1398	1075	1441	1248	2265	1966	1483	1421	1520	1592	1468	1413	1222	1739	1522	2177	2679	2692	2494	2035	3286	2242	2073	1975	2347	2614
ENSG00000068654	POLR1A	6404	4668	4024	5344	3736	3168	4343	3497	6931	5748	4963	4769	4629	5091	4280	4760	4116	4402	4796	3990	9024	8610	6277	6420	7418	7519	6515	4874	6552	5635
ENSG00000068697	LAPTM4A	2946	2259	2598	2808	2260	1681	2106	1990	2963	2963	2059	2161	2504	2186	2132	2149	2212	3450	2781	3806	4711	4537	3410	3444	4589	3317	3295	2749	3379	4816
ENSG00000068724	TTC7A	243	177	188	205	158	125	142	174	236	265	168	183	183	160	168	157	150	175	157	179	291	311	221	178	278	240	230	209	244	241
ENSG00000068745	IP6K2	4613	3330	3728	3921	3347	2259	3155	3094	4496	4327	3058	3031	3253	3096	3091	2493	2382	3993	2892	4309	4688	4763	4325	3658	6533	4492	3870	3955	4242	5236
ENSG00000068781	STON1-GTF2A1L	0	0	0	0	0	0	0	0	0	0	0	0	0	0	0	0	0	0	0	0	0	0	0	0	0	0	0	0	0	0
ENSG00000068784	SRBD1	706	502	589	621	529	401	509	473	729	756	515	478	575	542	478	604	512	651	616	730	1071	1212	826	765	1016	1027	921	651	1003	933
ENSG00000068796	KIF2A	1579	1247	1303	1507	1133	889	1125	924	1673	1631	1178	1086	1322	1207	1077	1277	1136	1414	1423	1700	2356	2358	1819	1712	2068	1903	1780	1374	1992	2120
ENSG00000068831	RASGRP2	2	2	2	0	3	2	4	4	2	1	2	1	3	2	3	3	2	4	2	3	10	4	0	0	6	1	1	1	1	2
ENSG00000068878	PSME4	5240	4259	4594	4957	3866	3039	3801	3487	5609	5600	3822	3855	4324	3862	3732	3952	3630	4132	4163	4656	7584	7237	5872	5297	6417	6094	5355	4236	5767	6388
ENSG00000068885	IFT80	325	246	330	317	279	207	238	216	348	386	238	218	309	250	225	274	233	288	286	508	518	541	447	366	531	404	393	310	430	610
ENSG00000068903	SIRT2	1948	1441	1418	1616	1371	1028	1474	1225	1903	2036	1375	1367	1343	1421	1463	1040	978	1798	1143	1710	1848	1926	1858	1507	2860	1875	1751	1819	1784	2168
ENSG00000068912	ERLEC1	803	673	703	840	645	503	579	521	803	864	572	581	657	625	552	503	527	816	648	984	1249	1219	900	793	1216	883	785	726	920	1444
ENSG00000068971	PPP2R5B	610	441	434	521	437	289	437	398	580	596	421	395	384	437	422	236	262	572	324	564	459	557	544	430	975	427	455	600	487	688
ENSG00000068976	PYGM	42	30	26	36	33	18	37	22	77	35	37	29	38	38	31	26	30	25	26	25	61	65	49	46	58	48	47	41	46	52
ENSG00000068985	PAGE1	33	18	18	36	22	20	21	28	31	19	21	22	19	25	16	19	15	29	23	42	53	40	28	23	57	46	30	25	39	30
ENSG00000069011	PITX1	3305	2414	2361	2718	2372	1600	2398	1837	3221	3201	2234	2267	2107	2339	2454	1939	1868	3287	2369	2770	3716	3727	3209	3144	4747	3608	3354	3253	3625	3404
ENSG00000069018	TRPC7	1	0	0	0	0	0	0	1	0	0	0	1	0	2	0	0	1	0	0	1	2	0	0	1	0	0	2	0	0	0
ENSG00000069020	MAST4	1834	1344	1438	1550	1326	916	1210	1141	1847	1954	1183	1148	1219	1214	1225	1038	870	1212	1065	1723	1850	1869	1613	1552	2544	1631	1451	1356	1662	2260
ENSG00000069122	ADGRF5	2	1	0	2	1	0	0	0	1	4	0	0	0	0	0	1	1	0	0	0	2	0	0	1	0	0	1	1	1	0
ENSG00000069188	SDK2	12	2	3	2	6	1	9	2	4	0	0	1	1	6	3	1	2	5	0	5	7	5	5	4	8	3	1	2	3	5
ENSG00000069206	ADAM7	653	481	549	489	289	351	440	339	507	384	432	487	481	380	284	595	483	271	343	159	967	993	330	472	224	969	662	222	597	182
ENSG00000069248	NUP133	3090	2429	2708	2832	2288	1781	2074	1966	3081	3181	2280	2272	2479	2267	2242	2410	2399	2784	2645	3062	4784	4656	3277	3280	3789	4035	3619	2562	3866	3867
ENSG00000069275	NUCKS1	14857	11400	12589	14106	10992	8034	10420	9827	15270	15178	10522	11060	12450	11106	10472	11934	11283	13914	13619	15885	24899	23918	17762	17358	20367	18070	16700	13097	18582	21188
ENSG00000069329	VPS35	4344	3445	3933	4266	3267	2546	2954	2795	4356	4757	3146	3147	3956	3340	3178	3698	3527	4267	4164	5018	7225	7181	5084	5150	5980	5758	5379	3720	5767	6570
ENSG00000069345	DNAJA2	5148	3739	3749	4479	3480	2799	3595	2925	4911	4914	3475	3635	3591	3677	3464	3411	3050	4192	3553	4243	6505	6509	4490	4788	5981	5705	4953	3991	5463	5424
ENSG00000069399	BCL3	333	237	272	292	224	156	245	193	327	348	252	240	235	208	207	174	207	269	215	253	411	374	301	267	423	358	294	294	351	317
ENSG00000069424	KCNAB2	1117	842	856	930	822	529	792	713	1195	1152	783	748	820	836	838	635	572	916	730	880	1215	1249	1111	971	1515	1134	983	1024	1125	1139
ENSG00000069431	ABCC9	1	0	0	0	0	0	0	1	2	1	0	0	1	0	0	0	0	0	1	0	3	0	0	1	0	1	0	0	0	1
ENSG00000069482	GAL	1169	794	802	891	692	567	793	627	916	983	684	722	708	822	716	767	704	1005	836	736	1400	1496	872	1034	1169	1367	1258	972	1293	950
ENSG00000069493	CLEC2D	61	54	70	79	68	36	61	60	92	102	45	50	45	51	48	31	40	45	40	50	74	81	84	46	77	53	46	48	51	82
ENSG00000069509	FUNDC1	0	0	0	1	1	0	0	1	0	0	1	1	0	0	0	0	1	1	0	0	0	0	0	0	0	3	0	0	0	0
ENSG00000069535	MAOB	2	2	2	1	1	2	6	1	5	1	3	2	3	2	5	10	4	8	1	2	6	0	1	5	2	9	4	3	10	2
ENSG00000069667	RORA	41	40	67	27	57	26	43	54	67	62	23	27	63	25	53	33	33	54	46	69	54	48	77	46	127	42	44	58	41	87
ENSG00000069696	DRD4	8	7	12	11	5	3	9	7	16	9	15	12	18	18	16	12	8	10	17	12	22	26	9	11	9	19	12	2	18	8
ENSG00000069702	TGFBR3	990	769	993	892	927	545	708	775	1007	1339	712	708	827	796	929	597	598	900	717	891	1156	1238	1211	912	1382	1040	977	956	1094	1193
ENSG00000069764	PLA2G10	1	0	0	0	0	0	1	0	0	0	0	0	0	0	0	0	0	0	0	0	0	0	0	0	0	0	0	0	0	0
ENSG00000069812	HES2	129	86	91	107	66	73	94	95	126	85	87	81	69	92	86	79	85	116	67	69	172	158	122	95	164	141	133	117	107	122
ENSG00000069849	ATP1B3	7060	5291	5700	6516	4917	3893	4986	4313	6830	6530	4703	5103	5312	4915	4568	5207	5029	6261	5731	6137	10565	10382	6895	7232	8064	8500	7787	5751	8329	8114
ENSG00000069869	NEDD4	458	309	417	432	358	253	299	318	471	465	291	256	446	282	362	294	296	383	346	610	574	600	525	437	736	530	439	429	552	783
ENSG00000069943	PIGB	436	306	400	461	357	244	272	263	465	429	309	307	338	311	301	320	300	394	362	518	650	606	463	488	547	498	434	324	488	730
ENSG00000069956	MAPK6	4599	3560	4780	4253	3595	2807	3069	3305	4447	5129	3231	3249	4382	3054	3342	4370	4118	4673	4465	6448	8229	8572	6386	5665	7810	6944	5813	4217	6284	8428
ENSG00000069966	GNB5	584	407	448	542	382	294	417	352	585	543	376	383	380	401	428	357	320	499	387	544	637	758	550	435	720	555	588	518	586	609
ENSG00000069974	RAB27A	482	393	412	455	362	261	394	317	521	459	368	372	392	362	334	404	376	445	448	418	860	837	499	603	590	744	647	390	671	627
ENSG00000069998	HDHD5	2403	1770	1850	2045	1575	1168	1749	1491	2199	2185	1575	1559	1610	1801	1609	1598	1486	2456	1727	1793	2995	3092	2495	2330	3162	2892	2595	2396	2858	2403
ENSG00000070010	UFD1	2834	2066	1971	2225	1723	1422	2009	1666	2469	2394	1767	1863	1806	1876	1851	1742	1566	2522	1905	2014	3262	3290	2360	2350	3233	3133	2831	2269	2918	2562
ENSG00000070018	LRP6	3059	2239	2540	2672	2278	1517	2069	1935	3247	3302	2072	2005	2263	2167	2261	1966	1601	2165	2046	2807	3456	3442	3211	2650	4230	2930	2871	2393	2931	3863
ENSG00000070019	GUCY2C	3	1	1	1	0	2	0	0	0	0	0	0	1	0	2	0	1	1	0	1	0	0	1	0	0	0	0	0	1	1
ENSG00000070031	SCT	1	0	0	0	0	1	1	0	0	1	0	2	0	1	0	1	2	0	1	1	0	0	0	0	1	0	0	0	0	1
ENSG00000070047	PHRF1	1814	1562	997	1260	813	798	1355	1199	3484	1511	2634	2586	2821	2958	1618	1515	1520	1630	1657	719	4319	3744	2938	2938	2291	3098	2245	1708	2459	1525
ENSG00000070061	ELP1	1548	1130	1215	1425	1062	863	1030	927	1489	1488	1107	1050	1018	1036	1012	1198	1162	1415	1314	1322	2320	2252	1645	1726	2200	1970	1821	1481	1971	2000
ENSG00000070081	NUCB2	1287	1025	1361	1363	1237	794	897	1024	1463	1679	966	1012	1248	957	1208	968	894	2096	1199	2956	1868	1985	2583	1477	4311	1483	1442	1946	1644	4458
ENSG00000070087	PFN2	2953	2307	2549	2862	2246	1737	2051	1768	3037	3075	2004	2080	2425	2156	2029	2128	2042	3118	2570	3383	4553	4305	3545	3468	4195	3412	2987	2515	3315	4480
ENSG00000070159	PTPN3	2490	1873	2157	2237	1923	1323	1760	1766	2602	2586	1688	1640	1913	1774	1841	1717	1473	1930	1709	2183	3057	2929	2431	2168	3146	2701	2447	2052	2534	2557
ENSG00000070182	SPTB	38	16	7	25	12	15	12	16	21	14	26	34	20	25	12	18	24	14	8	9	45	30	37	19	50	29	19	25	11	28
ENSG00000070190	DAPP1	5	0	0	0	0	0	1	0	1	1	0	0	0	1	1	2	0	0	0	0	0	0	3	0	1	0	1	0	0	1
ENSG00000070193	FGF10	2	0	0	0	0	0	0	0	0	0	0	0	0	0	0	0	0	0	0	0	0	0	0	0	0	0	0	0	0	0
ENSG00000070214	SLC44A1	2929	2356	2605	2951	2494	1753	2005	1954	2952	3571	2035	2107	2253	2197	2248	1976	1878	2617	2404	4056	3920	3938	3390	3136	5079	3062	2901	2564	3427	5504
ENSG00000070269	TMEM260	584	449	619	571	487	375	432	404	610	614	412	413	470	381	394	409	435	557	472	792	828	895	824	701	1081	694	648	654	706	1083
ENSG00000070366	SMG6	1921	1338	1226	1587	1245	959	1318	1198	2130	1799	1618	1495	1447	1592	1422	1111	937	1363	1159	1231	2036	2162	1829	1703	2483	1917	1734	1525	1873	1801
ENSG00000070367	EXOC5	2402	1842	2256	2417	2061	1427	1787	1575	2620	2570	1783	1770	2153	1732	1688	1929	1989	2176	2300	2829	4030	3972	2997	3059	3055	2922	2761	1977	2993	4028
ENSG00000070371	CLTCL1	233	186	191	198	173	114	170	136	257	219	169	157	169	173	174	149	158	178	161	213	276	290	260	223	320	252	217	190	268	237
ENSG00000070388	FGF22	2	3	2	4	0	0	0	2	3	0	3	1	2	2	2	0	0	1	2	0	7	2	5	4	1	3	5	3	1	1
ENSG00000070404	FSTL3	180	138	168	160	145	72	112	142	184	175	149	156	149	140	124	118	106	192	111	168	218	201	217	182	362	211	172	210	210	236
ENSG00000070413	DGCR2	4119	3064	2753	3509	2728	2007	2798	2282	4209	3590	3116	2909	2891	3144	2907	2447	2309	3251	2647	2746	4576	4477	3754	3411	5164	4367	3814	3511	4119	3779
ENSG00000070423	RNF126	2365	1779	1641	1980	1541	1224	1855	1273	2230	2055	1604	1616	1481	1710	1642	1722	1542	2127	1738	1706	3073	3203	2145	2253	2676	3247	2711	2192	2897	1965
ENSG00000070444	MNT	1220	873	1000	1051	842	561	878	831	1354	1234	1003	956	1117	1051	971	860	831	975	877	1091	1660	1467	1292	1225	1923	1406	1133	1206	1272	1369
ENSG00000070476	ZXDC	1891	1372	1519	1633	1441	901	1205	1196	2074	1913	1385	1327	1333	1369	1486	1133	979	1451	1141	1651	2155	2050	1880	1590	2692	1950	1750	1650	1806	2074
ENSG00000070495	JMJD6	1162	864	759	930	654	565	749	604	1087	909	857	762	714	828	635	821	733	936	752	713	1452	1443	913	987	1137	1449	1241	936	1302	985
ENSG00000070501	POLB	802	558	645	640	535	389	490	520	716	754	440	519	552	510	547	567	493	610	596	747	1061	1044	714	735	895	931	749	650	868	927
ENSG00000070526	ST6GALNAC1	2138	1529	1476	1688	1088	1081	1493	1121	1781	1479	1463	1577	1371	1465	1180	1824	1444	1304	1199	598	2834	2904	1304	1570	844	3214	2159	1274	1879	684
ENSG00000070540	WIPI1	203	136	169	183	121	93	123	128	174	169	137	134	149	140	141	119	93	121	109	149	218	220	150	152	252	206	139	165	134	197
ENSG00000070601	FRMPD1	323	269	239	349	224	210	235	190	354	340	255	223	242	248	194	200	165	254	238	395	374	293	322	287	612	363	319	262	320	458
ENSG00000070610	GBA2	3330	2492	2446	2846	2194	1728	2376	2210	3258	3255	2262	2283	2243	2439	2269	2043	1818	2919	2122	2642	3636	3700	3058	2711	4410	3486	3063	2956	3587	3419
ENSG00000070614	NDST1	7654	5866	5204	6582	5170	3910	5419	4163	7604	7477	5551	5433	4901	5947	5429	4935	4337	5290	5060	5515	8866	8773	6719	6370	8868	8366	7057	5743	7618	6851
ENSG00000070669	ASNS	3192	2384	4964	3096	4202	1928	2237	3758	3229	5873	2181	2205	4666	2333	4307	3008	3119	9073	3767	13134	5883	6160	10119	4916	17559	4912	4866	8207	5625	17200
ENSG00000070718	AP3M2	1419	1026	1108	1267	969	784	910	862	1519	1349	997	937	1009	947	908	1061	873	1194	1070	1339	1868	1897	1517	1351	1844	1735	1606	1318	1681	1665
ENSG00000070729	CNGB1	1	0	0	0	0	0	0	0	0	2	2	0	0	0	0	0	0	0	1	0	0	0	1	0	1	0	0	0	0	0
ENSG00000070731	ST6GALNAC2	40	24	37	33	20	14	28	22	37	26	11	19	25	26	31	12	23	26	20	17	26	29	27	13	47	27	22	26	23	33
ENSG00000070748	CHAT	3	0	0	0	0	0	0	0	0	0	0	0	0	0	0	0	0	0	0	0	0	0	0	0	0	0	0	0	0	0
ENSG00000070756	PABPC1	69871	51439	58476	59684	49107	35353	47920	45888	66482	72839	47905	47805	54782	50209	51507	51954	46313	65603	54336	68870	94212	94189	79343	68805	100104	82927	75105	67763	79755	83817
ENSG00000070759	TESK2	369	338	319	346	262	191	277	251	404	413	275	239	288	259	284	196	209	351	263	335	348	404	343	262	522	346	300	350	358	430
ENSG00000070761	CFAP20	1274	895	953	1015	748	626	827	638	1134	1174	877	858	836	902	898	964	848	1205	1023	962	1778	1807	1116	1162	1481	1685	1474	1171	1454	1224
ENSG00000070770	CSNK2A2	2815	2189	2276	2599	2087	1436	1954	1770	2884	2857	1978	1985	2104	2097	2046	2048	1722	2188	2136	2601	3721	3679	2961	2711	3684	3169	2801	2320	2990	3210
ENSG00000070778	PTPN21	954	715	839	794	758	527	631	726	979	938	633	680	689	655	716	644	603	643	620	656	1195	1152	701	777	998	1169	915	625	939	836
ENSG00000070785	EIF2B3	1228	876	935	1018	745	655	790	729	1129	1013	882	941	833	807	728	900	779	1071	989	880	1576	1717	1118	1212	1425	1440	1354	929	1430	1246
ENSG00000070808	CAMK2A	6	0	0	0	0	0	1	0	2	0	0	0	0	3	0	0	0	2	0	1	0	0	1	0	0	0	1	0	1	0
ENSG00000070814	TCOF1	3377	2582	1774	2516	1517	1444	2236	1844	4508	2530	3447	3420	2972	3601	2462	3040	2868	2659	3220	1222	7059	6415	4063	4941	3263	5996	4583	2843	4507	2399
ENSG00000070831	CDC42	5480	4037	4225	4983	3583	2973	3768	3149	5260	5381	3607	3711	4184	3731	3566	3801	3536	4998	4205	5163	7189	7466	5363	5396	6844	5875	5424	4264	5945	6623
ENSG00000070882	OSBPL3	666	481	481	585	479	349	462	381	645	627	473	440	413	439	396	423	367	408	474	449	887	792	588	653	632	747	652	472	672	627
ENSG00000070886	EPHA8	7	2	1	1	1	0	3	2	2	1	2	0	2	0	3	0	7	2	1	2	4	0	1	0	1	0	2	3	0	4
ENSG00000070915	SLC12A3	5	2	5	0	2	1	6	5	6	17	2	0	4	4	3	2	0	1	0	0	9	4	2	3	8	2	2	7	1	11
ENSG00000070950	RAD18	1104	884	914	1084	825	685	862	696	1336	1159	869	837	897	848	719	1063	1031	977	1091	1028	2099	2084	1347	1412	1234	1605	1367	893	1491	1412
ENSG00000070961	ATP2B1	5265	4189	5593	5230	5223	3253	3713	4099	5988	7491	3779	3933	5109	4065	4673	3238	3003	4818	3755	8361	6248	6608	7298	4826	10701	5114	5010	5304	5413	10985
ENSG00000070985	TRPM5	16	0	3	5	6	0	3	3	8	5	8	5	3	9	10	6	3	2	3	5	7	6	12	5	13	6	3	3	7	12
ENSG00000071051	NCK2	703	496	562	589	493	322	483	471	631	692	459	474	532	462	517	412	328	561	413	596	756	763	710	574	1016	688	600	584	688	793
ENSG00000071054	MAP4K4	3990	3203	2850	3274	2559	2002	2779	2714	4933	3936	3477	3367	3689	3667	3119	2615	2420	3088	2980	2666	5629	5307	4376	3884	5360	4623	4128	3363	4391	4145
ENSG00000071073	MGAT4A	193	156	231	213	147	151	138	140	235	249	175	133	198	157	154	110	95	177	136	254	207	203	200	157	342	149	169	185	182	322
ENSG00000071082	RPL31	20188	14558	16645	16561	13586	10847	13681	13053	17541	17461	12304	13948	15441	13937	13318	12690	12220	22083	14810	18264	22733	24865	17096	17168	27035	22508	20826	18327	22825	23575
ENSG00000071127	WDR1	9603	6651	6552	7915	5630	4769	6526	5380	8949	8618	6706	6630	6479	7094	6563	5915	4931	7583	5850	5889	10451	10635	8162	7652	9896	10090	8641	7637	9182	7737
ENSG00000071189	SNX13	1478	1203	1399	1623	1211	948	1126	1020	1684	1695	1182	1169	1315	1118	1085	1120	1137	1353	1278	1954	2336	2511	1989	1791	2203	1814	1683	1316	1791	2500
ENSG00000071203	MS4A12	0	0	0	0	0	0	0	0	0	0	0	0	0	0	0	0	0	0	0	0	0	0	0	0	0	0	0	0	0	0
ENSG00000071205	ARHGAP10	1949	1375	1458	1716	1390	1041	1334	1206	1878	1905	1323	1359	1382	1326	1277	1209	1128	1492	1297	1510	2327	2342	1667	1728	2059	1897	1781	1458	1892	1728
ENSG00000071242	RPS6KA2	1922	1324	1803	1591	1651	926	1289	1500	1845	2291	1254	1285	1746	1300	1680	1100	1006	1957	1187	2208	2225	2275	2546	1704	3852	1992	1704	2190	1931	3156
ENSG00000071243	ING3	607	462	549	543	469	355	428	423	618	632	415	419	474	461	409	444	456	550	548	601	904	878	599	675	764	711	638	457	761	796
ENSG00000071246	VASH1	118	108	87	137	89	67	113	91	184	116	114	113	133	142	132	69	75	113	87	86	142	133	193	111	253	128	121	129	138	167
ENSG00000071282	LMCD1	1	3	7	2	2	1	1	4	5	7	3	0	2	1	3	0	1	2	4	2	2	9	5	2	4	1	5	4	3	4
ENSG00000071462	BUD23	2047	1408	1461	1640	1245	978	1373	1147	1749	1742	1276	1366	1361	1452	1357	1252	1110	1823	1370	1404	2351	2492	1556	1760	2195	2332	1992	1811	2152	1778
ENSG00000071537	SEL1L	3841	2990	3840	3680	3089	2111	2796	2870	3961	4320	2732	2726	3580	2778	2967	2997	2711	4027	3034	5257	5939	5628	5435	3980	6955	4709	4397	4061	4413	6885
ENSG00000071539	TRIP13	2102	1655	1442	1907	1397	1081	1564	1210	2117	1992	1438	1425	1385	1626	1374	1842	1578	1763	1938	1546	3368	3422	1980	2415	2194	3010	2668	1696	2805	1984
ENSG00000071553	ATP6AP1	2785	1998	2020	2295	1860	1389	1860	1616	2465	2711	1738	1790	1808	1914	1901	1356	1319	2338	1617	2309	2608	2735	2504	2046	3533	2597	2310	2259	2521	2692
ENSG00000071564	TCF3	3670	2626	2422	2910	2173	1752	2509	1969	3627	3229	2645	2405	2292	2639	2476	2190	1969	2737	2325	2340	4149	4074	3118	3145	4043	3822	3334	2763	3742	2996
ENSG00000071575	TRIB2	9	7	0	3	5	7	7	1	3	7	4	7	2	8	1	9	5	15	4	12	5	16	3	8	4	10	8	4	8	7
ENSG00000071626	DAZAP1	6504	5009	4609	5809	4421	3339	4658	3684	6803	6240	5007	4716	4657	5158	4983	4472	4128	5239	4796	5343	8347	8209	6095	6618	8406	7835	6817	5602	7687	6300
ENSG00000071655	MBD3	2510	1924	1658	1772	1321	1133	1682	1570	3663	2244	2638	2502	2651	2698	2044	1682	1669	2316	1886	1219	4344	3884	3308	3005	3371	3369	2643	2370	2879	2356
ENSG00000071677	PRLH	1	0	0	0	2	0	0	0	0	0	0	0	0	1	0	0	0	0	0	0	0	2	0	0	0	0	0	0	0	1
ENSG00000071794	HLTF	6301	4731	5788	5994	4889	3679	4281	3986	6619	6585	4549	4376	5511	4444	4546	4821	4908	5010	5766	6855	9360	9771	7171	7264	7990	7538	7054	4937	7845	9008
ENSG00000071859	FAM50A	1443	1029	955	1173	815	691	941	911	1397	1407	1050	1019	1087	1179	986	975	831	1387	998	1052	1680	1701	1380	1287	1979	1699	1467	1329	1645	1465
ENSG00000071889	FAM3A	697	473	495	599	473	382	493	386	735	723	477	436	489	471	515	403	378	672	468	590	780	803	697	602	1008	778	711	681	712	809
ENSG00000071894	CPSF1	1627	1260	1147	1389	1073	862	1188	993	1801	1592	1314	1264	1326	1241	1239	1237	987	1486	1209	1058	2098	2093	1735	1659	2047	2127	1816	1421	1903	1557
ENSG00000071909	MYO3B	6	3	1	4	4	3	2	4	1	4	2	3	5	2	1	3	2	1	1	1	4	2	3	3	3	7	2	6	1	6
ENSG00000071967	CYBRD1	3	2	0	0	1	0	1	1	0	0	0	1	1	0	2	3	0	0	0	1	2	1	0	1	6	1	1	0	1	0
ENSG00000071991	CDH19	1	0	1	0	0	0	0	1	1	1	0	0	1	0	1	1	0	0	2	1	2	3	1	0	0	0	0	0	0	2
ENSG00000071994	PDCD2	2091	1486	1609	1783	1440	1142	1320	1259	1915	1988	1400	1375	1510	1391	1428	1379	1392	1799	1582	1825	2786	2704	2012	2088	2433	2236	2032	1828	2276	2535
ENSG00000072041	SLC6A15	2	0	0	0	0	0	0	0	0	0	0	0	0	0	0	0	0	0	0	0	0	0	0	0	0	0	0	0	0	0
ENSG00000072042	RDH11	8828	6546	7451	7993	6257	4671	6107	5646	8395	8547	5858	5798	6817	5994	6091	5144	4478	7006	5434	8288	9492	9567	7948	6899	11075	8170	7410	6791	8136	10490
ENSG00000072062	PRKACA	4177	3017	2810	3523	2896	2008	2876	2352	3828	4082	2829	2846	2777	3042	3101	2643	2282	3010	2716	3411	4607	4516	3519	3346	5304	4112	3629	3265	4205	3989
ENSG00000072071	ADGRL1	9000	6841	6032	7239	6038	4316	6336	5066	9089	8892	6560	6302	6184	6957	6621	5606	5056	6806	5971	6245	10487	10044	9083	8104	10999	9710	8633	7604	9177	7944
ENSG00000072080	SPP2	0	0	0	0	0	0	0	0	0	0	0	0	0	0	0	0	0	0	0	0	0	0	0	0	0	0	0	0	0	0
ENSG00000072110	ACTN1	4927	3569	3148	3920	2992	2263	3252	2746	4607	4362	3385	3412	3177	3508	3416	3210	2774	3711	3314	3427	5707	5561	4254	4239	5835	5421	4699	4107	5153	4414
ENSG00000072121	ZFYVE26	2124	1631	1738	1937	1523	1103	1414	1422	2071	2087	1504	1428	1526	1531	1499	1326	1123	1592	1372	1725	2397	2362	2042	1788	2712	2078	1977	1773	2103	2208
ENSG00000072133	RPS6KA6	721	525	652	685	589	447	473	503	708	747	523	487	618	556	478	463	444	602	553	812	942	1062	918	684	1038	763	727	628	712	1124
ENSG00000072134	EPN2	2825	2071	2042	2470	1627	1394	1987	1651	2780	2354	2051	1975	1833	1936	1673	1966	1713	1946	1921	1903	3680	3540	2596	2580	2877	3296	2865	2238	2875	2364
ENSG00000072135	PTPN18	2902	2296	2124	2459	1874	1464	2148	1792	2919	2638	2041	2037	1980	2102	1997	1801	1674	2430	1844	1928	3208	3364	2649	2337	3163	3169	2899	2531	2861	2404
ENSG00000072163	LIMS2	9	1	1	6	2	1	2	4	3	2	3	2	2	2	5	2	1	6	1	2	2	2	3	4	7	3	6	11	2	7
ENSG00000072182	ASIC4	1	0	0	1	1	0	0	1	3	2	3	1	1	0	2	1	0	3	0	0	0	1	0	0	0	0	1	0	1	4
ENSG00000072195	SPEG	12	4	4	4	0	6	2	3	3	3	5	4	4	4	4	3	2	8	2	6	8	7	7	2	4	3	2	5	3	4
ENSG00000072201	LNX1	20	10	5	8	15	5	8	8	16	8	9	12	17	5	13	11	11	13	15	6	23	13	12	10	22	13	13	19	21	11
ENSG00000072210	ALDH3A2	4316	3002	3619	3764	3081	2307	2903	2919	3982	4565	2719	2928	3474	2966	3143	2456	2291	4716	2783	5000	4888	4861	4848	3590	7823	4049	3886	4352	4290	7127
ENSG00000072274	TFRC	25104	19263	20953	23222	17822	14182	17221	15407	25392	24870	18141	18208	20008	18505	17130	22260	20425	21355	23267	22759	43047	43084	27967	28597	29587	34846	31492	20847	34175	30076
ENSG00000072310	SREBF1	8148	6162	7329	6767	6164	3939	5952	6030	8288	9210	5583	5729	6802	5965	6935	6538	5932	8749	6917	9720	11378	11808	11305	9249	16009	11547	10027	10212	11697	11218
ENSG00000072315	TRPC5	1	0	0	0	1	0	0	0	0	0	0	0	0	0	0	0	0	0	0	0	0	0	0	0	0	0	0	0	0	0
ENSG00000072364	AFF4	9976	7439	8614	8820	7461	5299	6732	6574	9877	10673	6842	6608	7595	6789	6945	6395	5601	7450	6674	10753	11906	11918	10598	8655	13957	9709	8973	7978	8967	13357
ENSG00000072401	UBE2D1	297	206	258	308	205	196	233	175	325	280	192	205	238	213	166	230	214	273	247	292	509	496	307	360	319	380	367	216	367	396
ENSG00000072415	MPP5	3184	2477	2797	2860	2344	1787	2267	1887	3154	3130	2126	2181	2582	2309	2269	2197	1933	2535	2369	2950	4164	4190	3428	2938	4082	3268	2951	2419	3146	3983
ENSG00000072422	RHOBTB1	15	6	8	14	7	9	7	10	6	17	7	10	13	12	7	4	4	10	5	2	20	13	13	8	7	10	8	13	9	14
ENSG00000072501	SMC1A	2334	1716	1390	1613	1184	1030	1627	1534	3650	2036	2840	2667	3066	3007	2026	1893	1780	2022	2052	997	4726	4282	3538	3221	2919	3903	3047	2291	3082	2309
ENSG00000072506	HSD17B10	2837	2076	1954	2303	1891	1357	1960	1635	2366	2422	1779	1777	1783	1999	1910	1687	1612	2566	1870	1987	3019	3336	2083	2412	3388	3099	2694	2347	3079	2542
ENSG00000072518	MARK2	3796	2726	2741	3236	2723	1813	2707	2280	3780	3784	2407	2566	2554	2560	2685	2446	2176	2705	2483	3019	4501	4450	3356	3256	4700	4029	3593	3105	3985	3626
ENSG00000072571	HMMR	2066	1503	1880	1958	1543	1254	1509	1256	2163	2116	1439	1431	1739	1479	1397	2048	2127	1738	2601	2528	4525	4493	2231	3231	2702	3295	2967	1689	3204	3498
ENSG00000072609	CHFR	977	708	731	817	673	468	707	611	976	868	700	692	702	750	689	577	542	799	584	746	1162	1109	899	798	1207	1036	911	865	945	982
ENSG00000072657	TRHDE	2	0	0	1	1	0	1	0	1	0	0	0	1	1	1	0	0	0	0	0	0	0	1	0	0	0	0	0	1	0
ENSG00000072682	P4HA2	692	484	414	570	455	334	420	373	652	607	413	379	376	462	405	396	342	555	430	523	675	760	609	511	914	692	598	550	643	709
ENSG00000072694	FCGR2B	1	0	0	1	0	0	0	0	0	0	0	0	0	0	0	0	0	0	0	0	0	1	0	0	1	3	0	0	0	0
ENSG00000072736	NFATC3	1947	1374	1534	1677	1312	958	1347	1159	1780	1813	1254	1276	1263	1355	1339	1323	1099	1605	1352	1623	2384	2413	1728	1752	2309	2021	1825	1546	2001	2058
ENSG00000072756	TRNT1	1569	1161	1325	1495	1077	933	1156	1043	1567	1430	1137	1125	1142	1114	954	1094	1057	1297	1202	1455	2166	2258	1657	1559	1802	1801	1506	1370	1582	1848
ENSG00000072778	ACADVL	8777	6378	6331	7299	5824	4358	6075	5719	8364	7873	6090	5858	6290	6294	6202	4818	4265	6976	5119	6026	8770	9023	7400	6518	11486	8695	7786	7601	8518	8493
ENSG00000072786	STK10	554	418	324	464	282	244	421	335	543	440	412	412	348	475	381	296	309	376	335	309	621	610	466	435	611	512	480	410	538	426
ENSG00000072803	FBXW11	4465	3181	3531	3733	2888	2297	2966	2655	4081	4077	2893	2856	3175	3019	2760	2895	2594	3350	3065	3464	5331	5291	4081	3908	5067	4679	4034	3297	4463	4596
ENSG00000072818	ACAP1	14	7	8	10	6	5	5	12	4	14	4	5	10	2	11	10	4	11	2	5	23	16	3	7	15	6	11	10	9	8
ENSG00000072832	CRMP1	6	2	3	6	1	0	3	2	7	4	1	3	0	6	3	0	1	3	4	5	4	8	6	0	1	4	3	2	1	1
ENSG00000072840	EVC	1603	1282	1116	1326	1042	797	1149	1095	1973	1666	1290	1210	1184	1410	1166	961	871	1223	1033	1109	1904	1807	1889	1418	2180	1724	1409	1405	1565	1732
ENSG00000072849	DERL2	1235	888	1037	1154	921	711	778	735	1257	1160	846	866	937	849	804	880	833	1289	1020	1360	1904	1848	1329	1310	1804	1356	1310	1153	1460	1827
ENSG00000072858	SIDT1	57	42	49	49	43	25	38	39	56	74	39	49	51	43	55	34	29	51	52	86	64	79	70	58	101	64	68	45	65	90
ENSG00000072864	NDE1	1083	885	851	1036	903	578	801	709	1083	1214	805	791	796	855	826	876	770	888	924	1053	1518	1577	1198	1165	1729	1424	1267	956	1302	1183
ENSG00000072952	MRVI1	7	0	0	0	1	2	2	3	1	2	1	0	0	2	0	0	2	0	0	2	3	2	1	0	0	0	1	1	5	0
ENSG00000072954	TMEM38A	311	177	192	233	186	137	192	125	287	260	210	198	164	206	206	128	100	209	161	235	265	271	250	183	380	249	181	246	229	225
ENSG00000072958	AP1M1	1515	1044	1037	1287	969	744	1076	848	1408	1483	995	1031	917	1089	1079	1047	950	1372	1170	1224	1936	1947	1560	1452	1984	1968	1830	1434	1867	1570
ENSG00000073008	PVR	1592	1240	1228	1309	1030	747	1118	1018	1663	1573	1140	1093	1101	1218	1045	1113	993	1483	1205	1167	2199	2248	1629	1491	1967	2139	1770	1541	1951	1422
ENSG00000073050	XRCC1	526	362	366	439	383	239	364	347	542	531	362	366	397	391	401	359	298	442	384	392	625	682	486	494	707	674	610	448	595	475
ENSG00000073060	SCARB1	4803	3527	3242	4077	3034	2319	3315	2613	4476	4130	3271	3326	3094	3493	3229	3621	3052	3823	3504	3517	6299	6222	4363	4499	5607	6087	5285	3978	5544	4173
ENSG00000073067	CYP2W1	4	4	4	6	4	4	1	6	10	2	4	5	4	1	4	2	4	0	3	4	7	7	3	9	14	18	2	5	4	10
ENSG00000073111	MCM2	7568	5441	4517	5652	4073	3577	4954	3641	7229	6147	5529	5462	4701	5668	4929	7020	6319	6875	7324	4185	13249	13254	7589	9933	7817	12543	10906	6987	11724	6271
ENSG00000073146	MOV10L1	6	5	23	12	8	3	3	15	8	13	6	3	18	7	6	5	6	22	5	42	9	5	20	14	69	5	9	16	10	50
ENSG00000073150	PANX2	519	354	329	399	318	243	346	271	471	484	335	372	323	361	362	205	160	350	197	287	368	345	426	296	645	335	331	373	363	479
ENSG00000073169	SELENOO	1093	827	667	877	670	493	765	608	1160	865	780	758	655	774	729	620	551	873	653	692	1151	1159	844	859	1127	1086	939	880	1213	878
ENSG00000073282	TP63	1	0	0	0	1	0	1	0	0	0	0	0	1	0	0	0	0	0	0	0	1	1	0	0	0	0	0	0	0	0
ENSG00000073331	ALPK1	184	131	216	149	193	95	133	168	214	235	103	133	180	138	177	102	95	193	132	285	197	195	245	171	375	186	169	189	168	339
ENSG00000073350	LLGL2	1731	1282	1169	1444	1059	892	1118	1092	2001	1619	1355	1234	1291	1386	1245	872	907	1533	1049	1338	1768	1860	1841	1468	2631	1669	1558	1542	1792	1957
ENSG00000073417	PDE8A	933	696	724	792	601	516	639	693	976	893	668	651	686	662	635	595	510	676	635	741	1155	1167	914	804	1027	1001	895	748	947	981
ENSG00000073464	CLCN4	314	209	240	221	240	115	194	196	254	273	199	180	238	189	215	170	171	245	178	289	331	339	295	241	387	275	231	241	275	363
ENSG00000073536	NLE1	2064	1586	1445	1768	1363	954	1479	1186	1955	1909	1442	1390	1377	1530	1368	1464	1412	1983	1581	1579	2823	2727	2115	2095	2701	2587	2433	2000	2505	2100
ENSG00000073578	SDHA	4842	3553	3320	4091	3179	2350	3291	2927	4702	4308	3442	3521	3448	3673	3476	3375	3091	4094	3587	3312	6301	6305	4569	4506	5946	5837	5172	4268	5702	4558
ENSG00000073584	SMARCE1	2388	1857	1873	2334	1847	1286	1643	1508	2478	2503	1764	1683	1869	1744	1681	1567	1397	2097	1751	2567	3255	3087	2548	2312	3263	2493	2191	1785	2410	3633
ENSG00000073598	FNDC8	1	0	0	3	5	0	1	1	0	0	3	0	0	1	1	0	1	2	1	3	0	0	1	0	2	5	0	1	2	2
ENSG00000073605	GSDMB	281	186	179	259	234	158	188	181	336	246	194	225	227	248	206	148	124	175	159	183	286	281	324	239	391	254	229	242	210	264
ENSG00000073614	KDM5A	2515	1941	2122	2318	1938	1350	1813	1897	2782	2712	1865	1844	2101	1981	1840	1742	1457	2117	1724	2442	3051	3188	2691	2141	3790	2747	2397	2248	2559	3211
ENSG00000073670	ADAM11	268	205	177	224	185	142	178	167	251	284	169	189	185	217	184	139	138	253	152	246	254	267	246	218	367	248	225	213	243	268
ENSG00000073711	PPP2R3A	631	474	492	628	482	399	440	421	652	631	445	438	490	464	443	345	342	446	393	583	663	721	623	508	833	545	556	475	548	804
ENSG00000073712	FERMT2	467	361	446	401	300	272	343	309	475	497	301	310	402	297	389	240	199	455	309	533	558	530	530	400	764	438	405	398	434	648
ENSG00000073734	ABCB11	35	29	25	35	26	24	20	25	41	48	32	28	26	25	24	29	20	39	36	40	57	54	56	43	59	73	54	40	63	44
ENSG00000073737	DHRS9	1	0	0	0	1	0	1	0	1	2	0	1	1	1	0	1	0	1	0	1	0	0	1	0	0	1	0	0	0	0
ENSG00000073754	CD5L	2	0	0	0	0	0	0	0	0	0	0	0	0	0	0	0	2	0	0	0	0	0	0	0	0	0	0	0	0	0
ENSG00000073756	PTGS2	2	0	0	0	0	0	0	0	0	0	0	0	0	0	0	0	0	0	0	0	0	0	0	0	0	0	2	0	0	0
ENSG00000073792	IGF2BP2	17	3	8	11	8	5	10	8	10	13	5	7	8	8	11	5	1	8	3	16	9	10	5	6	8	8	4	3	4	5
ENSG00000073803	MAP3K13	2245	1671	1849	2114	1788	1200	1635	1510	2315	2588	1618	1518	1871	1667	1641	1373	1289	2060	1612	2478	2735	2831	2351	2024	3121	2241	2169	1885	2223	3260
ENSG00000073849	ST6GAL1	143	91	105	110	108	71	100	82	120	138	76	98	82	93	91	85	65	147	100	146	159	171	162	125	216	145	125	105	135	170
ENSG00000073861	TBX21	1	0	1	0	0	0	0	0	1	0	0	0	0	1	1	0	0	0	0	0	1	0	0	0	0	0	0	0	0	0
ENSG00000073905	VDAC1P1	18	17	23	19	13	10	18	13	25	20	12	16	13	10	21	13	22	19	7	20	24	28	15	9	28	37	19	20	28	17
ENSG00000073910	FRY	1497	1010	1378	1226	1051	765	1002	1008	1418	1466	955	906	1192	956	946	1083	781	1030	935	1256	1807	1737	1426	1228	1708	1713	1479	1071	1406	1415
ENSG00000073921	PICALM	3086	2480	2712	2940	2280	1845	2212	1956	3186	3121	2174	2273	2419	2206	2094	2290	2209	2864	2535	3430	4733	4531	3485	3313	4007	3481	3231	2439	3441	4489
ENSG00000073969	NSF	2743	2058	2172	2533	2046	1554	1931	1656	2674	2845	1910	1917	2084	1918	1888	1771	1661	2228	2014	2674	3607	3434	2593	2586	3562	2916	2621	2215	2796	3445
ENSG00000074047	GLI2	15	3	2	2	3	4	2	1	2	2	0	0	1	0	1	1	6	7	0	4	2	0	1	1	11	2	2	5	1	3
ENSG00000074054	CLASP1	3329	2512	2612	2982	2415	1642	2275	1988	3363	3460	2299	2248	2458	2364	2296	2135	1965	2506	2279	3073	4049	3881	3244	2991	4208	3408	3091	2724	3404	3705
ENSG00000074071	MRPS34	3878	2786	2303	3056	2426	1876	2641	2012	3252	3036	2326	2472	2171	2460	2426	2680	2459	3741	2841	2876	4727	5275	2995	3567	4422	4937	4403	3644	4758	3313
ENSG00000074181	NOTCH3	2266	1683	1575	1823	1462	1082	1451	1290	2488	2138	1745	1666	1614	1774	1744	1056	1022	1718	1250	1608	2143	1993	2391	1744	3337	1905	1744	2009	1933	2242
ENSG00000074201	CLNS1A	2915	2219	2415	2675	2091	1543	2113	1880	2940	2801	2121	2080	2326	2201	2047	2204	2136	2924	2406	2858	4321	4466	3034	3178	3918	3743	3455	2799	3682	3680
ENSG00000074211	PPP2R2C	670	516	566	590	485	345	511	426	691	695	462	454	520	508	521	386	310	620	401	595	658	679	703	485	886	561	557	652	595	770
ENSG00000074219	TEAD2	551	442	395	427	365	268	374	344	736	451	465	418	490	438	353	231	252	336	305	389	592	536	486	407	754	484	394	414	456	497
ENSG00000074266	EED	725	585	600	707	483	406	502	430	777	651	464	555	608	566	466	556	556	626	618	656	1197	1267	806	903	803	1015	775	566	870	972
ENSG00000074276	CDHR2	19	12	17	15	15	7	12	7	11	14	12	21	4	7	6	7	7	8	6	10	14	15	11	14	19	10	15	8	14	18
ENSG00000074317	SNCB	2	1	0	0	0	0	1	1	0	3	0	0	0	2	1	0	6	6	1	1	0	4	2	1	5	3	1	0	6	6
ENSG00000074319	TSG101	2196	1673	1919	1830	1597	1249	1533	1489	2132	2221	1489	1508	1714	1580	1579	1398	1411	2283	1718	2307	2770	2898	2244	2067	3145	2371	2220	1976	2451	2837
ENSG00000074356	NCBP3	1879	1390	1362	1611	1226	1031	1261	1071	1972	1688	1395	1379	1433	1339	1299	1335	1140	1460	1372	1504	2590	2348	1939	1893	2402	2206	1957	1496	2096	2147
ENSG00000074370	ATP2A3	7	0	0	2	1	1	4	3	10	1	5	3	3	5	1	2	1	6	0	3	1	2	5	1	1	4	3	7	4	3
ENSG00000074410	CA12	259	178	179	208	156	107	182	137	276	242	183	164	176	175	152	116	115	205	126	181	236	243	241	184	285	222	141	178	199	198
ENSG00000074416	MGLL	967	685	635	829	622	431	729	556	927	942	664	678	583	703	655	608	533	645	560	460	1057	1066	786	739	730	1002	808	655	846	561
ENSG00000074527	NTN4	8	4	12	11	17	8	4	8	12	12	9	2	7	14	8	5	7	11	5	21	9	18	18	10	17	11	5	12	16	14
ENSG00000074582	BCS1L	1450	1084	1097	1251	961	753	1125	844	1416	1365	1074	1028	1032	1076	1031	1159	992	1453	1149	1160	2033	2204	1478	1596	1975	1998	1847	1448	1971	1540
ENSG00000074590	NUAK1	302	215	238	251	234	173	187	181	262	303	214	190	228	193	208	125	107	212	150	294	270	269	311	209	445	235	228	251	221	381
ENSG00000074603	DPP8	1800	1431	1638	1797	1417	1063	1254	1089	1854	1917	1266	1322	1441	1295	1240	1269	1115	1505	1388	1946	2443	2400	1967	1789	2480	1926	1699	1374	1925	2511
ENSG00000074621	SLC24A1	428	306	351	393	338	229	317	323	548	502	380	318	431	363	375	327	272	385	313	383	537	528	519	362	672	456	367	396	394	497
ENSG00000074657	ZNF532	4020	2971	3330	3329	2604	2143	2841	2792	4121	3881	2853	2687	3212	2887	2585	2567	2173	3237	2365	3104	4188	4348	4133	3193	4806	4023	3609	3428	3636	3769
ENSG00000074660	SCARF1	32	22	34	28	27	16	20	27	45	39	29	19	32	39	19	30	15	39	24	38	46	39	38	31	89	33	19	34	23	49
ENSG00000074695	LMAN1	4921	3745	4186	4461	3414	2693	3456	3165	4791	4760	3434	3473	3942	3472	3360	3836	3645	4779	3963	5517	7459	7806	6233	5258	7116	6452	5705	5001	5861	7485
ENSG00000074696	HACD3	6025	4665	4729	5715	4230	3396	4151	3640	5961	6081	4274	4350	4465	4388	4132	4555	4341	5323	5221	5818	9289	9069	6231	6786	7431	7309	6694	4942	7546	7926
ENSG00000074706	IPCEF1	8	6	16	6	11	7	12	8	14	19	2	14	11	5	19	13	5	7	7	10	21	18	13	6	14	17	21	9	9	17
ENSG00000074755	ZZEF1	4385	3215	3300	3941	3127	2270	3089	2652	4511	4438	3166	3017	3111	3314	3148	2872	2608	3224	2982	3262	5239	5075	4141	3699	5518	4778	4091	3628	4409	4213
ENSG00000074771	NOX3	0	0	0	0	0	0	0	0	0	0	0	0	0	0	0	0	0	0	0	0	0	0	0	0	0	0	0	0	0	0
ENSG00000074800	ENO1	54205	39113	37776	44705	32714	26312	37761	29699	47282	48555	34853	36620	34345	38212	36021	37966	34301	51579	39311	39049	66595	70884	47105	50131	63122	65852	59118	48233	63969	49622
ENSG00000074803	SLC12A1	1	0	0	0	0	0	0	1	0	0	0	0	1	0	0	1	0	0	0	0	0	0	0	0	0	1	0	1	0	0
ENSG00000074842	MYDGF	2651	2014	1730	2056	1745	1265	1905	1603	2249	2175	1663	1723	1725	1709	1740	1799	1537	3065	1888	2354	3054	3403	2615	2309	4108	3353	2928	3011	3136	2920
ENSG00000074855	ANO8	325	254	232	189	188	145	231	238	482	294	321	288	351	341	268	141	175	216	163	188	392	319	383	271	411	371	290	268	326	311
ENSG00000074935	TUBE1	176	152	232	188	232	97	118	176	206	337	133	130	262	153	197	177	176	298	222	434	325	408	356	242	509	358	271	299	299	457
ENSG00000074964	ARHGEF10L	401	287	226	286	219	183	286	231	430	324	291	268	280	313	273	160	154	276	187	221	383	366	377	304	511	308	310	302	332	373
ENSG00000074966	TXK	37	38	43	32	25	24	21	32	34	42	31	31	31	19	26	10	16	24	15	41	20	29	34	19	30	25	22	30	21	52
ENSG00000075035	WSCD2	2	0	0	0	0	0	0	0	0	3	0	0	0	0	0	0	0	0	0	0	0	0	0	0	0	0	0	1	0	0
ENSG00000075043	KCNQ2	33	23	22	44	18	14	27	21	34	25	26	20	19	17	22	13	24	36	24	24	30	37	32	32	49	52	44	41	38	21
ENSG00000075073	TACR2	6	0	0	0	6	0	0	2	3	0	0	0	0	1	2	1	0	1	0	0	1	0	4	0	1	2	0	1	2	1
ENSG00000075089	ACTR6	421	325	466	465	380	311	282	293	488	444	359	308	462	324	275	392	418	552	545	781	985	947	638	765	728	565	531	363	588	1197
ENSG00000075131	TIPIN	719	627	550	726	506	459	561	416	806	733	574	566	550	667	473	686	645	759	781	616	1385	1353	767	998	880	1062	1017	655	1148	872
ENSG00000075142	SRI	1067	820	913	857	734	576	699	652	917	1019	663	747	816	746	690	776	696	971	778	1047	1385	1466	1011	1096	1417	1257	1099	915	1211	1272
ENSG00000075151	EIF4G3	3666	2640	3067	3162	2608	1937	2589	2353	3747	3773	2484	2423	2705	2610	2545	2335	1994	2709	2319	3448	4060	4135	3782	2874	5241	3796	3492	3181	3726	4453
ENSG00000075188	NUP37	637	491	609	664	515	399	495	451	663	723	477	481	541	464	497	569	568	657	653	706	1101	1135	725	834	879	952	880	557	923	880
ENSG00000075213	SEMA3A	1	0	0	0	0	0	0	0	0	0	0	0	0	0	0	0	0	0	0	0	0	0	0	0	0	0	0	0	0	0
ENSG00000075218	GTSE1	1907	1424	1188	1636	1183	952	1304	958	1741	1546	1262	1261	1055	1304	1209	1538	1389	1444	1727	1468	2871	2970	1726	2157	2122	2767	2442	1532	2627	1764
ENSG00000075223	SEMA3C	1297	1026	1103	1105	809	729	868	842	1218	1242	855	864	1019	829	758	943	879	962	1010	1078	1758	1903	1386	1291	1605	1525	1356	1169	1433	1501
ENSG00000075234	TTC38	1816	1353	1244	1576	1165	851	1283	1034	1628	1579	1168	1185	1228	1283	1143	1011	1010	1375	1055	1218	1925	1996	1441	1398	1912	1841	1663	1457	1719	1535
ENSG00000075239	ACAT1	3466	2648	3280	3202	2625	1908	2539	2378	3453	3635	2348	2535	2960	2489	2543	2549	2348	3553	2815	3979	4842	5114	3882	3472	5544	4175	3810	3296	4381	5033
ENSG00000075240	GRAMD4	685	521	500	495	463	320	427	438	708	670	485	498	535	542	568	353	344	570	408	519	642	666	767	490	987	588	541	569	633	720
ENSG00000075275	CELSR1	2386	1745	1675	1917	1536	1168	1527	1573	2824	2391	1990	1789	1955	2055	1855	1391	1311	1799	1539	1798	2827	2682	2766	2259	3688	2524	2249	2233	2496	2711
ENSG00000075290	WNT8B	27	19	18	26	25	20	23	12	30	25	18	24	22	16	23	23	19	24	22	21	45	49	43	24	28	41	48	28	32	27
ENSG00000075292	ZNF638	3989	2971	3367	3704	2767	2419	2790	2541	4280	4133	2839	2814	3161	2772	2565	2736	2566	2704	3037	3545	5351	5591	4415	3747	4800	4695	4205	2985	4203	4922
ENSG00000075303	SLC25A40	560	420	501	495	434	291	341	406	515	638	408	378	464	380	389	405	419	485	481	573	909	837	640	669	701	645	609	432	661	773
ENSG00000075336	TIMM21	1695	1278	1171	1503	1107	938	1233	916	1692	1515	1171	1214	1147	1317	1078	1434	1237	1531	1542	1323	2684	2870	1624	1885	1863	2510	2248	1359	2466	1746
ENSG00000075340	ADD2	3	0	1	3	4	1	5	6	5	6	4	0	2	4	4	2	0	7	1	9	0	6	6	3	12	2	6	11	3	8
ENSG00000075388	FGF4	0	0	0	0	0	1	0	0	0	0	0	0	0	0	0	0	0	0	0	0	2	0	0	0	0	0	0	0	0	1
ENSG00000075391	RASAL2	1677	1210	1401	1463	1300	840	1124	1057	1594	1820	1128	1096	1176	1132	1345	976	847	1247	1074	1472	1819	1808	1618	1317	2008	1547	1530	1315	1618	1737
ENSG00000075399	VPS9D1	108	87	99	97	108	58	91	85	119	127	77	69	93	71	88	60	44	89	79	67	97	102	90	87	155	109	74	113	101	122
ENSG00000075407	ZNF37A	2246	1615	1702	2031	1485	1274	1562	1342	2510	2162	1623	1477	1587	1503	1302	1415	1357	1420	1479	1898	2800	2956	2407	1845	2463	2420	2055	1686	1966	2541
ENSG00000075413	MARK3	4043	2915	3059	3593	2814	2132	2779	2480	4104	3775	2631	2606	2720	2765	2708	2425	2157	3019	2499	3668	4679	4489	3708	3552	5098	4018	3625	3303	3902	4334
ENSG00000075415	SLC25A3	17638	12850	13444	14960	11750	8946	12215	10827	15855	16122	11521	11813	12383	12309	12268	13003	11944	17109	13880	15209	23240	24459	16786	17267	23094	21484	19587	16404	21855	19101
ENSG00000075420	FNDC3B	3227	2345	2614	2874	2437	1560	2191	2017	3235	3391	2188	2138	2303	2392	2227	2455	2047	2902	2372	3606	4356	4190	3714	3142	5183	3835	3551	2983	3583	4333
ENSG00000075426	FOSL2	1334	959	868	974	799	598	902	795	1262	1189	878	925	975	867	848	730	603	1070	761	1061	1384	1370	1190	1009	1900	1257	1033	1051	1069	1303
ENSG00000075429	CACNG5	1	2	0	1	0	0	0	0	0	0	0	0	0	0	0	0	0	0	1	1	0	0	1	0	0	2	0	0	0	0
ENSG00000075461	CACNG4	17	15	4	12	2	7	10	12	35	15	14	15	11	6	11	8	7	12	11	4	15	13	16	15	3	16	11	4	12	4
ENSG00000075539	FRYL	3853	2854	2885	3322	2516	2267	2670	2177	3955	3372	2770	2532	2466	2521	2136	2913	2441	2271	2739	3143	5405	5395	3528	3438	4014	4650	3750	2350	3546	4148
ENSG00000075568	TMEM131	2871	2055	2235	2386	2046	1412	1899	1859	2803	2832	1840	1886	2002	1835	1896	1755	1634	1911	1789	2436	3324	3120	2800	2511	3342	2734	2413	2017	2456	3015
ENSG00000075618	FSCN1	517	336	321	369	303	252	364	208	464	365	285	295	284	299	335	242	253	433	326	409	489	505	418	381	673	513	440	415	539	508
ENSG00000075624	ACTB	93881	65486	61916	76607	54548	43834	63583	50252	83315	82166	60503	60091	56521	63447	58801	59746	53990	75931	63075	68700	108537	108010	81471	80756	103534	98392	87987	74891	95797	79556
ENSG00000075643	MOCOS	1813	1381	1667	1617	1407	957	1195	1282	1712	2014	1159	1204	1533	1194	1437	1346	1248	2259	1382	2376	2388	2494	2570	1872	3752	2229	1960	2342	2091	3028
ENSG00000075651	PLD1	33	13	47	20	42	22	22	27	36	76	16	14	31	14	40	17	19	59	24	103	28	31	61	32	137	32	16	50	32	125
ENSG00000075673	ATP12A	9	7	8	6	8	2	9	4	6	12	5	5	4	10	4	5	3	5	4	5	9	10	3	5	11	5	5	5	4	6
ENSG00000075702	WDR62	1267	879	850	1025	809	602	885	717	1326	1178	878	863	801	885	854	1105	871	1009	1100	881	1880	1907	1285	1458	1493	1781	1563	1154	1711	1187
ENSG00000075711	DLG1	3537	2686	3058	3283	2663	2101	2569	2431	3907	3751	2699	2461	2827	2668	2466	2496	2206	2823	2716	3433	4748	4736	3738	3471	4646	3988	3449	2564	3689	4617
ENSG00000075785	RAB7A	6647	4796	4836	5648	4622	3366	4523	4022	6094	6320	4313	4332	4570	4676	4670	4240	3596	5786	4504	5696	7406	7765	5882	5532	8722	6942	6249	5578	6839	7206
ENSG00000075790	BCAP29	760	577	773	836	627	485	517	523	833	907	542	602	692	540	562	605	617	761	765	1144	1358	1402	960	944	1216	934	815	672	917	1393
ENSG00000075826	SEC31B	112	76	79	91	102	54	56	78	136	114	91	68	87	61	62	62	50	64	67	79	102	90	119	79	164	94	84	81	85	100
ENSG00000075856	SART3	2727	2142	1861	2238	1693	1431	1892	1816	3216	2473	2308	2191	2270	2413	2037	2190	1947	2454	2314	1862	4448	4094	3249	3119	3828	3888	3305	2491	3449	3014
ENSG00000075884	ARHGAP15	2	0	0	0	0	0	0	0	0	0	0	0	0	0	0	0	0	0	0	0	0	0	0	0	0	0	0	0	0	0
ENSG00000075886	TUBA3D	83	50	55	42	30	48	55	40	65	47	51	58	35	48	19	95	62	39	52	8	129	153	42	78	18	145	115	50	92	9
ENSG00000075891	PAX2	8	0	4	0	4	0	1	0	4	4	3	1	1	6	3	2	1	3	2	4	3	5	7	2	6	5	2	0	3	1
ENSG00000075914	EXOSC7	1694	1177	1169	1392	1018	814	1128	1053	1613	1486	1127	1171	1065	1128	1019	1133	962	1303	1135	1054	2071	1999	1366	1443	1723	1943	1762	1340	1785	1486
ENSG00000075945	KIFAP3	714	483	578	623	550	417	461	447	698	712	515	502	633	472	502	447	443	555	529	834	930	889	765	737	951	710	657	570	738	993
ENSG00000075975	MKRN2	924	717	799	785	618	486	602	607	871	898	567	592	673	598	609	593	579	803	701	955	1167	1163	934	919	1285	983	902	809	933	1115
ENSG00000076003	MCM6	4011	2957	2772	3394	2483	2080	2585	2079	3700	3442	2484	2608	2575	2882	2574	3850	3267	3699	3975	3184	6985	7077	4246	4800	4284	6409	5373	3675	6167	3959
ENSG00000076043	REXO2	832	545	670	710	560	394	518	534	766	743	493	503	586	510	606	625	548	865	702	969	1216	1239	948	856	1266	892	884	724	946	1208
ENSG00000076053	RBM7	373	263	311	337	255	161	237	195	383	342	258	237	281	222	219	245	228	328	278	382	480	488	381	331	483	347	339	308	368	461
ENSG00000076067	RBMS2	491	342	433	413	378	249	307	368	484	541	338	333	384	389	403	339	272	419	344	502	581	639	550	478	693	549	454	446	452	639
ENSG00000076108	BAZ2A	5989	4548	4264	5178	3880	3021	4184	3833	6160	5711	4372	4210	4285	4477	4177	3861	3232	4124	4006	4397	7057	6737	5539	4863	7315	6247	5594	4752	5692	5549
ENSG00000076201	PTPN23	2097	1446	1560	1619	1363	1049	1472	1238	2070	2096	1539	1384	1504	1609	1522	1411	1313	1534	1360	1649	2442	2350	2021	1795	2722	2347	2088	1840	2305	2039
ENSG00000076242	MLH1	2886	2011	2371	2533	1844	1468	2014	1733	2739	2641	2001	1996	2044	2053	2024	2350	2130	2551	2415	2724	4263	4551	2740	2997	3707	4003	3641	2527	3775	3219
ENSG00000076248	UNG	2666	1891	1653	2177	1483	1364	1788	1312	2361	2150	1779	1757	1531	1789	1587	2168	1996	2443	2329	1771	3917	4021	2461	2933	2514	3758	3216	2289	3473	2244
ENSG00000076258	FMO4	53	52	50	34	40	31	26	52	69	60	53	47	37	47	44	42	35	35	29	54	43	49	50	38	66	43	58	39	63	70
ENSG00000076321	KLHL20	1345	965	848	1033	709	694	927	773	1285	988	893	926	950	901	759	800	661	931	821	835	1428	1558	1160	1010	1424	1368	1112	988	1231	1237
ENSG00000076344	RGS11	8	6	7	3	12	5	6	4	9	4	7	8	15	9	4	4	2	4	6	2	8	3	13	7	13	5	4	1	8	4
ENSG00000076351	SLC46A1	318	243	208	290	175	136	237	179	324	274	218	233	178	242	218	191	205	289	237	237	411	480	297	319	383	398	376	270	388	327
ENSG00000076356	PLXNA2	73	48	74	40	55	39	51	68	69	81	54	24	54	63	55	36	33	68	44	73	54	74	91	55	127	61	49	78	41	84
ENSG00000076382	SPAG5	5040	3706	3454	4132	3012	2441	3228	2697	4607	4488	3296	3464	3058	3545	3189	3949	3425	3651	4200	3493	7163	7158	4065	5200	5445	6755	6075	3666	6680	4341
ENSG00000076513	ANKRD13A	2195	1704	2138	2055	1863	1145	1569	1649	2199	2411	1442	1478	1845	1571	1789	1539	1356	2056	1720	2591	2750	2817	2651	2176	3727	2467	2308	2328	2486	3194
ENSG00000076554	TPD52	3464	2519	2887	3081	2278	1810	2473	2097	3221	3064	2488	2484	2711	2487	2221	3062	2607	2822	2973	2828	5934	5770	3405	3935	3834	5031	4096	2676	4031	4108
ENSG00000076555	ACACB	997	755	738	884	669	568	754	674	1154	944	800	741	755	773	725	708	636	764	720	857	1162	1242	1020	994	1530	1163	1059	915	1111	1124
ENSG00000076604	TRAF4	6324	4699	5023	5389	4334	3129	4425	4059	5780	5819	4163	4136	4290	4456	4212	3793	3350	5878	4016	5113	6804	7164	5677	5359	8336	6636	6225	5889	6569	6257
ENSG00000076641	PAG1	1535	1133	1276	1314	1230	762	1057	968	1517	1642	995	961	1162	986	1159	1178	988	1305	1257	1561	2180	2332	1857	1724	2045	1830	1744	1435	1764	2015
ENSG00000076650	GPATCH1	905	718	762	830	621	470	658	602	913	849	655	598	656	638	659	543	540	759	619	768	1120	1120	901	854	1103	1022	959	760	941	933
ENSG00000076662	ICAM3	536	336	347	406	297	254	358	286	438	409	346	353	297	370	349	338	260	546	344	316	491	597	393	384	569	543	490	429	488	469
ENSG00000076685	NT5C2	4318	3412	3915	4135	3417	2392	2962	2908	4443	4815	2995	2985	3543	3302	3225	3112	2686	3772	3219	4245	5638	5887	4283	4206	5799	4943	4345	3440	4803	5232
ENSG00000076706	MCAM	23	28	21	33	32	12	28	16	29	40	23	15	26	24	27	16	9	45	18	54	41	44	33	32	63	24	39	57	43	44
ENSG00000076716	GPC4	294	251	245	302	232	145	232	208	359	363	220	222	248	260	259	244	166	278	253	301	397	396	310	301	456	309	307	273	322	344
ENSG00000076770	MBNL3	870	658	791	813	725	495	605	602	860	1024	596	619	742	636	604	623	587	672	692	1003	1206	1245	1071	937	1221	966	823	771	937	1415
ENSG00000076826	CAMSAP3	1492	1116	1018	1122	865	673	1013	819	1404	1381	1045	982	1064	1096	994	849	808	1142	942	960	1662	1665	1430	1357	1862	1588	1388	1309	1489	1283
ENSG00000076864	RAP1GAP	566	381	391	453	415	275	361	315	499	590	357	351	392	393	421	341	295	467	391	532	627	609	465	419	837	582	523	461	570	588
ENSG00000076924	XAB2	2254	1771	1648	1917	1545	1184	1649	1361	2266	2312	1770	1629	1648	1685	1868	1602	1467	2242	1679	1821	2935	3055	2253	2304	3317	2945	2535	2185	2846	2414
ENSG00000076928	ARHGEF1	600	523	433	480	393	308	412	366	651	550	457	419	430	479	454	376	339	539	367	398	663	732	523	566	779	620	585	517	672	529
ENSG00000076944	STXBP2	981	679	689	832	587	457	702	568	949	875	690	648	617	691	638	529	449	805	564	669	940	902	748	754	1278	917	859	891	912	910
ENSG00000076984	MAP2K7	1815	1351	1187	1405	1021	912	1284	970	2072	1705	1416	1340	1410	1478	1357	1153	1079	1480	1357	1152	2403	2299	1893	1760	2314	2058	1819	1560	1929	1621
ENSG00000077009	NMRK2	3	0	0	0	0	0	0	0	0	1	0	0	0	0	0	0	0	0	0	0	0	0	0	0	0	0	0	0	0	0
ENSG00000077044	DGKD	1164	894	979	1048	851	590	866	886	1302	1217	869	823	945	917	868	795	681	1035	760	1017	1393	1402	1434	1057	1911	1352	1155	1107	1277	1415
ENSG00000077063	CTTNBP2	12	6	7	12	13	2	1	3	8	14	2	5	8	6	3	8	3	6	4	7	6	12	5	7	10	10	10	8	5	9
ENSG00000077080	ACTL6B	1	0	2	0	0	0	0	2	0	0	0	0	0	0	0	1	0	0	0	0	0	0	0	0	0	2	0	0	0	0
ENSG00000077092	RARB	336	223	235	273	183	199	220	166	261	244	221	242	179	196	162	248	224	204	211	176	410	452	258	206	242	359	300	192	310	213
ENSG00000077097	TOP2B	4723	3585	3948	4497	3501	2619	3249	2883	4976	4566	3389	3441	3759	3517	3201	3292	3023	3482	3420	4274	6578	6536	5096	4738	5857	5118	4606	3503	4888	6396
ENSG00000077147	TM9SF3	5098	4092	4835	5055	4166	3035	3417	3298	5394	5120	3698	3811	4466	3497	3767	3665	3786	4207	4377	6258	8554	7652	6155	6025	6882	5494	5036	4016	5487	9099
ENSG00000077150	NFKB2	1103	775	689	874	649	557	732	603	1033	953	766	786	730	822	755	649	582	817	652	718	1146	1193	977	808	1223	1062	910	851	1016	922
ENSG00000077152	UBE2T	2061	1452	1541	1591	1284	1020	1268	1131	1779	1843	1274	1298	1354	1329	1261	1562	1478	1845	1638	1544	2958	3105	1651	2174	2056	2698	2510	1558	2792	1734
ENSG00000077157	PPP1R12B	1487	1241	1245	1374	1185	914	1186	1067	1790	1582	1160	1032	1171	1160	1068	1012	827	1052	1008	1362	1770	1817	1543	1265	1959	1628	1454	1249	1467	1562
ENSG00000077232	DNAJC10	2402	1945	2539	2451	2043	1581	1781	1858	2510	2885	1719	1865	2235	1813	1888	2225	2000	3027	2408	4002	4365	4375	4023	3107	4765	3438	3042	2812	3304	5496
ENSG00000077235	GTF3C1	11524	8341	7311	9327	7027	5465	7644	6392	11604	10214	8337	8252	7597	8726	7885	7561	6469	8237	7827	7396	13920	13512	10366	10309	14158	12883	11039	9119	11663	10238
ENSG00000077238	IL4R	190	128	136	137	124	104	97	125	176	195	146	131	118	134	132	64	69	150	80	141	139	174	170	110	251	133	99	150	136	200
ENSG00000077254	USP33	1893	1527	1843	2049	1556	1175	1389	1390	2176	2241	1452	1360	1709	1502	1399	1619	1506	1739	1856	2624	3202	3367	2510	2421	2933	2417	2155	1682	2422	3281
ENSG00000077264	PAK3	12	11	9	4	7	6	8	4	12	17	7	6	7	4	7	8	5	11	8	5	8	18	15	16	22	7	9	18	8	19
ENSG00000077274	CAPN6	2	1	4	1	0	1	3	0	3	1	3	0	1	0	2	1	1	1	0	1	3	0	0	2	0	1	1	4	0	1
ENSG00000077279	DCX	1	0	5	0	0	0	0	0	1	2	2	1	0	0	0	0	1	0	0	0	3	1	1	0	4	0	0	0	0	2
ENSG00000077312	SNRPA	2502	1793	1803	1993	1607	1175	1720	1538	2174	2382	1623	1711	1686	1703	1755	1819	1609	2129	1916	1960	3168	3280	2173	2419	3079	3198	2832	2090	3011	2299
ENSG00000077327	SPAG6	5	6	3	4	1	2	1	4	8	2	4	2	1	1	4	0	0	7	5	7	6	3	5	1	10	8	1	2	5	6
ENSG00000077348	EXOSC5	354	245	244	314	240	198	255	208	313	295	229	243	216	245	258	230	231	354	243	308	397	507	311	327	433	489	436	368	433	361
ENSG00000077380	DYNC1I2	1619	1209	1317	1424	1135	941	1094	1027	1625	1666	1080	1189	1336	1191	1216	1129	1003	1444	1283	1541	2043	2146	1676	1467	2241	2003	1723	1421	1968	2133
ENSG00000077420	APBB1IP	1	0	0	0	0	0	0	0	0	0	0	0	1	0	1	0	0	0	0	0	0	0	1	0	0	0	0	0	0	0
ENSG00000077454	LRCH4	1736	1322	1372	1528	1254	840	1235	1151	1788	1747	1246	1183	1208	1242	1284	983	789	1346	1085	1484	1664	1667	1578	1366	2356	1789	1483	1558	1613	1606
ENSG00000077458	FAM76B	545	369	487	478	432	310	355	381	559	573	378	361	449	388	328	368	381	458	478	609	801	768	543	535	711	650	565	416	617	693
ENSG00000077463	SIRT6	819	581	548	642	532	426	612	416	716	675	518	526	458	543	557	443	389	712	544	661	804	830	705	603	1102	859	677	757	870	672
ENSG00000077498	TYR	1	0	0	0	0	0	0	0	0	0	0	0	0	0	0	0	1	0	0	0	0	0	0	0	0	0	0	0	0	0
ENSG00000077514	POLD3	1441	884	978	1199	890	687	851	725	1234	1330	845	894	841	848	824	1093	976	1065	1123	1018	2035	1971	1248	1424	1347	1664	1509	1032	1613	1226
ENSG00000077522	ACTN2	2	0	1	0	0	0	0	0	0	0	0	0	0	0	1	2	1	0	0	0	3	2	0	0	0	0	0	0	0	0
ENSG00000077549	CAPZB	4312	3041	3111	3540	2615	2092	3164	2510	3829	3881	2848	2877	2968	3064	2844	2808	2398	3819	2783	3199	4921	5178	3770	3702	5170	4723	4167	3749	4612	3802
ENSG00000077585	GPR137B	395	263	322	341	275	223	248	268	430	417	252	245	288	276	273	204	223	368	251	429	421	441	437	314	579	354	317	376	384	523
ENSG00000077616	NAALAD2	16	6	11	13	8	8	6	12	11	11	9	15	8	6	4	3	5	10	17	9	11	16	10	6	18	10	9	2	15	24
ENSG00000077684	JADE1	844	717	778	795	728	435	542	651	901	1021	614	595	697	703	725	693	655	871	775	966	1397	1284	1119	1093	1579	1204	1045	958	1193	1250
ENSG00000077713	SLC25A43	6	5	5	2	4	3	3	0	5	5	1	2	3	2	3	4	2	3	1	1	6	9	6	3	3	4	5	4	3	8
ENSG00000077721	UBE2A	1740	1295	1348	1559	1228	951	1232	1062	1727	1710	1157	1259	1224	1183	1163	1103	1076	1596	1327	1798	2342	2225	1708	1789	2395	1883	1680	1344	1828	2403
ENSG00000077782	FGFR1	773	554	464	635	513	380	537	479	724	707	547	520	570	546	549	369	326	477	409	473	717	669	528	491	736	665	561	561	591	605
ENSG00000077800	FKBP6	0	0	0	0	0	0	0	0	0	0	0	0	0	0	0	0	0	0	0	0	1	0	0	0	0	0	0	0	0	0
ENSG00000077935	SMC1B	3	0	0	0	0	0	0	0	0	0	0	0	0	0	0	0	0	0	1	0	0	0	0	0	0	0	0	0	0	0
ENSG00000077942	FBLN1	18	6	9	8	9	8	8	7	7	5	7	16	6	7	4	6	15	9	5	15	14	12	17	8	13	12	12	14	8	13
ENSG00000077943	ITGA8	6	8	5	2	2	2	0	4	4	6	1	1	2	0	5	1	2	0	2	1	13	3	2	5	9	3	1	2	1	5
ENSG00000077984	CST7	1	0	0	0	0	0	0	0	0	0	1	0	0	0	1	1	0	0	0	0	0	0	0	0	0	1	0	0	1	0
ENSG00000078018	MAP2	1346	923	923	1201	759	746	901	699	1274	1110	915	863	899	846	733	1153	963	820	1036	793	2029	2075	1191	1301	1140	1784	1615	858	1479	1022
ENSG00000078043	PIAS2	1920	1487	1635	1844	1487	1032	1290	1316	1958	2048	1413	1340	1544	1376	1337	1319	1276	1568	1414	1882	2781	2531	2002	1826	2268	2172	2046	1516	2018	2357
ENSG00000078053	AMPH	4	0	0	0	0	0	2	0	0	0	5	0	0	0	0	0	0	0	1	0	0	0	0	0	0	0	0	1	0	0
ENSG00000078061	ARAF	2527	1829	1854	2173	1629	1232	1854	1527	2378	2305	1722	1591	1592	1708	1807	1583	1403	2018	1655	1796	2676	2767	2142	2040	3038	2710	2321	2109	2513	2139
ENSG00000078070	MCCC1	5210	3963	4281	4464	3496	2708	3629	3557	5167	5191	3546	3644	4135	3774	3630	3053	2721	4613	3187	3891	5707	5831	5083	4125	6422	5054	4565	4557	4939	5553
ENSG00000078081	LAMP3	0	2	0	3	0	3	1	0	0	0	0	1	2	0	0	1	1	7	0	4	2	1	4	0	7	2	2	0	4	5
ENSG00000078098	FAP	1	0	1	1	0	0	0	0	0	0	0	0	0	0	1	0	0	0	0	0	0	0	2	0	0	0	4	0	0	1
ENSG00000078114	NEBL	484	381	538	431	478	303	357	390	537	667	318	359	461	332	407	229	213	605	322	906	523	500	671	394	1176	343	385	534	407	1317
ENSG00000078124	ACER3	246	163	195	216	183	156	172	167	225	217	154	165	143	142	130	171	178	166	194	272	363	283	256	252	298	294	235	175	259	313
ENSG00000078140	UBE2K	3771	3030	3265	3614	2914	2245	2760	2269	4015	3930	2775	2921	3151	2892	2632	3016	2895	3427	3397	4138	6145	6214	4227	4530	4773	4788	4198	3243	4655	5436
ENSG00000078142	PIK3C3	1116	891	935	1062	852	637	832	720	1163	1179	787	816	890	812	771	761	701	1068	862	1250	1459	1440	1303	1026	1647	1251	1077	1053	1239	1756
ENSG00000078177	N4BP2	1144	970	1152	1078	990	691	845	868	1314	1404	856	796	1047	843	904	799	697	857	782	1262	1438	1582	1437	1019	1516	1200	1029	983	1025	1710
ENSG00000078237	TIGAR	498	393	400	496	334	299	334	301	508	499	362	339	343	345	299	295	305	404	367	463	642	662	452	462	532	486	420	324	500	580
ENSG00000078246	TULP3	1004	757	868	857	723	567	656	644	952	985	635	688	768	698	687	638	556	976	729	955	1224	1223	1037	915	1516	1163	1036	908	988	1153
ENSG00000078269	SYNJ2	206	166	154	155	132	121	173	128	206	167	143	168	142	148	136	119	136	124	114	164	230	200	193	176	250	256	189	164	189	222
ENSG00000078295	ADCY2	6	0	1	0	0	0	1	0	0	0	2	1	0	0	0	0	0	1	0	0	2	0	2	0	0	0	0	0	0	0
ENSG00000078304	PPP2R5C	4114	3035	3651	3923	3131	2389	2846	2687	4087	4198	2808	2889	3395	3048	3032	3170	2813	3859	3520	4482	6060	5990	4476	4525	5760	4913	4516	3530	5002	5939
ENSG00000078319	PMS2P1	449	316	360	396	268	242	337	298	429	455	316	302	339	350	311	303	313	448	342	353	580	627	445	415	634	537	544	427	512	519
ENSG00000078328	RBFOX1	8	0	1	0	0	0	0	0	1	0	0	0	0	0	0	0	0	0	0	0	0	0	0	0	0	1	1	0	0	0
ENSG00000078369	GNB1	16142	11847	12393	14078	11239	8285	11064	9776	15226	15799	10704	10926	11548	11412	11491	9790	8676	13648	10932	14336	18150	18521	15548	13749	21745	15820	14844	13733	16336	18320
ENSG00000078399	HOXA9	6	2	2	6	3	2	0	2	3	2	4	3	1	0	3	2	1	6	9	4	3	4	3	2	8	4	0	3	2	5
ENSG00000078401	EDN1	6	6	9	14	4	3	7	5	6	5	3	1	10	1	0	1	3	7	1	2	4	6	4	0	2	5	1	8	3	4
ENSG00000078403	MLLT10	1201	868	1033	1034	846	687	798	856	1164	1158	825	820	969	817	766	804	673	950	840	1066	1453	1573	1209	1062	1386	1267	1127	956	1154	1324
ENSG00000078487	ZCWPW1	93	58	87	80	63	50	54	71	110	92	59	51	83	61	79	47	25	74	56	90	61	98	89	76	126	71	86	73	84	105
ENSG00000078549	ADCYAP1R1	7	0	0	1	0	0	0	1	0	1	0	0	0	0	0	0	0	0	0	0	0	0	1	0	0	0	0	0	0	0
ENSG00000078579	FGF20	0	0	0	0	0	0	0	0	0	1	0	0	0	0	0	0	0	0	0	0	0	0	0	0	0	0	0	0	0	0
ENSG00000078589	P2RY10	0	0	0	0	0	0	0	0	0	0	0	0	0	0	0	0	0	0	0	0	0	0	0	0	0	0	0	0	0	0
ENSG00000078596	ITM2A	0	0	0	0	0	0	1	1	1	0	0	1	0	1	0	0	0	0	0	0	0	1	0	0	0	0	0	0	1	0
ENSG00000078618	NRDC	4524	3483	3812	4325	3247	2462	3199	3152	4875	4480	3368	3224	3722	3278	3131	3375	2922	3776	3499	4026	6196	6331	4853	4357	5892	5612	4642	3787	5047	5459
ENSG00000078668	VDAC3	4396	3246	3408	3668	2802	2491	2762	2633	4087	4154	2813	2980	3085	3138	2926	3391	3075	4131	3719	3714	6072	6504	4000	4571	5208	5729	5213	3764	5927	4847
ENSG00000078674	PCM1	5163	3956	4613	4664	3999	2876	3482	3546	5315	5537	3614	3651	4261	3709	3643	3704	3524	3929	3890	5248	6764	7294	6051	4921	7073	6081	5763	4444	5628	6871
ENSG00000078687	TNRC6C	1613	1328	1220	1429	1200	764	1194	1150	1917	1741	1164	1165	1282	1333	1283	977	870	1196	1075	1257	1931	1743	1431	1414	2169	1587	1393	1237	1549	1678
ENSG00000078699	CBFA2T2	3188	2230	2874	2729	2433	1580	2048	2448	3130	3530	2117	2014	2486	2170	2276	1921	1751	3059	2028	3836	3422	3486	3973	2644	5600	3052	2812	3198	3023	4486
ENSG00000078725	BRINP1	10	8	6	11	8	4	7	2	7	8	11	8	10	11	4	3	11	8	5	6	21	15	7	9	16	11	10	10	8	8
ENSG00000078747	ITCH	2748	2231	2330	2633	2071	1631	2018	1815	2994	2945	1999	2017	2302	2057	1947	2024	1894	2345	2202	2884	3816	3833	3057	2626	3410	3123	2873	2258	3177	3678
ENSG00000078795	PKD2L2	11	5	7	8	12	6	4	9	11	15	6	7	4	4	6	15	4	18	4	15	16	16	12	11	18	8	5	8	19	23
ENSG00000078804	TP53INP2	2211	1598	1480	1726	1472	963	1434	1195	2004	2177	1411	1326	1362	1454	1406	950	853	1175	1097	1859	1860	1779	1560	1436	3058	1655	1527	1321	1684	2155
ENSG00000078808	SDF4	5871	4204	3820	4716	3505	2726	4231	3366	5645	5120	4110	4122	4171	4451	4087	3369	3099	4866	3616	3709	6477	6709	5151	4857	7357	6120	5609	5487	5951	5320
ENSG00000078814	MYH7B	13	5	6	5	4	5	7	5	12	5	3	4	12	9	9	5	3	3	1	5	18	9	9	6	10	8	10	9	12	3
ENSG00000078898	BPIFB2	0	0	0	0	0	0	0	1	0	1	0	0	0	1	0	0	0	1	2	0	0	0	0	0	0	1	0	0	0	0
ENSG00000078900	TP73	323	230	219	279	226	165	201	160	284	308	235	235	203	231	246	211	210	270	237	266	377	376	318	269	459	338	293	269	345	313
ENSG00000078902	TOLLIP	2352	1808	1803	1993	1743	1199	1678	1555	2265	2442	1749	1724	1809	1864	1865	1477	1229	2213	1487	2030	2578	2742	2280	1922	3396	2523	2258	2242	2541	2521
ENSG00000078967	UBE2D4	1607	1201	1264	1486	1200	830	1105	1035	1508	1647	1088	1005	1191	1114	1220	931	862	1415	1020	1360	1745	1814	1513	1386	2187	1644	1524	1378	1644	1683
ENSG00000079101	CLUL1	65	49	71	59	42	35	61	40	66	69	32	34	66	61	54	50	39	94	50	115	69	112	97	77	174	82	73	72	86	135
ENSG00000079102	RUNX1T1	4	0	0	0	0	0	0	0	0	0	0	1	0	0	0	0	0	3	1	0	0	0	0	0	0	0	0	1	0	0
ENSG00000079112	CDH17	1	0	0	1	0	0	1	3	0	3	0	0	0	1	0	0	0	0	0	3	0	0	0	0	0	0	0	0	1	1
ENSG00000079134	THOC1	1442	1150	1365	1452	1212	830	1019	1086	1579	1569	1056	1063	1143	1061	1027	1152	1079	1228	1266	1436	2308	2173	1612	1526	2031	1910	1710	1265	1814	2098
ENSG00000079150	FKBP7	92	91	94	107	80	54	83	68	89	85	79	69	65	77	57	95	68	88	110	111	170	164	115	115	150	105	106	94	132	132
ENSG00000079156	OSBPL6	303	246	316	298	309	176	214	266	309	395	207	204	252	206	270	187	169	306	187	352	344	389	374	233	531	290	303	309	305	517
ENSG00000079215	SLC1A3	235	153	176	223	171	130	162	145	247	234	166	170	146	137	174	184	148	203	187	151	360	358	225	247	241	307	261	182	305	208
ENSG00000079246	XRCC5	16953	12522	13220	15086	11132	9103	11177	9909	15997	16398	11259	12014	12318	12366	11570	14121	12681	14411	14945	14566	25926	26667	16012	18143	20136	22869	20372	14030	23008	18275
ENSG00000079257	LXN	4	4	1	5	5	4	3	6	12	8	3	3	5	6	4	2	5	7	3	5	8	4	4	2	8	8	12	3	15	9
ENSG00000079263	SP140	3	0	1	1	1	0	1	4	0	4	1	1	4	2	0	2	2	1	0	0	2	1	2	4	2	2	2	2	0	1
ENSG00000079277	MKNK1	1255	921	1020	1062	921	648	954	776	1319	1188	904	841	898	909	880	731	673	863	794	879	1490	1408	1129	1012	1377	1256	1090	885	1173	1063
ENSG00000079308	TNS1	80	67	44	60	49	44	40	42	97	66	67	66	35	62	51	63	49	51	51	76	144	125	74	98	97	99	108	59	90	75
ENSG00000079313	REXO1	1577	1174	1021	1239	914	717	1033	842	1633	1386	1198	1117	1055	1136	1039	1091	921	1027	1086	984	2161	1900	1389	1554	1801	1908	1574	1283	1650	1242
ENSG00000079332	SAR1A	3678	2721	2860	3271	2555	2049	2477	2054	3617	3369	2561	2643	2813	2546	2410	2912	2520	3352	2923	3734	5533	5433	3804	3993	4732	4455	4054	3160	4611	4617
ENSG00000079335	CDC14A	358	299	397	345	345	214	264	357	381	487	280	256	405	307	366	301	281	387	333	601	557	574	568	425	749	477	477	425	444	747
ENSG00000079337	RAPGEF3	153	105	115	147	112	78	121	83	209	156	145	144	147	136	139	106	80	187	120	154	207	217	222	145	312	175	163	168	183	236
ENSG00000079385	CEACAM1	16	13	23	24	17	15	7	21	18	15	13	13	13	11	17	9	11	14	21	23	12	24	15	9	25	16	13	15	22	29
ENSG00000079387	SENP1	1600	1202	1307	1411	1125	852	1081	992	1579	1627	1105	1048	1186	1019	1148	1203	1126	1352	1251	1427	2178	2314	1536	1627	1902	2026	1765	1295	1798	1800
ENSG00000079393	DUSP13	4	2	0	3	1	0	0	0	0	4	1	1	1	0	0	0	0	0	0	0	1	0	1	0	0	0	1	0	0	0
ENSG00000079432	CIC	2063	1598	1470	1595	1189	973	1395	1210	2342	2044	1593	1525	1686	1729	1629	1111	1057	1357	1240	1343	2249	2025	2071	1661	2658	2053	1672	1688	1926	1810
ENSG00000079435	LIPE	2	3	0	0	1	0	3	1	3	1	2	0	3	0	0	0	0	1	2	1	2	3	2	1	2	3	3	0	0	0
ENSG00000079459	FDFT1	6287	4451	5008	5287	4091	3092	4218	3921	5692	5644	4069	4141	4726	4358	4269	4536	4077	5532	4281	6008	7936	7986	5582	5441	9001	7704	6698	5272	6836	7581
ENSG00000079462	PAFAH1B3	1554	1085	1163	1302	945	763	1133	908	1348	1324	996	1072	972	1044	1000	967	834	1680	944	1340	1575	1914	1302	1250	1945	1727	1557	1524	1670	1513
ENSG00000079482	OPHN1	837	551	758	682	663	381	566	532	723	886	571	582	640	598	549	485	395	587	455	735	816	848	737	583	1079	732	668	624	689	908
ENSG00000079557	AFM	0	0	0	0	0	0	0	0	2	0	0	0	0	0	0	0	0	1	3	0	1	0	1	0	0	0	0	0	0	0
ENSG00000079616	KIF22	5113	3578	2989	3845	2759	2392	3175	2484	4192	3598	3137	3253	2714	3318	2736	3769	3242	3937	3755	3006	6761	7089	3734	4823	4967	7006	5781	3918	6119	4057
ENSG00000079689	SCGN	1	0	0	0	2	0	0	0	3	0	2	0	2	3	1	0	0	0	0	1	0	0	1	0	1	0	0	0	1	0
ENSG00000079691	CARMIL1	953	705	780	870	628	504	659	585	963	989	620	663	669	642	679	672	518	748	675	815	1139	1268	941	833	1142	1087	1006	713	977	960
ENSG00000079739	PGM1	1617	1205	1353	1407	1132	853	1111	1016	1576	1743	1079	1056	1127	1169	1303	993	959	1538	1075	1412	1773	1923	1715	1422	2299	1748	1481	1519	1615	1875
ENSG00000079785	DDX1	3635	2746	2845	3266	2505	2003	2553	2120	3706	3599	2386	2580	2855	2627	2423	2734	2541	3290	3046	3324	5238	5479	3841	3693	4937	4621	4149	3153	4685	4627
ENSG00000079805	DNM2	6652	4905	4534	5553	4029	3195	4755	3767	6497	6025	4650	4765	4544	5067	4842	4304	3999	5321	4714	4536	7932	8090	6098	5954	7859	7561	6596	5498	7109	5795
ENSG00000079819	EPB41L2	886	624	607	712	495	470	601	555	1033	865	745	691	646	700	611	664	633	739	758	671	1342	1438	1123	1006	1322	1196	1108	779	1174	956
ENSG00000079841	RIMS1	2042	1464	1807	1748	1689	1062	1387	1462	1933	2158	1316	1398	1722	1448	1576	1223	1050	2027	1341	2094	2106	2314	1888	1669	3160	1984	1703	1799	1987	2804
ENSG00000079931	MOXD1	1	1	0	3	2	0	0	3	0	1	0	0	5	1	1	1	0	2	0	4	2	2	2	1	0	0	0	1	0	0
ENSG00000079950	STX7	634	541	635	631	584	371	499	492	666	803	518	493	607	493	513	406	390	589	526	752	812	868	797	642	1014	717	596	601	731	1078
ENSG00000079974	RABL2B	145	107	111	116	79	73	92	97	131	110	97	103	87	78	103	94	67	114	87	165	164	186	136	152	196	160	143	115	176	159
ENSG00000079999	KEAP1	3854	2822	3024	3273	2688	1915	2759	2460	3668	3843	2525	2773	2844	2850	2814	2434	2118	3717	2523	2727	4506	4559	3462	3251	4845	4280	3839	3402	4060	3681
ENSG00000080007	DDX43	146	98	149	135	111	85	95	96	136	151	94	109	109	93	97	80	88	90	79	131	160	165	130	106	168	128	117	117	124	182
ENSG00000080031	PTPRH	7	5	3	2	5	4	2	4	12	6	6	3	10	6	9	3	2	9	1	4	10	5	2	1	4	0	7	6	5	11
ENSG00000080166	DCT	1	0	0	0	0	0	0	1	2	2	0	0	0	1	0	1	0	2	1	1	3	0	0	2	3	0	0	1	0	2
ENSG00000080189	SLC35C2	1277	886	909	969	863	568	817	741	1192	1207	819	867	841	875	856	742	690	1092	878	1096	1432	1513	1234	1085	1787	1362	1219	1142	1344	1309
ENSG00000080200	CRYBG3	822	618	697	758	556	436	524	498	881	854	534	589	619	596	577	490	505	495	538	678	997	1000	813	714	902	831	765	568	775	935
ENSG00000080224	EPHA6	3101	2134	2396	2614	2044	1716	2268	2068	3099	3037	2183	2191	2209	1949	2064	1886	1551	2158	2006	2433	3158	3612	3101	2438	3620	3161	2967	2583	2794	3045
ENSG00000080293	SCTR	2	0	0	0	0	0	0	0	0	0	0	0	0	0	0	0	0	0	0	0	0	0	0	0	0	1	0	0	0	0
ENSG00000080298	RFX3	672	454	667	665	733	349	490	526	753	1077	381	413	592	487	719	389	350	545	467	957	679	681	753	555	1173	560	555	562	630	1172
ENSG00000080345	RIF1	3659	2961	3121	3639	2607	2231	2587	2092	4020	3662	2715	2694	2906	2816	2325	3323	3213	2689	3586	3407	6957	6814	4398	4936	3740	4927	4582	2814	4469	4741
ENSG00000080371	RAB21	2121	1640	1735	1962	1596	1183	1594	1283	2139	2156	1499	1483	1666	1522	1441	1514	1439	1832	1632	2263	3073	2912	2289	2182	2826	2263	2114	1700	2237	2905
ENSG00000080493	SLC4A4	1558	1109	1151	1494	964	869	1066	840	1551	1370	1141	1085	962	1106	848	1225	959	1014	1237	980	2427	2326	1415	1610	1343	1957	1617	1034	1686	1297
ENSG00000080503	SMARCA2	1745	1319	1398	1461	1267	865	1232	1227	1995	1916	1387	1355	1480	1460	1384	1142	1037	1456	1136	1438	2142	2189	2107	1671	2825	1928	1796	1634	1863	2310
ENSG00000080511	RDH8	1	0	0	0	0	0	0	0	0	0	0	0	0	0	0	0	0	0	0	0	0	0	0	0	0	0	0	0	0	0
ENSG00000080546	SESN1	1429	1065	1319	1369	1316	795	1028	960	1434	1700	930	924	1213	1019	1164	891	832	1410	1029	1960	1832	1810	1768	1334	2303	1426	1267	1375	1575	2507
ENSG00000080561	MID2	814	575	725	722	620	401	615	527	801	846	575	539	627	574	555	459	439	745	534	777	866	844	767	596	1074	768	696	719	779	930
ENSG00000080572	PIH1D3	1	0	0	1	0	0	2	4	0	1	0	0	0	1	1	0	1	0	0	0	2	0	1	1	1	1	1	0	1	0
ENSG00000080573	COL5A3	6	0	0	0	0	0	0	0	0	0	0	1	0	0	5	0	0	0	1	0	0	0	2	2	0	0	0	0	0	0
ENSG00000080603	SRCAP	9527	7245	6508	7728	6021	4555	6563	5935	10793	9356	7515	7081	7430	7870	7130	6297	5463	6269	6608	5864	12149	11092	9327	8813	11513	11016	9206	7372	9598	8320
ENSG00000080608	PUM3	1273	919	968	1148	792	721	924	761	1336	1124	892	889	844	921	703	986	880	921	928	960	1914	1862	1169	1272	1223	1768	1419	967	1403	1260
ENSG00000080618	CPB2	2	0	0	0	0	0	0	0	0	0	0	0	0	0	0	0	0	0	0	0	0	0	0	0	0	1	0	0	0	0
ENSG00000080644	CHRNA3	17	16	18	12	16	11	9	11	20	19	13	17	13	14	8	12	14	23	16	10	15	18	19	11	31	19	18	17	17	25
ENSG00000080709	KCNN2	6438	4881	5737	5144	3050	3445	4691	4531	5689	4135	4360	4525	5007	3898	2989	4545	3953	5346	4059	3315	7841	7883	6881	5245	4480	7275	6433	5659	5936	3685
ENSG00000080802	CNOT4	1511	1047	1112	1245	974	783	1041	856	1447	1481	1076	1029	1122	968	1017	912	793	1084	1012	1204	1652	1686	1384	1204	1690	1398	1291	1104	1360	1320
ENSG00000080815	PSEN1	2665	2054	2144	2464	1833	1379	1851	1630	2641	2489	1843	1784	2023	1971	1720	1638	1517	2230	1870	2395	3276	3318	2598	2419	3381	2743	2486	2065	2700	3002
ENSG00000080819	CPOX	601	438	480	555	420	312	399	373	552	551	406	424	433	463	395	396	379	437	433	391	810	773	530	536	742	721	613	528	664	579
ENSG00000080822	CLDND1	629	471	633	564	441	363	439	492	590	635	441	449	563	468	480	462	410	580	476	676	869	947	593	626	837	686	680	509	674	901
ENSG00000080823	MOK	292	193	211	244	171	121	202	171	306	240	195	209	180	194	161	163	149	192	177	278	305	368	283	209	422	298	237	234	241	297
ENSG00000080824	HSP90AA1	66011	48187	45625	56965	38755	36133	43553	35903	66286	58681	45963	47782	48482	48142	40760	59573	55557	63290	67949	52918	112361	119620	74375	80325	82231	101115	90996	59354	104491	78447
ENSG00000080839	RBL1	1225	975	942	1156	877	757	851	700	1261	1159	845	945	826	947	832	1086	1017	975	1139	1142	2149	2202	1457	1378	1394	1739	1635	1053	1754	1392
ENSG00000080845	DLGAP4	2197	1626	1728	1866	1605	1026	1424	1325	2120	2257	1594	1524	1388	1603	1625	1328	1228	1597	1415	1983	2406	2357	1953	1779	2965	2246	1886	1824	2075	2243
ENSG00000080854	IGSF9B	380	297	265	262	226	174	252	194	529	320	324	274	305	269	255	197	174	231	212	234	353	304	380	291	458	343	260	285	283	302
ENSG00000080910	CFHR2	0	0	0	0	0	0	0	0	0	0	0	0	0	0	0	0	0	0	0	0	0	0	0	0	0	0	0	0	0	0
ENSG00000080947	CROCCP3	104	74	70	70	55	45	67	69	125	75	77	85	95	99	67	48	38	72	63	66	114	86	106	75	128	97	100	88	69	84
ENSG00000080986	NDC80	1629	1256	1276	1628	1211	1004	1123	942	1644	1614	1054	1189	1268	1194	1108	1624	1583	1466	1843	1635	3245	3332	1872	2183	2064	2504	2211	1375	2507	2304
ENSG00000081014	AP4E1	499	434	472	493	419	295	330	336	481	550	353	346	416	319	309	299	325	373	380	473	682	679	491	475	596	530	460	360	502	672
ENSG00000081019	RSBN1	776	616	724	703	647	429	548	540	823	809	549	567	615	585	518	548	531	739	617	909	1073	1075	850	858	1109	847	809	689	825	1243
ENSG00000081026	MAGI3	2013	1545	1651	1925	1610	998	1384	1341	1989	2334	1369	1316	1381	1485	1510	1149	1044	1490	1305	1909	2218	2308	2001	1662	2631	1995	1869	1624	2037	2543
ENSG00000081041	CXCL2	0	0	0	0	0	0	0	0	0	0	0	0	0	0	0	0	0	0	0	0	0	0	0	0	0	0	1	0	0	0
ENSG00000081051	AFP	7	3	0	5	7	1	4	5	1	8	4	3	1	3	6	2	6	1	9	6	6	4	6	5	5	8	4	1	6	6
ENSG00000081052	COL4A4	8	6	1	1	3	2	3	4	1	3	3	2	2	2	1	3	0	5	3	9	6	8	7	6	2	2	3	3	1	9
ENSG00000081059	TCF7	48	37	22	42	30	23	34	19	42	30	37	44	25	29	28	32	41	36	23	29	60	56	33	34	63	49	38	34	57	29
ENSG00000081087	OSTM1	561	441	567	629	519	353	385	405	600	659	436	445	541	443	438	422	432	564	527	752	862	920	731	709	963	692	623	575	707	1108
ENSG00000081138	CDH7	23	10	10	9	8	9	10	6	16	10	18	8	8	9	15	12	14	20	14	19	20	24	22	24	29	22	17	9	24	23
ENSG00000081148	IMPG2	4	11	13	6	16	4	10	10	13	20	6	10	6	6	5	7	7	7	8	10	9	11	15	10	11	7	7	6	2	11
ENSG00000081154	PCNP	2229	1767	2008	2296	1723	1341	1584	1468	2375	2399	1703	1775	2098	1666	1584	1788	1662	2222	2028	2736	3584	3616	2571	2654	3145	2744	2496	1998	2871	3424
ENSG00000081177	EXD2	1663	1175	1331	1470	1200	893	1135	1008	1560	1636	1129	1164	1182	1230	1192	1028	926	1305	1061	1521	1944	1923	1550	1364	2099	1682	1461	1395	1669	1741
ENSG00000081181	ARG2	3466	2554	3140	2761	2288	1668	2381	2367	3178	3204	2323	2542	3014	2479	2345	2211	2143	3800	2592	3085	3982	4601	3787	3193	4388	3975	3684	3387	4013	3878
ENSG00000081189	MEF2C	3	0	0	0	0	0	1	0	0	0	0	0	2	0	0	0	0	2	0	0	0	0	0	0	2	0	0	0	2	1
ENSG00000081237	PTPRC	1	0	0	0	2	0	0	0	0	0	0	0	0	0	0	0	0	0	0	1	0	0	0	0	0	0	0	0	0	0
ENSG00000081248	CACNA1S	10	0	2	3	0	0	0	1	2	2	0	0	0	1	1	4	1	1	0	1	0	1	0	2	2	1	5	1	0	3
ENSG00000081277	PKP1	57	36	19	37	12	21	27	23	23	19	25	41	32	33	18	23	46	19	30	12	85	71	23	32	17	93	58	35	65	9
ENSG00000081307	UBA5	1228	895	1085	1176	942	733	811	847	1319	1253	901	894	940	838	848	793	816	1002	941	1239	1726	1693	1380	1290	1643	1328	1158	997	1298	1890
ENSG00000081320	STK17B	508	427	530	423	342	234	323	405	427	470	314	364	544	347	355	410	453	578	432	528	887	972	774	654	620	742	614	609	599	721
ENSG00000081377	CDC14B	491	348	421	372	340	220	329	296	477	417	321	322	373	373	344	238	223	348	237	295	510	478	398	317	510	389	376	302	336	466
ENSG00000081386	ZNF510	1005	724	856	917	729	560	654	619	1035	1027	656	663	719	677	668	684	677	823	753	965	1308	1258	1088	874	1318	1080	956	797	1051	1281
ENSG00000081479	LRP2	10	3	0	1	0	1	0	4	1	4	2	0	7	1	2	1	2	1	5	5	3	4	1	1	2	2	0	7	4	7
ENSG00000081665	ZNF506	965	684	929	929	724	557	672	682	1144	986	713	685	761	693	630	610	537	700	656	1085	1189	1136	1056	830	1325	880	803	737	836	1297
ENSG00000081692	JMJD4	1879	1357	1187	1565	1130	903	1275	1039	1778	1552	1309	1342	1182	1303	1289	1180	1105	1857	1291	1267	2270	2257	1647	1571	2145	2207	1881	1756	2073	1722
ENSG00000081721	DUSP12	616	419	492	508	422	316	374	353	518	539	358	369	387	422	386	421	377	620	406	582	770	777	591	518	768	688	666	563	705	762
ENSG00000081760	AACS	3415	2607	2491	2982	2253	1697	2509	2106	3559	3257	2553	2478	2491	2562	2449	2162	1925	3174	2283	2847	4163	4056	3690	3083	4742	3858	3316	3182	3547	3818
ENSG00000081791	DELE1	1950	1429	1626	1697	1424	989	1269	1204	1904	1844	1305	1251	1297	1289	1313	1137	996	1659	1121	1679	2014	2060	1855	1566	2701	1884	1647	1679	1868	2116
ENSG00000081800	SLC13A1	2	0	0	0	0	0	0	0	1	1	1	0	2	0	0	0	0	0	0	0	0	1	0	0	0	0	0	0	0	0
ENSG00000081803	CADPS2	753	561	565	679	524	390	506	439	756	743	522	538	569	525	521	656	559	615	563	544	1255	1092	762	689	797	1029	910	549	911	751
ENSG00000081818	PCDHB4	0	0	0	0	0	0	0	0	0	0	0	0	0	0	0	0	0	0	0	0	0	0	0	0	0	0	0	0	0	0
ENSG00000081842	PCDHA6	0	0	0	0	0	0	0	0	0	0	0	0	0	0	0	0	0	0	0	0	0	0	0	0	0	0	0	0	0	0
ENSG00000081853	PCDHGA2	59	68	43	46	38	18	38	47	45	70	36	43	44	39	44	25	26	50	41	69	55	44	68	37	99	53	48	58	43	75
ENSG00000081870	HSPB11	910	640	677	861	647	509	540	577	811	863	606	598	756	592	543	575	675	731	711	1064	1261	1344	881	974	1111	1002	879	694	1049	1340
ENSG00000081913	PHLPP1	1258	900	943	1057	959	615	860	779	1187	1227	876	829	915	943	906	846	794	1057	875	1110	1530	1563	1312	1143	1771	1353	1263	1113	1319	1325
ENSG00000081923	ATP8B1	2496	1880	2230	2222	1956	1400	1712	1763	2546	2774	1771	1833	1982	1854	1859	1725	1563	2024	1755	2293	3232	3056	2546	2150	3310	2738	2375	2050	2623	3133
ENSG00000081985	IL12RB2	3	1	0	0	1	0	0	0	0	0	0	1	0	0	0	0	0	0	0	1	0	0	1	2	0	0	0	0	0	1
ENSG00000082014	SMARCD3	804	575	562	673	540	379	580	455	697	704	494	556	490	519	572	349	374	790	491	833	682	754	838	680	1464	704	656	863	714	1048
ENSG00000082068	WDR70	1301	1054	1122	1171	1008	734	921	879	1349	1416	944	924	1040	937	973	941	773	1275	962	1305	1645	1755	1362	1262	1813	1583	1413	1266	1554	1537
ENSG00000082074	FYB1	1	0	0	0	0	0	0	0	0	0	0	0	0	0	0	0	0	0	0	0	0	0	0	0	0	0	0	0	0	0
ENSG00000082126	MPP4	4	1	3	4	3	2	0	1	2	5	2	1	4	1	1	1	1	2	0	2	3	0	5	0	3	1	2	6	2	1
ENSG00000082146	STRADB	1184	1002	1107	1196	921	708	905	793	1227	1362	857	877	1014	854	937	909	850	1119	1039	1357	1692	1809	1334	1304	1701	1441	1353	1046	1434	1678
ENSG00000082153	BZW1	5696	4300	4694	5292	3844	3266	3746	3270	5457	5534	3880	3928	4500	3933	3641	4305	4047	5005	4677	5866	8228	8398	6187	5719	7155	6673	5835	4491	6416	7921
ENSG00000082175	PGR	8	2	1	8	7	3	4	3	5	9	4	4	4	6	3	2	2	1	6	8	5	3	5	0	17	0	4	2	4	15
ENSG00000082196	C1QTNF3	81	43	85	101	54	36	72	66	118	119	72	46	50	73	53	35	32	56	43	91	82	62	100	57	99	59	42	68	40	145
ENSG00000082212	ME2	1899	1326	1529	1732	1360	1000	1178	1130	1864	1910	1174	1232	1442	1365	1290	1412	1369	1826	1690	2361	2739	2684	2176	1988	3086	2277	2082	1686	2450	2894
ENSG00000082213	C5orf22	1462	1170	1343	1460	1156	881	1044	862	1528	1585	1049	1047	1278	1112	1002	1012	1031	1245	1162	1499	2081	2102	1529	1514	1827	1711	1462	1137	1565	1998
ENSG00000082258	CCNT2	1632	1260	1372	1558	1251	998	1110	1032	1737	1680	1142	1035	1292	1122	1050	1117	1018	1241	1137	1696	2150	2115	1750	1579	2057	1642	1548	1209	1620	2018
ENSG00000082269	FAM135A	453	358	362	464	268	295	321	278	452	402	339	329	325	337	231	305	302	296	315	409	678	641	473	436	448	488	405	316	400	586
ENSG00000082293	COL19A1	9	0	0	0	0	0	0	0	0	0	1	1	0	0	0	0	0	0	0	0	0	0	0	0	0	0	0	0	0	0
ENSG00000082397	EPB41L3	10	7	3	7	6	1	5	6	8	8	9	1	5	0	4	0	8	5	2	11	4	6	8	4	7	12	8	3	8	6
ENSG00000082438	COBLL1	3172	2492	3429	3074	2963	1842	2157	2538	3359	4005	2210	2336	3075	2182	2650	2286	2037	2771	2291	4076	4250	4478	4097	2996	5449	3771	3300	2871	3193	5330
ENSG00000082458	DLG3	3422	2493	2632	3015	2455	1677	2393	2213	3313	3382	2165	2256	2399	2481	2477	2100	1904	2767	2254	3001	4031	4077	3137	3049	4778	3461	3290	2906	3709	3906
ENSG00000082482	KCNK2	3	0	0	0	0	0	0	0	0	0	0	0	0	0	0	0	0	0	0	0	0	0	0	0	0	0	0	0	0	0
ENSG00000082497	SERTAD4	5	3	3	5	1	3	4	0	3	4	2	2	4	5	1	3	2	0	5	2	6	9	2	2	2	2	7	2	1	3
ENSG00000082512	TRAF5	73	42	46	72	46	43	53	49	100	66	76	63	58	57	43	51	64	71	58	76	113	118	95	101	78	99	100	64	100	89
ENSG00000082515	MRPL22	1363	1045	989	1178	867	666	911	805	1308	1171	834	881	995	941	781	965	938	1384	1056	1125	1644	1943	1219	1348	1807	1654	1400	1204	1733	1568
ENSG00000082516	GEMIN5	2165	1672	1615	2037	1401	1118	1538	1220	2210	1894	1569	1480	1436	1540	1455	1791	1544	1649	1834	1535	3144	2991	1966	2271	2252	2825	2522	1709	2694	2028
ENSG00000082556	OPRK1	37	34	63	43	63	25	18	59	58	92	29	35	35	30	53	19	19	59	22	104	49	56	60	42	165	37	24	49	40	114
ENSG00000082641	NFE2L1	6310	5010	4292	5111	3977	3209	4196	4162	7914	6411	5709	5688	6150	5853	5184	4497	4111	6470	4783	4989	9514	8912	8866	6954	11611	7969	6711	6712	7207	8461
ENSG00000082684	SEMA5B	5	0	2	0	3	1	2	0	1	1	0	1	1	0	1	0	1	1	0	0	1	1	1	1	2	0	1	5	0	1
ENSG00000082701	GSK3B	5318	4099	4718	4991	4488	2928	3815	3631	5454	6020	3760	3760	4452	4016	4264	3328	3056	4127	3564	5633	6531	6323	5784	4728	7804	5238	4765	4514	5228	7489
ENSG00000082781	ITGB5	1730	1264	1273	1401	1200	838	1222	1057	1621	1618	1193	1214	1219	1273	1295	1023	860	1449	983	1316	1883	1910	1603	1339	2239	1616	1498	1555	1665	1741
ENSG00000082805	ERC1	2508	1866	1660	2149	1750	1188	1632	1492	2873	2497	1922	1853	1874	2026	1881	1485	1277	1814	1538	1794	2897	2710	2423	2101	3263	2482	2236	1961	2319	2496
ENSG00000082898	XPO1	6859	5322	6380	6633	5461	4155	4703	4546	7588	7057	5201	5224	6289	4914	4630	6217	6094	6399	6879	7887	13670	12696	9037	9540	8529	9211	8354	5738	8849	10680
ENSG00000082929	LINC01587	2	0	0	2	0	0	0	0	0	1	1	0	1	1	0	0	0	0	0	0	0	0	0	0	2	1	0	0	0	0
ENSG00000082996	RNF13	1060	765	1019	953	837	542	700	685	1071	1188	788	809	913	711	758	783	783	1017	933	1153	1640	1671	1235	1196	1319	1191	1182	858	1240	1523
ENSG00000083067	TRPM3	12	0	0	0	1	0	1	3	0	0	0	1	1	0	0	0	1	0	0	2	0	0	0	1	2	0	0	0	2	1
ENSG00000083093	PALB2	950	685	776	918	683	495	632	595	979	1042	570	670	683	668	624	749	660	789	817	769	1303	1446	1017	947	1145	1187	1172	778	1190	1000
ENSG00000083097	DOP1A	936	731	980	909	802	555	629	704	990	1109	629	671	779	663	741	597	592	644	671	1040	1212	1212	1083	868	1223	973	908	782	924	1221
ENSG00000083099	LYRM2	568	412	479	522	455	302	388	303	513	596	370	387	421	424	401	405	399	497	415	579	779	867	542	605	739	615	616	404	649	795
ENSG00000083123	BCKDHB	514	409	444	404	369	325	359	319	507	515	418	332	412	419	356	337	276	475	400	634	642	637	571	473	768	564	505	485	512	716
ENSG00000083168	KAT6A	4687	3421	3333	3984	3061	2429	3242	2975	5186	4349	3482	3514	3717	3784	3192	3308	2916	3421	3383	3070	6527	6139	4852	4302	5480	5792	4945	3527	4813	4616
ENSG00000083223	TUT7	2412	1963	1777	2158	1448	1406	1690	1360	2386	2112	1685	1800	1780	1659	1464	1671	1439	1560	1423	1772	2941	3100	2210	1973	2526	2640	2275	1577	2127	2552
ENSG00000083290	ULK2	1217	911	994	1103	979	637	810	734	1128	1204	825	805	885	796	853	727	673	943	790	1045	1400	1493	1151	1010	1366	1205	1140	991	1207	1336
ENSG00000083307	GRHL2	8551	6071	5831	6926	5052	4259	5675	4516	7530	7134	5669	5343	5154	5448	5044	5232	4420	5723	5080	5919	9247	9324	7044	6566	8942	9078	7460	6102	7840	7265
ENSG00000083312	TNPO1	6675	5088	6453	6577	5352	3854	4587	4324	6795	7129	4911	4740	5826	4774	4650	5494	5059	5402	5914	7334	10767	10680	7723	7563	8237	8195	7433	5134	7985	9568
ENSG00000083444	PLOD1	4804	3328	3159	3811	2948	2266	3335	2602	4259	4192	3084	3086	2950	3180	3204	3128	2811	4107	3165	3523	5623	5598	4298	3992	5938	5283	4740	4230	5071	4185
ENSG00000083454	P2RX5	99	83	79	74	40	63	85	50	110	78	61	61	60	89	77	78	59	66	67	73	140	138	104	79	113	115	84	101	115	92
ENSG00000083457	ITGAE	800	591	637	765	537	463	587	454	774	733	563	587	610	597	527	565	573	866	666	758	1137	1215	783	809	1126	1025	974	705	982	942
ENSG00000083520	DIS3	529	396	516	530	463	337	381	343	608	594	398	405	471	417	348	438	416	471	547	582	897	1023	708	659	677	695	633	407	698	814
ENSG00000083535	PIBF1	77	59	78	96	77	61	69	58	117	109	93	68	73	70	66	59	52	71	92	101	182	175	106	119	140	116	125	84	121	145
ENSG00000083544	TDRD3	1040	812	860	902	759	544	729	712	1025	1000	655	676	876	732	704	693	657	788	771	1051	1287	1417	958	981	1340	1142	1079	852	1123	1243
ENSG00000083622	AC000061.1	0	0	0	0	0	0	0	0	0	0	0	0	0	0	0	1	0	0	0	0	0	0	0	0	0	0	0	0	0	0
ENSG00000083635	NUFIP1	540	408	341	504	372	308	379	338	511	488	387	424	389	388	349	425	443	454	448	497	844	822	515	562	686	711	630	455	680	641
ENSG00000083642	PDS5B	3776	2998	3502	3497	2569	2174	2729	2345	4024	3583	2712	2685	3113	2601	2228	2934	2839	3029	3176	3512	6009	5995	4413	4057	4132	4670	4162	2868	4259	4706
ENSG00000083720	OXCT1	5245	3813	4396	4543	3546	2779	3519	3257	4970	5185	3455	3520	3900	3672	3504	4296	3789	4753	4443	4940	8051	8314	5564	5622	6916	6993	6327	4952	6684	6569
ENSG00000083750	RRAGB	355	310	304	323	274	190	233	272	375	381	250	236	323	248	275	209	222	326	249	311	440	393	338	316	504	353	361	307	340	406
ENSG00000083782	EPYC	0	0	0	0	0	0	0	0	0	0	0	0	0	0	0	0	0	0	0	0	0	0	0	0	0	0	0	0	0	0
ENSG00000083799	CYLD	1157	849	1004	1041	830	637	785	774	1179	1172	744	737	922	828	848	738	661	860	728	1178	1451	1433	1175	997	1480	1172	1033	956	1100	1505
ENSG00000083807	SLC27A5	752	585	524	603	467	357	517	466	765	525	544	529	559	557	455	493	518	764	473	645	861	957	637	725	977	932	844	723	796	650
ENSG00000083812	ZNF324	386	285	244	319	225	165	262	234	414	347	295	289	284	277	264	215	233	331	274	233	448	444	368	328	471	470	396	324	406	400
ENSG00000083814	ZNF671	385	290	247	274	245	191	280	253	363	305	264	242	269	272	253	185	168	311	165	273	369	363	346	234	452	336	310	284	315	375
ENSG00000083817	ZNF416	517	371	462	458	347	298	407	360	504	514	320	377	378	389	352	352	319	484	371	428	662	641	484	488	640	573	517	410	568	516
ENSG00000083828	ZNF586	904	710	754	830	635	561	632	610	991	786	698	669	681	678	564	710	621	815	683	817	1381	1253	895	957	1224	1111	1057	752	1081	1000
ENSG00000083838	ZNF446	512	380	399	431	350	222	385	309	504	524	336	349	355	342	369	304	276	492	363	492	535	552	475	391	801	612	547	461	539	604
ENSG00000083844	ZNF264	1778	1337	1391	1613	1377	874	1258	1119	1856	1819	1207	1166	1260	1279	1206	1028	956	1151	1035	1511	1971	1853	1467	1451	2184	1635	1446	1389	1598	1891
ENSG00000083845	RPS5	27334	19537	21738	21936	17741	14496	19645	17247	24138	24593	17367	18811	19693	18967	19197	16694	16333	29789	18449	23200	29100	32945	22815	22895	36411	31118	28240	26191	30502	28310
ENSG00000083857	FAT1	8186	6012	5890	6729	5086	4129	5292	4720	7784	6972	5565	5258	5398	5484	4902	4835	4022	4783	4577	4852	8541	8310	6664	5674	7286	7442	6438	5187	6047	5735
ENSG00000083896	YTHDC1	1232	944	953	1080	818	679	815	813	1617	1202	1066	1008	1222	1249	1009	986	791	1043	965	813	2011	2055	1582	1406	1846	1761	1389	1202	1601	1458
ENSG00000083937	CHMP2B	1033	674	805	868	691	546	615	617	914	990	641	660	802	682	665	716	679	836	823	1112	1357	1461	1009	1083	1247	1088	1001	722	1155	1474
ENSG00000084070	SMAP2	2755	2075	2009	2448	1983	1375	1938	1522	2559	2860	1773	1844	1841	1957	2093	1730	1542	2260	1815	2338	3138	3161	2703	2355	3506	2773	2626	2359	2900	2779
ENSG00000084072	PPIE	1623	1188	1311	1298	1099	827	1083	981	1367	1443	985	998	1210	1004	1035	1041	959	1519	1227	1408	1911	2050	1380	1522	2187	1904	1756	1522	1934	1857
ENSG00000084073	ZMPSTE24	2811	2222	2556	2830	2164	1581	2009	1898	2943	3066	2041	2058	2451	2166	2192	2065	1947	2554	2544	3461	4432	4348	3308	3195	3885	3083	2843	2260	3235	4489
ENSG00000084090	STARD7	9297	6896	6656	8396	6330	4836	6402	5254	8712	8629	6257	6287	6369	6588	6040	6834	6162	7341	7166	6918	12846	13075	8559	9507	9809	10896	9904	7303	10848	8990
ENSG00000084092	NOA1	2386	1738	1944	2024	1649	1211	1574	1438	2084	2227	1574	1516	1733	1555	1565	1726	1583	2376	1972	2239	3329	3325	2562	2463	3329	2914	2638	2284	2907	2788
ENSG00000084093	REST	2982	2259	2567	2807	2277	1683	2180	1882	3036	3109	2047	2096	2262	2219	2174	2083	1768	2231	2168	3227	3800	3932	3226	2827	4195	3192	3043	2454	3099	4153
ENSG00000084110	HAL	5	6	4	3	3	2	1	4	13	3	4	2	4	7	2	0	3	1	1	8	5	4	0	2	1	4	4	0	12	8
ENSG00000084112	SSH1	2214	1648	1695	2010	1527	1139	1512	1388	2168	2208	1521	1537	1552	1684	1511	1379	1205	1497	1504	1680	2579	2493	2029	1918	2529	2284	2046	1738	2019	2034
ENSG00000084207	GSTP1	0	0	0	0	0	0	1	0	0	0	0	1	0	1	0	0	0	0	1	0	0	1	1	0	1	0	0	1	3	0
ENSG00000084234	APLP2	12704	9391	9316	10815	8035	6186	8835	8083	12358	11795	9098	9250	9923	9917	9010	8471	7362	11215	8437	8651	16176	15605	12801	11343	16185	14140	12771	11303	13188	12574
ENSG00000084444	FAM234B	2682	2009	2260	2332	2020	1389	1877	1853	2645	2833	1865	1811	2129	1948	1878	1978	1798	2580	2083	2853	3750	3570	2961	2726	4159	2964	2845	2595	3186	3732
ENSG00000084453	SLCO1A2	0	0	0	1	0	0	0	0	2	0	0	0	0	0	0	0	0	0	0	1	0	0	0	0	2	0	0	0	0	1
ENSG00000084463	WBP11	3759	2877	2831	3330	2502	1737	2591	2038	3560	3750	2540	2472	2554	2762	2441	3104	2601	2996	3307	3177	5594	5460	3547	4268	4726	5164	4409	3006	4739	4069
ENSG00000084623	EIF3I	12065	8756	9146	10131	7567	6202	8423	7242	10573	11152	7969	8422	8525	8923	8402	8041	6884	11028	8284	8768	13957	15151	10100	10444	13465	13977	12573	10328	13414	10819
ENSG00000084628	NKAIN1	16	11	9	9	5	8	12	5	8	8	9	5	7	9	5	5	7	9	5	11	13	20	14	10	14	8	16	8	6	15
ENSG00000084636	COL16A1	69	37	55	34	43	30	28	42	75	62	30	28	71	61	50	17	10	75	23	97	26	27	116	30	205	29	32	95	30	165
ENSG00000084652	TXLNA	5644	4290	3521	4554	3243	2788	3897	3169	6120	4828	4521	4442	4231	4617	3972	4082	3514	4837	4260	3652	7905	7401	5746	5890	7335	6853	5895	4791	6542	5744
ENSG00000084674	APOB	2	0	0	1	0	0	0	0	0	0	0	0	0	0	0	0	0	0	0	0	0	2	0	0	0	0	0	0	0	0
ENSG00000084676	NCOA1	4440	3337	3752	4026	3323	2263	3221	3030	4495	4585	3194	3037	3437	3243	3229	3221	2754	3524	3274	3915	5898	5697	4896	4150	6087	5187	4508	3830	4828	5155
ENSG00000084693	AGBL5	1419	975	1078	1152	969	683	987	921	1245	1289	878	860	930	945	984	750	732	1164	843	1269	1380	1404	1203	1018	1903	1379	1237	1310	1402	1483
ENSG00000084710	EFR3B	189	142	136	160	114	81	144	114	179	215	134	114	126	109	114	77	74	126	88	129	116	160	147	126	258	108	87	111	116	172
ENSG00000084731	KIF3C	364	261	224	303	223	159	224	227	466	380	299	257	338	329	291	173	192	343	201	239	360	321	454	290	668	347	320	308	305	469
ENSG00000084733	RAB10	4729	3545	3757	4324	3577	2543	3174	2758	4729	4560	3196	3339	3484	3315	3256	3223	3196	4664	3942	5309	6755	6433	5051	5162	6705	5307	4920	4186	5459	6893
ENSG00000084734	GCKR	7	5	3	7	3	5	5	4	5	2	5	1	3	8	2	1	2	5	3	5	2	5	6	7	11	6	0	5	8	9
ENSG00000084754	HADHA	7120	5295	5736	6355	5068	3780	5002	4674	6704	7384	4800	4823	5548	5289	5226	4533	4160	6850	5188	6867	8054	8666	7112	6189	10899	7782	7204	6660	7797	8725
ENSG00000084764	MAPRE3	710	559	569	579	459	342	540	454	667	601	464	471	499	460	503	365	331	594	409	575	643	718	626	472	926	580	499	509	606	686
ENSG00000084774	CAD	5674	4130	3629	4706	3376	2717	3812	3216	5497	4923	3920	3815	3744	4137	3636	4128	3609	4142	4105	3398	7344	7167	5169	5519	5770	7131	6112	4646	6523	4257
ENSG00000085063	CD59	1808	1356	1573	1615	1293	950	1348	1160	1674	1892	1171	1259	1408	1266	1246	1105	1023	1637	1253	1917	2021	2039	1738	1511	2655	1673	1668	1656	1824	2177
ENSG00000085117	CD82	214	135	132	151	129	99	146	117	253	204	152	173	169	174	186	101	107	181	123	150	206	193	210	158	314	169	153	201	181	189
ENSG00000085185	BCORL1	674	477	501	570	448	307	508	413	717	705	521	460	519	584	478	413	323	460	391	492	579	687	644	510	848	601	551	453	600	607
ENSG00000085224	ATRX	2032	1631	1702	1857	1490	1191	1356	1446	2540	2152	1693	1686	2193	1710	1485	1224	1135	1605	1365	1712	2390	2626	2723	1767	2789	2057	1949	1749	1892	2752
ENSG00000085231	AK6	936	767	826	953	661	543	696	586	955	873	669	674	726	673	679	772	689	956	844	1017	1471	1573	1051	1116	1354	1306	1131	842	1257	1281
ENSG00000085265	FCN1	1	0	0	0	0	0	0	0	0	0	0	0	0	0	0	0	0	0	0	0	0	0	0	0	0	0	0	0	0	0
ENSG00000085274	MYNN	1612	1265	1599	1736	1338	975	1110	1158	1715	1924	1159	1088	1376	1103	1213	1042	998	1299	1266	2045	2012	1984	1639	1667	2417	1567	1483	1270	1765	2876
ENSG00000085276	MECOM	42	27	26	41	22	24	27	25	43	55	36	17	29	29	27	13	11	22	24	59	19	36	50	29	77	38	47	25	33	55
ENSG00000085365	SCAMP1	2069	1575	1906	1858	1651	1184	1449	1316	2087	2288	1513	1464	1830	1466	1471	1548	1552	1847	1778	2377	3288	3293	2382	2358	2671	2355	2175	1642	2402	3064
ENSG00000085377	PREP	1421	1067	1041	1306	974	692	945	828	1374	1406	898	963	1084	984	1014	987	899	1109	1111	1246	1847	1845	1454	1365	1704	1663	1479	1136	1614	1535
ENSG00000085382	HACE1	338	286	328	397	275	213	249	252	339	400	253	255	347	257	243	263	263	293	283	382	532	584	421	334	504	467	361	350	387	540
ENSG00000085415	SEH1L	3691	2590	2882	3356	2689	1965	2516	2237	3649	3681	2487	2608	2842	2676	2548	2591	2366	3097	3004	3177	4980	4995	3609	3656	4364	4055	3738	3130	4221	4071
ENSG00000085433	WDR47	637	528	500	536	488	361	368	408	539	601	432	397	492	481	407	402	437	506	451	552	773	837	572	585	790	623	591	407	666	727
ENSG00000085449	WDFY1	1499	1152	1267	1439	1167	908	1076	962	1541	1424	1088	1010	1186	1137	1080	1094	974	1301	1083	1544	2165	2088	1650	1541	2010	1778	1589	1257	1646	1964
ENSG00000085465	OVGP1	353	274	279	256	289	190	241	228	339	363	254	231	203	276	270	264	221	294	264	302	458	503	346	349	453	503	395	362	384	353
ENSG00000085491	SLC25A24	678	469	608	622	505	360	464	433	613	667	456	466	540	464	438	486	435	522	500	657	809	813	652	590	863	702	638	505	648	895
ENSG00000085511	MAP3K4	2032	1415	1567	1951	1378	1069	1367	1293	2123	1919	1393	1386	1433	1434	1408	1576	1263	1394	1484	1444	2660	2824	1803	1940	2209	2506	2197	1457	2280	1943
ENSG00000085514	PILRA	38	19	21	26	26	7	18	21	39	31	29	25	20	24	11	20	9	10	17	16	32	22	29	14	30	15	24	15	26	14
ENSG00000085552	IGSF9	1082	803	777	904	754	552	734	654	1226	998	764	689	695	799	734	588	546	783	718	784	1106	1173	996	858	1447	1121	986	925	995	976
ENSG00000085563	ABCB1	1	0	0	0	0	0	1	0	0	0	0	0	0	0	0	0	0	0	0	0	0	0	0	0	2	0	0	0	0	2
ENSG00000085644	ZNF213	762	549	583	596	537	348	597	522	749	839	560	536	557	537	650	473	454	683	499	620	932	897	818	732	1334	784	729	772	877	905
ENSG00000085662	AKR1B1	8	7	1	6	2	0	2	2	2	4	7	2	2	4	0	2	0	2	0	0	5	6	2	1	5	5	0	2	1	5
ENSG00000085719	CPNE3	18769	14671	17248	17829	14298	10620	13344	12148	19214	20482	13215	13330	15796	13653	13409	12311	12299	17733	15329	21626	25166	26206	21501	19386	26315	18687	18938	15894	21577	28301
ENSG00000085721	RRN3	2808	1959	2240	2572	1989	1530	1839	1722	2809	2779	1954	1949	2237	2127	1907	1972	1911	2429	2298	2596	3950	3991	2821	2805	3548	3266	2855	2399	3354	3560
ENSG00000085733	CTTN	6057	4528	4053	4831	3549	3121	4224	3870	6667	5419	4933	4919	4974	5165	4547	3604	3111	4559	3645	3145	7104	6874	5871	4767	7114	6538	5476	4893	5769	5297
ENSG00000085741	WNT11	2	0	2	1	0	1	1	4	0	0	1	2	3	1	0	0	0	0	0	0	0	2	1	0	2	0	0	0	2	0
ENSG00000085760	MTIF2	1289	960	1057	1143	892	659	869	829	1300	1284	888	880	1111	916	867	1103	948	1051	1062	1158	1958	1915	1343	1363	1623	1595	1484	1025	1603	1648
ENSG00000085788	DDHD2	1627	1259	1462	1541	1201	912	1134	1125	1724	1567	1211	1183	1373	1149	1141	1087	1004	1201	1031	1480	1961	2115	1665	1397	1836	1608	1483	1181	1635	1794
ENSG00000085831	TTC39A	356	250	320	327	282	195	263	258	350	375	321	262	301	237	265	189	155	333	201	320	329	325	335	260	497	321	297	384	269	448
ENSG00000085832	EPS15	3465	2775	3440	3231	2668	1887	2465	2327	3438	3785	2480	2476	3195	2501	2605	2520	2292	3253	2605	3936	4690	4989	4084	3246	5224	3965	3702	3014	3847	5297
ENSG00000085840	ORC1	1571	1162	1030	1278	1037	728	1016	795	1397	1334	1017	1037	856	1093	936	1338	1204	1321	1307	982	2316	2330	1463	1611	1387	2223	1946	1280	2041	1180
ENSG00000085871	MGST2	2339	1720	1777	1977	1516	1211	1547	1282	2259	1987	1470	1560	1513	1716	1482	1475	1430	2154	1692	2102	2713	2918	1920	2025	2930	2510	2386	1782	2501	2613
ENSG00000085872	CHERP	3428	2611	2370	2840	2088	1740	2312	1880	3399	3314	2597	2428	2155	2670	2391	2739	2280	2621	2821	2542	4748	4536	3443	3464	4269	4662	4044	2934	4227	2930
ENSG00000085978	ATG16L1	1207	839	994	1073	877	615	837	774	1159	1107	769	770	897	850	831	787	663	975	782	976	1375	1515	1130	1018	1565	1279	1213	1046	1242	1299
ENSG00000085982	USP40	2280	1732	2020	2150	1899	1363	1554	1620	2368	2589	1571	1525	1803	1723	1734	1597	1450	2222	1692	2623	3202	3092	2794	2239	3805	2573	2344	2268	2537	3459
ENSG00000085998	POMGNT1	5110	3834	3593	4314	3401	2547	3647	3023	4730	4827	3347	3459	3428	3736	3549	2733	2385	4360	3026	3776	4977	5346	4268	3833	6293	4800	4454	4373	4925	4832
ENSG00000085999	RAD54L	1820	1243	1185	1398	1113	885	1303	981	1709	1574	1215	1171	1032	1244	1043	1489	1298	1294	1480	1007	2629	2523	1635	1772	1595	2495	2085	1418	2318	1215
ENSG00000086015	MAST2	1650	1233	1224	1433	1151	834	1220	1019	1658	1577	1233	1106	1169	1215	1186	1138	993	1259	1167	1194	2060	1991	1664	1495	1893	2066	1814	1496	1759	1553
ENSG00000086061	DNAJA1	12547	8788	7445	10601	6960	6568	8461	5994	11854	10025	7959	8567	7184	8628	6836	8120	7444	9786	8839	8409	15338	15826	9798	10640	12699	14133	12463	9049	14061	11091
ENSG00000086062	B4GALT1	4919	3877	4346	4400	3875	2535	3482	3289	4900	5420	3557	3545	3853	3498	3891	3486	3174	4753	3546	6025	6418	6300	5892	4739	8402	5722	4888	4851	5293	6906
ENSG00000086065	CHMP5	1520	1154	1387	1365	1015	818	1024	1016	1488	1573	989	959	1218	1134	1052	1097	1011	1624	1173	1709	1930	2098	1533	1398	2541	1827	1680	1402	1915	2232
ENSG00000086102	NFX1	4237	3034	3266	3460	2782	2052	2886	2621	4153	3908	2724	2725	3046	2940	2734	2948	2463	3360	2924	3315	5188	5123	4022	3755	4979	4871	4190	3398	4299	4249
ENSG00000086159	AQP6	4	0	0	1	2	1	0	1	3	1	0	1	0	0	0	2	0	2	1	2	0	1	1	0	7	1	2	3	0	6
ENSG00000086189	DIMT1	1366	1089	1087	1293	971	704	980	861	1396	1289	927	1004	1021	1015	932	977	954	1189	1211	1258	2063	2011	1223	1450	1454	1643	1420	1059	1675	1674
ENSG00000086200	IPO11	1533	1115	1208	1368	1067	824	1030	922	1549	1535	1080	1079	1149	1014	966	1348	1216	1285	1505	1556	2749	2695	1627	1857	1861	2175	1912	1233	2175	1998
ENSG00000086205	FOLH1	29483	22526	26905	27699	23407	16585	20847	20358	30200	32527	20001	20265	23688	21271	21906	17416	16586	29346	20189	36210	33319	35886	33534	26668	49692	28510	27548	28627	30884	47377
ENSG00000086232	EIF2AK1	7191	5274	6062	6332	5186	3670	4944	4746	6738	7333	4843	4856	5693	5222	5173	4807	4295	6833	5098	7460	8996	9249	7695	6532	10410	7663	7340	6620	7928	8573
ENSG00000086288	NME8	2	0	0	0	0	0	0	0	0	0	0	0	0	0	0	0	0	0	0	0	0	0	0	0	0	0	0	0	0	0
ENSG00000086289	EPDR1	118	113	102	112	70	55	83	66	115	73	79	84	86	94	82	71	76	74	66	81	125	148	111	96	105	134	90	85	119	87
ENSG00000086300	SNX10	262	211	239	236	211	162	207	186	256	295	183	211	220	178	148	155	160	232	207	252	346	365	272	221	312	264	221	207	260	363
ENSG00000086475	SEPHS1	3599	2678	2740	3081	2416	1811	2483	2097	3261	3428	2539	2503	2555	2509	2389	2409	2014	3089	2501	2987	4240	4391	3239	3167	4454	3801	3552	2923	3954	3731
ENSG00000086504	MRPL28	1747	1308	1155	1430	1136	833	1254	936	1523	1435	1171	1105	1057	1247	1157	1044	956	1839	1216	1457	1894	2114	1429	1525	2342	1963	1736	1616	2010	1819
ENSG00000086506	HBQ1	18	13	10	15	11	7	12	14	17	15	14	10	11	16	7	2	9	22	4	7	14	22	11	12	20	16	10	13	10	10
ENSG00000086544	ITPKC	514	328	348	438	335	246	325	317	496	499	416	396	405	443	397	350	282	458	343	328	605	595	569	456	750	615	484	470	512	492
ENSG00000086548	CEACAM6	0	0	0	3	1	0	0	0	0	0	0	0	0	0	0	0	0	0	0	0	0	0	0	0	0	0	0	0	0	0
ENSG00000086570	FAT2	11	7	4	9	6	3	4	7	6	5	3	5	1	7	4	2	3	12	4	5	7	4	3	7	4	7	3	2	14	8
ENSG00000086589	RBM22	1955	1429	1555	1766	1234	1020	1411	1155	1818	1861	1269	1316	1275	1396	1254	1267	1183	1653	1466	1517	2461	2439	1817	1815	2288	2082	1932	1573	2110	2025
ENSG00000086598	TMED2	8651	6363	7292	8029	6125	4932	6026	5089	8602	8494	5951	6246	7010	6205	6124	7012	6507	8815	7514	9810	14172	13688	9678	10335	11541	10545	9805	7352	10784	12424
ENSG00000086619	ERO1B	153	120	139	168	148	99	112	118	178	180	141	111	156	126	111	86	110	144	116	208	231	189	201	161	251	141	138	152	154	288
ENSG00000086666	ZFAND6	1152	934	1160	1122	950	699	831	834	1175	1208	789	864	984	793	816	781	663	1099	837	1295	1445	1525	1214	1119	1678	1226	1089	974	1223	1671
ENSG00000086696	HSD17B2	1	0	5	0	0	1	1	0	2	1	1	1	1	0	1	1	1	0	0	0	1	3	0	0	3	1	2	2	4	0
ENSG00000086712	TXLNG	1155	857	856	1014	797	597	840	644	1161	1085	782	762	762	832	656	847	815	880	966	918	1673	1660	1179	1137	1199	1362	1225	808	1338	1314
ENSG00000086717	PPEF1	18	15	21	14	17	5	23	27	27	24	10	13	22	16	19	13	8	21	5	20	27	23	29	10	25	16	10	17	20	31
ENSG00000086730	LAT2	30	21	14	19	13	9	23	14	25	20	29	17	21	16	15	22	24	13	15	3	45	37	16	33	13	43	17	14	32	10
ENSG00000086758	HUWE1	20585	15371	15784	17301	14003	10349	13362	12742	21449	20197	15350	14498	16258	16523	15021	15121	12944	16099	15048	16102	27607	26175	23798	20210	27652	23981	20761	17929	21510	21529
ENSG00000086827	ZW10	1292	996	1078	1248	972	715	947	769	1441	1271	872	945	1013	938	873	1141	1013	1119	1220	1207	2129	2174	1378	1532	1592	1836	1566	1052	1680	1618
ENSG00000086848	ALG9	0	0	0	0	0	0	0	0	0	0	0	0	0	0	0	0	0	0	0	0	0	0	0	0	0	0	0	0	0	0
ENSG00000086967	MYBPC2	4	1	0	0	1	0	1	0	0	4	0	0	0	3	0	0	0	1	0	0	0	0	0	0	0	0	0	0	0	0
ENSG00000086991	NOX4	3	0	1	1	0	1	0	0	0	0	0	0	0	0	0	0	0	0	0	0	0	0	0	0	0	0	0	0	0	0
ENSG00000087008	ACOX3	935	761	762	798	621	475	638	631	942	810	649	626	663	694	576	522	494	736	618	703	1000	1013	975	744	1079	1032	878	824	855	903
ENSG00000087053	MTMR2	2238	1854	2088	2153	1697	1263	1634	1490	2202	2430	1501	1680	1945	1715	1605	1899	1629	2060	1910	2260	3455	3462	2491	2259	2984	2869	2453	1928	2705	2915
ENSG00000087074	PPP1R15A	124	93	75	93	72	41	77	81	110	132	85	90	122	94	104	63	56	118	68	110	127	163	127	101	211	123	83	145	121	166
ENSG00000087076	HSD17B14	41	14	25	26	22	17	18	30	28	33	30	18	37	19	28	9	20	32	12	38	21	29	35	19	61	8	21	42	30	42
ENSG00000087077	TRIP6	64	46	28	31	29	26	31	34	57	47	49	39	41	39	34	28	20	43	24	30	46	32	39	36	54	56	43	37	38	29
ENSG00000087085	ACHE	18	15	16	19	14	10	14	14	29	27	12	12	21	14	13	12	5	14	14	18	17	31	19	14	45	25	25	12	24	23
ENSG00000087086	FTL	8782	6041	6369	7033	5655	4225	6024	5453	7592	7984	5070	5756	5892	5503	6047	3860	3753	8441	4533	6940	6914	7745	6653	5585	11359	7214	6862	7650	7424	8167
ENSG00000087087	SRRT	3944	2927	2362	3006	2197	1887	2813	2289	4987	3495	3709	3589	3438	4000	2966	2990	2766	3327	3188	1970	6451	6171	4542	4592	5110	5702	4683	3509	4916	3405
ENSG00000087088	BAX	1183	813	747	934	729	567	799	591	1119	951	730	713	679	766	683	722	652	1020	775	797	1282	1312	888	870	1095	1244	1102	861	1252	903
ENSG00000087095	NLK	1063	731	858	967	758	565	750	642	991	1048	722	684	790	720	731	671	667	899	712	1102	1347	1284	1108	955	1345	1129	921	917	1097	1318
ENSG00000087111	PIGS	3733	2640	2606	3172	2323	1778	2614	2113	3591	3624	2567	2411	2462	2682	2476	2443	2257	3124	2612	2850	4399	4490	3357	3202	4361	4395	3809	3252	4166	3494
ENSG00000087116	ADAMTS2	5	3	2	0	1	1	1	3	4	3	0	2	1	0	0	0	2	2	0	0	0	0	0	0	1	0	1	2	2	2
ENSG00000087128	TMPRSS11E	43	26	39	35	27	16	20	21	33	41	26	27	31	20	26	25	16	24	24	27	56	57	33	27	37	37	32	26	43	44
ENSG00000087152	ATXN7L3	1344	1019	1010	1077	963	680	943	803	1385	1239	941	1016	1023	1057	983	813	701	1089	769	1063	1594	1510	1206	1187	1772	1388	1162	1155	1414	1256
ENSG00000087157	PGS1	607	441	424	596	408	319	414	369	630	554	418	408	452	474	455	370	344	500	440	502	681	725	590	514	798	707	596	501	633	602
ENSG00000087191	PSMC5	5575	3979	4038	4781	3487	2775	3856	3410	5357	5086	3820	3899	4013	4275	3665	3435	3188	4785	3691	3795	6392	6783	4839	4522	6807	6327	5483	4700	5915	4955
ENSG00000087206	UIMC1	1431	972	1069	1249	891	717	933	911	1435	1205	949	978	1044	1030	949	1015	860	1070	1064	1027	1820	1949	1317	1235	1711	1777	1565	1349	1643	1320
ENSG00000087237	CETP	1	0	3	0	0	0	0	0	2	0	0	0	0	0	1	0	0	0	0	0	0	0	2	0	0	1	1	0	0	0
ENSG00000087245	MMP2	3	0	0	0	0	0	0	0	0	0	0	0	0	0	2	0	0	0	0	0	0	0	0	1	0	0	0	0	0	0
ENSG00000087250	MT3	6	3	4	2	0	0	0	1	3	0	1	2	5	0	1	0	1	2	4	5	3	8	5	3	4	2	1	2	2	1
ENSG00000087253	LPCAT2	106	64	89	106	71	55	64	49	98	96	64	70	66	77	64	58	68	82	75	125	123	113	95	105	102	90	95	69	109	138
ENSG00000087258	GNAO1	34	11	7	7	4	14	9	9	24	16	13	5	11	10	20	14	15	12	14	20	17	22	26	13	23	19	13	18	13	31
ENSG00000087263	OGFOD1	2271	1696	1708	2010	1516	1283	1591	1404	2183	2186	1566	1659	1627	1600	1492	1716	1595	2309	1825	2113	3251	3318	2380	2259	3006	2894	2771	2048	2741	2659
ENSG00000087266	SH3BP2	2890	2327	2299	2537	2041	1461	2045	1813	3207	2834	2122	1975	2145	2214	2058	2043	1808	2552	2163	2767	3787	3601	3193	2893	4434	3599	3079	2828	3371	3290
ENSG00000087269	NOP14	4192	3172	2784	3550	2503	2078	3016	2628	4595	3640	3457	3377	3492	3707	2929	3486	3054	3627	3536	2240	6716	6365	4250	4790	4625	5738	5105	3680	5522	3635
ENSG00000087274	ADD1	6888	5117	5225	5907	4719	3440	4868	4205	6638	6636	4723	4587	4905	5170	5136	4546	3647	5653	4684	5997	7813	8000	6644	6051	9490	7366	6593	5940	7152	7349
ENSG00000087299	L2HGDH	1199	962	1069	1137	917	684	884	802	1205	1195	844	836	930	900	870	893	817	1062	999	1065	1630	1817	1327	1274	1536	1514	1326	1116	1404	1378
ENSG00000087301	TXNDC16	677	491	613	702	561	427	433	506	718	782	464	506	603	439	473	532	543	504	520	769	1030	1044	835	703	767	780	669	497	771	938
ENSG00000087302	RTRAF	2907	2221	2510	2591	2074	1676	1990	1804	2718	2949	1905	2057	2273	2124	2050	2134	2070	2813	2475	2788	4091	4111	2840	2888	3863	3826	3328	2481	3660	3626
ENSG00000087303	NID2	3	0	0	0	0	0	0	1	0	1	0	0	0	0	0	0	1	0	0	1	0	0	0	0	2	0	1	0	1	0
ENSG00000087338	GMCL1	655	475	520	672	461	398	423	400	691	640	486	434	511	494	475	481	474	587	503	673	1045	986	736	750	876	848	703	582	763	927
ENSG00000087365	SF3B2	10509	7608	6873	8593	6365	4831	7241	5901	9870	9650	7550	7510	7205	7847	7188	7765	6634	8922	7874	6860	14098	13767	10106	10384	13366	13280	11752	9462	12698	10131
ENSG00000087448	KLHL42	2439	1858	2081	2213	1828	1361	1669	1645	2528	2502	1645	1665	1874	1826	1696	1607	1495	1971	1616	2704	2956	2944	2626	2220	3589	2519	2150	2105	2447	3407
ENSG00000087460	GNAS	26676	19026	20692	22593	18039	13067	18054	16477	23701	26334	17249	17594	19083	18862	19159	15630	13777	21916	16611	22995	28366	28559	24605	21104	35862	26076	24312	23042	26083	28184
ENSG00000087470	DNM1L	3485	2677	2691	3143	2215	1988	2356	2059	3329	2948	2491	2472	2486	2356	2022	2681	2414	2340	2701	2834	5155	5103	3276	3309	3450	4327	3601	2339	3459	3701
ENSG00000087494	PTHLH	7	4	5	1	3	6	2	2	1	4	2	0	2	7	9	2	3	6	5	16	6	3	14	6	17	2	3	1	8	15
ENSG00000087495	PHACTR3	1	0	0	0	0	0	0	0	0	0	0	0	0	0	0	1	0	0	0	0	0	1	0	0	0	0	0	1	0	0
ENSG00000087502	ERGIC2	1433	1060	1268	1306	1044	852	958	835	1447	1433	982	996	1156	939	893	1263	1226	1222	1351	1490	2417	2423	1592	1763	1608	1899	1690	1118	1683	2078
ENSG00000087510	TFAP2C	992	696	666	928	637	507	698	531	928	923	639	681	644	757	668	688	600	814	681	901	1262	1285	927	986	1218	1160	1017	848	1117	1023
ENSG00000087586	AURKA	2197	1666	1534	1884	1351	1120	1598	1166	2095	1975	1464	1474	1458	1663	1447	1965	1868	1966	2285	1842	3819	3971	2096	2886	2736	3224	3033	1894	3299	2331
ENSG00000087589	CASS4	8	10	13	4	12	10	5	6	16	9	6	7	9	5	3	14	5	4	7	5	1	12	2	5	10	10	14	5	11	12
ENSG00000087842	PIR	1629	1157	1256	1342	1127	805	1133	1036	1487	1508	1023	1083	1155	1083	1111	922	831	1562	965	1342	1716	1760	1482	1296	2014	1694	1454	1473	1620	1729
ENSG00000087884	AAMDC	207	118	130	134	133	71	119	114	153	151	127	109	135	99	119	117	99	195	113	232	174	201	164	120	304	177	162	180	185	212
ENSG00000087903	RFX2	407	326	333	371	269	207	260	224	392	418	302	326	258	285	278	325	297	363	307	329	549	549	457	450	674	563	483	425	533	413
ENSG00000087995	METTL2A	1079	856	830	997	732	610	793	686	1015	984	705	772	701	794	714	837	843	1053	866	953	1530	1561	1006	1183	1400	1320	1291	990	1346	1194
ENSG00000088002	SULT2B1	429	249	274	301	228	187	249	218	327	375	269	262	252	276	274	203	193	428	278	373	442	463	439	312	686	406	401	433	474	543
ENSG00000088035	ALG6	536	400	414	565	354	262	327	333	522	506	382	322	398	331	302	455	461	457	549	644	1092	976	575	781	591	650	618	371	663	865
ENSG00000088038	CNOT3	1793	1335	1270	1531	1216	879	1223	994	1759	1726	1298	1221	1208	1425	1297	1328	1082	1417	1429	1405	2310	2225	1697	1798	2245	2146	2044	1487	2074	1689
ENSG00000088053	GP6	1	0	0	2	0	0	0	0	1	1	1	0	0	1	0	1	0	2	0	0	3	0	0	3	0	0	0	0	0	0
ENSG00000088179	PTPN4	1060	782	972	900	828	572	675	708	1021	1140	702	621	808	740	730	654	639	821	751	1274	1290	1352	1226	1040	1567	1101	1003	907	958	1672
ENSG00000088205	DDX18	3117	2346	2660	2931	2301	1752	2277	1886	3073	3081	2161	2184	2437	2303	2144	2553	2341	2875	2906	3076	4856	5107	3527	3519	4059	4096	3695	2591	4163	4080
ENSG00000088247	KHSRP	12464	9451	8288	10659	7727	6041	8974	6646	11700	11804	8928	8778	8171	9230	8485	9704	8372	10304	10325	9377	17606	17122	12014	13207	14669	15826	13961	10039	15264	11533
ENSG00000088256	GNA11	3896	2976	2505	3126	2103	1798	2836	2262	4200	3456	3232	3037	2937	3300	2964	2595	2334	3304	2709	2192	5458	5169	4018	4034	4648	4513	3946	3180	4312	3517
ENSG00000088280	ASAP3	452	364	383	357	363	233	323	274	512	552	331	324	355	381	415	257	262	499	300	534	461	517	606	426	1057	463	425	539	450	736
ENSG00000088298	EDEM2	683	502	516	534	497	326	441	428	548	666	501	446	467	431	478	432	340	666	414	588	678	688	649	538	945	687	653	628	622	758
ENSG00000088305	DNMT3B	630	421	432	513	440	321	427	377	639	543	450	392	397	439	428	433	379	492	503	458	833	894	633	630	742	773	730	505	710	553
ENSG00000088320	REM1	1	0	0	0	0	0	1	0	0	0	1	0	0	0	0	0	0	0	0	0	0	0	0	0	1	0	0	0	0	0
ENSG00000088325	TPX2	6645	4787	4708	6051	4324	3361	4418	3703	6356	6188	4519	4688	4297	4699	4346	6102	5453	5610	6520	5669	11371	11320	6810	8162	8528	9934	9347	5978	9957	7276
ENSG00000088340	FER1L4	52	33	28	50	37	28	41	37	62	36	58	27	54	37	27	23	26	37	28	42	38	47	42	29	81	41	36	46	38	63
ENSG00000088356	PDRG1	1420	1056	978	1116	929	652	941	843	1334	1291	905	956	898	983	907	963	827	1457	1030	1232	1760	1856	1278	1374	1850	1624	1548	1359	1745	1466
ENSG00000088367	EPB41L1	2663	1841	1801	2242	1741	1295	1860	1399	2559	2582	1762	1851	1697	1962	1888	1435	1247	1890	1460	1895	2709	2513	2228	1961	3250	2338	2219	1917	2359	2476
ENSG00000088386	SLC15A1	0	1	0	0	0	0	0	0	0	0	0	0	0	0	0	1	0	0	0	0	0	0	0	0	0	0	0	0	2	1
ENSG00000088387	DOCK9	1701	1191	1366	1598	1166	881	1155	1116	1739	1875	1166	1136	1253	1271	1246	1002	884	1169	991	1473	1696	1739	1706	1251	2405	1491	1383	1288	1463	1998
ENSG00000088448	ANKRD10	916	711	867	955	735	536	694	683	932	1036	605	623	755	652	625	581	550	667	632	934	1176	1149	1083	868	1181	1067	863	762	834	1221
ENSG00000088451	TGDS	221	154	191	200	135	142	173	140	257	211	166	168	194	157	148	166	181	194	215	274	385	384	281	325	242	287	263	154	268	394
ENSG00000088538	DOCK3	252	180	205	244	204	139	172	188	284	254	167	164	205	188	167	115	104	179	123	247	222	218	258	146	376	219	192	228	191	338
ENSG00000088543	C3orf18	348	287	280	286	235	160	229	219	409	370	269	278	270	270	282	214	183	352	254	341	363	378	357	295	533	336	320	427	345	437
ENSG00000088682	COQ9	2947	1979	2098	2323	1721	1386	1989	1749	2609	2671	1872	1857	1954	1977	1974	1962	1725	2497	1985	2144	3509	3607	2464	2508	3574	3339	3081	2538	3230	2742
ENSG00000088726	TMEM40	28	19	12	23	25	9	5	14	13	26	10	7	13	17	16	6	4	18	4	12	13	17	16	9	27	9	16	20	15	25
ENSG00000088727	KIF9	380	296	321	319	259	189	266	238	353	345	234	301	256	276	220	219	221	314	245	320	465	435	358	284	496	380	371	302	383	374
ENSG00000088756	ARHGAP28	598	444	523	542	463	374	416	422	591	681	414	433	474	418	413	589	522	426	479	622	1010	1035	618	677	768	882	718	478	689	768
ENSG00000088766	CRLS1	1336	988	1039	1292	909	757	936	778	1348	1105	968	1015	932	901	886	1025	994	1228	1225	1259	2169	2139	1343	1653	1380	1551	1391	978	1568	1601
ENSG00000088782	DEFB127	0	0	0	0	0	0	0	0	0	0	0	0	0	0	0	0	0	0	0	0	0	0	0	0	0	0	0	0	0	0
ENSG00000088808	PPP1R13B	1496	1016	1067	1231	981	717	998	869	1405	1302	1014	1044	978	1051	881	956	710	1052	924	1117	1574	1563	1357	1143	1849	1517	1333	1136	1372	1408
ENSG00000088812	ATRN	3710	2779	3227	3493	2826	2030	2611	2573	3805	4025	2522	2646	2880	2817	2777	2172	1950	2998	2413	3719	4204	4245	3857	3011	5101	3671	3284	3046	3450	4416
ENSG00000088826	SMOX	169	104	119	107	103	60	100	98	163	132	111	98	130	111	103	63	48	165	76	128	122	98	159	108	246	108	104	160	123	163
ENSG00000088827	SIGLEC1	9	0	0	0	1	1	1	0	2	4	2	2	1	2	0	1	0	4	2	1	1	0	1	1	2	4	1	3	1	3
ENSG00000088832	FKBP1A	6101	4411	4793	5342	4161	3149	4297	3771	5610	5880	3944	4062	4306	4174	4161	3868	3671	5379	4565	5545	7290	7577	5197	5640	7606	6636	5914	5080	6377	6686
ENSG00000088833	NSFL1C	2583	2033	1745	2164	1608	1276	1897	1562	2617	2328	1919	1984	1785	2099	1916	1455	1350	2396	1631	1670	2887	2958	2224	2225	3084	2800	2397	2126	2656	2358
ENSG00000088836	SLC4A11	301	228	255	244	223	123	209	171	264	327	217	184	200	211	194	138	105	196	146	289	246	244	245	195	424	251	200	231	217	302
ENSG00000088854	C20orf194	317	233	316	293	248	177	232	215	387	341	237	194	229	221	259	159	147	226	145	322	301	309	313	243	470	257	245	241	283	410
ENSG00000088876	ZNF343	776	547	547	644	437	361	527	445	758	735	527	509	501	559	498	528	436	550	476	519	923	968	693	654	842	841	711	575	794	679
ENSG00000088881	EBF4	116	69	50	87	59	40	63	64	89	72	81	62	54	50	56	47	45	55	50	80	75	70	79	66	104	119	90	82	67	71
ENSG00000088882	CPXM1	2	0	0	0	0	0	0	0	0	0	0	0	0	0	0	0	0	0	0	0	0	0	0	0	0	0	0	0	0	0
ENSG00000088888	MAVS	4182	3138	2835	3508	2691	1990	2969	2233	4125	3771	2852	2755	2602	2985	2743	2430	2046	3125	2580	3070	4313	4208	3793	3363	4987	4124	3506	3137	3871	3483
ENSG00000088899	LZTS3	149	93	85	116	79	55	92	111	216	125	171	162	183	177	138	65	75	159	94	107	208	179	244	138	262	147	120	207	133	192
ENSG00000088926	F11	1	0	0	1	0	0	0	0	1	0	1	0	1	0	0	0	0	0	1	0	1	0	0	0	0	0	1	0	0	3
ENSG00000088930	XRN2	4358	3365	3695	4062	3116	2270	2946	2724	4279	4324	3100	3070	3350	3075	2904	3591	3171	4179	3678	4573	6559	6496	4974	4478	5995	5531	4959	3858	5481	5776
ENSG00000088970	KIZ	354	296	373	335	267	208	241	278	367	409	280	248	340	282	254	206	181	350	243	364	451	491	460	328	586	383	352	344	332	552
ENSG00000088986	DYNLL1	5409	3900	3577	4638	3112	2778	3757	2766	4925	4302	3461	3625	3173	3812	3084	3536	3363	4795	4071	4419	6376	7016	4294	4990	6178	6010	5663	3978	6184	5442
ENSG00000088992	TESC	130	79	96	109	81	73	93	74	107	89	59	115	80	106	75	70	63	122	86	103	123	133	97	117	138	134	130	110	145	140
ENSG00000089006	SNX5	3635	2912	3119	3514	2733	2199	2570	2387	3839	3430	2599	2644	2853	2680	2286	3127	2784	3266	3438	3775	6302	6176	4120	4525	4618	4950	4459	3167	4748	4929
ENSG00000089009	RPL6	49431	35567	40397	41729	32096	26069	33536	31116	44899	46669	30665	33368	37302	34197	33963	33378	30299	51547	36546	44686	58117	66402	46057	45351	65375	57779	53001	45773	58670	55203
ENSG00000089012	SIRPG	1	0	0	0	0	0	0	0	0	0	0	0	0	0	0	0	0	0	0	0	0	0	0	0	0	0	0	0	0	0
ENSG00000089022	MAPKAPK5	1654	1237	1209	1499	1190	842	1077	1041	1596	1491	1129	1089	1122	1179	1095	1097	935	1292	1096	1304	1894	1961	1558	1425	1990	1849	1632	1471	1635	1681
ENSG00000089041	P2RX7	15	7	3	12	15	3	19	8	12	13	6	13	7	12	9	5	5	18	12	12	16	20	16	3	31	17	2	6	18	29
ENSG00000089048	ESF1	947	677	743	805	514	508	648	660	1249	866	846	933	981	871	668	795	833	822	909	531	1816	1820	1226	1265	1037	1435	1186	764	1292	1137
ENSG00000089050	RBBP9	1324	1067	1124	1193	958	724	920	787	1360	1404	891	1001	964	933	987	967	948	1309	1159	1454	1990	1862	1422	1560	1851	1537	1358	1183	1519	1681
ENSG00000089053	ANAPC5	5697	4355	4789	5239	3955	3085	3918	3565	5483	5590	4044	4087	4313	4130	4013	4204	3836	5419	4687	4937	7613	8042	5814	5713	6902	6795	6389	5017	6847	6165
ENSG00000089057	SLC23A2	1480	1098	1101	1337	1051	721	971	877	1520	1384	1056	1022	1079	1079	961	1029	861	1052	941	1263	1759	1766	1562	1264	1842	1625	1494	1218	1496	1423
ENSG00000089060	SLC8B1	729	540	516	604	468	353	489	401	680	683	509	457	502	471	461	361	336	536	350	471	694	777	641	473	905	669	609	623	634	669
ENSG00000089063	TMEM230	2931	2223	2536	2746	2072	1551	1903	1963	2769	2999	1959	2000	2312	2060	2081	1830	1787	2891	2155	3038	3494	3728	2896	2751	3870	2992	2835	2453	3033	3881
ENSG00000089091	DZANK1	118	84	67	111	91	51	94	83	139	116	75	72	80	73	73	63	45	90	60	108	108	125	107	76	157	100	91	84	79	161
ENSG00000089094	KDM2B	874	674	600	708	492	395	580	460	819	796	637	600	595	692	607	544	482	684	561	487	1125	1125	864	846	987	1045	932	679	1009	805
ENSG00000089101	CFAP61	27	23	34	21	20	17	22	23	24	39	13	29	40	17	16	14	23	24	12	30	31	26	24	20	38	23	14	34	21	42
ENSG00000089116	LHX5	1	1	2	1	0	0	2	0	1	1	0	0	0	1	1	0	0	1	0	1	0	0	0	2	2	0	0	0	0	0
ENSG00000089123	TASP1	730	467	521	552	412	327	493	431	625	654	464	450	455	410	351	436	357	526	434	519	739	844	621	560	742	750	621	538	696	716
ENSG00000089127	OAS1	15	10	9	7	10	5	6	10	8	8	7	10	7	3	8	9	4	10	4	7	6	7	8	16	12	15	14	9	15	8
ENSG00000089154	GCN1	13659	10123	8468	11283	8443	6579	9130	7657	14226	12160	10377	10088	9267	10707	9444	10275	9009	10718	10341	8498	19100	17927	13635	13681	15907	17667	14873	11480	15387	11697
ENSG00000089157	RPLP0	97675	69721	76928	81539	63269	50278	68513	59792	85887	89941	61449	66077	72583	67364	68393	60562	56941	107580	67183	85640	107203	125671	88788	86392	133335	110031	101743	95563	111697	105065
ENSG00000089159	PXN	4393	3248	3158	3787	3080	2171	3066	2539	4244	4220	3042	2941	2823	3138	3145	2598	2236	3353	2786	3667	4682	4613	4004	3550	5889	4298	3919	3737	4366	4337
ENSG00000089163	SIRT4	38	23	13	23	15	15	15	12	41	45	10	15	15	23	7	14	10	30	9	23	16	25	22	22	31	26	14	20	23	25
ENSG00000089169	RPH3A	5	0	0	0	0	0	0	0	0	0	0	0	0	0	0	0	0	0	0	1	0	0	0	0	3	0	0	0	4	0
ENSG00000089177	KIF16B	395	281	315	339	301	190	271	293	420	414	277	297	295	272	285	249	195	237	230	354	376	410	388	317	571	336	332	342	382	486
ENSG00000089195	TRMT6	858	617	617	791	496	449	615	478	861	636	592	562	606	659	505	624	609	717	667	689	1225	1277	806	856	870	1010	862	658	1002	821
ENSG00000089199	CHGB	0	0	0	0	0	0	0	0	0	0	0	0	0	1	0	0	0	0	0	0	0	1	0	0	1	0	0	1	0	0
ENSG00000089220	PEBP1	14431	10305	11002	12292	9565	7133	10040	8665	12900	12978	9352	9539	9741	9770	9508	9441	8616	12403	10430	11730	17327	18063	12366	12766	16552	16237	14162	11903	15697	14286
ENSG00000089225	TBX5	6	0	0	0	1	3	2	3	5	3	3	2	1	1	2	1	4	2	1	5	7	8	3	3	0	2	6	2	1	1
ENSG00000089234	BRAP	1038	745	805	957	762	539	741	667	997	959	694	753	825	784	695	721	646	876	772	993	1325	1259	1085	947	1341	1117	1108	856	1170	1093
ENSG00000089248	ERP29	4225	2937	3227	3514	3089	2067	2993	2800	3829	4053	2796	2847	3210	3015	2990	2724	2437	4954	2916	4362	5187	5366	4640	3741	7302	4955	4271	4831	4744	5406
ENSG00000089250	NOS1	4	1	1	0	3	2	0	1	3	1	2	0	1	2	1	1	2	2	3	0	2	2	1	4	4	2	1	3	2	0
ENSG00000089280	FUS	4757	3921	3064	3921	2774	2514	3440	2848	6962	4055	4953	4728	4702	4930	3470	4376	4020	4416	4791	2758	10034	9063	6400	7081	6225	8407	6552	4294	7073	4797
ENSG00000089289	IGBP1	1514	1087	1348	1354	1041	801	987	1028	1364	1537	899	1018	1223	1001	1092	1010	881	1751	1049	1589	1813	1835	1644	1378	2404	1796	1630	1696	1648	1926
ENSG00000089327	FXYD5	13	4	10	9	6	4	8	4	6	11	5	5	7	10	5	4	5	13	2	6	8	5	7	7	15	12	4	11	9	7
ENSG00000089335	ZNF302	903	744	904	919	787	558	617	618	1009	932	690	656	802	593	647	618	575	735	629	996	1317	1244	1043	958	1285	924	862	723	976	1451
ENSG00000089351	GRAMD1A	1996	1435	1524	1526	1285	971	1424	1279	1904	1877	1249	1323	1393	1371	1372	1098	1021	1760	1227	1713	2078	2042	2045	1581	2971	1942	1803	1991	1924	2084
ENSG00000089356	FXYD3	1186	778	891	899	756	582	739	701	993	1023	683	761	819	780	724	513	486	860	542	692	870	1033	726	715	1154	945	810	799	928	885
ENSG00000089472	HEPH	15	8	11	14	12	5	12	15	18	14	13	11	12	14	16	13	8	21	13	24	19	19	17	8	28	21	15	14	17	21
ENSG00000089486	CDIP1	2799	1968	1888	2354	1679	1320	1859	1456	2453	2573	1819	1852	1662	2011	2025	1828	1589	2363	1836	2180	3253	3198	2565	2452	3559	3034	2793	2510	2954	2595
ENSG00000089505	CMTM1	99	66	59	70	80	52	64	39	83	83	69	57	52	77	50	69	48	55	68	70	96	125	94	84	114	135	105	60	92	89
ENSG00000089558	KCNH4	9	7	3	7	10	8	7	4	10	8	7	4	8	0	2	2	3	1	3	5	10	11	3	13	6	14	10	1	4	0
ENSG00000089597	GANAB	20421	14987	15198	17197	13802	9777	14229	12466	18971	19367	13858	14028	13840	14833	14080	14108	12285	17641	14416	17125	25366	25016	20139	18332	27660	23016	20845	18748	22261	20272
ENSG00000089639	GMIP	703	508	414	531	411	347	482	401	729	584	531	485	447	524	451	313	253	471	335	411	552	606	582	470	832	558	474	584	584	560
ENSG00000089682	RBM41	850	679	682	802	595	515	630	566	953	799	616	610	622	605	557	525	500	583	559	664	958	989	859	721	925	804	747	612	734	1004
ENSG00000089685	BIRC5	4961	3577	3203	4255	3058	2409	3469	2545	4352	3928	3210	3266	2946	3285	2949	4299	3882	4398	4761	4202	7856	8195	4301	5955	5989	7187	6434	4115	7104	5007
ENSG00000089692	LAG3	37	42	38	35	22	16	25	30	56	37	30	30	47	22	22	18	12	16	28	28	40	42	49	38	53	53	25	37	22	43
ENSG00000089693	MLF2	11867	8508	8524	9915	7832	5814	8345	7017	10498	10691	7430	7991	7606	8264	7994	6521	6078	10921	7563	9596	11797	12809	9987	9230	14630	11558	10424	10326	11555	11193
ENSG00000089723	OTUB2	423	292	292	406	264	223	283	207	392	351	256	228	244	285	276	295	233	403	289	407	496	465	402	344	691	393	408	416	412	533
ENSG00000089737	DDX24	9733	6881	6406	7948	5756	4655	6508	5311	8773	8343	6386	6533	6151	6924	6011	6509	5728	7632	6856	6664	11759	11890	8140	8433	11008	10730	9705	7633	10473	8071
ENSG00000089775	ZBTB25	1229	924	1039	1091	950	666	808	797	1279	1159	823	744	826	813	821	835	745	850	811	1083	1594	1453	1226	1104	1493	1244	1008	912	1163	1372
ENSG00000089818	NECAP1	2879	2165	2328	2619	2087	1614	1958	1768	2722	2849	2065	2034	2147	2046	1920	1967	1805	2452	2205	2816	3913	3662	2726	2832	3694	3256	2803	2270	3198	3355
ENSG00000089820	ARHGAP4	32	34	32	32	12	15	15	30	44	34	24	28	43	32	34	20	13	37	20	16	52	30	49	32	63	31	31	28	33	50
ENSG00000089847	ANKRD24	51	43	54	23	39	19	36	26	94	47	41	71	81	54	42	39	28	50	37	46	69	64	74	52	116	69	61	61	68	56
ENSG00000089876	DHX32	1756	1352	1502	1589	1394	964	1163	1145	1697	1825	1189	1230	1428	1185	1359	1247	1142	1465	1280	1656	2267	2319	1638	1629	2266	1896	1789	1432	1928	2121
ENSG00000089902	RCOR1	2693	2076	2078	2426	1918	1389	1895	1624	2655	2612	1823	1863	1917	1884	1820	1914	1706	2077	2012	2421	3631	3480	2811	2687	3429	2993	2701	2155	2931	3188
ENSG00000089916	GPATCH2L	2600	2042	2274	2349	1949	1534	1930	1925	2795	2719	1888	1766	1992	1900	1771	1520	1399	1832	1540	2318	2887	2912	2738	2049	3169	2444	2283	2045	2257	3024
ENSG00000090006	LTBP4	1123	827	775	864	723	599	767	804	1271	1052	928	892	865	839	864	602	545	848	669	709	1182	1168	1303	910	1480	1243	944	971	1033	1037
ENSG00000090013	BLVRB	3457	2497	2539	2823	2203	1744	2517	1911	3047	3095	2237	2313	2234	2297	2309	1823	1628	3189	1871	2404	2992	3289	2483	2292	3955	3262	2850	2863	3020	2809
ENSG00000090020	SLC9A1	3070	2260	2387	2556	2196	1411	2095	1842	2930	3408	2108	1950	2098	2181	2330	1717	1605	2416	1892	2879	3308	2957	3041	2306	4728	2986	2642	2702	3021	3288
ENSG00000090054	SPTLC1	1735	1280	1507	1464	1210	978	1072	1095	1649	1721	1191	1211	1449	1143	1206	1159	1052	1564	1337	1679	2116	2324	1726	1554	2361	1856	1762	1472	1988	2203
ENSG00000090060	PAPOLA	7379	5744	6335	7101	5570	4448	5147	4743	7646	7664	5175	5353	5824	5265	5133	6058	5698	6857	6882	8505	12288	12577	8686	8678	10245	9624	8822	6342	9312	11366
ENSG00000090061	CCNK	2184	1687	1757	2016	1625	1095	1480	1368	2241	2327	1669	1548	1688	1651	1687	1775	1448	1844	1786	2070	3213	3112	2305	2306	3070	2850	2498	1948	2609	2585
ENSG00000090097	PCBP4	563	406	404	464	394	274	385	352	568	493	425	387	379	411	423	242	246	557	280	501	448	517	466	395	778	437	409	489	478	626
ENSG00000090104	RGS1	0	0	1	1	1	2	0	1	0	0	0	3	0	0	2	0	0	0	0	0	1	1	0	0	0	2	0	1	0	0
ENSG00000090238	YPEL3	354	207	225	265	238	194	237	185	274	317	217	202	166	185	224	108	104	246	139	272	238	235	245	162	449	220	214	253	226	311
ENSG00000090263	MRPS33	2133	1467	1766	1826	1453	1243	1467	1387	1947	1994	1302	1544	1719	1523	1451	1509	1557	2105	1774	1931	3015	3256	1999	2265	2792	2722	2374	1854	2647	2670
ENSG00000090266	NDUFB2	2496	1727	1885	1997	1643	1253	1761	1588	2184	2074	1538	1652	1793	1736	1655	1550	1502	2612	1706	2110	2688	3028	2097	2104	3417	2817	2624	2388	2848	2634
ENSG00000090273	NUDC	3655	2720	2049	2736	1842	1746	2708	1927	4078	2853	3289	3289	2860	3351	2636	2756	2476	3325	2903	1707	5802	5261	3786	4050	4453	5540	4696	3398	4981	3071
ENSG00000090316	MAEA	3132	2248	2208	2589	2003	1633	2136	1725	2782	2667	2141	2210	2065	2319	2175	2350	2045	2967	2462	2430	4248	4413	3099	3078	3969	3926	3510	2911	3757	3083
ENSG00000090339	ICAM1	1	0	0	1	1	1	0	0	1	0	2	1	0	3	0	0	1	0	0	1	0	2	2	0	2	1	0	3	2	0
ENSG00000090372	STRN4	2275	1576	1602	1890	1472	1039	1582	1238	2258	2119	1418	1546	1522	1541	1556	1319	1230	1863	1439	1786	2377	2490	2040	1941	3051	2461	2293	2026	2396	2204
ENSG00000090376	IRAK3	1	0	1	1	0	1	0	0	0	0	1	1	1	0	0	1	0	1	1	2	3	6	0	1	2	1	1	0	1	0
ENSG00000090382	LYZ	0	0	3	0	3	4	0	0	0	3	0	1	1	2	3	1	0	0	1	1	0	0	0	1	3	1	2	0	1	2
ENSG00000090402	SI	2094	1776	2235	2124	1960	1197	1506	1544	2281	2734	1457	1544	1921	1461	1791	1425	1444	1812	1783	3249	2723	2916	2655	2266	4038	2069	2166	1769	2587	4235
ENSG00000090432	MUL1	802	621	588	713	549	419	572	429	751	737	565	600	520	580	638	488	447	665	583	687	872	896	660	694	984	953	748	582	892	803
ENSG00000090447	TFAP4	1450	1057	985	1251	879	678	1003	775	1496	1189	1026	1034	1027	994	936	1115	975	1192	1086	870	1900	1879	1335	1425	1368	1879	1629	1135	1782	954
ENSG00000090470	PDCD7	1090	830	788	1010	707	577	802	680	1110	1040	809	677	807	761	694	724	678	824	768	777	1337	1397	990	974	1277	1294	1131	802	1148	1018
ENSG00000090487	SPG21	3335	2591	2903	2993	2473	1848	2375	2182	3251	3420	2318	2436	2789	2512	2511	2422	2373	3061	2599	3292	4800	4637	3430	3513	4192	3930	3474	2867	3630	4194
ENSG00000090512	FETUB	2	0	0	0	0	0	0	0	0	0	0	0	0	0	0	0	0	0	0	0	0	0	0	0	0	0	0	0	1	0
ENSG00000090520	DNAJB11	2852	2056	2127	2366	1744	1506	1924	1790	2720	2364	1901	2006	2043	2030	1766	2102	1827	2863	2108	2385	4035	3887	2848	2742	3797	3550	3209	2738	3362	3233
ENSG00000090530	P3H2	192	126	181	164	126	86	103	137	177	156	132	122	128	128	110	78	61	101	87	106	135	103	124	122	191	137	95	113	130	131
ENSG00000090534	THPO	7	3	4	1	4	1	0	1	3	2	5	3	7	1	2	1	2	3	7	6	8	2	6	4	3	3	0	6	2	4
ENSG00000090539	CHRD	24	19	25	10	12	13	11	12	32	20	23	15	19	12	29	9	5	25	14	30	21	28	24	24	40	20	18	23	19	30
ENSG00000090554	FLT3LG	0	0	0	1	0	0	1	0	1	0	1	1	0	0	0	2	0	0	1	0	0	0	0	2	0	0	0	1	0	2
ENSG00000090565	RAB11FIP3	1295	1005	729	977	667	646	908	781	1574	1111	1271	1244	1237	1319	973	840	812	1036	924	592	1947	1764	1530	1386	1680	1662	1390	1124	1380	1161
ENSG00000090581	GNPTG	696	429	479	533	468	325	461	425	650	561	470	473	470	513	476	395	345	561	352	556	596	631	604	484	894	658	566	590	613	664
ENSG00000090612	ZNF268	1216	862	998	1149	855	727	893	754	1218	1342	843	888	834	869	811	831	769	987	901	1330	1656	1722	1416	1142	1662	1356	1269	983	1364	1686
ENSG00000090615	GOLGA3	5857	4469	3612	4186	3037	2682	3879	3721	8491	4978	6124	6010	6689	6423	4571	4626	4283	4555	4640	2885	10676	9434	8230	7000	7423	7937	5936	5243	6459	5204
ENSG00000090621	PABPC4	9866	7022	7702	8441	6708	4825	6878	6179	9123	9308	6419	6628	6949	6514	6663	7190	6436	7752	7559	7254	13341	13146	8769	9652	10847	11772	10544	8057	11478	9250
ENSG00000090659	CD209	2	0	0	0	0	0	0	0	0	0	0	0	0	0	0	0	0	0	0	0	0	0	0	2	0	0	0	0	0	0
ENSG00000090661	CERS4	1339	992	992	1071	924	681	877	862	1291	1317	863	875	889	914	895	598	602	1241	703	1256	1136	1218	1135	908	2059	1160	1089	1337	1130	1591
ENSG00000090674	MCOLN1	548	371	387	439	310	278	392	319	516	467	304	362	297	339	313	357	302	467	358	368	534	631	433	439	653	562	540	456	538	445
ENSG00000090686	USP48	1253	858	1003	1144	874	685	771	819	1276	1131	924	877	929	883	771	894	789	989	914	1093	1642	1716	1374	1153	1554	1441	1263	1072	1422	1538
ENSG00000090776	EFNB1	426	283	238	317	233	217	274	223	434	327	310	247	286	279	284	243	224	367	229	276	418	461	358	331	458	380	350	312	400	373
ENSG00000090857	PDPR	1350	972	1020	1209	1011	640	902	792	1364	1341	937	869	893	928	917	870	746	987	889	1100	1636	1504	1423	1181	1627	1400	1241	1037	1296	1341
ENSG00000090861	AARS	11467	8779	12819	9793	10838	5959	8114	11150	12078	16046	8740	8850	14204	9784	13005	10542	9547	18785	11709	17249	19831	20348	22680	15403	34876	18519	16999	20242	18248	25964
ENSG00000090863	GLG1	5110	3797	4034	4398	3683	2491	3417	3417	5044	5234	3634	3651	3885	3956	3943	3263	2845	4276	3245	4760	6043	5636	5537	4464	7808	5102	4755	4477	4931	6039
ENSG00000090889	KIF4A	2253	1665	1691	2004	1543	1153	1637	1422	2266	2211	1488	1577	1689	1605	1523	2036	1729	1716	2036	1754	3519	3613	2140	2534	2939	3174	2810	1950	3053	2355
ENSG00000090905	TNRC6A	5396	3876	3704	4487	3436	2667	3703	3219	5529	5014	3779	3519	3571	3736	3312	3483	2876	3718	3429	3781	6235	5911	4943	4472	6041	5535	4970	3719	5284	5162
ENSG00000090924	PLEKHG2	522	381	356	417	294	226	319	278	492	436	324	346	319	367	305	325	315	336	275	318	539	552	374	396	460	506	460	409	483	360
ENSG00000090932	DLL3	356	268	240	291	225	159	230	194	284	268	212	224	201	232	219	195	210	414	267	261	440	437	285	288	464	410	388	344	431	323
ENSG00000090971	NAT14	473	345	349	437	329	224	354	291	433	473	334	322	292	366	354	263	270	529	293	437	490	526	408	391	798	460	486	549	539	521
ENSG00000090975	PITPNM2	606	362	387	500	335	264	373	284	541	416	372	361	395	387	319	303	245	369	324	348	483	515	491	386	611	450	424	408	476	410
ENSG00000090989	EXOC1	1018	787	959	980	816	545	676	729	1074	1126	715	720	904	730	702	704	637	804	760	1132	1256	1296	1129	917	1445	1026	991	877	1018	1534
ENSG00000091009	RBM27	2138	1577	1688	1788	1448	1090	1437	1298	2032	2030	1409	1457	1584	1496	1414	1508	1421	1684	1612	1894	2984	2896	2161	2085	2673	2465	2281	1698	2310	2585
ENSG00000091010	POU4F3	0	1	1	1	0	0	0	1	0	0	0	0	0	0	0	0	0	0	0	0	0	0	0	0	0	1	1	2	1	1
ENSG00000091039	OSBPL8	4194	3300	3885	4104	3020	2421	2970	2579	4266	3982	3036	3038	3545	3016	2694	4136	4128	4001	4519	4230	8148	8604	5946	6013	4566	6359	5843	4238	5844	5562
ENSG00000091073	DTX2	773	575	510	577	417	283	503	421	689	618	495	471	459	497	428	436	440	542	479	494	828	815	634	634	778	804	712	551	739	630
ENSG00000091106	NLRC4	1	0	1	0	0	0	0	1	0	0	1	0	0	0	0	0	0	0	0	0	0	0	0	0	0	0	1	0	0	0
ENSG00000091127	PUS7	1845	1327	1356	1714	1239	995	1369	1125	1984	1634	1259	1255	1298	1338	1131	1310	1226	1382	1405	1529	2559	2477	1886	1892	1980	2261	1940	1457	2006	1802
ENSG00000091128	LAMB4	49	21	26	21	15	23	25	21	27	30	9	12	44	19	16	14	17	21	13	11	22	33	20	30	13	36	34	27	35	16
ENSG00000091129	NRCAM	11	5	2	10	3	10	9	3	3	8	4	4	9	8	8	5	1	0	5	7	5	9	6	6	16	6	5	3	4	4
ENSG00000091136	LAMB1	372	281	231	337	253	199	199	237	351	332	217	234	231	257	235	207	208	348	259	335	401	391	439	316	581	343	338	357	387	435
ENSG00000091137	SLC26A4	4	4	3	1	0	1	7	6	4	7	3	3	5	1	2	1	3	3	2	4	4	8	6	7	6	3	2	0	3	2
ENSG00000091138	SLC26A3	2	2	0	0	0	3	0	2	0	0	3	2	0	0	1	2	0	0	0	0	1	2	1	2	0	3	5	1	1	2
ENSG00000091140	DLD	4316	3293	3775	4016	3057	2510	2902	2854	4266	4321	2937	3072	3784	3097	2934	3334	3207	3977	3755	4488	6424	6698	5044	4626	5915	5412	4624	3437	5200	6412
ENSG00000091157	WDR7	2332	1784	1897	2011	1736	1303	1614	1531	2251	2416	1618	1602	1788	1664	1635	1497	1290	1807	1532	2013	2580	2588	2294	1914	2894	2324	1983	1774	2171	2645
ENSG00000091164	TXNL1	2233	1716	1987	2269	1728	1374	1539	1553	2406	2362	1759	1645	1854	1615	1640	1757	1782	2409	2131	2757	3639	3586	2501	2632	3287	2954	2542	1965	2846	3555
ENSG00000091181	IL5RA	19	6	13	8	5	4	5	8	9	5	5	4	9	9	9	6	8	10	2	14	10	15	2	5	15	12	12	3	8	4
ENSG00000091262	ABCC6	78	71	43	74	54	49	63	56	92	89	65	51	67	61	53	46	33	50	50	70	100	103	93	90	125	87	52	74	84	93
ENSG00000091317	CMTM6	2942	2176	2532	2827	2233	1708	1984	1823	2876	3072	1942	2026	2319	2027	2092	2054	1957	2633	2415	3292	4359	4335	3229	3203	3738	3044	2764	2386	3173	4574
ENSG00000091409	ITGA6	1620	1274	1503	1644	1401	914	1177	1143	1704	1873	1172	1204	1364	1231	1292	1217	1052	1333	1233	1899	2385	2329	1909	1650	2370	1837	1724	1423	1784	2429
ENSG00000091428	RAPGEF4	12	2	5	8	9	2	6	5	10	3	6	3	10	3	6	2	3	7	4	4	8	5	14	7	5	7	5	6	5	13
ENSG00000091436	MAP3K20	1047	752	852	995	789	590	692	612	1115	1075	662	705	770	725	749	858	759	902	976	1152	1667	1683	1208	1171	1447	1430	1266	886	1421	1417
ENSG00000091482	SMPX	1	1	0	0	0	0	0	0	0	0	0	0	1	0	0	0	0	0	0	0	1	0	0	0	0	0	0	0	0	0
ENSG00000091483	FH	5206	3852	4262	4650	3661	2862	3363	3098	4717	4865	3365	3551	3916	3634	3511	3922	3664	4638	4419	4418	7200	7531	4651	5102	6145	6549	5929	4140	6626	5465
ENSG00000091490	SEL1L3	4483	3419	4391	4137	3946	2441	3150	3606	4330	5679	3090	3044	4109	3279	3798	2949	2779	6189	3127	6486	5494	5830	6979	4080	9901	4979	4589	5886	4802	8448
ENSG00000091513	TF	9	2	3	1	4	3	1	2	6	2	2	1	0	1	3	0	0	2	4	3	3	4	6	0	13	5	4	5	0	5
ENSG00000091527	CDV3	6453	4978	5349	6155	4539	3557	4253	4148	6422	6702	4527	4487	5135	4849	4400	5159	4749	5585	5614	5884	10275	10051	7358	7322	7752	7947	7233	5379	7785	7557
ENSG00000091536	MYO15A	30	10	19	31	25	9	18	14	41	20	17	12	16	11	22	9	12	18	10	25	8	22	25	21	24	26	20	26	8	12
ENSG00000091542	ALKBH5	7352	5272	5306	6256	4821	3506	5100	4248	6922	6898	4947	5122	4765	5104	4968	4690	4240	6213	5173	5835	8787	8853	6684	6614	8944	7851	7028	6193	7642	7241
ENSG00000091583	APOH	0	0	0	0	1	1	0	0	2	0	1	0	1	0	0	0	0	2	1	0	0	0	0	0	0	2	0	1	1	0
ENSG00000091592	NLRP1	6	1	0	5	0	1	3	1	1	2	1	0	1	3	4	0	1	1	1	3	0	0	2	1	2	4	2	5	1	3
ENSG00000091622	PITPNM3	115	72	73	85	70	45	61	67	167	117	105	90	105	80	83	61	50	77	57	94	101	106	124	84	174	89	96	103	82	153
ENSG00000091640	SPAG7	1157	852	955	1011	826	616	880	764	1069	1055	749	765	836	938	808	738	635	1099	728	1012	1218	1350	916	950	1541	1184	1083	1088	1253	1226
ENSG00000091651	ORC6	1468	1119	1051	1308	905	760	1006	743	1400	1219	968	926	1002	1028	831	1326	1105	1227	1369	1033	2425	2573	1380	1678	1283	2112	1939	1184	2044	1228
ENSG00000091656	ZFHX4	926	721	771	818	673	487	614	616	978	1013	634	603	676	669	590	656	495	550	583	817	1152	1127	940	730	1192	989	929	696	843	987
ENSG00000091664	SLC17A6	2	0	0	0	0	0	0	0	0	0	0	0	0	0	0	0	0	0	0	0	0	0	0	0	0	0	0	0	0	0
ENSG00000091704	CPA1	0	0	0	0	0	0	0	0	0	0	0	0	0	0	0	0	1	0	0	0	0	0	0	0	0	0	0	0	0	0
ENSG00000091732	ZC3HC1	926	632	670	748	600	495	570	550	792	811	526	567	555	630	573	568	529	782	631	772	1076	1056	786	785	1122	1049	904	793	1016	877
ENSG00000091831	ESR1	3	0	0	0	0	0	0	0	0	0	0	0	0	0	0	0	0	0	1	0	0	0	0	0	0	0	0	0	0	2
ENSG00000091844	RGS17	18	13	12	10	8	13	17	16	21	20	14	17	12	9	15	8	4	15	6	25	12	13	24	13	33	11	11	17	7	30
ENSG00000091879	ANGPT2	2	6	14	9	5	4	5	24	6	14	2	3	6	6	7	2	3	6	7	9	7	5	16	11	8	14	3	11	5	12
ENSG00000091947	TMEM101	530	408	392	438	332	285	385	320	505	448	361	390	336	366	385	374	338	588	320	494	638	674	475	575	803	607	603	547	581	584
ENSG00000091972	CD200	6	0	0	2	5	2	1	1	1	0	4	0	3	2	2	1	0	1	0	3	0	1	2	1	4	1	0	3	2	3
ENSG00000091986	CCDC80	70	40	37	53	47	27	40	42	77	65	35	44	53	36	52	21	26	57	62	72	81	83	67	91	139	87	69	50	88	110
ENSG00000092009	CMA1	2	0	0	0	0	0	0	0	0	0	0	0	0	0	0	1	0	0	0	0	0	0	0	0	2	0	0	0	0	0
ENSG00000092010	PSME1	1608	1217	1347	1392	1115	846	1176	1140	1481	1666	995	1155	1177	1155	1216	976	871	1614	1095	1652	1675	1802	1462	1243	2623	1680	1556	1627	1746	1989
ENSG00000092020	PPP2R3C	474	356	415	493	336	278	316	286	498	446	350	349	371	347	330	379	370	472	428	488	841	715	496	559	536	619	563	349	550	649
ENSG00000092036	HAUS4	343	266	282	325	259	186	261	251	341	335	253	237	292	267	243	281	251	427	292	324	414	533	362	388	559	453	439	386	475	424
ENSG00000092051	JPH4	1	0	0	1	1	0	0	0	4	3	1	1	0	1	2	2	1	0	0	1	2	1	0	0	1	3	1	0	4	1
ENSG00000092054	MYH7	5	0	0	0	0	0	2	1	0	0	0	0	1	2	0	0	0	0	0	0	0	0	0	0	0	0	0	0	0	0
ENSG00000092067	CEBPE	1	0	0	0	0	0	0	0	0	0	0	0	0	0	0	0	0	0	0	0	0	0	0	1	1	0	0	0	0	0
ENSG00000092068	SLC7A8	2659	1871	1885	2254	1878	1222	1803	1478	2420	2864	1722	1713	1633	1926	2092	1776	1384	1789	1640	2334	2897	2759	2177	2138	3841	2855	2457	1954	2650	2774
ENSG00000092094	OSGEP	1038	764	854	1003	730	527	800	725	1070	954	762	734	677	732	692	680	596	911	739	826	1257	1296	913	985	1220	1220	1070	997	1200	972
ENSG00000092096	SLC22A17	604	448	378	462	404	320	386	342	553	541	349	393	366	338	361	293	269	504	332	456	533	525	562	377	772	508	444	531	528	572
ENSG00000092098	RNF31	783	536	490	615	414	362	521	413	790	630	571	547	513	518	481	387	355	611	450	436	745	819	626	597	825	728	624	651	701	601
ENSG00000092108	SCFD1	1991	1548	1815	1895	1444	1206	1260	1344	2005	1971	1323	1367	1682	1372	1285	1432	1379	1913	1603	2282	2802	2925	2395	2086	2862	2406	2222	1678	2371	3144
ENSG00000092140	G2E3	1254	1029	1225	1304	1063	795	933	823	1463	1442	987	932	1227	996	907	1209	1278	1106	1476	1729	2614	2649	1712	1911	1815	1952	1667	1064	1724	2369
ENSG00000092148	HECTD1	11461	8774	9609	10580	8555	6301	7595	7762	11846	12114	7924	8150	9147	8344	8343	7398	6589	8504	7664	10516	14011	13802	12039	9936	15550	11446	10697	9396	11201	14635
ENSG00000092199	HNRNPC	18533	13786	14869	16250	12936	10218	12631	11945	18069	18026	12547	12766	14373	12775	12681	15492	14805	19884	18059	19900	29680	31456	19935	22732	28041	26632	23992	18019	26189	24390
ENSG00000092200	RPGRIP1	28	15	22	17	18	16	21	14	18	18	17	20	24	12	11	19	11	20	11	21	33	30	5	37	42	28	20	12	31	26
ENSG00000092201	SUPT16H	8300	6192	5985	7063	5191	4232	5591	5041	8362	7684	5956	6071	5883	6338	5496	6476	5756	6919	6692	5965	11977	12379	8619	8390	9513	11050	9835	7271	10621	8234
ENSG00000092203	TOX4	3005	2172	2366	2635	1996	1433	2028	1768	2776	2863	1876	2003	2071	2055	2109	1963	1709	2543	2124	2747	3497	3561	3022	2580	4114	3070	2905	2500	3074	3241
ENSG00000092208	GEMIN2	538	373	484	488	422	294	364	355	492	493	368	388	414	378	364	423	441	522	525	548	864	856	566	608	790	686	710	522	774	743
ENSG00000092295	TGM1	98	66	81	77	80	43	55	50	91	89	74	69	69	78	70	57	39	87	60	116	114	96	114	71	219	122	123	88	100	150
ENSG00000092330	TINF2	1655	1209	1291	1410	1189	849	1120	1035	1535	1638	1100	1065	1197	1135	1218	883	852	1443	999	1407	1675	1863	1470	1361	2189	1722	1496	1476	1510	1696
ENSG00000092345	DAZL	1	0	0	0	0	0	0	0	0	0	0	0	0	0	0	0	0	0	0	0	2	0	0	0	0	0	0	0	0	1
ENSG00000092377	TBL1Y	86	62	80	73	80	48	72	71	105	117	47	50	75	55	79	46	60	114	51	141	98	122	119	89	194	83	91	93	108	138
ENSG00000092421	SEMA6A	8461	6399	7673	7646	7611	4363	5969	6058	8511	10520	5439	5140	6373	5902	6925	4069	3531	5873	4456	7889	7678	7370	7504	5890	12304	6557	6345	6411	6815	9998
ENSG00000092439	TRPM7	3233	2471	3176	3206	2695	1901	2217	2255	3374	3441	2306	2282	2912	2297	2219	2500	2258	2601	2579	3588	4930	4882	4139	3471	4237	3941	3518	2604	3467	4805
ENSG00000092445	TYRO3	1520	1176	932	1243	895	746	1009	770	1414	1293	1035	1006	883	1107	1040	900	767	1185	972	994	1692	1637	1236	1209	1717	1508	1370	1219	1516	1318
ENSG00000092470	WDR76	701	534	554	640	503	382	537	408	740	775	475	536	546	485	426	711	608	734	689	649	1344	1256	829	918	790	1167	993	652	1056	761
ENSG00000092529	CAPN3	8	2	2	6	6	1	1	6	13	11	2	2	2	5	3	4	4	5	2	6	10	3	7	2	7	2	1	9	6	10
ENSG00000092531	SNAP23	1370	1016	1208	1212	1017	745	891	895	1338	1466	952	866	1042	1013	953	940	812	1251	964	1301	1716	1781	1390	1277	1785	1441	1226	1070	1453	1628
ENSG00000092607	TBX15	101	75	49	61	20	55	63	29	74	27	69	60	39	38	13	96	60	27	58	22	131	125	30	66	26	138	91	26	65	22
ENSG00000092621	PHGDH	11620	8190	10311	9577	9391	5579	8223	8616	10293	13263	7300	7835	9485	8256	10149	8462	7792	18719	9441	18421	15221	16181	17965	11918	32233	14915	14071	19384	15663	24662
ENSG00000092758	COL9A3	135	88	87	104	88	59	78	63	136	99	87	74	82	78	83	64	57	128	85	101	122	112	129	106	171	113	108	105	112	145
ENSG00000092820	EZR	1540	1158	1012	1189	872	719	1143	938	1837	1363	1474	1495	1578	1462	1192	1027	976	1391	1133	792	2227	2060	1741	1608	1971	2020	1491	1397	1676	1565
ENSG00000092841	MYL6	10286	7412	7892	8634	6843	5221	7267	6604	9016	8929	6279	7027	7269	7172	6822	5960	5577	11118	6541	9227	10604	12248	8310	8361	14637	10837	9649	10110	10801	10945
ENSG00000092847	AGO1	5789	4187	4184	4944	3936	2911	4017	3345	5924	5533	4146	3717	3990	4240	3828	3496	3149	4225	3924	4645	6703	6456	5647	4994	7460	5751	5144	4498	5502	5935
ENSG00000092850	TEKT2	7	0	0	3	2	1	0	1	1	0	1	0	2	1	0	1	2	1	0	1	0	2	1	2	1	0	1	4	0	4
ENSG00000092853	CLSPN	1788	1367	993	1483	990	871	1188	985	2312	1530	1666	1692	1479	1754	1171	1723	1437	1368	1680	766	3285	3258	2063	2136	1648	2812	2375	1340	2426	1375
ENSG00000092871	RFFL	878	668	735	706	612	406	581	551	767	835	596	526	610	546	620	488	455	712	475	728	954	928	730	673	1077	783	685	685	728	904
ENSG00000092929	UNC13D	34	23	35	38	41	15	14	27	34	35	22	11	28	20	27	14	16	20	9	29	33	20	37	18	51	30	23	29	36	42
ENSG00000092931	MFSD11	827	576	688	731	598	434	610	572	797	827	578	563	646	597	585	535	545	630	527	769	951	960	732	745	993	902	751	651	867	911
ENSG00000092964	DPYSL2	1970	1442	1616	1760	1578	969	1326	1294	1873	2020	1273	1245	1450	1320	1416	1375	1289	1945	1663	2687	2678	2610	2330	2093	3998	2096	2065	1862	2504	3351
ENSG00000092969	TGFB2	21	15	12	10	13	13	12	12	12	18	17	10	10	9	5	10	4	11	13	14	27	29	12	10	23	20	14	10	10	16
ENSG00000092978	GPATCH2	1416	1072	1255	1241	1183	832	978	965	1553	1650	937	979	1160	1071	1057	945	844	1189	1026	1442	1844	1829	1479	1262	1920	1417	1393	1136	1485	1953
ENSG00000093000	NUP50	6186	4709	4548	5401	4061	3202	4083	3395	5846	5676	4105	4192	4011	4241	3869	4610	4172	4738	4759	4558	8755	8741	5785	6099	6318	7416	6808	4697	7296	5794
ENSG00000093009	CDC45	1568	1161	1120	1287	1020	787	1174	896	1490	1352	1102	1104	1015	1127	1083	1396	1309	1404	1509	1079	2731	2566	1566	1911	1663	2498	2226	1465	2346	1398
ENSG00000093010	COMT	4002	2915	2827	3376	2561	1949	2759	2357	3720	3731	2747	2712	2533	2834	2786	2669	2334	3906	2766	3085	4779	5068	3587	3580	5109	4847	4267	3672	4583	3764
ENSG00000093072	ADA2	59	36	49	46	40	15	27	35	50	41	38	37	41	36	40	23	20	46	40	53	59	60	49	28	79	50	45	40	49	65
ENSG00000093100	AC016026.1	27	15	13	18	6	11	23	14	35	18	31	22	16	23	12	21	19	16	20	13	46	22	37	27	18	29	29	27	17	22
ENSG00000093134	VNN3	2	0	0	0	0	0	0	0	0	0	0	0	0	0	0	0	0	0	0	0	0	0	0	0	0	0	0	0	0	0
ENSG00000093144	ECHDC1	18	7	12	17	11	9	8	13	25	11	18	7	8	14	12	13	13	7	12	11	21	24	11	15	22	11	13	13	12	25
ENSG00000093167	LRRFIP2	2277	1692	1808	1890	1443	1281	1607	1425	2155	1986	1565	1567	1646	1523	1392	1444	1247	1626	1402	1554	2773	2739	1978	1800	2393	2494	2123	1683	2090	2003
[truncated: 14,383 more rows]

## Sheet: Normalized Count Matrix 
GeneID	Gene	6hr_DMSO_Rep1	6hr_EPI_2.5_Rep1	6hr_EPI_25_Rep1	6hr_1ae_0.5_Rep1	6hr_1ae_5_Rep1	6hr_DMSO_Rep2	6hr_EPI_2.5_Rep2	6hr_EPI_25_Rep2	6hr_1ae_0.5_Rep2	6hr_1ae_5_Rep2	6hr_DMSO_Rep3	6hr_EPI_2.5_Rep3	6hr_EPI_25_Rep3	6hr_1ae_0.5_Rep3	6hr_1ae_5_Rep3	24hr_DMSO_Rep1	24hr_EPI_2.5_Rep1	24hr_EPI_25_Rep1	24hr_1ae_0.5_Rep1	24hr_1ae_5_Rep1	24hr_DMSO_Rep2	24hr_EPI_2.5_Rep2	24hr_EPI_25_Rep2	24hr_1ae_0.5_Rep2	24hr_1ae_5_Rep2	24hr_DMSO_Rep3	24hr_EPI_2.5_Rep3	24hr_EPI_25_Rep3	24hr_1ae_0.5_Rep3	24hr_1ae_5_Rep3
ENSG00000000003	TSPAN6	8.13563	8.19386	8.48042	8.21146	8.33491	8.14748	8.03829	8.23707	8.10753	8.13139	8.4322	8.25047	8.33177	8.23362	8.17787	8.55801	8.74101	8.62299	8.76151	8.62229	8.74652	8.76937	8.48268	8.68204	8.3858	8.62703	8.49755	8.32806	8.71357	8.72128
ENSG00000000005	TNMD	0	0	0	0	0	0	0	0	0	0	0	0	0	0	0	0	0	0	0	0	0	0	0	0	0	0	0	0	0	0
ENSG00000000419	DPM1	9.86472	9.93239	9.9798	10.0491	10.0109	9.979	9.91177	9.87716	9.83468	9.93827	9.89676	9.97366	10.0809	9.87601	9.80343	10.2008	10.4007	10.2903	10.4063	10.2314	10.4206	10.3972	10.1239	10.3545	9.98438	10.2049	10.2894	9.99395	10.3492	10.2797
ENSG00000000457	SCYL3	8.72881	8.76223	9.0173	8.7584	9.06035	8.73074	8.58126	8.84986	8.68929	9.06928	8.56242	8.53754	8.86326	8.61621	8.85332	8.59639	8.74101	8.77135	8.5761	8.9574	8.49594	8.5982	8.77978	8.61602	8.89076	8.4665	8.63346	8.6561	8.57587	9.06957
ENSG00000000460	C1orf112	9.29078	9.32461	9.49342	9.45237	9.43924	9.41638	9.28651	9.22187	9.30105	9.26975	9.38127	9.30759	9.26956	9.21993	9.51973	9.61336	9.68375	9.32537	9.76577	9.46165	9.70555	9.69741	9.38746	9.73419	9.13205	9.63759	9.68476	9.27668	9.66168	9.39903
ENSG00000000938	FGR	1.80516	0	0	0	0	0	1.13836	1.22072	0	0	0	0	0	0	0	0	0	0	0	0	0	0	1.81963	0	0	0	0	0	0	0
ENSG00000000971	CFH	0	1.70583	0	0	0	0	0	0	0	0	0	0	0	0	1.14905	0	1.26553	0	0	0	0	0	0	0	0.713771	1.3299	0	0.983108	0	0
ENSG00000001036	FUCA2	10.4249	10.4995	10.5062	10.5602	10.4218	10.4255	10.5253	10.4966	10.3943	10.6185	10.3984	10.4803	10.5039	10.4271	10.5103	10.5661	10.5992	10.6074	10.562	10.5742	10.5469	10.581	10.6292	10.5413	10.4362	10.5599	10.5659	10.5826	10.5903	10.6124
ENSG00000001084	GCLC	9.04496	8.9521	9.0925	9.03471	9.07977	8.95732	8.88971	9.05867	9.07617	8.99	8.97996	8.84345	9.1618	9.03248	8.977	8.77847	8.68796	8.81336	8.61601	8.89227	8.75107	8.71301	8.75465	8.73588	8.72825	8.70498	8.75766	8.67346	8.65494	8.9669
ENSG00000001167	NFYA	10.4162	10.4408	10.5905	10.4681	10.5044	10.5372	10.3859	10.5294	10.453	10.5047	10.3945	10.3888	10.5016	10.3682	10.4286	10.3984	10.5117	10.3309	10.4351	10.6195	10.4544	10.512	10.4373	10.3796	10.4255	10.3667	10.4619	10.2891	10.4868	10.5207
ENSG00000001460	STPG1	7.64799	7.79156	7.86044	7.8456	7.969	7.84909	7.76312	7.94154	7.86031	7.97048	7.50995	7.67649	8.00073	7.69523	7.83736	7.91297	7.72536	8.04529	7.84912	8.0092	7.68005	7.86868	7.85313	7.84968	7.88991	7.68209	7.72666	7.74096	7.78108	8.04371
ENSG00000001461	NIPAL3	11.2193	11.2504	11.2005	11.2732	11.3161	11.1983	11.2889	11.3285	11.2477	11.3254	11.2468	11.1736	11.1968	11.3022	11.3728	10.9602	10.8956	11.1063	10.9841	11.1306	10.9855	10.9116	11.1385	10.9028	11.1502	10.871	10.9512	11.0895	10.9299	11.1578
ENSG00000001497	LAS1L	10.8235	10.8509	10.5875	10.7185	10.5067	10.7445	10.7533	10.7156	11.0002	10.6517	11.0187	11.1521	10.8915	11.1098	10.8642	10.9546	10.9982	10.8292	11.0201	10.0946	11.1138	11.1323	10.9279	11.138	10.6769	11.2449	11.0615	10.8669	11.2163	10.4641
ENSG00000001561	ENPP4	8.19005	8.21048	8.78594	8.55197	8.5909	8.44864	8.24665	8.63972	8.32605	8.46212	8.17302	8.42435	8.65891	8.22799	8.41765	8.24431	8.52704	8.48984	8.5761	8.95463	8.49594	8.44051	8.48607	8.56793	8.43198	8.06307	8.07478	8.11079	8.24961	9.05125
ENSG00000001617	SEMA3F	9.86085	10.0293	9.83403	9.96553	10.0126	9.91326	9.97857	9.78877	9.95612	10.0633	9.84841	9.97715	9.76304	10.0803	10.0049	9.82408	9.87926	9.83547	9.8085	10.0971	9.79635	9.76439	9.94911	9.86075	10.2093	9.89895	9.87308	10.0928	9.90154	9.96872
ENSG00000001626	CFTR	3.21964	0	1.04708	0.972514	2.20689	0	1.13836	0	1.41715	1.85252	0	2.82682	2.14304	2.5078	2.55354	1.82368	1.92915	0.994993	2.19175	1.54007	1.89221	1.87775	2.12869	1.50454	2.45433	2.25841	0.887572	0.983108	1.7607	0
ENSG00000001629	ANKIB1	10.5088	10.5667	10.6719	10.6143	10.6205	10.5998	10.5498	10.6454	10.5317	10.697	10.548	10.5709	10.645	10.5551	10.6271	10.6562	10.6044	10.5908	10.6786	10.9023	10.5664	10.5998	10.7164	10.4804	10.7628	10.6034	10.529	10.6734	10.6572	10.8393
ENSG00000001630	CYP51A1	7.06662	7.15365	7.23159	7.41242	7.138	6.99806	7.29619	6.89997	6.84045	6.95107	7.15373	7.31716	6.99352	7.24956	7.20087	7.31957	7.36883	7.05613	7.19103	7.23635	7.24334	7.04522	6.86459	6.95539	7.23016	7.34186	7.10706	7.49758	7.40766	7.04506
ENSG00000001631	KRIT1	10.0241	10.2054	10.3476	10.1829	10.318	10.1979	10.0391	10.2335	10.2254	10.1674	10.0576	9.99966	10.2333	9.94281	9.91135	10.1501	10.2239	9.97155	10.2445	10.3213	10.1988	10.2127	10.27	10.1185	9.8941	10.0733	10.0455	9.87294	10.0102	10.3939
ENSG00000002016	RAD52	8.77062	8.76598	8.87054	8.90461	8.77289	8.72528	8.79923	8.83312	8.94784	8.80585	8.89095	8.64248	8.6831	8.73603	8.69701	8.85959	8.57032	8.64463	8.76151	8.71364	8.7166	8.79131	8.75465	8.68527	8.5913	8.73092	8.72904	8.60635	8.76992	8.68741
ENSG00000002079	MYH16	1.41311	1.70583	2.07006	0	1.14117	0	0	0	1.41715	0	0	0	0	1.11894	1.14905	0	0	1.99248	1.75662	0.966461	0	1.22497	0.882294	1.50454	0	0	0	2.77827	0	1.32564
ENSG00000002330	BAD	10.4781	10.3462	10.2675	10.3326	10.382	10.2597	10.4992	10.2493	10.2324	10.2199	10.2517	10.3037	10.1183	10.3319	10.3419	10.0723	10.1914	10.7631	10.1358	10.4528	9.9819	10.2087	10.1616	10.2064	10.521	10.3222	10.3204	10.5687	10.3597	10.2797
ENSG00000002549	LAP3	11.1047	11.0426	11.0548	11.055	11.0608	11.0866	11.0934	11.0611	10.9584	11.098	11.0462	11.0463	11.1043	11.1144	11.1177	11.1947	11.1777	11.1927	11.203	10.9378	11.1405	11.1426	10.9974	11.1017	11.0241	11.2449	11.2333	11.0335	11.3657	11.043
ENSG00000002586	CD99	0	0	0	0	0	0	0	0	0	0	0	0	0	0	0	0	0	0	0	0	0	0	0	0	0	0	0	0	0	0
ENSG00000002587	HS3ST1	8.43503	8.24854	8.50604	8.45244	8.5216	8.29488	8.52121	8.35316	8.28414	8.52142	8.24375	8.0659	8.30604	8.15869	8.5121	8.19515	8.3459	8.69735	8.19782	8.67038	8.29883	8.21557	8.68541	8.30006	8.69966	8.13476	8.2622	8.76375	8.376	8.75437
ENSG00000002726	AOC1	1.41311	2.13528	2.6626	1.5482	1.77027	1.38152	1.13836	2.66049	1.41715	2.9934	1.77272	1.78159	2.14304	0	2.82546	1.18264	1.92915	3.3129	1.75662	3.93646	0	1.58797	2.12869	2.48372	2.07054	1.3299	1.82789	0	2.53038	2.95959
ENSG00000002745	WNT16	0.873071	0	0	0	0	0	0	0	0	0	0	0	0	0	0	0	0	0	0	0	0	0	0	0	0	0	0	0	0	0
ENSG00000002746	HECW1	2.76996	1.09158	0	0	0	0	0	0	0	1.85252	1.14306	0	1.09692	0	1.78047	0	0	0	0	0.966461	0	0.738771	0	0	0	1.3299	1.43302	0	0.844953	0
ENSG00000002822	MAD1L1	8.27383	8.40596	7.95647	8.07912	7.8832	8.28749	8.4387	8.19838	9.05594	7.77794	9.26423	9.18302	9.13866	9.20568	8.55943	8.63377	8.68796	8.48984	8.61601	7.37547	8.92817	8.69682	8.86575	8.93044	8.43732	8.61036	8.49075	8.39657	8.61448	8.09628
ENSG00000002834	LASP1	11.7116	11.6948	11.5785	11.7106	11.8006	11.5706	11.695	11.6341	11.7076	11.881	11.6862	11.7103	11.6113	11.7444	11.862	10.9546	11.1378	11.7668	11.3318	11.836	11.0132	11.1036	11.6816	11.2662	12.0478	11.0257	11.1397	11.7942	11.3327	11.8589
ENSG00000002919	SNX11	9.14583	9.11105	9.1532	9.12201	9.09575	9.10763	9.174	9.09071	9.08951	9.13999	9.08322	8.989	9.07001	9.09255	9.25229	9.07192	9.12529	9.19944	9.16878	9.09966	9.09486	9.17526	9.07647	9.04024	9.26257	9.13413	9.14323	9.13098	9.20699	8.9734
ENSG00000002933	TMEM176A	0.873071	0	0	0.972514	0	0	0	0	0	0	0	0	0	1.11894	0	0	0	0	0	0	0	0	0	0	0	0	0	0.983108	0	0
ENSG00000003056	M6PR	11.0269	11.0333	11.0512	11.0326	10.9683	10.9679	11.0143	10.9354	10.9291	11.002	10.983	11.0645	11.0402	10.9786	10.981	11.1591	11.1751	11.1988	11.2475	11.104	11.1525	11.1587	10.98	11.1509	11.017	11.1472	11.1909	11.0308	11.2139	11.0691
ENSG00000003096	KLHL13	6.619	6.63523	6.44913	6.82762	6.51443	6.8653	6.60147	6.23869	6.47095	6.77879	6.57382	6.9556	6.29371	6.5481	6.4901	6.80067	6.80643	6.95583	6.92056	6.75292	6.91085	7.19101	6.84356	6.96603	6.84468	6.61305	6.876	6.53623	7.09962	7.00332
ENSG00000003137	CYP26B1	3.99711	4.62951	4.2576	4.64711	3.95113	3.17426	4.05459	3.36658	3.75802	4.39369	4.7859	2.82682	4.08284	4.46557	4.35635	4.13001	4.55253	3.79804	3.93304	4.57876	4.11038	3.62864	4.15915	4.27601	4.24202	4.37018	3.24802	4.66778	3.93845	3.7871
ENSG00000003147	ICA1	10.3228	10.3919	10.5944	10.3666	10.4319	10.3369	10.3846	10.6273	10.3386	10.5313	10.3036	10.3835	10.5385	10.3081	10.5342	10.1142	10.1492	10.5243	10.145	10.5886	10.114	10.1436	10.4788	10.1161	10.5728	10.1512	10.1752	10.3934	10.2602	10.5672
ENSG00000003249	DBNDD1	10.6766	10.6864	10.4078	10.5638	10.5745	10.4977	10.6949	10.4602	10.6489	10.7307	10.7014	10.6018	10.4068	10.657	10.7637	10.0909	10.0872	10.6338	10.2274	10.4636	10.0163	10.1857	10.4249	10.1746	10.6305	10.1779	10.1847	10.609	10.2135	10.4385
ENSG00000003393	ALS2	9.97014	10.0829	10.1573	10.0187	10.0976	10.022	9.91177	10.1732	9.96458	10.1542	10.0177	9.88901	10.1762	10.023	10.088	9.86394	9.92582	9.91182	9.81042	10.0857	9.95357	9.81989	10.0035	9.89456	10.1593	9.76229	9.85068	10.0388	9.85393	10.0427
ENSG00000003400	CASP10	5.02676	5.45881	4.41011	5.4376	4.90372	5.18266	4.95572	5.44559	5.30097	5.50437	5.35332	5.36554	4.70362	4.6786	5.22999	4.23103	4.55253	5.34777	4.56078	5.25579	4.46063	5.13366	4.71694	4.58297	5.32356	4.82015	5.05755	5.42623	5.20278	5.02837
ENSG00000003402	CFLAR	10.8729	10.9777	10.9553	10.9466	10.9752	10.954	10.971	10.9978	11.0573	10.9761	10.9941	10.8845	10.9325	10.9239	10.9251	10.8192	10.7805	10.6921	10.7501	10.729	10.7706	10.81	10.9379	10.6615	10.7923	10.7627	10.7798	10.7605	10.6812	10.7855
ENSG00000003436	TFPI	10.4981	10.5933	10.5825	10.6178	10.579	10.695	10.5931	10.6478	10.5446	10.4768	10.5209	10.6142	10.6644	10.4659	10.3859	10.921	11.0354	10.4788	10.9636	10.5386	11.0372	11.078	10.6887	11.0108	10.0668	10.8734	10.8217	10.3871	10.728	10.6494
ENSG00000003509	NDUFAF7	8.43503	8.59928	8.49329	8.66573	8.3878	8.73074	8.57673	8.51409	8.58331	8.51456	8.31117	8.50886	8.45395	8.60756	8.60526	8.25034	8.46534	8.59362	8.4928	8.49836	8.46859	8.56292	8.49958	8.46292	8.13626	8.51208	8.49416	8.32367	8.4954	8.49602
ENSG00000003756	RBM5	11.6299	11.6488	11.5521	11.6332	11.5751	11.7588	11.5637	11.5617	11.7062	11.5701	11.6146	11.5454	11.4988	11.5719	11.5497	11.5758	11.3994	11.378	11.4308	11.5367	11.4681	11.4929	11.4948	11.4901	11.5592	11.5213	11.4757	11.4483	11.5113	11.5972
ENSG00000003987	MTMR7	0.873071	0	0	0	0	0	0	1.22072	1.41715	0	0	0	0	0	0	1.18264	0	0	0	0	0	1.22497	0	0	0	0	0	0	0	0
ENSG00000003989	SLC7A2	10.6773	10.7293	10.812	10.7332	10.8019	10.6525	10.6791	10.8276	10.7012	10.6509	10.7191	10.6875	10.7931	10.6476	10.5934	10.9314	10.886	10.5982	10.875	10.8285	10.938	10.8387	10.8536	10.8391	10.5831	10.7715	10.8006	10.6393	10.7602	10.7455
ENSG00000004059	ARF5	11.145	11.0129	10.9452	10.9786	10.9314	10.9399	11.0417	10.9732	10.8775	10.9636	10.873	10.9791	10.8414	10.9761	10.9844	10.8885	10.9843	11.2515	10.886	10.9949	10.8038	10.8617	10.6498	10.8275	11.0917	10.9631	10.9519	11.1546	10.9899	10.8819
ENSG00000004139	SARM1	7.75182	7.82072	7.75044	7.77763	7.68616	7.70113	7.81021	7.70444	7.53604	7.95538	7.80323	7.77613	7.89425	7.76684	8.01084	8.16992	7.94678	8.13466	7.86392	8.02514	7.89254	7.98368	8.14294	7.87248	8.12638	7.96596	7.96126	8.09026	8.0122	7.87807
ENSG00000004142	POLDIP2	11.7276	11.6844	11.6152	11.747	11.6095	11.6434	11.8037	11.6341	11.6027	11.654	11.6422	11.7045	11.5436	11.737	11.7265	11.6922	11.5941	11.8634	11.7437	11.6226	11.6484	11.6821	11.5409	11.6862	11.6065	11.6762	11.7908	11.7104	11.7967	11.4218
ENSG00000004399	PLXND1	5.46731	4.92638	5.08986	5.03362	5.21598	5.11744	4.33778	4.98205	5.13942	4.97569	4.06266	5.03098	4.93609	5.0286	4.43967	4.65124	4.71561	4.38276	5.1496	4.39471	4.41551	3.9111	4.93148	4.88161	4.46746	5.03523	4.77357	4.35997	4.21074	4.25379
ENSG00000004455	AK2	12.3653	12.305	12.2487	12.3043	12.2224	12.3723	12.3045	12.2614	12.2462	12.2145	12.2378	12.3077	12.1951	12.3728	12.2185	12.5177	12.581	12.5627	12.5201	12.2952	12.5483	12.542	12.333	12.5197	12.3054	12.5671	12.5762	12.4576	12.6376	12.2628
ENSG00000004468	CD38	2.11311	0	0	0.972514	1.77027	0	1.76665	1.22072	0.876006	0.903374	1.77272	2.55485	1.71279	0	1.14905	0	0	0	0	0	1.89221	1.22497	0.882294	0.940111	2.75719	0	0	0	0.844953	2.00464
ENSG00000004478	FKBP4	13.8419	13.7785	13.5227	13.7606	13.6148	13.7528	13.8734	13.589	13.7192	13.681	13.7735	13.8694	13.5903	13.8455	13.7433	13.9552	13.8961	13.9308	13.9955	13.4478	13.9301	13.923	13.6876	13.952	13.6558	14.001	14.021	13.8703	14.0484	13.5395
ENSG00000004487	KDM1A	11.7166	11.7037	11.5835	11.6885	11.5364	11.6904	11.7438	11.6378	11.6708	11.566	11.7119	11.6645	11.6186	11.6712	11.6602	11.9478	11.9069	11.693	11.9429	11.649	11.892	11.9022	11.7247	11.8913	11.5608	11.952	11.9419	11.8092	11.9354	11.5603
ENSG00000004534	RBM6	10.9294	10.9842	10.8163	10.8552	10.799	10.9375	10.8938	10.9636	11.0936	10.8306	11.0462	11.0135	10.9249	11.0584	10.8567	11.0152	10.7667	10.6869	10.9049	10.6204	10.8985	10.8849	10.9557	10.8557	10.854	10.9158	10.9764	10.787	10.9533	10.7512
ENSG00000004660	CAMKK1	10.2439	10.2027	10.0713	10.238	10.0426	10.0937	10.1607	10.2191	10.3479	10.2635	10.2631	10.3148	10.1094	10.2426	10.2811	10.2811	10.2324	10.1896	10.0862	9.83758	10.154	10.2576	10.2168	10.2386	10.1825	10.216	10.2577	10.3025	10.2385	9.98703
ENSG00000004700	RECQL	9.94845	10.012	10.3393	10.1661	10.1943	10.2483	9.85114	10.0555	10.0363	10.1487	9.92753	10.1372	10.1762	10.0279	10.0387	10.4253	10.4052	10.0026	10.4189	10.2996	10.3631	10.395	10.1141	10.2593	10.0034	10.2656	10.3156	9.81154	10.3483	10.27
ENSG00000004766	VPS50	8.55471	8.56952	8.7929	8.69617	8.81598	8.91955	8.53061	8.63972	8.7798	8.67371	8.66906	8.58411	8.83115	8.60756	8.82648	8.98782	9.01606	8.59362	9.02794	8.98754	8.99103	9.00732	8.88389	9.08973	8.74126	8.88899	8.82681	8.62074	8.92212	9.30939
ENSG00000004776	HSPB6	3.343	3.62185	3.78619	3.64928	3.83406	4.09205	3.40742	3.36658	2.94154	2.9934	3.57002	3.72139	2.74306	1.74147	3.58004	3.90391	3.7695	3.3129	4.23595	4.45871	3.64687	3.46353	4.57102	3.79301	4.33647	4.01244	3.78145	5.09628	3.16383	4.51371
ENSG00000004777	ARHGAP33	8.43156	8.40596	8.46744	8.35405	8.45872	8.37381	8.36702	8.47145	8.49922	8.37023	8.73192	8.67296	8.56224	8.44728	8.60074	8.32079	8.36445	8.33873	8.37885	8.69716	8.39785	8.34879	8.65253	8.40154	8.8573	8.61872	8.58318	8.78946	8.63774	8.38987
ENSG00000004779	NDUFAB1	11.333	11.3625	11.3376	11.3968	11.1855	11.4574	11.3279	11.3075	11.2864	11.2837	11.3539	11.4039	11.4386	11.4241	11.3501	11.6495	11.6297	11.6843	11.6302	11.5143	11.6407	11.6476	11.2987	11.6208	11.4002	11.6701	11.6391	11.4306	11.7215	11.5899
ENSG00000004799	PDK4	2.11311	0	0	0	0	0	0	0	0	0	0	0	0	0	1.14905	0	1.26553	0.994993	0	0	0.74675	0	0	0	0	0	0	0.983108	0	0
ENSG00000004809	SLC22A16	2.5824	1.09158	2.07006	0.972514	1.14117	1.38152	1.13836	2.31958	1.41715	2.16406	2.54447	1.14992	1.09692	1.11894	1.78047	1.82368	1.92915	2.31391	1.13062	2.26789	0.74675	2.11895	0.882294	0	0	1.3299	0	0.983108	0.844953	1.32564
ENSG00000004838	ZMYND10	5.73845	6.03279	5.58253	6.07459	5.58551	5.75432	5.98796	5.92785	6.02939	5.97271	5.47591	5.7718	5.99194	5.92519	6.18673	5.33511	6.18214	6.09864	5.9183	5.93321	5.90657	6.0561	5.90764	5.76243	6.10537	5.99605	5.70054	6.32399	5.92399	5.97187
ENSG00000004846	ABCB5	4.20654	3.15665	3.4056	3.40906	4.50466	2.54009	3.03701	3.54164	1.41715	2.9934	3.04455	2.82682	4.08284	3.37504	3.05417	2.60399	3.23648	3.79804	2.79652	3.10975	2.68349	3.7046	3.10261	3.47319	3.00736	2.65501	2.60889	3.29138	2.31644	3.70615
ENSG00000004848	ARX	5.54645	5.42122	4.67389	5.19391	5.65619	4.90195	5.0633	5.04155	5.38988	5.78049	5.31003	4.66564	5.08875	4.86419	5.56291	4.02138	3.91088	5.07773	5.10042	5.06339	4.62821	4.09171	4.71694	4.27601	5.17811	4.07857	4.36116	5.05449	4.14733	5.12495
ENSG00000004864	SLC25A13	10.5072	10.4664	10.5335	10.5379	10.548	10.5574	10.4579	10.4738	10.4505	10.5012	10.5445	10.6153	10.5118	10.595	10.5968	10.8253	10.7061	10.4256	10.6786	10.422	10.7041	10.6701	10.4125	10.6318	10.1754	10.6672	10.5899	10.4121	10.6728	10.4203
ENSG00000004866	ST7	12.22	12.2128	12.4573	12.2791	12.3502	12.2578	12.25	12.4194	12.1656	12.33	12.1485	12.25	12.3564	12.2086	12.3322	12.3904	12.4387	12.5681	12.5801	12.5694	12.4414	12.4824	12.4844	12.5312	12.4892	12.3831	12.5803	12.4669	12.5983	12.4271
ENSG00000004897	CDC27	11.2268	11.2504	11.36	11.4131	11.2948	11.4425	11.1923	11.1184	11.2767	11.2977	11.2504	11.2757	11.3118	11.1952	11.1819	11.5961	11.6525	11.2943	11.6281	11.6317	11.7324	11.7172	11.4685	11.6782	11.191	11.4387	11.4618	11.0274	11.5421	11.6794
ENSG00000004939	SLC4A1	2.36675	1.70583	2.39654	0	1.77027	0	2.80871	1.87233	0.876006	0.903374	1.77272	1.78159	1.09692	0	2.21818	1.18264	2.38197	1.57828	0	0.966461	0.74675	2.11895	0.882294	0	1.5461	0	0	0.983108	1.7607	2.25281
ENSG00000004948	CALCR	1.41311	0	0	0	0	0	0	0	0	0.903374	0	0	0	0	0	0	0	0	0	0	0	0	0	0	0	0	0	0	0	0
ENSG00000004961	HCCS	8.93895	8.90182	8.88689	8.99172	8.81983	8.97584	9.02227	8.83312	8.76879	8.82813	8.93079	9.13691	8.85973	9.03892	8.68426	8.8985	8.82381	9.10112	9.14169	8.73318	9.00823	8.98273	8.64951	8.91404	8.72825	8.95209	9.00923	8.76699	9.12501	8.72642
ENSG00000004975	DVL2	10.8588	10.9696	10.949	10.8087	10.888	10.8537	10.9422	10.9107	10.8339	10.9736	10.9033	10.8929	10.9181	10.9659	10.917	10.9426	10.9104	11.0005	10.9602	10.8599	10.8384	10.8265	10.9354	10.8121	11.0166	10.905	10.9568	10.8975	10.9978	10.7762
ENSG00000005001	PRSS22	4.82992	4.33831	4.99657	5.40521	4.84442	4.90195	5.0633	4.64104	4.65669	4.76091	4.84775	4.79797	4.63914	4.61103	4.66412	4.91686	4.36864	4.8483	4.14187	4.84133	4.41551	4.2522	4.84945	4.13226	5.45568	4.37018	4.41964	5.42623	4.38579	5.24443
ENSG00000005007	UPF1	11.9881	12.0271	11.6182	11.883	11.7342	11.8023	11.9563	11.8091	12.1097	11.8743	12.2611	12.128	11.9538	12.2039	12.0077	12.1423	12.1743	11.8569	12.0185	11.3282	12.1883	12.0644	12.0268	12.1187	11.9421	12.2112	12.1695	11.9884	12.1233	11.6883
ENSG00000005020	SKAP2	10.2329	10.2965	10.3757	10.3454	10.349	10.3441	10.306	10.3905	10.2314	10.4671	10.3323	10.1403	10.3934	10.2073	10.3687	10.3402	10.3826	10.1749	10.3717	10.7298	10.38	10.3756	10.4668	10.4003	10.5185	10.2351	10.3079	10.2281	10.3788	10.775
ENSG00000005022	SLC25A5	13.4169	13.3917	13.4285	13.4351	13.4009	13.4288	13.4436	13.3834	13.248	13.4144	13.3497	13.4318	13.4291	13.4113	13.4853	13.6951	13.7595	13.785	13.7867	13.5312	13.7015	13.7492	13.4431	13.7565	13.4489	13.7621	13.7409	13.5902	13.7679	13.5419
ENSG00000005059	MCUB	4.55164	4.33831	3.25259	3.53416	4.84442	4.64854	4.15529	5.04155	4.50573	4.50848	4.25756	4.35786	3.63107	3.79604	4.07295	4.23103	5.28215	4.57535	5.45362	4.93429	4.5881	4.2522	4.2893	5.01055	4.6984	4.2605	4.23659	4.42701	4.54187	4.85146
ENSG00000005073	HOXA11	1.80516	0	2.07006	0	1.14117	0	2.53736	1.87233	1.41715	1.45463	1.14306	3.05556	1.71279	1.11894	3.71993	2.26596	1.92915	2.31391	2.79652	2.74937	2.34143	2.66676	1.42579	0	1.83202	0.813057	1.43302	0	1.7607	1.32564
ENSG00000005075	POLR2J	9.97134	9.91221	9.91435	9.9389	9.88598	9.94885	10.0457	10.006	9.81207	9.8661	9.88575	9.95251	9.75546	10.0067	10.0101	9.95351	9.93619	10.3694	10.0526	9.99424	9.84289	9.98797	9.74165	9.88338	10.0061	10.0924	10.1763	10.208	10.1603	9.92467
ENSG00000005100	DHX33	10.9441	10.9874	10.8112	10.9289	10.8394	10.8207	10.8653	10.8286	10.8749	10.8774	10.896	10.8873	10.7866	10.9643	10.8538	11.0579	11.0459	10.5955	10.9559	10.5814	11.0502	10.9384	10.7236	10.9296	10.5121	10.9843	10.9537	10.758	10.9608	10.5155
ENSG00000005102	MEOX1	0.873071	0	0	0	0	0	0	0	0.876006	0	0	0	0	0	0	0	0	0	0	0	0	0	0	0	0	0	0	0	0	0
ENSG00000005108	THSD7A	3.75204	4.16721	2.88715	4.26925	3.56686	3.79112	3.70189	3.83857	4.07643	2.9934	3.83727	3.42655	4.42637	3.79604	3.84745	4.49751	3.00374	2.31391	3.02453	3.39786	3.08033	2.94252	2.95353	2.48372	2.61369	3.87034	3.24802	3.42857	2.53038	2.95959
ENSG00000005156	LIG3	11.1857	11.1412	11.0278	11.0589	11.0195	11.0993	11.1759	11.1158	11.136	11.1381	11.1225	11.1675	11.0968	11.1557	11.1326	11.3226	11.292	11.0453	11.2601	11.0504	11.2388	11.2391	11.1046	11.25	11.1305	11.3398	11.3169	11.1639	11.3246	11.0213
ENSG00000005175	RPAP3	9.71146	9.90542	10.0584	10.1319	9.9401	10.022	9.7898	9.93125	9.98137	9.9649	9.90406	9.99794	10.2401	9.81163	9.84413	10.1404	10.3269	9.96869	10.2932	10.2743	10.3586	10.2505	10.1305	10.2209	9.88339	10.1073	10.0043	9.74413	10.0756	10.3463
ENSG00000005187	ACSM3	9.44676	9.36476	9.49342	9.33475	9.33268	9.49231	9.29757	9.45308	9.37914	9.41479	9.32801	9.4577	9.53398	9.43058	9.33622	9.83615	9.72742	9.43707	9.71767	9.56339	9.7207	9.84528	9.28976	9.59031	9.35149	9.78227	9.90669	9.33675	9.87365	9.51348
ENSG00000005189	REXO5	9.71859	9.72051	9.56625	9.70943	9.75321	9.72631	9.70097	9.62582	9.65801	9.60095	9.72405	9.62294	9.58622	9.72638	9.54111	10.1159	9.92165	9.66594	9.99831	9.49064	10.0106	10.0292	9.68661	9.85073	9.49661	10.0944	9.95073	9.63671	9.96038	9.44497
ENSG00000005194	CIAPIN1	11.108	11.1032	10.9553	11.1405	10.9062	11.0641	11.0368	10.9442	11.0172	10.9458	11.1664	11.0488	10.8689	11.1167	11.0547	11.1774	11.1233	11.0854	11.1624	10.8488	11.0488	11.1721	10.8588	11.1161	10.8797	11.2057	11.246	11.0953	11.2345	10.8208
ENSG00000005206	SPPL2B	10.2557	10.2151	10.0248	10.0465	10.1658	10.1416	10.1877	10.2207	10.3681	10.1208	10.4591	10.2541	10.1533	10.391	10.3021	10.0976	10.229	10.1089	10.1128	9.90517	10.1677	10.0719	10.3579	10.1597	10.2394	10.2937	10.1973	10.3324	10.2461	10.0458
ENSG00000005238	FAM214B	9.30792	9.40624	9.13416	9.171	9.10209	9.12433	9.32215	9.2122	9.02389	9.23683	9.20343	9.36206	9.15317	9.21424	9.30601	8.83973	8.88936	9.18966	8.75358	9.03554	8.88123	8.89628	9.01431	8.90301	9.19957	8.94988	8.81868	9.05354	8.84927	8.99699
ENSG00000005243	COPZ2	3.21964	2.4658	2.07006	3.40906	3.23866	1.38152	2.53736	2.66049	2.37196	0.903374	2.81607	1.78159	2.96972	2.17493	3.05417	2.26596	1.92915	2.99123	2.52559	1.54007	2.82824	2.66676	2.12869	1.90921	2.61369	0.813057	2.3924	2.5567	3.0296	3.43188
ENSG00000005249	PRKAR2B	9.2831	9.36476	9.5904	9.49916	9.65739	9.49231	9.45895	9.50948	9.30677	9.51431	9.38388	9.32415	9.56033	9.29451	9.46111	9.54142	9.61049	9.75153	9.67422	9.99828	9.63595	9.65854	9.75157	9.71854	9.87161	9.47524	9.47502	9.73424	9.71732	10.1537
ENSG00000005302	MSL3	9.33418	9.31695	9.49555	9.4779	9.41651	9.47939	9.27816	9.44208	9.31626	9.44032	9.21814	9.45269	9.50034	9.37055	9.30879	9.50406	9.54421	9.51941	9.51446	9.62046	9.40873	9.4863	9.36365	9.58168	9.36835	9.49958	9.53742	9.38392	9.56793	9.65094
ENSG00000005339	CREBBP	12.2651	12.2734	12.2389	12.1975	12.2707	12.1881	12.2726	12.261	12.3038	12.3315	12.3636	12.2362	12.2416	12.335	12.3377	12.1771	12.0853	11.9347	12.0761	12.1349	12.1028	12.0279	12.1593	12.1047	12.217	12.1779	12.113	12.0885	12.0812	12.0422
ENSG00000005379	TSPOAP1	6.22898	6.89035	6.32029	6.45291	5.99301	6.34467	6.58351	6.51542	7.03678	6.37192	6.74613	6.80646	6.92756	6.7657	6.32462	5.98244	5.76442	5.96741	5.9464	6.14252	6.23995	6.0561	6.88532	6.20115	6.74489	6.02987	5.79191	6.79921	5.96134	6.58355
ENSG00000005381	MPO	0	0	1.04708	0	0	0	0	0	0	0.903374	0	1.14992	0	0	0	0	0	0	0	0.966461	0	0	0	0.940111	0	0	0.887572	0	0	0.81001
ENSG00000005421	PON1	1.80516	1.09158	1.04708	0	1.14117	0	0	0	0	0	0	1.14992	0	0	0	0	0	0	0	0.966461	0	0	0	0	0	0.813057	0	0	0	0
ENSG00000005436	GCFC2	9.41548	9.41821	9.62588	9.57938	9.41651	9.62729	9.36483	9.43655	9.43243	9.31777	9.54892	9.52608	9.52954	9.43058	9.18447	9.75367	9.93205	9.48584	9.72782	9.64301	9.94268	9.94653	9.55371	9.86502	9.16621	9.65666	9.78547	9.38603	9.63303	9.77271
ENSG00000005448	WDR54	8.64738	8.63255	8.65468	8.57763	8.5216	8.4083	8.61702	8.59574	8.45183	8.43334	8.47693	8.59324	8.38189	8.56356	8.69277	8.77429	8.783	8.95577	8.82343	8.60825	8.62543	8.7084	8.52952	8.656	8.62678	8.86577	8.84559	8.91737	8.91738	8.5665
ENSG00000005469	CROT	10.1498	10.3081	10.0855	10.2483	9.78511	10.3879	10.1622	9.92336	10.1167	9.6903	10.3214	10.2798	9.97053	10.1697	9.48092	10.2347	10.2324	9.71449	10.0735	9.35219	10.3623	10.2888	9.88107	10.1929	9.02976	10.2576	10.1441	9.66302	10.0509	9.35158
ENSG00000005471	ABCB4	1.80516	1.70583	1.6474	2.2777	1.77027	0	2.20287	2.31958	1.41715	1.85252	1.14306	1.14992	1.71279	1.74147	2.55354	1.82368	1.92915	2.57661	3.22136	1.54007	2.52257	2.66676	1.81963	3.21227	1.83202	0	2.3924	1.5624	2.71665	1.32564
ENSG00000005483	KMT2E	11.6016	11.6065	11.5895	11.6072	11.6817	11.5918	11.5614	11.6042	11.6223	11.6817	11.6163	11.5951	11.5611	11.5934	11.5613	11.6149	11.5366	11.4566	11.5558	11.6816	11.594	11.5279	11.6794	11.5143	11.6248	11.468	11.5548	11.3996	11.5156	11.6814
ENSG00000005486	RHBDD2	9.09188	8.99751	8.98427	8.99445	8.80824	8.75775	8.82621	8.73291	8.76603	9.09017	9.00732	9.04001	8.77224	8.93567	9.1322	8.81147	8.89787	9.33428	8.84971	9.08199	8.75107	8.68515	9.05833	8.8835	9.25503	8.97397	9.10142	9.24684	9.05115	9.0202
ENSG00000005513	SOX8	8.65335	8.80298	8.73269	8.68946	8.54972	8.60552	8.84518	8.65409	8.78528	8.70414	8.96608	8.8164	8.57091	8.96642	8.84188	8.2076	8.52704	8.86035	8.35808	8.69716	8.32652	8.41247	8.58126	8.27032	8.92726	8.33403	8.4736	8.6769	8.46971	8.70574
ENSG00000005700	IBTK	10.4345	10.5688	10.6337	10.6099	10.6238	10.6381	10.4604	10.5691	10.5103	10.559	10.5514	10.4962	10.7297	10.5244	10.5067	10.5948	10.6804	10.3994	10.6628	10.8864	10.6679	10.6553	10.8102	10.6615	10.4937	10.488	10.4267	10.3269	10.3865	10.9401
ENSG00000005801	ZNF195	10.5701	10.6164	10.7948	10.7152	10.5596	10.7268	10.5987	10.6466	10.6376	10.6081	10.5994	10.5904	10.616	10.5083	10.5554	10.6357	10.6353	10.5175	10.6754	10.8148	10.6208	10.7196	10.7358	10.609	10.6564	10.585	10.6515	10.5321	10.5925	10.822
ENSG00000005810	MYCBP2	14.423	14.467	14.4789	14.454	14.4278	14.4983	14.4219	14.5043	14.5319	14.4739	14.5062	14.5003	14.5091	14.4984	14.3937	14.5984	14.5047	14.2854	14.4673	14.2227	14.5357	14.5301	14.6458	14.442	14.2067	14.4787	14.5	14.4352	14.3853	14.3085
ENSG00000005812	FBXL3	10.0939	10.1023	10.2154	10.1552	10.1165	10.2747	10.0636	10.1832	9.99442	10.1342	10.1074	10.0831	10.2563	10.044	9.96858	10.1915	10.4037	10.0906	10.3678	10.2496	10.4141	10.3125	10.1827	10.2998	9.9989	10.1502	10.1201	9.95757	10.2232	10.418
ENSG00000005844	ITGAL	2.5824	1.70583	1.6474	2.75991	1.77027	0	2.53736	1.22072	2.58778	0.903374	2.20959	0	1.09692	2.5078	2.21818	1.18264	0	1.57828	1.75662	1.54007	2.68349	2.11895	2.38309	1.50454	1.18914	2.00996	2.13758	1.5624	1.7607	0
ENSG00000005882	PDK2	9.68109	9.64099	9.63945	9.71274	9.60921	9.69592	9.75813	9.69924	9.63243	9.84713	9.67584	9.60046	9.59262	9.72238	9.80146	9.50658	9.57109	9.82445	9.65093	9.81484	9.4116	9.43286	9.70276	9.44575	9.94464	9.55435	9.5813	9.88938	9.60381	9.78138
ENSG00000005884	ITGA3	8.62932	8.56952	8.58828	8.79324	8.87274	8.60552	8.81086	8.66359	8.76326	8.74861	8.68186	8.69435	8.63844	8.66284	8.78327	7.97981	8.18815	8.62299	8.21525	8.7809	8.16551	8.00261	8.71466	8.34966	9.06983	8.05488	8.201	8.70419	8.40001	8.77931
ENSG00000005889	ZFX	10.917	10.9631	11.0373	10.9501	10.917	10.8944	10.9501	10.9789	10.9669	10.8821	10.9097	10.9869	10.9942	10.9257	10.7947	10.9938	10.9529	10.6808	10.9394	10.7894	10.9851	11.055	10.879	10.8377	10.6803	11.0184	10.9256	10.7466	10.9068	10.8767
ENSG00000005893	LAMP2	12.0951	12.1868	12.423	12.2999	12.4374	12.3089	12.2187	12.3042	12.2337	12.3472	12.2425	12.2348	12.4192	12.2435	12.3161	12.1572	12.2382	12.3533	12.3375	12.576	12.3269	12.2679	12.3976	12.2729	12.3108	12.0059	12.1202	12.1864	12.1356	12.7433
ENSG00000005961	ITGA2B	2.93592	2.4658	1.04708	1.5482	2.81311	0	3.03701	2.31958	0	2.42012	1.77272	3.25295	2.47402	2.5078	2.55354	1.82368	1.92915	2.31391	0	2.52862	1.89221	2.32554	3.36126	1.50454	3.11787	2.00996	1.82789	1.5624	2.31644	2.64906
ENSG00000005981	ASB4	0	0	0	0	0	0	1.13836	0	0	0	0	0	0	0	0	0	0	0	0	0	0	0	0	0	0	0	0	0	0	0
ENSG00000006007	GDE1	11.6158	11.6247	11.584	11.6423	11.636	11.5155	11.6401	11.5756	11.5271	11.738	11.6274	11.509	11.5102	11.6	11.6897	11.4937	11.4509	11.5541	11.5929	11.6369	11.3912	11.478	11.4111	11.472	11.5562	11.4257	11.4966	11.5307	11.5058	11.6513
ENSG00000006015	REX1BD	9.48074	9.55899	9.33808	9.35397	9.39083	9.34694	9.47852	9.42822	9.29339	9.31974	9.38127	9.39378	9.29594	9.28642	9.31155	9.33281	9.24363	9.70594	9.27509	9.3224	9.21	9.2814	9.10105	9.32902	9.47341	9.50711	9.38067	9.77018	9.30286	9.12706
ENSG00000006016	CRLF1	2.5824	1.09158	2.6626	1.5482	2.20689	4.09205	3.03701	2.66049	3.09044	1.45463	2.20959	3.05556	2.14304	2.5078	3.58004	3.1076	4.55253	2.57661	2.79652	3.6379	3.39123	3.46353	3.23772	2.70311	3.2205	2.25841	3.68939	3.42857	3.69411	3.52921
ENSG00000006025	OSBPL7	3.45663	1.70583	2.6626	3.40906	2.81311	3.94942	3.94633	1.87233	2.77547	2.42012	2.54447	3.72139	2.96972	2.77808	1.78047	2.26596	3.00374	1.99248	3.02453	1.9494	2.52257	1.58797	2.59928	1.50454	2.75719	2.65501	1.82789	2.97031	2.8816	3.09292
ENSG00000006042	TMEM98	10.438	10.4443	10.4935	10.5528	10.563	10.6072	10.5567	10.4657	10.3744	10.4211	10.4061	10.4704	10.4462	10.4954	10.533	10.397	10.4623	10.7272	10.4645	10.6745	10.3039	10.484	10.4	10.4636	10.6421	10.3978	10.4662	10.6314	10.5208	10.6655
ENSG00000006047	YBX2	5.84664	5.42122	5.70555	5.80345	5.93734	5.47074	5.98796	5.72504	6.18655	5.58507	6.15162	5.2776	5.31198	5.35205	5.27606	5.19209	5.8721	5.41647	5.19715	5.54825	5.45004	5.78579	5.51397	5.52404	5.85718	6.24671	5.95894	5.84924	5.60799	5.45726
ENSG00000006059	KRT33A	0	0	0	0	0	0	0	0	0	0	0	0	0	0	0	0	0	0	0	0	0	0	0	0	0	0	0	0	0	0
ENSG00000006062	MAP3K14	8.91926	8.84262	8.68115	8.74228	8.68688	8.79993	8.90425	8.90296	9.0029	9.01691	8.94501	8.76073	8.90499	8.84299	9.01145	8.39886	8.41874	8.64104	8.3423	8.34172	8.47135	8.45982	8.70011	8.38577	8.49733	8.63803	8.62727	8.44993	8.57887	8.47174
ENSG00000006071	ABCC8	6.11244	5.92949	5.9491	6.01143	5.90867	5.87762	6.2149	6.21304	5.74478	5.63646	5.62467	5.7718	5.8567	5.71596	5.92283	5.82975	5.76442	6.11939	5.8604	6.40864	5.49411	5.559	6.20015	5.52404	6.11872	5.73412	5.76961	6.09579	5.69925	5.78743
ENSG00000006116	CACNG3	0	0	0	0	0	0	0	0	0	0	0	0	0	0	0	0	0	0	0	0	0	0	0	0	0	0	0	0	0	0
ENSG00000006118	TMEM132A	11.9798	12.0675	11.7682	11.7857	11.7255	11.8576	12.0282	11.9277	12.1479	11.8962	12.1365	12.1327	12.0174	12.2	12.0352	11.6772	11.7381	12.0651	11.7255	11.4547	11.7976	11.7576	12.0471	11.8913	12.1226	11.7566	11.7137	12.1151	11.8844	11.8424
ENSG00000006125	AP2B1	12.5451	12.5694	12.6347	12.5292	12.5726	12.4906	12.5051	12.6357	12.4561	12.6371	12.5429	12.5577	12.6134	12.5772	12.6721	12.7132	12.6548	12.6442	12.6137	12.6423	12.635	12.6094	12.6337	12.5895	12.6398	12.6398	12.6318	12.5979	12.6278	12.5903
ENSG00000006128	TAC1	0.873071	0	0	0	0	0	0	0	0	0	0	0	0	0	0	0	0	0	0	0	0	0	0	0	0	0	0	0	0	0.81001
ENSG00000006194	ZNF263	10.686	10.6913	10.7183	10.7119	10.6249	10.7062	10.7146	10.7606	10.627	10.678	10.718	10.5859	10.5702	10.6932	10.7092	10.6089	10.5405	10.6093	10.6078	10.4829	10.539	10.5998	10.5008	10.5554	10.6164	10.6394	10.6377	10.6923	10.7301	10.573
ENSG00000006210	CX3CL1	2.11311	0	0	0.972514	0	0	0	0	0	0	0	0	0	0	0	0	0	0	0	0	0	0	0	0	0	0.813057	0	0	0	0
ENSG00000006282	SPATA20	12.0274	11.9582	11.9572	11.9862	11.9775	11.9115	11.958	11.9899	11.893	11.9934	11.8726	11.8809	11.8636	11.9244	12.0264	11.7316	11.7214	12.1683	11.7768	12.0482	11.6966	11.7692	12.0393	11.8791	12.2945	11.8352	11.8604	12.2655	11.9177	12.0965
ENSG00000006283	CACNA1G	5.02676	3.86522	5.21939	4.80442	5.51118	5.18266	5.16342	5.86336	5.27008	5.50437	4.50797	4.35786	4.50083	5.17617	5.52527	3.90391	4.36864	5.11954	4.23595	5.29137	4.11038	3.97385	4.62132	4.20593	5.72375	4.20237	4.23659	4.42701	5.29344	5.06128
ENSG00000006327	TNFRSF12A	8.34566	8.48551	8.3824	8.28896	8.41862	8.61146	8.59925	8.29322	8.37768	8.40399	8.34909	8.40373	8.22598	8.347	8.44311	7.30806	7.53095	8.58618	7.70028	8.12219	7.38467	7.47209	7.85313	7.79702	8.18784	7.64438	7.87508	8.18045	7.64996	7.9589
ENSG00000006377	DLX6	0.873071	0	0	0	0	0	0	0	0	0	0	0	0	0	0	0	0	0	0	0	0	0	0	0	0	0	0	0	0	0
ENSG00000006432	MAP3K9	10.1863	10.1943	10.007	10.0687	10.0042	10.17	10.0652	10.2174	10.3853	10.0992	10.4087	10.2469	10.2882	10.2839	10.1757	9.9461	9.87495	9.7482	9.81233	9.65672	10.0407	9.85573	10.0661	10.0663	9.98165	9.8689	9.94577	9.94476	9.90034	9.95783
ENSG00000006451	RALA	9.77034	9.73398	9.71461	9.79318	9.78116	9.85943	9.83415	9.65944	9.72077	9.74985	9.62817	9.70741	9.74783	9.61867	9.65444	9.83013	9.96486	9.94563	9.94011	10.055	9.9925	9.89679	9.82985	9.84642	9.77584	9.81416	9.78964	9.63848	9.93126	9.95345
ENSG00000006453	BAIAP2L1	11.3496	11.3859	11.4655	11.406	11.4295	11.2936	11.3619	11.446	11.2955	11.4688	11.3351	11.3664	11.3519	11.3747	11.4831	11.3132	11.3714	11.3946	11.3049	11.3532	11.2561	11.2816	11.3387	11.2516	11.3516	11.3301	11.3469	11.5057	11.3039	11.2441
ENSG00000006459	KDM7A	9.2161	9.43009	9.64906	9.46224	9.49574	9.38555	9.38571	9.57638	9.39354	9.5516	9.25855	9.27673	9.70122	9.28642	9.32531	8.81147	8.84599	9.00121	8.83475	9.58326	8.92616	8.98273	9.34319	8.93586	9.44056	8.63803	8.92595	9.1385	8.89342	9.66037
ENSG00000006468	ETV1	8.71746	8.8355	8.77545	8.64853	8.80435	8.53858	8.72335	8.51409	8.60823	8.75153	8.69874	8.57029	8.67106	8.62051	8.73873	8.79506	8.80128	8.69043	8.72548	8.73641	8.94216	8.9303	8.64343	8.5749	8.53267	8.84217	8.78294	8.50138	8.79858	8.70053
ENSG00000006530	AGK	10.2098	10.1789	10.2461	10.2777	10.1913	10.3189	10.0571	10.1138	10.1616	10.2625	10.1738	10.2699	10.2113	10.1886	10.1938	10.2986	10.229	10.2846	10.2473	10.213	10.142	10.2615	10.2381	10.148	10.1528	10.285	10.3175	10.19	10.3719	10.1632
ENSG00000006534	ALDH3B1	5.09855	5.34297	3.8936	5.26784	4.34266	4.82233	4.83946	4.78725	4.50573	4.45223	4.06266	5.08379	4.26481	4.38694	5.1332	5.33511	5.43044	5.03467	4.69933	5.3261	4.62821	5.18761	5.25192	4.52658	4.98751	5.16265	5.02025	4.96709	5.0723	5.32796
ENSG00000006555	TTC22	1.80516	0	2.39654	0	1.77027	0	0	1.22072	2.11808	1.45463	0	0	0	1.11894	0	0	1.26553	0	0	1.9494	0	0	1.42579	0.940111	2.27516	0	0	2.2948	0	2.25281
ENSG00000006576	PHTF2	9.77308	9.9703	10.1136	10.079	10.0606	10.0286	9.92609	9.89138	9.89668	10.0094	10.0144	9.99794	10.0029	9.84877	9.94738	10.2347	10.4111	9.86956	10.4474	10.2864	10.4163	10.4143	9.9999	10.3885	9.82655	10.1665	10.2242	9.70921	10.1472	10.2709
ENSG00000006606	CCL26	0	0	0	0	0	0	0	0	0	0	0	0	2.14304	0	0	0	0	0	0	0	0	0	0	0	0	0	0	0	0.844953	0
ENSG00000006607	FARP2	11.6382	11.7241	11.7092	11.6771	11.6294	11.6274	11.7033	11.645	11.6993	11.6256	11.7569	11.672	11.6578	11.6969	11.62	11.6598	11.6431	11.4662	11.6932	11.511	11.7004	11.6976	11.6269	11.6745	11.4353	11.6434	11.706	11.4768	11.5983	11.4597
ENSG00000006611	USH1C	2.36675	0	0	0	0	0	0	0	0	0	1.77272	1.14992	1.71279	1.74147	0	0	1.26553	0	1.13062	0.966461	1.60123	0	0	1.90921	0	1.70964	0	0	0.844953	0
ENSG00000006625	GGCT	11.3652	11.4403	11.4628	11.4774	11.4282	11.4392	11.313	11.2976	11.2926	11.32	11.3816	11.4252	11.4562	11.3567	11.3781	11.7471	11.821	11.5848	11.7194	11.4547	11.7421	11.8222	11.4642	11.6826	11.23	11.6785	11.7071	11.4048	11.7377	11.5473
ENSG00000006634	DBF4	9.50901	9.5932	9.79474	9.70278	9.5478	9.74263	9.50739	9.61362	9.59708	9.76581	9.55589	9.64068	9.80956	9.66939	9.36581	10.3044	10.303	9.65354	10.3522	9.9601	10.4077	10.338	9.83652	10.3885	9.46036	10.2031	10.1354	9.45792	10.1082	9.97521
ENSG00000006638	TBXA2R	3.83844	3.15665	3.08141	3.53416	2.81311	1.38152	0	2.66049	2.77547	2.9934	2.81607	2.55485	2.47402	3.00563	2.82546	1.18264	1.26553	2.79876	0	0.966461	2.68349	2.81122	2.38309	3.06167	3.40617	2.4703	2.13758	2.5567	1.3743	2.81266
ENSG00000006652	IFRD1	9.4841	9.67332	10.1038	9.67927	10.1414	9.82665	9.531	9.8792	9.56243	10.1106	9.61489	9.56839	9.84215	9.58605	10.0015	9.76424	9.72981	9.95576	9.99495	10.5661	9.83435	9.79186	10.0604	9.84498	10.4395	9.79584	9.73312	10.0495	9.81747	10.6992
ENSG00000006659	LGALS14	0	0	0	0	0	0	0	1.22072	0	0	0	0	0	0	0	0	0	0	0	0	0	0	0	0	0	0	0	0	0	0
ENSG00000006695	COX10	9.68109	9.6532	9.62198	9.5992	9.58677	9.60069	9.64146	9.51998	9.55604	9.61543	9.62596	9.72206	9.60954	9.59044	9.6435	9.87179	9.72742	9.71449	9.93661	9.62918	9.70085	9.70783	9.4427	9.72326	9.61556	9.84179	9.92321	9.61352	9.88948	9.50752
ENSG00000006704	GTF2IRD1	9.51885	9.69514	9.79127	9.55928	9.71854	9.64475	9.68	9.75585	9.51546	9.82515	9.66084	9.56143	9.74017	9.65058	9.85555	9.34413	9.40173	9.69042	9.36371	9.59221	9.41447	9.4426	9.74733	9.57301	9.76844	9.49354	9.59247	9.74577	9.59937	9.71052
ENSG00000006712	PAF1	10.2732	10.3858	9.69618	10.2323	9.91149	10.176	10.3332	10.143	10.6801	10.1365	10.8247	10.8411	10.7499	10.9676	10.475	10.3416	10.3841	10.4738	10.4958	9.55609	10.7111	10.5892	10.5568	10.5911	10.3997	10.7335	10.5056	10.3302	10.5425	9.98382
ENSG00000006715	VPS41	10.2906	10.3894	10.6405	10.4444	10.3794	10.381	10.2992	10.3862	10.3525	10.4679	10.3282	10.3583	10.5659	10.3332	10.47	10.3044	10.2205	10.365	10.226	10.6937	10.3101	10.3276	10.5832	10.2364	10.5582	10.2824	10.2943	10.4069	10.2871	10.8032
ENSG00000006740	ARHGAP44	9.76207	9.79954	9.89023	9.81492	9.81438	9.85943	9.7681	9.7866	9.7616	9.89935	9.75061	9.77922	9.77435	9.78505	9.95093	9.47346	9.55502	9.77298	9.57871	9.98476	9.41304	9.4146	9.80559	9.636	9.94932	9.5116	9.71426	9.82403	9.61703	9.9157
ENSG00000006744	ELAC2	11.941	11.9275	11.693	11.8593	11.776	11.862	11.9554	11.6974	11.8606	11.8139	11.9362	11.9895	11.7365	11.9451	11.8868	12.0042	11.9749	11.9092	11.9521	11.633	11.8819	11.927	11.8149	11.8892	11.809	11.9933	12.0398	11.8318	12.0335	11.6243
ENSG00000006747	SCIN	5.02676	5.69762	5.73473	5.46929	5.34995	5.95433	5.11423	4.78725	5.67574	5.61099	5.99641	5.2776	5.6099	5.86844	5.63539	5.72972	5.8721	5.57514	5.6713	5.29137	5.89017	5.76819	5.2835	5.49494	5.32356	5.85224	5.89855	5.13689	6.0507	5.18593
ENSG00000006756	ARSD	10.3143	10.3171	10.3629	10.254	10.2974	10.1539	10.3142	10.338	10.2641	10.3593	10.28	10.2699	10.3475	10.251	10.3634	9.91038	9.91327	10.2983	9.98144	10.3947	9.9327	9.76328	10.2522	10.0096	10.3131	10.0069	10.0385	10.2925	9.96842	10.1745
ENSG00000006757	PNPLA4	8.85595	9.02283	8.99938	8.96141	8.87274	8.91955	9.12518	8.91494	8.80427	8.91914	8.96259	9.01982	8.85264	8.90073	8.87966	8.79506	8.81933	9.26145	8.81964	9.10467	8.76237	8.79349	8.8579	8.73588	8.99217	8.82542	8.96083	9.12089	8.88373	9.03062
ENSG00000006788	MYH13	1.80516	0	0	0	0	1.38152	0	0	0	0	0	0	0	0	1.14905	0	0	0	0	0	0	0	0.882294	0	0	0	0	0	0	0
ENSG00000006831	ADIPOR2	11.4218	11.4178	11.4325	11.55	11.5122	11.4434	11.4419	11.4077	11.3978	11.5681	11.3855	11.4379	11.333	11.4902	11.5038	11.5644	11.4775	11.4047	11.5609	11.5086	11.5559	11.4682	11.4667	11.5038	11.4686	11.4109	11.5122	11.4059	11.5846	11.4119
ENSG00000006837	CDKL3	5.13315	4.16721	4.48071	4.9906	4.96069	5.04912	4.77762	5.44559	4.79333	4.97569	4.58263	3.96608	4.88139	4.6786	4.07295	4.85489	4.36864	4.8483	4.69933	4.57876	4.94637	4.48543	5.6413	5.0511	4.58755	4.31638	4.72802	4.92132	4.85136	4.73387
ENSG00000007001	UPP2	0	1.09158	0	0	0	0	0	0	1.41715	0	0	0	0	1.11894	0	0	0	0	1.75662	0	0	1.22497	0	0	0	0	0.887572	0	1.7607	0
ENSG00000007038	PRSS21	0	0	0	0	0	0	0	1.87233	0	0	0	0	1.09692	0	1.78047	0	0	0	1.13062	0	0	0	0	0	0.713771	0	0	0	0	0
ENSG00000007047	MARK4	9.10719	9.08424	9.06977	9.11952	9.09257	8.92909	9.08425	9.08718	9.11364	9.11982	9.05071	9.04335	9.05772	9.19994	9.03173	8.70574	8.80128	8.94709	8.85342	9.02765	8.74652	8.68983	9.03996	8.81747	9.19643	8.93211	8.84826	9.02678	8.98921	8.99486
ENSG00000007062	PROM1	2.93592	0	0	0	0	1.38152	0	1.22072	0.876006	0.903374	1.14306	1.14992	0	0	0	0	0	0	0	0	0	0.738771	0	0	0	1.3299	0	0.983108	0	0.81001
ENSG00000007080	CCDC124	11.3638	11.2881	11.0891	11.2771	11.184	11.2666	11.4047	11.1338	11.263	11.2335	11.3894	11.4587	11.247	11.4388	11.4249	11.4393	11.3412	11.5441	11.3211	10.8201	11.3952	11.432	11.1747	11.4603	11.2422	11.6414	11.5302	11.4493	11.5168	10.9917
ENSG00000007129	CEACAM21	0	0	0	0	0	1.38152	0	0	0	0	0	0	0	0	0	0	1.26553	0	0	0	0	0	0	0	0	0	0	0	0	0
ENSG00000007168	PAFAH1B1	12.042	12.043	12.1496	12.1742	12.1989	12.0529	11.9308	12.0468	12.0235	12.1629	11.9981	12.0322	12.0296	12.0163	12.113	12.0683	12.075	12.0272	12.1284	12.3727	12.1152	12.0908	12.1476	12.1711	12.2452	11.9933	12.0508	12.0247	12.1609	12.431
ENSG00000007171	NOS2	0.873071	0	1.04708	0	0	0	1.13836	0	0	0	0	1.14992	1.09692	0	0	0	0	0	0	0	0	0.738771	1.42579	0	0.713771	0	0	0	0	0
ENSG00000007174	DNAH9	3.66013	2.96097	3.78619	2.75991	3.04152	3.17426	4.15529	2.66049	2.37196	1.45463	2.81607	2.21942	3.16556	2.77808	3.71993	2.26596	3.23648	2.31391	3.54914	3.74444	3.29486	3.06286	2.95353	2.8935	3.11787	3.33388	2.96356	1.5624	3.28663	3.70615
ENSG00000007202	KIAA0100	14.1391	14.1282	14.0191	14.1204	14.0975	14.0577	14.0903	14.0261	14.0665	14.1768	14.1656	14.1736	14.065	14.2081	14.194	14.1948	14.1312	14.0182	14.1283	13.8327	14.1475	14.1105	13.9966	14.0859	13.964	14.1775	14.1671	14.0366	14.152	13.827
ENSG00000007216	SLC13A2	0	0	0	0	0	0	0	0	0.876006	0	0	0	0	0	0	0	0	0	0	0	0	0	0	0	0	0	0	0	0	1.32564
ENSG00000007237	GAS7	1.80516	1.70583	1.04708	1.5482	0	2.07411	1.13836	1.87233	0.876006	2.16406	2.54447	2.55485	2.14304	2.17493	1.78047	1.82368	1.26553	0.994993	0	0.966461	1.89221	0.738771	1.42579	1.90921	2.07054	2.00996	0.887572	2.77827	1.3743	1.32564
ENSG00000007255	TRAPPC6A	8.16936	8.24316	8.06386	8.14436	8.15134	8.26508	8.09009	8.10386	8.21282	8.15361	8.1425	7.95688	8.14703	8.06078	8.07088	7.72659	7.90513	8.46573	7.9704	8.33321	7.89254	7.96063	8.14724	7.79105	8.36073	7.86184	8.09734	8.37126	8.02989	8.11207
ENSG00000007264	MATK	1.41311	1.09158	1.04708	0.972514	1.14117	0	1.76665	1.22072	1.80977	0.903374	0	0	1.09692	0	1.14905	1.18264	0	1.57828	0	0.966461	1.23635	1.22497	1.42579	0	0	0.813057	1.82789	0.983108	0	2.25281
ENSG00000007306	CEACAM7	0	0	0	0	0	0	0	0	0	0	0	0	0	0	0	0	0	0	0	0	0	0	0	0	0	0	0	0	0	0
ENSG00000007312	CD79B	1.80516	0	1.04708	0	0	2.54009	0	0	0.876006	0	0	2.82682	0	0	2.55354	0	0	0	0	1.54007	0	0	0	0	0.713771	0	0	0	0	0
ENSG00000007314	SCN4A	2.36675	0	1.04708	0	0	0	0	0	0	0	0	0	1.09692	1.74147	0	0	0	0	1.13062	1.9494	0.74675	0	0	0	1.18914	0	1.82789	0	1.3743	0
ENSG00000007341	ST7L	9.72853	9.61625	9.82728	9.79474	9.91329	9.67906	9.77009	9.70155	9.804	9.80564	9.62154	9.6712	9.7286	9.60788	9.72879	9.76634	9.75816	9.85571	9.82373	9.81789	9.72994	9.76661	9.72881	9.87352	9.66076	9.73435	9.70106	9.5416	9.70086	9.85949
ENSG00000007350	TKTL1	1.80516	2.96097	1.04708	1.95857	2.20689	2.54009	2.53736	0	1.41715	1.85252	2.81607	1.78159	3.16556	3.00563	1.78047	2.26596	2.38197	1.99248	1.13062	1.9494	2.13423	1.58797	2.59928	3.79301	1.5461	2.4703	2.7971	1.5624	1.7607	0.81001
ENSG00000007372	PAX6	2.11311	0	0	0	0	0	0	0	0	0	0	0	0	0	0	0	0	0	0	0	0	0	0	0	0	0	0	0.983108	0	0.81001
ENSG00000007376	RPUSD1	10.622	10.5062	10.1329	10.3854	10.3316	10.3547	10.4896	10.1947	10.5639	10.3137	10.5245	10.5322	10.2237	10.5175	10.4513	10.5181	10.4141	10.6028	10.4621	9.91804	10.5417	10.5427	10.3402	10.4561	10.0949	10.5857	10.5947	10.3849	10.6472	9.80708
ENSG00000007384	RHBDF1	10.2129	10.1634	10.1274	10.1182	10.1008	10.0397	10.1393	9.93909	10.0283	10.1476	10.0931	9.97715	9.95572	10.0959	10.1511	9.80372	9.64126	9.80536	9.64451	9.56884	9.54852	9.51032	9.77536	9.61587	9.83264	9.80686	9.64549	9.99257	9.7282	9.54728
ENSG00000007392	LUC7L	10.0264	10.0844	9.94744	10.1082	10.0557	10.192	10.1239	10.077	10.2344	9.93955	10.1828	10.1742	9.93404	10.0535	9.93128	10.0909	10.0835	9.90884	9.98483	9.93501	10.135	10.147	10.0975	10.1363	9.87751	10.1348	10.0855	10.1145	10.1113	9.98917
ENSG00000007402	CACNA2D2	8.3271	8.19386	8.15843	8.11462	8.21126	8.00147	8.05794	8.24342	8.19648	8.27209	8.28346	8.31263	8.16432	7.9693	8.29995	7.80241	7.75379	7.99563	7.70028	7.90968	7.80777	7.68397	7.89973	7.61969	8.13954	7.94838	7.59964	8.03761	7.86723	7.77269
ENSG00000007516	BAIAP3	7.54897	7.53423	7.79268	7.65212	7.5628	7.78753	7.33963	7.316	7.48986	7.38589	7.65541	7.56946	7.40572	7.48482	7.86776	7.17492	7.28038	7.15996	6.67398	7.0201	7.28157	7.07415	7.5691	7.12639	7.87425	7.15528	7.26689	7.58824	7.30969	7.41342
ENSG00000007520	TSR3	9.78537	9.83749	9.72737	9.72592	9.7061	9.64475	9.92609	9.7647	9.62634	9.67348	9.66084	9.76917	9.4659	9.68179	9.75138	9.68855	9.80647	10.0735	9.82184	9.62395	9.6236	9.78203	9.48576	9.71697	9.95305	9.87822	9.98985	10.1322	9.97186	9.60981
ENSG00000007541	PIGQ	9.87498	9.8814	9.82389	9.9031	9.97681	9.82409	9.85675	9.83785	9.94271	9.88747	9.88943	9.805	9.81869	9.89034	10.0185	9.88735	9.77444	10.1205	9.93486	9.89075	9.84076	9.75549	9.84051	9.79662	10.1092	10.0154	10.0185	10.0928	9.97415	9.74512
ENSG00000007545	CRAMP1	9.02897	9.05079	8.83393	8.96141	8.85406	8.93856	9.18893	9.01481	9.20631	8.80585	9.19453	9.01303	9.07001	9.248	8.91649	9.04443	8.85914	8.72808	8.92578	8.60472	9.14583	8.97317	9.00486	9.01741	8.95171	9.14767	9.03518	8.96326	9.07051	8.82555
ENSG00000007866	TEAD3	9.08085	8.92214	8.87054	8.95862	8.80824	8.90513	8.92935	8.87461	8.97444	8.89823	8.90193	8.95397	8.88775	9.00312	8.90187	8.77847	8.84599	8.72808	8.76151	8.74606	8.86244	8.62043	8.73194	8.83789	8.84531	8.93211	8.8023	8.86393	8.83173	8.56363
ENSG00000007908	SELE	1.41311	0	1.6474	0	0	0	0	0	0	0.903374	1.77272	0	1.71279	0	1.14905	0	1.92915	1.57828	0	1.54007	0.74675	0	1.81963	0	0.713771	0.813057	0	0	0.844953	1.32564
ENSG00000007923	DNAJC11	11.7005	11.7056	11.4375	11.5861	11.4979	11.6499	11.6971	11.538	11.7055	11.6076	11.7625	11.7404	11.5616	11.7881	11.6688	11.952	11.8427	11.6152	11.9116	11.2245	11.9081	11.886	11.6303	11.9668	11.5236	11.9828	11.9583	11.6828	11.9413	11.391
ENSG00000007933	FMO3	1.41311	0	0	0	0	0	0	0	0	0	0	0	1.09692	0	0	0	1.26553	0	0	0	0	0	0	0	0	0	0	0	0	0.81001
ENSG00000007944	MYLIP	9.35997	9.41344	9.47192	9.37503	9.1488	9.37512	9.44161	9.44484	9.38456	9.28995	9.49919	9.45269	9.30636	9.248	9.34705	9.36094	9.38061	9.30513	9.39973	9.10717	9.42019	9.42867	9.31863	9.42083	9.16138	9.41573	9.36774	9.30814	9.42986	9.22837
ENSG00000007952	NOX1	0.873071	1.70583	1.6474	1.95857	2.54161	2.89174	2.20287	2.66049	1.80977	1.85252	2.54447	0	2.96972	1.74147	2.21818	1.18264	2.38197	3.45031	0	1.54007	1.23635	1.58797	1.81963	1.50454	1.83202	1.3299	1.43302	3.13976	1.7607	2.00464
ENSG00000007968	E2F2	9.3745	9.44421	9.1532	9.38544	9.469	9.25895	9.49303	9.25681	9.5253	9.42396	9.52546	9.47757	9.19302	9.44763	9.48583	9.96456	9.96486	9.5155	9.92959	9.10467	9.88798	9.84947	9.63552	9.79065	9.30552	9.97688	9.96184	9.73424	10.0058	9.07563
ENSG00000008018	PSMB1	11.6517	11.7207	11.8316	11.7683	11.6975	11.7622	11.6934	11.7339	11.6011	11.6935	11.6745	11.7659	11.7302	11.6613	11.6876	11.8183	11.8749	11.9959	11.853	11.8014	11.8042	11.8375	11.595	11.8132	11.6888	11.7761	11.8019	11.682	11.9219	11.8034
ENSG00000008056	SYN1	0.873071	0	1.6474	0	1.14117	0	0	1.87233	0	2.42012	2.20959	0	0	0	0	0	1.26553	0	0	0	0	1.22497	0	1.90921	0	1.3299	0	0	0	0
ENSG00000008083	JARID2	10.3497	10.3171	10.2874	10.2241	10.3949	10.3043	10.2157	10.3732	10.3028	10.3488	10.2474	10.3743	10.35	10.3161	10.395	10.2603	10.2885	10.2938	10.2739	10.435	10.366	10.2257	10.39	10.3196	10.624	10.2806	10.2015	10.3797	10.195	10.6179
ENSG00000008086	CDKL5	6.97423	6.73051	7.22131	6.83979	7.11309	6.96136	6.92043	7.13664	6.98063	7.28482	6.95728	6.4113	7.15211	6.60131	7.00963	6.92649	6.78822	7.11932	6.7072	7.21797	6.82718	6.6816	6.88532	6.76135	6.9825	6.55616	6.65044	7.25164	6.6853	7.0936
ENSG00000008118	CAMK1G	1.41311	1.70583	0	0	0	1.38152	0	1.22072	0	0	0	0	1.09692	0	0	0	0	0	0	0	0	0	0.882294	1.50454	0	0	0	0.983108	0.844953	1.70473
ENSG00000008128	CDK11A	4.65049	4.97907	5.04397	4.1954	4.6503	4.34092	4.77762	4.85515	5.23851	4.50848	4.96403	5.32224	4.76534	5.31005	4.91764	4.02138	4.63637	4.63423	5.10042	4.18371	4.91429	4.92719	4.08939	4.92589	4.58755	4.61264	4.41964	4.55241	5.10604	4.46534
ENSG00000008130	NADK	11.3473	11.4421	11.2806	11.3465	11.3215	11.4241	11.466	11.3478	11.3739	11.3308	11.4561	11.429	11.2671	11.4321	11.3642	11.4147	11.4909	11.4004	11.3962	11.1489	11.3644	11.3913	11.3392	11.3904	11.2578	11.4045	11.4275	11.4713	11.4461	11.1368
ENSG00000008196	TFAP2B	1.41311	1.70583	0	0	0	0	1.13836	0	0	0	0	0	0	0	0	0	0	0	0	0	0	0	0	0	1.18914	0	0	0	0	0
ENSG00000008197	TFAP2D	0.873071	0	0	0	0	0	0	0	0	0	0	0	0	0	0	0	0	0	0	0	0	0	0	0	0	0	0	0	0	0
ENSG00000008226	DLEC1	3.83844	3.62185	3.67014	3.64928	3.95113	4.55311	4.71301	3.96688	4.21265	3.51667	3.57002	4.17523	3.75795	3.37504	4.51843	4.23103	3.7695	4.07802	3.02453	3.10975	2.52257	2.32554	2.78725	2.70311	3.78678	3.87034	3.68939	3.55384	3.93845	1.70473
ENSG00000008256	CYTH3	10.6911	10.8385	11.0219	10.879	10.9873	10.7646	10.82	10.8957	10.8206	11.0227	10.8542	10.816	10.8188	10.836	11.0389	10.8182	10.8806	11.0082	10.875	11.1416	10.8784	10.8413	11.0051	10.8833	11.1085	10.8505	10.8762	11.0488	10.9181	11.1531
ENSG00000008277	ADAM22	9.18552	9.24078	9.40541	9.34759	9.38564	9.23609	9.35957	9.41422	9.34248	9.35468	9.22106	9.25962	9.34224	9.17676	9.32805	8.93639	9.10336	9.24737	9.23578	9.56884	9.22151	9.15171	9.27805	9.26368	9.40423	9.21353	9.21515	9.26528	9.07051	9.60841
ENSG00000008282	SYPL1	10.8082	10.9021	11.0706	10.9697	11.0111	11.1884	10.8084	10.8074	10.8639	10.8979	10.977	10.9808	11.0182	10.7833	10.8595	11.1535	11.2651	10.99	11.2268	11.2467	11.3378	11.2766	11.12	11.3222	10.8298	10.9614	10.9958	10.7041	11.0674	11.2738
ENSG00000008283	CYB561	12.6628	12.6136	12.4989	12.6054	12.604	12.6117	12.6301	12.5297	12.6061	12.602	12.652	12.6876	12.5141	12.6882	12.6823	12.5669	12.6066	12.7451	12.5601	12.5353	12.5556	12.5913	12.5807	12.5163	12.6288	12.6147	12.5936	12.7482	12.6405	12.5144
ENSG00000008294	SPAG9	11.0531	11.092	11.1966	11.1417	11.1438	11.0434	11.011	11.1508	11.1274	11.1008	11.1549	10.9851	11.2314	11.0944	11.124	11.1463	11.1032	11.0005	11.195	11.1201	11.181	11.1511	11.1417	11.125	11.0286	11.1126	11.1128	10.9462	11.0738	11.1945
ENSG00000008300	CELSR3	7.49678	7.61968	7.50154	7.50704	7.61696	7.5853	7.64687	7.79366	8.04502	7.60167	8.14866	7.97096	7.98136	8.07339	7.77456	7.18755	7.44055	7.39091	7.33616	7.0201	7.53464	7.31736	7.95471	7.4252	7.76811	7.53676	7.38898	7.68042	7.54316	7.18605
ENSG00000008311	AASS	8.34197	8.46256	8.40073	8.5107	8.63094	8.40147	8.55386	8.57072	8.26859	8.6981	8.43724	8.42435	8.52704	8.39299	8.52169	8.01565	8.16009	8.01237	8.06955	8.44407	7.94509	7.90133	8.37686	7.90049	8.52014	7.94395	8.01914	8.15596	7.90606	8.36702
ENSG00000008323	PLEKHG6	4.8715	4.33831	4.33587	4.4065	5.16841	4.90195	4.71301	4.71599	4.95747	4.71384	4.65361	4.66564	3.75795	4.80494	3.58004	4.23103	4.55253	4.44986	5.04951	4.25752	4.46063	3.9111	4.08939	3.06167	4.33647	5.00154	4.23659	4.49107	4.01149	4.25379
ENSG00000008324	SS18L2	9.03127	8.9879	9.08968	9.05312	8.92377	9.10343	8.94702	8.9503	9.00525	8.8582	8.9765	9.12751	9.00433	9.06441	8.93455	9.394	9.47473	9.33206	9.40986	9.22686	9.40873	9.49033	9.08993	9.49618	9.06294	9.37684	9.35468	8.93187	9.30467	9.34658
ENSG00000008382	MPND	8.16936	8.3768	8.0581	7.95594	7.46774	7.9462	8.3298	8.04692	8.70958	8.10882	8.96608	8.69435	8.91183	8.91481	8.44311	7.8106	7.95496	8.62299	7.99751	7.09248	8.38328	8.30675	8.54589	8.33742	8.30926	8.31701	8.03325	8.11079	8.12759	7.82634
ENSG00000008394	MGST1	12.1526	12.1731	12.3412	12.2351	12.299	12.2887	12.1026	12.1694	12.1244	12.2572	12.1032	12.2373	12.3221	12.1833	12.1857	12.0342	12.123	12.3932	12.1613	12.3854	12.1185	12.1525	12.2223	12.069	12.2183	12.0327	12.0254	12.1394	12.1178	12.4126
ENSG00000008405	CRY1	9.81896	9.93072	10.0627	9.9389	10.1383	10.0745	9.86607	9.85038	9.77266	10.1398	9.84273	9.90744	9.94575	9.80786	10.0387	9.91228	9.90695	9.91924	9.87945	10.0407	9.91052	9.83476	9.94047	9.84786	10.059	9.87007	9.98017	9.94333	9.99456	10.1062
ENSG00000008438	PGLYRP1	0	0	0	0	0	0	0	0	0	0	0	0	0	0	0	0	0	0	0	0	0	0	0	0	0	0	0	0	0	0
ENSG00000008441	NFIX	14.881	14.8888	14.6556	14.8037	14.8034	14.7648	14.8996	14.6889	14.8821	14.8957	14.9272	14.902	14.7153	14.9518	14.9425	14.9324	14.9029	14.671	14.9982	14.8169	14.938	14.834	14.8235	15.0006	14.9699	14.9342	14.9084	14.8081	14.9754	14.7406
ENSG00000008513	ST3GAL1	14.8743	14.9015	15.0704	14.8899	14.9366	14.8457	14.8788	15.1247	14.8873	14.9834	14.8452	14.8641	15.0635	14.9214	14.9596	14.5177	14.539	15.1479	14.6006	14.9041	14.4867	14.5478	15.1865	14.6018	15.0363	14.4964	14.6109	15.2116	14.6654	14.9338
ENSG00000008516	MMP25	3.99711	4.25529	4.54802	4.26925	4.57932	3.17426	4.15529	3.36658	4.21265	4.61481	4.58263	3.58149	4.17669	4.9211	4.35635	4.23103	4.03964	4.63423	3.68877	4.32775	2.82824	4.09171	4.76248	4.34285	4.76784	4.61264	3.86799	3.55384	3.60252	4.36344
ENSG00000008517	IL32	4.20654	3.97306	4.33587	4.64711	3.70663	4.09205	2.80871	4.29489	3.66608	4.61481	4.25756	2.82682	4.08284	3.66889	4.35635	3.63566	3.00374	4.07802	2.52559	3.93646	3.29486	3.37331	3.23772	3.47319	4.14096	4.07857	3.37165	3.55384	3.93845	4.19567
ENSG00000008710	PKD1	11.179	11.2591	11.3688	10.9494	11.3524	11.0941	11.0831	11.6676	11.6	11.496	11.6627	11.4969	11.9555	11.5753	11.7197	11.2951	11.4173	11.5973	11.437	11.3972	11.5012	11.3739	12.124	11.6371	12.1563	11.5161	11.3841	11.8646	11.4609	11.8025
ENSG00000008735	MAPK8IP2	8.76787	8.728	8.45872	8.4838	8.40329	8.55715	8.81856	8.59077	8.89059	8.63633	8.99371	9.0763	8.89467	9.1532	8.95239	8.66118	8.75045	8.94709	8.6591	8.01453	8.8833	8.72901	8.85001	8.8204	8.58169	8.87975	8.86413	8.80214	8.74068	8.2612
ENSG00000008838	MED24	11.3147	11.2901	11.2341	11.3518	11.2397	11.2918	11.3041	11.3412	11.3268	11.3327	11.3398	11.2707	11.1699	11.4074	11.4414	11.324	11.3128	11.3563	11.3298	11.1628	11.2275	11.3081	11.2595	11.3386	11.2935	11.4053	11.3455	11.2681	11.4086	11.1154
ENSG00000008853	RHOBTB2	10.1275	10.0324	9.69247	9.85144	9.70193	9.94651	10.1652	9.98717	10.2284	9.89935	10.331	10.3992	10.3052	10.4234	10.168	10.142	10.1222	9.92072	10.0067	9.24285	10.148	10.0557	10.0246	10.1197	9.78109	10.2523	10.099	9.86238	10.0798	9.52237
ENSG00000008869	HEATR5B	10.5072	10.6923	10.7526	10.6036	10.7534	10.6838	10.4456	10.7258	10.6116	10.6925	10.5549	10.5394	10.7499	10.5585	10.5635	10.5793	10.6755	10.4858	10.571	10.6369	10.5818	10.5225	10.6627	10.5016	10.627	10.575	10.5182	10.4529	10.5632	10.6722
ENSG00000008952	SEC62	11.3652	11.4172	11.3987	11.4399	11.3188	11.5476	11.3873	11.3052	11.423	11.3886	11.4367	11.509	11.543	11.4521	11.2896	11.5619	11.6348	11.3012	11.5739	11.5505	11.5714	11.6383	11.517	11.539	11.3395	11.5172	11.5004	11.2485	11.5207	11.652
ENSG00000008988	RPS20	14.1938	14.1513	14.2852	14.1372	14.0859	14.1979	14.1294	14.2475	14.0091	14.0523	14.0134	14.1652	14.2413	14.1596	14.1435	14.1512	14.2174	14.5213	14.2088	14.2258	14.0563	14.2365	13.973	14.1117	14.2728	14.2343	14.2816	14.357	14.3806	14.1559
ENSG00000009307	CSDE1	14.6725	14.6983	14.8077	14.7042	14.7281	14.7413	14.6615	14.7493	14.622	14.7811	14.6533	14.7086	14.84	14.6746	14.7141	14.8286	14.8381	14.7417	14.7935	14.7988	14.8298	14.8461	14.7421	14.74	14.7677	14.7749	14.7977	14.6451	14.8722	14.8564
ENSG00000009335	UBE3C	12.7632	12.7748	12.732	12.7359	12.7173	12.7848	12.726	12.7218	12.7049	12.7518	12.7112	12.7964	12.7242	12.7989	12.7504	12.9404	12.9059	12.7023	12.8956	12.7666	12.9405	12.9262	12.7915	12.8974	12.6489	12.8897	12.8426	12.6907	12.9038	12.7301
ENSG00000009413	REV3L	10.3815	10.4768	10.7703	10.6319	10.6061	10.5496	10.4751	10.6237	10.5309	10.5911	10.4215	10.5022	10.5938	10.3822	10.5055	10.5648	10.5172	10.2603	10.6089	10.7435	10.5792	10.5885	10.7641	10.5885	10.4086	10.4282	10.5406	10.3059	10.3456	10.841
ENSG00000009694	TENM1	9.35264	9.32461	9.45229	9.3326	9.24653	9.44325	9.4291	9.5789	9.42719	9.22429	9.52782	9.36206	9.3167	9.14725	9.06491	9.41024	9.1107	8.23793	8.59841	7.61194	9.03645	9.10516	8.72045	8.76968	7.20535	9.23544	8.89537	8.23291	8.41691	7.17857
ENSG00000009709	PAX7	1.41311	1.09158	0	0	0	0	1.13836	0	0	0	0	0	1.09692	0	0	0	0	0	0	0.966461	0	1.58797	0	0.940111	1.5461	0	0	0	0	0
ENSG00000009724	MASP2	4.49956	3.74866	3.78619	4.53181	3.41207	3.41041	4.77762	3.54164	4.14615	4.39369	4.50797	3.84892	2.74306	3.66889	3.05417	3.30588	3.43684	2.57661	3.54914	2.94079	3.56659	3.77677	3.93887	4.40673	4.08764	4.1418	4.68099	3.6691	4.14733	3.70615
ENSG00000009765	IYD	6.85493	7.17639	6.97455	7.27576	7.10047	6.94265	6.78554	7.08101	7.12575	7.16743	6.95728	6.86798	7.03169	7.00826	7.24786	6.88058	6.67383	6.74495	6.7072	7.24544	6.7923	6.8583	7.03198	6.49364	7.14791	7.02719	6.61334	6.8118	6.70745	7.02016
ENSG00000009780	FAM76A	8.68576	8.67309	8.75423	8.61706	8.68265	8.75775	8.75178	8.71931	8.62969	8.72506	8.60334	8.80465	8.75713	8.65866	8.59621	8.7659	8.89362	8.61935	8.83099	8.46759	8.66693	8.78695	8.59706	8.78478	8.25588	8.66519	8.70867	8.48967	8.62906	8.73409
ENSG00000009790	TRAF3IP3	1.41311	0	0	0.972514	0	0	1.13836	0	0	0	0	0	0	1.74147	0	0	1.26553	0	0	0	0.74675	0.738771	0	0	0.713771	0	0	1.5624	0.844953	1.70473
ENSG00000009830	POMT2	9.57813	9.62454	9.487	9.645	9.44674	9.71533	9.63275	9.65944	9.57986	9.51603	9.52309	9.4602	9.45189	9.53455	9.52212	9.66843	9.39874	9.44531	9.43982	9.44001	9.55504	9.42306	9.42511	9.47584	9.43923	9.6029	9.54729	9.60991	9.5327	9.3008
ENSG00000009844	VTA1	11.6838	11.7361	11.8899	11.7381	11.7079	11.8197	11.6918	11.6823	11.6712	11.8121	11.7129	11.703	11.8432	11.7085	11.6569	11.763	12.018	11.9651	12.0609	12.1036	11.92	11.9838	11.8453	12.0488	11.7948	11.6898	11.8056	11.6965	11.9497	12.2623
ENSG00000009950	MLXIPL	5.43994	5.95602	5.8459	5.56036	5.81909	5.52205	5.61625	5.65056	5.36085	5.66149	5.75951	5.63694	5.46862	5.5812	4.66412	5.289	5.47667	5.66259	4.88502	5.864	5.03854	4.64819	6.00558	5.30686	5.63362	5.10034	5.65259	5.39308	5.53555	5.62077
ENSG00000009954	BAZ1B	11.4512	11.4427	11.1734	11.3475	11.271	11.4425	11.2813	11.3963	11.6058	11.4324	11.595	11.679	11.6197	11.7518	11.4769	11.7213	11.6297	11.5135	11.6932	11.0029	11.7871	11.69	11.6779	11.6557	11.4964	11.7212	11.6927	11.5387	11.6954	11.4539
ENSG00000010017	RANBP9	10.2858	10.3349	10.5905	10.3422	10.4851	10.2988	10.3251	10.4216	10.3451	10.6225	10.3296	10.2911	10.5196	10.416	10.5786	10.3626	10.4244	10.4504	10.3495	10.6703	10.4134	10.3602	10.4702	10.4052	10.5582	10.2692	10.3233	10.3003	10.3891	10.6802
ENSG00000010030	ETV7	2.5824	2.4658	1.6474	0	0	0	1.76665	2.31958	2.58778	1.45463	1.14306	1.78159	2.74306	3.00563	1.78047	1.18264	2.38197	2.31391	3.54914	0.966461	2.34143	1.87775	2.12869	2.70311	0	0.813057	2.60889	2.97031	2.53038	0.81001
ENSG00000010072	SPRTN	9.09628	9.2108	9.25993	9.27997	9.05382	9.19321	9.15892	9.11515	9.15015	9.18815	9.27553	9.27673	9.17323	9.12016	8.92374	9.32426	9.28319	9.16989	9.33477	9.32025	9.28561	9.27207	9.16179	9.38163	9.12545	9.17249	9.2048	9.1559	9.31192	9.21928
ENSG00000010165	METTL13	10.7368	10.6754	10.46	10.6852	10.4357	10.7131	10.821	10.703	10.934	10.5739	10.9428	11.0455	10.895	11.0393	10.8386	10.8202	10.8763	10.7474	10.7521	10.0236	10.987	10.8586	10.7451	10.9084	10.5801	10.9499	10.9654	10.6863	10.9026	10.3947
ENSG00000010219	DYRK4	8.24248	8.44862	8.40073	8.20677	8.58185	8.21139	8.55386	8.56059	8.16744	8.38157	8.31117	8.39331	8.53592	8.28331	8.40215	8.5335	8.39486	8.74488	8.19197	8.60825	8.14146	8.56292	8.23869	8.3292	8.65225	8.33403	8.4736	8.68034	8.47294	8.48089
ENSG00000010244	ZNF207	12.5062	12.4605	12.3976	12.5003	12.3857	12.5509	12.5056	12.3008	12.4395	12.4042	12.4832	12.4481	12.3428	12.4205	12.3669	12.5339	12.5614	12.4975	12.5567	12.4674	12.5457	12.5867	12.4007	12.6045	12.3128	12.5601	12.5388	12.291	12.5343	12.4396
ENSG00000010256	UQCRC1	12.4848	12.4348	12.3878	12.4159	12.4343	12.436	12.4304	12.3839	12.2457	12.4319	12.4011	12.482	12.339	12.485	12.524	12.5465	12.5033	12.7226	12.5083	12.361	12.4239	12.5321	12.2945	12.4657	12.4449	12.6284	12.6059	12.5888	12.6397	12.3557
ENSG00000010270	STARD3NL	10.1625	10.12	10.2487	10.2148	10.096	10.2483	10.0539	10.1832	9.99206	10.1129	10.1662	10.2484	10.2016	10.0912	10.2027	10.2255	10.264	10.3142	10.3429	10.1282	10.2884	10.3484	9.9999	10.304	9.96419	10.2487	10.2405	9.96746	10.2779	10.1923
ENSG00000010278	CD9	12.9693	12.9378	12.9892	12.8992	12.9364	12.98	12.9771	12.9947	12.8107	12.9505	12.833	12.947	12.9764	12.9415	13.064	12.9777	12.9877	13.1528	12.9532	12.985	12.8869	12.9576	12.7779	12.9419	12.9831	13.0136	12.9907	12.9917	13.055	12.8785
ENSG00000010282	HHATL	1.80516	0	1.6474	0	1.77027	0	0	0	0.876006	0	0	0	0	0	0	0	0	0.994993	0	0.966461	0	0	0	0	1.18914	0.813057	0	0.983108	0	0
ENSG00000010292	NCAPD2	13.1574	13.1483	13.0098	13.1236	13.0998	13.0628	13.0971	13.0203	13.0641	13.1358	13.1263	13.1176	12.9823	13.1514	13.1633	13.506	13.4431	13.0279	13.5011	12.9434	13.4321	13.3899	13.0025	13.413	12.9559	13.4622	13.4728	13.077	13.4217	12.8164
ENSG00000010295	IFFO1	4.44552	4.33831	3.8936	4.80442	4.57932	4.09205	4.05459	3.96688	4.07643	4.26897	3.95436	4.35786	3.49195	3.91289	4.07295	3.48017	4.15784	3.9906	3.54914	2.74937	4.27099	4.03398	4.15915	3.69408	3.64634	4.01244	3.86799	3.55384	4.85136	2.64906
ENSG00000010310	GIPR	0.873071	0	2.07006	0.972514	1.14117	2.54009	0	0	1.80977	0	0	0	2.14304	1.11894	0	1.18264	1.26553	0.994993	0	0.966461	0	0.738771	0.882294	0	1.18914	0.813057	0	0	1.3743	0.81001
ENSG00000010318	PHF7	8.2777	8.26455	8.46309	8.46035	8.21711	7.98328	7.99139	8.4107	8.17996	8.03892	8.02693	8.33459	8.47719	8.19376	8.42278	8.37146	8.3767	8.19457	8.23817	8.03567	8.31735	8.40395	8.15152	8.26603	8.3551	8.40017	8.4209	8.29255	8.49858	8.15845
ENSG00000010319	SEMA3G	7.46997	7.34646	6.61526	6.97835	7.02235	7.27724	7.50141	7.17699	7.61192	7.01071	7.66403	7.60603	7.1976	7.78994	7.3908	7.37581	7.19999	7.42465	7.4968	6.82753	7.5966	7.42234	7.75517	7.4097	7.40924	7.48893	7.29839	7.29715	7.42112	7.10154
ENSG00000010322	NISCH	11.5174	11.5007	11.3435	11.3968	11.3584	11.4738	11.4813	11.504	11.7387	11.3511	11.7088	11.695	11.5347	11.7326	11.5648	11.4485	11.3568	11.4687	11.4196	11.1954	11.448	11.4201	11.6399	11.5134	11.5895	11.5124	11.4911	11.6477	11.4621	11.3553
ENSG00000010327	STAB1	5.0631	4.97907	3.8936	4.53181	3.95113	3.79112	4.5744	4.91999	4.14615	3.72094	4.7859	3.84892	3.16556	3.37504	3.71993	3.1076	3.7695	3.69118	3.22136	3.52287	3.56659	3.54844	4.22569	3.21227	4.29002	4.2605	3.24802	3.6691	3.86151	3.43188
ENSG00000010361	FUZ	7.02116	7.28501	7.12541	6.7132	7.16249	6.94265	7.0698	7.24184	6.98063	6.83487	7.1039	6.91246	6.96749	6.99506	7.20087	6.55003	7.15805	7.18971	7.10639	7.17099	6.75656	6.71871	6.92591	6.72423	7.06757	6.75124	7.11593	7.45806	7.00442	6.7031
ENSG00000010379	SLC6A13	3.08475	3.15665	2.6626	2.2777	2.54161	1.38152	2.20287	1.87233	3.09044	2.8264	2.54447	1.78159	2.14304	3.20213	1.78047	1.18264	2.38197	2.79876	1.75662	2.26789	1.60123	2.11895	3.10261	1.90921	2.75719	2.96576	2.13758	2.5567	1.3743	0.81001
ENSG00000010404	IDS	6.83405	6.84848	6.99881	6.88747	6.91114	7.01607	6.97655	6.76528	7.09963	7.04915	6.95728	7.16617	6.94099	6.73429	6.88139	6.76742	6.82442	7.11932	6.77145	7.24544	6.98993	6.49096	6.98473	6.69894	7.05374	6.8397	6.86553	7.28816	7.01334	7.39417
ENSG00000010438	PRSS3	2.36675	2.13528	2.88715	0	2.54161	2.54009	0	1.22072	2.94154	1.85252	1.77272	0	2.14304	0	2.21818	1.18264	1.92915	0	0	0.966461	1.23635	1.22497	1.81963	0	2.61369	1.3299	0.887572	0	2.31644	2.4645
ENSG00000010539	ZNF200	9.38889	9.44655	9.27987	9.56662	9.21469	9.39246	9.37531	9.2662	9.38636	9.27989	9.40718	9.36739	9.33463	9.48822	9.16624	9.48117	9.39874	9.45962	9.56518	9.29198	9.59353	9.51296	9.31672	9.45333	9.1806	9.54561	9.4062	9.2352	9.40974	9.24816
ENSG00000010610	CD4	3.56197	2.13528	1.04708	1.95857	3.23866	2.07411	2.80871	2.66049	2.58778	2.8264	2.20959	3.05556	1.71279	2.77808	3.71993	1.82368	1.26553	1.99248	0	0.966461	1.60123	1.58797	2.38309	0.940111	2.07054	0.813057	0	0.983108	0.844953	2.64906
ENSG00000010626	LRRC23	6.70201	6.83425	6.93738	7.07418	7.04886	6.94265	6.75377	6.86745	6.7084	6.83487	6.79405	7.09076	7.05659	6.82655	6.75697	6.88058	6.92787	7.0775	6.90632	7.18051	6.8443	6.93915	6.61441	6.84443	7.09485	7.01035	7.16802	6.96628	7.30243	6.907
ENSG00000010671	BTK	0	1.09158	1.04708	1.95857	2.20689	0	1.13836	0	1.41715	0	1.14306	1.14992	0	1.11894	0	0	0	0.994993	1.75662	1.54007	1.60123	0.738771	0.882294	0	1.5461	0	0	1.5624	0	1.32564
ENSG00000010704	HFE	5.46731	5.45881	5.2997	5.61803	5.21598	5.66585	5.68524	5.30699	5.20623	5.55867	5.17177	5.40758	5.35276	5.54545	5.27606	5.33511	4.79072	6.05621	4.63172	5.3261	4.81354	5.01932	5.34466	4.78877	5.6149	4.4721	5.26313	5.1764	5.10604	5.48178
ENSG00000010803	SCMH1	11.7098	11.6534	11.6453	11.7152	11.688	11.6383	11.7499	11.6438	11.6492	11.7383	11.6782	11.695	11.6358	11.681	11.7664	11.7305	11.68	11.7577	11.6576	11.6524	11.6453	11.6718	11.6908	11.6043	11.7539	11.6818	11.7369	11.7806	11.6762	11.6577
ENSG00000010810	FYN	6.29158	5.98206	6.61526	6.37142	7.10047	6.78357	6.41095	6.67423	6.01082	6.77879	5.82248	6.25888	6.11558	6.31317	6.85128	6.22216	6.34051	7.23796	6.1044	7.77163	6.43344	6.01193	7.3921	5.96697	7.73815	5.79439	6.36817	7.29715	6.49466	7.76272
ENSG00000010818	HIVEP2	10.6977	10.7597	10.8878	10.6441	10.9596	10.7159	10.7351	10.7999	10.7384	10.9873	10.7406	10.6164	10.8802	10.7115	10.8811	10.5721	10.5047	10.5027	10.4802	10.8834	10.4855	10.4533	10.6776	10.3905	10.8404	10.5001	10.5788	10.7268	10.5541	10.7806
ENSG00000010932	FMO1	0	0	0	0	0	0	0	0	0	0	0	0	0	0	1.78047	0	0	0	0	0	0	0	0.882294	0	0	0	0	0	0	0
ENSG00000011007	ELOA	11.5088	11.486	11.2831	11.5077	11.3451	11.4516	11.4891	11.2707	11.4304	11.4063	11.5013	11.5854	11.2778	11.5002	11.3781	11.685	11.6818	11.4596	11.6881	11.2541	11.6635	11.6301	11.403	11.652	11.3424	11.7455	11.7111	11.4126	11.7075	11.2668
ENSG00000011009	LYPLA2	10.1593	10.0949	9.95831	10.0803	10.0109	10.1084	10.1592	9.91742	10.0283	9.91505	10.0819	10.1543	9.82957	10.2201	10.0652	10.0115	10.0552	10.1847	10.119	9.82853	9.90032	10.0356	9.74733	10.0211	9.85275	10.0793	10.0209	10.1669	10.0777	9.6988
ENSG00000011021	CLCN6	9.18963	9.14891	9.34519	9.19962	9.37782	9.23224	9.33294	9.39439	9.28376	9.18815	9.28394	9.08927	9.04222	9.25908	9.12907	9.01993	9.13252	9.14733	8.8828	9.27875	9.09128	8.86972	9.29558	9.02251	9.37671	9.18192	9.00446	9.29474	9.09171	9.13868
ENSG00000011028	MRC2	3.45663	2.4658	2.07006	2.2777	2.81311	1.38152	2.20287	0	2.94154	1.45463	3.24175	2.21942	3.75795	0	2.21818	1.82368	2.38197	2.31391	0	2.74937	2.52257	1.58797	1.81963	1.50454	2.45433	2.81874	0.887572	2.97031	2.53038	2.64906
ENSG00000011052	NME1-NME2	0	0	0	0	0	0	0	0	0	0	0	0	0	0	0	0	0	0	0	0	0	0	0	0	0	0	0	0	0	0
ENSG00000011083	SLC6A7	1.41311	0	0	0	0	0	0	0	0	0	0	0	0	0	0	0	0	0	0	0	0	0	0.882294	0	0	0	0.887572	0	0	0
ENSG00000011105	TSPAN9	10.2567	10.249	10.0218	10.1722	10.1414	10.0894	10.2054	10.0982	10.2294	10.1923	10.2257	10.2162	10.1734	10.2934	10.2308	9.86787	9.80873	9.96008	9.92253	9.86293	9.76184	9.88969	10.0558	10.0426	10.1192	9.87473	9.78964	10.02	9.93244	10.0188
ENSG00000011114	BTBD7	11.1455	11.1165	11.2806	11.2414	11.2626	11.1924	11.1517	11.1768	11.1772	11.2857	11.1028	11.1121	11.2483	11.1865	11.2214	11.1663	11.1005	10.9493	11.1175	11.1682	11.1928	11.0731	11.2085	11.0767	11.0734	11.0619	11.0775	11.0442	11.0572	11.1763
ENSG00000011132	APBA3	8.50934	8.40114	8.39617	8.64507	8.47348	8.53858	8.42364	8.50882	8.50255	8.47629	8.52031	8.32913	8.18705	8.45693	8.52646	8.078	8.27573	8.80377	8.25512	8.53963	8.32041	8.24449	8.45521	8.3618	8.48707	8.34078	8.37731	8.69402	8.52064	8.13158
ENSG00000011143	MKS1	9.55439	9.58259	9.70358	9.58842	9.67452	9.47288	9.68422	9.66418	9.51051	9.74254	9.5088	9.50203	9.51614	9.53455	9.63689	9.42897	9.52234	9.50173	9.66156	9.55609	9.50476	9.41601	9.48576	9.48697	9.58943	9.52944	9.57328	9.61172	9.58598	9.4697
ENSG00000011198	ABHD5	9.38889	9.50162	9.487	9.474	9.51727	9.45319	9.37008	9.51736	9.36824	9.41111	9.45765	9.34593	9.56251	9.51388	9.53875	9.59452	9.52234	9.50568	9.64879	9.45186	9.61489	9.6186	9.41088	9.62093	9.3529	9.57454	9.55219	9.35624	9.50134	9.60981
ENSG00000011201	ANOS1	0.873071	0	0	2.75991	0	2.07411	1.13836	2.31958	0.876006	0.903374	0	0	0	0	1.78047	1.18264	1.92915	0	0	0	1.60123	0.738771	0.882294	0.940111	1.18914	0.813057	0.887572	1.5624	0.844953	0.81001
ENSG00000011243	AKAP8L	10.5717	10.5472	10.2737	10.4494	10.3125	10.5121	10.5682	10.5488	10.6954	10.3517	10.7447	10.6497	10.5778	10.7659	10.5211	10.5564	10.468	10.588	10.4958	10.1195	10.6121	10.5047	10.6415	10.5677	10.6808	10.729	10.6538	10.6587	10.6444	10.4036
ENSG00000011258	MBTD1	9.82294	9.94735	10.1506	10.0133	10.0752	9.86441	9.81696	10.0428	10.0568	10.0656	9.85219	9.8438	10.0702	9.821	9.86312	10.0168	10.0552	9.84485	9.99831	10.2908	10.0304	10.0475	10.1152	10.0799	10.0319	9.90124	9.87308	9.91149	9.98552	10.3513
ENSG00000011260	UTP18	10.6059	10.5923	10.6482	10.7406	10.5619	10.7255	10.6329	10.6004	10.6315	10.6734	10.635	10.7521	10.616	10.7085	10.6612	11.051	11.0875	10.8741	11.0895	10.8025	11.1142	11.097	10.7394	11.1303	10.6211	11.0141	10.9721	10.8037	11.0929	10.9284
ENSG00000011275	RNF216	10.4713	10.5785	10.4956	10.4905	10.5008	10.5105	10.4884	10.5111	10.5821	10.5473	10.5054	10.495	10.5196	10.5629	10.5786	10.4359	10.4289	10.4868	10.382	10.503	10.4655	10.39	10.4634	10.4841	10.509	10.4353	10.4988	10.4876	10.486	10.3471
ENSG00000011295	TTC19	10.7805	10.9157	11.057	10.9508	10.9821	10.876	10.9002	10.9978	10.9079	10.864	10.7995	10.9104	10.945	10.8905	10.8932	11.0639	11.1243	11.0241	11.0664	11.1281	11.1063	11.0317	11.0563	11.0613	10.9083	10.8658	10.9488	10.9383	10.9492	11.1454
ENSG00000011304	PTBP1	13.7585	13.7919	13.6177	13.7838	13.712	13.674	13.7924	13.598	13.6613	13.7541	13.7663	13.7321	13.58	13.7653	13.8045	13.9146	13.8746	13.6342	13.9108	13.4717	13.8488	13.8025	13.54	13.8779	13.5078	13.9288	13.9083	13.6189	13.9377	13.3769
ENSG00000011332	DPF1	7.67759	7.75425	7.55159	7.72611	7.7841	7.78753	7.98456	7.84466	7.82885	7.7432	7.70639	7.8157	7.61298	7.82764	7.91219	7.31957	7.41704	7.69046	7.57988	7.79041	7.61168	7.53066	7.58185	7.86681	7.76387	7.67142	7.5217	7.77995	7.76532	7.58169
ENSG00000011347	SYT7	10.136	10.1112	10.0884	10.0892	10.1475	9.93472	10.0685	10.1362	10.0926	10.2419	10.2184	10.1008	10.1345	10.2716	10.274	9.94424	9.84001	10.1599	9.87032	9.96836	9.74484	9.8337	10.1753	9.96653	10.344	9.93175	9.89643	10.162	9.88706	10.1802
ENSG00000011376	LARS2	11.6595	11.6899	11.5158	11.6501	11.625	11.647	11.6493	11.5925	11.6169	11.6814	11.6118	11.7176	11.5496	11.7111	11.6966	11.7989	11.7273	11.6088	11.8164	11.4882	11.7777	11.7303	11.5364	11.7943	11.5799	11.8343	11.8338	11.634	11.8617	11.5308
ENSG00000011405	PIK3C2A	11.4725	11.5269	11.7473	11.6227	11.6452	11.6237	11.4475	11.6426	11.5926	11.6837	11.5568	11.5542	11.6228	11.4606	11.5147	11.436	11.5843	11.2632	11.4839	11.8239	11.4497	11.5714	11.7633	11.3544	11.5654	11.4517	11.4726	11.409	11.2694	11.9565
ENSG00000011422	PLAUR	4.74299	3.32893	4.08705	3.12069	3.04152	3.79112	3.56216	3.16732	4.07643	3.72094	4.42923	4.59463	4.50083	4.30378	3.9646	4.23103	4.15784	4.3124	3.68877	2.74937	4.54685	4.20066	3.77078	4.63724	4.19238	4.52048	3.86799	4.21575	3.28663	3.52921
ENSG00000011426	ANLN	11.8158	11.8523	11.8379	11.9012	11.7898	11.9205	11.7629	11.7089	11.7704	11.7764	11.8707	11.7905	11.8365	11.7924	11.7008	12.2406	12.2701	11.6716	12.2394	11.6879	12.19	12.2919	11.8017	12.1232	11.4483	12.2119	12.1925	11.6481	12.1946	11.614
ENSG00000011451	WIZ	11.5577	11.5726	11.4174	11.4866	11.4464	11.4182	11.5534	11.3899	11.4819	11.5409	11.5967	11.5018	11.3769	11.4707	11.5098	11.586	11.6162	11.4913	11.5229	11.4982	11.5336	11.4706	11.5392	11.5642	11.6242	11.6921	11.5779	11.5168	11.6685	11.3837
ENSG00000011454	RABGAP1	11.7466	11.7437	11.9255	11.8291	11.9099	11.821	11.7959	11.937	11.7906	11.9162	11.7908	11.7939	11.868	11.7747	11.8052	11.6955	11.6443	11.641	11.7041	11.8133	11.7321	11.7183	11.7914	11.7002	11.8157	11.6951	11.6887	11.699	11.6328	11.9174
ENSG00000011465	DCN	1.41311	0	0	0	0	0	0	0	0	0	0	1.14992	0	0	1.14905	1.82368	0	0	0	0	0.74675	1.58797	0	0	0	0	0	0	2.06517	0
ENSG00000011478	QPCTL	7.72939	7.59457	7.65444	7.50704	7.17458	7.6559	7.52983	7.3039	7.50321	7.42295	7.60257	7.76	7.37635	7.44657	7.60446	7.44052	7.42884	7.71794	7.28205	7.32486	7.60164	7.46118	7.35542	7.57173	7.37627	7.25874	7.66152	7.63152	7.78108	7.16349
ENSG00000011485	PPP5C	10.9784	10.9383	10.9008	10.9641	10.9026	11.0022	11.0458	10.9996	10.9179	11.0425	10.977	11.016	10.8601	11.0133	10.9635	11.0818	11.0545	11.0391	11.0283	10.854	10.9597	11.0354	10.8543	10.9992	10.8885	11.0756	11.0781	11.0627	11.1333	10.8226
ENSG00000011523	CEP68	8.91678	8.99751	8.97818	9.03735	9.00387	8.90029	8.91147	9.06943	8.82035	9.01934	8.83096	8.83578	8.8808	8.86491	9.10055	8.80738	8.99239	8.84797	9.1356	9.22915	9.07867	8.87384	8.92201	9.12339	9.06294	8.86577	9.12138	8.91737	9.09802	9.19538
ENSG00000011566	MAP4K3	8.83508	9.04462	9.14235	9.06872	9.05709	9.03884	8.97139	9.05145	9.0514	8.98505	8.87247	8.84345	9.19021	8.77128	9.03509	9.0821	9.06226	8.82919	9.08593	9.21069	9.14755	9.05888	9.18078	9.08486	9.05428	8.80114	9.05376	8.82096	8.95026	9.42772
ENSG00000011590	ZBTB32	3.343	1.70583	1.04708	0	0	2.07411	2.20287	0	2.11808	2.16406	2.81607	2.55485	2.14304	2.17493	1.78047	1.18264	0	2.31391	0	1.54007	1.89221	1.87775	1.42579	2.22487	1.83202	1.70964	2.13758	2.5567	0.844953	0.81001
ENSG00000011600	TYROBP	0	0	0	0	0	0	0	0	0	0	0	0	0	0	0	0	0	0	0	0	0	0	0	0	0	0	0	0	0	0
ENSG00000011638	TMEM159	9.15427	9.14603	9.1559	9.15648	9.15186	9.14493	9.1498	9.25052	8.99584	9.24099	9.08963	9.04001	9.0391	9.10489	9.19049	8.83171	8.87648	9.14733	8.78893	9.19433	8.68368	8.88612	8.98579	8.85516	9.17582	8.81333	8.84559	9.24219	8.85176	9.29735
ENSG00000011677	GABRA3	7.87447	7.79156	8.06386	7.91626	8.01679	7.92729	7.96389	8.08277	7.83414	8.17114	7.87925	7.74368	7.89425	7.81268	8.09034	7.18755	7.40513	7.69046	7.56182	7.77792	7.32492	7.3473	7.73818	7.45572	8.09295	7.34186	7.2183	7.71437	7.5493	8.01879
ENSG00000012048	BRCA1	11.3334	11.3606	11.4151	11.408	11.5158	11.4525	11.268	11.3419	11.3771	11.4899	11.3888	11.4006	11.3965	11.4043	11.344	11.7038	11.7303	11.1767	11.5823	11.2462	11.7037	11.7458	11.4346	11.588	11.1264	11.7033	11.6864	11.2675	11.6628	11.2887
ENSG00000012061	ERCC1	10.039	10.0949	9.8591	10.0841	10.0768	9.99724	10.1622	10.0041	9.98018	9.98363	10.0819	10.0286	9.867	9.96497	10.1215	9.84813	9.76283	10.2236	9.85372	10.009	9.66154	9.73072	9.81101	9.71066	10.0907	9.82984	9.95073	10.1571	9.92418	9.8827
ENSG00000012124	CD22	0.873071	0	0	0	0	0	0	0	1.41715	0	0	0	1.09692	1.74147	0	0	0	0.994993	0	0.966461	0	0	1.42579	0.940111	0	0	0.887572	0.983108	0	0
ENSG00000012171	SEMA3B	7.21126	7.22083	7.26197	7.18327	6.89661	7.15256	7.1452	7.63853	7.54252	7.37079	7.53837	7.30609	7.53538	7.46582	7.70048	6.76742	6.46038	7.09857	6.75565	7.15176	6.8443	6.93915	7.38483	7.18222	7.65354	7.15528	6.9473	7.52844	7.18893	7.7066
ENSG00000012174	MBTPS2	10.4492	10.5634	10.625	10.6441	10.5457	10.5435	10.4714	10.4327	10.4803	10.527	10.5102	10.5686	10.5991	10.5106	10.4897	10.702	10.723	10.5484	10.8201	10.7987	10.8464	10.6936	10.7315	10.7279	10.458	10.5779	10.5447	10.3465	10.5955	10.7867
ENSG00000012211	PRICKLE3	7.37198	7.45274	7.16882	7.55211	7.24507	7.20059	7.23997	7.20328	7.31926	7.70759	7.6726	7.48363	7.14051	7.47536	7.51124	7.52252	7.47512	7.26616	7.23726	7.08236	7.42507	7.21068	7.49684	7.45572	7.40924	7.76977	7.42511	7.35854	7.66135	7.10943
ENSG00000012223	LTF	5.02676	3.62185	5.04397	4.1954	5.30666	3.94942	4.64537	5.25767	4.65669	5.53177	4.42923	4.85984	5.39242	4.54013	4.66412	4.49751	4.26709	6.60478	4.56078	6.40864	4.54685	4.52788	6.09728	4.63724	6.6001	4.4721	4.52992	6.59572	4.38579	6.51391
ENSG00000012232	EXTL3	10.9508	10.9157	10.8112	10.8679	10.9473	10.8207	10.9119	10.8402	10.9185	11.0257	10.8505	10.9633	10.7603	10.9794	11.0008	10.8671	10.8688	10.6835	10.864	10.8041	10.8114	10.7713	10.7358	10.7846	10.8525	10.8728	10.8352	10.8894	10.868	10.7493
ENSG00000012504	NR1H4	0.873071	0	1.6474	0	0	2.07411	0	0	0	0.903374	0	0	0	0	0	0	0	0	0	0	0	0	0.882294	0	1.18914	0	0	1.5624	0	0
ENSG00000012660	ELOVL5	12.5155	12.5791	12.5676	12.4919	12.3857	12.5248	12.5089	12.4676	12.3818	12.3443	12.5014	12.578	12.6142	12.4859	12.3709	12.7072	12.6413	12.2909	12.4819	12.0136	12.7176	12.6442	12.3485	12.5204	11.7656	12.5992	12.4441	12.1791	12.3801	12.0272
ENSG00000012779	ALOX5	1.41311	1.09158	2.07006	2.2777	1.77027	2.07411	1.76665	2.31958	1.41715	1.85252	2.20959	0	1.09692	1.11894	1.14905	1.18264	0	0.994993	2.79652	2.52862	1.23635	1.87775	2.38309	2.22487	2.27516	2.25841	2.60889	1.5624	1.7607	2.64906
ENSG00000012817	KDM5D	9.93381	9.9929	10.1667	9.906	9.933	9.91806	9.90997	10.0501	9.98851	9.96867	9.96464	9.96664	9.93404	9.97677	9.98774	9.86591	9.81549	9.80216	9.89396	9.85849	9.81167	9.88256	9.93799	9.83341	9.87062	9.87357	9.91434	9.9604	9.91707	9.75521
ENSG00000012822	CALCOCO1	8.72315	8.86379	8.79636	8.64507	8.64404	8.62911	8.68176	8.92682	8.92818	8.80304	8.73192	8.84728	8.97524	8.6999	8.91285	8.15714	8.25598	8.87569	8.3633	8.60118	8.3112	8.45982	8.87614	8.44782	9.16621	8.53582	8.15871	8.86393	8.26836	8.99059
ENSG00000012963	UBR7	10.8235	10.8088	10.7329	10.8943	10.7833	10.735	10.7001	10.8095	10.669	10.7461	10.7619	10.7663	10.7102	10.8671	10.8095	11.0571	10.923	10.7382	11.0085	10.6195	11.0278	10.9628	10.6354	10.9882	10.4763	10.9416	11.0107	10.6682	10.9859	10.6541
ENSG00000012983	MAP4K5	9.93626	10.0088	10.1274	10.0439	10.072	10.0528	9.96302	10.0717	9.9706	9.97741	9.8765	9.95606	10.0671	9.87961	9.80539	10.129	10.0965	9.76477	10.0249	10.1232	10.0989	10.0347	10.0819	9.99018	9.79779	9.90124	10.0043	9.77983	9.87243	10.1508
ENSG00000013016	EHD3	9.3117	9.29374	8.86725	9.3582	9.11156	9.1773	9.38312	9.17946	9.2584	9.09017	9.34151	9.2682	8.9785	9.33434	9.20247	9.1352	9.22682	9.26611	9.26675	9.30074	9.24427	9.15679	9.17026	9.31244	9.36975	9.22087	9.29541	9.47386	9.32093	9.28869
ENSG00000013275	PSMC4	12.0865	12.0228	11.918	11.979	11.971	12.0293	12.1128	11.9148	11.9532	12.0507	12.0083	12.0242	11.8592	12.1049	12.0821	11.9268	11.9439	12.089	11.9438	11.8592	11.8181	11.9334	11.7952	11.9059	11.9769	12.0024	12.0525	11.9929	12.0403	11.7851
ENSG00000013288	MAN2B2	10.8517	10.9013	10.7374	10.8295	10.8704	10.695	10.9074	10.7782	10.8575	10.9369	10.8267	10.815	10.7782	10.8608	10.9024	10.3997	10.3642	10.6939	10.3283	10.5868	10.4048	10.3886	10.6392	10.3974	10.7098	10.4219	10.4285	10.6446	10.3917	10.5243
ENSG00000013293	SLC7A14	0.873071	0	0	0	0	0	0	0	0	0	1.14306	0	0	0	1.14905	0	0	0	0	0	0	0	0	0	0	0	0	0	0	0.81001
ENSG00000013297	CLDN11	0.873071	2.73452	1.6474	0.972514	2.81311	1.38152	3.03701	2.66049	2.37196	2.16406	2.20959	0	1.09692	1.11894	0	1.18264	1.92915	0.994993	1.13062	3.10975	0.74675	0	0	2.48372	1.83202	1.70964	1.82789	1.97459	0.844953	1.32564
ENSG00000013306	SLC25A39	12.2806	12.239	12.125	12.15	12.1956	12.1811	12.33	12.1543	12.104	12.1361	12.1823	12.191	12.0202	12.2501	12.2313	12.1297	12.2277	12.4517	12.1725	12.1455	12.1327	12.2092	12.0935	12.2258	12.232	12.3519	12.3695	12.4604	12.39	12.0149
ENSG00000013364	MVP	8.19824	8.17705	7.97493	8.09951	8.01006	7.89846	8.18843	8.16533	8.288	8.10882	8.41698	8.37223	8.40631	8.24481	8.43298	7.85084	7.79997	8.34755	8.08227	7.6467	8.09571	7.89323	8.24672	8.18637	8.21607	8.11913	8.04258	8.28354	8.08169	8.09628
ENSG00000013374	NUB1	10.5912	10.6195	10.7428	10.6284	10.6779	10.6205	10.6087	10.6574	10.5765	10.7277	10.5374	10.5801	10.7287	10.5796	10.6535	10.6276	10.6005	10.5721	10.6628	10.697	10.6083	10.6481	10.6099	10.6834	10.6932	10.602	10.6854	10.6008	10.6487	10.7341
ENSG00000013375	PGM3	9.99974	10.0371	9.98436	10.0066	10.129	10.1599	10.0024	10.1138	9.95975	10.0726	10.0311	9.94896	10.1168	10.0488	10.0404	10.1126	10.2052	9.9398	10.0767	10.1574	10.0425	10.1555	10.1097	10.0032	10.0451	10.1024	10.0443	9.85175	10.0745	10.2603
ENSG00000013392	RWDD2A	9.3763	9.49259	9.46758	9.37084	9.49815	9.58569	9.51924	9.51998	9.31436	9.52628	9.27834	9.27105	9.55379	9.38073	9.41038	9.1706	9.23357	9.29605	9.24712	9.58506	9.24104	9.29529	9.21598	9.23537	9.3026	9.3284	9.30901	9.17309	9.26228	9.37141
ENSG00000013441	CLK1	9.91529	9.9703	10.26	10.0187	10.1958	10.2233	9.92609	10.1362	10.0132	10.1487	9.93289	9.84571	10.0929	9.90099	10.0287	10.0008	10.0514	9.86342	10.0814	10.2405	10.0971	10.071	10.1509	10.0981	10.065	10.0185	10.057	9.86993	9.97871	10.3777
ENSG00000013503	POLR3B	10.7425	10.7427	10.7247	10.7495	10.6916	10.7418	10.6844	10.6382	10.6376	10.8333	10.7222	10.7714	10.8023	10.7756	10.6965	10.9058	10.9146	10.8125	10.955	10.7547	10.9229	10.9763	10.8712	10.8685	10.7169	10.8617	10.9085	10.735	10.927	10.7775
ENSG00000013523	ANGEL1	10.8075	10.8474	10.8129	10.8507	10.7843	10.7268	10.855	10.8255	10.7306	10.795	10.7936	10.7531	10.7013	10.8221	10.7798	10.7184	10.7122	10.6721	10.7738	10.5742	10.6703	10.666	10.7012	10.7846	10.6473	10.7495	10.7279	10.7878	10.7681	10.5758
ENSG00000013561	RNF14	10.4931	10.5634	10.6482	10.6415	10.6049	10.5105	10.4678	10.5754	10.4505	10.5464	10.5351	10.5358	10.7258	10.5094	10.5843	10.4827	10.6044	10.665	10.6817	10.666	10.6289	10.5948	10.5648	10.6656	10.4782	10.4727	10.4204	10.4837	10.5341	10.7045
ENSG00000013563	DNASE1L1	7.75738	8.19386	8.10355	8.18309	8.13287	7.93678	8.07732	7.98765	7.93607	8.02453	7.91581	7.94265	7.89425	7.97603	8.20194	7.88224	7.83588	8.33429	8.17425	7.99308	7.90484	7.76604	8.02178	8.16344	8.32662	8.08334	8.23803	8.30151	8.09436	8.08432
ENSG00000013573	DDX11	10.1232	10.2178	9.9874	10.1145	9.92765	10.0397	10.1862	10.198	10.3781	9.9799	10.3091	10.2812	10.1591	10.1886	10.1434	10.453	10.3237	10.1872	10.267	9.75078	10.5017	10.3893	10.3079	10.4285	9.98347	10.5815	10.4373	10.3356	10.5106	9.87114
ENSG00000013583	HEBP1	9.76896	9.72051	9.59637	9.82567	9.78116	9.60961	9.61739	9.5789	9.59084	9.71142	9.71371	9.6274	9.63043	9.88319	9.80931	9.8521	9.90695	9.74152	9.77168	9.69376	9.71022	9.73072	9.69691	9.76803	9.66076	9.74457	9.70988	9.73093	9.88706	9.68434
ENSG00000013588	GPRC5A	1.80516	1.70583	0	1.5482	1.77027	2.07411	3.56216	1.22072	2.11808	2.16406	1.77272	1.14992	1.09692	0	1.78047	0	1.26553	0.994993	1.75662	1.54007	0	2.11895	1.42579	0	2.07054	0.813057	2.60889	1.97459	2.06517	0
ENSG00000013619	MAMLD1	3.56197	2.96097	3.25259	2.2777	3.04152	2.54009	2.80871	3.16732	2.11808	3.51667	3.24175	3.72139	1.71279	2.77808	3.05417	1.82368	2.38197	3.3129	2.19175	2.26789	2.95979	1.22497	3.67878	1.50454	3.85218	2.00996	3.59106	2.5567	2.71665	3.43188
ENSG00000013725	CD6	0.873071	0	0	0	0	0	0	0	0	0	0	0	0	0	0	0	0	0	0	0	0	0	0	0	0	0	0.887572	0	0	0
ENSG00000013810	TACC3	11.9595	11.9039	11.5749	11.8752	11.6727	11.8255	12.0043	11.6257	11.9063	11.7736	12.0268	12.0225	11.6415	12.0617	11.9243	12.275	12.2656	11.8468	12.2896	11.4069	12.3482	12.2594	11.831	12.2976	11.7518	12.4298	12.4052	12.0063	12.4257	11.5867
ENSG00000014123	UFL1	10.3181	10.4124	10.7018	10.5125	10.6608	10.5726	10.321	10.4711	10.4182	10.5329	10.3578	10.3901	10.6633	10.391	10.4676	10.4904	10.6467	10.4078	10.5631	10.827	10.5245	10.5696	10.6323	10.4832	10.5341	10.4211	10.4453	10.271	10.5255	10.8616
ENSG00000014138	POLA2	10.8646	10.7177	10.551	10.7242	10.7104	10.7539	10.8653	10.7007	10.7063	10.6602	10.8199	10.7694	10.5724	10.8061	10.6655	11.0389	10.9923	10.7306	10.9324	10.3072	10.9254	10.9531	10.6589	10.9241	10.3297	10.9955	11.0095	10.7449	11.0017	10.1979
ENSG00000014164	ZC3H3	9.86214	9.83927	9.62588	9.86639	9.65524	9.62729	9.82844	9.44208	9.77953	9.71142	9.79642	9.85713	9.64075	9.87781	9.86689	9.73013	9.75582	9.57494	9.65732	9.55975	9.69024	9.61368	9.49759	9.67381	9.66986	9.76605	9.73023	9.55477	9.81237	9.42929
ENSG00000014216	CAPN1	11.859	11.9313	11.6544	11.8529	11.7494	11.7748	11.9312	11.7728	11.8555	11.868	11.8763	11.8865	11.8019	11.927	11.9871	11.5245	11.5407	11.8252	11.5024	11.6757	11.473	11.4962	11.7146	11.5962	11.8881	11.5591	11.5495	11.8298	11.6432	11.7263
ENSG00000014257	ACPP	9.33418	9.46514	9.82219	9.3582	9.78904	9.28518	9.32755	9.81458	9.33876	9.90722	9.27553	9.27673	9.77622	9.40587	9.7473	8.75322	8.56498	9.36719	8.80052	9.6064	8.48233	8.63021	9.39832	8.72026	9.64815	8.63803	8.62417	9.49158	8.93391	9.67639
ENSG00000014641	MDH1	11.4165	11.4415	11.4941	11.4656	11.3418	11.4516	11.3828	11.3827	11.3164	11.3993	11.3331	11.4467	11.5141	11.3696	11.412	11.6014	11.702	11.7302	11.7719	11.6151	11.6611	11.7034	11.4446	11.6794	11.4816	11.5699	11.643	11.494	11.771	11.6847
ENSG00000014824	SLC30A9	11.6132	11.7631	11.8952	11.7963	11.7789	11.8158	11.6611	11.7106	11.6597	11.8429	11.659	11.6726	11.913	11.6487	11.7077	11.7953	11.9294	11.8441	11.9577	12.1592	11.8835	11.96	11.9703	11.8952	11.8436	11.7792	11.8223	11.6781	11.9198	12.1969
ENSG00000014914	MTMR11	6.33681	6.19749	6.35829	6.21202	6.35358	6.55634	6.43117	6.18693	6.34319	6.05056	6.05003	5.95305	5.93936	5.83921	6.18673	5.58456	5.22913	5.41647	5.88964	5.74072	5.83983	5.75038	5.56626	5.49494	5.87302	5.79439	6.29196	5.55169	5.65434	5.70651
ENSG00000014919	COX15	10.2954	10.3462	10.3178	10.3443	10.3962	10.3225	10.3611	10.3321	10.2729	10.3783	10.2995	10.3078	10.3259	10.3306	10.1802	10.4385	10.3269	10.411	10.3999	10.4439	10.4523	10.4304	10.3327	10.3716	10.2912	10.3256	10.4088	10.3214	10.3536	10.4116
ENSG00000015133	CCDC88C	10.177	10.3145	9.97063	10.0079	9.88965	10.0484	10.1622	10.2029	10.7677	9.85258	10.8343	10.7316	10.5474	10.7871	10.2146	10.3059	10.423	10.1699	10.2698	9.49827	10.5305	10.3712	10.5697	10.5116	10.0924	10.433	10.2476	10.1133	10.1733	9.83947
ENSG00000015153	YAF2	8.39282	8.40114	8.4098	8.30661	8.41862	8.5071	8.67329	8.58078	8.50587	8.37023	8.35443	8.38281	8.43982	8.27241	8.25466	8.54826	8.32077	8.32539	8.45906	8.43216	8.50943	8.61798	8.55239	8.63947	8.33808	8.35085	8.38467	8.44185	8.27579	8.53462
ENSG00000015171	ZMYND11	11.2223	11.1951	11.2424	11.2855	11.3957	11.2918	11.2172	11.2691	11.2167	11.34	11.1897	11.1902	11.2429	11.1712	11.3085	11.1877	11.1124	11.1958	11.2685	11.419	11.2409	11.1379	11.2885	11.2047	11.428	11.0413	11.1671	11.2157	11.1998	11.6021
ENSG00000015285	WAS	3.99711	5.07901	4.17485	4.3395	4.34266	4.22185	4.15529	4.47832	4.33711	4.26897	4.42923	4.07444	4.08284	4.21553	4.35635	4.32543	4.79072	4.23843	3.39454	4.51998	4.91429	4.20066	4.84945	4.92589	4.42511	4.78097	4.52992	4.96709	4.38579	3.86374
ENSG00000015413	DPEP1	1.80516	1.09158	0	0.972514	0	0	1.13836	0	0	0	0	1.14992	0	1.11894	0	0	0	0.994993	0	0	0	0	0	0	0	0.813057	0.887572	0	0.844953	0.81001
ENSG00000015475	BID	8.77883	8.7846	8.89013	8.95583	8.67841	8.90995	8.92579	8.69172	8.78254	8.70715	8.67761	8.7196	8.802	8.86853	8.82648	8.6152	8.85477	9.12954	8.68435	8.88646	8.7825	8.81935	8.65857	8.75134	8.78378	8.8374	8.86676	8.91737	8.92212	8.74932
ENSG00000015479	MATR3	13.5808	13.6532	13.7112	13.7002	13.643	13.6945	13.5598	13.6267	13.6333	13.6763	13.6381	13.6694	13.7223	13.629	13.6396	13.8363	13.8453	13.569	13.8665	13.6866	13.8095	13.8397	13.7129	13.7786	13.5459	13.7858	13.779	13.533	13.8079	13.74
ENSG00000015520	NPC1L1	3.99711	2.96097	3.25259	1.95857	3.70663	3.61329	3.23407	3.16732	3.34882	2.8264	3.4152	4.07444	4.17669	3.52943	3.9646	2.60399	3.61274	3.57577	2.52559	3.39786	2.13423	3.37331	3.85727	2.22487	4.14096	2.25841	2.7971	2.77827	2.71665	3.21497
ENSG00000015532	XYLT2	9.00582	8.89498	8.46309	8.70285	8.8503	8.90513	9.08106	8.85816	9.22858	8.71911	9.20343	9.09572	9.08823	9.28912	8.98396	8.72318	8.91476	8.91183	8.8828	8.29866	8.92415	8.98083	9.03533	8.95735	8.95729	8.93657	8.90819	8.89978	8.90545	8.63917
ENSG00000015568	RGPD5	1.41311	1.09158	2.07006	0.972514	2.54161	1.38152	2.80871	2.31958	2.37196	2.16406	2.81607	1.78159	2.74306	0	1.14905	2.87766	1.26553	1.57828	1.75662	0.966461	1.23635	2.11895	1.42579	0.940111	1.83202	2.00996	2.60889	0	0	0
ENSG00000015592	STMN4	3.75204	3.32893	4.61233	4.03528	4.25428	3.61329	3.56216	4.78725	4.07643	4.50848	4.25756	3.25295	3.75795	3.52943	3.71993	3.1076	2.38197	3.45031	2.79652	3.93646	3.39123	3.7046	3.77078	2.8935	3.71827	3.33388	2.96356	4.13785	3.16383	3.52921
ENSG00000015676	NUDCD3	11.2668	11.2451	11.2258	11.2368	11.2114	11.2246	11.313	11.2144	11.3193	11.2997	11.3324	11.2863	11.2382	11.3696	11.2606	11.3502	11.366	11.3721	11.3137	11.1604	11.2983	11.3236	11.3222	11.2939	11.3241	11.3715	11.3441	11.4027	11.3429	11.2861
ENSG00000016082	ISL1	3.66013	3.32893	3.25259	2.95155	2.54161	3.17426	2.53736	3.54164	3.66608	2.8264	2.20959	3.58149	2.47402	3.52943	3.05417	4.02138	3.23648	4.07802	3.22136	2.74937	3.48157	2.81122	2.59928	3.88559	3.00736	2.4703	2.3924	4.21575	3.28663	2.25281
ENSG00000016391	CHDH	11.0486	11.0595	10.8984	10.9855	11.0591	10.8698	11.0417	11.0728	10.9469	11.0754	11.0577	11.016	11.007	11.1152	11.1161	10.9416	10.9692	10.9637	10.8878	10.7411	10.8939	10.9041	10.8803	10.9424	10.8895	10.9532	10.9654	11.0448	10.9825	10.8831
ENSG00000016402	IL20RA	4.20654	3.32893	3.08141	3.12069	2.54161	4.45091	2.80871	2.93605	3.09044	3.89985	3.04455	2.55485	3.63107	3.91289	2.82546	3.30588	3.43684	4.38276	2.52559	4.39471	3.86395	3.54844	3.10261	2.70311	4.03228	4.78097	3.11279	2.2948	3.78024	3.70615
ENSG00000016490	CLCA1	0.873071	0	0	0	0	0	1.13836	0	0	0.903374	0	0	0	0	0	0	0	0	0	0	0	0	0	0	0	0	0	0	0	0
ENSG00000016602	CLCA4	0	0	0	0	1.77027	0	0	0	0	0	0	0	0	0	0	0	0	0	0	0	0	0	0	0	0	0	0	0	0	0
ENSG00000016864	GLT8D1	10.0895	10.1156	10.1893	10.1319	10.2179	10.1334	10.0408	10.1616	9.96458	10.1641	10.0042	10.0668	10.1819	10.0472	10.2482	10.2528	10.1948	10.1637	10.154	10.3772	10.3239	10.207	10.0672	10.2098	10.2062	10.2077	10.1463	10.1183	10.2788	10.2849
ENSG00000017260	ATP2C1	11.434	11.4705	11.6958	11.4793	11.5193	11.543	11.3252	11.5572	11.4221	11.5081	11.4746	11.4104	11.6497	11.4767	11.4984	11.5126	11.5677	11.5503	11.5006	11.6829	11.5666	11.5682	11.7066	11.5936	11.5525	11.4559	11.4553	11.4694	11.5152	11.8237
ENSG00000017427	IGF1	7.42879	7.27451	7.44968	7.50704	7.29022	7.63275	7.39217	7.59947	7.32679	7.49433	7.64674	7.11634	7.32604	7.27161	7.21276	7.8106	7.48646	7.26616	7.71669	7.40012	7.86344	7.88509	7.33296	7.85541	7.25456	8.09137	7.94642	7.19506	7.72246	7.52972
ENSG00000017483	SLC38A5	1.41311	3.15665	1.6474	1.95857	2.81311	2.07411	1.76665	2.31958	1.41715	1.45463	1.77272	2.21942	2.14304	2.77808	1.78047	2.26596	1.92915	1.99248	2.79652	2.74937	2.52257	2.81122	1.81963	0.940111	1.18914	2.00996	2.60889	2.2948	2.71665	2.25281
ENSG00000017797	RALBP1	10.9483	11.0526	11.0219	11.0386	10.9116	11.0257	10.9949	10.9384	11.0584	10.986	11.1225	11.0767	11.1013	11.0983	11.0711	11.2218	11.1968	11.0601	11.1847	10.8398	11.2513	11.2625	11.1631	11.2635	11.0378	11.2395	11.1883	11.0791	11.2336	11.0472
ENSG00000018189	RUFY3	9.65603	9.67731	9.91115	9.67418	9.71026	9.61553	9.54962	9.68765	9.689	9.74401	9.71786	9.52608	9.55598	9.56612	9.60341	9.77473	9.60009	9.32314	9.46189	9.64817	9.61115	9.66569	9.49253	9.62765	9.51692	9.57311	9.65465	9.39861	9.51554	9.66037
ENSG00000018236	CNTN1	0	0	0	0	0	0	0	0	0	0	0	1.14992	0	0	0	0	0	0	0	0.966461	0	1.22497	0	0	0	1.70964	0	0	0	0
ENSG00000018280	SLC11A1	5.5719	5.53117	5.37577	5.4376	5.87942	5.18266	5.65116	5.89597	5.52687	5.58507	5.62467	5.70595	5.57586	5.68343	5.7377	4.97626	4.63637	6.09864	5.19715	5.864	4.81354	5.26492	5.45971	4.52658	5.87302	5.55988	5.44304	5.98891	5.72119	5.97187
ENSG00000018408	WWTR1	5.73845	5.60007	6.22067	5.8996	5.47253	5.83768	5.46751	6.26389	5.36085	5.55867	5.94073	6.28167	6.01753	5.12864	5.52527	6.29397	6.06599	5.66259	6.00101	5.06339	6.13251	6.15419	5.6413	5.55255	4.6984	5.97884	5.81388	5.35915	5.7428	4.77415
ENSG00000018510	AGPS	9.81896	9.78481	10.0612	9.91178	10.0541	10.1147	9.72165	10.041	9.82939	10.036	9.93645	9.9001	10.1257	9.80408	10.0287	10.0221	9.99495	10.004	10.0878	10.3689	10.1184	10.0347	10.0942	10.0514	10.0676	9.92727	10.0054	9.96464	9.95228	10.402
ENSG00000018607	ZNF806	3.66013	4.0734	3.8936	3.85515	4.34266	2.54009	3.03701	3.16732	3.34882	3.40256	3.95436	3.72139	3.63107	3.00563	4.17373	2.87766	3.91088	3.45031	3.22136	4.32775	3.19158	3.97385	3.85727	3.47319	4.38147	3.22129	2.7971	3.77582	4.01149	4.69245
ENSG00000018610	CXorf56	9.60456	9.57191	9.6662	9.57027	9.55012	9.70427	9.55424	9.5814	9.5367	9.72038	9.53018	9.54269	9.50713	9.56612	9.57835	9.78308	9.63618	9.79733	9.83129	9.85701	9.7437	9.7875	9.68956	9.84498	9.68564	9.64716	9.83331	9.73093	9.80211	9.64552
ENSG00000018625	ATP1A2	0.873071	1.09158	0	1.5482	0	1.38152	1.13836	0	0.876006	0	1.77272	0	0	1.11894	0	0	0	1.57828	0	0	0	0.738771	0	1.90921	0	1.3299	2.3924	0	0	1.32564
ENSG00000018699	TTC27	9.63506	9.66128	9.66051	9.74384	9.65308	9.6734	9.65442	9.46671	9.55284	9.59447	9.60597	9.57763	9.6325	9.61867	9.62359	10.0115	9.9506	9.63384	10.038	9.7152	9.93471	9.8284	9.63552	9.89317	9.45511	9.82383	9.77011	9.49354	9.93361	9.6264
ENSG00000018869	ZNF582	7.5869	7.37623	7.73608	7.42863	7.75218	7.26223	7.45278	7.60933	7.51643	7.67724	7.17801	7.33905	7.56171	7.51287	7.40123	7.23697	7.33158	7.43297	7.17924	7.6467	7.26258	7.66508	7.46277	7.23596	7.58305	7.38823	7.38164	7.33255	7.48664	7.76272
ENSG00000019102	VSIG2	1.41311	2.13528	0	1.5482	0	0	0	1.87233	2.11808	1.45463	1.77272	0	1.09692	2.17493	1.14905	2.26596	1.26553	1.99248	1.13062	0	1.23635	1.58797	0.882294	2.22487	0.713771	2.00996	0	1.97459	2.31644	0.81001
ENSG00000019144	PHLDB1	7.86421	7.84221	7.34001	7.53724	7.17458	7.49831	7.68105	7.68591	7.91625	7.50819	8.19699	7.96394	8.08181	8.11057	7.8063	7.42993	7.66675	7.81019	7.48727	7.33342	7.76344	7.89323	8.03111	8.03289	7.95834	7.73943	7.6915	7.8549	7.68387	7.89186
ENSG00000019169	MARCO	0	0	0	0	0	0	0	0	0	0	1.14306	0	0	0	0	0	0	0	0	0	0	0	0	0	0	0	0	0	0	0
ENSG00000019186	CYP24A1	0	0	0	0	0	0	0	0	0.876006	0	0	0	0	0	0	0	0	0.994993	0	0	0	0	0	0	0	0	0	0	0	0
ENSG00000019485	PRDM11	6.58192	6.40429	6.09127	6.54499	6.24311	6.60474	6.56533	6.07748	6.48447	6.69643	6.64524	6.75854	6.43334	6.41574	6.25732	6.09392	5.9723	6.23803	5.97396	6.0624	6.13251	6.08482	5.92777	6.02917	6.18368	6.24671	5.85684	6.34147	6.21434	6.35041
ENSG00000019505	SYT13	1.80516	2.73452	1.6474	1.95857	1.77027	0	2.20287	1.22072	0.876006	1.45463	1.14306	1.14992	1.09692	0	2.21818	0	1.26553	1.57828	2.52559	1.9494	1.60123	0.738771	1.81963	1.50454	2.07054	0.813057	1.43302	0	0	1.70473
ENSG00000019549	SNAI2	5.49418	5.26024	4.54802	4.59061	4.42593	5.30488	5.84453	4.91999	5.27008	3.72094	5.72696	5.7718	4.70362	5.26679	4.7318	6.06685	6.00421	4.69079	5.56656	4.32775	6.29081	6.20739	5.21964	5.83388	3.57064	6.11111	6.03572	5.09628	5.65434	4.6498
ENSG00000019582	CD74	0.873071	1.09158	1.6474	0	1.77027	1.38152	1.76665	1.22072	1.41715	2.16406	0	0	0	0	1.14905	1.82368	1.92915	0	1.13062	0	0.74675	0	0	0	0.713771	0	0	0.983108	0	0
ENSG00000019991	HGF	1.41311	0	0	0	0	0	0	0	0	0	0	0	0	0	0	0	0	0	0	0	0	0	0	0	0	0	0	0	0	0
ENSG00000019995	ZRANB1	9.84789	9.81954	10.0248	9.9031	9.97681	9.86441	9.81311	10.0355	9.86343	9.91114	9.79446	9.805	9.9852	9.84694	9.84413	9.93492	9.85102	9.8386	10.0364	9.97385	10.0144	9.90788	9.92052	9.93167	9.96141	9.92502	9.94577	9.93472	9.93008	10.0943
ENSG00000020129	NCDN	11.2624	11.2894	10.9514	11.2374	11.2238	11.2227	11.3143	10.9987	11.2704	11.2098	11.3058	11.1872	10.9383	11.3122	11.3085	11.2545	11.2368	11.2994	11.265	11.189	11.2469	11.2166	11.2802	11.3165	11.4787	11.3156	11.3044	11.3648	11.3652	11.2014
ENSG00000020181	ADGRA2	4.82992	5.26024	4.48071	3.94803	4.90372	4.82233	4.95572	4.0847	4.55782	5.19723	5.2654	5.23153	5.08875	4.80494	4.97463	4.72237	4.9951	5.66259	5.10042	4.97862	5.15293	4.86234	5.59171	5.43493	5.51746	5.16265	5.38553	4.49107	4.81101	5.15576
ENSG00000020219	CCT8L1P	1.41311	0	1.04708	1.5482	0	2.07411	0	2.31958	0	0.903374	0	0	0	0	0	0	0	0	0	0.966461	0	0.738771	0	0	0	0.813057	0	0	0	0.81001
ENSG00000020256	ZFP64	9.66935	9.7662	9.70358	9.59741	9.71647	9.52726	9.78195	9.7514	9.64903	9.76869	9.54892	9.74683	9.68135	9.62297	9.66096	9.61803	9.64633	9.66064	9.66368	9.49446	9.67356	9.6296	9.55533	9.69795	9.7101	9.63485	9.68327	9.74905	9.69116	9.61536
ENSG00000020426	MNAT1	8.79243	8.74331	8.97818	8.95862	8.93447	8.84092	8.73153	8.95804	8.87528	8.86899	8.80391	8.76477	9.06388	8.8319	8.73873	8.98058	8.92313	8.91183	9.02135	9.17779	9.14583	9.04798	9.04687	9.13522	8.91009	8.87045	8.8322	8.83337	9.05331	9.24995
ENSG00000020577	SAMD4A	5.09855	6.03279	5.64535	5.26784	5.78795	5.71076	5.65116	5.44559	5.20623	5.61099	4.84775	5.03098	5.82807	5.65016	5.48661	5.14109	4.63637	5.38253	5.10042	5.66136	4.94637	4.68616	5.68925	4.83594	5.59593	4.20237	4.77357	5.61056	4.92883	5.97187
ENSG00000020633	RUNX3	2.76996	0	0	1.5482	0	0	0	0	1.41715	0	1.14306	0	1.09692	0	0	0	0	0	0	0	0	0	0	0	0.713771	0	0	0.983108	0	0.81001
ENSG00000020922	MRE11	9.59063	9.61	9.7472	9.818	9.67452	9.70981	9.56343	9.76028	9.64903	9.72632	9.53254	9.61399	9.84573	9.62297	9.62804	10.0203	9.92165	9.63564	10.1034	9.72337	10.0882	10.0611	9.75015	10.0527	9.53072	9.96818	9.97165	9.46391	9.93596	9.89302
ENSG00000021300	PLEKHB1	12.3245	12.2924	12.2803	12.2818	12.2945	12.2412	12.3185	12.2669	12.2227	12.2945	12.1695	12.2543	12.2467	12.2326	12.3824	11.6744	11.7645	12.2702	11.913	12.2259	11.68	11.743	11.9985	11.8032	12.2374	11.7909	11.9043	12.1681	11.9118	12.0708
ENSG00000021355	SERPINB1	0.873071	0	1.04708	0	1.14117	0	0	0	0	0	0	0	0	0	0	1.82368	1.92915	0	0	0	0	0.738771	0	0	0	0.813057	0	0	0	0
ENSG00000021461	CYP3A43	3.343	3.32893	4.08705	2.95155	3.23866	3.41041	4.15529	3.54164	3.4625	3.27863	3.4152	1.14992	2.74306	2.5078	2.21818	2.87766	3.00374	2.31391	2.79652	4.10591	3.72292	2.50622	3.5805	3.34862	3.57064	3.33388	2.60889	2.5567	3.78024	2.81266
ENSG00000021488	SLC7A9	4.2701	4.33831	3.99357	4.64711	4.16014	4.09205	4.05459	4.29489	4.6081	3.98161	5.01884	3.84892	2.74306	4.02098	3.71993	3.63566	4.03964	3.57577	2.19175	3.52287	2.82824	2.81122	4.2893	3.34862	4.14096	3.09918	4.0269	3.42857	2.8816	3.21497
ENSG00000021574	SPAST	9.61837	9.62454	9.72555	9.68096	9.65092	9.69871	9.66086	9.55102	9.59552	9.69637	9.48223	9.70319	9.61584	9.65687	9.6413	9.57303	9.6079	9.50568	9.68051	9.76667	9.63595	9.63689	9.5682	9.57475	9.41509	9.43794	9.38801	9.51681	9.45299	9.84302
ENSG00000021645	NRXN3	2.93592	1.70583	2.88715	2.75991	3.23866	2.89174	3.23407	3.36658	2.11808	3.81317	3.04455	2.21942	3.75795	3.20213	2.21818	3.77601	2.7261	2.57661	2.79652	3.26099	2.68349	3.17393	3.93887	2.48372	2.45433	1.70964	3.11279	2.2948	3.28663	2.00464
ENSG00000021762	OSBPL5	10.6021	10.608	10.236	10.4671	10.3962	10.462	10.6109	10.4272	10.7753	10.6024	10.7877	10.8901	10.5605	10.9161	10.7321	10.638	10.7073	10.6347	10.6056	10.017	10.7817	10.6396	10.6566	10.7748	10.5247	10.8194	10.63	10.6108	10.6847	10.2577
ENSG00000021776	AQR	11.2303	11.2953	11.4622	11.4374	11.4477	11.3471	11.2952	11.3588	11.2902	11.4428	11.3072	11.3094	11.4713	11.2792	11.2931	11.4538	11.5291	11.1847	11.5415	11.5124	11.4979	11.524	11.4624	11.3948	11.2204	11.4053	11.4042	11.124	11.3674	11.5305
ENSG00000021826	CPS1	8.83771	8.74331	9.11487	8.8783	9.02072	8.65232	8.84894	9.0369	8.74652	9.10164	8.74823	8.80071	9.07306	8.93912	8.98049	8.83171	8.79673	9.0668	8.81584	9.35429	8.78472	8.56037	9.18914	8.72653	9.21052	8.77396	8.67905	9.20686	8.88129	9.41185
ENSG00000021852	C8B	2.11311	0	0	0	0	0	0	0	0	0.903374	0	0	0	0	0	0	0	0	0	0	0	0	0	0	0.713771	0	0	0	0	0
ENSG00000022267	FHL1	1.41311	0	0	0.972514	0	0	0	0	0.876006	0	0	0	0	0	0	0	1.26553	0	1.13062	1.54007	1.89221	0	0	0.940111	0	0	0.887572	1.97459	1.3743	0
ENSG00000022277	RTF2	10.4474	10.4995	10.4491	10.3823	10.4193	10.3758	10.4616	10.4765	10.3414	10.3651	10.3776	10.5263	10.5016	10.443	10.4209	10.4293	10.5323	10.6257	10.6	10.5077	10.446	10.4567	10.3317	10.4485	10.5366	10.5211	10.534	10.4669	10.5449	10.5715
ENSG00000022355	GABRA1	1.41311	1.09158	0	0.972514	0	1.38152	0	0	0	0.903374	1.77272	0	0	0	1.14905	0	1.26553	0	0	0	0	0	0	0	0	0	0.887572	0	0	0
ENSG00000022556	NLRP2	10.2159	10.0814	10.0129	10.1613	10.0143	10.1539	10.2069	9.9194	10.1468	10.09	10.1294	10.1573	10.0315	10.3174	10.1787	10.1899	10.0495	10.1423	10.2502	9.93782	10.1131	10.1496	9.9711	10.1173	10.1075	10.1693	10.1816	10.1347	10.2251	10.1229
ENSG00000022567	SLC45A4	8.88161	8.95539	8.71815	8.7648	8.74883	8.92433	8.79923	8.7419	8.8855	8.80304	8.98685	8.97509	8.89122	8.85034	8.85711	8.60582	8.73627	8.58618	8.6591	8.79336	8.72356	8.53718	8.78806	8.78178	8.86326	8.64077	8.72325	8.69741	8.67475	8.74427
ENSG00000022840	RNF10	12.6386	12.586	12.599	12.5982	12.6518	12.5423	12.6563	12.62	12.5409	12.681	12.5766	12.5484	12.5755	12.636	12.6964	12.5158	12.5285	12.6564	12.5421	12.6618	12.4832	12.4908	12.6081	12.4873	12.7659	12.5349	12.5162	12.7247	12.6048	12.6522
ENSG00000022976	ZNF839	9.5797	9.56977	9.57636	9.49916	9.53847	9.65341	9.5839	9.65706	9.5924	9.50051	9.57658	9.41454	9.36734	9.45005	9.55285	9.4183	9.38668	9.46976	9.45945	9.47525	9.42019	9.38893	9.4073	9.47398	9.58583	9.39803	9.5308	9.52257	9.44642	9.50003
ENSG00000023041	ZDHHC6	10.2108	10.2861	10.2423	10.3968	10.2222	10.2933	10.2686	10.119	10.1668	10.1487	10.2431	10.2556	10.1432	10.2496	10.0896	10.5081	10.5768	10.3661	10.5483	10.3678	10.5696	10.4913	10.27	10.497	10.1496	10.4534	10.534	10.227	10.4844	10.2971
ENSG00000023171	GRAMD1B	0.873071	2.13528	2.39654	0	1.14117	0	0	2.31958	1.80977	0.903374	0	0	0	0	2.21818	0	0	0.994993	0	0	0.74675	0	0	0	0.713771	0	0	0	0	0
ENSG00000023191	RNH1	11.0429	11.0137	10.8542	10.9543	10.8935	10.9017	11.1209	10.9285	10.9511	10.9446	10.9691	10.9929	10.8115	10.9919	11.0857	11.038	10.9813	11.2521	11.0373	10.8585	11.026	11.0336	10.998	11.1113	11.0777	11.2218	11.1527	11.1227	11.1607	10.8481
ENSG00000023228	NDUFS1	12.3229	12.305	12.3664	12.2952	12.3004	12.3099	12.2543	12.2958	12.2315	12.3552	12.2917	12.3039	12.3419	12.3076	12.3288	12.4144	12.3802	12.3085	12.3892	12.4137	12.3755	12.3948	12.275	12.333	12.3202	12.376	12.3751	12.2834	12.4032	12.3538
ENSG00000023287	RB1CC1	10.3275	10.345	10.7419	10.472	10.6468	10.5848	10.3385	10.5552	10.3255	10.6485	10.3604	10.3663	10.6964	10.2934	10.5866	10.5392	10.6314	10.3758	10.6111	10.9187	10.6313	10.6263	10.7099	10.5842	10.6223	10.3459	10.4792	10.34	10.3934	11.0456
ENSG00000023318	ERP44	10.4534	10.5307	10.6539	10.5675	10.596	10.5983	10.4293	10.5917	10.4912	10.5927	10.5904	10.5973	10.6934	10.4954	10.6437	10.8039	10.7817	10.7264	10.8048	10.8503	10.8701	10.8382	10.7301	10.7725	10.5716	10.6104	10.6484	10.5687	10.67	10.9566
ENSG00000023330	ALAS1	11.4305	11.4202	11.5026	11.3497	11.3249	11.3417	11.4654	11.6646	11.3046	11.3783	11.3003	11.379	11.5419	11.3917	11.4101	11.2325	11.2879	11.4943	11.2368	11.2296	11.1598	11.2138	11.3881	11.2075	11.2559	11.2117	11.2661	11.4569	11.2984	11.217
ENSG00000023445	BIRC3	6.29158	6.42342	6.6767	6.61747	6.80625	6.62834	6.36963	6.51542	6.29796	6.44581	6.37811	6.25888	6.4142	6.37558	6.4901	6.56945	6.12523	6.46581	6.65707	7.19936	6.624	6.4474	6.71048	6.38682	6.52187	6.30312	6.67465	6.28837	6.44278	6.95158
ENSG00000023516	AKAP11	11.6717	11.7437	11.9172	11.8431	11.8395	11.7827	11.6401	11.7378	11.76	11.8405	11.7412	11.7187	11.8685	11.6644	11.7145	11.7896	11.7956	11.5052	11.8126	11.9205	11.8382	11.8141	11.9232	11.743	11.6944	11.6775	11.6579	11.5977	11.6695	11.9937
ENSG00000023572	GLRX2	8.50605	8.68503	8.79636	8.90171	8.78477	8.97584	8.71513	8.58579	8.5354	8.50768	8.65183	8.79676	8.79831	8.70801	8.55009	9.0821	9.15757	8.87569	9.11408	8.57976	9.38405	9.32417	8.51297	9.17475	8.11976	9.08872	8.85622	8.33244	8.82161	8.60329
ENSG00000023608	SNAPC1	7.32037	7.47125	7.50154	7.33715	7.62579	7.73414	7.37138	7.48626	7.44906	7.43025	7.42119	7.47377	7.66248	7.38721	7.3483	7.56184	7.62631	7.29381	7.48727	7.39195	7.6266	7.59195	7.22324	7.41747	7.3138	7.71365	7.58055	7.22363	7.59755	7.43869
ENSG00000023697	DERA	9.18552	9.36724	9.49981	9.3582	9.43422	9.36462	9.35692	9.35389	9.2185	9.4725	9.27553	9.3378	9.36983	9.36287	9.40262	9.26594	9.4255	9.46572	9.54464	9.44199	9.4044	9.50899	9.35252	9.40918	9.28198	9.36198	9.48362	9.22817	9.46279	9.56316
ENSG00000023734	STRAP	12.0843	12.1567	12.2103	12.2582	12.1915	12.2611	12.0508	12.0621	12.1367	12.2319	12.1112	12.2278	12.2239	12.1804	12.1252	12.3119	12.3456	12.229	12.4327	12.418	12.4342	12.3795	12.3061	12.398	12.2389	12.278	12.32	12.1688	12.3388	12.4533
ENSG00000023839	ABCC2	3.21964	2.96097	4.2576	3.27207	3.95113	3.17426	2.80871	4.0847	3.09044	3.81317	4.1634	3.25295	3.16556	3.91289	4.26793	3.48017	3.91088	2.99123	3.54914	2.94079	2.95979	3.8455	3.23772	3.97258	3.91474	3.87034	3.11279	2.5567	3.93845	3.43188
ENSG00000023892	DEF6	8.43503	8.53474	7.96881	8.2934	7.9965	8.44199	8.31355	8.1315	8.50255	8.30025	8.67334	8.41408	8.23146	8.63334	8.47308	8.11811	8.20197	8.15491	8.15029	7.53981	8.12404	8.01012	8.05875	8.14014	8.1131	8.38718	8.09734	8.23759	8.2191	7.90098
ENSG00000023902	PLEKHO1	5.41203	5.26024	5.17749	5.75286	5.11921	5.83768	5.50616	5.57203	5.50049	5.29643	5.2654	6.08844	5.39242	5.80937	5.48661	6.03926	5.38269	5.54477	5.24319	5.42552	5.20689	5.75038	5.61672	5.52404	5.67035	5.53655	5.164	6.13642	5.97966	5.45726
ENSG00000023909	GCLM	9.89149	10.0088	10.1066	10.0439	10.1414	10.1579	9.90274	10.1749	9.88015	10.1696	9.85596	9.95074	10.1605	9.99013	10.0454	9.7579	9.85977	10.1231	9.84441	10.0602	9.92266	9.90487	9.95892	9.83776	9.9998	9.64443	9.723	10.005	9.70911	10.2308
ENSG00000024048	UBR2	10.1677	10.1519	10.2625	10.2357	10.4078	10.2387	10.0941	10.2989	10.3227	10.3372	10.2213	10.2426	10.3749	10.2744	10.2697	10.2163	10.2357	10.0893	10.2029	10.418	10.2915	10.2576	10.2621	10.1351	10.2302	10.1464	10.0209	10.005	10.1381	10.4679
ENSG00000024422	EHD2	2.11311	0	0	0	0	1.38152	0	0	0.876006	0	0	0	1.09692	0	0	0	0	0	0	0	0.74675	0.738771	1.42579	0	0.713771	1.70964	0	0	0	0
ENSG00000024526	DEPDC1	9.58751	9.54377	9.65097	9.65881	9.55475	9.81126	9.3383	9.37428	9.60947	9.32953	9.69069	9.64068	9.6325	9.53683	9.17842	10.2453	10.2341	9.35631	10.157	9.75875	10.3778	10.2353	9.59834	10.285	9.16781	10.0672	9.97652	8.99399	9.84521	9.90213
ENSG00000024862	CCDC28A	7.22736	6.9964	7.44085	7.06384	7.29022	7.51106	7.04377	7.43171	7.26545	7.56235	7.41098	7.29494	7.62967	7.15782	7.67492	7.35357	7.42884	7.41629	7.38831	7.694	7.28784	7.48292	7.42078	7.59248	7.33683	7.08463	7.41077	7.35854	7.24301	7.77765
ENSG00000025039	RRAGD	8.10109	8.08989	8.61599	8.32404	8.34029	8.20355	7.95693	8.31147	7.90624	8.24751	8.05343	8.16113	8.32153	7.9693	8.09678	8.15071	8.25598	8.36504	8.01752	8.57254	8.23208	8.19596	8.39504	8.11167	8.29757	8.08334	8.04258	8.33244	8.07744	8.47785
ENSG00000025156	HSF2	8.6202	8.75846	8.66229	8.84246	8.79264	8.92433	8.6126	8.63972	8.66277	8.77465	8.74417	8.65563	8.83475	8.61189	8.64968	9.00575	8.96832	8.88783	9.02465	8.86005	9.03272	9.0661	8.8341	8.91129	8.6614	8.80603	8.84826	8.47786	8.92921	9.00969
ENSG00000025293	PHF20	11.5357	11.5907	11.653	11.6622	11.6705	11.5484	11.5982	11.6153	11.6227	11.6637	11.6018	11.5617	11.6715	11.6618	11.6239	11.6398	11.5902	11.547	11.6188	11.5859	11.6462	11.6641	11.5981	11.6204	11.5772	11.5799	11.6692	11.622	11.6421	11.5675
ENSG00000025423	HSD17B6	4.07035	4.62951	4.61233	4.26925	4.25428	4.90195	4.71301	4.98205	4.45168	4.26897	4.58263	4.44117	4.57165	4.12154	4.66412	5.24136	4.63637	5.11954	4.63172	4.45871	5.28424	4.5691	4.89105	4.96884	4.76784	5.13183	4.68099	5.01145	5.13901	4.99468
ENSG00000025434	NR1H3	8.74008	8.61184	8.3916	8.63113	8.65271	8.88568	8.73153	8.63007	8.81501	8.61407	8.8078	8.84345	8.43033	8.78285	8.7632	8.62451	8.76449	9.02616	8.76546	8.46759	8.8241	8.78258	8.70303	8.74518	8.66823	8.73605	8.82681	8.72432	8.78302	8.44392
ENSG00000025708	TYMP	7.72939	7.67662	7.36822	6.97835	7.51605	7.70113	7.92875	7.63853	7.61807	7.60167	7.90857	7.97096	7.63794	7.85711	7.68349	6.91135	7.38103	7.92075	7.14327	7.32486	7.13617	7.39966	7.73818	7.09765	7.98045	7.495	7.40354	8.00506	7.55542	7.62638
ENSG00000025770	NCAPH2	9.99739	9.97841	9.87884	9.94455	9.933	9.85443	10.1254	10.0264	9.9754	10.0324	10.1011	10.0586	9.91545	10.2073	10.096	10.163	10.2052	10.118	10.1794	9.66861	10.2203	10.252	10.0023	10.2829	10.1025	10.3978	10.3768	10.2104	10.4355	9.93136
ENSG00000025772	TOMM34	10.686	10.7031	10.46	10.6596	10.4984	10.6308	10.6054	10.5019	10.5844	10.6383	10.5972	10.7439	10.3194	10.7355	10.5589	10.8374	10.8147	10.7689	10.7649	10.5339	10.7406	10.8669	10.5225	10.7778	10.549	10.926	10.974	10.6251	10.9579	10.5665
ENSG00000025796	SEC63	11.2438	11.3069	11.3118	11.301	11.3337	11.3355	11.2158	11.4301	11.4815	11.3891	11.4758	11.4493	11.6715	11.3696	11.3229	11.5214	11.6239	11.5325	11.562	11.545	11.6752	11.6074	11.8135	11.588	11.6517	11.4856	11.4688	11.4644	11.427	11.8824
ENSG00000025800	KPNA6	12.1605	12.2007	12.0527	12.1781	12.0498	12.1473	12.183	12.0671	12.0877	12.1724	12.2013	12.1237	12.1437	12.1927	12.1682	12.2905	12.2192	12.0744	12.2661	12.1318	12.2369	12.1657	12.121	12.2538	12.1464	12.194	12.2508	12.0438	12.2544	12.1427
ENSG00000026025	VIM	8.14837	8.11365	8.28219	7.96708	8.24605	8.12276	8.15841	8.04692	8.08994	8.34728	8.05343	7.94265	8.1814	8.01577	8.27181	7.78591	7.80904	8.51747	7.88586	8.44801	7.71771	7.7392	8.53281	8.02782	8.31797	7.74453	8.06107	8.59546	8.12759	8.36372
ENSG00000026036	RTEL1-TNFRSF6B	5.0631	5.63333	5.17749	5.64602	5.30666	5.83768	5.21099	5.25767	5.38988	4.93521	5.47591	5.13474	5.18222	5.07949	5.40604	4.85489	4.93014	5.23816	5.6713	4.57876	5.09687	4.82878	4.89105	5.1663	4.80134	5.79439	5.72393	5.2523	5.03775	4.46534
ENSG00000026103	FAS	7.3792	7.14214	7.59997	7.56683	7.51605	7.24707	7.39217	7.2291	7.15141	7.43751	7.2485	7.46384	7.4345	7.30407	7.32658	7.27295	7.10017	7.31196	7.37803	7.52494	7.30031	7.26187	7.53014	7.15458	6.99703	7.04384	7.08915	6.89703	7.12453	7.44494
ENSG00000026297	RNASET2	9.04041	9.08724	8.49329	8.91902	9.00048	8.93856	8.87502	9.18607	8.97204	8.84461	8.97304	9.05	8.92879	8.96642	8.89081	8.85959	8.85914	9.13209	8.88643	8.65339	8.87291	8.73808	8.86052	8.81453	8.9994	9.05627	8.99488	9.20209	8.92685	8.66617
ENSG00000026508	CD44	1.80516	1.09158	2.39654	2.75991	3.04152	1.38152	1.76665	1.22072	0.876006	2.8264	2.20959	1.14992	2.14304	2.5078	2.21818	2.26596	0	1.99248	1.13062	3.10975	0	1.87775	2.12869	1.50454	2.27516	1.3299	0	1.97459	0.844953	2.64906
ENSG00000026559	KCNG1	7.32786	7.62795	7.66963	7.37109	7.47753	6.82501	7.50141	7.39796	7.3117	7.54228	7.32661	7.49342	7.67861	7.51287	7.69201	7.09677	7.1294	8.14482	7.19103	8.11724	7.19075	7.17774	7.99342	7.20934	8.37193	7.19309	7.33683	8.31485	7.39406	8.07629
ENSG00000026652	AGPAT4	2.36675	2.4658	2.07006	1.5482	0	2.07411	1.76665	0	1.41715	1.45463	1.14306	1.14992	1.09692	0	0	0	2.7261	0	1.13062	0.966461	1.23635	0	1.42579	0.940111	1.18914	0	0.887572	1.5624	0.844953	1.32564
ENSG00000026751	SLAMF7	1.80516	0	0	0	0	0	0	0	0	0	0	0	0	0	0	1.18264	0	0	0	0	0	0	0.882294	0	0	0.813057	0	0	0	0
ENSG00000026950	BTN3A1	7.52962	7.51652	7.46717	7.77763	7.70295	7.5853	7.72267	7.63853	7.46279	7.81745	7.59357	7.51281	7.46272	7.43684	7.6224	7.5811	7.65674	7.50572	7.40865	7.60489	7.42507	7.4167	7.76639	7.57173	7.83435	7.58874	7.56768	7.77995	7.35249	8.01038
ENSG00000027001	MIPEP	10.1135	10.0904	10.108	10.0386	10.0426	10.0419	10.0861	10.0501	9.97779	10.0749	10.0963	10.104	10.0717	10.1667	10.0718	10.1274	10.2154	9.96296	9.94708	10.0249	10.0462	10.1109	9.81507	10.0363	9.72546	10.0904	10.0979	9.88193	10.0904	9.93581
ENSG00000027075	PRKCH	8.69448	8.90182	9.09531	8.76799	8.76091	8.78426	8.79923	9.16616	8.7239	8.94993	8.94501	8.91442	8.89467	8.65866	8.69277	9.0548	8.91056	8.65533	8.72142	8.96292	8.86244	8.93819	8.99536	8.83499	9.04207	8.95429	8.8023	9.0902	8.81398	8.9669
ENSG00000027644	INSRR	2.11311	0	0	0	0	0	0	1.22072	0.876006	0	0	0	0	0	0	0	0	0	0	0	0	0.738771	0	0	0	0	0	0	0	0
ENSG00000027697	IFNGR1	8.90181	9.03221	9.28728	8.94178	9.0636	9.13261	8.83003	9.10472	8.99348	9.20527	9.01745	8.89977	9.31928	8.82819	9.03509	8.94756	9.09226	9.15489	8.98117	9.30074	9.13195	9.05344	9.11648	8.99939	8.99398	9.00406	8.95095	8.8909	9.02051	9.30596
ENSG00000027847	B4GALT7	9.3853	9.28853	9.18262	9.18538	9.17612	9.33265	9.3622	9.18607	9.38816	9.09477	9.25284	9.32962	9.2153	9.20281	9.29766	9.08548	9.22344	9.46572	9.20121	9.13926	9.14583	9.2845	9.14469	9.32075	9.28938	9.3301	9.45769	9.39443	9.26041	9.13868
ENSG00000027869	SH2D2A	2.36675	1.09158	1.04708	0	1.77027	2.54009	0	0	1.41715	1.85252	1.14306	1.14992	1.71279	1.11894	0	0	0	2.57661	1.13062	1.54007	1.89221	0	2.12869	2.70311	2.61369	1.70964	1.43302	0	2.53038	0.81001
ENSG00000028116	VRK2	8.6202	8.7395	8.77193	8.65544	8.72848	8.5694	8.76777	8.58579	8.50918	8.66136	8.5853	8.63365	8.79831	8.63334	8.6453	8.57733	8.92313	8.61935	8.96065	8.92944	8.83913	8.82148	8.82071	8.79675	8.54755	8.63803	8.688	8.55856	8.69429	8.95162
ENSG00000028137	TNFRSF1B	2.36675	1.09158	1.04708	0.972514	0	0	2.20287	1.22072	0.876006	1.85252	0	2.21942	0	3.00563	0	2.60399	1.92915	2.31391	2.52559	0.966461	1.60123	2.11895	0	0	2.07054	2.25841	1.43302	1.5624	1.3743	1.32564
ENSG00000028203	VEZT	11.4551	11.4421	11.6743	11.4607	11.5591	11.5507	11.4332	11.6067	11.4049	11.5825	11.4216	11.4785	11.643	11.3516	11.4639	11.4174	11.4422	11.4637	11.4833	11.6248	11.3551	11.4713	11.5985	11.3392	11.5132	11.339	11.4513	11.3701	11.4706	11.6431
ENSG00000028277	POU2F2	3.08475	1.09158	3.78619	1.5482	2.54161	2.89174	1.76665	2.31958	2.77547	1.85252	2.20959	2.82682	2.14304	1.74147	2.55354	0	1.92915	3.16101	2.52559	1.54007	2.68349	2.32554	1.42579	1.90921	2.88769	2.96576	2.13758	1.5624	1.7607	2.25281
ENSG00000028310	BRD9	10.0287	10.0556	9.78431	9.89438	9.84307	10.004	9.98028	10.1362	10.3699	9.69334	10.2502	10.244	10.203	10.2356	9.89114	9.95166	9.72503	9.96869	10.0397	9.60464	10.0444	10.0421	10.0706	10.0725	9.99438	10.0353	10.0821	10.0308	9.93126	9.65499
ENSG00000028528	SNX1	11.6573	11.6992	11.7987	11.7222	11.7695	11.6692	11.7448	11.7903	11.7001	11.7628	11.7051	11.7456	11.6619	11.7732	11.7794	11.4822	11.4753	11.7213	11.5896	11.6702	11.511	11.4528	11.5636	11.479	11.7342	11.5474	11.5293	11.6721	11.5665	11.6873
ENSG00000028839	TBPL1	8.93895	9.09622	9.14235	9.26425	9.06685	9.34694	9.04542	9.13235	9.12015	8.98257	9.12128	9.12751	9.29855	8.82073	8.77928	9.39672	9.42844	9.31866	9.49318	9.34797	9.50745	9.4426	9.14254	9.37964	8.87511	9.28354	9.30708	9.03486	9.15151	9.35656
ENSG00000029153	ARNTL2	8.84816	8.64483	8.99033	8.91327	8.89483	9.00318	8.7757	8.75529	8.62053	8.72803	8.85751	8.80465	8.813	8.69175	8.7632	9.27779	9.31852	8.84174	9.17473	9.14413	9.33643	9.27985	8.95425	9.20426	8.76055	9.07866	9.09919	8.71093	9.06837	9.16542
ENSG00000029363	BCLAF1	12.9648	13.0257	13.1338	13.0772	13.0779	13.1177	12.9145	13.0249	13.0123	13.1242	13.0214	13.0326	13.1865	12.9932	13.0095	13.1518	13.1994	12.8871	13.1746	13.0718	13.1311	13.2153	13.0929	13.1031	12.9308	13.1089	13.1376	12.8221	13.1544	13.1491
ENSG00000029364	SLC39A9	12.4101	12.4541	12.4745	12.4834	12.4782	12.4825	12.346	12.3918	12.3729	12.4687	12.4324	12.422	12.4527	12.3561	12.4357	12.4515	12.535	12.4339	12.5165	12.6793	12.5254	12.4455	12.4485	12.4917	12.5016	12.3652	12.36	12.2894	12.4495	12.7251
ENSG00000029534	ANK1	4.49956	4.25529	3.99357	4.11756	3.23866	4.22185	4.15529	4.38952	4.83615	4.50848	4.65361	4.35786	4.34785	4.38694	4.51843	4.02138	3.43684	4.38276	3.39454	4.10591	4.21942	4.48543	4.71694	4.40673	3.71827	4.2605	3.94963	4.49107	4.81101	3.43188
ENSG00000029559	IBSP	0	0	1.04708	0	0	0	0	0	1.41715	0	0	0	0	0	0	0	0	0	0	0	0	0	0	0	0	0.813057	0	0	0	0
ENSG00000029639	TFB1M	7.84868	8.23777	8.08667	8.02685	8.15745	8.07202	8.01838	8.06137	7.89109	8.28422	8.04024	7.89911	8.14703	7.92824	7.93391	8.29769	8.23597	8.00682	8.15632	8.17076	8.08494	8.14915	8.03111	7.99703	8.02012	8.12696	8.12396	8.01599	8.06891	8.24338
ENSG00000029725	RABEP1	11.6651	11.7037	11.7549	11.797	11.6812	11.6974	11.6723	11.6834	11.7302	11.7291	11.7428	11.787	11.8446	11.8024	11.7098	11.8087	11.8553	11.7179	11.8006	11.5325	11.8382	11.8791	11.802	11.7763	11.6068	11.914	11.8885	11.6477	11.8676	11.7043
ENSG00000029993	HMGB3	10.0161	9.95394	9.80509	9.93323	9.79689	9.92284	9.85488	9.78443	9.96458	9.6903	9.82554	10.0235	9.81322	10.0165	9.83454	10.0326	10.0457	9.8386	9.99495	9.76351	9.9634	10.0809	9.7144	10.0186	9.84875	10.1722	10.1101	9.89826	10.1901	9.8095
ENSG00000030066	NUP160	11.7539	11.7873	11.762	11.8037	11.6865	11.8725	11.6976	11.7157	11.6737	11.6752	11.7735	11.7497	11.688	11.7829	11.6903	11.9844	11.9668	11.5917	11.9121	11.4815	11.9736	11.9376	11.6794	11.8431	11.3817	11.9262	11.8677	11.5622	11.9245	11.5396
ENSG00000030110	BAK1	9.51722	9.36229	9.06116	9.18776	9.19998	9.43658	9.36483	9.01481	9.2584	9.28392	9.20046	9.34052	9.07001	9.30257	9.25804	9.25098	9.30577	9.40572	9.32945	9.11712	9.21823	9.38605	9.11867	9.34133	9.08521	9.33687	9.2915	9.39023	9.37036	9.07965
ENSG00000030304	MUSK	0.873071	0	0	0	1.14117	0	0	0	0	0	0	0	0	0	0	0	0	0	1.13062	0	0	0	0	0	0.713771	0	0	0	0	0
ENSG00000030419	IKZF2	6.35158	5.98206	6.66158	6.23062	6.70986	6.34467	5.84453	6.78282	6.49786	6.62189	6.24652	6.4113	6.92756	6.13218	6.92542	6.27043	6.34051	6.52923	6.33447	6.85156	6.25283	6.04153	6.98473	6.40258	6.64693	6.07916	6.27623	6.28837	5.82615	6.56071
ENSG00000030582	GRN	10.6484	10.6694	10.6888	10.5398	10.6479	10.545	10.7613	10.7472	10.5325	10.7914	10.5549	10.5674	10.5648	10.6497	10.7678	10.2884	10.4185	10.6401	10.3897	10.6804	10.1728	10.2615	10.4513	10.3071	10.7607	10.4179	10.3869	10.6393	10.5286	10.4786
ENSG00000031003	FAM13B	11.002	11.0081	11.1073	11.1325	11.0762	11.0856	11.0335	11.0183	11.0914	11.0725	11.0154	10.9756	11.128	11.0068	10.9188	11.0733	11.1078	10.997	11.2074	11.3405	11.1679	11.1362	11.1873	11.1421	11.0435	10.981	11.0154	10.9667	11.0615	11.399
[truncated: 15,894 more rows]
