# Supplementary material for: Rational optimization of a transcription factor activation domain inhibitor
Source: Nat Struct Mol Biol. 2023 Dec 4;30(12):1958–69. doi: 10.1038/s41594-023-01159-5 (PMC10716049; doi:10.1038/s41594-023-01159-5)
Supplement: Supplementary file 11 — Gene level RNA-Seq data analysis, GSEA datasets, AR up genes in PC3 AR-V7 and source data used to produce Extended Data Fig. 3j–l. [file 41594_2023_1159_MOESM11_ESM.xlsx]

## Sheet: Contents
Supplementary Table SXX
Tabs
1	Gene level RNAseq data analysis AR V7 vs control.
2	Gene level RNAseq data analysis AR V7 22YtoS vs control.
3	Gene level RNAseq data analysis AR V7 22YtoF vs control.
4	Gene level RNAseq data analysis AR V7 22YtoS vs AR V7.
5	Gene level RNAseq data analysis AR V7 22YtoF vs AR V7.
6	Gene level RNAseq data analysis AR V7 22YtoS vs AR V7 22YtoS.
7	GSEA datasets used and AR up genes in PC3 AR V7.
8	Source data for S3J.
9	Source data for S3K.
10	Source data for S3L.

## Sheet: 1. AR V7_vs_Control
ID	Gene_Symbol	Type	baseMean	log2FoldChange	lfcSE	stat	pvalue	padj
ENSG00000081803.15	CADPS2	protein_coding	8048.08	-1.17792	0.0443208	-26.577	1.25162e-155	2.13352e-151
ENSG00000130600.18	H19	processed_transcript	8574.6	1.16768	0.0457546	25.5206	1.16572e-143	9.93547e-140
ENSG00000131746.12	TNS4	protein_coding	754.763	-3.33062	0.13791	-24.1507	7.33871e-129	4.16985e-125
ENSG00000205426.10	KRT81	protein_coding	28145.1	-0.77077	0.0385533	-19.9923	6.4241e-89	2.73763e-85
ENSG00000096060.14	FKBP5	protein_coding	3065.7	1.12322	0.0644891	17.4173	6.10294e-68	2.08061e-64
ENSG00000135480.15	KRT7	protein_coding	6966.66	-0.80784	0.0470264	-17.1784	3.85245e-66	1.09448e-62
ENSG00000170477.12	KRT4	protein_coding	8529.74	0.746738	0.0436926	17.0907	1.74057e-65	4.18093e-62
ENSG00000168672.3	FAM84B	protein_coding	840.27	-1.90335	0.111413	-17.0837	1.96219e-65	4.18093e-62
ENSG00000167244.19	IGF2	protein_coding	104592	0.547729	0.0321957	17.0125	6.63769e-65	1.25718e-61
ENSG00000104413.16	ESRP1	protein_coding	264.999	-5.06506	0.311925	-16.2381	2.71257e-59	4.62384e-56
ENSG00000091986.15	CCDC80	protein_coding	567.832	2.16554	0.137156	15.7889	3.70781e-56	5.74575e-53
ENSG00000119888.10	EPCAM	protein_coding	441.535	-2.35242	0.156679	-15.0142	5.92524e-51	8.4168e-48
ENSG00000168542.14	COL3A1	protein_coding	2181.19	1.0478	0.0703076	14.903	3.14985e-50	4.13018e-47
ENSG00000108551.4	RASD1	protein_coding	422.196	2.40867	0.165883	14.5203	9.01245e-48	1.09733e-44
ENSG00000250722.5	SEPP1	protein_coding	260.345	3.19006	0.223032	14.3031	2.09145e-46	2.37672e-43
ENSG00000149418.10	ST14	protein_coding	249.684	-3.37045	0.238227	-14.1481	1.91926e-45	2.04473e-42
ENSG00000041982.15	TNC	protein_coding	2836.16	-0.862564	0.0626427	-13.7696	3.88514e-43	3.89565e-40
ENSG00000159166.13	LAD1	protein_coding	217.992	-3.36598	0.251196	-13.3998	6.06135e-41	5.7401e-38
ENSG00000113083.13	LOX	protein_coding	791.233	1.52275	0.114837	13.2601	3.94341e-40	3.53786e-37
ENSG00000005884.17	ITGA3	protein_coding	25915.4	-0.464369	0.0351933	-13.1948	9.39738e-40	8.00939e-37
ENSG00000189221.9	MAOA	protein_coding	243.633	2.94866	0.224273	13.1476	1.7555e-39	1.42497e-36
ENSG00000167772.11	ANGPTL4	protein_coding	707.274	1.56133	0.119835	13.029	8.37013e-39	6.48533e-36
ENSG00000118523.5	CTGF	protein_coding	2288.55	0.90822	0.069892	12.9946	1.31271e-38	9.72892e-36
ENSG00000082397.17	EPB41L3	protein_coding	1835.71	-1.00169	0.0784011	-12.7765	2.21924e-37	1.57621e-34
ENSG00000138061.11	CYP1B1	protein_coding	3482.47	-0.735867	0.0581966	-12.6445	1.19989e-36	8.18133e-34
ENSG00000081277.12	PKP1	protein_coding	9638.77	-0.532212	0.0425861	-12.4973	7.72217e-36	5.06277e-33
ENSG00000111319.12	SCNN1A	protein_coding	425.66	1.97481	0.159139	12.4094	2.32475e-35	1.46769e-32
ENSG00000131620.17	ANO1	protein_coding	2241.73	-0.848893	0.0687396	-12.3494	4.90795e-35	2.98789e-32
ENSG00000156113.22	KCNMA1	protein_coding	3784.57	-0.717565	0.0581428	-12.3414	5.41834e-35	3.18486e-32
ENSG00000166145.14	SPINT1	protein_coding	805.553	-1.39147	0.112928	-12.3217	6.92135e-35	3.93271e-32
ENSG00000160691.18	SHC1	protein_coding	8326.01	0.533096	0.0436905	12.2017	3.04565e-34	1.67471e-31
ENSG00000115339.13	GALNT3	protein_coding	670.676	-1.47428	0.120959	-12.1882	3.5911e-34	1.91294e-31
ENSG00000189056.13	RELN	protein_coding	2026.18	-0.899248	0.0744324	-12.0814	1.3245e-33	6.84164e-31
ENSG00000124107.5	SLPI	protein_coding	4583.48	0.649291	0.054066	12.0092	3.17789e-33	1.59325e-30
ENSG00000122861.15	PLAU	protein_coding	33654.6	-0.393358	0.0330659	-11.8962	1.23918e-32	6.03517e-30
ENSG00000125538.11	IL1B	protein_coding	677.952	-1.46612	0.125835	-11.6511	2.26514e-31	1.07255e-28
ENSG00000196542.8	SPTSSB	protein_coding	774.974	-1.32135	0.113474	-11.6445	2.44836e-31	1.12797e-28
ENSG00000104327.7	CALB1	protein_coding	918.215	-1.20024	0.103395	-11.6083	3.73927e-31	1.67736e-28
ENSG00000106236.3	NPTX2	protein_coding	134.088	4.46604	0.385339	11.5899	4.63652e-31	2.02651e-28
ENSG00000163430.11	FSTL1	protein_coding	9411.96	-0.501211	0.0435232	-11.5159	1.09652e-30	4.6728e-28
ENSG00000114251.14	WNT5A	protein_coding	508.232	-1.68008	0.146517	-11.4668	1.93736e-30	8.05471e-28
ENSG00000152078.9	TMEM56	protein_coding	969.84	1.18287	0.103688	11.408	3.8121e-30	1.54717e-27
ENSG00000163359.15	COL6A3	protein_coding	7903.27	-0.542116	0.0475931	-11.3907	4.6547e-30	1.84521e-27
ENSG00000138131.3	LOXL4	protein_coding	23692	0.403147	0.0356994	11.2928	1.42409e-29	5.51706e-27
ENSG00000107984.9	DKK1	protein_coding	56109.6	0.344944	0.0305688	11.2842	1.5713e-29	5.95207e-27
ENSG00000232774.7	RP11-47I22.3	lincRNA	2171.48	0.790526	0.0708996	11.1499	7.16577e-29	2.65538e-26
ENSG00000135535.16	CD164	protein_coding	22354.3	0.38361	0.0349447	10.9776	4.89628e-28	1.77579e-25
ENSG00000102760.12	RGCC	protein_coding	129.598	3.6095	0.334539	10.7895	3.8601e-27	1.37082e-24
ENSG00000123983.13	ACSL3	protein_coding	13461.1	0.435492	0.0404951	10.7542	5.66269e-27	1.96992e-24
ENSG00000168906.12	MAT2A	protein_coding	26141.1	0.419611	0.039069	10.7403	6.58596e-27	2.24529e-24
ENSG00000076716.8	GPC4	protein_coding	288.154	-2.01388	0.187676	-10.7306	7.31307e-27	2.44429e-24
ENSG00000149948.13	HMGA2	protein_coding	6256.07	0.55692	0.0523365	10.6411	1.91777e-26	6.2866e-24
ENSG00000166741.7	NNMT	protein_coding	2507.25	0.741995	0.070018	10.5972	3.06988e-26	9.87342e-24
ENSG00000106541.11	AGR2	protein_coding	10405.5	0.45014	0.0437544	10.2879	7.99226e-25	2.52084e-22
ENSG00000189334.8	S100A14	protein_coding	111.652	-3.96875	0.385833	-10.2862	8.13364e-25	2.52084e-22
ENSG00000105810.9	CDK6	protein_coding	1274.23	-0.934229	0.0911217	-10.2525	1.15273e-24	3.50883e-22
ENSG00000134755.14	DSC2	protein_coding	448.029	-1.52767	0.149249	-10.2358	1.37123e-24	4.1007e-22
ENSG00000139219.18	COL2A1	protein_coding	749.984	1.15894	0.113546	10.2068	1.84876e-24	5.43345e-22
ENSG00000169429.10	CXCL8	protein_coding	1262.06	-0.986509	0.0972032	-10.1489	3.34997e-24	9.67857e-22
ENSG00000163814.7	CDCP1	protein_coding	20172.4	-0.346886	0.0345552	-10.0386	1.03118e-23	2.92958e-21
ENSG00000137801.10	THBS1	protein_coding	10209.4	0.412286	0.0415582	9.92069	3.3842e-23	9.45691e-21
ENSG00000132182.11	NUP210	protein_coding	6468.86	-0.498515	0.0502928	-9.91225	3.6826e-23	1.01248e-20
ENSG00000134827.7	TCN1	protein_coding	1906.02	0.737354	0.0751416	9.81286	9.91231e-23	2.68199e-20
ENSG00000132688.10	NES	protein_coding	5332.05	-0.486298	0.0496154	-9.80135	1.1109e-22	2.95881e-20
ENSG00000117114.19	ADGRL2	protein_coding	169.461	-2.5298	0.259972	-9.73104	2.22303e-22	5.82981e-20
ENSG00000144583.4	MARCH4	protein_coding	117.203	-3.32832	0.34309	-9.70101	2.98525e-22	7.7101e-20
ENSG00000139926.15	FRMD6	protein_coding	3016.32	-0.607417	0.0634054	-9.57989	9.71495e-22	2.47166e-19
ENSG00000173175.14	ADCY5	protein_coding	469.866	-1.39943	0.146108	-9.57803	9.89091e-22	2.47942e-19
ENSG00000196352.15	CD55	protein_coding	17435	0.352614	0.0368317	9.57365	1.03195e-21	2.54938e-19
ENSG00000147394.18	ZNF185	protein_coding	2611.42	-0.643737	0.0673257	-9.56153	1.16023e-21	2.82533e-19
ENSG00000130066.16	SAT1	protein_coding	2096.7	0.730084	0.0765657	9.5354	1.4931e-21	3.5847e-19
ENSG00000111799.20	COL12A1	protein_coding	2490.42	-0.621346	0.0656111	-9.47014	2.79463e-21	6.61629e-19
ENSG00000123095.5	BHLHE41	protein_coding	1247.35	-0.890917	0.0947341	-9.4044	5.23285e-21	1.22191e-18
ENSG00000205670.10	SMIM11A	protein_coding	331.426	-1.59822	0.172412	-9.26975	1.86574e-20	4.29777e-18
ENSG00000214510.9	SPINK13	protein_coding	88.869	5.43099	0.588624	9.22658	2.79414e-20	6.35052e-18
ENSG00000143878.9	RHOB	protein_coding	1190.12	0.834375	0.090821	9.18703	4.03851e-20	9.05796e-18
ENSG00000038427.15	VCAN	protein_coding	133.396	-2.71565	0.297071	-9.14144	6.16243e-20	1.36422e-17
ENSG00000154764.5	WNT7A	protein_coding	256.66	-1.85723	0.203498	-9.12649	7.07541e-20	1.54625e-17
ENSG00000135074.15	ADAM19	protein_coding	2727.6	-0.569656	0.063324	-8.99589	2.34331e-19	5.05621e-17
ENSG00000117983.17	MUC5B	protein_coding	11922.1	0.386004	0.0430035	8.9761	2.80523e-19	5.97724e-17
ENSG00000029153.14	ARNTL2	protein_coding	4518.56	-0.480834	0.0539676	-8.90967	5.11831e-19	1.07712e-16
ENSG00000140479.16	PCSK6	protein_coding	566.211	1.18889	0.13424	8.85643	8.26165e-19	1.71742e-16
ENSG00000162494.5	LRRC38	protein_coding	123.647	-2.69368	0.305812	-8.80831	1.27044e-18	2.60915e-16
ENSG00000128342.4	LIF	protein_coding	4144.23	-0.475463	0.0542549	-8.76352	1.89254e-18	3.84051e-16
ENSG00000154678.16	PDE1C	protein_coding	532.179	-1.17235	0.134028	-8.74704	2.19016e-18	4.39216e-16
ENSG00000183696.13	UPP1	protein_coding	1295.52	0.800284	0.0928327	8.62071	6.65413e-18	1.31891e-15
ENSG00000154639.18	CXADR	protein_coding	1105.38	0.820269	0.095605	8.57977	9.50601e-18	1.86252e-15
ENSG00000276168.1	RN7SL1	misc_RNA	3799.45	0.566843	0.0667215	8.49567	1.96802e-17	3.81215e-15
ENSG00000205420.10	KRT6A	protein_coding	75.7754	3.88813	0.458636	8.4776	2.29894e-17	4.40312e-15
ENSG00000134762.16	DSC3	protein_coding	778.95	-0.968847	0.114399	-8.46901	2.47486e-17	4.68739e-15
ENSG00000110031.12	LPXN	protein_coding	1030.97	-0.863564	0.102251	-8.44554	3.02631e-17	5.66885e-15
ENSG00000078269.14	SYNJ2	protein_coding	4611.76	-0.438666	0.0521449	-8.41245	4.01547e-17	7.43997e-15
ENSG00000105699.16	LSR	protein_coding	457.694	-1.25213	0.149236	-8.39028	4.84966e-17	8.88895e-15
ENSG00000135905.19	DOCK10	protein_coding	337.393	-1.43205	0.170777	-8.38548	5.05196e-17	9.16124e-15
ENSG00000123416.15	TUBA1B	protein_coding	72777.1	-0.249219	0.0298106	-8.3601	6.26629e-17	1.12437e-14
ENSG00000108848.15	LUC7L3	protein_coding	9357.75	0.432877	0.0520227	8.32091	8.72898e-17	1.53396e-14
ENSG00000132470.13	ITGB4	protein_coding	19817.7	-0.325538	0.0391188	-8.32178	8.66555e-17	1.53396e-14
ENSG00000197956.9	S100A6	protein_coding	28809.4	0.329609	0.0396515	8.31266	9.35838e-17	1.62779e-14
ENSG00000124102.4	PI3	protein_coding	5797.17	0.440067	0.0530131	8.3011	1.03152e-16	1.77609e-14
ENSG00000076641.4	PAG1	protein_coding	1178.02	0.750635	0.0923862	8.12497	4.47469e-16	7.57944e-14
ENSG00000164904.17	ALDH7A1	protein_coding	9133.16	0.361911	0.0445455	8.12453	4.49093e-16	7.57944e-14
ENSG00000166396.12	SERPINB7	protein_coding	905.193	-0.837824	0.103278	-8.1123	4.96695e-16	8.30065e-14
ENSG00000136153.19	LMO7	protein_coding	8284.7	-0.364207	0.0449425	-8.10384	5.3249e-16	8.81245e-14
ENSG00000196586.13	MYO6	protein_coding	358.538	-1.31508	0.162374	-8.09908	5.5377e-16	9.0765e-14
ENSG00000173801.16	JUP	protein_coding	1790.08	-0.613168	0.0758541	-8.08351	6.29263e-16	1.02156e-13
ENSG00000122641.10	INHBA	protein_coding	4470.46	-0.47842	0.0593944	-8.05497	7.94989e-16	1.27843e-13
ENSG00000169908.11	TM4SF1	protein_coding	6624.99	-0.389925	0.0486627	-8.01282	1.12112e-15	1.78603e-13
ENSG00000147676.13	MAL2	protein_coding	51790	0.269201	0.0338622	7.94988	1.86699e-15	2.94673e-13
ENSG00000170442.11	KRT86	protein_coding	1396.8	-0.7536	0.0949506	-7.93676	2.07533e-15	3.24551e-13
ENSG00000116741.7	RGS2	protein_coding	6471.36	0.433541	0.0551458	7.86173	3.78858e-15	5.87093e-13
ENSG00000198105.13	ZNF248	protein_coding	9102.09	0.381101	0.0486185	7.83859	4.55623e-15	6.99689e-13
ENSG00000132561.13	MATN2	protein_coding	571.818	-1.00925	0.129101	-7.81753	5.38693e-15	8.19871e-13
ENSG00000076706.16	MCAM	protein_coding	2910.78	-0.489283	0.0626498	-7.80981	5.72746e-15	8.63984e-13
ENSG00000125148.6	MT2A	protein_coding	3975.28	0.424598	0.0545691	7.78092	7.19968e-15	1.07654e-12
ENSG00000096696.13	DSP	protein_coding	1865.92	-0.592826	0.076554	-7.74389	9.64179e-15	1.42917e-12
ENSG00000101280.7	ANGPT4	protein_coding	735.181	0.954135	0.123268	7.74035	9.91461e-15	1.44798e-12
ENSG00000147162.13	OGT	protein_coding	14710.5	0.365375	0.0472058	7.74004	9.93861e-15	1.44798e-12
ENSG00000166888.11	STAT6	protein_coding	1370.34	-0.674436	0.0872719	-7.72798	1.09264e-14	1.5784e-12
ENSG00000163993.6	S100P	protein_coding	558.116	1.02145	0.133148	7.67153	1.69953e-14	2.43447e-12
ENSG00000026508.18	CD44	protein_coding	29221.5	-0.302377	0.0396789	-7.62061	2.52486e-14	3.58657e-12
ENSG00000138772.12	ANXA3	protein_coding	2159.07	-0.532512	0.0699184	-7.6162	2.6126e-14	3.68053e-12
ENSG00000133401.15	PDZD2	protein_coding	2192.22	0.542452	0.0713357	7.60421	2.86642e-14	4.005e-12
ENSG00000255717.6	SNHG1	processed_transcript	5516.31	0.447549	0.0589672	7.58979	3.20414e-14	4.44047e-12
ENSG00000117595.11	IRF6	protein_coding	65.4806	-3.4615	0.457109	-7.5726	3.65839e-14	5.0291e-12
ENSG00000198732.10	SMOC1	protein_coding	91.9414	2.8002	0.37144	7.53876	4.74477e-14	6.47035e-12
ENSG00000146904.8	EPHA1	protein_coding	90.4643	-2.78825	0.370971	-7.51608	5.64436e-14	7.63601e-12
ENSG00000102024.17	PLS3	protein_coding	16871.1	-0.271135	0.0361118	-7.50821	5.994e-14	8.04518e-12
ENSG00000163535.17	SGO2	protein_coding	5690.45	0.395349	0.0531053	7.44461	9.72299e-14	1.29483e-11
ENSG00000039068.18	CDH1	protein_coding	410	-1.19837	0.161252	-7.43165	1.07253e-13	1.41723e-11
ENSG00000148677.6	ANKRD1	protein_coding	485.253	1.07785	0.14562	7.40178	1.34368e-13	1.76187e-11
ENSG00000162878.12	PKDCC	protein_coding	3028.77	0.455648	0.0619466	7.35551	1.90204e-13	2.47497e-11
ENSG00000136167.13	LCP1	protein_coding	502.732	-1.02814	0.14073	-7.30578	2.75673e-13	3.55994e-11
ENSG00000115363.13	EVA1A	protein_coding	543.987	-0.989465	0.135483	-7.30324	2.80926e-13	3.6005e-11
ENSG00000186832.8	KRT16	protein_coding	145.958	1.93448	0.265487	7.28653	3.18041e-13	4.04577e-11
ENSG00000094975.13	SUCO	protein_coding	10563.8	0.299898	0.0413119	7.25935	3.88956e-13	4.91122e-11
ENSG00000156966.6	B3GNT7	protein_coding	2666.05	0.461747	0.063704	7.24833	4.21947e-13	5.28861e-11
ENSG00000163659.12	TIPARP	protein_coding	3696.89	0.420202	0.0585489	7.17694	7.12896e-13	8.87009e-11
ENSG00000196878.14	LAMB3	protein_coding	6783.66	-0.333978	0.0465451	-7.17537	7.21128e-13	8.9075e-11
ENSG00000132821.11	VSTM2L	protein_coding	4210.35	0.428033	0.0599549	7.13924	9.3846e-13	1.15086e-10
ENSG00000167601.11	AXL	protein_coding	12272.5	-0.278099	0.0390291	-7.12542	1.03763e-12	1.26339e-10
ENSG00000259974.2	LINC00261	lincRNA	5586.42	0.383384	0.0539481	7.10654	1.18988e-12	1.43849e-10
ENSG00000104368.17	PLAT	protein_coding	138076	0.205786	0.0289787	7.10127	1.23613e-12	1.48388e-10
ENSG00000119707.13	RBM25	protein_coding	22056.9	0.304026	0.0431557	7.04486	1.85653e-12	2.21304e-10
ENSG00000100650.15	SRSF5	protein_coding	14574.2	0.317391	0.0451627	7.02773	2.09915e-12	2.48487e-10
ENSG00000196498.13	NCOR2	protein_coding	16406.5	-0.265408	0.0378347	-7.01494	2.30044e-12	2.70436e-10
ENSG00000135821.18	GLUL	protein_coding	12609.3	0.268665	0.0383644	7.00299	2.50565e-12	2.92543e-10
ENSG00000108691.9	CCL2	protein_coding	570.894	-0.915428	0.130859	-6.99551	2.643e-12	3.06481e-10
ENSG00000099260.10	PALMD	protein_coding	166.583	-1.70454	0.24445	-6.97296	3.10338e-12	3.57434e-10
ENSG00000133019.11	CHRM3	protein_coding	2133.95	-0.504474	0.0724522	-6.96286	3.3343e-12	3.81453e-10
ENSG00000104419.14	NDRG1	protein_coding	9888.51	0.281722	0.0404875	6.95825	3.44521e-12	3.91513e-10
ENSG00000084234.16	APLP2	protein_coding	52422.2	0.218167	0.0313656	6.95561	3.51033e-12	3.96272e-10
ENSG00000158769.17	F11R	protein_coding	1465.24	-0.583798	0.0843942	-6.91752	4.59626e-12	5.15447e-10
ENSG00000139629.15	GALNT6	protein_coding	2799.9	-0.432916	0.0626695	-6.90793	4.9178e-12	5.479e-10
ENSG00000133424.20	LARGE	protein_coding	272.877	1.29546	0.188015	6.89017	5.5727e-12	6.16832e-10
ENSG00000086205.17	FOLH1	protein_coding	452.361	-1.04828	0.152211	-6.88701	5.69766e-12	6.26596e-10
ENSG00000186081.11	KRT5	protein_coding	81.7399	7.33047	1.06727	6.86844	6.49063e-12	7.09226e-10
ENSG00000148344.10	PTGES	protein_coding	2880.63	0.42591	0.0620572	6.86318	6.73445e-12	7.26553e-10
ENSG00000153993.13	SEMA3D	protein_coding	3577.57	0.398659	0.0580833	6.86357	6.71625e-12	7.26553e-10
ENSG00000168209.4	DDIT4	protein_coding	3658.71	0.40412	0.0589693	6.85306	7.22865e-12	7.74966e-10
ENSG00000106078.17	COBL	protein_coding	84.4511	-2.44108	0.356472	-6.84789	7.4945e-12	7.98445e-10
ENSG00000145730.20	PAM	protein_coding	21325.4	0.244315	0.0357023	6.84311	7.74898e-12	8.20429e-10
ENSG00000161011.19	SQSTM1	protein_coding	15339.4	-0.253369	0.0370309	-6.84209	7.80434e-12	8.2119e-10
ENSG00000162105.18	SHANK2	protein_coding	71.4472	-2.72288	0.399852	-6.80973	9.77838e-12	1.02259e-09
ENSG00000105835.11	NAMPT	protein_coding	13006.1	0.292329	0.0431617	6.77289	1.26238e-11	1.31211e-09
ENSG00000117020.16	AKT3	protein_coding	1153.35	-0.635877	0.0939375	-6.76915	1.2954e-11	1.33826e-09
ENSG00000102265.11	TIMP1	protein_coding	11070.8	0.316487	0.0467625	6.76795	1.30616e-11	1.34125e-09
ENSG00000131171.12	SH3BGRL	protein_coding	4060.73	0.389861	0.0577648	6.74912	1.48748e-11	1.51829e-09
ENSG00000115641.18	FHL2	protein_coding	1527.55	-0.549363	0.0814275	-6.74665	1.51296e-11	1.53512e-09
ENSG00000164120.13	HPGD	protein_coding	886.954	-0.69646	0.103348	-6.73899	1.59495e-11	1.60872e-09
ENSG00000050405.13	LIMA1	protein_coding	2482.04	-0.466972	0.0694072	-6.728	1.72016e-11	1.71473e-09
ENSG00000160255.17	ITGB2	protein_coding	589.467	-0.879572	0.130717	-6.7288	1.71066e-11	1.71473e-09
ENSG00000134193.14	REG4	protein_coding	1531.7	0.541574	0.0808633	6.69741	2.12152e-11	2.10252e-09
ENSG00000070610.14	GBA2	protein_coding	5976.89	0.319632	0.0478809	6.67556	2.46294e-11	2.42678e-09
ENSG00000170323.8	FABP4	protein_coding	2513.65	0.525563	0.0788064	6.66904	2.57487e-11	2.52249e-09
ENSG00000162631.18	NTNG1	protein_coding	818.814	-0.722101	0.108575	-6.65069	2.91727e-11	2.84159e-09
ENSG00000059804.15	SLC2A3	protein_coding	43.3675	4.79109	0.721185	6.64337	3.06595e-11	2.96945e-09
ENSG00000133710.15	SPINK5	protein_coding	418.311	1.00159	0.150808	6.64149	3.10525e-11	2.99051e-09
ENSG00000105974.11	CAV1	protein_coding	15223.4	-0.250893	0.0378215	-6.6336	3.27599e-11	3.13722e-09
ENSG00000092445.11	TYRO3	protein_coding	2841.53	0.409375	0.0618736	6.61632	3.68262e-11	3.50692e-09
ENSG00000184292.6	TACSTD2	protein_coding	125.615	-1.90009	0.287798	-6.60216	4.05205e-11	3.83729e-09
ENSG00000174804.3	FZD4	protein_coding	6938.46	0.314384	0.0476731	6.59458	4.26465e-11	4.01631e-09
ENSG00000099194.5	SCD	protein_coding	39709.7	0.257188	0.0395145	6.5087	7.58026e-11	7.09962e-09
ENSG00000110080.18	ST3GAL4	protein_coding	7825.26	0.288433	0.0443712	6.50046	8.00758e-11	7.45887e-09
ENSG00000169618.6	PROKR1	protein_coding	293.185	1.19072	0.183543	6.48739	8.73346e-11	8.09079e-09
ENSG00000100941.8	PNN	protein_coding	10504	0.290402	0.0447778	6.48541	8.84924e-11	8.15374e-09
ENSG00000130762.14	ARHGEF16	protein_coding	181.563	-1.50224	0.232107	-6.47216	9.66094e-11	8.85379e-09
ENSG00000122884.12	P4HA1	protein_coding	17599.7	0.255567	0.039535	6.46431	1.0176e-10	9.27593e-09
ENSG00000155368.16	DBI	protein_coding	4703.3	0.375876	0.0584144	6.43465	1.23758e-10	1.12211e-08
ENSG00000277443.2	MARCKS	protein_coding	2687.34	-0.405763	0.0634871	-6.39127	1.64515e-10	1.48377e-08
ENSG00000134013.15	LOXL2	protein_coding	3771.49	-0.356413	0.0558188	-6.38518	1.71198e-10	1.53592e-08
ENSG00000255346.9	NOX5	protein_coding	20262.5	0.225234	0.0353442	6.37258	1.8587e-10	1.65881e-08
ENSG00000115461.4	IGFBP5	protein_coding	30810.8	-0.2305	0.0361871	-6.36966	1.89445e-10	1.68192e-08
ENSG00000101188.4	NTSR1	protein_coding	4377.43	-0.347924	0.0546698	-6.3641	1.96438e-10	1.73496e-08
ENSG00000076770.14	MBNL3	protein_coding	373.583	-1.03742	0.163231	-6.35553	2.07716e-10	1.82511e-08
ENSG00000123384.13	LRP1	protein_coding	8785.18	-0.297654	0.0468779	-6.34955	2.15949e-10	1.88772e-08
ENSG00000058085.14	LAMC2	protein_coding	3161.77	-0.416412	0.0658334	-6.32523	2.52851e-10	2.19903e-08
ENSG00000108679.12	LGALS3BP	protein_coding	11321.9	-0.255747	0.0405533	-6.30645	2.85504e-10	2.4704e-08
ENSG00000134954.14	ETS1	protein_coding	3712.01	-0.370805	0.059145	-6.26942	3.62403e-10	3.11996e-08
ENSG00000116285.12	ERRFI1	protein_coding	9422.37	0.265786	0.0425745	6.24286	4.29642e-10	3.68024e-08
ENSG00000138166.5	DUSP5	protein_coding	1645.12	-0.48814	0.0783874	-6.22728	4.74607e-10	4.04508e-08
ENSG00000116711.9	PLA2G4A	protein_coding	2949.85	0.38342	0.0617452	6.20971	5.30837e-10	4.50181e-08
ENSG00000181885.18	CLDN7	protein_coding	97.9184	-1.98186	0.32036	-6.18634	6.15776e-10	5.1963e-08
ENSG00000091140.13	DLD	protein_coding	11223.5	0.263665	0.0428468	6.15368	7.5704e-10	6.3569e-08
ENSG00000139289.13	PHLDA1	protein_coding	9218.18	-0.276702	0.0449711	-6.15289	7.60837e-10	6.35746e-08
ENSG00000137642.12	SORL1	protein_coding	1872.36	-0.473278	0.0769459	-6.15079	7.70972e-10	6.41073e-08
ENSG00000188549.12	C15orf52	protein_coding	3481.57	-0.380798	0.0620004	-6.14186	8.15584e-10	6.74876e-08
ENSG00000140563.14	MCTP2	protein_coding	4362.78	0.354867	0.0578466	6.13462	8.53623e-10	6.9956e-08
ENSG00000183742.12	MACC1	protein_coding	50.151	-3.03575	0.494814	-6.13514	8.50852e-10	6.9956e-08
ENSG00000166012.16	TAF1D	protein_coding	5032.26	0.324097	0.0529355	6.12249	9.21225e-10	7.51349e-08
ENSG00000137309.19	HMGA1	protein_coding	61870.6	-0.187214	0.0307281	-6.0926	1.11088e-09	9.0172e-08
ENSG00000166165.12	CKB	protein_coding	7426.04	0.298475	0.0491867	6.06819	1.29358e-09	1.04504e-07
ENSG00000119138.4	KLF9	protein_coding	129.114	1.66448	0.274609	6.06127	1.35055e-09	1.08592e-07
ENSG00000129116.17	PALLD	protein_coding	2170	-0.435086	0.0720542	-6.03832	1.55729e-09	1.24627e-07
ENSG00000137962.12	ARHGAP29	protein_coding	21948.2	-0.213527	0.0354488	-6.02352	1.70666e-09	1.35942e-07
ENSG00000176788.8	BASP1	protein_coding	4026.79	-0.331396	0.0551832	-6.00538	1.90883e-09	1.51339e-07
ENSG00000196876.15	SCN8A	protein_coding	963.005	-0.596357	0.0995206	-5.9923	2.06895e-09	1.63275e-07
ENSG00000062038.13	CDH3	protein_coding	694.127	-0.69945	0.11722	-5.96699	2.41676e-09	1.89844e-07
ENSG00000137331.11	IER3	protein_coding	4565.32	-0.309285	0.0518657	-5.9632	2.4734e-09	1.93402e-07
ENSG00000214049.7	UCA1	lincRNA	47.052	3.0638	0.514065	5.95996	2.52302e-09	1.96381e-07
ENSG00000273590.4	SMIM11B	protein_coding	542.107	0.802769	0.135298	5.93336	2.96793e-09	2.29961e-07
ENSG00000221978.11	CCNL2	protein_coding	11326	0.275691	0.0464784	5.93159	3.00022e-09	2.3141e-07
ENSG00000135636.13	DYSF	protein_coding	130.918	-1.61604	0.273919	-5.8997	3.64169e-09	2.79623e-07
ENSG00000151208.16	DLG5	protein_coding	14307.7	-0.236833	0.040173	-5.89532	3.73962e-09	2.85855e-07
ENSG00000142676.13	RPL11	protein_coding	21397.9	0.28107	0.0478447	5.87464	4.23758e-09	3.21039e-07
ENSG00000134294.13	SLC38A2	protein_coding	37531	0.201221	0.0342504	5.87499	4.22875e-09	3.21039e-07
ENSG00000046604.12	DSG2	protein_coding	3305.19	-0.347455	0.0591942	-5.86974	4.36467e-09	3.29204e-07
ENSG00000127954.12	STEAP4	protein_coding	5992.68	0.294341	0.0501695	5.86693	4.43941e-09	3.33366e-07
ENSG00000163083.5	INHBB	protein_coding	7830.03	-0.256565	0.0437945	-5.85837	4.67432e-09	3.49467e-07
ENSG00000160180.15	TFF3	protein_coding	638.328	0.717732	0.122564	5.85598	4.74206e-09	3.52983e-07
ENSG00000188157.14	AGRN	protein_coding	20537.4	-0.269935	0.0461316	-5.85141	4.87423e-09	3.61244e-07
ENSG00000171004.18	HS6ST2	protein_coding	48.0656	-2.96081	0.506597	-5.8445	5.08098e-09	3.74937e-07
ENSG00000163364.9	AC017048.3	lincRNA	264.782	-1.10127	0.188585	-5.83966	5.23074e-09	3.84324e-07
ENSG00000173262.11	SLC2A14	protein_coding	39.8149	8.74657	1.50864	5.79766	6.7248e-09	4.91978e-07
ENSG00000107438.8	PDLIM1	protein_coding	28522.3	0.190276	0.032872	5.78839	7.10628e-09	5.17665e-07
ENSG00000165025.14	SYK	protein_coding	38.9436	-8.73989	1.51116	-5.78357	7.3133e-09	5.30479e-07
ENSG00000124767.6	GLO1	protein_coding	31657.1	0.193354	0.0334448	5.78128	7.41354e-09	5.35471e-07
ENSG00000006468.13	ETV1	protein_coding	5769.4	0.291193	0.0504939	5.76689	8.07465e-09	5.80762e-07
ENSG00000026559.13	KCNG1	protein_coding	3156.98	0.353642	0.0613572	5.76366	8.23098e-09	5.89518e-07
ENSG00000163739.4	CXCL1	protein_coding	1407.5	-0.528414	0.0918265	-5.75449	8.69049e-09	6.19825e-07
ENSG00000218336.8	TENM3	protein_coding	461.26	-0.829332	0.144198	-5.75133	8.85446e-09	6.28888e-07
ENSG00000141429.13	GALNT1	protein_coding	6353.22	0.269985	0.0470208	5.74183	9.36585e-09	6.62449e-07
ENSG00000106665.15	CLIP2	protein_coding	7073.67	-0.277942	0.0484715	-5.73414	9.80055e-09	6.90332e-07
ENSG00000275395.5	FCGBP	protein_coding	482.209	0.791469	0.138432	5.71739	1.08174e-08	7.58821e-07
ENSG00000108654.14	DDX5	protein_coding	37968.5	0.198581	0.0347693	5.71138	1.12065e-08	7.82896e-07
ENSG00000132432.13	SEC61G	protein_coding	4964.29	0.309585	0.0544256	5.68822	1.28369e-08	8.93135e-07
ENSG00000149485.18	FADS1	protein_coding	11303.6	0.230615	0.040572	5.6841	1.31505e-08	9.11233e-07
ENSG00000115414.18	FN1	protein_coding	5118.24	-0.289475	0.0509577	-5.6807	1.34142e-08	9.25745e-07
ENSG00000205336.11	ADGRG1	protein_coding	902.143	-0.602415	0.10629	-5.66765	1.44773e-08	9.91793e-07
ENSG00000065361.15	ERBB3	protein_coding	263.99	-1.10436	0.194857	-5.66752	1.44876e-08	9.91793e-07
ENSG00000078687.17	TNRC6C	protein_coding	1327.29	0.498211	0.0879422	5.66521	1.46847e-08	1.00126e-06
ENSG00000142634.12	EFHD2	protein_coding	8122.89	-0.268755	0.0475653	-5.65023	1.60236e-08	1.0882e-06
ENSG00000122565.18	CBX3	protein_coding	13811.7	0.241677	0.0428441	5.64086	1.69206e-08	1.14456e-06
ENSG00000185567.6	AHNAK2	protein_coding	10199.9	-0.261243	0.0463276	-5.63903	1.71006e-08	1.15216e-06
ENSG00000114942.13	EEF1B2	protein_coding	12108	0.228928	0.0406352	5.63373	1.7635e-08	1.18349e-06
ENSG00000106537.7	TSPAN13	protein_coding	7070.01	0.255077	0.0454254	5.61529	1.96232e-08	1.31175e-06
ENSG00000259820.1	AC083843.1	lincRNA	514.135	0.768267	0.136982	5.60854	2.04038e-08	1.35861e-06
ENSG00000126878.12	AIF1L	protein_coding	284.946	-1.0084	0.17998	-5.60284	2.10866e-08	1.39861e-06
ENSG00000182568.16	SATB1	protein_coding	262.459	-1.04593	0.186884	-5.59668	2.18501e-08	1.44363e-06
ENSG00000214814.7	FER1L6	protein_coding	220.506	1.14223	0.204388	5.58854	2.28991e-08	1.50709e-06
ENSG00000177283.7	FZD8	protein_coding	20407.4	-0.243416	0.0436022	-5.58266	2.36872e-08	1.55297e-06
ENSG00000211772.11	TRBC2	TR_C_gene	1527.38	-0.456718	0.0820119	-5.56892	2.56317e-08	1.67402e-06
ENSG00000197977.3	ELOVL2	protein_coding	1013.99	-0.579756	0.104432	-5.55151	2.83206e-08	1.84257e-06
ENSG00000151651.15	ADAM8	protein_coding	1528.72	-0.478293	0.0861852	-5.5496	2.86329e-08	1.8558e-06
ENSG00000158445.9	KCNB1	protein_coding	323.153	0.95901	0.172886	5.54706	2.90505e-08	1.87574e-06
ENSG00000117592.8	PRDX6	protein_coding	23735.1	0.188962	0.0341995	5.52527	3.28978e-08	2.11614e-06
ENSG00000116251.9	RPL22	protein_coding	27115	0.234997	0.0426093	5.51515	3.48477e-08	2.23314e-06
ENSG00000146555.18	SDK1	protein_coding	1681.42	0.435296	0.0789773	5.51166	3.55456e-08	2.26933e-06
ENSG00000182795.12	C1orf116	protein_coding	295.087	-0.975536	0.17717	-5.50621	3.66646e-08	2.33203e-06
ENSG00000055118.14	KCNH2	protein_coding	235.302	1.12001	0.204	5.49026	4.01337e-08	2.54319e-06
ENSG00000142173.14	COL6A2	protein_coding	64384.2	-0.213401	0.0388871	-5.48771	4.07172e-08	2.57061e-06
ENSG00000132274.15	TRIM22	protein_coding	47.3415	2.70098	0.492378	5.48557	4.12129e-08	2.5923e-06
ENSG00000179593.15	ALOX15B	protein_coding	38.9068	3.11029	0.567482	5.48086	4.23266e-08	2.65257e-06
ENSG00000121577.13	POPDC2	protein_coding	68.2698	2.11121	0.38644	5.46324	4.67525e-08	2.91921e-06
ENSG00000140374.15	ETFA	protein_coding	4030.94	0.309792	0.0567248	5.46132	4.72599e-08	2.94012e-06
ENSG00000182957.15	SPATA13	protein_coding	1585.29	-0.432451	0.079448	-5.44319	5.2334e-08	3.24395e-06
ENSG00000169047.5	IRS1	protein_coding	4108.54	-0.296451	0.0545093	-5.43854	5.37199e-08	3.31779e-06
ENSG00000157227.12	MMP14	protein_coding	5404.05	-0.265187	0.0488263	-5.43123	5.59671e-08	3.4441e-06
ENSG00000172572.6	PDE3A	protein_coding	563.641	-0.702402	0.129351	-5.43022	5.62837e-08	3.45112e-06
ENSG00000101670.11	LIPG	protein_coding	1853.31	0.402967	0.0744081	5.41564	6.10715e-08	3.73127e-06
ENSG00000150995.18	ITPR1	protein_coding	2400.45	-0.361956	0.0669208	-5.40872	6.34773e-08	3.8644e-06
ENSG00000128595.16	CALU	protein_coding	38914.1	0.182868	0.0338374	5.40432	6.50554e-08	3.94638e-06
ENSG00000158710.14	TAGLN2	protein_coding	27241.8	-0.186002	0.0344546	-5.39846	6.72147e-08	4.06291e-06
ENSG00000241978.9	AKAP2	protein_coding	6750.82	-0.286966	0.0533397	-5.37997	7.44996e-08	4.48735e-06
ENSG00000168477.18	TNXB	protein_coding	1012.26	-0.536409	0.0997823	-5.37579	7.62457e-08	4.57635e-06
ENSG00000187193.8	MT1X	protein_coding	290.66	0.952529	0.177384	5.36987	7.87915e-08	4.71256e-06
ENSG00000140937.13	CDH11	protein_coding	16353.6	-0.19426	0.0362062	-5.36537	8.07851e-08	4.8149e-06
ENSG00000175591.11	P2RY2	protein_coding	362.639	-0.856483	0.159694	-5.36327	8.17294e-08	4.85421e-06
ENSG00000159840.15	ZYX	protein_coding	23761.3	-0.186519	0.0347814	-5.36261	8.20284e-08	4.85506e-06
ENSG00000127603.25	MACF1	protein_coding	16599.5	-0.193634	0.0361294	-5.35946	8.34704e-08	4.92331e-06
ENSG00000163406.10	SLC15A2	protein_coding	50.5214	2.51222	0.469147	5.35486	8.56207e-08	5.03272e-06
ENSG00000167548.14	KMT2D	protein_coding	5008.34	-0.287444	0.0537025	-5.35253	8.67314e-08	5.0805e-06
ENSG00000163624.5	CDS1	protein_coding	140.913	-1.48597	0.277762	-5.3498	8.80524e-08	5.14021e-06
ENSG00000157570.11	TSPAN18	protein_coding	117.831	1.53403	0.286832	5.34818	8.88443e-08	5.16874e-06
ENSG00000158825.5	CDA	protein_coding	653.008	-0.642216	0.120136	-5.34576	9.00365e-08	5.22028e-06
ENSG00000128510.10	CPA4	protein_coding	1516.65	-0.431142	0.0806965	-5.34276	9.1541e-08	5.28952e-06
ENSG00000160789.19	LMNA	protein_coding	17182.1	-0.217871	0.040884	-5.32902	9.87454e-08	5.68654e-06
ENSG00000164687.10	FABP5	protein_coding	8272.97	0.269944	0.0510592	5.28688	1.24423e-07	7.14112e-06
ENSG00000143469.18	SYT14	protein_coding	374.799	-0.849587	0.160787	-5.28394	1.26433e-07	7.23212e-06
ENSG00000127922.9	SEM1	protein_coding	3577.44	0.351893	0.0669243	5.25808	1.45568e-07	8.29886e-06
ENSG00000160191.17	PDE9A	protein_coding	119.799	1.49892	0.285125	5.25705	1.46385e-07	8.31759e-06
ENSG00000124783.12	SSR1	protein_coding	13867.5	0.205878	0.0391985	5.25219	1.50298e-07	8.51156e-06
ENSG00000138207.13	RBP4	protein_coding	1008.06	0.527618	0.100753	5.23675	1.63425e-07	9.2243e-06
ENSG00000231500.6	RPS18	protein_coding	32307.8	0.169643	0.0324664	5.22517	1.73996e-07	9.78859e-06
ENSG00000038382.19	TRIO	protein_coding	8263.37	-0.232238	0.044557	-5.21215	1.86662e-07	1.04666e-05
ENSG00000176597.11	B3GNT5	protein_coding	5646.52	0.253619	0.0486855	5.20933	1.89523e-07	1.05921e-05
ENSG00000175471.19	MCTP1	protein_coding	428.661	-0.784973	0.151069	-5.19612	2.0349e-07	1.13356e-05
ENSG00000012171.19	SEMA3B	protein_coding	652.134	-0.670121	0.129098	-5.19081	2.09381e-07	1.16258e-05
ENSG00000257017.8	HP	protein_coding	24.3266	8.03512	1.55008	5.18369	2.17541e-07	1.20396e-05
ENSG00000100554.11	ATP6V1D	protein_coding	5564.56	0.271248	0.0523424	5.18218	2.19312e-07	1.20984e-05
ENSG00000110987.8	BCL7A	protein_coding	1598.3	-0.4102	0.0792312	-5.17725	2.25176e-07	1.23818e-05
ENSG00000108946.14	PRKAR1A	protein_coding	30967.4	0.167795	0.0324139	5.17664	2.25921e-07	1.23828e-05
ENSG00000146966.12	DENND2A	protein_coding	963.631	-0.516026	0.0999195	-5.16441	2.41197e-07	1.31777e-05
ENSG00000173706.12	HEG1	protein_coding	1615.21	0.442322	0.0857257	5.15974	2.47297e-07	1.34678e-05
ENSG00000163283.6	ALPP	protein_coding	287.43	0.937767	0.181911	5.15507	2.53531e-07	1.37633e-05
ENSG00000168564.5	CDKN2AIP	protein_coding	4179.37	0.282964	0.054925	5.15183	2.57963e-07	1.39595e-05
ENSG00000196562.14	SULF2	protein_coding	33166.3	-0.164852	0.0320045	-5.1509	2.59239e-07	1.39841e-05
ENSG00000139514.12	SLC7A1	protein_coding	5397.85	-0.251147	0.0488046	-5.14597	2.66138e-07	1.4311e-05
ENSG00000118515.11	SGK1	protein_coding	998.362	0.501916	0.0976479	5.14006	2.74645e-07	1.4722e-05
ENSG00000087303.17	NID2	protein_coding	1084.88	0.499544	0.0973126	5.13339	2.84566e-07	1.5206e-05
ENSG00000156299.13	TIAM1	protein_coding	662.644	-0.609583	0.119036	-5.12101	3.03906e-07	1.61887e-05
ENSG00000134709.10	HOOK1	protein_coding	120.384	-1.42414	0.278491	-5.11377	3.15786e-07	1.67691e-05
ENSG00000105854.12	PON2	protein_coding	4499.63	0.292617	0.0572512	5.1111	3.20296e-07	1.69558e-05
ENSG00000175455.14	CCDC14	protein_coding	4833.03	0.300367	0.0588265	5.10598	3.29083e-07	1.73038e-05
ENSG00000144711.14	IQSEC1	protein_coding	4752.77	-0.264548	0.0518239	-5.10474	3.31246e-07	1.73038e-05
ENSG00000100558.8	PLEK2	protein_coding	1662.38	-0.397885	0.0779232	-5.10612	3.28835e-07	1.73038e-05
ENSG00000155816.19	FMN2	protein_coding	669.104	-0.601024	0.117742	-5.10459	3.3152e-07	1.73038e-05
ENSG00000135477.11	RP11-845M18.1	transcribed_unprocessed_pseudogene	391.478	-0.78251	0.153303	-5.10434	3.31946e-07	1.73038e-05
ENSG00000178209.14	PLEC	protein_coding	99330.2	-0.203859	0.0399442	-5.1036	3.33252e-07	1.73189e-05
ENSG00000129354.11	AP1M2	protein_coding	25.7156	-5.07352	0.994672	-5.1007	3.38401e-07	1.75331e-05
ENSG00000156976.16	EIF4A2	protein_coding	14995.6	0.230665	0.0452361	5.09913	3.4122e-07	1.76256e-05
ENSG00000021826.15	CPS1	protein_coding	438.496	-0.751297	0.147618	-5.08947	3.59075e-07	1.84918e-05
ENSG00000189058.8	APOD	protein_coding	27.9117	3.88248	0.763512	5.08503	3.67575e-07	1.88725e-05
ENSG00000100644.16	HIF1A	protein_coding	49738.6	0.171063	0.0336483	5.08384	3.6988e-07	1.89339e-05
ENSG00000079931.14	MOXD1	protein_coding	273.59	-0.930497	0.183101	-5.08189	3.73704e-07	1.90723e-05
ENSG00000170961.6	HAS2	protein_coding	2629.67	0.324336	0.0639364	5.07279	3.92019e-07	1.99473e-05
ENSG00000184304.14	PRKD1	protein_coding	568.965	0.647085	0.127641	5.06958	3.9869e-07	2.02264e-05
ENSG00000178662.15	CSRNP3	protein_coding	264.573	-0.939865	0.185968	-5.0539	4.32885e-07	2.1896e-05
ENSG00000072657.8	TRHDE	protein_coding	595.082	-0.647324	0.128214	-5.04877	4.44674e-07	2.24258e-05
ENSG00000127184.12	COX7C	protein_coding	12604.5	0.239117	0.0473713	5.04773	4.47101e-07	2.24817e-05
ENSG00000169045.17	HNRNPH1	protein_coding	18463.4	0.191699	0.0380012	5.04455	4.54592e-07	2.27911e-05
ENSG00000100234.11	TIMP3	protein_coding	7581.16	0.233278	0.0463629	5.03158	4.86457e-07	2.43172e-05
ENSG00000166710.17	B2M	protein_coding	21364.9	0.217736	0.0434114	5.01565	5.28533e-07	2.63432e-05
ENSG00000174738.12	NR1D2	protein_coding	2314.53	-0.369575	0.0737793	-5.0092	5.46579e-07	2.71632e-05
ENSG00000124225.15	PMEPA1	protein_coding	1999.33	-0.378088	0.0755735	-5.00292	5.64691e-07	2.79818e-05
ENSG00000184363.9	PKP3	protein_coding	2671.02	-0.344071	0.0688784	-4.99534	5.87316e-07	2.90185e-05
ENSG00000065150.18	IPO5	protein_coding	26692.4	-0.177986	0.0356475	-4.99294	5.94661e-07	2.92965e-05
ENSG00000152270.8	PDE3B	protein_coding	147.308	1.26025	0.253854	4.96447	6.88892e-07	3.38411e-05
ENSG00000184557.4	SOCS3	protein_coding	927.891	-0.515551	0.103924	-4.96084	7.01903e-07	3.43812e-05
ENSG00000137504.13	CREBZF	protein_coding	3785.43	0.290605	0.0588149	4.94102	7.77164e-07	3.79586e-05
ENSG00000159263.15	SIM2	protein_coding	5499.78	-0.24117	0.0488365	-4.93832	7.87988e-07	3.83773e-05
ENSG00000162734.12	PEA15	protein_coding	6202.66	-0.234521	0.0475044	-4.93683	7.94042e-07	3.85619e-05
ENSG00000048052.21	HDAC9	protein_coding	300.704	-0.864319	0.175118	-4.93563	7.98921e-07	3.86887e-05
ENSG00000164919.10	COX6C	protein_coding	5806.91	0.279786	0.0567391	4.93109	8.1771e-07	3.94863e-05
ENSG00000089009.15	RPL6	protein_coding	43703.8	0.190068	0.0385773	4.92695	8.35238e-07	4.02189e-05
ENSG00000170312.15	CDK1	protein_coding	9801.29	0.205493	0.0417409	4.92306	8.52032e-07	4.09119e-05
ENSG00000215182.8	MUC5AC	protein_coding	46331.1	0.184172	0.0374507	4.91773	8.75527e-07	4.1922e-05
ENSG00000198788.8	MUC2	protein_coding	2548.49	0.320652	0.0652216	4.91635	8.81749e-07	4.21017e-05
ENSG00000053747.15	LAMA3	protein_coding	6906.63	-0.2408	0.0489857	-4.91573	8.84524e-07	4.21162e-05
ENSG00000114770.16	ABCC5	protein_coding	2663.33	0.317025	0.0645737	4.9095	9.13103e-07	4.33558e-05
ENSG00000180530.10	NRIP1	protein_coding	4618.94	-0.257059	0.0523659	-4.90891	9.15841e-07	4.33651e-05
ENSG00000140612.13	SEC11A	protein_coding	5638.8	0.264435	0.053905	4.90558	9.31536e-07	4.3986e-05
ENSG00000139645.9	ANKRD52	protein_coding	5752.06	-0.236174	0.0482005	-4.89984	9.5917e-07	4.51658e-05
ENSG00000131051.22	RBM39	protein_coding	10454	0.21198	0.0434742	4.876	1.08261e-06	5.07159e-05
ENSG00000261534.1	RP11-244O19.1	sense_overlapping	1735.07	-0.372959	0.0764899	-4.87593	1.08299e-06	5.07159e-05
ENSG00000138172.10	CALHM2	protein_coding	47.4109	-2.36506	0.48512	-4.8752	1.087e-06	5.07643e-05
ENSG00000163235.15	TGFA	protein_coding	1739.15	-0.371303	0.0761765	-4.87425	1.09222e-06	5.0869e-05
ENSG00000261713.6	RP11-161M6.4	processed_transcript	2199.04	0.349707	0.0720148	4.85604	1.19758e-06	5.56236e-05
ENSG00000196924.15	FLNA	protein_coding	107879	-0.161392	0.0332748	-4.85027	1.23292e-06	5.71096e-05
ENSG00000183963.18	SMTN	protein_coding	4972.8	-0.294323	0.060748	-4.84499	1.26619e-06	5.84917e-05
ENSG00000156467.9	UQCRB	protein_coding	11079.3	0.259368	0.0535893	4.83992	1.29892e-06	5.98417e-05
ENSG00000147010.17	SH3KBP1	protein_coding	4743.54	-0.245801	0.0509027	-4.82885	1.37322e-06	6.30942e-05
ENSG00000160888.6	IER2	protein_coding	10010.4	-0.210116	0.043525	-4.82748	1.38273e-06	6.33602e-05
ENSG00000166949.15	SMAD3	protein_coding	5766.37	-0.245827	0.0510509	-4.81534	1.46951e-06	6.70877e-05
ENSG00000124875.9	CXCL6	protein_coding	957.661	-0.48567	0.100866	-4.81501	1.47195e-06	6.70877e-05
ENSG00000135272.10	MDFIC	protein_coding	434.392	-0.75591	0.15712	-4.81105	1.5014e-06	6.82474e-05
ENSG00000242265.5	PEG10	protein_coding	18769.8	0.189476	0.0394172	4.80694	1.53258e-06	6.94798e-05
ENSG00000117984.13	CTSD	protein_coding	23738.6	0.173969	0.0361975	4.80611	1.53898e-06	6.95848e-05
ENSG00000168615.11	ADAM9	protein_coding	16366.2	0.173852	0.03635	4.78273	1.72931e-06	7.75733e-05
ENSG00000180537.12	RNF182	protein_coding	1119.34	-0.443796	0.0927718	-4.78373	1.72068e-06	7.75733e-05
ENSG00000131773.13	KHDRBS3	protein_coding	855.218	-0.501278	0.104802	-4.78309	1.72624e-06	7.75733e-05
ENSG00000147996.16	CBWD5	protein_coding	1017.3	0.49931	0.104646	4.77143	1.82927e-06	8.18417e-05
ENSG00000023608.4	SNAPC1	protein_coding	8152.4	0.219256	0.0459705	4.76949	1.84689e-06	8.24137e-05
ENSG00000254870.5	ATP6V1G2-DDX39B	protein_coding	1380.76	0.502415	0.105452	4.76439	1.89423e-06	8.40863e-05
ENSG00000133835.15	HSD17B4	protein_coding	4501.66	0.252007	0.0528897	4.76477	1.89069e-06	8.40863e-05
ENSG00000198242.13	RPL23A	protein_coding	20448.1	0.22495	0.0472331	4.76255	1.91162e-06	8.46377e-05
ENSG00000122566.20	HNRNPA2B1	protein_coding	66160.7	0.155958	0.0327503	4.76202	1.91669e-06	8.46423e-05
ENSG00000114738.10	MAPKAPK3	protein_coding	5644.84	-0.234698	0.0493072	-4.75991	1.93682e-06	8.53103e-05
ENSG00000141219.15	C17orf80	protein_coding	3183.55	0.283306	0.0595494	4.7575	1.96001e-06	8.61093e-05
ENSG00000117906.13	RCN2	protein_coding	3830.5	0.269196	0.0565967	4.7564	1.97081e-06	8.63608e-05
ENSG00000134531.9	EMP1	protein_coding	6316.87	-0.23889	0.0502363	-4.75533	1.98126e-06	8.65963e-05
ENSG00000173674.10	EIF1AX	protein_coding	18174	0.174713	0.0367476	4.7544	1.99038e-06	8.67725e-05
ENSG00000171992.12	SYNPO	protein_coding	1843.25	-0.352056	0.0740657	-4.7533	2.00127e-06	8.70244e-05
ENSG00000144381.16	HSPD1	protein_coding	55130.5	0.203809	0.0429593	4.74423	2.09297e-06	9.07807e-05
ENSG00000167306.19	MYO5B	protein_coding	203.278	-1.01071	0.213071	-4.7435	2.10052e-06	9.08769e-05
ENSG00000275896.5	PRSS2	protein_coding	414.688	0.708513	0.149414	4.74195	2.11666e-06	9.12506e-05
ENSG00000105821.14	DNAJC2	protein_coding	4137.34	0.269582	0.056854	4.74165	2.11987e-06	9.12506e-05
ENSG00000161642.17	ZNF385A	protein_coding	555.342	-0.613721	0.129465	-4.74046	2.13238e-06	9.15582e-05
ENSG00000168497.4	SDPR	protein_coding	31.2667	2.96868	0.626536	4.73824	2.15585e-06	9.23331e-05
ENSG00000277586.2	NEFL	protein_coding	11183.9	-0.190449	0.0402241	-4.73469	2.19391e-06	9.37278e-05
ENSG00000196262.13	PPIA	protein_coding	77987.6	0.185625	0.0392371	4.73085	2.23579e-06	9.52781e-05
ENSG00000072682.18	P4HA2	protein_coding	2787.43	0.297705	0.0631328	4.71553	2.41086e-06	0.000102483
ENSG00000279806.1	RP11-58O9.2	TEC	29.9261	-3.19578	0.680147	-4.69867	2.61861e-06	0.000111037
ENSG00000137825.10	ITPKA	protein_coding	514.729	0.632112	0.134636	4.69498	2.66628e-06	0.000112778
ENSG00000117500.12	TMED5	protein_coding	6993.62	0.21694	0.0462577	4.68982	2.73442e-06	0.000115374
ENSG00000115758.12	ODC1	protein_coding	58198.1	0.166306	0.0355237	4.68154	2.84733e-06	0.000119841
ENSG00000137818.11	RPLP1	protein_coding	28618.2	0.172603	0.0369665	4.66916	3.02433e-06	0.000126977
ENSG00000175592.8	FOSL1	protein_coding	33602.7	-0.155648	0.0334213	-4.65715	3.20617e-06	0.000134281
ENSG00000188293.5	IGFL1	protein_coding	16.0991	7.43996	1.60115	4.64662	3.37412e-06	0.000140969
ENSG00000144749.13	LRIG1	protein_coding	892.029	0.479438	0.103312	4.64069	3.47256e-06	0.000144529
ENSG00000260401.1	RP11-800A3.4	sense_overlapping	195.352	-1.00036	0.215573	-4.64046	3.4763e-06	0.000144529
ENSG00000164683.16	HEY1	protein_coding	1152.62	0.440047	0.0949176	4.6361	3.55048e-06	0.000146897
ENSG00000168685.14	IL7R	protein_coding	2002.54	-0.359842	0.0776114	-4.63646	3.54423e-06	0.000146897
ENSG00000129993.14	CBFA2T3	protein_coding	15.8585	7.41816	1.60354	4.6261	3.72611e-06	0.00015379
ENSG00000138623.10	SEMA7A	protein_coding	3158.08	-0.276878	0.05989	-4.6231	3.78042e-06	0.000155655
ENSG00000142973.13	CYP4B1	protein_coding	15.8153	7.41471	1.6044	4.62148	3.81012e-06	0.0001565
ENSG00000137819.13	PAQR5	protein_coding	701.231	-0.53158	0.115388	-4.60691	4.087e-06	0.000167469
ENSG00000106069.22	CHN2	protein_coding	212.567	0.965071	0.209565	4.60511	4.12244e-06	0.000168516
ENSG00000176171.11	BNIP3	protein_coding	7913.58	0.205003	0.0445281	4.60391	4.14639e-06	0.00016909
ENSG00000156711.16	MAPK13	protein_coding	376.484	-0.726749	0.15801	-4.59938	4.23757e-06	0.000172395
ENSG00000167653.4	PSCA	protein_coding	65.4385	1.80423	0.392606	4.59551	4.31699e-06	0.000175208
ENSG00000197930.12	ERO1A	protein_coding	13533.1	0.203882	0.044383	4.5937	4.35446e-06	0.000176309
ENSG00000182871.14	COL18A1	protein_coding	3364.09	-0.300341	0.0654646	-4.58784	4.47856e-06	0.000180904
ENSG00000106829.18	TLE4	protein_coding	135.197	-1.21217	0.26448	-4.5832	4.57903e-06	0.000184525
ENSG00000272398.5	CD24	protein_coding	382.127	-0.719608	0.157178	-4.57831	4.68741e-06	0.000188447
ENSG00000139209.15	SLC38A4	protein_coding	21.7277	5.39704	1.17935	4.57627	4.73339e-06	0.000189848
ENSG00000284762.1	CTC-337B15.3	protein_coding	15.2909	7.36641	1.61141	4.57141	4.84447e-06	0.000193847
ENSG00000096088.16	PGC	protein_coding	30.9278	6.92915	1.51678	4.56833	4.91625e-06	0.000196258
ENSG00000138780.14	GSTCD	protein_coding	2651.71	0.296722	0.0650024	4.56478	5.00013e-06	0.000199141
ENSG00000178150.9	ZNF114	protein_coding	47.9712	2.0982	0.460001	4.56128	5.08416e-06	0.000201557
ENSG00000180398.11	MCFD2	protein_coding	14756	0.16949	0.0371584	4.56127	5.08444e-06	0.000201557
ENSG00000117868.15	ESYT2	protein_coding	13698.5	0.175997	0.0386175	4.55745	5.17775e-06	0.000204779
ENSG00000100345.21	MYH9	protein_coding	40681.7	-0.143024	0.0313964	-4.55544	5.22772e-06	0.000206277
ENSG00000051108.14	HERPUD1	protein_coding	3072.05	0.279733	0.0614914	4.54914	5.38643e-06	0.000212049
ENSG00000171223.5	JUNB	protein_coding	2495.09	-0.309332	0.0680506	-4.54562	5.47744e-06	0.000215135
ENSG00000004799.7	PDK4	protein_coding	146.952	1.1386	0.250571	4.54403	5.51895e-06	0.000215771
ENSG00000276550.4	HERC2P2	transcribed_unprocessed_pseudogene	3937.31	0.257624	0.0566927	4.54422	5.51396e-06	0.000215771
ENSG00000160179.18	ABCG1	protein_coding	2747.47	0.295735	0.0650988	4.54286	5.54968e-06	0.000216476
ENSG00000064651.13	SLC12A2	protein_coding	13238	0.186435	0.0410478	4.5419	5.57506e-06	0.000216969
ENSG00000169239.12	CA5B	protein_coding	3172.59	0.273865	0.0604423	4.53102	5.86985e-06	0.000227921
ENSG00000167767.13	KRT80	protein_coding	1431.33	-0.377777	0.0834836	-4.52516	6.03494e-06	0.000233799
ENSG00000169851.15	PCDH7	protein_coding	48.0421	-2.08158	0.460219	-4.52303	6.09616e-06	0.000235635
ENSG00000003436.15	TFPI	protein_coding	3023.38	0.28643	0.0633771	4.51946	6.1999e-06	0.000239103
ENSG00000198931.10	APRT	protein_coding	3665.01	0.255594	0.0566015	4.51567	6.31161e-06	0.000242862
ENSG00000240801.1	AC132217.4	3prime_overlapping_ncRNA	3023.15	0.772905	0.171215	4.51425	6.35426e-06	0.000243952
ENSG00000198918.7	RPL39	protein_coding	14348.3	0.22117	0.0490147	4.51232	6.41224e-06	0.000245074
ENSG00000168505.6	GBX2	protein_coding	472.757	-0.627866	0.13914	-4.51249	6.40706e-06	0.000245074
ENSG00000147383.10	NSDHL	protein_coding	2400.23	0.300861	0.0667649	4.50627	6.59781e-06	0.000251602
ENSG00000142319.17	SLC6A3	protein_coding	29.3979	6.8557	1.52163	4.50548	6.62219e-06	0.000251969
ENSG00000184012.11	TMPRSS2	protein_coding	266.945	0.83243	0.185143	4.49615	6.91939e-06	0.00026269
ENSG00000111913.18	RIPOR2	protein_coding	371.581	0.722563	0.16075	4.49495	6.9587e-06	0.000263011
ENSG00000147604.13	RPL7	protein_coding	65569.8	0.182842	0.0406768	4.49499	6.95724e-06	0.000263011
ENSG00000066084.12	DIP2B	protein_coding	5272.67	-0.220671	0.0491199	-4.4925	7.03904e-06	0.000264873
ENSG00000248871.1	TNFSF12-TNFSF13	protein_coding	14.7135	-7.33684	1.63297	-4.49295	7.02426e-06	0.000264873
ENSG00000123131.12	PRDX4	protein_coding	6317.96	0.21902	0.0487584	4.49195	7.05737e-06	0.000264978
ENSG00000169764.15	UGP2	protein_coding	3737.49	0.281576	0.0627361	4.48826	7.18057e-06	0.000267834
ENSG00000177879.15	AP3S1	protein_coding	5288.54	0.269569	0.0600565	4.48859	7.16978e-06	0.000267834
ENSG00000167552.13	TUBA1A	protein_coding	918.126	-0.461966	0.102909	-4.48907	7.15338e-06	0.000267834
ENSG00000213639.9	PPP1CB	protein_coding	10300.8	0.198575	0.0442601	4.48655	7.23846e-06	0.000269404
ENSG00000185246.17	PRPF39	protein_coding	1971.09	0.341167	0.0760966	4.48334	7.34823e-06	0.0002723
ENSG00000139613.11	SMARCC2	protein_coding	4324.42	-0.246076	0.054884	-4.48356	7.34086e-06	0.0002723
ENSG00000175137.10	SH3BP5L	protein_coding	2423.28	-0.301357	0.0672372	-4.48199	7.39495e-06	0.000273437
ENSG00000135114.12	OASL	protein_coding	292.787	-0.790986	0.176573	-4.47965	7.47652e-06	0.000275854
ENSG00000145425.9	RPS3A	protein_coding	16379.6	0.168934	0.0377363	4.4767	7.58067e-06	0.000279093
ENSG00000155265.10	GOLGA7B	protein_coding	33.9975	2.52239	0.565217	4.46269	8.09386e-06	0.000297345
ENSG00000177954.12	RPS27	protein_coding	13774.5	0.224664	0.0504096	4.45678	8.31985e-06	0.00030499
ENSG00000116754.13	SRSF11	protein_coding	6813.44	0.210429	0.0472819	4.45052	8.56614e-06	0.000313051
ENSG00000143416.20	SELENBP1	protein_coding	470.062	-0.634981	0.142684	-4.45026	8.57648e-06	0.000313051
ENSG00000166794.4	PPIB	protein_coding	14205.9	0.175735	0.0395564	4.44265	8.88588e-06	0.000323651
ENSG00000143947.13	RPS27A	protein_coding	21469	0.1812	0.0408036	4.4408	8.96264e-06	0.000325751
ENSG00000101361.16	NOP56	protein_coding	18060.1	0.191853	0.0432178	4.43921	9.02884e-06	0.000327459
ENSG00000160182.2	TFF1	protein_coding	4245.71	0.302961	0.0683218	4.43433	9.23598e-06	0.00033426
ENSG00000118181.10	RPS25	protein_coding	24455.5	0.210678	0.0475331	4.43222	9.32661e-06	0.000335137
ENSG00000142798.18	HSPG2	protein_coding	27589.7	-0.20234	0.0456427	-4.43312	9.28783e-06	0.000335137
ENSG00000175040.5	CHST2	protein_coding	180.974	-0.996599	0.224867	-4.43194	9.33886e-06	0.000335137
ENSG00000184564.9	SLITRK6	protein_coding	183.424	-1.02143	0.230445	-4.43243	9.31772e-06	0.000335137
ENSG00000156642.16	NPTN	protein_coding	5281.56	0.218242	0.0492496	4.43134	9.36481e-06	0.000335363
ENSG00000172115.8	CYCS	protein_coding	18814.9	0.204746	0.0462134	4.43045	9.40355e-06	0.000336044
ENSG00000174021.10	GNG5	protein_coding	4081.28	0.241356	0.0545431	4.42504	9.64249e-06	0.000343862
ENSG00000133030.20	MPRIP	protein_coding	48338.4	-0.141044	0.0318852	-4.42349	9.7121e-06	0.000345621
ENSG00000135549.14	PKIB	protein_coding	5177.33	0.223965	0.0506726	4.41985	9.87701e-06	0.000350757
ENSG00000027075.14	PRKCH	protein_coding	2477.42	0.300337	0.067963	4.41912	9.91039e-06	0.000351095
ENSG00000071082.10	RPL31	protein_coding	10378.4	0.184366	0.0417237	4.41874	9.9277e-06	0.000351095
ENSG00000163399.15	ATP1A1	protein_coding	30814.9	0.143266	0.0324341	4.41716	1.00006e-05	0.00035294
ENSG00000135111.15	TBX3	protein_coding	953.302	-0.44344	0.100417	-4.41597	1.00559e-05	0.00035416
ENSG00000258818.3	RNASE4	protein_coding	512.641	0.599713	0.135885	4.41337	1.01772e-05	0.000357692
ENSG00000188158.14	NHS	protein_coding	297.281	-0.787405	0.178477	-4.4118	1.02513e-05	0.000359557
ENSG00000130720.12	FIBCD1	protein_coding	49.3313	2.00516	0.454589	4.41093	1.02927e-05	0.000360264
ENSG00000166147.13	FBN1	protein_coding	3626.4	-0.24799	0.0562277	-4.41046	1.0315e-05	0.000360305
ENSG00000140391.14	TSPAN3	protein_coding	12048.3	0.186545	0.0423153	4.40846	1.04108e-05	0.000362909
ENSG00000181634.7	TNFSF15	protein_coding	44.1059	-2.23399	0.50767	-4.40048	1.0801e-05	0.000375741
ENSG00000029993.14	HMGB3	protein_coding	6988.65	0.200377	0.0455769	4.39646	1.10033e-05	0.000381224
ENSG00000146197.8	RP3-329A5.4	protein_coding	231.534	-0.879659	0.200067	-4.39682	1.09851e-05	0.000381224
ENSG00000140740.10	UQCRC2	protein_coding	8890.6	0.208565	0.0474896	4.3918	1.12416e-05	0.000387903
ENSG00000179222.17	MAGED1	protein_coding	16703.9	0.161259	0.0367162	4.39203	1.123e-05	0.000387903
ENSG00000254772.9	EEF1G	protein_coding	77020.7	0.130082	0.0296336	4.38967	1.1352e-05	0.000390922
ENSG00000186468.12	RPS23	protein_coding	29529.9	0.190566	0.0434917	4.38166	1.17779e-05	0.000404771
ENSG00000087302.8	C14orf166	protein_coding	10368.1	0.18181	0.0416068	4.36971	1.24413e-05	0.000426708
ENSG00000101311.15	FERMT1	protein_coding	5084.42	-0.238957	0.054745	-4.36491	1.27173e-05	0.000435298
ENSG00000165548.10	TMEM63C	protein_coding	304.795	0.754534	0.172903	4.36393	1.27749e-05	0.000436395
ENSG00000143341.11	HMCN1	protein_coding	1210.38	-0.389001	0.089213	-4.36037	1.29845e-05	0.000442666
ENSG00000157613.10	CREB3L1	protein_coding	10312.7	0.176413	0.0404734	4.35874	1.30814e-05	0.000445082
ENSG00000175745.12	NR2F1	protein_coding	19764.9	0.176993	0.0406309	4.35613	1.32381e-05	0.000449517
ENSG00000141744.3	PNMT	protein_coding	21.8796	3.51826	0.808074	4.35388	1.33749e-05	0.000453258
ENSG00000138385.15	SSB	protein_coding	8389.22	0.245435	0.0564182	4.35028	1.35961e-05	0.00045984
ENSG00000006062.14	MAP3K14	protein_coding	1436.09	-0.372029	0.0856496	-4.34361	1.4016e-05	0.000473103
ENSG00000079819.18	EPB41L2	protein_coding	5134.3	-0.227125	0.0522975	-4.34295	1.40584e-05	0.000473595
ENSG00000087074.7	PPP1R15A	protein_coding	2171.91	-0.301481	0.0694463	-4.3412	1.41704e-05	0.000476426
ENSG00000255302.4	EID1	protein_coding	10084.1	0.175062	0.0403387	4.3398	1.42613e-05	0.00047854
ENSG00000089048.14	ESF1	protein_coding	3638.18	0.267849	0.0617569	4.33715	1.44342e-05	0.000483389
ENSG00000120913.23	PDLIM2	protein_coding	548.787	-0.577431	0.13316	-4.33638	1.4485e-05	0.000484141
ENSG00000151914.19	DST	protein_coding	8913.48	-0.180339	0.0416771	-4.32705	1.51117e-05	0.000504096
ENSG00000164949.7	GEM	protein_coding	579.994	-0.552047	0.127708	-4.32271	1.54122e-05	0.000513118
ENSG00000177570.13	SAMD12	protein_coding	363.915	-0.689215	0.159463	-4.32211	1.54545e-05	0.000513523
ENSG00000186469.8	GNG2	protein_coding	942.186	-0.445724	0.103583	-4.30307	1.68445e-05	0.000558622
ENSG00000063438.16	AHRR	protein_coding	353.936	-0.703394	0.16375	-4.29553	1.74273e-05	0.000576825
ENSG00000152952.11	PLOD2	protein_coding	5850.61	0.212241	0.0494508	4.29196	1.77105e-05	0.000583934
ENSG00000168032.8	ENTPD3	protein_coding	33.0227	-2.51172	0.585202	-4.29206	1.7702e-05	0.000583934
ENSG00000127083.7	OMD	protein_coding	12.3607	7.05907	1.64694	4.28618	1.81768e-05	0.000598151
ENSG00000071054.16	MAP4K4	protein_coding	23610.1	-0.148782	0.034718	-4.28544	1.82379e-05	0.000599004
ENSG00000196656.7	AC004057.1	transcribed_processed_pseudogene	1378.23	-0.456593	0.1066	-4.28324	1.84192e-05	0.000603795
ENSG00000241635.7	UGT1A1	protein_coding	123.053	1.17504	0.274547	4.27993	1.86952e-05	0.000611666
ENSG00000124126.13	PREX1	protein_coding	3085.76	-0.256033	0.0598308	-4.27929	1.87492e-05	0.000612259
ENSG00000125827.8	TMX4	protein_coding	36491.6	0.151449	0.0353966	4.27864	1.88038e-05	0.000612867
ENSG00000158528.11	PPP1R9A	protein_coding	152.473	-1.04765	0.244884	-4.27813	1.88471e-05	0.000613105
ENSG00000130513.6	GDF15	protein_coding	2543.31	0.339141	0.0793955	4.27153	1.94133e-05	0.000630322
ENSG00000215183.4	MSMP	protein_coding	74788.8	0.162066	0.0379606	4.26931	1.96078e-05	0.000635426
ENSG00000109511.11	ANXA10	protein_coding	702.596	0.490337	0.114897	4.2676	1.97585e-05	0.000639096
ENSG00000108582.11	CPD	protein_coding	9655.89	0.1843	0.0432033	4.26587	1.99121e-05	0.000642844
ENSG00000214595.11	EML6	protein_coding	1265.78	0.376763	0.0883648	4.26372	2.01049e-05	0.000647841
ENSG00000131828.13	PDHA1	protein_coding	14932.6	0.169225	0.0397563	4.25656	2.07592e-05	0.000667664
ENSG00000101255.10	TRIB3	protein_coding	4293.56	-0.241177	0.0566894	-4.25436	2.09645e-05	0.000672994
ENSG00000162458.12	FBLIM1	protein_coding	4878.76	-0.215113	0.0506311	-4.24864	2.15071e-05	0.000689116
ENSG00000081189.15	MEF2C	protein_coding	390.769	-0.660359	0.155453	-4.24796	2.15727e-05	0.000689921
ENSG00000125637.15	PSD4	protein_coding	803.103	-0.479598	0.113102	-4.2404	2.2312e-05	0.000712228
ENSG00000261150.2	EPPK1	protein_coding	174.33	-0.972474	0.230284	-4.22293	2.41143e-05	0.000768323
ENSG00000187800.13	PEAR1	protein_coding	401.839	-0.634377	0.1503	-4.22073	2.43516e-05	0.000774435
ENSG00000165175.15	MID1IP1	protein_coding	1858.29	-0.312589	0.0741065	-4.2181	2.46373e-05	0.000780607
ENSG00000165474.6	GJB2	protein_coding	246.776	-0.830963	0.196983	-4.21844	2.45998e-05	0.000780607
ENSG00000156218.12	ADAMTSL3	protein_coding	201.795	-0.941094	0.223251	-4.21541	2.49322e-05	0.000788486
ENSG00000128567.16	PODXL	protein_coding	7236.07	-0.220821	0.0523949	-4.21455	2.50276e-05	0.000788579
ENSG00000103089.8	FA2H	protein_coding	28.6841	-2.64723	0.628086	-4.21476	2.50044e-05	0.000788579
ENSG00000178343.4	SHISA3	protein_coding	5201.22	-0.21227	0.0503975	-4.2119	2.53227e-05	0.000796403
ENSG00000133519.12	ZDHHC8P	transcribed_unprocessed_pseudogene	126.547	1.18272	0.281291	4.20461	2.61528e-05	0.000820995
ENSG00000109475.16	RPL34	protein_coding	3735.63	0.249683	0.0595019	4.19621	2.71413e-05	0.00085046
ENSG00000089159.16	PXN	protein_coding	35144.8	-0.132868	0.0317035	-4.19095	2.77783e-05	0.000867422
ENSG00000151458.11	ANKRD50	protein_coding	3105.54	-0.254412	0.0607057	-4.19091	2.77844e-05	0.000867422
ENSG00000233024.7	RP11-1212A22.4	protein_coding	982.558	0.425995	0.101775	4.18565	2.84355e-05	0.000886128
ENSG00000086758.15	HUWE1	protein_coding	26812.7	-0.141128	0.03376	-4.18032	2.91095e-05	0.000903827
ENSG00000142207.6	URB1	protein_coding	6876.3	-0.201827	0.0482776	-4.18056	2.90791e-05	0.000903827
ENSG00000132424.14	PNISR	protein_coding	3330.42	0.28584	0.068389	4.17962	2.91995e-05	0.000904971
ENSG00000228560.1	RP11-550P17.5	antisense	23.881	-2.96327	0.709126	-4.17877	2.93091e-05	0.00090672
ENSG00000113739.10	STC2	protein_coding	28265.2	0.13799	0.0330541	4.17469	2.98398e-05	0.000921467
ENSG00000181458.10	TMEM45A	protein_coding	1707.17	0.324979	0.0778666	4.17353	2.99912e-05	0.000924468
ENSG00000091436.16	MAP3K20	protein_coding	4947.37	-0.223184	0.0534835	-4.17294	3.0069e-05	0.000925193
ENSG00000135842.16	FAM129A	protein_coding	1882.72	0.316052	0.0758022	4.16942	3.05372e-05	0.000937904
ENSG00000182621.17	PLCB1	protein_coding	4661.72	0.219931	0.0528001	4.16536	3.10866e-05	0.000953061
ENSG00000197006.13	METTL9	protein_coding	6970.14	0.190191	0.0457171	4.16017	3.18015e-05	0.00097323
ENSG00000255248.7	MIR100HG	processed_transcript	4451.94	0.264912	0.0636913	4.15931	3.19207e-05	0.000975127
ENSG00000173209.23	AC016747.2	transcribed_unitary_pseudogene	1119.32	0.387827	0.0934036	4.15216	3.29353e-05	0.00100432
ENSG00000111907.20	TPD52L1	protein_coding	75.7176	-1.46932	0.35408	-4.14968	3.32945e-05	0.00101346
ENSG00000162433.14	AK4	protein_coding	12144.6	0.163376	0.0393813	4.14857	3.34564e-05	0.00101657
ENSG00000116254.17	CHD5	protein_coding	1265.04	0.387122	0.0933844	4.14547	3.39115e-05	0.00102857
ENSG00000184792.15	OSBP2	protein_coding	1733.29	-0.320932	0.0775809	-4.13674	3.52268e-05	0.00106657
ENSG00000117450.13	PRDX1	protein_coding	29216.9	0.148998	0.0361072	4.12655	3.68246e-05	0.00111297
ENSG00000136802.11	LRRC8A	protein_coding	3288.09	-0.243101	0.0589292	-4.12531	3.7023e-05	0.00111698
ENSG00000198743.6	SLC5A3	protein_coding	14966.1	-0.166618	0.0404138	-4.1228	3.74299e-05	0.00112726
ENSG00000111961.17	SASH1	protein_coding	481.88	-0.574986	0.139762	-4.11404	3.88792e-05	0.00116884
ENSG00000198176.12	TFDP1	protein_coding	10803.9	-0.170462	0.0414767	-4.10982	3.95962e-05	0.0011883
ENSG00000065882.15	TBC1D1	protein_coding	1505.44	-0.341004	0.0831157	-4.10276	4.08245e-05	0.00122301
ENSG00000074416.13	MGLL	protein_coding	5165.81	-0.224538	0.054764	-4.1001	4.1298e-05	0.00123503
ENSG00000136155.16	SCEL	protein_coding	366.954	-0.670405	0.163579	-4.09837	4.16076e-05	0.00124211
ENSG00000206432.4	TMEM200C	protein_coding	1920.49	-0.300077	0.0733228	-4.09254	4.26666e-05	0.00127149
ENSG00000005810.17	MYCBP2	protein_coding	6091.19	-0.202517	0.0495686	-4.0856	4.39636e-05	0.00130786
ENSG00000173821.19	RNF213	protein_coding	13352	-0.167346	0.041033	-4.07834	4.53581e-05	0.00134699
ENSG00000231925.11	TAPBP	protein_coding	4223.74	-0.230977	0.0566605	-4.07651	4.57162e-05	0.00135527
ENSG00000114120.11	SLC25A36	protein_coding	3157.03	0.247061	0.0606174	4.07574	4.58684e-05	0.00135742
ENSG00000054179.11	ENTPD2	protein_coding	218.654	0.833635	0.20504	4.06572	4.78839e-05	0.00140972
ENSG00000184486.9	POU3F2	protein_coding	514.217	-0.557053	0.137011	-4.06577	4.78739e-05	0.00140972
ENSG00000134769.21	DTNA	protein_coding	88.4593	-1.34097	0.329788	-4.06615	4.77962e-05	0.00140972
ENSG00000113645.14	WWC1	protein_coding	1267.1	-0.358034	0.0882195	-4.05845	4.94e-05	0.00145185
ENSG00000105971.14	CAV2	protein_coding	2691.15	-0.257001	0.0634272	-4.05191	5.08006e-05	0.00149044
ENSG00000172985.10	SH3RF3	protein_coding	2389.44	-0.270374	0.0667367	-4.05136	5.0921e-05	0.00149141
ENSG00000213240.8	RP11-458D21.5	protein_coding	70.2737	-1.55336	0.383515	-4.05032	5.11483e-05	0.00149549
ENSG00000118596.11	SLC16A7	protein_coding	375.667	-0.639589	0.15811	-4.04521	5.2277e-05	0.00152588
ENSG00000092969.11	TGFB2	protein_coding	2079.26	-0.307141	0.0759647	-4.04321	5.27244e-05	0.00153631
ENSG00000117594.9	HSD11B1	protein_coding	10.3784	6.80697	1.68374	4.04276	5.28255e-05	0.00153663
ENSG00000168785.7	TSPAN5	protein_coding	4538.13	-0.210834	0.052158	-4.04222	5.29467e-05	0.00153753
ENSG00000170454.5	KRT75	protein_coding	586.252	-0.517666	0.128535	-4.02744	5.63869e-05	0.00163465
ENSG00000128609.14	NDUFA5	protein_coding	3233.74	0.249154	0.0619273	4.02334	5.73794e-05	0.00166059
ENSG00000183087.14	GAS6	protein_coding	619.91	-0.506144	0.125924	-4.01942	5.8341e-05	0.00168556
ENSG00000152127.8	MGAT5	protein_coding	7583.64	-0.175239	0.0436467	-4.01495	5.94571e-05	0.0017149
ENSG00000102271.13	KLHL4	protein_coding	942.747	0.418725	0.10434	4.01308	5.99321e-05	0.00172568
ENSG00000134287.9	ARF3	protein_coding	10142	-0.161658	0.0403135	-4.01002	6.07146e-05	0.00174526
ENSG00000163660.11	CCNL1	protein_coding	2621.58	0.282321	0.0704312	4.00846	6.11158e-05	0.00174663
ENSG00000174695.9	TMEM167A	protein_coding	7502.01	0.17713	0.0441917	4.00821	6.11807e-05	0.00174663
ENSG00000197958.12	RPL12	protein_coding	28370	0.147139	0.036709	4.00825	6.11715e-05	0.00174663
ENSG00000102144.14	PGK1	protein_coding	91702.7	0.11933	0.0297794	4.00712	6.14633e-05	0.00174663
ENSG00000139644.12	TMBIM6	protein_coding	16637.1	-0.146781	0.0366145	-4.00883	6.10211e-05	0.00174663
ENSG00000114353.16	GNAI2	protein_coding	15747.9	-0.156016	0.0389291	-4.00769	6.13147e-05	0.00174663
ENSG00000109686.17	SH3D19	protein_coding	3425.33	-0.237357	0.0592346	-4.00706	6.14796e-05	0.00174663
ENSG00000185033.14	SEMA4B	protein_coding	3985.41	-0.227714	0.0568366	-4.00646	6.16358e-05	0.00174816
ENSG00000128050.8	PAICS	protein_coding	30926.7	0.146409	0.0365713	4.00339	6.24413e-05	0.00176807
ENSG00000156650.12	KAT6B	protein_coding	5202.34	-0.203086	0.0507392	-4.00255	6.26621e-05	0.00177137
ENSG00000138777.19	PPA2	protein_coding	3863.36	0.219393	0.0548429	4.00038	6.32407e-05	0.00178477
ENSG00000116459.10	ATP5F1	protein_coding	11080.6	0.17301	0.0432772	3.99771	6.3958e-05	0.00179906
ENSG00000041353.9	RAB27B	protein_coding	1562.59	-0.325956	0.0815337	-3.9978	6.3933e-05	0.00179906
ENSG00000265972.5	TXNIP	protein_coding	8095.04	0.173084	0.0433009	3.99723	6.40883e-05	0.00179975
ENSG00000100442.10	FKBP3	protein_coding	5876.13	0.212609	0.053271	3.99108	6.57729e-05	0.00184099
ENSG00000148303.16	RPL7A	protein_coding	25027.8	0.137	0.0343249	3.99128	6.5717e-05	0.00184099
ENSG00000152223.12	EPG5	protein_coding	1584.81	-0.31785	0.0797567	-3.98525	6.74091e-05	0.0018837
ENSG00000206530.10	CFAP44	protein_coding	717.457	0.470888	0.118393	3.97734	6.96908e-05	0.00194427
ENSG00000113657.12	DPYSL3	protein_coding	5118.18	-0.196938	0.0495477	-3.97471	7.04637e-05	0.00196262
ENSG00000154529.14	CNTNAP3B	protein_coding	1476.15	0.360246	0.0906929	3.97215	7.12262e-05	0.00198062
ENSG00000166130.14	IKBIP	protein_coding	2160.48	0.278756	0.0701983	3.97097	7.15791e-05	0.00198719
ENSG00000272620.1	AFAP1-AS1	antisense	128.186	-1.10117	0.277562	-3.96729	7.26934e-05	0.00201485
ENSG00000107404.19	DVL1	protein_coding	12607.7	-0.199897	0.0504569	-3.96173	7.44076e-05	0.00205901
ENSG00000111335.12	OAS2	protein_coding	489.282	-0.554187	0.139924	-3.96062	7.47566e-05	0.00206532
ENSG00000170113.15	NIPA1	protein_coding	8455.37	0.167359	0.0422872	3.95767	7.56847e-05	0.00208758
ENSG00000129682.15	FGF13	protein_coding	48.9848	-1.80776	0.45694	-3.95622	7.61445e-05	0.00209686
ENSG00000122862.4	SRGN	protein_coding	4843.72	-0.206538	0.052244	-3.95334	7.70683e-05	0.00211888
ENSG00000067182.7	TNFRSF1A	protein_coding	5123.79	0.195945	0.0496236	3.94863	7.86012e-05	0.00215754
ENSG00000145545.11	SRD5A1	protein_coding	1772.19	0.31068	0.0787114	3.94707	7.91135e-05	0.00216812
ENSG00000107954.10	NEURL1	protein_coding	878.025	-0.423733	0.107448	-3.94359	8.02698e-05	0.00219627
ENSG00000121807.5	CCR2	protein_coding	15.5685	4.89376	1.24108	3.94314	8.0423e-05	0.00219694
ENSG00000135744.7	AGT	protein_coding	34.5231	2.22512	0.565119	3.93743	8.23578e-05	0.00224619
ENSG00000162522.10	KIAA1522	protein_coding	3949.18	-0.224234	0.0569912	-3.93453	8.3358e-05	0.00226984
ENSG00000162722.8	TRIM58	protein_coding	1591.07	-0.317086	0.0806209	-3.93305	8.3874e-05	0.00228025
ENSG00000104044.15	OCA2	protein_coding	19.7717	3.14452	0.79986	3.93133	8.44768e-05	0.00229298
ENSG00000138675.16	FGF5	protein_coding	80.7219	-1.3711	0.348807	-3.93083	8.46547e-05	0.00229416
ENSG00000173660.11	UQCRH	protein_coding	8121.93	0.221797	0.0564615	3.92828	8.55552e-05	0.00231488
ENSG00000153140.8	CETN3	protein_coding	1514.7	0.347783	0.088617	3.92457	8.68858e-05	0.00234716
ENSG00000182809.10	CRIP2	protein_coding	3543.49	-0.234038	0.059648	-3.92366	8.72155e-05	0.00235234
ENSG00000145242.13	EPHA5	protein_coding	236.006	-0.767155	0.195668	-3.92069	8.82961e-05	0.00237772
ENSG00000137955.15	RABGGTB	protein_coding	3033.61	0.244953	0.0625185	3.91809	8.92551e-05	0.00239975
ENSG00000151835.15	SACS	protein_coding	8092.56	-0.176406	0.0450391	-3.91673	8.97564e-05	0.00240943
ENSG00000154640.14	BTG3	protein_coding	822.523	0.425294	0.108698	3.91261	9.13027e-05	0.00244324
ENSG00000101210.11	EEF1A2	protein_coding	33860.7	0.13253	0.0338714	3.91274	9.12557e-05	0.00244324
ENSG00000074527.11	NTN4	protein_coding	1846.05	-0.304688	0.0778955	-3.9115	9.17255e-05	0.00244687
ENSG00000173083.14	HPSE	protein_coding	104.951	-1.2003	0.306862	-3.91152	9.17176e-05	0.00244687
ENSG00000184838.14	PRR16	protein_coding	123.054	-1.06084	0.271573	-3.90627	9.37312e-05	0.00249647
ENSG00000068650.18	ATP11A	protein_coding	4757.85	-0.212723	0.0544877	-3.90406	9.4592e-05	0.00251547
ENSG00000196683.10	TOMM7	protein_coding	3141.85	0.308727	0.0790938	3.9033	9.48911e-05	0.00251949
ENSG00000116871.15	MAP7D1	protein_coding	5958.21	-0.199976	0.0513248	-3.89628	9.76817e-05	0.00258955
ENSG00000155324.9	GRAMD3	protein_coding	2673.52	0.2481	0.0637264	3.8932	9.89292e-05	0.00261855
ENSG00000057019.15	DCBLD2	protein_coding	23621.3	-0.151947	0.0390343	-3.89265	9.91542e-05	0.00262044
ENSG00000176903.4	PNMA1	protein_coding	19610.6	0.136199	0.0350056	3.89078	9.99223e-05	0.0026361
ENSG00000182199.10	SHMT2	protein_coding	7963.2	-0.167764	0.0431218	-3.89046	0.000100056	0.0026361
ENSG00000104517.12	UBR5	protein_coding	14356.6	-0.144072	0.0370389	-3.88975	0.000100347	0.0026397
ENSG00000116991.10	SIPA1L2	protein_coding	3780.4	-0.220686	0.0569483	-3.8752	0.000106536	0.00279818
ENSG00000126562.16	WNK4	protein_coding	2609.61	-0.260698	0.0673045	-3.87342	0.000107321	0.00281195
ENSG00000013297.11	CLDN11	protein_coding	1980.14	-0.281427	0.0726591	-3.87326	0.000107391	0.00281195
ENSG00000109971.13	HSPA8	protein_coding	111454	0.150977	0.0390107	3.87015	0.000108768	0.00284125
ENSG00000039139.9	DNAH5	protein_coding	416.845	-0.577286	0.14917	-3.86998	0.000108843	0.00284125
ENSG00000111716.12	LDHB	protein_coding	18659.9	0.1799	0.0465103	3.86796	0.000109751	0.00285432
ENSG00000148660.20	CAMK2G	protein_coding	7368.24	-0.175241	0.0453076	-3.8678	0.000109824	0.00285432
ENSG00000185359.12	HGS	protein_coding	5349.86	-0.195847	0.050636	-3.86775	0.000109846	0.00285432
ENSG00000253368.3	TRNP1	protein_coding	2600.16	-0.25145	0.0650446	-3.86581	0.000110721	0.00287267
ENSG00000071051.13	NCK2	protein_coding	2395.36	-0.269143	0.0696483	-3.86432	0.000111401	0.00288594
ENSG00000155893.12	PXYLP1	protein_coding	455.301	0.549962	0.142387	3.86246	0.000112252	0.00290357
ENSG00000138443.15	ABI2	protein_coding	4771.16	-0.211636	0.054848	-3.85859	0.000114041	0.00294537
ENSG00000166391.14	MOGAT2	protein_coding	9.23305	6.63657	1.72033	3.85773	0.000114445	0.00295133
ENSG00000064042.17	LIMCH1	protein_coding	3187.43	0.230392	0.0597641	3.85502	0.000115718	0.00297966
ENSG00000134001.12	EIF2S1	protein_coding	25031.1	0.145397	0.0377381	3.8528	0.000116774	0.0030023
ENSG00000188042.7	ARL4C	protein_coding	643.894	-0.46136	0.119793	-3.85132	0.000117482	0.00301596
ENSG00000139921.12	TMX1	protein_coding	10626.6	0.155638	0.0404278	3.84976	0.000118232	0.00303065
ENSG00000162892.15	IL24	protein_coding	27.3837	-2.47193	0.642194	-3.84919	0.000118509	0.00303319
ENSG00000008282.8	SYPL1	protein_coding	12034.3	0.162028	0.0421037	3.84832	0.000118932	0.00303945
ENSG00000164171.10	ITGA2	protein_coding	13402.9	-0.157504	0.0409411	-3.84709	0.000119531	0.00305019
ENSG00000092929.11	UNC13D	protein_coding	430.094	-0.562324	0.146227	-3.84556	0.000120279	0.00306468
ENSG00000187678.9	SPRY4	protein_coding	6838.68	0.183777	0.0478113	3.8438	0.000121144	0.00308212
ENSG00000165997.4	ARL5B	protein_coding	2462.94	0.264047	0.0687701	3.83955	0.000123258	0.00312059
ENSG00000172172.7	MRPL13	protein_coding	3581.38	0.231579	0.0603054	3.84011	0.000122981	0.00312059
ENSG00000112306.7	RPS12	protein_coding	13765.1	0.175055	0.0455957	3.83929	0.000123388	0.00312059
ENSG00000203727.3	SAMD5	protein_coding	116.469	-1.08475	0.282496	-3.83987	0.000123101	0.00312059
ENSG00000165556.9	CDX2	protein_coding	44.9149	-1.77584	0.462662	-3.8383	0.000123889	0.00312861
ENSG00000126709.14	IFI6	protein_coding	485.191	0.53291	0.139027	3.83313	0.000126525	0.00319045
ENSG00000128641.18	MYO1B	protein_coding	12533.5	0.157216	0.0410334	3.83143	0.000127403	0.00320784
ENSG00000170412.16	GPRC5C	protein_coding	15326.4	0.156701	0.0409551	3.82617	0.000130154	0.00327228
ENSG00000238266.1	RP11-799O21.1	lincRNA	62.7091	-1.47463	0.385546	-3.82479	0.000130881	0.00328572
ENSG00000197111.15	PCBP2	protein_coding	16464	-0.14886	0.038927	-3.82407	0.000131266	0.00329052
ENSG00000241544.1	RP11-6F2.5	lincRNA	23.4685	2.74998	0.719399	3.82261	0.000132045	0.0033052
ENSG00000186834.3	HEXIM1	protein_coding	4982.79	-0.191187	0.0500575	-3.81935	0.000133802	0.00334426
ENSG00000138271.5	GPR87	protein_coding	152.891	-0.941516	0.246766	-3.81542	0.000135952	0.00339304
ENSG00000151136.14	BTBD11	protein_coding	323.83	-0.636592	0.167002	-3.81189	0.000137911	0.00343688
ENSG00000164116.16	GUCY1A3	protein_coding	418.998	-0.57322	0.150402	-3.81127	0.000138256	0.00344045
ENSG00000182774.11	RPS17	protein_coding	17454	0.191317	0.0502088	3.81042	0.000138729	0.00344719
ENSG00000065989.15	PDE4A	protein_coding	761.271	-0.425855	0.11195	-3.80397	0.000142397	0.0035332
ENSG00000166575.16	TMEM135	protein_coding	2062.1	0.284402	0.0748883	3.79768	0.000146055	0.00361362
ENSG00000146731.10	CCT6A	protein_coding	29518.6	0.140866	0.0370928	3.79767	0.000146063	0.00361362
ENSG00000164236.11	ANKRD33B	protein_coding	1599.1	-0.298604	0.0787467	-3.79196	0.000149464	0.00369242
ENSG00000145741.15	BTF3	protein_coding	12838.4	0.179968	0.0474856	3.78996	0.000150672	0.00371688
ENSG00000114554.11	PLXNA1	protein_coding	6486.35	-0.191562	0.0505667	-3.78831	0.000151674	0.00373618
ENSG00000054598.7	FOXC1	protein_coding	1795.4	-0.293837	0.077599	-3.78661	0.000152715	0.00375576
ENSG00000215695.1	RSC1A1	protein_coding	8.59956	-6.55964	1.73247	-3.7863	0.00015291	0.00375576
ENSG00000105519.15	CAPS	protein_coding	413.151	-0.58182	0.153767	-3.78377	0.000154471	0.00378865
ENSG00000114812.12	VIPR1	protein_coding	99.8556	-1.15131	0.304337	-3.78303	0.000154932	0.0037945
ENSG00000204370.10	SDHD	protein_coding	6991.32	0.17307	0.0457853	3.78003	0.000156811	0.00382403
ENSG00000176340.3	COX8A	protein_coding	7828.11	0.169261	0.0447706	3.78062	0.000156436	0.00382403
ENSG00000163975.11	MELTF	protein_coding	998.038	-0.3769	0.099707	-3.78008	0.000156778	0.00382403
ENSG00000010404.17	IDS	protein_coding	8216.41	-0.167312	0.04427	-3.77936	0.00015723	0.00382878
ENSG00000164587.12	RPS14	protein_coding	27790.1	0.132439	0.0350984	3.77336	0.000161066	0.00391659
ENSG00000124207.16	CSE1L	protein_coding	46942.1	0.146218	0.0387692	3.77151	0.000162264	0.00393451
ENSG00000088387.18	DOCK9	protein_coding	1498.14	-0.309	0.0819298	-3.77152	0.000162254	0.00393451
ENSG00000166200.14	COPS2	protein_coding	5857.77	0.181062	0.0480445	3.76863	0.000164147	0.0039745
ENSG00000180229.12	HERC2P3	transcribed_unprocessed_pseudogene	2270.14	0.258442	0.0686309	3.76568	0.000166098	0.00401604
ENSG00000204839.8	MROH6	protein_coding	329.305	-0.645156	0.171352	-3.7651	0.00016648	0.00401958
ENSG00000130545.15	CRB3	protein_coding	21.6605	-2.80791	0.746257	-3.76266	0.000168115	0.00405331
ENSG00000168079.16	SCARA5	protein_coding	1489.14	0.308328	0.0819775	3.76113	0.00016915	0.00407183
ENSG00000188706.12	ZDHHC9	protein_coding	4987.43	0.188744	0.0501916	3.76047	0.000169595	0.00407183
ENSG00000072210.18	ALDH3A2	protein_coding	16524.9	0.14007	0.037248	3.76046	0.0001696	0.00407183
ENSG00000152377.13	SPOCK1	protein_coding	2231.84	-0.256546	0.0682316	-3.75993	0.00016996	0.00407473
ENSG00000069702.10	TGFBR3	protein_coding	827.445	0.400832	0.106823	3.75229	0.000175225	0.00419238
ENSG00000057294.14	PKP2	protein_coding	540.888	-0.492301	0.131207	-3.7521	0.000175359	0.00419238
ENSG00000133110.14	POSTN	protein_coding	8.48774	-6.54305	1.74696	-3.7454	0.000180107	0.00429987
ENSG00000103184.11	SEC14L5	protein_coding	27.3926	2.33524	0.624377	3.74012	0.000183931	0.00438503
ENSG00000100196.10	KDELR3	protein_coding	3100.58	0.224385	0.0600159	3.73876	0.000184932	0.00439658
ENSG00000135249.7	RINT1	protein_coding	4190.32	0.205134	0.0548619	3.7391	0.000184678	0.00439658
ENSG00000065357.19	DGKA	protein_coding	673.575	-0.438108	0.117223	-3.73738	0.000185951	0.00441466
ENSG00000102699.5	PARP4	protein_coding	8774.2	-0.16998	0.0454861	-3.73697	0.000186248	0.00441554
ENSG00000185896.10	LAMP1	protein_coding	11735.9	-0.145301	0.0389059	-3.73469	0.000187947	0.00444964
ENSG00000140905.10	GCSH	protein_coding	2729.05	0.247786	0.0663751	3.73312	0.000189125	0.00447132
ENSG00000153253.16	SCN3A	protein_coding	111.233	-1.08985	0.292446	-3.72669	0.000194009	0.00458044
ENSG00000111817.17	DSE	protein_coding	128.74	-1.00037	0.268589	-3.72454	0.000195668	0.00461322
ENSG00000197256.10	KANK2	protein_coding	6585.39	-0.171882	0.046219	-3.71886	0.000200122	0.00471172
ENSG00000112033.13	PPARD	protein_coding	3147.23	-0.221346	0.0595272	-3.7184	0.000200486	0.00471377
ENSG00000173227.13	SYT12	protein_coding	1167.14	0.352868	0.0949428	3.71664	0.00020189	0.00473372
ENSG00000137745.11	MMP13	protein_coding	214.324	-0.774191	0.208295	-3.7168	0.000201759	0.00473372
ENSG00000133687.15	TMTC1	protein_coding	1849.24	0.28554	0.0768596	3.71508	0.000203137	0.00475511
ENSG00000083307.11	GRHL2	protein_coding	74.6091	-1.32231	0.355958	-3.71481	0.00020336	0.00475511
ENSG00000106031.7	HOXA13	protein_coding	3167.59	0.242027	0.0651946	3.71238	0.000205323	0.00479443
ENSG00000164284.14	GRPEL2	protein_coding	4076.4	0.199881	0.0539184	3.70711	0.000209641	0.00488856
ENSG00000110841.13	PPFIBP1	protein_coding	2793.95	-0.230677	0.0622695	-3.70449	0.000211812	0.00493245
ENSG00000163884.3	KLF15	protein_coding	8.15546	6.45921	1.74443	3.70275	0.000213274	0.00495972
ENSG00000143153.12	ATP1B1	protein_coding	2372.46	-0.247037	0.0667839	-3.69905	0.000216404	0.00502564
ENSG00000047365.11	ARAP2	protein_coding	68.1707	-1.418	0.383604	-3.69654	0.000218562	0.00506884
ENSG00000169607.12	CKAP2L	protein_coding	2965.36	-0.230118	0.0622747	-3.69521	0.000219706	0.00508847
ENSG00000185624.14	P4HB	protein_coding	73874.2	0.112262	0.030391	3.69393	0.000220816	0.00510723
ENSG00000064270.12	ATP2C2	protein_coding	20.7863	-2.73199	0.740407	-3.68984	0.000224391	0.00518288
ENSG00000134824.13	FADS2	protein_coding	27954.6	0.121446	0.0329189	3.68925	0.00022492	0.00518808
ENSG00000266094.7	RASSF5	protein_coding	649.611	-0.439955	0.119373	-3.68554	0.000228217	0.005257
ENSG00000078668.13	VDAC3	protein_coding	5727.97	0.211674	0.0574467	3.68471	0.000228965	0.00526713
ENSG00000196141.13	SPATS2L	protein_coding	11591	0.154889	0.0420449	3.68388	0.000229708	0.00527709
ENSG00000100697.14	DICER1	protein_coding	4781.64	0.204598	0.0555532	3.68292	0.000230581	0.00529001
ENSG00000141738.13	GRB7	protein_coding	147.6	-0.94678	0.257128	-3.68213	0.000231291	0.00529918
ENSG00000133983.14	COX16	protein_coding	6883.51	0.178985	0.0486224	3.68113	0.000232204	0.00530583
ENSG00000152527.13	PLEKHH2	protein_coding	584.811	-0.480521	0.130527	-3.6814	0.000231955	0.00530583
ENSG00000131378.13	RFTN1	protein_coding	142.957	-0.95371	0.259159	-3.68001	0.000233221	0.00532194
ENSG00000015413.9	DPEP1	protein_coding	15.0405	5.87841	1.60213	3.66912	0.000243386	0.00554646
ENSG00000169439.11	SDC2	protein_coding	1827.76	0.272412	0.0743427	3.66427	0.000248046	0.00563759
ENSG00000118855.18	MFSD1	protein_coding	4163.9	0.196207	0.0535421	3.66453	0.000247793	0.00563759
ENSG00000244398.1	RP11-466H18.1	processed_pseudogene	560.283	0.500933	0.136734	3.66356	0.00024873	0.00564088
ENSG00000106080.10	FKBP14	protein_coding	3401	0.211183	0.0576461	3.66344	0.000248853	0.00564088
ENSG00000165406.15	MARCH8	protein_coding	1722.07	-0.278622	0.0761669	-3.65804	0.00025415	0.00575331
ENSG00000125285.5	SOX21	protein_coding	151.894	-0.944247	0.258163	-3.65756	0.000254626	0.00575644
ENSG00000058063.15	ATP11B	protein_coding	4062.55	0.196283	0.0538223	3.64688	0.000265443	0.00599303
ENSG00000054654.16	SYNE2	protein_coding	1489.8	-0.30878	0.0847343	-3.6441	0.000268332	0.00605026
ENSG00000163565.18	IFI16	protein_coding	163.466	-0.879886	0.241818	-3.63862	0.000274102	0.00617218
ENSG00000172731.13	LRRC20	protein_coding	2688.83	-0.230169	0.0633714	-3.63207	0.00028116	0.00632275
ENSG00000163661.3	PTX3	protein_coding	5364.26	-0.20495	0.0564754	-3.62902	0.000284499	0.00638943
ENSG00000184922.13	FMNL1	protein_coding	607.849	-0.449667	0.124067	-3.62439	0.00028964	0.00649633
ENSG00000110723.11	EXPH5	protein_coding	233.301	-0.740704	0.204404	-3.62372	0.000290395	0.00650469
ENSG00000092421.16	SEMA6A	protein_coding	89.7223	1.16049	0.320315	3.62295	0.000291264	0.00651561
ENSG00000182240.15	BACE2	protein_coding	8090.51	-0.155739	0.0430188	-3.62026	0.000294303	0.00657496
ENSG00000142937.11	RPS8	protein_coding	33002.1	0.157158	0.043427	3.6189	0.000295855	0.00660098
ENSG00000174640.12	SLCO2A1	protein_coding	16.9085	3.09841	0.856404	3.61793	0.000296974	0.00661728
ENSG00000257315.2	ZBED6	protein_coding	516.901	-0.508085	0.140465	-3.61717	0.000297839	0.00662788
ENSG00000070540.12	WIPI1	protein_coding	1875.17	0.268169	0.0741555	3.61631	0.000298837	0.00664142
ENSG00000100201.20	DDX17	protein_coding	11672.3	0.144627	0.0400064	3.61511	0.000300225	0.00666359
ENSG00000135245.9	HILPDA	protein_coding	1024.89	0.353498	0.097895	3.61099	0.000305033	0.00676149
ENSG00000131374.14	TBC1D5	protein_coding	3766.5	-0.208289	0.0576955	-3.61014	0.000306033	0.00677485
ENSG00000123352.17	SPATS2	protein_coding	2437.89	-0.245654	0.0680639	-3.60916	0.000307193	0.00679171
ENSG00000197102.11	DYNC1H1	protein_coding	62871.5	-0.110975	0.0307518	-3.60871	0.00030772	0.00679456
ENSG00000170004.16	CHD3	protein_coding	9655.92	-0.147282	0.0408893	-3.60197	0.00031582	0.00696439
ENSG00000187109.13	NAP1L1	protein_coding	20345.8	0.126149	0.0350305	3.60113	0.00031684	0.00697784
ENSG00000076201.14	PTPN23	protein_coding	3161.47	-0.218312	0.0606918	-3.59707	0.000321827	0.00707854
ENSG00000185787.14	MORF4L1	protein_coding	9783.26	0.154442	0.0429682	3.59432	0.000325238	0.00714434
ENSG00000188529.14	SRSF10	protein_coding	6075.49	0.176279	0.0490587	3.59322	0.000326613	0.00716532
ENSG00000062716.12	VMP1	protein_coding	8983.61	0.161379	0.044942	3.59084	0.000329619	0.00722197
ENSG00000174358.15	SLC6A19	protein_coding	7.61666	6.3616	1.77231	3.58944	0.000331385	0.00725134
ENSG00000183023.18	SLC8A1	protein_coding	111.573	-1.0374	0.289162	-3.58761	0.000333728	0.00729324
ENSG00000055044.10	NOP58	protein_coding	5151.21	0.187523	0.0523182	3.58429	0.000338002	0.00737719
ENSG00000105141.5	CASP14	protein_coding	13.8408	-5.77549	1.61254	-3.58161	0.000341486	0.00744369
ENSG00000180287.16	PLD5	protein_coding	14.2209	3.71915	1.03956	3.57762	0.000346733	0.00754842
ENSG00000144959.9	NCEH1	protein_coding	3461.68	-0.208466	0.0583922	-3.57011	0.000356835	0.00775843
ENSG00000117528.11	ABCD3	protein_coding	3696.47	0.201671	0.0565766	3.56457	0.000364448	0.00791386
ENSG00000105819.13	PMPCB	protein_coding	4632.39	0.193366	0.0543072	3.5606	0.000370009	0.00802439
ENSG00000204580.13	DDR1	protein_coding	4584.32	-0.20415	0.0574315	-3.55466	0.000378468	0.00819741
ENSG00000279561.2	RP11-4L24.4	TEC	212.11	0.733407	0.206352	3.55416	0.000379189	0.0082026
ENSG00000166073.10	GPR176	protein_coding	2731.76	-0.224092	0.0630748	-3.5528	0.00038115	0.00823457
ENSG00000234741.7	GAS5	processed_transcript	1991.87	0.261056	0.0735171	3.55095	0.000383843	0.00826134
ENSG00000066117.14	SMARCD1	protein_coding	4701.46	-0.181994	0.0512436	-3.55155	0.000382974	0.00826134
ENSG00000276116.2	FUT8-AS1	antisense	175.475	-0.815468	0.229631	-3.55121	0.000383458	0.00826134
ENSG00000128951.13	DUT	protein_coding	3066.84	0.213869	0.060265	3.54881	0.000386981	0.00831069
ENSG00000204469.12	PRRC2A	protein_coding	23134.5	-0.120026	0.0338224	-3.54872	0.000387111	0.00831069
ENSG00000086061.15	DNAJA1	protein_coding	11451.5	0.178132	0.050203	3.54824	0.000387813	0.0083153
ENSG00000171314.8	PGAM1	protein_coding	52684.4	0.108519	0.030606	3.54569	0.000391593	0.00838575
ENSG00000170421.12	KRT8	protein_coding	12369.6	-0.143311	0.0404221	-3.54536	0.000392083	0.00838575
ENSG00000142552.7	RCN3	protein_coding	4315.43	0.212019	0.0598206	3.54425	0.000393725	0.0083998
ENSG00000183856.10	IQGAP3	protein_coding	2890	-0.225534	0.0636298	-3.54448	0.000393392	0.0083998
ENSG00000117523.16	PRRC2C	protein_coding	30289	-0.141981	0.040091	-3.54147	0.000397899	0.00847824
ENSG00000110435.11	PDHX	protein_coding	2683.85	0.225631	0.0637304	3.5404	0.000399527	0.00850229
ENSG00000136982.5	DSCC1	protein_coding	2498.4	0.235138	0.0664632	3.53787	0.000403374	0.00856548
ENSG00000125731.12	SH2D3A	protein_coding	704.277	-0.406493	0.1149	-3.53778	0.000403501	0.00856548
ENSG00000159784.17	FAM131B	protein_coding	1734.3	-0.271962	0.0768986	-3.53663	0.000405265	0.00859222
ENSG00000215218.3	UBE2QL1	protein_coding	856.182	0.377	0.10663	3.53561	0.00040684	0.0086149
ENSG00000075239.13	ACAT1	protein_coding	7062.89	0.197922	0.0559883	3.53505	0.0004077	0.00861581
ENSG00000122786.19	CALD1	protein_coding	4431.66	-0.186697	0.0528151	-3.53492	0.000407894	0.00861581
ENSG00000163728.10	TTC14	protein_coding	2806.5	0.223736	0.0633163	3.53362	0.000409909	0.00864767
ENSG00000138814.16	PPP3CA	protein_coding	4268.01	0.186631	0.0528505	3.5313	0.000413518	0.00871301
ENSG00000100647.7	SUSD6	protein_coding	1714.93	0.272975	0.077326	3.53019	0.000415266	0.00873903
ENSG00000115380.19	EFEMP1	protein_coding	299.692	-0.634436	0.179911	-3.52638	0.000421276	0.00885459
ENSG00000135318.11	NT5E	protein_coding	5098.15	0.175313	0.0497538	3.52362	0.000425693	0.00893606
ENSG00000180921.6	FAM83H	protein_coding	5085.29	-0.197897	0.0561679	-3.5233	0.000426201	0.00893606
ENSG00000129084.17	PSMA1	protein_coding	7547.92	0.157626	0.0447494	3.52242	0.000427627	0.00895495
ENSG00000135862.5	LAMC1	protein_coding	10320.9	0.149321	0.0424219	3.5199	0.000431709	0.00902934
ENSG00000117152.13	RGS4	protein_coding	163.341	-0.871894	0.247734	-3.51948	0.000432393	0.00903257
ENSG00000156411.9	C14orf2	protein_coding	2534.32	0.231578	0.0658072	3.51903	0.00043312	0.00903668
ENSG00000106804.7	C5	protein_coding	526.668	-0.476283	0.135453	-3.51623	0.00043772	0.00912148
ENSG00000166426.7	CRABP1	protein_coding	3177.15	0.212893	0.0605693	3.51487	0.000439971	0.00915612
ENSG00000089063.14	TMEM230	protein_coding	7190.09	0.161914	0.0460693	3.51458	0.000440456	0.00915612
ENSG00000108821.13	COL1A1	protein_coding	1200.97	-0.316964	0.0902345	-3.51266	0.000443638	0.00919983
ENSG00000137573.13	SULF1	protein_coding	32.7142	-1.95334	0.556041	-3.51294	0.00044317	0.00919983
ENSG00000172819.16	RARG	protein_coding	1981.17	-0.25326	0.072109	-3.51218	0.000444441	0.00920527
ENSG00000130402.11	ACTN4	protein_coding	34703	-0.116681	0.0332483	-3.50938	0.000449147	0.00929145
ENSG00000130255.12	RPL36	protein_coding	14884.1	0.150764	0.0429972	3.50637	0.00045427	0.00938604
ENSG00000151929.9	BAG3	protein_coding	3426.77	-0.203608	0.058091	-3.50498	0.000456635	0.00942349
ENSG00000104408.9	EIF3E	protein_coding	20571	0.140874	0.0402051	3.50388	0.000458527	0.00943967
ENSG00000151474.21	FRMD4A	protein_coding	693.976	-0.41322	0.117931	-3.5039	0.000458492	0.00943967
ENSG00000072110.13	ACTN1	protein_coding	72961.9	-0.105059	0.030006	-3.50127	0.000463038	0.00952104
ENSG00000147408.14	CSGALNACT1	protein_coding	568.459	0.458778	0.131094	3.4996	0.000465959	0.00956957
ENSG00000284946.1	AC068831.18	protein_coding	679.955	0.43268	0.123715	3.49739	0.000469839	0.00963764
ENSG00000173418.11	NAA20	protein_coding	5758.22	0.172997	0.0495122	3.49403	0.000475795	0.00974809
ENSG00000083444.16	PLOD1	protein_coding	20861.4	0.120998	0.0346673	3.49027	0.000482524	0.00987408
ENSG00000172296.12	SPTLC3	protein_coding	4121.99	0.194231	0.0556652	3.48926	0.000484353	0.00989962
ENSG00000174243.9	DDX23	protein_coding	5858.51	-0.165661	0.0474937	-3.48807	0.000486523	0.00993207
ENSG00000087085.14	ACHE	protein_coding	1093.43	0.336322	0.0965286	3.48417	0.000493662	0.0100657
ENSG00000136810.12	TXN	protein_coding	6017.54	0.194653	0.0558882	3.4829	0.000496022	0.0101018
ENSG00000132481.6	TRIM47	protein_coding	2963.42	-0.220876	0.0634233	-3.48256	0.000496643	0.0101023
ENSG00000171928.13	TVP23B	protein_coding	1958.1	0.260771	0.0750262	3.47573	0.000509459	0.0103507
ENSG00000245910.8	SNHG6	processed_transcript	1991.5	0.252126	0.0725789	3.47382	0.000513115	0.0104089
ENSG00000157557.11	ETS2	protein_coding	2293.58	-0.237265	0.0683056	-3.47359	0.000513545	0.0104089
ENSG00000154997.8	SEPT14	protein_coding	6.96692	6.23077	1.79467	3.47183	0.000516931	0.0104651
ENSG00000113916.17	BCL6	protein_coding	1800.86	0.259248	0.0747204	3.46957	0.000521294	0.010529
ENSG00000140988.15	RPS2	protein_coding	86952.7	0.118386	0.0341213	3.46955	0.000521325	0.010529
ENSG00000182165.17	TP53TG1	lincRNA	335.366	0.582069	0.167866	3.46746	0.00052541	0.010599
ENSG00000153132.12	CLGN	protein_coding	2136.12	0.279062	0.0805204	3.46573	0.000528793	0.0106546
ENSG00000147852.15	VLDLR	protein_coding	91.1575	1.09888	0.317173	3.46461	0.000530996	0.0106612
ENSG00000079257.7	LXN	protein_coding	5898.46	0.191506	0.0552737	3.46469	0.000530843	0.0106612
ENSG00000072415.8	MPP5	protein_coding	13237.9	0.136648	0.0394347	3.46518	0.000529883	0.0106612
ENSG00000278615.4	C11orf98	protein_coding	3069.97	0.241242	0.0696931	3.46149	0.000537199	0.010773
ENSG00000271447.5	MMP28	protein_coding	274.56	0.65138	0.188277	3.45968	0.00054081	0.0108327
ENSG00000172818.9	OVOL1	protein_coding	6.82783	-6.22683	1.80036	-3.45866	0.000542878	0.0108614
ENSG00000154229.11	PRKCA	protein_coding	5948.57	-0.168028	0.0486515	-3.45371	0.000552925	0.0110494
ENSG00000166828.2	SCNN1G	protein_coding	208.186	0.786826	0.227963	3.45155	0.00055738	0.0111254
ENSG00000159842.14	ABR	protein_coding	4408.51	-0.184184	0.0533745	-3.45078	0.00055896	0.0111439
ENSG00000163516.13	ANKZF1	protein_coding	1945.42	0.250159	0.0724999	3.45047	0.000559618	0.011144
ENSG00000116701.14	NCF2	protein_coding	174.1	-0.792053	0.229576	-3.45007	0.000560433	0.0111472
ENSG00000058091.16	CDK14	protein_coding	2039.4	-0.259591	0.0752858	-3.44808	0.000564595	0.0112169
ENSG00000174307.6	PHLDA3	protein_coding	1605.24	-0.321234	0.0932469	-3.44498	0.000571107	0.0113331
ENSG00000171848.14	RRM2	protein_coding	17890.7	0.125219	0.0363977	3.4403	0.000581078	0.0115175
ENSG00000167522.15	ANKRD11	protein_coding	9553.51	-0.14805	0.0432426	-3.42372	0.000617707	0.0122293
ENSG00000148773.13	MKI67	protein_coding	18107.4	-0.129855	0.0379319	-3.42336	0.000618512	0.012231
ENSG00000130413.15	STK33	protein_coding	83.0939	1.14342	0.334101	3.42239	0.000620735	0.0122324
ENSG00000167815.11	PRDX2	protein_coding	15903.3	0.146848	0.0429042	3.4227	0.000620027	0.0122324
ENSG00000101189.6	MRGBP	protein_coding	13171.9	0.137829	0.0402668	3.42289	0.000619586	0.0122324
ENSG00000000971.15	CFH	protein_coding	36.1475	-1.77147	0.517814	-3.42105	0.000623809	0.0122788
ENSG00000143786.7	CNIH3	protein_coding	157.062	-0.821186	0.240104	-3.42013	0.000625915	0.0123061
ENSG00000119139.18	TJP2	protein_coding	1480.7	-0.28071	0.0821663	-3.41637	0.000634626	0.0124629
ENSG00000072042.12	RDH11	protein_coding	14741.2	0.126355	0.0370298	3.41226	0.000644273	0.0126378
ENSG00000099204.18	ABLIM1	protein_coding	2627.19	-0.233985	0.0685855	-3.41158	0.000645868	0.0126546
ENSG00000239264.8	TXNDC5	protein_coding	23721.8	0.115897	0.0340279	3.40594	0.000659367	0.0129042
ENSG00000204128.5	C2orf72	protein_coding	312.603	0.588864	0.172988	3.40408	0.000663875	0.0129627
ENSG00000186472.19	PCLO	protein_coding	1401.5	-0.286541	0.0841712	-3.40427	0.000663416	0.0129627
ENSG00000137699.16	TRIM29	protein_coding	35.9325	1.79809	0.528509	3.40218	0.000668497	0.0130231
ENSG00000260725.1	AC005307.1	lincRNA	51.5598	1.4888	0.437591	3.40226	0.000668305	0.0130231
ENSG00000164104.11	HMGB2	protein_coding	5066.11	0.185293	0.0545079	3.39938	0.000675393	0.0131424
ENSG00000197879.15	MYO1C	protein_coding	11475.9	-0.133791	0.0393967	-3.396	0.000683794	0.0132907
ENSG00000171451.13	DSEL	protein_coding	1344.68	-0.291208	0.0858289	-3.39289	0.000691597	0.0134271
ENSG00000112297.14	AIM1	protein_coding	2194.7	-0.244868	0.072342	-3.38487	0.000712128	0.0138099
ENSG00000198034.10	RPS4X	protein_coding	38434.5	0.144379	0.0426979	3.3814	0.00072118	0.0139537
ENSG00000123066.7	MED13L	protein_coding	4547.52	-0.182245	0.0538926	-3.38163	0.000720575	0.0139537
ENSG00000161970.13	RPL26	protein_coding	13469.5	0.160174	0.0473896	3.37994	0.000725011	0.0140119
ENSG00000134686.18	PHC2	protein_coding	10612.6	-0.137793	0.0408032	-3.37701	0.000732772	0.0141459
ENSG00000151135.9	TMEM263	protein_coding	4927.06	0.171896	0.0509307	3.37509	0.000737907	0.0142289
ENSG00000100519.11	PSMC6	protein_coding	5595.21	0.168808	0.0500224	3.37465	0.000739083	0.0142355
ENSG00000167785.8	ZNF558	protein_coding	2487.77	0.220339	0.0653529	3.37153	0.000747529	0.0143819
ENSG00000153933.9	DGKE	protein_coding	1987.26	0.244589	0.0725654	3.37059	0.000750065	0.0144144
ENSG00000159593.14	NAE1	protein_coding	4104.15	0.188817	0.0560469	3.36891	0.000754669	0.0144866
ENSG00000135919.12	SERPINE2	protein_coding	4073.87	0.185358	0.0550394	3.36774	0.000757882	0.0145319
ENSG00000111229.15	ARPC3	protein_coding	8078.51	0.167849	0.0498511	3.36701	0.000759868	0.0145536
ENSG00000240053.8	LY6G5B	protein_coding	241.385	0.651978	0.193716	3.36564	0.000763664	0.0145772
ENSG00000197694.15	SPTAN1	protein_coding	17997.6	-0.119733	0.0355723	-3.36592	0.000762902	0.0145772
ENSG00000177706.8	FAM20C	protein_coding	2605	-0.229777	0.0682643	-3.366	0.000762673	0.0145772
ENSG00000177600.8	RPLP2	protein_coding	13711.2	0.148231	0.0440704	3.36351	0.00076959	0.0146739
ENSG00000064932.15	SBNO2	protein_coding	3230.44	-0.201863	0.0600371	-3.36231	0.000772943	0.0147213
ENSG00000171530.13	TBCA	protein_coding	2993.57	0.242447	0.0721828	3.35879	0.00078285	0.0148934
ENSG00000072778.19	ACADVL	protein_coding	9300.16	0.139316	0.0415057	3.35655	0.00078922	0.0149978
ENSG00000164096.12	C4orf3	protein_coding	2270.3	0.240619	0.0717234	3.35482	0.000794154	0.0150748
ENSG00000244122.2	UGT1A7	protein_coding	6.80847	6.20123	1.85195	3.3485	0.000812517	0.0154062
ENSG00000156671.12	SAMD8	protein_coding	3621.43	-0.201225	0.0601058	-3.34785	0.000814411	0.0154249
ENSG00000095596.11	CYP26A1	protein_coding	19.2211	2.56981	0.767673	3.34753	0.000815347	0.0154255
ENSG00000136682.14	CBWD2	protein_coding	1189.07	0.313835	0.0938393	3.34439	0.000824647	0.0155839
ENSG00000116791.13	CRYZ	protein_coding	3542.21	0.201255	0.0601823	3.34409	0.000825544	0.0155839
ENSG00000117676.13	RPS6KA1	protein_coding	5150.85	-0.178591	0.0534779	-3.33953	0.00083921	0.0158243
ENSG00000049759.17	NEDD4L	protein_coding	11322.4	-0.146322	0.0438782	-3.33474	0.000853796	0.0160816
ENSG00000166068.12	SPRED1	protein_coding	6305.79	-0.171605	0.0514955	-3.33243	0.000860897	0.0161974
ENSG00000113013.12	HSPA9	protein_coding	33579.6	0.118377	0.0355321	3.33154	0.000863654	0.0162314
ENSG00000184009.10	ACTG1	protein_coding	121765	-0.105467	0.0316645	-3.33077	0.000866055	0.0162586
ENSG00000105220.15	GPI	protein_coding	25672.5	0.111361	0.0334441	3.32978	0.000869156	0.0162809
ENSG00000044574.7	HSPA5	protein_coding	46020	0.107821	0.0323788	3.32999	0.000868485	0.0162809
ENSG00000060749.14	QSER1	protein_coding	5049.49	-0.19064	0.0572615	-3.32928	0.000870693	0.0162918
ENSG00000120129.5	DUSP1	protein_coding	571.61	0.423309	0.12756	3.31852	0.000904972	0.0168687
ENSG00000138768.14	USO1	protein_coding	5468.33	0.163156	0.0491647	3.31856	0.000904837	0.0168687
ENSG00000125691.12	RPL23	protein_coding	13399.8	0.154932	0.0466895	3.31836	0.000905484	0.0168687
ENSG00000128340.14	RAC2	protein_coding	2744.69	-0.209896	0.0632424	-3.31891	0.000903687	0.0168687
ENSG00000100316.15	RPL3	protein_coding	57464.2	0.106966	0.032253	3.31647	0.000911623	0.0169645
ENSG00000117054.13	ACADM	protein_coding	2764.28	0.215033	0.0648957	3.31351	0.000921338	0.017108
ENSG00000171608.15	PIK3CD	protein_coding	512.939	-0.456748	0.137842	-3.31357	0.000921122	0.017108
ENSG00000109452.12	INPP4B	protein_coding	896.102	-0.341215	0.103032	-3.31176	0.000927119	0.0171966
ENSG00000101040.19	ZMYND8	protein_coding	3202.56	0.197403	0.0596341	3.31023	0.000932178	0.0172716
ENSG00000135776.4	ABCB10	protein_coding	3955.16	0.184279	0.0556792	3.30965	0.000934118	0.0172888
ENSG00000178741.11	COX5A	protein_coding	4980.65	0.166651	0.0503682	3.30866	0.000937425	0.0173124
ENSG00000122406.13	RPL5	protein_coding	27788.2	0.154254	0.0466199	3.30875	0.000937125	0.0173124
ENSG00000112715.21	VEGFA	protein_coding	3483.05	0.197632	0.0597583	3.3072	0.000942342	0.0173799
ENSG00000160949.16	TONSL	protein_coding	4588	-0.19115	0.0578023	-3.30697	0.000943117	0.0173799
ENSG00000130724.8	CHMP2A	protein_coding	4044.68	0.17849	0.0540233	3.30395	0.000953337	0.0175492
ENSG00000118985.15	ELL2	protein_coding	5416.11	0.160752	0.0486868	3.30176	0.000960812	0.0176677
ENSG00000159200.17	RCAN1	protein_coding	2693.9	-0.209059	0.0633248	-3.30138	0.000962106	0.0176725
ENSG00000130021.13	PUDP	protein_coding	2199.6	0.229307	0.0694952	3.29961	0.000968198	0.0177652
ENSG00000138449.10	SLC40A1	protein_coding	55.1271	-1.36873	0.415055	-3.29772	0.000974745	0.0178661
ENSG00000114023.15	FAM162A	protein_coding	3475.57	0.214455	0.0651011	3.29418	0.000987077	0.0180727
ENSG00000164690.7	SHH	protein_coding	417.37	0.488445	0.148358	3.29235	0.000993551	0.0181718
ENSG00000140006.11	WDR89	protein_coding	2627.51	0.223064	0.0677975	3.29015	0.00100133	0.0182884
ENSG00000033170.16	FUT8	protein_coding	10269.3	-0.135044	0.0410476	-3.28994	0.00100207	0.0182884
ENSG00000167491.17	GATAD2A	protein_coding	7023.33	-0.147991	0.0450513	-3.28494	0.00102004	0.0185964
ENSG00000143549.19	TPM3	protein_coding	28439.1	-0.113346	0.0345321	-3.28234	0.00102949	0.0187285
ENSG00000120162.9	MOB3B	protein_coding	40.0508	-1.61316	0.491431	-3.28258	0.00102864	0.0187285
ENSG00000197756.9	RPL37A	protein_coding	20772.7	0.153727	0.0468468	3.28149	0.0010326	0.0187652
ENSG00000110047.17	EHD1	protein_coding	10369.3	-0.1358	0.0414003	-3.28018	0.00103742	0.0188327
ENSG00000159063.12	ALG8	protein_coding	3487.86	0.186928	0.0570179	3.2784	0.00104397	0.0189118
ENSG00000237945.7	LINC00649	antisense	848.65	-0.349869	0.10672	-3.27839	0.001044	0.0189118
ENSG00000189266.11	PNRC2	protein_coding	5731.6	0.168898	0.0515721	3.27499	0.00105664	0.0191205
ENSG00000008086.11	CDKL5	protein_coding	1204.22	0.30933	0.0945152	3.27281	0.00106486	0.0192488
ENSG00000172164.13	SNTB1	protein_coding	408.209	0.492495	0.150732	3.26736	0.00108555	0.019602
ENSG00000186594.14	MIR22HG	lincRNA	579.199	0.412561	0.126433	3.26307	0.00110213	0.0198593
ENSG00000128590.4	DNAJB9	protein_coding	1021.79	0.325448	0.0997304	3.26328	0.00110129	0.0198593
ENSG00000178726.6	THBD	protein_coding	484.605	0.455251	0.139544	3.26242	0.00110463	0.0198834
ENSG00000178104.19	PDE4DIP	protein_coding	1508.18	-0.288292	0.0883909	-3.26155	0.00110803	0.0199235
ENSG00000132780.16	NASP	protein_coding	6793.88	0.148438	0.0455547	3.25846	0.00112019	0.020121
ENSG00000037965.5	HOXC8	protein_coding	153.886	-0.786702	0.241813	-3.25335	0.00114054	0.020465
ENSG00000124429.17	POF1B	protein_coding	19.3358	2.4272	0.746442	3.2517	0.00114717	0.0205623
ENSG00000164307.12	ERAP1	protein_coding	2562.97	-0.217863	0.0670519	-3.24917	0.00115743	0.0207243
ENSG00000103044.10	HAS3	protein_coding	15092.2	-0.120029	0.0369624	-3.24733	0.00116495	0.020837
ENSG00000166750.9	SLFN5	protein_coding	2019.33	-0.231656	0.0713472	-3.24689	0.00116674	0.0208473
ENSG00000047936.10	ROS1	protein_coding	19.5781	2.46639	0.760348	3.24377	0.0011796	0.0210549
ENSG00000007384.15	RHBDF1	protein_coding	1674.15	0.265206	0.0817677	3.24341	0.00118109	0.0210595
ENSG00000185989.10	RASA3	protein_coding	2109.4	-0.2262	0.0699292	-3.2347	0.00121773	0.02169
ENSG00000166401.14	SERPINB8	protein_coding	2290.56	-0.221472	0.0685021	-3.23307	0.00122469	0.0217912
ENSG00000162981.13	FAM84A	protein_coding	4225.25	0.173735	0.0537543	3.23202	0.00122919	0.0218032
ENSG00000101439.8	CST3	protein_coding	6656.94	0.158484	0.0490302	3.23238	0.00122765	0.0218032
ENSG00000115267.5	IFIH1	protein_coding	168.35	-0.748677	0.231638	-3.2321	0.00122884	0.0218032
ENSG00000047457.13	CP	protein_coding	39.974	1.57212	0.486815	3.22939	0.00124053	0.0219814
ENSG00000095794.19	CREM	protein_coding	5637.31	0.154909	0.048032	3.22511	0.00125923	0.0222887
ENSG00000197467.14	COL13A1	protein_coding	4206.28	-0.178745	0.0554279	-3.22483	0.00126049	0.0222887
ENSG00000174233.11	ADCY6	protein_coding	2040.25	-0.235017	0.0729039	-3.22366	0.00126563	0.0223565
ENSG00000109046.14	WSB1	protein_coding	2314.92	0.224623	0.0697785	3.21909	0.00128599	0.0226926
ENSG00000135164.18	DMTF1	protein_coding	2258.49	0.240612	0.0748686	3.21378	0.00130998	0.0230919
ENSG00000135749.18	PCNX2	protein_coding	988.762	-0.315172	0.0982158	-3.20897	0.00133212	0.0234579
ENSG00000140379.7	BCL2A1	protein_coding	27.744	-1.95227	0.608957	-3.20593	0.00134628	0.0236829
ENSG00000065548.17	ZC3H15	protein_coding	4381.01	0.187171	0.0584057	3.20468	0.00135214	0.0237614
ENSG00000130638.16	ATXN10	protein_coding	7793.24	0.140355	0.0438099	3.20373	0.00135658	0.0238149
ENSG00000041357.15	PSMA4	protein_coding	6462.31	0.191419	0.0597826	3.20193	0.00136511	0.02394
ENSG00000266074.8	BAHCC1	protein_coding	2532.91	-0.225631	0.0704772	-3.20148	0.00136724	0.0239526
ENSG00000204388.6	HSPA1B	protein_coding	10633.8	0.147657	0.0461371	3.20041	0.00137234	0.0240174
ENSG00000184500.14	PROS1	protein_coding	889.048	0.328803	0.102784	3.19896	0.00137924	0.0241134
ENSG00000148400.10	NOTCH1	protein_coding	1932.75	-0.2345	0.0733739	-3.19596	0.00139368	0.0243409
ENSG00000132849.20	PATJ	protein_coding	966.158	-0.323324	0.101186	-3.19535	0.00139662	0.0243673
ENSG00000182446.13	NPLOC4	protein_coding	10041.9	-0.129271	0.0404675	-3.19443	0.00140107	0.0244199
ENSG00000133872.13	SARAF	protein_coding	4652.55	0.166687	0.052211	3.19256	0.00141019	0.0245537
ENSG00000101474.11	APMAP	protein_coding	11658.8	0.129202	0.0404852	3.19135	0.00141609	0.0246313
ENSG00000050767.16	COL23A1	protein_coding	67.3703	1.18153	0.370304	3.19071	0.00141922	0.0246606
ENSG00000076108.11	BAZ2A	protein_coding	5360.61	-0.162295	0.0509329	-3.18645	0.00144033	0.0250019
ENSG00000155313.15	USP25	protein_coding	4050.41	-0.184871	0.0580282	-3.18589	0.0014431	0.0250246
ENSG00000175727.13	MLXIP	protein_coding	4213.36	-0.178123	0.0559576	-3.18318	0.00145668	0.0252275
ENSG00000087245.12	MMP2	protein_coding	126.134	-0.849321	0.266834	-3.18296	0.00145777	0.0252275
ENSG00000131037.14	EPS8L1	protein_coding	19.6647	-2.34478	0.736997	-3.18154	0.00146496	0.0253263
ENSG00000158417.10	EIF5B	protein_coding	14935.6	0.121558	0.0382179	3.18066	0.00146938	0.025377
ENSG00000161847.13	RAVER1	protein_coding	6229.2	-0.162602	0.0511897	-3.17646	0.00149084	0.0257216
ENSG00000176018.12	LYSMD3	protein_coding	3514.85	0.185555	0.0584226	3.17608	0.00149278	0.025729
ENSG00000109107.13	ALDOC	protein_coding	1731.67	0.242433	0.0763774	3.17415	0.00150278	0.025849
ENSG00000111011.17	RSRC2	protein_coding	3834.35	0.18841	0.0593575	3.17415	0.00150274	0.025849
ENSG00000100934.14	SEC23A	protein_coding	17744.8	0.118587	0.037369	3.17341	0.00150661	0.0258888
ENSG00000196754.10	S100A2	protein_coding	4321.45	0.414222	0.130581	3.17214	0.00151319	0.0259757
ENSG00000182899.15	RPL35A	protein_coding	14369.2	0.162943	0.0514225	3.16872	0.00153112	0.026257
ENSG00000198121.13	LPAR1	protein_coding	4012.02	-0.173306	0.0547055	-3.16799	0.00153496	0.0262779
ENSG00000134853.11	PDGFRA	protein_coding	613.705	-0.399491	0.126106	-3.1679	0.00153542	0.0262779
ENSG00000152518.7	ZFP36L2	protein_coding	3851.6	-0.175731	0.0555	-3.16633	0.00154377	0.0263944
ENSG00000157224.15	CLDN12	protein_coding	2036.39	0.243881	0.0770641	3.16465	0.00155269	0.0265202
ENSG00000198624.12	CCDC69	protein_coding	1088.87	-0.305602	0.0966011	-3.16355	0.00155858	0.0265941
ENSG00000151276.23	MAGI1	protein_coding	2589.78	0.205804	0.0650775	3.16244	0.00156454	0.026656
ENSG00000111252.10	SH2B3	protein_coding	4525.3	-0.163965	0.0518501	-3.16229	0.00156533	0.026656
ENSG00000183671.12	GPR1	protein_coding	35.3613	1.64196	0.519672	3.1596	0.00157985	0.0268228
ENSG00000168077.13	SCARA3	protein_coding	1934.68	-0.240953	0.0762554	-3.15982	0.00157868	0.0268228
ENSG00000133321.10	RARRES3	protein_coding	594.349	-0.420199	0.132987	-3.15971	0.00157928	0.0268228
ENSG00000055208.18	TAB2	protein_coding	3080.15	-0.196756	0.0622832	-3.15906	0.00158281	0.0268463
ENSG00000138448.11	ITGAV	protein_coding	4065.43	0.172864	0.0547432	3.15773	0.00159003	0.026942
ENSG00000103064.13	SLC7A6	protein_coding	5115.39	0.163071	0.0516483	3.15734	0.00159217	0.0269515
ENSG00000099246.16	RAB18	protein_coding	3486.65	0.180804	0.0572782	3.15659	0.00159625	0.0269936
ENSG00000164934.13	DCAF13	protein_coding	9059.26	0.140799	0.0446568	3.15292	0.00161649	0.0273089
ENSG00000163735.6	CXCL5	protein_coding	189.594	-0.693947	0.220411	-3.14843	0.00164152	0.0277044
ENSG00000164199.17	ADGRV1	protein_coding	3034.83	-0.189685	0.060257	-3.14794	0.00164426	0.0277231
ENSG00000258529.5	RP11-108O10.8	protein_coding	13.4156	3.24914	1.03239	3.1472	0.0016484	0.0277654
ENSG00000175166.16	PSMD2	protein_coding	34412.9	-0.10996	0.0349552	-3.14575	0.00165663	0.0278765
ENSG00000130363.11	RSPH3	protein_coding	395.547	-0.476177	0.15144	-3.14433	0.00166469	0.0279844
ENSG00000125848.9	FLRT3	protein_coding	134.904	0.825454	0.262571	3.14374	0.00166802	0.0279853
ENSG00000123096.11	SSPN	protein_coding	396.992	-0.476711	0.151628	-3.14395	0.00166683	0.0279853
ENSG00000178401.14	DNAJC22	protein_coding	1087.3	-0.302916	0.0963866	-3.14272	0.00167386	0.0280557
ENSG00000221914.9	PPP2R2A	protein_coding	4179.95	0.175919	0.0560045	3.14117	0.00168277	0.0281773
ENSG00000181915.4	ADO	protein_coding	6797.17	-0.142237	0.0453326	-3.13763	0.00170318	0.0284818
ENSG00000104856.13	RELB	protein_coding	679.284	-0.366334	0.116762	-3.13744	0.00170429	0.0284818
ENSG00000243147.7	MRPL33	protein_coding	1376.22	0.283584	0.0904479	3.13534	0.00171658	0.0285832
ENSG00000111057.10	KRT18	protein_coding	10945.9	-0.13575	0.0432912	-3.13573	0.00171424	0.0285832
ENSG00000163539.16	CLASP2	protein_coding	3006.87	-0.191013	0.0609201	-3.13546	0.00171584	0.0285832
ENSG00000135378.3	PRRG4	protein_coding	353.955	-0.508741	0.162265	-3.13525	0.00171707	0.0285832
ENSG00000139973.16	SYT16	protein_coding	5289.29	0.178213	0.0568494	3.13482	0.00171958	0.028597
ENSG00000206538.8	VGLL3	protein_coding	34.7949	-1.74571	0.557052	-3.13383	0.00172538	0.0286655
ENSG00000219481.10	NBPF1	protein_coding	7642.56	-0.137654	0.0439867	-3.12945	0.00175131	0.0290681
ENSG00000173517.10	PEAK1	protein_coding	1341.91	-0.265872	0.0850224	-3.12709	0.00176548	0.0292746
ENSG00000182004.12	SNRPE	protein_coding	2480.32	0.230775	0.073864	3.12433	0.00178213	0.029522
ENSG00000168453.14	HR	protein_coding	2917.96	-0.207604	0.0664576	-3.12386	0.00178498	0.0295405
ENSG00000143479.15	DYRK3	protein_coding	669.103	-0.368584	0.118101	-3.12092	0.00180289	0.0298081
ENSG00000169020.9	ATP5I	protein_coding	1491.4	0.302225	0.0968676	3.11998	0.00180861	0.0298246
ENSG00000197780.9	TAF13	protein_coding	1437.3	0.261128	0.0836977	3.1199	0.00180914	0.0298246
ENSG00000139278.9	GLIPR1	protein_coding	443.004	-0.464887	0.148999	-3.12008	0.00180804	0.0298246
ENSG00000116171.17	SCP2	protein_coding	8867.44	0.130272	0.0417914	3.11719	0.00182583	0.030022
ENSG00000135090.13	TAOK3	protein_coding	1187.75	-0.281078	0.090169	-3.11724	0.00182555	0.030022
ENSG00000164379.6	FOXQ1	protein_coding	154.46	-0.77483	0.248574	-3.1171	0.0018264	0.030022
ENSG00000131759.17	RARA	protein_coding	1070.93	-0.296481	0.0952852	-3.1115	0.00186136	0.0305672
ENSG00000087494.15	PTHLH	protein_coding	678.959	-0.3623	0.116459	-3.11097	0.00186473	0.0305931
ENSG00000134508.12	CABLES1	protein_coding	5032.65	0.160697	0.0516779	3.10959	0.00187348	0.030707
ENSG00000081377.16	CDC14B	protein_coding	2114.17	0.218399	0.0703085	3.10629	0.00189448	0.0309916
ENSG00000213719.8	CLIC1	protein_coding	18428.4	-0.111173	0.0357874	-3.10648	0.00189329	0.0309916
ENSG00000070501.11	POLB	protein_coding	1370.18	0.282497	0.0909687	3.10543	0.0019	0.0309982
ENSG00000167863.11	ATP5H	protein_coding	6324.27	0.184626	0.0594472	3.10571	0.00189822	0.0309982
ENSG00000105063.18	PPP6R1	protein_coding	17887.4	-0.124751	0.0401726	-3.10538	0.00190034	0.0309982
ENSG00000130147.15	SH3BP4	protein_coding	1878.69	-0.239847	0.0773355	-3.10139	0.00192617	0.0313896
ENSG00000109625.18	CPZ	protein_coding	345.676	-0.500535	0.161411	-3.10099	0.00192876	0.0314017
ENSG00000136247.14	ZDHHC4	protein_coding	3011.54	0.192626	0.0621367	3.10004	0.00193494	0.0314723
ENSG00000104880.17	ARHGEF18	protein_coding	6109.08	-0.149337	0.0481811	-3.09949	0.00193853	0.0315007
ENSG00000157064.10	NMNAT2	protein_coding	670.797	-0.387106	0.124973	-3.09752	0.0019515	0.0316811
ENSG00000089737.16	DDX24	protein_coding	10053.2	0.126328	0.040804	3.09598	0.00196165	0.0318157
ENSG00000154027.18	AK5	protein_coding	938.843	-0.323591	0.104557	-3.09487	0.00196898	0.0319041
ENSG00000198380.12	GFPT1	protein_coding	7595.97	0.144326	0.0466467	3.09402	0.00197465	0.0319561
ENSG00000155463.12	OXA1L	protein_coding	6676.39	0.140818	0.0455166	3.09378	0.00197621	0.0319561
ENSG00000139725.7	RHOF	protein_coding	5290	-0.159987	0.0517163	-3.09354	0.00197781	0.0319561
ENSG00000150403.17	TMCO3	protein_coding	4746.8	-0.161551	0.0522523	-3.09175	0.00198982	0.0321198
ENSG00000213585.10	VDAC1	protein_coding	16852.8	0.123602	0.0400884	3.08324	0.00204757	0.0330208
ENSG00000138398.15	PPIG	protein_coding	4881.64	0.175379	0.0569343	3.08038	0.00206734	0.0333081
ENSG00000179913.10	B3GNT3	protein_coding	449.104	-0.45834	0.148819	-3.07986	0.00207098	0.0333352
ENSG00000170439.6	METTL7B	protein_coding	131.372	-0.810367	0.263213	-3.07875	0.00207873	0.0334284
ENSG00000100600.14	LGMN	protein_coding	2680.18	0.199046	0.0646574	3.07846	0.0020807	0.0334285
ENSG00000228474.5	OST4	protein_coding	3592.32	0.201324	0.0654172	3.07753	0.0020872	0.0335014
ENSG00000055070.16	SZRD1	protein_coding	9719.84	-0.128332	0.0417252	-3.07566	0.00210038	0.0336812
ENSG00000135486.17	HNRNPA1	protein_coding	40911.2	0.11474	0.0373124	3.07512	0.00210415	0.0337099
ENSG00000135845.9	PIGC	protein_coding	4087.02	0.179965	0.0585498	3.07371	0.00211418	0.0338388
ENSG00000169418.9	NPR1	protein_coding	52.7089	1.28215	0.417313	3.07239	0.0021235	0.0339221
ENSG00000165512.4	ZNF22	protein_coding	2725	0.208436	0.0678475	3.07213	0.00212535	0.0339221
ENSG00000149639.14	SOGA1	protein_coding	7310.36	-0.138991	0.0452407	-3.07225	0.00212449	0.0339221
ENSG00000184481.16	FOXO4	protein_coding	317.47	0.523019	0.170383	3.06967	0.00214293	0.0341707
ENSG00000137509.10	PRCP	protein_coding	6865.02	0.139179	0.0453867	3.06651	0.00216574	0.034502
ENSG00000100219.16	XBP1	protein_coding	4072.04	0.166264	0.0542413	3.06527	0.00217477	0.0346135
ENSG00000124383.8	MPHOSPH10	protein_coding	2433.11	0.235537	0.0768677	3.06418	0.00218264	0.0347065
ENSG00000113356.11	POLR3G	protein_coding	5719.76	0.155506	0.0507604	3.06353	0.0021874	0.0347173
ENSG00000055483.19	USP36	protein_coding	4799.5	-0.164331	0.0536383	-3.06368	0.0021863	0.0347173
ENSG00000154217.14	PITPNC1	protein_coding	1565	-0.258167	0.0843112	-3.06207	0.00219809	0.0348545
ENSG00000137266.14	SLC22A23	protein_coding	1196.5	0.290446	0.0948923	3.0608	0.00220747	0.0349708
ENSG00000115541.10	HSPE1	protein_coding	6919.82	0.185199	0.0605149	3.06039	0.00221048	0.0349859
ENSG00000104412.7	EMC2	protein_coding	2013.69	0.234322	0.0766142	3.05847	0.00222473	0.0351787
ENSG00000203667.9	COX20	protein_coding	2835.97	0.21647	0.0708336	3.05603	0.00224286	0.0354327
ENSG00000106355.9	LSM5	protein_coding	2900.74	0.199288	0.0652783	3.05289	0.00226646	0.0357723
ENSG00000180818.4	HOXC10	protein_coding	30.6591	-1.71152	0.561215	-3.04966	0.00229101	0.0361263
ENSG00000166136.15	NDUFB8	protein_coding	4833.19	0.161319	0.0529346	3.04751	0.00230744	0.0363518
ENSG00000156030.13	ELMSAN1	protein_coding	4357.8	0.161599	0.0530411	3.04667	0.00231391	0.0363865
ENSG00000167792.11	NDUFV1	protein_coding	9599.21	0.127007	0.0416869	3.04669	0.00231373	0.0363865
ENSG00000150907.7	FOXO1	protein_coding	654.323	0.377286	0.123919	3.04462	0.00232972	0.0366012
ENSG00000076944.15	STXBP2	protein_coding	4431.22	-0.167916	0.0551661	-3.04382	0.00233595	0.0366654
ENSG00000169895.5	SYAP1	protein_coding	9184.71	0.129778	0.0426638	3.04188	0.00235109	0.0368352
ENSG00000171988.18	JMJD1C	protein_coding	8327.43	-0.131885	0.0433563	-3.04189	0.00235099	0.0368352
ENSG00000156675.15	RAB11FIP1	protein_coding	1747.45	0.236982	0.0779238	3.0412	0.00235638	0.0368841
ENSG00000059573.8	ALDH18A1	protein_coding	10754.5	0.12112	0.0398306	3.04088	0.00235884	0.0368888
ENSG00000165434.7	PGM2L1	protein_coding	838.34	0.326632	0.107615	3.03519	0.00240384	0.0375237
ENSG00000077549.17	CAPZB	protein_coding	7680.57	-0.133426	0.0439586	-3.03526	0.00240332	0.0375237
ENSG00000224163.4	RP11-309L24.6	unprocessed_pseudogene	10.4496	3.69645	1.21878	3.0329	0.00242217	0.0377752
ENSG00000254087.7	LYN	protein_coding	575.33	0.386626	0.12749	3.03259	0.00242462	0.0377789
ENSG00000006007.11	GDE1	protein_coding	7536.98	0.137246	0.0452668	3.03195	0.00242981	0.0378251
ENSG00000231131.6	RP11-346D6.6	lincRNA	92.5868	-0.966201	0.318875	-3.03003	0.00244529	0.0380314
ENSG00000169612.3	FAM103A1	protein_coding	1316.78	0.259646	0.0857475	3.02803	0.00246158	0.0382498
ENSG00000143933.16	CALM2	protein_coding	17059	0.109359	0.0361208	3.02758	0.00246519	0.038271
ENSG00000123485.11	HJURP	protein_coding	4538.11	0.157673	0.0520931	3.02676	0.00247193	0.0383408
ENSG00000114268.11	PFKFB4	protein_coding	2021.44	0.215737	0.0713185	3.02497	0.00248654	0.0385323
ENSG00000147251.15	DOCK11	protein_coding	234.236	-0.625333	0.206793	-3.02396	0.00249489	0.0386266
ENSG00000088827.12	SIGLEC1	protein_coding	9.13631	5.13608	1.69882	3.02332	0.00250019	0.0386736
ENSG00000150630.3	VEGFC	protein_coding	1393.89	-0.257676	0.0852388	-3.02299	0.0025029	0.0386804
ENSG00000162772.16	ATF3	protein_coding	366.57	-0.482094	0.159562	-3.02135	0.00251651	0.0388555
ENSG00000128059.8	PPAT	protein_coding	4517.8	0.157	0.0520827	3.01443	0.00257462	0.0397168
ENSG00000145882.10	PCYOX1L	protein_coding	1413.47	0.271684	0.0902359	3.01082	0.00260545	0.0401559
ENSG00000135525.18	MAP7	protein_coding	373.108	-0.470755	0.156426	-3.00945	0.00261718	0.0403003
ENSG00000100003.17	SEC14L2	protein_coding	1304.45	0.266901	0.088743	3.00757	0.00263347	0.0405066
ENSG00000115457.9	IGFBP2	protein_coding	5849.48	0.164026	0.0545415	3.00735	0.00263533	0.0405066
ENSG00000165525.17	NEMF	protein_coding	4134.09	0.177706	0.0590974	3.00701	0.00263833	0.0405162
ENSG00000214944.9	ARHGEF28	protein_coding	1868.42	-0.23738	0.0789632	-3.00621	0.00264525	0.0405858
ENSG00000163788.13	SNRK	protein_coding	2000.93	-0.214368	0.0714009	-3.00231	0.00267938	0.0410725
ENSG00000215914.4	MMP23A	unprocessed_pseudogene	14.4358	3.08185	1.0266	3.002	0.00268214	0.0410779
ENSG00000153294.11	ADGRF4	protein_coding	29.3884	-1.7533	0.584261	-3.00089	0.00269194	0.041191
ENSG00000151715.7	TMEM45B	protein_coding	1439.18	0.249839	0.083276	3.00013	0.00269863	0.0412193
ENSG00000121281.12	ADCY7	protein_coding	643.177	-0.373312	0.124421	-3.00039	0.00269636	0.0412193
ENSG00000125968.8	ID1	protein_coding	4334.02	0.174771	0.0582716	2.99924	0.0027065	0.0413026
ENSG00000107863.17	ARHGAP21	protein_coding	5734.9	-0.147792	0.0492881	-2.99854	0.0027128	0.0413616
ENSG00000196954.13	CASP4	protein_coding	775.965	-0.341296	0.113904	-2.99634	0.0027324	0.0416233
ENSG00000072062.13	PRKACA	protein_coding	7309.27	-0.132805	0.0443388	-2.99524	0.00274226	0.0417358
ENSG00000135424.15	ITGA7	protein_coding	119.008	-0.832566	0.277988	-2.99497	0.00274468	0.0417358
ENSG00000189108.12	IL1RAPL2	protein_coding	157.12	0.746407	0.24933	2.99365	0.00275665	0.0418805
ENSG00000111676.14	ATN1	protein_coding	4921.41	-0.150647	0.0503488	-2.99207	0.00277097	0.0420605
ENSG00000067141.16	NEO1	protein_coding	900.913	0.307785	0.102908	2.99088	0.00278171	0.042186
ENSG00000163293.11	NIPAL1	protein_coding	845.837	-0.318883	0.10664	-2.99029	0.00278713	0.0422306
ENSG00000103507.13	BCKDK	protein_coding	3237.07	0.175894	0.0588485	2.98893	0.00279958	0.0423815
ENSG00000148834.12	GSTO1	protein_coding	2685.65	0.199029	0.0666273	2.9872	0.00281546	0.0425785
ENSG00000183248.11	PRR36	protein_coding	312.427	-0.530426	0.17758	-2.98697	0.00281758	0.0425785
ENSG00000120149.8	MSX2	protein_coding	421.391	0.444174	0.148907	2.98289	0.00285545	0.0428655
ENSG00000123358.19	NR4A1	protein_coding	473.51	0.419682	0.140692	2.98298	0.00285457	0.0428655
ENSG00000279088.1	RP11-574K11.24	TEC	490.76	0.414856	0.139032	2.98389	0.00284608	0.0428655
ENSG00000105643.9	ARRDC2	protein_coding	1781.32	0.237457	0.0795674	2.98435	0.00284183	0.0428655
ENSG00000179010.14	MRFAP1	protein_coding	13963.2	0.117391	0.0393431	2.98377	0.00284724	0.0428655
ENSG00000183495.13	EP400	protein_coding	7288.93	-0.140883	0.0472325	-2.98275	0.0028567	0.0428655
ENSG00000164733.20	CTSB	protein_coding	4970.13	-0.151957	0.0509385	-2.98315	0.00285302	0.0428655
ENSG00000237380.6	HOXD-AS2	antisense	68.2201	-1.09194	0.366015	-2.98331	0.00285147	0.0428655
ENSG00000105388.15	CEACAM5	protein_coding	11.6174	-3.06177	1.02664	-2.98233	0.00286065	0.0428871
ENSG00000146281.5	PM20D2	protein_coding	1887.61	-0.218287	0.07323	-2.98084	0.0028746	0.0430584
ENSG00000197785.13	ATAD3A	protein_coding	11481	-0.138767	0.0465653	-2.98005	0.00288198	0.043131
ENSG00000172348.14	RCAN2	protein_coding	830.312	-0.329996	0.110754	-2.97954	0.00288678	0.043165
ENSG00000131871.14	VIMP	protein_coding	2197.82	0.211537	0.0710113	2.97892	0.00289268	0.0431957
ENSG00000140945.16	CDH13	protein_coding	10.746	-3.31107	1.11155	-2.97879	0.00289391	0.0431957
ENSG00000107771.16	CCSER2	protein_coding	1690.06	-0.239085	0.0802917	-2.97771	0.00290412	0.0433103
ENSG00000169116.11	PARM1	protein_coding	120.755	-0.815242	0.273992	-2.97542	0.0029259	0.0435969
ENSG00000230590.9	FTX	lincRNA	953.753	0.335158	0.112697	2.97398	0.00293965	0.0437636
ENSG00000147889.17	CDKN2A	protein_coding	2553.92	-0.209763	0.0705426	-2.97357	0.00294357	0.0437837
ENSG00000166228.8	PCBD1	protein_coding	3337.28	-0.172342	0.0579639	-2.97326	0.00294656	0.0437899
ENSG00000147687.18	TATDN1	protein_coding	1790.86	0.230033	0.0774294	2.97088	0.0029695	0.0440924
ENSG00000161791.13	FMNL3	protein_coding	987.958	-0.299179	0.10072	-2.97042	0.00297396	0.0441201
ENSG00000134419.15	RPS15A	protein_coding	11487.2	0.138826	0.0467794	2.96767	0.00300064	0.0444773
ENSG00000150316.11	CWC15	protein_coding	2423.98	0.223581	0.0753888	2.96571	0.00301989	0.0446849
ENSG00000163029.15	SMC6	protein_coding	4052.37	0.178701	0.0602551	2.96575	0.0030195	0.0446849
ENSG00000160218.12	TRAPPC10	protein_coding	3449.35	-0.173442	0.0584932	-2.96517	0.00302514	0.0447238
ENSG00000133193.12	FAM104A	protein_coding	3869.52	0.168858	0.0569566	2.96469	0.00302991	0.0447554
ENSG00000108840.15	HDAC5	protein_coding	1403.2	-0.251362	0.0848592	-2.9621	0.00305544	0.0450935
ENSG00000105355.8	PLIN3	protein_coding	5857.81	-0.154667	0.052227	-2.96145	0.00306199	0.0451511
ENSG00000104290.10	FZD3	protein_coding	1053.86	0.282705	0.095504	2.96013	0.00307505	0.045254
ENSG00000101224.17	CDC25B	protein_coding	14660.6	0.109517	0.0369996	2.95995	0.00307693	0.045254
ENSG00000128283.6	CDC42EP1	protein_coding	4263.45	-0.170223	0.0575065	-2.96006	0.00307579	0.045254
ENSG00000137845.14	ADAM10	protein_coding	5581.3	0.143675	0.048552	2.95921	0.00308429	0.0453231
ENSG00000122644.12	ARL4A	protein_coding	1407.75	0.278892	0.0943111	2.95715	0.00310497	0.0455485
ENSG00000103222.18	ABCC1	protein_coding	4818.33	0.150541	0.0509073	2.95716	0.00310486	0.0455485
ENSG00000197415.11	VEPH1	protein_coding	293.12	-0.536002	0.18131	-2.95628	0.00311376	0.0456381
ENSG00000060237.16	WNK1	protein_coding	6204.66	-0.145187	0.0491433	-2.95437	0.00313313	0.0458825
ENSG00000158406.4	HIST1H4H	protein_coding	556.497	0.379073	0.128362	2.95317	0.0031453	0.0460213
ENSG00000166557.12	TMED3	protein_coding	4945.84	0.156044	0.0528765	2.9511	0.00316645	0.046291
ENSG00000253276.2	CCDC71L	protein_coding	1141.65	-0.270222	0.0916249	-2.94922	0.00318578	0.0465337
ENSG00000166441.12	RPL27A	protein_coding	21340.4	0.116309	0.0394538	2.94797	0.00319863	0.0466814
ENSG00000091490.10	SEL1L3	protein_coding	8849.91	-0.125886	0.0427489	-2.94478	0.00323185	0.0470856
ENSG00000174332.5	GLIS1	protein_coding	283.132	-0.527884	0.179258	-2.94482	0.00323139	0.0470856
ENSG00000146701.11	MDH2	protein_coding	20745.2	0.102404	0.0348061	2.94214	0.00325957	0.0474488
ENSG00000131174.4	COX7B	protein_coding	5950.47	0.182681	0.0621017	2.94165	0.00326472	0.0474834
ENSG00000066248.14	NGEF	protein_coding	3440.43	-0.185871	0.0632214	-2.94001	0.00328206	0.0476948
ENSG00000131876.16	SNRPA1	protein_coding	3261.79	0.186353	0.0634627	2.93642	0.00332026	0.0481736
ENSG00000123064.12	DDX54	protein_coding	8627.69	-0.135483	0.0461395	-2.93638	0.00332066	0.0481736
ENSG00000131323.14	TRAF3	protein_coding	3448.27	-0.168027	0.0572384	-2.93557	0.00332937	0.0482588
ENSG00000172318.5	B3GALT1	protein_coding	1041.46	0.29038	0.0989362	2.93502	0.00333524	0.0483029
ENSG00000138386.16	NAB1	protein_coding	1707.33	0.225115	0.0767079	2.9347	0.00333869	0.0483117
ENSG00000000419.12	DPM1	protein_coding	5508.28	0.145157	0.0494699	2.93424	0.00334364	0.0483424
ENSG00000073711.10	PPP2R3A	protein_coding	777.874	-0.322278	0.10985	-2.93381	0.00334828	0.0483685
ENSG00000167088.10	SNRPD1	protein_coding	3629.73	0.195013	0.0665124	2.93198	0.0033681	0.0484906
ENSG00000161203.13	AP2M1	protein_coding	23021.8	-0.102989	0.0351232	-2.93222	0.00336544	0.0484906
ENSG00000111331.12	OAS3	protein_coding	6096.91	-0.145607	0.0496537	-2.93244	0.00336306	0.0484906
ENSG00000165105.9	RASEF	protein_coding	14.0131	-2.60974	0.890096	-2.93198	0.00336811	0.0484906
ENSG00000072832.14	CRMP1	protein_coding	919.258	0.296527	0.10116	2.93126	0.00337587	0.0485613
ENSG00000067704.9	IARS2	protein_coding	20135.5	0.101427	0.0346352	2.92844	0.00340672	0.0489637
ENSG00000164253.13	WDR41	protein_coding	1302.28	0.255626	0.0874889	2.92181	0.00348002	0.049975
ENSG00000160213.6	CSTB	protein_coding	11203.5	-0.125656	0.04303	-2.9202	0.00349801	0.0501912
ENSG00000112658.7	SRF	protein_coding	3805.46	-0.163367	0.0559521	-2.91977	0.00350293	0.0502195
ENSG00000144034.14	TPRKB	protein_coding	1465.55	0.258085	0.0884239	2.91872	0.00351467	0.050311
ENSG00000077147.14	TM9SF3	protein_coding	15487.6	0.111198	0.0380989	2.91868	0.00351522	0.050311
ENSG00000100129.17	EIF3L	protein_coding	10132.6	0.120453	0.0412886	2.91735	0.00353023	0.0504835
ENSG00000113742.12	CPEB4	protein_coding	2282.86	-0.198759	0.0681369	-2.91705	0.00353364	0.0504899
ENSG00000162851.7	TFB2M	protein_coding	2031.85	0.207514	0.0711492	2.9166	0.0035387	0.0505199
ENSG00000106028.10	SSBP1	protein_coding	6038.87	0.157616	0.0540607	2.91553	0.00355086	0.0506511
ENSG00000166086.12	JAM3	protein_coding	827.194	0.310787	0.106773	2.91073	0.00360588	0.0513928
ENSG00000176890.15	TYMS	protein_coding	15641	0.105488	0.0362599	2.90921	0.00362338	0.0515337
ENSG00000170523.3	KRT83	protein_coding	196.007	-0.640327	0.220105	-2.9092	0.00362359	0.0515337
ENSG00000150551.10	LYPD1	protein_coding	85.4513	-1.0141	0.348596	-2.90909	0.00362483	0.0515337
ENSG00000129235.10	TXNDC17	protein_coding	3014.47	0.203661	0.0700161	2.90878	0.00362844	0.0515419
ENSG00000183421.11	RIPK4	protein_coding	2702.91	-0.192354	0.066144	-2.9081	0.00363628	0.0516104
ENSG00000132541.10	RIDA	protein_coding	1068.31	0.283899	0.0976861	2.90624	0.00365798	0.0518752
ENSG00000135898.9	GPR55	protein_coding	18.878	2.1211	0.730261	2.90458	0.00367742	0.0520324
ENSG00000196526.10	AFAP1	protein_coding	9674.09	-0.122531	0.0421865	-2.90451	0.00367823	0.0520324
ENSG00000105289.14	TJP3	protein_coding	48.1166	-1.26688	0.436132	-2.90481	0.00367479	0.0520324
ENSG00000100568.10	VTI1B	protein_coding	19006.1	0.104114	0.0358568	2.90361	0.00368891	0.0521403
ENSG00000174444.14	RPL4	protein_coding	53418.8	0.104441	0.0359734	2.90328	0.00369281	0.0521521
ENSG00000147100.10	SLC16A2	protein_coding	654.398	-0.355423	0.122462	-2.90231	0.00370416	0.0522646
ENSG00000087076.8	HSD17B14	protein_coding	274.17	-0.537765	0.185303	-2.90208	0.0037069	0.0522646
ENSG00000171067.10	C11orf24	protein_coding	4745.61	0.151062	0.0520799	2.90058	0.0037247	0.0524721
ENSG00000001561.6	ENPP4	protein_coding	1828.21	0.224993	0.0775828	2.90004	0.00373116	0.0524763
ENSG00000074657.13	ZNF532	protein_coding	4037.85	-0.16089	0.0554783	-2.90005	0.00373105	0.0524763
ENSG00000171246.5	NPTX1	protein_coding	236.032	-0.586894	0.202473	-2.89862	0.00374807	0.0526708
ENSG00000028277.21	POU2F2	protein_coding	112.756	-0.836367	0.28861	-2.89792	0.00375648	0.0527455
ENSG00000182934.11	SRPRA	protein_coding	17389.7	0.102916	0.0355525	2.89476	0.00379453	0.0532359
ENSG00000264343.5	NOTCH2NL	protein_coding	1086.85	-0.274245	0.0947659	-2.89392	0.00380467	0.0533342
ENSG00000183853.17	KIRREL	protein_coding	4987.26	-0.145293	0.0502135	-2.8935	0.00380975	0.0533615
ENSG00000068489.12	PRR11	protein_coding	9221.01	-0.129831	0.0448983	-2.89167	0.00383206	0.0536299
ENSG00000149231.12	CCDC82	protein_coding	1745.67	0.219903	0.0762441	2.8842	0.00392415	0.0548227
ENSG00000164237.8	CMBL	protein_coding	13279.9	0.109401	0.0379343	2.88397	0.00392693	0.0548227
ENSG00000003137.8	CYP26B1	protein_coding	71.5218	-1.03473	0.358737	-2.88436	0.00392204	0.0548227
ENSG00000185519.8	FAM131C	protein_coding	325.936	-0.516566	0.179356	-2.88012	0.00397521	0.0554512
ENSG00000090273.13	NUDC	protein_coding	9658.12	-0.132469	0.0460063	-2.87936	0.00398479	0.0554941
ENSG00000112182.14	BACH2	protein_coding	67.1549	-1.06083	0.368407	-2.87951	0.0039829	0.0554941
ENSG00000140350.15	ANP32A	protein_coding	8815.13	0.127503	0.0443415	2.87547	0.00403428	0.0561374
ENSG00000006625.17	GGCT	protein_coding	3798.79	0.176189	0.0612854	2.87489	0.00404172	0.0561951
ENSG00000033867.16	SLC4A7	protein_coding	4423.66	-0.168008	0.0584534	-2.87422	0.0040503	0.0562685
ENSG00000074201.8	CLNS1A	protein_coding	6711.65	0.144173	0.0501672	2.87384	0.00405512	0.0562895
ENSG00000146950.12	SHROOM2	protein_coding	2309.54	0.19303	0.0672152	2.87182	0.00408113	0.0565693
ENSG00000047849.21	MAP4	protein_coding	23626.6	-0.107733	0.0375145	-2.87176	0.00408191	0.0565693
ENSG00000110172.11	CHORDC1	protein_coding	4176.21	0.16714	0.0582177	2.87096	0.00409233	0.0566312
ENSG00000146909.7	NOM1	protein_coding	2892.5	-0.188394	0.0656219	-2.8709	0.00409302	0.0566312
ENSG00000156427.7	FGF18	protein_coding	9.35715	3.51529	1.22464	2.87046	0.00409873	0.0566642
ENSG00000151702.16	FLI1	protein_coding	539.573	-0.374667	0.130649	-2.86774	0.00413409	0.0571068
ENSG00000138764.14	CCNG2	protein_coding	1169.68	0.276178	0.0963457	2.86653	0.00415003	0.0572804
ENSG00000197989.13	SNHG12	antisense	806.373	0.319526	0.111511	2.86542	0.00416461	0.0573402
ENSG00000161960.14	EIF4A1	protein_coding	49711.7	0.110457	0.038547	2.86551	0.00416334	0.0573402
ENSG00000011028.13	MRC2	protein_coding	4081.21	-0.160344	0.0559509	-2.86581	0.00415949	0.0573402
ENSG00000175764.14	TTLL11	protein_coding	666.131	-0.343312	0.119822	-2.86517	0.00416781	0.0573402
ENSG00000111424.10	VDR	protein_coding	929.435	-0.28941	0.101046	-2.86413	0.00418151	0.0574359
ENSG00000213694.3	S1PR3	protein_coding	613.183	-0.350118	0.122237	-2.86425	0.00417996	0.0574359
ENSG00000179832.17	MROH1	protein_coding	1595.68	-0.228534	0.0798078	-2.86356	0.00418911	0.057494
ENSG00000134440.11	NARS	protein_coding	14848.3	0.128104	0.0447554	2.86232	0.00420552	0.0576727
ENSG00000007402.11	CACNA2D2	protein_coding	545.584	0.384115	0.134289	2.86036	0.00423157	0.0579834
ENSG00000120875.8	DUSP4	protein_coding	27569.4	-0.100667	0.0352266	-2.8577	0.00426724	0.0584251
ENSG00000089157.15	RPLP0	protein_coding	123227	0.0896403	0.0313912	2.85559	0.00429572	0.0587679
ENSG00000109919.9	MTCH2	protein_coding	5910.47	0.135126	0.0473303	2.85496	0.00430429	0.0588045
ENSG00000143393.16	PI4KB	protein_coding	4575.98	-0.149571	0.0523914	-2.85488	0.00430529	0.0588045
ENSG00000152779.13	SLC16A12	protein_coding	10.2415	3.19377	1.12063	2.84997	0.00437237	0.0596729
ENSG00000149925.18	ALDOA	protein_coding	62167.6	0.0975944	0.0342485	2.84959	0.00437753	0.0596954
ENSG00000052344.15	PRSS8	protein_coding	16.8039	-2.2236	0.780415	-2.84925	0.00438224	0.0597119
ENSG00000151150.21	ANK3	protein_coding	3032.05	-0.176142	0.0618496	-2.84792	0.00440064	0.0599148
ENSG00000169604.19	ANTXR1	protein_coding	6387.31	-0.13591	0.0477763	-2.84472	0.00444501	0.0604706
ENSG00000068323.16	TFE3	protein_coding	3885.76	-0.159559	0.0560996	-2.84421	0.00445211	0.0605189
ENSG00000122966.15	CIT	protein_coding	3925.79	-0.168715	0.059329	-2.84371	0.00445911	0.0605437
ENSG00000185551.14	NR2F2	protein_coding	2723.71	-0.183974	0.0646983	-2.84358	0.00446104	0.0605437
ENSG00000163220.10	S100A9	protein_coding	343.72	0.464274	0.163325	2.84263	0.00447429	0.0606269
ENSG00000174720.15	LARP7	protein_coding	1053.89	0.284511	0.100083	2.84276	0.0044725	0.0606269
ENSG00000115221.11	ITGB6	protein_coding	18.3701	-2.21671	0.779904	-2.84228	0.00447919	0.0606452
ENSG00000150347.15	ARID5B	protein_coding	3651.13	0.16108	0.0567106	2.84039	0.00450591	0.0609585
ENSG00000140832.9	MARVELD3	protein_coding	18.3783	-2.10341	0.740659	-2.83991	0.0045126	0.0610006
ENSG00000164258.11	NDUFS4	protein_coding	1178.21	0.258017	0.090871	2.83938	0.00452018	0.0610063
ENSG00000050438.16	SLC4A8	protein_coding	237.228	-0.585483	0.206193	-2.83949	0.00451851	0.0610063
ENSG00000101871.14	MID1	protein_coding	2385.98	0.196911	0.0693678	2.83864	0.00453057	0.0610888
ENSG00000148848.14	ADAM12	protein_coding	253.903	-0.532677	0.187665	-2.83844	0.00453346	0.0610888
ENSG00000055163.19	CYFIP2	protein_coding	241.671	-0.553379	0.195081	-2.83666	0.00455883	0.0613821
ENSG00000168653.10	NDUFS5	protein_coding	5992.49	0.174588	0.0615704	2.83558	0.0045743	0.0615418
ENSG00000186479.4	RGS7BP	protein_coding	8.45115	-4.00808	1.41364	-2.8353	0.00457826	0.0615466
ENSG00000057704.12	TMCC3	protein_coding	1673.44	0.220537	0.077794	2.83489	0.00458419	0.0615777
ENSG00000157150.4	TIMP4	protein_coding	27.9308	-1.66215	0.5878	-2.82774	0.00468775	0.0629192
ENSG00000115556.13	PLCD4	protein_coding	158.238	-0.677943	0.24004	-2.82429	0.00473854	0.0635509
ENSG00000232855.6	AF131217.1	lincRNA	158.91	-0.66742	0.236565	-2.82129	0.00478306	0.0640976
ENSG00000160181.8	TFF2	protein_coding	1548.13	0.253197	0.0897858	2.82001	0.00480214	0.0643027
ENSG00000095951.16	HIVEP1	protein_coding	733.576	-0.323805	0.114867	-2.81895	0.00481803	0.0644649
ENSG00000250986.1	AC141928.1	lincRNA	22.368	1.87104	0.66403	2.8177	0.0048369	0.0646664
ENSG00000137843.11	PAK6	protein_coding	274.224	-0.51222	0.18183	-2.81703	0.00484704	0.0647513
ENSG00000169583.12	CLIC3	protein_coding	101.225	0.840624	0.29847	2.81644	0.00485588	0.0648186
ENSG00000100767.16	PAPLN	protein_coding	72.695	1.02026	0.362291	2.81613	0.00486066	0.0648192
ENSG00000157617.16	C2CD2	protein_coding	5132.05	-0.140817	0.0500072	-2.81594	0.00486353	0.0648192
ENSG00000076928.17	ARHGEF1	protein_coding	4702.78	-0.145713	0.0517607	-2.81513	0.00487578	0.064881
ENSG00000197757.7	HOXC6	protein_coding	237.113	-0.556067	0.197515	-2.81531	0.004873	0.064881
ENSG00000007392.16	LUC7L	protein_coding	1277.44	0.246699	0.0876561	2.81439	0.00488698	0.0649764
ENSG00000162664.16	ZNF326	protein_coding	2686.71	0.189194	0.0672294	2.81415	0.00489057	0.0649764
ENSG00000112782.16	CLIC5	protein_coding	22.2829	1.87539	0.66689	2.81215	0.00492117	0.0653319
ENSG00000106086.18	PLEKHA8	protein_coding	2379.49	0.189834	0.0675276	2.8112	0.00493572	0.0654741
ENSG00000047230.14	CTPS2	protein_coding	3211.54	0.172297	0.0612983	2.8108	0.00494188	0.0655049
ENSG00000213593.9	TMX2	protein_coding	10392.3	0.114033	0.0405766	2.81032	0.00494917	0.0655506
ENSG00000204389.9	HSPA1A	protein_coding	11584.9	0.131966	0.0469743	2.80932	0.0049646	0.0657039
ENSG00000125629.14	INSIG2	protein_coding	1075.08	0.266633	0.0950052	2.80651	0.0050082	0.0662295
ENSG00000118922.17	KLF12	protein_coding	1321.87	-0.255672	0.0911521	-2.80489	0.00503335	0.0665105
ENSG00000132153.14	DHX30	protein_coding	6882.95	-0.137737	0.0491129	-2.8045	0.00503942	0.0665391
ENSG00000164086.9	DUSP7	protein_coding	4605.79	-0.146174	0.0521411	-2.80342	0.00505633	0.0667106
ENSG00000170089.15	RP11-423H2.1	transcribed_unprocessed_pseudogene	4286.73	0.154079	0.054989	2.802	0.00507866	0.0669534
ENSG00000161800.12	RACGAP1	protein_coding	4613.02	-0.14494	0.0517362	-2.80151	0.00508635	0.067003
ENSG00000121058.4	COIL	protein_coding	2105.4	0.198281	0.0707997	2.80059	0.00510098	0.0670921
ENSG00000129667.12	RHBDF2	protein_coding	2512.29	-0.185158	0.066112	-2.80068	0.00509952	0.0670921
ENSG00000143321.18	HDGF	protein_coding	19248.3	-0.106548	0.0380621	-2.79932	0.00512109	0.0672147
ENSG00000163939.18	PBRM1	protein_coding	4398	-0.149028	0.0532307	-2.79966	0.00511559	0.0672147
ENSG00000164442.9	CITED2	protein_coding	1232.86	-0.256078	0.0914809	-2.79925	0.00512214	0.0672147
ENSG00000173432.10	SAA1	protein_coding	7.84694	4.91022	1.75443	2.79876	0.00512986	0.0672642
ENSG00000148468.16	FAM171A1	protein_coding	3825.4	0.155101	0.0554471	2.79728	0.00515341	0.0675211
ENSG00000171680.21	PLEKHG5	protein_coding	3286.73	-0.178858	0.063963	-2.79628	0.00516952	0.0676802
ENSG00000107105.14	ELAVL2	protein_coding	821.142	-0.300576	0.107508	-2.79583	0.0051766	0.0677208
ENSG00000135925.8	WNT10A	protein_coding	29.3763	-1.6387	0.586202	-2.79545	0.0051828	0.06775
ENSG00000167553.15	TUBA1C	protein_coding	42254.5	-0.0871319	0.0311901	-2.79358	0.00521283	0.0680903
ENSG00000179134.15	SAMD4B	protein_coding	3640.61	-0.162242	0.0581096	-2.79201	0.00523822	0.0683696
ENSG00000148606.12	POLR3A	protein_coding	11148.2	-0.109459	0.0392159	-2.79118	0.00525162	0.068492
ENSG00000161681.15	SHANK1	protein_coding	26.1393	-1.68537	0.603936	-2.79065	0.00526027	0.0685524
ENSG00000117335.19	CD46	protein_coding	6681.39	0.138164	0.0495244	2.78982	0.00527371	0.0686751
ENSG00000163932.13	PRKCD	protein_coding	1963.25	-0.201209	0.0721303	-2.78953	0.0052785	0.068685
ENSG00000167635.11	ZNF146	protein_coding	7340.88	0.142068	0.0509336	2.78927	0.00528272	0.0686875
ENSG00000137869.14	CYP19A1	protein_coding	8.90478	3.4365	1.23258	2.78807	0.00530238	0.068828
ENSG00000111684.10	LPCAT3	protein_coding	2489.2	0.185398	0.0664913	2.7883	0.0052985	0.068828
ENSG00000159399.9	HK2	protein_coding	8656.83	0.121621	0.043625	2.78787	0.00530564	0.068828
ENSG00000075415.12	SLC25A3	protein_coding	18699.3	0.102196	0.0366663	2.7872	0.00531655	0.0689171
ENSG00000185262.8	UBALD2	protein_coding	1961.44	-0.201221	0.0722101	-2.7866	0.00532641	0.0689924
ENSG00000074181.8	NOTCH3	protein_coding	138.873	-0.715512	0.256859	-2.78563	0.00534246	0.0691478
ENSG00000173548.8	SNX33	protein_coding	1958.41	0.202677	0.0727768	2.78491	0.0053543	0.0692484
ENSG00000101096.19	NFATC2	protein_coding	1730.14	-0.235448	0.0845545	-2.78457	0.00535993	0.0692687
ENSG00000138411.11	HECW2	protein_coding	140.157	-0.774573	0.278415	-2.78208	0.00540121	0.0697492
ENSG00000136158.11	SPRY2	protein_coding	1585.33	-0.220984	0.0794402	-2.78177	0.00540635	0.0697627
ENSG00000092841.18	MYL6	protein_coding	12085.3	-0.111841	0.0402134	-2.78119	0.00541608	0.0698355
ENSG00000101955.14	SRPX	protein_coding	201.616	-0.619147	0.222775	-2.77925	0.00544845	0.0701997
ENSG00000175115.11	PACS1	protein_coding	4629.61	-0.143246	0.0515541	-2.77855	0.0054602	0.0702981
ENSG00000092108.20	SCFD1	protein_coding	2307.55	0.208295	0.0750751	2.77448	0.00552892	0.071129
ENSG00000260822.1	GS1-358P8.4	sense_overlapping	732.1	0.334224	0.12049	2.77388	0.00553929	0.0712087
ENSG00000162889.10	MAPKAPK2	protein_coding	5250.1	-0.137515	0.0495966	-2.77266	0.00555995	0.0714205
ENSG00000177169.9	ULK1	protein_coding	2324.13	-0.187108	0.0674945	-2.77219	0.00556805	0.0714706
ENSG00000009335.17	UBE3C	protein_coding	13343.9	-0.111847	0.040356	-2.7715	0.00557989	0.0715149
ENSG00000140545.14	MFGE8	protein_coding	1476.91	-0.228742	0.0825295	-2.77164	0.00557748	0.0715149
ENSG00000134363.11	FST	protein_coding	30856.1	0.0967802	0.0349558	2.76865	0.00562893	0.0720351
ENSG00000166920.12	C15orf48	protein_coding	14.0784	-2.41933	0.873825	-2.76867	0.00562863	0.0720351
ENSG00000116752.5	BCAS2	protein_coding	2258.67	0.188154	0.0679954	2.76716	0.00565464	0.0723099
ENSG00000130309.10	GLT25D1	protein_coding	12712	0.10802	0.0390647	2.76516	0.00568954	0.0726471
ENSG00000168743.12	NPNT	protein_coding	223.022	-0.568839	0.205715	-2.76518	0.00568921	0.0726471
ENSG00000141644.17	MBD1	protein_coding	1883.98	-0.204941	0.0741455	-2.76404	0.00570901	0.0728411
ENSG00000143776.18	CDC42BPA	protein_coding	7139.99	-0.127391	0.0461145	-2.7625	0.00573602	0.073131
ENSG00000150768.15	DLAT	protein_coding	8796.08	0.117979	0.0427191	2.76174	0.00574948	0.0732479
ENSG00000115233.11	PSMD14	protein_coding	6276.92	0.137962	0.0499623	2.76132	0.00575674	0.0732856
ENSG00000181061.13	HIGD1A	protein_coding	7607.42	0.129116	0.0467718	2.76056	0.00577024	0.0734026
ENSG00000165801.9	ARHGEF40	protein_coding	261.594	-0.509786	0.184692	-2.7602	0.00577655	0.0734281
ENSG00000198363.17	ASPH	protein_coding	55303	0.0890226	0.032259	2.75962	0.00578692	0.0734504
ENSG00000071242.11	RPS6KA2	protein_coding	176.087	-0.62612	0.226876	-2.75974	0.00578474	0.0734504
ENSG00000182534.13	MXRA7	protein_coding	9030.56	0.116357	0.0421956	2.75756	0.00582346	0.0738591
ENSG00000102893.15	PHKB	protein_coding	3369.34	0.161271	0.0584972	2.75691	0.00583507	0.0739514
ENSG00000126945.8	HNRNPH2	protein_coding	4865	0.15158	0.0550049	2.75576	0.00585568	0.0741575
ENSG00000072274.12	TFRC	protein_coding	58601.8	0.0830155	0.0301422	2.75413	0.00588482	0.0744711
ENSG00000185630.18	PBX1	protein_coding	554.5	-0.383941	0.139436	-2.75353	0.0058956	0.074497
ENSG00000067798.15	NAV3	protein_coding	118.858	-0.77625	0.2819	-2.75363	0.00589381	0.074497
ENSG00000196914.8	ARHGEF12	protein_coding	11598.3	-0.118562	0.0430753	-2.75245	0.00591513	0.0746349
ENSG00000171444.17	MCC	protein_coding	55.7636	-1.12678	0.409376	-2.75244	0.00591528	0.0746349
ENSG00000163918.10	RFC4	protein_coding	2165.1	0.190153	0.0691088	2.7515	0.00593231	0.074698
ENSG00000004779.9	NDUFAB1	protein_coding	3046.57	0.181228	0.0658562	2.75187	0.00592561	0.074698
ENSG00000141564.13	RPTOR	protein_coding	5947.35	-0.134887	0.049024	-2.75144	0.00593342	0.074698
ENSG00000184216.13	IRAK1	protein_coding	28195.5	-0.0962534	0.0349958	-2.75043	0.00595168	0.0748725
ENSG00000173726.10	TOMM20	protein_coding	6895.24	0.124875	0.0454416	2.74803	0.0059955	0.0753682
ENSG00000095397.13	DFNB31	protein_coding	544.19	-0.363587	0.13246	-2.74489	0.00605314	0.0760368
ENSG00000153714.5	LURAP1L	protein_coding	264.996	-0.531456	0.19365	-2.74441	0.00606197	0.0760916
ENSG00000159140.19	SON	protein_coding	20577.8	-0.0988399	0.0360196	-2.74406	0.0060684	0.0761162
ENSG00000146278.10	PNRC1	protein_coding	1225.32	0.247524	0.0903546	2.73947	0.00615382	0.0771308
ENSG00000137492.7	THAP12	protein_coding	7950.93	0.122753	0.044841	2.73752	0.00619036	0.0775318
ENSG00000136450.12	SRSF1	protein_coding	20547.4	0.104032	0.0380081	2.7371	0.00619839	0.0775755
ENSG00000164346.9	NSA2	protein_coding	3974.25	0.162711	0.0594759	2.73575	0.00622392	0.0778378
ENSG00000229644.6	NAMPTL	processed_pseudogene	961.67	0.279459	0.102217	2.73396	0.00625767	0.0782025
ENSG00000179912.20	R3HDM2	protein_coding	1674	-0.21918	0.0801791	-2.73364	0.00626393	0.0782234
ENSG00000115760.13	BIRC6	protein_coding	6850.96	-0.123243	0.0450899	-2.73328	0.00627079	0.0782517
ENSG00000140319.10	SRP14	protein_coding	9409.51	0.138926	0.0508351	2.73287	0.00627852	0.0782909
ENSG00000188739.14	RBM34	protein_coding	1313.8	0.24961	0.0914188	2.7304	0.00632575	0.0788222
ENSG00000116406.18	EDEM3	protein_coding	3198.18	0.161913	0.0593082	2.73002	0.00633304	0.0788554
ENSG00000143457.10	GOLPH3L	protein_coding	1452.5	-0.224661	0.0823534	-2.72801	0.0063717	0.0792789
ENSG00000157111.12	TMEM171	protein_coding	266.345	-0.504843	0.185215	-2.72572	0.00641615	0.0797737
ENSG00000164197.11	RNF180	protein_coding	52.4551	-1.13956	0.418122	-2.72544	0.00642166	0.079784
ENSG00000093144.18	ECHDC1	protein_coding	2058.8	0.192601	0.070704	2.72404	0.00644885	0.0800635
ENSG00000144827.8	ABHD10	protein_coding	3310.09	0.162731	0.0597634	2.72292	0.00647074	0.0802183
ENSG00000134697.12	GNL2	protein_coding	5306.48	0.146653	0.0538561	2.72306	0.00646803	0.0802183
ENSG00000240342.3	RPS2P5	processed_pseudogene	9962.78	0.111299	0.0409082	2.72069	0.00651449	0.0807021
ENSG00000146757.13	ZNF92	protein_coding	946.46	0.279161	0.102634	2.71997	0.00652888	0.0808215
ENSG00000119969.14	HELLS	protein_coding	2152.2	0.198718	0.0730678	2.71964	0.00653526	0.0808418
ENSG00000183780.12	SLC35F3	protein_coding	613.123	-0.341297	0.125554	-2.71832	0.00656142	0.0811065
ENSG00000134874.17	DZIP1	protein_coding	915.808	-0.282191	0.103898	-2.71605	0.00660656	0.0816054
ENSG00000101972.18	STAG2	protein_coding	13884.8	0.105747	0.0389405	2.7156	0.00661567	0.0816587
ENSG00000237330.2	RNF223	protein_coding	19.2662	-1.94994	0.718176	-2.71513	0.00662504	0.0817152
ENSG00000186049.8	KRT73	protein_coding	7.66851	3.82994	1.41089	2.71456	0.00663646	0.0817377
ENSG00000176619.12	LMNB2	protein_coding	15371.9	-0.105342	0.038803	-2.71478	0.00663206	0.0817377
ENSG00000164742.15	ADCY1	protein_coding	3392.46	0.160249	0.0590472	2.71391	0.00664942	0.0818383
ENSG00000158106.13	RHPN1	protein_coding	1388.38	0.238193	0.087779	2.71356	0.00665653	0.0818667
ENSG00000167978.16	SRRM2	protein_coding	22648.5	-0.102224	0.0376799	-2.71295	0.00666879	0.0819583
ENSG00000140199.11	SLC12A6	protein_coding	2455.02	-0.192278	0.0708959	-2.71212	0.00668537	0.0821029
ENSG00000110107.8	PRPF19	protein_coding	9705.54	-0.115835	0.0427197	-2.71151	0.00669778	0.0821961
ENSG00000125505.16	MBOAT7	protein_coding	12847.7	-0.103176	0.0380575	-2.71104	0.00670715	0.0822519
ENSG00000167107.12	ACSF2	protein_coding	1081.93	0.257258	0.0949334	2.70988	0.00673073	0.0824817
ENSG00000143294.14	PRCC	protein_coding	3292.25	-0.159571	0.0589066	-2.70888	0.00675103	0.082671
ENSG00000119599.16	DCAF4	protein_coding	4652.69	-0.139409	0.0514758	-2.70825	0.00676396	0.0827699
ENSG00000100473.16	COCH	protein_coding	826.776	0.291008	0.107515	2.70666	0.00679637	0.0828691
ENSG00000168394.11	TAP1	protein_coding	4387.92	0.151729	0.0560561	2.70674	0.00679473	0.0828691
ENSG00000141568.20	FOXK2	protein_coding	7498.35	-0.121277	0.0448013	-2.707	0.00678943	0.0828691
ENSG00000198910.13	L1CAM	protein_coding	1174.71	-0.263447	0.0973296	-2.70675	0.00679452	0.0828691
ENSG00000170006.11	TMEM154	protein_coding	180.212	-0.613733	0.226714	-2.70708	0.00678776	0.0828691
ENSG00000171867.16	PRNP	protein_coding	28029.3	-0.0926821	0.0342527	-2.70584	0.00681325	0.0830155
ENSG00000085721.12	RRN3	protein_coding	3814.73	0.153646	0.0567933	2.70535	0.0068232	0.0830774
ENSG00000000003.14	TSPAN6	protein_coding	3178.34	0.161486	0.059707	2.70465	0.00683773	0.0831355
ENSG00000177606.6	JUN	protein_coding	2034.62	-0.191861	0.0709376	-2.70465	0.00683771	0.0831355
ENSG00000005249.12	PRKAR2B	protein_coding	3652.66	0.154743	0.057232	2.70378	0.00685553	0.0832925
ENSG00000133657.15	ATP13A3	protein_coding	11962.7	0.10933	0.0404838	2.70057	0.00692199	0.0840401
ENSG00000110700.6	RPS13	protein_coding	13117.5	0.121012	0.0448268	2.69954	0.00694361	0.084063
ENSG00000134333.13	LDHA	protein_coding	124841	0.087427	0.0323827	2.69981	0.00693795	0.084063
ENSG00000181649.6	PHLDA2	protein_coding	3363.95	-0.170995	0.0633377	-2.69974	0.00693938	0.084063
ENSG00000231290.5	RP5-907D15.2	processed_transcript	58.9802	-1.07337	0.397602	-2.69962	0.00694193	0.084063
ENSG00000121413.12	ZSCAN18	protein_coding	190.795	0.596426	0.221127	2.69721	0.0069923	0.0845925
ENSG00000106617.13	PRKAG2	protein_coding	2593.96	0.180644	0.0670094	2.6958	0.00702191	0.0848904
ENSG00000183018.8	SPNS2	protein_coding	23.8247	1.71843	0.637589	2.6952	0.00703454	0.0849829
ENSG00000002549.12	LAP3	protein_coding	3009.16	0.167519	0.0621939	2.6935	0.00707064	0.0853584
ENSG00000128016.5	ZFP36	protein_coding	266.848	0.503267	0.186976	2.69162	0.00711062	0.0857197
ENSG00000189079.15	ARID2	protein_coding	1569.22	-0.215266	0.0799733	-2.69172	0.00710852	0.0857197
ENSG00000090487.10	SPG21	protein_coding	4514.78	0.140206	0.0520993	2.69112	0.00712115	0.085786
ENSG00000198171.12	DDRGK1	protein_coding	4428.65	0.152565	0.0567153	2.69002	0.00714471	0.086009
ENSG00000135241.16	PNPLA8	protein_coding	1778.38	0.206798	0.076938	2.68784	0.00719148	0.0865109
ENSG00000090530.9	P3H2	protein_coding	2009.8	0.196961	0.0732863	2.68756	0.0071976	0.0865235
ENSG00000169139.11	UBE2V2	protein_coding	3394.62	0.171085	0.0636848	2.68643	0.00722203	0.086756
ENSG00000162654.8	GBP4	protein_coding	72.7084	-0.948998	0.353481	-2.68472	0.00725901	0.0871388
ENSG00000134897.13	BIVM	protein_coding	1039.97	-0.258606	0.0963455	-2.68416	0.0072713	0.087225
ENSG00000134056.11	MRPS36	protein_coding	704.148	0.314057	0.117055	2.68299	0.00729671	0.0874233
ENSG00000101191.16	DIDO1	protein_coding	10689.7	0.106868	0.0398327	2.68293	0.0072981	0.0874233
ENSG00000127129.9	EDN2	protein_coding	7.69775	3.84986	1.43625	2.6805	0.00735117	0.0878951
ENSG00000120837.7	NFYB	protein_coding	1766.07	0.216152	0.0806294	2.68081	0.00734432	0.0878951
ENSG00000224051.6	CPTP	protein_coding	4707.44	-0.142031	0.0529884	-2.68042	0.00735295	0.0878951
ENSG00000119922.9	IFIT2	protein_coding	880.016	-0.299804	0.111888	-2.67949	0.00737338	0.0880775
ENSG00000111110.11	PPM1H	protein_coding	868.51	-0.290198	0.108383	-2.67753	0.00741674	0.0885334
ENSG00000164031.16	DNAJB14	protein_coding	1892.18	0.199095	0.0744115	2.67559	0.00745969	0.0889839
ENSG00000188848.15	BEND4	protein_coding	11.0663	-2.6967	1.00802	-2.67525	0.00746725	0.0890118
ENSG00000113594.9	LIFR	protein_coding	4717.15	-0.138194	0.0516612	-2.675	0.00747294	0.0890173
ENSG00000078114.18	NEBL	protein_coding	1302.89	0.249725	0.0933698	2.67458	0.00748227	0.0890426
ENSG00000115816.14	CEBPZ	protein_coding	4371.69	0.154655	0.0578273	2.67444	0.00748551	0.0890426
ENSG00000101367.8	MAPRE1	protein_coding	12081	0.102746	0.038443	2.67268	0.00752488	0.0893024
ENSG00000198431.15	TXNRD1	protein_coding	73605.8	-0.0853467	0.0319349	-2.67252	0.00752831	0.0893024
ENSG00000141522.11	ARHGDIA	protein_coding	17589.3	-0.102937	0.0385129	-2.67278	0.00752258	0.0893024
ENSG00000152332.15	UHMK1	protein_coding	9081.26	-0.135349	0.0506412	-2.6727	0.0075243	0.0893024
ENSG00000164983.7	TMEM65	protein_coding	2631.63	0.176156	0.0659319	2.67178	0.00754498	0.0894379
ENSG00000125726.10	CD70	protein_coding	502.389	-0.365262	0.136727	-2.67147	0.00755194	0.0894582
ENSG00000179889.18	PDXDC1	protein_coding	5734.12	0.128203	0.0479968	2.67106	0.0075611	0.0895045
ENSG00000198300.12	PEG3	protein_coding	586.493	0.333505	0.124928	2.66958	0.00759465	0.0898393
ENSG00000171858.17	RPS21	protein_coding	33833.2	0.222207	0.0832587	2.66887	0.00761071	0.0899668
ENSG00000005007.12	UPF1	protein_coding	12690	-0.106753	0.0400089	-2.66824	0.00762493	0.0900724
ENSG00000182220.14	ATP6AP2	protein_coding	5755.03	0.128264	0.0481229	2.66535	0.00769077	0.0907245
ENSG00000068654.15	POLR1A	protein_coding	7902.02	-0.1149	0.043107	-2.66546	0.0076884	0.0907245
ENSG00000165300.7	SLITRK5	protein_coding	86.4668	-0.865989	0.325109	-2.66369	0.00772892	0.0911114
ENSG00000085063.15	CD59	protein_coding	19811.4	0.0925234	0.0347392	2.66337	0.00773614	0.0911336
ENSG00000147144.12	CCDC120	protein_coding	363.853	-0.433592	0.162846	-2.66259	0.00775418	0.091283
ENSG00000124507.10	PACSIN1	protein_coding	125.446	-0.715699	0.26883	-2.66227	0.00776154	0.0913066
ENSG00000181163.13	NPM1	protein_coding	86461.7	0.203344	0.0763892	2.66195	0.00776901	0.0913314
ENSG00000122218.14	COPA	protein_coding	14438	-0.100113	0.0376194	-2.66121	0.00778606	0.0914673
ENSG00000123143.12	PKN1	protein_coding	11034.6	-0.126449	0.0475196	-2.66098	0.0077913	0.0914673
ENSG00000178826.10	TMEM139	protein_coding	85.9216	-0.861547	0.323859	-2.66025	0.00780817	0.0916023
ENSG00000131591.17	C1orf159	protein_coding	1491.82	-0.225889	0.0849326	-2.65962	0.00782281	0.0917109
ENSG00000171435.13	KSR2	protein_coding	73.5663	-0.949988	0.357307	-2.65874	0.00784326	0.0918875
ENSG00000023041.11	ZDHHC6	protein_coding	1360.63	0.228982	0.0862031	2.65631	0.00790014	0.0922369
ENSG00000125870.10	SNRPB2	protein_coding	5109.62	0.138328	0.0520656	2.65681	0.00788829	0.0922369
ENSG00000204628.11	RACK1	protein_coding	52153.1	0.0833704	0.031375	2.65723	0.00787868	0.0922369
ENSG00000125817.7	CENPB	protein_coding	13028.9	-0.116941	0.0440206	-2.6565	0.00789573	0.0922369
ENSG00000101307.15	SIRPB1	protein_coding	249.049	-0.50354	0.189535	-2.65671	0.00789075	0.0922369
ENSG00000047346.12	KIAA1370	protein_coding	698.169	0.313948	0.118227	2.65548	0.00791957	0.0924005
ENSG00000185753.12	CXorf38	protein_coding	965.728	-0.265592	0.100032	-2.65508	0.007929	0.0924471
ENSG00000136002.18	ARHGEF4	protein_coding	599.506	-0.338131	0.127422	-2.65364	0.00796282	0.0927781
ENSG00000151247.12	EIF4E	protein_coding	3372.18	0.161677	0.0609318	2.6534	0.00796843	0.09278
ENSG00000012660.13	ELOVL5	protein_coding	10958.1	0.108609	0.0409405	2.65285	0.0079816	0.0928698
ENSG00000109790.16	KLHL5	protein_coding	12385.7	0.10431	0.039327	2.65237	0.00799295	0.0929385
ENSG00000151498.11	ACAD8	protein_coding	1706.13	0.204172	0.076992	2.65185	0.0080051	0.0930163
ENSG00000135047.14	CTSL	protein_coding	2761.67	0.186902	0.0706303	2.6462	0.00814007	0.0945202
ENSG00000109180.14	OCIAD1	protein_coding	3932.36	0.148412	0.0560958	2.64569	0.00815253	0.0946004
ENSG00000132970.12	WASF3	protein_coding	934.506	-0.2672	0.101004	-2.64545	0.00815813	0.094601
ENSG00000104881.15	PPP1R13L	protein_coding	743.891	-0.297196	0.112375	-2.64469	0.00817653	0.0947499
ENSG00000010818.9	HIVEP2	protein_coding	5337.57	-0.130082	0.0491976	-2.64407	0.00819159	0.0948599
ENSG00000175662.17	TOM1L2	protein_coding	2139.83	-0.18626	0.0704632	-2.64337	0.0082085	0.0949912
ENSG00000153130.17	SCOC	protein_coding	3426.2	0.157598	0.059642	2.64239	0.00823225	0.0951993
ENSG00000198682.12	PAPSS2	protein_coding	3527.19	-0.150155	0.05683	-2.64217	0.00823764	0.0951993
ENSG00000196531.10	NACA	protein_coding	14168.6	0.123821	0.0468814	2.64115	0.00826246	0.0954214
ENSG00000134375.10	TIMM17A	protein_coding	2651.9	0.19574	0.0741696	2.63909	0.00831291	0.095939
ENSG00000117525.13	F3	protein_coding	308.573	0.457059	0.173294	2.63747	0.00835265	0.0963324
ENSG00000114423.19	CBLB	protein_coding	985.868	-0.2587	0.0981025	-2.63704	0.00836334	0.0963904
ENSG00000183340.6	JRKL	protein_coding	961.059	0.264604	0.100371	2.63626	0.00838247	0.0965457
ENSG00000197043.13	ANXA6	protein_coding	11025.7	-0.105909	0.0402077	-2.63405	0.00843737	0.0971124
ENSG00000147403.16	RPL10	protein_coding	65177.5	0.0786082	0.0298597	2.63258	0.00847379	0.0974657
ENSG00000182256.12	GABRG3	protein_coding	6.85621	4.71923	1.79296	2.6321	0.00848599	0.0975403
ENSG00000162231.13	NXF1	protein_coding	3065.06	0.157919	0.0600392	2.63026	0.00853188	0.0979356
ENSG00000041880.14	PARP3	protein_coding	666.34	-0.319965	0.121647	-2.63027	0.00853168	0.0979356
ENSG00000285508.1	RP5-931K24.3	protein_coding	413.932	0.89838	0.341891	2.62768	0.00859689	0.0986154
ENSG00000072840.12	EVC	protein_coding	861.182	-0.279422	0.106361	-2.62712	0.00861106	0.0987116
ENSG00000156103.15	MMP16	protein_coding	2257.32	0.186165	0.0708937	2.62597	0.00864019	0.098979
ENSG00000033800.13	PIAS1	protein_coding	1804.01	0.195976	0.0747081	2.62323	0.00871007	0.0996176
ENSG00000153944.10	MSI2	protein_coding	5184.53	0.140278	0.053478	2.6231	0.00871348	0.0996176
ENSG00000234745.10	HLA-B	protein_coding	2713.64	-0.16679	0.0635812	-2.62326	0.0087092	0.0996176
ENSG00000109861.15	CTSC	protein_coding	17008.5	0.096566	0.0368293	2.62199	0.00874186	0.0997832
ENSG00000152818.18	UTRN	protein_coding	5800.97	-0.124575	0.0475183	-2.62162	0.00875137	0.0997832
ENSG00000149091.15	DGKZ	protein_coding	5649.82	-0.137823	0.0525692	-2.62175	0.00874805	0.0997832
ENSG00000198853.11	RUSC2	protein_coding	695.291	-0.301865	0.115135	-2.62183	0.00874578	0.0997832
ENSG00000086712.12	TXLNG	protein_coding	4723.04	0.135224	0.0515963	2.62081	0.00877202	0.099885
ENSG00000097007.17	ABL1	protein_coding	3431.07	-0.156784	0.05982	-2.62093	0.00876915	0.099885
ENSG00000270647.5	TAF15	protein_coding	8339.94	0.12916	0.0492881	2.6205	0.00877998	0.0999089
ENSG00000030582.17	GRN	protein_coding	19226.4	-0.0959563	0.0366444	-2.61858	0.00882967	0.100407
ENSG00000076043.9	REXO2	protein_coding	4847.18	0.147026	0.0561829	2.61692	0.00887279	0.10083
ENSG00000130935.9	NOL11	protein_coding	6902.29	0.126437	0.0483335	2.61592	0.00889872	0.101024
ENSG00000145555.14	MYO10	protein_coding	8283.78	-0.113729	0.0434776	-2.61581	0.00890166	0.101024
ENSG00000140157.14	NIPA2	protein_coding	9696.12	0.111584	0.0426709	2.61499	0.00892299	0.101187
ENSG00000090006.17	LTBP4	protein_coding	1678.14	-0.212039	0.0810917	-2.6148	0.00892796	0.101187
ENSG00000111144.9	LTA4H	protein_coding	4223.35	0.145404	0.055615	2.61447	0.00893648	0.101217
ENSG00000196639.6	HRH1	protein_coding	871.25	-0.283714	0.108527	-2.61423	0.0089429	0.101222
ENSG00000196205.8	EEF1A1P5	processed_pseudogene	1863.58	-0.210701	0.0806429	-2.61277	0.0089812	0.101588
ENSG00000126777.17	KTN1	protein_coding	31349.4	0.117189	0.0448699	2.61175	0.00900804	0.101824
ENSG00000116161.17	CACYBP	protein_coding	3726.98	0.150734	0.0577196	2.61149	0.00901485	0.101834
ENSG00000171503.11	ETFDH	protein_coding	1083.22	0.249666	0.0956606	2.60991	0.00905653	0.102169
ENSG00000117899.10	MESDC2	protein_coding	2764.49	0.165245	0.0633114	2.61004	0.00905322	0.102169
ENSG00000150093.18	ITGB1	protein_coding	105105	0.0831854	0.0318768	2.60959	0.00906515	0.102199
ENSG00000033327.12	GAB2	protein_coding	343.437	-0.457012	0.175172	-2.60893	0.00908247	0.102326
ENSG00000081059.19	TCF7	protein_coding	589.432	-0.337129	0.129275	-2.60785	0.00911142	0.102585
ENSG00000114491.13	UMPS	protein_coding	1393.82	0.221169	0.0849179	2.60451	0.00920065	0.103453
ENSG00000149547.14	EI24	protein_coding	13619.6	0.103198	0.0396212	2.60462	0.00919749	0.103453
ENSG00000164414.17	SLC35A1	protein_coding	918.497	0.266129	0.102278	2.60202	0.00926767	0.104116
ENSG00000142409.5	ZNF787	protein_coding	3786.89	-0.148884	0.0572221	-2.60186	0.00927188	0.104116
ENSG00000008441.16	NFIX	protein_coding	16567.8	-0.0948455	0.0364613	-2.60126	0.0092881	0.104161
ENSG00000145934.16	TENM2	protein_coding	27.0651	-1.53457	0.589894	-2.60144	0.00928345	0.104161
ENSG00000132359.14	RAP1GAP2	protein_coding	1197.07	-0.233927	0.0899467	-2.60073	0.00930258	0.104255
ENSG00000015479.18	MATR3	protein_coding	15433.7	0.110191	0.0423788	2.60013	0.00931877	0.104346
ENSG00000120438.11	TCP1	protein_coding	15629	0.0977727	0.0376052	2.59998	0.00932292	0.104346
ENSG00000136527.17	TRA2B	protein_coding	10188.1	0.115166	0.0443181	2.59862	0.00936	0.104692
ENSG00000205002.3	AARD	protein_coding	247.807	-0.496217	0.191069	-2.59705	0.00940279	0.105102
ENSG00000170396.7	ZNF804A	protein_coding	233.772	-0.509202	0.196096	-2.5967	0.00941241	0.10514
ENSG00000134779.14	TPGS2	protein_coding	2919.07	-0.161777	0.0623526	-2.59456	0.00947127	0.105728
ENSG00000154822.17	PLCL2	protein_coding	836.22	-0.274734	0.105933	-2.59348	0.00950113	0.105992
ENSG00000205364.3	MT1M	protein_coding	13.3761	2.28952	0.883132	2.5925	0.00952802	0.106223
ENSG00000186854.10	TRABD2A	protein_coding	210.044	-0.536636	0.207211	-2.5898	0.00960323	0.106991
ENSG00000130052.13	STARD8	protein_coding	46.8731	1.19174	0.460223	2.58949	0.00961184	0.107017
ENSG00000130396.20	MLLT4	protein_coding	1009.26	-0.27452	0.106109	-2.58714	0.00967753	0.107678
ENSG00000128708.12	HAT1	protein_coding	4398.53	0.147594	0.0570604	2.58663	0.00969192	0.107768
ENSG00000184916.8	JAG2	protein_coding	1522.76	0.212349	0.0821111	2.58612	0.00970625	0.107787
ENSG00000100784.10	RPS6KA5	protein_coding	738.658	-0.301873	0.116721	-2.58628	0.00970179	0.107787
ENSG00000117598.11	PLPPR5	protein_coding	161.038	-0.612911	0.237133	-2.58467	0.00974709	0.10817
ENSG00000196159.11	FAT4	protein_coding	61.8789	-1.00166	0.387708	-2.58355	0.0097788	0.108451
ENSG00000241852.9	C8orf58	protein_coding	844.037	0.276845	0.1072	2.58251	0.00980844	0.108709
ENSG00000170348.8	TMED10	protein_coding	11498.6	0.102591	0.0397418	2.58143	0.00983931	0.10898
ENSG00000008988.9	RPS20	protein_coding	8686.23	0.120104	0.0465435	2.58047	0.00986649	0.109211
ENSG00000198832.10	RP3-412A9.11	protein_coding	1069.37	0.247199	0.0958094	2.58011	0.00987692	0.109255
ENSG00000132646.10	PCNA	protein_coding	11335.2	0.107541	0.0417011	2.57887	0.00991255	0.109578
ENSG00000168056.15	LTBP3	protein_coding	6095.41	-0.141893	0.0550284	-2.57854	0.0099219	0.10961
ENSG00000130723.19	PRRC2B	protein_coding	9019.52	-0.10857	0.042123	-2.57745	0.00995321	0.109885
ENSG00000124486.12	USP9X	protein_coding	10796.9	-0.109993	0.0426805	-2.57713	0.0099625	0.109895
ENSG00000011201.11	ANOS1	protein_coding	58.986	-1.01725	0.394746	-2.57697	0.00996702	0.109895
ENSG00000185634.11	SHC4	protein_coding	1851.63	0.191071	0.0741929	2.57533	0.0100144	0.110275
ENSG00000030110.12	BAK1	protein_coding	2047.35	-0.182084	0.070701	-2.57541	0.0100122	0.110275
ENSG00000088826.17	SMOX	protein_coding	7598.31	-0.114477	0.0444575	-2.57497	0.0100248	0.110318
ENSG00000139211.6	AMIGO2	protein_coding	737.901	-0.291988	0.113459	-2.57351	0.0100674	0.110715
ENSG00000258926.1	RP11-47I22.1	antisense	6.48985	4.6221	1.79743	2.57151	0.0101257	0.111284
ENSG00000101695.8	RNF125	protein_coding	762.604	0.306043	0.119038	2.57098	0.0101412	0.111384
ENSG00000070785.16	EIF2B3	protein_coding	2297.41	0.178185	0.0693328	2.57	0.0101699	0.111627
ENSG00000157800.17	SLC37A3	protein_coding	4893.81	0.135371	0.0527031	2.56855	0.0102125	0.112022
ENSG00000161547.16	SRSF2	protein_coding	16097.3	0.0959176	0.0373676	2.56687	0.0102622	0.112495
ENSG00000136942.14	RPL35	protein_coding	10317.5	0.107506	0.0418998	2.56579	0.0102942	0.112773
ENSG00000169228.13	RAB24	protein_coding	1705.57	0.21515	0.0838801	2.56497	0.0103184	0.112965
ENSG00000244687.11	UBE2V1	protein_coding	20350.7	0.0962048	0.0375258	2.5637	0.0103564	0.113309
ENSG00000069998.12	CECR5	protein_coding	2482.37	0.17322	0.0675781	2.56326	0.0103693	0.113378
ENSG00000053524.12	MCF2L2	protein_coding	265.084	0.479319	0.187046	2.56258	0.0103899	0.113503
ENSG00000008952.16	SEC62	protein_coding	7213.92	0.119868	0.0467789	2.56243	0.0103941	0.113503
ENSG00000081870.11	HSPB11	protein_coding	1270.79	0.25487	0.0995864	2.55929	0.0104887	0.114463
ENSG00000197122.11	SRC	protein_coding	5566.24	-0.135702	0.0530292	-2.55901	0.010497	0.11448
ENSG00000137959.15	IFI44L	protein_coding	617.174	0.328918	0.12861	2.55747	0.0105436	0.114841
ENSG00000131507.10	NDFIP1	protein_coding	5458.34	0.126217	0.0493513	2.55753	0.0105418	0.114841
ENSG00000181555.20	SETD2	protein_coding	5547.36	-0.13218	0.0517118	-2.55608	0.0105858	0.115016
ENSG00000178531.5	CTXN1	protein_coding	1542.07	-0.224903	0.0879882	-2.55605	0.0105867	0.115016
ENSG00000168016.14	TRANK1	protein_coding	150.238	-0.627897	0.245611	-2.55647	0.010574	0.115016
ENSG00000145945.5	FAM50B	protein_coding	99.3405	-0.799123	0.312616	-2.55624	0.0105809	0.115016
ENSG00000124172.9	ATP5E	protein_coding	5159.51	0.171785	0.0672336	2.55504	0.0106175	0.115141
ENSG00000189043.9	NDUFA4	protein_coding	7079.02	0.141641	0.0554398	2.55486	0.010623	0.115141
ENSG00000125977.6	EIF2S2	protein_coding	13680.3	0.122153	0.0478134	2.55479	0.0106252	0.115141
ENSG00000162777.16	DENND2D	protein_coding	32.5855	-1.35669	0.530998	-2.55498	0.0106193	0.115141
ENSG00000085760.14	MTIF2	protein_coding	3775.82	0.164263	0.0643425	2.55294	0.0106818	0.115681
ENSG00000114999.7	TTL	protein_coding	6168.69	-0.121743	0.0476993	-2.5523	0.0107013	0.115819
ENSG00000167535.7	CACNB3	protein_coding	876.1	-0.268137	0.105118	-2.55082	0.0107468	0.116238
ENSG00000196821.9	C6orf106	protein_coding	8834.04	-0.107004	0.0419672	-2.54971	0.0107812	0.116536
ENSG00000164244.20	PRRC1	protein_coding	6299.67	0.131137	0.0514471	2.54897	0.0108041	0.116709
ENSG00000111816.7	FRK	protein_coding	61.4923	0.979956	0.38455	2.54832	0.0108244	0.116854
ENSG00000123975.4	CKS2	protein_coding	2309.81	0.173809	0.0682605	2.54626	0.0108885	0.117398
ENSG00000163931.15	TKT	protein_coding	17850.4	-0.095106	0.037349	-2.54641	0.0108836	0.117398
ENSG00000075420.12	FNDC3B	protein_coding	7166.71	0.126195	0.0495744	2.54557	0.0109099	0.117554
ENSG00000079215.13	SLC1A3	protein_coding	498.308	0.343846	0.135115	2.54484	0.0109328	0.117726
ENSG00000168938.5	PPIC	protein_coding	576.478	0.327151	0.128689	2.54219	0.011016	0.118547
ENSG00000166821.8	PEX11A	protein_coding	710.311	0.304649	0.119886	2.54115	0.0110489	0.118826
ENSG00000096093.15	EFHC1	protein_coding	839.393	0.273818	0.107796	2.54015	0.0110804	0.119015
ENSG00000174173.6	TRMT10C	protein_coding	2595.29	0.175688	0.0691598	2.54031	0.0110753	0.119015
ENSG00000145247.11	OCIAD2	protein_coding	1344.62	-0.219978	0.0866212	-2.53954	0.0110999	0.119149
ENSG00000152601.17	MBNL1	protein_coding	14825	0.105189	0.0414697	2.53652	0.0111959	0.119985
ENSG00000166833.19	NAV2	protein_coding	2156.51	-0.179773	0.0708762	-2.53643	0.0111989	0.119985
ENSG00000182107.6	TMEM30B	protein_coding	417.658	-0.380043	0.149823	-2.53661	0.0111932	0.119985
ENSG00000166598.14	HSP90B1	protein_coding	60346.8	0.0845706	0.0333492	2.53591	0.0112154	0.120087
ENSG00000280623.1	PCAT14	lincRNA	19.1462	1.79615	0.708621	2.53471	0.0112542	0.120275
ENSG00000137776.16	SLTM	protein_coding	4718.04	0.141808	0.0559374	2.53512	0.011241	0.120275
ENSG00000076513.16	ANKRD13A	protein_coding	3980.37	-0.138218	0.0545277	-2.53481	0.0112507	0.120275
ENSG00000215251.3	FASTKD5	protein_coding	2578.42	0.175782	0.0693955	2.53305	0.0113075	0.120769
ENSG00000182287.14	AP1S2	protein_coding	4668.14	0.137442	0.0542743	2.53235	0.01133	0.120915
ENSG00000110046.12	ATG2A	protein_coding	2611.11	-0.163744	0.0646651	-2.53219	0.0113354	0.120915
ENSG00000155959.10	VBP1	protein_coding	4451.01	0.144202	0.056957	2.53177	0.0113488	0.120983
ENSG00000175265.17	GOLGA8A	protein_coding	2969.93	0.185444	0.0732536	2.53154	0.0113564	0.120989
ENSG00000121039.9	RDH10	protein_coding	7631.1	0.119747	0.0473232	2.53041	0.0113929	0.121261
ENSG00000171843.15	MLLT3	protein_coding	281.534	-0.47577	0.188032	-2.53027	0.0113976	0.121261
ENSG00000184574.9	LPAR5	protein_coding	127.587	-0.677179	0.26765	-2.53009	0.0114034	0.121261
ENSG00000130768.14	SMPDL3B	protein_coding	114.454	-0.738224	0.291939	-2.5287	0.0114487	0.121668
ENSG00000100938.17	GMPR2	protein_coding	2287.23	0.171771	0.0679576	2.52762	0.0114838	0.121964
ENSG00000117862.11	TXNDC12	protein_coding	4485.98	0.138558	0.0548334	2.5269	0.0115075	0.12214
ENSG00000204682.5	CASC10	protein_coding	468.633	0.351677	0.13926	2.52533	0.0115591	0.122488
ENSG00000066777.8	ARFGEF1	protein_coding	4553.99	-0.139408	0.0552071	-2.52518	0.0115639	0.122488
ENSG00000116604.17	MEF2D	protein_coding	2037.57	-0.185675	0.0735221	-2.52544	0.0115555	0.122488
ENSG00000143842.14	SOX13	protein_coding	1706.54	-0.195409	0.0773889	-2.52502	0.011569	0.122488
ENSG00000125534.9	PPDPF	protein_coding	6547.71	-0.116786	0.0462599	-2.52457	0.0115841	0.122572
ENSG00000254535.3	PABPC4L	protein_coding	150.458	-0.614155	0.243328	-2.52398	0.0116034	0.1227
ENSG00000103512.14	NOMO1	protein_coding	14130.7	0.0953915	0.037803	2.52339	0.011623	0.122831
ENSG00000065485.19	PDIA5	protein_coding	3148.72	0.155415	0.061605	2.52277	0.0116434	0.12297
ENSG00000110427.15	KIAA1549L	protein_coding	2796.1	-0.164117	0.0650693	-2.52219	0.0116626	0.123096
ENSG00000158856.18	DMTN	protein_coding	476.781	-0.376624	0.149368	-2.52145	0.0116873	0.123281
ENSG00000173145.11	NOC3L	protein_coding	2977.68	0.162406	0.0644356	2.52043	0.0117211	0.123561
ENSG00000162599.15	NFIA	protein_coding	616.135	0.315197	0.125104	2.51948	0.0117528	0.123742
ENSG00000116117.17	PARD3B	protein_coding	108.302	-0.723204	0.287044	-2.51949	0.0117526	0.123742
ENSG00000102755.11	FLT1	protein_coding	268.104	-0.459469	0.182448	-2.51836	0.0117902	0.124059
ENSG00000147872.9	PLIN2	protein_coding	1988.94	0.182539	0.0725103	2.51743	0.0118216	0.124313
ENSG00000144677.14	CTDSPL	protein_coding	1377.74	0.214952	0.085437	2.51591	0.0118726	0.124772
ENSG00000186442.7	KRT3	protein_coding	237.048	0.495945	0.197233	2.51452	0.0119195	0.125111
ENSG00000163694.14	RBM47	protein_coding	120.236	-0.686526	0.273005	-2.5147	0.0119134	0.125111
ENSG00000148481.13	FAM188A	protein_coding	2274.2	0.171668	0.0683284	2.5124	0.0119912	0.125786
ENSG00000171055.14	FEZ2	protein_coding	5274.33	0.131861	0.0525219	2.51058	0.0120533	0.12636
ENSG00000086504.15	MRPL28	protein_coding	2972.94	0.164345	0.0655573	2.50688	0.01218	0.127453
ENSG00000137076.20	TLN1	protein_coding	15567.1	-0.0955001	0.0380903	-2.5072	0.0121691	0.127453
ENSG00000203499.11	RP11-429J17.8	protein_coding	310.461	-0.432382	0.172469	-2.50701	0.0121758	0.127453
ENSG00000213096.10	ZNF254	protein_coding	1051.32	0.240345	0.095922	2.50563	0.0122233	0.127744
ENSG00000118257.16	NRP2	protein_coding	287.455	-0.450657	0.179872	-2.50543	0.0122303	0.127744
ENSG00000072163.19	LIMS2	protein_coding	132.758	-0.659057	0.263021	-2.50572	0.0122201	0.127744
ENSG00000106591.3	MRPL32	protein_coding	2630.02	0.177901	0.0710221	2.50487	0.0122497	0.127868
ENSG00000058668.14	ATP2B4	protein_coding	2367.83	-0.167214	0.0667762	-2.50409	0.0122765	0.12807
ENSG00000221988.12	PPT2	protein_coding	2205.03	0.172927	0.0690801	2.50328	0.0123048	0.128286
ENSG00000144028.14	SNRNP200	protein_coding	22848	-0.0856454	0.0342308	-2.502	0.0123494	0.128672
ENSG00000100744.14	GSKIP	protein_coding	1790.78	0.191066	0.0764055	2.50068	0.0123956	0.129075
ENSG00000231298.6	RP11-117P22.1	lincRNA	140.081	-0.630069	0.252092	-2.49936	0.0124417	0.129476
ENSG00000244005.12	NFS1	protein_coding	3454.67	0.144594	0.057894	2.49756	0.0125051	0.130042
ENSG00000173598.13	NUDT4	protein_coding	6263.78	0.118377	0.0474006	2.49738	0.0125113	0.130042
ENSG00000135698.9	MPHOSPH6	protein_coding	1297.13	0.218585	0.0875546	2.49655	0.0125407	0.130267
ENSG00000198648.10	STK39	protein_coding	4010.35	0.13907	0.0557214	2.49581	0.0125671	0.130383
ENSG00000110880.10	CORO1C	protein_coding	15293.9	-0.0938236	0.0375906	-2.49593	0.0125626	0.130383
ENSG00000183840.6	GPR39	protein_coding	1018.04	-0.241846	0.0969359	-2.49491	0.0125989	0.130634
ENSG00000102362.15	SYTL4	protein_coding	251.533	0.471752	0.189128	2.49435	0.0126188	0.13076
ENSG00000116574.5	RHOU	protein_coding	314.034	0.432824	0.173611	2.49306	0.0126646	0.131155
ENSG00000114098.17	ARMC8	protein_coding	1341.39	0.212475	0.0852648	2.49194	0.0127046	0.131489
ENSG00000100401.19	RANGAP1	protein_coding	9432.8	-0.108188	0.0434219	-2.49155	0.0127186	0.131554
ENSG00000076356.6	PLXNA2	protein_coding	356.804	0.396749	0.159304	2.49051	0.0127561	0.131862
ENSG00000144369.12	FAM171B	protein_coding	315.137	-0.420493	0.168944	-2.48895	0.012812	0.132359
ENSG00000125356.6	NDUFA1	protein_coding	2520.8	0.193374	0.0777455	2.48727	0.0128727	0.132704
ENSG00000008294.20	SPAG9	protein_coding	17041.8	-0.0928103	0.0373157	-2.48717	0.0128765	0.132704
ENSG00000196923.13	PDLIM7	protein_coding	3099.63	-0.162483	0.0653177	-2.48758	0.0128615	0.132704
ENSG00000267120.3	AD000671.6	protein_coding	6.79081	-3.68493	1.4813	-2.48764	0.0128593	0.132704
ENSG00000115368.9	WDR75	protein_coding	4782.06	0.150215	0.0604025	2.48689	0.0128864	0.132726
ENSG00000149554.12	CHEK1	protein_coding	4020.06	0.139376	0.0560605	2.48618	0.0129124	0.132913
ENSG00000261221.3	ZNF865	protein_coding	1861.82	-0.195681	0.0787439	-2.48503	0.012954	0.133261
ENSG00000069869.15	NEDD4	protein_coding	1957	0.180548	0.0726872	2.4839	0.0129952	0.133605
ENSG00000171208.9	NETO2	protein_coding	2887.59	0.15945	0.0642001	2.48364	0.0130047	0.133622
ENSG00000138758.11	SEPT11	protein_coding	6522.24	0.123115	0.0495866	2.48283	0.0130342	0.133844
ENSG00000241343.9	RPL36A	protein_coding	13174.2	0.235521	0.0949345	2.48087	0.013106	0.134501
ENSG00000188612.11	SUMO2	protein_coding	15978.9	0.105693	0.0426434	2.47854	0.0131922	0.135304
ENSG00000168447.10	SCNN1B	protein_coding	66.2928	0.923732	0.372745	2.47819	0.0132052	0.135325
ENSG00000184787.18	UBE2G2	protein_coding	8187.2	-0.113396	0.0457601	-2.47805	0.0132102	0.135325
ENSG00000132003.9	ZSWIM4	protein_coding	853.794	-0.26006	0.104956	-2.4778	0.0132194	0.135338
ENSG00000183741.11	CBX6	protein_coding	5272.25	0.124367	0.0502006	2.4774	0.0132344	0.13541
ENSG00000144712.11	CAND2	protein_coding	175.028	-0.558166	0.225356	-2.47682	0.013256	0.13555
ENSG00000185046.18	ANKS1B	protein_coding	86.1434	0.80845	0.326969	2.47256	0.013415	0.137011
ENSG00000025039.14	RRAGD	protein_coding	285.479	0.458984	0.185626	2.47262	0.0134125	0.137011
ENSG00000111666.10	CHPT1	protein_coding	2904.73	0.15804	0.0639394	2.47171	0.0134469	0.137255
ENSG00000112977.15	DAP	protein_coding	18049.6	-0.0951715	0.0385099	-2.47135	0.0134603	0.137309
ENSG00000138495.6	COX17	protein_coding	937.709	0.263973	0.106879	2.46983	0.0135178	0.137814
ENSG00000126216.13	TUBGCP3	protein_coding	2480.22	-0.164507	0.0666407	-2.46856	0.0135659	0.138139
ENSG00000181381.13	DDX60L	protein_coding	915.527	-0.25114	0.101728	-2.46874	0.013559	0.138139
ENSG00000133065.10	SLC41A1	protein_coding	3419.33	0.146056	0.0591843	2.46782	0.013594	0.138343
ENSG00000074695.5	LMAN1	protein_coding	28172.1	0.0889815	0.0360822	2.46607	0.0136603	0.138934
ENSG00000110888.17	CAPRIN2	protein_coding	1624.66	0.198165	0.0803996	2.46475	0.013711	0.139367
ENSG00000111348.8	ARHGDIB	protein_coding	72.2357	-0.881208	0.357611	-2.46415	0.0137339	0.139516
ENSG00000144681.10	STAC	protein_coding	215.404	-0.501173	0.203405	-2.46392	0.0137427	0.139523
ENSG00000080493.15	SLC4A4	protein_coding	127.04	0.662671	0.269028	2.46321	0.01377	0.139633
ENSG00000164684.13	ZNF704	protein_coding	96.9423	-0.747573	0.303475	-2.46338	0.0137634	0.139633
ENSG00000069424.14	KCNAB2	protein_coding	658.313	-0.299037	0.121483	-2.46155	0.0138339	0.140198
ENSG00000160124.9	CCDC58	protein_coding	1478.23	0.207496	0.084321	2.46078	0.0138635	0.140353
ENSG00000135940.6	COX5B	protein_coding	4681.3	0.146871	0.0596902	2.46056	0.0138721	0.140353
ENSG00000109685.17	NSD2	protein_coding	7813.05	-0.111445	0.0452935	-2.46051	0.0138739	0.140353
ENSG00000076053.10	RBM7	protein_coding	3003.38	0.15105	0.0614222	2.45921	0.0139242	0.140778
ENSG00000232956.8	SNHG15	lincRNA	888.269	0.260715	0.106041	2.45864	0.0139465	0.14092
ENSG00000144136.10	SLC20A1	protein_coding	19445.3	-0.0916465	0.0372944	-2.45738	0.0139954	0.14133
ENSG00000165672.6	PRDX3	protein_coding	6446.84	0.113901	0.046355	2.45715	0.0140043	0.141337
ENSG00000178585.14	CTNNBIP1	protein_coding	1844.38	-0.184033	0.0749116	-2.45667	0.0140233	0.141445
ENSG00000248383.4	PCDHAC1	protein_coding	297.381	-0.455419	0.185397	-2.45645	0.0140316	0.141445
ENSG00000105185.11	PDCD5	protein_coding	2507.97	0.177501	0.0722749	2.45591	0.014053	0.141576
ENSG00000145147.19	SLIT2	protein_coding	8067.05	-0.118291	0.0481715	-2.45563	0.0140639	0.141601
ENSG00000157500.10	APPL1	protein_coding	4840.09	-0.124477	0.0506947	-2.45542	0.0140721	0.141601
ENSG00000165480.15	SKA3	protein_coding	2072.85	-0.185139	0.0754297	-2.45446	0.0141098	0.141897
ENSG00000161267.11	BDH1	protein_coding	505.589	-0.332702	0.135656	-2.45254	0.0141853	0.142572
ENSG00000103035.10	PSMD7	protein_coding	4493.04	0.136721	0.0557613	2.45191	0.0142101	0.142738
ENSG00000184160.7	ADRA2C	protein_coding	70.0176	0.879004	0.358703	2.4505	0.0142656	0.143126
ENSG00000131016.16	AKAP12	protein_coding	7694.17	-0.117971	0.0481403	-2.45057	0.0142629	0.143126
ENSG00000151789.10	ZNF385D	protein_coding	168.52	-0.562443	0.229732	-2.44826	0.0143547	0.143935
ENSG00000070047.11	PHRF1	protein_coding	4855.99	-0.125092	0.0510998	-2.44799	0.0143657	0.143961
ENSG00000204304.11	PBX2	protein_coding	4865.18	0.130113	0.0531677	2.44722	0.0143962	0.144182
ENSG00000112685.13	EXOC2	protein_coding	2812.65	-0.152685	0.0624013	-2.44683	0.014412	0.144256
ENSG00000146729.9	GBAS	protein_coding	8842.39	0.105988	0.0433222	2.44652	0.0144245	0.144295
ENSG00000066322.14	ELOVL1	protein_coding	6109.83	0.115931	0.0473975	2.44593	0.0144478	0.144444
ENSG00000196843.15	ARID5A	protein_coding	297.881	-0.431789	0.176559	-2.44558	0.0144618	0.144499
ENSG00000116489.12	CAPZA1	protein_coding	15132.4	0.098613	0.0403357	2.44481	0.014493	0.144726
ENSG00000175470.18	PPP2R2D	protein_coding	1508.07	-0.205782	0.0841822	-2.44448	0.014506	0.144771
ENSG00000148926.9	ADM	protein_coding	374.561	0.401603	0.164362	2.44341	0.0145491	0.145117
ENSG00000165410.14	CFL2	protein_coding	6823.96	0.112513	0.0460717	2.44214	0.0146006	0.145545
ENSG00000170581.13	STAT2	protein_coding	1228.82	-0.216753	0.0887962	-2.44102	0.0146459	0.145911
ENSG00000154856.12	APCDD1	protein_coding	123.939	0.659336	0.270292	2.43935	0.0147138	0.146284
ENSG00000163597.14	SNHG16	processed_transcript	10278.8	0.111587	0.0457466	2.43925	0.0147176	0.146284
ENSG00000160710.15	ADAR	protein_coding	14992	-0.0908498	0.037244	-2.43931	0.0147153	0.146284
ENSG00000031081.10	ARHGAP31	protein_coding	1920.63	-0.177887	0.072925	-2.43931	0.0147152	0.146284
ENSG00000274012.1	RN7SL2	misc_RNA	8156.12	0.310709	0.127402	2.43882	0.0147353	0.146374
ENSG00000104998.3	IL27RA	protein_coding	1972.63	-0.178605	0.0732544	-2.43815	0.0147626	0.14656
ENSG00000091129.19	NRCAM	protein_coding	6.66337	3.6288	1.48857	2.43777	0.0147781	0.146628
ENSG00000130340.15	SNX9	protein_coding	2089.97	-0.171004	0.0702808	-2.43315	0.0149681	0.148386
ENSG00000180340.6	FZD2	protein_coding	1043.95	-0.237153	0.0974718	-2.43304	0.0149726	0.148386
ENSG00000140443.13	IGF1R	protein_coding	2110.42	0.170843	0.0702611	2.43155	0.0150344	0.148911
ENSG00000114021.11	NIT2	protein_coding	2392.32	0.163698	0.0673564	2.43033	0.015085	0.149326
ENSG00000145782.12	ATG12	protein_coding	4409.67	0.131432	0.0541174	2.42865	0.0151552	0.149759
ENSG00000085978.21	ATG16L1	protein_coding	2695.05	-0.159253	0.0655689	-2.42879	0.0151494	0.149759
ENSG00000104219.12	ZDHHC2	protein_coding	777.973	-0.267846	0.110274	-2.42892	0.015144	0.149759
ENSG00000099622.13	CIRBP	protein_coding	4888.47	0.122801	0.0505861	2.42756	0.0152006	0.150034
ENSG00000167526.13	RPL13	protein_coding	23711	0.0912528	0.0375877	2.42773	0.0151936	0.150034
ENSG00000241468.7	ATP5J2	protein_coding	5455.49	0.157501	0.0648876	2.42729	0.0152121	0.150061
ENSG00000180354.15	MTURN	protein_coding	528.001	-0.328517	0.135388	-2.42648	0.0152461	0.150309
ENSG00000197822.10	OCLN	protein_coding	210.267	-0.514594	0.212166	-2.42543	0.0152901	0.150656
ENSG00000240875.5	RP11-392A22.2	lincRNA	141.034	0.613905	0.253272	2.4239	0.015355	0.151208
ENSG00000134884.13	ARGLU1	protein_coding	2636.32	0.167197	0.0689912	2.42346	0.0153734	0.151214
ENSG00000089356.18	FXYD3	protein_coding	11.0351	-2.41168	0.995119	-2.42351	0.0153714	0.151214
ENSG00000114480.12	GBE1	protein_coding	5494.87	0.117349	0.0484401	2.42256	0.0154116	0.151503
ENSG00000065526.10	SPEN	protein_coding	6629.71	-0.113336	0.0467895	-2.42226	0.0154245	0.151542
ENSG00000163625.15	WDFY3	protein_coding	2604.62	-0.159907	0.0660513	-2.42095	0.0154798	0.151998
ENSG00000122545.19	SEPT7	protein_coding	13174.2	0.108925	0.0450112	2.41994	0.0155231	0.152277
ENSG00000139318.7	DUSP6	protein_coding	5114.34	-0.123525	0.0510462	-2.41987	0.0155261	0.152277
ENSG00000175573.6	C11orf68	protein_coding	5313.64	-0.128713	0.0532029	-2.41928	0.0155513	0.152437
ENSG00000080224.17	EPHA6	protein_coding	24.2422	-1.53966	0.636894	-2.41745	0.0156298	0.153118
ENSG00000133121.20	STARD13	protein_coding	1059.11	-0.231441	0.0957797	-2.41639	0.0156753	0.153476
ENSG00000136630.12	HLX	protein_coding	237.274	-0.473141	0.195873	-2.41555	0.0157115	0.153742
ENSG00000107821.14	KAZALD1	protein_coding	2343.18	0.164015	0.0679105	2.41517	0.015728	0.153815
ENSG00000267645.5	RP11-577H5.5	protein_coding	873.076	-0.252155	0.104425	-2.4147	0.0157483	0.153925
ENSG00000187288.10	CIDEC	protein_coding	28.7506	1.41168	0.584709	2.41433	0.0157641	0.153991
ENSG00000136938.8	ANP32B	protein_coding	7445.47	0.107816	0.0446847	2.41281	0.0158301	0.154548
ENSG00000117226.11	GBP3	protein_coding	1360.84	-0.215425	0.0892928	-2.41257	0.0158405	0.154561
ENSG00000172071.11	EIF2AK3	protein_coding	1740.83	0.182938	0.075846	2.41197	0.0158667	0.154727
ENSG00000163879.10	DNALI1	protein_coding	9.154	2.65284	1.10012	2.41141	0.0158909	0.154875
ENSG00000163840.9	DTX3L	protein_coding	2034.55	-0.175091	0.072635	-2.41056	0.0159281	0.155148
ENSG00000166803.12	PCLAF	protein_coding	2327.1	0.163002	0.0676354	2.41001	0.015952	0.155293
ENSG00000172292.14	CERS6	protein_coding	2936.31	0.150753	0.0625821	2.40888	0.0160015	0.155686
ENSG00000153914.15	SREK1	protein_coding	1872.79	0.182956	0.0759871	2.40772	0.0160526	0.156042
ENSG00000136205.16	TNS3	protein_coding	15376.9	-0.0878577	0.0364914	-2.40763	0.0160564	0.156042
ENSG00000151623.14	NR3C2	protein_coding	279.993	-0.430501	0.178919	-2.40612	0.0161228	0.156598
ENSG00000230479.1	AP000695.6	antisense	151.221	-0.604275	0.251288	-2.40471	0.0161852	0.157114
ENSG00000084731.14	KIF3C	protein_coding	2162.22	-0.16659	0.0693137	-2.40342	0.0162425	0.157581
ENSG00000109756.9	RAPGEF2	protein_coding	1772.42	-0.18239	0.0758947	-2.40319	0.0162526	0.157589
ENSG00000134917.9	ADAMTS8	protein_coding	11.6446	2.25629	0.939562	2.40143	0.0163311	0.158261
ENSG00000204262.11	COL5A2	protein_coding	13375.1	0.0901829	0.0375585	2.40113	0.0163444	0.158299
ENSG00000135333.13	EPHA7	protein_coding	25.1074	-1.46531	0.610475	-2.40028	0.0163824	0.158577
ENSG00000089248.6	ERP29	protein_coding	4737.7	0.123777	0.0515934	2.39908	0.0164361	0.159007
ENSG00000128829.11	EIF2AK4	protein_coding	12694.4	-0.0936161	0.0390367	-2.39816	0.0164777	0.159319
ENSG00000100075.9	SLC25A1	protein_coding	3365.61	0.144606	0.0603077	2.3978	0.0164939	0.159385
ENSG00000035862.12	TIMP2	protein_coding	10965.4	-0.102407	0.0427417	-2.39595	0.0165775	0.160102
ENSG00000112473.17	SLC39A7	protein_coding	14338	0.0912538	0.0380922	2.3956	0.016593	0.160161
ENSG00000087502.17	ERGIC2	protein_coding	6114.93	0.118117	0.0493176	2.39503	0.0166191	0.160322
ENSG00000181135.15	ZNF707	protein_coding	1042.81	-0.241194	0.100719	-2.39473	0.0166328	0.160363
ENSG00000233760.1	AC004947.2	lincRNA	211.024	0.502376	0.209822	2.3943	0.0166523	0.160461
ENSG00000206527.9	HACD2	protein_coding	5083.32	0.122108	0.0510147	2.39358	0.0166847	0.160682
ENSG00000176697.18	BDNF	protein_coding	1186.03	0.218389	0.0912763	2.39261	0.0167291	0.161019
ENSG00000221963.5	APOL6	protein_coding	2033.3	-0.18219	0.0761671	-2.39197	0.0167582	0.161207
ENSG00000156162.16	DPY19L4	protein_coding	4391.79	0.129733	0.0542509	2.39136	0.0167863	0.161387
ENSG00000100764.13	PSMC1	protein_coding	7447.49	0.137638	0.0575654	2.39098	0.0168035	0.161408
ENSG00000076067.12	RBMS2	protein_coding	1855.39	-0.189189	0.079129	-2.39089	0.0168074	0.161408
ENSG00000126461.14	SCAF1	protein_coding	8846.45	-0.124833	0.0522174	-2.39064	0.0168191	0.161429
ENSG00000196922.10	ZNF252P	transcribed_unprocessed_pseudogene	4139.34	0.130308	0.0545258	2.38985	0.0168553	0.161685
ENSG00000198356.11	ASNA1	protein_coding	6659.36	-0.116764	0.0488667	-2.38943	0.0168746	0.161689
ENSG00000174469.20	CNTNAP2	protein_coding	9.81323	-2.48581	1.04026	-2.3896	0.0168666	0.161689
ENSG00000133138.19	TBC1D8B	protein_coding	670.431	0.284675	0.1192	2.38821	0.0169306	0.161749
ENSG00000180098.9	TRNAU1AP	protein_coding	719.643	0.274431	0.114915	2.38812	0.0169349	0.161749
ENSG00000131771.13	PPP1R1B	protein_coding	1643.1	0.187844	0.0786556	2.38818	0.016932	0.161749
ENSG00000103202.12	NME4	protein_coding	5738.89	0.12842	0.053757	2.3889	0.016899	0.161749
ENSG00000178952.10	TUFM	protein_coding	11558	0.0988927	0.0414096	2.38816	0.016933	0.161749
ENSG00000166173.10	LARP6	protein_coding	1642.75	-0.197939	0.082887	-2.38806	0.0169378	0.161749
ENSG00000111142.13	METAP2	protein_coding	6802.33	0.128253	0.053728	2.38708	0.016983	0.162089
ENSG00000155380.11	SLC16A1	protein_coding	11016.3	0.0987308	0.0413824	2.38582	0.0170413	0.162555
ENSG00000129636.12	ITFG1	protein_coding	2115.17	0.169927	0.0713087	2.38298	0.017173	0.16372
ENSG00000173193.13	PARP14	protein_coding	3815.41	-0.133273	0.0559422	-2.38234	0.0172032	0.163916
ENSG00000141401.11	IMPA2	protein_coding	2046.66	0.172159	0.0722877	2.38159	0.0172383	0.163975
ENSG00000165819.11	METTL3	protein_coding	2709.92	0.153786	0.0645652	2.38187	0.017225	0.163975
ENSG00000096746.17	HNRNPH3	protein_coding	8298.23	0.114552	0.0481032	2.38138	0.0172479	0.163975
ENSG00000106546.13	AHR	protein_coding	11820.2	0.0993558	0.0417186	2.38157	0.0172389	0.163975
ENSG00000153071.14	DAB2	protein_coding	1775.91	-0.187938	0.0789545	-2.38034	0.0172968	0.164349
ENSG00000182902.13	SLC25A18	protein_coding	103.602	0.697915	0.293334	2.37925	0.0173481	0.164652
ENSG00000175874.9	CREG2	protein_coding	972.838	-0.234472	0.0985454	-2.37933	0.0173443	0.164652
ENSG00000182504.10	CEP97	protein_coding	1506.31	-0.195806	0.0823891	-2.3766	0.0174729	0.165744
ENSG00000245532.8	NEAT1	lincRNA	9890.57	0.403768	0.169957	2.37571	0.0175151	0.166052
ENSG00000129562.10	DAD1	protein_coding	4969.07	0.120497	0.0507428	2.37466	0.0175654	0.166436
ENSG00000113070.7	HBEGF	protein_coding	878.277	-0.25264	0.106428	-2.37382	0.0176053	0.166722
ENSG00000256646.7	RP11-111K18.1	protein_coding	1165.73	0.250753	0.105667	2.37305	0.0176417	0.166974
ENSG00000133243.8	BTBD2	protein_coding	4839.64	-0.126114	0.0531724	-2.3718	0.0177016	0.167448
ENSG00000163938.16	GNL3	protein_coding	9014.74	0.122237	0.0515664	2.37047	0.0177653	0.167931
ENSG00000165757.8	KIAA1462	protein_coding	3654.79	-0.134889	0.0569074	-2.37033	0.0177723	0.167931
ENSG00000120526.10	NUDCD1	protein_coding	3998.83	0.136083	0.0574301	2.36954	0.0178104	0.167977
ENSG00000135451.12	TROAP	protein_coding	1712.29	-0.185928	0.0784571	-2.3698	0.0177978	0.167977
ENSG00000129226.13	CD68	protein_coding	1252.04	-0.211393	0.0892176	-2.36941	0.0178166	0.167977
ENSG00000155111.14	CDK19	protein_coding	969.024	-0.240518	0.101493	-2.36979	0.0177981	0.167977
ENSG00000154133.14	ROBO4	protein_coding	1041.13	-0.226719	0.0957257	-2.36842	0.017864	0.168331
ENSG00000103994.16	ZNF106	protein_coding	6587.86	-0.109172	0.0461075	-2.36777	0.0178959	0.168538
ENSG00000173915.14	USMG5	protein_coding	4480.77	0.151709	0.0640844	2.36734	0.0179166	0.168547
ENSG00000065833.8	ME1	protein_coding	5613.13	0.115611	0.0488325	2.3675	0.0179088	0.168547
ENSG00000143627.18	PKLR	protein_coding	7.22025	3.08843	1.30531	2.36605	0.0179791	0.168948
ENSG00000143036.16	SLC44A3	protein_coding	42.9786	-1.10195	0.465709	-2.36617	0.0179731	0.168948
ENSG00000270069.1	RP6-99M1.2	lincRNA	441.707	0.340877	0.144106	2.36545	0.0180079	0.169126
ENSG00000184900.15	SUMO3	protein_coding	14463.7	-0.0906237	0.0383248	-2.36462	0.0180484	0.169413
ENSG00000124762.13	CDKN1A	protein_coding	964.548	0.234677	0.0993034	2.36324	0.0181161	0.169955
ENSG00000074800.14	ENO1	protein_coding	156852	0.0715462	0.0302988	2.36135	0.0182084	0.170726
ENSG00000108733.9	PEX12	protein_coding	432.838	0.342685	0.145172	2.36055	0.0182478	0.171001
ENSG00000106771.12	TMEM245	protein_coding	5267.13	0.118936	0.0504354	2.35818	0.0183647	0.171814
ENSG00000002834.17	LASP1	protein_coding	18169.3	-0.0834035	0.0353669	-2.35824	0.018362	0.171814
ENSG00000116016.13	EPAS1	protein_coding	1540.79	-0.194295	0.0823849	-2.35838	0.0183548	0.171814
ENSG00000140525.17	FANCI	protein_coding	6136.79	0.111572	0.0473226	2.35768	0.0183896	0.171952
ENSG00000163389.10	POGLUT1	protein_coding	1059.14	0.226541	0.0961586	2.35591	0.0184772	0.17221
ENSG00000154978.12	VOPP1	protein_coding	9604.96	0.102745	0.0436175	2.3556	0.0184931	0.17221
ENSG00000108561.8	C1QBP	protein_coding	10739.7	0.0959795	0.040747	2.3555	0.0184979	0.17221
ENSG00000176986.15	SEC24C	protein_coding	21966.8	-0.0803127	0.0340958	-2.3555	0.0184977	0.17221
ENSG00000135404.11	CD63	protein_coding	16072.9	-0.0992634	0.0421396	-2.35559	0.0184934	0.17221
ENSG00000143367.15	TUFT1	protein_coding	719.244	-0.27139	0.115202	-2.35578	0.0184839	0.17221
ENSG00000095066.11	HOOK2	protein_coding	850.422	-0.272765	0.115747	-2.35656	0.018445	0.17221
ENSG00000143816.7	WNT9A	protein_coding	384.403	-0.365231	0.154968	-2.35681	0.0184326	0.17221
ENSG00000146112.11	PPP1R18	protein_coding	5507.79	-0.115846	0.0492049	-2.35435	0.0185552	0.172648
ENSG00000184205.14	TSPYL2	protein_coding	2359.16	0.161884	0.0687657	2.35414	0.0185654	0.172649
ENSG00000130779.19	CLIP1	protein_coding	4777.36	-0.12004	0.050997	-2.35387	0.0185792	0.172683
ENSG00000130958.11	SLC35D2	protein_coding	916.596	0.239942	0.101957	2.35336	0.0186046	0.172731
ENSG00000176532.3	PRR15	protein_coding	73.6743	-0.841985	0.357776	-2.35339	0.0186032	0.172731
ENSG00000226259.10	GTF2H2B	transcribed_unprocessed_pseudogene	310.853	0.431991	0.183634	2.35245	0.0186501	0.172888
ENSG00000084073.8	ZMPSTE24	protein_coding	7590.26	0.106803	0.0454015	2.35242	0.0186519	0.172888
ENSG00000087460.24	GNAS	protein_coding	51244.6	0.0736512	0.0313061	2.35261	0.0186421	0.172888
ENSG00000184956.15	MUC6	protein_coding	227.857	0.482687	0.205228	2.35195	0.0186752	0.17301
ENSG00000164649.19	CDCA7L	protein_coding	3611.04	0.135036	0.0574355	2.35109	0.0187187	0.173319
ENSG00000166548.15	TK2	protein_coding	839.617	0.247734	0.105389	2.35066	0.0187402	0.173408
ENSG00000006534.15	ALDH3B1	protein_coding	795.288	-0.25766	0.10962	-2.35049	0.0187487	0.173408
ENSG00000163947.11	ARHGEF3	protein_coding	1307.57	-0.202502	0.0861715	-2.34999	0.0187741	0.173548
ENSG00000169251.12	NMD3	protein_coding	6777.79	0.107364	0.0457229	2.34815	0.0188668	0.174311
ENSG00000166224.16	SGPL1	protein_coding	2920.1	-0.150138	0.0639768	-2.34676	0.0189376	0.17487
ENSG00000178927.17	C17orf62	protein_coding	2996.47	-0.152356	0.0649484	-2.3458	0.0189863	0.175225
ENSG00000165195.15	PIGA	protein_coding	1542.72	0.192453	0.0820606	2.34525	0.0190144	0.175239
ENSG00000105298.13	CACTIN	protein_coding	1978.76	-0.172589	0.0735907	-2.34526	0.0190138	0.175239
ENSG00000161682.14	FAM171A2	protein_coding	1616.61	-0.19012	0.081069	-2.34517	0.0190186	0.175239
ENSG00000159322.17	ADPGK	protein_coding	2569.57	0.152549	0.0650782	2.34409	0.0190736	0.175594
ENSG00000004455.16	AK2	protein_coding	10622.3	0.0983149	0.0419431	2.34401	0.0190778	0.175594
ENSG00000196204.11	RNF216P1	transcribed_unprocessed_pseudogene	2413.7	0.157954	0.0674023	2.34345	0.0191064	0.175762
ENSG00000154928.16	EPHB1	protein_coding	171.946	0.54635	0.233256	2.34228	0.0191664	0.17622
ENSG00000136522.13	MRPL47	protein_coding	2005.76	0.174625	0.0745612	2.34203	0.0191791	0.176241
ENSG00000151500.14	THYN1	protein_coding	1502.39	0.199715	0.0852988	2.34136	0.0192137	0.176439
ENSG00000137710.15	RDX	protein_coding	12707	0.0899363	0.0384169	2.34106	0.019229	0.176439
ENSG00000004399.12	PLXND1	protein_coding	382.332	-0.363045	0.155081	-2.34101	0.0192317	0.176439
ENSG00000204387.12	C6orf48	protein_coding	4187.31	0.1271	0.0543384	2.33904	0.0193333	0.177276
ENSG00000196632.10	WNK3	protein_coding	115.119	0.648719	0.277427	2.33834	0.0193697	0.177491
ENSG00000112739.16	PRPF4B	protein_coding	7021.46	0.116928	0.0500081	2.33819	0.0193776	0.177491
ENSG00000251562.8	MALAT1	lincRNA	14103.3	0.550324	0.235414	2.33768	0.0194037	0.177539
ENSG00000162368.13	CMPK1	protein_coding	8776.49	0.0979919	0.0419182	2.33769	0.0194031	0.177539
ENSG00000082781.11	ITGB5	protein_coding	2997.33	0.147043	0.0629363	2.33638	0.0194717	0.17797
ENSG00000263528.7	IKBKE	protein_coding	800.392	-0.254801	0.109054	-2.33647	0.0194667	0.17797
ENSG00000213341.10	CHUK	protein_coding	2563.28	0.154322	0.0660801	2.33538	0.0195234	0.178276
ENSG00000113460.12	BRIX1	protein_coding	3240.89	0.149914	0.064194	2.33533	0.0195261	0.178276
ENSG00000181467.4	RAP2B	protein_coding	2747.95	-0.147239	0.0630732	-2.33441	0.0195743	0.17862
ENSG00000171345.13	KRT19	protein_coding	21272.7	-0.0957239	0.0410115	-2.33407	0.0195918	0.178685
ENSG00000114416.17	FXR1	protein_coding	10225.5	0.111837	0.0479209	2.33377	0.0196076	0.178733
ENSG00000123700.4	KCNJ2	protein_coding	822.126	0.265944	0.113968	2.3335	0.0196218	0.178767
ENSG00000273312.2	RP11-425A6.5	antisense	301.203	-0.40825	0.175006	-2.33277	0.01966	0.179019
ENSG00000184277.12	TM2D3	protein_coding	733.186	0.266416	0.114254	2.33178	0.0197124	0.179401
ENSG00000139168.7	ZCRB1	protein_coding	2869.52	0.14753	0.0632786	2.33143	0.0197305	0.17947
ENSG00000205413.7	SAMD9	protein_coding	675.246	-0.281297	0.120739	-2.3298	0.0198166	0.180156
ENSG00000112167.9	SAYSD1	protein_coding	554.761	0.299033	0.128406	2.3288	0.0198697	0.180543
ENSG00000110925.6	CSRNP2	protein_coding	1642.28	-0.181297	0.0779177	-2.32678	0.0199769	0.181421
ENSG00000171045.14	TSNARE1	protein_coding	650.896	-0.276611	0.118905	-2.32633	0.0200012	0.181544
ENSG00000173376.13	NDNF	protein_coding	14.2693	-1.92694	0.828675	-2.32533	0.0200546	0.181932
ENSG00000182919.14	C11orf54	protein_coding	1131.43	0.227806	0.0979788	2.32505	0.0200691	0.181967
ENSG00000185164.14	NOMO2	protein_coding	15414	0.0883915	0.0380345	2.32398	0.0201265	0.182391
ENSG00000166479.9	TMX3	protein_coding	5303.53	0.115613	0.0497609	2.32337	0.0201593	0.182494
ENSG00000179869.14	ABCA13	protein_coding	325.084	-0.390108	0.167905	-2.32339	0.0201583	0.182494
ENSG00000143653.9	SCCPDH	protein_coding	4269.2	0.125093	0.053852	2.3229	0.0201846	0.182529
ENSG00000184640.17	SEPT9	protein_coding	48891.1	-0.0732551	0.0315351	-2.32297	0.0201807	0.182529
ENSG00000244509.3	APOBEC3C	protein_coding	60353.4	0.0811306	0.0349321	2.32253	0.0202047	0.182613
ENSG00000117472.9	TSPAN1	protein_coding	308.307	-0.415581	0.178959	-2.32222	0.0202211	0.182665
ENSG00000047410.13	TPR	protein_coding	8771.93	0.0998011	0.0429851	2.32176	0.0202459	0.182756
ENSG00000205683.11	DPF3	protein_coding	946.433	-0.249772	0.107585	-2.32163	0.0202527	0.182756
ENSG00000104472.9	CHRAC1	protein_coding	4172.84	-0.127788	0.0550485	-2.32138	0.0202666	0.182785
ENSG00000006576.16	PHTF2	protein_coding	4930.41	0.119002	0.0512761	2.32081	0.0202973	0.182966
ENSG00000143870.12	PDIA6	protein_coding	32148.3	0.0778531	0.0335489	2.32059	0.020309	0.182974
ENSG00000109736.14	MFSD10	protein_coding	2758.26	0.154441	0.0665926	2.3192	0.0203842	0.183468
ENSG00000240065.7	PSMB9	protein_coding	398.402	-0.349427	0.150668	-2.31918	0.0203853	0.183468
ENSG00000182606.14	TRAK1	protein_coding	1947.07	-0.169675	0.0731786	-2.31864	0.0204148	0.183539
ENSG00000086548.8	CEACAM6	protein_coding	96.123	-0.718788	0.309989	-2.31875	0.0204085	0.183539
ENSG00000103888.16	CEMIP	protein_coding	553.169	-0.318475	0.137367	-2.31843	0.0204261	0.183544
ENSG00000186104.10	CYP2R1	protein_coding	461.893	0.329828	0.142421	2.31587	0.0205653	0.184698
ENSG00000170667.14	RASA4B	protein_coding	225.549	-0.472491	0.204212	-2.31372	0.0206828	0.185558
ENSG00000205097.6	FRG2	protein_coding	7.79103	-2.77904	1.20102	-2.3139	0.0206733	0.185558
ENSG00000113328.18	CCNG1	protein_coding	5425.43	0.12176	0.0526761	2.31149	0.0208059	0.186465
ENSG00000049618.22	ARID1B	protein_coding	3135.45	-0.139303	0.0602631	-2.31159	0.0208005	0.186465
ENSG00000185361.8	TNFAIP8L1	protein_coding	1794.26	-0.17308	0.0748956	-2.31096	0.0208352	0.18663
ENSG00000131899.10	LLGL1	protein_coding	1897.69	-0.183568	0.0794511	-2.31046	0.0208629	0.18678
ENSG00000155438.11	NIFK	protein_coding	3139.36	0.152085	0.065833	2.31016	0.0208791	0.186827
ENSG00000115255.10	REEP6	protein_coding	875.059	-0.239135	0.103541	-2.30956	0.0209123	0.186947
ENSG00000258311.5	RP11-644F5.10	protein_coding	28.8125	-1.35007	0.584565	-2.30952	0.0209145	0.186947
ENSG00000162946.22	DISC1	protein_coding	161.344	-0.558477	0.241986	-2.30789	0.0210053	0.187661
ENSG00000123505.15	AMD1	protein_coding	6357.83	0.111361	0.0482949	2.30586	0.0211185	0.188428
ENSG00000159335.15	PTMS	protein_coding	7446.82	-0.108407	0.0470109	-2.306	0.0211108	0.188428
ENSG00000149557.12	FEZ1	protein_coding	1355.06	-0.199093	0.0863462	-2.30576	0.0211243	0.188428
ENSG00000260772.1	RP11-311C24.1	3prime_overlapping_ncRNA	1134.21	0.244232	0.105959	2.30497	0.0211683	0.188721
ENSG00000110200.8	ANAPC15	protein_coding	1147.24	0.217432	0.0943676	2.3041	0.0212172	0.189015
ENSG00000174684.6	B4GAT1	protein_coding	4381.71	0.123529	0.0536155	2.30399	0.0212234	0.189015
ENSG00000116667.12	C1orf21	protein_coding	180.427	0.543527	0.235956	2.30351	0.02125	0.189152
ENSG00000156482.10	RPL30	protein_coding	36104.4	0.0880987	0.0382633	2.30243	0.0213108	0.189595
ENSG00000122417.15	ODF2L	protein_coding	620.363	0.279858	0.12157	2.30204	0.0213331	0.189595
ENSG00000143537.13	ADAM15	protein_coding	12454	-0.0992034	0.0430918	-2.30214	0.0213271	0.189595
ENSG00000197563.10	PIGN	protein_coding	2978.81	0.140605	0.0610925	2.30152	0.0213623	0.189658
ENSG00000118363.11	SPCS2	protein_coding	5656.48	0.112808	0.0490119	2.30165	0.0213548	0.189658
ENSG00000170584.10	NUDCD2	protein_coding	2655.89	0.148352	0.0644806	2.30072	0.0214074	0.189906
ENSG00000257594.3	GALNT4	protein_coding	656.334	-0.27606	0.119993	-2.30063	0.0214126	0.189906
ENSG00000156639.11	ZFAND3	protein_coding	5049.11	-0.115834	0.0503722	-2.29955	0.0214736	0.190348
ENSG00000099869.7	IGF2AS	antisense	38.4642	1.1285	0.490817	2.29923	0.0214917	0.19041
ENSG00000122870.11	BICC1	protein_coding	698.916	-0.266682	0.116014	-2.29871	0.0215215	0.190574
ENSG00000115041.12	KCNIP3	protein_coding	858.321	0.241902	0.105276	2.29779	0.0215738	0.190938
ENSG00000159899.14	NPR2	protein_coding	588.909	0.293043	0.127572	2.29707	0.0216146	0.1912
ENSG00000180855.15	ZNF443	protein_coding	428.026	0.333127	0.145198	2.2943	0.0217733	0.192321
ENSG00000168275.14	COA6	protein_coding	532.138	0.317329	0.138299	2.29451	0.021761	0.192321
ENSG00000104687.13	GSR	protein_coding	4495.16	0.125862	0.0548592	2.29427	0.0217752	0.192321
ENSG00000112964.13	GHR	protein_coding	691.94	0.268777	0.117176	2.29379	0.0218027	0.192365
ENSG00000139174.11	PRICKLE1	protein_coding	1247.98	-0.228661	0.0996856	-2.29382	0.0218009	0.192365
ENSG00000121361.3	KCNJ8	protein_coding	9.38429	-2.68819	1.17206	-2.29356	0.021816	0.192382
ENSG00000243716.10	NPIPB5	protein_coding	1629.46	-0.219636	0.0957951	-2.29277	0.0218611	0.192681
ENSG00000258964.1	RP11-618G20.1	processed_transcript	175.922	0.553166	0.24132	2.29225	0.0218914	0.192848
ENSG00000167702.12	KIFC2	protein_coding	2192.02	0.176085	0.0768479	2.29134	0.0219439	0.19321
ENSG00000175548.8	ALG10B	protein_coding	706.988	-0.273972	0.119591	-2.29091	0.0219688	0.19333
ENSG00000111231.8	GPN3	protein_coding	2051.82	0.165878	0.0724194	2.29052	0.0219914	0.193429
ENSG00000102393.9	GLA	protein_coding	2173.8	0.166075	0.0725506	2.28909	0.0220743	0.194058
ENSG00000172159.15	FRMD3	protein_coding	144.743	-0.573134	0.250442	-2.28849	0.0221091	0.194264
ENSG00000280339.1	RP11-736K20.4	TEC	233.155	0.475114	0.207638	2.28819	0.0221267	0.194318
ENSG00000134910.12	STT3A	protein_coding	16537.6	0.0897786	0.0392675	2.28633	0.0222348	0.195167
ENSG00000124596.16	OARD1	protein_coding	494.271	0.311452	0.136269	2.28558	0.022279	0.195455
ENSG00000276045.3	ORAI1	protein_coding	2234.91	-0.161729	0.0707915	-2.28458	0.0223373	0.195865
ENSG00000261220.2	RP11-629O1.2	lincRNA	168.777	0.522693	0.229097	2.28154	0.0225166	0.197336
ENSG00000131094.3	C1QL1	protein_coding	322.962	-0.379582	0.166394	-2.28123	0.0225349	0.197394
ENSG00000152767.16	FARP1	protein_coding	3517.57	-0.13111	0.0574959	-2.28033	0.0225879	0.197656
ENSG00000249624.9	AP000295.9	protein_coding	22.0096	-1.96455	0.861479	-2.28044	0.0225816	0.197656
ENSG00000178950.16	GAK	protein_coding	3191.45	-0.137615	0.0603924	-2.27868	0.0226862	0.198312
ENSG00000115568.15	ZNF142	protein_coding	1732.42	-0.175562	0.0770397	-2.27885	0.0226762	0.198312
ENSG00000182552.14	RWDD4	protein_coding	1984.23	0.164647	0.0722653	2.27837	0.0227047	0.198373
ENSG00000116396.14	KCNC4	protein_coding	484.059	0.319182	0.140127	2.2778	0.0227382	0.198563
ENSG00000050130.17	JKAMP	protein_coding	4196.5	0.131447	0.0577251	2.27712	0.0227793	0.19882
ENSG00000160294.10	MCM3AP	protein_coding	7061.34	-0.104933	0.0461076	-2.27582	0.0228568	0.199394
ENSG00000179241.12	LDLRAD3	protein_coding	2206.28	0.159773	0.0702108	2.27562	0.0228687	0.199397
ENSG00000078369.17	GNB1	protein_coding	41627.5	-0.0707017	0.0311012	-2.27328	0.0230095	0.200522
ENSG00000079134.11	THOC1	protein_coding	1936.65	0.172333	0.075832	2.27256	0.0230528	0.200796
ENSG00000103226.17	NOMO3	protein_coding	4829.6	0.122033	0.053707	2.2722	0.0230746	0.200883
ENSG00000076555.15	ACACB	protein_coding	1273.14	-0.20045	0.088247	-2.27147	0.0231186	0.201164
ENSG00000087842.10	PIR	protein_coding	1749.75	0.18129	0.0798375	2.27074	0.0231629	0.201446
ENSG00000183287.13	CCBE1	protein_coding	343.894	-0.38928	0.171455	-2.27045	0.0231802	0.201494
ENSG00000182054.9	IDH2	protein_coding	5480.28	0.116846	0.0514865	2.26945	0.0232411	0.201822
ENSG00000163629.12	PTPN13	protein_coding	1545.41	-0.185781	0.0818619	-2.26944	0.0232416	0.201822
ENSG00000109320.11	NFKB1	protein_coding	2675.88	-0.146203	0.0644497	-2.26848	0.0232998	0.202224
ENSG00000114446.4	IFT57	protein_coding	2935.54	0.145077	0.0639984	2.26688	0.0233974	0.202659
ENSG00000100567.12	PSMA3	protein_coding	8778.51	0.117247	0.0517197	2.26698	0.0233917	0.202659
ENSG00000061676.14	NCKAP1	protein_coding	12000.2	-0.0906264	0.0399774	-2.26694	0.0233939	0.202659
ENSG00000125398.6	SOX9	protein_coding	6393.24	-0.118183	0.0521336	-2.26693	0.0233947	0.202659
ENSG00000126705.14	AHDC1	protein_coding	1645.52	-0.179464	0.0791794	-2.26655	0.0234177	0.202732
ENSG00000205133.11	TRIQK	protein_coding	3642.53	0.129661	0.0572207	2.26597	0.023453	0.202934
ENSG00000174442.11	ZWILCH	protein_coding	3116.3	0.151812	0.0670142	2.26538	0.0234897	0.202942
ENSG00000168291.12	PDHB	protein_coding	4253.27	0.124964	0.0551597	2.2655	0.0234821	0.202942
ENSG00000188372.14	ZP3	protein_coding	395.37	-0.342765	0.151296	-2.26552	0.0234808	0.202942
ENSG00000164251.4	F2RL1	protein_coding	23324.4	0.0810957	0.0358055	2.26489	0.0235193	0.203078
ENSG00000064763.10	FAR2	protein_coding	1481.58	-0.184814	0.0816052	-2.26473	0.0235292	0.203078
ENSG00000126822.16	PLEKHG3	protein_coding	3310.38	-0.131786	0.0582004	-2.26435	0.0235524	0.203175
ENSG00000079785.14	DDX1	protein_coding	7963.26	0.11205	0.0495057	2.26338	0.0236121	0.203587
ENSG00000087253.12	LPCAT2	protein_coding	982.409	-0.224519	0.0992049	-2.26319	0.023624	0.203587
ENSG00000064102.14	INTS13	protein_coding	5554.39	0.137092	0.0605847	2.26282	0.0236468	0.20368
ENSG00000148690.11	FRA10AC1	protein_coding	1102.66	0.211525	0.0935197	2.26182	0.0237084	0.204108
ENSG00000170743.16	SYT9	protein_coding	155.76	-0.555806	0.245759	-2.26159	0.023723	0.20413
ENSG00000112874.9	NUDT12	protein_coding	1038.57	0.217762	0.0962971	2.26135	0.0237375	0.204152
ENSG00000130558.19	OLFM1	protein_coding	471.91	0.31345	0.138663	2.26051	0.0237896	0.204429
ENSG00000166897.14	ELFN2	protein_coding	1085.64	-0.218554	0.0966863	-2.26044	0.0237937	0.204429
ENSG00000159314.11	ARHGAP27	protein_coding	2243.41	-0.159202	0.0704453	-2.25994	0.0238253	0.204597
ENSG00000164182.10	NDUFAF2	protein_coding	1274.6	0.206538	0.0914026	2.25965	0.0238429	0.204645
ENSG00000257524.6	RP11-203J24.9	protein_coding	41.6149	1.09157	0.4833	2.25857	0.0239101	0.20503
ENSG00000134248.13	LAMTOR5	protein_coding	2795.17	0.173033	0.0766193	2.25835	0.0239237	0.20503
ENSG00000177106.14	EPS8L2	protein_coding	2883.69	-0.140793	0.0623382	-2.25853	0.0239124	0.20503
ENSG00000134138.19	MEIS2	protein_coding	1634.77	0.18235	0.0807537	2.25811	0.0239391	0.205058
ENSG00000197217.12	ENTPD4	protein_coding	1500.82	0.184007	0.0815069	2.25757	0.0239727	0.205243
ENSG00000163482.11	STK36	protein_coding	1115.4	0.227182	0.100714	2.25572	0.0240881	0.206128
ENSG00000100097.11	LGALS1	protein_coding	20453.3	0.0855457	0.0379578	2.2537	0.0242149	0.207108
ENSG00000169220.17	RGS14	protein_coding	522.579	-0.307446	0.136434	-2.25344	0.0242317	0.207148
ENSG00000173588.14	CCDC41	protein_coding	682.999	0.262625	0.116622	2.25193	0.0243268	0.207545
ENSG00000178802.17	MPI	protein_coding	1282.28	0.199687	0.0886642	2.25218	0.0243111	0.207545
ENSG00000069020.18	MAST4	protein_coding	701.161	-0.260206	0.115532	-2.25224	0.0243069	0.207545
ENSG00000158301.18	GPRASP2	protein_coding	377.704	-0.366269	0.162635	-2.25209	0.0243164	0.207545
ENSG00000214046.8	SMIM7	protein_coding	2471.93	0.150567	0.0668777	2.25137	0.024362	0.207741
[truncated: 56,382 more rows]

## Sheet: 2. V7 22YtoS_vs_control
ID	Gene_Symbol	Type	baseMean	log2FoldChange	lfcSE	stat	pvalue	padj
ENSG00000135480.15	KRT7	protein_coding	6595.08	-1.29092	0.0514106	-25.11	3.87017e-139	2.89489e-135
ENSG00000205426.10	KRT81	protein_coding	29061.9	-0.859874	0.0399072	-21.5468	5.66884e-103	2.12015e-99
ENSG00000132470.13	ITGB4	protein_coding	20900.5	-0.32943	0.0326423	-10.0921	5.98603e-24	1.49252e-20
ENSG00000130600.18	H19	processed_transcript	6710.69	0.492	0.0494883	9.94175	2.73961e-23	5.12306e-20
ENSG00000198959.11	TGM2	protein_coding	11352.9	-0.362652	0.0374937	-9.67234	3.95222e-22	5.91252e-19
ENSG00000005884.17	ITGA3	protein_coding	28798.3	-0.294943	0.0316356	-9.32313	1.12959e-20	1.40822e-17
ENSG00000170442.11	KRT86	protein_coding	1453.91	-0.809128	0.0879654	-9.19826	3.63797e-20	3.4015e-17
ENSG00000159840.15	ZYX	protein_coding	24177.1	-0.303494	0.0329699	-9.20517	3.41136e-20	3.4015e-17
ENSG00000215182.8	MUC5AC	protein_coding	41292.9	-0.316452	0.037399	-8.46151	2.63941e-17	2.19364e-14
ENSG00000147394.18	ZNF185	protein_coding	2855.36	-0.517796	0.0616865	-8.39399	4.69914e-17	3.51495e-14
ENSG00000170421.12	KRT8	protein_coding	12319.2	-0.327052	0.0396958	-8.23896	1.73718e-16	1.18128e-13
ENSG00000163083.5	INHBB	protein_coding	7999.78	-0.362964	0.0442847	-8.19615	2.482e-16	1.54711e-13
ENSG00000170477.12	KRT4	protein_coding	5942.49	-0.38304	0.0468255	-8.18015	2.83479e-16	1.6311e-13
ENSG00000125827.8	TMX4	protein_coding	40193.3	0.265054	0.0329043	8.05531	7.92771e-16	4.23566e-13
ENSG00000198788.8	MUC2	protein_coding	1986.81	-0.598963	0.0749496	-7.99155	1.33255e-15	6.645e-13
ENSG00000131016.16	AKAP12	protein_coding	7541.65	-0.35165	0.0459921	-7.64588	2.07516e-14	9.70139e-12
ENSG00000123416.15	TUBA1B	protein_coding	77862.3	-0.208175	0.0272872	-7.62905	2.36483e-14	1.04053e-11
ENSG00000170323.8	FABP4	protein_coding	2615.51	0.489122	0.0648614	7.54104	4.66246e-14	1.93751e-11
ENSG00000189056.13	RELN	protein_coding	3298.86	0.452112	0.0612002	7.38743	1.49691e-13	5.89308e-11
ENSG00000196878.14	LAMB3	protein_coding	7136.69	-0.345956	0.0471781	-7.33299	2.25077e-13	8.41788e-11
ENSG00000123384.13	LRP1	protein_coding	9265.17	-0.30161	0.0412297	-7.31538	2.5666e-13	9.142e-11
ENSG00000171345.13	KRT19	protein_coding	21065.5	-0.294449	0.0407312	-7.22908	4.8626e-13	1.65328e-10
ENSG00000082397.17	EPB41L3	protein_coding	2213.83	-0.488719	0.0677975	-7.20852	5.65648e-13	1.83959e-10
ENSG00000111057.10	KRT18	protein_coding	10988.5	-0.293406	0.0409801	-7.15972	8.08423e-13	2.51959e-10
ENSG00000188157.14	AGRN	protein_coding	21625.2	-0.278983	0.0420046	-6.64172	3.10052e-11	9.03485e-09
ENSG00000125148.6	MT2A	protein_coding	3161.41	-0.388305	0.0584812	-6.63983	3.14045e-11	9.03485e-09
ENSG00000142173.14	COL6A2	protein_coding	67709.9	-0.22619	0.0345126	-6.55383	5.60815e-11	1.55366e-08
ENSG00000157613.10	CREB3L1	protein_coding	9369.78	-0.264078	0.0406267	-6.5001	8.02673e-11	2.14428e-08
ENSG00000173801.16	JUP	protein_coding	1974.36	-0.459048	0.0710204	-6.4636	1.0224e-10	2.6371e-08
ENSG00000136068.14	FLNB	protein_coding	59563.8	-0.190788	0.029779	-6.40679	1.48611e-10	3.70537e-08
ENSG00000196924.15	FLNA	protein_coding	112472	-0.20066	0.0315001	-6.37014	1.88859e-10	4.55698e-08
ENSG00000138131.3	LOXL4	protein_coding	20017.3	-0.220631	0.0346635	-6.36495	1.95356e-10	4.56644e-08
ENSG00000125534.9	PPDPF	protein_coding	6552.22	-0.283472	0.0448283	-6.3235	2.55705e-10	5.79598e-08
ENSG00000196498.13	NCOR2	protein_coding	17570.9	-0.22084	0.0351724	-6.27878	3.41243e-10	7.50734e-08
ENSG00000116260.16	QSOX1	protein_coding	19036	-0.224177	0.0360987	-6.2101	5.29504e-10	1.13163e-07
ENSG00000077147.14	TM9SF3	protein_coding	17053.9	0.225457	0.0364263	6.18942	6.03868e-10	1.2547e-07
ENSG00000104368.17	PLAT	protein_coding	128118	-0.16465	0.0268886	-6.12341	9.15934e-10	1.85167e-07
ENSG00000108679.12	LGALS3BP	protein_coding	12068.6	-0.226039	0.0372144	-6.07396	1.24793e-09	2.45645e-07
ENSG00000275496.4	CH507-24F1.2	lincRNA	1285.17	1.27535	0.212804	5.99306	2.05928e-09	3.9496e-07
ENSG00000122566.20	HNRNPA2B1	protein_coding	70528	0.181804	0.0306812	5.92559	3.11182e-09	5.8191e-07
ENSG00000134013.15	LOXL2	protein_coding	4036.85	-0.312145	0.0528884	-5.90196	3.59216e-09	6.5535e-07
ENSG00000147604.13	RPL7	protein_coding	68921	0.170277	0.0290484	5.86182	4.57816e-09	8.15348e-07
ENSG00000178209.14	PLEC	protein_coding	104845	-0.205214	0.035241	-5.82317	5.77406e-09	1.00442e-06
ENSG00000106211.8	HSPB1	protein_coding	10020.7	-0.250798	0.0431861	-5.80738	6.34599e-09	1.07882e-06
ENSG00000137309.19	HMGA1	protein_coding	65894.7	-0.160912	0.0277353	-5.80171	6.56431e-09	1.09113e-06
ENSG00000164251.4	F2RL1	protein_coding	25623.9	0.190281	0.0329109	5.78171	7.39442e-09	1.2024e-06
ENSG00000122862.4	SRGN	protein_coding	4992.11	-0.283066	0.0490775	-5.76774	8.0342e-09	1.27863e-06
ENSG00000187243.16	MAGED4B	protein_coding	3040.75	-0.358607	0.0626123	-5.72742	1.01971e-08	1.58905e-06
ENSG00000065054.13	SLC9A3R2	protein_coding	12704	-0.252077	0.0441367	-5.71129	1.12126e-08	1.71164e-06
ENSG00000116251.9	RPL22	protein_coding	28037.7	0.178397	0.0312785	5.70348	1.17383e-08	1.75605e-06
ENSG00000116649.9	SRM	protein_coding	11332.2	-0.252704	0.0443598	-5.69669	1.22156e-08	1.79162e-06
ENSG00000128591.15	FLNC	protein_coding	22624.7	-0.208997	0.0367594	-5.68555	1.3039e-08	1.87561e-06
ENSG00000143933.16	CALM2	protein_coding	18549.7	0.189881	0.0338655	5.60692	2.05955e-08	2.90668e-06
ENSG00000030582.17	GRN	protein_coding	19710	-0.185663	0.0335786	-5.52919	3.21709e-08	4.37525e-06
ENSG00000161011.19	SQSTM1	protein_coding	16519.8	-0.19184	0.034686	-5.53076	3.18838e-08	4.37525e-06
ENSG00000137285.9	TUBB2B	protein_coding	3188.85	-0.319561	0.0579543	-5.51401	3.5074e-08	4.68488e-06
ENSG00000184009.10	ACTG1	protein_coding	126150	-0.163191	0.0296244	-5.50866	3.61584e-08	4.745e-06
ENSG00000158292.6	GPR153	protein_coding	10016.5	-0.235978	0.0430068	-5.48699	4.08833e-08	5.27254e-06
ENSG00000139725.7	RHOF	protein_coding	5384.73	-0.274494	0.0504986	-5.43568	5.45876e-08	6.92059e-06
ENSG00000196352.15	CD55	protein_coding	17359.1	0.197614	0.036484	5.41647	6.07888e-08	7.57833e-06
ENSG00000008282.8	SYPL1	protein_coding	12978.6	0.219124	0.0404822	5.41284	6.20314e-08	7.60647e-06
ENSG00000142156.14	COL6A1	protein_coding	142299	-0.170149	0.031463	-5.40791	6.37638e-08	7.6928e-06
ENSG00000164919.10	COX6C	protein_coding	6093.23	0.262963	0.0486774	5.40216	6.58427e-08	7.81752e-06
ENSG00000158710.14	TAGLN2	protein_coding	28881.9	-0.173601	0.0321876	-5.39342	6.91295e-08	8.07951e-06
ENSG00000143537.13	ADAM15	protein_coding	12639	-0.22043	0.0412085	-5.34913	8.83767e-08	1.01701e-05
ENSG00000091409.14	ITGA6	protein_coding	29866.5	0.178452	0.0334338	5.33749	9.4244e-08	1.0681e-05
ENSG00000196656.7	AC004057.1	transcribed_processed_pseudogene	1431.37	-0.514054	0.0968732	-5.30647	1.11769e-07	1.21274e-05
ENSG00000182871.14	COL18A1	protein_coding	3548.5	-0.303368	0.05715	-5.30827	1.10668e-07	1.21274e-05
ENSG00000132182.11	NUP210	protein_coding	7378.2	-0.243445	0.0458784	-5.3063	1.1187e-07	1.21274e-05
ENSG00000102158.19	MAGT1	protein_coding	12778.3	0.192948	0.0363824	5.30332	1.13714e-07	1.21511e-05
ENSG00000132688.10	NES	protein_coding	6059.29	-0.243826	0.0460667	-5.29288	1.20402e-07	1.26846e-05
ENSG00000167553.15	TUBA1C	protein_coding	43615.3	-0.155617	0.0294881	-5.27729	1.31111e-07	1.36209e-05
ENSG00000142949.16	PTPRF	protein_coding	10238	-0.208945	0.0396561	-5.26892	1.37225e-07	1.40609e-05
ENSG00000107404.19	DVL1	protein_coding	13076.3	-0.256321	0.0487059	-5.26263	1.42011e-07	1.43547e-05
ENSG00000150991.14	UBC	protein_coding	74850.2	-0.142428	0.0271588	-5.24426	1.56908e-07	1.5649e-05
ENSG00000162522.10	KIAA1522	protein_coding	4093.8	-0.282428	0.053899	-5.23995	1.60619e-07	1.58083e-05
ENSG00000173674.10	EIF1AX	protein_coding	19198.7	0.17581	0.0335999	5.23245	1.6728e-07	1.625e-05
ENSG00000198918.7	RPL39	protein_coding	14954.9	0.185951	0.0356502	5.21599	1.82835e-07	1.75334e-05
ENSG00000160211.16	G6PD	protein_coding	15779.7	-0.177197	0.0344187	-5.14827	2.62904e-07	2.48927e-05
ENSG00000176788.8	BASP1	protein_coding	4336.87	-0.268042	0.0521037	-5.14439	2.68396e-07	2.5095e-05
ENSG00000139613.11	SMARCC2	protein_coding	4532.8	-0.269323	0.0524829	-5.13164	2.8723e-07	2.65245e-05
ENSG00000184640.17	SEPT9	protein_coding	50364	-0.147525	0.0288807	-5.10809	3.25436e-07	2.96862e-05
ENSG00000141522.11	ARHGDIA	protein_coding	18085.8	-0.183681	0.0361123	-5.08638	3.6496e-07	3.28904e-05
ENSG00000142186.16	SCYL1	protein_coding	9028.6	-0.219591	0.0435965	-5.03689	4.73147e-07	4.21326e-05
ENSG00000143947.13	RPS27A	protein_coding	22541.7	0.165732	0.0330018	5.02192	5.11566e-07	4.50178e-05
ENSG00000154175.16	ABI3BP	protein_coding	2409.83	-0.360788	0.0720601	-5.00677	5.53523e-07	4.81437e-05
ENSG00000096433.10	ITPR3	protein_coding	8900.49	-0.205368	0.04107	-5.00045	5.71964e-07	4.91758e-05
ENSG00000167548.14	KMT2D	protein_coding	5362.16	-0.243446	0.0491197	-4.95618	7.18931e-07	6.11092e-05
ENSG00000175592.8	FOSL1	protein_coding	35419.5	-0.161096	0.0325655	-4.94683	7.54325e-07	6.33972e-05
ENSG00000172115.8	CYCS	protein_coding	19748.3	0.188252	0.0381387	4.93597	7.97529e-07	6.62835e-05
ENSG00000169710.8	FASN	protein_coding	27468.4	-0.170396	0.0345486	-4.93207	8.1362e-07	6.68778e-05
ENSG00000063245.14	EPN1	protein_coding	17895.7	-0.178527	0.0365246	-4.88784	1.01948e-06	8.28882e-05
ENSG00000204469.12	PRRC2A	protein_coding	24152.6	-0.154465	0.0316161	-4.88563	1.03099e-06	8.29228e-05
ENSG00000142669.14	SH3BGRL3	protein_coding	15916.5	-0.168344	0.0344935	-4.88045	1.05843e-06	8.42243e-05
ENSG00000156467.9	UQCRB	protein_coding	11408.2	0.191659	0.0392932	4.87767	1.07349e-06	8.4523e-05
ENSG00000169255.14	B3GALNT1	protein_coding	5228.55	0.238632	0.0490025	4.86979	1.11716e-06	8.61479e-05
ENSG00000148773.13	MKI67	protein_coding	18603.5	-0.214022	0.0439403	-4.87075	1.11177e-06	8.61479e-05
ENSG00000075624.14	ACTB	protein_coding	146056	-0.133517	0.0275143	-4.85262	1.2184e-06	9.2996e-05
ENSG00000151208.16	DLG5	protein_coding	15430.5	-0.171204	0.0354017	-4.83604	1.32454e-06	0.000100076
ENSG00000142798.18	HSPG2	protein_coding	29484.9	-0.165397	0.0342197	-4.83338	1.34234e-06	0.000100407
ENSG00000167996.15	FTH1	protein_coding	181697	-0.128182	0.0265503	-4.82788	1.37994e-06	0.000102198
ENSG00000164983.7	TMEM65	protein_coding	2907.45	0.296811	0.0616147	4.81722	1.45575e-06	0.000106755
ENSG00000258947.6	TUBB3	protein_coding	5817.81	-0.245297	0.0511252	-4.79796	1.60286e-06	0.000116402
ENSG00000204389.9	HSPA1A	protein_coding	10849.5	-0.219917	0.0459041	-4.7908	1.66115e-06	0.000119475
ENSG00000196683.10	TOMM7	protein_coding	3275.94	0.275134	0.0575554	4.78033	1.75004e-06	0.00012467
ENSG00000072110.13	ACTN1	protein_coding	76246.7	-0.136414	0.0285753	-4.77385	1.80733e-06	0.000127536
ENSG00000275832.4	ARHGAP23	protein_coding	5052.52	-0.231528	0.0485878	-4.76515	1.88712e-06	0.000131922
ENSG00000105835.11	NAMPT	protein_coding	13265.8	0.199885	0.0420138	4.7576	1.95912e-06	0.000135687
ENSG00000186174.12	BCL9L	protein_coding	8824.2	-0.201986	0.0425411	-4.74803	2.05409e-06	0.00014096
ENSG00000110047.17	EHD1	protein_coding	10764.7	-0.187829	0.0396412	-4.73823	2.15588e-06	0.0001466
ENSG00000167978.16	SRRM2	protein_coding	23331.8	-0.177134	0.0375252	-4.72041	2.35367e-06	0.000158608
ENSG00000117020.16	AKT3	protein_coding	1296.16	-0.416307	0.0883431	-4.71238	2.44836e-06	0.000162068
ENSG00000108107.14	RPL28	protein_coding	34032.3	-0.158262	0.033576	-4.71355	2.43432e-06	0.000162068
ENSG00000160877.5	NACC1	protein_coding	15068.7	-0.171508	0.0364346	-4.70728	2.51046e-06	0.000164721
ENSG00000156976.16	EIF4A2	protein_coding	15438	0.162068	0.0345676	4.68843	2.75311e-06	0.000179072
ENSG00000131620.17	ANO1	protein_coding	2769.38	-0.287149	0.0613304	-4.68201	2.84077e-06	0.000183181
ENSG00000134363.11	FST	protein_coding	33256.5	0.153527	0.0328298	4.67645	2.91878e-06	0.000186602
ENSG00000169429.10	CXCL8	protein_coding	1570.01	-0.372861	0.0799807	-4.66188	3.13333e-06	0.000197121
ENSG00000166888.11	STAT6	protein_coding	1578.29	-0.368737	0.0790991	-4.6617	3.13601e-06	0.000197121
ENSG00000105329.9	TGFB1	protein_coding	6484.12	-0.212783	0.0456781	-4.65831	3.18814e-06	0.000198728
ENSG00000085224.21	ATRX	protein_coding	12415.1	0.18764	0.0403133	4.65454	3.24707e-06	0.000200728
ENSG00000156103.15	MMP16	protein_coding	2510.6	0.323618	0.0696518	4.64623	3.38059e-06	0.000207269
ENSG00000139921.12	TMX1	protein_coding	11303.4	0.175562	0.0378209	4.64194	3.45156e-06	0.0002099
ENSG00000139641.12	ESYT1	protein_coding	9347.5	-0.183365	0.0395644	-4.6346	3.57626e-06	0.000215729
ENSG00000138071.13	ACTR2	protein_coding	38235.9	0.151002	0.0326113	4.63035	3.65056e-06	0.00021845
ENSG00000111640.14	GAPDH	protein_coding	163891	-0.120367	0.0261056	-4.61077	4.01177e-06	0.000238159
ENSG00000100345.21	MYH9	protein_coding	43066.3	-0.135402	0.0294488	-4.59787	4.26832e-06	0.000251394
ENSG00000164904.17	ALDH7A1	protein_coding	9062.39	0.198178	0.0432149	4.58588	4.52088e-06	0.000264189
ENSG00000154545.16	MAGED4	protein_coding	1452.27	0.383573	0.0837574	4.57958	4.65917e-06	0.000270159
ENSG00000196961.12	AP2A1	protein_coding	13450.5	-0.165312	0.0363166	-4.55196	5.31486e-06	0.000305809
ENSG00000160789.19	LMNA	protein_coding	18402.3	-0.174045	0.0383358	-4.54	5.6254e-06	0.000321206
ENSG00000144711.14	IQSEC1	protein_coding	5080.56	-0.225953	0.0498088	-4.5364	5.72213e-06	0.000324254
ENSG00000065911.11	MTHFD2	protein_coding	11682	0.16872	0.0372868	4.52492	6.04188e-06	0.000339799
ENSG00000196230.12	TUBB	protein_coding	118597	-0.121555	0.0271434	-4.47826	7.52551e-06	0.000420081
ENSG00000111676.14	ATN1	protein_coding	5080.15	-0.220739	0.0493781	-4.47039	7.80765e-06	0.000430395
ENSG00000117399.13	CDC20	protein_coding	10227.5	-0.18782	0.0420461	-4.467	7.93232e-06	0.000430395
ENSG00000109089.7	CDR2L	protein_coding	3999.07	-0.246315	0.0551397	-4.46711	7.92847e-06	0.000430395
ENSG00000270647.5	TAF15	protein_coding	9107.92	0.220951	0.0494653	4.46678	7.94045e-06	0.000430395
ENSG00000178695.5	KCTD12	protein_coding	3491.22	0.252452	0.0566993	4.45247	8.48865e-06	0.000455038
ENSG00000163191.5	S100A11	protein_coding	7046.85	-0.192707	0.0432878	-4.45176	8.51676e-06	0.000455038
ENSG00000177700.5	POLR2L	protein_coding	10162.8	-0.214044	0.0481393	-4.44635	8.73407e-06	0.000463339
ENSG00000112306.7	RPS12	protein_coding	14516.7	0.171529	0.0386186	4.44161	8.9288e-06	0.000470334
ENSG00000125505.16	MBOAT7	protein_coding	13315.1	-0.159752	0.0359919	-4.43856	9.05619e-06	0.000473708
ENSG00000122861.15	PLAU	protein_coding	38455.4	-0.142348	0.03218	-4.4235	9.71159e-06	0.000504463
ENSG00000151012.13	SLC7A11	protein_coding	5301.64	0.236982	0.0535947	4.42175	9.79061e-06	0.00050506
ENSG00000127922.9	SEM1	protein_coding	3643.84	0.257336	0.0584164	4.40521	1.05683e-05	0.000541444
ENSG00000109475.16	RPL34	protein_coding	3936.23	0.244017	0.0556321	4.38627	1.15312e-05	0.00058676
ENSG00000023191.16	RNH1	protein_coding	7394.23	-0.192611	0.0440092	-4.3766	1.20544e-05	0.000609237
ENSG00000137801.10	THBS1	protein_coding	8700.65	-0.182524	0.0417963	-4.36699	1.25968e-05	0.000632374
ENSG00000133835.15	HSD17B4	protein_coding	4699.83	0.221479	0.0508723	4.35362	1.33907e-05	0.000667751
ENSG00000151651.15	ADAM8	protein_coding	1674.99	-0.353895	0.0813711	-4.34914	1.36671e-05	0.000677017
ENSG00000173418.11	NAA20	protein_coding	6132.29	0.19593	0.0452005	4.33469	1.45965e-05	0.000713608
ENSG00000167900.11	TK1	protein_coding	9698.18	-0.198058	0.045678	-4.33597	1.45116e-05	0.000713608
ENSG00000137331.11	IER3	protein_coding	4971.45	-0.211679	0.0489842	-4.32137	1.55064e-05	0.00075317
ENSG00000122359.17	ANXA11	protein_coding	21082	-0.139804	0.0323642	-4.31973	1.56223e-05	0.000753902
ENSG00000122026.10	RPL21	protein_coding	18738.3	0.148028	0.0342927	4.3166	1.58451e-05	0.000759754
ENSG00000196937.10	FAM3C	protein_coding	8828.91	0.174356	0.0404513	4.31025	1.63068e-05	0.000776911
ENSG00000111716.12	LDHB	protein_coding	19765.2	0.188084	0.0437012	4.30385	1.67852e-05	0.000794643
ENSG00000182836.9	PLCXD3	protein_coding	2044.19	0.329076	0.0765615	4.29819	1.72199e-05	0.000810095
ENSG00000164587.12	RPS14	protein_coding	29446.7	0.141954	0.0330546	4.29452	1.75068e-05	0.000818443
ENSG00000130382.8	MLLT1	protein_coding	8298.39	-0.179284	0.0418031	-4.28879	1.79653e-05	0.00082442
ENSG00000169139.11	UBE2V2	protein_coding	3673.07	0.236463	0.0551162	4.29027	1.78455e-05	0.00082442
ENSG00000177410.12	ZFAS1	antisense	7743.03	0.179993	0.041965	4.28912	1.7938e-05	0.00082442
ENSG00000154529.14	CNTNAP3B	protein_coding	1558.9	0.361	0.0844508	4.27468	1.91414e-05	0.000873036
ENSG00000172534.13	HCFC1	protein_coding	8821.75	-0.177304	0.0415763	-4.26455	2.00305e-05	0.000908048
ENSG00000155189.11	AGPAT5	protein_coding	1268.08	0.368288	0.0866199	4.25177	2.12084e-05	0.000955655
ENSG00000131507.10	NDFIP1	protein_coding	5919.95	0.199317	0.0469984	4.24094	2.22589e-05	0.000996987
ENSG00000204387.12	C6orf48	protein_coding	4585.02	0.225891	0.0533956	4.23051	2.3316e-05	0.0010319
ENSG00000005893.15	LAMP2	protein_coding	10454.2	0.16678	0.0394155	4.23134	2.32305e-05	0.0010319
ENSG00000175115.11	PACS1	protein_coding	4785.15	-0.208926	0.0494009	-4.2292	2.34522e-05	0.0010319
ENSG00000126705.14	AHDC1	protein_coding	1658.2	-0.327305	0.0774769	-4.22455	2.39416e-05	0.00104727
ENSG00000081277.12	PKP1	protein_coding	11412.3	-0.157348	0.0373266	-4.21543	2.49303e-05	0.00108418
ENSG00000197045.12	GMFB	protein_coding	9663.63	0.174943	0.0415393	4.2115	2.53683e-05	0.00109685
ENSG00000127616.18	SMARCA4	protein_coding	27475.4	-0.132498	0.0314909	-4.2075	2.58209e-05	0.00111
ENSG00000166598.14	HSP90B1	protein_coding	64531.4	0.119645	0.0284696	4.20256	2.63912e-05	0.00112803
ENSG00000163297.16	ANTXR2	protein_coding	21352.6	0.145426	0.0346742	4.19407	2.73992e-05	0.00116446
ENSG00000166165.12	CKB	protein_coding	6560.71	-0.208206	0.04971	-4.18841	2.80912e-05	0.00118713
ENSG00000168268.10	NT5DC2	protein_coding	11871.6	-0.166123	0.0397736	-4.17672	2.9574e-05	0.00123174
ENSG00000161714.11	PLCD3	protein_coding	6971.17	-0.196077	0.046951	-4.17621	2.96407e-05	0.00123174
ENSG00000132432.13	SEC61G	protein_coding	5047.82	0.209586	0.0501834	4.17641	2.96152e-05	0.00123174
ENSG00000188064.9	WNT7B	protein_coding	1925.42	-0.332876	0.0798192	-4.17037	3.04104e-05	0.00125674
ENSG00000224051.6	CPTP	protein_coding	4848.63	-0.218818	0.0526553	-4.15566	3.24351e-05	0.00131143
ENSG00000160213.6	CSTB	protein_coding	11705.9	-0.157907	0.0379921	-4.15631	3.23432e-05	0.00131143
ENSG00000104325.6	DECR1	protein_coding	4115.79	0.220313	0.0530018	4.15671	3.2287e-05	0.00131143
ENSG00000175550.7	DRAP1	protein_coding	14730.9	-0.179188	0.0430832	-4.15912	3.19481e-05	0.00131143
ENSG00000161847.13	RAVER1	protein_coding	6490.12	-0.203852	0.0491361	-4.14872	3.34333e-05	0.00134452
ENSG00000188153.13	COL4A5	protein_coding	5169.63	0.209109	0.0504343	4.14616	3.38096e-05	0.00134541
ENSG00000101188.4	NTSR1	protein_coding	4820.68	-0.213744	0.0515527	-4.14612	3.38151e-05	0.00134541
ENSG00000058085.14	LAMC2	protein_coding	3525.29	-0.238847	0.0578154	-4.13121	3.60858e-05	0.00142816
ENSG00000124942.13	AHNAK	protein_coding	100640	-0.136001	0.0329584	-4.12645	3.68407e-05	0.00145036
ENSG00000130513.6	GDF15	protein_coding	2119.82	-0.344052	0.083435	-4.12359	3.73006e-05	0.00146078
ENSG00000100528.11	CNIH1	protein_coding	13723.2	0.152913	0.0372627	4.10365	4.06677e-05	0.00158435
ENSG00000260032.1	NORAD	lincRNA	32665.2	0.130226	0.0317576	4.10064	4.1201e-05	0.00159681
ENSG00000102225.15	CDK16	protein_coding	6668.41	-0.180873	0.0441492	-4.09686	4.188e-05	0.00161476
ENSG00000065000.16	AP3D1	protein_coding	12916.2	-0.159692	0.0390406	-4.09041	4.3061e-05	0.00165178
ENSG00000185567.6	AHNAK2	protein_coding	11143.7	-0.155221	0.0379726	-4.08772	4.35628e-05	0.0016625
ENSG00000076201.14	PTPN23	protein_coding	3316.55	-0.238712	0.0584814	-4.08185	4.46793e-05	0.00169645
ENSG00000139645.9	ANKRD52	protein_coding	6169.8	-0.187242	0.0459324	-4.07646	4.57266e-05	0.00171877
ENSG00000124102.4	PI3	protein_coding	4837.41	-0.213923	0.0524769	-4.07651	4.57168e-05	0.00171877
ENSG00000114353.16	GNAI2	protein_coding	16668.6	-0.148846	0.0365441	-4.07305	4.64013e-05	0.00173541
ENSG00000155959.10	VBP1	protein_coding	4811.07	0.207322	0.0509594	4.06838	4.73408e-05	0.00176174
ENSG00000137267.5	TUBB2A	protein_coding	2704.35	-0.263643	0.0649449	-4.05949	4.91801e-05	0.00182113
ENSG00000116685.15	KIAA2013	protein_coding	5164.22	-0.206554	0.0509303	-4.05562	5.0002e-05	0.00184244
ENSG00000143321.18	HDGF	protein_coding	20146.3	-0.133266	0.0328793	-4.05318	5.05268e-05	0.00185265
ENSG00000096696.13	DSP	protein_coding	2145.01	-0.303413	0.0749224	-4.0497	5.12835e-05	0.00186923
ENSG00000184792.15	OSBP2	protein_coding	1842.79	-0.29936	0.0739378	-4.04881	5.14787e-05	0.00186923
ENSG00000123689.5	G0S2	protein_coding	2117.32	-0.278413	0.0688062	-4.04633	5.20268e-05	0.00188
ENSG00000166479.9	TMX3	protein_coding	5758.98	0.192064	0.0474877	4.04449	5.24379e-05	0.00188575
ENSG00000181222.15	POLR2A	protein_coding	6597.79	-0.188238	0.0465933	-4.04002	5.34472e-05	0.00191285
ENSG00000122565.18	CBX3	protein_coding	14209.6	0.171319	0.0424271	4.03796	5.39187e-05	0.00191291
ENSG00000160767.20	FAM189B	protein_coding	7639.92	-0.17925	0.0443932	-4.03778	5.39605e-05	0.00191291
ENSG00000198743.6	SLC5A3	protein_coding	17695.7	0.160031	0.0396888	4.03214	5.52723e-05	0.00195017
ENSG00000171858.17	RPS21	protein_coding	34576.7	0.133388	0.0331067	4.02903	5.60074e-05	0.00196683
ENSG00000145425.9	RPS3A	protein_coding	17121.9	0.141243	0.0350918	4.02495	5.69882e-05	0.00199192
ENSG00000165169.10	DYNLT3	protein_coding	3832.27	0.218184	0.0542233	4.02381	5.72647e-05	0.00199228
ENSG00000185883.11	ATP6V0C	protein_coding	5828.63	-0.188549	0.046924	-4.01817	5.86518e-05	0.00203109
ENSG00000102265.11	TIMP1	protein_coding	9866.56	-0.16016	0.0399008	-4.01395	5.9712e-05	0.00205582
ENSG00000176014.12	TUBB6	protein_coding	3029.98	-0.239348	0.0596411	-4.01314	5.99156e-05	0.00205582
ENSG00000198363.17	ASPH	protein_coding	59186	0.126284	0.0314936	4.00982	6.07646e-05	0.00207543
ENSG00000153130.17	SCOC	protein_coding	3727.4	0.237938	0.0593767	4.00726	6.14282e-05	0.00208558
ENSG00000163931.15	TKT	protein_coding	18561.5	-0.14134	0.0352775	-4.00652	6.16195e-05	0.00208558
ENSG00000173852.14	DPY19L1	protein_coding	6761.49	0.178566	0.0446924	3.99544	6.45743e-05	0.00212359
ENSG00000156162.16	DPY19L4	protein_coding	4768.89	0.205968	0.0515446	3.99591	6.4446e-05	0.00212359
ENSG00000117298.14	ECE1	protein_coding	7758.39	-0.167841	0.0420001	-3.99621	6.43645e-05	0.00212359
ENSG00000087495.16	PHACTR3	protein_coding	3502.9	-0.240373	0.0601317	-3.99743	6.40329e-05	0.00212359
ENSG00000049449.9	RCN1	protein_coding	10500	0.153337	0.0383835	3.99487	6.47299e-05	0.00212359
ENSG00000035403.17	VCL	protein_coding	46925.1	-0.119385	0.0298493	-3.9996	6.34509e-05	0.00212359
ENSG00000126562.16	WNK4	protein_coding	2756.99	-0.258851	0.0647527	-3.99753	6.4006e-05	0.00212359
ENSG00000153140.8	CETN3	protein_coding	1585.21	0.323906	0.0812086	3.98856	6.64745e-05	0.00212491
ENSG00000142002.17	DPP9	protein_coding	13495.2	-0.153737	0.0385231	-3.99078	6.58575e-05	0.00212491
ENSG00000164086.9	DUSP7	protein_coding	4777.62	-0.200854	0.050305	-3.99272	6.53186e-05	0.00212491
ENSG00000164880.15	INTS1	protein_coding	12893.5	-0.162306	0.0406835	-3.98949	6.62166e-05	0.00212491
ENSG00000117983.17	MUC5B	protein_coding	10358.3	-0.155128	0.0388661	-3.99135	6.56984e-05	0.00212491
ENSG00000132481.6	TRIM47	protein_coding	3108.63	-0.241583	0.0605423	-3.99031	6.59859e-05	0.00212491
ENSG00000075089.9	ACTR6	protein_coding	1384.96	0.345894	0.086783	3.98573	6.72722e-05	0.00213637
ENSG00000161203.13	AP2M1	protein_coding	24101	-0.128918	0.0323567	-3.98426	6.76897e-05	0.00213637
ENSG00000160182.2	TFF1	protein_coding	3683.48	-0.260277	0.0653238	-3.98441	6.76481e-05	0.00213637
ENSG00000168056.15	LTBP3	protein_coding	6336.75	-0.189573	0.0476306	-3.98006	6.88986e-05	0.00216539
ENSG00000115756.12	HPCAL1	protein_coding	8607.12	-0.199115	0.050127	-3.97221	7.12094e-05	0.00222865
ENSG00000275216.1	RP11-54H7.4	lincRNA	3747.21	-0.235507	0.0593063	-3.97102	7.15649e-05	0.00223044
ENSG00000156515.22	HK1	protein_coding	21827.4	-0.12846	0.0323916	-3.96584	7.31383e-05	0.00226064
ENSG00000127314.17	RAP1B	protein_coding	7347.53	0.177419	0.0447339	3.9661	7.30581e-05	0.00226064
ENSG00000064601.17	CTSA	protein_coding	12133.9	-0.146021	0.0368579	-3.96173	7.44096e-05	0.00229047
ENSG00000109501.13	WFS1	protein_coding	3771.62	-0.215511	0.0544207	-3.9601	7.49194e-05	0.00229671
ENSG00000133872.13	SARAF	protein_coding	4967.33	0.196477	0.049666	3.95596	7.62267e-05	0.00232725
ENSG00000170961.6	HAS2	protein_coding	2696.3	0.246957	0.0624544	3.9542	7.67922e-05	0.00233498
ENSG00000101057.15	MYBL2	protein_coding	11835.8	-0.145992	0.0370078	-3.94488	7.98385e-05	0.00241778
ENSG00000127184.12	COX7C	protein_coding	12864.7	0.147041	0.037313	3.94075	8.12267e-05	0.0024499
ENSG00000181649.6	PHLDA2	protein_coding	3473.62	-0.240645	0.061084	-3.93958	8.16261e-05	0.00245206
ENSG00000132824.13	SERINC3	protein_coding	12609.2	0.150782	0.0383027	3.9366	8.26453e-05	0.00247275
ENSG00000155096.13	AZIN1	protein_coding	24150.3	0.136973	0.034842	3.93126	8.45014e-05	0.00251821
ENSG00000204899.5	MZT1	protein_coding	2513.65	0.258425	0.0658625	3.9237	8.71997e-05	0.00258831
ENSG00000127954.12	STEAP4	protein_coding	6082.97	0.189305	0.048268	3.92196	8.78302e-05	0.00259672
ENSG00000105063.18	PPP6R1	protein_coding	18723.6	-0.151386	0.0386696	-3.91485	9.0462e-05	0.002664
ENSG00000116285.12	ERRFI1	protein_coding	8551.65	-0.163462	0.041809	-3.90973	9.2401e-05	0.00270122
ENSG00000002834.17	LASP1	protein_coding	18890.4	-0.129929	0.0332332	-3.9096	9.24483e-05	0.00270122
ENSG00000177106.14	EPS8L2	protein_coding	2944.94	-0.24367	0.0624135	-3.90413	9.45652e-05	0.00275233
ENSG00000116133.11	DHCR24	protein_coding	12068.8	-0.146136	0.0374559	-3.90156	9.55747e-05	0.00277092
ENSG00000117394.21	SLC2A1	protein_coding	5489.35	-0.197521	0.0506774	-3.89762	9.71425e-05	0.00280551
ENSG00000173210.19	ABLIM3	protein_coding	4203.91	-0.20729	0.0532949	-3.8895	0.000100451	0.00287882
ENSG00000070814.18	TCOF1	protein_coding	12240.2	-0.148183	0.038091	-3.89023	0.000100147	0.00287882
ENSG00000071564.14	TCF3	protein_coding	9234.71	-0.171826	0.0441952	-3.88789	0.000101121	0.00288697
ENSG00000130522.5	JUND	protein_coding	1619.85	-0.312924	0.0806687	-3.87913	0.000104833	0.00298156
ENSG00000149091.15	DGKZ	protein_coding	5861.61	-0.191731	0.0495639	-3.86835	0.000109573	0.00310457
ENSG00000160223.17	ICOSLG	protein_coding	2876.19	-0.233955	0.0605063	-3.86662	0.000110354	0.0031149
ENSG00000011028.13	MRC2	protein_coding	4253.56	-0.200317	0.051828	-3.86503	0.000111076	0.0031235
ENSG00000127418.14	FGFRL1	protein_coding	2472.7	-0.251958	0.0652689	-3.86031	0.000113243	0.00316067
ENSG00000172172.7	MRPL13	protein_coding	3779.55	0.229657	0.0594809	3.86102	0.000112912	0.00316067
ENSG00000151247.12	EIF4E	protein_coding	3634.45	0.216699	0.0562169	3.85469	0.000115876	0.00322212
ENSG00000164934.13	DCAF13	protein_coding	9675.43	0.171623	0.0445474	3.8526	0.000116869	0.00323771
ENSG00000091140.13	DLD	protein_coding	11366.3	0.150918	0.0391905	3.85089	0.000117687	0.00324834
ENSG00000110104.11	CCDC86	protein_coding	8421.93	-0.16755	0.0435606	-3.84637	0.000119882	0.00329676
ENSG00000163814.7	CDCP1	protein_coding	22849.8	-0.12638	0.0329566	-3.83473	0.000125702	0.00343156
ENSG00000188486.3	H2AFX	protein_coding	9340.93	-0.179396	0.046778	-3.83506	0.000125533	0.00343156
ENSG00000126945.8	HNRNPH2	protein_coding	5202.52	0.185824	0.0487005	3.81565	0.000135824	0.00368107
ENSG00000170921.15	TANC2	protein_coding	4568.39	-0.210844	0.0552576	-3.81565	0.000135826	0.00368107
ENSG00000151929.9	BAG3	protein_coding	3609.95	-0.211091	0.0554863	-3.80438	0.00014216	0.00378897
ENSG00000150995.18	ITPR1	protein_coding	2631.38	-0.241454	0.0634439	-3.80578	0.000141356	0.00378897
ENSG00000185236.11	RAB11B	protein_coding	4777.28	-0.190157	0.0499842	-3.80434	0.000142183	0.00378897
ENSG00000159263.15	SIM2	protein_coding	5917.34	-0.183078	0.0480956	-3.80654	0.000140926	0.00378897
ENSG00000141526.16	SLC16A3	protein_coding	18430.3	-0.153027	0.0402271	-3.80407	0.00014234	0.00378897
ENSG00000219481.10	NBPF1	protein_coding	8011.89	-0.159723	0.0420706	-3.79656	0.00014672	0.00389172
ENSG00000166825.13	ANPEP	protein_coding	14918.1	-0.137611	0.0363425	-3.7865	0.000152784	0.00403825
ENSG00000175793.11	SFN	protein_coding	5872.69	-0.215197	0.0569356	-3.77966	0.000157045	0.00413625
ENSG00000171928.13	TVP23B	protein_coding	2070.17	0.263653	0.0698027	3.77712	0.000158653	0.00416394
ENSG00000184897.5	H1FX	protein_coding	3243.24	-0.247093	0.0654432	-3.77569	0.000159566	0.00417327
ENSG00000088038.18	CNOT3	protein_coding	5358.84	-0.180427	0.047875	-3.76871	0.000164091	0.00426181
ENSG00000189060.5	H1F0	protein_coding	26220.5	-0.122325	0.0324519	-3.76942	0.000163628	0.00426181
ENSG00000175137.10	SH3BP5L	protein_coding	2610.35	-0.237834	0.0631484	-3.76627	0.000165702	0.00428877
ENSG00000188229.5	TUBB4B	protein_coding	19209.8	-0.144068	0.0382992	-3.76164	0.000168805	0.00435401
ENSG00000143761.15	ARF1	protein_coding	37615.1	-0.118957	0.0316564	-3.75775	0.000171448	0.00440698
ENSG00000101972.18	STAG2	protein_coding	14911.5	0.152237	0.0406548	3.74464	0.000180654	0.00462771
ENSG00000167601.11	AXL	protein_coding	13569	-0.135126	0.0361387	-3.7391	0.000184677	0.00471462
ENSG00000130175.9	PRKCSH	protein_coding	26361	-0.118213	0.0316368	-3.73658	0.000186539	0.00474595
ENSG00000106355.9	LSM5	protein_coding	3099.43	0.231098	0.0619381	3.73111	0.000190639	0.00483383
ENSG00000182287.14	AP1S2	protein_coding	5010.63	0.182064	0.0488235	3.72903	0.000192216	0.00485735
ENSG00000013306.15	SLC25A39	protein_coding	17816.9	-0.139496	0.0374198	-3.72785	0.00019312	0.00486376
ENSG00000108848.15	LUC7L3	protein_coding	8891.13	0.156297	0.0419773	3.72336	0.000196589	0.00491802
ENSG00000124664.10	SPDEF	protein_coding	3502.17	-0.218955	0.0587951	-3.72403	0.000196064	0.00491802
ENSG00000092841.18	MYL6	protein_coding	12632.7	-0.142467	0.0383296	-3.71689	0.000201687	0.00502872
ENSG00000129038.15	LOXL1	protein_coding	4777.18	-0.194864	0.0524651	-3.71416	0.000203878	0.00506648
ENSG00000130702.15	LAMA5	protein_coding	40199.5	-0.146864	0.0395851	-3.71008	0.000207193	0.00513179
ENSG00000245910.8	SNHG6	processed_transcript	2107.97	0.258519	0.0697031	3.70886	0.000208196	0.00513963
ENSG00000140612.13	SEC11A	protein_coding	5774.06	0.181954	0.0491104	3.705	0.000211393	0.00520138
ENSG00000180398.11	MCFD2	protein_coding	15387.5	0.1351	0.0365486	3.69644	0.000218643	0.00536212
ENSG00000126603.8	GLIS2	protein_coding	1264.15	-0.320794	0.0868224	-3.69484	0.000220028	0.00537846
ENSG00000167658.15	EEF2	protein_coding	104604	-0.103588	0.0280462	-3.69346	0.000221221	0.00539002
ENSG00000204370.10	SDHD	protein_coding	7368.58	0.167815	0.0454933	3.68878	0.00022533	0.0054723
ENSG00000118855.18	MFSD1	protein_coding	4385.38	0.189057	0.0513567	3.68125	0.000232093	0.00560018
ENSG00000041353.9	RAB27B	protein_coding	1668.38	-0.290183	0.0788173	-3.68171	0.000231675	0.00560018
ENSG00000215301.10	DDX3X	protein_coding	22020.3	0.13035	0.0354422	3.67783	0.000235229	0.00565279
ENSG00000114738.10	MAPKAPK3	protein_coding	6076.62	-0.174669	0.0475002	-3.67723	0.000235785	0.00565279
ENSG00000167767.13	KRT80	protein_coding	1552.65	-0.28977	0.078891	-3.67305	0.000239677	0.00572774
ENSG00000079805.16	DNM2	protein_coding	13942.2	-0.132975	0.0362608	-3.66717	0.000245248	0.00580525
ENSG00000185624.14	P4HB	protein_coding	72388.2	-0.103084	0.0281003	-3.66844	0.000244034	0.00580525
ENSG00000176986.15	SEC24C	protein_coding	22908.5	-0.117571	0.0320552	-3.66777	0.000244676	0.00580525
ENSG00000101986.11	ABCD1	protein_coding	5134.18	-0.188837	0.0515715	-3.66165	0.000250593	0.00589444
ENSG00000119396.10	RAB14	protein_coding	4933.92	0.18732	0.0511563	3.66172	0.000250527	0.00589444
ENSG00000197381.15	ADARB1	protein_coding	10211.1	-0.140769	0.038485	-3.65775	0.000254435	0.00594741
ENSG00000116741.7	RGS2	protein_coding	5484.69	-0.173923	0.0475451	-3.65807	0.000254124	0.00594741
ENSG00000132356.11	PRKAA1	protein_coding	7618.6	0.165741	0.0453315	3.6562	0.000255977	0.00596483
ENSG00000128609.14	NDUFA5	protein_coding	3375.75	0.218493	0.0597728	3.65539	0.000256787	0.00596511
ENSG00000070669.16	ASNS	protein_coding	4316.06	0.200625	0.0549098	3.65371	0.000258474	0.00598572
ENSG00000126461.14	SCAF1	protein_coding	9178.98	-0.178307	0.0488719	-3.64846	0.000263814	0.00609052
ENSG00000084774.13	CAD	protein_coding	10497.3	-0.143468	0.0393349	-3.64735	0.000264957	0.00609809
ENSG00000182220.14	ATP6AP2	protein_coding	6166.42	0.168289	0.0462079	3.64199	0.000270534	0.00618836
ENSG00000137076.20	TLN1	protein_coding	16257.1	-0.12871	0.0353344	-3.64262	0.000269877	0.00618836
ENSG00000116871.15	MAP7D1	protein_coding	6337.2	-0.177704	0.0488958	-3.63433	0.000278701	0.00635575
ENSG00000133706.17	LARS	protein_coding	15792.6	0.13075	0.035989	3.63305	0.000280093	0.00636806
ENSG00000006625.17	GGCT	protein_coding	4042.77	0.19692	0.0542489	3.62993	0.000283495	0.00642064
ENSG00000115419.12	GLS	protein_coding	8557.55	0.151969	0.041872	3.62936	0.000284122	0.00642064
ENSG00000099812.8	MISP	protein_coding	1999.11	-0.282269	0.0778714	-3.62481	0.000289171	0.00651505
ENSG00000163682.16	RPL9	protein_coding	11989.1	0.147748	0.0408061	3.62073	0.000293769	0.00659878
ENSG00000233369.7	RP11-396K3.1	transcribed_processed_pseudogene	3996.82	0.254276	0.0703004	3.61699	0.000298049	0.00667487
ENSG00000169047.5	IRS1	protein_coding	4494.29	-0.185416	0.0513623	-3.60995	0.000306252	0.0068381
ENSG00000183856.10	IQGAP3	protein_coding	3064.42	-0.212259	0.0588846	-3.60466	0.000312558	0.00695815
ENSG00000125304.9	TM9SF2	protein_coding	12747.9	0.130388	0.0361813	3.60373	0.000313688	0.00695972
ENSG00000130985.16	UBA1	protein_coding	24376.9	-0.116267	0.0322689	-3.60306	0.00031449	0.00695972
ENSG00000105726.16	ATP13A1	protein_coding	5571.79	-0.169588	0.0470876	-3.60153	0.000316349	0.00698021
ENSG00000154330.12	PGM5	protein_coding	4297.34	-0.186096	0.0516863	-3.60048	0.000317626	0.00698777
ENSG00000101210.11	EEF1A2	protein_coding	32801.4	-0.115578	0.0321743	-3.59225	0.000327832	0.00717373
ENSG00000106588.10	PSMA2	protein_coding	7315.09	0.156291	0.0435093	3.59212	0.000327997	0.00717373
ENSG00000164818.15	DNAAF5	protein_coding	6065.85	-0.163997	0.0456832	-3.58989	0.000330822	0.00719346
ENSG00000139629.15	GALNT6	protein_coding	3161.57	-0.215023	0.0598851	-3.59059	0.000329926	0.00719346
ENSG00000067057.16	PFKP	protein_coding	8548.85	-0.154953	0.043184	-3.58821	0.000332959	0.00721894
ENSG00000196205.8	EEF1A1P5	processed_pseudogene	1923.81	-0.28223	0.0787082	-3.58578	0.000336074	0.00723158
ENSG00000047849.21	MAP4	protein_coding	24789.7	-0.126855	0.0353801	-3.58549	0.000336443	0.00723158
ENSG00000175221.14	MED16	protein_coding	2309.36	-0.238994	0.0666551	-3.58553	0.00033639	0.00723158
ENSG00000177697.18	CD151	protein_coding	16087.5	-0.138468	0.0386325	-3.58423	0.000338079	0.00724593
ENSG00000187109.13	NAP1L1	protein_coding	21455.7	0.122438	0.0342717	3.57256	0.000353512	0.00755505
ENSG00000113387.11	SUB1	protein_coding	5791.08	0.167303	0.0468608	3.5702	0.000356704	0.00760155
ENSG00000014216.15	CAPN1	protein_coding	16960	-0.13971	0.0391765	-3.56618	0.000362229	0.00769738
ENSG00000167962.13	ZNF598	protein_coding	5396.17	-0.168814	0.0474427	-3.55826	0.000373316	0.00791049
ENSG00000166741.7	NNMT	protein_coding	2174.8	0.257509	0.0724886	3.5524	0.000381733	0.008066
ENSG00000169045.17	HNRNPH1	protein_coding	18996.8	0.12063	0.0339864	3.54937	0.000386155	0.00813645
ENSG00000080845.17	DLGAP4	protein_coding	5569.52	-0.168136	0.0473995	-3.5472	0.000389343	0.00818058
ENSG00000125868.15	DSTN	protein_coding	20518.7	0.115779	0.0326996	3.54068	0.000399097	0.00833219
ENSG00000114867.20	EIF4G1	protein_coding	43531.5	-0.105974	0.0299349	-3.54015	0.0003999	0.00833219
ENSG00000053747.15	LAMA3	protein_coding	7501.3	-0.153461	0.043344	-3.54053	0.000399319	0.00833219
ENSG00000119777.18	TMEM214	protein_coding	5920.98	-0.162133	0.0458631	-3.53515	0.000407546	0.00846789
ENSG00000185359.12	HGS	protein_coding	5695.46	-0.170655	0.0483161	-3.53204	0.000412362	0.00848418
ENSG00000007168.12	PAFAH1B1	protein_coding	6628.33	0.156024	0.0441736	3.53206	0.00041233	0.00848418
ENSG00000174695.9	TMEM167A	protein_coding	7849.57	0.152059	0.0430552	3.53172	0.000412867	0.00848418
ENSG00000131462.7	TUBG1	protein_coding	5531.88	-0.172404	0.0487884	-3.53371	0.000409775	0.00848418
ENSG00000169567.11	HINT1	protein_coding	5531.05	0.16706	0.0474049	3.52411	0.000424902	0.00870757
ENSG00000117906.13	RCN2	protein_coding	3929.64	0.192026	0.0545079	3.5229	0.000426847	0.00872354
ENSG00000162889.10	MAPKAPK2	protein_coding	5486.59	-0.169078	0.0480721	-3.51717	0.000436168	0.00888974
ENSG00000104880.17	ARHGEF18	protein_coding	6424.17	-0.162052	0.0460945	-3.51565	0.000438676	0.00891657
ENSG00000183020.13	AP2A2	protein_coding	6619.74	-0.158182	0.0450576	-3.51065	0.00044701	0.00901266
ENSG00000197563.10	PIGN	protein_coding	3219.78	0.204212	0.0581543	3.51156	0.000445488	0.00901266
ENSG00000183255.11	PTTG1IP	protein_coding	24361.5	-0.111453	0.0317472	-3.51065	0.000447018	0.00901266
ENSG00000141568.20	FOXK2	protein_coding	7845.26	-0.149355	0.0425728	-3.50822	0.000451117	0.00907084
ENSG00000075618.17	FSCN1	protein_coding	41467.2	-0.122284	0.0349941	-3.49442	0.000475098	0.00952744
ENSG00000149782.11	PLCB3	protein_coding	4180.32	-0.186128	0.0533054	-3.49172	0.000479917	0.00959835
ENSG00000133816.14	MICAL2	protein_coding	10096.9	-0.140858	0.0403935	-3.48715	0.000488191	0.00973778
ENSG00000204673.10	AKT1S1	protein_coding	7878.78	-0.154245	0.0442541	-3.48543	0.000491344	0.00977461
ENSG00000163932.13	PRKCD	protein_coding	2044.07	-0.245059	0.0703341	-3.4842	0.000493602	0.00979054
ENSG00000197747.8	S100A10	protein_coding	8262.55	-0.144474	0.0414813	-3.48287	0.000496071	0.00979054
ENSG00000253368.3	TRNP1	protein_coding	2774.56	-0.218655	0.0627784	-3.48296	0.000495895	0.00979054
ENSG00000110717.12	NDUFS8	protein_coding	4169.55	-0.193904	0.055761	-3.47742	0.000506265	0.00996543
ENSG00000198910.13	L1CAM	protein_coding	1219.05	-0.319179	0.091878	-3.47395	0.00051286	0.0100482
ENSG00000090020.10	SLC9A1	protein_coding	3096.66	-0.20808	0.0599119	-3.47309	0.000514498	0.0100482
ENSG00000106537.7	TSPAN13	protein_coding	7183.21	0.15125	0.0435432	3.47355	0.000513614	0.0100482
ENSG00000170312.15	CDK1	protein_coding	10097.4	0.138185	0.0398381	3.46866	0.000523061	0.0101888
ENSG00000180921.6	FAM83H	protein_coding	5402.46	-0.179162	0.05171	-3.46475	0.000530722	0.0103112
ENSG00000105738.10	SIPA1L3	protein_coding	3138.75	-0.205852	0.0594318	-3.46366	0.00053287	0.0103261
ENSG00000105926.15	MPP6	protein_coding	3141.97	0.20563	0.0593867	3.46257	0.000535047	0.0103415
ENSG00000130479.10	MAP1S	protein_coding	2567.19	-0.224378	0.0648365	-3.46067	0.000538825	0.0103877
ENSG00000032444.16	PNPLA6	protein_coding	10307.3	-0.148682	0.0429779	-3.4595	0.000541181	0.0104054
ENSG00000125520.13	SLC2A4RG	protein_coding	7157.35	-0.169669	0.049054	-3.45883	0.000542529	0.0104054
ENSG00000122591.11	FAM126A	protein_coding	3567.27	0.197903	0.057261	3.45616	0.000547934	0.0104822
ENSG00000063244.12	U2AF2	protein_coding	20545.6	-0.122688	0.0355074	-3.45529	0.000549693	0.010489
ENSG00000103260.8	METRN	protein_coding	3512.48	-0.237768	0.0688432	-3.45376	0.00055283	0.0104953
ENSG00000171161.12	ZNF672	protein_coding	2349.72	-0.237125	0.0686535	-3.45394	0.000552469	0.0104953
ENSG00000138166.5	DUSP5	protein_coding	1863.68	-0.255418	0.0739772	-3.45266	0.000555098	0.0105117
ENSG00000177542.10	SLC25A22	protein_coding	4195.37	-0.188586	0.0546558	-3.45044	0.000559682	0.0105718
ENSG00000166012.16	TAF1D	protein_coding	5013.9	0.169589	0.0491622	3.44959	0.000561448	0.0105784
ENSG00000162734.12	PEA15	protein_coding	6717.39	-0.156108	0.0452703	-3.44835	0.000564013	0.0106001
ENSG00000197324.8	LRP10	protein_coding	11074.1	-0.137173	0.0398749	-3.44007	0.000581561	0.0108783
ENSG00000138623.10	SEMA7A	protein_coding	3424.45	-0.19367	0.0562994	-3.43999	0.000581726	0.0108783
ENSG00000078061.12	ARAF	protein_coding	3694.19	-0.191917	0.0558194	-3.43818	0.000585648	0.0109243
ENSG00000130726.11	TRIM28	protein_coding	28741.3	-0.116261	0.0338261	-3.43703	0.000588128	0.0109433
ENSG00000069011.15	PITX1	protein_coding	2202.24	-0.284673	0.0829297	-3.4327	0.000597598	0.0110919
ENSG00000184363.9	PKP3	protein_coding	2928.37	-0.223848	0.0652447	-3.43089	0.000601598	0.0111385
ENSG00000073756.11	PTGS2	protein_coding	1984.39	0.25476	0.074319	3.42793	0.000608207	0.0112331
ENSG00000159784.17	FAM131B	protein_coding	1843.6	-0.250985	0.0732955	-3.42429	0.000616402	0.0113564
ENSG00000115365.11	LANCL1	protein_coding	4104.51	0.18594	0.0543168	3.42324	0.000618792	0.0113724
ENSG00000125844.15	RRBP1	protein_coding	23887.8	-0.121908	0.0356306	-3.42145	0.000622893	0.0114197
ENSG00000006062.14	MAP3K14	protein_coding	1560.36	-0.279295	0.0817377	-3.41696	0.000633247	0.0115811
ENSG00000178202.12	KDELC2	protein_coding	7558.98	0.145268	0.0425594	3.41331	0.000641801	0.0117089
ENSG00000115540.14	MOB4	protein_coding	2645.32	0.218086	0.0639831	3.40849	0.000653231	0.0118885
ENSG00000104960.15	PTOV1	protein_coding	5538.82	-0.167717	0.0493413	-3.39912	0.000676019	0.0122436
ENSG00000176946.11	THAP4	protein_coding	4801.15	-0.175283	0.0515669	-3.39913	0.000676004	0.0122436
ENSG00000177666.16	PNPLA2	protein_coding	3453.84	-0.206748	0.0609145	-3.39407	0.000688617	0.0124117
ENSG00000179262.9	RAD23A	protein_coding	7669.37	-0.145622	0.0429008	-3.39438	0.000687843	0.0124117
ENSG00000142453.11	CARM1	protein_coding	11422.2	-0.134113	0.039542	-3.39167	0.000694679	0.0124609
ENSG00000143819.12	EPHX1	protein_coding	4936.02	-0.168543	0.0496856	-3.39219	0.000693352	0.0124609
ENSG00000214753.2	HNRNPUL2	protein_coding	12842.2	0.129425	0.0381759	3.39024	0.000698323	0.0124879
ENSG00000071082.10	RPL31	protein_coding	10744.1	0.130053	0.0383678	3.38965	0.000699821	0.0124879
ENSG00000164889.13	SLC4A2	protein_coding	12644.8	-0.142039	0.0419105	-3.38911	0.000701193	0.0124879
ENSG00000149925.18	ALDOA	protein_coding	61161.8	-0.106924	0.0315784	-3.38599	0.000709223	0.0125775
ENSG00000089154.10	GCN1	protein_coding	25021.4	-0.106754	0.0315294	-3.38585	0.000709588	0.0125775
ENSG00000116670.14	MAD2L2	protein_coding	3573.52	-0.201105	0.059426	-3.38411	0.000714082	0.0126272
ENSG00000185215.8	TNFAIP2	protein_coding	2244.27	-0.227709	0.0673004	-3.38347	0.000715765	0.0126272
ENSG00000050820.16	BCAR1	protein_coding	4846.39	-0.188394	0.0557113	-3.3816	0.000720641	0.0126833
ENSG00000116791.13	CRYZ	protein_coding	3728.03	0.191931	0.0568225	3.37774	0.000730851	0.0127877
ENSG00000185800.11	DMWD	protein_coding	1503.16	-0.277489	0.0821602	-3.37742	0.000731705	0.0127877
ENSG00000162981.13	FAM84A	protein_coding	3939.29	-0.186206	0.0551257	-3.37784	0.000730583	0.0127877
ENSG00000164078.12	MST1R	protein_coding	2897.51	-0.209249	0.0620585	-3.37181	0.000746765	0.0129902
ENSG00000174307.6	PHLDA3	protein_coding	1701.96	-0.307571	0.0912022	-3.37241	0.000745128	0.0129902
ENSG00000164237.8	CMBL	protein_coding	14098.1	0.124177	0.036841	3.37063	0.000749972	0.0130158
ENSG00000164896.19	FASTK	protein_coding	5033.51	-0.172492	0.0512043	-3.3687	0.000755244	0.0130594
ENSG00000122515.14	ZMIZ2	protein_coding	5780.41	-0.155498	0.0461634	-3.36843	0.000755976	0.0130594
ENSG00000110697.12	PITPNM1	protein_coding	3801.23	-0.207522	0.06164	-3.36667	0.000760823	0.0131128
ENSG00000141564.13	RPTOR	protein_coding	6241.98	-0.15331	0.0455493	-3.3658	0.00076322	0.0131239
ENSG00000104979.8	C19orf53	protein_coding	6282.98	-0.172435	0.051268	-3.36341	0.00076986	0.0131474
ENSG00000114942.13	EEF1B2	protein_coding	12317.2	0.127428	0.0378742	3.3645	0.000766824	0.0131474
ENSG00000105364.13	MRPL4	protein_coding	8915.97	-0.152229	0.045256	-3.36372	0.000768983	0.0131474
ENSG00000104774.12	MAN2B1	protein_coding	6424.79	-0.152227	0.0452954	-3.36076	0.000777279	0.0132438
ENSG00000112787.12	FBRSL1	protein_coding	4080.96	-0.197799	0.0588693	-3.35996	0.000779536	0.0132521
ENSG00000139926.15	FRMD6	protein_coding	3603.78	-0.193804	0.0577284	-3.35718	0.000787433	0.013356
ENSG00000172354.9	GNB2	protein_coding	14993.6	-0.12597	0.0375772	-3.35229	0.000801458	0.0134784
ENSG00000277586.2	NEFL	protein_coding	12057	-0.127225	0.0379524	-3.35223	0.000801633	0.0134784
ENSG00000186298.11	PPP1CC	protein_coding	20895.2	0.111345	0.0332012	3.35365	0.000797538	0.0134784
ENSG00000127481.14	UBR4	protein_coding	15909	-0.139437	0.0415962	-3.35215	0.000801858	0.0134784
ENSG00000120837.7	NFYB	protein_coding	1888.89	0.249838	0.0745577	3.35094	0.000805384	0.0135073
ENSG00000148834.12	GSTO1	protein_coding	2852.57	0.214719	0.0641897	3.34507	0.000822619	0.0137655
ENSG00000106665.15	CLIP2	protein_coding	7770.3	-0.15494	0.0463751	-3.34102	0.000834699	0.0137827
ENSG00000103966.10	EHD4	protein_coding	7952.39	-0.138463	0.0414206	-3.34286	0.000829184	0.0137827
ENSG00000139163.15	ETNK1	protein_coding	3122	0.213733	0.0639709	3.3411	0.000834481	0.0137827
ENSG00000115677.16	HDLBP	protein_coding	48455	-0.0994378	0.02974	-3.34357	0.000827075	0.0137827
ENSG00000123143.12	PKN1	protein_coding	11569.1	-0.14813	0.0443302	-3.34151	0.000833249	0.0137827
ENSG00000182704.7	TSKU	protein_coding	3085.68	-0.197815	0.0591764	-3.34281	0.000829337	0.0137827
ENSG00000132024.17	CC2D1A	protein_coding	3557.88	-0.190716	0.0571142	-3.33921	0.000840165	0.0138424
ENSG00000175416.12	CLTB	protein_coding	5487.36	-0.187643	0.0562105	-3.33821	0.000843193	0.0138617
ENSG00000099331.13	MYO9B	protein_coding	9574.14	-0.134797	0.0404926	-3.32893	0.000871791	0.014238
ENSG00000183010.16	PYCR1	protein_coding	8035.86	-0.144333	0.0433524	-3.32929	0.000870663	0.014238
ENSG00000180900.18	SCRIB	protein_coding	9730.58	-0.143624	0.0431346	-3.32968	0.000869472	0.014238
ENSG00000117713.19	ARID1A	protein_coding	8276.34	-0.144149	0.0433278	-3.32695	0.000878035	0.0143087
ENSG00000081913.13	PHLPP1	protein_coding	5379.43	-0.163462	0.0491576	-3.32526	0.000883367	0.0143643
ENSG00000101843.18	PSMD10	protein_coding	4224.96	0.177155	0.0533127	3.32293	0.000890769	0.0144533
ENSG00000000419.12	DPM1	protein_coding	5839.45	0.155766	0.0469118	3.3204	0.000898888	0.0145381
ENSG00000183779.6	ZNF703	protein_coding	2691.38	-0.206167	0.0620967	-3.32009	0.000899885	0.0145381
ENSG00000130202.9	NECTIN2	protein_coding	3658.5	-0.191603	0.0578946	-3.30952	0.00093457	0.0150659
ENSG00000177105.9	RHOG	protein_coding	2063.73	-0.23336	0.0705619	-3.30716	0.000942473	0.0151606
ENSG00000099904.15	ZDHHC8	protein_coding	2616.25	-0.214684	0.0649287	-3.30647	0.00094481	0.0151656
ENSG00000128340.14	RAC2	protein_coding	2906.44	-0.200973	0.0608227	-3.30425	0.000952322	0.0152535
ENSG00000255346.9	NOX5	protein_coding	20519.7	0.111189	0.0336802	3.30131	0.000962336	0.0153481
ENSG00000142409.5	ZNF787	protein_coding	3937.92	-0.195723	0.0592804	-3.30165	0.000961185	0.0153481
ENSG00000137166.14	FOXP4	protein_coding	2572.97	-0.210534	0.0637971	-3.30005	0.000966661	0.0153843
ENSG00000162298.18	SYVN1	protein_coding	3769.31	-0.178422	0.0541205	-3.29676	0.000978056	0.0155326
ENSG00000104853.15	CLPTM1	protein_coding	7407.25	-0.142537	0.0432527	-3.29544	0.000982667	0.0155728
ENSG00000086015.20	MAST2	protein_coding	5502.18	-0.155161	0.0471432	-3.29128	0.000997336	0.0157718
ENSG00000140350.15	ANP32A	protein_coding	9334.15	0.135036	0.0410673	3.28816	0.00100844	0.0158469
ENSG00000169718.17	DUS1L	protein_coding	5076.26	-0.171559	0.0521588	-3.28917	0.00100482	0.0158469
ENSG00000198408.13	MGEA5	protein_coding	9344.03	0.138708	0.04218	3.28847	0.00100734	0.0158469
ENSG00000277117.4	CH507-9B2.1	protein_coding	1680.51	-0.266556	0.0811006	-3.28674	0.00101355	0.0158939
ENSG00000188529.14	SRSF10	protein_coding	6352.17	0.149178	0.0454124	3.28497	0.00101993	0.0159604
ENSG00000161638.10	ITGA5	protein_coding	2549.12	-0.208836	0.063608	-3.28316	0.00102649	0.0159992
ENSG00000179010.14	MRFAP1	protein_coding	14783.5	0.124719	0.037988	3.28311	0.00102669	0.0159992
ENSG00000173456.4	RNF26	protein_coding	8888.41	-0.141016	0.0429866	-3.28047	0.00103635	0.0161162
ENSG00000134590.13	FAM127A	protein_coding	4804.68	-0.17679	0.0539126	-3.27919	0.00104106	0.0161558
ENSG00000089048.14	ESF1	protein_coding	3733.46	0.190918	0.0582635	3.2768	0.00104992	0.0162596
ENSG00000213563.6	C8orf82	protein_coding	3180.24	-0.217185	0.0663071	-3.27544	0.00105499	0.0162707
ENSG00000136699.19	SMPD4	protein_coding	7767.88	-0.143808	0.0439035	-3.27555	0.00105456	0.0162707
ENSG00000198792.12	TMEM184B	protein_coding	7167.67	-0.147381	0.0450197	-3.2737	0.00106151	0.0163376
ENSG00000198055.10	GRK6	protein_coding	5620.73	-0.167329	0.0511234	-3.27305	0.00106394	0.0163415
ENSG00000104408.9	EIF3E	protein_coding	21586.1	0.123476	0.037749	3.27097	0.0010718	0.0163948
ENSG00000177963.14	RIC8A	protein_coding	7461.13	-0.140057	0.0428181	-3.27098	0.00107175	0.0163948
ENSG00000182809.10	CRIP2	protein_coding	3802.6	-0.183609	0.0562145	-3.26623	0.0010899	0.0166377
ENSG00000198752.10	CDC42BPB	protein_coding	7689.06	-0.14274	0.0437197	-3.26488	0.0010951	0.0166556
ENSG00000066248.14	NGEF	protein_coding	3633.14	-0.18536	0.056776	-3.26477	0.00109553	0.0166556
ENSG00000129128.12	SPCS3	protein_coding	4452.22	0.168805	0.0517792	3.26009	0.00111378	0.0168646
ENSG00000166575.16	TMEM135	protein_coding	2134.03	0.230878	0.0708109	3.26049	0.0011122	0.0168646
ENSG00000106066.14	CPVL	protein_coding	1578.53	0.256657	0.0787865	3.25763	0.00112348	0.016977
ENSG00000115641.18	FHL2	protein_coding	1768.46	-0.242253	0.074437	-3.25446	0.00113607	0.0171327
ENSG00000148660.20	CAMK2G	protein_coding	7877.28	-0.137365	0.0422704	-3.24967	0.00115538	0.0173888
ENSG00000177303.9	CASKIN2	protein_coding	2860.59	-0.202914	0.062494	-3.24693	0.00116657	0.0175074
ENSG00000142188.16	TMEM50B	protein_coding	1927.61	0.237245	0.073075	3.2466	0.00116794	0.0175074
ENSG00000197879.15	MYO1C	protein_coding	12170.9	-0.120661	0.0371834	-3.24501	0.00117446	0.0175699
ENSG00000088247.17	KHSRP	protein_coding	24832.5	-0.103241	0.0318273	-3.24378	0.00117954	0.0175756
ENSG00000186468.12	RPS23	protein_coding	30261.7	0.108259	0.0333739	3.24382	0.00117938	0.0175756
ENSG00000029153.14	ARNTL2	protein_coding	5264.85	-0.161402	0.0497853	-3.24195	0.00118715	0.0176508
ENSG00000132153.14	DHX30	protein_coding	7235.15	-0.151584	0.0467644	-3.24143	0.00118931	0.0176508
ENSG00000140905.10	GCSH	protein_coding	2841.01	0.209675	0.0647487	3.23828	0.00120252	0.0178115
ENSG00000159363.17	ATP13A2	protein_coding	2635.57	-0.20367	0.0629263	-3.23665	0.00120942	0.0178784
ENSG00000104412.7	EMC2	protein_coding	2120.23	0.226115	0.0699044	3.23463	0.00121799	0.0179696
ENSG00000213639.9	PPP1CB	protein_coding	10609.9	0.130657	0.0404288	3.23179	0.00123017	0.0180791
ENSG00000135316.17	SYNCRIP	protein_coding	14095.4	0.120232	0.037203	3.23177	0.00123025	0.0180791
ENSG00000124145.6	SDC4	protein_coding	5019.25	0.182348	0.0564974	3.22755	0.00124856	0.0183122
ENSG00000181704.11	YIPF6	protein_coding	4723.75	0.165096	0.0511721	3.22629	0.00125407	0.018357
ENSG00000100243.20	CYB5R3	protein_coding	9448.33	-0.133346	0.0413432	-3.22534	0.00125823	0.0183819
ENSG00000129514.5	FOXA1	protein_coding	5853.01	-0.154257	0.0478544	-3.22346	0.00126652	0.018467
ENSG00000075415.12	SLC25A3	protein_coding	19837.3	0.115112	0.035742	3.22062	0.00127912	0.0186145
ENSG00000119820.10	YIPF4	protein_coding	2551.5	0.204352	0.0635175	3.21725	0.00129427	0.0187983
ENSG00000172819.16	RARG	protein_coding	2112.56	-0.222588	0.0692458	-3.21446	0.00130692	0.0189453
ENSG00000114554.11	PLXNA1	protein_coding	6940.38	-0.151066	0.0470356	-3.21173	0.0013194	0.0190891
ENSG00000132780.16	NASP	protein_coding	7147.72	0.138338	0.0431132	3.20871	0.00133333	0.0192535
ENSG00000145495.15	MARCH6	protein_coding	9850.11	0.136633	0.0426107	3.20654	0.00134342	0.0193618
ENSG00000136682.14	CBWD2	protein_coding	1240.56	0.281765	0.0880258	3.20094	0.00136979	0.0196661
ENSG00000197565.15	COL4A6	protein_coding	1349.11	0.281163	0.0878313	3.20117	0.00136871	0.0196661
ENSG00000176973.7	FAM89B	protein_coding	2340.68	-0.240434	0.075175	-3.19832	0.00138232	0.0198079
ENSG00000171206.14	TRIM8	protein_coding	5979.64	-0.155251	0.0485643	-3.19682	0.00138952	0.019873
ENSG00000143294.14	PRCC	protein_coding	3454.48	-0.178888	0.0560072	-3.19401	0.00140311	0.0200291
ENSG00000197150.12	ABCB8	protein_coding	2290.43	-0.216921	0.0679978	-3.19013	0.00142211	0.0202616
ENSG00000089159.16	PXN	protein_coding	37557.3	-0.0969177	0.0304102	-3.18701	0.00143751	0.0204422
ENSG00000255302.4	EID1	protein_coding	10446.5	0.12249	0.0384555	3.18523	0.0014464	0.0205078
ENSG00000173726.10	TOMM20	protein_coding	7321.65	0.140366	0.0440711	3.18499	0.00144761	0.0205078
ENSG00000108639.7	SYNGR2	protein_coding	10763.9	-0.131868	0.041456	-3.18092	0.00146809	0.0207587
ENSG00000147419.17	CCDC25	protein_coding	2167.22	0.222675	0.0700823	3.17733	0.00148636	0.020922
ENSG00000204262.11	COL5A2	protein_coding	14235.8	0.112257	0.0353341	3.17701	0.00148803	0.020922
ENSG00000105245.9	NUMBL	protein_coding	1449.29	-0.276998	0.0871599	-3.17805	0.0014827	0.020922
ENSG00000149948.13	HMGA2	protein_coding	5672.67	0.166195	0.0523314	3.17582	0.00149412	0.0209288
ENSG00000112378.11	PERP	protein_coding	6963.68	0.145056	0.0456707	3.17614	0.00149249	0.0209288
ENSG00000170144.20	HNRNPA3	protein_coding	19717.1	0.124767	0.0393139	3.17361	0.00150557	0.0210498
ENSG00000131591.17	C1orf159	protein_coding	1556.9	-0.262958	0.0829036	-3.17185	0.00151471	0.0211253
ENSG00000164031.16	DNAJB14	protein_coding	2018.44	0.226415	0.0714029	3.17095	0.00151944	0.0211253
ENSG00000012660.13	ELOVL5	protein_coding	11635.7	0.124001	0.0391011	3.17129	0.00151763	0.0211253
ENSG00000123575.8	FAM199X	protein_coding	7252.66	0.149394	0.0471242	3.17022	0.00152323	0.0211387
ENSG00000121741.16	ZMYM2	protein_coding	4621.01	0.169542	0.0534936	3.16939	0.00152758	0.0211598
ENSG00000131171.12	SH3BGRL	protein_coding	3948.21	0.172638	0.0545394	3.16538	0.0015488	0.021414
ENSG00000104164.10	BLOC1S6	protein_coding	3622.34	0.174587	0.0552247	3.1614	0.0015701	0.0216686
ENSG00000133983.14	COX16	protein_coding	7159.17	0.137327	0.0434509	3.1605	0.00157497	0.0216958
ENSG00000115758.12	ODC1	protein_coding	56010.6	-0.0982831	0.0311217	-3.15802	0.00158843	0.0218409
ENSG00000183963.18	SMTN	protein_coding	5445.93	-0.179882	0.0569895	-3.1564	0.00159732	0.0219228
ENSG00000029993.14	HMGB3	protein_coding	7211.22	0.137617	0.0436071	3.15584	0.00160038	0.0219247
ENSG00000171223.5	JUNB	protein_coding	2722.18	-0.205846	0.0653151	-3.15158	0.00162387	0.0221249
ENSG00000142599.17	RERE	protein_coding	5000.37	-0.15848	0.0502688	-3.15265	0.00161798	0.0221249
ENSG00000141574.7	SECTM1	protein_coding	3191.62	-0.201997	0.0640889	-3.15183	0.00162249	0.0221249
ENSG00000172216.5	CEBPB	protein_coding	3789.98	-0.194505	0.0617316	-3.15081	0.00162818	0.0221433
ENSG00000127666.9	TICAM1	protein_coding	1532.94	-0.249978	0.0794745	-3.14539	0.00165865	0.0225167
ENSG00000204463.12	BAG6	protein_coding	13366.1	-0.113739	0.0361682	-3.14471	0.00166252	0.0225283
ENSG00000141867.17	BRD4	protein_coding	6101.52	-0.146819	0.0466975	-3.14405	0.00166628	0.0225385
ENSG00000185033.14	SEMA4B	protein_coding	4288.33	-0.169449	0.0539643	-3.14003	0.00168932	0.0228089
ENSG00000100519.11	PSMC6	protein_coding	5892.28	0.161071	0.0514037	3.13346	0.00172761	0.0232838
ENSG00000105887.10	MTPN	protein_coding	21775	0.131926	0.0421204	3.13212	0.00173546	0.0233476
ENSG00000173327.7	MAP3K11	protein_coding	7417.28	-0.145743	0.0466104	-3.12684	0.00176696	0.0236909
ENSG00000081154.11	PCNP	protein_coding	9971.47	0.1222	0.0390884	3.12625	0.00177049	0.0236909
ENSG00000124783.12	SSR1	protein_coding	14167.7	0.115546	0.0369576	3.12646	0.00176925	0.0236909
ENSG00000175567.8	UCP2	protein_coding	1398.18	-0.26219	0.0839086	-3.1247	0.00177984	0.0237735
ENSG00000172757.12	CFL1	protein_coding	43389.3	-0.094366	0.0302169	-3.12295	0.00179047	0.023873
ENSG00000168209.4	DDIT4	protein_coding	3546.53	0.179947	0.057637	3.12207	0.00179583	0.0239018
ENSG00000161013.16	MGAT4B	protein_coding	7354.62	-0.137298	0.0439888	-3.1212	0.00180117	0.0239303
ENSG00000099797.14	TECR	protein_coding	5908.06	-0.146574	0.0469986	-3.11869	0.00181659	0.0240924
ENSG00000006468.13	ETV1	protein_coding	5806.35	0.162547	0.0521734	3.11552	0.00183621	0.0243094
ENSG00000196497.16	IPO4	protein_coding	7454.7	-0.135353	0.043477	-3.1132	0.00185072	0.0243721
ENSG00000073350.13	LLGL2	protein_coding	1265.96	-0.272705	0.0875863	-3.11356	0.00184848	0.0243721
ENSG00000108518.7	PFN1	protein_coding	41081.6	-0.109511	0.0351742	-3.11339	0.0018495	0.0243721
ENSG00000161682.14	FAM171A2	protein_coding	1674.42	-0.250244	0.0804127	-3.11199	0.00185828	0.0244287
ENSG00000174903.15	RAB1B	protein_coding	16443	-0.106516	0.0342393	-3.11093	0.00186501	0.0244742
ENSG00000137876.9	RSL24D1	protein_coding	4011.88	0.168977	0.0543704	3.10789	0.0018843	0.0246586
ENSG00000205133.11	TRIQK	protein_coding	3903.58	0.170221	0.0547743	3.10767	0.00188566	0.0246586
ENSG00000197785.13	ATAD3A	protein_coding	12118.8	-0.139983	0.045057	-3.10681	0.0018912	0.024688
ENSG00000148337.20	CIZ1	protein_coding	5597.37	-0.153471	0.0494552	-3.10323	0.00191421	0.0249448
ENSG00000135535.16	CD164	protein_coding	21268.4	0.106291	0.0343286	3.09628	0.00195962	0.0254921
ENSG00000185201.16	IFITM2	protein_coding	2705.92	-0.197527	0.0639027	-3.09107	0.0019944	0.0258546
ENSG00000185728.16	YTHDF3	protein_coding	5638.65	0.146971	0.0475404	3.0915	0.0019915	0.0258546
ENSG00000100280.16	AP1B1	protein_coding	7669.8	-0.137949	0.0446771	-3.08769	0.0020172	0.0261049
ENSG00000178950.16	GAK	protein_coding	3325.16	-0.178446	0.0578099	-3.08677	0.00202345	0.0261406
ENSG00000168528.11	SERINC2	protein_coding	1457.74	-0.251543	0.0815236	-3.08552	0.00203194	0.026205
ENSG00000203485.12	INF2	protein_coding	6822.43	-0.153335	0.0497198	-3.08397	0.00204258	0.0262969
ENSG00000105137.12	SYDE1	protein_coding	3360.81	-0.175419	0.0569046	-3.08269	0.0020514	0.026365
ENSG00000090520.11	DNAJB11	protein_coding	6020.75	0.140741	0.045675	3.08136	0.00206057	0.0264112
ENSG00000105723.11	GSK3A	protein_coding	3442.18	-0.173024	0.0561558	-3.08115	0.00206205	0.0264112
ENSG00000157800.17	SLC37A3	protein_coding	5197.48	0.151366	0.0491362	3.08054	0.00206627	0.02642
ENSG00000125257.14	ABCC4	protein_coding	5861.32	0.147714	0.0479856	3.0783	0.00208187	0.0265406
ENSG00000104660.17	LEPROTL1	protein_coding	2511.86	0.200986	0.0652941	3.07816	0.0020828	0.0265406
ENSG00000162385.10	MAGOH	protein_coding	1555.07	0.244464	0.0795073	3.07474	0.00210685	0.0268014
ENSG00000214655.10	ZSWIM8	protein_coding	5519.78	-0.1605	0.0522197	-3.07355	0.00211529	0.0268631
ENSG00000196576.14	PLXNB2	protein_coding	11232.5	-0.135149	0.0439815	-3.07286	0.00212015	0.0268792
ENSG00000113758.13	DBN1	protein_coding	11596.7	-0.1262	0.0411009	-3.0705	0.00213704	0.0270475
ENSG00000023171.17	GRAMD1B	protein_coding	14539.1	0.107555	0.0350616	3.0676	0.00215782	0.0272644
ENSG00000184575.11	XPOT	protein_coding	14231.9	0.112833	0.036789	3.06703	0.00216194	0.0272704
ENSG00000102580.14	DNAJC3	protein_coding	4796.28	0.171959	0.0561219	3.06403	0.00218379	0.0274995
ENSG00000171055.14	FEZ2	protein_coding	5606.33	0.150004	0.0489778	3.06269	0.00219357	0.0275763
ENSG00000013588.7	GPRC5A	protein_coding	7674.68	-0.150039	0.049032	-3.06002	0.00221326	0.0277502
ENSG00000141905.18	NFIC	protein_coding	5387.4	-0.147809	0.0483066	-3.0598	0.00221482	0.0277502
ENSG00000179222.17	MAGED1	protein_coding	16060.3	-0.10664	0.0348959	-3.05596	0.00224344	0.0280379
ENSG00000102226.9	USP11	protein_coding	4116.22	-0.159755	0.052281	-3.05571	0.00224528	0.0280379
ENSG00000011304.19	PTBP1	protein_coding	22859.1	-0.100345	0.0328521	-3.05446	0.00225463	0.0281077
ENSG00000119638.12	NEK9	protein_coding	2819.41	0.190576	0.062411	3.05356	0.00226143	0.0281455
ENSG00000160753.15	RUSC1	protein_coding	3571.18	-0.170862	0.0560097	-3.05058	0.00228401	0.0283794
ENSG00000128283.6	CDC42EP1	protein_coding	4516.89	-0.160342	0.0526116	-3.04766	0.00230632	0.0286091
ENSG00000116171.17	SCP2	protein_coding	9336.89	0.122339	0.0401518	3.04692	0.002312	0.0286321
ENSG00000168615.11	ADAM9	protein_coding	16862.6	0.106178	0.0348815	3.04397	0.00233479	0.0288189
ENSG00000067704.9	IARS2	protein_coding	21241.8	0.0987458	0.0324386	3.04408	0.00233392	0.0288189
ENSG00000261221.3	ZNF865	protein_coding	1943.24	-0.231818	0.0761889	-3.04268	0.00234483	0.0288952
ENSG00000160209.18	PDXK	protein_coding	11155.5	-0.117736	0.0387198	-3.0407	0.00236026	0.0290374
ENSG00000110871.14	COQ5	protein_coding	2148.69	0.215971	0.0710979	3.03766	0.00238423	0.0291146
ENSG00000130816.15	DNMT1	protein_coding	18500.1	-0.104331	0.0343397	-3.03821	0.0023799	0.0291146
ENSG00000106348.16	IMPDH1	protein_coding	9719.4	-0.132356	0.0435646	-3.03815	0.00238035	0.0291146
ENSG00000173457.10	PPP1R14B	protein_coding	16607.8	-0.142005	0.0467498	-3.03755	0.00238513	0.0291146
ENSG00000171992.12	SYNPO	protein_coding	2033.27	-0.212465	0.0699488	-3.03744	0.002386	0.0291146
ENSG00000106080.10	FKBP14	protein_coding	3549.23	0.179122	0.059046	3.0336	0.00241659	0.0293443
ENSG00000162430.16	SEPN1	protein_coding	10221.4	-0.124975	0.0411956	-3.03369	0.00241583	0.0293443
ENSG00000108953.16	YWHAE	protein_coding	28700.1	0.102662	0.0338386	3.03386	0.00241447	0.0293443
ENSG00000188643.10	S100A16	protein_coding	17042.6	-0.123468	0.0407213	-3.03203	0.00242918	0.0294494
ENSG00000130475.14	FCHO1	protein_coding	2051.2	-0.224312	0.073996	-3.03141	0.00243416	0.0294619
ENSG00000063660.8	GPC1	protein_coding	5872.6	-0.16094	0.0531178	-3.02986	0.00244663	0.0295493
ENSG00000112972.14	HMGCS1	protein_coding	2843.53	0.198594	0.0655524	3.02954	0.00244927	0.0295493
ENSG00000155380.11	SLC16A1	protein_coding	11701.6	0.1152	0.0380364	3.02868	0.00245622	0.0295853
ENSG00000154518.9	ATP5G3	protein_coding	9422.2	0.132939	0.0439191	3.02691	0.00247066	0.0296229
ENSG00000099622.13	CIRBP	protein_coding	5237.38	0.162942	0.0538409	3.02636	0.00247518	0.0296229
ENSG00000111145.7	ELK3	protein_coding	2625.57	0.195379	0.064549	3.02684	0.00247127	0.0296229
ENSG00000168159.11	RNF187	protein_coding	9315.19	-0.128935	0.0426034	-3.02639	0.00247493	0.0296229
ENSG00000233276.4	GPX1	polymorphic_pseudogene	6756.05	-0.151671	0.0501421	-3.02482	0.0024878	0.0297264
ENSG00000177731.15	FLII	protein_coding	13125.3	-0.122868	0.0406669	-3.02133	0.00251664	0.0300231
ENSG00000007376.7	RPUSD1	protein_coding	3306.55	-0.196598	0.0651015	-3.01987	0.0025288	0.0301201
ENSG00000071894.16	CPSF1	protein_coding	12950.6	-0.123459	0.0409426	-3.0154	0.00256637	0.030519
ENSG00000152620.12	NADK2	protein_coding	2137.27	0.210961	0.0699776	3.01469	0.00257239	0.030542
ENSG00000172725.13	CORO1B	protein_coding	4919.78	-0.153621	0.0510116	-3.01149	0.00259973	0.0307962
ENSG00000173039.18	RELA	protein_coding	5426.77	-0.146436	0.0486303	-3.01122	0.00260203	0.0307962
ENSG00000204435.13	CSNK2B	protein_coding	6205.07	-0.137199	0.0455783	-3.01018	0.00261097	0.0308045
ENSG00000182446.13	NPLOC4	protein_coding	10653.5	-0.115138	0.0382463	-3.01044	0.00260872	0.0308045
ENSG00000070047.11	PHRF1	protein_coding	5089.46	-0.147691	0.0490843	-3.00893	0.00262174	0.0308566
ENSG00000088836.13	SLC4A11	protein_coding	3543.86	-0.174856	0.0581168	-3.0087	0.00262364	0.0308566
ENSG00000168078.9	PBK	protein_coding	3456.56	0.178122	0.0592173	3.00794	0.00263025	0.0308858
ENSG00000153944.10	MSI2	protein_coding	5496.86	0.151661	0.0504471	3.00633	0.00264423	0.0310014
ENSG00000108175.16	ZMIZ1	protein_coding	8803.02	-0.13555	0.0451142	-3.0046	0.00265933	0.0311296
ENSG00000099875.14	MKNK2	protein_coding	4621.48	-0.151824	0.050574	-3.00202	0.00268194	0.0313451
ENSG00000113811.10	RP11-884K10.5	protein_coding	1506	0.248067	0.0826737	3.00056	0.00269487	0.0314472
ENSG00000099917.17	MED15	protein_coding	2913.67	-0.186911	0.0623472	-2.99791	0.00271837	0.031672
ENSG00000110651.11	CD81	protein_coding	11129.7	-0.115668	0.0386042	-2.99625	0.00273322	0.0317285
ENSG00000054598.7	FOXC1	protein_coding	1932.54	-0.233577	0.0779421	-2.99679	0.00272834	0.0317285
ENSG00000126464.13	PRR12	protein_coding	5017.57	-0.145388	0.0485281	-2.99595	0.00273594	0.0317285
ENSG00000075239.13	ACAT1	protein_coding	7316.03	0.145152	0.048486	2.99369	0.00275626	0.0318653
ENSG00000174791.10	RIN1	protein_coding	3067.99	-0.195749	0.0653867	-2.99371	0.00275608	0.0318653
ENSG00000196850.5	PPTC7	protein_coding	3930.23	0.160314	0.053565	2.99288	0.00276358	0.0319005
ENSG00000169727.12	GPS1	protein_coding	7173.6	-0.150417	0.0503396	-2.98804	0.0028077	0.0323101
ENSG00000178719.16	GRINA	protein_coding	11333	-0.113603	0.0380163	-2.98828	0.00280555	0.0323101
ENSG00000243147.7	MRPL33	protein_coding	1433.37	0.246847	0.0826577	2.98638	0.00282305	0.0324368
ENSG00000181104.6	F2R	protein_coding	12012.1	0.112857	0.037806	2.98517	0.0028342	0.032515
ENSG00000046604.12	DSG2	protein_coding	3691.48	-0.169848	0.0569144	-2.98427	0.00284256	0.0325611
ENSG00000197858.10	GPAA1	protein_coding	5746.82	-0.155439	0.0521121	-2.98279	0.00285635	0.032669
ENSG00000104695.12	PPP2CB	protein_coding	2141.84	0.217466	0.072921	2.98221	0.00286172	0.0326804
ENSG00000185262.8	UBALD2	protein_coding	2065.76	-0.209178	0.0702469	-2.97776	0.00290367	0.033109
ENSG00000168255.20	RP11-514P8.12	protein_coding	2585.99	-0.189439	0.0636392	-2.97676	0.0029131	0.0331154
ENSG00000103978.15	TMEM87A	protein_coding	4241.12	0.154184	0.0517936	2.97689	0.0029119	0.0331154
ENSG00000068308.13	OTUD5	protein_coding	3222.89	-0.171423	0.057641	-2.97398	0.00293965	0.0333665
ENSG00000111530.12	CAND1	protein_coding	7637.36	0.132597	0.0446428	2.97017	0.00297635	0.033732
ENSG00000123064.12	DDX54	protein_coding	9134.08	-0.127831	0.0430504	-2.96934	0.00298441	0.0337721
ENSG00000110492.15	MDK	protein_coding	7387.67	-0.145256	0.0489639	-2.96659	0.00301122	0.0340241
ENSG00000197102.11	DYNC1H1	protein_coding	66506.6	-0.10573	0.0356595	-2.965	0.00302682	0.034098
ENSG00000172731.13	LRRC20	protein_coding	2872.44	-0.193668	0.0653183	-2.96499	0.00302688	0.034098
ENSG00000135451.12	TROAP	protein_coding	1780.83	-0.232872	0.0785596	-2.96427	0.00303401	0.0341269
ENSG00000069345.11	DNAJA2	protein_coding	4443.75	0.160361	0.0541492	2.96146	0.00306187	0.0342343
ENSG00000116786.12	PLEKHM2	protein_coding	4498.62	-0.151538	0.0511663	-2.96167	0.00305974	0.0342343
ENSG00000166851.14	PLK1	protein_coding	6926.62	-0.142852	0.0482246	-2.96222	0.00305432	0.0342343
ENSG00000118181.10	RPS25	protein_coding	24772	0.0966228	0.0326226	2.96184	0.00305807	0.0342343
ENSG00000109062.11	SLC9A3R1	protein_coding	6180.37	-0.146782	0.0495759	-2.96076	0.00306885	0.0342612
ENSG00000164687.10	FABP5	protein_coding	8312.16	0.135533	0.0457957	2.9595	0.00308135	0.0342984
ENSG00000139372.14	TDG	protein_coding	1855.68	0.219043	0.074005	2.95984	0.00307797	0.0342984
ENSG00000105810.9	CDK6	protein_coding	1913.25	0.221915	0.0750135	2.95834	0.00309302	0.0343261
ENSG00000150990.7	DHX37	protein_coding	4102.09	-0.163508	0.0552681	-2.95845	0.00309192	0.0343261
ENSG00000160072.19	ATAD3B	protein_coding	5393.51	-0.160607	0.0543058	-2.95745	0.00310192	0.0343739
ENSG00000104131.12	EIF3J	protein_coding	7447.01	0.128364	0.0434192	2.95638	0.00311275	0.0344428
ENSG00000162302.12	RPS6KA4	protein_coding	7195.63	-0.132758	0.0449626	-2.95262	0.0031509	0.0348135
ENSG00000168079.16	SCARA5	protein_coding	1535.09	0.24518	0.0830544	2.95204	0.00315677	0.0348269
ENSG00000148396.18	SEC16A	protein_coding	7064.02	-0.133994	0.0454179	-2.95025	0.00317513	0.0349778
ENSG00000130402.11	ACTN4	protein_coding	36935.9	-0.0929887	0.0315329	-2.94894	0.00318861	0.0350747
ENSG00000134531.9	EMP1	protein_coding	7560.35	0.129764	0.0440862	2.94341	0.00324619	0.0356034
ENSG00000196923.13	PDLIM7	protein_coding	3250.19	-0.18392	0.0624833	-2.94351	0.00324514	0.0356034
ENSG00000167779.7	IGFBP6	protein_coding	3378.18	-0.183136	0.0623161	-2.93882	0.00329463	0.0360817
ENSG00000064666.14	CNN2	protein_coding	4445.09	-0.149105	0.0508304	-2.93338	0.00335292	0.0364255
ENSG00000189403.14	HMGB1	protein_coding	31813.3	0.103736	0.0353396	2.93541	0.00333106	0.0364255
ENSG00000111897.6	SERINC1	protein_coding	5590.92	0.14233	0.0485319	2.93272	0.00336011	0.0364255
ENSG00000173638.18	SLC19A1	protein_coding	4158.39	-0.165897	0.056566	-2.9328	0.0033592	0.0364255
ENSG00000111371.15	SLC38A1	protein_coding	34693.2	0.102184	0.0348213	2.93453	0.00334051	0.0364255
ENSG00000215717.5	TMEM167B	protein_coding	3175.78	0.170129	0.0579873	2.9339	0.00334728	0.0364255
ENSG00000109445.10	ZNF330	protein_coding	2090.96	0.20508	0.0699157	2.93325	0.00335432	0.0364255
ENSG00000135698.9	MPHOSPH6	protein_coding	1383.82	0.245764	0.0838334	2.93158	0.00337241	0.036506
ENSG00000125772.12	GPCPD1	protein_coding	3181.2	0.192742	0.0658105	2.92874	0.00340335	0.036601
ENSG00000186480.12	INSIG1	protein_coding	3245.51	0.170151	0.058086	2.9293	0.00339729	0.036601
ENSG00000131828.13	PDHA1	protein_coding	15410	0.105871	0.0361442	2.92913	0.00339917	0.036601
ENSG00000070423.17	RNF126	protein_coding	3293.03	-0.189735	0.06476	-2.92982	0.00339162	0.036601
ENSG00000132485.13	ZRANB2	protein_coding	5695.14	0.14629	0.0499534	2.92853	0.00340566	0.036601
ENSG00000182621.17	PLCB1	protein_coding	4821.05	0.16324	0.0557862	2.92617	0.00343164	0.0368274
ENSG00000203880.11	PCMTD2	protein_coding	2854.79	0.195315	0.0667806	2.92472	0.00344761	0.0368862
ENSG00000164054.15	SHISA5	protein_coding	9920.34	-0.113327	0.0387531	-2.92434	0.00345192	0.0368862
ENSG00000146433.8	TMEM181	protein_coding	2368.44	0.200179	0.0684522	2.92436	0.00345165	0.0368862
ENSG00000140545.14	MFGE8	protein_coding	1554.1	-0.239105	0.0818647	-2.92073	0.0034921	0.0372624
ENSG00000112033.13	PPARD	protein_coding	3384.48	-0.164852	0.0564879	-2.91836	0.00351874	0.0374931
ENSG00000079432.7	CIC	protein_coding	1398.16	-0.251117	0.0861041	-2.91643	0.00354059	0.0376722
ENSG00000152683.14	SLC30A6	protein_coding	3813.24	0.160438	0.0550588	2.91393	0.00356909	0.0379215
ENSG00000104812.14	GYS1	protein_coding	4516.43	-0.159987	0.0549158	-2.91332	0.00357603	0.0379414
ENSG00000125968.8	ID1	protein_coding	4055.24	-0.174056	0.0597831	-2.91146	0.00359742	0.0381143
ENSG00000056586.15	RC3H2	protein_coding	3466.25	0.17367	0.0596842	2.90981	0.00361647	0.0382079
ENSG00000100934.14	SEC23A	protein_coding	18640.1	0.10406	0.0357604	2.90993	0.00361514	0.0382079
ENSG00000100234.11	TIMP3	protein_coding	7035.21	-0.133367	0.0458452	-2.90908	0.00362494	0.0382434
ENSG00000166226.12	CCT2	protein_coding	12083	0.124674	0.0428727	2.908	0.0036375	0.0383218
ENSG00000168906.12	MAT2A	protein_coding	24575.4	0.112628	0.0387492	2.90659	0.00365397	0.0384277
ENSG00000072858.10	SIDT1	protein_coding	4053.91	-0.153564	0.0528391	-2.90626	0.00365782	0.0384277
ENSG00000139343.10	SNRPF	protein_coding	2352.05	0.198563	0.0683331	2.90581	0.00366309	0.038429
ENSG00000068366.19	ACSL4	protein_coding	6013.12	0.147724	0.0508801	2.90337	0.0036917	0.0386209
ENSG00000156531.16	PHF6	protein_coding	3982.26	0.16077	0.0553653	2.9038	0.00368658	0.0386209
ENSG00000168502.17	MTCL1	protein_coding	9529.72	-0.115227	0.0396969	-2.90267	0.00370002	0.0386538
ENSG00000105426.16	PTPRS	protein_coding	7432.54	-0.122925	0.042381	-2.90048	0.00372591	0.03887
ENSG00000170348.8	TMED10	protein_coding	12174.9	0.110119	0.0379778	2.89955	0.00373693	0.0389307
ENSG00000134602.15	STK26	protein_coding	4246.27	0.153402	0.052916	2.89898	0.00374382	0.0389483
ENSG00000182095.14	TNRC18	protein_coding	11620.8	-0.124005	0.0427849	-2.89834	0.00375143	0.0389732
ENSG00000071051.13	NCK2	protein_coding	2590.59	-0.193807	0.0668816	-2.89776	0.00375838	0.0389913
ENSG00000117450.13	PRDX1	protein_coding	30238.5	0.0933676	0.0322267	2.89721	0.00376494	0.0390052
ENSG00000122545.19	SEPT7	protein_coding	13936.7	0.113751	0.0393093	2.89373	0.00380693	0.0393857
ENSG00000259974.2	LINC00261	lincRNA	5421.03	0.160517	0.0555303	2.89062	0.00384482	0.0397228
ENSG00000083720.12	OXCT1	protein_coding	4282.31	0.153572	0.0531846	2.88753	0.0038828	0.0400597
ENSG00000108344.14	PSMD3	protein_coding	9422.89	-0.120836	0.0419343	-2.88157	0.00395703	0.0407694
ENSG00000272333.5	KMT2B	protein_coding	2896.56	-0.18167	0.0630731	-2.88032	0.00397278	0.0408754
ENSG00000114573.9	ATP6V1A	protein_coding	4789.55	0.143771	0.0499325	2.8793	0.00398562	0.0409512
ENSG00000120742.10	SERP1	protein_coding	9566.73	0.116261	0.0404071	2.87725	0.00401156	0.0411611
ENSG00000109654.14	TRIM2	protein_coding	3135.85	0.18388	0.0639501	2.87536	0.00403561	0.0413512
ENSG00000214046.8	SMIM7	protein_coding	2639.9	0.181336	0.0631025	2.87368	0.00405719	0.0415154
ENSG00000123983.13	ACSL3	protein_coding	12566.8	0.110508	0.0384735	2.87232	0.00407467	0.0416374
ENSG00000169756.16	LIMS1	protein_coding	4607.46	0.149776	0.0521662	2.87113	0.00409011	0.0417381
ENSG00000168488.18	ATXN2L	protein_coding	8645.14	-0.12249	0.0426726	-2.87047	0.00409863	0.0417473
ENSG00000031823.14	RANBP3	protein_coding	6022.75	-0.136148	0.0474352	-2.8702	0.00410217	0.0417473
ENSG00000171603.16	CLSTN1	protein_coding	13830.4	-0.101628	0.0354138	-2.86973	0.00410818	0.0417516
ENSG00000142089.15	IFITM3	protein_coding	5562.21	-0.134534	0.0469052	-2.86821	0.00412802	0.0418396
ENSG00000110435.11	PDHX	protein_coding	2783.62	0.177167	0.0617638	2.86846	0.00412481	0.0418396
ENSG00000103495.13	MAZ	protein_coding	9853.73	-0.122538	0.0427915	-2.86361	0.00418842	0.0423902
ENSG00000183291.15	SEP15	protein_coding	8940.62	0.125968	0.0439952	2.86321	0.00419368	0.0423902
ENSG00000137955.15	RABGGTB	protein_coding	3113.4	0.168101	0.0587537	2.86112	0.0042215	0.0426138
ENSG00000164176.12	EDIL3	protein_coding	10173.9	0.119289	0.0417184	2.8594	0.0042445	0.0427882
ENSG00000155368.16	DBI	protein_coding	4558.95	0.149026	0.0521981	2.85501	0.00430354	0.0432524
ENSG00000183495.13	EP400	protein_coding	7734.29	-0.126085	0.0441663	-2.85479	0.00430657	0.0432524
ENSG00000174804.3	FZD4	protein_coding	6837.18	0.129333	0.0453054	2.85469	0.00430789	0.0432524
ENSG00000120802.13	TMPO	protein_coding	8976.79	0.120993	0.0423948	2.85397	0.00431766	0.0432924
ENSG00000002330.13	BAD	protein_coding	3653.72	-0.1647	0.0577244	-2.85321	0.00432806	0.0433144
ENSG00000108064.10	TFAM	protein_coding	7983.11	0.121446	0.0425683	2.85296	0.00433144	0.0433144
ENSG00000132963.7	POMP	protein_coding	4647.1	0.147581	0.0517654	2.85095	0.00435884	0.0434721
ENSG00000197694.15	SPTAN1	protein_coding	19169.4	-0.0938289	0.0329111	-2.85098	0.00435852	0.0434721
ENSG00000167491.17	GATAD2A	protein_coding	7477.25	-0.123223	0.0432379	-2.84989	0.00437346	0.0434961
ENSG00000138777.19	PPA2	protein_coding	3977.86	0.151002	0.0530062	2.84875	0.00438913	0.0434961
ENSG00000213741.10	RPS29	protein_coding	9000.41	0.126051	0.0442492	2.84866	0.00439032	0.0434961
ENSG00000099194.5	SCD	protein_coding	39653.7	0.105646	0.0370783	2.84927	0.0043819	0.0434961
ENSG00000197780.9	TAF13	protein_coding	1501.06	0.231812	0.081363	2.84911	0.00438412	0.0434961
ENSG00000105220.15	GPI	protein_coding	25279.6	-0.0894185	0.0314231	-2.84563	0.00443241	0.043855
ENSG00000108468.14	CBX1	protein_coding	13267.3	0.102721	0.0361146	2.8443	0.00445087	0.0439795
ENSG00000174938.14	SEZ6L2	protein_coding	4843.46	-0.143461	0.0504635	-2.84286	0.00447113	0.0441214
ENSG00000118363.11	SPCS2	protein_coding	6024.32	0.136602	0.048164	2.83619	0.00456556	0.044994
ENSG00000179115.10	FARSA	protein_coding	12656.2	-0.120769	0.0426215	-2.83353	0.0046037	0.0453101
ENSG00000136450.12	SRSF1	protein_coding	21597.6	0.0911862	0.032195	2.83231	0.00462132	0.0454238
ENSG00000105520.10	PLPPR2	protein_coding	4734.38	-0.144016	0.0508805	-2.83048	0.00464787	0.0455809
ENSG00000048392.11	RRM2B	protein_coding	4627.49	0.150783	0.0532733	2.83036	0.0046495	0.0455809
ENSG00000128951.13	DUT	protein_coding	3183.1	0.167469	0.0592627	2.82587	0.00471522	0.0461242
ENSG00000138757.14	G3BP2	protein_coding	7719.12	0.129877	0.0459624	2.82573	0.00471725	0.0461242
ENSG00000164109.13	MAD2L1	protein_coding	3854.02	0.155113	0.0549103	2.82484	0.00473044	0.0461928
ENSG00000155366.16	RHOC	protein_coding	11887.7	-0.12979	0.0459559	-2.82422	0.00473959	0.0462218
ENSG00000140006.11	WDR89	protein_coding	2731.36	0.180284	0.0638644	2.82292	0.0047588	0.0463487
ENSG00000164933.11	SLC25A32	protein_coding	5072.78	0.139845	0.0495485	2.82239	0.0047667	0.0463653
ENSG00000120526.10	NUDCD1	protein_coding	4259.78	0.15973	0.0566146	2.82136	0.00478204	0.0464541
ENSG00000149639.14	SOGA1	protein_coding	7766.99	-0.120376	0.0426852	-2.82009	0.00480107	0.0465785
ENSG00000120805.13	ARL1	protein_coding	6206.5	0.127818	0.0453338	2.81948	0.00481018	0.0466064
ENSG00000166260.11	COX11	protein_coding	5720.1	0.13399	0.047542	2.81835	0.00482714	0.0467102
ENSG00000117676.13	RPS6KA1	protein_coding	5499.93	-0.144669	0.0513484	-2.8174	0.00484142	0.0467878
ENSG00000171680.21	PLEKHG5	protein_coding	3473.81	-0.175669	0.062382	-2.81602	0.00486224	0.0468765
ENSG00000145901.14	TNIP1	protein_coding	9367.26	-0.111102	0.0394542	-2.81596	0.00486312	0.0468765
ENSG00000167775.10	CD320	protein_coding	7774.14	-0.145774	0.0518191	-2.81312	0.0049063	0.0471704
ENSG00000136715.18	SAP130	protein_coding	2961.99	-0.17164	0.0610228	-2.81271	0.00491254	0.0471704
ENSG00000078140.13	UBE2K	protein_coding	5213.26	0.13563	0.0482101	2.81331	0.0049034	0.0471704
ENSG00000000003.14	TSPAN6	protein_coding	3354.9	0.16042	0.0570717	2.81085	0.00494102	0.0473831
ENSG00000145743.15	FBXL17	protein_coding	2853.92	0.178981	0.0637015	2.80968	0.00495908	0.0474954
ENSG00000165512.4	ZNF22	protein_coding	2838.99	0.171833	0.0611833	2.8085	0.00497722	0.0476082
ENSG00000187735.13	TCEA1	protein_coding	4503.95	0.142397	0.0507226	2.80736	0.00499491	0.0477164
ENSG00000142627.12	EPHA2	protein_coding	25038.3	-0.0918132	0.0327335	-2.80487	0.00503369	0.0479963
ENSG00000164543.5	STK17A	protein_coding	6882.14	0.124935	0.0445456	2.80466	0.00503704	0.0479963
ENSG00000186834.3	HEXIM1	protein_coding	5362.56	-0.133038	0.0474665	-2.80277	0.00506665	0.0480946
ENSG00000182195.7	LDOC1	protein_coding	5615.95	-0.137413	0.0490243	-2.80296	0.00506361	0.0480946
ENSG00000179526.16	SHARPIN	protein_coding	2963.49	-0.167412	0.0597193	-2.80331	0.00505803	0.0480946
ENSG00000108582.11	CPD	protein_coding	9972.7	0.123575	0.0441243	2.80061	0.00510061	0.0483186
ENSG00000138668.18	HNRNPD	protein_coding	15686.3	0.0995235	0.0355384	2.80045	0.00510316	0.0483186
ENSG00000104331.8	IMPAD1	protein_coding	4137.4	0.152198	0.054407	2.7974	0.00515159	0.0486539
ENSG00000213672.7	NCKIPSD	protein_coding	1542.09	-0.229063	0.0818813	-2.7975	0.00514991	0.0486539
ENSG00000130640.13	TUBGCP2	protein_coding	4564.67	-0.144876	0.0518007	-2.79679	0.0051613	0.0486842
ENSG00000109861.15	CTSC	protein_coding	17965	0.0972195	0.0347682	2.79622	0.00517036	0.0487082
ENSG00000126254.11	RBM42	protein_coding	3379.1	-0.183641	0.0656844	-2.79582	0.0051769	0.0487084
ENSG00000123505.15	AMD1	protein_coding	6741.62	0.122762	0.043917	2.79531	0.00518498	0.0487232
ENSG00000108946.14	PRKAR1A	protein_coding	31724.4	0.084068	0.030085	2.79435	0.00520037	0.0488065
ENSG00000133657.15	ATP13A3	protein_coding	12621.7	0.107107	0.0383498	2.79289	0.00522392	0.0489661
ENSG00000126822.16	PLEKHG3	protein_coding	3462.51	-0.160516	0.0574908	-2.79203	0.00523784	0.0490351
ENSG00000132313.14	MRPL35	protein_coding	2749.5	0.178929	0.0641071	2.79109	0.00525308	0.0491163
ENSG00000155508.13	CNOT8	protein_coding	1908.97	0.201053	0.0720698	2.7897	0.00527575	0.0492535
ENSG00000166337.9	TAF10	protein_coding	2263.97	-0.195953	0.0702496	-2.78938	0.00528093	0.0492535
ENSG00000258289.8	CHURC1	protein_coding	5418.19	0.135793	0.0487441	2.78583	0.00533906	0.0497337
ENSG00000198856.12	OSTC	protein_coding	2505.5	0.181748	0.06525	2.78541	0.005346	0.0497342
ENSG00000171867.16	PRNP	protein_coding	31488.2	0.0861134	0.0309202	2.78502	0.00535241	0.0497342
ENSG00000132361.16	CLUH	protein_coding	9554.11	-0.114162	0.0410174	-2.78325	0.00538173	0.0499446
ENSG00000120533.12	ENY2	protein_coding	5343.77	0.133751	0.0480747	2.78215	0.00539999	0.050052
ENSG00000003249.13	DBNDD1	protein_coding	1675.69	-0.218625	0.0785961	-2.78162	0.00540882	0.0500717
ENSG00000008838.19	MED24	protein_coding	3451.81	-0.156414	0.0562682	-2.77979	0.00543945	0.050231
ENSG00000231500.6	RPS18	protein_coding	33159.9	0.091255	0.0328263	2.77993	0.00543702	0.050231
ENSG00000087086.14	FTL	protein_coding	29493.9	-0.0867931	0.0312504	-2.77734	0.00548055	0.0505481
ENSG00000122406.13	RPL5	protein_coding	28892	0.111314	0.0400943	2.77632	0.00549787	0.0505831
ENSG00000156521.13	TYSND1	protein_coding	4871.6	-0.141752	0.0510509	-2.77669	0.00549156	0.0505831
ENSG00000172380.5	GNG12	protein_coding	10545.9	0.118084	0.0425399	2.77585	0.00550578	0.0505937
ENSG00000116221.15	MRPL37	protein_coding	7732.02	-0.116616	0.0420205	-2.77522	0.00551641	0.0506291
ENSG00000211772.11	TRBC2	TR_C_gene	1730.42	-0.226269	0.0816144	-2.77242	0.00556416	0.0510048
ENSG00000166348.18	USP54	protein_coding	2884.46	-0.179792	0.064907	-2.77	0.00560562	0.0513219
ENSG00000153933.9	DGKE	protein_coding	2059.95	0.194989	0.0704313	2.7685	0.00563145	0.0513698
ENSG00000104805.15	NUCB1	protein_coding	6236.12	-0.125779	0.0454278	-2.76877	0.00562687	0.0513698
ENSG00000134294.13	SLC38A2	protein_coding	38075.1	0.0912777	0.0329648	2.76894	0.00562385	0.0513698
ENSG00000180008.8	SOCS4	protein_coding	4740.39	0.142426	0.0514642	2.76747	0.00564927	0.0514696
ENSG00000198105.13	ZNF248	protein_coding	8696.31	0.115183	0.0417199	2.76086	0.00576498	0.0524599
ENSG00000064932.15	SBNO2	protein_coding	3461.7	-0.156525	0.0567095	-2.76013	0.00577788	0.0525134
ENSG00000156650.12	KAT6B	protein_coding	5591.38	-0.148911	0.0540068	-2.75727	0.00582865	0.0529106
ENSG00000119787.13	ATL2	protein_coding	4241.11	0.151038	0.0548214	2.75509	0.00586752	0.0531988
ENSG00000214530.8	STARD10	protein_coding	2961.81	-0.182492	0.066266	-2.75393	0.00588843	0.0533238
ENSG00000182979.17	MTA1	protein_coding	5611.75	-0.129506	0.0470381	-2.75322	0.00590116	0.0533333
ENSG00000231925.11	TAPBP	protein_coding	4592.53	-0.140631	0.0510814	-2.75308	0.00590374	0.0533333
ENSG00000125870.10	SNRPB2	protein_coding	5385.61	0.1331	0.048434	2.74806	0.00599484	0.0540909
ENSG00000107984.9	DKK1	protein_coding	50806.7	-0.079073	0.0288056	-2.74505	0.0060501	0.0545076
ENSG00000132740.8	IGHMBP2	protein_coding	1669.18	-0.211237	0.0769642	-2.74461	0.00605824	0.0545076
ENSG00000106460.18	TMEM106B	protein_coding	5472.26	0.141189	0.0514469	2.74436	0.00606288	0.0545076
ENSG00000156735.10	BAG4	protein_coding	1759.59	0.216161	0.0788172	2.74256	0.00609622	0.054676
ENSG00000144381.16	HSPD1	protein_coding	56243	0.109338	0.0398658	2.74265	0.0060946	0.054676
ENSG00000164902.13	PHAX	protein_coding	2986.8	0.164488	0.0600557	2.73892	0.00616407	0.0552183
ENSG00000012174.11	MBTPS2	protein_coding	6141.54	0.129556	0.0473563	2.73578	0.00622326	0.0556818
ENSG00000106635.7	BCL7B	protein_coding	3257.78	-0.156789	0.0573304	-2.73483	0.00624117	0.0557088
ENSG00000189143.9	CLDN4	protein_coding	10552.4	-0.112289	0.0410532	-2.7352	0.00623425	0.0557088
ENSG00000162585.16	FAAP20	protein_coding	3715.54	-0.168878	0.0617745	-2.73378	0.00626123	0.0558212
ENSG00000139644.12	TMBIM6	protein_coding	17859	-0.0972455	0.0355789	-2.73323	0.00627159	0.055847
ENSG00000121900.18	TMEM54	protein_coding	2058.59	-0.22441	0.0821493	-2.73173	0.00630027	0.0560357
ENSG00000185090.14	MANEAL	protein_coding	3074.18	-0.162667	0.0596088	-2.72891	0.00635443	0.0563165
ENSG00000240972.1	MIF	protein_coding	12465.3	-0.125399	0.0459495	-2.72905	0.0063517	0.0563165
ENSG00000030066.13	NUP160	protein_coding	6827.63	0.119952	0.043949	2.72936	0.00634578	0.0563165
ENSG00000136802.11	LRRC8A	protein_coding	3575.31	-0.152373	0.0558631	-2.72762	0.0063793	0.05647
ENSG00000164897.12	TMUB1	protein_coding	3257.85	-0.174266	0.0639206	-2.72629	0.00640507	0.0566311
ENSG00000110046.12	ATG2A	protein_coding	2753.58	-0.167661	0.0615161	-2.72549	0.00642063	0.0567017
ENSG00000185122.10	HSF1	protein_coding	6416.44	-0.129023	0.0473726	-2.72359	0.00645772	0.0569619
ENSG00000008441.16	NFIX	protein_coding	17499.8	-0.0939824	0.0345542	-2.71985	0.00653108	0.0575412
ENSG00000206432.4	TMEM200C	protein_coding	2100.99	-0.188807	0.0694397	-2.719	0.00654797	0.0576221
ENSG00000116521.10	SCAMP3	protein_coding	5154.71	-0.148879	0.0547644	-2.71853	0.00655722	0.0576357
ENSG00000255717.6	SNHG1	processed_transcript	5178.2	0.139176	0.0512124	2.71762	0.00657523	0.0577262
ENSG00000165458.13	INPPL1	protein_coding	8743.07	-0.109412	0.0402718	-2.71683	0.00659099	0.0577967
ENSG00000182473.21	EXOC7	protein_coding	11775.3	-0.104799	0.0385912	-2.71562	0.00661512	0.0578019
ENSG00000147162.13	OGT	protein_coding	14168	0.120551	0.0443977	2.71525	0.00662249	0.0578019
ENSG00000186193.8	SAPCD2	protein_coding	4559.46	-0.15069	0.0554888	-2.71569	0.00661375	0.0578019
ENSG00000184058.13	TBX1	protein_coding	1456.13	-0.231987	0.085413	-2.71607	0.00660625	0.0578019
ENSG00000093144.18	ECHDC1	protein_coding	2174.22	0.192544	0.070941	2.71415	0.00664468	0.057928
ENSG00000127564.16	PKMYT1	protein_coding	1852.19	-0.201515	0.0742761	-2.71305	0.00666666	0.058052
ENSG00000179295.17	PTPN11	protein_coding	22627.3	0.100236	0.0369568	2.71224	0.00668304	0.0581269
ENSG00000135074.15	ADAM19	protein_coding	3262.98	-0.157894	0.058226	-2.71174	0.00669304	0.0581463
ENSG00000004766.15	VPS50	protein_coding	1336.82	0.241954	0.0892853	2.70989	0.00673047	0.0584036
ENSG00000119669.4	IRF2BPL	protein_coding	8505.87	-0.13008	0.0480095	-2.70947	0.00673908	0.0584106
ENSG00000114503.10	NCBP2	protein_coding	7653.84	0.114019	0.0420923	2.70878	0.00675316	0.0584648
ENSG00000169504.14	CLIC4	protein_coding	14694.4	0.105573	0.0389959	2.70729	0.00678345	0.0586592
ENSG00000001630.15	CYP51A1	protein_coding	6510.06	0.127749	0.047245	2.70397	0.00685159	0.058908
ENSG00000174243.9	DDX23	protein_coding	6273.17	-0.123399	0.0456357	-2.70401	0.00685078	0.058908
ENSG00000127948.15	POR	protein_coding	7514.99	-0.119328	0.0441166	-2.70483	0.00683396	0.058908
ENSG00000145860.11	RNF145	protein_coding	3441.34	0.152084	0.0562395	2.70422	0.00684654	0.058908
ENSG00000143373.17	ZNF687	protein_coding	1776.48	-0.201338	0.07444	-2.7047	0.00683657	0.058908
ENSG00000108654.14	DDX5	protein_coding	38493.3	0.0866743	0.0320678	2.70284	0.0068749	0.0590405
ENSG00000166750.9	SLFN5	protein_coding	2453.88	0.177323	0.0656186	2.70233	0.00688555	0.0590641
ENSG00000198925.11	ATG9A	protein_coding	6325.34	-0.121496	0.0450027	-2.69975	0.0069392	0.0592879
ENSG00000113712.17	CSNK1A1	protein_coding	26927.5	0.0838477	0.0310599	2.69955	0.00694335	0.0592879
ENSG00000125691.12	RPL23	protein_coding	13870.6	0.0998922	0.0370022	2.69963	0.00694173	0.0592879
ENSG00000137492.7	THAP12	protein_coding	8361.4	0.111234	0.0412017	2.69974	0.00693941	0.0592879
ENSG00000172780.16	RAB43	protein_coding	1748.51	-0.224503	0.0831936	-2.69856	0.00696407	0.0593971
ENSG00000116001.15	TIA1	protein_coding	5159.84	0.132447	0.0490942	2.69782	0.00697954	0.0594612
ENSG00000120438.11	TCP1	protein_coding	16475.3	0.0929049	0.0344606	2.69597	0.0070183	0.0597183
ENSG00000225614.2	ZNF469	protein_coding	1911.71	-0.203728	0.0755774	-2.69562	0.00702568	0.0597183
ENSG00000182899.15	RPL35A	protein_coding	14807.6	0.0955556	0.0354547	2.69514	0.00703586	0.0597369
ENSG00000165389.6	SPTSSA	protein_coding	3550.82	0.152354	0.0565779	2.69282	0.00708503	0.0600862
ENSG00000117054.13	ACADM	protein_coding	2874.74	0.173394	0.0644795	2.68913	0.00716375	0.0605631
ENSG00000155034.18	FBXL18	protein_coding	1476.5	-0.225431	0.0838262	-2.68927	0.00716084	0.0605631
ENSG00000166925.8	TSC22D4	protein_coding	3110.08	-0.168988	0.0628429	-2.68905	0.00716556	0.0605631
ENSG00000130589.16	HELZ2	protein_coding	2277.84	-0.197946	0.0737052	-2.68564	0.00723916	0.0611161
ENSG00000165119.20	HNRNPK	protein_coding	28595.8	0.0839007	0.0312508	2.68475	0.00725833	0.0611256
ENSG00000004779.9	NDUFAB1	protein_coding	3187.82	0.156003	0.0581027	2.68495	0.00725413	0.0611256
ENSG00000214022.11	REPIN1	protein_coding	8936.77	-0.122745	0.0457245	-2.68446	0.0072648	0.0611256
ENSG00000197555.9	SIPA1L1	protein_coding	13300	-0.0996777	0.037154	-2.68283	0.00730022	0.0613547
ENSG00000177189.13	RPS6KA3	protein_coding	18723.3	0.103233	0.0385021	2.68124	0.00733509	0.0613719
ENSG00000129925.10	TMEM8A	protein_coding	3164.08	-0.176609	0.0658492	-2.68202	0.00731794	0.0613719
ENSG00000146072.6	TNFRSF21	protein_coding	11491.4	-0.103539	0.0386108	-2.6816	0.00732702	0.0613719
ENSG00000104343.19	UBE2W	protein_coding	2762.8	0.165812	0.0618307	2.68171	0.00732467	0.0613719
ENSG00000078808.16	SDF4	protein_coding	22196.7	-0.0956377	0.0356773	-2.68063	0.00734831	0.0614138
ENSG00000049130.15	KITLG	protein_coding	1502.23	0.21645	0.0807647	2.68	0.00736214	0.0614607
ENSG00000099381.17	SETD1A	protein_coding	2316.26	-0.181916	0.0679201	-2.67839	0.00739777	0.0616893
ENSG00000173402.11	DAG1	protein_coding	7585.73	-0.117481	0.0438774	-2.67748	0.00741788	0.0617881
ENSG00000167797.7	CDK2AP2	protein_coding	2609.11	-0.179416	0.0670215	-2.677	0.00742845	0.0618074
ENSG00000173821.19	RNF213	protein_coding	14337.3	-0.116514	0.0435527	-2.67523	0.00746773	0.0620651
ENSG00000163320.10	CGGBP1	protein_coding	4852.79	0.14006	0.0523761	2.67412	0.00749249	0.0622018
ENSG00000115568.15	ZNF142	protein_coding	1816	-0.198059	0.0742372	-2.66792	0.00763216	0.063291
ENSG00000125912.10	NCLN	protein_coding	8195.27	-0.126755	0.0475402	-2.66627	0.0076699	0.0635336
ENSG00000147669.10	POLR2K	protein_coding	3361.45	0.152317	0.0571797	2.66384	0.00772552	0.0639235
ENSG00000143977.13	SNRPG	protein_coding	2970.49	0.160014	0.060101	2.66242	0.00775817	0.0641228
ENSG00000184281.14	TSSC4	protein_coding	1770.72	-0.208297	0.0782825	-2.66084	0.0077946	0.0643528
ENSG00000103326.11	CAPN15	protein_coding	2543.79	-0.177709	0.0668058	-2.66009	0.00781196	0.064425
ENSG00000117523.16	PRRC2C	protein_coding	32358.9	-0.106732	0.0401488	-2.65841	0.00785094	0.064604
ENSG00000183421.11	RIPK4	protein_coding	2876.17	-0.168827	0.0634995	-2.65871	0.00784403	0.064604
ENSG00000065882.15	TBC1D1	protein_coding	1653.25	-0.215176	0.0809832	-2.65705	0.00788288	0.0647955
ENSG00000243927.5	MRPS6	protein_coding	9466.41	0.106004	0.0399302	2.65472	0.00793735	0.0651717
ENSG00000072786.12	STK10	protein_coding	3520.14	-0.147835	0.0557026	-2.654	0.00795438	0.0652399
ENSG00000124155.17	PIGT	protein_coding	9651.18	-0.107175	0.0403885	-2.65361	0.00796361	0.065244
ENSG00000102858.12	MGRN1	protein_coding	3157.58	-0.154757	0.0583402	-2.65266	0.00798606	0.0653564
ENSG00000149313.10	AASDHPPT	protein_coding	4633.06	0.13502	0.050911	2.65208	0.00799979	0.0653972
ENSG00000125970.11	RALY	protein_coding	11224.3	-0.108178	0.0408489	-2.64826	0.00809077	0.0659967
ENSG00000172046.18	USP19	protein_coding	5098.02	-0.129894	0.0490486	-2.64826	0.00809064	0.0659967
ENSG00000184216.13	IRAK1	protein_coding	29880.7	-0.0855193	0.032348	-2.64373	0.00819985	0.0666683
ENSG00000239306.4	RBM14	protein_coding	3995.06	-0.148527	0.0561762	-2.64395	0.00819449	0.0666683
ENSG00000182087.13	TMEM259	protein_coding	7034.79	-0.122761	0.0464303	-2.64398	0.00819364	0.0666683
ENSG00000197894.10	ADH5	protein_coding	5169.7	0.13309	0.0503981	2.64078	0.00827163	0.0671789
ENSG00000053371.12	AKR7A2	protein_coding	2083.42	-0.188257	0.0713656	-2.63792	0.0083416	0.0676004
ENSG00000101782.14	RIOK3	protein_coding	5022.62	0.136318	0.0516698	2.63825	0.0083334	0.0676004
ENSG00000166250.11	CLMP	protein_coding	4524.82	-0.134818	0.051144	-2.63605	0.00838779	0.0678277
ENSG00000114650.18	SCAP	protein_coding	5313.1	-0.133248	0.0505445	-2.63626	0.00838263	0.0678277
ENSG00000196776.15	CD47	protein_coding	5660.99	0.130022	0.0493578	2.63428	0.00843157	0.0681082
ENSG00000108819.10	PPP1R9B	protein_coding	10195.5	-0.114088	0.0433172	-2.63378	0.00844412	0.068136
ENSG00000167880.7	EVPL	protein_coding	3699.67	-0.147501	0.0560178	-2.63311	0.00846065	0.0681942
ENSG00000176853.15	FAM91A1	protein_coding	7884.87	0.113491	0.0431072	2.63275	0.00846958	0.0681942
ENSG00000146731.10	CCT6A	protein_coding	30592.8	0.0888623	0.0337823	2.63044	0.00852747	0.0683718
ENSG00000213341.10	CHUK	protein_coding	2724.79	0.172052	0.0654022	2.63068	0.00852149	0.0683718
ENSG00000186687.15	LYRM7	protein_coding	2731.87	0.167482	0.0636691	2.63051	0.00852563	0.0683718
ENSG00000140563.14	MCTP2	protein_coding	4258.37	0.145782	0.0554217	2.63041	0.0085282	0.0683718
ENSG00000261236.7	BOP1	protein_coding	10985.1	-0.122903	0.0467679	-2.62794	0.0085904	0.0687968
ENSG00000172037.13	LAMB2	protein_coding	5105.86	-0.152195	0.0579639	-2.62569	0.00864733	0.0691048
ENSG00000123094.15	RASSF8	protein_coding	9804.17	0.109237	0.0415985	2.626	0.00863953	0.0691048
ENSG00000180304.14	OAZ2	protein_coding	4960.51	0.134103	0.0511326	2.62264	0.00872509	0.0696517
ENSG00000013810.18	TACC3	protein_coding	5184.32	-0.126559	0.0482765	-2.62154	0.00875325	0.069802
ENSG00000211455.7	STK38L	protein_coding	2503.62	0.175091	0.066809	2.62077	0.00877315	0.0698862
ENSG00000168077.13	SCARA3	protein_coding	2080.68	-0.183772	0.0701496	-2.61972	0.00880028	0.0700277
ENSG00000198542.13	ITGBL1	protein_coding	3760.06	0.145411	0.055579	2.6163	0.00888895	0.0706581
ENSG00000144827.8	ABHD10	protein_coding	3476.44	0.147909	0.0565542	2.61535	0.00891356	0.0707035
ENSG00000133065.10	SLC41A1	protein_coding	3254.56	-0.153925	0.0588518	-2.61547	0.0089106	0.0707035
ENSG00000175745.12	NR2F1	protein_coding	18885.5	-0.108189	0.0413764	-2.61475	0.0089293	0.0707534
ENSG00000153879.8	CEBPG	protein_coding	3197.05	0.152639	0.0583973	2.6138	0.00895407	0.070829
ENSG00000101412.12	E2F1	protein_coding	3487.59	-0.149732	0.0573059	-2.61286	0.00897884	0.070829
ENSG00000111206.12	FOXM1	protein_coding	8365.36	-0.112466	0.0430533	-2.61224	0.00899502	0.070829
ENSG00000204388.6	HSPA1B	protein_coding	10227.1	-0.120861	0.0462675	-2.61222	0.00899566	0.070829
ENSG00000115648.13	MLPH	protein_coding	4923.04	-0.130963	0.0501182	-2.61309	0.00897266	0.070829
ENSG00000085365.17	SCAMP1	protein_coding	4013.93	0.142769	0.0546247	2.61363	0.00895849	0.070829
ENSG00000164096.12	C4orf3	protein_coding	2337.77	0.17269	0.0663153	2.60408	0.0092121	0.0722291
ENSG00000171621.13	SPSB1	protein_coding	1282.25	-0.225845	0.0867271	-2.60409	0.00921191	0.0722291
ENSG00000221983.7	UBA52	protein_coding	17107.2	-0.0935378	0.0359118	-2.60465	0.00919679	0.0722291
ENSG00000011451.18	WIZ	protein_coding	5223.07	-0.124576	0.0478385	-2.60409	0.00921189	0.0722291
ENSG00000166833.19	NAV2	protein_coding	2278.4	-0.178052	0.0683935	-2.60335	0.0092318	0.0723077
ENSG00000136982.5	DSCC1	protein_coding	2573.49	0.167869	0.0645172	2.60192	0.00927033	0.0724188
ENSG00000244754.8	N4BP2L2	protein_coding	2062.28	0.181047	0.0695868	2.60175	0.00927503	0.0724188
ENSG00000160957.12	RECQL4	protein_coding	6283.51	-0.13589	0.052218	-2.60235	0.00925866	0.0724188
ENSG00000123146.19	ADGRE5	protein_coding	13960.9	-0.0959182	0.036873	-2.60131	0.00928674	0.0724346
ENSG00000168092.13	PAFAH1B2	protein_coding	8021.96	0.11203	0.0430889	2.59997	0.00932312	0.0726427
ENSG00000125755.18	SYMPK	protein_coding	2819.31	-0.165133	0.0635385	-2.59895	0.00935104	0.0727844
ENSG00000113441.15	LNPEP	protein_coding	3944.67	0.144779	0.0557197	2.59835	0.00936733	0.0728354
ENSG00000102302.7	FGD1	protein_coding	1981.53	-0.18353	0.0707222	-2.59508	0.00945688	0.0733791
ENSG00000047315.15	POLR2B	protein_coding	18383	0.103242	0.0397817	2.59521	0.00945322	0.0733791
ENSG00000166166.12	TRMT61A	protein_coding	2669.67	-0.168528	0.064981	-2.5935	0.00950057	0.0736417
ENSG00000182718.16	ANXA2	protein_coding	69179.2	-0.0815318	0.0314445	-2.59288	0.00951754	0.0736969
ENSG00000100979.14	PLTP	protein_coding	5916.41	-0.118642	0.045786	-2.59123	0.00956333	0.0739749
ENSG00000172922.9	RNASEH2C	protein_coding	2768.13	-0.170411	0.0658	-2.58984	0.0096021	0.0741981
ENSG00000104442.9	ARMC1	protein_coding	4754.84	0.130556	0.0504322	2.58874	0.0096329	0.0742826
ENSG00000063241.7	ISOC2	protein_coding	4164.66	-0.150438	0.0581103	-2.58883	0.00963029	0.0742826
ENSG00000169221.13	TBC1D10B	protein_coding	3021.31	-0.162903	0.062937	-2.58835	0.00964372	0.0742894
ENSG00000134779.14	TPGS2	protein_coding	3087.27	-0.156737	0.0605818	-2.5872	0.00967595	0.0744344
ENSG00000136295.14	TTYH3	protein_coding	11034.6	-0.103882	0.040156	-2.58697	0.00968244	0.0744344
ENSG00000143774.16	GUK1	protein_coding	10062.2	-0.119535	0.0462353	-2.58537	0.00972759	0.0746281
ENSG00000143742.12	SRP9	protein_coding	12463.5	0.10116	0.0391267	2.58545	0.00972516	0.0746281
ENSG00000183258.11	DDX41	protein_coding	5662.16	-0.121391	0.0469675	-2.58458	0.00974968	0.0746444
ENSG00000160972.9	PPP1R16A	protein_coding	4492.46	-0.147956	0.0572393	-2.58487	0.00974163	0.0746444
ENSG00000122643.19	NT5C3A	protein_coding	2008.67	0.186692	0.0722818	2.58283	0.00979928	0.0749474
ENSG00000080371.5	RAB21	protein_coding	3679.19	0.142208	0.0550816	2.58177	0.0098296	0.0751025
ENSG00000068438.14	FTSJ1	protein_coding	3979.29	-0.138527	0.0536736	-2.58091	0.00985411	0.075213
ENSG00000130723.19	PRRC2B	protein_coding	9526.29	-0.107948	0.0418363	-2.58025	0.00987299	0.0752803
ENSG00000179820.15	MYADM	protein_coding	14759.4	-0.0936221	0.0362955	-2.57944	0.00989607	0.0753795
ENSG00000101266.18	CSNK2A1	protein_coding	18694.5	0.0876924	0.0340062	2.57872	0.00991685	0.0753874
ENSG00000041357.15	PSMA4	protein_coding	6682.86	0.133931	0.0519375	2.5787	0.00991728	0.0753874
ENSG00000163513.17	TGFBR2	protein_coding	9378.85	0.104415	0.0404994	2.5782	0.00993178	0.075421
ENSG00000164649.19	CDCA7L	protein_coding	3824.12	0.143123	0.0555546	2.57627	0.00998736	0.0757662
ENSG00000142676.13	RPL11	protein_coding	21079	0.0926281	0.0359798	2.57444	0.0100401	0.0760892
ENSG00000132640.14	BTBD3	protein_coding	5271.48	0.124259	0.0482844	2.57347	0.0100684	0.0762267
ENSG00000142552.7	RCN3	protein_coding	4002.93	-0.158396	0.0615807	-2.57217	0.0101062	0.0764354
ENSG00000090372.14	STRN4	protein_coding	5285.04	-0.127615	0.0496866	-2.56839	0.0102171	0.0771961
ENSG00000100258.17	LMF2	protein_coding	3502.83	-0.158612	0.0617766	-2.5675	0.0102434	0.0773163
ENSG00000188976.10	NOC2L	protein_coding	14302.8	-0.0998635	0.0389007	-2.56714	0.0102541	0.0773193
ENSG00000117335.19	CD46	protein_coding	7020.62	0.124569	0.0485345	2.5666	0.0102701	0.0773615
ENSG00000144959.9	NCEH1	protein_coding	3735.6	-0.141716	0.0552794	-2.56364	0.0103581	0.077946
ENSG00000185480.11	C12orf48	protein_coding	1934.02	0.186369	0.0727158	2.56298	0.0103777	0.0780152
ENSG00000170903.10	MSANTD4	protein_coding	2221.91	0.181968	0.0710412	2.56144	0.010424	0.078206
ENSG00000257621.7	RP11-349A22.5	antisense	2112.87	0.177031	0.0691053	2.56175	0.0104145	0.078206
ENSG00000128510.10	CPA4	protein_coding	1721.21	-0.197603	0.0772104	-2.55928	0.010489	0.078296
ENSG00000177706.8	FAM20C	protein_coding	2806.63	-0.167455	0.0654386	-2.55897	0.0104983	0.078296
ENSG00000115233.11	PSMD14	protein_coding	6615.7	0.13247	0.0517564	2.55949	0.0104825	0.078296
ENSG00000129353.14	SLC44A2	protein_coding	6242.97	-0.118613	0.0463265	-2.56038	0.0104558	0.078296
ENSG00000172340.14	SUCLG2	protein_coding	3459.93	0.150729	0.0589026	2.55895	0.0104988	0.078296
ENSG00000188807.12	TMEM201	protein_coding	1623.57	-0.202534	0.0791225	-2.55975	0.0104747	0.078296
ENSG00000107338.9	SHB	protein_coding	2700.62	-0.17326	0.0677243	-2.55832	0.010518	0.0783534
ENSG00000173465.7	SSSCA1	protein_coding	1546.53	-0.223027	0.0871878	-2.55801	0.0105274	0.0783534
ENSG00000123159.15	GIPC1	protein_coding	9581.52	-0.132144	0.0516667	-2.55762	0.010539	0.0783614
ENSG00000167173.18	C15orf39	protein_coding	2514.2	-0.171863	0.0672389	-2.556	0.0105882	0.0784616
ENSG00000107175.11	CREB3	protein_coding	1269.2	-0.2288	0.0894986	-2.55646	0.0105743	0.0784616
ENSG00000146648.17	EGFR	protein_coding	21199.6	-0.0990712	0.0387614	-2.55593	0.0105906	0.0784616
ENSG00000160218.12	TRAPPC10	protein_coding	3681.71	-0.140828	0.0551014	-2.5558	0.0105944	0.0784616
ENSG00000105401.8	CDC37	protein_coding	21693.5	-0.0960724	0.0375968	-2.55534	0.0106085	0.0784879
ENSG00000163235.15	TGFA	protein_coding	1948.55	-0.182256	0.0713959	-2.55276	0.0106874	0.0789938
ENSG00000169446.5	MMGT1	protein_coding	3435.06	0.1487	0.0582773	2.5516	0.0107231	0.0791792
ENSG00000119333.11	WDR34	protein_coding	2818.27	-0.162512	0.0637144	-2.55063	0.0107527	0.0793198
ENSG00000125656.9	CLPP	protein_coding	4903.9	-0.138988	0.0545011	-2.55019	0.0107665	0.0793434
ENSG00000160075.11	SSU72	protein_coding	12965.9	-0.0995103	0.039027	-2.54978	0.010779	0.0793571
ENSG00000167468.16	GPX4	protein_coding	7794.16	-0.129527	0.0508152	-2.54897	0.010804	0.0794632
ENSG00000155850.7	SLC26A2	protein_coding	4212.18	0.13828	0.054265	2.54824	0.0108268	0.0795525
ENSG00000104522.15	TSTA3	protein_coding	8195.23	-0.114708	0.0450353	-2.54707	0.0108631	0.0797412
ENSG00000130204.12	TOMM40	protein_coding	8163.16	-0.119015	0.0467336	-2.54667	0.0108755	0.0797535
ENSG00000139291.13	TMEM19	protein_coding	1820.61	0.194983	0.0766251	2.54463	0.0109394	0.0801434
ENSG00000115306.15	SPTBN1	protein_coding	27406	-0.0852071	0.0335014	-2.54339	0.0109784	0.0803505
ENSG00000097021.19	ACOT7	protein_coding	8179.86	-0.124222	0.0488556	-2.54263	0.0110021	0.0804453
ENSG00000035687.9	ADSS	protein_coding	4610.33	0.12702	0.0500998	2.53533	0.011234	0.0811842
ENSG00000105676.13	ARMC6	protein_coding	3303.09	-0.149013	0.0587607	-2.53593	0.011215	0.0811842
ENSG00000117411.16	B4GALT2	protein_coding	4419.04	-0.131302	0.0517337	-2.53804	0.0111474	0.0811842
ENSG00000145907.14	G3BP1	protein_coding	14139	0.0976549	0.0384997	2.53651	0.0111963	0.0811842
ENSG00000133704.9	IPO8	protein_coding	3134.9	0.149858	0.0590474	2.53792	0.0111512	0.0811842
ENSG00000173621.8	LRFN4	protein_coding	3871.65	-0.163294	0.0643267	-2.53851	0.0111326	0.0811842
ENSG00000116688.16	MFN2	protein_coding	14952.3	-0.0888305	0.0350058	-2.53759	0.0111617	0.0811842
ENSG00000020129.15	NCDN	protein_coding	1959.68	-0.188766	0.0744388	-2.53585	0.0112174	0.0811842
ENSG00000168291.12	PDHB	protein_coding	4506.39	0.134087	0.0528926	2.53509	0.0112419	0.0811842
ENSG00000107959.15	PITRM1	protein_coding	9543.82	-0.0994596	0.0392343	-2.53502	0.0112442	0.0811842
ENSG00000146950.12	SHROOM2	protein_coding	2147.17	-0.173131	0.0682932	-2.53511	0.0112413	0.0811842
ENSG00000153214.9	TMEM87B	protein_coding	3388.54	0.149635	0.0589744	2.53729	0.0111715	0.0811842
ENSG00000038382.19	TRIO	protein_coding	9076.07	-0.111583	0.0439987	-2.53605	0.011211	0.0811842
ENSG00000113161.15	HMGCR	protein_coding	2369.82	0.169389	0.0668382	2.53431	0.0112669	0.0811914
ENSG00000073417.14	PDE8A	protein_coding	3749.55	0.143634	0.0566715	2.53451	0.0112606	0.0811914
ENSG00000108406.9	DHX40	protein_coding	5219.99	0.121268	0.0478627	2.53365	0.011288	0.081265
ENSG00000140941.12	MAP1LC3B	protein_coding	4585.53	0.143868	0.0567974	2.53301	0.0113088	0.0813363
ENSG00000138032.20	PPM1B	protein_coding	1971.38	0.179597	0.0709302	2.53203	0.0113404	0.0814853
ENSG00000143368.9	SF3B4	protein_coding	3594.62	-0.140728	0.0556146	-2.53042	0.0113926	0.0817106
ENSG00000167088.10	SNRPD1	protein_coding	3761.74	0.143475	0.0567009	2.53039	0.0113936	0.0817106
ENSG00000109066.13	TMEM104	protein_coding	3279.2	-0.145534	0.0575268	-2.52985	0.0114111	0.0817577
ENSG00000089351.14	GRAMD1A	protein_coding	2273.29	-0.170517	0.0674719	-2.52723	0.0114967	0.0822923
ENSG00000085872.14	CHERP	protein_coding	5511.57	-0.119532	0.047308	-2.52668	0.0115146	0.0823415
ENSG00000158417.10	EIF5B	protein_coding	15583.7	0.0881686	0.034918	2.52502	0.0115691	0.0825959
ENSG00000026025.15	VIM	protein_coding	53571.9	-0.0761916	0.0301758	-2.52493	0.0115723	0.0825959
ENSG00000175582.19	RAB6A	protein_coding	8959.58	0.102475	0.0405928	2.52447	0.0115873	0.0826246
ENSG00000166710.17	B2M	protein_coding	21492.9	0.084712	0.0335618	2.52406	0.0116009	0.0826423
ENSG00000103266.10	STUB1	protein_coding	5076.28	-0.155852	0.0617723	-2.523	0.0116357	0.0828119
ENSG00000105355.8	PLIN3	protein_coding	6255.72	-0.120308	0.0476919	-2.52262	0.0116486	0.0828243
ENSG00000072071.16	ADGRL1	protein_coding	4554.38	-0.132803	0.052681	-2.5209	0.0117057	0.0830724
ENSG00000197136.4	PCNX3	protein_coding	4304.68	-0.132007	0.0523648	-2.5209	0.0117054	0.0830724
ENSG00000187608.8	ISG15	protein_coding	3115.47	-0.1637	0.0649734	-2.5195	0.0117521	0.0833231
ENSG00000034713.7	GABARAPL2	protein_coding	1627.3	0.198969	0.0789938	2.51879	0.0117758	0.0833332
ENSG00000123728.9	RAP2C	protein_coding	3547.01	0.141453	0.0561564	2.51891	0.0117717	0.0833332
ENSG00000133112.16	TPT1	protein_coding	59696.7	0.0772528	0.0306754	2.51839	0.0117892	0.0833491
ENSG00000176597.11	B3GNT5	protein_coding	5676.81	0.120547	0.0478781	2.51779	0.0118094	0.0834131
ENSG00000104231.10	ZFAND1	protein_coding	2553.15	0.172252	0.0684321	2.51713	0.0118317	0.0834913
ENSG00000072195.14	SPEG	protein_coding	1234.11	-0.220498	0.0876246	-2.5164	0.0118562	0.0835854
ENSG00000085788.13	DDHD2	protein_coding	3496.27	0.147183	0.058512	2.51544	0.0118884	0.0836634
ENSG00000155100.10	OTUD6B	protein_coding	3102.18	0.148446	0.0590147	2.5154	0.0118896	0.0836634
ENSG00000158195.10	WASF2	protein_coding	9004.28	-0.102422	0.040751	-2.51336	0.0119586	0.08407
ENSG00000123975.4	CKS2	protein_coding	2431.25	0.164801	0.06561	2.51183	0.0120107	0.0843566
ENSG00000183048.11	SLC25A10	protein_coding	2360.68	-0.177578	0.0707502	-2.50993	0.0120755	0.0846532
ENSG00000109046.14	WSB1	protein_coding	2395.2	0.170168	0.0677973	2.50995	0.0120749	0.0846532
ENSG00000131263.12	RLIM	protein_coding	5642.83	0.121803	0.0485709	2.50773	0.0121509	0.0850892
ENSG00000151715.7	TMEM45B	protein_coding	1493.89	0.203927	0.0813283	2.50745	0.0121605	0.0850892
ENSG00000167005.13	NUDT21	protein_coding	7236.54	0.112561	0.0448998	2.50694	0.0121782	0.0851333
ENSG00000099995.18	SF3A1	protein_coding	7083.86	-0.122199	0.0487637	-2.50593	0.0122129	0.0852966
ENSG00000164930.11	FZD6	protein_coding	3924.41	0.133799	0.0534013	2.50553	0.0122267	0.0853129
ENSG00000135047.14	CTSL	protein_coding	2891.63	0.163579	0.0653012	2.50499	0.0122454	0.0853643
ENSG00000143815.14	LBR	protein_coding	2896.04	0.15812	0.0631478	2.50397	0.0122808	0.0853718
ENSG00000101367.8	MAPRE1	protein_coding	12711.2	0.0926597	0.0370033	2.50409	0.0122765	0.0853718
ENSG00000147586.9	MRPS28	protein_coding	1720.95	0.193782	0.0773798	2.5043	0.0122695	0.0853718
ENSG00000022267.16	FHL1	protein_coding	4324.16	-0.129467	0.0517445	-2.50204	0.0123478	0.0857584
ENSG00000076924.11	XAB2	protein_coding	5159.39	-0.123718	0.0494781	-2.50046	0.0124031	0.0860625
ENSG00000171552.12	BCL2L1	protein_coding	14421.6	-0.0878839	0.0351737	-2.49856	0.0124698	0.0862427
ENSG00000110321.16	EIF4G2	protein_coding	83310.7	-0.074218	0.0296953	-2.49932	0.0124433	0.0862427
ENSG00000115825.9	PRKD3	protein_coding	4895.35	0.131473	0.0526205	2.49852	0.0124714	0.0862427
ENSG00000196453.7	ZNF777	protein_coding	1933.72	-0.178628	0.0714967	-2.49841	0.0124752	0.0862427
ENSG00000160949.16	TONSL	protein_coding	4923.54	-0.141685	0.0567299	-2.49753	0.0125062	0.0863768
ENSG00000127022.14	CANX	protein_coding	50888.6	0.0765148	0.0306459	2.49674	0.012534	0.0864308
ENSG00000110057.7	UNC93B1	protein_coding	1996.61	-0.188226	0.0753912	-2.49666	0.0125371	0.0864308
ENSG00000166685.11	COG1	protein_coding	3345.5	-0.152104	0.0609405	-2.49594	0.0125626	0.0865267
ENSG00000099795.6	NDUFB7	protein_coding	4000.04	-0.160096	0.0641691	-2.49491	0.0125987	0.0866961
ENSG00000089009.15	RPL6	protein_coding	44474.6	0.0882035	0.0354087	2.49101	0.0127379	0.0874926
ENSG00000085721.12	RRN3	protein_coding	4000.56	0.134519	0.0539969	2.49122	0.0127304	0.0874926
ENSG00000153395.9	LPCAT1	protein_coding	8410.16	-0.10628	0.042715	-2.48813	0.0128417	0.0881244
ENSG00000165997.4	ARL5B	protein_coding	2502.57	0.160887	0.0647125	2.48619	0.012912	0.0884961
ENSG00000065526.10	SPEN	protein_coding	6975.21	-0.124419	0.0500482	-2.48598	0.0129195	0.0884961
ENSG00000127527.13	EPS15L1	protein_coding	3225.32	-0.145247	0.058451	-2.48494	0.0129572	0.088673
ENSG00000146112.11	PPP1R18	protein_coding	5810.67	-0.118764	0.0478006	-2.48457	0.0129707	0.0886847
ENSG00000113328.18	CCNG1	protein_coding	5742.88	0.128466	0.0517223	2.48376	0.0130003	0.088792
ENSG00000179632.9	MAF1	protein_coding	10509.8	-0.121963	0.0491109	-2.48342	0.0130129	0.088792
ENSG00000112697.15	TMEM30A	protein_coding	5809.33	0.115598	0.0465528	2.48317	0.013022	0.088792
ENSG00000237550.5	RPL9P9	transcribed_processed_pseudogene	6650.52	0.110329	0.0444402	2.48263	0.0130417	0.0888452
ENSG00000072210.18	ALDH3A2	protein_coding	17142.1	0.0906829	0.036534	2.48215	0.0130593	0.0888837
ENSG00000170515.13	PA2G4	protein_coding	15577.6	-0.0856101	0.0345228	-2.47981	0.0131452	0.089387
ENSG00000110917.7	MLEC	protein_coding	28263.6	0.0792316	0.0319761	2.47784	0.0132181	0.0898016
ENSG00000115484.14	CCT4	protein_coding	13529.4	0.0891851	0.0359983	2.47748	0.0132314	0.08981
ENSG00000143870.12	PDIA6	protein_coding	33941	0.0773148	0.0312117	2.47711	0.0132452	0.0898221
ENSG00000105568.17	PPP2R1A	protein_coding	20064.4	-0.0817384	0.0330021	-2.47676	0.0132581	0.0898281
ENSG00000171314.8	PGAM1	protein_coding	54898.5	0.0713935	0.0288773	2.4723	0.0134246	0.0907102
ENSG00000089063.14	TMEM230	protein_coding	7437.29	0.10489	0.0424212	2.47259	0.0134139	0.0907102
ENSG00000198146.4	ZNF770	protein_coding	5574.42	0.121229	0.0490249	2.47281	0.0134056	0.0907102
ENSG00000105968.18	H2AFV	protein_coding	9016.43	0.104269	0.0422039	2.47061	0.0134884	0.0910586
ENSG00000137692.11	DCUN1D5	protein_coding	4425.02	0.125696	0.0509213	2.46843	0.0135708	0.09145
ENSG00000131653.12	TRAF7	protein_coding	5409.04	-0.117416	0.0475648	-2.46855	0.0135661	0.09145
ENSG00000086758.15	HUWE1	protein_coding	28664.4	-0.103973	0.0421436	-2.46712	0.0136204	0.0917019
ENSG00000185222.9	TCEAL9	protein_coding	2033.01	0.174057	0.0705755	2.46625	0.0136537	0.091843
ENSG00000153132.12	CLGN	protein_coding	2184.23	0.192829	0.0782458	2.4644	0.0137244	0.0922356
ENSG00000106290.14	TAF6	protein_coding	4501.4	-0.127665	0.0518235	-2.46346	0.0137603	0.0923939
ENSG00000141959.16	PFKL	protein_coding	12509	-0.108489	0.0440547	-2.4626	0.0137932	0.0924544
ENSG00000233927.4	RPS28	protein_coding	17525.6	-0.0937029	0.0380506	-2.46258	0.013794	0.0924544
ENSG00000153936.16	HS2ST1	protein_coding	4490.27	0.124564	0.0506279	2.46038	0.0138788	0.0929398
ENSG00000196411.9	EPHB4	protein_coding	9149.73	-0.10438	0.0424376	-2.4596	0.0139092	0.0930595
ENSG00000198707.14	CEP290	protein_coding	1670.26	0.19206	0.0781278	2.45828	0.0139604	0.0931674
ENSG00000166128.12	RAB8B	protein_coding	2071.14	0.178554	0.0726353	2.45822	0.0139627	0.0931674
ENSG00000180964.16	TCEAL8	protein_coding	1413.81	0.209871	0.0853724	2.4583	0.0139597	0.0931674
ENSG00000134255.13	CEPT1	protein_coding	1420.56	0.205341	0.0836055	2.45607	0.0140466	0.0934944
ENSG00000189159.15	HN1	protein_coding	9860.17	-0.0958782	0.0390402	-2.45588	0.0140539	0.0934944
ENSG00000168288.12	MMADHC	protein_coding	4788.36	0.125272	0.0510131	2.45568	0.0140617	0.0934944
ENSG00000198276.15	UCKL1	protein_coding	2306.2	-0.165277	0.0672826	-2.45646	0.0140314	0.0934944
ENSG00000169908.11	TM4SF1	protein_coding	8236.7	0.105458	0.0429544	2.4551	0.0140844	0.0935625
ENSG00000116489.12	CAPZA1	protein_coding	15999.4	0.101937	0.0415363	2.45417	0.0141211	0.0936962
ENSG00000132300.18	PTCD3	protein_coding	5474.77	0.121666	0.0495797	2.45395	0.0141296	0.0936962
ENSG00000160685.13	ZBTB7B	protein_coding	1347.66	-0.208563	0.0850112	-2.45336	0.0141528	0.0937667
ENSG00000124767.6	GLO1	protein_coding	32032.9	0.0757352	0.0308819	2.45241	0.0141902	0.0938488
ENSG00000111615.13	KRR1	protein_coding	4108.5	0.142644	0.0581577	2.4527	0.0141787	0.0938488
ENSG00000101752.11	MIB1	protein_coding	8122.1	0.11501	0.0469116	2.45164	0.0142207	0.0939672
ENSG00000174886.12	NDUFA11	protein_coding	5416.36	-0.149046	0.0608365	-2.44995	0.0142876	0.0942424
ENSG00000135249.7	RINT1	protein_coding	4305.79	0.130611	0.0533105	2.45001	0.0142853	0.0942424
ENSG00000133275.15	CSNK1G2	protein_coding	4951.41	-0.134158	0.0548224	-2.44713	0.0143998	0.0948989
ENSG00000198015.12	MRPL42	protein_coding	3349.32	0.148456	0.0606856	2.44631	0.0144327	0.0950321
ENSG00000156860.15	FBRS	protein_coding	3606.55	-0.134562	0.0550605	-2.4439	0.0145295	0.0954811
ENSG00000132613.14	MTSS1L	protein_coding	2912.97	-0.148824	0.0609073	-2.44345	0.0145476	0.0954811
ENSG00000148400.10	NOTCH1	protein_coding	2078.97	-0.177324	0.0725583	-2.44389	0.0145299	0.0954811
ENSG00000134419.15	RPS15A	protein_coding	11963.8	0.100665	0.0411999	2.44334	0.0145519	0.0954811
ENSG00000017260.19	ATP2C1	protein_coding	6786.98	0.110057	0.0450632	2.44227	0.0145951	0.0955966
ENSG00000064726.9	BTBD1	protein_coding	8073.97	0.10371	0.0424639	2.44231	0.0145938	0.0955966
ENSG00000171222.10	SCAND1	protein_coding	1414.15	-0.208752	0.085487	-2.44191	0.0146097	0.0956082
ENSG00000111711.9	GOLT1B	protein_coding	2115.73	0.177246	0.0726074	2.44115	0.0146405	0.0956713
ENSG00000157227.12	MMP14	protein_coding	5993.5	-0.113475	0.0464863	-2.44104	0.0146449	0.0956713
ENSG00000140299.11	BNIP2	protein_coding	3421.91	0.140766	0.0576967	2.43976	0.0146972	0.0958133
ENSG00000182199.10	SHMT2	protein_coding	8595.99	-0.101173	0.0414718	-2.43956	0.014705	0.0958133
ENSG00000112096.17	SOD2	protein_coding	5175.71	0.125809	0.0515578	2.44016	0.0146808	0.0958133
ENSG00000198026.7	ZNF335	protein_coding	1782.03	-0.181652	0.0745002	-2.43828	0.0147575	0.0960715
ENSG00000174173.6	TRMT10C	protein_coding	2723.96	0.158734	0.0651184	2.43762	0.0147844	0.0961631
ENSG00000078369.17	GNB1	protein_coding	43952.3	-0.070982	0.0291274	-2.43694	0.014812	0.0962586
ENSG00000111144.9	LTA4H	protein_coding	4439.6	0.13265	0.0544534	2.43604	0.0148492	0.0964164
ENSG00000172270.19	BSG	protein_coding	25639.5	-0.0846652	0.0347955	-2.43322	0.0149651	0.0969165
ENSG00000130703.16	OSBPL2	protein_coding	7023.87	0.106666	0.0438281	2.43374	0.0149436	0.0969165
ENSG00000196367.13	TRRAP	protein_coding	11431.4	-0.103028	0.0423378	-2.43347	0.0149548	0.0969165
ENSG00000073792.15	IGF2BP2	protein_coding	11078.4	-0.0953364	0.0391976	-2.4322	0.0150075	0.0970426
ENSG00000134440.11	NARS	protein_coding	15525.9	0.10063	0.0413755	2.43213	0.0150105	0.0970426
ENSG00000153989.7	NUS1	protein_coding	6290.74	0.11015	0.0453057	2.43126	0.0150463	0.0971904
ENSG00000006831.9	ADIPOR2	protein_coding	4046.69	0.140339	0.0577479	2.43021	0.0150901	0.0973894
ENSG00000084090.13	STARD7	protein_coding	13227.2	0.09	0.0370413	2.42972	0.0151104	0.0974358
ENSG00000129084.17	PSMA1	protein_coding	7818.54	0.1044	0.0430211	2.42671	0.0152366	0.0981651
ENSG00000147679.11	UTP23	protein_coding	2615.9	0.161853	0.0667309	2.42546	0.0152889	0.0984171
ENSG00000068323.16	TFE3	protein_coding	4148.16	-0.126622	0.0522124	-2.42513	0.0153029	0.098423
ENSG00000189266.11	PNRC2	protein_coding	5937.35	0.115843	0.0477829	2.42435	0.0153357	0.0985493
ENSG00000103187.7	COTL1	protein_coding	25250.4	-0.0859458	0.0354614	-2.42364	0.0153658	0.0986574
ENSG00000221914.9	PPP2R2A	protein_coding	4339.62	0.129501	0.05345	2.42284	0.0153996	0.0987902
ENSG00000101294.16	HM13	protein_coding	10583.9	-0.0925805	0.0382295	-2.42171	0.0154478	0.0990144
ENSG00000143549.19	TPM3	protein_coding	30422.7	-0.0745982	0.0308109	-2.42117	0.0154708	0.0990769
ENSG00000175265.17	GOLGA8A	protein_coding	3097.28	0.152178	0.0628981	2.41944	0.0155444	0.0993779
ENSG00000166228.8	PCBD1	protein_coding	3567.83	-0.134586	0.0556223	-2.41964	0.0155359	0.0993779
ENSG00000137845.14	ADAM10	protein_coding	5836.15	0.116425	0.0481477	2.41808	0.0156027	0.0994236
ENSG00000058668.14	ATP2B4	protein_coding	2509.23	-0.156522	0.0647328	-2.41798	0.0156071	0.0994236
ENSG00000085719.12	CPNE3	protein_coding	16603.9	0.0908031	0.0375383	2.41895	0.0155655	0.0994236
ENSG00000174106.2	LEMD3	protein_coding	1558.87	0.190695	0.0788743	2.41771	0.0156187	0.0994236
ENSG00000255248.7	MIR100HG	processed_transcript	4488.85	0.140382	0.0580712	2.41741	0.0156313	0.0994236
ENSG00000076685.18	NT5C2	protein_coding	9764.72	0.0950052	0.0392852	2.41834	0.0155913	0.0994236
ENSG00000132522.15	GPS2	protein_coding	1606.5	-0.190048	0.0786932	-2.41506	0.0157328	0.0995616
ENSG00000100401.19	RANGAP1	protein_coding	9985.69	-0.100655	0.0416803	-2.41493	0.0157383	0.0995616
ENSG00000091490.10	SEL1L3	protein_coding	9434.88	-0.0971012	0.0402118	-2.41475	0.0157462	0.0995616
ENSG00000141985.9	SH3GL1	protein_coding	3884.12	-0.142399	0.058952	-2.41552	0.015713	0.0995616
ENSG00000114120.11	SLC25A36	protein_coding	3208.28	0.143152	0.0592741	2.41509	0.0157314	0.0995616
ENSG00000136868.10	SLC31A1	protein_coding	3231.78	0.139277	0.0576489	2.41595	0.0156943	0.0995616
ENSG00000197226.12	TBC1D9B	protein_coding	7862.09	-0.104654	0.0433299	-2.41529	0.0157228	0.0995616
ENSG00000213390.10	ARHGAP19	protein_coding	2385.22	0.163069	0.0675679	2.41341	0.0158038	0.0998357
ENSG00000109586.11	GALNT7	protein_coding	4133.39	0.139456	0.0577905	2.41313	0.0158162	0.0998357
ENSG00000082153.17	BZW1	protein_coding	28424.1	0.0821724	0.0341105	2.409	0.0159961	0.100886
ENSG00000138829.11	FBN2	protein_coding	17520.8	-0.0946748	0.0393173	-2.40797	0.0160416	0.101088
ENSG00000133895.14	MEN1	protein_coding	3764.22	-0.131268	0.0545499	-2.40637	0.0161118	0.101445
ENSG00000170584.10	NUDCD2	protein_coding	2814.59	0.157818	0.0656038	2.40562	0.0161452	0.10157
ENSG00000039319.16	ZFYVE16	protein_coding	2218.14	0.170083	0.0707554	2.40381	0.0162252	0.101987
ENSG00000184402.14	SS18L1	protein_coding	2722.7	0.151142	0.062896	2.40305	0.0162592	0.102115
ENSG00000170638.9	TRABD	protein_coding	2120.27	-0.179045	0.0745333	-2.40221	0.0162963	0.102262
ENSG00000159335.15	PTMS	protein_coding	7874.74	-0.104252	0.0434258	-2.40069	0.0163642	0.102602
ENSG00000154642.10	C21orf91	protein_coding	1489.42	0.201702	0.0841367	2.39731	0.016516	0.103122
ENSG00000126247.10	CAPNS1	protein_coding	10881.3	-0.0908454	0.0378789	-2.39831	0.0164707	0.103122
ENSG00000139726.10	DENR	protein_coding	9696.31	0.0947891	0.0395358	2.39755	0.0165052	0.103122
ENSG00000164104.11	HMGB2	protein_coding	5218.73	0.117153	0.0488529	2.39808	0.0164812	0.103122
ENSG00000149503.12	INCENP	protein_coding	5311.22	-0.124251	0.0518268	-2.39744	0.0165103	0.103122
ENSG00000196950.13	SLC39A10	protein_coding	1696.85	0.186346	0.0777442	2.39691	0.0165338	0.103147
ENSG00000136986.9	DERL1	protein_coding	8657.23	0.0982359	0.0410043	2.39575	0.0165864	0.103303
ENSG00000172336.4	POP7	protein_coding	2792.61	-0.15458	0.0645209	-2.39582	0.0165833	0.103303
ENSG00000173517.10	PEAK1	protein_coding	1447.57	-0.199166	0.0831791	-2.39442	0.0166467	0.103592
ENSG00000196262.13	PPIA	protein_coding	79253.4	0.0797582	0.0333264	2.39325	0.0167	0.103832
ENSG00000198816.6	ZNF358	protein_coding	4053.33	-0.135398	0.0565819	-2.39296	0.0167131	0.103832
ENSG00000027847.13	B4GALT7	protein_coding	2023.75	-0.168448	0.0704104	-2.39238	0.0167396	0.103911
ENSG00000225190.10	PLEKHM1	protein_coding	1958.18	-0.171112	0.0715543	-2.39135	0.0167864	0.103943
ENSG00000198218.10	QRICH1	protein_coding	4603.4	-0.122298	0.0511377	-2.39155	0.0167773	0.103943
ENSG00000167461.11	RAB8A	protein_coding	6696.74	-0.105005	0.0439068	-2.39155	0.0167774	0.103943
ENSG00000119242.8	CCDC92	protein_coding	2206.6	-0.163615	0.0684752	-2.38941	0.0168754	0.104407
ENSG00000162337.11	LRP5	protein_coding	11023.9	-0.097754	0.0409233	-2.38871	0.0169075	0.104519
ENSG00000176731.11	C8orf59	protein_coding	2148.39	0.170094	0.0712289	2.38799	0.0169408	0.104552
ENSG00000177169.9	ULK1	protein_coding	2480.25	-0.154678	0.064765	-2.38829	0.016927	0.104552
ENSG00000134815.18	DHX34	protein_coding	1457.31	-0.205775	0.0861858	-2.38758	0.0169598	0.104583
ENSG00000153179.12	RASSF3	protein_coding	2149.41	0.16493	0.0690878	2.38725	0.0169748	0.104589
ENSG00000169136.10	ATF5	protein_coding	5520.67	-0.111969	0.0469204	-2.38636	0.0170159	0.104756
ENSG00000175634.14	RPS6KB2	protein_coding	4881.77	-0.121004	0.0507373	-2.38492	0.017083	0.105083
ENSG00000169972.11	PUSL1	protein_coding	1768.69	-0.192611	0.0808324	-2.38285	0.0171794	0.105589
ENSG00000131408.13	NR1H2	protein_coding	3664.48	-0.146824	0.061657	-2.3813	0.0172518	0.10586
ENSG00000062822.13	POLD1	protein_coding	4636.28	-0.133195	0.0559295	-2.38148	0.0172433	0.10586
ENSG00000105983.20	LMBR1	protein_coding	4670.49	0.122423	0.0514211	2.3808	0.017275	0.105916
ENSG00000138772.12	ANXA3	protein_coding	2561.83	-0.151354	0.0635814	-2.38048	0.0172902	0.105922
ENSG00000117899.10	MESDC2	protein_coding	2897.66	0.144992	0.0609207	2.38001	0.017312	0.105968
ENSG00000099814.15	CEP170B	protein_coding	2836.87	-0.157803	0.0663377	-2.37878	0.0173702	0.106151
ENSG00000105669.13	COPE	protein_coding	6573.11	-0.120171	0.0505168	-2.37884	0.0173672	0.106151
ENSG00000162980.16	ARL5A	protein_coding	3371.09	0.144984	0.0610384	2.37529	0.0175353	0.107073
ENSG00000141503.15	MINK1	protein_coding	3709.45	-0.132129	0.0556512	-2.37423	0.0175856	0.107225
ENSG00000266028.7	SRGAP2	protein_coding	3062	-0.141097	0.0594318	-2.3741	0.0175917	0.107225
ENSG00000152518.7	ZFP36L2	protein_coding	4135.01	-0.125249	0.0527617	-2.37386	0.0176032	0.107225
ENSG00000091483.6	FH	protein_coding	13334.9	0.0860966	0.0362887	2.37255	0.0176659	0.107519
ENSG00000106799.12	TGFBR1	protein_coding	1648.2	0.191961	0.0809292	2.37197	0.0176936	0.1076
ENSG00000143153.12	ATP1B1	protein_coding	2585.06	-0.149736	0.0631927	-2.36951	0.0178116	0.108191
ENSG00000060069.16	CTDP1	protein_coding	2009.66	-0.166916	0.0704488	-2.36932	0.0178209	0.108191
ENSG00000187239.16	FNBP1	protein_coding	2577.27	-0.152358	0.064312	-2.36904	0.0178341	0.108191
ENSG00000160741.16	CRTC2	protein_coding	1413.96	-0.199131	0.0840789	-2.36838	0.0178661	0.108209
ENSG00000149269.9	PAK1	protein_coding	1959.13	0.169761	0.0716708	2.36862	0.0178545	0.108209
ENSG00000123144.10	C19orf43	protein_coding	8020.97	-0.117733	0.0497195	-2.36795	0.0178871	0.108249
ENSG00000156374.14	PCGF6	protein_coding	1443.67	0.196103	0.0828274	2.36761	0.0179036	0.108261
ENSG00000106086.18	PLEKHA8	protein_coding	2483.96	0.158311	0.0669799	2.36356	0.0181001	0.109361
ENSG00000150630.3	VEGFC	protein_coding	1503.24	-0.191508	0.0810502	-2.36284	0.0181357	0.109474
ENSG00000170027.6	YWHAG	protein_coding	21949.6	0.0772515	0.0326979	2.36258	0.0181481	0.109474
ENSG00000139697.13	SBNO1	protein_coding	4992.3	0.123503	0.0523082	2.36107	0.0182223	0.109833
ENSG00000102048.15	ASB9	protein_coding	1764.91	0.177724	0.0753404	2.35894	0.0183271	0.11008
ENSG00000135241.16	PNPLA8	protein_coding	1861.22	0.182177	0.0772345	2.35875	0.0183368	0.11008
ENSG00000169230.9	PRELID1	protein_coding	16381.8	-0.0971851	0.0411823	-2.35988	0.018281	0.11008
ENSG00000135048.13	TMEM2	protein_coding	1508.85	0.191722	0.0812649	2.35922	0.0183135	0.11008
ENSG00000127824.13	TUBA4A	protein_coding	3769.41	-0.130522	0.0553217	-2.35932	0.0183084	0.11008
ENSG00000115866.10	DARS	protein_coding	4781.79	0.121119	0.0513771	2.35745	0.0184011	0.110289
ENSG00000230989.6	HSBP1	protein_coding	4391.28	0.123081	0.0522052	2.35764	0.0183917	0.110289
ENSG00000146729.9	GBAS	protein_coding	9325.59	0.102326	0.0434135	2.357	0.0184231	0.110332
ENSG00000083444.16	PLOD1	protein_coding	20541.3	-0.0792978	0.0336614	-2.35575	0.0184855	0.110617
ENSG00000172795.15	DCP2	protein_coding	1281.46	0.202928	0.086217	2.35368	0.0185884	0.111024
ENSG00000171262.11	FAM98B	protein_coding	3566.22	0.132131	0.0561376	2.3537	0.0185875	0.111024
ENSG00000165572.7	KBTBD6	protein_coding	1881.85	0.17108	0.0726951	2.35339	0.0186029	0.111024
ENSG00000176018.12	LYSMD3	protein_coding	3641.48	0.133133	0.0565862	2.35275	0.0186353	0.111024
ENSG00000248527.1	RP5-857K21.10	unprocessed_pseudogene	10668.6	-0.113783	0.0483622	-2.35273	0.0186363	0.111024
ENSG00000105849.5	TWISTNB	protein_coding	3871.69	0.1293	0.0549605	2.3526	0.0186426	0.111024
ENSG00000176619.12	LMNB2	protein_coding	16334.3	-0.0866641	0.0368722	-2.35039	0.0187538	0.111598
ENSG00000149231.12	CCDC82	protein_coding	1812.62	0.174502	0.0742822	2.34918	0.0188148	0.111715
ENSG00000205476.8	CCDC85C	protein_coding	3557.79	-0.130251	0.0554469	-2.34911	0.0188183	0.111715
ENSG00000164308.16	ERAP2	protein_coding	1937.14	0.179905	0.0765669	2.34965	0.0187912	0.111715
ENSG00000182004.12	SNRPE	protein_coding	2544.29	0.152076	0.0647766	2.34769	0.0188901	0.112052
ENSG00000145725.19	PPIP5K2	protein_coding	7906.08	0.108918	0.0463999	2.34738	0.0189059	0.112057
ENSG00000182149.20	IST1	protein_coding	4681.43	0.117252	0.0499577	2.34702	0.018924	0.112076
ENSG00000129667.12	RHBDF2	protein_coding	2683.87	-0.149584	0.0637491	-2.34645	0.0189532	0.11216
ENSG00000204116.11	CHIC1	protein_coding	1578.83	0.191131	0.0814708	2.34601	0.0189756	0.112203
ENSG00000138018.17	EPT1	protein_coding	5175.22	0.120936	0.051581	2.34459	0.0190481	0.112543
ENSG00000181789.14	COPG1	protein_coding	8619.95	-0.096449	0.0411636	-2.34307	0.0191259	0.112773
ENSG00000153561.12	RMND5A	protein_coding	3193.64	0.143058	0.0610591	2.34294	0.0191322	0.112773
ENSG00000213463.4	SYNJ2BP	protein_coding	7177.64	0.109697	0.046818	2.34306	0.0191264	0.112773
ENSG00000116459.10	ATP5F1	protein_coding	11357.8	0.0907841	0.0387754	2.34128	0.0192177	0.11314
ENSG00000155097.11	ATP6V1C1	protein_coding	6614.31	0.113004	0.0482702	2.34106	0.0192288	0.11314
ENSG00000197530.12	MIB2	protein_coding	3839.46	-0.154965	0.0662004	-2.34085	0.0192399	0.11314
ENSG00000119969.14	HELLS	protein_coding	2248.69	0.170288	0.0727856	2.33959	0.019305	0.113229
ENSG00000106049.8	HIBADH	protein_coding	4552.33	0.121668	0.0520047	2.33957	0.0193061	0.113229
ENSG00000197111.15	PCBP2	protein_coding	17761.4	-0.0843664	0.0360635	-2.33938	0.0193155	0.113229
ENSG00000101966.12	XIAP	protein_coding	3263.5	0.148448	0.063445	2.3398	0.0192942	0.113229
ENSG00000099624.7	ATP5D	protein_coding	2371.7	-0.164511	0.0703378	-2.33886	0.0193424	0.113298
ENSG00000167674.14	CTB-50L17.10	protein_coding	6616.59	-0.10961	0.0469088	-2.33667	0.0194563	0.113674
ENSG00000164284.14	GRPEL2	protein_coding	4183.07	0.121716	0.0520825	2.33699	0.01944	0.113674
ENSG00000130511.15	SSBP4	protein_coding	2968.91	-0.154858	0.0662719	-2.33671	0.0194541	0.113674
ENSG00000070269.13	TMEM260	protein_coding	1339.34	0.201072	0.0860586	2.33646	0.0194675	0.113674
ENSG00000099804.8	CDC34	protein_coding	3690.59	-0.137429	0.0588347	-2.33584	0.0194995	0.113772
ENSG00000168005.8	C11orf84	protein_coding	3380.58	-0.151316	0.0648155	-2.33456	0.0195662	0.113967
ENSG00000139505.11	MTMR6	protein_coding	2945.27	0.142769	0.0611489	2.33477	0.0195552	0.113967
ENSG00000128059.8	PPAT	protein_coding	4707.68	0.120246	0.0515183	2.33404	0.0195939	0.113967
ENSG00000106771.12	TMEM245	protein_coding	5548.83	0.112491	0.0481948	2.33409	0.019591	0.113967
ENSG00000204371.11	EHMT2	protein_coding	3934.75	-0.126815	0.0543461	-2.33347	0.0196234	0.11405
ENSG00000067064.11	IDI1	protein_coding	1666.1	0.181699	0.077883	2.33298	0.0196493	0.114113
ENSG00000132953.16	XPO4	protein_coding	5793.22	0.112129	0.0480796	2.33214	0.0196931	0.114278
ENSG00000112144.15	ICK	protein_coding	3952.43	0.129929	0.0557288	2.33144	0.0197299	0.114403
ENSG00000167600.13	CYP2S1	protein_coding	1265.2	-0.204603	0.0878157	-2.32992	0.0198106	0.114676
ENSG00000146535.13	GNA12	protein_coding	11087.2	-0.08804	0.0377953	-2.32939	0.0198383	0.114676
ENSG00000131446.16	MGAT1	protein_coding	11908.2	-0.0927652	0.0398207	-2.32957	0.0198286	0.114676
ENSG00000156482.10	RPL30	protein_coding	37892.4	0.070933	0.0304483	2.32962	0.019826	0.114676
ENSG00000071626.16	DAZAP1	protein_coding	8241.58	-0.0997682	0.0428504	-2.32829	0.0198967	0.114852
ENSG00000109184.14	DCUN1D4	protein_coding	3751.26	0.128569	0.0552216	2.32824	0.0198995	0.114852
ENSG00000109332.19	UBE2D3	protein_coding	9766.66	0.0907413	0.0389876	2.32744	0.0199417	0.115007
ENSG00000124207.16	CSE1L	protein_coding	48452.1	0.0828762	0.0356184	2.32678	0.0199769	0.115032
ENSG00000204843.12	DCTN1	protein_coding	9140.97	-0.094802	0.0407416	-2.32691	0.0199701	0.115032
ENSG00000168827.14	GFM1	protein_coding	3925.3	0.124289	0.0534285	2.32627	0.020004	0.1151
ENSG00000112078.13	KCTD20	protein_coding	5119.52	0.112557	0.0483924	2.32593	0.0200224	0.115117
ENSG00000091136.13	LAMB1	protein_coding	26119.5	0.0744816	0.032027	2.32559	0.0200406	0.115133
ENSG00000179364.13	PACS2	protein_coding	2216.08	-0.15752	0.0677541	-2.32487	0.0200788	0.115264
ENSG00000133243.8	BTBD2	protein_coding	5130.82	-0.114057	0.0490837	-2.32373	0.0201398	0.115392
ENSG00000166135.13	HIF1AN	protein_coding	4973.84	0.113795	0.0489799	2.32331	0.0201627	0.115392
ENSG00000170142.11	UBE2E1	protein_coding	5820.4	0.112153	0.0482696	2.32348	0.0201535	0.115392
ENSG00000177485.6	ZBTB33	protein_coding	3331.41	0.13262	0.0570652	2.324	0.0201253	0.115392
ENSG00000131174.4	COX7B	protein_coding	6125.92	0.112864	0.0486054	2.32204	0.0202309	0.11552
ENSG00000137504.13	CREBZF	protein_coding	3780.91	0.141437	0.0609042	2.32229	0.0202173	0.11552
ENSG00000125356.6	NDUFA1	protein_coding	2617.19	0.146936	0.0632792	2.32203	0.0202314	0.11552
ENSG00000135454.13	B4GALNT1	protein_coding	1804.97	-0.175388	0.0755691	-2.32089	0.0202926	0.115781
ENSG00000176055.9	MBLAC2	protein_coding	2243.51	0.15612	0.0672963	2.31988	0.0203472	0.116004
ENSG00000122218.14	COPA	protein_coding	15347.9	-0.0801974	0.0345804	-2.31916	0.0203863	0.116138
ENSG00000005007.12	UPF1	protein_coding	13481.4	-0.0886105	0.0382199	-2.31844	0.0204255	0.116273
ENSG00000067955.13	CBFB	protein_coding	4078.15	0.122925	0.053042	2.3175	0.0204764	0.116474
ENSG00000138095.18	LRPPRC	protein_coding	19555.4	0.083885	0.0362184	2.31609	0.0205535	0.116735
ENSG00000143393.16	PI4KB	protein_coding	4888.4	-0.114445	0.0494108	-2.3162	0.0205473	0.116735
ENSG00000138190.16	EXOC6	protein_coding	1299.5	0.198328	0.0856576	2.31536	0.0205934	0.116873
ENSG00000103197.17	TSC2	protein_coding	4444.91	-0.121578	0.0525177	-2.31498	0.0206139	0.1169
ENSG00000120437.8	ACAT2	protein_coding	1387.24	0.199413	0.0861667	2.31427	0.020653	0.116945
ENSG00000101457.12	DNTTIP1	protein_coding	5551.56	-0.117382	0.0507164	-2.31448	0.0206413	0.116945
ENSG00000177425.10	PAWR	protein_coding	2870.35	0.141874	0.0613649	2.31198	0.0207787	0.117554
ENSG00000177683.13	THAP5	protein_coding	1613.54	0.192719	0.0833653	2.31174	0.0207919	0.117554
ENSG00000116478.11	HDAC1	protein_coding	13409.2	0.0845542	0.0365879	2.31099	0.0208334	0.1177
ENSG00000076944.15	STXBP2	protein_coding	4756.05	-0.118065	0.0511338	-2.30893	0.0209472	0.118253
ENSG00000218739.9	CEBPZOS	protein_coding	3269.92	0.156333	0.0677403	2.30784	0.0210083	0.118508
ENSG00000138448.11	ITGAV	protein_coding	4218.39	0.124568	0.0539934	2.3071	0.0210492	0.11865
ENSG00000090273.13	NUDC	protein_coding	10310.4	-0.0998392	0.0432863	-2.30649	0.0210835	0.118753
ENSG00000106683.14	LIMK1	protein_coding	4381.82	-0.124307	0.053916	-2.30556	0.0211354	0.118956
ENSG00000197386.11	HTT	protein_coding	5198.56	-0.113517	0.0492606	-2.30441	0.0211994	0.119227
ENSG00000133805.15	AMPD3	protein_coding	1269.26	-0.19956	0.0866549	-2.30292	0.0212831	0.119517
ENSG00000125124.11	BBS2	protein_coding	1325.17	0.203796	0.0884951	2.30291	0.021284	0.119517
ENSG00000165392.9	WRN	protein_coding	1686.58	0.177828	0.0772276	2.30264	0.021299	0.119517
ENSG00000156709.13	AIFM1	protein_coding	7614.88	0.100965	0.0438749	2.3012	0.0213805	0.119705
ENSG00000133114.17	GPALPP1	protein_coding	1433.37	0.189253	0.082231	2.30148	0.0213644	0.119705
ENSG00000166987.14	MBD6	protein_coding	1460.1	-0.206972	0.0899337	-2.30139	0.0213696	0.119705
ENSG00000011009.10	LYPLA2	protein_coding	3573.95	-0.131242	0.0570845	-2.29909	0.0214998	0.120283
ENSG00000108256.8	NUFIP2	protein_coding	6807.54	0.10735	0.0466998	2.29873	0.0215202	0.120307
ENSG00000182872.15	RBM10	protein_coding	3451.58	-0.132413	0.0576313	-2.2976	0.0215848	0.120578
ENSG00000107438.8	PDLIM1	protein_coding	28837.6	0.0703412	0.03062	2.29723	0.0216054	0.120604
ENSG00000175756.13	AURKAIP1	protein_coding	10525.6	-0.109602	0.047726	-2.29648	0.0216485	0.120637
ENSG00000135476.11	ESPL1	protein_coding	3465.08	-0.12939	0.056334	-2.29684	0.0216281	0.120637
ENSG00000173898.12	SPTBN2	protein_coding	5106.98	-0.113245	0.0493166	-2.29628	0.0216598	0.120637
ENSG00000089327.14	FXYD5	protein_coding	2328.51	-0.15185	0.0661619	-2.29513	0.0217258	0.120914
ENSG00000136521.12	NDUFB5	protein_coding	3612.53	0.126984	0.0553393	2.29464	0.0217539	0.120981
ENSG00000157637.12	SLC38A10	protein_coding	5790.62	-0.112909	0.0492188	-2.29403	0.0217889	0.121086
ENSG00000147202.17	DIAPH2	protein_coding	1305.73	0.196491	0.0856776	2.29337	0.0218264	0.121173
ENSG00000095002.14	MSH2	protein_coding	6188.23	0.114104	0.0497697	2.29264	0.0218687	0.121173
ENSG00000110660.14	SLC35F2	protein_coding	13837.5	0.0820689	0.0357968	2.29263	0.0218694	0.121173
ENSG00000149930.17	TAOK2	protein_coding	4033.06	-0.122438	0.0534	-2.29284	0.0218572	0.121173
ENSG00000152795.17	HNRNPDL	protein_coding	12524.3	0.0933834	0.0408051	2.28852	0.022107	0.122268
ENSG00000099246.16	RAB18	protein_coding	3611.79	0.128078	0.0559689	2.28837	0.022116	0.122268
ENSG00000072042.12	RDH11	protein_coding	15304.4	0.0791151	0.0345717	2.28844	0.0221121	0.122268
ENSG00000173020.10	ADRBK1	protein_coding	7768.72	-0.0968403	0.0423836	-2.28485	0.0223213	0.122497
ENSG00000204310.12	AGPAT1	protein_coding	5525	-0.107715	0.0471333	-2.28532	0.0222943	0.122497
ENSG00000168564.5	CDKN2AIP	protein_coding	4154.88	0.120061	0.0525186	2.28607	0.02225	0.122497
ENSG00000172292.14	CERS6	protein_coding	3097.35	0.147465	0.0645374	2.28495	0.0223156	0.122497
ENSG00000112514.15	CUTA	protein_coding	3514.7	-0.137935	0.0603547	-2.2854	0.0222893	0.122497
ENSG00000113719.15	ERGIC1	protein_coding	13208.7	-0.0818901	0.0358016	-2.28733	0.0221764	0.122497
ENSG00000242616.3	GNG10	protein_coding	2331.54	0.155071	0.0678517	2.28544	0.0222873	0.122497
ENSG00000010322.15	NISCH	protein_coding	3374.5	-0.130798	0.0571899	-2.28709	0.0221908	0.122497
ENSG00000065154.11	OAT	protein_coding	4872.91	0.121451	0.0531281	2.28601	0.0222537	0.122497
ENSG00000099341.11	PSMD8	protein_coding	8189.24	-0.0986264	0.0431335	-2.28654	0.0222227	0.122497
ENSG00000129968.15	ABHD17A	protein_coding	2647.46	-0.176998	0.0774913	-2.2841	0.0223657	0.122561
ENSG00000170852.10	KBTBD2	protein_coding	2667.55	0.151207	0.0661932	2.28432	0.0223525	0.122561
ENSG00000156304.14	SCAF4	protein_coding	3859.56	-0.124357	0.0544566	-2.2836	0.0223952	0.122632
ENSG00000112658.7	SRF	protein_coding	4073.55	-0.121993	0.0534351	-2.283	0.0224301	0.122734
ENSG00000277203.1	F8A1	protein_coding	2245.56	-0.15908	0.0697031	-2.28226	0.0224742	0.122885
ENSG00000147687.18	TATDN1	protein_coding	1854.27	0.176451	0.0773665	2.28072	0.0225651	0.123292
ENSG00000126934.13	MAP2K2	protein_coding	6725.16	-0.107074	0.0469811	-2.2791	0.0226613	0.123727
ENSG00000264364.2	DYNLL2	protein_coding	8652.78	0.0964897	0.0423529	2.27823	0.0227129	0.123919
ENSG00000123989.13	CHPF	protein_coding	8519.25	-0.110612	0.0486041	-2.27578	0.0228593	0.124536
ENSG00000165516.10	KLHDC2	protein_coding	2886.21	0.139762	0.061412	2.27582	0.0228569	0.124536
ENSG00000111581.9	NUP107	protein_coding	3686.73	0.134833	0.0592681	2.27497	0.0229079	0.12471
ENSG00000145293.15	ENOPH1	protein_coding	1970.93	0.16976	0.0746314	2.27465	0.0229271	0.124724
ENSG00000185787.14	MORF4L1	protein_coding	10093.3	0.0900332	0.0396062	2.27321	0.0230135	0.125102
ENSG00000275895.6	U2AF1L5	protein_coding	3534.95	0.129381	0.0569466	2.27198	0.023088	0.125416
ENSG00000079950.13	STX7	protein_coding	1444.39	0.18506	0.0814707	2.27149	0.0231171	0.125483
ENSG00000140374.15	ETFA	protein_coding	3977.27	0.127415	0.0561261	2.27016	0.0231976	0.125583
ENSG00000253738.1	GS1-251I9.4	antisense	2351.88	0.155349	0.0684241	2.27039	0.0231842	0.125583
ENSG00000165271.16	NOL6	protein_coding	3885.16	-0.122827	0.0541272	-2.26923	0.0232543	0.125583
ENSG00000144815.15	NXPE3	protein_coding	3056.51	0.133803	0.0589495	2.26979	0.0232202	0.125583
ENSG00000169398.19	PTK2	protein_coding	18098.1	0.0756175	0.0333163	2.26969	0.0232266	0.125583
ENSG00000211456.10	SACM1L	protein_coding	4809.77	0.116316	0.0512594	2.26918	0.0232577	0.125583
ENSG00000133028.10	SCO1	protein_coding	3264.03	0.130451	0.0574616	2.27023	0.0231933	0.125583
ENSG00000177156.10	TALDO1	protein_coding	7640.65	-0.0963921	0.0424826	-2.26898	0.0232698	0.125583
ENSG00000144713.12	RPL32	protein_coding	20747	-0.0755674	0.0333309	-2.26719	0.0233785	0.126079
ENSG00000234545.7	FAM133B	protein_coding	2005.01	0.162118	0.071545	2.26596	0.0234537	0.12612
ENSG00000151151.5	IPMK	protein_coding	1573.78	0.180852	0.0798091	2.26606	0.0234478	0.12612
ENSG00000102317.17	RBM3	protein_coding	14995.6	0.0846176	0.0373369	2.26633	0.0234314	0.12612
ENSG00000099956.19	SMARCB1	protein_coding	3789.07	-0.126833	0.055969	-2.26613	0.0234434	0.12612
ENSG00000187257.15	RSBN1L	protein_coding	2435.6	0.149013	0.0657835	2.2652	0.0235007	0.126283
ENSG00000167770.11	OTUB1	protein_coding	5973.57	-0.108642	0.0479777	-2.26443	0.0235474	0.126443
ENSG00000164754.14	RAD21	protein_coding	22595.2	0.0864603	0.0381866	2.26415	0.0235647	0.126445
ENSG00000132478.9	UNK	protein_coding	2262.35	-0.153505	0.0678322	-2.26301	0.023635	0.126731
ENSG00000153006.15	SREK1IP1	protein_coding	1808.17	0.172831	0.0763825	2.2627	0.0236542	0.126743
ENSG00000133056.13	PIK3C2B	protein_coding	1987.56	-0.160214	0.0708177	-2.26235	0.0236759	0.126769
ENSG00000176720.5	BOK	protein_coding	2189.73	-0.170341	0.0753623	-2.26029	0.0238032	0.127177
ENSG00000105447.12	GRWD1	protein_coding	3356.38	-0.136614	0.0604293	-2.26073	0.0237761	0.127177
ENSG00000071537.13	SEL1L	protein_coding	6243.75	0.113525	0.05022	2.26055	0.0237871	0.127177
ENSG00000277258.4	PCGF2	protein_coding	2212.34	-0.1536	0.0679752	-2.25965	0.0238431	0.127209
ENSG00000157020.17	SEC13	protein_coding	7480.9	-0.103079	0.0456146	-2.25978	0.0238349	0.127209
ENSG00000141736.13	ERBB2	protein_coding	3317.48	-0.130124	0.0576004	-2.25908	0.0238787	0.127308
ENSG00000100813.14	ACIN1	protein_coding	8682.34	-0.0910279	0.0403252	-2.25735	0.0239864	0.1277
ENSG00000065135.10	GNAI3	protein_coding	6244.87	0.103622	0.0459036	2.25739	0.0239839	0.1277
ENSG00000157224.15	CLDN12	protein_coding	2093.43	0.171754	0.076114	2.25654	0.024037	0.127799
ENSG00000090006.17	LTBP4	protein_coding	1796.46	-0.169257	0.0750085	-2.2565	0.0240391	0.127799
ENSG00000171298.12	GAA	protein_coding	4597.03	-0.12243	0.0542951	-2.2549	0.0241395	0.128241
ENSG00000135318.11	NT5E	protein_coding	5254.91	0.108837	0.048292	2.25372	0.024214	0.128546
ENSG00000179431.6	FJX1	protein_coding	1735.63	-0.175029	0.077692	-2.25286	0.0242678	0.12874
ENSG00000134882.15	UBAC2	protein_coding	3022.36	0.133267	0.0591893	2.25154	0.0243516	0.129093
ENSG00000106392.10	C1GALT1	protein_coding	2198.19	0.166749	0.0740768	2.25103	0.0243834	0.12917
ENSG00000087266.15	SH3BP2	protein_coding	1306.09	-0.194172	0.086293	-2.25014	0.0244398	0.129377
ENSG00000142208.15	AKT1	protein_coding	13106.5	-0.0841095	0.0374128	-2.24815	0.0245666	0.129739
ENSG00000162636.15	FAM102B	protein_coding	1608.1	0.180849	0.080448	2.24802	0.024575	0.129739
ENSG00000072518.20	MARK2	protein_coding	3345.28	-0.130023	0.0578399	-2.24798	0.0245775	0.129739
ENSG00000173436.13	MINOS1	protein_coding	3083.27	0.150317	0.0668549	2.24841	0.0245502	0.129739
ENSG00000087274.16	ADD1	protein_coding	7061.29	-0.0992262	0.0441606	-2.24694	0.0246438	0.129814
ENSG00000184967.6	NOC4L	protein_coding	1466.61	-0.197908	0.0880634	-2.24734	0.0246183	0.129814
ENSG00000196922.10	ZNF252P	transcribed_unprocessed_pseudogene	4359.47	0.122774	0.0546366	2.24711	0.024633	0.129814
ENSG00000139637.13	C12orf10	protein_coding	1778.98	-0.172805	0.0769178	-2.24662	0.0246642	0.12983
ENSG00000101311.15	FERMT1	protein_coding	5589.56	-0.115093	0.0512381	-2.24625	0.0246882	0.129865
ENSG00000144366.15	GULP1	protein_coding	9225.49	0.103351	0.0460257	2.24551	0.0247356	0.130023
ENSG00000066136.20	NFYC	protein_coding	1833.54	-0.16899	0.0752946	-2.24438	0.0248078	0.13031
ENSG00000100605.16	ITPK1	protein_coding	5118.65	-0.111278	0.0495881	-2.24404	0.0248299	0.130335
ENSG00000185024.16	BRF1	protein_coding	2517.77	-0.149192	0.0665223	-2.24274	0.0249138	0.130495
ENSG00000135723.13	FHOD1	protein_coding	2181.2	-0.161052	0.0718273	-2.24221	0.0249476	0.130495
ENSG00000047932.13	GOPC	protein_coding	2397.53	0.147297	0.0656806	2.24263	0.0249209	0.130495
ENSG00000111358.13	GTF2H3	protein_coding	2662.64	0.13997	0.0624197	2.2424	0.0249356	0.130495
ENSG00000168066.20	SF1	protein_coding	13271.4	-0.0852324	0.0380125	-2.24222	0.0249472	0.130495
ENSG00000108828.15	VAT1	protein_coding	7858.35	-0.0943345	0.0420821	-2.24168	0.0249822	0.130585
ENSG00000185803.9	SLC52A2	protein_coding	8749.8	-0.121229	0.0540883	-2.24131	0.025006	0.130618
ENSG00000198898.13	CAPZA2	protein_coding	6188.07	0.104626	0.0466959	2.24058	0.0250532	0.1307
ENSG00000179271.2	GADD45GIP1	protein_coding	6526.27	-0.122956	0.0548783	-2.24053	0.0250568	0.1307
ENSG00000137714.2	FDX1	protein_coding	2365.66	0.150037	0.0670051	2.23919	0.0251434	0.131061
ENSG00000006715.15	VPS41	protein_coding	4078	0.120603	0.0538883	2.23803	0.0252194	0.131366
ENSG00000196072.11	BLOC1S2	protein_coding	1507.93	0.179875	0.0804459	2.23598	0.0253534	0.13188
ENSG00000185340.15	GAS2L1	protein_coding	4608.48	-0.124226	0.0555559	-2.23605	0.0253488	0.13188
ENSG00000155304.5	HSPA13	protein_coding	4375.46	0.121306	0.0542608	2.23561	0.025377	0.131911
ENSG00000137497.17	NUMA1	protein_coding	11112.2	-0.0866294	0.0387945	-2.23303	0.0255469	0.132702
ENSG00000165704.14	HPRT1	protein_coding	4002.73	0.120911	0.0541667	2.23221	0.0256012	0.132892
ENSG00000198380.12	GFPT1	protein_coding	7890.57	0.0990084	0.0443774	2.23106	0.0256775	0.133195
ENSG00000121022.13	COPS5	protein_coding	2746.72	0.157323	0.070533	2.23048	0.0257153	0.133299
ENSG00000177889.9	UBE2N	protein_coding	4809.8	0.110442	0.049525	2.23002	0.0257462	0.133367
ENSG00000159692.15	CTBP1	protein_coding	5921.11	-0.10982	0.0493503	-2.22532	0.0260599	0.134899
ENSG00000127580.15	WDR24	protein_coding	1237.53	-0.20159	0.0906164	-2.22466	0.0261043	0.135034
ENSG00000134001.12	EIF2S1	protein_coding	25749.1	0.0725398	0.0326219	2.22365	0.0261718	0.135291
ENSG00000196591.11	HDAC2	protein_coding	7456.92	0.0943031	0.0424219	2.22298	0.0262169	0.135371
ENSG00000167566.16	NCKAP5L	protein_coding	1403.4	-0.184304	0.082912	-2.22289	0.0262235	0.135371
ENSG00000072062.13	PRKACA	protein_coding	7821.12	-0.0931114	0.0419015	-2.22215	0.0262732	0.135534
ENSG00000128524.4	ATP6V1F	protein_coding	5472.98	-0.119214	0.0536741	-2.22108	0.0263455	0.135813
ENSG00000196526.10	AFAP1	protein_coding	10339.8	-0.0862233	0.0388636	-2.21861	0.0265132	0.136355
ENSG00000171130.17	ATP6V0E2	protein_coding	3284.68	-0.131292	0.0591731	-2.21878	0.0265015	0.136355
ENSG00000130810.19	PPAN	protein_coding	6105.7	-0.110663	0.0498694	-2.21906	0.0264826	0.136355
ENSG00000023041.11	ZDHHC6	protein_coding	1414.1	0.186103	0.0838882	2.21846	0.0265236	0.136355
ENSG00000103202.12	NME4	protein_coding	5573.47	-0.112624	0.0507845	-2.21769	0.0265759	0.13653
ENSG00000169032.9	MAP2K1	protein_coding	5164.19	0.10668	0.0481243	2.21675	0.0266402	0.136766
ENSG00000182173.12	TSEN54	protein_coding	2021.16	-0.159169	0.0718318	-2.21586	0.0267014	0.136987
ENSG00000198198.15	SZT2	protein_coding	1795.66	-0.164253	0.0741715	-2.2145	0.0267942	0.137369
ENSG00000026508.18	CD44	protein_coding	33162.5	-0.079641	0.0359827	-2.21332	0.0268759	0.137468
ENSG00000258366.8	RTEL1	protein_coding	2385.78	-0.144457	0.065272	-2.21315	0.0268872	0.137468
ENSG00000006282.20	SPATA20	protein_coding	3593.2	-0.129756	0.0586226	-2.2134	0.0268699	0.137468
ENSG00000171940.13	ZNF217	protein_coding	11020.6	0.0981317	0.0443309	2.21362	0.0268551	0.137468
ENSG00000173812.10	EIF1	protein_coding	15340.2	0.0821593	0.0371358	2.2124	0.0269392	0.13764
ENSG00000250479.8	CHCHD10	protein_coding	2512.69	-0.143915	0.0651075	-2.21042	0.0270761	0.138035
ENSG00000237649.7	KIFC1	protein_coding	3217.82	-0.130878	0.0592282	-2.20973	0.0271238	0.138035
ENSG00000104973.17	MED25	protein_coding	4598.09	-0.117126	0.0529774	-2.21087	0.0270447	0.138035
ENSG00000077312.8	SNRPA	protein_coding	3983.6	-0.117769	0.0532868	-2.2101	0.0270982	0.138035
ENSG00000164808.16	SPIDR	protein_coding	1836.22	0.162234	0.0734079	2.21003	0.0271028	0.138035
ENSG00000084073.8	ZMPSTE24	protein_coding	7972.3	0.0917937	0.0415416	2.20968	0.0271273	0.138035
ENSG00000145337.4	PYURF	protein_coding	4387.7	0.113078	0.0512042	2.20837	0.0272183	0.138404
ENSG00000078124.11	ACER3	protein_coding	4526.27	0.121002	0.0548501	2.20606	0.02738	0.139125
ENSG00000164187.6	LMBRD2	protein_coding	2177.56	0.154616	0.0700948	2.20581	0.0273972	0.139125
ENSG00000203950.6	FAM127B	protein_coding	2749.27	-0.136153	0.0617431	-2.20515	0.0274437	0.139267
ENSG00000196313.11	POM121	protein_coding	13085.3	-0.0834476	0.0378765	-2.20315	0.0275841	0.139739
ENSG00000092098.16	RNF31	protein_coding	2704.51	-0.139916	0.0634968	-2.20351	0.027559	0.139739
ENSG00000054654.16	SYNE2	protein_coding	1641.11	-0.175383	0.0796196	-2.20276	0.0276116	0.139739
ENSG00000018408.14	WWTR1	protein_coding	13333	0.085264	0.0387076	2.20277	0.0276107	0.139739
ENSG00000147601.13	TERF1	protein_coding	3934.56	0.125323	0.0569011	2.20248	0.0276317	0.139747
ENSG00000198791.11	CNOT7	protein_coding	1552.07	0.174005	0.0790653	2.20078	0.0277516	0.140258
ENSG00000205542.10	TMSB4X	protein_coding	28511.8	0.0762877	0.0346847	2.19946	0.027845	0.140635
ENSG00000182774.11	RPS17	protein_coding	17687.4	0.0778548	0.0354083	2.19877	0.0278941	0.140788
ENSG00000117500.12	TMED5	protein_coding	7097.9	0.108424	0.0493324	2.19783	0.027961	0.141031
ENSG00000167522.15	ANKRD11	protein_coding	10300.3	-0.0853608	0.0388533	-2.197	0.0280204	0.141037
ENSG00000182307.12	C8orf33	protein_coding	6999.91	0.0970005	0.0441615	2.19649	0.0280566	0.141037
ENSG00000167193.7	CRK	protein_coding	5791.65	0.102762	0.0467621	2.19754	0.0279819	0.141037
ENSG00000111321.10	LTBR	protein_coding	6807.06	-0.0989164	0.0450188	-2.19722	0.0280045	0.141037
ENSG00000034510.5	TMSB10	protein_coding	31157.4	-0.07539	0.0343206	-2.19664	0.0280461	0.141037
ENSG00000183684.7	ALYREF	protein_coding	6559.16	-0.107266	0.0488486	-2.19589	0.0280996	0.141064
ENSG00000146587.17	RBAK	protein_coding	2647.65	0.146778	0.066837	2.19606	0.0280878	0.141064
ENSG00000177628.15	GBA	protein_coding	2329.95	-0.151894	0.069221	-2.19434	0.0282111	0.141529
ENSG00000164828.17	SUN1	protein_coding	9707.02	0.0873297	0.0398063	2.19387	0.0282449	0.141603
ENSG00000121749.15	TBC1D15	protein_coding	1512.56	0.182515	0.0832252	2.19303	0.0283053	0.141811
ENSG00000123131.12	PRDX4	protein_coding	6399.19	0.105294	0.0480212	2.19267	0.0283315	0.141847
ENSG00000175390.13	EIF3F	protein_coding	7080.15	-0.0985065	0.0449332	-2.19229	0.0283588	0.141889
ENSG00000213024.11	NUP62	protein_coding	9676.79	-0.087994	0.0401522	-2.19151	0.028415	0.142075
ENSG00000150347.15	ARID5B	protein_coding	3490.88	-0.123646	0.0564514	-2.19031	0.0285019	0.142414
ENSG00000008952.16	SEC62	protein_coding	7550.77	0.095159	0.0434573	2.18971	0.0285449	0.142534
ENSG00000136143.15	SUCLA2	protein_coding	6409.45	0.124559	0.0568952	2.18927	0.0285769	0.142599
ENSG00000111666.10	CHPT1	protein_coding	3040.55	0.133986	0.0612355	2.18805	0.0286662	0.142881
ENSG00000128791.11	TWSG1	protein_coding	10175.8	0.0855807	0.0391142	2.18797	0.0286718	0.142881
ENSG00000177728.16	KIAA0195	protein_coding	3091.21	-0.128208	0.0586338	-2.18659	0.0287726	0.143289
ENSG00000084207.16	GSTP1	protein_coding	12498.9	-0.0967489	0.0442562	-2.18611	0.0288077	0.143309
ENSG00000101911.12	PRPS2	protein_coding	5408.58	0.103377	0.0472904	2.18601	0.0288152	0.143309
ENSG00000139146.13	FAM60A	protein_coding	2572.52	0.146435	0.066998	2.18566	0.0288407	0.143341
ENSG00000119048.7	UBE2B	protein_coding	1485.44	0.181915	0.0832971	2.18393	0.0289672	0.143874
ENSG00000105819.13	PMPCB	protein_coding	4752.56	0.114061	0.0522442	2.18324	0.0290185	0.144033
ENSG00000137962.12	ARHGAP29	protein_coding	24254.3	-0.0754552	0.0345934	-2.1812	0.0291686	0.144683
ENSG00000173542.8	MOB1B	protein_coding	3362.22	0.130542	0.0598603	2.18078	0.0291996	0.144691
ENSG00000213445.9	SIPA1	protein_coding	2771.59	-0.140305	0.0643407	-2.18065	0.0292091	0.144691
ENSG00000024526.16	DEPDC1	protein_coding	3897.06	0.123149	0.0564899	2.18001	0.0292564	0.14483
ENSG00000165355.7	FBXO33	protein_coding	1564.98	0.179421	0.0823451	2.17888	0.0293403	0.145149
ENSG00000164062.12	APEH	protein_coding	12135.1	-0.0829637	0.0380905	-2.17806	0.0294012	0.145354
ENSG00000145545.11	SRD5A1	protein_coding	1774.27	0.168815	0.077529	2.17744	0.0294475	0.145487
ENSG00000099364.16	FBXL19	protein_coding	2725.76	-0.140638	0.0646558	-2.17518	0.0296164	0.146225
ENSG00000171302.16	CANT1	protein_coding	12063.2	-0.0833236	0.0383393	-2.17332	0.0297563	0.146275
ENSG00000039523.19	FAM65A	protein_coding	3680.85	-0.121169	0.0557471	-2.17355	0.0297392	0.146275
ENSG00000168672.3	FAM84B	protein_coding	1315.34	-0.186353	0.08576	-2.17296	0.0297831	0.146275
ENSG00000090339.8	ICAM1	protein_coding	3260.59	-0.128477	0.0591012	-2.17384	0.0297169	0.146275
ENSG00000076662.9	ICAM3	protein_coding	1529.2	-0.18499	0.0851274	-2.1731	0.0297731	0.146275
ENSG00000104341.16	LAPTM4B	protein_coding	14112.7	0.0766289	0.0352558	2.17351	0.029742	0.146275
ENSG00000145740.18	SLC30A5	protein_coding	4008.58	0.11651	0.0535911	2.17405	0.0297017	0.146275
ENSG00000114062.18	UBE3A	protein_coding	8395.48	0.0940007	0.0432393	2.17397	0.0297077	0.146275
ENSG00000108262.15	GIT1	protein_coding	3112.65	-0.129443	0.0595963	-2.172	0.0298557	0.146441
ENSG00000171208.9	NETO2	protein_coding	3018.54	0.131624	0.0606004	2.172	0.0298559	0.146441
ENSG00000157870.14	FAM213B	protein_coding	7488.91	-0.104399	0.0480787	-2.17141	0.0299001	0.146561
ENSG00000139718.10	SETD1B	protein_coding	1701.78	-0.164462	0.0758323	-2.16876	0.0301007	0.147448
ENSG00000117984.13	CTSD	protein_coding	22960.9	-0.0749333	0.0345751	-2.16726	0.0302148	0.147813
ENSG00000020922.12	MRE11A	protein_coding	3006.8	0.133237	0.0614738	2.16738	0.0302058	0.147813
ENSG00000099901.16	RANBP1	protein_coding	6960.64	-0.105183	0.0485421	-2.16684	0.0302471	0.147874
ENSG00000204394.12	VARS	protein_coding	11704.4	-0.0928618	0.0429268	-2.16326	0.0305212	0.149117
ENSG00000180104.15	EXOC3	protein_coding	2683.75	-0.135051	0.0624643	-2.16205	0.0306142	0.149246
ENSG00000061273.17	HDAC7	protein_coding	3950.67	-0.118038	0.0545995	-2.16188	0.0306273	0.149246
ENSG00000091039.16	OSBPL8	protein_coding	6281.33	0.107416	0.0496861	2.16188	0.0306271	0.149246
ENSG00000180957.17	PITPNB	protein_coding	5519.12	0.105524	0.0487966	2.16253	0.0305773	0.149246
ENSG00000125817.7	CENPB	protein_coding	13880.8	-0.0902891	0.0417776	-2.16118	0.0306811	0.149313
ENSG00000126012.11	KDM5C	protein_coding	7112.35	-0.098181	0.0454267	-2.1613	0.0306718	0.149313
ENSG00000014919.12	COX15	protein_coding	3655.19	0.118692	0.0549277	2.16087	0.0307054	0.149334
ENSG00000159069.13	FBXW5	protein_coding	2821.16	-0.147457	0.0682511	-2.1605	0.0307339	0.149376
ENSG00000132002.7	DNAJB1	protein_coding	13631	-0.0807246	0.0373686	-2.16022	0.0307555	0.149384
ENSG00000116016.13	EPAS1	protein_coding	1640.9	-0.167881	0.0777472	-2.15932	0.0308255	0.149449
ENSG00000262814.7	MRPL12	protein_coding	7553.68	-0.111961	0.0518441	-2.15958	0.0308055	0.149449
ENSG00000142327.12	RNPEPL1	protein_coding	2488.56	-0.151198	0.0700225	-2.15927	0.0308289	0.149449
ENSG00000169188.4	APEX2	protein_coding	3581.67	-0.119387	0.0553002	-2.15888	0.0308592	0.149489
ENSG00000117877.10	CD3EAP	protein_coding	1820.5	-0.16021	0.0742263	-2.15839	0.0308971	0.149489
ENSG00000110172.11	CHORDC1	protein_coding	4339.33	0.122348	0.0566824	2.15848	0.0308901	0.149489
ENSG00000197006.13	METTL9	protein_coding	7109.96	0.0950858	0.0440707	2.15758	0.0309608	0.149604
ENSG00000104969.9	SGTA	protein_coding	5811.86	-0.112563	0.0521665	-2.15775	0.0309469	0.149604
ENSG00000148840.10	PPRC1	protein_coding	4635.76	-0.109824	0.0509129	-2.15709	0.0309987	0.14969
ENSG00000125249.6	RAP2A	protein_coding	4217.03	0.116282	0.0539349	2.15597	0.0310861	0.149919
ENSG00000237523.1	RP11-40F6.2	lincRNA	1495.58	-0.173002	0.0802379	-2.15611	0.0310753	0.149919
ENSG00000065183.15	WDR3	protein_coding	5240.47	0.109466	0.0507818	2.15561	0.0311138	0.149956
ENSG00000186908.14	ZDHHC17	protein_coding	1932.37	0.155697	0.0722386	2.15531	0.0311375	0.149973
ENSG00000106603.18	COA1	protein_coding	3178.44	0.126809	0.0588556	2.15458	0.0311951	0.150154
ENSG00000097007.17	ABL1	protein_coding	3661.16	-0.125074	0.0580669	-2.15396	0.031243	0.150288
ENSG00000127920.5	GNG11	protein_coding	1459.25	0.183116	0.0850317	2.1535	0.0312797	0.150368
ENSG00000198837.9	DENND4B	protein_coding	3382.82	-0.124229	0.0577051	-2.15282	0.0313327	0.150436
ENSG00000015532.9	XYLT2	protein_coding	2983.98	-0.130796	0.060756	-2.1528	0.0313341	0.150436
ENSG00000186312.10	CA5BP	transcribed_unprocessed_pseudogene	1302.61	-0.184856	0.0858861	-2.15234	0.0313707	0.150515
ENSG00000117528.11	ABCD3	protein_coding	3787.3	0.119145	0.0553696	2.15181	0.0314127	0.150548
ENSG00000137312.14	FLOT1	protein_coding	8238.75	-0.097626	0.0453849	-2.15107	0.031471	0.150548
ENSG00000152520.13	PAN3	protein_coding	2474.93	0.141815	0.0659227	2.15124	0.0314573	0.150548
ENSG00000139746.15	RBM26	protein_coding	2792	0.136092	0.0632667	2.15108	0.03147	0.150548
ENSG00000138760.9	SCARB2	protein_coding	6816.97	0.0951899	0.0442563	2.15088	0.0314859	0.150548
ENSG00000160181.8	TFF2	protein_coding	1396.02	-0.198146	0.0921301	-2.15072	0.0314984	0.150548
ENSG00000005339.14	CREBBP	protein_coding	4458.3	-0.117591	0.0547511	-2.14773	0.0317348	0.151581
ENSG00000164932.12	CTHRC1	protein_coding	2536.94	0.143261	0.0667131	2.14741	0.0317605	0.151607
ENSG00000165672.6	PRDX3	protein_coding	6777.38	0.101314	0.0472213	2.14552	0.0319117	0.152232
ENSG00000111786.8	SRSF9	protein_coding	9806.71	0.0898244	0.0418821	2.14469	0.0319773	0.152448
ENSG00000129226.13	CD68	protein_coding	1334.02	-0.18358	0.0857053	-2.14199	0.0321945	0.153288
ENSG00000132603.13	NIP7	protein_coding	3690.52	0.120384	0.056197	2.14217	0.0321795	0.153288
ENSG00000204316.12	MRPL38	protein_coding	4338.86	-0.125512	0.0586553	-2.13983	0.0323685	0.15392
ENSG00000132382.14	MYBBP1A	protein_coding	6514.11	-0.0974113	0.0455221	-2.13987	0.0323653	0.15392
ENSG00000090054.14	SPTLC1	protein_coding	2969.01	0.127863	0.0597949	2.13836	0.0324879	0.15439
ENSG00000188342.11	GTF2F2	protein_coding	2644.68	0.135139	0.0632536	2.13646	0.0326416	0.154923
ENSG00000068697.6	LAPTM4A	protein_coding	8581.98	0.0894436	0.0418652	2.13646	0.0326416	0.154923
ENSG00000141030.12	COPS3	protein_coding	5093.56	0.105111	0.0492157	2.13572	0.0327022	0.155112
ENSG00000142910.15	TINAGL1	protein_coding	4496.4	-0.112084	0.0525113	-2.13448	0.0328034	0.155494
ENSG00000106443.16	PHF14	protein_coding	5385.32	0.109327	0.0512605	2.13278	0.0329428	0.156056
ENSG00000088766.11	CRLS1	protein_coding	3637.27	0.118146	0.055419	2.13187	0.0330177	0.156312
ENSG00000096070.19	BRPF3	protein_coding	3066.22	-0.127239	0.0597	-2.1313	0.0330645	0.156434
ENSG00000179134.15	SAMD4B	protein_coding	3897.53	-0.120745	0.0566843	-2.13012	0.0331615	0.156695
ENSG00000021574.12	SPAST	protein_coding	1543.91	0.170273	0.0799341	2.13017	0.0331577	0.156695
ENSG00000075275.16	CELSR1	protein_coding	3155.39	-0.134865	0.0633475	-2.12898	0.0332559	0.156933
ENSG00000066855.15	MTFR1	protein_coding	2530.5	0.137249	0.0644744	2.12873	0.0332766	0.156933
ENSG00000160113.5	NR2F6	protein_coding	3945.1	-0.129826	0.0609941	-2.1285	0.0332957	0.156933
ENSG00000008988.9	RPS20	protein_coding	9064.35	0.087101	0.0409068	2.12926	0.0332331	0.156933
ENSG00000114779.19	ABHD14B	protein_coding	2611.53	-0.139039	0.065335	-2.12809	0.0333297	0.156979
ENSG00000035862.12	TIMP2	protein_coding	11641.9	-0.0861415	0.0404824	-2.12787	0.0333476	0.156979
ENSG00000143013.12	LMO4	protein_coding	3281.07	-0.126198	0.0593165	-2.12754	0.0333755	0.157012
ENSG00000166913.12	YWHAB	protein_coding	32273.4	0.0640145	0.0301037	2.12646	0.0334646	0.157332
ENSG00000133104.12	SPG20	protein_coding	2415.27	0.139942	0.0658362	2.12561	0.0335359	0.15739
ENSG00000130725.7	UBE2M	protein_coding	7812.18	-0.0922647	0.0434051	-2.12566	0.0335313	0.15739
ENSG00000169764.15	UGP2	protein_coding	3716.28	0.119146	0.056054	2.12556	0.03354	0.15739
ENSG00000161970.13	RPL26	protein_coding	13795.8	0.0755179	0.0355408	2.12482	0.0336017	0.15758
ENSG00000134987.11	WDR36	protein_coding	4962.79	0.110623	0.0520837	2.12395	0.0336742	0.157821
ENSG00000099991.17	CABIN1	protein_coding	2514.72	-0.137265	0.0646748	-2.12239	0.0338054	0.158139
ENSG00000126903.15	SLC10A3	protein_coding	3685.21	-0.120975	0.0569904	-2.12273	0.0337766	0.158139
ENSG00000105397.13	TYK2	protein_coding	6016.74	-0.0976269	0.0459964	-2.12249	0.0337964	0.158139
ENSG00000058729.10	RIOK2	protein_coding	1930.28	0.161759	0.0762866	2.12042	0.033971	0.158814
ENSG00000185000.11	DGAT1	protein_coding	3313.67	-0.130329	0.06148	-2.11986	0.0340182	0.158837
ENSG00000087365.15	SF3B2	protein_coding	20646.2	-0.0686154	0.0323666	-2.11994	0.034011	0.158837
ENSG00000105290.11	APLP1	protein_coding	1908.63	-0.153398	0.0724044	-2.11862	0.0341224	0.159093
ENSG00000105640.12	RPL18A	protein_coding	34457.6	-0.080907	0.038186	-2.11876	0.0341108	0.159093
ENSG00000112081.16	SRSF3	protein_coding	16123.3	0.0797963	0.0376673	2.11845	0.034137	0.159093
ENSG00000170412.16	GPRC5C	protein_coding	14882.6	-0.0821103	0.0387715	-2.1178	0.0341919	0.15925
ENSG00000140157.14	NIPA2	protein_coding	10140.1	0.0845403	0.0399399	2.11669	0.0342864	0.159491
ENSG00000174738.12	NR1D2	protein_coding	2895.98	0.14053	0.0663913	2.11669	0.0342862	0.159491
ENSG00000114354.13	TFG	protein_coding	9193.27	-0.0846573	0.0400139	-2.1157	0.0343708	0.159784
ENSG00000164068.15	RNF123	protein_coding	2264.41	-0.144474	0.0683302	-2.11435	0.0344856	0.160219
ENSG00000162433.14	AK4	protein_coding	12435.3	0.0781886	0.0369944	2.11353	0.0345558	0.160445
ENSG00000163636.10	PSMD6	protein_coding	3877.83	0.116714	0.0552303	2.11323	0.0345808	0.160462
ENSG00000235173.6	HGH1	protein_coding	5122.02	-0.128508	0.0608757	-2.11099	0.034773	0.161154
ENSG00000126458.3	RRAS	protein_coding	2176.47	-0.150176	0.0711401	-2.11099	0.034773	0.161154
ENSG00000130147.15	SH3BP4	protein_coding	2041.14	-0.151395	0.0717418	-2.11027	0.034835	0.161341
ENSG00000124198.8	ARFGEF2	protein_coding	11372.2	0.0827263	0.039218	2.1094	0.0349104	0.16158
ENSG00000185650.9	ZFP36L1	protein_coding	5575.34	-0.11091	0.0525847	-2.10917	0.0349297	0.16158
ENSG00000104635.13	SLC39A14	protein_coding	8474.06	0.0858245	0.0407159	2.10789	0.0350407	0.161993
ENSG00000165406.15	MARCH8	protein_coding	1893.36	-0.152815	0.0725294	-2.10694	0.0351229	0.162272
ENSG00000137563.11	GGH	protein_coding	2475.95	0.148432	0.0705143	2.105	0.0352916	0.16258
ENSG00000135506.15	OS9	protein_coding	8597	-0.0888327	0.0422024	-2.10492	0.0352981	0.16258
ENSG00000104388.14	RAB2A	protein_coding	2445.56	0.137273	0.065212	2.10503	0.0352885	0.16258
ENSG00000153993.13	SEMA3D	protein_coding	3414.68	0.131116	0.0622639	2.10582	0.0352201	0.16258
ENSG00000165156.14	ZHX1	protein_coding	4313.43	0.11356	0.0539452	2.1051	0.0352822	0.16258
ENSG00000112977.15	DAP	protein_coding	19181.2	-0.0760917	0.0361656	-2.10398	0.03538	0.162857
ENSG00000145431.10	PDGFC	protein_coding	1269.86	0.185576	0.0882314	2.10329	0.0354405	0.163035
ENSG00000197713.14	RPE	protein_coding	4241.63	0.119187	0.05668	2.1028	0.0354836	0.163133
ENSG00000008405.11	CRY1	protein_coding	2943.49	0.126127	0.059998	2.10218	0.0355371	0.163279
ENSG00000181588.16	MEX3D	protein_coding	1980.63	-0.169098	0.0804705	-2.10137	0.0356088	0.163507
ENSG00000110107.8	PRPF19	protein_coding	10363.2	-0.082516	0.0392728	-2.1011	0.0356322	0.163515
ENSG00000166295.8	ANAPC16	protein_coding	1480.99	0.175363	0.0834809	2.10064	0.035673	0.163601
ENSG00000166794.4	PPIB	protein_coding	14485.2	0.0790345	0.0376538	2.09898	0.0358189	0.164147
ENSG00000100462.15	PRMT5	protein_coding	8390.55	-0.0873008	0.0415959	-2.09879	0.0358358	0.164147
ENSG00000205581.10	HMGN1	protein_coding	17584.1	0.0702036	0.0334554	2.09842	0.0358678	0.164193
ENSG00000075188.8	NUP37	protein_coding	2659.13	0.131103	0.0624924	2.0979	0.0359141	0.164304
ENSG00000167863.11	ATP5H	protein_coding	6472.61	0.098276	0.046871	2.09673	0.0360171	0.164675
ENSG00000101220.17	C20orf27	protein_coding	6535.83	-0.109234	0.052131	-2.09538	0.0361373	0.164711
ENSG00000115816.14	CEBPZ	protein_coding	4566.49	0.124324	0.0593459	2.09491	0.0361792	0.164711
ENSG00000073111.13	MCM2	protein_coding	5422.92	-0.103543	0.0494205	-2.09515	0.0361575	0.164711
ENSG00000067177.14	PHKA1	protein_coding	5969.59	0.096235	0.0459372	2.09492	0.0361777	0.164711
ENSG00000259956.1	RBM15B	protein_coding	6252.95	-0.101131	0.0482454	-2.09618	0.036066	0.164711
ENSG00000126858.17	RHOT1	protein_coding	2399.84	0.141098	0.0673347	2.09547	0.0361296	0.164711
ENSG00000167543.15	TP53I13	protein_coding	1228.38	-0.195951	0.0935227	-2.09522	0.0361513	0.164711
ENSG00000061794.12	MRPS35	protein_coding	6017.77	0.100961	0.048215	2.09397	0.0362625	0.16499
ENSG00000072864.14	NDE1	protein_coding	1761.12	-0.156806	0.0748997	-2.09355	0.0363	0.16506
ENSG00000175727.13	MLXIP	protein_coding	4556.48	-0.105501	0.0504291	-2.09207	0.0364326	0.165462
ENSG00000078114.18	NEBL	protein_coding	1344.59	0.188552	0.0901241	2.09214	0.0364263	0.165462
ENSG00000198952.8	SMG5	protein_coding	9314.78	-0.08323	0.0397908	-2.09169	0.0364664	0.165515
ENSG00000114744.8	COMMD2	protein_coding	1434.44	0.171189	0.0818634	2.09115	0.0365149	0.165635
ENSG00000160813.6	PPP1R35	protein_coding	1228.55	-0.197145	0.0942902	-2.09083	0.036543	0.165662
ENSG00000136153.19	LMO7	protein_coding	9563.7	-0.085229	0.0407882	-2.08955	0.0366585	0.166085
ENSG00000168385.17	SEPT2	protein_coding	21731.4	0.0679378	0.0325323	2.08832	0.0367691	0.166485
ENSG00000181610.12	MRPS23	protein_coding	5094.54	0.102585	0.0491377	2.0877	0.036825	0.166536
ENSG00000132819.16	RBM38	protein_coding	2359.6	-0.140059	0.0670838	-2.08782	0.036814	0.166536
ENSG00000099337.4	KCNK6	protein_coding	1520.9	-0.167218	0.0801362	-2.08667	0.0369177	0.166754
ENSG00000263465.4	SRSF8	protein_coding	2367.39	0.137769	0.0660233	2.08668	0.0369174	0.166754
ENSG00000125733.17	TRIP10	protein_coding	4651.59	-0.10487	0.0502632	-2.08641	0.0369417	0.166761
ENSG00000189043.9	NDUFA4	protein_coding	7354.85	0.0967341	0.046382	2.0856	0.037015	0.166992
ENSG00000081692.12	JMJD4	protein_coding	2411.99	-0.137625	0.0660117	-2.08485	0.0370827	0.167196
ENSG00000143401.14	ANP32E	protein_coding	5449.42	0.101801	0.0488413	2.08433	0.0371299	0.167208
ENSG00000188725.7	SMIM15	protein_coding	3984.48	0.110955	0.0532277	2.08453	0.037112	0.167208
ENSG00000168061.14	SAC3D1	protein_coding	1585.28	-0.165909	0.079635	-2.08337	0.0372179	0.167503
ENSG00000147804.9	SLC39A4	protein_coding	1906.48	-0.15551	0.0746601	-2.08291	0.0372593	0.167588
ENSG00000163362.10	C1orf106	protein_coding	3368.22	-0.120492	0.0578683	-2.08218	0.0373264	0.167776
ENSG00000173264.14	GPR137	protein_coding	2159.08	-0.147431	0.070822	-2.08172	0.0373682	0.167776
ENSG00000160695.14	VPS11	protein_coding	2859.91	-0.127781	0.0613823	-2.08173	0.0373672	0.167776
ENSG00000143842.14	SOX13	protein_coding	1824.68	-0.156796	0.0753502	-2.08089	0.0374436	0.168013
ENSG00000234851.4	RP11-3P17.3	processed_pseudogene	2291.52	-0.172529	0.0829333	-2.08033	0.0374951	0.168144
ENSG00000068001.13	HYAL2	protein_coding	2501.91	-0.137063	0.065913	-2.07945	0.0375762	0.168267
ENSG00000102893.15	PHKB	protein_coding	3500.92	0.116722	0.0561372	2.07923	0.0375966	0.168267
ENSG00000170089.15	RP11-423H2.1	transcribed_unprocessed_pseudogene	4451.58	0.107968	0.0519206	2.07948	0.0375731	0.168267
ENSG00000225484.6	RP11-773D16.1	antisense	1634.21	-0.17221	0.0828313	-2.07905	0.0376126	0.168267
ENSG00000163728.10	TTC14	protein_coding	2863.73	0.13023	0.0626532	2.07859	0.0376547	0.168355
ENSG00000055483.19	USP36	protein_coding	5169.92	-0.103824	0.0499593	-2.07817	0.0376932	0.168426
ENSG00000137642.12	SORL1	protein_coding	2189.19	-0.143866	0.0693556	-2.07432	0.0380495	0.169822
ENSG00000126062.3	TMEM115	protein_coding	3052.81	-0.134703	0.0649436	-2.07415	0.0380654	0.169822
ENSG00000151135.9	TMEM263	protein_coding	5075.6	0.103699	0.0499979	2.07406	0.0380736	0.169822
ENSG00000198053.11	SIRPA	protein_coding	4380.09	-0.10602	0.0511311	-2.0735	0.038126	0.169954
ENSG00000103160.11	HSDL1	protein_coding	1651.29	0.160216	0.0772817	2.07314	0.0381591	0.17
ENSG00000178927.17	C17orf62	protein_coding	3193.52	-0.124006	0.0598229	-2.07289	0.0381828	0.170005
ENSG00000175573.6	C11orf68	protein_coding	5652.98	-0.10633	0.0513215	-2.07185	0.0382794	0.170289
ENSG00000149798.4	CDC42EP2	protein_coding	2857.72	-0.132302	0.0638611	-2.07171	0.0382923	0.170289
ENSG00000102471.13	NDFIP2	protein_coding	2283.87	0.139393	0.0673176	2.07067	0.0383895	0.17062
ENSG00000165527.6	ARF6	protein_coding	11649.8	0.0784399	0.0378946	2.06995	0.0384571	0.17067
ENSG00000135390.17	ATP5G2	protein_coding	3261.42	-0.123025	0.0594376	-2.06982	0.0384693	0.17067
ENSG00000104756.15	KCTD9	protein_coding	2258.32	0.138883	0.0670882	2.07016	0.0384374	0.17067
ENSG00000254858.9	MPV17L2	protein_coding	1452.52	-0.168126	0.0812832	-2.0684	0.0386028	0.171161
ENSG00000110328.5	GALNT18	protein_coding	1366.92	-0.190063	0.0919002	-2.06814	0.0386266	0.171165
ENSG00000172062.16	SMN1	protein_coding	2763.06	0.135338	0.0654547	2.06766	0.038672	0.171265
ENSG00000131871.14	VIMP	protein_coding	2264.31	0.144572	0.0699411	2.06705	0.0387295	0.171418
ENSG00000115738.9	ID2	protein_coding	1528.42	0.165075	0.0798796	2.06655	0.0387764	0.171429
ENSG00000123836.14	PFKFB2	protein_coding	3596.07	0.117938	0.0570722	2.06647	0.038784	0.171429
ENSG00000167182.14	SP2	protein_coding	1576.33	-0.162262	0.078528	-2.06629	0.0388007	0.171429
ENSG00000094880.10	CDC23	protein_coding	2817.19	0.129437	0.0626621	2.06564	0.0388628	0.17155
ENSG00000170802.15	FOXN2	protein_coding	1409.35	0.171331	0.0829484	2.06552	0.038874	0.17155
ENSG00000154114.12	TBCEL	protein_coding	1367.02	0.176184	0.0853076	2.06528	0.0388969	0.17155
ENSG00000130826.17	DKC1	protein_coding	14730.4	0.0761938	0.0369015	2.06479	0.0389431	0.171652
ENSG00000170540.14	ARL6IP1	protein_coding	8559.95	0.0846277	0.041009	2.06363	0.0390524	0.172033
ENSG00000130313.6	PGLS	protein_coding	2816.3	-0.126408	0.0612651	-2.0633	0.0390845	0.172073
ENSG00000174744.13	BRMS1	protein_coding	3776.25	-0.122646	0.0594776	-2.06205	0.0392025	0.172226
ENSG00000181904.8	C5orf24	protein_coding	3709.6	0.117525	0.0570036	2.06172	0.0392343	0.172226
ENSG00000086061.15	DNAJA1	protein_coding	11733.5	0.0948417	0.0459974	2.06189	0.039218	0.172226
ENSG00000106803.9	SEC61B	protein_coding	2040.74	0.145312	0.0704674	2.06212	0.0391965	0.172226
ENSG00000106028.10	SSBP1	protein_coding	6247.16	0.100684	0.0488282	2.06199	0.0392084	0.172226
ENSG00000160710.15	ADAR	protein_coding	15920.4	-0.0740938	0.0359589	-2.06051	0.0393494	0.17263
ENSG00000105339.10	DENND3	protein_coding	3175.63	-0.122728	0.0595821	-2.05981	0.0394165	0.172823
ENSG00000132694.18	ARHGEF11	protein_coding	2846.04	-0.128669	0.0625253	-2.05787	0.039603	0.173284
ENSG00000167861.15	HID1	protein_coding	1217.13	-0.191001	0.0927876	-2.05847	0.039545	0.173284
ENSG00000140990.14	NDUFB10	protein_coding	4468.39	-0.110772	0.0538379	-2.05751	0.0396376	0.173284
ENSG00000100614.17	PPM1A	protein_coding	5415.79	0.103578	0.0503393	2.05759	0.0396299	0.173284
ENSG00000153250.19	RBMS1	protein_coding	4184.51	0.108288	0.0526255	2.05771	0.0396179	0.173284
ENSG00000079459.12	FDFT1	protein_coding	1319.23	0.17487	0.085009	2.05707	0.0396792	0.173341
ENSG00000112245.10	PTP4A1	protein_coding	8645.41	0.0881981	0.0428794	2.05689	0.0396969	0.173341
ENSG00000196588.15	MKL1	protein_coding	1393.57	-0.173586	0.0844245	-2.0561	0.0397725	0.173569
ENSG00000144320.13	KIAA1715	protein_coding	3675.39	0.118971	0.0578897	2.05512	0.0398671	0.173881
ENSG00000108950.11	FAM20A	protein_coding	2319.51	-0.141403	0.0688407	-2.05406	0.0399699	0.174228
ENSG00000132471.11	WBP2	protein_coding	3621.45	-0.114187	0.0556054	-2.05353	0.0400217	0.174352
ENSG00000105701.15	FKBP8	protein_coding	11582.7	-0.0947674	0.0461605	-2.053	0.0400728	0.174473
ENSG00000175662.17	TOM1L2	protein_coding	2295.43	-0.138071	0.0672739	-2.05236	0.0401342	0.174639
ENSG00000120686.11	UFM1	protein_coding	3371.85	0.116191	0.0566348	2.05159	0.0402094	0.174864
ENSG00000121579.12	NAA50	protein_coding	21686.1	0.0692223	0.0337533	2.05083	0.0402836	0.175085
ENSG00000134247.9	PTGFRN	protein_coding	2367.55	0.136811	0.0667223	2.05045	0.0403202	0.175142
ENSG00000009844.15	VTA1	protein_coding	3275.98	0.120678	0.0588635	2.05013	0.0403513	0.175176
ENSG00000148154.9	UGCG	protein_coding	1359.38	0.175294	0.0855321	2.04946	0.0404176	0.175362
ENSG00000113356.11	POLR3G	protein_coding	5924.68	0.10205	0.0498057	2.04895	0.0404666	0.175473
ENSG00000066117.14	SMARCD1	protein_coding	5099.87	-0.100537	0.0490847	-2.04824	0.0405368	0.175675
ENSG00000165886.4	UBTD1	protein_coding	2386.1	-0.161998	0.0791097	-2.04777	0.0405826	0.175772
ENSG00000141644.17	MBD1	protein_coding	2028.33	-0.145225	0.0709356	-2.04727	0.0406311	0.17588
ENSG00000137414.5	FAM8A1	protein_coding	1873.98	0.159436	0.0779031	2.0466	0.0406976	0.175992
ENSG00000276045.3	ORAI1	protein_coding	2376.91	-0.140065	0.0684403	-2.04653	0.040704	0.175992
ENSG00000143850.14	PLEKHA6	protein_coding	1271.81	-0.177496	0.0867993	-2.04491	0.0408641	0.176582
ENSG00000177283.7	FZD8	protein_coding	22705.3	-0.0837169	0.0409549	-2.04413	0.040941	0.176788
ENSG00000106266.10	SNX8	protein_coding	2510.67	-0.132377	0.0647654	-2.04394	0.040959	0.176788
ENSG00000175166.16	PSMD2	protein_coding	36873	-0.0664631	0.0325249	-2.04345	0.0410078	0.176897
ENSG00000147416.10	ATP6V1B2	protein_coding	3110.67	0.122397	0.0599428	2.04189	0.0411621	0.177358
ENSG00000205208.4	C4orf46	protein_coding	1383.7	0.180267	0.0883254	2.04094	0.0412571	0.177358
ENSG00000070404.9	FSTL3	protein_coding	2231.32	-0.138577	0.0678871	-2.04128	0.0412231	0.177358
ENSG00000101577.9	LPIN2	protein_coding	10004.3	0.0830096	0.0406613	2.04149	0.041202	0.177358
ENSG00000156642.16	NPTN	protein_coding	5335.65	0.0971704	0.0476012	2.04134	0.0412168	0.177358
ENSG00000197170.9	PSMD12	protein_coding	9566.14	0.0851335	0.0417117	2.041	0.0412508	0.177358
ENSG00000228300.13	C19orf24	protein_coding	1734.56	-0.170181	0.0834004	-2.04053	0.0412978	0.177431
ENSG00000182934.11	SRPRA	protein_coding	17297.5	-0.0684646	0.033573	-2.03928	0.0414226	0.177865
ENSG00000140525.17	FANCI	protein_coding	6434.13	0.091707	0.0449844	2.03864	0.0414859	0.178035
ENSG00000025796.13	SEC63	protein_coding	5853.54	0.0988503	0.0484997	2.03816	0.0415335	0.178137
ENSG00000020577.13	SAMD4A	protein_coding	3101.9	-0.124235	0.0609646	-2.03783	0.0415674	0.17818
ENSG00000131788.15	PIAS3	protein_coding	2880.12	-0.1255	0.0616307	-2.03633	0.0417174	0.17872
ENSG00000138073.13	PREB	protein_coding	4271.74	-0.107451	0.0527995	-2.03507	0.041844	0.17916
ENSG00000096746.17	HNRNPH3	protein_coding	8689.22	0.0910668	0.04476	2.03456	0.0418953	0.179277
ENSG00000123374.10	CDK2	protein_coding	2797.98	-0.129584	0.0637023	-2.03421	0.0419304	0.179314
ENSG00000101439.8	CST3	protein_coding	6429.25	-0.0962204	0.0473061	-2.034	0.0419519	0.179314
ENSG00000139154.14	AEBP2	protein_coding	1237.59	0.182159	0.0895724	2.03365	0.0419864	0.179359
ENSG00000179832.17	MROH1	protein_coding	1725.15	-0.155475	0.0764614	-2.03338	0.0420141	0.179375
ENSG00000147676.13	MAL2	protein_coding	50750.2	0.0653274	0.0321358	2.03285	0.0420672	0.179499
ENSG00000144034.14	TPRKB	protein_coding	1495.83	0.16604	0.0817512	2.03104	0.0422507	0.18018
ENSG00000162545.5	CAMK2N1	protein_coding	1380.49	0.182679	0.0899613	2.03064	0.0422915	0.180251
ENSG00000180628.14	PCGF5	protein_coding	2755.4	0.13202	0.0650299	2.03015	0.0423415	0.180277
ENSG00000143569.18	UBAP2L	protein_coding	10377.8	-0.0841992	0.0414753	-2.03011	0.0423458	0.180277
ENSG00000125449.6	ARMC7	protein_coding	1545.14	-0.162509	0.0800911	-2.02906	0.0424527	0.180467
ENSG00000135404.11	CD63	protein_coding	17083.6	-0.079868	0.0393684	-2.02873	0.0424853	0.180467
ENSG00000113594.9	LIFR	protein_coding	5425.87	0.109482	0.0539684	2.02863	0.0424964	0.180467
ENSG00000103148.15	NPRL3	protein_coding	2281.65	-0.13556	0.0668437	-2.02801	0.0425593	0.180467
ENSG00000068654.15	POLR1A	protein_coding	8434.71	-0.0826306	0.0407233	-2.02907	0.042451	0.180467
ENSG00000143252.14	SDHC	protein_coding	7252.56	0.0900762	0.0444136	2.02812	0.0425478	0.180467
ENSG00000104897.9	SF3A2	protein_coding	2409.2	-0.131823	0.064993	-2.02826	0.0425334	0.180467
ENSG00000267303.1	CTD-2369P2.12	protein_coding	1424.78	-0.18826	0.0928535	-2.02749	0.0426124	0.18055
ENSG00000111331.12	OAS3	protein_coding	6547.86	-0.0949353	0.0468274	-2.02734	0.0426272	0.18055
ENSG00000085978.21	ATG16L1	protein_coding	2879.49	-0.12369	0.0610216	-2.02698	0.042664	0.180604
ENSG00000139496.15	NUP58	protein_coding	5391.45	0.101632	0.050149	2.02661	0.0427027	0.180665
ENSG00000162368.13	CMPK1	protein_coding	9212.09	0.0811811	0.0400682	2.02607	0.0427575	0.180748
ENSG00000130165.10	ELOF1	protein_coding	3550.74	-0.122751	0.0605896	-2.02594	0.0427705	0.180748
ENSG00000196365.11	LONP1	protein_coding	17356.8	-0.0766492	0.0378451	-2.02534	0.0428324	0.180805
ENSG00000169251.12	NMD3	protein_coding	7128.26	0.0959035	0.0473466	2.02556	0.0428097	0.180805
ENSG00000170558.8	CDH2	protein_coding	6132.18	-0.0958121	0.0473211	-2.02472	0.0428959	0.180971
ENSG00000134375.10	TIMM17A	protein_coding	2735.19	0.131006	0.0647979	2.02177	0.0432	0.182151
ENSG00000135631.16	RAB11FIP5	protein_coding	3502.69	-0.114558	0.0566812	-2.02109	0.0432708	0.182347
ENSG00000162623.15	TYW3	protein_coding	2443.38	0.131979	0.0653221	2.02043	0.0433383	0.182529
ENSG00000067208.14	EVI5	protein_coding	1441.08	0.171166	0.0847521	2.01961	0.0434236	0.182593
ENSG00000113645.14	WWC1	protein_coding	1420.32	-0.168412	0.0833898	-2.01958	0.0434269	0.182593
ENSG00000088930.7	XRN2	protein_coding	10513.2	0.0783321	0.0387825	2.01978	0.0434062	0.182593
ENSG00000071054.16	MAP4K4	protein_coding	26811.6	0.0641677	0.0317869	2.01869	0.0435199	0.18278
ENSG00000198420.9	TCAF1	protein_coding	5023.23	0.104275	0.0516551	2.01868	0.0435201	0.18278
ENSG00000143740.14	SNAP47	protein_coding	3700.54	-0.11259	0.0557873	-2.0182	0.0435702	0.182887
ENSG00000139684.13	ESD	protein_coding	3538.2	0.112347	0.0557042	2.01686	0.0437105	0.183373
ENSG00000087460.24	GNAS	protein_coding	51666.8	-0.0594381	0.0294841	-2.01594	0.0438063	0.183672
ENSG00000135821.18	GLUL	protein_coding	12401.6	0.0752628	0.0373431	2.01544	0.0438584	0.183788
ENSG00000103932.11	RPAP1	protein_coding	2981.2	-0.121241	0.0601673	-2.01507	0.0438973	0.183848
ENSG00000013441.15	CLK1	protein_coding	2300.65	0.145977	0.0724705	2.01429	0.0439792	0.183896
ENSG00000089280.18	FUS	protein_coding	24592.4	0.0716688	0.0355902	2.01372	0.0440389	0.183896
ENSG00000160299.16	PCNT	protein_coding	5170.86	-0.101679	0.0505042	-2.01328	0.0440853	0.183896
ENSG00000163162.8	RNF149	protein_coding	2486.69	0.129279	0.0641681	2.0147	0.0439362	0.183896
ENSG00000160214.12	RRP1	protein_coding	4526	-0.110749	0.0550147	-2.01309	0.0441055	0.183896
ENSG00000155957.17	TMBIM4	protein_coding	1350.42	0.175416	0.0870925	2.01414	0.0439953	0.183896
ENSG00000172315.5	TP53RK	protein_coding	3023	0.119757	0.0594873	2.01315	0.0440987	0.183896
ENSG00000130529.15	TRPM4	protein_coding	2364.01	-0.137136	0.0681102	-2.01345	0.0440678	0.183896
ENSG00000163374.19	YY1AP1	protein_coding	3202.67	-0.118042	0.0586472	-2.01274	0.0441419	0.183945
ENSG00000130731.15	C16orf13	protein_coding	1650.25	-0.163455	0.0812379	-2.01206	0.044214	0.184143
ENSG00000204580.13	DDR1	protein_coding	5004.82	-0.102576	0.0510041	-2.01114	0.0443109	0.184388
ENSG00000180182.10	MED14	protein_coding	5267.07	-0.109502	0.0544505	-2.01103	0.0443221	0.184388
ENSG00000104885.17	DOT1L	protein_coding	2948.54	-0.125462	0.0624134	-2.01017	0.0444129	0.184663
ENSG00000080819.6	CPOX	protein_coding	4174.1	0.106395	0.0529508	2.00932	0.0445027	0.184728
ENSG00000174996.11	KLC2	protein_coding	4851.88	-0.118265	0.0588474	-2.00969	0.0444642	0.184728
ENSG00000112759.17	SLC29A1	protein_coding	5408.61	-0.0952209	0.0473848	-2.00953	0.0444814	0.184728
ENSG00000148700.14	ADD3	protein_coding	2282.61	0.136093	0.0677513	2.00871	0.0445676	0.184895
ENSG00000112062.10	MAPK14	protein_coding	4507.04	0.101569	0.0505735	2.00834	0.0446075	0.184958
ENSG00000076108.11	BAZ2A	protein_coding	5783.05	-0.0975454	0.0485959	-2.00727	0.0447204	0.185209
ENSG00000113013.12	HSPA9	protein_coding	34768.2	0.0632964	0.03153	2.0075	0.0446964	0.185209
ENSG00000186185.13	KIF18B	protein_coding	3142.31	-0.121794	0.0606826	-2.00707	0.0447423	0.185209
ENSG00000134827.7	TCN1	protein_coding	1599.43	0.162379	0.0809468	2.006	0.0448566	0.185579
ENSG00000183889.12	AC138969.4	protein_coding	1921.04	-0.173601	0.086572	-2.00528	0.0449328	0.185591
ENSG00000136877.14	FPGS	protein_coding	2278.38	-0.138773	0.0691908	-2.00565	0.0448935	0.185591
ENSG00000113558.18	SKP1	protein_coding	10123	0.0772043	0.0385007	2.00527	0.044934	0.185591
ENSG00000111252.10	SH2B3	protein_coding	4865.27	-0.109678	0.0547014	-2.00503	0.0449598	0.185596
ENSG00000140307.10	GTF2A2	protein_coding	2475.79	0.129339	0.0645411	2.00399	0.0450716	0.185955
ENSG00000166847.9	DCTN5	protein_coding	5283.54	0.0958214	0.0478252	2.00358	0.0451155	0.186033
ENSG00000168542.14	COL3A1	protein_coding	1420.99	-0.164313	0.0820293	-2.0031	0.045167	0.186143
ENSG00000113583.7	C5orf15	protein_coding	3123.84	0.123305	0.0615944	2.00189	0.0452967	0.186267
ENSG00000111799.20	COL12A1	protein_coding	3044.57	-0.135842	0.067841	-2.00235	0.0452467	0.186267
ENSG00000099821.13	POLRMT	protein_coding	4573.79	-0.119895	0.0598809	-2.00223	0.0452597	0.186267
ENSG00000069329.16	VPS35	protein_coding	8027.85	0.0942017	0.0470511	2.00211	0.0452725	0.186267
ENSG00000147274.14	RBMX	protein_coding	15949.4	0.0691914	0.0345733	2.0013	0.0453604	0.186324
ENSG00000004700.15	RECQL	protein_coding	3282.8	0.12098	0.0604466	2.00144	0.0453449	0.186324
ENSG00000164022.16	AIMP1	protein_coding	1685.64	0.157159	0.0785794	2	0.0455003	0.186498
ENSG00000099977.13	DDT	protein_coding	1838.02	-0.147033	0.0734968	-2.00053	0.0454429	0.186498
ENSG00000108984.14	MAP2K6	protein_coding	1411.58	0.16621	0.0830999	2.00012	0.0454868	0.186498
ENSG00000123240.16	OPTN	protein_coding	1434.97	-0.169804	0.084903	-1.99998	0.0455025	0.186498
ENSG00000074657.13	ZNF532	protein_coding	4342.04	-0.105856	0.052947	-1.99928	0.045578	0.186705
ENSG00000105971.14	CAV2	protein_coding	2971.59	-0.119125	0.0596196	-1.99809	0.0457069	0.186943
ENSG00000051128.18	HOMER3	protein_coding	2408.63	-0.136542	0.0683453	-1.99783	0.0457354	0.186943
ENSG00000197256.10	KANK2	protein_coding	7151.59	-0.0872231	0.0436591	-1.99782	0.0457362	0.186943
ENSG00000157881.13	PANK4	protein_coding	2743.53	-0.127473	0.0637872	-1.99842	0.0456716	0.186943
ENSG00000166507.17	NDST2	protein_coding	3188.19	-0.116292	0.0582206	-1.99743	0.0457786	0.187015
ENSG00000169018.5	FEM1B	protein_coding	2693.74	0.127287	0.0637494	1.99668	0.0458599	0.187245
ENSG00000174013.7	FBXO45	protein_coding	4130.13	0.111441	0.0558289	1.99612	0.0459214	0.187393
ENSG00000226479.3	TMEM185B	protein_coding	2655.4	-0.126762	0.0635596	-1.99438	0.0461104	0.188062
ENSG00000169683.7	LRRC45	protein_coding	2422.63	-0.143853	0.0721849	-1.99285	0.0462782	0.188644
ENSG00000137509.10	PRCP	protein_coding	7111.26	0.0859033	0.0431275	1.99184	0.0463881	0.188988
ENSG00000160014.16	CALM3	protein_coding	9094.94	-0.0807259	0.0405531	-1.99062	0.0465226	0.189433
ENSG00000145604.15	SKP2	protein_coding	4101.84	0.105312	0.0529489	1.98894	0.0467083	0.190086
ENSG00000065833.8	ME1	protein_coding	5884.1	0.0952653	0.0479146	1.98823	0.0467862	0.1903
ENSG00000116754.13	SRSF11	protein_coding	6879.96	0.0876976	0.044143	1.98667	0.0469592	0.190899
ENSG00000120256.9	LRP11	protein_coding	2952.1	0.120126	0.0604884	1.98593	0.0470412	0.191129
ENSG00000198954.7	KIF1BP	protein_coding	3444.18	-0.113023	0.0569336	-1.98517	0.047126	0.191369
ENSG00000156875.13	MFSD14A	protein_coding	2840.41	0.120627	0.0607779	1.98471	0.0471768	0.191472
ENSG00000155545.19	MIER3	protein_coding	1336.72	0.169144	0.0852487	1.98412	0.0472425	0.191542
ENSG00000249992.1	TMEM158	protein_coding	7607.86	-0.0942677	0.0475117	-1.98409	0.0472454	0.191542
ENSG00000126522.16	ASL	protein_coding	1256.11	-0.178228	0.0899239	-1.98199	0.0474805	0.191561
ENSG00000127334.10	DYRK2	protein_coding	1496.89	0.160545	0.0809841	1.98243	0.0474315	0.191561
ENSG00000159110.19	IFNAR2	protein_coding	1650.48	0.160129	0.0807575	1.98283	0.047386	0.191561
ENSG00000090530.9	P3H2	protein_coding	1880.32	-0.149748	0.0755415	-1.98233	0.0474423	0.191561
ENSG00000169733.11	RFNG	protein_coding	1991.59	-0.146586	0.0739107	-1.98329	0.0473349	0.191561
ENSG00000141858.11	SAMD1	protein_coding	3574.01	-0.113567	0.0572637	-1.98322	0.0473429	0.191561
ENSG00000138385.15	SSB	protein_coding	8397.96	0.0996544	0.0502575	1.98288	0.0473813	0.191561
ENSG00000154370.15	TRIM11	protein_coding	2030.73	-0.144266	0.0727805	-1.9822	0.0474565	0.191561
ENSG00000196715.5	VKORC1L1	protein_coding	6232.6	0.09161	0.0461851	1.98354	0.047307	0.191561
ENSG00000143486.15	EIF2D	protein_coding	3298.83	-0.113183	0.0571213	-1.98145	0.0475407	0.1917
ENSG00000116704.7	SLC35D1	protein_coding	1293.97	0.177583	0.0896391	1.98109	0.0475808	0.191759
ENSG00000241399.6	CD302	protein_coding	1405.1	0.1694	0.0855592	1.97991	0.0477136	0.191777
ENSG00000175832.12	ETV4	protein_coding	7652.51	-0.084893	0.042872	-1.98015	0.0476866	0.191777
ENSG00000182325.10	FBXL6	protein_coding	2409.86	-0.144427	0.0729186	-1.98066	0.0476297	0.191777
ENSG00000111231.8	GPN3	protein_coding	2143.7	0.136379	0.0688803	1.97994	0.0477103	0.191777
ENSG00000137710.15	RDX	protein_coding	13335.9	0.0726486	0.0366823	1.98048	0.0476494	0.191777
ENSG00000149260.15	CAPN5	protein_coding	1861.01	-0.144764	0.0731521	-1.97895	0.0478217	0.191895
ENSG00000136448.11	NMT1	protein_coding	11081.5	-0.0759024	0.0383634	-1.97851	0.0478712	0.191895
ENSG00000160691.18	SHC1	protein_coding	6973.96	-0.0875627	0.0442405	-1.97924	0.0477884	0.191895
ENSG00000138375.12	SMARCAL1	protein_coding	1378.59	-0.168245	0.0850306	-1.97864	0.0478564	0.191895
ENSG00000160131.13	VMA21	protein_coding	4942.6	0.123097	0.0622118	1.97867	0.0478532	0.191895
ENSG00000253719.3	ATXN7L3B	protein_coding	4613.54	0.102132	0.0516281	1.97822	0.0479043	0.191925
ENSG00000156508.17	EEF1A1	protein_coding	355745	0.0608866	0.0307903	1.97746	0.0479894	0.191958
ENSG00000112855.15	HARS2	protein_coding	2294.4	0.133523	0.0675161	1.97765	0.0479679	0.191958
ENSG00000106591.3	MRPL32	protein_coding	2722.49	0.122914	0.0621452	1.97785	0.0479451	0.191958
ENSG00000113658.17	SMAD5	protein_coding	4526.21	0.103813	0.0525064	1.97714	0.0480259	0.192001
ENSG00000123992.19	DNPEP	protein_coding	2914.41	-0.124376	0.0629543	-1.97566	0.0481933	0.192567
ENSG00000104964.14	AES	protein_coding	13680.9	-0.0772241	0.03912	-1.97403	0.0483781	0.192894
ENSG00000100558.8	PLEK2	protein_coding	1901.67	-0.143148	0.0725096	-1.97419	0.04836	0.192894
ENSG00000181523.12	SGSH	protein_coding	3155.82	-0.119288	0.0604203	-1.97431	0.0483466	0.192894
ENSG00000011260.13	UTP18	protein_coding	5140.92	0.0979841	0.0496302	1.97428	0.0483494	0.192894
ENSG00000234857.2	HNRNPUL2-BSCL2	protein_coding	6470.36	-0.0901187	0.0456936	-1.97224	0.0485823	0.193604
ENSG00000119801.12	YPEL5	protein_coding	1489.46	0.159747	0.0810455	1.97108	0.0487149	0.19403
ENSG00000182831.11	C16orf72	protein_coding	3703.96	0.110436	0.0560495	1.97034	0.0487998	0.194264
ENSG00000125651.13	GTF2F1	protein_coding	10085.3	-0.0812384	0.0412444	-1.96968	0.0488748	0.194459
ENSG00000102034.16	ELF4	protein_coding	4013.07	-0.104346	0.0529911	-1.96913	0.0489384	0.194609
ENSG00000006576.16	PHTF2	protein_coding	5182.54	0.106023	0.0538596	1.96851	0.0490095	0.194788
ENSG00000169692.12	AGPAT2	protein_coding	3121.22	-0.135551	0.0689085	-1.96711	0.04917	0.195218
ENSG00000130811.11	EIF3G	protein_coding	12799.4	-0.0798023	0.0405666	-1.96719	0.0491612	0.195218
ENSG00000111077.17	TNS2	protein_coding	1518.93	-0.160537	0.0816388	-1.96643	0.0492491	0.195398
ENSG00000136051.14	WASHC4	protein_coding	3615.08	0.124762	0.0634511	1.96627	0.0492674	0.195398
ENSG00000171522.5	PTGER4	protein_coding	1385.57	0.163752	0.0833426	1.96481	0.0494367	0.195965
ENSG00000128342.4	LIF	protein_coding	4912.48	-0.104379	0.0532084	-1.96169	0.0497982	0.197189
ENSG00000079313.14	REXO1	protein_coding	2395.36	-0.12878	0.0656408	-1.9619	0.0497747	0.197189
ENSG00000187244.11	BCAM	protein_coding	2233.56	-0.133117	0.0678996	-1.96049	0.0499384	0.197327
ENSG00000129559.12	NEDD8	protein_coding	5586.62	0.096877	0.0494091	1.96071	0.0499127	0.197327
ENSG00000172830.12	SSH3	protein_coding	2440.48	-0.12997	0.0662851	-1.96077	0.0499053	0.197327
ENSG00000108312.14	UBTF	protein_coding	12789.9	-0.0728719	0.0371624	-1.9609	0.0498904	0.197327
ENSG00000167965.17	MLST8	protein_coding	2646.44	-0.125269	0.0639311	-1.95944	0.0500613	0.197604
ENSG00000086598.10	TMED2	protein_coding	15572.9	0.0725686	0.0370354	1.95944	0.0500614	0.197604
ENSG00000085998.13	POMGNT1	protein_coding	6365.46	-0.089833	0.0459061	-1.95689	0.0503607	0.19868
ENSG00000100065.14	CARD10	protein_coding	1308.21	-0.170513	0.0871542	-1.95646	0.0504113	0.198775
ENSG00000101003.9	GINS1	protein_coding	2814.74	0.12611	0.064492	1.95543	0.0505326	0.199148
ENSG00000105856.13	HBP1	protein_coding	1462.69	0.166645	0.0852827	1.95403	0.0506976	0.199694
ENSG00000156535.13	CD109	protein_coding	7482.39	0.086923	0.0444961	1.9535	0.0507604	0.199822
ENSG00000100364.18	KIAA0930	protein_coding	4083.96	-0.107551	0.0550608	-1.9533	0.0507837	0.199822
ENSG00000158467.16	AHCYL2	protein_coding	2422.16	0.132011	0.0676081	1.9526	0.0508674	0.200046
ENSG00000073008.14	PVR	protein_coding	3241.15	-0.117623	0.0602469	-1.95235	0.050897	0.200058
ENSG00000147799.11	ARHGAP39	protein_coding	1811.06	-0.145899	0.0747892	-1.9508	0.051081	0.200574
ENSG00000162521.18	RBBP4	protein_coding	10612.2	0.0761794	0.0390505	1.95079	0.051082	0.200574
ENSG00000234741.7	GAS5	processed_transcript	2009.62	0.137896	0.0707602	1.94878	0.0513218	0.201274
ENSG00000149084.12	HSD17B12	protein_coding	7099.24	0.088983	0.0456619	1.94874	0.0513269	0.201274
ENSG00000160584.15	SIK3	protein_coding	2425.63	-0.130661	0.0670533	-1.94862	0.051341	0.201274
ENSG00000117408.10	IPO13	protein_coding	2566.4	-0.123917	0.0636002	-1.94837	0.0513704	0.201284
ENSG00000174032.16	SLC25A30	protein_coding	1857.25	0.145242	0.0746088	1.94672	0.0515686	0.201955
ENSG00000166136.15	NDUFB8	protein_coding	4989.46	0.0987036	0.0507103	1.94642	0.0516042	0.201988
ENSG00000215252.11	GOLGA8B	protein_coding	3380.64	0.139977	0.0719604	1.9452	0.0517507	0.202455
ENSG00000115091.11	ACTR3	protein_coding	15366.4	0.0711952	0.0366222	1.94404	0.0518902	0.202895
ENSG00000130741.10	EIF2S3	protein_coding	21635.7	0.0725743	0.0373733	1.94188	0.0521522	0.203813
ENSG00000143776.18	CDC42BPA	protein_coding	7611.4	-0.0990492	0.0510259	-1.94116	0.0522393	0.203968
ENSG00000167693.16	NXN	protein_coding	2000.26	-0.138094	0.0711424	-1.9411	0.0522463	0.203968
ENSG00000172954.13	LCLAT1	protein_coding	2894.29	0.121211	0.0624845	1.93985	0.0523979	0.204453
ENSG00000092621.12	PHGDH	protein_coding	10278.4	0.0801923	0.041367	1.93856	0.0525552	0.20496
ENSG00000183098.10	GPC6	protein_coding	1343.62	0.165047	0.0851648	1.93797	0.0526265	0.205024
ENSG00000100300.17	TSPO	protein_coding	3341.47	-0.136298	0.0703278	-1.93804	0.0526181	0.205024
ENSG00000136279.20	DBNL	protein_coding	7076.6	-0.0838067	0.0432549	-1.93751	0.0526834	0.205139
ENSG00000152558.14	TMEM123	protein_coding	19599.2	0.0694027	0.0358536	1.93573	0.0529012	0.20588
ENSG00000004864.13	SLC25A13	protein_coding	3299.12	0.111704	0.0577135	1.93549	0.0529301	0.205885
ENSG00000170017.12	ALCAM	protein_coding	14194.1	-0.0809328	0.0418318	-1.93472	0.0530247	0.206022
ENSG00000171824.13	EXOSC10	protein_coding	5173.01	-0.0946571	0.0489337	-1.9344	0.0530643	0.206022
ENSG00000101216.10	GMEB2	protein_coding	1226.92	-0.170371	0.0880823	-1.93423	0.0530852	0.206022
ENSG00000115806.12	GORASP2	protein_coding	6831.43	-0.0865893	0.0447792	-1.9337	0.0531504	0.206022
ENSG00000101856.9	PGRMC1	protein_coding	9607.07	0.0761098	0.039336	1.93487	0.0530068	0.206022
ENSG00000172296.12	SPTLC3	protein_coding	3915.61	-0.106852	0.0552597	-1.93363	0.053158	0.206022
ENSG00000160803.7	UBQLN4	protein_coding	5154.27	-0.0946136	0.0489298	-1.93366	0.0531547	0.206022
ENSG00000203879.11	GDI1	protein_coding	6292.78	-0.0920822	0.0476318	-1.93321	0.0532106	0.206119
ENSG00000013561.17	RNF14	protein_coding	2880.56	0.119586	0.0618922	1.93217	0.053339	0.206509
ENSG00000141873.10	SLC39A3	protein_coding	2520.07	-0.136296	0.0705653	-1.93149	0.0534224	0.206725
ENSG00000136824.18	SMC2	protein_coding	4068.17	0.118516	0.0613818	1.9308	0.0535078	0.206948
ENSG00000061936.9	SFSWAP	protein_coding	3640.51	-0.108483	0.056256	-1.92838	0.0538073	0.207999
ENSG00000146540.14	C7orf50	protein_coding	5714.55	-0.111138	0.0576597	-1.92748	0.0539196	0.208326
ENSG00000166333.13	ILK	protein_coding	4278.16	-0.101917	0.0529495	-1.9248	0.0542548	0.209513
ENSG00000151726.13	ACSL1	protein_coding	2457.56	0.124903	0.0649036	1.92444	0.0542998	0.209545
ENSG00000168067.11	MAP4K2	protein_coding	2885.81	-0.120954	0.0628564	-1.92428	0.0543191	0.209545
ENSG00000087074.7	PPP1R15A	protein_coding	2425.1	-0.127224	0.066139	-1.92358	0.0544068	0.209775
ENSG00000005249.12	PRKAR2B	protein_coding	3794.59	0.10937	0.0568695	1.92317	0.0544591	0.209868
ENSG00000160216.18	AGPAT3	protein_coding	10524.5	-0.0741652	0.0385825	-1.92225	0.0545741	0.209987
ENSG00000147650.11	LRP12	protein_coding	2882.31	0.116386	0.0605442	1.92234	0.0545636	0.209987
ENSG00000118707.9	TGIF2	protein_coding	1415.38	0.164959	0.0858107	1.92236	0.0545609	0.209987
ENSG00000136159.3	NUDT15	protein_coding	3330.69	0.110241	0.0573852	1.92107	0.0547226	0.210212
ENSG00000109180.14	OCIAD1	protein_coding	4086.12	0.103673	0.0539777	1.92067	0.054773	0.210212
ENSG00000109133.12	TMEM33	protein_coding	4288.53	0.105113	0.054705	1.92145	0.0546753	0.210212
ENSG00000105576.15	TNPO2	protein_coding	11292.5	-0.0733634	0.0381838	-1.92132	0.0546913	0.210212
ENSG00000132388.12	UBE2G1	protein_coding	4240.58	0.100477	0.0523086	1.92084	0.0547517	0.210212
ENSG00000033050.8	ABCF2	protein_coding	8828.79	-0.0804664	0.0419047	-1.92022	0.0548299	0.210322
ENSG00000183778.17	B3GALT5	protein_coding	1553.52	0.159195	0.0829456	1.91927	0.0549504	0.21046
ENSG00000164190.17	NIPBL	protein_coding	5830.72	0.10242	0.0533626	1.91932	0.0549439	0.21046
ENSG00000197122.11	SRC	protein_coding	5955.25	-0.0963579	0.050203	-1.91937	0.0549379	0.21046
ENSG00000169379.15	ARL13B	protein_coding	1417.41	0.157669	0.0821896	1.91836	0.055066	0.210744
ENSG00000001561.6	ENPP4	protein_coding	1875.63	0.146452	0.0763472	1.91824	0.0550807	0.210744
ENSG00000108506.12	INTS2	protein_coding	3101.44	0.125405	0.0653845	1.91796	0.0551164	0.210772
ENSG00000176623.11	RMDN1	protein_coding	2553.95	0.121959	0.0635983	1.91764	0.0551563	0.210817
ENSG00000088205.12	DDX18	protein_coding	6640.11	0.0899085	0.0468904	1.91742	0.0551852	0.21082
ENSG00000023516.8	AKAP11	protein_coding	2883.24	0.122665	0.0640266	1.91584	0.0553856	0.210958
ENSG00000105793.15	GTPBP10	protein_coding	1884.27	0.141865	0.0740136	1.91674	0.0552715	0.210958
ENSG00000170604.4	IRF2BP1	protein_coding	1975.2	-0.145225	0.0758061	-1.91574	0.055398	0.210958
ENSG00000115694.14	STK25	protein_coding	5212.39	-0.0968039	0.0505351	-1.91558	0.0554187	0.210958
ENSG00000116030.16	SUMO1	protein_coding	5873	0.0894369	0.0466775	1.91606	0.0553577	0.210958
ENSG00000181458.10	TMEM45A	protein_coding	1686.08	0.146472	0.0764545	1.9158	0.05539	0.210958
ENSG00000149823.8	VPS51	protein_coding	4824.91	-0.100212	0.0523061	-1.91587	0.055381	0.210958
ENSG00000135720.12	DYNC1LI2	protein_coding	6210.17	0.0924639	0.0482826	1.91506	0.0554853	0.211104
ENSG00000088367.21	EPB41L1	protein_coding	4702.91	-0.0957589	0.0500291	-1.91407	0.0556118	0.211377
ENSG00000124313.14	IQSEC2	protein_coding	1272.1	-0.165997	0.0867358	-1.91383	0.0556419	0.211377
ENSG00000101166.15	PRELID3B	protein_coding	8733.97	0.0857844	0.0448196	1.914	0.0556207	0.211377
ENSG00000170581.13	STAT2	protein_coding	1319.66	-0.164285	0.0858602	-1.9134	0.0556963	0.211476
ENSG00000161692.17	DBF4B	protein_coding	1442.11	-0.160958	0.0841937	-1.91176	0.055907	0.212102
ENSG00000144224.16	UBXN4	protein_coding	5714.81	0.0985538	0.0515536	1.91168	0.0559177	0.212102
ENSG00000166411.13	IDH3A	protein_coding	5810.92	0.089611	0.046888	1.91117	0.0559825	0.21224
ENSG00000129292.20	PHF20L1	protein_coding	6330.75	0.0933769	0.0488821	1.91025	0.0561014	0.212583
ENSG00000106541.11	AGR2	protein_coding	9551.68	0.0796609	0.0417345	1.90876	0.0562937	0.213095
ENSG00000146676.8	PURB	protein_coding	6270.43	0.0890955	0.0466735	1.90891	0.056274	0.213095
ENSG00000048991.16	R3HDM1	protein_coding	4309.4	-0.105033	0.0550395	-1.90833	0.056349	0.213197
ENSG00000072958.8	AP1M1	protein_coding	6536.94	-0.0871254	0.0456701	-1.90771	0.0564283	0.213389
ENSG00000005100.12	DHX33	protein_coding	4153.53	0.106981	0.0561052	1.90679	0.056548	0.213734
ENSG00000113460.12	BRIX1	protein_coding	3379.31	0.114572	0.0601003	1.90634	0.0566055	0.213742
ENSG00000147889.17	CDKN2A	protein_coding	2769.29	-0.128727	0.0675317	-1.90618	0.0566271	0.213742
ENSG00000092439.14	TRPM7	protein_coding	4066.15	0.103906	0.0545118	1.90611	0.056636	0.213742
ENSG00000077097.15	TOP2B	protein_coding	13581.5	0.0789584	0.0414342	1.90564	0.0566974	0.213758
ENSG00000205189.11	ZBTB10	protein_coding	1522.52	0.161741	0.084875	1.90564	0.0566971	0.213758
ENSG00000062485.18	CS	protein_coding	16426	-0.0713559	0.0374622	-1.90474	0.0568134	0.21398
ENSG00000100311.16	PDGFB	protein_coding	2346.25	-0.128533	0.0674731	-1.90495	0.0567868	0.21398
ENSG00000117505.12	DR1	protein_coding	6281.45	0.0893392	0.046924	1.90391	0.0569217	0.21428
ENSG00000009307.15	CSDE1	protein_coding	42996.2	0.0570238	0.0299914	1.90134	0.0572577	0.215437
ENSG00000133884.9	DPF2	protein_coding	4480.28	-0.0964096	0.0507366	-1.9002	0.0574074	0.21576
ENSG00000088256.8	GNA11	protein_coding	5932.06	-0.0882597	0.046452	-1.90002	0.0574303	0.21576
ENSG00000181638.17	ZFP41	protein_coding	2044.87	-0.133908	0.0704612	-1.90046	0.0573732	0.21576
ENSG00000110400.10	NECTIN1	protein_coding	5097.56	-0.0927003	0.0488007	-1.89957	0.0574898	0.215875
ENSG00000183853.17	KIRREL	protein_coding	5363.25	-0.0903679	0.0475792	-1.89931	0.0575232	0.215893
ENSG00000127220.5	ABHD8	protein_coding	3050.9	-0.129786	0.0683646	-1.89843	0.0576391	0.215983
ENSG00000072415.8	MPP5	protein_coding	13665.4	0.0735355	0.0387266	1.89884	0.0575859	0.215983
ENSG00000110013.12	SIAE	protein_coding	1640.41	0.147814	0.077866	1.89831	0.0576548	0.215983
ENSG00000137822.12	TUBGCP4	protein_coding	5769.04	-0.0930066	0.0489959	-1.89825	0.0576628	0.215983
ENSG00000142871.16	CYR61	protein_coding	6829.88	-0.0871913	0.0459465	-1.89767	0.0577393	0.216161
ENSG00000167470.12	MIDN	protein_coding	2155.64	-0.13028	0.0687119	-1.89604	0.0579554	0.216862
[truncated: 56,382 more rows]

## Sheet: 3. V7 22YtoF_vs_control
ID	Gene_Symbol	Type	baseMean	log2FoldChange	lfcSE	stat	pvalue	padj
ENSG00000091986.15	CCDC80	protein_coding	1685.3	3.8423	0.100882	38.087	0	0
ENSG00000166426.7	CRABP1	protein_coding	1812.27	-2.63739	0.0832935	-31.6639	4.88835e-220	3.97888e-216
ENSG00000170477.12	KRT4	protein_coding	4440.11	-1.67207	0.0536123	-31.1882	1.53798e-213	8.3456e-210
ENSG00000117983.17	MUC5B	protein_coding	7284.78	-1.60608	0.0557946	-28.7856	3.25298e-182	1.32388e-178
ENSG00000133019.11	CHRM3	protein_coding	1613.07	-2.22123	0.0845189	-26.2809	3.17225e-152	1.03282e-148
ENSG00000164176.12	EDIL3	protein_coding	6999.05	-1.22341	0.0471083	-25.9702	1.0751e-148	2.91693e-145
ENSG00000096060.14	FKBP5	protein_coding	3834.41	1.45736	0.0565542	25.7692	1.963e-146	4.5651e-143
ENSG00000101188.4	NTSR1	protein_coding	3511.97	-1.51376	0.0609543	-24.8343	3.82063e-136	7.77451e-133
ENSG00000205426.10	KRT81	protein_coding	29251.8	-0.853113	0.0364612	-23.3978	4.49773e-121	8.13539e-118
ENSG00000118523.5	CTGF	protein_coding	3080.08	1.40549	0.0621947	22.5982	4.5112e-113	7.34378e-110
ENSG00000174403.15	C20orf200	antisense	2093.98	-1.65631	0.0745277	-22.2241	2.00964e-109	2.97409e-106
ENSG00000162981.13	FAM84A	protein_coding	2932.38	-1.35166	0.062137	-21.7529	6.4831e-105	8.79487e-102
ENSG00000257743.8	MGAM2	protein_coding	737.635	-2.87874	0.133099	-21.6286	9.67215e-104	1.21118e-100
ENSG00000106366.8	SERPINE1	protein_coding	1921.07	1.69416	0.0784879	21.585	2.48498e-103	2.8895e-100
ENSG00000135480.15	KRT7	protein_coding	7094.87	-0.977081	0.0457857	-21.3403	4.79522e-101	5.2041e-98
ENSG00000215183.4	MSMP	protein_coding	58638.9	-0.821877	0.0387111	-21.2311	4.93446e-100	5.0205e-97
ENSG00000127954.12	STEAP4	protein_coding	4110.24	-1.18752	0.0561572	-21.1464	2.97748e-99	2.8512e-96
ENSG00000134363.11	FST	protein_coding	25590.2	-0.695562	0.0331088	-21.0083	5.50246e-98	4.97637e-95
ENSG00000125148.6	MT2A	protein_coding	5441.77	1.01556	0.0485614	20.9129	4.08821e-97	3.50274e-94
ENSG00000167244.19	IGF2	protein_coding	113882	0.609929	0.0313711	19.4424	3.38178e-84	2.7526e-81
ENSG00000157613.10	CREB3L1	protein_coding	8003.16	-0.841791	0.0441149	-19.0818	3.57795e-81	2.77359e-78
ENSG00000250722.5	SEPP1	protein_coding	397.366	3.76222	0.20127	18.6924	5.70811e-78	4.22375e-75
ENSG00000081803.15	CADPS2	protein_coding	9402.74	-0.766705	0.041189	-18.6143	2.45962e-77	1.74087e-74
ENSG00000104368.17	PLAT	protein_coding	114189	-0.560029	0.0302978	-18.4841	2.77071e-76	1.87935e-73
ENSG00000100234.11	TIMP3	protein_coding	5695.33	-0.888285	0.0487667	-18.215	3.92379e-74	2.55501e-71
ENSG00000108679.12	LGALS3BP	protein_coding	10564.1	-0.699166	0.0384704	-18.1742	8.26974e-74	5.17781e-71
ENSG00000160182.2	TFF1	protein_coding	2818.31	-1.33181	0.073339	-18.1597	1.07675e-73	6.49198e-71
ENSG00000183696.13	UPP1	protein_coding	1889.54	1.46943	0.0809855	18.1444	1.4221e-73	8.26797e-71
ENSG00000132470.13	ITGB4	protein_coding	19351.8	-0.611007	0.0336873	-18.1376	1.60842e-73	9.02876e-71
ENSG00000145147.19	SLIT2	protein_coding	6853.53	-0.893537	0.0495127	-18.0466	8.38721e-73	4.55118e-70
ENSG00000131771.13	PPP1R1B	protein_coding	1052.82	-1.77769	0.0987895	-17.9948	2.14141e-72	1.12452e-69
ENSG00000170961.6	HAS2	protein_coding	3718.23	1.00067	0.0558634	17.9128	9.3659e-72	4.76461e-69
ENSG00000197635.9	DPP4	protein_coding	4759.33	-0.898421	0.0511346	-17.5697	4.20225e-69	2.07298e-66
ENSG00000149948.13	HMGA2	protein_coding	7529.59	0.850473	0.0485235	17.527	8.91094e-69	4.26651e-66
ENSG00000116285.12	ERRFI1	protein_coding	11780	0.673469	0.0387371	17.3856	1.06016e-67	4.93094e-65
ENSG00000108551.4	RASD1	protein_coding	510.296	2.62926	0.154742	16.9912	9.53468e-65	4.31153e-62
ENSG00000171345.13	KRT19	protein_coding	19039.9	-0.659951	0.0392557	-16.8116	2.00729e-63	8.83153e-61
ENSG00000159840.15	ZYX	protein_coding	22331.4	-0.590624	0.0353732	-16.6969	1.38003e-62	5.91197e-60
ENSG00000215182.8	MUC5AC	protein_coding	29511.6	-1.82438	0.11018	-16.5582	1.39676e-61	5.83024e-59
ENSG00000134247.9	PTGFRN	protein_coding	3361.16	0.975344	0.0599672	16.2646	1.75916e-59	7.15933e-57
ENSG00000182809.10	CRIP2	protein_coding	3059.56	-0.983583	0.0610478	-16.1117	2.11155e-58	8.38388e-56
ENSG00000167996.15	FTH1	protein_coding	166696	-0.418124	0.0263944	-15.8414	1.61236e-56	6.24942e-54
ENSG00000065054.13	SLC9A3R2	protein_coding	11196.9	-0.704499	0.0453636	-15.53	2.17233e-54	8.22404e-52
ENSG00000176658.16	MYO1D	protein_coding	2975.71	-0.943823	0.060959	-15.4829	4.52461e-54	1.674e-51
ENSG00000091490.10	SEL1L3	protein_coding	7933.8	-0.691486	0.0448117	-15.4309	1.01404e-53	3.66835e-51
ENSG00000131746.12	TNS4	protein_coding	968.626	-1.60116	0.10444	-15.3309	4.75312e-53	1.68209e-50
ENSG00000244509.3	APOBEC3C	protein_coding	52787.5	-0.52222	0.0343585	-15.1992	3.58138e-52	1.24045e-49
ENSG00000173175.14	ADCY5	protein_coding	429.088	-2.41855	0.159705	-15.1438	8.32149e-52	2.8222e-49
ENSG00000189221.9	MAOA	protein_coding	295.844	3.1663	0.211512	14.9698	1.15643e-50	3.84195e-48
ENSG00000064651.13	SLC12A2	protein_coding	10874.6	-0.609901	0.0407897	-14.9523	1.50379e-50	4.89603e-48
ENSG00000137285.9	TUBB2B	protein_coding	2698	-0.952568	0.0637565	-14.9407	1.79062e-50	5.7156e-48
ENSG00000005249.12	PRKAR2B	protein_coding	2808.93	-0.911991	0.0618235	-14.7515	3.00779e-49	9.41612e-47
ENSG00000079215.13	SLC1A3	protein_coding	906.786	1.53169	0.105652	14.4975	1.2564e-47	3.85904e-45
ENSG00000138829.11	FBN2	protein_coding	15207.6	-0.571862	0.0400885	-14.265	3.61732e-46	1.09049e-43
ENSG00000167772.11	ANGPTL4	protein_coding	785.722	1.64948	0.115922	14.2292	6.03866e-46	1.78733e-43
ENSG00000116016.13	EPAS1	protein_coding	2538.07	0.933398	0.066664	14.0015	1.52554e-44	4.43469e-42
ENSG00000134827.7	TCN1	protein_coding	1041.45	-1.42118	0.102563	-13.8567	1.15936e-43	3.31108e-41
ENSG00000128342.4	LIF	protein_coding	4098.72	-0.730834	0.0529807	-13.7943	2.75681e-43	7.7376e-41
ENSG00000163083.5	INHBB	protein_coding	7536.46	-0.585467	0.0428953	-13.6487	2.05373e-42	5.66656e-40
ENSG00000108691.9	CCL2	protein_coding	495.333	-1.99334	0.146136	-13.6403	2.30679e-42	6.2587e-40
ENSG00000166825.13	ANPEP	protein_coding	13383.9	-0.505486	0.0371329	-13.6129	3.35795e-42	8.96131e-40
ENSG00000163359.15	COL6A3	protein_coding	12171.4	0.534449	0.0394701	13.5406	9.00453e-42	2.36427e-39
ENSG00000134193.14	REG4	protein_coding	908.502	-1.42379	0.105465	-13.5001	1.56071e-41	4.03283e-39
ENSG00000198788.8	MUC2	protein_coding	1732.94	-1.1798	0.0874177	-13.4961	1.64941e-41	4.19543e-39
ENSG00000130066.16	SAT1	protein_coding	2416.96	0.916918	0.0682134	13.4419	3.43451e-41	8.60159e-39
ENSG00000197410.13	DCHS2	protein_coding	3615.94	-0.811742	0.0606429	-13.3856	7.33938e-41	1.81027e-38
ENSG00000122861.15	PLAU	protein_coding	47055.8	0.40164	0.0301022	13.3425	1.30931e-40	3.18122e-38
ENSG00000172164.13	SNTB1	protein_coding	724.629	1.59741	0.12012	13.2985	2.3624e-40	5.65551e-38
ENSG00000104413.16	ESRP1	protein_coding	321.343	-2.49521	0.189897	-13.1398	1.94812e-39	4.59616e-37
ENSG00000124145.6	SDC4	protein_coding	6088.53	0.656928	0.0508388	12.9218	3.39255e-38	7.88961e-36
ENSG00000087495.16	PHACTR3	protein_coding	2990.14	-0.81451	0.0634163	-12.8439	9.30988e-38	2.13458e-35
ENSG00000196562.14	SULF2	protein_coding	32816.3	-0.387777	0.0303497	-12.7769	2.20591e-37	4.98751e-35
ENSG00000079257.7	LXN	protein_coding	4804.89	-0.634235	0.049825	-12.7293	4.06622e-37	9.06767e-35
ENSG00000116991.10	SIPA1L2	protein_coding	3404.83	-0.792539	0.0623939	-12.7022	5.74986e-37	1.26489e-34
ENSG00000159784.17	FAM131B	protein_coding	1497.79	-1.03517	0.0818559	-12.6463	1.1727e-36	2.54538e-34
ENSG00000146648.17	EGFR	protein_coding	25972.9	0.441116	0.0349956	12.6049	1.98432e-36	4.25036e-34
ENSG00000143878.9	RHOB	protein_coding	1402.85	1.06468	0.0847445	12.5634	3.35504e-36	7.09308e-34
ENSG00000116741.7	RGS2	protein_coding	4810.43	-0.629165	0.0500833	-12.5624	3.40022e-36	7.09642e-34
ENSG00000124664.10	SPDEF	protein_coding	2988.32	-0.789024	0.062887	-12.5467	4.14405e-36	8.53937e-34
ENSG00000005884.17	ITGA3	protein_coding	27910.2	-0.413759	0.0330152	-12.5324	4.96632e-36	1.01058e-33
ENSG00000213949.8	ITGA1	protein_coding	1176.95	-1.24018	0.0991618	-12.5067	6.86443e-36	1.37958e-33
ENSG00000106541.11	AGR2	protein_coding	7893.67	-0.531923	0.0429018	-12.3986	2.6593e-35	5.27936e-33
ENSG00000153292.15	ADGRF1	protein_coding	8564.81	-0.51521	0.0416069	-12.3828	3.23844e-35	6.35163e-33
ENSG00000143013.12	LMO4	protein_coding	2719.63	-0.784536	0.0635648	-12.3423	5.36003e-35	1.03876e-32
ENSG00000132688.10	NES	protein_coding	5500.36	-0.585996	0.0482738	-12.139	6.561e-34	1.25655e-31
ENSG00000115758.12	ODC1	protein_coding	51351.6	-0.387018	0.0318965	-12.1336	7.01129e-34	1.32717e-31
ENSG00000081913.13	PHLPP1	protein_coding	4635.91	-0.681851	0.056521	-12.0637	1.64299e-33	3.07428e-31
ENSG00000159184.7	HOXB13	protein_coding	17572.7	-0.412873	0.0346678	-11.9094	1.05727e-32	1.95583e-30
ENSG00000160223.17	ICOSLG	protein_coding	2473.75	-0.776846	0.0652814	-11.9	1.18398e-32	2.16562e-30
ENSG00000137962.12	ARHGAP29	protein_coding	21861.3	-0.418322	0.0351852	-11.8891	1.34801e-32	2.43825e-30
ENSG00000128510.10	CPA4	protein_coding	2497.07	0.767581	0.0649672	11.8149	3.26936e-32	5.84857e-30
ENSG00000123384.13	LRP1	protein_coding	8608.58	-0.567109	0.0483771	-11.7227	9.75582e-32	1.72625e-29
ENSG00000165449.11	SLC16A9	protein_coding	4379.04	-0.694851	0.0594379	-11.6904	1.42757e-31	2.49886e-29
ENSG00000184640.17	SEPT9	protein_coding	47635.7	-0.338209	0.0289376	-11.6875	1.47665e-31	2.55727e-29
[truncated: 58,287 more rows]
[truncated: 9 more columns]

## Sheet: 4. V7 22YtoS_vs_AR V7
ID	Gene_Symbol	Type	baseMean	log2FoldChange	lfcSE	stat	pvalue	padj
[truncated: 58,381 more rows]

[truncated: 6 more sheets: 5. V7 22YtoF_vs_AR V7, 6. V7 22YtoF_vs_V7 22YtoS, 7. GSEA datasets, 8. Source data S3J, 9. Source data S3K, 10. Source data S3L]
