# Supplementary material for: Rational optimization of a transcription factor activation domain inhibitor
Source: Nat Struct Mol Biol. 2023 Dec 4;30(12):1958–69. doi: 10.1038/s41594-023-01159-5 (PMC10716049; doi:10.1038/s41594-023-01159-5)
Supplement: Supplementary file 12 — Sequences of primers and synthetic genes. [file 41594_2023_1159_MOESM12_ESM.xlsx]

## Sheet: GFP-AR FL, V7, and ∆NLS cloning
ΔNLS forward primer:
CTTGGTAATCTGAAACTACAGGAG
ΔNLS reverse primer:
GGCTCCCAGAGTCATCCC

## Sheet: pEGFPC1A-V7
V7 forward primer:
GCACCTGAAGATGACCAGGCCCTGAGCCCGGAAGCTGAAGAAA
V7 reverse primer:
TTGCAGTTGCCCACCCTGAACTTCTCTCCCAGAGTCATCCCTGC

## Sheet: mEGFP constructs
AR-V7 ΔAD forward primer:
AGTTCGTGACCGCCGCCGGGATCACTCTCGGCATGGACGAGCTGTACAAGCTGATCTGTGGAGATGAAGC
AR-V7 ΔAD reverse primer:
CAATAAACAAGTTGGGCCATGGCGGCCAAGCCTCTACAAATGTGGTATGGC

## Sheet: YtoS mutants for mammalian exp.
22YtoS synthetic gene
AAGCTTCTAATAGCGCCGTGGACGGCACCATGGAAGTGCAGCTGGGACTGGGCAGAGTGAGCCCCAGACCTCCCAGCAAAACATCCAGAGGAGCCTTCCAAAACCTGTTCCAGAGCGTGCGCGAAGTGATTCAGAACCCCGGCCCTAGACACCCTGAGGCTGCCAGCGCCGCCCCTCCCGGCGCCAGCCTGCTGTTGCTGCAGCAGCAGCAGCAGCAACAGCAGCAGCAGCAGCAGCAGCAGCAGCAGCAGCAGCAGCAGCAACAGGAGACAAGCCCCAGACAGCAGCAGCAGCAGCAGGGCGAGGATGGCAGCCCCCAGGCGCACCGGAGAGGCCCTACCGGCAGCCTCGTGCTGGACGAGGAACAGCAGCCTAGCCAGCCTCAATCCGCCCTTGAGT…
14YtoS synthetic gene:
AAGCTTCTAATAGCGCCGTCGACGGCACCATGGAAGTGCAGCTGGGCCTGGGAAGAGTGTCCCCTCGGCCCCCCTCTAAGACCAGCAGGGGCGCTTTTCAGAATCTGTTCCAGAGCGTGCGGGAGGTGATCCAGAACCCTGGCCCAAGACACCCTGAGGCTGCTTCCGCCGCCCCACCTGGTGCGAGCCTGCTGCTCCTTCAGCAGCAGCAGCAACAGCAGCAGCAACAGCAGCAGCAGCAACAGCAGCAACAGCAGCAACAGCAGGAGACCTCTCCTAGACAGCAGCAGCAGCAGCAAGGCGAAGATGGCAGCCCTCAGGCCCACCGGAGAGGCCCCACAGGCTCCCTGGTGCTGGATGAGGAACAGCAACCTAGCCAGCCACAGTCTGCGCTGGAAT…
8YtoS synthetic gene:
AAGCTTCTAACAGCGCTGTGGACGGCACAATGGAAGTGCAACTGGGCCTGGGGCGCGTGTACCCCAGGCCTCCTTCCAAAACCTACAGAGGCGCCTTCCAGAACCTGTTTCAGAGCGTGAGAGAGGTGATTCAGAATCCTGGCCCTAGACATCCTGAGGCAGCGAGCGCCGCCCCTCCTGGCGCCTCTCTGCTGCTCCTGCAACAGCAACAGCAGCAGCAGCAGCAGCAGCAGCAGCAGCAGCAGCAGCAGCAGCAGCAGCAGCAGGAGACCAGCCCCAGACAGCAACAACAACAGCAGGGCGAGGATGGCAGCCCTCAGGCCCACAGACGGGGACCTACAGGCTACCTGGTGCTGGACGAGGAACAGCAGCCTAGCCAGCCCCAGTCTGCCCTGGAGT…

## Sheet: YtoS mutants for baterial exp. 
22YtoS synthetic gene:
GAGAACCTGTATTTTCAAGGTATGGAAGTTCAGTTAGGTCTGGGTCGTGTTAGTCCGCGTCCGCCTAGCAAAACCAGCCGTGGTGCATTTCAGAATCCGTTTCAGAGCGTTCGTGAAGTTATCCAGAATCCGGGTCCGCGTCATCCGGAAGCAGCAAGCGCAGCACCGCCTGGTGCAAGCCTGCTGCTGCTTCAGCAGCAACAACAGCAGCAACAGCAACAGCAGCAACAACAACAACAACAGCAGCAACAGCAAGAAACCAGTCCGCGTCAACAGCAACAGCAACAAGGTGAAGATGGTAGTCCGCAGGCACATCGTCGTGGTCCGACCGGTAGCCTGGTTCTGGATGAAGAACAGCAGCCGAGCCAGCCGCAGAGCGCACTGGAATGCCATCCGGAA…
14YtoS synthetic gene:
GAGAACCTGTATTTTCAAGGTATGGAAGTTCAGTTAGGTCTGGGTCGTGTTAGTCCGCGTCCGCCTAGCAAAACCAGCCGTGGTGCATTTCAGAATCCGTTTCAGAGCGTTCGTGAAGTTATCCAGAATCCGGGTCCGCGTCATCCGGAAGCAGCAAGCGCAGCACCGCCTGGTGCAAGCCTGCTGCTGCTTCAGCAGCAACAACAGCAGCAACAGCAACAGCAGCAACAACAACAACAACAGCAGCAACAGCAAGAAACCAGTCCGCGTCAACAGCAACAGCAACAAGGTGAAGATGGTAGTCCGCAGGCACATCGTCGTGGTCCGACCGGTAGCCTGGTTCTGGATGAAGAACAGCAGCCGAGCCAGCCGCAGAGCGCACTGGAATGCCATCCGGAA…
8YtoS synthetic gene:
GAGAACCTGTATTTTCAAGGTATGGAAGTTCAGTTAGGTCTGGGTCGTGTTTATCCGCGTCCGCCTAGCAAAACCTATCGTGGTGCATTTCAGAATCCGTTTCAGAGCGTTCGTGAAGTTATCCAGAATCCGGGTCCGCGTCATCCGGAAGCAGCAAGCGCAGCACCGCCTGGTGCAAGCCTGCTGCTGCTTCAGCAGCAACAACAGCAGCAACAGCAACAGCAGCAACAACAACAACAACAGCAGCAACAGCAAGAAACCAGTCCGCGTCAACAGCAACAGCAACAAGGTGAAGATGGTAGTCCGCAGGCACATCGTCGTGGTCCGACCGGTTATCTGGTTCTGGATGAAGAACAGCAGCCGAGCCAGCCGCAGAGCGCACTGGAATGCCATCCGGAA…

## Sheet: AR helix-breaking mutagenesis
AR helix breaking mutagenesis strategy
pDONR221-AR-AD-WT:
GAGAACCTGTATTTTCAGGGTATGGAAGTTCAGCTGGGTCTGGGTCGTGTTTATCCGCGTCCGCCTAGCAAAACCTATCGTGGTGCATTTCAGAACCTGTTTCAGAGCGTTCGTGAAGTTATTCAGAATCCGGGTCCGCGTCATCCGGAAGCAGCAAGCGCAGCACCGCCTGGTGCAAGCTTACTGCTGCTGCAACAGCAACAGCAGCAGCAACAACAGCAGCAACAGCAACAACAACAACAACAGCAGCAGCAAGAAACCAGTCCGCGTCAACAGCAACAGCAACAGGGTGAAGATGGTAGTCCGCAGGCACATCGTCGTGGTCCGACCGGTTATCTGGTTCTGGATGAAGAACAGCAGCCGAGCCAGCCGCAGAGCGCACTGGAATGCCATCCGGAA…
pDEST17-AR-AD-WT*:
L26P forward primer:
TGGTGCATTTCAGAACCCGTTTCAGAGCGTTCGTG
L26P reverse primer:
CACGAACGCTCTGAAACGGGTTCTGAAATGCACCA
pDEST17-AR-AD-L56P*:
L56P forward primer:
GCAAGCTTACTGCTGCCGCAACAGCAACAGCAG
L56P reverse primer:
CTGCTGTTGCTGTTGCGGCAGCAGTAAGCTTGC
pDEST17-AR-AD-Tau-1*:
A186P, L192P forward primer:
GATATTCTGAGCGAACCAAGCACCATGCAGCTGCCGCAACAACAGCAACA
A186P, L192P reverse primer:
TTGCTGTTGTTGCGGCAGCTGCATGGTGCTTGGTTCGCTCAGAATATCTT
C238P forward primer:
TAGCGATAATGCAAAAGAACTGCCGAAAGCCGTTAGCGTTAGCATGG
C238P reverse primer:
CCATGCTAACGCTAACGGCTTTCGGCAGTTCTTTTGCATTATCGCTA
pDEST17-AR-AD-Tau-5*:
A356P forward primer:
CCTGGATGAGGCAGCACCGTATCAGAGCCGTGATT
A356P reverse primer:
AATCACGGCTCTGATACGGTGCTGCCTCATCCAGG
A398P forward primer:
GGTAGCGCATGGCCGGCCGCAGCCGCA
A398P reverse primer:
TGCGGCTGCGGCCGGCCATGCGCTACC
T435P forward primer:
CAAGCAGCTCATGGCATCCGCTGTTTACAGCCGAAG
T435P reverse primer:
CTTCGGCTGTAAACAGCGGATGCCATGAGCTGCTTG
pDEST17-AR-AD-L56P+Tau-1+Tau-5*:
L56P forward primer:
GCAAGCTTACTGCTGCCGCAACAGCAACAGCAG
L56P reverse primer:
CTGCTGTTGCTGTTGCGGCAGCAGTAAGCTTGC
A186P, L192P forward primer:
GATATTCTGAGCGAACCAAGCACCATGCAGCTGCCGCAACAACAGCAACA
A186P, L192P reverse primer:
TTGCTGTTGTTGCGGCAGCTGCATGGTGCTTGGTTCGCTCAGAATATCTT
C238P forward primer:
TAGCGATAATGCAAAAGAACTGCCGAAAGCCGTTAGCGTTAGCATGG
C238P reverse primer:
CCATGCTAACGCTAACGGCTTTCGGCAGTTCTTTTGCATTATCGCTA
eGFP-AR-ΔNLS-Δ21-35:
ARΔ21-35 forward primer:
AATTCTGCAGTCGACGGTACCATGGAAGTGCAGTTAGGGCTGGGAAGGGTC
ARΔ21-35 reverse primer:
GGAGCAGCTGCTTAAGCCGGGGAAAGTGG
eGFP-AR-ΔNLS-Tau-1:
A186P, L192P forward primer:
GATATTCTGAGCGAACCAAGCACCATGCAGCTGCCGCAACAACAGCAACA
A186P, L192P reverse primer:
TTGCTGTTGTTGCGGCAGCTGCATGGTGCTTGGTTCGCTCAGAATATCTT
C238P forward primer:
TAGCGATAATGCAAAAGAACTGCCGAAAGCCGTTAGCGTTAGCATGG
C238P reverse primer:
CCATGCTAACGCTAACGGCTTTCGGCAGTTCTTTTGCATTATCGCTA
Tau-1 forward primer:
CTTTCCCCGGCTTAAGCAGCTGTAGCGCAGATCTGAAAGATATTCTGAGCG
Tau-1 reverse primer:
GCGGCTGAGGGTGACCCGCTACCCGGACCGGCTGCAC
eGFP-AR-ΔNLS-Tau-5:
A356P forward primer:
CCTGGATGAGGCAGCACCGTATCAGAGCCGTGATT
A356P reverse primer:
AATCACGGCTCTGATACGGTGCTGCCTCATCCAGG
A398P forward primer:
GGTAGCGCATGGCCGGCCGCAGCCGCA
A398P reverse primer:
TGCGGCTGCGGCCGGCCATGCGCTACC
T435P forward primer:
CAAGCAGCTCATGGCATCCGCTGTTTACAGCCGAAG
T435P reverse primer:
CTTCGGCTGTAAACAGCGGATGCCATGAGCTGCTTG
Tau-5 forward primer:
ATTCTGCAGTCGACGGTACCATGGAAGTTCAGCTGGGTCTGGGTCGTG
Tau-5 reverse primer:
CACCATGCCGCCAGGGTACCAAACATCCGGTGCGGTAAAATCGCTTTCTTGGC

## Sheet: BioID plasmid generation
FLAG-MTID synthetic gene:
TCTAGAGCGCTGCCACCATGGATTACAAGGATGACGACGATAAGATCCGCATCCCGCTGCTGAACGCTAAACAGATTCTGGGACAGCTGGACGGCGGGAGCGTGGCAGTCCTGCCTGTGGTCGACTCCACCAATCAGTACCTGCTGGATCGAATCGGCGAGCTGAAGAGTGGGGATGCTTGCATTGCAGAATATCAGCAGGCAGGGAGAGGAAGCAGAGGGAGGAAATGGTTCTCTCCTTTTGGAGCTAACCTGTACCTGAGTATGTTTTGGCGCCTGAAGCGGGGACCAGCAGCAATCGGCCTGGGCCCGGTCATCGGAATTGTCATGGCAGAAGCGCTGCGAAAGCTGGGAGCAGACAAGGTGCGAGTCAAATGGCCCAATGACCTGTATCTGCAGG…
FLAG-MTID-AR-WT synthetic gene:
TCTAGAGCGCTGCCACCATGGACTACAAGGACGATGACGATAAGATCAGAATCCCCCTGCTGAACGCCAAGCAGATCCTGGGACAGCTGGATGGAGGCTCTGTGGCCGTGCTGCCAGTGGTGGACAGCACCAATCAGTACCTGCTGGATAGGATCGGCGAGCTGAAGAGCGGCGACGCCTGCATCGCCGAGTATCAGCAGGCAGGAAGGGGCTCTCGGGGAAGAAAGTGGTTCAGCCCATTTGGCGCCAACCTGTACCTGTCCATGTTCTGGCGGCTGAAGAGAGGACCAGCAGCAATCGGACTGGGACCTGTGATCGGCATCGTGATGGCAGAGGCCCTGAGGAAGCTGGGAGCAGACAAGGTGAGAGTGAAGTGGCCCAATGACCTGTATCTGCAGG…
FLAG-MTID-AR-WT-Y22toS synthetic gene:
TCTAGAGCGCTGCCACCATGGACTACAAGGACGATGACGATAAGATCAGAATCCCCCTGCTGAACGCCAAGCAGATCCTGGGACAGCTGGATGGAGGCTCTGTGGCCGTGCTGCCAGTGGTGGACAGCACCAATCAGTACCTGCTGGATAGGATCGGCGAGCTGAAGAGCGGCGACGCCTGCATCGCCGAGTATCAGCAGGCAGGAAGGGGCTCTCGGGGAAGAAAGTGGTTCAGCCCATTTGGCGCCAACCTGTACCTGTCCATGTTCTGGCGGCTGAAGAGAGGACCAGCAGCAATCGGACTGGGACCTGTGATCGGCATCGTGATGGCAGAGGCCCTGAGGAAGCTGGGAGCAGACAAGGTGAGAGTGAAGTGGCCCAATGACCTGTATCTGCAGG…

## Sheet: qRT-PCR
FKBP5 forward primer 1:
GCAACAGTAGAAATCCACCTG
FKBP5 reverse primer 1:
CTCCAGAGCTTTGTCAATTCC
FKBP5 forward primer 2:
AGGAGGGAAGAGTCCCAGTG
FKBP5 reverse primer 2:
TGGGAAGCTACTGGTTTTGC
PSA (KLK3) forward primer 1:
TGTGTGCTGGACGCTGGA
PSA (KLK3) reverse primer 1:
CACTGCCCCATGACGTGAT
PSA (KLK3) forward primer 2:
AGGCCTTCCCTGTACACCAA
PSA (KLK3) reverse primer 2:
GTCTTGGCCTGGTCATTTCC
β-Glucuronidase forward primer:
CTCATTTGGAATTTTGCCGATT
β-Glucuronidase reverse primer:
CCGAGTGAAGATCCCCTTTTTA

## Sheet: Gene expression analysis
AR-F ACATCAAGGAACTCGATCGTATCATTGC
AR-R CTGCCATCATTTCCGGAA
KLK2-F TGTGTGCTAGAGCTTACTCTGA
KLK2-R CCACTTCCGGTAATGCACCA
KLK3-F CCAAGTTCATGCTGTGTGCT
KLK3-R CCCATGACGTGATACCTTGA
FKBP5-F CGCAGGATATACGCCAACAT
FKBP5-R GAAGTCTTCTTGCCCATTGC
NKX3.1-F CCGAGACGCTGGCAGAGACC
NKX3.1-R GCTTAGGGGTTTGGGGAAG
AR-V7-F CCATCTTGTCGTCTTCGGAAATGTTAT
AR-V7-R TTTGAATGAGGCAAGTCAGCCTTTCT
CCNA2-F CTCTACACAGTCACGGGACAAAG
CCNA2-R CTGTGGTGCTTTGAGTGAGTTC
UBE2C-F TGGTCTGCCCTGTATGATGT
UBE2C-R AAAAGCTGTGGGGTTTTTCC
B4GALT1-F AGAACCCAAATGTGAAGATG
B4GALT1-R CCTGGTTGATAACATAGATGC
ALAS1-F AAATGAATGCCGTGAGGAAAGA
ALAS1-R CCTCCATCGGTTTTCACACTA
SDHA-F CAGCATGTGTTACCAAGCTGT
SDHA-R GGTGTCGTAGAAATGCCACCT
