# Supplementary material for: Rational optimization of a transcription factor activation domain inhibitor
Source: Nat Struct Mol Biol. 2023 Dec 4;30(12):1958–69. doi: 10.1038/s41594-023-01159-5 (PMC10716049; doi:10.1038/s41594-023-01159-5)
Supplement: Supplementary file 13 — Statistical source data. [file 41594_2023_1159_MOESM13_ESM.xlsx]

## Sheet: F1C
NMR I/I25
amino acid position	57,5 uM AR AD	100,8 uM AR AD	122,5 uM AR AD	155,0 uM AR AD
1
2	0.874924	0.590953	0.455433	0.468476
3	0.804684	0.501444	0.345039	0.411332
4	0.807313	0.493297	0.341084	0.391133
5	0.820007	0.506185	0.352847	0.43216
6	0.916634	0.727437	0.686793	0.850756
7	0.838984	0.546813	0.46552	0.495898
8	0.882499	0.625845	0.560707	0.552401
9	0.819827	0.556608	0.500482	0.514638
10	0.753647	0.453658	0.379318	0.361981
11
12
13
14
15
16	0.802057	0.667338	0.495966	0.523043
17
18	0.768096	0.512756	0.381256	0.354161
19
20	0.922713	0.816798	0.924004	0.977026
21	0.675085	0.265896	0.160656	0.187369
22	0.782517	0.507807	0.384655	0.448019
23	0.835217	0.733253	0.46261	0.640523
24	0.906222	0.717739	0.689719	0.66198
25
26	0.725324	0.419209	0.362416	0.391131
27	1.03531	0.928056	1.01052	0.849337
28	0.818662	0.535734	0.368144	0.461386
29	0.79459	0.561505	0.431903	0.447256
30	0.786626	0.495375	0.374671	0.4011
31	0.782954	0.50697	0.43948	0.445663
32	0.84632	0.661578	0.59665	0.781671
33	0.780206	0.465241	0.336699	0.37881
34	0.789296	0.507577	0.457543	0.495291
35	0.805319	0.497889	0.324854	0.394908
36	0.984216	0.770114	0.631775	0.698852
37
38	0.874029	0.610327	0.546565	0.500046
39
40	0.912067	0.718251	0.665457	0.666924
41	0.923221	1.00183
42
43	0.902231	0.603018	0.616867	0.481595
44	0.920823	0.697302	0.724422	0.618098
45	0.935924	0.787006	0.810691	0.698796
46	0.93674	0.784663	0.784489	0.696345
47	0.972687	0.808651	0.828777	0.707653
48	0.900645	0.664813	0.716763	0.587195
49
50
51	0.916167	0.785428	0.704891	0.687004
52	0.915036	0.760694	0.768579	0.667271
53	0.887659	0.798417	0.666156	0.653561
54	0.898765	0.62276	0.579968	0.573011
55	0.852016	0.584771	0.524093	0.531725
56	0.822322	0.528043	0.457354	0.454196
57	0.852085	0.609341	0.538136	0.527084
58	0.843564	0.581072	0.579722	0.540602
59
60	0.961913	0.802482	0.761722	0.742466
61	0.928722	0.800747	0.785004	0.732723
62
63
64
65
66
67
68
69
70
71
72
73
74
75
76
77	0.958574	0.794306	0.794828	0.7037
78	0.906675	0.713199	0.740981	0.668938
79	1.07411	1.0707
80	0.960688	0.833373	0.868909	0.689686
81	0.944537	0.774711	0.832802	0.688044
82	0.957182	0.819873	0.828316	0.730197
83	0.983265	0.798082	0.783569	0.653424
84
85	1.00297	0.84026	0.89406	0.714676
86
87	0.962308	0.868497	0.899567	0.776724
88	0.978046	0.913915	0.898486	0.784614
89	0.964055	0.850115	0.856942	0.777558
90	0.965432	0.826778	0.866782	0.737148
91	0.974495	0.869425	0.896622	0.803253
92	0.950753	0.825407	0.816917	0.714591
93	0.942724	0.838286	0.890331	0.686071
94	0.956037	0.841657	0.92696	0.671168
95	0.961107	0.876567	0.886688	0.764928
96	0.956366	0.823573	0.872517	0.631226
97
98	0.943603	0.821148	0.789598	0.649042
99	0.921437	0.782857	0.756329	0.66532
100	0.900352	0.657113	0.681931	0.596661
101	0.909682	0.695553	0.812176	0.63628
102	0.992372	0.853915	0.897657	0.746484
103	0.946696	0.75283	0.791887	0.628659
104
105	0.897187	0.62797	0.538972	0.527193
106	0.956745	0.756411	0.742143	0.611483
107	0.908275	0.704073	0.734072	0.601913
108	0.912017	0.664677	0.739978	0.601673
109	0.890406	0.691798	0.766259	0.643946
110	0.901134	0.637321	0.707925	0.549585
111	0.921005	0.717496	0.756513	0.567646
112	0.919419	0.718484	0.766529	0.602021
113	0.937313	0.787924	0.902062	0.709942
114	0.933633	0.751091	0.849637	0.629308
115	0.933025	0.760001	0.866457	0.656507
116
117	0.941443	0.776271	0.820945	0.627102
118	0.893037	0.711428	0.762078	0.595727
119
120	0.929449	0.775732	0.825881	0.627015
121	0.940126	0.774373	0.801385	0.688176
122	0.945665	0.883513	0.950991	0.828473
123	0.900724	0.726407	0.817998	0.658623
124	0.934635	0.743821	0.892838	0.638115
125	0.926457	0.787766	0.798719	0.724057
126	1.06837	1.06198	1.05773	0.889992
127
128	0.937118	0.674138	0.748707	0.614744
129	0.90943	0.767233	0.764569	0.715681
130	0.891614	0.803099	0.770452	0.671844
131	0.93153	0.874222	0.836646	0.838305
132	0.895896	0.719112	0.82877	0.595879
133
134	0.944639	0.779522	0.875313	0.555119
135
136	0.90429	0.844904	0.821467	0.670543
137	0.937424	0.845663	0.890699	0.667925
138	0.96513	0.873282	0.947195	0.74176
139	0.926073	0.771287	0.873189	0.615864
140	0.939537	0.812468	0.887353	0.640708
141	0.958545	0.867959	0.917183	0.735583
142	0.971103	0.912941	0.918586	0.826146
143	0.975782	1.0179	0.932241	0.870857
144	0.955497	0.917391	0.928842	0.792934
145	0.922957	0.752971	0.85169	0.642311
146
147	0.961201	0.818354	0.884674	0.640306
148	0.934494	0.810659	0.868952	0.674623
149	0.924933	0.682058	0.699095	0.555048
150
151	0.95513	0.724744	0.854971	0.565711
152
153
154	0.989606	0.792282	0.907583	0.622462
155	0.98973	0.839098	0.977717	0.698559
156	0.960325	0.829551	0.917437	0.671344
157	0.996486	0.918037	1.00128	0.789913
158	0.965573	0.87939	0.928205	0.674154
159	0.960661	0.843167	0.917457	0.609204
160	0.960745	0.797505	0.901996	0.52808
161
162	0.996945	0.930641	0.88163	0.708179
163	0.933151	0.915262	0.872419	0.809892
164	0.937647	0.829806	0.894688	0.631005
165	0.956867	0.874483	0.882708	0.757869
166	0.958388	0.89201	0.90993	0.774013
167	0.92415	0.757137	0.786749	0.620455
168	0.931911	0.780649	0.817302	0.61127
169
170	0.949022	0.852384	0.857185	0.691656
171	0.95189	0.835359	0.861917	0.70811
172
173	0.954006	0.857951	0.852542	0.685296
174	0.961773	0.875592	0.907022	0.757771
175	0.944777	0.894065	0.874049	0.873629
176	1.03664		0.952757	0.94636
177	0.967455	1.0791	1.01989	1.01278
178	0.848379	0.969423	0.74908	0.796576
179	0.935777	0.887009	0.856916	0.745653
180	0.936417	0.800696	0.83382	0.647176
181	0.926319	0.768559	0.76717	0.617787
182	0.937734	0.775287	0.791463	0.710994
183	0.913661	0.819256	0.833263	0.71392
184	0.931865	0.793249	0.809175	0.653477
185	0.884174	0.707055	0.708265	0.605906
186	0.914552	0.783201	0.749687	0.675912
187	0.935082	0.843197	0.837727	0.707811
188	0.949746	0.799219	0.824129	0.669005
189	0.958325	0.879167	0.864398	0.758359
190	0.926347	0.826281	0.776018	0.669129
191	0.919884	0.782745	0.814631	0.760609
192	0.922321	0.781541	0.812516	0.717032
193	0.924677	0.737219	0.736655	0.642587
194	0.913509	0.736853	0.779179	0.606895
195	0.890398	0.668317	0.650657	0.587828
196	0.915211	0.734644	0.740952	0.671569
197	0.961777	0.771731	0.771971	0.706129
198	0.96918	0.827409	0.855223	0.750332
199	0.980047	0.850614	0.922445	0.815029
200	0.943679	0.800834	0.857941	0.686633
201
202	0.920338	0.772834	0.832058	0.636005
203	0.950513	0.843643	0.87808	0.703605
204	0.928863	0.891931	0.856245	0.716426
205	0.992506	0.976774	0.934105	0.823935
206	1.0231	1.0716	0.938308	0.932239
207	0.940387		0.736288	0.874912
208	0.909536	0.997451	0.700112	0.791366
209	0.977127	1.01157	0.919355	0.882937
210	0.987676	0.937798	0.855653	0.680305
211	0.97907	0.938311	0.924949	0.716615
212	0.992753	0.950011	0.957759	0.727408
213	0.974624	0.889197	0.926083	0.710919
214	0.98584	0.940249	0.934074	0.725006
215	0.994511	0.998596	0.881501	0.754105
216	1.00238	0.999977	0.923193	0.850276
217	0.969914	0.894641	0.9402	0.650699
218
219	0.992812	0.987185	0.884329	0.767999
220	1.02597	1.02443	0.886983	0.889039
221	0.94488		0.93734	1.06278
222	0.957361	1.02392	0.907681	0.846076
223	0.964448	0.906203	0.93193	0.725652
224	0.958439	0.931978	0.837833	0.814236
225	0.933054	0.928641	0.969179	0.782544
226	0.934552	0.782634	0.812697	0.647981
227	0.948706	0.893487	0.889257	0.668522
228	1.00061	0.994492	0.929383	0.768041
229	0.978212	0.985303	0.859134	0.780927
230	0.948765	0.963767	0.807457	0.78294
231	0.943406	0.94462	0.917496	0.944985
232	0.90783	0.788315	0.843844	0.641589
233	0.960155	0.892465	0.886433	0.786509
234	0.956274	0.89875	0.849476	0.712559
235	0.960679	0.905271	0.881651	0.758713
236	0.912053	0.832513	0.829689	0.622741
237	0.947725	0.810894	0.871391	0.681153
238	0.944898	0.877778	0.919606	0.738978
239	0.912016	0.738535	0.824911	0.695017
240	0.905958	0.722948	0.824745	0.720736
241	0.895933	0.752639	0.769295	0.690765
242	0.862606	0.670337	0.701113	0.611286
243	0.840475	0.653494	0.631501	0.540356
244	0.858781	0.700605	0.653921	0.613722
245	0.914046	0.798987	0.803327	0.610335
246	0.91672	0.811578	0.791459	0.72324
247	0.892354	0.856515	0.776152	0.743556
248	0.933279	0.83293	0.842249	0.79107
249	0.930986	0.805149	0.847007	0.681401
250	0.927879	0.803037	0.830927	0.642871
251	0.918752	0.785816	0.833975	0.59393
252	0.902535	0.724635	0.805793	0.582579
253	0.878801	0.743726	0.78323	0.701343
254	0.892693	0.755319	0.687105	0.687158
255	0.973723	0.911821	0.947918	0.889374
256	0.897706	0.703066	0.845316	0.759166
257	0.912641	0.710097	0.616646	0.636027
258	0.904289	0.730328	0.755564	0.603853
259
260	0.939092	0.846451	0.860235	0.718519
261	0.926431	0.77669	0.820651	0.611842
262	0.88328	0.744766	0.760529	0.643039
263	0.890764	0.740364	0.763093	0.620929
264	0.907472	0.732313	0.776537	0.682656
265	0.950155	0.887164	0.881605	0.803843
266	0.941213	0.840635	0.863535	0.720419
267	0.87718	0.703683	0.755842	0.651189
268	0.936787	0.915445	0.856797	0.869576
269	0.871929	0.685027	0.724557	0.57344
270	0.866392	0.654908	0.633641	0.515307
271
272	0.891488	0.737797	0.71482	0.605528
273	0.892625	0.752184	0.750492	0.681345
274	0.901527	0.782423	0.785838	0.679725
275	0.855324	0.66758	0.708705	0.568553
276
277
278	0.891942	0.753495	0.784409	0.572126
279	0.881977	0.715465	0.749851	0.692074
280	0.866947	0.668408	0.712276	0.582254
281
282	0.913696	0.733323	0.680916	0.632306
283
284	0.906	0.802891	0.670465	0.763284
285	0.874862	0.723455	0.677483	0.60188
286
287	0.880727	0.669052	0.746471	0.602108
288	0.920354	0.750369	0.829224	0.60359
289	0.892577	0.751701	0.824219	0.642047
290
291	0.907879	0.812962	0.772419	0.740991
292	0.970162	0.833613	0.831396	0.632762
293	0.932012	0.864322	0.85285	0.749626
294	0.95087	0.820356	0.858208	0.670205
295	0.871441	0.716674	0.807878	0.598596
296	0.907512	0.785029	0.90765	0.671574
297	0.924021	0.821121	0.91552	0.718033
298	0.951816	0.856474	0.908074	0.665913
299	0.947872	0.849722	0.879381	0.656945
300	0.935975	0.864303	0.882687	0.675032
301	0.92315	0.818054	0.873259	0.614414
302	0.935071	0.842324	0.794289	0.713336
303	0.974987	0.858598	0.845513	0.7344
304	0.969918	0.880771	0.938399	0.778138
305	0.901333	0.776388	0.829786	0.610806
306	0.90569	0.776332	0.856143	0.63641
307	0.927269	0.788686	0.839134	0.601032
308	0.921401	0.76801	0.848664	0.599098
309	0.902086	0.730925	0.796476	0.627093
310	0.889666	0.67796	0.723997	0.581613
311
312	0.878068	0.66717	0.725243	0.564219
313	0.826347	0.672478	0.614499	0.627859
314	0.895672	0.806122	0.771079	0.667722
315	0.936218	0.806417	0.762485	0.685469
316	0.921468	0.815261	0.808742	0.65111
317	0.871055	0.736977	0.694574	0.622294
318	0.908278	0.852543	0.861562	0.829374
319	0.925826	0.76497	0.747721	0.641279
320	0.919309	0.764276	0.828047	0.670988
321	0.916986	0.761313	0.821526	0.573172
322	0.97773	0.845111	0.868248	0.812323
323	0.931496	0.833195	0.870251	0.64105
324	0.926692	0.825554	0.847665	0.71108
325	0.922356	0.753733	0.809996	0.617909
326	0.910426	0.750569	0.780918	0.656216
327	0.951618	0.981545	0.863234	1.08091
328	0.881544	1.01536	0.817723	0.867101
329	0.940026	0.805952	0.701535	0.699268
330	0.976491	0.942272	0.816421	0.726226
331	0.89955	0.810313	0.75167	0.640202
332	0.915162	0.78047	0.744198	0.601021
333	0.904519	0.759154	0.746543	0.641662
334	0.930341	0.926533	0.85512	0.760758
335	0.994629	0.975807	0.848756	0.824222
336	0.969367	0.973016	0.747607	0.9013
337	0.951452	0.91866	0.865889	0.793337
338	0.926616	0.788947	0.801429	0.626657
339
340	0.908526	0.821749	0.896249	0.765656
341	0.89023	0.712205	0.716861	0.608555
342
343	0.918076	0.729613	0.68141	0.623948
344	0.896132	0.739474	0.712378	0.711552
345	0.892935	0.740734	0.721398	0.672688
346	0.879781	0.729077	0.686881	0.62733
347	0.849483	0.674167	0.619875	0.55812
348	0.760629	0.539542	0.501959	0.461098
349	0.892259	0.71652	0.646238	0.654815
350	0.863837	0.708872	0.609686	0.639253
351	0.866849	0.7206	0.5995	0.565472
352	0.917206	0.747862	0.72013	0.610535
353	0.937938	0.797692	0.804146	0.731134
354	0.910672	0.760981	0.829259	0.787903
355	0.939821	0.822161	0.76905	0.655885
356	0.869757	0.651012	0.6555	0.530138
357	0.809932	0.573618	0.545537	0.468238
358	0.827256	0.592517	0.540644	0.509036
359	0.829104	0.527977	0.511938	0.473646
360	0.962092	0.848409	0.944943	0.85624
361	0.805162	0.626939	0.531778	0.498638
362	0.914174	0.756429	0.701629	0.669648
363
364	0.778508	0.583036	0.498387	0.530917
365
366	0.788873	0.516692	0.412208	0.354078
367	0.800723	0.562032	0.496962	0.482955
368
369
370	0.982022	0.847785	0.901324	0.898898
371	0.845462	0.607195	0.564864	0.580363
372	0.946547	0.813634	0.793887	0.743162
373	0.810617	0.551659	0.47745	0.47613
374
375
376
377
378
379
380
381
382
383
384
385
386
387	0.745968	0.464942	0.430945	0.459979
388
389
390	0.831492	0.61909	0.618346	0.555158
391
392
393
394	0.667678	0.421334	0.353866	0.360122
395
396
397	0.584855	0.402845	0.292077	0.323406
398
399
400	0.670978	0.427592	0.212636	0.319142
401	0.772338	0.415727	0.361	0.48795
402	0.66402	0.274924	0.155423	0.217403
403	0.800677	0.551871	0.570986	0.530054
404	0.519103	0.322965	0.209884	0.222182
405	0.617924	0.180041	0.085363	0.233095
406
407
408
409	0.694419	0.339322	0.244268	0.236454
410
411	0.782614	0.569735	0.557777	0.534188
412	0.786072	0.625028	0.642682	0.64335
413	0.667073	0.415848	0.363102	0.368505
414	0.656676	0.396513	0.290257	0.325688
415	0.72323	0.423023	0.401707	0.362272
416	0.715447	0.503466	0.457792	0.445247
417	0.788198	0.588336	0.5757	0.532037
418	0.780127	0.622954	0.609192	0.574598
419	0.800511	0.60768	0.572586	0.538422
420	0.804966	0.578926	0.577912	0.54449
421	0.748193	0.518716	0.525512	0.454977
422
423	0.914557	0.78826	0.649788	0.651527
424	0.864604	0.753327	0.692538	0.673347
425	0.968801	0.896601	0.879302	1.11032
426	0.763001	0.571284	0.595239	0.520305
427
428	0.78852	0.599865	0.518215	0.556844
429	0.797192	0.581636	0.532855	0.531
430	0.872989	0.716206	0.74056	0.58695
431
432	0.792502	0.589492	0.566934	0.535333
433	0.811217	0.711177	0.53036	0.529424
434	0.764265	0.625137	0.543759	0.526847
435	0.635612	0.371348	0.294757	0.309722
436
437	0.585565	0.397382	0.270886	0.291254
438
439
440
441	0.770917	0.577465	0.502417	0.540681
442
443
444	0.682499		0.724013	0.377274
445	0.660198	0.440175	0.374396	0.405328
446	0.922314	0.855525	0.84518	0.827954
447	0.887475	0.672195	0.62053	0.623255
448	0.690504	0.3943	0.377642	0.336343
449
450	0.707938	0.531137	0.405434	0.516192
451	0.844674	0.691119	0.734486	0.640204
452
453
454
455
456
457
458
459
460
461
462
463
464
465
466
467
468
469
470
471
472
473
474	0.919197	0.748341	0.804123	0.680307
475	0.982133	0.832564	0.856274	0.688838
476	0.865656	0.668158	0.657987	0.540495
477	0.921747	0.725072	0.729654	0.592405
478	0.87637	0.697144	0.692295	0.563084
479	0.981373	0.918469	1.08052	0.910377
480	0.795997	0.501635	0.433674	0.4228
481
482
483	0.72298	0.483529	0.401954	0.41812
484	0.829185	0.631011	0.554811	0.574322
485	0.625083	0.588015	0.192723	0.330648
486	0.81778	0.604098	0.681152	0.66583
487
488
489	0.878869	0.65226	0.558762	0.536477
490	0.91679	0.70466	0.626396	0.575685
491	0.919624	0.723455	0.716591	0.669653
492	0.859155	0.636268	0.609207	0.535661
493	0.948351	0.818013	0.714626	0.694939
494	0.918807	0.709859	0.654981	0.581127
495	0.892729	0.663502	0.624932	0.550849
496	0.924759	0.747678	0.750007	0.696212
497	0.885359	0.722533	0.685103	0.58947
498	0.838022	0.674792	0.633933	0.555927
499	0.829207	0.549567	0.428428	0.438795
500	0.801213	0.489599	0.430427	0.407429
501
502	0.896141	0.778304	0.805558	0.71157
503	0.781304	0.492705	0.405333	0.340832
504	0.797702	0.647038	0.646491	0.730497
505	0.561847	0.416544	0.0728374	0.0669952
506
507	0.682319	0.483231	0.256247	0.368003
508	0.798656	0.503032	0.371956	0.475292
509	0.960304	0.84171	0.80834	0.853686
510
511	0.842029	0.688314	0.511478	0.572713
512	1.00688	0.911251	0.903197	0.877759
513	0.768502	0.461513	0.448495	0.442138
514
515
516
517	0.823718	0.701995	0.588816	0.607799
518
519	0.842137	0.790188	0.795397	0.8215
520	0.805419	0.63739	0.696309	0.624088
521	0.975177	0.899071	0.840849	0.85423
522	0.859826	0.641729	0.579085	0.646053
523	0.904717	0.62973	0.612928	0.595356
524	0.99397	0.920969	0.918984	0.964124
525
526	0.900007	0.660563	0.622819	0.587182
527
528
529	0.579161	0.348942	0.0677584	0.278469
530
531	0.718591	0.495065	0.391784	0.394615
532	0.79194	0.617343	0.584518	0.613839
533
534	0.761303	0.464466	0.365365	0.282688
535
536	0.852877	0.518616	0.55587	0.546897
537	0.695448	0.496411	0.316591	0.31822
538	0.89381	0.713802	0.720299	0.658364
539
540	0.864262	0.648201	0.715035	0.643558
541	0.865963	0.695483	0.73174	0.71786
542	0.841621	0.633712	0.59265	0.588166
543	0.791425	0.534673	0.459201	0.441869
544	0.844384	0.617704	0.569936	0.548123
545	1.00542	0.906786	0.968576	0.980762
546	0.894511	0.699662	0.67578	0.663537
547	0.718575	0.474742	0.38961	0.430515
548	0.826193	0.841009	0.797332	0.804728
549	0.712244	0.484687	0.360029	0.408558
550
551	0.890194	0.738377	0.723199	0.729873
552
553	0.742825	0.474548	0.409151	0.432484
554	0.674739	0.46338	0.245029	0.359627
555
556
557
558	0.870457	0.617876	0.483412	0.462358

## Sheet: F1E
Tc vs NaCl
[NaCl] (mM)	Tc (ºC) repetition1	Tc (ºC) repetition2	Tc (ºC) repetition3	Mean Tc (ºC)	SD Tc (ºC)
250	43.359	38.2727	37.1616	39.5977	2.698
500	25.8331	24.3046	23.3329	24.4902	1.0291
750	15.5467	16.5941	15.141	15.7606	0.612182

## Sheet: F1F
Turbidity
Temperature (ºC)	50uM WT_927_500mM NaCl		50uM ALL Y-S 500mM NaCl		150uM ALL Y-S 1000mM NaCl		50uM N-term Y-S 500mM NaCl		150uM N-term Y-S 1000mM NaCl		50uM C-term Y-S 500mM NaCl		150uM C-term Y-S 1000mM NaCl
19.97	0.00402546	0.00089803	0.00033641	0.00113686	-0.0001334	0.00073543	-0.0071303	0.0080429	0.00171298	0.00152234	-0.0013498	0.00020722	0.00202875	0.00176479
20.47	0.00580822	0.00106724	0.00041294	0.00164284	-4.748e-05	0.00132902	-0.0072636	0.00962501	0.00214263	0.0013861	-0.0021236	0.00068129	0.00354691	0.00262112
20.92	0.00749367	0.00136252	0.00102178	0.00202457	6.8034e-05	0.00171643	-0.0083087	0.0108397	0.00278017	0.00202426	-0.0026691	0.00088831	0.00472978	0.00304424
21.42	0.0087618	0.00158456	0.0012771	0.0023428	0.00060052	0.00185356	-0.0075525	0.0114103	0.00316411	0.00244225	-0.0029913	0.00140295	0.00578994	0.00349856
22.01	0.00969693	0.00204398	0.00128029	0.0024921	0.00116792	0.00154875	-0.0072867	0.0123262	0.00378937	0.0032328	-0.0035033	0.00203646	0.00725692	0.00389927
22.57	0.0113838	0.00230635	0.00185353	0.00267828	0.00149686	0.00165561	-0.0066672	0.0121489	0.00437719	0.00327299	-0.0037903	0.00240135	0.00859222	0.00406486
23.07	0.0125247	0.00266479	0.00236996	0.00309496	0.00198111	0.00161229	-0.0061468	0.0125013	0.00517597	0.00373601	-0.0040312	0.00240553	0.0100708	0.00464685
23.52	0.0141968	0.00286346	0.00273077	0.00364184	0.00256181	0.00180759	-0.0053296	0.0131949	0.00621589	0.00445132	-0.0039889	0.00256114	0.0116328	0.00508517
23.97	0.0159214	0.00310063	0.00308251	0.00373534	0.00298907	0.00159313	-0.0051948	0.0143961	0.00708147	0.00503623	-0.0041487	0.00258892	0.0132359	0.00551162
24.53	0.0173972	0.00351932	0.00356529	0.00427862	0.0034575	0.00123209	-0.0040558	0.0152151	0.00772425	0.0048705	-0.0038439	0.00269585	0.0148684	0.00577494
25.02	0.0191093	0.00361024	0.00386569	0.00458877	0.00456119	0.00116535	-0.0026871	0.015445	0.00795396	0.00479825	-0.0036909	0.00275925	0.0165199	0.00619644
25.62	0.0207698	0.00395143	0.00407267	0.00470276	0.00500584	0.00107566	-0.002091	0.0156976	0.00863736	0.00493836	-0.0034777	0.00264888	0.0170031	0.00526081
26.07	0.0226058	0.00434712	0.0047199	0.00538894	0.00523607	0.00134164	-0.0014207	0.0168896	0.00987189	0.00600796	-0.0034355	0.00262638	0.0189694	0.00583892
26.52	0.0246716	0.00463821	0.00534864	0.0055227	0.00565817	0.00129606	-0.0007235	0.0175859	0.0101728	0.00536905	-0.0031091	0.00244796	0.0207832	0.00601612
27.07	0.0266635	0.00515467	0.00579766	0.0059319	0.00626561	0.0015797	0.00069839	0.017905	0.0112189	0.00632339	-0.0027798	0.00224647	0.0230065	0.00635908
27.57	0.0290601	0.00574715	0.00632209	0.00627955	0.00667194	0.00155829	0.00249665	0.0179655	0.011757	0.00628897	-0.0024716	0.00214828	0.0250641	0.00674471
28.07	0.0315089	0.00613789	0.00686699	0.00700316	0.00716657	0.00145361	0.00367456	0.0179796	0.0132243	0.00762751	-0.0020716	0.00194923	0.0274752	0.00707963
28.57	0.0340288	0.00670887	0.00759024	0.00734696	0.00771406	0.00168619	0.00502701	0.0182659	0.0142901	0.00751033	-0.0022109	0.00227844	0.0303472	0.0074215
29.12	0.0370595	0.00723771	0.00795179	0.00725338	0.00815982	0.00178665	0.00662157	0.0184313	0.0149502	0.00781305	-0.0017293	0.00205351	0.0335376	0.00740288
29.53	0.0398469	0.00777087	0.0084972	0.00765343	0.00870226	0.00175545	0.0078419	0.0186017	0.0160524	0.00791144	-0.0014048	0.00172549	0.0385972	0.00614111
30.07	0.0433911	0.00846862	0.00921514	0.00797199	0.00923106	0.00175821	0.00920683	0.018755	0.017409	0.00857264	-0.0010825	0.00151841	0.0821177	0.0270436
30.52	0.0473441	0.00899056	0.00986222	0.00857169	0.00981522	0.00195641	0.0103884	0.0187983	0.0186371	0.00851036	-0.0005516	0.0012883	0.55104	0.323103
31.07	0.051498	0.0099807	0.0106195	0.00882871	0.0101778	0.00232039	0.0120212	0.01943	0.0190519	0.00825338	-0.0001076	0.00110767	1.24929	0.37105
31.57	0.0567738	0.0110251	0.0111411	0.00953522	0.0106213	0.0024343	0.0131301	0.0196578	0.0200479	0.00834899	0.00012945	0.00071971	1.77478	0.131994
32.07	0.0632745	0.0123015	0.011808	0.0101324	0.0110293	0.00243457	0.0142898	0.0200782	0.021867	0.0086863	0.00079508	0.00056712	2.00972	0.0795239
32.52	0.0733141	0.0133947	0.013147	0.010916	0.0115676	0.00249366	0.0156974	0.0206102	0.022791	0.00900002	0.00122353	0.00063226	2.17113	0.0581572
33.12	0.091781	0.0155683	0.0136282	0.0110879	0.0121568	0.00265284	0.0168951	0.0213015	0.0243788	0.00955939	-0.0001553	0.00210498	2.28844	0.0474712
33.62	0.158547	0.0417582	0.0146812	0.0118374	0.0126867	0.00270171	0.018205	0.0218482	0.0252644	0.00931595	0.00021079	0.00183334	2.38598	0.0383371
34.02	0.307259	0.104019	0.0154581	0.01196	0.0129726	0.00286806	0.0201521	0.0221241	0.025321	0.00865245	0.0007895	0.00157505	2.47	0.0307422
34.52	0.59769	0.134897	0.0165733	0.0127053	0.0137381	0.00311415	0.0214959	0.0226053	0.0264099	0.00881867	0.00121148	0.00166275	2.53718	0.0275319
35.02	0.90977	0.0853616	0.0122954	0.00806659	0.014359	0.00299763	0.0230501	0.0228126	0.0276265	0.00937211	0.00169911	0.00141691	2.59482	0.0233285
35.52	1.11319	0.0531089	0.0134487	0.00864559	0.0148375	0.00332708	0.0243338	0.0231891	0.0283458	0.00901592	0.00233032	0.00127426	2.64662	0.0204611
36.07	1.25226	0.0388237	0.0139143	0.00901771	0.0152626	0.00332853	0.0260419	0.0234403	0.0299352	0.00922616	0.00257811	0.00115407	2.6909	0.0208307
36.57	1.35358	0.0304006	0.0146032	0.00947929	0.0158775	0.00327945	0.0279932	0.0240966	0.0314494	0.0100231	0.00322925	0.00124358	2.72849	0.0156002
37.02	1.43571	0.0252226	0.0158485	0.009852	0.0163511	0.00358709	0.0295949	0.0244898	0.0322295	0.00991329	0.00321523	0.00044393	2.76378	0.0171637
37.57	1.50874	0.0188675	0.016977	0.0103983	0.0167955	0.00359597	0.0313601	0.0244936	0.0337848	0.0105144	0.00371193	0.00014896	2.7917	0.0113385
38.12	1.57065	0.0162193	0.017655	0.0107295	0.0175877	0.00362798	0.0331372	0.0249832	0.0354068	0.0109382	0.00417536	0.00013148	2.81931	0.00971746
38.62	1.62293	0.0136408	0.0179292	0.010351	0.0177711	0.00369098	0.0351887	0.0252516	0.0367424	0.0106192	0.00481903	0.00027786	2.83799	0.0123014
39.02	1.66794	0.00992763	0.0188226	0.010822	0.0183275	0.00389519	0.0372355	0.0254525	0.0380509	0.010885	0.00539854	0.00022076	2.8525	0.0080092
39.57	1.70666	0.0084625	0.0201462	0.0113535	0.0187612	0.00402544	0.0394118	0.0257936	0.0395512	0.0108643	0.00602338	0.00061689	2.8761	0.0081147
40.02	1.74065	0.00672842	0.0211208	0.0118335	0.0194326	0.00416931	0.0410705	0.0258218	0.0403191	0.0105632	0.00666947	0.00062218	2.89014	0.00517213
40.57	1.77159	0.006187	0.021803	0.01247	0.0198387	0.00425755	0.0438562	0.0263078	0.0430105	0.0112693	0.00738369	0.00094844	2.90027	0.00307322
41.07	1.79855	0.00562339	0.0230794	0.0130198	0.0203272	0.0040811	0.0458957	0.0265468	0.0452042	0.0111745	0.00785515	0.00102777	2.91279	0.00642776
41.54	1.82387	0.0048231	0.023548	0.013906	0.0207979	0.00427391	0.0479065	0.0267641	0.0476988	0.0113091	0.00860228	0.00123273	2.92135	0.0026176
42.12	1.84466	0.00344119	0.0246497	0.0146916	0.0216852	0.00456145	0.0503062	0.0270223	0.0521225	0.0111669	0.0093463	0.00134226	2.92436	0.00406349
42.57	1.8628	0.00277042	0.0260821	0.0152282	0.0222373	0.00428859	0.053381	0.0270682	0.0587292	0.0109339	0.0102121	0.00158209	2.93224	0.00061882
43.07	1.88044	0.00242304	0.0269254	0.0156439	0.0229114	0.00437785	0.0558821	0.0269654	0.057168	0.00264032	0.0108407	0.0017682	2.93589	0.00258088
43.57	1.89556	0.00253307	0.0279231	0.0158123	0.0235662	0.00452962	0.058206	0.0271269	0.0748882	0.00258127	0.0116256	0.00182972	2.93327	0.00247443
44.12	1.90928	0.00287918	0.0291941	0.0166545	0.0243463	0.00472683	0.0583989	0.0255688	0.0992103	0.00262646	0.0123489	0.00189525	2.93172	0.00325716
44.62	1.92055	0.00367849	0.030956	0.0170106	0.024866	0.00480962	0.0611549	0.0257032	0.1287	0.00282491	0.013315	0.00231643	2.92778	0.00280786
45.07	1.92986	0.004916	0.0316086	0.017781	0.0256471	0.00496174	0.0615507	0.0280965	0.162574	0.00361573	0.0143538	0.00201032	2.91928	0.00307179
45.62	1.93771	0.00589229	0.0330734	0.0181272	0.0264688	0.00497046	0.039039	0.0300451	0.198757	0.0053521	0.015358	0.0024046	2.90798	0.00576127
46.07	1.9454	0.00694542	0.0341982	0.0185373	0.0273235	0.00525086	0.0416702	0.0304672	0.234845	0.00532402	0.0164015	0.00224838	2.89633	0.0107099
46.62	1.95126	0.00915154	0.0359183	0.018997	0.0267907	0.00407054	0.0447994	0.0314433	0.271447	0.00518337	0.0177363	0.00216046	2.87328	0.0159987
47.07	1.95528	0.010251	0.0370818	0.0194752	0.0275965	0.00422569	0.0476435	0.0319098	0.30835	0.00517665	0.0191055	0.00162337	2.85046	0.0152423
47.57	1.95813	0.0108168	0.0382492	0.019803	0.0283368	0.00413359	0.0509224	0.0327499	0.344411	0.00712399	0.0208804	0.0010084	2.82096	0.0233725
48.12	1.95843	0.0106004	0.0393411	0.0202813	0.0291688	0.00411669	0.0549567	0.033825	0.379765	0.00804465	0.0219743	0.00150192	2.78966	0.026248
48.57	1.9574	0.0119778	0.0400884	0.0200107	0.0302818	0.0039141	0.0584309	0.0344744	0.415619	0.00831477	0.0249768	0.00337083	2.74866	0.0309638
49.07	1.95838	0.0134619	0.0420976	0.0204814	0.031057	0.00393866	0.0624321	0.0352119	0.450656	0.00851169	0.0286668	0.00593501	2.70728	0.0374758
49.56	1.94945	0.0158736	0.0429364	0.0208794	0.0320438	0.00397359	0.0670694	0.0362681	0.486557	0.00840385	0.0329025	0.00957671	2.66068	0.0360914
50.07	1.94387	0.0175781	0.0405615	0.022749	0.032984	0.00408475	0.0525243	0.017692	0.522187	0.00883481	0.0379559	0.0137469	2.6126	0.0446181
50.62	1.93494	0.020628	0.0426598	0.0239575	0.0340804	0.00419093	0.0577216	0.0184611	0.556413	0.00997734	0.0434241	0.0180702	2.55908	0.0467162
51.12	1.92612	0.0220495	0.044865	0.0252499	0.0352558	0.00426058	0.0630618	0.0189227	0.590852	0.010725	0.049149	0.0227356	2.50422	0.0444115
51.57	1.91399	0.0253978	0.0462344	0.0254397	0.0364616	0.00409952	0.0689765	0.0197751	0.626256	0.010959	0.0553813	0.0280399	2.43864	0.0444453
52.12	1.90277	0.0265594	0.0481314	0.0261422	0.0376745	0.00419435	0.0751305	0.0201417	0.660281	0.0101802	0.0614552	0.0329856	2.37343	0.0323782
52.57	1.89692	0.0280521	0.0503224	0.027127	0.0394065	0.00445595	0.0818529	0.0210636	0.691787	0.0105026	0.067591	0.0382907	2.30924	0.02854
53.17	1.88851	0.0279941	0.0520138	0.0276356	0.0409559	0.00413905	0.0889633	0.0219771	0.723882	0.0103838	0.0739527	0.0436967	2.23373	0.019352
53.57	1.8686	0.0331576	0.0534702	0.0278879	0.0423047	0.00436274	0.0971587	0.0229569	0.752674	0.0103877	0.0805495	0.048452	2.17272	0.0347918
54.06	1.86112	0.0313484	0.0560442	0.0292337	0.0439979	0.0043709	0.106771	0.023293	0.779317	0.010706	0.0866167	0.0533474	2.13494	0.035959
54.62	1.84857	0.0303722	0.0588424	0.0304453	0.0459827	0.00442686	0.116152	0.0238302	0.803378	0.0121948	0.0925054	0.0581791	2.10635	0.043737
55.12	1.8215	0.0289737	0.0608641	0.0313928	0.0478911	0.00418994	0.125285	0.0244631	0.829244	0.0109365	0.0985892	0.0623329	2.04839	0.0390873
55.57	1.80561	0.027276	0.0630077	0.032361	0.0458447	1.5963e-06	0.134415	0.0240024	0.851803	0.0101733	0.104498	0.0661678	1.97883	0.0173576
56.12	1.78287	0.0309424	0.0657196	0.0335209	0.0481829	0.00015927	0.143985	0.0233296	0.87382	0.00941181	0.110732	0.0691316	1.91836	0.00862372
56.57	1.76863	0.0295747	0.0683426	0.0351691	0.0508191	0.00029079	0.154	0.0228109	0.894067	0.0100843	0.117045	0.07115	1.84275	0.00329268
57.12	1.74804	0.029811	0.0707877	0.0361925	0.0537223	0.00033403	0.165438	0.0219101	0.91435	0.00772241	0.124482	0.0723546	1.83636	0.0173762
57.57	1.7262	0.0303731	0.0737535	0.0380566	0.0566014	0.00058026	0.174687	0.0217934	0.931871	0.00898069	0.131555	0.0734203	1.81297	0.00732523
58.08	1.69986	0.0288362	0.0773272	0.0403609	0.0600933	0.00103955	0.184135	0.0218702	0.946844	0.0115389	0.136733	0.0755852	1.7771	0.0071795
58.62	1.68144	0.0231029	0.0810855	0.0428857	0.0639745	0.00096637	0.195215	0.0212091	0.9633	0.0116497	0.141495	0.0779753	1.74577	0.0182919
59.07	1.66487	0.0235547	0.0846265	0.0455126	0.0682867	0.00119999	0.204524	0.0213084	0.978976	0.0108787	0.14572	0.0809579	1.70507	0.00466573
59.47	1.643	0.0110646	0.087347	0.0467977	0.0727797	0.00151093	0.213843	0.0206903	0.9914	0.0105149	0.15009	0.0833169	1.67984	0.0221459
59.92	1.61163	0.00939316	0.0893204	0.0476583	0.0830728	0.00248159	0.223003	0.0211839	1.01259	0.0101504	0.154275	0.0858344	1.58526	0.0232413

## Sheet: F1H
Intensity AR AD in droplets
MED1			RNAPII
WT*	22YtoS		WT*	22YtoS
152.12	104.47		87.22	47.8
89.46	90.31		92.46	22.17
115.98	114.28		58.57	6.13
96.27	50.51		72.14	23.29
93.98	78.2		84.53	25.62
79.68	98.15		87.51	63.42
130.99	66.86		78.2	31.49
99.86	131.13		106.88	24.7
109.9	87.16		83.94	1.04
72.34	170.52		112.55	7.23
176.65	49.92		64.84	0
110.14	58.97		57.84	64.39
91.07	78.81		100.69	1.91
71.6	99.44		83.45	42.7
113.28	57.31		97.89	27.11
62.11	4.17		86.29	25.78
52.31	145.46		97.83	48.98
82.41	60.95		71.31	79.99
53.97	58.78		117.03	41.27
85.08	75.99		70.96	40.22
92.35	157.55		49.57	33.55
56.33	45.62		63.42	45.1
77.05	95.2		43.07	33.64
90.54	56.53		18.83	20.61
80.39	49.48		103.17	35.38
58.5	46.29		55.63	39.97
59.04	78.79		108.18	46.04
134.85	11.53		28.9	1.73
108.63	163.95		71.25	28.5
103.79	81.27		66.31	42.83
88.03	63.19		45.82	23.89
94.23	69.69		60.36	44.46
110.93	75.15		53.58	57.71
123.83	101.6		87.91	84.43
110.45	126.56		91.9	0.12
47.15	106.97		61.84	0.21
129.49	42.35		95.06	29
63.1	84.71		75.85	35.42
141.8	123.85		52.48	34.62
99.59	81.46		39.63	46.37
148.65	43.83		73.8	32.9
111.85	81.22		65.28	3.02
93.63	65.23		47.42	31.1
65.33	66.23		65.79	49.71
79.34	107.8		65.11	65.41
132.99	47.91		70.71	98.59
65.29	145.98		56.77	39.83
112.57	116.18		89.84	24.85
104.73	78.63		83.39	0.13
80.83	70.19		45.14	40.25
88.1	112.09		70.01	40.44
119.75	103.13		44.02	48.13
124.03	128.63		70.61	0
162.19	50.47		67.03	42.4
59.27	56.12		55.67	6.06
61.35	87.54		25.05	46.13
46.11	67.93		35	27.44
139.68	136.95		63.48	3.76
86.84	57.58		32.9	33.69
74.32	93.77		115.32	25.58
139.06	68.12		74.67	33.13
57.42	67.58		0.6	32.25
78.65	50		96.3	34.3
106.62	47.67		67.9	48.17
137.72	74.12		79.49	36.72
77.52	47.2		27.82	20.62
99.04	90.2		44.67	73.25
122.63	60.74		61.94	24.31
56.58	104.29		89.99	71.59
97.49	167.96		53.39	2.17
113.43	59.86		72.81	5.35
156.24	84.08		24.64	30.33
78.38	158.16		6	9.63
69.89	111.61		101.39	36.44
118.27	69.22		96.99	33.16
55.96	47.9		135	48.61
66.09	100.87		135.52	31
120.86	48		51.22	28.31
51.86	147.06		93.34	61.26
86.92	49.15		78.82	58.02
126.16	123.86		92.8	83.67
128.82	17.14		64.7	4.68
83.6	81.77		104.59	70.97
101.71	104.79		51.41	42.59
121.26	91.15		58.36	21.93
139.79	28.43		52.04	58.06
64.66	92.59		52.3	41.68
52	137.61		70.5	37.48
143.09	82.57		102.47	32.85
71.1	63.56		27.82	2.62
138.26	103.82		79.32	64.65
57.13	94.21		127.58	87.17
105.05	171.25		46.42	55.41
67.98	137.47		74.72	9.6
145.84	50.07		96.53	17.23
105.55	173.18		92.48	8.14
67.38	49.93		50.87	6.29
173.82	117.19		96.38	46.84
109.96	50.73		98.9	11.73
97.84	53.11		26.28	9.44
123.52	69.81		87.92	9.47
161.92	107.1		50.8	10.81
115.98	96.44		93.39	10.29
101.82	50.68		84.22	18.19
76.15	73.8		50.29	4.45
90.04	98.27		24.83	0.79
72.41	44.07		85.46	10.87
94.59	50.57		65.24	26.11
100.36	63.79		26.42	4.85
116.24	47.82		65.44	24.97
119.1	76.86		104.08	8.5
114.37	37.69		116.41	29.99
89.6	78.96		72.75	13.74
137.04	75.59		90.31	0
79.25	96.01		30.23	5.92
153.52	61.79		98.24	26.58
79.97	55.02		67.71	9.34
88.09	152.54		122.19	8.73
71.29	67.3		132.02	17.22
56.79	83.89		44.87	9.12
110.66	67.67		54.07	23.79
66.83	89.68		53.6	25.64
29.98	118.39		62.97	18.49
139.35	36.05		42.21	11.41
134.57	142.79		68.94	25.62
122.82	58.04		91.75	7.26
77.94	58.43		97.49	9
91.23	138.59		96.2	21.86
58.33	136.75		102.94	13.32
128.34	95.2		114.94	0.38
77.14	47.62		25.73	3.26
138.98	67.44		68.44	32.61
63.15	128.77		71.16	7.38
144.93	130.7		67.07	8.94
112.42	119.71		55.73	29.87
61.77	123.35		48.65	32.78
129.66	67.44		47.12	23.06
72.87	85.99		99.96	22.73
124.97	141.25		183.64	19.83
102.32	172.47		13.69	12.4
140.09	62.67		37.62	49.63
144.37	82.36		64.25	19.03
135.3	46.14		90.62	17
115.95	123.44		68.76	46.57
138.77	41.5		20.93	13.21
45.17	125.46		75.72	23.42
119.24	74.71		68.22	9.3
65.97	94.94		41.82	6.29
138.92	148.96		83.93	6.25
16.76	120.79		57.88	12.13
130.4	135.38		46.52	25.22
133.7	60.56		59.52	16.82
147.98	126.61		62.6	13.6
59.88	74.36		34.25	20.86
62.06	44.78		114.68	36.18
139.03	44.78		53.14	27.82
135.07	54.04		90.68	19.75
67.03	96.4		31.83	18.62
166.24	72.32		90.76	21.77
117.1	71.74		64.54	13.56
82.63	95.55		38.57	9.38
53	93.17		97.55	22.98
93.29	68.44		48.4	24.89
168.27	121.89		35.44	30.85
137.33	131.78		107.34	21.07
122.73	62.02		106.68	28.89
107.16	101.15		75.12	24.19
64.86	68.05		74.05	12.71
56.11	63.52		27.6	15.16
59.73	98.38		89.57	35.48
106.94	71.55		90.88	16
78.89	7.55		47.62	7.88
88.9	122.85		67.13	12.08
111.23	92.6		92.55	12.1
107.86	97.68		49.88	27.99
116.36	104.64		127.34	19.54
145.36	64.74		98.23	0
97.77	44.57		80.55	15.19
93.62	98.83		94.38	12.67
126.69	93.82		78.35	9.77
113.6	68.16		95.07	19.44
109.55	80.76		47.13	16.92
64.93	45.73		51.88	20.8
164.42	58.61		26.9	19.38
97.27	64.86		25.56	12.36
57.56	102.54		77.24
51.5	112.14		71.41
88.08	83.46		99.33
59.48	63.6		86.02
58.38	111.37		97.29
112.03	45.21		51.96
87.09	132.23		97.42
106.39	52.4		77.78
64.62	60.82		66.98
75.2	63.65		72.9
99.04	101.59		85.95
68.66	75.18		108.96
92.87	54.84		56.1
115.87	153.89		116.41
113.15	103.6		44.4
84.8	50.68		22.31
103.45	5.14		86.6
113.53	72.49		64.39
124.98	77.06		97.13
59.5	104.59		70.18
89.36	99.42		59.67
81.6	54.6		59.87
106.37	71.96		104.47
75.88	51.14		50.02
84.3	75.64		59.28
91.2	108.25		121.08
75.73	146.94		46.88
60.68	46		42.78
59.07	52.53		47.16
76.96	67.45		80.68
59.38	129.35		51.81
140.01	81.18		60.55
119.74	56.62		109.71
53.5	95.71		42.32
107.9	138.94		106.47
80.24	11.6		64.44
120.19	64.7		37.88
62.16	74.11		29.5
106.49	66.56		67.32
96.23	80.93		48.48
105.39	123.43		104.29
116.36	97.11		92.03
51.8	75.02		138.32
59.18	95.26		102.03
32.96	107.26		69.66
39.02	65.95		112.11
165.1	130.34		128.41
111.94	115.17		27.36
108.18	120.29		101.75
94.07	90.73		75.53
98.02	118.32		74.46
108.33	63.32		101.3
82.02	43.56		30.4
25.7	97.77		32.65
57.24	81.49		96.37
59.69	93.28		69.51
56.17	55.76		61.93
31.91	110.26		107.52
93.8	64.22		104.29
151.22	59.13		120
116.24	87		119.29
130.35	123.72		40.56
135.37	91.92		38.67
52.5	103.06		75.65
43.76	104.46		68.51
100.75	57		12.15
79.07	115.64		123.82
103.11	110.76		64.35
149.82	87.4		59.69
99.12	55.11		6
104.85	110.83		51.34
104.37	54.89		74.52
75.76	50.95		93.66
70.14	77.36		74.68
114.59	104.81		31
94.81	82.08		40.43
121.17	47.17		84
80.51	116.52		83.99
68.49	89.76		38
83.24	135.24		95.49
124.4	94.17		34.58
128.58	98.74		95.44
131.7	30.83		50.95
59.72	62.56		74.19
84.95	52.92		55.46
76.6	73.39		49.1
83.23	49.44		114.05
71.31	52.81		69.61
82.25	105.05		56.58
83.19	31.56		43.86
43.22	122.65		42.07
96.69	59.34		33.81
118.38	139.27		43.8
117.81	81.3		79.39
131.15	128.53		37.99
118.24	128.42		122.52
144.52	83.06		88.2
52.37	149.91		28.1
112.8	61.39		110.72
63.3	91.8		47.84
11.44	50.93		45.85
132.7	109.26		112.97
88.34	74.35		72.83
137.57	114.89		94.24
47	81.1		76.36
143.59	68.23		54.35
138.08	105.97		46.35
47.45	57.15		53.57
80.68	92.87		71.26
89.24	72.62		41.6
121.42	119.84		60.51
75.5	112.12		106.25
114.7	142.37		44.25
123.89	52.74		54.51
70.79	62.55		23.58
157.33	73.94		41
61.11	154.72		50.93
130.86	64.68		52.88
87.95	108.88		71.76
46.71	67.3		100.29
145.04	105.89		43.16
129.24	84.11		40.29
152.7	56.79		94.33
110.59	101.68		86.97
80.72	79.62		56.26
60.61	107.6		82.58
117.33	54.62		84.3
104.71	55.38		87.98
124.3	61.29		36.58
142.23	76.63		86.84
117.35	100.27		102.12
151.27	117.82		87.01
113.84	114.93		71.39
105.91	77.45		42.03
140.97	137.18		31.31
83.36	116.34		89.46
103.91	58.97		71.92
133.86	89.98		102.84
118.61	86.9		80.02
58.07	102.86		47.33
48.11	3.6		103.75
135.85	64.81		3.5
111.27	122.4		70.68
115.88	94.26		75.42
110.8	48.36		91.79
106.7	116.26		33.71
83.49	66.5		31.5
63.68	115.67		76.27
28.35	101.38		73.95
30.39	72.92		72.59
126.52	51.65		82.49
53.02	102.74		45.21
131.43	83.55		53.84
54.84	121.08		42.67
141.97	106.63		55.43
163.82	63.96		99.64
162.79	88.68		44.89
73.38	83.28		80.9
126.5	116.89		29.55
58.94	100.41		22.4
99.26	79.54		65.19
46.33	95.34		105.65
86.33	123.84		78.35
55.43	105.94		113.39
73.75	97.16		82.66
119.23	44.56		91.57
154.86	81.97		54.56
139.73	112.97		62.21
82.99	60		62.63
56.35	58.58		24.31
117.1	57.54		93.35
52.76	115.19		56.05
52.96	111.45		64.15
66.85	16.59		61.71
114.2	3.86		55.24
75.62	123.03		49.44
72.93	166.58		68.7
105.17	72.36		58.73
122.17	110.05		51.45
130.11	80.49		31.22
159.08	42.92		42.1
60.19	74.56		19.71
143.33	75.41		45.02
97.21	75.58		64.1
78.33	73.89		44.32
143.63	77.6		65.03
65.78	87.68		38.42
147.58	130.2		27.57
92.48	81		78.31
69.38	109.3		60.51
139.63	99.66		40.33
48.5	69.43		103.61
93.99	104.98		71.22
87.81	16.25		46.48
115.25	62.12		102.69
84.85	136.63		102.56
68.77	92.39		92.86
61.27	61.25		114.31
161.01	64.78		89.94
69.87	40.45		71.5
61.27			76.35
118.29			98.34
161.7			96.69
56.44			50.05
150.62			83.08
114.33			76.63
76.28			67.61
64.96			85.67
72.62			122.33
52.16			67.06
135.21			76.87
127.48			111.11
132.05			63.04
90.5			34.73
115.21			106.17
42.29			144.52
98.91			92.85
50.33			72.43
115.03			57.48
123.25			96.53
49.43			66.94
52.48			64.35
67.82			71.75
111.94			97.84
152.07			38.38
160.98			13.38
17.77			53.33
83.56			127.38
144.77			86.87
143.22			86.31
94.16			100.26
96.52			69.65
110.09			43
115.03			103.96
60.06			41.78
148.94			38.92
139.97			86.79
119.89			71.38
159.8			174.29
69.77			50.81
95.67			101.72
113.14			42.84
80.08			83.53
123.51			51.91
98.95			26.65
105.35			79.82
61.83			75.2
81.29			70.01
101.87			78.12
80.63			61.8
90.83			24.08
140.55			8.36
86.49			108.18
54.76			100.88
139.01			90.97
141.25			30.18
124.18			133.1
78.41			94.87
126.05			42.46
135.57			117.59
45.4			38.25
122.88			81.43
76.93			59.81
112.61			82.07
109.7			62.59
129.85			97.86
130.91			37.84
151.17			64.22
66.06			66.6
50.54			110.93
60.7			102.69
106.02			40.36
82.69			83.25
113.65			57.25
122.49			58.05
128.09			59.83
134.02			42.56
103.96			146.97
139.89			150.16
58.85			106.33
104.01			29
112.58			103.65
154.35			88.51
59.5			40.09
123.91			88.55
79.52			101.78
80.32			82.51
52.75			126.38
89.14			65.71
122.05			94.16
129.11			65.58
138.04			72.76
101.84			71.61
91.83			77.61
120.79			106.13
133.85			92.69
67.57			55.19
58.25			79.17
49.35			63.47
58.12			44.02
62.19			127.6
161.03			125.2
84.9			138.87
4.42			61.94
74.07			64.34
109.29			27.55
92.6			72.82
172.53			62.8
150.7			88.06
114.05			56.18
45.8			159.28
52.3			70.48
62.9			41.06
132			9.33
90.57			96.86
92.78			87.81
51.11			99.84
46.4			28.8
			121.92
			81.78
			51.29
			148.36
			129.02
			101.91
			83.23
			44.59
			48.05
			48
			65.55
			76.32
			77.78
			48.97
			79.09
			76.04
			67.1
			40.53
			52.87
			69.61
			88.49
			100.06
			46.86
			83.72
			43.95
			69.69
			157.74
			109.38
			43.56
			89.76
			115.36
			28.61
			24.87
			58.06
			73.1
			42.28
			55.65
			40.82
			92.38
			81.31
			104.63
			113.81
			77.15
			66.56
			111.03
			126.05
			199.3
			131.95
			56.53
			102.56
			66.6
			40.18
			70.62
			86.69
			35.33
			88.74
			52.35
			65.71
			152.85
			110.33
			99.36
			77.67
			33.1
			132.23
			71.36
			76.33
			96.98
			116.5
			107.94
			61.17
			120.11
			105.26
			62.11
			39.05
			98.91
			132.76
			104.63
			137.16
			34.29
			123.25
			76.29
			142.77
			50.5
			84.13
			83.86
			54.71
			112.54
			89.34
			104.65
			73.94
			75.46
			49.76
			104.72
			128.97
			72.08
			55.55
			92.78
			52.25
			13.83
			82.97
			84.71
			165.59
			76.63
			45.19
			136.79
			75.96
			117.39
			120.49
			98.53
			98.26
			67.62
			28.63
			49.59
			85.83
			101
			154.78
			89.78
			56.55
			33.81
			103.96
			12.54
			163.16
			104.42
			58.4
			70.04
			53.1
			141.05
			94.69
			108.97
			27.6
			141.41
			163.88
			73.64
			20.21
			62.45
			41.57
			56.79
			119.17
			49.48
			40.5
			55.05
			65.46
			41.58
			116.58
			130.08
			69.37
			36.82
			107.84
			94.34
			52.43
			113.39
			63.67
			87.36
			99.8
			92.37
			87.57
			58.76
			79.71
			74.02
			35.19
			73.5
			74.56
			98.57
			113.04
			74.06
			74.09
			67.17
			29.47
			134.31
			108.16
			110.91
			66.41
			55.9
			53.56
			103.12
			81.39
			50.59
			94.2
			37.06
			41.31
			52.53
			136.29
			28.93
			39.77
			92.49
			62.97
			93.25
			54.31
			106.5
			67.3
			78.97
			70.61
			61.07
			39.19
			60.29
			97.87
			61.13

## Sheet: F1J
Droplets profile intensities
Top panel				Middle panel					Bottom panel
X	green	red		X	green	red	blue		X	green	red	blue
0	0.0121577	0.0242561		0	0.0226956	0.0469281	0.00790968		0	0.00346757	0.00688373	0.000339818
0.1318	0.0187817	0.0444218		0.13179	0.0357255	0.0663072	0.021767		0.13179	0.00505477	0.0197796	4.79743e-05
0.2636	0.00661772	0.0405798		0.26358	0.0706551	0.0996326	0.0451314		0.26358	0.00853245	0.0500271	0.0330283
0.3954	0.0112249	0.0737496		0.39536	0.115421	0.17476	0.110939		0.39536	0.0614154	0.152669	0.141428
0.5272	0.0115652	0.151099		0.52715	0.205096	0.273049	0.298659		0.52715	0.199916	0.383844	0.406884
0.6589	0.0176662	0.3885		0.65894	0.341304	0.404408	0.619709		0.65894	0.484869	0.59104	0.621915
0.7907	0.0504018	0.704301		0.79073	0.486238	0.569847	0.910533		0.79073	0.76555	0.549729	0.651757
0.9225	0.0844358	0.91814		0.92252	0.65646	0.747159	0.964899		0.92252	0.917183	0.449862	0.597204
1.0543	0.104377	0.98532		1.05431	0.790192	0.846026	0.947517		1.05431	1	0.419774	0.527145
1.1861	0.168569	0.927811		1.18609	0.805572	0.927977	0.892267		1.18609	0.985286	0.420975	0.485728
1.3179	0.237337	0.787053		1.31788	0.891171	0.90152	0.952014		1.31788	0.936123	0.459556	0.603636
1.4497	0.432925	0.61763		1.44967	0.943764	0.879115	0.925445		1.44967	0.978325	0.580315	0.768964
1.5815	0.629175	0.532641		1.58146	0.992298	0.939446	0.983211		1.58146	0.701031	0.820738	0.80134
1.7132	0.805786	0.502134		1.71325	1	1	0.957418		1.71325	0.376242	1	1
1.845	0.942104	0.450895		1.84504	0.966827	0.95192	0.956721		1.84504	0.152861	0.932488	0.966894
1.9768	0.958976	0.394559		1.97682	0.999205	0.913795	0.999321		1.97682	0.0592014	0.874883	0.925284
2.1086	1	0.364154		2.10861	0.950708	0.855057	0.945144		2.10861	0.0442596	0.782647	0.948264
2.2404	0.961334	0.395056		2.2404	0.834854	0.738815	0.935217		2.2404	0.0378552	0.704755	0.779232
2.3722	0.993143	0.395929		2.37219	0.843323	0.673717	1		2.37219	0.0263151	0.44947	0.488806
2.504	0.894879	0.494941		2.50398	0.79277	0.509378	0.964679		2.50398	0.012	0.171337	0.165681
2.6358	0.80605	0.623186		2.63576	0.579605	0.337085	0.877985		2.63576	0.00588881	0.0823647	0.0486739
2.7676	0.667992	0.803791		2.76755	0.400816	0.205832	0.708396		2.76755	0.00619209	0.0404219	0.0116737
2.8993	0.465345	0.936317		2.89934	0.23843	0.13971	0.473161		2.89934	0.00447852	0.0414447	0
3.0311	0.283427	1		3.03113	0.141884	0.116915	0.172054
3.1629	0.177733	0.988723		3.16292	0.0997488	0.0773487	0.0427721
3.2947	0.131081	0.878006		3.29471	0.0701533	0.0614648	0.0134149
3.4265	0.0864211	0.608474		3.42649	0.0279419	0.0405654	0.0140403
3.5583	0.0486938	0.318885		3.55828	0.0219306	0.0233788	0
3.6901	0.0250843	0.115948
3.8219	0.0168909	0.0448168
3.9536	0.00545804	0.0391335
4.0854	0.00231935	0.0223511
