# Supplementary material for: Rational optimization of a transcription factor activation domain inhibitor
Source: Nat Struct Mol Biol. 2023 Dec 4;30(12):1958–69. doi: 10.1038/s41594-023-01159-5 (PMC10716049; doi:10.1038/s41594-023-01159-5)
Supplement: Supplementary file 14 — Statistical source data. [file 41594_2023_1159_MOESM14_ESM.xlsx]

## Sheet: F2B
Nuclear translocation
Time (min)	WT																22YtoS																									14YtoS
0	1	1	1	1	1	1	1	1	1	1	1	1	1	1	1		1	1	1	1	1	1	1	1	1	1	1	1	1	1	1	1	1	1	1	1	1	1	1	1		1	1	1	1	1	1	1	1
0.25	1.05114	1.01262	1.04282	0.949206	0.995458	1.0301	1.01743	1.15493	0.95993	0.99502	1.04819	1.02491	0.94256	0.986272	0.941548		1.00792	0.973938	0.981754	0.94739	1.03313	1.0112	0.975145	1.01513	0.885811	1.11015	0.965432	0.98853	0.979346	1.09423	0.938232	1.06263	0.95211	0.977285	0.993839	1.03338	0.954936	1.03277	0.954913	0.954209		0.980991	1.03757	1.05168	1.02704	0.974936	1.02009	1.03503	0.877182
0.5	1.02278	0.983022	0.99789	0.976898	0.952753	1.05197	1.04304	1.03042	0.954767	0.956188	1.03266	1.01495	0.832147	0.849423	0.85006		1.00322	0.997376	1.03762	0.951632	0.990078	0.928073	0.949302	1.11471	0.841972	1.18758	0.966036	0.945918	0.833636	1.07321	0.964316	1.00081	0.851814	0.946743	0.967904	1.02947	0.946847	1.03464	0.939286	0.991452		1.03563	1.03355	1.06611	1.05625	1.00835	1.01863	1.13597	1.01541
0.75	1.02486	0.982426	0.997362	1.01938	0.996972	1.05417	1.02711	1.04001	1.01792	0.964731	1.07165	1.01111	0.827728	0.858684	0.86008		1.01827	0.976801	1.01959	0.982623	1.02636	0.938348	0.920674	1.09985	0.848922	1.06517	0.978738	0.795779	0.769859	1.16512	0.97769	1.1476	0.907042	0.98791	1.0138	1.00651	0.987254	1.05685	0.909457	1.07598		1.03604	1.05888	1.05506	1.15675	1.01649	1.06682	1.02703	1.13725
1	0.95987	1.04781	0.999033	0.997522	1.0468	1.08435	1.01259	0.958438	1.03069	1.01535	1.08412	1.1061	0.908537	0.828775	0.871666		0.966153	0.974594	0.988614	0.9504	1.0169	0.873399	0.887794	1.14535	0.857966	1.01935	0.941893	0.782796	0.679301	1.10631	0.92188	1.07477	0.860046	1.06778	1.04695	1.03149	0.99704	1.07015	0.921177	1.04348		0.990537	1.05862	1.09753	1.16472	0.871037	1.03985	1.08856	1.08835
1.25	0.990072	1.06007	1.05601	0.955109	1.09765	1.20169	1.07149	1.08373	1.0997	1.00567	1.02402	1.10431	0.88561	0.775223	0.927144		0.958845	0.996183	1.02956	0.977834	1.056	0.868415	0.884231	1.08553	0.842829	0.982615	0.934239	0.82955	0.754199	1.15436	0.872824	1.12559	0.806558	1.11767	1.01633	1.04327	0.975101	1.053	0.935798	1.03283		0.942232	1.00817	1.10081	1.18419	0.975578	1.03159	1.11719	1.15889
1.5	1.04947	1.11059	1.11942	1.05488	1.13606	1.22152	1.03321	1.12063	1.12795	1.05309	1.07305	1.15339	0.940645	0.822456	0.962058		0.966066	0.958254	1.03706	0.990012	1.02321	0.879841	0.883242	1.10419	0.826884	1.04275	0.986529	0.762724	0.714707	1.16022	0.898841	1.04693	0.861504	1.13566	1.048	0.998178	0.976995	1.07758	0.949899	0.975782		0.942479	1.0022	1.13622	1.17976	0.938089	0.982182	1.05833	1.1246
1.75	1.03329	1.12449	1.17262	1.05881	1.07942	1.1788	1.07223	1.13315	1.18699	1.09338	1.12047	1.19889	0.941136	0.803552	0.941652		0.966762	0.973402	1.08126	0.950469	1.0551	0.851008	0.838743	1.10305	0.748441	0.965031	0.969986	0.755317	0.786201	1.17654	0.830785	1.17527	0.826034	1.10085	1.0907	1.02908	0.975219	1.10483	0.955198	0.962757		0.920095	1.02595	1.11882	1.24378	1.06405	1.00016	1.06472	1.23281
2	1.05415	1.16409	1.14333	1.08388	1.11708	1.19495	1.06091	1.0636	1.12532	1.11138	1.12624	1.2207	0.923217	0.855088	0.971505		1.01131	0.95068	1.10559	0.963262	1.06702	0.860594	0.866293	1.14373	0.780475	1.0018	0.94535	0.737077	0.744439	1.12914	0.818007	1.2782	0.810886	1.09622	1.06959	1.00631	0.960579	1.10014	1.01487	0.981887		0.963051	1.02042	1.07911	1.32776	0.939589	0.99676	1.09042	1.18009
2.25	1.06349	1.16849	1.19293	1.09641	1.16262	1.2579	1.13746	1.1545	1.09652	1.11919	1.09198	1.30556	0.895675	0.844356	1.00407		1.01201	0.969525	1.02171	0.987138	1.03177	0.815735	0.868839	1.12881	0.711885	0.937151	0.929657	0.736519	0.828189	1.15238	0.809467	1.19307	0.851296	1.10112	1.08526	0.984776	0.970839	1.06935	0.969383	0.949732		0.977699	1.04788	1.17337	1.53053	0.943016	0.993278	1.11693	1.4161
2.5	1.12999	1.17955	1.15063	1.14852	1.1688	1.24786	1.09264	1.24886	1.15025	1.0911	1.166	1.27183	0.95066	0.904228	1.05882		1.0134	1.00614	1.06266	0.946159	1.02069	0.899624	0.879679	1.09133	0.736113	0.938993	0.923676	0.791079	0.779392	1.16491	0.767163	1.21557	0.833843	1.08583	1.10326	0.948211	1.01259	1.05106	0.981422	0.998101		0.950708	1.02111	1.08617	1.52817	0.863539	0.992144	1.14716	1.34182
2.75	1.18972	1.18414	1.2485	1.13322	1.17202	1.34859	1.23487	1.17644	1.25556	1.1493	1.1933	1.35931	1.01119	0.954838	1.08152		1.01035	1.07508	1.12885	0.9543	1.04497	0.91151	0.911032	1.11335	0.713361	0.948339	0.925158	0.776344	0.709714	1.12475	0.755247	1.21136	0.804065	1.10492	1.0491	0.975992	1.02786	1.0423	0.936704	0.987111		0.937212	1.02212	1.16754	1.67971	0.930591	1.05167	1.09948	1.5163
3	1.16494	1.22287	1.27823	1.11813	1.16451	1.27099	1.09532	1.28126	1.23967	1.15926	1.23355	1.32835	1.01311	0.94574	1.07442		1.02462	1.01861	1.04236	0.953752	1.01145	0.962426	0.941097	1.02929	0.715027	0.992575	0.941262	0.771247	0.709033	1.1393	0.776829	1.1777	0.860328	1.12167	1.08874	1.02472	1.00868	1.08353	0.957378	0.992877		0.974901	1.02432	1.11391	1.71433	0.929092	1.04617	1.12532	1.50962
3.25	1.1717	1.21158	1.21518	1.14276	1.20854	1.27616	1.16062	1.31997	1.22219	1.11097	1.26767	1.30066	1.1003	0.906625	0.995668		1.0027	1.0201	1.10743	0.990764	1.06626	0.923625	0.922681	1.00602	0.802037	0.994871	0.935638	0.75221	0.698139	1.03234	0.750546	1.19599	0.813661	1.13939	1.0833	0.986597	1.00221	1.07316	0.981204	0.978428		0.986587	1.01772	1.13141	1.56948	1.09619	0.999028	1.14196	1.55771
3.5	1.19731	1.24751	1.30865	1.08891	1.14502	1.34624	1.14603	1.32498	1.24479	1.18365	1.33904	1.40088	1.12995	0.901068	1.05308		1.04237	1.03375	1.15262	0.980707	1.06732	0.934668	0.919057	1.04458	0.783569	0.893786	0.909383	0.712465	0.635497	1.07225	0.764978	1.17042	0.876323	1.22249	1.09209	1.03084	1.04439	1.02454	0.947518	0.997151		0.998436	1.00729	1.15239	1.57597	1.02549	1.04009	1.17246	1.56617
3.75	1.25596	1.26894	1.32694	1.19137	1.10326	1.35369	1.21424	1.35747	1.25779	1.22427	1.32296	1.40627	1.12588	0.893332	1.00866		1.05621	1.01712	1.15092	1.00014	1.11135	0.936815	0.920135	1.01209	0.737731	0.903509	0.891248	0.753485	0.70699	0.96155	0.717312	1.17058	0.894999	1.24564	1.11086	0.986858	1.03705	1.00088	0.970003	0.940235		0.989302	1.02168	1.21339	1.7398	0.951585	1.04754	1.15408	1.58684
4	1.27741	1.2984	1.44047	1.24421	1.08068	1.42972	1.18304	1.41502	1.27959	1.19951	1.29225	1.46018	1.18999	0.911691	0.996295		1.02419	1.02302	1.13345	1.03079	1.10152	0.91128	0.845691	1.00564	0.723404	0.927488	0.942963	0.747511	0.731729	0.968017	0.709765	1.16038	0.930329	1.17942	1.10446	0.989135	1.05923	1.04089	0.951928	0.981412		1.03925	1.00094	1.16396	1.62179	1.11547	1.08164	1.09642	1.54667
4.25	1.32797	1.30606	1.45841	1.19086	1.17662	1.4088	1.25438	1.45891	1.29687	1.2171	1.30109	1.53116	1.20006	0.93054	1.07839		1.00435	1.03537	1.04717	1.03715	1.08167	0.89418	0.898036	1.00553	0.694131	0.938616	0.916214	0.87949	0.671584	0.964733	0.723006	1.14582	0.89053	1.13279	1.13139	1.0363	1.03196	1.05838	0.932478	0.890984		1.02304	1.00151	1.11309	1.65798	0.875321	1.10092	1.21414	1.55593
4.5	1.36359	1.3698	1.59488	1.27219	1.20583	1.39069	1.27828	1.47187	1.31619	1.26342	1.37337	1.63514	1.19706	0.92433	1.07432		1.03376	1.01425	1.12199	1.01916	1.06583	0.956215	0.897137	1.00282	0.654101	1.0261	0.94941	0.758025	0.684521	1.0148	0.700298	1.26525	0.891142	1.27022	1.13426	1.03891	1.0324	1.0391	0.946496	0.966081		1.03563	1.01659	1.16805	1.72101	0.912168	1.07937	1.13424	1.42029
4.75	1.38804	1.39522	1.66892	1.26293	1.24462	1.41883	1.30285	1.48967	1.36802	1.26237	1.38869	1.6973	1.23447	0.852255	1.13794		1.03132	1.01837	1.03819	1.03345	1.03211	1.00713	0.924657	1.03943	0.649674	1.06067	0.946063	0.853923	0.739673	1.02541	0.71142	1.30701	0.902526	1.23964	1.10288	0.988939	1.03966	1.05522	0.996579	0.972322		1.0149	0.990701	1.11995	1.67716	0.968723	1.06925	1.20202	1.38244
5	1.44652	1.36764	1.72538	1.36022	1.1688	1.49471	1.27575	1.50324	1.36559	1.27987	1.44266	1.74941	1.23452	0.89355	1.01012		1.02558	1.02225	1.04908	0.94137	1.03172	1.01327	0.932473	1.04762	0.668142	1.05689	0.956077	0.866189	0.785974	1.03153	0.723999	1.25797	0.904314	1.19025	1.14868	0.962394	1.04262	1.06268	0.960127	0.961536		1.01078	0.986302	1.12547	1.43062	0.863753	1.03458	1.23745	1.38876
5.25	1.42433	1.42013	1.78447	1.42064	1.16558	1.46641	1.32743	1.46816	1.38371	1.3198	1.45094	1.7579	1.25328	0.912781	1.04906		1.0489	1.03853	1.15346	1.02586	1.07716	1.06464	0.954962	1.05787	0.65629	1.03451	0.939095	0.808443	0.755561	1.01612	0.683019	1.24583	0.906901	1.15947	1.11998	1.01139	1.03788	1.10106	0.965476	1.01085		1.03127	0.975935	1.18555	1.33681	1.01007	1.06633	1.18817	1.35198
5.5	1.51118	1.42321	1.78183	1.43864	1.11014	1.52152	1.37627	1.55197	1.3715	1.34227	1.49815	1.75586	1.2304	0.958924	1.10563		0.996085	1.02684	1.14399	1.01984	1.07827	1.02722	0.960622	1.08282	0.672045	0.989981	0.962003	0.814974	0.632093	1.07124	0.708971	1.27383	0.886108	1.12673	1.08105	1.02498	1.05154	1.08825	0.987173	0.984736		1.03497	0.951932	1.17828	1.37339	0.970651	1.10828	1.15102	1.28384
5.75	1.39721	1.38269	1.74332	1.55334	1.09639	1.49722	1.4179	1.56632	1.44151	1.38837	1.52232	1.7401	1.18602	0.964535	1.09222		1.04603	1.03936	1.1495	1.01881	1.16169	1.02024	0.971552	1.06671	0.619496	0.961982	0.980686	0.806691	0.449614	1.06093	0.6809	1.20408	0.841605	1.1225	1.11243	1.04398	1.07987	1.12449	1.00739	0.929856		1.08081	0.964562	1.19486	1.25175	0.922665	1.08771	1.15115	1.2997
6	1.49458	1.45019	1.75809	1.56493	1.09109	1.60908	1.4523	1.62326	1.52408	1.39961	1.52343	1.77497	1.24748	1.02092	1.02385		1.00687	1.01765	1.14293	1.02825	1.03236	1.05253	1.02998	1.08461	0.649864	0.948061	0.910178	0.887694	0.717204	1.0766	0.675604	1.22965	0.798184	1.13686	1.04614	0.971568	1.09088	1.06931	1.00273	1.14653		1.03004	0.954131	1.19578	1.27653	0.947943	1.08877	1.12225	1.25401
6.25	1.57025	1.473	1.78298	1.60421	1.10288	1.61715	1.40524	1.66854	1.48069	1.45772	1.43667	1.87323	1.20816	1.03209	1.00167		1.08309	1.0981	1.22192	1.05795	0.99736	1.06756	1.03009	1.06763	0.660098	0.973229	0.909026	0.938112	0.708579	1.07953	0.698841	1.22641	0.793433	1.11827	1.05961	1.02863	1.05501	1.07168	0.986452	1.12157		1.04534	0.935784	1.16017	1.20572	0.905313	1.10845	1.12558	1.41307
6.5	1.55506	1.56023	1.78104	1.60319	1.08112	1.61464	1.46057	1.68781	1.56455	1.42423	1.48061	1.83909	1.37542	1.11909	1.02563		1.07143	1.03697	1.19851	1.01498	0.997956	1.07039	1.03288	1.11124	0.652339	0.925231	0.92524	0.889924	0.73241	1.04103	0.66521	1.17592	0.781201	1.07927	1.08349	1.02498	1.06913	1.08177	1.00079	1.06926		1.03563	0.980522	1.15566	1.16432	0.911311	1.11995	1.15728	1.40123
6.75	1.59928	1.58326	1.90908	1.56646	1.04737	1.70753	1.51031	1.76195	1.53054	1.46087	1.44955	1.86703	1.27473	1.10988	1.0513		1.03333	0.963562	1.15587	0.987891	1.03462	1.09232	1.03605	1.02137	0.616307	0.978139	0.973525	0.900677	0.640944	1.08251	0.677325	1.09468	0.748789	1.0795	1.04771	1.027	1.09577	1.06889	0.98833	1.09558		1.01909	0.95677	1.17951	1.1892	0.886889	1.17389	1.13064	1.45075
7	1.58877	1.54242	1.88138	1.61769	1.0774	1.70009	1.52387	1.71641	1.57617	1.47988	1.55553	1.81426	1.22829	1.14104	1.06205		1.07578	1.02296	1.1947	1.04584	1.07069	1.09631	1.05651	1.02549	0.576086	1.03839	0.92631	0.964476	0.803223	1.03961	0.642635	1.1141	0.733217	1.04257	1.04738	0.9946	1.07154	1.11203	1.01829	1.11675		1.09027	0.918379	1.15413	1.28184	0.891817	1.13566	1.18604	1.41307
7.25	1.57642	1.57624	1.99754	1.54664	1.09027	1.70165	1.55075	1.72229	1.62026	1.52181	1.52176	1.9367	1.27591	1.13718	1.11847		1.06717	0.977696	1.17638	1.02333	0.988929	1.16786	1.06205	0.997993	0.610024	1.17522	0.971907	0.937077	0.686337	1.05538	0.701159	1.18207	0.731524	1.02964	1.09275	0.954262	1.1198	1.11336	0.979846	1.17054		1.15973	0.958341	1.17931	1.2011	0.91024	1.14692	1.10201	1.42768
7.5	1.63024	1.50172	1.95841	1.49475	1.10276	1.74461	1.58947	1.85699	1.68188	1.54356	1.58547	1.9037	1.22735	1.18539	1.14978		1.07074	1.04079	1.22454	0.998084	0.990206	1.11142	1.04743	1.02755	0.609739	1.00438	0.938656	0.848347	0.611439	0.999141	0.644091	1.30927	0.725079	1.08763	1.03783	1.02609	1.10433	1.11352	0.985127	1.08215		1.24613	1.01923	1.15802	1.20484	0.842759	1.13404	1.22053	1.41744
7.75	1.61205	1.58757	2.01741	1.45438	1.18325	1.71286	1.52856	1.79763	1.70889	1.57618	1.70058	1.96186	1.26339	1.26961	1.21575		1.12756	1.00298	1.2082	1.12301	0.964997	1.0536	1.05612	1.04691	0.614499	1.01356	0.94963	0.897491	0.68089	1.0578	0.622906	1.26056	0.7486	1.05732	1.06844	0.968055	1.07549	1.13356	0.990493	1.02313		1.17775	0.923217	1.21185	1.18301	0.883676	1.17389	1.15501	1.39731
8	1.76448	1.56027	1.97371	1.54985	1.13663	1.7871	1.64376	1.93796	1.67532	1.56809	1.7058	1.9554	1.37827	1.30388	1.11946		1.1092	1.01372	1.19943	1.06232	0.952095	1.06227	1.03243	1.08135	0.619163	0.995446	0.926859	0.930864	0.519519	1.05689	0.647269	1.34018	0.75227	1.06944	1.09428	1.00215	1.0977	1.0985	0.984038	1.04335		1.1566	1.03035	1.28943	1.09863	0.91431	1.14206	1.17566	1.43846
8.25	1.72134	1.61901	2.00985	1.62141	1.14931	1.7664	1.6025	1.92569	1.73694	1.62387	1.68373	2.00923	1.31602	1.30486	1.17703		1.09066	1.04932	1.12553	1.08627	0.948561	1.05789	1.05699	1.09914	0.604693	0.972991	0.926228	0.866348	0.583069	1.07018	0.607084	1.16362	0.682034	1.10745	1.10102	0.982368	1.08875	1.16884	1.00976	1.00204		1.21305	1.00421	1.20704	1.10168	0.881105	1.09063	1.23638	1.47212
8.5	1.71166	1.604	2.12372	1.58271	1.20204	1.75331	1.68799	1.96881	1.74076	1.63429	1.7276	2.0339	1.35932	1.36152	1.27916		1.03855	1.06542	1.17822	1.13142	0.957205	1.06993	1.04507	1.05787	0.621353	0.959586	0.917366	0.88857	0.640717	1.11914	0.632241	1.32627	0.71854	1.11551	1.06204	0.98907	1.07774	1.115	1.01625	0.978224		1.16178	0.971913	1.19732	1.23041	0.775921	1.14044	1.18444	1.49564
8.75	1.81428	1.60625	2.17807	1.65522	1.218	1.74657	1.72254	2.03163	1.88332	1.65384	1.7347	2.05644	1.45501	1.36593	1.24508		1.12556	1.0684	1.16832	1.10618	0.941705	1.1154	1.11589	1.16309	0.589366	1.02933	0.952154	0.901155	0.690649	1.14536	0.591261	1.17284	0.737875	1.01645	1.11167	0.995055	1.09001	1.0937	0.983669	1.02863		1.28283	0.977883	1.20899	1.19569	0.887746	1.15923	1.20575	1.44514
9	1.83547	1.68215	2.30725	1.66572	1.2339	1.77032	1.63013	2.08952	1.84449	1.61401	1.62872	2.05334	1.43203	1.44084	1.3135		1.08849	1.01962	1.13925	1.05713	0.918966	1.02277	1.04088	1.21602	0.566567	1.01931	0.958711	0.876384	0.575806	1.16729	0.645813	1.03285	0.734629	1.02505	1.1003	1.02264	1.09107	1.14674	1.00503	1.10406		1.24926	0.963556	1.22997	1.13689	0.834619	1.10488	1.18218	1.40951
9.25	1.82354	1.68545	2.22775	1.65187	1.18072	1.81477	1.74659	1.99767	1.83019	1.65065	1.78511	2.18549	1.51736	1.4112	1.30139		1.03637	1.0399	1.16287	1.03941	0.904275	1.01955	1.07714	1.14345	0.537341	0.983387	0.942551	0.813939	0.601226	1.19003	0.61483	1.13174	0.743802	0.997768	1.12351	0.997007	1.07683	1.10094	1.0359	1.10623		1.31336	0.960226	1.1443	1.19097	0.903385	1.10302	1.17259	1.44781
9.5	1.74312	1.70234	2.29458	1.70573	1.21453	1.83923	1.75076	1.98471	1.89235	1.65649	1.78358	2.20224	1.48245	1.3425	1.26705		1.1078	1.03393	1.07624	1.1594	0.828522	1.0102	1.05061	1.11346	0.580608	1.02628	0.892785	0.883154	0.618248	1.22494	0.625422	1.07202	0.67399	1.00706	1.07475	0.990761	1.09281	1.10342	0.992237	1.06553		1.31065	0.975369	1.23979	1.29157	0.809769	1.08277	1.10401	1.49172
9.75	1.9023	1.72115	2.26662	1.73772	1.21535	1.82292	1.75828	2.13782	1.93108	1.64297	1.79347	2.19554	1.46423	1.38227	1.32488		1.17437	1.06017	1.11132	1.17459	0.89661	0.965417	1.05474	1.17404	0.587225	1.03321	0.88406	0.901633	0.735815	1.15001	0.600397	0.95954	0.669521	1.00913	1.07284	0.972023	1.0891	1.11043	0.984289	0.991724		1.3973	0.986051	1.26702	1.21398	0.770994	1.10302	1.1381	1.42296
10	1.93509	1.71083	2.3885	1.70857	1.24689	1.95156	1.82709	2.14923	1.95675	1.67226	1.8505	2.13869	1.39977	1.48208	1.37472		1.15705	1.08713	1.15057	1.12971	0.877193	1.00721	1.05462	1.17036	0.57761	0.964853	0.871111	0.854719	0.726736	1.11833	0.642569	1.09581	0.753634	1.00793	1.05068	1.02362	1.12051	1.06169	1.02307	1.03555		1.29123	0.953943	1.22209	1.23955	0.845758	1.08221	1.13131	1.37905
10.25	1.83731	1.70844	2.34031	1.70106	1.22633	1.89739	1.86529	2.08148	2.10372	1.6803	1.80531	2.23262	1.62207	1.46034	1.30964		1.14078	1.09298	1.12426	1.11281	0.905851	0.956522	1.07229	1.12908	0.573944	0.903826	0.853224	0.845161	0.631866	1.16052	0.665012	1.01456	0.749588	0.927858	1.08865	0.993429	1.11605	1.09065	0.987156	1.02639		1.26358	0.98869	1.26159	1.25745	0.873393	1.16449	1.10734	1.38493
10.5	1.928	1.79204	2.52181	1.76585	1.23611	1.9307	1.8883	2.19787	2.10799	1.76993	1.85495	2.21073	1.49502	1.45658	1.25395		1.15783	1.05063	1.14272	1.07074	0.940087	0.994632	1.03995	1.13402	0.661288	0.888004	0.881454	0.858463	0.712665	1.08675	0.684277	1.02865	0.703909	0.953804	1.13412	0.962134	1.10204	1.11188	0.994836	1.04172		1.28629	0.961734	1.28646	1.23375	0.839546	1.03248	1.18444	1.38137
10.75	1.90864	1.7892	2.44882	1.78691	1.2954	2.05338	1.92896	2.12788	2.22939	1.71753	1.84646	2.19407	1.56223	1.53438	1.27577		1.13739	1.0798	1.14887	1.10317	0.933572	0.977226	1.02492	1.11704	0.629825	0.859154	0.91251	0.848347	0.669088	1.05942	0.733201	1.05875	0.721221	0.934719	1.06443	1.01724	1.08381	1.14572	0.951308	0.981819		1.25403	0.977883	1.26394	1.24643	0.767352	1.08334	1.24624	1.38306
11	1.9985	1.84454	2.44038	1.83997	1.35753	2.04249	1.94452	2.31807	2.24086	1.74339	1.86582	2.29584	1.60931	1.4647	1.2622		1.13156	1.052	1.08423	1.02518	0.967041	1.05674	1.02986	1.08309	0.641487	0.88351	0.946447	0.905376	0.66364	1.09615	0.71996	1.08529	0.754716	0.997302	1.10374	1.02342	1.09794	1.14141	0.969802	1.03243		1.30678	1.02287	1.30191	1.20867	0.827763	1.08002	1.24291	1.33666
11.25	2.06941	1.79631	2.50229	1.79369	1.45613	2.22207	1.94691	2.36041	2.14161	1.73128	1.7888	2.33374	1.59831	1.41763	1.34137		1.17402	1.07228	1.05233	0.964493	0.990973	1.05337	1.00554	1.10001	0.63311	0.889668	0.91454	0.896774	0.52769	1.04482	0.743926	1.14484	0.74893	0.970823	1.13378	1.02238	1.0863	1.14042	0.99445	1.01838		1.30703	0.97782	1.29792	1.22578	0.818338	1.05329	1.27141	1.44665
11.5	2.15743	1.83568	2.59919	1.87961	1.50041	2.08999	1.8988	2.37121	2.21758	1.84339	1.80705	2.40243	1.56557	1.43702	1.33203		1.16306	1.03888	1.09462	1.02798	0.980753	1.03405	1.02144	1.09974	0.666333	0.902261	0.941481	0.881561	0.55379	1.05947	0.74578	1.14566	0.69897	1.03204	1.09524	1.05198	1.08164	1.15577	0.977834	1.09877		1.36883	1.02231	1.29608	1.17829	0.779563	1.08553	1.25902	1.33319
11.75	2.17312	1.87051	2.55382	1.86846	1.62909	2.14941	1.89195	2.52372	2.26346	1.82142	1.82466	2.35106	1.65565	1.30737	1.33146		1.1152	0.979544	1.02928	1.06643	0.958993	1.02584	0.993232	1.17193	0.688372	0.954695	0.924636	0.830028	0.597367	1.1014	0.708176	1.15585	0.68114	1.00833	1.08158	1.06129	1.10702	1.13447	0.965426	1.12584		1.2751	0.995853	1.2927	1.16009	0.889246	1.08885	1.27314	1.31751
12	2.12631	1.91314	2.59119	1.9264	1.714	2.11037	2.00506	2.39834	2.2569	1.83512	1.88218	2.38087	1.67593	1.30513	1.52523		1.09745	0.997913	1.04788	0.998769	0.985863	0.961583	1.00398	1.15625	0.658289	0.937072	1.01791	0.848268	0.607581	1.07963	0.725455	0.999191	0.733405	0.987876	1.11234	1.09024	1.10919	1.1621	0.968159	1.04667		1.31987	0.978888	1.31379	1.2188	0.848329	1.0656	1.24504	1.28313
12.25	2.15919	1.8778	2.70471	1.93857	1.77026	2.08129	2.04177	2.38045	2.34434	1.89917	1.93663	2.39647	1.7616	1.24918	1.63394		1.14905	0.990697	1.05453	1.06417	0.978581	1.0253	1.04441	1.22839	0.703603	0.917013	0.975857	0.818718	0.54335	1.09524	0.725786	0.997572	0.696288	0.935385	1.13765	1.04951	1.12852	1.16199	0.987508	1.03636		1.32752	1.03337	1.2924	1.13866	0.802485	1.03402	1.11959	1.26167
12.5	2.22468	1.89198	2.64272	1.9511	1.73172	2.13718	2.06955	2.45649	2.31584	1.85847	1.83831	2.44082	1.78742	1.24662	1.55435		1.11216	0.971732	0.956153	1.01772	0.920371	0.996166	1.01455	1.14611	0.664049	0.964714	1.00576	0.881561	0.547662	1.1246	0.757167	1.03771	0.686503	0.953637	1.12896	1.06968	1.10358	1.16107	1.01058	1.06662		1.34513	1.03512	1.29096	1.13472	0.857112	1.05038	1.18271	1.23896
12.75	2.22051	1.95443	2.85095	2.01137	1.78894	2.14557	2.02927	2.52873	2.41986	1.92476	1.90641	2.43764	1.85021	1.26831	1.65054		1.12773	1.052	0.935502	1.03544	0.936254	1.02692	1.04656	1.22318	0.69237	1.09669	1.00595	0.885623	0.666591	1.1014	0.761072	1.12963	0.673849	0.928291	1.12815	1.0648	1.12312	1.20569	0.991298	1.03188		1.33196	1.00075	1.24675	1.13354	0.894602	1.02349	1.16713	1.14375
13	2.38829	1.94393	2.74367	1.95584	1.81341	2.21831	2.15109	2.69878	2.34062	1.92736	1.95314	2.49391	1.87177	1.23507	1.77104		1.1353	0.979485	0.892928	1.01485	0.99076	1.00192	0.996047	1.09773	0.672807	0.950636	1.03199	0.917961	0.652973	1.077	0.739954	1.17042	0.642188	0.999534	1.11133	1.1229	1.09711	1.16199	0.960144	1.01859		1.34628	0.983035	1.32238	1.1123	0.846401	1.06828	1.17086	1.18222
13.25	2.25797	1.96426	2.72239	1.98324	1.88065	2.21243	2.14163	2.56433	2.34285	1.99836	1.88747	2.66683	1.90805	1.25872	1.79124		1.08475	0.993917	0.942786	1.00876	0.955118	1.01127	0.96173	1.10012	0.651245	0.929924	1.07438	0.925607	0.729914	1.05143	0.828865	1.15892	0.628028	0.991973	1.10331	1.08425	1.1142	1.15886	0.993528	0.96547		1.32694	1.02727	1.34602	1.11948	0.872322	1.11063	1.11373	1.07766
13.5	2.23411	1.99316	2.68088	2.05575	1.95402	2.18884	2.15481	2.67009	2.47686	1.97451	1.98196	2.55991	1.9269	1.29086	1.76269		1.09754	0.985389	0.892999	1.06848	0.95861	1.0309	0.954962	1.09036	0.699177	0.969962	1.05152	0.87272	0.5665	1.04012	0.8333	1.07979	0.61194	0.938882	1.0768	1.08803	1.10923	1.16195	0.968478	1.12265		1.39607	1.00848	1.32863	1.15341	1.00578	1.16134	1.20682	1.09173
13.75	2.22159	2.00344	2.79889	2.02296	1.96764	2.19284	2.18937	2.60503	2.42309	1.98291	2.02416	2.66724	1.9377	1.27871	1.78253		1.04081	0.978888	0.920934	1.07471	0.935914	1.03872	0.982242	1.12387	0.699891	1.0136	1.04455	0.867622	0.697912	1.10535	0.836875	1.22835	0.656866	0.936651	1.07785	1.04854	1.11301	1.14945	1.00367	1.03873		1.42051	1.0793	1.36209	1.1184	0.867609	1.0835	1.14263	1.11952
14	2.33656	2.05818	2.74085	2.01749	2.14937	2.19785	2.23338	2.78657	2.42711	1.96377	2.01205	2.58327	1.93078	1.36517	2.00705		1.14644	0.966842	0.89017	1.00212	0.918625	1.03658	0.936845	1.11276	0.702937	1.14405	0.999643	1.00805	0.702678	1.14663	0.940549	0.959702	0.593969	0.947375	1.12475	1.11171	1.11361	1.14461	1.02015	1.01486		1.41475	1.05215	1.35544	1.06815	0.819837	1.06682	1.24797	1.1002
14.25	2.26948	2.03776	2.61616	2.0532	2.18116	2.28471	2.28074	2.81154	2.55869	1.9831	2.16921	2.52332	1.99391	1.40505	1.9725		1.10885	1.02827	0.872136	0.97024	0.91194	1.06641	0.941666	1.13158	0.679471	1.06184	1.06019	1.04914	0.730595	1.14551	0.889639	1.08205	0.644588	0.885991	1.13173	1.03006	1.11116	1.16736	1.01378	1.0386		1.37088	1.04801	1.35145	1.09971	0.968509	1.10788	1.34638	1.08862
14.5	2.52486	1.97862	2.65811	2.06894	2.18129	2.40997	2.37419	2.82269	2.40804	2.01037	2.15285	2.65735	2.1055	1.36059	2.03726		1.09632	0.968929	0.880481	1.09858	0.869315	1.03313	0.85728	1.19286	0.669047	1.09404	1.05443	1.03608	0.69882	1.1296	0.864019	1.18563	0.630898	0.884526	1.11515	1.084	1.12158	1.21865	1.07721	0.996133		1.31254	1.05058	1.35339	1.18192	0.967009	1.0801	1.28472	1.10955
14.75	2.49341	2.02363	2.82492	2.04139	2.23232	2.3417	2.42579	2.9523	2.49002	1.97501	2.1064	2.59773	2.0244	1.39535	2.05349		1.12086	1.01449	0.825813	1.03742	0.863737	1.0306	0.866473	1.08906	0.680946	1.13374	1.0138	1.03481	0.715615	1.09362	0.93148	1.13141	0.644258	0.87047	1.1239	1.12999	1.1286	1.16686	1.0305	1.04762		1.29839	1.0274	1.29055	1.17524	0.937018	1.07702	1.37435	1.05166
15	2.53813	2.05892	2.90758	2.08257	2.25692	2.37556	2.42937	2.88879	2.50328	2.01197	2.26551	2.70579	2.08631	1.46208	2.07327		1.15575	0.994215	0.811881	1.01012	0.876427	0.989495	0.903755	1.07674	0.6878	1.05729	1.02137	0.975468	0.670903	1.10752	0.841443	1.12898	0.626476	0.894285	1.0949	1.07742	1.16992	1.12422	1.04329	0.978428		1.43754	1.04882	1.31041	1.17248	0.973436	1.10772	1.24863	1.1287
15.25	2.50868	2.07617	2.67965	2.08738	2.28903	2.55021	2.37017	2.90348	2.5503	2.00388	2.3178	2.70375	2.18823	1.47614	2.081		1.12712	1.02016	0.860891	1.05015	0.870891	1.01695	0.861113	1.13022	0.691275	1.1777	1.06137	1.04333	0.721516	1.13066	0.771533	1.05211	0.606624	0.841327	1.15055	1.14008	1.13385	1.16949	1.05845	0.969812		1.46355	1.07194	1.33211	1.15764	0.92138	1.10853	1.29365	1.10999
15.5	2.67771	2.08576	2.66567	2.04161	2.37816	2.45888	2.43719	3.03767	2.45675	2.02101	2.34865	2.61652	2.10084	1.59871	2.21888		1.16053	0.98521	0.802263	0.972224	0.85373	0.974772	0.855363	1.11753	0.67333	1.14518	0.976049	1.01856	0.885611	1.1057	0.759815	0.998543	0.580326	0.810252	1.15757	1.13793	1.16273	1.12007	1.04079	1.00237		1.49942	1.03016	1.33395	1.13571	0.899314	1.10731	1.2485	1.06119
15.75	2.70849	2.03074	2.78368	2.11092	2.3986	2.45073	2.4042	2.88663	2.53351	2.00827	2.40373	2.61202	2.10982	1.6071	2.18433		1.14913	0.981453	0.874116	0.953068	0.891841	0.968407	0.880068	1.13217	0.685849	1.21264	0.995885	0.930864	0.694054	1.14097	0.803376	1.10908	0.622383	0.87097	1.13779	1.11021	1.15078	1.12228	1.05359	1.07014		1.49728	1.04185	1.34152	1.0947	0.910883	1.11792	1.27993	1.07695
16	2.58627	2.05236	2.69293	2.18649	2.41998	2.5089	2.46571	3.00475	2.50507	1.95495	2.41703	2.64633	2.17699	1.63167	2.16304		1.14313	1.03781	0.790736	0.92625	0.850324	0.953071	0.861352	1.08938	0.62835	1.17635	1.02049	0.912386	0.830232	1.09999	0.782589	1.07849	0.645152	0.888389	1.10627	1.08979	1.11215	1.0889	1.02242	1.03148		1.47704	1.05152	1.34214	1.065	0.998929	1.1342	1.34385	1.14945
16.25	2.77282	2.01891	2.98505	2.21119	2.4683	2.63761	2.48954	3.27443	2.63163	1.83014	2.45763	2.71739	2.13948	1.70555	2.28313		1.15496	1.03978	0.925035	1.00541	0.868336	1.00498	0.856591	1.11552	0.675901	1.14625	1.01218	0.927599	0.736496	1.06654	0.760212	1.13578	0.58329	0.796063	1.12103	1.10891	1.07454	1.1099	0.994836	1.04423		1.40446	1.02865	1.32975	1.10847	0.913668	1.14376	1.40818	1.0896
16.5	2.65418	2.10026	3.0306	2.11157	2.45405	2.68402	2.46541	3.12849	2.60487	1.96683	2.47058	2.71135	2.16903	1.82382	2.29863		1.12077	1.01867	0.92942	1.01957	0.903849	0.970784	0.861352	1.14524	0.640392	1.05034	1.04933	0.902907	0.783023	1.09999	0.779014	1.1429	0.62403	0.819411	1.08726	1.09863	1.12643	1.11725	1.0078	1.0812		1.41804	1.08935	1.38379	1.12066	1.009	1.14052	1.32401	1.17617
16.75	2.71884	2.07397	2.83706	2.17818	2.51769	2.56502	2.43771	3.21611	2.57388	1.98063	2.40436	2.72	2.18302	1.80513	2.25615		1.19847	1.11928	0.9814	0.967093	0.898527	0.937581	0.852698	1.14942	0.599553	1.06772	0.997888	0.870888	0.761916	1.13324	0.757034	1.03722	0.609493	0.843825	1.12542	1.08744	1.13527	1.16362	0.981774	1.07096		1.46486	1.06478	1.34858	1.12322	0.925236	1.18741	1.28073	1.14891
17	2.70699	2.05786	2.96632	2.19509	2.61212	2.64028	2.45648	3.16314	2.57706	2.0048	2.46724	2.88026	2.11316	1.90575	2.32477		1.19595	1.09047	0.957143	0.98016	0.850707	0.976229	0.900341	1.13494	0.662764	1.10439	1.00151	0.92728	0.621425	1.13783	0.742933	1.10956	0.576704	0.876765	1.11028	1.10072	1.11917	1.10315	1.05047	1.02998		1.41343	1.07088	1.38338	1.1359	0.974936	1.10707	1.25636	1.25713
17.25	2.82213	2.03203	2.9526	2.20252	2.58696	2.62664	2.61985	3.21809	2.43605	2.00672	2.49767	2.86907	2.24631	1.94852	2.3384		1.15705	1.02195	0.945827	1.00711	0.87813	0.98382	0.911301	1.14936	0.666571	1.10168	1.04872	0.911589	0.656378	1.11151	0.730487	1.067	0.594157	0.87107	1.11883	1.07944	1.12241	1.14278	1.05295	1.05325		1.49588	1.07823	1.41603	1.17219	0.992074	1.1227	1.29072	1.09049
17.5	2.94193	2.04543	3.11898	2.21855	2.60928	2.81446	2.56333	3.39938	2.60313	2.09023	2.53332	2.94225	2.25971	1.9684	2.37154		1.18281	1.07276	0.911528	0.959431	0.926077	0.925159	0.897856	1.18077	0.626303	1.12045	1.07314	0.926245	0.72197	1.14253	0.720556	1.18045	0.58202	0.872968	1.09715	1.14073	1.12138	1.15475	1.06999	1.1023		1.39977	1.08263	1.40651	1.20572	1.06384	1.1653	1.36143	1.08799
17.75	2.94394	2.14477	3.08934	2.2085	2.64909	2.70071	2.6375	3.31893	2.54816	2.06254	2.62607	2.81843	2.20585	2.07398	2.36131		1.20073	1.04413	0.928218	0.969966	0.878811	0.997009	0.836557	1.1581	0.711124	1.10944	1.02239	0.896695	0.649342	1.16633	0.716849	1.21476	0.595239	0.888789	1.08784	1.08998	1.12122	1.12902	1.04913	1.12367		1.30044	1.03198	1.44202	1.19874	1.01135	1.19219	1.36316	1.07294
18	3.07192	2.0809	3.1042	2.10195	2.61515	2.81947	2.75761	3.32861	2.50352	2.10704	2.5274	2.81492	2.28961	2.07409	2.37248		1.17907	1.08492	0.913296	0.987001	0.879492	1.02316	0.847907	1.14438	0.665572	1.10192	1.01056	0.98853	0.691784	1.08544	0.775637	1.34585	0.570118	0.888956	1.08306	1.09636	1.13432	1.14217	1.04928	1.09436		1.27016	1.06076	1.36373	1.16265	1.04006	1.18377	1.35118	1.10848
18.25	3.06399	2.15207	3.19328	2.20558	2.64947	2.71843	2.6582	3.35142	2.51063	2.05528	2.64459	2.87364	2.21764	2.1472	2.3433		1.16193	1.03065	0.872277	1.0067	0.891288	1.02116	0.845661	1.1287	0.643153	1.11239	0.978134	0.928714	0.665002	1.07811	0.739225	1.18175	0.588559	0.859346	1.1141	1.09759	1.13495	1.1395	1.05473	1.08717		1.1789	1.05862	1.39454	1.1833	0.960583	1.22435	1.31975	1.06225
18.5	2.99016	2.13835	3.15582	2.23306	2.67514	2.84589	2.73021	3.34192	2.42637	2.18758	2.6088	2.85927	2.21533	2.13053	2.44544		1.2391	1.00119	0.919307	1.00212	0.853432	0.954681	0.799695	1.14492	0.650245	1.24019	1.0237	0.837117	0.674989	1.10762	0.780933	1.29099	0.576798	0.882927	1.08034	1.06428	1.09249	1.17437	1.06672	1.05278		1.1803	1.05523	1.38819	1.16226	1.07541	1.20823	1.37915	1.12558
18.75	3.05381	2.10155	3.18739	2.35141	2.76648	2.84111	2.81905	3.42686	2.45501	2.18804	2.66688	2.80577	2.30949	2.22794	2.41329		1.20003	1.04705	0.888967	1.01697	0.863183	0.992485	0.870426	1.09307	0.642153	1.29914	1.0082	0.86125	0.744893	1.10535	0.762926	1.15569	0.593969	0.909339	1.12003	1.1499	1.12083	1.14129	1.04405	1.11336		1.18787	1.05976	1.40938	1.11643	0.971508	1.19997	1.281	1.11614
19	3.16461	2.15514	3.09119	2.52281	2.83795	2.95163	2.77943	3.29007	2.50348	2.11092	2.82752	2.85804	2.3171	2.24286	2.51996		1.18646	1.05773	0.970651	1.0275	0.876852	0.985891	0.870037	1.1242	0.670475	1.26151	1.01761	0.880526	0.769405	1.12106	0.808474	1.28759	0.589923	0.960731	1.14701	1.17977	1.09822	1.14861	1.03112	1.12177		1.13776	1.0301	1.4671	1.16423	1.0392	1.25196	1.35438	1.17136
19.25	3.13699	2.08847	3.23452	2.50036	2.78887	2.78529	2.88972	3.56951	2.48451	2.06748	2.65552	2.88058	2.24469	2.21404	2.54115		1.20769	1.04562	0.960467	1.07115	0.916752	0.931447	0.910014	1.1824	0.625303	1.23714	1.01191	0.785663	0.745801	1.12702	0.708375	1.1306	0.594204	0.890721	1.09715	1.15569	1.13057	1.185	1.04924	1.09165		1.1157	1.06623	1.43813	1.16491	1.08976	1.22548	1.37262	1.13253
19.5	3.11797	2.05543	3.2019	2.59634	2.74465	2.92608	2.94638	3.45217	2.47195	2.10293	2.69758	3.07106	2.16427	2.35111	2.61208		1.22248	1.0294	0.949364	1.00014	0.889797	0.959436	0.889291	1.18174	0.622305	1.23678	1.01706	0.824612	0.775987	1.20387	0.74002	1.24761	0.588042	0.90774	1.10603	1.13201	1.11814	1.21937	1.07679	0.980666		1.1259	1.0426	1.4628	1.26856	0.962939	1.23358	1.35304	1.12959
19.75	3.25054	2.10223	3.27163	2.79048	2.80843	2.88869	3.00283	3.49417	2.49861	2.11225	2.79138	3.00237	2.25298	2.36195	2.58285		1.24093	1.01849	0.956153	0.986112	0.823667	1.01227	0.911242	1.14286	0.625399	1.36672	1.01602	0.878853	0.789832	1.17184	0.734128	1.11604	0.59284	0.891986	1.12437	1.10241	1.13728	1.23218	1.09829	1.0331		1.14261	1.07012	1.49616	1.21733	1.02913	1.20102	1.41031	1.21286
20	3.38119	2.09659	3.4577	2.6142	2.87927	2.96433	2.92464	3.5118	2.54707	2.10444	2.82341	3.08805	2.20227	2.42226	2.61192		1.20064	1.06566	0.940028	1.0589	0.861736	0.977762	0.950829	1.10994	0.705222	1.20706	0.937202	0.86818	0.775987	1.17209	0.750414	1.20311	0.601214	0.882061	1.16	1.13852	1.13207	1.25351	1.09854	1.08636		1.22186	1.07609	1.46525	1.19737	1.04306	1.22645	1.36037	1.18641
20.25	3.35825	2.17033	3.3149	2.78035	2.89144	2.99098	2.97997	3.4151	2.51986	2.0693	2.75238	3.10349	2.2085	2.46987	2.58635		1.2177	1.02594	0.921924	1.08935	0.856711	1.07461	0.906929	1.18988	0.627969	1.26072	0.975665	0.918917	0.79301	1.20059	0.747368	1.11717	0.59778	0.930822	1.12261	1.14001	1.14332	1.2656	1.098	1.12957		1.1338	1.06082	1.48245	1.29226	1.01307	1.18968	1.39952	1.15408
20.5	3.40138	2.21314	3.48936	2.60873	2.87435	3.09759	2.91116	3.57954	2.58813	2.12623	2.83399	3.01266	2.27547	2.38968	2.45316		1.23571	0.992486	0.903819	1.06451	0.912366	1.03573	0.954872	1.19812	0.611595	1.2772	0.963813	0.903544	0.827508	1.21549	0.756769	1.22075	0.550219	0.865241	1.12504	1.07085	1.13673	1.21648	1.07178	1.05176		1.20252	1.06472	1.46873	1.31458	1.03106	1.22337	1.47689	1.11151
20.75	3.50409	2.24889	3.45252	2.66557	2.86047	3.22897	2.95152	3.60883	2.52527	2.14437	2.87619	3.23981	2.21027	2.51667	2.5293		1.18298	1.03024	0.946252	1.06622	0.831375	1.0207	0.971552	1.24748	0.620591	1.19011	0.979396	0.897013	0.838402	1.18609	0.755048	1.19615	0.52458	0.8744	1.13335	1.06831	1.16202	1.25752	1.10538	1.04783		1.15594	1.09676	1.51264	1.30927	1.0437	1.19495	1.45465	1.15996
21	3.46321	2.20663	3.5277	2.68904	2.84627	3.22317	2.91794	3.65722	2.65069	2.12449	2.90426	3.25762	2.12873	2.54157	2.62064		1.22788	1.06572	0.990028	1.09277	0.886007	1.02439	0.96709	1.14633	0.625113	1.1511	0.934842	0.887057	0.760554	1.09332	0.73042	1.13611	0.521099	0.909905	1.11367	1.09915	1.16305	1.28953	1.14445	0.962146		1.16697	1.09846	1.57364	1.28498	0.978149	1.21276	1.55467	1.21999
21.25	3.47422	2.17896	3.55593	2.81788	2.88463	3.28251	2.96843	3.6872	2.56802	2.20348	2.94541	3.27812	2.20737	2.50289	2.64104		1.21474	1.07956	0.990028	1.09017	0.830267	1.02799	0.935408	1.01492	0.639012	1.11756	0.955885	0.873437	0.829324	1.11196	0.75432	1.10503	0.565931	0.864908	1.12165	1.08009	1.16341	1.27737	1.08511	1.0154		1.16022	1.02721	1.58735	1.41912	1.07626	1.19746	1.56013	1.20101
21.5	3.47047	2.16285	3.72336	2.61186	2.89504	3.19574	3.02018	3.72972	2.51082	2.26196	2.91066	3.45038	2.15828	2.57153	2.61667		1.23815	1.06095	0.997525	1.14045	0.787898	1.01058	0.993172	1.1153	0.639345	1.17568	1.00856	0.908483	0.813436	1.16401	0.796557	1.0594	0.589077	0.852485	1.13531	1.13234	1.15346	1.25039	1.09329	1.03643		1.15718	1.09802	1.54222	1.29924	0.916238	1.19114	1.58943	1.23539
21.75	3.50576	2.1539	3.80953	2.60472	2.82451	3.20538	3.02621	3.72393	2.6648	2.17374	2.91881	3.30638	2.28038	2.54195	2.64777		1.22622	1.09787	0.972065	1.04618	0.865866	1.01196	1.00213	1.06563	0.67671	1.23758	1.05953	0.82509	0.753518	1.16153	0.811586	1.14582	0.600226	0.890454	1.11191	1.06148	1.1447	1.30656	1.0998	1.03894		1.10854	1.0874	1.56617	1.29983	1.09297	1.23382	1.61952	1.23985
22	3.49833	2.24632	3.78148	2.55196	2.92929	3.12934	3.13158	3.69291	2.7067	2.22409	2.86589	3.41411	2.25583	2.62535	2.61275		1.21195	1.14373	1.00042	1.12	0.802461	1.00084	1.01039	1.12008	0.688895	1.26179	1.07366	0.860295	0.834317	1.16643	0.782589	1.07024	0.569412	0.9169	1.11797	1.04925	1.14624	1.30682	1.09324	1.0464		1.16697	1.10556	1.52103	1.31222	1.06919	1.27051	1.60141	1.17189
22.25	3.58084	2.20782	3.90468	2.79172	2.97843	3.17559	3.11684	3.69541	2.64901	2.22436	2.87396	3.45544	2.17924	2.61108	2.78827		1.26033	1.14068	0.950495	1.14052	0.849472	0.999847	1.02123	1.17941	0.665905	1.25979	1.12442	0.802947	0.756015	1.14193	0.733466	1.14905	0.537047	0.901612	1.15781	1.0931	1.13716	1.36044	1.06808	1.02958		1.17528	1.11197	1.57865	1.31675	0.972151	1.26185	1.65934	1.25294
22.5	3.62682	2.26146	3.79845	2.96939	2.8792	3.23132	3.18132	3.75002	2.70501	2.20079	2.82724	3.59577	2.17782	2.63413	2.68279		1.21952	1.19352	0.989463	1.12561	0.810467	1.0023	1.04387	1.17101	0.690276	1.31636	1.07314	0.816567	0.705402	1.18654	0.770804	1.11037	0.561227	0.892686	1.12337	1.13409	1.14967	1.35267	1.04901	1.02212		1.12475	1.09834	1.56524	1.31409	0.902314	1.2356	1.58197	1.37469
22.75	3.64834	2.1991	3.92921	2.68583	2.92336	3.33331	3.19175	3.7521	2.68128	2.2081	2.90265	3.65213	2.2684	2.6515	2.81134		1.23693	1.1213	0.990594	1.20291	0.79799	0.968331	1.0041	1.12615	0.636918	1.29189	1.11287	0.872162	0.67567	1.19159	0.730354	1.19081	0.575434	0.90854	1.13288	1.11139	1.1582	1.2925	1.03863	1.07869		1.13109	1.07132	1.52932	1.26109	0.916024	1.23617	1.52257	1.34316
23	3.6581	2.28404	3.9264	2.8721	2.96777	3.23485	3.23308	3.72747	2.68625	2.28078	2.96066	3.55689	2.22883	2.69939	2.8845		1.2023	1.16209	0.978784	1.0823	0.804718	0.951154	0.95038	1.19194	0.638679	1.26793	1.06985	0.811788	0.840218	1.13768	0.730487	1.18466	0.551254	0.876132	1.13421	1.14684	1.11191	1.34954	1.03986	1.02015		1.20252	1.10889	1.498	1.41223	0.836547	1.26257	1.54055	1.35429
23.25	3.71867	2.27894	4.11942	2.87196	2.94544	3.46923	3.25169	3.83945	2.59449	2.1466	3.00327	3.37703	2.2898	2.67945	2.88143		1.25885	1.1866	0.986209	1.05042	0.832993	0.972088	1.01446	1.1786	0.601361	1.31862	1.03413	0.846595	0.865411	1.12116	0.779808	1.14905	0.595663	0.870037	1.13579	1.07892	1.10713	1.32001	1.02705	1.00068		1.12146	1.07326	1.53055	1.28174	0.902099	1.18855	1.65801	1.35794
23.5	3.77782	2.35172	3.96623	2.52747	2.9783	3.44556	3.21871	3.8589	2.70819	2.23409	2.83135	3.51973	2.4989	2.77021	2.92125		1.31654	1.17975	1.03741	1.05117	0.827585	0.942336	0.982751	1.09301	0.63806	1.26633	1.05575	0.783831	0.787562	1.09327	0.71526	1.16168	0.564144	0.922162	1.11922	1.07716	1.0947	1.30545	1.00137	0.987721		1.15471	1.11643	1.51428	1.43721	0.830334	1.29068	1.64416	1.38965
23.75	3.84707	2.33534	3.80443	2.45773	2.88494	3.37062	3.31186	3.74596	2.71058	2.18297	2.88385	3.55248	2.35647	2.66545	2.79119		1.24885	1.13842	1.01308	1.00233	0.805953	0.948087	0.955261	1.10381	0.592794	1.21393	1.082	0.814417	0.868134	1.06462	0.716783	1.25651	0.543303	0.8335	1.07179	1.13012	1.14683	1.27021	0.989017	1.02374		1.17462	1.11046	1.52492	1.33956	0.73629	1.2484	1.70209	1.38538
24	3.88954	2.31662	4.04784	2.54387	2.96619	3.47919	3.27083	3.84352	2.75561	2.23752	2.91191	3.66953	2.38672	2.73464	2.83905		1.28069	1.13597	1.07051	1.03694	0.816641	0.91427	1.01051	1.15989	0.643391	1.23219	1.01372	0.838949	0.859737	1.12682	0.723668	1.17754	0.562168	0.886391	1.09978	1.09922	1.11732	1.33178	0.999245	0.942134		1.1724	1.1109	1.49043	1.29747	0.788989	1.24467	1.70116	1.35224
24.25	3.79977	2.24411	3.90609	2.48601	3.00246	3.46374	3.34046	3.96552	2.79017	2.17054	2.94938	3.68039	2.37385	2.76509	2.86405		1.28591	1.1191	0.969802	1.02073	0.801099	1.01495	0.971162	1.19758	0.593984	1.13386	1.00587	0.886738	0.842261	1.15026	0.737239	1.24551	0.603048	0.885625	1.12375	1.13702	1.0962	1.38883	0.992589	0.992673		1.20779	1.15338	1.48163	1.41499	0.692588	1.21098	1.64363	1.34156
24.5	3.93117	2.31276	3.88964	2.42705	3.1201	3.63432	3.34009	3.9854	2.72229	2.26698	2.99464	3.59364	2.30949	2.85852	2.90961		1.24719	1.11361	1.0942	1.01546	0.813022	1.00353	0.952327	1.13613	0.635775	1.084	1.12543	0.925129	0.866319	1.12889	0.704535	1.18336	0.567295	0.920663	1.12456	1.10137	1.10303	1.33308	1.02249	0.935215		1.11949	1.0945	1.51827	1.42433	0.809983	1.20896	1.74737	1.2459
24.75	3.91548	2.31588	3.84761	2.57776	3.06295	3.52465	3.41716	3.93277	2.78659	2.2229	3.08328	3.64265	2.34577	2.86429	2.89954		1.19934	1.13413	1.04724	1.01977	0.85769	1.00015	0.980296	1.18288	0.619354	1.04374	1.15742	0.868817	0.821607	1.05876	0.725919	1.21071	0.578021	0.910838	1.09872	1.13884	1.16463	1.30656	1.0453	0.954413		1.16006	1.14188	1.43905	1.42236	0.791988	1.23771	1.74377	1.28803
25	3.8439	2.31446	3.76222	2.60946	3.14729	3.64553	3.47993	3.88914	2.63898	2.17223	3.20549	3.67769	2.36997	2.92286	3.05819		1.24084	1.1343	1.03607	0.99008	0.778445	0.969634	0.986495	1.17741	0.665762	1.00739	1.19931	0.896695	0.882433	1.03294	0.779411	1.2146	0.553935	0.897482	1.11277	1.12856	1.15291	1.31109	1.01437	1.01147		1.24399	1.08966	1.5328	1.35264	0.849186	1.23115	1.9141	1.25089
25.25	3.95787	2.34713	3.96878	2.72642	3.13335	3.6692	3.55559	3.98609	2.71003	2.21285	3.0674	3.60859	2.34435	2.90848	3.06889		1.20064	1.17164	1.01888	1.00814	0.834653	0.963806	0.976672	1.16352	0.626065	1.01218	1.24321	0.862764	0.890831	1.01844	0.723072	1.23887	0.539305	0.948042	1.14061	1.12746	1.15066	1.2326	1.01123	0.957262		1.16903	1.10657	1.39361	1.32058	0.808269	1.23415	1.88867	1.20574
25.5	4.01427	2.32299	3.98356	2.75164	3.20974	3.73975	3.46593	4.02437	2.66912	2.18512	3.02374	3.67778	2.4607	2.94552	3.0798		1.24685	1.16937	1.05856	0.934186	0.782959	0.982593	0.977092	1.14541	0.663002	1.11142	1.2175	0.869693	0.921698	1.03724	0.736312	1.21589	0.583996	0.944678	1.09481	1.12889	1.15224	1.24106	1.04961	1.01187		1.24654	1.11869	1.46034	1.37152	0.8509	1.22945	1.79598	1.28963
25.75	3.94293	2.3636	4.06736	2.85301	3.24008	3.59732	3.51218	4.05357	2.82696	2.23797	2.97918	3.61799	2.6397	2.98366	3.22968		1.2277	1.0978	0.929844	1.01765	0.835548	0.976536	0.954273	1.12686	0.635014	1.02548	1.27885	0.859737	0.962551	1.10358	0.83052	1.16329	0.607	0.971723	1.15088	1.12225	1.13164	1.26853	1.01566	0.949325		1.28966	1.14533	1.40978	1.37496	0.752142	1.29157	1.86443	1.30753
26	4.03946	2.42495	4.01864	2.87597	3.22835	3.65823	3.59505	4.20453	2.81425	2.26785	3.10257	3.82725	2.5122	3.0134	3.23563		1.28704	1.03703	0.993281	1.02141	0.776997	1.03543	0.952027	1.1261	0.707792	1.13704	1.15224	0.911748	0.969587	1.09418	0.821317	1.24599	0.626993	0.913236	1.1452	1.11301	1.13929	1.21057	1.01878	0.956516		1.20713	1.12165	1.50844	1.37841	0.77635	1.29926	1.74417	1.25356
26.25	4.08694	2.36259	3.99446	2.8063	3.19296	3.4679	3.65939	4.07379	2.75934	2.27973	3.1284	3.91375	2.5286	3.045	3.30056		1.2217	1.14194	1.12829	0.98536	0.729731	1.00483	0.997155	1.20957	0.694988	1.08077	1.09004	0.935962	0.856786	1.0336	0.840847	1.21589	0.648022	0.931255	1.13732	1.0812	1.11676	1.26251	1.02495	0.983448		1.17734	1.06503	1.50896	1.37506	0.781491	1.27974	1.77028	1.32481
26.5	3.9955	2.37801	3.95463	2.78356	3.25919	3.60508	3.55686	4.15035	2.72076	2.32656	3.06358	3.87225	2.56429	3.04238	3.34482		1.23632	1.13377	1.06231	0.998426	0.722279	0.940265	1.01171	1.16211	0.650436	1.12479	1.09229	0.919156	0.998865	1.02835	0.822973	1.3622	0.659171	0.936018	1.13574	1.14639	1.12998	1.29867	0.999983	1.00224		1.19519	1.08238	1.41173	1.46189	0.834404	1.29967	1.82434	1.22453
26.75	3.90155	2.38343	4.15037	3.09933	3.29761	3.53994	3.54792	4.18802	2.75104	2.29499	3.15291	3.77865	2.48746	3.06259	3.34445		1.22962	1.15166	1.07553	1.06055	0.792625	0.940649	0.992933	1.1658	0.688229	1.11093	1.18927	0.869534	0.931003	1.01834	0.790202	1.19599	0.578868	0.938449	1.11568	1.13539	1.09995	1.23949	1.03975	1.04701		1.16614	1.08671	1.41132	1.34084	0.828835	1.29837	1.84898	1.16913
27	3.95829	2.26348	3.88401	3.03338	3.30493	3.63589	3.63579	4.19977	2.80362	2.28887	3.09066	3.80152	2.44082	3.07382	3.38891		1.27582	1.1773	1.10651	1.06068	0.813575	0.983744	1.00818	1.2119	0.713218	1.12403	1.18903	0.872481	0.874943	1.04623	0.851241	1.36478	0.617538	0.964595	1.11387	1.15224	1.10733	1.25405	1.03781	0.983312		1.13932	1.07037	1.47743	1.33484	0.873822	1.31319	1.74591	1.19389
27.25	4.08819	2.36108	4.08793	3.03141	3.32265	3.74524	3.53936	4.14257	2.69965	2.22523	3.20361	3.86294	2.46144	3.03966	3.28892		1.21631	1.14027	1.07786	1.0262	0.801823	1.03014	1.0029	1.18701	0.774525	1.18255	1.23413	0.875348	0.972991	1.05805	0.891824	1.32432	0.653902	0.918432	1.17309	1.14958	1.13338	1.31246	1.03223	1.03093		1.19989	1.08973	1.41101	1.38372	0.778278	1.28331	1.86749	1.16744
27.5	4.21342	2.31115	4.07835	3.14284	3.41115	3.89535	3.67823	4.2492	2.871	2.19731	3.29698	3.94389	2.59846	3.09762	3.47304		1.29984	1.15035	1.03571	1.04618	0.841126	1.00261	0.988231	1.13814	0.737874	1.12698	1.28642	0.900916	0.924421	1.03618	0.856207	1.19761	0.632168	0.962563	1.18293	1.08673	1.0979	1.36726	1.02035	0.986432		1.19964	1.07006	1.37499	1.39335	0.78599	1.3025	1.93208	1.27164
27.75	4.1143	2.34396	4.07545	3.23903	3.41834	4.20687	3.60846	4.21688	2.75283	2.20371	3.21357	3.98309	2.5094	3.02141	3.33944		1.31619	1.09942	1.01811	1.04563	0.788452	1.02492	1.0071	1.14541	0.772431	1.04297	1.16274	0.877419	1.03472	1.01748	0.916385	1.29422	0.636449	0.850753	1.18159	1.12707	1.14904	1.36859	0.987525	0.902517		1.25642	1.07785	1.41193	1.42344	0.720437	1.29157	1.88187	1.19772
28	3.9698	2.3162	3.92605	3.31096	3.45871	4.20467	3.57659	4.20781	2.72165	2.29805	3.30576	4.11174	2.50464	3.15336	3.44074		1.30097	1.1686	1.04052	1.00903	0.815917	1.01357	0.967389	1.1146	0.699986	1.05835	1.15901	0.861489	1.09578	1.0002	0.871698	1.42062	0.642047	0.932954	1.14892	1.10241	1.12872	1.3801	1.02111	0.995116		1.3183	1.10374	1.4238	1.35176	0.748929	1.30615	1.95552	1.2068
28.25	4.21976	2.39646	3.99068	3.44899	3.48193	4.12707	3.60153	4.32343	2.82517	2.18836	3.48785	4.16156	2.61898	3.13619	3.40786		1.31341	1.1587	1.02624	0.996511	0.894226	0.982287	0.995299	1.09529	0.753867	0.919172	1.14738	0.823178	1.14049	1.0386	0.846408	1.46868	0.674413	0.972988	1.16263	1.08705	1.15871	1.36528	1.02985	1.00461		1.28415	1.06378	1.40958	1.37782	0.865467	1.29181	1.94966	1.19906
28.5	4.39571	2.35126	4.0423	3.57463	3.3991	4.07165	3.67652	4.48726	2.80854	2.19887	3.42044	4.22788	2.50552	3.16801	3.34001		1.29679	1.15506	1.15354	1.08771	0.89248	0.98129	1	1.14589	0.674473	0.922815	1.17267	0.819434	1.13595	1.02122	0.837934	1.43421	0.64741	0.919698	1.16712	1.11171	1.14624	1.33556	1.01777	0.991859		1.26103	1.05837	1.37038	1.44518	0.778278	1.27351	2.01079	1.20191
28.75	4.36584	2.44964	4.07782	3.53112	3.56683	3.98338	3.65314	4.40776	2.70422	2.15643	3.3575	4.22813	2.58226	3.24477	3.35583		1.33238	1.16919	1.08784	1.08196	0.855135	0.962733	1.03677	1.11579	0.702223	0.947012	1.15377	0.860534	1.08602	0.980649	0.796822	1.35459	0.746107	0.963729	1.20137	1.12446	1.15587	1.31319	1.03754	0.942745		1.21708	1.08124	1.45123	1.40181	0.823265	1.25002	2.11666	1.22666
29	4.39696	2.42073	3.96826	3.83654	3.54955	3.91158	3.64979	4.20582	2.74593	2.16163	3.40269	4.26203	2.59335	3.21862	3.30734		1.286	1.15285	1.02207	1.06533	0.830693	0.953608	1.02572	1.08624	0.703746	0.916241	1.22	0.880526	1.14253	1.03077	0.760808	1.49781	0.648069	0.96243	1.16478	1.11191	1.1582	1.37408	1.05309	0.940981		1.2207	1.12309	1.45789	1.44636	0.846615	1.25229	2.15155	1.17626
29.25	4.26589	2.33231	4.01794	3.7375	3.69766	3.67586	3.60049	4.23503	2.757	2.16543	3.30541	4.30115	2.60808	3.3984	3.48395		1.30888	1.11325	1.07935	1.07519	0.825626	0.956445	1.01683	1.16211	0.684135	0.974694	1.27364	0.862366	0.978438	1.07003	0.828401	1.40508	0.661994	0.923728	1.18326	1.06194	1.12513	1.30587	1.06103	0.934536		1.30365	1.10927	1.42237	1.4084	0.837189	1.2697	2.02251	1.16646
29.5	4.36626	2.30726	3.89694	3.61791	3.75897	3.88728	3.74399	4.4933	2.78381	2.23149	3.33292	4.15535	2.62512	3.32447	3.51949		1.32585	1.17468	1.00849	1.03865	0.810382	1.02906	1.00449	1.13901	0.764958	0.932458	1.37827	0.862843	1.04085	1.05699	0.852301	1.52565	0.666792	0.910538	1.18207	1.12915	1.18645	1.29699	1.03887	0.987246		1.32398	1.1322	1.50793	1.3964	0.85647	1.2322	2.04102	1.18997
29.75	4.40956	2.35589	4.05461	3.74071	3.73437	4.00948	3.75091	4.16997	2.7284	2.26479	3.24957	4.06755	2.6449	3.39573	3.54814		1.31558	1.15577	0.945332	1.02333	0.853347	0.99954	0.930586	1.16916	0.66005	1.04832	1.36414	0.927599	1.00999	1.05442	0.880305	1.4839	0.669144	0.935685	1.22654	1.11783	1.12398	1.26826	1.02565	0.996201		1.18565	1.06019	1.4586	1.43072	0.890746	1.26063	2.05127	1.16771
30	4.33506	2.30432	3.99226	3.77737	3.79991	4.06475	3.84288	4.30701	2.61599	2.26548	3.33305	4.20207	2.68982	3.43795	3.50029		1.26111	1.14725	0.983946	1.07635	0.844021	1.00506	0.946188	1.15197	0.732876	1.06307	1.33841	0.877977	1.14503	1.03678	0.886461	1.49684	0.641012	0.901446	1.17433	1.13923	1.1756	1.30218	1.07259	1.00427		1.2472	1.08476	1.42053	1.4674	0.904456	1.23131	2.07777	1.20582
30.25	4.37202	2.30322	3.9891	3.82874	3.81593	4.02399	3.95383	4.41536	2.65338	2.32432	3.30959	4.07931	2.76641	3.57589	3.62752		1.26347	1.16824	0.942645	1.08114	0.82107	1.03006	0.954303	1.1697	0.693941	1.12057	1.30968	0.872322	1.08262	1.03744	0.870308	1.51691	0.595286	0.886791	1.20017	1.08835	1.14312	1.38006	1.06524	0.952717		1.33863	1.12661	1.32351	1.49248	0.940446	1.31028	2.05154	1.20297
30.5	4.44343	2.30335	4.12944	3.99534	3.88053	4.02548	3.85092	4.33639	2.54826	2.25346	3.45171	4.06992	2.74977	3.45239	3.59882		1.32367	1.10484	0.980339	1.08593	0.863567	1.05084	0.947985	1.15083	0.694321	1.03687	1.25056	0.855675	1.13777	1.02501	0.908971	1.49037	0.628028	0.960731	1.1953	1.10286	1.13223	1.37343	1.04759	0.974086		1.35879	1.06547	1.33917	1.43485	0.881534	1.22273	2.1104	1.23032
30.75	4.4708	2.45973	4.40169	3.92297	3.83953	3.98087	3.90513	4.46012	2.62165	2.1911	3.44948	4.29372	2.73165	3.52016	3.67288		1.24702	1.08898	1.00905	1.03776	0.884645	0.973162	0.951159	1.17312	0.671522	1.09057	1.23262	0.909598	1.0892	1.05598	0.952069	1.55883	0.723526	0.928024	1.23838	1.09909	1.13491	1.39279	1.06155	0.922393		1.27255	1.07628	1.40006	1.44085	0.939589	1.33968	2.17366	1.31234
31	4.33581	2.41779	4.56147	3.70464	3.90696	3.93266	3.8536	4.36637	2.54628	2.26776	3.45589	4.30916	2.83244	3.48344	3.70205		1.29792	1.16603	0.991231	1.05788	0.83674	1.00774	0.970653	1.15989	0.705888	1.03245	1.22903	0.917324	1.1734	1.07963	0.915988	1.58974	0.683634	0.929923	1.20629	1.13077	1.10311	1.33327	1.05869	0.937114		1.34694	1.11128	1.3539	1.44429	0.869323	1.23625	2.18644	1.27164
31.25	4.44861	2.43509	4.33829	3.81672	3.89876	4.27836	3.92397	4.49304	2.71058	2.2864	3.33438	4.38561	2.91674	3.60689	3.70758		1.31445	1.12136	1.01372	1.07354	0.847045	0.921402	1.00186	1.11422	0.712457	1.00024	1.22557	0.863401	1.01248	1.05977	0.922079	1.47386	0.712989	0.946576	1.17648	1.16174	1.11775	1.35541	1.0506	0.952785		1.33599	1.08633	1.36813	1.46573	0.872322	1.27497	2.14116	1.39927
31.5	4.5866	2.40297	4.31419	3.90978	4.02788	4.20624	3.99598	4.56623	2.6716	2.30805	3.50449	4.28996	2.86902	3.56516	3.68352		1.35691	1.10806	0.971358	1.04378	0.846278	0.955141	0.962448	1.11948	0.677662	1.0436	1.23495	0.872879	1.16636	1.06078	0.907249	1.65075	0.692619	0.914235	1.17228	1.17742	1.0951	1.28861	1.07738	0.979581		1.3564	1.09984	1.3364	1.4558	0.868252	1.36365	2.24757	1.38057
31.75	4.53362	2.38026	4.48567	3.74093	4.05179	4.42988	3.97572	4.61652	2.59057	2.2933	3.54815	4.25941	2.87815	3.56101	3.6973		1.33446	1.1148	1.02716	1.04926	0.794413	1.00077	0.99458	1.13814	0.70446	1.13039	1.28148	0.833851	0.982297	1.04093	0.891559	1.56433	0.703815	0.911871	1.18704	1.09428	1.12102	1.31803	1.09551	0.981412		1.31098	1.09123	1.3976	1.53368	0.863325	1.35231	2.15568	1.32766
32	4.37535	2.40738	4.61704	3.82918	4.12875	4.43364	3.93313	4.47766	2.5924	2.23962	3.5987	4.0954	2.8403	3.61903	3.83487		1.3188	1.08379	0.976308	1.06985	0.933146	0.986811	0.935168	1.14969	0.732067	1.19556	1.28348	0.91589	1.09419	1.05755	0.845217	1.70432	0.746201	0.922429	1.18541	1.1583	1.09861	1.31784	1.09021	1.06458		1.20112	1.06397	1.41633	1.52041	0.844473	1.34988	2.12678	1.3998
32.25	4.58502	2.33653	4.51345	4.08614	4.1437	4.21032	3.88934	4.7241	2.65521	2.35438	3.49245	4.11215	2.81982	3.55764	3.65884		1.29522	1.13072	1.0674	1.01621	0.871104	0.979449	0.930766	1.20707	0.682327	1.17112	1.3132	0.879331	1.15252	1.13819	0.88004	1.6001	0.737122	0.945777	1.21536	1.12798	1.11515	1.29303	1.1219	1.01099		1.23222	1.10223	1.43097	1.60773	0.901243	1.34988	2.05487	1.31199
32.5	4.39613	2.31804	4.56736	4.12724	4.1266	4.29145	3.90066	4.37631	2.59687	2.27676	3.48005	4.0611	2.71447	3.57104	3.70805		1.3396	1.10687	1.05955	1.02846	0.911301	1.02768	0.994789	1.20539	0.724642	1.07495	1.31808	0.935325	1.06196	1.15734	0.925389	1.64816	0.771322	0.92023	1.189	1.10755	1.0992	1.23671	1.10919	1.06628		1.30291	1.1366	1.42401	1.49503	0.901457	1.3707	2.13211	1.25098
32.75	4.51635	2.27734	4.5641	4.21506	4.01533	4.23485	3.89351	4.37838	2.73957	2.24556	3.61876	4.1418	2.7671	3.47113	3.745		1.32916	1.14134	1.06061	1.03694	0.919647	1.0503	0.947086	1.26776	0.756152	1.0998	1.31748	0.835205	1.04153	1.19816	0.924859	1.66467	0.751799	0.876898	1.1814	1.15224	1.07896	1.23576	1.1087	0.979242		1.23346	1.07025	1.38287	1.56495	0.895244	1.39208	2.169	1.3078
33	4.46796	2.28266	4.4147	4.04817	4.16111	4.20781	4.06114	4.46781	2.7218	2.33405	3.59696	4.12423	2.7916	3.59022	3.61823		1.34064	1.14915	0.999434	1.09037	0.898825	1.00169	0.900431	1.25659	0.741206	1.1515	1.2921	0.819036	1.12006	1.11601	1.01887	1.67697	0.698687	0.874001	1.19668	1.14665	1.09384	1.26247	1.04341	0.993488		1.26448	1.07741	1.40753	1.60271	0.928235	1.43484	2.14303	1.37086
33.25	4.44552	2.38352	4.4621	4.15041	4.17593	4.24442	4.06412	4.40508	2.71355	2.29974	3.68164	4.30654	2.72738	3.69432	3.80512		1.33829	1.18482	0.996181	1.09865	0.897249	0.990261	0.954603	1.23782	0.755914	1.08875	1.2609	0.817523	0.982978	1.18391	0.979874	1.67017	0.728936	0.920397	1.1888	1.16487	1.08748	1.26601	1.02218	1.01214		1.36735	1.08005	1.44366	1.59839	0.987789	1.38293	2.27181	1.3998
33.5	4.50492	2.3737	4.47986	3.93215	4.12509	4.15544	4.08727	4.29197	2.70636	2.25282	3.60072	4.32231	2.83244	3.61609	3.70842		1.3208	1.13627	1.00226	1.05453	0.889244	1.00115	0.932593	1.22112	0.73816	1.12831	1.41569	0.892473	1.15411	1.18169	0.947633	1.62259	0.713177	0.922995	1.19272	1.10553	1.10512	1.24124	1.04036	1.02259		1.34702	1.05642	1.42544	1.57636	0.956941	1.37491	2.18085	1.29827
33.75	4.4451	2.42541	4.62434	4.00044	3.99413	4.37282	4.0691	4.44379	2.80675	2.3203	3.65594	4.1262	2.80186	3.61582	3.66531		1.43383	1.13126	1.00813	1.05158	0.897505	1.03957	0.971432	1.25035	0.7433	1.06825	1.45657	0.912226	1.00772	1.1055	0.966634	1.52258	0.734958	0.901712	1.14448	1.1218	1.10354	1.2281	1.0946	1.01737		1.35838	1.0071	1.40375	1.58511	0.979649	1.35823	2.29072	1.386
34	4.77791	2.41899	4.58064	4.1048	4.08604	4.37799	4.07968	4.45045	2.85775	2.18059	3.62447	4.09802	2.76533	3.58134	3.66599		1.29853	1.19513	0.99703	1.02306	0.878258	1.02584	0.951428	1.29222	0.814984	1.08008	1.43204	0.842931	1.08171	1.08039	1.00219	1.55867	0.70438	0.901179	1.11907	1.09551	1.09909	1.25172	1.05161	0.956719		1.39911	0.991517	1.41572	1.56918	0.961868	1.41848	2.15701	1.30611
34.25	4.70949	2.41981	4.54599	4.01997	4.09948	4.38983	4.12063	4.66448	2.75094	2.20111	3.68324	4.18125	2.84692	3.66469	3.6221		1.3577	1.20808	1.03635	1.0444	0.927312	1.06457	0.904115	1.22963	0.771907	1.08126	1.37103	0.843887	1.10145	1.1199	0.960212	1.59605	0.721315	0.922196	1.16855	1.05517	1.12533	1.20447	1.06866	0.985211		1.42676	0.994408	1.40129	1.58039	1.02378	1.36462	2.23598	1.34467
34.5	4.52486	2.43652	4.62337	4.1835	4.15757	4.23179	4.09554	4.51119	2.75516	2.27562	3.71987	4.18402	2.80937	3.75474	3.6854		1.33116	1.21255	1.07489	1.08511	0.886476	1.04171	0.981823	1.26689	0.740064	1.10891	1.28184	0.831382	0.955288	1.11242	0.972195	1.61644	0.745354	0.9161	1.16597	1.08191	1.11337	1.21731	1.07161	0.991927		1.38479	1.02048	1.42053	1.65119	0.943873	1.42091	2.18258	1.32285
34.75	4.62982	2.54724	4.78421	4.31169	4.09481	4.34914	4.20821	4.45001	2.77656	2.23386	3.69981	4.13673	2.82665	3.71116	3.59595		1.39372	1.25197	1.13444	1.01683	0.942003	1.04701	0.936006	1.29222	0.776001	1.10932	1.35783	0.806531	1.09941	1.11964	1.00391	1.64153	0.722915	0.864408	1.13846	1.08601	1.08417	1.1983	1.08243	0.997083		1.39508	1.00025	1.4322	1.59868	1.10497	1.4725	2.13437	1.33221
35	4.57033	2.51205	4.64474	4.43325	4.1594	4.48805	4.19249	4.35738	2.74325	2.24784	3.72829	4.28335	2.8211	3.78389	3.64449		1.24693	1.2228	1.09632	0.96552	0.865227	1.0674	0.948913	1.34038	0.792089	1.0858	1.26573	0.830426	1.00295	1.13738	1.04694	1.63554	0.753869	0.877531	1.13421	1.09577	1.09932	1.15147	1.11762	0.921579		1.36266	1.05598	1.45962	1.53712	1.02249	1.38625	2.2469	1.3127
35.25	4.44919	2.51985	4.75783	4.4401	4.05027	4.49181	4.15146	4.51162	2.85809	2.25657	3.67906	4.06461	2.88163	3.71906	3.62502		1.29853	1.23688	1.12461	1.00192	0.798586	1.05314	0.945739	1.27915	0.828216	1.06643	1.22768	0.836241	0.894235	1.24909	1.05336	1.58149	0.728043	0.890921	1.09027	1.12817	1.12899	1.21259	1.10013	0.910182		1.45828	1.0837	1.3888	1.59524	1.13625	1.44756	2.27807	1.31991
35.5	4.63833	2.49062	4.8863	4.60501	4.09109	4.39665	4.23434	4.7158	2.70437	2.18178	3.73212	4.23344	2.84143	3.70081	3.67293		1.2954	1.2067	1.11641	0.954231	0.859223	0.98083	0.96724	1.26847	0.81884	1.08429	1.21792	0.846595	0.806627	1.22307	0.982059	1.68474	0.722538	0.880096	1.15609	1.11854	1.11834	1.17208	1.10127	1.00753		1.42084	1.00364	1.4193	1.62917	1.13368	1.3694	2.28286	1.37647
35.75	4.56666	2.57298	4.86933	4.68467	4.12938	4.5125	4.28416	4.83522	2.75243	2.13034	3.77495	4.26995	2.90603	3.80524	3.73524		1.26947	1.25066	1.15113	0.942943	0.869102	0.987731	0.984039	1.32243	0.776239	1.13497	1.13948	0.849144	0.957331	1.21403	0.871566	1.79301	0.722915	0.88709	1.15833	1.11048	1.13539	1.17178	1.05508	0.973882		1.3857	1.00572	1.45696	1.60144	1.06962	1.40188	2.275	1.42296
36	4.55882	2.58358	4.9402	4.7633	4.21151	4.49173	4.18534	4.623	2.67403	2.10928	3.65963	4.16091	2.87726	3.78389	3.71312		1.27869	1.27892	1.19052	1.01888	0.811531	1.02162	0.954633	1.30117	0.77581	1.11584	1.22892	0.881163	1.14117	1.20523	0.922476	1.70545	0.699722	0.847855	1.16631	1.09349	1.16648	1.17368	1.11118	0.95638		1.4131	1.06183	1.45901	1.67145	1.16774	1.43201	2.30377	1.3445
36.25	4.57125	2.54316	4.71096	4.741	4.29364	4.53132	4.27701	4.68487	2.76683	2.15999	3.6705	4.14294	2.8267	3.81537	3.80393		1.30123	1.27713	1.14335	0.982212	0.819707	0.971245	0.941337	1.33821	0.768004	1.14297	1.34044	0.891677	1.0379	1.15865	0.943595	1.69089	0.764595	0.832268	1.12447	1.11483	1.13559	1.21903	1.12974	0.946137		1.4512	1.035	1.47846	1.62199	1.04027	1.40528	2.43521	1.38003
36.5	4.39838	2.5338	4.50396	4.8482	4.31691	4.60641	4.30427	4.52968	2.82458	2.14861	3.75545	4.3879	2.86141	3.81031	3.81614		1.31089	1.24946	1.14894	1.04132	0.837506	0.973928	0.965832	1.29396	0.806892	1.07418	1.33103	0.855755	1.08829	1.21888	0.899901	1.67649	0.753164	0.865841	1.18307	1.05036	1.13953	1.16359	1.12827	0.899261		1.42989	1.04002	1.46239	1.62386	1.03128	1.4299	2.31629	1.42287
36.75	4.74829	2.58629	4.32861	4.97202	4.2561	4.55914	4.38596	4.85371	2.72805	2.20033	3.72293	4.2051	3.06755	3.78704	3.89139		1.31454	1.33552	1.26895	1.04604	0.839934	1.06817	0.976074	1.36924	0.82379	1.13768	1.35062	0.805655	1.03495	1.24	0.90864	1.60398	0.772875	0.861611	1.15757	1.15237	1.15279	1.21244	1.07807	0.916084		1.42841	1.03079	1.4238	1.63625	1.09512	1.46052	2.25569	1.38653
37	4.79843	2.52163	4.61845	5.23276	4.4015	4.61339	4.30903	4.80161	2.73217	2.03129	3.86429	4.34387	2.81315	3.79778	3.93701		1.31933	1.29932	1.24194	0.960457	0.863269	1.06549	1.00671	1.35552	0.716883	1.01548	1.31671	0.865233	1.25896	1.21847	0.830917	1.68539	0.746578	0.865941	1.16583	1.1352	1.12623	1.198	1.08285	0.89865		1.42034	0.989381	1.50496	1.62661	1.12339	1.4768	2.24864	1.58871
37.25	4.74395	2.48038	4.543	5.3267	4.54318	4.70142	4.28491	4.85043	2.77939	2.20079	3.77425	4.33137	3.00128	3.8473	4.00621		1.34473	1.38466	1.23154	0.991517	0.901593	1.06035	0.988561	1.34255	0.767481	1.01087	1.20486	0.893429	1.09578	1.2255	0.903211	1.60042	0.765959	0.856282	1.17056	1.09915	1.13342	1.19876	1.12733	0.900617		1.45614	1.0409	1.48777	1.64126	1.29692	1.5671	2.11533	1.65648
37.5	4.57509	2.53517	4.59145	5.1921	4.38371	4.83883	4.48001	4.67148	2.6565	2.00822	3.71346	4.30466	2.95002	3.85596	4.02829		1.32559	1.38693	1.2309	1.03872	0.860416	1.0648	1.04716	1.30302	0.737208	0.974932	1.17487	0.860454	1.05583	1.19488	0.91195	1.77618	0.717834	0.883993	1.16817	1.10455	1.10816	1.21221	1.07265	0.937657		1.48519	1.04606	1.54856	1.57066	1.0934	1.56759	2.16247	1.66744
37.75	4.61739	2.55155	4.38806	5.3987	4.41204	4.35581	4.37627	4.68617	2.8003	2.27781	3.78783	4.16948	2.94722	3.85193	4.16137		1.30714	1.40088	1.22143	1.01731	0.870678	1.07055	1.05037	1.28989	0.777	1.00988	1.12691	0.862127	1.06332	1.14536	0.934988	1.70982	0.696335	0.875233	1.18904	1.11106	1.12817	1.18946	1.08697	0.913371		1.45762	1.0448	1.44325	1.57331	1.23072	1.55811	2.20709	1.79631
38	4.79935	2.42087	4.6939	5.22715	4.29502	4.29584	4.47807	4.78061	2.50184	2.24615	3.70977	4.39263	2.95331	3.8376	4.05328		1.31628	1.4384	1.16167	1.06616	0.851899	1.123	1.02707	1.27649	0.771051	0.996396	1.17805	0.912943	0.993191	1.15218	1.0292	1.70562	0.699111	0.866573	1.21254	1.14457	1.10855	1.144	1.0857	0.912489		1.49934	1.06698	1.52523	1.5859	1.18809	1.53049	2.14143	1.78687
38.25	4.65001	2.39609	4.64624	5.16441	4.49934	4.62875	4.49311	4.73801	2.73168	2.10352	3.65643	4.39614	2.93755	3.84888	4.14832		1.3423	1.35192	1.17192	1.05911	0.825924	1.073	1.01285	1.26429	0.788519	1.0257	1.30787	0.851454	0.969133	1.11318	0.931678	1.63424	0.708002	0.841127	1.19358	1.13884	1.10879	1.15818	1.07438	0.908758		1.48889	1.11027	1.49606	1.47861	1.1069	1.54167	2.18192	1.75036
38.5	4.90756	2.38448	4.44319	5.19917	4.3166	4.10339	4.38298	4.53193	2.70343	2.22774	3.61221	4.41076	3.06534	3.84692	4.03846		1.35195	1.51312	1.21047	1.0223	0.874638	1.09455	1.04845	1.16602	0.823123	1.0098	1.32066	0.879092	0.990014	1.18406	0.875472	1.72633	0.699534	0.858746	1.22859	1.14515	1.11601	1.17487	1.07887	0.87104		1.45803	1.10977	1.46116	1.60006	1.16688	1.58468	2.21508	1.70769
38.75	4.89563	2.39164	4.48637	5.10902	4.36977	4.09861	4.37151	4.50523	2.7208	2.17054	3.57148	4.32443	2.9784	3.80987	4.03283		1.35213	1.4768	1.28571	1.06595	0.904531	1.0135	1.01108	1.27714	0.795754	1.02679	1.27682	0.816726	0.924875	1.17335	0.865343	1.58569	0.721739	0.841227	1.19162	1.12329	1.09853	1.20729	1.07403	0.909979		1.48782	1.10368	1.47273	1.57744	1.04049	1.57277	2.28659	1.74198
39	4.78358	2.39857	4.47468	5.30054	4.37677	4.28925	4.57219	4.82909	2.76117	2.09361	3.52427	4.42833	2.97241	3.85634	4.02834		1.32811	1.43434	1.26429	0.983307	0.895035	1.01917	0.990837	1.28062	0.770099	1.03986	1.37545	0.870968	1.08352	1.17967	0.819199	1.76906	0.647834	0.816513	1.17543	1.10182	1.10694	1.18725	1.08655	0.967031		1.454	1.06585	1.51755	1.57174	1.11183	1.67693	2.18791	1.7606
39.25	4.91198	2.38136	4.31578	5.33654	4.38314	4.03073	4.49401	4.73982	2.70238	2.1477	3.52176	4.34199	3.09338	3.80094	3.94499		1.39111	1.51002	1.33183	1.05008	0.904275	1.024	0.980895	1.21092	0.8117	1.02004	1.26919	0.791239	0.876986	1.15754	0.850778	1.7239	0.706732	0.893552	1.17209	1.10742	1.10137	1.19762	1.1032	0.913846		1.46042	1.0519	1.50803	1.65857	1.05463	1.63222	2.15794	1.66049
39.5	4.70657	2.33548	4.44214	5.39469	4.28789	4.10245	4.4357	4.64149	2.71872	2.06231	3.63324	4.33235	3.02548	3.90265	3.98413		1.36631	1.49243	1.28062	1.0379	0.963294	1.04049	0.965982	1.23674	0.772288	1.06709	1.37369	0.825727	0.845892	1.15789	0.866402	1.67632	0.695112	0.832101	1.23991	1.14034	1.13022	1.21008	1.09093	0.923818		1.46552	1.06019	1.58234	1.6391	1.16881	1.6127	2.21681	1.82535
39.75	4.80886	2.32823	4.38885	5.37196	4.23787	4.25108	4.44382	4.74916	2.63813	2.21431	3.63025	4.17667	3.04801	3.93533	3.86405		1.44671	1.57824	1.2971	1.03003	0.941151	0.974082	1.01632	1.21141	0.722833	1.06469	1.34801	0.80462	0.929868	1.159	0.85336	1.86988	0.782095	0.840661	1.23685	1.14958	1.11124	1.15398	1.11077	0.903059		1.56855	1.07949	1.60198	1.66467	1.06748	1.63756	2.14356	1.87166
40	4.81996	2.31515	4.34198	5.49125	4.47045	4.49886	4.53347	4.7343	2.66276	2.12477	3.74431	4.2791	3.1705	3.91044	4.00966		1.31463	1.47537	1.30262	1.01519	0.887796	1.05015	1.00183	1.19595	0.760722	1.16623	1.46088	0.84556	0.930549	1.19715	0.895134	1.79009	0.752693	0.839695	1.20829	1.11464	1.12122	1.18961	1.11752	0.907062		1.53514	1.05957	1.56934	1.64146	1.05506	1.67514	2.22626	1.92804
40.25	4.80235	2.52104	4.34567	5.44979	4.34372	4.43043	4.68926	4.99387	2.93461	2.21253	3.70336	4.3201	3.11704	3.95609	4.11383		1.31071	1.47114	1.4541	1.07197	0.902146	1.04171	1.00641	1.18945	0.767766	1.10875	1.33185	0.858941	1.05901	1.13884	0.954055	1.77812	0.745543	0.884792	1.22491	1.11373	1.11183	1.2209	1.1134	0.861407		1.5107	1.04317	1.59973	1.53997	1.15146	1.64226	2.25156	1.82517
40.5	4.90122	2.46455	4.51293	5.58599	4.38478	4.33456	4.57718	4.79141	2.59762	2.31687	3.70427	4.15821	3.17237	3.91665	4.17734		1.3784	1.52069	1.45926	1.06951	0.871359	1.07653	1.0309	1.18787	0.854205	1.16795	1.25715	0.846356	1.02134	1.10211	0.976167	1.82505	0.768782	0.882228	1.17371	1.12661	1.10311	1.24174	1.1255	0.890238		1.51662	1.10719	1.61611	1.61835	1.05227	1.68098	2.17632	1.76087
40.75	4.81921	2.51553	4.24648	5.49993	4.25421	4.55413	4.54241	4.84879	2.76877	2.26209	3.80043	4.03888	3.09328	3.89693	3.92453		1.34517	1.45086	1.41605	1.03708	0.901422	1.08435	1.04282	1.23972	0.916893	1.23698	1.14985	0.899004	0.997049	1.11489	1.00642	1.82279	0.741685	0.857447	1.22104	1.14236	1.08886	1.1922	1.10039	0.889288		1.51753	1.08816	1.59953	1.6331	1.00471	1.64923	2.19497	1.76345
41	4.68513	2.46666	4.07158	5.44432	4.36643	4.41844	4.64271	4.81578	2.69305	2.08351	3.57712	3.98228	3.03191	3.9386	3.94097		1.33299	1.45998	1.32687	1.01833	0.856924	1.10827	1.03123	1.27622	0.967728	1.22342	1.16036	0.889287	0.914889	1.15269	0.916452	1.87458	0.737922	0.834766	1.23303	1.11711	1.11491	1.1698	1.10899	0.896072		1.55695	1.07471	1.55685	1.66811	0.966795	1.70851	2.20788	1.7549
41.25	5.08285	2.49342	4.21263	5.56122	4.33691	4.56706	4.6655	4.9714	2.77398	2.1107	3.71374	4.16328	3.12224	3.9769	3.87167		1.31628	1.3954	1.46627	1.06472	0.917603	1.17905	0.967569	1.24829	0.959256	1.29357	1.26475	0.834727	0.915343	1.14875	0.912082	1.7642	0.743143	0.845091	1.23127	1.09499	1.11475	1.23713	1.11848	0.914117		1.49934	1.08219	1.57998	1.61815	0.889674	1.68422	2.16287	1.77921
41.5	4.7991	2.51966	4.21351	5.54533	4.33394	4.29388	4.75799	4.84412	2.64846	2.14409	3.73623	3.99477	2.98257	3.96813	3.95465		1.31384	1.41967	1.38472	1.0782	0.930719	1.1424	0.98359	1.31441	0.997525	1.26882	1.2183	0.862764	0.935542	1.22443	0.921086	1.7409	0.735664	0.880096	1.21331	1.1147	1.13602	1.24026	1.14593	0.937521		1.52263	1.0546	1.5548	1.57774	0.990574	1.73937	2.13038	1.67278
41.75	4.78976	2.47859	4.17455	5.73196	4.26014	4.42385	4.7623	4.96656	2.77835	2.10955	3.79277	4.12023	2.93834	4.02795	3.91806		1.37188	1.38723	1.43501	1.06752	0.903764	1.02001	0.97823	1.31565	1.13018	1.45398	1.16326	0.890721	0.930095	1.24838	1.01595	1.75206	0.719481	0.892786	1.19974	1.07371	1.12805	1.21229	1.13335	0.931619		1.63241	1.05171	1.61068	1.65257	1.01392	1.7192	2.17472	1.64776
42	4.83956	2.49768	4.3112	5.60173	4.3663	4.55491	4.8428	4.92673	2.7994	2.07442	3.68895	4.07073	3.11734	4.06919	4.05229		1.31506	1.40846	1.44208	1.08203	0.916071	1.08443	0.967629	1.30931	1.113	1.34947	1.08719	0.814576	0.905583	1.24535	0.938232	1.83897	0.686974	0.863276	1.23208	1.13123	1.1842	1.19754	1.14883	0.864935		1.49794	1.0524	1.60014	1.61166	1.06127	1.71726	2.06019	1.63903
42.25	5.02937	2.50397	4.37663	5.60581	4.29515	4.62084	4.93253	5.3179	2.74618	2.06117	3.92278	4.19383	3.18587	4.09376	4.07364		1.33655	1.41078	1.41308	0.996716	0.962102	1.10091	0.960801	1.33116	0.941025	1.22686	1.08694	0.842055	0.953246	1.16891	0.894009	1.89432	0.645905	0.863209	1.19248	1.09362	1.08997	1.23827	1.16145	0.89017		1.56007	1.05253	1.54365	1.73419	1.08462	1.76415	2.1919	1.58488
42.5	5.20816	2.39604	4.50202	5.6502	4.41563	4.63879	4.65887	5.33042	2.80213	2.1657	3.80872	4.0816	3.19108	4.03606	4.01738		1.33577	1.43219	1.42786	1.03708	0.948987	1.15766	0.946637	1.31283	0.892808	1.23882	1.19161	0.841577	0.783477	1.14385	0.854022	1.67114	0.710166	0.924727	1.18474	1.11653	1.11361	1.23126	1.17002	0.923411		1.60599	1.0514	1.56156	1.7453	1	1.71151	2.25569	1.71758
42.75	5.0856	2.41568	4.05733	5.72584	4.28525	4.91134	4.94303	5.33535	2.68997	2.23665	3.80078	4.02638	3.11714	4.14088	4.06889		1.36248	1.44155	1.47737	1.01601	0.945537	1.11387	0.977541	1.24135	0.972774	1.15344	1.13182	0.810115	0.897186	1.15769	0.887852	1.76647	0.759326	0.896283	1.22907	1.17534	1.11001	1.20783	1.19096	0.896751		1.5367	1.0612	1.58704	1.77923	0.962511	1.83899	2.23905	1.61097
43	4.95345	2.41798	4.277	5.88755	4.37614	4.72337	4.82612	5.17861	2.90089	2.13367	3.80719	4.04059	3.04954	4.09664	4.03152		1.35213	1.48956	1.4645	1.0325	0.930506	1.15727	0.980745	1.22437	0.910277	1.20864	1.14935	0.890163	0.900363	1.11717	0.911751	1.86584	0.759373	0.946776	1.26642	1.146	1.09778	1.22421	1.19182	0.908622		1.54156	1.07898	1.5766	1.75602	1.02806	1.7546	2.24797	1.70903
43.25	5.1576	2.38756	4.22731	5.65377	4.42642	4.78373	4.88056	5.1939	2.6499	2.10256	3.57204	4.19031	3.17689	4.15564	4.08867		1.33516	1.35675	1.43027	0.999726	0.876001	1.0523	0.984788	1.25502	0.98453	1.30708	1.16713	0.880685	0.987063	1.13925	0.919431	1.81858	0.73778	0.952804	1.31748	1.12648	1.14135	1.26095	1.18092	0.953938		1.57349	1.07094	1.61437	1.81119	1.0437	1.71604	2.21641	1.79827
43.5	5.42558	2.31395	4.27216	5.85578	4.38384	4.8172	4.77176	5.30951	2.89196	2.0773	3.64856	4.20502	3.04252	4.12715	4.04086		1.40233	1.41132	1.54038	1.02709	0.889244	1.12384	1.00087	1.25241	1.04655	1.29716	1.198	0.878534	0.982978	1.22322	1.01887	1.82117	0.727337	0.959466	1.31399	1.16155	1.12039	1.22238	1.16434	0.907876		1.61118	1.04819	1.5239	1.93126	1.08312	1.7618	2.30124	1.75944
43.75	5.32204	2.41261	4.25615	5.69327	4.29502	4.83248	4.88525	5.39074	2.68317	2.16396	3.62614	4.09573	2.98724	4.1162	4.04426		1.428	1.44513	1.48069	1.02052	0.923011	1.10981	0.99455	1.33458	0.89752	1.32018	1.28996	0.890641	0.79074	1.16552	0.976829	1.79803	0.714024	0.92506	1.34408	1.13422	1.10986	1.27733	1.1282	0.964656		1.59488	1.03651	1.60536	1.83686	1.00793	1.6783	2.1979	1.7573
44	5.30936	2.37049	4.21324	5.72941	4.41696	4.6373	4.83699	5.3503	2.81733	2.11234	3.75545	4.10945	3.03878	4.12481	4.23715		1.33072	1.39092	1.44059	0.983786	0.864333	1.12039	0.951728	1.3617	0.871246	1.27959	1.27737	0.982397	1.04925	1.21731	0.944455	1.88056	0.748883	0.965161	1.36863	1.18432	1.12714	1.21229	1.14445	0.945458		1.62056	1.06221	1.59114	1.84915	1.10154	1.75443	2.21894	1.78669
44.25	5.19965	2.38434	4.31279	5.73925	4.36119	4.84252	4.88629	5.31288	2.8354	2.07022	3.73122	4.04476	2.97639	4.19781	4.09561		1.35648	1.3843	1.4169	0.94698	0.888562	1.14148	0.97233	1.2811	0.817412	1.20409	1.22428	0.962246	0.834544	1.2497	0.92049	1.79301	0.783365	0.919198	1.40698	1.14762	1.10366	1.21293	1.18151	0.912353		1.52354	1.06849	1.55685	1.76753	1.15403	1.75403	2.14915	1.6979
44.5	5.43951	2.50209	4.23338	5.77649	4.39343	4.99138	4.76484	5.39661	2.87264	2.10512	3.79117	4.12946	2.91359	4.21388	4.15672		1.38345	1.36015	1.44604	0.998221	0.865568	1.11817	0.961011	1.29005	0.744681	1.22694	1.07588	1.01736	0.86246	1.2168	0.938961	1.799	0.829233	0.900979	1.3916	1.11692	1.11917	1.20745	1.13025	0.948782		1.59151	1.08627	1.52768	1.86852	1.06662	1.68673	2.0554	1.6767
44.75	5.24479	2.49479	4.2165	5.9726	4.4355	5.15803	4.88331	5.17835	2.93297	2.11581	3.78741	4.03259	2.95032	4.14644	4.06586		1.37953	1.38108	1.45806	1.05234	0.857946	1.1036	0.99997	1.29575	0.806559	1.15467	1.04977	0.950617	0.931911	1.21155	0.911619	1.78443	0.847391	0.968558	1.41525	1.17014	1.07868	1.23961	1.16296	0.926396		1.64796	1.08074	1.49893	1.89026	1.22322	1.72439	2.11226	1.72916
45	5.36726	2.44721	4.15389	6.06129	4.5387	5.43952	4.82493	5.59872	2.85363	2.0873	3.66945	4.09205	2.93642	4.26591	4.1156		1.38806	1.30856	1.38543	0.998084	0.894098	1.1062	0.984428	1.31473	0.766957	1.22706	0.999479	0.942732	0.965956	1.20993	0.968222	1.78216	0.824717	0.960265	1.3852	1.1324	1.13807	1.16774	1.20656	0.915542		1.62039	1.06265	1.54334	1.85436	1.21423	1.68195	2.23718	1.69638
45.25	5.27057	2.40697	4.18405	5.99548	4.50243	4.82237	4.69328	5.23019	2.94623	2.05697	3.87034	4.06404	2.90687	4.30361	4.10527		1.3764	1.38395	1.47178	0.938633	0.92497	1.07177	1.0209	1.3528	0.732734	1.20362	1.02192	0.938351	0.879483	1.19058	0.926382	1.89108	0.77438	0.969391	1.45155	1.11314	1.08926	1.15139	1.19599	0.889288		1.61052	1.10814	1.52605	1.78995	1.18359	1.75508	2.26981	1.56172
45.5	5.36234	2.50929	4.16998	6.01071	4.54772	5.20726	4.92323	5.24669	2.93967	1.97789	3.72168	4.15209	2.85507	4.32142	4.1597		1.32707	1.35049	1.58989	1.05063	0.858712	1.20052	1.02749	1.40368	0.721691	1.22827	1.00774	0.934369	0.876759	1.18664	0.907646	1.83331	0.793997	0.944178	1.41343	1.15992	1.12919	1.13505	1.17381	0.906994		1.6236	1.10789	1.57128	1.77481	1.18488	1.77679	2.28526	1.74448
45.75	5.4285	2.50016	4.15283	6.05604	4.51454	5.40245	4.96441	5.39091	2.92746	1.99379	3.9351	4.13428	2.89705	4.31352	4.06973		1.34499	1.32359	1.51061	0.988917	0.844149	1.05636	1.04285	1.3329	0.749108	1.31395	0.984636	0.89311	0.913754	1.2067	0.910295	1.86357	0.750529	0.93312	1.43263	1.15452	1.11897	1.16664	1.1826	0.898447		1.6589	1.10336	1.53618	1.75838	1.19837	1.78367	2.1666	1.69567
46	5.51118	2.53921	4.07686	5.9718	4.45632	5.13796	4.97312	5.45252	2.95124	2.05893	3.78985	4.11255	2.86263	4.37639	3.98732		1.3771	1.36975	1.53826	0.991859	0.849813	1.07024	0.982033	1.32476	0.736018	1.46998	0.935802	0.882437	0.870858	1.15789	0.828467	1.782	0.709037	0.930389	1.40612	1.11841	1.06858	1.15802	1.16323	0.900889		1.58114	1.07006	1.53014	1.88544	1.30613	1.77355	2.16394	1.6368
46.25	5.52812	2.49892	4.06085	6.04686	4.61875	5.00815	5.05227	5.51283	2.80561	2.08429	3.78769	4.06338	2.91492	4.40613	4.18893		1.31184	1.40363	1.4826	0.959226	0.90172	1.19178	0.99994	1.33756	0.765434	1.47634	0.943868	0.974831	0.859737	1.14481	0.874015	1.85936	0.83182	0.910305	1.38487	1.19883	1.15026	1.17414	1.18893	0.918662		1.65973	1.04889	1.56156	1.7932	1.20201	1.73702	2.24238	1.57775
46.5	5.37527	2.4635	4.18827	6.12651	4.67123	5.04523	5.02085	5.3649	2.92666	2.03591	3.88093	4.07849	2.91983	4.42537	4.17108		1.35535	1.40345	1.42687	0.984539	0.809019	1.11456	0.948823	1.29803	0.734971	1.35577	0.908011	0.944962	0.900363	1.09797	0.891956	1.83234	0.806276	0.942812	1.40784	1.13448	1.13476	1.17692	1.17539	0.932976		1.63306	1.01898	1.54764	1.78523	1.32219	1.70301	2.21721	1.55433
46.75	5.54739	2.52581	4.06173	6.28378	4.79777	4.82512	5.03172	5.70587	2.9424	2.07282	3.91881	3.95581	3.15479	4.43332	4.30181		1.35935	1.35717	1.44059	1.01136	0.787941	1.10352	0.952566	1.31544	0.679661	1.35252	0.966584	0.999442	0.943486	1.1206	0.907448	1.86745	0.874347	0.955869	1.44108	1.11451	1.0846	1.18409	1.16212	0.908283		1.54543	1.04669	1.47672	1.8581	1.31834	1.75063	2.19763	1.54168
47	5.3721	2.52572	4.3754	6.1287	4.80262	5.36137	5.13962	5.69446	3.07503	1.98748	3.86923	4.03529	3.29456	4.48289	4.33187		1.32367	1.36862	1.38126	0.975303	0.774357	1.07798	0.953914	1.29526	0.726831	1.39911	1.03396	0.984229	0.866092	1.09448	0.90758	1.9029	0.882204	0.918865	1.39241	1.10195	1.08855	1.15334	1.20703	0.964724		1.66738	1.02859	1.45481	1.75307	1.34105	1.80141	2.17446	1.53162
47.25	5.53354	2.52122	4.08292	6.17767	4.8206	5.54151	5.08065	5.66405	2.99071	2.05875	3.83629	4.06191	3.22819	4.53552	4.30531		1.28818	1.32335	1.39915	1.0301	0.78381	1.07591	0.973888	1.28707	0.777476	1.37967	1.06606	0.982397	0.940309	1.08453	0.915789	1.80919	0.832902	0.906875	1.46306	1.14841	1.04909	1.15074	1.13119	0.941456		1.6975	1.05793	1.39556	1.74796	1.265	1.75848	2.1947	1.41895
47.5	5.45328	2.54596	3.93044	6.21134	4.85157	5.58713	5.11058	5.60572	3.01748	2.10521	3.7746	3.91121	3.2872	4.52239	4.37289		1.35239	1.33701	1.43331	1.03523	0.78909	1.05023	0.978948	1.2894	0.767005	1.36113	1.06771	1.00653	1.00976	1.0863	0.950017	2.02136	0.881216	0.901179	1.40139	1.18543	1.04455	1.18546	1.14423	0.899396		1.64598	1.04361	1.41173	1.74658	1.27164	1.64591	2.19856	1.4845
47.75	5.42833	2.52067	4.19179	6.32925	4.86476	5.48177	5.06933	5.77275	3.06187	2.12148	3.83727	4.21016	3.2166	4.52086	4.38359		1.28382	1.30487	1.41959	1.0011	0.792965	1.0901	0.933791	1.28132	0.732829	1.31488	1.01432	1.01171	1.069	1.10403	0.876266	1.98997	0.801101	0.925793	1.43306	1.13682	1.0719	1.18691	1.16945	0.880469		1.6287	1.04744	1.39689	1.80411	1.32091	1.75209	2.19776	1.54043
48	5.32955	2.58133	4.04581	6.29026	4.72283	5.61707	5.13233	5.69222	3.1355	2.14222	3.73512	3.89243	3.18042	4.51209	4.35103		1.35491	1.34584	1.3681	0.942943	0.759496	1.06089	0.954782	1.26673	0.677852	1.29106	0.978464	0.979052	0.940763	1.09095	0.907382	1.96488	0.755328	0.922928	1.40168	1.1758	1.03417	1.13459	1.12031	0.902788		1.58163	1.03217	1.47549	1.80519	1.22708	1.73572	2.20775	1.5252
48.25	5.14192	2.64378	4.47881	6.41175	4.46786	5.46861	5.12637	5.66768	3.19662	2.14816	3.78351	3.90558	3.13182	4.45271	4.16534		1.34377	1.36093	1.40637	1.03537	0.806464	1.08143	0.980026	1.28886	0.700176	1.22181	0.936872	0.942971	1.01861	1.12131	0.974578	1.972	0.781531	0.915168	1.42953	1.12017	1.0627	1.13421	1.13045	0.884675		1.66705	1.0382	1.38031	1.8579	1.31384	1.7077	2.3027	1.62362
48.5	5.43976	2.61726	4.59488	6.32364	4.55769	5.82057	5.07082	5.70319	3.20765	2.1191	3.64028	3.85347	3.18965	4.3814	4.11409		1.37527	1.35228	1.40785	1.00321	0.809743	1.10521	0.991286	1.33583	0.774858	1.15463	0.957942	0.945918	1.00794	1.11156	0.938563	1.80337	0.790704	0.920264	1.44013	1.17502	1.0277	1.17845	1.11424	0.907605		1.68754	1.06151	1.45093	1.79221	1.21187	1.80384	2.26541	1.53723
48.75	5.29092	2.66778	4.49156	6.2386	4.77153	5.72603	4.97118	5.64668	3.18481	2.06569	3.73317	4.00899	3.14934	4.59027	4.32984		1.34717	1.37112	1.42171	1.00684	0.821921	1.05383	0.970204	1.32444	0.702746	1.0879	0.91904	1.0458	0.938266	1.15228	0.9524	2.00113	0.775603	0.932754	1.43688	1.16435	1.06744	1.16797	1.13318	0.942406		1.65775	1.01785	1.46812	1.81601	1.21251	1.7371	2.29951	1.43659
49	5.28867	2.68352	4.38648	6.34201	4.72018	5.86533	4.94981	5.67873	3.08501	2.05003	3.84451	3.88785	3.11071	4.42934	4.31501		1.30932	1.3676	1.45714	0.960936	0.83674	1.03412	0.949302	1.32802	0.669142	1.13241	0.938765	0.944405	1.01339	1.14617	0.911354	1.86211	0.79856	0.948042	1.43836	1.1434	1.05256	1.15928	1.13097	0.955566		1.65775	0.979705	1.57599	1.85141	1.03342	1.67733	2.17246	1.52316
49.25	5.46187	2.75332	4.52067	6.52813	4.78622	5.8339	4.97059	5.62559	3.1424	2.11225	3.8482	3.83427	2.99195	4.47243	4.34549		1.35091	1.40577	1.5326	1.00376	0.801269	1.07047	0.887375	1.29211	0.726927	1.09217	0.92749	0.969335	0.999773	1.12864	0.923337	1.91843	0.776544	0.956368	1.4056	1.11262	1.02056	1.16119	1.0999	0.913914		1.63932	1.01696	1.546	1.85505	1.15317	1.7107	2.10534	1.40328
49.5	5.35283	2.7418	4.33635	6.49395	4.88608	5.81492	4.89999	5.86175	3.12006	2.01786	3.78755	3.88214	3.09858	4.42961	4.3611		1.3222	1.39993	1.45184	1.00575	0.735863	1.15773	0.925585	1.34082	0.735352	1.10245	0.961481	0.941617	0.988879	1.1397	0.974313	1.92669	0.7677	0.946576	1.43855	1.11327	1.05828	1.1807	1.10475	0.889017		1.59949	0.983789	1.47334	2.04799	1.08162	1.71694	2.17286	1.43249
49.75	5.57375	2.78126	4.49393	6.50671	4.95338	5.94301	4.62149	5.99585	3.2212	2.04144	3.9124	3.98187	3.03972	4.44803	4.47273		1.37814	1.39611	1.45573	0.962783	0.767331	1.05981	0.964485	1.33013	0.791328	1.11049	0.970453	1.01043	0.943486	1.10752	0.977756	1.89286	0.789199	0.926859	1.44973	1.15934	1.05662	1.18573	1.12549	0.895258		1.68038	1.0159	1.40446	1.88966	0.966153	1.709	2.24451	1.34966
50	5.48298	2.69605	4.39694	6.49337	4.94153	5.97539	4.67809	5.90944	3.1434	2.03815	4.02841	3.84554	3.06421	4.45124	4.43839		1.36918	1.36766	1.47313	0.976055	0.766053	1.13335	0.935557	1.34364	0.653006	1.03243	0.981152	1.01274	1.03722	1.13758	0.907911	1.82521	0.769017	0.903078	1.43378	1.12362	1.03307	1.2172	1.11861	0.859304		1.7091	0.985485	1.38809	1.9346	0.995287	1.77193	2.33626	1.399
50.25	5.61046	2.54591	4.5503	6.66419	5.02277	5.82527	4.94177	5.97771	3.19161	1.99762	4.08774	4.04182	3.10432	4.67297	4.53979		1.39737	1.41734	1.48635	0.984949	0.777721	1.14945	0.966491	1.23218	0.650721	1.12532	1.03586	0.980884	1.04085	1.14071	0.918504	1.89076	0.699064	0.927858	1.41505	1.18497	1.06606	1.18794	1.14948	0.930873		1.74284	1.02482	1.43158	2.02095	1.08012	1.67085	2.27354	1.39045
50.5	5.62114	2.64879	4.36177	6.61259	4.96966	5.92631	4.80847	5.89959	3.21018	2.03175	4.13572	3.96079	3.09996	4.65815	4.43354		1.42626	1.42009	1.49427	1.05316	0.756898	1.11924	0.933162	1.26565	0.698082	1.16199	1.05471	0.889207	0.932819	1.07114	0.938762	1.81243	0.749777	0.926692	1.37193	1.11633	1.05236	1.22905	1.11541	0.92816		1.75049	0.992209	1.39136	1.92025	1.16045	1.66883	2.22093	1.39562
50.75	5.60729	2.57541	4.20348	6.66922	4.93522	5.79682	4.73766	6.00277	3.10745	1.97802	4.05898	4.00433	3.11056	4.45636	4.38046		1.39798	1.46702	1.55	0.982076	0.779382	1.14408	0.950919	1.25892	0.675187	1.16435	1.02	0.946794	0.922833	1.18149	0.812049	1.86227	0.722586	0.917133	1.38587	1.11633	1.03761	1.19864	1.11749	0.933519		1.69733	0.974175	1.41541	1.8995	1.08033	1.72179	2.35038	1.44906
51	5.5146	2.54582	4.22081	6.74005	5.08913	5.84558	4.74317	5.84118	3.02532	1.95125	4.12729	3.98285	3.27792	4.65929	4.46125		1.39615	1.43273	1.55636	1.00014	0.811191	1.06403	0.936995	1.18901	0.659955	1.22413	1.00104	0.964237	0.819791	1.16269	0.832506	1.80628	0.74018	0.924094	1.40794	1.11594	1.04597	1.20184	1.10272	0.893698		1.75074	0.99491	1.38665	1.9174	1.01457	1.65255	2.34572	1.46295
51.25	5.5005	2.47492	3.99182	6.61223	5.03198	5.81187	4.88279	5.77681	2.9645	1.78012	4.2903	4.11942	3.30571	4.60013	4.38698		1.40451	1.49958	1.54859	0.983581	0.785003	1.07423	0.933371	1.17637	0.624685	1.20882	0.911276	1.0505	0.925556	1.18012	0.843363	1.85936	0.727666	0.96686	1.37589	1.11574	1.05907	1.17818	1.14676	0.890442		1.69758	0.999057	1.36179	1.92979	1.10004	1.71029	2.29937	1.46731
51.5	5.51101	2.5326	4.04195	6.8259	5.11897	5.68786	4.86216	5.88983	3.10928	1.89442	4.17687	4.31438	3.46281	4.58787	4.49068		1.37536	1.48229	1.5954	0.956147	0.782405	1.15842	0.95607	1.18549	0.683612	1.10738	0.935364	1.00255	1.1128	1.14031	0.777094	1.83217	0.725455	0.878131	1.39036	1.13644	1.01736	1.18359	1.10506	0.867173		1.7923	0.988941	1.36445	2.06992	1.02378	1.66243	2.31682	1.48317
51.75	5.50425	2.53939	3.97881	6.98054	5.13379	5.72243	4.88324	5.91714	3.05536	1.8994	4.21162	4.1311	3.32824	4.66926	4.52429		1.39311	1.45915	1.64356	0.953274	0.810169	1.16272	0.912978	1.20333	0.656052	1.1832	0.903923	1.07145	1.00999	1.1583	0.800331	1.89416	0.751376	0.942879	1.41802	1.12882	0.998066	1.15974	1.12344	0.912353		1.83476	0.997298	1.3539	2.01524	0.941088	1.69669	2.26129	1.42109
52	5.61831	2.5761	4.18721	7.03389	5.06011	5.79713	4.77951	6.03042	2.9995	1.96647	4.1706	4.09818	3.19677	4.65216	4.45311		1.37675	1.42062	1.72546	0.998221	0.849855	1.12077	0.857789	1.20241	0.650864	1.19544	0.911824	1.06571	1.07694	1.13799	0.810262	1.84027	0.77438	0.92949	1.38831	1.12375	1.03271	1.17144	1.10139	0.953395		1.80555	0.976814	1.4147	1.96568	1.15189	1.71426	2.30603	1.45164
52.25	5.58226	2.57977	4.16884	7.13978	5.2961	5.70111	5.01236	5.84879	3.16966	1.94203	4.27414	4.11419	3.19593	4.73289	4.54225		1.33708	1.48831	1.66443	0.986659	0.863056	1.18557	0.898545	1.18619	0.618116	1.20015	0.919643	1.13485	1.05061	1.13187	0.851308	1.82182	0.762243	0.886824	1.38425	1.12668	1.00154	1.15452	1.12173	0.86602		1.77781	0.93038	1.34562	1.99587	1.16131	1.70333	2.39752	1.46108
52.5	5.48907	2.63424	3.91435	7.27051	5.31433	5.61558	4.64979	5.80861	3.07944	1.97898	4.21628	4.05734	3.13565	4.90586	4.61714		1.42991	1.39939	1.59003	0.938838	0.875703	1.19745	0.908487	1.25475	0.677234	1.21884	0.882469	1.12075	1.04221	1.12904	0.858656	1.85208	0.756692	0.904543	1.41138	1.16851	1.02967	1.14922	1.11635	0.919341		1.81443	0.916054	1.41101	2.14908	1.04263	1.67871	2.3075	1.37006
52.75	5.35083	2.63172	4.18255	6.99891	5.29206	5.67806	4.66595	5.72833	3.11753	1.97821	4.36878	4.03863	3.17016	4.86239	4.62512		1.34638	1.45521	1.55764	1.01936	0.880898	1.1789	0.894472	1.24368	0.601552	1.14514	0.890617	1.19235	1.00499	1.08018	0.768355	1.84431	0.737922	0.921929	1.44066	1.13644	1.00036	1.17083	1.14106	0.934265		1.76934	0.955514	1.38727	2.01731	1.1973	1.67255	2.28552	1.40631
53	5.52736	2.60864	4.15635	7.25091	5.08705	5.568	4.93894	5.79202	3.157	1.93015	4.32526	4.40684	3.15735	4.84283	4.547		1.41564	1.40512	1.49491	0.96463	0.867229	1.13872	0.922082	1.17296	0.623923	1.17766	0.952593	1.19737	1.03995	1.12641	0.785104	1.82311	0.677471	0.918332	1.39925	1.1419	1.03216	1.17064	1.12587	0.860118		1.75477	0.980333	1.37182	1.98299	1.26821	1.69847	2.32561	1.35207
53.25	5.32396	2.52944	4.33688	7.23087	5.30284	5.75198	4.72239	5.87091	3.01932	1.94833	4.37302	4.25615	3.30802	4.73742	4.75226		1.40042	1.42903	1.56386	0.95601	0.884986	1.10375	0.934539	1.17068	0.671093	1.20362	0.975309	1.18041	0.972991	1.13884	0.830917	1.77148	0.705979	0.897782	1.4216	1.116	0.994081	1.17635	1.11023	0.923275		1.7212	0.943387	1.37171	2.0827	1.30463	1.73321	2.33267	1.30228
53.5	5.46755	2.55752	4.33811	7.24151	5.3458	5.65619	4.73788	5.9676	3.20864	2.00366	4.33605	4.30842	3.29697	4.82463	4.72079		1.39389	1.40834	1.56082	1.00759	0.905808	1.25443	0.902318	1.22041	0.661145	1.19181	0.998272	1.25504	1.06105	1.16805	0.808673	1.78832	0.674413	0.90854	1.36605	1.19993	0.996883	1.20005	1.10131	0.922054		1.73083	0.966007	1.36619	2.05114	1.27935	1.79752	2.46517	1.31778
53.75	5.66811	2.54279	4.24261	7.31533	5.43392	5.60908	4.75158	5.87341	3.17627	1.95824	4.44238	4.23025	3.18415	4.87786	4.76217		1.37849	1.43058	1.46584	0.967162	0.843425	1.1904	0.992334	1.22291	0.693036	1.14409	1.11034	1.16758	1.09056	1.15436	0.827143	1.7197	0.716282	0.875699	1.45766	1.17911	0.968826	1.165	1.14871	0.845804		1.81394	0.966635	1.38451	1.92536	1.27528	1.80546	2.31495	1.35189
54	5.5987	2.65773	4.29406	7.1389	5.32341	5.61731	4.80594	5.96526	2.98312	1.98894	4.37121	4.41297	3.24189	4.86282	4.60727		1.3436	1.44144	1.55	0.975371	0.836144	1.23971	0.987752	1.22974	0.665524	1.24124	1.0307	1.17563	1.02043	1.09312	0.819993	1.87393	0.755892	0.927824	1.46587	1.17332	1.01866	1.1653	1.12743	0.841395		1.77872	0.941816	1.43752	1.93637	1.22558	1.79396	2.39819	1.41494
54.25	5.83089	2.58454	4.21333	7.23218	5.28871	5.80317	4.78695	6.09323	3.1637	1.94874	4.5125	4.50657	3.27812	4.82393	4.71719		1.38589	1.38675	1.55898	0.929945	0.833418	1.30649	1.00955	1.20306	0.647389	1.3503	1.07951	1.28841	1.19814	1.09216	0.832307	1.82926	0.705556	0.936784	1.4332	1.1512	0.993568	1.21305	1.0804	0.898921		1.82176	0.947785	1.39935	2.00148	1.25793	1.82166	2.44094	1.40203
54.5	5.75163	2.6637	4.28887	7.23065	5.30253	5.66505	4.71182	6.04511	3.16361	1.88898	4.32602	4.36078	3.10442	4.8254	4.67465		1.2954	1.42951	1.52779	0.960867	0.799906	1.21425	0.949991	1.20387	0.670522	1.37216	1.06683	1.23744	1.19746	1.05245	0.830122	1.7307	0.683916	0.917233	1.46349	1.14476	1.01279	1.16187	1.10248	0.844176		1.81279	0.951995	1.39781	1.93205	1.27721	1.8777	2.49687	1.39856
54.75	5.94552	2.70151	4.1691	7.35221	5.39027	5.58846	4.87207	6.03664	3.21981	1.97072	4.25409	4.20902	3.10816	4.90554	4.67272		1.30975	1.48414	1.57581	0.945748	0.818217	1.22391	0.966281	1.17599	0.676139	1.48974	1.09627	1.20406	1.05583	1.05901	0.838199	1.78815	0.627323	0.960398	1.4205	1.15979	1.01795	1.19464	1.09586	0.877824		1.88323	0.99868	1.34408	1.84512	1.33162	1.79858	2.48755	1.41245
55	5.90322	2.67292	4.0671	7.18693	5.29647	5.55773	4.90409	6.1818	3.23545	1.90744	4.32721	4.06649	3.18396	4.95451	4.68895		1.30184	1.3877	1.55877	0.947116	0.794158	1.23856	0.976672	1.1665	0.607882	1.402	1.09983	1.33246	1.16137	1.09762	0.896922	1.6289	0.634003	0.897582	1.44505	1.13038	0.993765	1.18264	1.12783	0.831558		1.79123	0.987622	1.33016	1.86813	1.2967	1.90006	2.4155	1.41779
55.25	5.86151	2.6888	3.87012	7.18612	5.46187	5.73865	4.72984	6.16348	3.15457	2.03536	4.39726	4.19366	3.17266	5.06276	4.78159		1.31959	1.38705	1.59335	0.989327	0.824987	1.14677	0.983979	1.22204	0.645866	1.36696	1.05926	1.31175	1.26691	1.0868	0.795498	1.69752	0.633391	0.885958	1.45384	1.11269	1.03551	1.14465	1.11657	0.79886		1.92265	0.95099	1.34971	1.90235	1.32434	1.8449	2.53815	1.35652
55.5	5.80878	2.60942	3.89518	7.04897	5.4162	5.41836	4.7874	6.12918	3.11648	2.08004	4.20987	4.05219	3.17198	4.90602	4.84093		1.29514	1.36212	1.53777	1.07354	0.804165	1.19983	0.962718	1.17974	0.59841	1.19981	1.08724	1.25679	1.03586	1.0868	0.807415	1.63489	0.599755	0.876099	1.48589	1.1663	1.04625	1.22071	1.10615	0.859643		1.9103	0.946905	1.40692	1.82909	1.30013	1.86337	2.43894	1.35269
55.75	5.78617	2.60694	3.84576	7.11121	5.17725	5.35471	4.93499	6.17264	3.09548	2.09987	4.15507	4.01095	3.14002	4.87693	4.76416		1.39476	1.44484	1.57702	0.908531	0.830736	1.11778	0.951369	1.19341	0.606359	1.24973	1.08571	1.25217	1.16886	1.09186	0.825356	1.74786	0.595663	0.901179	1.47251	1.17267	1.01006	1.15814	1.10677	0.865816		1.96075	0.941879	1.29403	1.8463	1.38668	1.88685	2.37861	1.30068
56	5.95587	2.57551	3.85948	7.10268	5.44919	5.17261	4.69953	6.10257	3.02458	2.02709	4.15667	4.04852	3.1409	5.13075	4.94458		1.36048	1.32347	1.65382	1.02894	0.901507	1.16555	0.997005	1.16412	0.654386	1.37559	1.17838	1.11071	1.06854	1.10848	0.842767	1.58747	0.610434	0.886058	1.45651	1.16962	1.06187	1.12594	1.10109	0.849535		1.93771	0.953754	1.37621	1.88278	1.32348	1.86709	2.54335	1.41886
56.25	5.93618	2.63718	4.01521	7.1776	5.3547	5.35737	4.76372	6.30528	3.11336	2.09713	3.97619	4.18517	3.20821	5.14393	4.82934		1.37345	1.36832	1.65757	1.07245	0.878172	1.1279	1.01803	1.14069	0.670998	1.42814	1.1961	1.14544	1.03995	1.1584	0.853956	1.61887	0.649762	0.902411	1.47576	1.21763	1.04783	1.14316	1.09312	0.872668		1.88101	0.939365	1.37386	1.90628	1.35369	1.94096	2.57145	1.41539
56.5	5.99224	2.5739	4.03509	6.856	5.43922	5.5118	4.90714	6.30269	3.12071	2.19352	4.18244	4.152	3.31494	5.06815	4.87735		1.29244	1.40846	1.60891	1.0312	0.884134	1.12261	0.995149	1.15115	0.671522	1.30078	1.10472	1.13875	1.13323	1.13849	0.908309	1.78022	0.642941	0.943012	1.47041	1.13305	1.02565	1.1464	1.1474	0.886236		1.97589	1.02834	1.40375	1.78857	1.36397	1.92614	2.51085	1.35625
56.75	5.97472	2.51237	4.18194	6.92625	5.54658	5.61652	4.9297	6.13316	3.19081	2.29412	4.11162	4.27722	3.30865	5.13881	4.9786		1.2612	1.38168	1.68303	1.01546	0.813192	1.04126	1.00581	1.18169	0.650626	1.27375	1.23309	1.14329	1.16909	1.14738	0.922145	1.65172	0.68448	0.905909	1.45365	1.18178	1.06582	1.12148	1.15205	0.884675		1.95721	0.900346	1.32883	1.91366	1.46273	1.96372	2.67639	1.48041
57	6.15376	2.56046	4.09075	6.6561	5.44339	5.26056	4.87944	6.42141	2.99131	2.27808	4.29385	4.26268	3.28897	5.16463	4.79651		1.29984	1.44442	1.63706	1.05938	0.858074	1.12415	1.05007	1.17453	0.605122	1.19732	1.23388	1.05225	0.979119	1.12945	0.877855	1.68458	0.664205	0.927258	1.40823	1.0959	1.01902	1.11192	1.12284	0.87199		1.9819	1.001	1.32689	1.9942	1.43745	1.99457	2.65881	1.465
57.25	6.0302	2.56472	4.4038	6.78254	5.52911	5.39712	4.9507	6.28653	3.13496	2.2038	4.12583	4.31528	3.23727	5.22423	4.94364		1.28704	1.43356	1.68621	0.981049	0.821368	1.13504	1.09014	1.18928	0.662192	1.22886	1.18935	1.04397	1.11734	1.21387	0.863224	1.61774	0.672767	0.897415	1.47418	1.14385	1.04558	1.11603	1.14608	0.883454		1.90586	0.927804	1.33865	1.89724	1.54991	1.97514	2.68052	1.43071
57.5	6.05181	2.52517	4.48681	6.68897	5.55352	5.41828	4.90789	6.33129	3.07522	2.2356	4.22777	4.28563	3.38249	5.15036	5.02119		1.28087	1.47638	1.77772	1.0273	0.891117	1.09202	1.10649	1.16564	0.578562	1.23235	1.16357	1.16376	1.06968	1.18937	0.912744	1.64752	0.642518	0.882361	1.37455	1.14606	1.04396	1.1448	1.13583	0.900821		1.91787	1.0098	1.32177	1.99754	1.51671	2.0081	2.60501	1.52075
57.75	6.0861	2.62594	4.15899	6.759	5.61383	5.51485	4.70385	6.23408	3.11589	2.24629	4.26676	4.30687	3.42128	5.30655	5.13272		1.29566	1.37935	1.78713	1.03065	0.841296	1.11173	1.11137	1.18223	0.641915	1.28512	1.22925	1.03186	1.08511	1.21903	0.874743	1.50332	0.572564	0.826406	1.41883	1.11516	1.04392	1.08299	1.1703	0.779255		1.93285	0.948351	1.34971	1.93205	1.55099	1.91415	2.81649	1.48246
58	6.02395	2.61777	4.43106	6.84907	5.78238	5.13851	4.84846	6.14076	3.19265	2.39216	4.33069	4.42449	3.24287	5.42749	5.23736		1.30871	1.41722	1.79272	1.02025	0.861949	1.13204	1.089	1.11118	0.640392	1.34908	1.21715	1.11812	1.14934	1.20675	0.876068	1.68312	0.660112	0.879363	1.3735	1.09525	1.01693	1.07042	1.10345	0.874635		1.93803	0.948979	1.3144	1.87845	1.53406	1.89001	2.66613	1.55166
58.25	6.14283	2.57454	4.39439	6.94301	5.76351	5.37423	4.7591	6.39687	2.95834	2.38522	4.30276	4.06502	3.28872	5.42558	5.19759		1.30888	1.4041	1.80241	1.04762	0.863269	1.12376	1.15494	1.17708	0.609405	1.37056	1.18499	1.11382	1.20132	1.19867	0.926316	1.73798	0.573646	0.847289	1.42021	1.07664	1.00142	1.05552	1.12304	0.802388		1.90298	0.926799	1.3667	1.94503	1.57691	2.01118	2.74431	1.45413
58.5	6.24887	2.54637	4.22406	6.59969	5.8336	5.26527	4.80758	6.14249	2.95333	2.48572	4.20242	4.01527	3.2576	5.54723	5.43354		1.31315	1.42837	1.78911	0.994937	0.797011	1.09317	1.21402	1.21369	0.642534	1.18898	1.18793	1.16017	1.07898	1.26647	0.891493	1.71921	0.573129	0.90361	1.44648	1.06825	1.00619	1.04653	1.11179	0.891798		1.90866	0.925856	1.41777	2.04956	1.60069	1.93326	2.67892	1.3738
58.75	6.08368	2.58294	4.55232	6.83873	5.85731	5.41797	4.90074	6.37475	3.08833	2.56965	4.00592	4.08584	3.27964	5.51346	5.32989		1.27965	1.38222	1.83048	1.03161	0.881834	1.07338	1.16626	1.23723	0.639059	1.20926	1.2242	1.20287	1.17771	1.23732	0.953856	1.7129	0.582067	0.923128	1.39624	1.06968	1.04688	1.0487	1.12232	0.822604		1.92981	0.881935	1.3668	1.85967	1.74721	1.95869	2.64935	1.52022
59	6.22418	2.57518	4.60139	6.75885	5.95256	5.16469	4.90357	6.29059	2.95417	2.52807	4.1525	4.15372	3.36212	5.58439	5.41292		1.31071	1.45778	1.86372	0.969761	0.91079	1.06641	1.0781	1.20555	0.634585	1.28621	1.3048	1.18534	1.12211	1.31664	1.00794	1.6446	0.622383	0.89645	1.41811	1.09876	1.02802	1.05624	1.09428	0.860796		1.96552	0.905624	1.4148	1.90501	1.70694	1.9885	2.71927	1.56893
59.25	6.29751	2.59836	4.44601	6.93616	5.98026	5.11366	4.70742	6.32481	3.08178	2.58847	4.16023	4.38871	3.44047	5.56096	5.54585		1.21866	1.38979	1.78112	1.00739	0.91177	1.05398	1.19303	1.28832	0.714408	1.30213	1.27163	1.137	1.30254	1.39314	0.956173	1.68895	0.649809	0.887557	1.4173	1.11509	1.03405	1.11611	1.08659	0.846618		2.01851	0.909142	1.43077	1.79359	1.76028	1.98834	2.54068	1.58381
59.5	6.32938	2.66852	4.55742	6.94279	5.90992	5.03418	4.61747	6.31971	3.21584	2.46667	4.14484	4.11313	3.45417	5.68773	5.51135		1.31854	1.37792	1.7239	0.965862	0.922799	1.06648	1.18111	1.2983	0.649293	1.21215	1.16848	1.21473	1.28779	1.43704	0.980271	1.66661	0.5704	0.925426	1.41477	1.09694	1.01851	1.09946	1.14644	0.83902		1.96494	0.900534	1.4455	1.78877	1.66217	1.94193	2.47716	1.6612
59.75	6.40814	2.59671	4.59682	6.70208	6.05557	4.99632	4.57912	6.45796	3.2293	2.51204	4.12938	4.09213	3.45334	5.63222	5.46151		1.28739	1.33445	1.73557	0.987275	0.92348	1.07699	1.13529	1.40449	0.660812	1.12188	1.11536	1.25544	1.35225	1.41845	0.98901	1.65593	0.575199	0.923361	1.42031	1.1015	0.969418	1.08593	1.12938	0.866088		1.94075	0.898209	1.49432	1.76497	1.7093	2.04495	2.48648	1.59387
60
[truncated: 29 more columns]

## Sheet: F2D
Nuclear granularity StdDev
StdDev
n1		V7	22Y	14Y	8Y		n2	V7	22Y	14Y	8Y		n3	V7	22Y	14Y	8Y
	1	178.9	73.82	122.77	110.34			110.53	18.89	217.86	229.48			193.54	177.6	146.98	87.14
	2	72.08	78.49	55.95	53.34			11.44	37.37	206.74	349.28			382.61	216.16	246.34	200.71
	3	118.92	42.86	77.39	114.87			230.55	127.65	145.36	219.73			138.1	191.85	210.14	231.21
	4	125.23	48.73	198.74	185.09			177.01	65.26	41.3	270			225.59	77.37	127.56	196.76
	5	221.12	40.57	22.1	62.95			63.97	58.77	68.25	139.2			209.43	148.17	112.25	163
	6	375.22	72.36	82.35	179.51			383.32	29.71	49.75	18.72			87.46	129.4	113.58	144.51
	7	172.6	125.19	19.51	157.85			321.49	139.02	31.69	78.42			189.39	116.89	271.15	292.07
	8	148.51	129.14	21.85	112.17			152.59	122.42	49	67.4			203.46	122.93	209.98	308.95
	9	221.34	21.9	204.33	191.88			289.35	146.47	50.09	69.2			293.35	135.19	224.39	88.87
	10	458.9	89.75	234.88	117.97			209.14	141.8	94.14	184.05			97.15	113.92	157.73	141.64
	11	376.65	76.78	238.67	78.82			320.3	93.28	53.78	103.13			144.01	106.25	165.38	340.11
	12	622.97	198.57	140.69	90.79			209.21	113.55	113.53	216.46			97.8	108.19	232.56	255.34
	13	524.94	297.6	144.35	62.63			312.44	104.22	119.76	175.72			139.95	151.9	164.05	254.21
	14	367.98	44.59	100.91	259.73			169.91	129.7	37.68	60.46			180.62	74.25	252.09	157.84
	15	349.06	13.49	58.72	200.03			225.08	149.16	391.05	38.25			144.91	100.42	161.41	177.6
	16	200.23	11.78	111.78	322.71			338.54	119.54	57.57	32.46			514.81	100.95	164.54	183.69
	17	130.7	13.64	264.13	116.07			250.81	42.28	45.11	111.85			244.21	124.9	189.35	233.56
	18	82.05	10.3	243.15	29.6			224.13	46	41.68	51.03			116.28	101.86	276.71	335.59
	19	430.04	10.32	164.66	67.85			166.12	36.68	19.32				271.8	79.45	168.17	72.69
	20	163.75	35.21	327.24	121.14			310.49	92.36	57.23				181.4	90.93	198.11	236.14
	21	279.48	47.51	94.13	198.68			160.28	59.68	258.29				147.9	113.98	136.42	136.12
	22	18.45	39.89	234.95	245.09			172.06	73.93	47.47				242.62	120.98	223.7	170.62
	23	39.05	94.82	40.81	130.1			227.56	93.47	70.51				231.45	126.42	235.49	235.81
	24	258.88	85.88	44.88	187.19			281.71	86.61	346.1				217.6	68.08	241.33	231.08
	25	247.84	48.57	187.93	206.25			343.6	188.64	214.28				239.71	49.91	147.96	224.36
	26	472.97	46.73	84.58	59.19			242.17	137.03	175.62				107.23	103.11	97.86	164.32
	27	113.06	153.69	358.34	105.87			263.34	91.67	181.42				489.85	165.32	150.08	160.58
	28	114.56	141.03	180.89	246.65			140.54	166.36	172.72				412.12	100.09	144	197.48
	29	108.71	47.14	136.95	135.03			157.46	102.51	81.62				223.97	93.8	113.35	87.14
	30	116.78	55.94	170.18	67.22			261.35	87.16	152.78				464.57	94.54	302.85	215.03
	31	161.35	66.33	104.61	84.23			144.3	34.63	103.03				294.34	93.21	211.56	352.48
	32	145.16	101.38	64.14	175.64			146.97	88.77	114.29				323.73	105.41	245.16	152.58
	33	378.68	123.4	25.98	149.32			187.4	157.37	129.52				305.46	103.07	165.89	122.49
	34	374.68	173.11	36.87	89.72			238.56	111.28	91				178.94	100.15	88.6	228.63
	35	234.04	35.16	46.42	230.84			243.03	104.26	57.26				415.68	79.65	136.55	151.34
	36		139.98	58.27	145.28			279.32	110.48	135.24				341.92	131.66	125.46	189.06
	37		20.18	130.23	185.45			222.05	173.04	108.78				253.9	90.55	269.07	157.31
	38		58.58	112.35	167.04			216.27	131.47	194.84				438.84	76.85	236.87	121.17
	39		33.83	101.94	121.01			155.28	148.14	148.47				125.37	95.83	243.16	250.6
	40		90.23	120.25	81.6			219.73	78.2	170.72				227.89	38.25	187.52	157.36
	41		201.14	53.75	342.26			112.2	181.68	177.76				125.71	112.42	193.93	112.63
	42		68.38	28.33	153.3			137.9	87.6	194.98				154.16	108.27	244	282.86
	43		48.71	16.83	203.97			236.1	59.4	152.66				263.22	107.96	197.37	212.85
	44		69.04	25.76	397.26			157.7	37	143.98				250.08	88.55	161.24	227.67
	45		145.05	13.19	89.42			428.48	38.63	142.01				303.38	77.26	105.41	147.34
	46		221.47	326.8	116.81			335.7	44.93	162.87				342.87	140.1	171.06	224.69
	47		113.47	40.42	236.68			186.44	102.79	103.79				334.53	116.8	71.53	281
	48		138.42	40.39	77.85			270.26	186.8					222	113.31	256.54	197.47
	49		207.01		77.16			234.82	52.65					712.49	108.67	165.82	427
	50		94.65		59			170.28	146.92					397.41	126.98	202.06	148.53
	51		105.75		121.39			291.1	196.31					396.76	133.12	135.9	163.13
	52		50.83		50.49				206.62					152.94	97.73	102.68	243.49
	53		64.24		122.8				82.83					511.11	80.3	155.55	202.46
	54		217.67		82.79				127.53					369.68	89.54	206.86	204.97
	55		37.5		296.72				56.32					131.84	86.65	124.71	188.07
	56		27.02		219.56				121.29					299.17	101.62	194	336.85
	57		27.69		84.9				147.35					375.58	92.54	96.84	87.14
	58		45.61		117.71				87.32					117.3	83.7	142.13	304.17
	59		35.45		87.55				36.54					126.07	98.93	121.63	311.22
	60		57.71		70.61				67.3					278.81	149.1	119.85	240.87
	61		212.39		146.91				69.86					321.4	143.6	211.2	291.09
	62		227.95		77.86				62.48					231.33	122.39	96.57	180.88
	63		171.16		74.78				110.99					342.35	110.48	107.58	173.95
	64		141.45		144.8				100.37					611.08
	65		341.23		192.41				189.38					189.86
	66		308.52		56.07				88.29					298.26
	67		112.49		48.27									298.92
	68		166.53		207.81									456.35
	69		67.96		174.01									164.03
	70		129.89		289.34
	71				181.95

## Sheet: F2G
Transcriptional activity
FL	Vehicle			DHT
	n1	n2	n3	n1	n2	n3
AR WT	0.0425203	0.137384	0.0554087	1	1	1
22Y	0.0206504	0.0438573	0.0441106	0.0220325	0.0297226	0.0509615
14Y	0.0186992	0.0401585	0.0335337	0.0598374	0.140026	0.0902644
8Y	0.0134959	0.0265522	0.027524	0.51626	0.974901	0.689904
eV	0.00934959	0.0446499	0.122596	0.0097561	0.0326288	0.101683
V7	Vehicle				DHT
	n1	n2	n3	n4	n1	n2	n3	n4
AR WT	1	1	1	1	1.21	1.47	0.704	0.712
22Y	0.00586	0.00642	0.00601	0.0065	0.0105	0.0137	0.00512	0.00519
14Y	0.0877	0.103	0.0335	0.0346	0.0814	0.0972	0.04	0.0411
8Y	0.446	0.518	0.35	0.363	0.466	0.541	0.446	0.423
eV	0.00543	0.00632	0.00347	0.00502	0.00818	0.0147	0.00364	0.00453
