# Supplementary material for: Rational optimization of a transcription factor activation domain inhibitor
Source: Nat Struct Mol Biol. 2023 Dec 4;30(12):1958–69. doi: 10.1038/s41594-023-01159-5 (PMC10716049; doi:10.1038/s41594-023-01159-5)
Supplement: Supplementary file 15 — Statistical source data. [file 41594_2023_1159_MOESM15_ESM.xlsx]

## Sheet: F3A
Helicity %
AR AD								AR Tau-5*
num	aa	Helix	Beta	Coil	PPII	TFE		num	aa	Helix	Beta	Coil	PPII	TFE
1	M	NA	NA	NA	NA	0		330	A	NA	NA	NA	NA	0
2	E	0	4.6	87.2	8.1	0		331	A	1.8	6.6	74.1	17.5	0
3	V	0.1	3.1	88.9	7.9	0		332	G	1.9	7.8	71.4	18.9	0
4	Q	0.6	3.1	87.3	9.1	0		333	S	1.6	7.3	74.5	16.7	0
5	L	1.5	3.4	84.8	10.3	0		334	S	1.7	9.1	73	16.2	0
6	G	2.3	5.6	77.2	14.9	0		335	G	2.2	11.8	69.4	16.5	0
7	L	2.2	7.8	74.6	15.5	0		336	T	1.4	10.9	73.7	14.1	0
8	G	1.3	10.4	70.8	17.5	0		337	L	0.5	9.4	78.1	12	0
9	R	0.5	9.1	76.4	14	0		338	E	0	11.5	77.6	11	0
10	V	0.2	7.2	80.9	11.7	0		339	L	0	13.1	75.8	11	0
11	Y	NA	NA	NA	NA	0		340	P	NA	NA	NA	NA	0
12	P	NA	NA	NA	NA	0		341	S	0.1	8.9	84.9	6	0
13	R	NA	NA	NA	NA	0		342	T	0.3	6.7	87.2	5.8	0
14	P	NA	NA	NA	NA	0		343	L	0.5	3.4	90	6.2	0
15	P	NA	NA	NA	NA	0		344	S	0.4	1.3	91.4	7	0
16	S	NA	NA	NA	NA	0		345	L	0.3	1.5	91	7.1	0
17	K	NA	NA	NA	NA	0		346	Y	0.2	3.4	89.6	6.8	0
18	T	NA	NA	NA	NA	0		347	K	0.4	5.8	84.5	9.3	0
19	Y	NA	NA	NA	NA	0		348	S	0.9	7	78.3	13.8	0
20	R	NA	NA	NA	NA	0		349	G	1.5	7.9	74.1	16.6	0
21	G	1.4	4.4	77.4	16.8	0		350	A	1.3	4.6	83.4	10.7	0
22	A	0.9	4.7	83.4	11	0		351	L	1.1	1.9	91	6	0
23	F	0.6	5.5	85.6	8.4	0		352	D	1.2	0.4	94.2	4.2	0
24	Q	NA	NA	NA	NA	0		353	E	1.9	0.2	94.3	3.6	0
25	N	NA	NA	NA	NA	0		354	A	2.2	0.1	95.7	2	0
26	L	NA	NA	NA	NA	0		355	A	2.2	0.3	96.3	1.2	0
27	F	NA	NA	NA	NA	0		356	A	2.4	0.8	95.2	1.6	0
28	Q	NA	NA	NA	NA	0		357	Y	2.3	1.3	93.6	2.9	0
29	S	NA	NA	NA	NA	0		358	Q	1.2	1.2	92.8	4.8	0
30	V	0	4.1	90.1	5.7	0		359	S	0.4	2	91.6	5.9	0
31	R	0	5.8	87.4	6.7	0		360	R	0.6	3.9	88.9	6.6	0
32	E	0	8.6	85	6.4	0		361	D	1.6	6.3	86	6.1	0
33	V	0	11.4	82.3	6.3	0		362	Y	2.7	5.6	86.9	4.7	0
34	I	0	15.7	77.3	7	0		363	Y	2.1	4.4	89.2	4.3	0
35	Q	0	21.2	70.7	8	0		364	N	1	4.2	90.4	4.4	0
36	N	0	27.3	62.2	10.5	0		365	F	0.2	3.6	91.6	4.6	0
37	P	NA	NA	NA	NA	0		366	P	NA	NA	NA	NA	0
38	G	0.2	31.9	47.1	20.8	0		367	L	0.2	1.3	93.2	5.3	0
39	P	NA	NA	NA	NA	0		368	A	0.2	1.3	91.7	6.9	0
40	R	0.3	14.4	74.6	10.8	0		369	L	0.2	4.4	86	9.4	0
41	H	NA	NA	NA	NA	0		370	A	0.3	10.8	74.7	14.2	0
42	P	NA	NA	NA	NA	0		371	G	0.4	21	59.1	19.4	0
43	E	0.1	1.6	91.1	7.2	0		372	P	NA	NA	NA	NA	0
44	A	0.1	1.9	92.2	5.7	0		373	P	NA	NA	NA	NA	0
45	A	0.1	3.2	91.4	5.3	0		374	P	NA	NA	NA	NA	0
46	S	0.1	6.6	86.6	6.6	0		375	P	NA	NA	NA	NA	0
47	A	0.1	10.4	80.9	8.7	0		376	P	NA	NA	NA	NA	0
48	A	0	14.9	75.1	9.9	0		377	P	NA	NA	NA	NA	0
49	P	NA	NA	NA	NA	0		378	P	NA	NA	NA	NA	0
50	P	NA	NA	NA	NA	0		379	P	NA	NA	NA	NA	0
51	G	6.1	9.9	66.1	17.9	0		380	H	0	33.7	56.3	10	0
52	A	11.4	4.6	75	9	0		381	P	NA	NA	NA	NA	0
53	S	23.5	1.5	71.2	3.9	0		382	H	0.1	13.3	78.3	8.4	0
54	L	49	0	50.2	0.8	0		383	A	0.1	5.7	86.8	7.4	0
55	L	72.6	0	27	0.3	0		384	R	0.1	4.3	89	6.7	0
56	L	87.4	0	12.6	0	0		385	I	0.1	5	87	8	0
57	L	92.2	0	7.8	0	0		386	K	0	7.9	81	11.1	0
58	Q	90.8	0	9.2	0	0		387	L	0	9.2	79.2	11.6	0
59	Q	84.6	0	15.4	0	0		388	E	0	12.9	76.6	10.4	0
60	Q	80.8	0	19.2	0	0		389	N	0.1	16.2	75.6	8.1	0
61	Q	73.2	0	26.7	0	0		390	P	NA	NA	NA	NA	0
62	Q	NA	NA	NA	NA	0		391	L	1.7	3.3	91	4.1	0
63	Q	NA	NA	NA	NA	0		392	D	3.5	1.1	90.5	5	0
64	Q	NA	NA	NA	NA	0		393	Y	7	1.4	85.8	5.7	0
65	Q	NA	NA	NA	NA	0		394	G	12.6	1.6	79.3	6.5	0
66	Q	NA	NA	NA	NA	0		395	S	22.2	1.2	72.7	3.8	0
67	Q	NA	NA	NA	NA	0		396	A	31.2	0.5	66.8	1.5	0
68	Q	NA	NA	NA	NA	0		397	W	34.1	0.1	65.5	0.3	0
69	Q	NA	NA	NA	NA	0		398	A	32.9	0	66.9	0.1	0
70	Q	NA	NA	NA	NA	0		399	A	30.6	0	69.3	0.1	0
71	Q	NA	NA	NA	NA	0		400	A	26.2	0	73.7	0.1	0
72	Q	NA	NA	NA	NA	0		401	A	17.8	0	81.8	0.4	0
73	Q	NA	NA	NA	NA	0		402	A	9.5	0.1	89.6	0.8	0
74	Q	NA	NA	NA	NA	0		403	Q	3.5	0.3	94.3	1.8	0
75	Q	0.1	1.8	95	3.1	0		404	C	1.5	1.1	94.2	3.2	0
76	Q	0.1	2.4	94.3	3.2	0		405	R	1.7	2.7	88.7	6.9	0
77	Q	NA	NA	NA	NA	0		406	Y	2.3	4.5	81.9	11.3	0
78	Q	NA	NA	NA	NA	0		407	G	2.9	4.7	77.1	15.3	0
79	E	0.1	9.7	80.6	9.6	0		408	D	4.4	2.7	81.7	11.3	0
80	T	0.1	12.4	77.3	10.2	0		409	L	6.4	0.9	87.2	5.4	0
81	S	0.1	15.5	74.5	9.9	0		410	A	5.5	0.1	92	2.3	0
82	P	NA	NA	NA	NA	0		411	S	4	0.2	93.7	2.2	0
83	R	0.5	11.1	82.5	5.9	0		412	L	3.9	1.4	90.4	4.3	0
84	Q	NA	NA	NA	NA	0		413	H	4.5	3.6	83.7	8.3	0
85	Q	0.1	3.9	90.3	5.6	0		414	G	4.4	7.1	74.2	14.3	0
86	Q	0	3.2	90.4	6.3	0		415	A	4.2	8.9	71.9	15	0
87	Q	0	3.3	89.5	7.2	0		416	G	4.3	10.7	69.9	15.2	0
88	Q	0.2	3.9	85.6	10.2	0		417	A	2.6	9.1	75.9	12.5	0
89	Q	0.7	5.4	79.1	14.8	0		418	A	1.1	11	73.6	14.3	0
90	G	1.1	6.1	74.1	18.6	0		419	G	0.7	18.2	61.3	19.9	0
91	E	1.2	6	76	16.7	0		420	P	NA	NA	NA	NA	0
92	D	1.5	8.5	73.5	16.5	0		421	G	2.5	16.7	57.4	23.4	0
93	G	2	14.1	65.7	18.2	0		422	S	2.2	15.3	63.8	18.7	0
94	S	1.4	16.9	66.6	15.1	0		423	G	1.8	20.3	60.2	17.7	0
95	P	NA	NA	NA	NA	0		424	S	1	22.4	63.5	13.1	0
96	Q	0.2	3.5	88.1	8.2	0		425	P	NA	NA	NA	NA	0
97	A	0.5	1.2	90.7	7.5	0		426	S	0	6.7	88.8	4.4	0
98	H	0.9	2.6	90.1	6.3	0		427	A	0.2	2.4	93.9	3.5	0
99	R	NA	NA	NA	NA	0		428	A	0.3	1.3	94.5	3.9	0
100	R	0.3	10.9	80.4	8.4	0		429	A	0.4	1.2	92.5	5.9	0
101	G	NA	NA	NA	NA	0		430	S	0.2	1.8	90.5	7.5	0
102	P	NA	NA	NA	NA	0		431	S	0.3	3.3	88.4	8	0
103	T	0.8	5.8	81.2	12.3	0		432	S	0.6	4.9	87.7	6.8	0
104	G	0.9	8	76.2	14.9	0		433	W	0.9	6.4	86.8	5.9	0
105	Y	0.6	7	80.8	11.6	0		434	H	0.7	4.1	89.7	5.5	0
106	L	0.4	4.4	86.2	9	0		435	T	0.5	2	92.2	5.3	0
107	V	0.3	2.9	88.6	8.2	0		436	L	0.5	1.4	93.8	4.2	0
108	L	0.2	3	89.4	7.4	0		437	F	0.5	2.5	92.1	4.8	0
109	D	0.1	3.9	88.9	7.1	0		438	T	0.3	3.4	89.2	7.1	0
110	E	0.1	3.4	88.5	7.9	0		439	A	0.2	2.4	88.9	8.6	0
111	E	0.2	6	86.1	7.7	0		440	E	0.3	2	87.2	10.5	0
112	Q	0.1	12.6	81.2	6.1	0		441	E	0.6	2.4	82.6	14.4	0
113	Q	0	22.6	72.4	5	0		442	G	0.9	3.3	78.1	17.8	0
114	P	NA	NA	NA	NA	0		443	Q	0.7	2.9	83.5	12.9	0
115	S	0	26.4	66.1	7.5	0		444	L	0.5	4.5	85.9	9.1	0
116	Q	0	25.8	65.7	8.5	0		445	Y	0.3	8.7	80	10.9	0
117	P	NA	NA	NA	NA	0		446	G	0.2	14.8	67.1	17.9	0
118	Q	0	11.4	83	5.6	0		447	P	NA	NA	NA	NA	0
119	S	0.1	7.4	86.9	5.7	0		448	C	NA	NA	NA	NA	0
120	A	0.2	4.5	88.4	7	0		330	A	NA	NA	NA	NA	5
121	L	0.2	1.9	90.2	7.7	0		331	A	1.8	5.7	76.5	16.1	5
122	E	0.1	0.7	91.5	7.6	0		332	G	2	7.2	72.7	18.1	5
123	C	0.1	0.4	93	6.5	0		333	S	1.6	6.9	75.1	16.4	5
124	H	NA	NA	NA	NA	0		334	S	1.7	8.8	73.5	16	5
125	P	NA	NA	NA	NA	0		335	G	2.2	11.5	69.9	16.4	5
126	E	0.8	3.6	84	11.7	0		336	T	1.4	10.5	74.2	13.9	5
127	R	1.3	7	78.1	13.6	0		337	L	0.5	8.9	78.9	11.6	5
128	G	1.5	10.8	71.1	16.5	0		338	E	0	10.5	78.8	10.6	5
129	C	0.9	9.6	74.9	14.6	0		339	L	0	11.4	78	10.5	5
130	V	0.3	11.4	75.9	12.4	0		340	P	NA	NA	NA	NA	5
131	P	NA	NA	NA	NA	0		341	S	0	8.3	86.4	5.3	5
132	E	0.2	27.3	60	12.5	0		342	T	0	7.4	87.6	4.9	5
133	P	NA	NA	NA	NA	0		343	L	NA	NA	NA	NA	5
134	G	0.8	14.3	67.4	17.6	0		344	S	0.4	1.3	92.2	6.2	5
135	A	0.5	5.7	84.9	8.8	0		345	L	0.6	0.7	92.6	6.1	5
136	A	0.2	2	94.4	3.4	0		346	Y	0.7	1.3	92.3	5.8	5
137	V	0.1	0.5	98	1.4	0		347	K	NA	NA	NA	NA	5
138	A	0.2	0.8	95.8	3.2	0		348	S	1.3	5.9	77.2	15.6	5
139	A	0.4	1.8	92.6	5.2	0		349	G	1.8	7.2	73.8	17.2	5
140	S	0.5	5.1	84.8	9.7	0		350	A	1.5	4.3	83.9	10.4	5
141	K	0.6	11.2	73.8	14.4	0		351	L	1.4	1.7	91.2	5.6	5
142	G	0.6	17.3	63.2	18.9	0		352	D	2.1	0.3	94	3.7	5
143	L	0.4	17.5	66.4	15.8	0		353	E	3.6	0.1	93.2	3	5
144	P	NA	NA	NA	NA	0		354	A	4.7	0	93.7	1.6	5
145	Q	0	11.7	81.6	6.7	0		355	A	4.7	0.2	94.3	0.8	5
146	Q	0	13.8	78.2	7.9	0		356	A	4.8	0.5	93.6	1.1	5
147	L	0	17.4	73.1	9.5	0		357	Y	4.1	0.8	92.8	2.3	5
148	P	NA	NA	NA	NA	0		358	Q	2.3	0.7	93	4	5
149	A	0	31	63.1	5.9	0		359	S	0.8	1.8	92.2	5.3	5
150	P	NA	NA	NA	NA	0		360	R	NA	NA	NA	NA	5
151	P	NA	NA	NA	NA	0		361	D	2.6	7	85.1	5.3	5
152	D	0	7.9	82.8	9.3	0		362	Y	3.7	5.3	86.9	4.1	5
153	E	0.1	8.3	83.1	8.6	0		363	Y	2.6	3.8	89.7	3.9	5
154	D	0.1	6.5	85.8	7.5	0		364	N	1.2	3.6	91.2	4	5
155	D	0.2	4.1	88.5	7.2	0		365	F	0.3	3.1	92.5	4.2	5
156	S	0.2	2.8	90.7	6.3	0		366	P	NA	NA	NA	NA	5
157	A	0.2	2.3	90.6	7	0		367	L	0.3	1	93.9	4.8	5
158	A	NA	NA	NA	NA	0		368	A	0.2	1.1	92.2	6.5	5
159	P	NA	NA	NA	NA	0		369	L	0.2	4.2	86.5	9.1	5
160	S	0.1	8.5	85	6.4	0		370	A	0.3	10.6	75.1	14.1	5
161	T	0.2	7.4	85.9	6.6	0		371	G	0.5	20.6	59.5	19.5	5
162	L	0.3	3.9	89	6.8	0		372	P	NA	NA	NA	NA	5
163	S	0.4	1.7	90.9	7.1	0		373	P	NA	NA	NA	NA	5
164	L	0.5	3.1	88.3	8	0		374	P	NA	NA	NA	NA	5
165	L	0.6	8.4	81.4	9.6	0		375	P	NA	NA	NA	NA	5
166	G	0.4	16.9	69.3	13.5	0		376	P	NA	NA	NA	NA	5
167	P	NA	NA	NA	NA	0		377	P	NA	NA	NA	NA	5
168	T	0	14.2	74.8	10.9	0		378	P	NA	NA	NA	NA	5
169	F	0.4	10.3	77.7	11.6	0		379	P	NA	NA	NA	NA	5
170	P	NA	NA	NA	NA	0		380	H	1.1	32.4	56.7	9.8	5
171	G	1.9	6.1	76	16.1	0		381	P	NA	NA	NA	NA	5
172	L	1.2	4.1	83.1	11.7	0		382	H	3	10.3	79.4	7.3	5
173	S	0.5	4.2	85.5	9.9	0		383	A	1.6	4	88	6.5	5
174	S	0.1	5	87.1	7.8	0		384	R	0.6	3.1	90.5	5.9	5
175	C	0.1	5.7	87.4	6.8	0		385	I	0.1	3.7	89.4	6.8	5
176	S	0.1	4.3	89.5	6	0		386	K	0	6.9	83.1	9.9	5
177	A	0.3	3.3	90.2	6.2	0		387	L	NA	NA	NA	NA	5
178	D	0.7	3.1	89.9	6.3	0		388	E	0	14.7	75.6	9.7	5
179	L	1	2.3	91.1	5.5	0		389	N	0.2	16.5	75.6	7.6	5
180	K	0.8	2.1	91.5	5.6	0		390	P	NA	NA	NA	NA	5
181	D	0.8	2.2	91.1	6	0		391	L	2.6	3	90.8	3.7	5
182	I	0.9	1.6	91.5	6.1	0		392	D	5.2	1.5	88.8	4.5	5
183	L	0.7	1	92.6	5.7	0		393	Y	8.9	3.1	82.4	5.6	5
184	S	2.5	0.7	91.8	5	0		394	G	9.6	5.2	77.4	7.8	5
185	E	6.5	0.4	89.6	3.5	0		395	S	NA	NA	NA	NA	5
186	A	10.7	0.2	87.3	1.8	0		396	A	13.2	1.4	82.4	3	5
187	S	12.3	0.2	86.6	0.9	0		397	W	29.9	0.3	68.6	1.2	5
188	T	16.9	0.3	82.2	0.7	0		398	A	51.3	0.1	48	0.5	5
189	M	25.7	0.2	73.7	0.4	0		399	A	61	0	38.9	0.1	5
190	Q	31.9	0.1	67.8	0.2	0		400	A	57.5	0	42.5	0	5
191	L	37.8	0	62.1	0.1	0		401	A	42.2	0	57.7	0.1	5
192	L	34.7	0	65.2	0.1	0		402	A	25.1	0	74.5	0.3	5
193	Q	20.3	0	79.4	0.2	0		403	Q	10.8	0.1	88.6	0.6	5
194	Q	8.2	0.1	91.1	0.6	0		404	C	3.8	0.1	95.2	0.8	5
195	Q	2.3	0.3	96.5	1	0		405	R	NA	NA	NA	NA	5
196	Q	0.9	0.6	96.5	2	0		406	Y	NA	NA	NA	NA	5
197	Q	0.3	0.8	95.5	3.4	0		407	G	4.6	4.2	72.5	18.6	5
198	E	0.2	0.9	94.4	4.5	0		408	D	8.2	2.1	78.7	11	5
199	A	0.1	1.2	94.5	4.2	0		409	L	12.6	0.7	81.8	4.9	5
200	V	0.1	1.9	93.4	4.6	0		410	A	11.8	0.1	86.4	1.7	5
201	S	0.8	3.4	87.7	8.1	0		411	S	7.9	0.1	90.5	1.5	5
202	E	2.1	4.6	81.1	12.2	0		412	L	6.4	1.3	88.8	3.6	5
203	G	3.5	6.1	74.5	16	0		413	H	6.2	3.2	83	7.6	5
204	S	2.9	5.8	76.6	14.7	0		414	G	5.5	6.6	74.2	13.7	5
205	S	NA	NA	NA	NA	0		415	A	5	8.3	71.6	15.1	5
206	S	NA	NA	NA	NA	0		416	G	5.4	10	68.4	16.3	5
207	G	3.2	12.8	66.9	17.2	0		417	A	4	8.6	72.8	14.6	5
208	R	1.5	7.2	78.9	12.4	0		418	A	2	10.7	71.6	15.7	5
209	A	0.5	3.4	85.7	10.4	0		419	G	1	17.8	60.8	20.4	5
210	R	0.1	1.7	88.5	9.8	0		420	P	NA	NA	NA	NA	5
211	E	0.1	1.9	88.4	9.6	0		421	G	2.5	16.6	57.6	23.3	5
212	A	0.2	4	85.5	10.3	0		422	S	2.2	15.1	64.1	18.6	5
213	S	0.4	9.9	76.2	13.4	0		423	G	1.8	19.7	60.9	17.6	5
214	G	0.6	18.2	63.8	17.4	0		424	S	1	21.2	64.8	13.1	5
215	A	0.4	20.2	63.6	15.8	0		425	P	NA	NA	NA	NA	5
216	P	NA	NA	NA	NA	0		426	S	2	5.8	88.3	3.9	5
217	T	0	12.6	77.9	9.4	0		427	A	5.1	2	90.6	2.3	5
218	S	0	13.6	77.5	8.9	0		428	A	8.9	1	88.3	1.8	5
219	S	NA	NA	NA	NA	0		429	A	NA	NA	NA	NA	5
220	K	0.2	11.9	81.1	6.8	0		430	S	1.9	1.5	89.8	6.8	5
221	D	0.2	8.7	84.3	6.8	0		431	S	0.3	2.8	89.4	7.4	5
222	N	0.3	6.2	87.3	6.2	0		432	S	0.8	4.2	88.8	6.1	5
223	Y	0.8	3.7	89.7	5.8	0		433	W	1.4	5.7	87.9	5	5
224	L	2.2	3.6	86.7	7.4	0		434	H	1.2	4	90.5	4.3	5
225	G	4.1	5.9	78.1	11.9	0		435	T	0.9	2.5	92.4	4.2	5
226	G	4.3	8.6	72.7	14.4	0		436	L	NA	NA	NA	NA	5
227	T	2.3	9.2	76.3	12.2	0		437	F	NA	NA	NA	NA	5
228	S	0.7	8.4	81	9.9	0		438	T	0.1	3.2	88.1	8.6	5
229	T	0.1	7.3	84.8	7.8	0		439	A	0.2	1.8	89.9	8.1	5
230	I	0.2	5.6	87.7	6.5	0		440	E	0.5	1.5	88.6	9.4	5
231	S	0.2	5.6	89.5	4.7	0		441	E	0.9	1.9	83.9	13.4	5
232	D	0.6	5.6	89.8	4.1	0		442	G	1.1	2.8	79.3	16.9	5
233	N	1.3	3.5	92.1	3	0		443	Q	0.9	2.3	84.8	12	5
234	A	2	1.4	94.2	2.4	0		444	L	0.9	3.6	87.6	8	5
235	K	1.9	0.4	95.7	2.1	0		445	Y	0.9	7.2	82.5	9.4	5
236	E	2	0.4	95.1	2.5	0		446	G	0.7	13.4	69.3	16.6	5
237	L	2.3	1.9	91.9	3.9	0		447	P	NA	NA	NA	NA	5
238	C	1.4	4.6	87.4	6.6	0		448	C	NA	NA	NA	NA	5
239	K	0.5	7.1	83.1	9.3	0
240	A	0	4.8	86.5	8.6	0
241	V	0	2.4	90.5	7.1	0
242	S	0	1.3	92.3	6.3	0
243	V	0.3	1	92	6.7	0
244	S	1.1	1.7	88.3	8.9	0
245	M	2.2	3.4	82.7	11.7	0
246	G	2.8	5.3	75.2	16.7	0
247	L	2.8	4.3	76.4	16.4	0
248	G	2.2	3	77.6	17.2	0
249	V	1.1	1.5	85.8	11.6	0
250	E	0.4	1.1	89.7	8.8	0
251	A	0.2	1.1	91.7	7	0
252	L	0.2	1.8	90.7	7.2	0
253	E	0.2	3.1	88.8	7.9	0
254	H	0.1	6.5	85.7	7.7	0
255	L	0.1	9.7	83.8	6.5	0
256	S	0.2	14.2	77.3	8.2	0
257	P	NA	NA	NA	NA	0
258	G	1	8.1	72.6	18.3	0
259	E	0.6	3.7	83.6	12.1	0
260	Q	0.4	2.3	89.7	7.7	0
261	L	0.5	2.7	90.1	6.7	0
262	R	0.7	6	82.2	11.1	0
263	G	1	9.7	73.4	15.9	0
264	D	0.7	8.6	77.8	13	0
265	C	0.3	5.5	85.6	8.6	0
266	M	0.1	4.5	88.8	6.6	0
267	Y	0.1	6.1	85.7	8.1	0
268	A	0	5.8	84	10.2	0
269	P	NA	NA	NA	NA	0
270	L	0.4	3.8	87.8	8	0
271	L	0.9	7.3	82.4	9.5	0
272	G	1.3	11.9	73.5	13.3	0
273	V	1.1	11.8	75.6	11.5	0
274	P	NA	NA	NA	NA	0
275	P	NA	NA	NA	NA	0
276	A	0	5.8	86.8	7.4	0
277	V	0	10.6	83.4	6	0
278	R	0	18.4	75.4	6.1	0
279	P	NA	NA	NA	NA	0
280	T	0	26.3	64.7	9	0
281	P	NA	NA	NA	NA	0
282	C	0	18.1	66.1	15.8	0
283	A	0	21.7	64.8	13.4	0
284	P	NA	NA	NA	NA	0
285	L	0.1	6.2	85.6	8.1	0
286	A	0	3.1	87.7	9.2	0
287	E	0	6.4	83.3	10.2	0
288	C	0.2	11.6	75.3	12.8	0
289	K	0.5	15.9	67.3	16.4	0
290	G	0.7	13	67.4	19	0
291	S	0.5	7.1	78.1	14.3	0
292	L	0.3	2.7	87.8	9.1	0
293	L	0.2	1.6	92.3	5.9	0
294	D	0.2	1.9	92	6	0
295	D	0.3	1.4	92.4	5.8	0
296	S	1	2	91.1	6	0
297	A	2.1	4.2	85.1	8.5	0
298	G	2.9	7.4	77.9	11.8	0
299	K	2	6.8	79.8	11.4	0
300	S	0.8	4.6	85.3	9.3	0
301	T	0.2	3.2	89.5	7.1	0
302	E	0.1	3.4	89.6	7	0
303	D	0.1	4.1	88	7.9	0
304	T	0.1	4.6	86	9.3	0
305	A	0.1	4.3	85.2	10.4	0
306	E	0.2	5.7	83.7	10.4	0
307	Y	0.3	7.7	83.5	8.5	0
308	S	0.4	8.7	85.2	5.8	0
309	P	NA	NA	NA	NA	0
310	F	1.9	5.5	86.4	6.3	0
311	K	3.1	6.3	79.6	11.1	0
312	G	4.4	7.9	70.9	16.8	0
313	G	3.4	8.8	68.7	19.1	0
314	Y	1.9	8	76.8	13.3	0
315	T	0.9	6.6	82.7	9.7	0
316	K	1.1	5.1	83.1	10.8	0
317	G	1.4	4.1	79.5	15	0
318	L	1.3	2.9	81.4	14.4	0
319	E	1.1	2.7	80.6	15.6	0
320	G	1	3.3	78.1	17.6	0
321	E	0.8	2.7	82.2	14.3	0
322	S	1.1	3.7	83.8	11.4	0
323	L	2.2	6.8	80.2	10.7	0
324	G	3.7	13	67.2	16.1	0
325	C	NA	NA	NA	NA	0
326	S	NA	NA	NA	NA	0
327	G	4.9	7.3	68.9	18.9	0
328	S	2.3	4.7	82.5	10.5	0
329	A	0.8	2.2	91.5	5.4	0
330	A	0.7	1.7	92	5.6	0
331	A	1.7	3.4	84.1	10.8	0
332	G	2.5	5.7	76.1	15.7	0
333	S	2	6.2	76.1	15.7	0
334	S	2	8.4	73.9	15.7	0
335	G	2.4	11.3	69.9	16.4	0
336	T	1.5	10.6	74	13.9	0
337	L	0.6	9.4	78.3	11.8	0
338	E	0	11.6	77.5	10.9	0
339	L	0	13.2	75.6	11.2	0
340	P	NA	NA	NA	NA	0
341	S	0.2	8.6	85.2	6	0
342	T	0.3	6.3	87.8	5.6	0
343	L	0.5	3.1	90.4	6	0
344	S	0.5	1.2	91.7	6.7	0
345	L	0.4	1.4	91.3	6.9	0
346	Y	0.3	3.2	89.9	6.6	0
347	K	0.5	5.5	84.8	9.2	0
348	S	1	6.8	78.6	13.7	0
349	G	1.7	7.6	74.4	16.4	0
350	A	1.4	4.4	83.6	10.5	0
351	L	1.2	1.9	91.1	5.9	0
352	D	1.3	0.4	94.2	4.2	0
353	E	2	0.2	94.2	3.6	0
354	A	2.3	0.1	95.6	2	0
355	A	2.3	0.3	96.3	1.2	0
356	A	2.4	0.8	95.2	1.6	0
357	Y	2.2	1.3	93.6	2.9	0
358	Q	1.2	1.3	92.7	4.8	0
359	S	0.5	1.3	92.6	5.6	0
360	R	0.8	1.3	92	5.8	0
361	D	NA	NA	NA	NA	0
362	Y	4	3.3	89.8	2.9	0
363	Y	NA	NA	NA	NA	0
364	N	0.7	5	90.1	4.3	0
365	F	0	4.2	90.9	4.9	0
366	P	NA	NA	NA	NA	0
367	L	NA	NA	NA	NA	0
368	A	0.2	1.4	90.6	7.8	0
369	L	0.3	5	85.4	9.3	0
370	A	0.5	11.3	74.7	13.4	0
371	G	0.7	21.3	59.1	18.9	0
372	P	NA	NA	NA	NA	0
373	P	NA	NA	NA	NA	0
374	P	NA	NA	NA	NA	0
375	P	NA	NA	NA	NA	0
376	P	NA	NA	NA	NA	0
377	P	NA	NA	NA	NA	0
378	P	NA	NA	NA	NA	0
379	P	NA	NA	NA	NA	0
380	H	NA	NA	NA	NA	0
381	P	NA	NA	NA	NA	0
382	H	NA	NA	NA	NA	0
383	A	NA	NA	NA	NA	0
384	R	NA	NA	NA	NA	0
385	I	NA	NA	NA	NA	0
386	K	NA	NA	NA	NA	0
387	L	NA	NA	NA	NA	0
388	E	0	7.4	82.8	9.8	0
389	N	NA	NA	NA	NA	0
390	P	NA	NA	NA	NA	0
391	L	NA	NA	NA	NA	0
392	D	0.1	1.9	90.8	7.2	0
393	Y	NA	NA	NA	NA	0
394	G	NA	NA	NA	NA	0
395	S	NA	NA	NA	NA	0
396	A	NA	NA	NA	NA	0
397	W	NA	NA	NA	NA	0
398	A	NA	NA	NA	NA	0
399	A	NA	NA	NA	NA	0
400	A	NA	NA	NA	NA	0
401	A	NA	NA	NA	NA	0
402	A	NA	NA	NA	NA	0
403	Q	NA	NA	NA	NA	0
404	C	NA	NA	NA	NA	0
405	R	NA	NA	NA	NA	0
406	Y	NA	NA	NA	NA	0
407	G	NA	NA	NA	NA	0
408	D	NA	NA	NA	NA	0
409	L	10.1	0.1	88.9	0.9	0
410	A	7.1	0.1	91.3	1.5	0
411	S	4.6	0.2	93.2	2	0
412	L	4.4	1.3	90.2	4.1	0
413	H	5	3.4	83.6	8	0
414	G	4.7	5.6	75.4	14.3	0
415	A	4.1	5.1	75.1	15.8	0
416	G	3.8	4.6	75	16.7	0
417	A	2.3	5.3	79	13.4	0
418	A	1	9.5	74.9	14.6	0
419	G	0.7	18	61.5	19.8	0
420	P	NA	NA	NA	NA	0
421	G	2.5	16.5	57.7	23.3	0
422	S	2.2	15.3	63.9	18.7	0
423	G	1.8	20.2	60.4	17.6	0
424	S	1	22.2	63.7	13.1	0
425	P	NA	NA	NA	NA	0
426	S	0.2	6.7	88.7	4.4	0
427	A	0.4	2.9	93.6	3.1	0
428	A	0.8	2.3	94.7	2.2	0
429	A	NA	NA	NA	NA	0
430	S	NA	NA	NA	NA	0
431	S	NA	NA	NA	NA	0
432	S	NA	NA	NA	NA	0
433	W	NA	NA	NA	NA	0
434	H	NA	NA	NA	NA	0
435	T	NA	NA	NA	NA	0
436	L	NA	NA	NA	NA	0
437	F	NA	NA	NA	NA	0
438	T	NA	NA	NA	NA	0
439	A	NA	NA	NA	NA	0
440	E	NA	NA	NA	NA	0
441	E	NA	NA	NA	NA	0
442	G	NA	NA	NA	NA	0
443	Q	NA	NA	NA	NA	0
444	L	NA	NA	NA	NA	0
445	Y	NA	NA	NA	NA	0
446	G	NA	NA	NA	NA	0
447	P	NA	NA	NA	NA	0
448	C	0	3.1	78.4	18.5	0
449	G	NA	NA	NA	NA	0
450	G	NA	NA	NA	NA	0
451	G	NA	NA	NA	NA	0
452	G	NA	NA	NA	NA	0
453	G	NA	NA	NA	NA	0
454	G	NA	NA	NA	NA	0
455	G	NA	NA	NA	NA	0
456	G	NA	NA	NA	NA	0
457	G	NA	NA	NA	NA	0
458	G	NA	NA	NA	NA	0
459	G	NA	NA	NA	NA	0
460	G	NA	NA	NA	NA	0
461	G	NA	NA	NA	NA	0
462	G	NA	NA	NA	NA	0
463	G	NA	NA	NA	NA	0
464	G	NA	NA	NA	NA	0
465	G	NA	NA	NA	NA	0
466	G	NA	NA	NA	NA	0
467	G	NA	NA	NA	NA	0
468	G	NA	NA	NA	NA	0
469	G	NA	NA	NA	NA	0
470	G	NA	NA	NA	NA	0
471	G	NA	NA	NA	NA	0
472	G	4.2	1.5	73.7	20.5	0
473	E	2.3	2.7	79.4	15.5	0
474	A	1.6	5.1	79.2	14.2	0
475	G	1.5	8.2	75.1	15.2	0
476	A	1.1	7.7	80.4	10.7	0
477	V	0.5	9	82.5	8	0
478	A	0.1	12.2	79.6	8.1	0
479	P	NA	NA	NA	NA	0
480	Y	NA	NA	NA	NA	0
481	G	NA	NA	NA	NA	0
482	Y	1.6	6	87.6	4.9	0
483	T	NA	NA	NA	NA	0
484	R	0.3	14.2	78.7	6.8	0
485	P	NA	NA	NA	NA	0
486	P	NA	NA	NA	NA	0
487	Q	1.5	5.7	75.5	17.3	0
488	G	1.8	5.9	74.4	17.8	0
489	L	1.5	4	79.3	15.2	0
490	A	1.4	2.9	79.6	16.1	0
491	G	1.6	2.8	77.4	18.2	0
492	Q	1	2.6	82.5	14	0
493	E	0.4	3	87.1	9.5	0
494	S	0.2	4.5	88.8	6.5	0
495	D	0.4	6.3	87.2	6	0
496	F	0.5	7.2	86.6	5.8	0
497	T	0.3	7.9	84.4	7.4	0
498	A	0.1	6.8	83.3	9.8	0
499	P	NA	NA	NA	NA	0
500	D	NA	NA	NA	NA	0
501	V	NA	NA	NA	NA	0
502	W	NA	NA	NA	NA	0
503	Y	NA	NA	NA	NA	0
504	P	NA	NA	NA	NA	0
505	G	NA	NA	NA	NA	0
506	G	6.4	25	44.6	24.1	0
507	M	NA	NA	NA	NA	0
508	V	NA	NA	NA	NA	0
509	S	NA	NA	NA	NA	0
510	R	NA	NA	NA	NA	0
511	V	NA	NA	NA	NA	0
512	P	NA	NA	NA	NA	0
513	Y	NA	NA	NA	NA	0
514	P	NA	NA	NA	NA	0
515	S	NA	NA	NA	NA	0
516	P	NA	NA	NA	NA	0
517	T	NA	NA	NA	NA	0
518	C	NA	NA	NA	NA	0
519	V	NA	NA	NA	NA	0
520	K	NA	NA	NA	NA	0
521	S	NA	NA	NA	NA	0
522	E	NA	NA	NA	NA	0
523	M	NA	NA	NA	NA	0
524	G	NA	NA	NA	NA	0
525	P	NA	NA	NA	NA	0
526	W	NA	NA	NA	NA	0
527	M	NA	NA	NA	NA	0
528	D	NA	NA	NA	NA	0
529	S	NA	NA	NA	NA	0
530	Y	NA	NA	NA	NA	0
531	S	NA	NA	NA	NA	0
532	G	NA	NA	NA	NA	0
533	P	NA	NA	NA	NA	0
534	Y	NA	NA	NA	NA	0
535	G	NA	NA	NA	NA	0
536	D	NA	NA	NA	NA	0
537	M	NA	NA	NA	NA	0
538	R	NA	NA	NA	NA	0
539	L	NA	NA	NA	NA	0
540	E	NA	NA	NA	NA	0
541	T	NA	NA	NA	NA	0
542	A	NA	NA	NA	NA	0
543	R	NA	NA	NA	NA	0
544	D	NA	NA	NA	NA	0
545	H	0.3	1.4	92.4	5.8	0
546	V	NA	NA	NA	NA	0
547	L	NA	NA	NA	NA	0
548	P	NA	NA	NA	NA	0
549	I	NA	NA	NA	NA	0
550	D	NA	NA	NA	NA	0
551	Y	NA	NA	NA	NA	0
552	Y	NA	NA	NA	NA	0
553	F	NA	NA	NA	NA	0
554	P	NA	NA	NA	NA	0
555	P	NA	NA	NA	NA	0
556	Q	0	23	65.8	11.3	0
557	K	0	28.8	59.4	11.7	0
558	T	NA	NA	NA	NA	0
1	M	NA	NA	NA	NA	2.5
2	E	0	3.8	88.7	7.5	2.5
3	V	0.1	2.5	90.1	7.3	2.5
4	Q	0.6	2.5	88.4	8.5	2.5
5	L	1.7	3	85.5	9.8	2.5
6	G	2.7	5.3	77.7	14.3	2.5
7	L	2.7	7.5	74.7	15.1	2.5
8	G	1.6	10.3	71	17.2	2.5
9	R	0.6	9.1	76.7	13.6	2.5
10	V	0.2	7.2	81.4	11.2	2.5
11	Y	NA	NA	NA	NA	2.5
12	P	NA	NA	NA	NA	2.5
13	R	NA	NA	NA	NA	2.5
14	P	NA	NA	NA	NA	2.5
15	P	NA	NA	NA	NA	2.5
16	S	NA	NA	NA	NA	2.5
17	K	NA	NA	NA	NA	2.5
18	T	NA	NA	NA	NA	2.5
19	Y	NA	NA	NA	NA	2.5
20	R	NA	NA	NA	NA	2.5
21	G	5.9	3.8	74.2	16.2	2.5
22	A	3.1	4.2	82	10.6	2.5
23	F	1.6	5	85.3	8.1	2.5
24	Q	NA	NA	NA	NA	2.5
25	N	NA	NA	NA	NA	2.5
26	L	NA	NA	NA	NA	2.5
27	F	NA	NA	NA	NA	2.5
28	Q	NA	NA	NA	NA	2.5
29	S	NA	NA	NA	NA	2.5
30	V	0	3.6	90.9	5.4	2.5
31	R	0	5	88.6	6.4	2.5
32	E	0	7.4	86.7	5.9	2.5
33	V	0	9.9	84.1	6	2.5
34	I	0	14	79.1	7	2.5
35	Q	0	19.2	72.5	8.3	2.5
36	N	0	25.5	63.7	10.8	2.5
37	P	NA	NA	NA	NA	2.5
38	G	0.1	31.7	47.2	20.9	2.5
39	P	NA	NA	NA	NA	2.5
40	R	0.2	15.3	73.4	11.2	2.5
41	H	NA	NA	NA	NA	2.5
42	P	NA	NA	NA	NA	2.5
43	E	0.1	1.5	91.3	7.2	2.5
44	A	0.1	1.8	92.4	5.7	2.5
45	A	0.1	3.1	91.6	5.2	2.5
46	S	0.1	6.4	86.9	6.5	2.5
47	A	0.1	10.1	81.2	8.7	2.5
48	A	0	14.5	75.4	10.1	2.5
49	P	NA	NA	NA	NA	2.5
50	P	NA	NA	NA	NA	2.5
51	G	6.9	9.5	65.9	17.7	2.5
52	A	13.1	4.4	73.7	8.8	2.5
53	S	26.8	1.4	68	3.7	2.5
54	L	55	0	44.2	0.8	2.5
55	L	79.2	0	20.5	0.3	2.5
56	L	92.5	0	7.5	0	2.5
57	L	95.8	0	4.2	0	2.5
58	Q	94.9	0	5.1	0	2.5
59	Q	90.6	0	9.4	0	2.5
60	Q	88	0	12	0	2.5
61	Q	82.3	0	17.7	0	2.5
62	Q	NA	NA	NA	NA	2.5
63	Q	NA	NA	NA	NA	2.5
64	Q	NA	NA	NA	NA	2.5
65	Q	NA	NA	NA	NA	2.5
66	Q	NA	NA	NA	NA	2.5
67	Q	NA	NA	NA	NA	2.5
68	Q	NA	NA	NA	NA	2.5
69	Q	NA	NA	NA	NA	2.5
70	Q	NA	NA	NA	NA	2.5
71	Q	NA	NA	NA	NA	2.5
72	Q	NA	NA	NA	NA	2.5
73	Q	NA	NA	NA	NA	2.5
74	Q	NA	NA	NA	NA	2.5
75	Q	1.6	1.1	93.8	3.4	2.5
76	Q	1.1	1.5	94.3	3.1	2.5
77	Q	NA	NA	NA	NA	2.5
78	Q	NA	NA	NA	NA	2.5
79	E	0.1	8.9	81.5	9.5	2.5
80	T	0.1	11.4	78.3	10.1	2.5
81	S	0.1	14.5	75.5	9.9	2.5
82	P	NA	NA	NA	NA	2.5
83	R	0.6	10.4	83.4	5.7	2.5
84	Q	NA	NA	NA	NA	2.5
85	Q	0.2	3.5	91	5.3	2.5
86	Q	0	2.9	91	6	2.5
87	Q	0	3.1	90.1	6.9	2.5
88	Q	0.2	3.7	86	10.1	2.5
89	Q	0.7	5.3	79.3	14.7	2.5
90	G	1.1	6	74.3	18.6	2.5
91	E	1.2	5.9	76.1	16.8	2.5
92	D	1.5	8.3	73.6	16.6	2.5
93	G	1.9	13.9	65.9	18.3	2.5
94	S	1.4	16.5	67	15.2	2.5
95	P	NA	NA	NA	NA	2.5
96	Q	0.2	3.4	88.5	7.9	2.5
97	A	0.5	1.1	91	7.3	2.5
98	H	0.9	2.6	90.3	6.2	2.5
99	R	NA	NA	NA	NA	2.5
100	R	0.4	21	64.1	14.6	2.5
101	G	0.3	26.2	55.4	18.1	2.5
102	P	NA	NA	NA	NA	2.5
103	T	0.8	9.3	76.4	13.6	2.5
104	G	1	7.9	76.5	14.6	2.5
105	Y	0.6	6.9	81	11.5	2.5
106	L	0.2	4.3	86.3	9.2	2.5
107	V	0	2.8	88.7	8.5	2.5
108	L	0	2.9	89.6	7.5	2.5
109	D	0.1	3.6	89.3	7	2.5
110	E	0.1	3.2	89	7.7	2.5
111	E	0.2	5.8	86.5	7.5	2.5
112	Q	0.1	12.2	81.6	6	2.5
113	Q	0	22	72.9	5	2.5
114	P	NA	NA	NA	NA	2.5
115	S	0	26.1	66.3	7.7	2.5
116	Q	0	25.5	65.9	8.6	2.5
117	P	NA	NA	NA	NA	2.5
118	Q	0	11	83.5	5.5	2.5
119	S	0.1	7	87.3	5.6	2.5
120	A	0.2	4.2	88.7	6.9	2.5
121	L	0.2	1.7	90.6	7.4	2.5
122	E	0.2	0.6	92	7.2	2.5
123	C	0.1	0.4	93.5	6.1	2.5
124	H	NA	NA	NA	NA	2.5
125	P	NA	NA	NA	NA	2.5
126	E	0.8	3.5	84.4	11.2	2.5
127	R	1.3	6.9	78.4	13.4	2.5
128	G	1.5	10.7	71.5	16.3	2.5
129	C	0.9	9.3	75.3	14.4	2.5
130	V	0.3	10.9	76.5	12.3	2.5
131	P	NA	NA	NA	NA	2.5
132	E	0.2	26.5	60.8	12.5	2.5
133	P	NA	NA	NA	NA	2.5
134	G	0.9	13.7	67.8	17.6	2.5
135	A	0.6	5.5	85.1	8.8	2.5
136	A	0.3	1.9	94.5	3.3	2.5
137	V	0.1	0.4	98.2	1.3	2.5
138	A	0.2	0.7	96.2	2.9	2.5
139	A	0.4	1.6	93	5	2.5
140	S	0.5	5	85	9.5	2.5
141	K	0.7	11	73.9	14.4	2.5
142	G	0.6	16.9	63.5	18.9	2.5
143	L	0.4	17	66.8	15.9	2.5
144	P	NA	NA	NA	NA	2.5
145	Q	0	11.5	81.7	6.8	2.5
146	Q	0	13.4	78.5	8.1	2.5
147	L	0	16.3	73.9	9.7	2.5
148	P	NA	NA	NA	NA	2.5
149	A	0	30	63.9	6.1	2.5
150	P	NA	NA	NA	NA	2.5
151	P	NA	NA	NA	NA	2.5
152	D	0	7.7	83	9.3	2.5
153	E	0.1	8.1	83.3	8.6	2.5
154	D	0.1	6.4	86	7.5	2.5
155	D	0.2	4	88.6	7.1	2.5
156	S	0.2	3.6	89.6	6.6	2.5
157	A	0.1	5.1	87	7.8	2.5
158	A	0	8.1	83.3	8.6	2.5
159	P	NA	NA	NA	NA	2.5
160	S	0.1	8.3	85.1	6.5	2.5
161	T	0.2	6.6	87	6.2	2.5
162	L	0.4	3.5	89.8	6.3	2.5
163	S	0.5	1.4	91.5	6.6	2.5
164	L	0.6	3	88.8	7.6	2.5
165	L	0.6	8.1	82	9.2	2.5
166	G	0.4	16.4	70.1	13.1	2.5
167	P	NA	NA	NA	NA	2.5
168	T	0	13.7	75.7	10.6	2.5
169	F	0.4	9.6	78.7	11.2	2.5
170	P	NA	NA	NA	NA	2.5
171	G	2	6.1	76.3	15.6	2.5
172	L	1.3	5	82.2	11.5	2.5
173	S	0.6	6	83.6	9.9	2.5
174	S	NA	NA	NA	NA	2.5
175	C	0.2	6.3	87	6.6	2.5
176	S	0.1	4.2	89.8	5.9	2.5
177	A	0.4	3.1	90.6	5.9	2.5
178	D	0.9	2.9	90.3	5.9	2.5
179	L	1.4	2.1	91.5	5	2.5
180	K	1.1	1.7	92.2	4.9	2.5
181	D	1.1	1.8	91.9	5.3	2.5
182	I	1.3	1.2	92	5.4	2.5
183	L	1.2	0.7	93	5	2.5
184	S	4.4	0.5	90.8	4.2	2.5
185	E	11.6	0.3	85.3	2.8	2.5
186	A	19.9	0.2	78.6	1.3	2.5
187	S	22.3	0.1	77.1	0.5	2.5
188	T	29.4	0.1	70.1	0.4	2.5
189	M	43.3	0.1	56.4	0.2	2.5
190	Q	51.2	0	48.7	0.1	2.5
191	L	52.6	0	47.4	0	2.5
192	L	42.8	0	57.2	0.1	2.5
193	Q	NA	NA	NA	NA	2.5
194	Q	13.4	0.1	86.2	0.4	2.5
195	Q	6.6	0.2	92.6	0.6	2.5
196	Q	3	0.3	95.3	1.4	2.5
197	Q	0.9	0.5	96.1	2.5	2.5
198	E	0.4	0.5	95.6	3.4	2.5
199	A	0.3	0.8	95.7	3.3	2.5
200	V	0.2	1.4	94.5	3.9	2.5
201	S	0.9	2.7	88.9	7.4	2.5
202	E	2.4	4.1	81.9	11.7	2.5
203	G	3.9	5.8	74.7	15.6	2.5
204	S	3.2	5.9	76.2	14.7	2.5
205	S	NA	NA	NA	NA	2.5
206	S	NA	NA	NA	NA	2.5
207	G	3.6	11.5	67.4	17.6	2.5
208	R	1.7	5.9	79.4	13	2.5
209	A	0.6	2.7	86.2	10.5	2.5
210	R	0.1	1.3	88.9	9.7	2.5
211	E	0.1	1.7	88.8	9.4	2.5
212	A	0.3	3.9	85.8	10.1	2.5
213	S	0.5	9.8	76.5	13.3	2.5
214	G	0.6	18.1	64	17.4	2.5
215	A	0.4	20	63.8	15.8	2.5
216	P	NA	NA	NA	NA	2.5
217	T	0	12.3	78.2	9.5	2.5
218	S	0	13.4	77.7	8.8	2.5
219	S	NA	NA	NA	NA	2.5
220	K	0.2	11.7	81.6	6.5	2.5
221	D	0.2	9	84.6	6.3	2.5
222	N	0.2	7	87.3	5.5	2.5
223	Y	0.8	4.2	89.7	5.3	2.5
224	L	2.2	3.8	86.8	7.2	2.5
225	G	4.1	5.8	78.3	11.8	2.5
226	G	4.3	8.6	72.7	14.3	2.5
227	T	2.3	9.3	76.3	12.2	2.5
228	S	0.7	8.4	81	9.9	2.5
229	T	0.1	7	85.3	7.6	2.5
230	I	0.2	5.1	88.5	6.1	2.5
231	S	0.2	5	90.4	4.4	2.5
232	D	0.9	5	90.4	3.8	2.5
233	N	2	3.2	92.1	2.7	2.5
234	A	3.2	1.2	93.6	2	2.5
235	K	3	0.3	95.1	1.6	2.5
236	E	3.1	0.3	94.6	1.9	2.5
237	L	3.6	1.5	91.7	3.3	2.5
238	C	2.2	3.7	88.3	5.9	2.5
239	K	0.8	5.7	85.1	8.4	2.5
240	A	0.1	3.8	88.6	7.5	2.5
241	V	0	1.8	92.2	5.9	2.5
242	S	0	0.9	93.9	5.2	2.5
243	V	0.4	0.7	93.1	5.8	2.5
244	S	1.2	1.5	89.1	8.3	2.5
245	M	2.5	3.1	83.1	11.3	2.5
246	G	3.1	5	75.5	16.4	2.5
247	L	3	4.1	76.7	16.2	2.5
248	G	2.3	2.9	78	16.9	2.5
249	V	1.1	1.4	86.2	11.3	2.5
250	E	0.4	1	90.2	8.4	2.5
251	A	0.2	0.9	92.3	6.5	2.5
252	L	0.3	1.5	91.5	6.6	2.5
253	E	0.3	2.7	89.8	7.3	2.5
254	H	0.2	5.7	86.9	7.2	2.5
255	L	0.1	8.8	85	6.1	2.5
256	S	0.3	13.3	78.4	8.1	2.5
257	P	NA	NA	NA	NA	2.5
258	G	1.1	7.6	73.1	18.1	2.5
259	E	0.7	3.4	84	11.9	2.5
260	Q	0.4	2.1	90.2	7.4	2.5
261	L	0.5	2.5	90.6	6.4	2.5
262	R	0.8	5.7	82.8	10.7	2.5
263	G	1.1	9.4	73.9	15.6	2.5
264	D	0.7	8.3	78.2	12.7	2.5
265	C	0.4	5.2	86	8.4	2.5
266	M	0.1	4.2	89.3	6.4	2.5
267	Y	0.1	5.6	86.5	7.8	2.5
268	A	0	5.1	84.9	9.9	2.5
269	P	NA	NA	NA	NA	2.5
270	L	0.4	3.6	88.3	7.7	2.5
271	L	0.9	7.2	82.7	9.2	2.5
272	G	1.4	11.7	73.8	13.1	2.5
273	V	1.1	11.6	76.1	11.2	2.5
274	P	NA	NA	NA	NA	2.5
275	P	NA	NA	NA	NA	2.5
276	A	0	5.5	87	7.5	2.5
277	V	0	10.2	83.7	6.1	2.5
278	R	0	17.7	76	6.3	2.5
279	P	NA	NA	NA	NA	2.5
280	T	0	25.1	65.7	9.3	2.5
281	P	NA	NA	NA	NA	2.5
282	C	0	17.4	66.9	15.7	2.5
283	A	0	20.9	65.7	13.4	2.5
284	P	NA	NA	NA	NA	2.5
285	L	0.1	5.9	86	8	2.5
286	A	0	2.9	88.1	9	2.5
287	E	0	6	83.9	10	2.5
288	C	0.2	11	76.2	12.6	2.5
289	K	0.4	15.3	68	16.3	2.5
290	G	0.7	12.6	67.7	18.9	2.5
291	S	0.5	7	78.3	14.3	2.5
292	L	0.3	2.7	88	9	2.5
293	L	0.2	1.5	92.5	5.8	2.5
294	D	0.2	1.7	92.3	5.8	2.5
295	D	0.4	1.3	92.6	5.7	2.5
296	S	1.1	1.9	91.1	5.9	2.5
297	A	2.2	4.2	85.2	8.4	2.5
298	G	2.9	7.3	78	11.8	2.5
299	K	2.1	6.6	80	11.3	2.5
300	S	0.9	4.5	85.4	9.3	2.5
301	T	0.2	3	89.8	6.9	2.5
302	E	0.1	3.2	90	6.7	2.5
303	D	0.1	3.9	88.4	7.6	2.5
304	T	0.1	4.4	86.4	9.1	2.5
305	A	0.1	4.1	85.6	10.1	2.5
306	E	0.2	5.3	84.3	10.2	2.5
307	Y	0.3	7.1	84.3	8.3	2.5
308	S	0.4	7.9	86.1	5.6	2.5
309	P	NA	NA	NA	NA	2.5
310	F	1.8	5.1	87	6	2.5
311	K	3.1	6.1	80	10.9	2.5
312	G	4.4	7.7	71.2	16.7	2.5
313	G	3.3	8.7	68.9	19.1	2.5
314	Y	1.8	7.8	77.1	13.3	2.5
315	T	0.9	6.3	83.1	9.7	2.5
316	K	1.1	4.8	83.4	10.7	2.5
317	G	1.5	4	79.7	14.9	2.5
318	L	1.3	2.8	81.7	14.2	2.5
319	E	1.1	2.6	81	15.3	2.5
320	G	1	3.1	78.6	17.3	2.5
321	E	0.8	2.6	82.6	14.1	2.5
322	S	1.2	3.5	84.1	11.2	2.5
323	L	2.4	6.5	80.5	10.6	2.5
324	G	3.9	12.5	67.5	16	2.5
325	C	NA	NA	NA	NA	2.5
326	S	NA	NA	NA	NA	2.5
327	G	5	7.1	69.1	18.8	2.5
328	S	2.3	4.6	82.6	10.4	2.5
329	A	0.9	2.2	91.6	5.4	2.5
330	A	0.7	1.7	92.1	5.5	2.5
331	A	1.8	3.3	84.2	10.7	2.5
332	G	2.6	5.6	76.2	15.6	2.5
333	S	2.1	6.1	76.2	15.6	2.5
334	S	2.1	8.2	74.1	15.7	2.5
335	G	2.5	11.1	70.1	16.3	2.5
336	T	1.6	10.4	74.2	13.9	2.5
337	L	0.6	9.1	78.6	11.7	2.5
338	E	0	10.9	78.3	10.8	2.5
339	L	0	12.1	77	10.9	2.5
340	P	NA	NA	NA	NA	2.5
341	S	0.2	7.8	86.4	5.7	2.5
342	T	0.4	5.6	88.8	5.1	2.5
343	L	0.6	2.8	91.3	5.4	2.5
344	S	0.6	1	92.5	5.9	2.5
345	L	0.5	1.2	92.2	6.1	2.5
346	Y	0.4	2.6	91	6.1	2.5
347	K	0.5	4.8	85.9	8.8	2.5
348	S	1	6.1	79.4	13.4	2.5
349	G	1.8	7.1	74.9	16.2	2.5
350	A	1.5	4.2	83.9	10.4	2.5
351	L	1.3	1.7	91.3	5.7	2.5
352	D	1.6	0.3	94.2	3.9	2.5
353	E	2.6	0.1	93.9	3.3	2.5
354	A	3.3	0.1	94.8	1.8	2.5
355	A	3.3	0.2	95.5	1	2.5
356	A	3.3	0.6	94.7	1.3	2.5
357	Y	2.8	1.1	93.4	2.7	2.5
358	Q	1.5	1	92.9	4.6	2.5
359	S	0.5	0.8	92.9	5.8	2.5
360	R	NA	NA	NA	NA	2.5
361	D	NA	NA	NA	NA	2.5
362	Y	4.3	3	90.7	2.1	2.5
363	Y	NA	NA	NA	NA	2.5
364	N	0.6	2.8	92.8	3.7	2.5
365	F	0	2.6	93	4.4	2.5
366	P	NA	NA	NA	NA	2.5
367	L	NA	NA	NA	NA	2.5
368	A	0.2	1.3	90.9	7.7	2.5
369	L	0.3	4.9	85.4	9.3	2.5
370	A	0.5	11.2	74.7	13.5	2.5
371	G	0.7	21.2	59.2	19	2.5
372	P	NA	NA	NA	NA	2.5
373	P	NA	NA	NA	NA	2.5
374	P	NA	NA	NA	NA	2.5
375	P	NA	NA	NA	NA	2.5
376	P	NA	NA	NA	NA	2.5
377	P	NA	NA	NA	NA	2.5
378	P	NA	NA	NA	NA	2.5
379	P	NA	NA	NA	NA	2.5
380	H	NA	NA	NA	NA	2.5
381	P	NA	NA	NA	NA	2.5
382	H	NA	NA	NA	NA	2.5
383	A	NA	NA	NA	NA	2.5
384	R	NA	NA	NA	NA	2.5
385	I	NA	NA	NA	NA	2.5
386	K	NA	NA	NA	NA	2.5
387	L	NA	NA	NA	NA	2.5
388	E	0	6.6	83.9	9.5	2.5
389	N	NA	NA	NA	NA	2.5
390	P	NA	NA	NA	NA	2.5
391	L	NA	NA	NA	NA	2.5
392	D	0.1	1.6	91.5	6.8	2.5
393	Y	NA	NA	NA	NA	2.5
394	G	NA	NA	NA	NA	2.5
395	S	NA	NA	NA	NA	2.5
396	A	NA	NA	NA	NA	2.5
397	W	NA	NA	NA	NA	2.5
398	A	NA	NA	NA	NA	2.5
399	A	NA	NA	NA	NA	2.5
400	A	NA	NA	NA	NA	2.5
401	A	NA	NA	NA	NA	2.5
402	A	NA	NA	NA	NA	2.5
403	Q	NA	NA	NA	NA	2.5
404	C	NA	NA	NA	NA	2.5
405	R	NA	NA	NA	NA	2.5
406	Y	NA	NA	NA	NA	2.5
407	G	NA	NA	NA	NA	2.5
408	D	NA	NA	NA	NA	2.5
409	L	18.3	0.1	80.8	0.8	2.5
410	A	11.9	0.1	86.7	1.3	2.5
411	S	7	0.2	91.1	1.7	2.5
412	L	5.8	1.2	89.2	3.7	2.5
413	H	6.2	3.2	83	7.6	2.5
414	G	5.6	5.3	75.3	13.9	2.5
415	A	4.4	4.8	75.4	15.4	2.5
416	G	3.9	4.4	75.4	16.3	2.5
417	A	2.3	5.2	79.4	13.1	2.5
418	A	1	9.4	75.2	14.4	2.5
419	G	0.7	17.7	61.9	19.7	2.5
420	P	NA	NA	NA	NA	2.5
421	G	2.6	16.3	57.8	23.2	2.5
422	S	2.3	15.1	64.1	18.6	2.5
423	G	1.9	20.1	60.5	17.5	2.5
424	S	1	22.4	63.4	13.2	2.5
425	P	NA	NA	NA	NA	2.5
426	S	0.2	10.2	83.1	6.5	2.5
427	A	NA	NA	NA	NA	2.5
428	A	1.3	3.2	93.4	2.1	2.5
429	A	NA	NA	NA	NA	2.5
430	S	NA	NA	NA	NA	2.5
431	S	NA	NA	NA	NA	2.5
432	S	NA	NA	NA	NA	2.5
433	W	NA	NA	NA	NA	2.5
434	H	NA	NA	NA	NA	2.5
435	T	NA	NA	NA	NA	2.5
436	L	NA	NA	NA	NA	2.5
437	F	NA	NA	NA	NA	2.5
438	T	NA	NA	NA	NA	2.5
439	A	NA	NA	NA	NA	2.5
440	E	NA	NA	NA	NA	2.5
441	E	NA	NA	NA	NA	2.5
442	G	NA	NA	NA	NA	2.5
443	Q	NA	NA	NA	NA	2.5
444	L	NA	NA	NA	NA	2.5
445	Y	NA	NA	NA	NA	2.5
446	G	NA	NA	NA	NA	2.5
447	P	NA	NA	NA	NA	2.5
448	C	0	2.9	78.8	18.3	2.5
449	G	NA	NA	NA	NA	2.5
450	G	NA	NA	NA	NA	2.5
451	G	NA	NA	NA	NA	2.5
452	G	NA	NA	NA	NA	2.5
453	G	NA	NA	NA	NA	2.5
454	G	NA	NA	NA	NA	2.5
455	G	NA	NA	NA	NA	2.5
456	G	NA	NA	NA	NA	2.5
457	G	NA	NA	NA	NA	2.5
458	G	NA	NA	NA	NA	2.5
459	G	NA	NA	NA	NA	2.5
460	G	NA	NA	NA	NA	2.5
461	G	NA	NA	NA	NA	2.5
462	G	NA	NA	NA	NA	2.5
463	G	NA	NA	NA	NA	2.5
464	G	NA	NA	NA	NA	2.5
465	G	NA	NA	NA	NA	2.5
466	G	NA	NA	NA	NA	2.5
467	G	NA	NA	NA	NA	2.5
468	G	NA	NA	NA	NA	2.5
469	G	NA	NA	NA	NA	2.5
470	G	NA	NA	NA	NA	2.5
471	G	NA	NA	NA	NA	2.5
472	G	4.2	1.5	73.8	20.5	2.5
473	E	2.3	2.7	79.5	15.5	2.5
474	A	1.6	5	79.3	14.2	2.5
475	G	1.4	8.1	75.3	15.2	2.5
476	A	1.1	7.5	80.6	10.8	2.5
477	V	0.5	8.6	82.8	8.1	2.5
478	A	0.1	11.4	80.1	8.4	2.5
479	P	NA	NA	NA	NA	2.5
480	Y	NA	NA	NA	NA	2.5
481	G	NA	NA	NA	NA	2.5
482	Y	1.9	3.6	90.3	4.2	2.5
483	T	NA	NA	NA	NA	2.5
484	R	NA	NA	NA	NA	2.5
485	P	NA	NA	NA	NA	2.5
486	P	NA	NA	NA	NA	2.5
487	Q	1.5	5.7	75.7	17.1	2.5
488	G	1.9	5.9	74.6	17.6	2.5
489	L	1.5	4	79.4	15.1	2.5
490	A	1.4	2.9	79.6	16.1	2.5
491	G	1.6	2.8	77.4	18.2	2.5
492	Q	1	2.5	82.6	13.9	2.5
493	E	0.4	2.8	87.4	9.4	2.5
494	S	0.2	4.2	89.3	6.3	2.5
495	D	0.4	6	87.7	5.9	2.5
496	F	0.5	6.8	87	5.7	2.5
497	T	0.3	7.5	84.9	7.3	2.5
498	A	0.1	6.5	83.8	9.5	2.5
499	P	NA	NA	NA	NA	2.5
500	D	NA	NA	NA	NA	2.5
501	V	NA	NA	NA	NA	2.5
502	W	NA	NA	NA	NA	2.5
503	Y	NA	NA	NA	NA	2.5
504	P	NA	NA	NA	NA	2.5
505	G	NA	NA	NA	NA	2.5
506	G	7.4	24.2	44.6	23.7	2.5
507	M	NA	NA	NA	NA	2.5
508	V	NA	NA	NA	NA	2.5
509	S	NA	NA	NA	NA	2.5
510	R	NA	NA	NA	NA	2.5
511	V	NA	NA	NA	NA	2.5
512	P	NA	NA	NA	NA	2.5
513	Y	NA	NA	NA	NA	2.5
514	P	NA	NA	NA	NA	2.5
515	S	NA	NA	NA	NA	2.5
516	P	NA	NA	NA	NA	2.5
517	T	NA	NA	NA	NA	2.5
518	C	NA	NA	NA	NA	2.5
519	V	NA	NA	NA	NA	2.5
520	K	NA	NA	NA	NA	2.5
521	S	NA	NA	NA	NA	2.5
522	E	NA	NA	NA	NA	2.5
523	M	NA	NA	NA	NA	2.5
524	G	NA	NA	NA	NA	2.5
525	P	NA	NA	NA	NA	2.5
526	W	NA	NA	NA	NA	2.5
527	M	NA	NA	NA	NA	2.5
528	D	NA	NA	NA	NA	2.5
529	S	NA	NA	NA	NA	2.5
530	Y	NA	NA	NA	NA	2.5
531	S	NA	NA	NA	NA	2.5
532	G	NA	NA	NA	NA	2.5
533	P	NA	NA	NA	NA	2.5
534	Y	NA	NA	NA	NA	2.5
535	G	NA	NA	NA	NA	2.5
536	D	NA	NA	NA	NA	2.5
537	M	NA	NA	NA	NA	2.5
538	R	NA	NA	NA	NA	2.5
539	L	NA	NA	NA	NA	2.5
540	E	NA	NA	NA	NA	2.5
541	T	NA	NA	NA	NA	2.5
542	A	NA	NA	NA	NA	2.5
543	R	NA	NA	NA	NA	2.5
544	D	NA	NA	NA	NA	2.5
545	H	NA	NA	NA	NA	2.5
546	V	NA	NA	NA	NA	2.5
547	L	NA	NA	NA	NA	2.5
548	P	NA	NA	NA	NA	2.5
549	I	NA	NA	NA	NA	2.5
550	D	NA	NA	NA	NA	2.5
551	Y	NA	NA	NA	NA	2.5
552	Y	NA	NA	NA	NA	2.5
553	F	NA	NA	NA	NA	2.5
554	P	NA	NA	NA	NA	2.5
555	P	NA	NA	NA	NA	2.5
556	Q	0	23.5	64.7	11.8	2.5
557	K	0	29.2	58.6	12.2	2.5
558	T	NA	NA	NA	NA	2.5
1	M	NA	NA	NA	NA	5
2	E	0	3.3	89.7	7	5
3	V	0.2	2	91.1	6.7	5
4	Q	0.7	2	89.4	8	5
5	L	1.8	2.6	86.2	9.4	5
6	G	2.9	5	78.2	13.9	5
7	L	2.8	7.3	75	14.9	5
8	G	1.8	10.6	69.9	17.7	5
9	R	0.9	10.5	73.8	14.8	5
10	V	NA	NA	NA	NA	5
11	Y	NA	NA	NA	NA	5
12	P	NA	NA	NA	NA	5
13	R	NA	NA	NA	NA	5
14	P	NA	NA	NA	NA	5
15	P	NA	NA	NA	NA	5
16	S	NA	NA	NA	NA	5
17	K	NA	NA	NA	NA	5
18	T	NA	NA	NA	NA	5
19	Y	NA	NA	NA	NA	5
20	R	NA	NA	NA	NA	5
21	G	NA	NA	NA	NA	5
22	A	0.3	5.4	91.4	2.8	5
23	F	NA	NA	NA	NA	5
24	Q	NA	NA	NA	NA	5
25	N	NA	NA	NA	NA	5
26	L	NA	NA	NA	NA	5
27	F	NA	NA	NA	NA	5
28	Q	NA	NA	NA	NA	5
29	S	NA	NA	NA	NA	5
30	V	0	2.9	91.7	5.4	5
31	R	0	3.5	89.7	6.7	5
32	E	NA	NA	NA	NA	5
33	V	0	8.1	85.6	6.4	5
34	I	0	9.5	83.7	6.8	5
35	Q	0	10.1	82.3	7.7	5
36	N	NA	NA	NA	NA	5
37	P	NA	NA	NA	NA	5
38	G	0.2	36.6	37.1	26.1	5
39	P	NA	NA	NA	NA	5
40	R	NA	NA	NA	NA	5
41	H	NA	NA	NA	NA	5
42	P	NA	NA	NA	NA	5
43	E	0.1	1.4	91.5	7	5
44	A	0.1	1.7	92.7	5.5	5
45	A	0.2	2.9	92	5	5
46	S	0.1	6.1	87.5	6.3	5
47	A	0.1	9.7	81.6	8.6	5
48	A	0	13.9	75.7	10.3	5
49	P	NA	NA	NA	NA	5
50	P	NA	NA	NA	NA	5
51	G	NA	NA	NA	NA	5
52	A	18.5	0.1	80.4	1	5
53	S	NA	NA	NA	NA	5
54	L	73.6	0	26.2	0.2	5
55	L	89.3	0	10.7	0	5
56	L	94.8	0	5.2	0	5
57	L	98.3	0	1.7	0	5
58	Q	99.2	0	0.8	0	5
59	Q	NA	NA	NA	NA	5
60	Q	NA	NA	NA	NA	5
61	Q	NA	NA	NA	NA	5
62	Q	NA	NA	NA	NA	5
63	Q	NA	NA	NA	NA	5
64	Q	NA	NA	NA	NA	5
65	Q	NA	NA	NA	NA	5
66	Q	NA	NA	NA	NA	5
67	Q	NA	NA	NA	NA	5
68	Q	NA	NA	NA	NA	5
69	Q	NA	NA	NA	NA	5
70	Q	NA	NA	NA	NA	5
71	Q	NA	NA	NA	NA	5
72	Q	NA	NA	NA	NA	5
73	Q	NA	NA	NA	NA	5
74	Q	NA	NA	NA	NA	5
75	Q	NA	NA	NA	NA	5
76	Q	NA	NA	NA	NA	5
77	Q	NA	NA	NA	NA	5
78	Q	NA	NA	NA	NA	5
79	E	0.2	7.9	82.7	9.1	5
80	T	0.1	10.4	79.5	10	5
81	S	0.1	13.4	76.7	9.8	5
82	P	NA	NA	NA	NA	5
83	R	0.7	9.5	84.8	5	5
84	Q	NA	NA	NA	NA	5
85	Q	0.1	3.2	92.8	3.9	5
86	Q	0	2.6	92.3	5.1	5
87	Q	0	2.8	90.8	6.4	5
88	Q	0.4	5.3	85.1	9.1	5
89	Q	1.2	10.2	75.9	12.7	5
90	G	2	14.3	68.3	15.4	5
91	E	1.8	10.9	72.4	14.9	5
92	D	1.8	9.9	72.4	15.9	5
93	G	2.1	13.7	66	18.3	5
94	S	1.5	16.4	67.1	15.1	5
95	P	NA	NA	NA	NA	5
96	Q	0.2	3.3	88.7	7.8	5
97	A	0.6	1	91.2	7.2	5
98	H	0.9	2.4	90.6	6	5
99	R	NA	NA	NA	NA	5
100	R	0.4	20.4	64.6	14.6	5
101	G	0.3	25.9	55.7	18.2	5
102	P	NA	NA	NA	NA	5
103	T	0.8	9.2	76.6	13.4	5
104	G	1	7.8	76.8	14.5	5
105	Y	0.6	6.8	81.3	11.3	5
106	L	0.2	4.2	86.6	8.9	5
107	V	0	2.7	89	8.3	5
108	L	0	2.7	90	7.3	5
109	D	0.1	3.4	90	6.6	5
110	E	0.1	3	90.2	6.8	5
111	E	0.1	5.6	88.2	6.2	5
112	Q	0	11.9	82.9	5.2	5
113	Q	0	21.6	73.8	4.7	5
114	P	NA	NA	NA	NA	5
115	S	0	25.4	66.9	7.6	5
116	Q	0	24.9	66.4	8.7	5
117	P	NA	NA	NA	NA	5
118	Q	0	10.7	83.9	5.4	5
119	S	0.1	6.7	87.8	5.5	5
120	A	0.2	4	89.2	6.6	5
121	L	0.3	1.6	91	7.1	5
122	E	0.2	0.6	92.5	6.8	5
123	C	0.1	0.3	94	5.6	5
124	H	NA	NA	NA	NA	5
125	P	NA	NA	NA	NA	5
126	E	0.9	3.4	84.7	11	5
127	R	1.4	6.8	78.6	13.2	5
128	G	1.6	10.5	71.8	16.1	5
129	C	1	9	75.7	14.3	5
130	V	0.4	10.3	77	12.3	5
131	P	NA	NA	NA	NA	5
132	E	0.2	25.5	61.7	12.6	5
133	P	NA	NA	NA	NA	5
134	G	1	13.2	68.3	17.5	5
135	A	0.7	5.2	85.4	8.7	5
136	A	0.3	1.8	94.7	3.2	5
137	V	0.2	0.3	98.3	1.2	5
138	A	0.3	0.6	96.4	2.7	5
139	A	0.5	1.5	93.3	4.8	5
140	S	0.6	4.7	85.4	9.4	5
141	K	0.7	10.6	74.3	14.4	5
142	G	0.7	16.5	63.9	18.9	5
143	L	0.4	16.5	67.2	15.9	5
144	P	NA	NA	NA	NA	5
145	Q	0	11.3	81.8	6.9	5
146	Q	0	12.9	78.9	8.2	5
147	L	0	15.4	74.7	9.8	5
148	P	NA	NA	NA	NA	5
149	A	0	29.4	64.4	6.2	5
150	P	NA	NA	NA	NA	5
151	P	NA	NA	NA	NA	5
152	D	0	7.5	83.1	9.4	5
153	E	0.1	7.8	83.5	8.6	5
154	D	0.1	6.2	86.2	7.5	5
155	D	0.2	3.9	88.7	7.1	5
156	S	0.2	3.5	89.7	6.6	5
157	A	0.1	4.9	87.2	7.8	5
158	A	0	7.7	83.8	8.5	5
159	P	NA	NA	NA	NA	5
160	S	0.1	7.7	85.8	6.3	5
161	T	0.3	6.1	87.8	5.8	5
162	L	0.5	3.2	90.5	5.8	5
163	S	0.6	1.2	92.2	6	5
164	L	0.7	2.8	89.5	7	5
165	L	0.8	7.8	82.8	8.7	5
166	G	0.5	15.9	71	12.6	5
167	P	NA	NA	NA	NA	5
168	T	0	13.1	76.7	10.2	5
169	F	0.5	9	79.7	10.8	5
170	P	NA	NA	NA	NA	5
171	G	2.2	5.6	77	15.3	5
172	L	1.5	4.4	82.9	11.2	5
173	S	0.8	4.5	84.7	10	5
174	S	NA	NA	NA	NA	5
175	C	NA	NA	NA	NA	5
176	S	0.1	2.1	92.4	5.3	5
177	A	0.6	2.3	91.7	5.5	5
178	D	1.3	2.6	90.7	5.4	5
179	L	1.9	1.8	91.9	4.4	5
180	K	1.6	1.5	92.7	4.2	5
181	D	1.5	1.9	91.8	4.8	5
182	I	1.7	2.1	90.7	5.5	5
183	L	NA	NA	NA	NA	5
184	S	8.2	0.6	87.7	3.5	5
185	E	19.9	0.2	77.8	2.1	5
186	A	33.1	0.1	65.8	1	5
187	S	37.7	0.1	61.8	0.4	5
188	T	45.7	0.1	54	0.2	5
189	M	62.2	0	37.6	0.1	5
190	Q	74.4	0	25.6	0	5
191	L	74.8	0	25.2	0	5
192	L	62.9	0	37.1	0	5
193	Q	NA	NA	NA	NA	5
194	Q	30.2	0	69.6	0.2	5
195	Q	18	0.1	81.6	0.3	5
196	Q	8.9	0.2	90	0.9	5
197	Q	2.9	0.3	95	1.8	5
198	E	1	0.3	96.1	2.6	5
199	A	0.5	0.5	96.5	2.5	5
200	V	0.3	1	95.5	3.2	5
201	S	1	2.1	90.1	6.7	5
202	E	2.5	3.5	82.9	11.1	5
203	G	4.1	5.2	75.6	15.1	5
204	S	3.3	5.2	77.3	14.2	5
205	S	NA	NA	NA	NA	5
206	S	NA	NA	NA	NA	5
207	G	3.6	11.2	67.7	17.5	5
208	R	1.8	5.7	79.7	12.8	5
209	A	0.7	2.5	86.6	10.2	5
210	R	0.1	1.2	89.3	9.4	5
211	E	0.1	1.5	89.2	9.2	5
212	A	0.3	3.7	86	10	5
213	S	0.5	9.7	76.7	13.2	5
214	G	0.6	17.9	64.2	17.3	5
215	A	0.4	19.7	64.2	15.7	5
216	P	NA	NA	NA	NA	5
217	T	0	11.8	78.7	9.5	5
218	S	0.1	12.9	78.3	8.8	5
219	S	NA	NA	NA	NA	5
220	K	0.2	11.2	82.3	6.3	5
221	D	0.2	8.5	85.3	6	5
222	N	0.2	6.6	87.9	5.3	5
223	Y	0.8	4	90	5.2	5
224	L	2.3	3.7	87	7.1	5
225	G	4.1	5.8	78.5	11.6	5
226	G	4.3	8.5	73	14.2	5
227	T	2.3	9	76.7	12	5
228	S	0.7	7.9	81.7	9.7	5
229	T	0.1	6.5	86.1	7.3	5
230	I	0.3	4.6	89.4	5.7	5
231	S	0.4	4.3	91.5	3.9	5
232	D	1.4	4.2	91.2	3.2	5
233	N	3.2	2.7	92	2.2	5
234	A	5	1	92.5	1.6	5
235	K	5	0.2	93.6	1.2	5
236	E	5.3	0.2	93	1.5	5
237	L	6.5	0.3	91.4	1.8	5
238	C	4.6	0.4	92.5	2.5	5
239	K	NA	NA	NA	NA	5
240	A	0.1	0.4	95.6	3.9	5
241	V	0.1	0.4	95.7	3.8	5
242	S	0.1	0.5	95.4	4	5
243	V	0.1	0.5	94.5	4.9	5
244	S	0.5	1.6	89.3	8.6	5
245	M	NA	NA	NA	NA	5
246	G	3.1	5.7	71.4	19.8	5
247	L	3	4.1	76	16.9	5
248	G	2.3	2.7	78.5	16.5	5
249	V	1.1	1.3	86.8	10.9	5
250	E	0.5	0.8	90.9	7.9	5
251	A	0.4	0.7	93.1	5.8	5
252	L	0.7	0.7	93	5.5	5
253	E	0.9	0.8	92.7	5.6	5
254	H	NA	NA	NA	NA	5
255	L	0.2	8.5	86.7	4.7	5
256	S	0.3	13.2	78.7	7.8	5
257	P	NA	NA	NA	NA	5
258	G	1.3	7.2	73.8	17.7	5
259	E	0.8	3.1	84.6	11.5	5
260	Q	0.5	1.8	90.7	6.9	5
261	L	0.6	2.3	91.1	6	5
262	R	0.9	5.5	83.2	10.4	5
263	G	1.2	9.2	74.3	15.3	5
264	D	0.8	8.1	78.6	12.6	5
265	C	0.4	5	86.3	8.3	5
266	M	0.1	3.8	89.8	6.2	5
267	Y	0.1	5	87.4	7.5	5
268	A	0.1	4.4	86.1	9.5	5
269	P	NA	NA	NA	NA	5
270	L	0.5	3.5	88.8	7.3	5
271	L	1	7	83	9	5
272	G	1.5	11.5	74.2	12.8	5
273	V	1.2	11.3	76.6	10.9	5
274	P	NA	NA	NA	NA	5
275	P	NA	NA	NA	NA	5
276	A	0	5.4	87.1	7.5	5
277	V	0	9.9	83.8	6.2	5
278	R	0	17.2	76.3	6.5	5
279	P	NA	NA	NA	NA	5
280	T	0	24	66.6	9.4	5
281	P	NA	NA	NA	NA	5
282	C	0	16.8	67.7	15.5	5
283	A	0	20.1	66.6	13.3	5
284	P	NA	NA	NA	NA	5
285	L	0.1	5.6	86.4	7.9	5
286	A	0	2.7	88.5	8.8	5
287	E	0	5.7	84.4	9.8	5
288	C	0.2	10.7	76.6	12.5	5
289	K	0.5	15.1	68.1	16.3	5
290	G	0.7	12.6	67.7	19	5
291	S	0.5	6.9	78.3	14.2	5
292	L	0.3	2.6	88.1	8.9	5
293	L	0.2	1.4	92.7	5.6	5
294	D	0.2	1.6	92.5	5.7	5
295	D	0.4	1.2	92.8	5.6	5
296	S	1.1	1.9	91.2	5.8	5
297	A	2.2	4	85.4	8.4	5
298	G	2.9	7	78.3	11.8	5
299	K	1.9	6.2	80.5	11.4	5
300	S	0.8	4.2	85.8	9.2	5
301	T	0.2	2.8	90.2	6.8	5
302	E	0.1	3	90.4	6.5	5
303	D	0.1	3.7	88.8	7.4	5
304	T	0.1	4.3	86.8	8.9	5
305	A	0.2	3.9	86	9.9	5
306	E	0.2	5	84.7	10	5
307	Y	0.3	6.6	84.9	8.2	5
308	S	0.4	7.3	86.9	5.5	5
309	P	NA	NA	NA	NA	5
310	F	2.2	6	86.2	5.6	5
311	K	3.9	9.1	76.6	10.4	5
312	G	5.7	12.5	65.6	16.2	5
313	G	4.2	11.5	65.4	18.8	5
314	Y	2.2	8.5	76.1	13.1	5
315	T	1	5.9	83.4	9.7	5
316	K	1.1	4.6	83.6	10.7	5
317	G	1.5	3.8	79.9	14.7	5
318	L	1.4	2.7	82	14	5
319	E	1.2	2.5	81.3	15	5
320	G	1.1	3.1	78.8	17	5
321	E	0.8	2.5	82.7	14	5
322	S	1.3	3.4	84.2	11.2	5
323	L	2.5	6.3	80.6	10.6	5
324	G	4.1	12.1	67.8	16	5
325	C	NA	NA	NA	NA	5
326	S	NA	NA	NA	NA	5
327	G	5.1	6.9	69.3	18.7	5
328	S	2.4	4.5	82.8	10.3	5
329	A	0.9	2.1	91.8	5.3	5
330	A	0.8	1.6	92.2	5.4	5
331	A	1.8	3.3	84.3	10.6	5
332	G	2.7	5.5	76.3	15.5	5
333	S	2.1	6	76.2	15.6	5
334	S	2.1	8.2	74	15.7	5
335	G	2.5	11	70.2	16.3	5
336	T	1.5	10.2	74.5	13.8	5
337	L	0.6	8.6	79.3	11.5	5
338	E	0	10.2	79.3	10.5	5
339	L	0	11	78.6	10.4	5
340	P	NA	NA	NA	NA	5
341	S	0.3	6.7	87.9	5.1	5
342	T	0.6	4.8	90.1	4.5	5
343	L	0.9	2.3	92.2	4.6	5
344	S	0.8	0.8	93.3	5.1	5
345	L	0.7	1	92.9	5.4	5
346	Y	0.5	2.2	91.8	5.5	5
347	K	0.6	4.1	86.9	8.4	5
348	S	1.1	5.5	80.4	13	5
349	G	2	6.6	75.6	15.8	5
350	A	1.7	4	84.3	10.1	5
351	L	1.6	1.6	91.4	5.4	5
352	D	2.3	0.2	94	3.5	5
353	E	4.1	0.1	92.9	2.9	5
354	A	5.3	0	93.1	1.5	5
355	A	5	0.2	94.1	0.8	5
356	A	5	0.4	93.9	0.7	5
357	Y	5.4	0.8	93	0.8	5
358	Q	NA	NA	NA	NA	5
359	S	NA	NA	NA	NA	5
360	R	NA	NA	NA	NA	5
361	D	NA	NA	NA	NA	5
362	Y	NA	NA	NA	NA	5
363	Y	NA	NA	NA	NA	5
364	N	NA	NA	NA	NA	5
365	F	NA	NA	NA	NA	5
366	P	NA	NA	NA	NA	5
367	L	NA	NA	NA	NA	5
368	A	NA	NA	NA	NA	5
369	L	NA	NA	NA	NA	5
370	A	NA	NA	NA	NA	5
371	G	0.8	35.2	37.7	26.3	5
372	P	NA	NA	NA	NA	5
373	P	NA	NA	NA	NA	5
374	P	NA	NA	NA	NA	5
375	P	NA	NA	NA	NA	5
376	P	NA	NA	NA	NA	5
377	P	NA	NA	NA	NA	5
378	P	NA	NA	NA	NA	5
379	P	NA	NA	NA	NA	5
380	H	NA	NA	NA	NA	5
381	P	NA	NA	NA	NA	5
382	H	NA	NA	NA	NA	5
383	A	NA	NA	NA	NA	5
384	R	NA	NA	NA	NA	5
385	I	NA	NA	NA	NA	5
386	K	NA	NA	NA	NA	5
387	L	NA	NA	NA	NA	5
388	E	NA	NA	NA	NA	5
389	N	NA	NA	NA	NA	5
390	P	NA	NA	NA	NA	5
391	L	NA	NA	NA	NA	5
392	D	NA	NA	NA	NA	5
393	Y	NA	NA	NA	NA	5
394	G	NA	NA	NA	NA	5
395	S	NA	NA	NA	NA	5
396	A	NA	NA	NA	NA	5
397	W	NA	NA	NA	NA	5
398	A	NA	NA	NA	NA	5
399	A	NA	NA	NA	NA	5
400	A	NA	NA	NA	NA	5
401	A	NA	NA	NA	NA	5
402	A	NA	NA	NA	NA	5
403	Q	NA	NA	NA	NA	5
404	C	NA	NA	NA	NA	5
405	R	NA	NA	NA	NA	5
406	Y	NA	NA	NA	NA	5
407	G	NA	NA	NA	NA	5
408	D	NA	NA	NA	NA	5
409	L	NA	NA	NA	NA	5
410	A	NA	NA	NA	NA	5
411	S	NA	NA	NA	NA	5
412	L	NA	NA	NA	NA	5
413	H	NA	NA	NA	NA	5
414	G	NA	NA	NA	NA	5
415	A	3.9	2.7	80.2	13.1	5
416	G	4.1	3.5	77.4	15.1	5
417	A	2.4	5	79.7	12.8	5
418	A	1.1	9.2	75.5	14.2	5
419	G	0.7	17.5	62.2	19.6	5
420	P	NA	NA	NA	NA	5
421	G	2.6	16.3	57.9	23.2	5
422	S	2.3	15	64.2	18.4	5
423	G	1.9	19.9	60.8	17.4	5
424	S	1	21.9	64	13	5
425	P	NA	NA	NA	NA	5
426	S	0.3	9.6	83.8	6.3	5
427	A	NA	NA	NA	NA	5
428	A	1.6	2.8	93.7	1.9	5
429	A	NA	NA	NA	NA	5
430	S	NA	NA	NA	NA	5
431	S	NA	NA	NA	NA	5
432	S	NA	NA	NA	NA	5
433	W	NA	NA	NA	NA	5
434	H	NA	NA	NA	NA	5
435	T	NA	NA	NA	NA	5
436	L	NA	NA	NA	NA	5
437	F	NA	NA	NA	NA	5
438	T	NA	NA	NA	NA	5
439	A	NA	NA	NA	NA	5
440	E	NA	NA	NA	NA	5
441	E	NA	NA	NA	NA	5
442	G	NA	NA	NA	NA	5
443	Q	NA	NA	NA	NA	5
444	L	NA	NA	NA	NA	5
445	Y	NA	NA	NA	NA	5
446	G	NA	NA	NA	NA	5
447	P	NA	NA	NA	NA	5
448	C	0	2.4	79.9	17.6	5
449	G	NA	NA	NA	NA	5
450	G	NA	NA	NA	NA	5
451	G	NA	NA	NA	NA	5
452	G	NA	NA	NA	NA	5
453	G	NA	NA	NA	NA	5
454	G	NA	NA	NA	NA	5
455	G	NA	NA	NA	NA	5
456	G	NA	NA	NA	NA	5
457	G	NA	NA	NA	NA	5
458	G	NA	NA	NA	NA	5
459	G	NA	NA	NA	NA	5
460	G	NA	NA	NA	NA	5
461	G	NA	NA	NA	NA	5
462	G	NA	NA	NA	NA	5
463	G	NA	NA	NA	NA	5
464	G	NA	NA	NA	NA	5
465	G	NA	NA	NA	NA	5
466	G	NA	NA	NA	NA	5
467	G	NA	NA	NA	NA	5
468	G	NA	NA	NA	NA	5
469	G	NA	NA	NA	NA	5
470	G	NA	NA	NA	NA	5
471	G	NA	NA	NA	NA	5
472	G	4.2	1.5	73.9	20.4	5
473	E	2.4	2.6	79.6	15.4	5
474	A	1.6	4.9	79.4	14.1	5
475	G	1.5	7.9	75.5	15.1	5
476	A	1.1	7.2	81	10.7	5
477	V	0.5	8.1	83.3	8.1	5
478	A	0.1	10.7	80.8	8.4	5
479	P	NA	NA	NA	NA	5
480	Y	NA	NA	NA	NA	5
481	G	NA	NA	NA	NA	5
482	Y	NA	NA	NA	NA	5
483	T	NA	NA	NA	NA	5
484	R	NA	NA	NA	NA	5
485	P	NA	NA	NA	NA	5
486	P	NA	NA	NA	NA	5
487	Q	1.5	5.3	76.2	16.9	5
488	G	1.9	5.6	75	17.5	5
489	L	1.5	3.9	79.7	14.9	5
490	A	1.5	2.8	79.8	15.9	5
491	G	1.8	2.6	77.7	17.9	5
492	Q	1.1	2.4	82.8	13.7	5
493	E	0.5	2.7	87.6	9.3	5
494	S	0.2	4.1	89.4	6.3	5
495	D	0.5	5.2	88.6	5.8	5
496	F	0.7	4.8	89.3	5.3	5
497	T	NA	NA	NA	NA	5
498	A	0.2	3.1	85.9	10.9	5
499	P	NA	NA	NA	NA	5
500	D	NA	NA	NA	NA	5
501	V	NA	NA	NA	NA	5
502	W	NA	NA	NA	NA	5
503	Y	NA	NA	NA	NA	5
504	P	NA	NA	NA	NA	5
505	G	NA	NA	NA	NA	5
506	G	NA	NA	NA	NA	5
507	M	NA	NA	NA	NA	5
508	V	NA	NA	NA	NA	5
509	S	NA	NA	NA	NA	5
510	R	NA	NA	NA	NA	5
511	V	NA	NA	NA	NA	5
512	P	NA	NA	NA	NA	5
513	Y	NA	NA	NA	NA	5
514	P	NA	NA	NA	NA	5
515	S	NA	NA	NA	NA	5
516	P	NA	NA	NA	NA	5
517	T	NA	NA	NA	NA	5
518	C	NA	NA	NA	NA	5
519	V	NA	NA	NA	NA	5
520	K	NA	NA	NA	NA	5
521	S	NA	NA	NA	NA	5
522	E	NA	NA	NA	NA	5
523	M	NA	NA	NA	NA	5
524	G	NA	NA	NA	NA	5
525	P	NA	NA	NA	NA	5
526	W	NA	NA	NA	NA	5
527	M	NA	NA	NA	NA	5
528	D	NA	NA	NA	NA	5
529	S	NA	NA	NA	NA	5
530	Y	NA	NA	NA	NA	5
531	S	NA	NA	NA	NA	5
532	G	NA	NA	NA	NA	5
533	P	NA	NA	NA	NA	5
534	Y	NA	NA	NA	NA	5
535	G	NA	NA	NA	NA	5
536	D	NA	NA	NA	NA	5
537	M	NA	NA	NA	NA	5
538	R	NA	NA	NA	NA	5
539	L	NA	NA	NA	NA	5
540	E	NA	NA	NA	NA	5
541	T	NA	NA	NA	NA	5
542	A	NA	NA	NA	NA	5
543	R	NA	NA	NA	NA	5
544	D	NA	NA	NA	NA	5
545	H	NA	NA	NA	NA	5
546	V	NA	NA	NA	NA	5
547	L	NA	NA	NA	NA	5
548	P	NA	NA	NA	NA	5
549	I	NA	NA	NA	NA	5
550	D	NA	NA	NA	NA	5
551	Y	NA	NA	NA	NA	5
552	Y	NA	NA	NA	NA	5
553	F	NA	NA	NA	NA	5
554	P	NA	NA	NA	NA	5
555	P	NA	NA	NA	NA	5
556	Q	0	23	65.4	11.6	5
557	K	0	29	58.9	12.2	5
558	T	NA	NA	NA	NA	5

## Sheet: F3C
Tc of P mutants and TFE
Mutant	Tc (ºC) repetition1	Tc (ºC) repetition2	Tc (ºC) repetition3	Mean Tc ( ºC)	SD Tc (ºC)			TFE (% w/v)	Tc (ºC)
WT	25.8331	24.3046	23.3329	24.4902	1.0291			0	47.5867
L26P (WT*)	31.5763	32.0817	33.3367	32.3316	0.740068			2.5	33.8129
L26P L56P	38.2272	38.3892	37.0512	37.8892	0.596227			5	12.5741
L26P+Tau-1	37.2739	38.7	40.1394	38.7044	1.16982
L26P+Tau-5	40.7635	42.0197	43.3277	42.037	1.04689
L26P+L56P+Tau-1+Tau-5	48.3898	47.2006	46.5641	47.3849	0.756629

## Sheet: F3E
WT Tau1 Tau5 Droplet size
				um			um2
	5	15	30	5	15	30	5	15	30
dNLS	6.871	12.385	17.05	1.603	2.88942	3.97777	0.373782	0.673744	0.92752
	4.525	9.14	7.228	1.05568	2.13236	1.68629	0.24616	0.497216	0.393203
	5.556	7.75	9.395	1.29621	1.80808	2.19185	0.302246	0.4216	0.511088
	2.471	8.556	9.423	0.576484	1.99611	2.19839	0.134422	0.465446	0.512611
	6.737	11.867	11.238	1.57174	2.76857	2.62183	0.366493	0.645565	0.611347
	6.429	14.741	21.167	1.49989	3.43908	4.93826	0.349738	0.80191	1.15148
	11.4	20	30.643	2.65962	4.666	7.14901	0.62016	1.088	1.66698
	4.429	18.938	29.273	1.03329	4.41824	6.82939	0.240938	1.03023	1.59245
	10	12.512	12.636	2.333	2.91905	2.94798	0.544	0.680653	0.687398
	8.37	11.178	15.76	1.95272	2.60783	3.67681	0.455328	0.608083	0.857344
	4.211	9.167	10.892	0.982426	2.13866	2.5411	0.229078	0.498685	0.592525
	13.026	11.5	24.059	3.03897	2.68295	5.61296	0.708614	0.6256	1.30881
	15.077	18.588	27.941	3.51746	4.33658	6.51864	0.820189	1.01119	1.51999
	7.021	13.476	24.529	1.638	3.14395	5.72262	0.381942	0.733094	1.33438
	7.086	10.256	24.069	1.65316	2.39272	5.6153	0.385478	0.557926	1.30935
	10.579	30.294	29.647	2.46808	7.06759	6.91665	0.575498	1.64799	1.6128
	8.176	12.812	13	1.90746	2.98904	3.0329	0.444774	0.696973	0.7072
	10.05	14.14	18.172	2.34467	3.29886	4.23953	0.54672	0.769216	0.988557
	1.692	7	10.727	0.394744	1.6331	2.50261	0.0920448	0.3808	0.583549
	0	3.788	7.097				0	0.206067	0.386077
	4.852	7.562	11.421	1.13197	1.76421	2.66452	0.263949	0.411373	0.621302
	3.525	5.812	6.939	0.822383	1.35594	1.61887	0.19176	0.316173	0.377482
	14.4	21	27.6	3.35952	4.8993	6.43908	0.78336	1.1424	1.50144
	6.985	7.915	8	1.6296	1.84657	1.8664	0.379984	0.430576	0.4352
	3.115	6.654	5.941	0.72673	1.55238	1.38604	0.169456	0.361978	0.32319
	0	16.556	18.8	0	3.86251	4.38604	0	0.900646	1.02272
	0	8.75	30.6	0	2.04137	7.13898	0	0.476	1.66464
	14.278	21.864	22.118	3.33106	5.10087	5.16013	0.776723	1.1894	1.20322
Tau1	1.739	7.967	9.895	0.405709	1.8587	2.3085	0.0946016	0.433405	0.538288
	1.25	3.957	5.615	0.291625	0.923168	1.30998	0.068	0.215261	0.305456
	6.267	18.529	26.286	1.46209	4.32282	6.13252	0.340925	1.00798	1.42996
	2.067	9.348	11.088	0.482231	2.18089	2.58683	0.112445	0.508531	0.603187
	2.5	12.3	16.364	0.58325	2.86959	3.81772	0.136	0.66912	0.890202
	1.455	11.217	21	0.339452	2.61693	4.8993	0.079152	0.610205	1.1424
	0	9.733	14.357	0	2.27071	3.34949	0	0.529475	0.781021
	0	6.694	13.4	0	1.56171	3.12622	0	0.364154	0.72896
	6.75	11.792	35.1	1.57478	2.75107	8.18883	0.3672	0.641485	1.90944
	9.045	24.929	3.75	2.1102	5.81594	0.874875	0.492048	1.35614	0.204
	1.474	1.905	14.92	0.343884	0.444437	3.48084	0.0801856	0.103632	0.811648
	9.268	20.857	20.214	2.16222	4.86594	4.71593	0.504179	1.13462	1.09964
	7.76	26.545	31.333	1.81041	6.19295	7.30999	0.422144	1.44405	1.70452
	1.905	3.5	3.625	0.444437	0.81655	0.845712	0.103632	0.1904	0.1972
	1.357	1.333	1.8	0.316588	0.310989	0.41994	0.0738208	0.0725152	0.09792
	5.294	6.682	7.522	1.23509	1.55891	1.75488	0.287994	0.363501	0.409197
	4.854	10.174	11.576	1.13244	2.37359	2.70068	0.264058	0.553466	0.629734
	5.426	10.459	6.94	1.26589	2.44008	1.6191	0.295174	0.56897	0.377536
	15.065	14.607	18.24	3.51466	3.40781	4.25539	0.819536	0.794621	0.992256
	0	25.059	30.882	0	5.84626	7.20477	0	1.36321	1.67998
	12.184	23.6	27.957	2.84253	5.50588	6.52237	0.66281	1.28384	1.52086
	4.472	16	19.967	1.04332	3.7328	4.6583	0.243277	0.8704	1.0862
Tau5	0	0	12.25	0	0	2.85793	0	0	0.6664
	0	3	5.857	0	0.6999	1.36644	0	0.1632	0.318621
	0	3.588	3.4	0	0.83708	0.79322	0	0.195187	0.18496
	0	4	7.769	0	0.9332	1.81251	0	0.2176	0.422634
	0	0	2.778	0	0	0.648107	0	0	0.151123
	0	2.222	3.824	0	0.518393	0.892139	0	0.120877	0.208026
	1.143	11.143	12.25	0.266662	2.59966	2.85793	0.0621792	0.606179	0.6664
	0	0	2.25	0	0	0.524925	0	0	0.1224
	0	0	3.526	0	0	0.822616	0	0	0.191814
	5.1	10.343	12.286	1.18983	2.41302	2.86632	0.27744	0.562659	0.668358
	0	0	7	0	0	1.6331	0	0	0.3808
	0	27.875	28	0	6.50324	6.5324	0	1.5164	1.5232
	0	6.286	6.524	0	1.46652	1.52205	0	0.341958	0.354906
	0	15.947	18.346	0	3.72044	4.28012	0	0.867517	0.998022
	0	8	10.385	0	1.8664	2.42282	0	0.4352	0.564944
	0	4.458	9.154	0	1.04005	2.13563	0	0.242515	0.497978
	0	3.5	3.292	0	0.81655	0.768024	0	0.1904	0.179085
	5.534	14.767	25	1.29108	3.44514	5.8325	0.30105	0.803325	1.36
	0	4.985	4.941	0	1.163	1.15274	0	0.271184	0.26879
	0	2.769	4.27	0	0.646008	0.996191	0	0.150634	0.232288
	7.595	9.61	11.438	1.77191	2.24201	2.66849	0.413168	0.522784	0.622227
	0	8.667	12.571	0	2.02201	2.93281	0	0.471485	0.683862
	6.123	10.415	18.29	1.4285	2.42982	4.26706	0.333091	0.566576	0.994976

## Sheet: F3G
Droplet size and density
Droplet size (um^2)				Density (droplets / 10^3um^2)
WT	deltaFQNLF			WT	deltaFQNLF
0.21	0.36			10.2133	0.658924
1.09	0.26			11.7508	1.86695
0.8	0.69			7.13835	3.07498
0.71	0.24			11.7508	2.30624
0.23	0.5		mean	10.2133	1.97677
0.36	0.12		SD	2.17434	1.01051
0.21	0.3
0.16	0.61
0.56	0.4
0.38	0.17
0.5	0.66
0.16	0.59
0.1	0.4
0.3	0.71
0.49	0.36
0.19	2.55
1.27	0.54
1.13	0.49
0.71	0.31
0.35	0.4
0.3	1.82
0.12	0.99
1.08	0.1
0.47	0.17
0.1	0.24
0.21	0.16
0.5	0.21
0.16	0.1
2.38	0.47
0.43	0.1
0.24	0.16
0.66	0.45
0.59	1.67
0.63	0.14
0.71	1.46
0.12	0.23
0.43	0.57
0.16	0.26
0.49	0.12
0.4	0.47
0.87	0.24
0.17	0.1
0.59	0.3
0.3	0.35
0.43	0.17
1.35	0.21
0.63	0.38
0.3	0.14
0.9	0.1
0.94	0.17
0.56	0.12
0.76	0.5
1.18	0.3
1.22	0.33
0.3	0.35
1.22	0.26
0.76	0.23
0.23	0.23
0.3	0.66
1.15	0.12
0.33	0.17
0.61	0.12
0.45	0.14
0.36	0.21
0.42	0.1
0.42	0.16
1.18	0.35
0.63	0.28
0.73	0.12
0.59	0.1
2.15	0.12
1.09	0.26
1.3	0.24
1.35	0.76
0.52	0.14
0.68	0.19
1.23	0.1
1.39	0.47
1.23	0.36
0.68	0.1
0.59	0.16
1.42	0.1
0.63	0.24
0.54	0.24
0.8	0.36
0.35	0.28
2.64	0.1
1.35	0.31
0.12	0.19
0.76	0.42
0.1	0.23
0.3	0.28
0.35	0.16
0.14	0.19
0.78	0.1
0.85	0.19
0.36	0.14
0.56	0.21
0.14	0.36
0.19	0.26
1.27	0.69
1.04	0.35
0.16	0.42
0.42	0.19
0.94	0.1
0.35	0.14
1.02	0.87
0.3	0.36
0.49	0.12
0.23	0.23
0.21	0.4
0.1	5.52
1.41	0.17
0.57	0.16
1.56	0.1
0.4	0.12
0.96	0.78
0.43	5.05
0.52	0.26
1.13	0.1
0.28	0.17
0.19	0.49
0.73	0.63
0.68	0.3
1.41	0.19
0.14	0.26
2.17	1.51
0.92	0.16
0.3	0.8
0.36	0.23
0.3	0.75
0.42	0.26
0.85	0.16
1.72	0.1
0.35	0.17
1.95	0.36
0.26	0.1
1.39	0.1
1.18	0.35
0.14	0.47
0.21	2.15
0.54	1.22
1.49	0.14
0.69	0.16
0.24
0.36
0.26
0.35
0.33
0.1
2.38
1.18
0.19
0.64
0.75
1.2
0.52
0.42
0.31
0.99
0.16
0.73
0.52
1.74
0.83
0.3
0.28
0.1
1.88
0.24
0.85
0.99
0.92
0.5
0.97
0.38
0.43
0.64
0.83
0.31
1.77
0.21
0.42
1.18
1.06
1.02
0.69
0.99
1.62
0.9
0.47
1.88
0.33
1.39
0.3
0.56
0.99
1.58
2.07
0.14
0.16
0.57
0.99
0.45
0.78
2.01
0.66
0.3
0.12
0.56
1.86
1.81
1.29
0.38
0.76
0.54
0.59
1.37
0.45
0.3
0.52
0.85
0.97
2.34
0.66
0.1
0.73
0.33
0.59
0.9
0.63
0.4
0.87
0.83
0.12
0.61
0.57
0.94
1.46
0.94
1.51
0.3
0.33
0.31
1.82
0.14
0.76
0.35
1.82
1.08
0.1
0.96
1.42
1.02
0.17
0.17
1.58
0.63
0.5
0.82
0.49
0.56
1.42
1.04
0.23
0.47
0.12
0.1
0.9
0.69
0.38
1.34
1.39
0.59
0.45
0.99
1.04
1.15
0.23
0.19
1.22
0.89
0.49
0.12
0.56
1.41
0.24
0.1
0.26
1.25
0.19
0.23
0.73
0.57
1.53
0.28
0.17
0.33
0.94
0.43
0.21
0.45
0.26
0.12
1.65
0.76
2.74
0.17
1.56
2.19
0.35
0.59
0.31
0.49
0.17
1.35
1.08
0.66
0.28
0.59
0.63
0.68
0.33
0.43
0.14
1.3
0.97
0.57
1.01
0.63
0.16
0.38
0.43
1.16
1.15
1.25
0.16
1.3
0.9
0.83
1.91
0.33
0.87
0.66
0.35
0.23
0.54
0.61
0.21
0.69
0.28
1.04
0.85
0.56
0.38
1.53
1.74
0.92
1.89
0.56
1.15
0.45
0.82
0.38
0.33
0.78
0.63
1.44
0.45
0.68
1.02
0.12
1.16
0.3
0.59
0.75
1.01
0.1
1.53
0.35
0.76
1.04
0.21
0.75
0.26
0.68
0.85
0.38
0.36
0.61
0.5
0.85
0.64
0.12
0.56
0.64
0.97
0.26
0.3
0.64
1.77
1.06
1.29
2.99
1.51
2.41
1.56
2.17
0.1
0.83
1.34
2.74
0.35
2.4
0.54
3.28
1.27
0.21
3.27
1.44
0.94
0.83
0.3
4.39
1.51
0.5
2.38
1.41
0.24
1.27
1.25
0.94
0.33
0.57
0.78
0.19
1.18
0.16
2.17
3.32
1.53
0.16
0.57
2.34
2.92
0.64
2.5
0.49
0.16
4.38
0.47
0.1
0.33
0.87
0.21
0.76
0.83
1.88
0.89
1.75
1.63
0.99
1.74
1.18
0.3
4.67
2.5
2.81
0.42
0.54
0.85
1.35
2.43
1.3
2.83
0.5
1.89
0.23
1.65
2.78
0.89
0.47
2.45
1.49
0.99
2.69
1.7
2.69
3.21
1.95
0.49
1.44
0.33
0.78
0.43
2.62
1.95
1.09
3.66
0.28
2.85
1.95
0.1
1.41
1.01
0.85
2.03
0.16
2
3.94
0.82
0.28
1.89
0.14
1.86
0.97
5.33
0.19
2.57
2.43
0.24
0.4
1.75
1.63
0.97
1.68
2.57
0.92
0.76
3.66
3.16
0.26
1.55
1.82
1.16
1.95
0.63
0.82
4.03
1.74
1.62
1.46
0.45
0.66
1.16
0.19
0.73
1.32
0.52
2.21
2.19
1.82
1.35
0.12
0.49
0.9
1.62
0.47
1.09
1.06
2.61
0.69
1.42
1.3
4.69
0.16
0.63
0.3
3.61
3.63
0.73
1.77
5.59
1.67
1.16
0.69
3.84
0.3
3.73
0.94
2.57
2.19
1.01
0.69
0.87
1.82
5.21
0.12
1.62
0.26
1.39
1.44
1.77
4.76
0.71
3.16
1.39
2.78
0.5
0.31
0.69
0.57
3.32
0.21
2.36
1.29
1.13
1.32
0.5
1.22
2.22
0.28
2.73
0.26
0.14
1.67
0.89
0.3
2.47
3.39
2.99
1.44
3.23
4.71
2.34
2.01
4.34
4.08
4.13
2.48
0.24
3.09
1.81
2.55
0.89
2.38
1.48
2.31
0.78
0.56
1.68
0.64
2.66
0.19
0.21
1.22
1.63
1.49
2.57
3.02
0.1
1.62
0.26
1.56
3.63
1.08
1.34
0.38
2.36
1.93
0.47
1.77
1.13
2.34
2.97
0.83
2.28
0.82
4.64
5.4
2.67
0.97
0.12
0.9
0.75
0.89
2.22
0.61
1.16
0.76
1.41
0.63
2.29
1.48
2.81
5
2.24
1.34
3.11
1.72
2.34
1.25
4.46
2.48
0.33
1.34
1.82
1.35
3.35
2.5
1.01
0.4
0.12
4.32
1.35
0.73
1.41
1.98
1.13
1.18
0.97
3.51
1.32
1.32
0.69
0.35
1.09
3.82
0.57
1.15
1.37
2.14
2.59
0.45
1.62
3.72
1.06
0.47
2.81
0.71
1.23
2.48
2.22
1.63
2.05
0.16
0.52
0.9
0.35
1.37
2.55
1.13
0.89
0.35
