# Supplementary material for: Rational optimization of a transcription factor activation domain inhibitor
Source: Nat Struct Mol Biol. 2023 Dec 4;30(12):1958–69. doi: 10.1038/s41594-023-01159-5 (PMC10716049; doi:10.1038/s41594-023-01159-5)
Supplement: Supplementary file 16 — Statistical source data. [file 41594_2023_1159_MOESM16_ESM.xlsx]

## Sheet: F4D
NMR
	EPI001, ref DMSO				CAM1, ref DMSO
	dH	dN	CSP		dH	dN	CSP
330
331
332
333
334
335
336	0.00177	-0.00517	0.00204989		-0.00088	-0.00854	0.00192137
337	0.00083	-0.00122	0.000865122		0.00055	-0.00582	0.0012874
338	0.00072	0.00056	0.000728659		0.00059	-0.00224	0.000740813
339	0.00044	-0.00349	0.000825108		6e-05	-0.00816	0.0016331
340
341	0.01223	-0.00146	0.0122335		0.00874	0.0004	0.00874037
342
343	-0.00078	-0.00589	0.00141283		-0.00061	-0.01115	0.00231193
344	0.0003	-0.00097	0.000357262		-0.00099	-0.00898	0.00205078
345	0.00131	-0.00367	0.00150162		0.0003	-0.00706	0.00144352
346	-1e-05	-0.00612	0.00122404		-0.00027	-0.00901	0.00182212
347	0.00131	-0.00367	0.00150162		0.0003	-0.00706	0.00144352
348	-0.00784	-0.006	0.0079313		0.00355	-0.00117	0.0035577
349	0.01419	-0.00442	0.0142175		0.00656	-0.02094	0.00778286
350	0.00094	-0.00334	0.00115318		0.00086	-0.00362	0.00112418
351	0.00052	-0.0023	0.000694262		0.00051	-0.00304	0.000793577
352	0.00045	-0.0033	0.000798812		7e-05	-0.00527	0.00105632
353	0.00011	-0.00322	0.000653327		0.00055	-0.00443	0.00104283
354	0.00036	-0.00353	0.000792487		0.00047	-0.00657	0.00139553
355	0.00031	-0.00151	0.000432786		0.00028	-0.00211	0.000506442
356	0.00029	-0.00593	0.00122094		-0.00031	-0.01011	0.00204563
357	0.00022	-0.00547	0.0011159		-0.00034	-0.00854	0.00174151
358	0.00029	-0.00808	0.00164182		0.00105	-0.0143	0.00304665
359	0.00513	-0.0184	0.00631342		-0.00551	-0.01614	0.00638593
360	-0.00315	0.0036	0.00323124		0.00506	0.00433	0.00513357
361	0.00193	-0.00257	0.00199727		0.0023	-0.0057	0.00256702
362	0.00068	-0.00318	0.000931072		0.00081	-0.00561	0.00138383
363	0.00124	0.00122	0.00126378		0.00162	-0.00086	0.00162911
364	0.00104	-0.00855	0.00200142		0.00203	-0.01011	0.0028652
365	0.00142	-0.00499	0.00173563		0.00115	-0.00629	0.00170443
366
367	-0.00038	-0.00408	0.000900142		-0.00232	-0.00849	0.002875
368	0.00037	-0.0045	0.000973088		0.00037	-0.01485	0.00299296
369	-0.00086	-0.01107	0.00237516		-0.00166	-0.01498	0.00342515
370	0.0008	-0.0051	0.0012963		-0.00016	-0.01241	0.00248715
371	0.00011	-0.00353	0.000714518		-0.00012	-0.00882	0.00176808
372
373
374
375
376
377
378
379
380
381
382
383	-0.00755	-0.00064	0.00755108		-0.00441	-0.00493	0.00451888
384	0.00129	0.00949	0.00229489		0.0015	-0.00201	0.00155293
385	0.00087	-0.00387	0.00116446		0.00061	-0.01079	0.00224256
386	-6e-05	0.00018	6.99714e-05		0.00052	-0.00348	0.000868801
387
388	0.00209	-0.00201	0.00212831		0.00318	-0.0028	0.00322893
389	-0.00167	-0.00097	0.00168123		0.00091	-0.00598	0.00150284
390
391	0.00021	-0.00224	0.000494777		-0.00041	-0.00668	0.0013975
392	-0.00033	-0.00888	0.0018064		4e-05	-0.01254	0.00250832
393	0.0004	0.00052	0.000413299		0.00115	0.0004	0.00115278
394	0.00131	-0.00966	0.00233425		0.00233	-0.02125	0.00484679
395
396	-0.01575	0.00127	0.015752		-0.00497	0.008	0.0052212
397	0.00193	-0.005	0.00217368		0.00274	-0.00676	0.00305541
398	0.00073	-0.01271	0.00264474		0.00101	-0.02385	0.00487576
399	-0.00133	-0.00786	0.00205915		-0.00171	-0.01072	0.00274241
400	0.00184	-0.00644	0.00224601		0.0016	-0.01394	0.00321449
401	-0.00015	-0.00596	0.0012014		0.00034	-0.00829	0.0016925
402	0.00142	-0.00499	0.00173563		0.00115	-0.00629	0.00170443
403	-0.00167	-0.01194	0.00291401		-0.00239	-0.01692	0.00414289
404	0.00464	-0.00517	0.00475381		0.00284	-0.01503	0.00413541
405
406	0.00048	-0.00305	0.000776209		0.00111	-0.00754	0.00187247
407	0.00508	-0.00627	0.00523249		0.00695	-0.00539	0.00703311
408	-0.00088	-0.00256	0.00101811		0.00087	-0.0047	0.00128082
409	0.00048	-0.00097	0.000517722		2e-05	-0.00042	8.63481e-05
410	0.00024	-0.00688	0.00139677		0.00064	-0.01055	0.00220493
411	0.00092	-4e-05	0.000920035		-0.00054	-0.008	0.00168867
412	-0.00091	-0.00672	0.00162309		-0.00175	-0.01102	0.00281427
413	-0.00085	-0.01286	0.00270882		0.00503	-0.00841	0.00530378
414
415	-0.00135	0.00427	0.00159744		0.0013	0.00463	0.00159608
416	0.00594	-0.00312	0.00597269		0.00415	-0.00826	0.00446672
417	0.00036	-0.00243	0.000604811		0.00022	-0.00442	0.000910964
418	-0.00037	-0.00442	0.000958309		-0.0007	-0.0045	0.00114017
419	0.00145	-0.00231	0.00152182		0.00139	-0.0049	0.00170074
420
421
422
423
424	0.00194	-0.00411	0.00210696		-0.00319	0.00212	0.00321806
425
426
427	0.00133	-0.00291	0.00145177		0.00061	-0.00549	0.00125607
428	-0.0002	-0.00283	0.000600297		0.00088	-0.00298	0.00106283
429	-0.0002	-0.00283	0.000600297		0.00088	-0.00298	0.00106283
430
431
432
433	0.00194	-0.00158	0.00196557		0.00285	-0.00315	0.0029188
434	-0.00076	0.00334	0.00101184		-4e-05	0.00117	0.000237394
435	0.00177	-0.00927	0.00256324		-0.00641	-0.0291	0.00865797
436	0.00016	-0.00415	0.000845281		-6e-05	-0.00755	0.00151119
437	0.00022	-0.00903	0.00181935		-0.00025	-0.01791	0.00359071
438	5e-05	-0.00569	0.0011391		0.00035	-0.01673	0.00336426
439	0.00133	-0.00291	0.00145177		0.00061	-0.00549	0.00125607
440	0.00082	-0.00314	0.00103285		0.00114	-0.00204	0.00121081
441	0.00061	-0.00185	0.000713442		0.00088	-0.00405	0.00119604
442	0.00115	-0.0027	0.00127047		0.0004	-0.00346	0.00079929
443	0.00049	-0.00246	0.00069438		0.00035	-0.004	0.000873212
444	0.00381	-0.0029	0.00385389		0.00943	-0.01323	0.00979419
445	0.00043	-0.00379	0.000871472		0.0002	-0.00788	0.00158864
446	0.00064	-0.00428	0.0010688		0.00022	-0.00988	0.00198821
447
448	0.00072	-0.00335	0.000983514		-0.00098	-0.00564	0.00149425

## Sheet: F4F
Contact probability
	EPI-002		1aa
Residue Number	Contact Probability EPI-002	error	Contact Probability 1AA	error
390	0.064	0.01	0.152	0.018
391	0.105	0.012	0.211	0.02
392	0.077	0.006	0.262	0.027
393	0.138	0.013	0.476	0.045
394	0.105	0.013	0.311	0.027
395	0.105	0.017	0.171	0.019
396	0.119	0.019	0.29	0.029
397	0.197	0.025	0.553	0.03
398	0.125	0.019	0.284	0.02
399	0.097	0.018	0.141	0.011
400	0.133	0.019	0.297	0.044
401	0.139	0.015	0.342	0.049
402	0.087	0.009	0.172	0.014
403	0.089	0.011	0.139	0.012
404	0.128	0.014	0.299	0.043
405	0.095	0.009	0.211	0.014
406	0.153	0.012	0.475	0.028
407	0.087	0.008	0.249	0.021
408	0.076	0.007	0.091	0.009
409	0.12	0.011	0.302	0.045
410	0.092	0.01	0.301	0.038
411	0.079	0.009	0.166	0.012
412	0.114	0.014	0.274	0.06
413	0.104	0.01	0.305	0.046
414	0.062	0.006	0.124	0.019
415	0.076	0.009	0.161	0.019
416	0.065	0.006	0.135	0.012
417	0.077	0.01	0.172	0.014
418	0.081	0.007	0.187	0.023
419	0.079	0.007	0.159	0.022
420	0.101	0.013	0.174	0.021
421	0.075	0.01	0.133	0.017
422	0.069	0.007	0.138	0.019
423	0.066	0.006	0.135	0.019
424	0.084	0.01	0.17	0.02
425	0.098	0.013	0.208	0.019
426	0.076	0.01	0.314	0.029
427	0.076	0.007	0.188	0.022
428	0.079	0.007	0.263	0.038
429	0.101	0.011	0.365	0.077
430	0.112	0.012	0.393	0.077
431	0.089	0.01	0.172	0.012
432	0.09	0.007	0.17	0.022
433	0.184	0.016	0.523	0.046
434	0.123	0.013	0.312	0.04
435	0.083	0.007	0.195	0.038
436	0.137	0.011	0.255	0.027
437	0.145	0.012	0.42	0.048
438	0.08	0.008	0.181	0.014
439	0.078	0.007	0.119	0.01
440	0.064	0.006	0.08	0.008
441	0.059	0.006	0.091	0.008
442	0.072	0.01	0.119	0.011
443	0.094	0.011	0.149	0.011
444	0.102	0.012	0.132	0.011
445	0.122	0.012	0.232	0.024
446	0.079	0.007	0.123	0.016
447	0.057	0.005	0.093	0.011

## Sheet: F4H
Compound	IC50	ChromLogD
1aa	5.08	3.59
1ab	1.07	4.07
1ac	3.7	3.38
1ad	4.9	3.79
1ae	1.54	4.96
1af	0.22	5.23
1ba	1.32	4.03
1bb	0.49	4.55

## Sheet: F4I
Figure 4I
Plasmid	[1ae] uM	% V7-induced V7BS3-luciferase activity (means of 3 technical replicates per independent experiment) n=5
ARV-7	0	83.68	112.93	103.39	145.87	81.56
ARV-7	0.1	74.37	107.97	109.56	133.81	110.71
ARV-7	1	132.8	84.232	111.76	104.68	128.62
ARV-7	2.5	95.29	88.32	85.399	78.86	56.85
ARV-7	5	24.24	26.033	17.742	46.81	62.55
ARV-7	10	0.324	0.2533	0.3835	10.94	25.65

## Sheet: F4J
Compounds on AR AD condensation in vitro
Tc (ºC)
	Tc repetition1	Tc repetition2	Tc repetition3	Tc mean	Tc SD
DMSO	37.3445	40.4113	36.9819	38.2459	1.53832
EPI-001	35.1757	35.6956	34.6732	35.1815	0.417443
1ae	31.5753	32.2421	31.7409	31.8528	0.283492

## Sheet: F4K
Compounds on AR AD condensation in vitro
Droplet size (um^2)
DMSO	EPI-001	1ae
2.21	0.2	0.38
0.32	0.76	0.41
0.84	0.49	0.17
1.1	0.59	1.68
0.61	1.09	0.6
1.6	0.15	1.01
1.41	0.7	0.72
1	0.75	1.21
0.61	1.47	0.57
0.37	0.62	0.48
1.22	0.73	0.84
0.14	0.52	0.2
1.62	0.89	0.2
1.79	0.36	0.41
1.4	0.58	1.11
1.2	0.61	0.18
0.75	0.24	0.16
1.06	0.19	1.31
0.31	0.21	0.17
1.54	0.16	0.45
1.03	0.1	0.89
0.44	1.16	0.7
2.2	0.36	0.7
0.34	0.39	0.82
1.2	0.39	0.33
0.28	0.23	0.84
0.16	0.81	0.71
1.28	0.59	0.38
1.05	0.63	0.77
0.81	0.81	0.2
1.61	0.38	0.99
1.16	0.22	1.39
0.71	0.24	0.31
1.03	0.7	0.18
0.78	0.45	0.45
0.7	0.29	0.16
1.36	1.24	0.28
0.25	0.84	0.63
0.17	0.61	0.2
0.62	0.31	0.29
0.75	0.3	0.12
0.8	0.93	1.08
1.59	0.36	0.45
1.55	0.87	0.2
0.12	0.23	0.3
0.47	0.38	0.52
1.41	0.12	0.12
0.35	0.25	0.18
1.65	0.7	1.34
0.45	0.48	0.86
0.94	1.02	1
0.21	0.29	0.58
1.12	0.1	0.25
1.14	0.3	1.04
1.1	0.92	0.45
0.36	0.3	0.17
0.1	1.28	0.36
0.23	0.57	0.45
0.59	0.44	0.29
1.23	0.21	0.5
2.32	0.89	0.1
0.5	0.44	0.49
1.2	0.23	0.52
1.63	0.57	0.7
0.99	0.67	0.64
0.65	0.68	0.39
1.02	0.3	0.28
1.34	0.75	0.23
0.9	0.58	0.18
1.41	0.57	0.18
0.6	0.44	1.15
0.79	0.52	0.53
0.25	0.1	0.19
0.3	0.52	0.73
0.31	0.27	0.52
2.81	1.04	0.24
0.52	0.6	0.25
1.8	0.51	0.54
0.32	0.95	0.75
1.58	0.28	1.12
0.52	0.72	0.66
0.39	1.29	0.17
0.65	0.79	0.79
0.36	0.46	0.7
1.55	0.86	0.7
0.25	0.26	0.96
1.18	0.17	0.54
0.45	0.18	0.87
0.68	0.26	0.17
0.43	0.43	1.35
0.39	0.54	0.44
0.36	0.69	0.77
0.46	0.24	0.87
1.15	1.16	0.45
0.34	0.37	0.65
2.26	0.73	0.38
1.34	0.5	0.43
0.65	1.32	0.66
0.47	0.94	0.52
1.18	0.5	0.3
0.3	0.56	0.44
0.78	0.86	0.71
2.68	0.64	0.33
0.62	0.49	1.24
1.46	0.35	0.29
0.82	1.87	0.53
0.44	0.76	0.41
0.3	0.49	1.35
0.88	0.5	0.17
0.42	0.42	0.19
0.55	0.25	0.39
2.18	1.02	1.38
0.71	0.36	1.39
1.69	0.74	1.2
0.68	0.33	1.34
0.68	0.26	0.13
0.48	0.97	0.44
1.15	0.56	0.13
0.78	0.25	0.9
0.38	0.75	0.24
1.44	0.15	0.97
0.89	0.81	0.78
2.6	0.36	0.4
1.55	0.54	0.56
1.22	0.19	0.87
0.76	0.9	0.23
1.15	0.19	0.2
1.3	0.24	0.38
0.17	1.02	1.2
0.45	0.55	1.05
0.6	0.61	0.36
0.36	0.28	0.15
1.92	0.34	0.71
0.78	0.33	0.64
1.56	0.35	0.54
1.88	0.8	0.22
1.88	0.68	0.63
0.25	0.23	0.49
1.29	0.6	0.14
0.65	0.92	0.12
1.4	0.97	0.35
1.67	0.91	1
0.12	0.23	0.98
0.47	0.57	0.15
1.35	0.73	1.06
0.76	0.72	0.27
0.63	0.46	0.39
0.29	0.54	0.62
0.35	0.97	0.91
1.63	0.87	1
0.59	0.78	0.58
0.72	0.73	0.73
0.53	0.79	1.48
0.22	0.3	0.8
0.23	0.23	0.38
1.32	0.58	0.95
0.62	0.24	0.91
0.35	0.51	0.41
0.35	0.37	0.41
0.49	1.28	0.49
0.23	0.62	0.77
0.74	0.39	0.12
0.68	0.23	0.85
0.68	0.78	0.26
0.61	0.18	0.17
1.23	0.22	0.8
1.88	0.33	2.24
0.59	0.23	0.17
1.02	0.69	0.69
0.97	0.61	0.1
0.28	0.91	0.39
0.16	0.75	1.18
0.98	0.38	0.53
1.02	0.23	0.54
0.81	0.6	0.9
0.88	0.36	1.64
0.97	1.69	0.49
0.94	0.57	0.38
1.86	0.21	0.7
1.23	0.24	0.23
0.9	0.86	0.2
0.63	0.44	0.27
1.24	0.46	0.3
0.47	0.13	0.25
0.84	0.33	1.23
2.71	0.42	1.25
1.21	0.46	0.7
0.23	0.35	0.38
0.88	0.15	0.77
0.7	0.28	0.85
0.48	0.46	1.11
1.31	0.12	0.99
0.9	0.2	0.36
0.33	0.4	0.32
0.3	1.01	0.56
0.89	0.55	0.74
0.46	0.86	1.53
1.05	0.65	1.1
0.68	0.38	0.86
0.37	0.27	0.29
0.98	0.25	0.28
0.29	0.86	0.46
1.87	0.17	0.31
0.92	0.54	0.59
0.91	0.15	0.49
1.31	0.14	0.89
0.89	0.76	1.6
0.99	0.54	0.34
0.25	1.07	0.61
0.54	0.12	1.28
1.3	0.25	0.73
1.2	1.59	0.97
2.15	0.49	1.27
0.76	0.44	0.66
1.93	0.37	0.41
1.21	0.62	1.14
1.15	0.1	0.84
0.52	0.34	0.37
0.47	1.01	2.72
0.57	0.59	1.35
1.12	0.39	0.1
1.02	0.28	0.6
1.25	0.17	2.76
1.58	0.52	0.2
0.57	0.35	0.91
0.14	0.47	0.12
0.59	0.44	0.41
1.72	0.18	0.2
0.74	0.1	0.85
0.35	1.3	1.42
1.17	0.2	0.18
0.37	1.52	0.47
0.39	1.16	0.6
0.11	0.2	1.15
0.59	0.15	0.64
0.35	0.11	0.69
0.34	0.96	1.9
1.38	0.61	0.47
0.23	0.38	0.49
1.34	0.52	0.34
1.38	1.16	0.2
0.65	0.49	0.14
0.47	0.23	1.09
0.76	0.31	0.1
0.87	0.71	1.9
0.72	0.16	0.75
0.15	0.35	1
2.35	0.27	1.01
1.32	0.34	0.79
0.89	0.71	0.68
0.15	0.23	0.33
0.99	0.65	0.53
0.62	0.3	0.66
1.19	0.59	0.48
1.08	0.43	1.68
0.68	0.66	0.65
0.21	0.22	0.11
1.08	0.92	0.68
1	0.37	0.86
1.05	0.41	0.89
0.89	0.91	0.51
0.73	0.57	0.47
0.38	0.23	0.89
1.34	0.24	0.57
1.42	1.3	2.11
1.15	0.52	0.36
0.24	0.28	0.49
0.34	0.18	0.49
0.54	1.26	0.71
1.93	0.8	1.44
1.2	0.39	0.41
0.36	0.66	0.26
1.55	0.32	1.05
1.22	0.79	0.12
0.6	0.7	1.63
1.56	0.75	0.25
0.51	0.77	0.54
1.78	0.2	0.2
0.43	0.3	0.95
1.64	0.1	1.05
0.86	0.69	0.65
0.81	1.36	1.38
1.01	0.36	0.93
0.99	0.31	0.46
0.47	0.53	0.93
0.42	0.18	0.13
0.84	0.78	0.57
0.91	1.04	1.33
1.61	0.95	1.26
0.7	0.28	0.81
0.81	0.34	0.53
1.63	0.68	0.87
0.72	0.59	0.6
0.75	0.27	2.4
0.62	0.4	0.41
0.83	0.49	0.34
2.18	0.85	0.74
0.22	0.45	0.12
0.29	0.62	0.28
0.68	0.73	0.51
0.25	0.16	0.58
0.91	0.66	0.17
1.97	0.26	0.68
0.28	0.12	0.4
0.24	1.03	0.85
1.08	1.44	0.54
1.23	0.87	0.32
0.51	0.3	1.2
1.73	0.25	0.21
0.4	0.46	0.28
0.32	0.16	0.26
2.16	0.36	0.49
1.92	0.97	1.2
0.98	0.78	0.83
0.46	0.66	0.29
0.81	0.79	0.57
0.58	1.08	1.42
1.18	0.1	0.73
0.7	0.49	0.81
0.87	0.63	0.34
0.78	0.1	1.1
1.1	1.11	0.12
0.73	0.25	0.98
0.33	0.28	0.53
0.2	1.26	0.72
0.91	0.56	0.59
0.75	0.63	1.51
0.36	1.2	0.8
0.89	0.87	0.78
1.77	1.01	1.91
1.02	0.65	0.9
0.3	0.44	0.12
1.27	0.38	0.62
0.7	0.82	0.35
2.51	0.74	0.12
0.18	0.23	0.45
1.02	0.3	0.2
1.16	0.37	1.76
1.9	0.57	0.62
1.1	0.7	1.15
1.14	0.73	1.31
1.34	0.54	0.84
0.81	0.96	0.49
0.19	0.57	1.28
0.54	0.12	0.71
0.29	0.3	0.87
0.14	0.86	0.3
1.55	0.56	0.58
0.98	1.03	0.2
0.3	0.49	0.2
0.39	0.23	0.43
1.01	0.91	0.29
1.62	1.29	3.41
0.86	0.67	0.6
2.21	0.61	0.2
1.28	0.61	1.48
0.13	0.23	0.48
1.13	0.54	1.23
0.65	0.31	0.37
0.15	0.23	0.49
0.15	0.25	0.38
0.44	0.31	0.43
1.95	0.23	1.08
1.54	0.99	0.54
2.29	0.35	0.94
0.53	0.94	1.28
1.11	1.38	0.71
2.1	0.44	0.49
0.38	1.44	0.14
1.24	0.61	1.91
0.99	0.59	0.44
0.46	0.62	0.21
0.49	0.14	0.84
0.9	0.44	0.33
0.55	1.13	0.57
0.71	0.17	1.18
0.31	0.15	0.71
0.62	1.31	1.89
0.12	0.44	1.24
0.86	0.6	0.9
1.92	0.24	0.49
0.73	0.3	0.32
0.86	0.65	1.31
2.63	0.4	1.12
0.23	1.02	0.41
0.28	0.2	1.07
0.85	1.02	0.23
0.44	1.2	0.43
0.48	0.77	0.35
0.23	0.52	2.62
0.3	0.65	0.69
0.22	1.52	0.94
0.67	0.85	1.56
0.42	0.6	0.29
0.79	0.89	1.53
1.63	0.3	1.13
0.33	0.55	0.5
0.71	0.78	0.97
0.38	0.94	0.41
0.4	0.93	1.31
0.33	1.13	0.42
0.9	1.18	0.23
0.3	0.36	0.56
1	0.58	0.94
1.18	0.91	0.56
0.86	0.37	0.2
0.24	0.7	0.1
0.52	0.35	0.12
0.31	1.09	0.97
0.3	0.33	0.85
0.23	1.2	0.68
0.97	0.76	1.63
0.23	0.62	0.81
0.93	0.26	0.5
1.24	1.32	2.51
1.2	0.72	0.73
0.37	0.73	0.44
0.47	1.1	1.63
0.78	0.2	0.54
0.33	0.55	0.2
0.66	0.77	0.45
0.52	0.48	0.99
0.88	0.12	0.41
0.28	0.26	0.71
1.58	0.33	1.82
0.74	0.57	1.26
1.11	0.41	0.22
0.28	0.97	0.64
1.74	1.24	0.78
0.73	0.62	0.69
0.77	0.1	1.58
0.63	0.1	1.11
1.63	0.25	0.25
0.21	0.73	0.62
0.54	0.4	0.22
0.64	0.38	0.76
1.19	0.41	0.5
1.23	0.53	0.15
1.72	0.52	0.19
0.62	0.41	0.34
0.86	0.13	0.97
1.98	0.68	0.78
0.19	0.52	1.3
1.86	0.87	0.48
1.27	0.32	1.36
0.48	0.42	1.28
1.14	0.54	0.32
1.4	0.36	1.42
0.31	0.1	0.1
0.25	1.18	0.75
0.52	0.12	0.38
0.91	0.34	0.16
0.26	0.97	0.26
1.52	0.79	0.23
0.49	0.5	0.89
0.61	1.37	0.59
1.69	0.61	0.15
0.81	1.84	0.56
0.82	0.42	0.15
0.65	0.86	0.22
0.57	0.69	0.31
0.4	0.58	0.73
1.28	0.65	0.17
0.33	1.81	0.17
0.61	0.87	0.18
2	0.98	0.15
0.79	1.31	1.42
2.18	0.24	1.07
1.11	0.49	1.84
0.11	0.62	0.68
1.15	1.23	0.18
0.75	0.27	0.4
0.73	0.59	0.15
0.22	0.45	0.44
0.23	0.98	0.6
0.41	0.73	0.74
0.48	0.58	0.73
1.27	0.87	0.49
0.56	0.75	1.3
0.45	1.14	0.14
0.37	0.39	0.88
0.72	0.46	0.38
0.26	0.18	0.52
0.17	0.62	0.23
0.38	0.12	0.1
0.79	0.24	0.23
2.13	0.21	1.99
1.76	1.03	0.34
1.71	0.22	0.4
1.2	0.3	1.88
1.17	0.37	0.3
0.41	0.25	0.18
0.92	2.4	0.77
1.31	0.89	1.5
0.72	0.5	0.25
2.33	0.12	0.41
1.47	0.39	1.55
0.44	0.29	0.42
0.33	0.18	1.01
0.44	0.68	1.81
0.69	0.18	0.29
0.6	0.84	0.49
0.66	1.07	1.14
0.33	0.15	0.57
1.46	0.55	0.45
1.34	0.24	0.82
0.57	0.27	1.43
0.94	0.12	0.34
1.56	0.91	0.36
0.19	0.68	1.23
0.54	0.57	0.13
0.65	0.78	0.2
0.6	0.37	0.24
0.74	1.27	0.36
1.09	0.81	1.04
0.19	0.93	0.27
1.19	0.96	0.52
1.15	1.32	0.23
0.33	0.5	0.12
0.63	1.95	0.79
0.63	0.91	0.26
0.83	0.98	0.16
0.96	0.4	0.15
0.36	0.12	0.71
0.94	0.77	0.87
1.99	0.4	0.46
0.78	0.15	2.85
0.51	0.75	0.24
0.86	0.51	0.43
0.79	0.54	0.49
0.73	0.51	0.44
0.27	0.1	1.31
0.2	0.58	3.03
0.13	0.48	1.7
0.33	0.68	0.47
0.41	0.16	0.41
0.7	1.13	1.5
0.53	0.58	0.27
0.27	0.84	0.78
0.87	0.37	2.61
1.18	0.16	1.04
0.15	0.49	0.21
0.97	1.39	1.77
1.26	0.53	0.38
1.75	1.09	0.58
0.31	0.6	0.25
0.3	1.34	0.34
0.33	0.62	0.32
0.53	0.54	0.17
0.44	0.68	0.44
0.9	0.92	0.4
1.39	1.71	0.28
0.84	0.13	1.68
1.74	1.13	0.17
0.17	0.4	0.45
1.02	1.1	0.89
0.65	0.36	0.11
0.21	0.39	0.23
0.78	0.33	1.76
0.37	0.67	0.92
0.6	0.89	0.28
1.07	0.83	1.44
0.59	0.65	0.33
0.83	2.81	0.1
0.69	1.26	0.33
0.89	0.16	0.69
1.03	0.25	1.06
0.33	0.67	0.44
1.2	0.37	0.74
1.1	0.72	0.78
1.03	0.97	0.6
0.78	1.47	0.77
0.13	0.28	2.39
0.49	1.47	0.38
1.17	0.54	0.23
1.39	0.14	0.11
0.28	0.71	0.36
0.99	0.3	0.75
0.52	0.81	0.13
0.11	1.51	0.62
0.64	0.28	0.13
0.29	0.19	0.68
0.37	0.42	0.56
0.74	1.17	0.52
0.68	1.52	2.33
0.34	0.68	0.19
0.5	0.7	1.48
0.36	0.81	0.48
1.18	0.33	0.14
0.89	1.14	0.37
0.3	0.18	1.11
0.12	0.68	0.54
1.02	0.32	0.94
0.86	0.1	1.25
1.34	0.62	0.39
0.26	0.44	1.81
1.02	0.84	0.44
1.07	0.58	0.52
0.46	0.7	0.22
0.57	0.76	0.95
0.94	0.32	1.81
0.55	0.46	1.07
0.12	1.15	1.23
0.95	1	0.14
0.66	0.97	0.57
0.36	0.25	0.72
0.9	1.25	0.32
1.07	0.73	1.02
0.28	0.15	1.34
0.52	0.83	0.47
0.72	0.66	1.63
0.98	0.52	1.25
0.15	0.57	1.42
0.26	0.4	3.53
1.62	0.66	0.23
0.57	0.75	1.71
1.3	0.6	0.42
1.49	0.6	0.47
0.58	0.49	0.9
0.75	0.75	2.06
0.93	0.52	2.41
1.26	1.09	1.52
0.63	0.46	0.3
0.62	0.7	0.11
0.16	0.2	0.12
0.11	0.51	1.47
0.17	0.33	0.1
0.38	0.78	0.11
0.31	0.17	0.34
0.17	0.91	0.28
1.68	0.28	0.74
0.75	0.75	0.65
0.35	0.2	0.4
0.27	1.02	0.62
0.23	0.42	3.8
0.13	0.2	0.49
0.19	0.23	1.05
0.3	0.25	0.19
0.73	0.92	0.55
0.6	0.12	0.75
0.82	1.4	1
0.35	0.65	0.62
1.39	0.4	0.49
0.44	0.15	2.07
0.74	1.36	0.97
0.42	0.1	0.54
0.71	0.41	0.75
0.2	0.38	0.26
0.13	0.47	0.5
0.16	0.77	1.2
0.33	0.36	3.54
0.31	0.73	1.52
0.7	0.39	0.38
0.22	0.34	1.46
0.18	0.56	1.23
0.28	1.07	0.19
0.3	1.42	0.61
0.18	0.7	0.69
0.61	0.49	0.81
0.41	0.81	0.15
0.38	0.28	0.23
0.43	0.23	0.49
0.65	0.25	0.23
0.77	0.25	0.65
0.22	1.23	0.88
0.54	0.93	0.14
0.27	0.89	2.61
0.6	0.28	0.28
0.97	0.78	1.44
0.17	0.81	0.2
0.58	1.05	0.47
0.25	0.2	0.78
0.57	0.73	3.47
0.79	1.26	0.54
0.28	0.28	0.11
0.23	0.43	0.38
0.75	0.2	0.5
0.27	0.44	0.56
0.14	0.15	2
0.36	0.46	0.3
0.59	0.44	0.1
0.68	0.55	0.1
0.51	1.6	1.56
0.3	0.3	0.16
0.23	1.28	0.2
0.12	0.41	0.28
0.1	0.55	1.75
0.1	0.7	0.11
0.53	0.71	1.07
0.81	0.75	0.25
0.33	0.74	0.51
0.2	0.37	3.87
0.46	0.12	1.66
0.18	0.41	0.74
0.12	0.57	0.52
0.3	0.91	0.77
0.36	0.24	1.11
0.2	0.68	0.58
0.33	0.46	0.7
0.2	0.38	0.41
0.61	0.69	0.28
0.54	0.73	0.57
0.75	0.86	0.2
0.38	0.27	0.26
0.15	1.13	0.11
0.64	0.3	1.6
0.58	0.69	1.84
0.69	1.16	0.6
0.58	0.4	0.11
0.49	0.51	0.6
0.8	0.57	0.25
0.31	0.94	0.11
0.11	0.44	0.13
0.35	0.34	0.68
1.18	1.13	0.78
0.39	0.14	0.16
0.36	0.18	0.29
0.78	0.7	0.24
0.46	1.15	2.69
0.3	0.24	1.38
0.2	0.78	1.89
0.73	1.41	0.26
0.68	0.62	0.67
0.38	0.15	0.1
0.3	0.75	1.38
0.77	0.29	1.13
0.94	0.1	2.24
0.1	1.76	1.27
0.49	0.53	1.2
0.16	0.68	0.6
0.18	0.83	0.97
0.5	0.68	2.5
0.89	0.28	0.49
0.49	0.57	0.11
0.43	0.57	0.25
1.27	1.01	0.94
0.33	0.2	3.22
0.32	0.7	0.44
0.52	0.39	0.44
0.73	0.13	0.12
0.52	0.78	0.77
0.36	0.68	0.23
1.04	0.36	0.89
0.57	0.12	0.17
0.38	0.17	0.83
0.64	1.27	0.36
0.41	1.29	0.9
0.31	0.36	2.25
0.34	0.32	0.65
0.58	0.33	0.6
0.78	0.39	0.52
0.38	1.04	1.1
0.64	0.33	1.07
0.15	0.83	2.93
0.44	0.25	0.23
0.76	0.65	0.63
0.16	1.03	0.62
0.32	0.53	0.95
1.49	0.3	0.94
0.7	0.1	0.2
0.16	0.31	0.12
0.21	1.37	0.22
0.79	1.22	0.86
0.33	0.22	2.42
0.19	0.23	0.59
0.32	0.41	0.25
0.45	1.38	1.05
0.16	0.11	1.62
0.78	0.14	0.17
0.51	0.65	0.42
0.44	0.58	0.18
0.78	0.5	0.36
1.11	0.86	0.28
0.26	0.9	0.58
0.28	0.44	0.18
0.36	0.17	2.93
0.38	0.52	1.71
0.44	0.94	0.1
0.41	0.38	0.18
1.42	0.34	0.21
1.29	0.91	0.56
0.83	0.87	0.77
0.73	0.3	0.41
0.79	0.91	1.66
0.66	0.17	0.55
0.73	0.69	1.83
0.88	0.11	0.75
0.36	0.41	0.83
0.26	0.57	0.12
0.65	0.11	0.58
1.36	0.3	1.22
1.02	1.79	0.54
0.3	0.48	0.29
0.51	0.25	0.75
0.33	0.14	0.68
0.23	1.24	0.99
0.25	0.97	0.29
0.12	0.15	0.2
1.15	1.14	0.3
0.64	0.36	0.25
0.2	1.06	0.27
0.13	0.28	2.42
0.12	0.25	0.46
0.6	2.22	0.76
0.6	0.21	0.99
0.13	0.41	0.57
0.29	0.16	0.52
0.44	0.16	0.5
0.91	0.73	0.22
0.11	0.79	0.55
0.62	0.77	2.01
0.19	0.14	0.25
1.47	0.19	0.66
0.24	1.15	0.54
0.57	0.1	3.83
0.3	1.2	0.44
0.17	0.78	0.16
0.21	0.81	0.55
0.74	0.45	0.12
0.56	0.17	0.58
0.37	0.23	0.23
0.97	0.36	0.73
0.58	0.49	0.15
0.64	0.23	0.19
0.43	0.57	0.7
0.22	0.86	0.83
0.38	0.6	0.54
0.54	1.2	0.56
0.11	0.76	0.57
0.59	0.29	1.17
0.23	0.49	0.23
0.21	0.48	1.51
0.32	0.22	0.33
0.68	0.28	0.62
0.52	0.13	0.2
0.36	0.33	0.56
0.3	0.28	1
0.11	1.31	0.8
0.23	0.24	1.91
0.6	1.05	1.04
0.41	0.5	0.44
0.53	1.26	0.3
0.4	0.1	1.84
0.43	0.4	0.33
0.41	0.49	0.67
0.29	0.7	0.64
0.57	0.12	0.33
1.28	0.27	0.79
0.41	0.56	0.91
0.83	0.91	0.36
0.21	0.12	3.11
0.49	0.19	2.96
0.17	0.83	0.78
0.23	0.34	0.2
0.63	0.56	2.05
1.34	0.36	0.13
0.11	0.14	3.41
0.41	0.2	0.66
0.33	0.91	0.57
0.62	1.44	0.34
0.13	0.5	0.46
0.84	0.52	2.68
0.56	0.25	0.36
0.54	1.25	0.1
0.39	0.76	0.32
1.69	0.28	0.75
0.37	0.36	1.48
0.44	0.15	1.23
0.33	0.3	0.22
0.18	0.13	0.45
0.63	0.77	1.16
0.57	0.12	0.56
1.13	0.75	0.58
0.21	0.36	0.78
0.28	1.51	0.78
0.7	1.45	0.47
1	0.55	0.42
1.35	1.02	0.13
0.5	1.37	0.44
0.49	0.2	2.26
0.37	0.14	0.34
0.43	0.61	2.34
0.38	2.19	1.2
0.3	0.59	0.39
0.11	0.16	1.3
0.42	0.7	2.18
0.42	0.11	2.7
0.4	0.11	0.95
0.13	0.58	0.44
0.39	0.17	0.44
0.58	0.73	0.43
0.22	0.38	0.13
0.11	0.6	1.18
0.22	0.17	1.07
0.76	0.19	1.89
0.55	0.59	1
0.66	0.23	1.58
0.28	0.28	2.78
0.98	0.15	0.19
0.3	1.01	0.53
1.01	1.18	0.23
0.17	0.52	0.2
1.83	0.73	0.4
0.2	0.78	0.68
0.23	0.6	0.87
0.81	0.82	1.83
0.36	0.36	0.12
0.19	0.62	0.81
0.23	0.68	1.5
0.37	0.15	2.26
1.46	0.13	0.17
0.34	0.29	0.31
0.99	0.44	2.04
0.7	0.19	2.91
0.94	0.61	0.48
1.02	0.73	0.63
0.33	0.74	0.98
0.41	0.26	2.5
0.13	0.59	0.54
0.52	0.86	3.51
0.49	0.28	0.94
0.17	0.21	0.46
0.28	1	3.24
0.11	1.13	0.43
0.3	0.79	2.61
0.54	0.22	1.63
1.17	0.62	2
0.49	0.97	2.44
0.4	0.29	0.24
0.4	0.35	0.55
0.54	0.25	0.61
0.46	0.53	1.48
0.11	0.12	1.67
0.35	0.93	0.75
0.57	0.41	0.6
0.55	1.05	2.37
0.93	0.86	0.94
0.44	0.43	0.24
0.38	0.22	1.61
0.44	1.24	0.44
0.25	0.41	0.5
0.33	0.52	2.07
0.81	0.3	0.64
1.68	0.32	0.2
0.77	0.51	4.09
1.1	1.55	0.33
0.8	1.36	1.57
0.17	0.5	0.36
0.3	0.91	0.2
0.27	0.87	0.45
0.49	0.63	0.43
0.83	0.9	0.69
0.21	1.84	1.13
0.29	0.15	1.03
0.83	0.13	2.98
0.63	0.74	0.7
0.85	0.39	1.95
0.25	0.35	1.92
0.23	0.17	1.73
1.14	0.43	2.9
0.65	0.28	0.98
0.83	0.39	0.44
0.66	0.48	1.15
0.49	0.22	0.28
0.17	0.4	0.45
1.05	0.86	1.44
1.01	0.95	1.29
1.23	0.12	0.55
0.17	1.07	0.94
0.18	0.25	0.45
0.12	0.7	1.98
0.49	0.14	0.41
0.31	0.41	0.67
0.58	0.97	0.94
1.76	0.12	0.54
1.1	0.25	0.35
1.21	0.73	0.6
0.78	0.45	0.83
0.12	1.36	3.4
1.01	0.21	0.64
0.76	0.25	0.88
0.29	0.52	2.18
0.44	0.66	1.28
0.88	0.3	0.19
0.75	0.44	0.35
0.12	0.81	0.86
2.03	0.33	0.62
0.57	0.62	0.73
0.65	0.43	2.48
1.42	0.6	1.95
0.32	0.13	3.2
0.27	0.39	0.65
0.25	0.57	0.26
0.91	0.49	1.04
0.83	0.99	1.79
0.52	0.49	1.61
0.81	0.94	1.14
0.26	0.11	0.86
0.43	0.91	1.08
0.6	0.93	0.97
0.45	0.37	0.64
0.38	0.21	0.14
1.05	0.2	2.21
1.09	0.32	0.6
0.46	0.78	1.52
0.51	0.27	0.25
1.19	0.32	0.81
0.55	0.46	0.2
0.76	0.15	1.35
0.46	0.29	1.03
0.8	0.52	1.47
0.24	0.41	1.17
0.39	0.96	1.6
0.28	0.55	0.7
1.12	0.37	1.31
0.22	0.86	0.22
0.17	0.2	0.21
0.38	1.27	0.3
0.14	0.25	0.13
0.28	1.06	0.23
0.7	0.84	1.11
1.33	0.15	0.12
0.17	0.1	0.86
0.19	1.21	0.54
0.61	0.22	0.11
0.3	0.21	1.57
0.53	0.3	0.13
1.5	0.53	0.62
0.76	0.24	0.83
0.34	0.17	1.24
0.25	0.12	0.73
1.19	0.18	1.14
0.52	0.17	0.52
0.25	1	0.99
0.7	0.86	0.17
0.31	0.12	1.71
0.54	1.39	0.48
0.2	1.39	0.12
0.17	0.38	0.87
0.22	0.44	0.58
0.38	0.23	0.23
1.01	0.12	0.3
0.35	1.06	1.07
1.15	0.23	1.15
0.93	0.45	1.13
0.12	0.17	0.28
0.15	0.15	0.49
0.68	0.17	0.31
0.35	0.74	0.28
0.52	0.21	0.74
0.41	0.87	0.43
0.89	0.23	0.21
0.62	0.2	0.16
1.07	0.22	0.89
0.15	1.07	0.17
1.37	1.13	0.58
0.74	0.29	0.11
0.83	0.23	0.7
1.12	0.15	1.41
0.86	0.59	2.76
1.12	0.17	0.42
0.1	0.44	2.13
0.15	1	1.53
0.5	0.43	0.16
0.21	0.32	2
0.25	0.77	1.9
0.74	1.1	0.19
0.36	0.26	0.27
0.93	1.56	1.06
0.15	0.48	0.37
0.44	0.17	0.11
0.42	1.02	0.67
0.2	0.7	0.44
0.45	0.13	0.17
0.73	0.16	2.29
0.55	0.23	1.59
1.05	0.2	0.11
0.6	0.5	1.37
0.23	0.31	0.62
0.35	0.99	0.34
0.21	0.61	0.15
1.76	1.48	1.66
0.74	1.01	2.72
0.26	0.78	3.76
0.25	0.22	0.96
0.89	0.54	0.73
0.97	0.46	0.44
1.16	0.25	0.52
0.1	0.61	1.1
0.4	0.49	0.32
0.14	0.85	1.22
1.5	0.42	3.59
1.23	1.02	0.1
0.49	0.68	1.23
0.57	0.28	0.31
1.52	0.33	0.11
0.94	0.82	0.44
0.15	0.21	0.31
0.83	0.57	0.99
0.29	0.13	1.02
0.41	0.38	3.95
0.1	0.31	0.41
0.73	0.38	0.26
0.75	0.18	0.37
0.16	0.43	0.46
0.75	0.74	1.1
1.08	0.68	1.13
0.56	1.5	2.98
0.82	0.75	0.45
0.15	0.78	1.09
0.89	0.49	0.72
0.86	0.8	0.11
1.04	0.43	0.97
0.1	0.7	0.13
0.66	0.36	0.68
0.89	0.83	1.36
1.19	0.44	1.95
0.55	0.32	0.17
0.34	0.23	0.42
0.68	0.85	0.38
0.94	0.78	0.15
0.71	0.26	0.33
0.28	0.37	0.13
1.04	0.92	0.47
0.36	0.16	4.72
0.77	0.43	0.83
0.36	0.68	0.38
0.6	0.28	1.53
0.5	0.17	2.69
1.14	1.1	3.06
0.33	0.4	0.25
0.62	0.39	2.55
0.24	0.23	0.77
0.2	0.1	0.81
0.63	0.74	0.66
1.2	0.12	0.41
0.24	0.2	0.58
0.41	0.48	1.84
0.26	1.26	0.64
0.13	1.18	0.74
1.55	0.43	0.45
1.65	0.4	0.17
0.42	0.99	2.4
0.21	0.78	1.07
0.11	1.57	0.32
0.17	0.59	0.68
0.36	0.25	0.21
0.17	0.15	0.58
0.39	0.5	0.14
0.2	0.68	0.85
0.33	0.79	0.35
0.43	0.65	1.69
0.12	0.6	0.68
0.33	2.07	0.41
0.54	1.02	0.4
0.52	0.36	1.28
0.19	1.03	0.48
0.47	0.65	0.19
0.35	0.91	0.61
0.54	0.17	2.04
0.16	0.7	0.28
0.36	0.55	0.2
0.29	0.17	0.78
0.2	0.93	0.64
0.36	0.82	0.35
0.3	0.43	2
0.41	1.64	0.14
0.91	0.35	2.32
0.22	0.59	1.21
2.08	0.52	1.76
0.23	0.65	0.58
0.25	0.83	0.34
0.49	0.68	0.49
0.29	0.69	0.29
0.3	0.38	0.5
1.55	0.31	3.24
0.23	0.23	2.7
0.59	0.52	1.45
0.67	0.79	0.96
0.34	0.25	2.75
0.18	0.54	0.23
0.23	0.63	1.13
0.52	2.29	0.68
0.62	0.14	0.83
1.09	0.71	0.98
1.03	0.52	0.44
0.86	0.55	0.47
0.81	0.6	0.54
0.21	0.17	0.66
0.6	0.44	0.49
0.39	0.91	0.27
0.89	0.41	1.63
0.65	0.46	0.25
0.46	0.33	0.43
0.14	0.69	0.22
0.13	0.51	1.18
0.26	0.55	0.4
0.82	0.48	0.39
1.02	0.28	0.42
0.23	0.38	0.33
0.11	0.96	3.03
0.58	0.21	0.84
0.12	0.72	2.78
1.71	0.1	0.68
0.37	1.84	0.94
0.75	0.33	1.23
0.24	1.03	1.64
0.65	0.48	0.19
1.26	0.2	0.14
0.44	0.17	0.38
0.71	0.62	0.55
0.43	0.89	0.78
0.74	0.69	0.2
0.95	0.23	0.2
0.36	0.4	1.66
0.52	0.59	2.08
0.23	0.16	0.11
0.2	0.29	0.11
0.57	0.44	0.89
0.65	0.57	0.39
0.67	0.31	0.37
0.82	0.33	0.48
0.77	0.21	0.21
0.18	0.77	0.17
0.15	1.25	0.25
0.54	1.26	1
0.12	0.4	3.17
0.7	1.11	0.48
0.54	0.81	0.97
0.34	0.13	0.33
0.87	0.23	0.83
0.8	0.57	1.63
0.25	0.46	1.32
0.14	0.6	1.56
0.75	0.84	2.29
0.38	0.37	1.82
0.11	0.57	1.92
0.47	0.3	0.72
0.28	1.07	0.75
0.3	1.95	0.35
0.3	0.28	2.24
0.81	0.85	0.74
0.52	0.59	1.45
0.57	0.47	0.49
0.37	0.61	0.59
0.52	0.52	1.55
0.42	0.31	0.8
1.05	0.23	1.35
0.12	0.71	1.08
0.57	0.28	2.24
1.28	0.31	0.65
0.19	1.07	0.68
0.7	0.93	0.14
0.31	0.77	0.99
0.78	0.68	1.18
0.68	0.94	0.91
0.42	0.15	4.15
0.17	0.31	0.45
0.57	0.62	1.18
1.07	1.05	0.93
1.13	0.23	0.78
0.88	0.83	1.06
1.37	0.57	1.23
0.28	1.04	1.52
0.56	0.7	0.33
0.54	0.48	0.84
1.13	2.03	2.24
0.35	0.68	0.85
1.13	0.66	0.64
0.44	0.38	0.15
0.16	0.7	0.88
0.35	0.21	0.98
0.15	1.33	0.44
0.35	0.25	0.87
0.35	0.19	0.54
0.29	0.45	0.76
0.62	0.86	1.46
0.62	1.15	1.28
1.45	0.25	1.22
0.6	0.2	0.23
0.15	0.66	0.25
0.6	0.88	0.65
0.71	0.78	1.15
0.36	0.36	1.7
0.54	1.23	0.29
0.3	0.91	0.34
0.97	0.65	1.89
0.33	0.15	2.41
0.57	0.12	0.97
0.25	0.33	1.01
0.3	0.4	0.61
0.75	0.3	2.08
0.15	0.25	1.34
0.31	0.24	2.36
0.73	0.12	3.44
0.51	0.36	1.01
1.21	0.78	0.83
0.36	0.36	1.52
0.33	0.14	0.89
0.34	0.49	2.18
0.7	0.17	2
0.22	0.46	3.16
0.27	0.16	1.59
0.31	0.92	1.49
0.12	0.54	1.04
0.61	0.65	2.26
0.71	1.25	1.42
0.11	0.4	1.2
0.1	0.19	1.79
1.05	0.28	3.72
0.51	0.47	1.18
0.22	1.1	4.86
0.98	0.51	0.67
0.63	1.17	0.49
0.41	0.78	2.56
0.49	0.43	3.22
0.25	0.37	1.32
0.33	0.67	0.89
0.24	0.24	0.99
0.47	1.68	2.27
0.58	0.16	0.89
0.49	0.73	0.56
0.43	0.52	2.08
0.67	0.39	0.6
0.37	0.23	2.36
0.88	0.62	1.2
1.2	0.48	3.77
0.16	0.28	0.17
0.71	1.47	1.76
0.47	0.19	0.52
0.28	1.92	0.86
0.41	0.37	2.74
0.13	0.28	0.52
0.44	0.18	2.03
0.81	0.19	0.7
0.39	0.1	1.11
0.12	0.31	0.67
0.77	0.2	1.08
0.42	1.36	0.54
0.39	1.17	1.58
0.75	0.13	1.56
0.59	0.42	1.27
0.82	0.71	0.86
0.44	0.84	0.92
0.18	0.23	0.17
0.18	0.79	2.46
1.13	0.4	0.73
0.57	0.25	0.94
0.49	0.59	0.97
0.71	0.3	0.56
0.34	0.5	0.5
0.88	0.5	3.67
0.51	1.34	1.58
1.2	0.72	0.81
0.12	0.28	0.48
0.9	0.65	2
0.97	0.28	4.53
1.03	0.3	3.4
0.26	0.94	0.27
0.96	0.74	1.13
0.41	0.32	0.33
0.56	0.58	1.79
0.52	0.37	0.72
0.27	0.58	2.83
0.21	0.11	0.86
0.2	0.3	2.1
0.19	0.71	0.64
0.13	1.36	0.35
0.8	1.16	0.33
0.4	0.24	1.02
0.5	0.42	2.67
0.49	0.52	1.62
0.42	0.99	2.23
0.91	0.52	0.17
0.2	0.14	0.91
0.51	0.24	0.51
0.56	0.14	0.41
0.36	0.33	2.64
0.38	1.26	0.6
0.12	1.08	1.47
0.39	1.3	0.27
0.34	0.94	0.39
0.36	0.18	1.26
0.41	0.17	1.34
0.52	0.84	0.13
0.21	0.49	0.16
0.29	0.42	1.22
0.41	0.7	0.36
0.98	0.55	1.87
0.22	0.38	1.92
0.17	0.14	0.2
0.43	3.71	0.46
0.2	0.35	0.91
0.36	0.84	0.68
0.7	0.57	1.34
0.39	0.14	0.96
0.2	1.97	1.56
0.23	1	0.98
1.65	1.09	3.72
0.43	0.27	0.65
0.15	0.63	0.28
0.65	1.21	1.53
0.17	0.54	0.73
0.8	0.73	1.86
0.25	0.41	0.34
0.45	0.66	1.65
0.25	0.15	1.15
0.12	0.53	1.16
0.46	0.72	2.12
0.85	0.12	0.2
0.78	0.16	2.37
0.13	0.67	1.42
0.93	0.55	3.29
0.42	0.18	2.48
1.39	0.44	1.62
0.12	0.73	1.15
0.86	0.44	0.46
0.46	0.37	2.64
0.38	1.96	1.25
0.25	0.21	0.42
0.27	0.93	2.26
0.94	0.38	0.16
0.29	0.28	1.25
0.64	1.38	0.75
0.62	0.12	1.76
0.27	0.38	0.41
0.79	0.24	0.78
0.69	0.83	1.14
1.3	0.38	0.17
0.15	0.28	0.21
0.12	0.15	1.17
0.15	0.54	0.3
0.25	0.54	2.21
0.28	0.15	0.29
0.94	0.59	0.44
0.11	0.33	0.55
0.43	0.49	2.77
0.71	0.1	0.6
1.31	0.39	1.14
1.03	0.64	0.17
0.28	0.13	4.7
0.12	0.36	1.46
0.49	1.22	0.94
0.47	0.11	0.55
0.41	0.21	0.8
0.12	0.63	0.66
0.28	0.94	1.39
0.88	0.77	1.07
0.22	0.45	1.63
0.41	0.24	2.15
0.12	0.25	0.83
0.2	0.86	0.81
0.27	0.65	0.72
0.23	0.26	0.14
0.49	0.46	0.82
0.16	0.12	0.11
1.31	0.36	0.25
0.94	0.65	0.94
0.7	0.3	0.69
0.4	0.36	0.11
0.23	0.25	0.6
0.3	0.96	0.27
0.33	0.92	0.3
0.45	1.42	2.21
1.07	0.54	1.14
0.12	0.73	2.89
0.12	0.23	2.83
0.97	0.21	0.17
0.49	0.11	4.1
0.99	1.15	0.25
0.64	0.2	1.29
0.36	0.12	0.13
0.29	0.21	1.51
0.41	0.51	0.56
0.41	1.44	0.49
0.65	0.26	0.59
1.6	1.05	0.1
0.23	0.2	3.75
0.36	0.91	0.95
0.27	0.26	1.34
0.41	0.54	0.65
0.17	0.35	4.97
0.95	0.7	2.98
0.11	0.49	0.16
0.19	0.25	1.4
1.06	0.68	0.44
0.17	0.92	0.23
0.11	1.1	4.36
0.28	0.3	1.92
0.3	2.66	0.17
0.48	0.15	0.99
1.01	0.74	1.42
0.29	0.25	2.8
0.49	0.89	0.17
0.25	0.15	0.29
0.22	3.29	1.04
0.62	0.68	0.95
1.43	0.86	0.61
0.28	0.41	0.36
0.23	1.18	1.55
0.41	2.16	0.59
0.29	0.45	1.01
0.2	0.45	4.14
0.11	0.27	2.2
0.17	0.57	0.1
0.62	0.32	0.27
0.36	0.28	0.23
0.17	0.48	0.97
0.42	1.6	0.17
0.49	1.27	0.84
0.32	0.72	0.93
0.79	0.28	0.7
0.22	0.14	0.57
0.42	1.19	1.37
0.24	0.84	0.37
0.57	0.12	0.63
0.25	0.33	4.17
0.36	0.41	0.29
0.58	0.41	0.81
0.43	0.19	0.36
0.16	0.28	1.31
0.99	0.65	3.55
0.1	0.12	0.2
0.41	0.48	0.23
0.35	0.76	0.97
0.59	0.54	0.9
0.77	0.17	0.84
0.28	1.81	0.54
0.47	0.33	1.08
0.46	0.62	0.74
0.5	0.12	0.6
0.49	0.18	0.93
0.25	0.16	0.39
0.49	0.27	0.92
0.75	0.41	1.99
0.43	0.65	0.15
0.52	0.54	0.49
0.17	0.32	0.58
0.47	0.18	2.55
0.92	1.19	0.17
0.46	0.5	2.21
0.43	0.26	3.47
0.35	0.55	0.17
0.41	0.43	1.75
0.52	0.26	1.14
0.15	1.23	0.23
0.11	0.38	0.84
0.36	0.97	0.55
0.41	0.31	0.54
0.16	1.41	1.56
0.47	0.23	0.19
0.2	0.66	0.58
0.33	0.45	0.46
0.12	0.49	0.68
0.2	0.14	0.5
0.48	1.49	0.25
0.16	1.47	0.41
0.33	0.95	1.13
0.4	2.45	0.26
0.17	1.72	0.18
1	0.58	0.97
1.49	0.15	3.13
0.28	1.68	1.58
0.15	0.33	0.17
0.68	0.17	3.14
0.84	0.65	1.73
0.93	0.25	2.76
0.49	0.72	0.52
1.23	0.4	1.65
0.55	0.23	1.63
0.11	0.94	0.14
0.86	0.12	2.16
0.54	0.34	1.06
0.15	2.73	0.49
1.08	0.73	3.67
0.58	0.62	1.31
0.41	1.92	2.09
0.44	1.66	0.78
1.36	0.91	0.52
0.5	0.12	1.36
0.38	0.62	0.28
0.63	1.16	2.18
0.18	0.41	2.1
0.47	0.16	0.23
0.12	1.28	1.29
0.2	0.41	2.24
0.27	0.18	1.58
0.51	0.4	0.33
0.21	1.3	1.14
0.97	0.2	1.66
0.55	0.29	1.47
0.73	0.28	3.62
0.3	0.33	1.26
1.15	0.4	2.26
1.29	1.92	0.33
0.22	1.05	2.48
0.17	0.51	1.77
0.6	0.4	1.17
0.13	0.33	2.42
0.15	3.01	1.7
0.47	1.76	0.15
0.36	1.46	0.27
0.62	0.2	0.15
0.11	1.2	0.15
0.16	0.49	2.97
0.49	1.79	0.94
0.17	0.35	0.68
0.4	0.12	0.71
0.75	0.23	0.25
0.5	0.39	0.68
0.3	0.73	1.6
0.13	1.28	0.21
0.32	0.34	1.41
0.81	1.28	2.1
0.33	1.58	0.35
0.46	1.21	1.63
0.66	0.41	1.45
0.32	0.88	0.99
0.2	0.42	2.98
0.97	0.25	0.52
0.46	1.07	0.83
0.79	1.41	1.51
1.04	1.11	0.15
0.35	0.15	0.18
0.58	0.61	1.42
0.19	0.42	1.19
0.26	0.48	1.38
0.17	1.42	1.6
0.21	2	0.89
0.78	0.57	1.2
0.68	0.86	0.46
0.31	0.68	2.15
0.44	2.12	1.59
0.81	0.46	0.2
0.57	0.75	1.6
0.28	0.65	1.34
0.37	1.52	0.31
1.11	0.12	1.25
0.18	0.1	0.26
0.28	0.32	0.2
0.24	0.31	0.15
0.62	2.4	0.25
0.85	0.41	0.25
0.12	0.58	1
0.7	0.36	0.8
0.89	0.25	0.43
0.14	1.36	0.88
0.49	0.56	0.41
0.41	3.19	0.39
0.31	1.26	0.13
0.42	1.87	0.44
0.74	1.37	0.24
0.71	0.12	0.39
0.2	1.15	0.95
0.3	0.81	1.57
0.23	0.8	1.08
0.33	0.99	0.44
0.5	1.08	3.09
0.37	2.03	0.64
0.14	2.35	0.7
0.15	0.13	0.31
0.86	0.99	0.33
0.52	1.17	0.49
0.57	0.73	2.73
0.95	1.65	1.23
0.18	1.44	2.76
0.26	0.74	2.96
1.44	1.23	1.2
0.46	0.15	0.17
0.28	0.57	0.46
0.46	1.97	0.81
1.03	1.05	0.29
0.35	0.15	0.24
0.45	3.7	0.3
0.44	0.5	0.23
0.14	0.85	0.62
1.18	0.57	0.66
0.91	1.03	0.6
0.39	1.25	0.4
0.7	1.15	0.97
0.32	1.44	0.11
0.58	0.21	0.65
0.17	1.42	0.87
0.28	0.57	2.64
0.75	1.57	1.52
0.81	0.54	0.3
0.12	0.15	0.2
0.55	1.83	1.47
0.41	0.23	0.82
1.05	0.91	0.49
0.2	1.89	0.3
0.51	0.77	2.72
0.77	1.5	1.56
0.41	1.09	0.38
0.4	0.57	1.48
0.15	0.62	0.57
0.55	0.7	0.66
0.23	0.47	0.95
0.23	0.5	0.83
1.56	1.02	0.23
1.02	0.49	3.9
0.38	1.36	0.2
0.21	0.81	0.12
0.44	0.44	0.36
0.76	1.87	0.77
0.23	0.25	0.27
0.54	0.81	1.4
1.54	1.44	0.73
0.5	0.13	0.3
0.25	0.54	0.14
0.54	1.25	0.3
0.25	1.16	0.48
0.63	0.7	1.25
0.2	0.17	1
0.17	0.23	1.41
0.6	0.28	0.48
0.15	0.83	1.13
0.28	0.33	2.34
0.56	0.25	0.76
0.69	0.83	1.53
0.3	0.67	1.31
1.34	0.47	0.34
0.47	1.5	0.89
0.92	0.23	0.92
0.41	1.61	0.57
1.09	1.67	0.3
0.87	0.78	0.14
0.14	0.75	0.14
0.53	0.68	0.78
0.3	2.02	0.16
0.57	0.49	0.14
0.84	0.14	1.14
0.33	1.09	0.51
0.68	0.17	1.32
0.36	0.5	0.26
1.02	1.12	0.68
0.85	1.37	1.52
0.7	1.28	1.16
0.27	0.89	3.4
1.71	1.06	1.62
0.32	1.34	0.78
0.54	0.95	0.54
0.12	1.08	0.33
0.4	0.5	0.24
0.12	0.11	0.36
0.42	0.71	1.39
0.33	0.38	0.25
1.01	0.92	0.25
0.52	0.33	0.2
0.68	1.87	0.11
0.16	1.31	0.34
0.17	1.35	2.48
0.57	0.49	0.15
0.68	0.94	1.67
0.7	0.2	0.47
0.81	1.84	0.44
0.77	1.45	0.58
0.99	0.81	0.33
0.54	2.44	0.7
0.31	0.33	0.25
0.16	1.11	0.14
0.83	0.4	0.3
0.76	0.1	0.17
0.38	0.4	0.68
0.6	1.02	2.14
0.48	0.75	1.02
0.46	0.61	0.24
0.33	1.42	0.17
0.35	0.2	0.95
0.25	0.6	3.31
0.24	0.6	0.38
0.28	1.04	0.12
0.6	0.55	1.19
0.15	0.35	1.86
0.69	0.31	1.33
0.37	0.29	0.14
0.71	0.22	0.27
0.87	0.63	0.21
0.31	0.9	0.26
0.23	0.48	0.36
0.65	1.28	2.02
0.22	0.64	2.43
0.33	0.86	0.27
1.41	0.23	0.12
0.58	0.18	0.41
0.49	0.22	0.91
0.62	0.16	2.05
0.6	0.66	0.97
0.57	1	0.97
0.15	0.59	3.58
0.96	0.6	1.15
0.11	0.44	0.11
0.14	0.78	0.3
0.66	0.38	0.29
0.6	1.97	0.73
0.41	0.38	0.16
0.26	0.3	0.31
0.44	0.53	0.36
0.49	0.34	1.39
0.62	0.2	1.12
0.23	2.77	0.4
0.61	0.76	1.05
1.07	0.43	0.23
0.29	1.2	0.19
1.02	1.6	0.25
0.24	0.42	0.68
0.16	0.87	0.54
0.73	0.83	0.16
0.92	0.41	4.59
0.83	0.53	0.28
0.25	0.3	0.17
0.28	0.39	2.59
0.31	0.35	0.75
0.7	0.33	0.76
0.15	0.47	0.31
0.37	0.16	0.3
0.12	0.93	0.37
0.89	0.19	1.42
0.65	1.04	0.44
0.99	0.41	0.45
0.33	0.1	3
0.15	0.26	0.86
0.68	0.65	0.12
0.2	0.81	0.2
1.05	1.23	0.22
0.34	0.15	0.57
0.99	0.54	0.47
0.46	0.2	1.6
0.36	0.52	0.37
0.41	0.19	2.97
0.12	0.63	0.86
0.49	0.46	2.14
1.31	0.11	1.07
0.35	0.25	0.13
0.57	0.47	0.72
0.7	0.25	0.18
0.65	0.33	1.01
0.59	0.9	0.51
1.6	0.46	0.88
1.02	0.17	0.31
0.89	1.47	0.27
0.3	0.6	0.43
0.21	0.62	0.58
0.17	1.26	0.82
0.29	0.38	1.89
0.76	0.47	0.76
0.24	0.38	1.91
0.4	0.47	1.49
0.3	0.2	1.1
0.25	0.2	0.43
0.15	0.84	0.2
0.17	0.48	2.69
0.6	0.47	0.54
0.52	0.38	2.36
0.28	0.12	0.2
1.84	0.91	1.89
1.03	0.25	0.39
0.25	1.68	0.77
0.65	0.19	0.24
0.6	0.17	1.61
0.17	0.33	0.21
0.85	0.36	2.5
0.28	0.94	0.52
0.42	0.57	0.36
0.17	1.34	0.16
0.35	0.43	1.83
1.34	0.34	0.26
0.73	0.37	1.84
0.44	1.14	0.1
0.18	0.25	0.1
0.78	0.14	0.47
0.83	0.22	0.44
0.12	0.3	2.79
0.99	0.97	0.14
0.34	1	1.6
0.85	1.01	0.26
0.85	0.99	0.18
0.27	0.36	0.25
0.52	0.25	0.23
0.17	0.38	3.65
0.52	0.62	2.05
0.12	0.31	0.29
0.28	0.16	0.17
1.28	0.52	0.23
0.54	0.26	0.94
0.58	0.8	0.31
0.46	0.5	0.38
0.39	0.81	0.17
0.12	1.27	0.22
0.25	0.29	2.58
0.54	0.68	0.27
0.86	1.17	0.12
0.13	0.9	0.17
0.7	0.44	0.15
0.55	0.46	0.74
1.44	0.2	2.62
1.24	0.39	1.23
1.05	0.63	0.43
0.65	1.07	0.99
0.19	0.82	2.16
0.15	1.18	0.24
0.75	0.12	0.28
0.54	0.23	0.2
0.97	0.43	3.43
0.17	0.47	0.46
0.16	0.28	0.41
0.21	0.25	1.82
0.27	0.69	1.87
0.2	0.18	0.25
0.71	0.41	0.15
0.68	0.13	3.24
0.56	0.39	0.69
0.39	0.7	0.13
0.57	0.4	0.29
0.86	1.33	0.22
0.34	0.66	0.36
0.49	0.19	0.3
0.55	0.74	0.34
0.11	0.2	2.65
0.39	0.15	0.13
0.68	0.28	0.25
0.64	0.26	0.39
0.43	0.28	3.54
0.75	0.81	1.92
0.63	1.13	0.61
0.2	0.15	0.99
0.3	0.6	0.73
0.1	0.39	0.23
0.46	0.54	0.89
0.88	0.77	0.49
0.85	0.33	0.8
1.17	0.59	0.6
0.3	0.11	1.18
0.7	0.82	0.81
0.19	1.01	0.2
0.21	0.26	0.29
0.24	0.22	0.13
0.7	0.25	0.75
0.37	0.96	0.28
0.2	0.18	0.75
0.1	0.36	0.44
0.3	0.57	2.45
0.73	0.17	2.61
1.05	0.55	1.31
1.07	0.44	0.24
0.31	0.26	1.54
1.44	0.82	0.25
0.11	0.52	2.61
0.74	0.21	0.19
0.3	0.54	0.16
1.44	0.68	2.49
0.79	1.01	0.57
0.73	1.16	0.34
0.41	0.43	2.53
0.52	0.7	0.63
0.57	0.83	1.05
1.36	0.11	0.38
0.19	0.12	0.75
0.1	0.64	0.57
0.56	2.21	1.23
0.26	0.15	1.2
0.54	0.5	0.15
1.14	0.24	0.45
0.45	0.92	2.34
0.52	0.17	0.89
0.18	0.17	0.28
0.65	0.38	1.45
0.35	0.72	0.7
0.21	0.18	0.87
0.57	0.38	0.58
0.23	0.75	0.92
0.26	0.94	0.33
0.15	0.82	0.37
0.16	0.33	0.15
0.35	1.84	1.1
0.6	0.17	1.24
0.94	0.57	1.71
0.25	0.51	0.34
0.9	0.81	0.91
0.5	0.12	0.19
0.15	0.99	0.65
0.38	0.19	0.6
0.11	0.23	0.33
1.25	0.17	0.23
0.71	0.49	2
0.78	0.43	0.23
0.39	0.28	1.77
0.1	0.25	1.33
0.32	0.69	1.02
0.49	0.14	0.36
0.67	0.25	1.16
0.2	0.28	0.24
0.48	0.46	1.84
0.34	0.17	0.27
0.88	0.57	0.24
0.51	0.58	0.23
0.86	1.12	1.84
[truncated: 2,928 more rows]
