# Supplementary material for: Rational optimization of a transcription factor activation domain inhibitor
Source: Nat Struct Mol Biol. 2023 Dec 4;30(12):1958–69. doi: 10.1038/s41594-023-01159-5 (PMC10716049; doi:10.1038/s41594-023-01159-5)
Supplement: Supplementary file 17 — Statistical source data. [file 41594_2023_1159_MOESM17_ESM.xlsx]

## Sheet: Fig5B+C
Sourced from Supp table 2 - Small Mol Inh BioiD pivot table
	AR-WT-1aeLogFC vs DMSO	AR-WT-EPILogFC vs DMSO	AR-WT 1aelogPvalue vs DMSO	AR-WT EPI logPvalue vs DMSO
DIDO1	-1.20669	-0.428459	4.19338	0.815151
CCAR1	-1.06267	-0.383366	3.29054	1.34697
WDR37	-0.579575	0.164366	3.21456	0.622386
ZMIZ2	-1.1181	-0.55783	2.83724	0.912513
TLE3	-1.09083	-0.31828	2.82041	0.66299
CIC	-1.26873	-0.667617	2.73803	1.8219
DDX3Y	-0.425057	-1.11461	2.71948	1.00115
RBM10	-1.03726	-0.546771	2.68937	0.919821
TFEB	-0.895601	-0.531424	2.65074	1.63488
LDB1	-0.853844	0.310141	2.64784	0.478318
CCAR2	-0.829842	-0.621424	2.49128	1.9321
TCF7L2	-0.421741	-0.389806	2.46106	0.726368
MRPL4	-0.529508	-0.0473675	2.41627	0.351687
GATAD2B	-0.570421	-0.330904	2.38149	0.537322
PRR12	-0.657924	-0.510831	2.37143	1.47592
KPNA4	-1.03206	-0.36343	2.35739	0.718073
MED12	-1.23743	-0.270499	2.34165	0.667304
MED28	-1.45263	-0.467322	2.32847	1.49693
SUCLG1	0.457562	0.276399	2.28207	0.794531
TMEM219	0.679614	0.214313	2.26534	0.444555
NDUFS3	-0.860015	-0.817937	2.25522	1.19796
JMJD1C	-1.01969	-0.71923	2.23805	3.31197
HOXB13	-0.475498	-0.203578	2.18467	1.33378
STUB1	-0.829986	-1.53381	2.18467	2.91735
FBRS	-0.70604	-0.206587	2.16982	0.588803
RXRA	-1.23397	-0.810532	2.11725	1.17845
RBBP5	-0.922125	-0.156351	2.04169	1.2652
GTF2F1	-1.86802	-0.627271	2.03434	0.851542
PDAP1	-0.826054	-0.678672	2.02172	0.975548
TRIP4	-0.988389	-0.604649	2.01957	0.930982
OLA1	-0.597199	-1.20953	1.9825	1.15565
HDAC1	-1.10472	-0.13189	1.9809	0.483047
HAT1	-0.51871	-0.736981	1.97307	0.948194
NACC1	-1.61233	-1.09016	1.97082	2.85174
RBM12	-1.07812	-0.64582	1.96766	1.09373
BAG5	-0.787491	0.629572	1.96397	0.323534
NDUFV1	-1.77419	-0.809003	1.96094	0.777407
MATR3	-0.952518	-0.560225	1.94794	1.80971
MED6	-1.42721	-0.644485	1.93926	1.02718
PHF21A	-1.13615	-0.692893	1.9296	1.16272
PPP3CA	-0.807852	-0.842116	1.92956	2.46629
MYT1	-1.12531	-0.378451	1.92583	0.666741
NOSIP	-1.30878	-0.801285	1.91698	0.877165
EIF3M	-0.294018	0.0593326	1.91511	0.733557
HNRNPM	-0.877348	-0.588721	1.89463	2.86273
LIG3	-0.807495	0.414816	1.89012	0.418922
MRPL16	1.25147	0.931346	1.8549	0.522334
PAXIP1	-1.11156	-0.603278	1.84899	0.840894
WDR82	-1.35482	-1.09363	1.83818	2.22143
CTNND1	-0.588118	-0.353087	1.83199	0.952907
UBR5	-0.886902	-0.304519	1.82979	0.56972
DDX5	-0.668508	-0.761213	1.82386	1.26309
CHD4	-1.23633	-0.169468	1.82168	0.41944
SF3A1	-0.649234	-0.013616	1.80266	0.30103
MT-CO2	0.403045	0.529376	1.80037	1.17673
RPA2	-0.206708	-0.560664	1.7957	0.850445
SF3B1	-0.758868	-0.295806	1.79025	0.818088
CBX3	-0.917236	-0.180099	1.78055	0.603174
PGRMC2	-0.927316	-2.06173	1.77073	1.51255
FOXA1	-0.615744	-0.386056	1.76959	1.3562
NXF1	-0.884025	-0.721952	1.74304	0.626626
VAPB	-1.34654	-1.12407	1.73324	2.89657
EFTUD2	-0.53841	-0.410136	1.71934	1.62118
HCFC1	-0.724298	-0.41612	1.71703	0.846945
RNF20	-0.396257	-0.913524	1.71206	1.48512
CASZ1	-1.07571	-0.495828	1.70987	1.31531
CALML5	-22.4662	-1.48294	1.70691	1.203
UBR4	-0.957767	-0.187661	1.70044	1.05818
RBM22	-1.02631	-0.680899	1.69755	1.90035
HNRNPA1	-0.653089	-0.152602	1.69137	0.550981
ATP2A2	-0.39245	-0.104793	1.68519	0.393861
MAVS	-0.687284	-0.963489	1.67612	0.825785
OGT	-0.859893	-0.262175	1.66911	0.54188
SF1	-1.562	-1.06387	1.65623	0.988656
LAMTOR2	-22.6612	-22.6612	1.63673	1.63673
ABR	1.32804	0.975813	1.62591	1.09263
WASHC4	-1.29559	0.139482	1.62341	0.352736
HNRNPUL1	-1.43277	-0.960212	1.62073	1.72966
SRSF5	-2.83359	-0.0955157	1.61918	0.344913
CSTF2	-0.895799	-0.900491	1.61549	1.77786
IRF2BPL	-1.44721	-0.884096	1.61072	1.95582
RCOR1	-0.695779	0.399332	1.60838	0.625207
CNIH4	-0.193904	0.0209088	1.60353	0.537665
DMAP1	-1.40216	-0.690199	1.59879	0.780756
WRNIP1	-1.15884	-0.644328	1.59345	1.30123
VPS26C	-0.499846	0.0676595	1.57535	0.590798
EPC1	-0.511983	-0.117635	1.57454	0.725037
KDM3B	-1.20628	-0.74483	1.5717	1.43527
WDR70	-1.74951	-2.48318	1.56957	1.70838
TBK1	-1.44558	0.210802	1.56833	1.30822
RPS6KA5	-0.924826	-0.255459	1.56174	1.03606
IRF2BP2	-1.64245	-0.929852	1.55929	2.61796
TSN	-0.436936	-0.651862	1.55339	1.0827
AP2S1	-0.635274	-0.819737	1.55244	1.29793
PPP6R2	-1.92928	-0.470147	1.55112	0.666777
MAP2K3	1.04614	-0.356399	1.54985	0.98506
NCOR2	-0.711757	-0.462611	1.54564	0.977442
NCOA6	-1.4966	-0.868836	1.53845	1.15975
PCBD1	0.792004	0.229524	1.53196	0.456755
VDAC1	0.590868	-0.327894	1.53196	0.638472
MLH1	-1.24134	-0.533911	1.5252	2.09895
SF3B3	-0.646755	-0.199781	1.52488	0.834009
RING1	-0.746718	-0.0489282	1.51694	0.351796
PRPF4	-0.746441	-0.387386	1.51197	1.30489
MIDEAS	-1.32314	0.0842646	1.51064	0.337584
ZNF609	-0.878671	-0.340319	1.50624	0.500128
IDH2	0.611114	0.374834	1.50107	0.390113
TMED9	-0.15479	0.338845	1.49724	0.914798
MED1	-1.61149	-0.795504	1.49258	0.966816
PSMC4	-0.531856	-0.931079	1.48022	1.343
PCNP	-0.5091	-0.644609	1.48016	1.5581
GTF2F2	-1.09877	-0.816232	1.47222	1.60052
RPS6KA1	-0.689173	-0.779122	1.46486	1.1842
TDRP	-1.74954	-0.724821	1.46356	0.665463
NUP188	-0.71281	-1.17069	1.46159	0.826325
XRCC5	-0.579534	-0.375145	1.46007	1.39503
TRIM28	-0.715153	-0.677315	1.45802	1.53599
TEAD1	-0.873579	-1.88453	1.45639	0.891254
ZNF292	-1.62434	-0.509357	1.45477	1.21482
SSR1	0.630661	1.67342	1.45247	0.783642
RUVBL1	-0.280081	-0.256651	1.45097	0.975311
ANO3	-0.739478	-0.0652434	1.45011	1.44388
RTF1	-1.17045	-3.15859	1.44701	1.04862
PCGF3	-0.873144	-1.13369	1.44526	1.04051
MED17	-1.16488	-0.440055	1.44439	0.654188
ANKRD17	-0.486316	-0.193731	1.44122	0.832304
GLO1	-0.47365	-0.811239	1.4411	1.49292
DYNLL2	-0.583843	-0.525165	1.44039	1.33357
SF3A2	-0.577632	-0.682809	1.43789	0.954243
MNX1	-1.09396	-1.12043	1.43578	1.30154
MARK2	-0.056826	0.294304	1.42934	0.700647
DRG1	-0.284588	0.132595	1.421	0.392095
ABCB6	0.0700153	0.196881	1.42083	0.748576
HDAC2	-1.11158	-0.258147	1.41608	0.465567
HNF1B	-0.179652	-1.11198	1.415	0.808243
STRBP	-0.913808	-0.351668	1.41438	0.479755
CDK12	-1.64799	1.2628	1.414	0.431727
POLR2L	-1.3656	-0.654288	1.41304	0.783801
PRPF3	-0.695226	-0.620335	1.41248	1.91386
NDUFS2	-1.18981	-0.664852	1.40781	0.827984
EPM2AIP1	-1.03649	-0.671838	1.40518	0.981939
CSRP1	-0.800317	0.0582682	1.40298	1.22199
XRN2	-1.12874	-0.746989	1.40123	1.2056
ARNT	-1.27755	-0.795188	1.40083	1.02696
PSMD1	-0.638989	-1.24315	1.39873	1.74225
MRPS24	-0.830723	-0.656906	1.39796	2.13258
BCL9	-0.795232	-0.657389	1.39699	1.00125
CHD3	-0.658963	-0.355352	1.39695	0.453618
STRAP	-0.783104	-0.0557581	1.39579	0.39522
MOV10	-0.659271	0.169041	1.39198	0.668887
TRIP12	-0.974133	-0.501275	1.39081	1.86582
ORC3	-0.614018	0.14679	1.38867	0.445656
ERF	-0.227398	0.141907	1.38714	0.855967
POLR2A	-1.43262	-0.438867	1.38713	0.583834
RPA1	-1.01878	-0.888641	1.38412	3.31197
MCMBP	-1.62748	-1.33923	1.37885	1.32253
FOXJ3	-0.643955	-0.555645	1.3783	1.53612
PLAA	-0.586923	-0.595248	1.3734	1.67408
ZBTB12	-0.333938	-0.435899	1.37046	0.912894
MEF2D	-1.02346	-1.03497	1.36967	2.57247
NFIA	-0.899648	-0.218899	1.36944	0.589491
DNTTIP1	-1.54358	-0.386855	1.3633	0.698102
RPP21	-1.81594	1.46894	1.3599	0.326623
SKP1	-0.56842	-0.0907481	1.35899	0.496388
AP2A2	-1.6979	-1.53223	1.35741	1.54118
ADSL	-1.23196	-1.94994	1.35302	1.44735
PARG	-21.2936	-21.2936	1.35128	1.35128
GAPDH	-0.81454	-0.829959	1.35018	1.02139
SIX4	-0.83638	-0.710948	1.35014	0.927908
TMEM97	0.416125	0.116223	1.34846	0.675049
RACK1	0.420382	0.528769	1.34257	0.658661
GSR	0.619499	0.518526	1.34163	0.642424
NUP133	-1.34951	-0.621442	1.33801	1.75861
BCL9L	-0.582417	-0.362063	1.33439	0.78692
DLD	0.40217	0.282271	1.33378	1.02572
SNRNP40	-0.412004	-0.0943135	1.33187	0.569092
GRHL2	-0.831949	-0.435941	1.32249	0.985489
SHTN1	-0.861271	-0.27603	1.32192	0.71669
PHF3	-0.884828	-1.33557	1.31947	1.38423
CAPZB	-0.718786	-0.665017	1.31437	1.03472
AFG3L2	-0.951915	-0.613389	1.31049	1.19503
RNF2	-0.756144	-0.137441	1.3092	0.527857
NFIX	-0.455813	0.952809	1.30914	0.628169
THADA	-0.397686	-0.789311	1.30761	1.35133
MRPS10	-0.600885	-0.0250523	1.30761	0.315346
RASA1	-0.232874	-0.241212	1.30715	2.44318
LAD1	-1.23021	-1.13944	1.30286	0.966793
HEXIM1	-0.822668	-0.209756	1.30249	0.396552
SEH1L	-0.558651	-0.331963	1.30135	0.924587
SMAD4	-1.29948	-0.50519	1.30129	1.00366
SF3B5	-0.601239	-0.165045	1.29949	1.02572
RCOR3	-0.877793	-0.111316	1.29895	0.919571
CNOT2	-1.0707	-1.40215	1.29851	1.13653
HMG20A	-2.11059	0.483817	1.29768	0.524636
HM13	-0.399571	0.30183	1.29693	1.40781
TAF6	-1.932	-0.8185	1.29309	0.766683
RPS19	0.142448	0.461096	1.2914	0.542481
CNP	-0.745916	-0.289527	1.29108	1.5437
RAB3GAP1	-0.390467	-0.301745	1.28849	0.533481
CPSF2	-0.645702	0.0252556	1.28683	0.30722
SF3B4	-1.6346	-0.175998	1.2865	0.670991
ATXN1L	-0.665722	-0.605225	1.28476	1.17521
CLPX	-1.62506	-1.43379	1.28113	1.20365
NSRP1	-21.9478	-0.809761	1.28094	0.707955
MED20	-0.879039	0.102077	1.2782	1.22978
MBD3	-1.18426	-0.642292	1.27736	0.528376
CFDP1	-0.85562	-1.32018	1.27408	1.31461
COBLL1	-1.75495	-0.0199543	1.27231	0.977881
HOXC9	-1.14743	-0.310064	1.27055	1.06313
PMS1	-0.994706	-0.698372	1.26699	2.52281
CUL7	0.445957	0.53357	1.2658	1.80593
JPT1	-1.12538	-0.449405	1.26469	0.993482
RBPJ	-2.14876	-0.189902	1.26357	0.387144
FIP1L1	-0.924376	0.0324627	1.26146	0.320515
TFIP11	-0.101392	-0.342068	1.26029	0.449784
TRMT10C	-1.28169	-0.990169	1.25834	0.870994
MRPS35	-0.898156	-0.441173	1.25709	1.77786
GATAD2A	-1.52194	-0.363929	1.25474	0.491815
LARP7	-0.768275	-0.75773	1.24984	0.895021
TNPO2	-0.147371	-0.449005	1.24193	0.776618
ARID1B	-0.34245	-0.363219	1.24191	0.834627
EEF1A1	-0.299066	-0.103644	1.24135	0.434175
SMC1A	-0.770783	-1.18051	1.23916	1.35542
DDX1	-0.853775	-0.368082	1.23827	1.15043
PRSS3	0.0381239	-0.79981	1.22884	0.972274
ZBTB33	-0.715888	-0.257865	1.22877	0.620306
MAML3	-0.866094	-0.776058	1.22788	1.09014
PKP3	-0.925091	-1.12794	1.22788	1.11532
CTNNA1	-0.589206	-0.576952	1.22541	1.3562
AGTRAP	0.094999	-0.467038	1.22465	1.00139
PHF14	-0.917584	-0.285593	1.22345	0.636887
TIMM44	-0.702496	-0.655599	1.222	1.25826
CANX	-0.465136	0.0313744	1.22147	0.367011
TCERG1	-1.07028	-0.539538	1.21684	1.22884
AFTPH	-0.375484	1.11043	1.21451	0.854
CMTR1	-1.62058	-0.530497	1.20962	1.13737
POP1	-0.762356	-0.658514	1.20841	1.12478
CDKN1B	-2.67085	-0.445619	1.20675	0.566728
CHN2	0.748922	0.317669	1.20592	0.612802
EIF5B	-0.564234	0.249678	1.20509	0.431835
LIN54	-1.96451	-1.36966	1.20272	1.10753
FAM50A	-1.06662	-1.56341	1.20155	1.20334
TRMT1L	-0.439199	-0.687963	1.19632	0.980561
NSF	-0.581852	-1.02487	1.1917	1.16195
BRCC3	-0.673882	-0.320282	1.1902	1.15513
SAP18	-0.0312673	-0.441552	1.18932	1.63519
PC	0.161724	0.120566	1.18839	0.675049
FOXK1	-0.811767	-0.984711	1.18793	1.21122
SIN3A	-1.40919	0.19101	1.18625	0.419752
YTHDF3	-0.832568	-1.28356	1.18565	1.54722
RAB25	0.510349	-0.202826	1.18124	0.936394
LMO4	-0.742938	-0.477266	1.1796	0.903923
YTHDF1	-0.211881	-0.087408	1.17609	0.388313
SLC4A1AP	-0.250476	0.095121	1.17585	0.346406
YAP1	-1.57284	-0.821041	1.17387	1.62072
TRNT1	1.16687	0.574027	1.1738	0.303289
RPS5	0.289205	1.05159	1.17379	0.544101
SDE2	-22.8202	0.358263	1.17291	1.54762
MGA	-0.533499	-0.0686098	1.17069	0.385617
EMD	-0.871736	-0.795174	1.16904	0.933018
FUBP3	-0.730338	-0.789202	1.16684	1.24198
MEPCE	-0.217652	-0.0105538	1.16638	0.3122
NOTCH1	-1.64547	0.0388622	1.16616	0.335365
WHAMM	1.02498	0.807688	1.16171	1.02865
LYZ	0.396756	-0.546129	1.16036	1.0067
RPS2	0.139186	0.455876	1.16029	0.664855
ATXN1	-1.38646	-0.676465	1.15868	2.29256
ZNF268	0.381818	1.61831	1.15564	0.307284
GTF2E1	-1.96868	-2.88902	1.1547	1.10768
RAB14	-1.25413	-0.970781	1.15346	1.00046
PIH1D1	-1.58616	-1.22262	1.15025	0.98389
HINT1	-1.42201	-0.00765137	1.14974	0.813973
GPS2	-0.668244	-0.332902	1.14635	0.971395
COPB2	-0.624923	-0.715282	1.1453	1.07449
INO80D	0.220862	-0.263477	1.14502	0.442324
CC2D1A	-0.211009	-1.25309	1.14288	1.50773
FOXP1	-1.00286	-0.761558	1.14284	1.51197
RPRD1B	-1.89263	0.0797429	1.1336	1.13776
RPL4	0.229367	0.0646787	1.13313	0.396523
ACTA1	-0.201676	0.0697659	1.13313	0.421996
SART1	-1.5982	-0.252502	1.13139	0.42133
FAM120C	-1.58871	-0.851163	1.12993	0.776282
TXN	-0.282797	-0.62789	1.12726	0.959639
DPM1	-0.61653	-1.36422	1.12622	1.98333
EIF2AK2	0.444534	0.200534	1.12568	0.63815
EDC3	-0.903823	0.174792	1.12555	0.426226
LMNA	0.48801	0.129607	1.12271	0.555614
XPC	-0.133496	-1.05972	1.12258	1.65471
GLS	0.313184	0.630502	1.11976	0.327717
ELOC	-0.345882	-1.20641	1.1167	1.09428
PAK4	-0.232653	-0.217596	1.11351	1.80084
SEC13	-1.65475	-0.0926727	1.11311	0.389125
TACC2	-1.87637	-0.638962	1.1114	1.16037
ADNP	-0.863062	-0.68928	1.10486	0.89124
BRD4	-1.20643	-0.970361	1.10354	1.55078
SLC25A11	0.695662	0.237549	1.10305	0.444198
ATXN2	0.744956	0.379387	1.10177	0.549319
CTBP1	0.488888	-0.571866	1.10131	0.619891
MYO1D	0.42005	0.0211974	1.09996	0.304159
CPSF7	-0.649964	-0.744668	1.09917	4.94961
NCOA1	-0.600882	-0.534393	1.09897	1.05274
KDM1A	-1.20235	0.179683	1.09802	0.417854
GTF3C5	-0.4193	-0.153202	1.09794	0.435435
EP400	-1.43813	-1.01135	1.0979	1.16358
DCTN2	-0.620071	-0.673168	1.09667	1.03431
ZC3H14	-1.4469	-1.29316	1.09545	1.2874
EIF3K	-0.62802	-2.11103	1.09366	2.95872
HUWE1	-0.866987	-0.678398	1.09294	2.21563
CD2AP	-1.05664	-0.470683	1.09239	0.968117
MAML1	-0.607115	-0.364399	1.09163	1.16919
USP5	-1.16582	-0.740123	1.09142	0.997016
P4HB	-0.877484	-1.45161	1.08947	1.0878
RPRD2	-0.964338	-0.756162	1.08845	1.61621
TUBG1	-0.839526	-0.675955	1.08522	0.796415
PDIA3	-1.16823	-1.41947	1.08336	1.19606
ACTR1A	-0.952885	-0.211238	1.0815	0.875061
DUSP23	0.618406	0.705707	1.07866	0.359528
AP2B1	-1.60594	-0.418357	1.07787	1.36705
FOXK2	-0.737277	-1.54044	1.07782	1.47432
ECI2	-2.02707	-1.18101	1.07751	1.08525
SUMO2	-0.721235	-0.467141	1.07707	1.00322
KPNA3	-0.776652	-0.804853	1.07694	1.285
ONECUT2	-1.2198	-0.886561	1.07669	1.06955
HSPE1	-1.04135	-0.54781	1.07481	1.15685
PAK2	-0.501087	-0.315678	1.07314	0.769349
RFX5	-23.249	-0.865591	1.07287	1.11439
SYMPK	-0.776688	-0.520779	1.07243	1.05663
EIF4G3	-0.380314	1.23239	1.07184	0.527866
SUGP2	-0.857933	-0.724258	1.07123	1.2082
DCAF7	-0.748144	-0.230419	1.07056	0.415351
MRPS9	-0.847042	-0.184598	1.07	0.735104
C7orf50	-0.642719	0.233895	1.06908	0.795021
SF3B2	-1.72252	-0.446217	1.06817	1.46007
TFRC	-0.730156	-0.456266	1.06638	0.812856
NFIL3	-23.1863	-1.15456	1.06477	1.13316
AP3B1	-1.26453	-0.852349	1.06374	0.9041
RPP30	-1.1027	-0.23488	1.06285	0.974134
GTF3C3	-1.17066	-0.636142	1.06232	0.971294
RREB1	-1.01759	-1.13425	1.0619	0.842804
KDM2B	-0.586151	-0.0870668	1.0607	0.439565
MRPS17	-0.254935	-0.121519	1.06051	0.528443
EYA3	-0.350132	3.84036	1.05767	0.630779
IFI16	-0.580372	-0.746317	1.05718	0.658124
SAFB2	1.0969	1.52293	1.05577	0.348211
ANKHD1	-1.48838	-1.4739	1.05386	0.96184
PPIH	-0.81941	-0.976268	1.05377	1.55159
ATP6V1B2	-1.37518	-0.709896	1.05278	0.851993
PTCD3	-0.716988	-0.534354	1.05207	1.06757
SNRNP200	-0.884492	-0.153601	1.05183	0.911858
TOMM40	1.18862	-0.16487	1.05151	0.480086
MAGT1	-1.05222	0.747131	1.04647	0.379347
NDUFA4	-0.435283	-0.581185	1.04599	0.872423
ZNF24	-2.12866	-0.8536	1.04476	3.62054
PCGF6	-0.845941	-0.711428	1.04267	0.78347
CDKN2AIP	-1.01833	-0.517209	1.04137	1.50363
JPT2	-0.619292	-0.714097	1.04105	2.43709
PSAT1	-1.45333	0.0991147	1.03726	0.741814
STIP1	-0.744424	-1.3349	1.03716	1.01839
MRPS30	-22.408	-22.408	1.03708	1.03708
MCRIP1	0.876003	0.716837	1.03707	0.83563
TFAP4	-1.15802	-1.32208	1.03704	0.867987
CHCHD3	-23.0857	0.26981	1.0369	0.553518
VCL	0.783979	-20.735	1.03686	0.675049
AMACR	-1.12375	-0.785286	1.03673	1.02529
CCT8	-0.287574	-0.449866	1.0365	0.998557
DMXL1	-0.068219	-0.359271	1.03631	0.898513
LYPLA2	-1.25273	-0.784241	1.03623	1.00118
RAB6A	-0.409524	-0.810459	1.03596	1.05463
PIK3C2A	-1.58805	-1.44615	1.03589	1.05683
IARS2	-0.525334	-0.0778664	1.03557	0.419187
PFKFB2	-22.025	-0.672615	1.0353	0.841093
SFPQ	0.332043	0.0225628	1.0352	0.334525
XRCC6	-0.750403	-0.0914817	1.0349	0.621814
PPP1CA	-1.321	-2.60737	1.03477	0.948437
ETFA	0.423126	-0.959842	1.03472	0.715737
KDM6A	-0.714646	-0.419162	1.03364	0.710275
COPS8	-1.08871	-0.601741	1.03337	1.03484
AK4	-0.737039	-1.1055	1.03313	1.3659
KHDC4	-5.78582	-0.476056	1.03297	0.692079
BEND3	-1.0935	-0.601929	1.03294	0.693291
CDK9	-1.62134	-0.690544	1.0326	0.891623
LRRC59	-1.21969	-0.108483	1.03256	0.466941
TDRD3	-22.3911	-22.3911	1.03233	1.03233
VPS35	-1.38374	-1.48433	1.03201	1.08241
POLR2C	-2.40336	-1.46476	1.03199	0.664144
ELP6	-20.2605	-0.73288	1.03173	0.859953
KMT2E	0.240639	-0.160171	1.03144	1.13586
SAP130	-1.57596	-1.22282	1.03072	1.31118
ATG3	-0.510677	-0.591183	1.0307	0.629999
JUNB	0.83843	0.0411564	1.02997	0.430743
TES	0.177716	-2.61745	1.02983	0.839008
API5	0.0498634	-0.816261	1.02952	0.675049
RBM5	-1.73179	-0.406684	1.02952	0.411341
PHAX	-1.97091	-0.151049	1.02932	1.93297
CAPRIN1	-1.52744	-0.553411	1.02903	0.551598
CWF19L1	-0.867556	0.408364	1.02849	0.384891
PTP4A2	0.777164	0.867122	1.02839	0.547021
SYTL4	-0.659771	-0.760583	1.0276	1.52337
CAMK2D	1.65282	1.51307	1.02742	0.415645
SMAP	-1.53542	-1.24961	1.02726	0.929477
L3MBTL3	-0.504993	-1.60605	1.02637	0.961247
CLN6	-0.857646	-0.054144	1.02572	0.675049
PEX19	-0.69423	-1.17393	1.02572	0.867987
RTN4	-0.613005	0.148712	1.02572	0.795021
PLEKHA6	0.0119056	-0.578303	1.02572	0.675049
HSPA9	-0.517385	-0.396123	1.02572	2.42732
SOX21	-19.1001	-0.763205	1.0249	0.983213
USP47	-0.831969	-0.683726	1.02383	1.01186
EIF2B4	-0.94413	-4.45207	1.02383	0.928472
ZNF141	-21.6611	-0.549992	1.02357	0.403085
GCLM	-0.251987	-0.504395	1.02356	0.917015
MRPS18C	-23.9536	-0.894094	1.02271	1.03313
TLE5	-0.747065	-0.441696	1.02202	0.63834
WWC1	-20.1604	-20.1604	1.02145	1.02145
AP2M1	-0.574903	-0.627178	1.02043	1.05285
TLK2	0.228997	-0.906456	1.0198	0.683244
LPXN	21.623	0	1.0195	#DIV/0!
SSB	-0.669612	-0.180263	1.0193	1.01436
SLC25A10	0.589093	0.177934	1.01917	0.765193
PHKA1	-1.37731	-0.904159	1.01851	1.71404
EXOSC7	0.356482	1.02665	1.01839	0.30103
MYH9	-0.152773	-0.227045	1.01839	1.24735
WDR5	-0.173511	0.42223	1.01839	1.00893
PEX5	0.0100299	-0.546099	1.01831	0.37158
DDX6	-0.705354	-0.592995	1.0174	1.30817
UIMC1	0.105349	-0.482366	1.01696	0.915191
UHRF1BP1L	-1.93336	-0.213121	1.0164	0.963854
SEPTIN8	0.880789	0.358577	1.01457	0.934265
ZNF598	-4.93289	-0.683115	1.01439	0.94807
RDH11	0.724975	-0.156903	1.01251	0.416063
NDUFV2	-0.406226	-2.39223	1.01221	0.976598
VCP	-1.37145	-0.980134	1.01207	0.908866
CHMP4B	-1.66022	-1.51729	1.01186	1.04696
ARL8B	-0.982642	0.385349	1.01186	0.995985
ATP1A1	-0.214459	-0.0436086	1.01186	0.326216
COX7A2	1.23765	-0.847837	1.01186	0.803868
TBX3	-0.582557	-0.687196	1.01186	1.27
SPAG7	-22.4881	-22.4881	1.01103	1.01103
INTS3	2.11616	1.40994	1.01066	0.825009
NCBP1	-1.57491	-1.97171	1.01036	1.27886
CUX1	-1.09444	-0.620357	1.01008	1.31678
SH3GL1	-0.11085	-22.7255	1.00988	0.932799
RSF1	0.4701	-2.17504	1.0067	0.834642
NUDT21	-0.946238	-0.920577	1.00623	0.815361
SART3	-1.35673	-0.425457	1.00571	1.12605
PATJ	-0.966068	-0.478857	1.00486	1.35978
GRSF1	-2.06991	-0.36048	1.00452	0.940489
BCKDHA	-0.727465	-0.10928	1.00448	0.462166
SEPTIN11	-0.718993	-0.370223	1.00379	0.774728
IRF2BP1	-1.17742	-1.27445	1.00337	1.02404
BCKDK	-1.59451	-0.334378	1.0027	1.0681
ARL2	-0.926694	-0.962228	1.00219	1.07605
MRPS26	2.14269	-0.158035	1.0018	0.796878
TOLLIP	-22.6232	-0.406646	1.00139	0.486557
AGO2	-0.798441	-0.251146	1.00061	0.497243
DDOST	1.03228	0.50333	1.00019	0.579975
NVL	-0.987439	-1.75475	0.99994	0.978011
RYBP	-2.45974	-0.31255	0.9994	0.830311
SLK	-0.280511	-1.59594	0.99862	1.47488
TMEM38B	0.269247	0.00447198	0.99724	0.30898
HDAC3	-0.882818	-0.191405	0.996671	0.457483
BICD1	-1.39034	-22.0294	0.996432	0.955031
MIA2	2.56848	1.6739	0.996165	1.04167
NFIB	-1.24337	-0.3169	0.995695	0.740363
BUB3	-0.853507	-0.740055	0.995517	1.52943
RAVER1	-1.35833	-1.21403	0.995092	0.921033
CAD	-1.95071	-0.00708874	0.995042	0.318846
SF3A3	-2.82664	-0.569324	0.994715	0.453637
DSP	0.611539	-0.0612271	0.993838	0.327916
SELENOF	-1.02427	-0.846067	0.993648	1.0052
PEG3	0.377537	-23.3988	0.993648	0.675049
RBM3	-1.43797	0.181447	0.992826	0.498358
SNRNP70	-0.558688	-0.575878	0.992481	1.24434
PTK2B	20.56	22.1261	0.992347	0.675049
LRRFIP1	-1.07038	-0.30047	0.991726	0.686874
RPP25L	-0.48597	-0.610226	0.991711	1.077
KAT5	-0.19077	-0.507208	0.991648	0.544554
PRCC	-0.808823	-1.60224	0.991637	1.54408
ITM2B	-0.791907	-0.0874735	0.991517	0.319679
GATD3	-0.143937	-0.944547	0.991423	1.50566
PSPC1	-0.446288	-0.556309	0.990522	1.52926
CRTC3	-1.66459	-0.00516387	0.988916	0.319293
VDAC2	0.979437	-0.213164	0.987811	0.543187
DDX54	-0.874987	-1.60054	0.98691	1.31401
GRHL1	-0.151857	0.457391	0.986845	0.333752
MTA2	-1.21429	-0.0420721	0.985648	0.336164
VPS37A	-0.903135	-0.282013	0.985093	0.628379
ROCK2	-20.7227	1.43601	0.984878	0.377293
NFIC	-0.947227	0.0580356	0.984271	0.334174
DNAJC8	-2.51376	-0.923741	0.98375	0.688283
LSM14A	-1.9153	-2.71385	0.98375	0.976186
DAD1	0.963041	0.397909	0.982445	0.499687
PHF10	-0.93599	0.813004	0.981804	0.601054
PML	-21.7344	-21.7344	0.980408	0.980408
GLOD4	2.3275	-19.0032	0.980124	0.675049
HADHA	-1.00891	-1.62268	0.979895	1.02827
EIF2B5	-0.249334	-0.960197	0.979569	1.24954
MRPL47	0.0193995	-0.32704	0.979569	1.03137
PCID2	0.553801	-0.0475397	0.979336	0.822603
YWHAZ	-1.0376	-1.75292	0.978859	0.979528
NIPBL	-0.919928	-0.788101	0.978241	0.913279
PDCL	-22.4411	-0.983315	0.978011	1.03725
SNRPD1	-0.455726	-0.20309	0.977389	0.901821
ZBTB21	0.197419	-0.0307365	0.976598	0.310567
RPL35	0.19536	0.408044	0.975433	0.472285
AKAP1	-1.59504	1.04592	0.97478	0.561228
ZC3HAV1L	0.527121	-0.859051	0.974134	0.862055
ATN1	-0.2109	0.0880008	0.974134	0.827102
MRPS14	-0.7948	-0.768843	0.973944	0.947651
HNRNPH2	-1.03524	-0.178715	0.973533	0.514074
FAM98B	-1.15117	-0.93751	0.973133	0.914292
COG1	4.1219	1.0846	0.972984	0.559608
NCK1	-1.9369	-0.00401112	0.972848	0.30103
PSMD8	1.09929	0.247247	0.97142	0.489412
BAHCC1	0.953082	-0.0823354	0.970765	0.806441
BAZ1A	0.366726	-0.209039	0.970285	0.337063
PRPS1	-0.42548	-0.447233	0.969711	1.0681
NUDC	-0.758924	-0.582079	0.969138	1.09215
DOCK7	-1.41407	-1.51344	0.968378	1.02952
MED14	-2.71658	0.48447	0.968233	0.365569
CDCA8	1.81665	0.403549	0.967941	0.692936
KIF5B	-1.17942	-0.882882	0.966734	1.05177
HACL1	-1.32053	-1.81395	0.965977	0.943785
MMTAG2	2.2281	2.38796	0.965536	0.671518
DNM1L	-0.60837	-0.965582	0.964222	0.904252
MAPK1	-0.759291	-0.333273	0.962762	1.38981
HARS1	-0.174608	-21.2638	0.962697	0.675049
RPA3	-0.678464	-0.114525	0.962498	0.38783
NDUFB11	0.474497	2.22396	0.962426	0.47933
DPF3	0.636569	0.88568	0.961477	0.437117
ACOT9	-0.825365	-0.754128	0.961344	0.844383
ZKSCAN4	-0.92723	-1.82154	0.960783	1.02129
MRPL49	0.626906	0.441499	0.959606	0.495578
FNBP4	-0.543434	0.633126	0.958226	0.36589
SYAP1	0.355531	-3.14902	0.958226	0.802928
BBX	-2.32084	-0.897795	0.957874	0.877813
USP7	-0.843125	-0.066695	0.957721	0.363483
PFDN2	-1.04876	-1.7776	0.957286	0.899687
ZNF148	-0.887269	-0.608191	0.956981	0.909546
POGZ	-0.890985	-0.833087	0.956567	2.88898
HIRA	-0.687843	-0.319152	0.955523	2.2397
ZNF318	-1.19038	-0.715266	0.955459	1.35208
POU2F1	-0.888074	-1.18606	0.954482	0.944909
ELOA	-1.01451	-1.52723	0.953662	1.0173
SBSN	1.18493	1.34946	0.952029	0.674069
KPNA1	-0.727361	0.24165	0.950338	0.39516
KIFBP	-0.291726	-0.711592	0.950338	1.20497
UBE3C	-0.464604	-0.602687	0.950318	0.664823
DDX39A	-1.03494	-1.43746	0.95021	0.762916
TXNL1	-0.819212	-0.588851	0.95005	1.02197
ISL1	-21.8831	-0.702816	0.94807	0.485572
ZNF703	-0.599452	-0.406442	0.94807	1.33055
FAM111B	21.57	23.6138	0.94807	0.675049
NUP160	-0.938155	-1.42539	0.947843	1.21482
G6PD	1.01031	0.478139	0.947563	0.618274
SPRYD4	-1.12687	0.116691	0.947429	0.806962
WDR77	0.566059	-0.745942	0.947197	0.842105
CTSB	0.853375	-0.38243	0.946692	0.675049
VDAC3	1.30137	0.787025	0.946136	0.656961
NPM1	-0.353604	-0.206242	0.945566	0.907662
SUB1	-0.99533	-0.777013	0.943825	1.77025
COPS4	-1.22401	-0.634731	0.943549	0.896385
MED27	-1.02026	-0.560963	0.943081	0.627856
RPS18	0.318662	0.504026	0.942029	0.528618
PPP6C	-1.4653	0.276721	0.940581	0.541437
SOX9	-24.0308	-2.48171	0.939205	0.967785
PROSER1	-0.974134	-0.72747	0.937645	0.656118
MYH10	-0.395353	-0.767205	0.937505	0.932895
DDX42	-0.940985	-0.822138	0.93739	1.93204
PFDN6	-1.27201	-0.375663	0.936998	1.0619
IGBP1	-0.502722	-0.317817	0.936708	0.804726
MRPS31	-1.01526	-0.424657	0.936001	1.17283
UBN1	-0.849443	-0.693831	0.935325	0.606833
GTPBP1	-0.918814	-1.05705	0.933781	2.81475
PPP1R10	-1.08352	-0.782531	0.933779	1.34648
MASTL	-3.13178	-2.60024	0.933284	0.915743
ADGRG4	0.979776	-0.342419	0.933199	0.483169
ZFP91	-0.858169	-0.990613	0.932666	1.1191
STEAP2	1.2414	0.571957	0.932321	0.657953
WDR41	-20.8529	-20.8529	0.9321	0.9321
SUMO1	-1.01095	-0.210873	0.931973	0.497182
MICAL3	-1.03971	-0.469057	0.931662	0.413096
CHD8	-1.23271	-0.267272	0.931443	0.661949
ATP8B2	1.22554	0.336232	0.931213	0.373326
RPLP2	0.429956	0.818384	0.93061	0.616871
SNRPD2	-0.275121	-0.783398	0.930485	0.962036
NASP	-3.06743	-3.59795	0.930348	0.955846
RPLP0	0.437675	0.680425	0.930315	0.550119
HNRNPH3	-1.68873	-0.570384	0.929664	1.14069
OCRL	-1.28526	-0.383621	0.929605	0.966
DNAJA3	0.91022	0.762577	0.927752	0.979554
MYCBP2	-1.30076	-1.71279	0.927489	0.752347
SELENBP1	0.30755	-0.277949	0.927019	0.505515
STIM1	-0.437251	-0.365662	0.925353	1.11454
PSMD13	-0.942909	-0.977446	0.924931	1.46324
HDGF	-0.508487	-0.65412	0.924569	0.94807
ADO	1.59023	-20.731	0.923772	0.675049
TAF9B	-0.884804	-1.05188	0.92298	1.21351
MADD	1.67032	-19.5187	0.922831	0.838291
TPR	0.512352	0.489169	0.92258	0.879575
RPS21	0.428821	1.00566	0.92106	0.626219
ASH2L	-0.549676	0.0925774	0.920288	0.393996
EXOSC5	-3.09292	-2.34863	0.920064	0.988339
ECI1	-1.89593	-1.70935	0.918914	0.864418
MTPAP	-1.99842	-0.940705	0.918521	0.740766
ARL1	-0.258618	-0.0779244	0.918471	0.367632
WIZ	-1.39487	-2.11646	0.918152	1.50871
CDK13	-0.830762	-1.15067	0.91772	0.837837
TARS1	-1.28315	-3.11397	0.917391	0.808056
CBFA2T2	-1.51708	-1.44905	0.916171	1.03734
MDH2	-1.90906	-2.82909	0.91611	1.23353
DDX24	-0.0907268	0.0846728	0.915989	0.759229
IVD	-22.5673	-1.43808	0.915876	0.936446
EIF3H	-1.19571	-0.494654	0.915553	0.945803
AGO3	-1.37985	-0.137926	0.91553	0.77901
RAD54L2	-0.600114	-1.24195	0.915032	1.02978
MIA3	0.331776	-0.617874	0.914798	1.05396
MTDH	-1.06101	-0.677292	0.914694	0.350831
SEPTIN7	-0.277881	-0.507901	0.913909	0.891981
YEATS2	-0.737174	-0.0363483	0.913117	0.322056
CCNK	-1.5635	0.606036	0.911768	0.634682
PPA2	-2.67367	-1.08685	0.911615	1.00038
CHAMP1	-1.00976	-0.802839	0.911118	1.16467
AP3M1	-0.344764	0.159864	0.910737	0.587297
SND1	-0.230939	0.301146	0.910689	0.502738
IWS1	-1.87303	-1.79987	0.910323	0.915584
ERBIN	-0.723255	-0.986496	0.909031	1.01468
LPCAT3	-0.406576	-0.218219	0.907612	0.430993
KIF11	1.77692	-20.1257	0.90752	0.791912
GRIPAP1	-0.723983	-21.3485	0.907476	0.827434
EMC1	7.28578	-0.113291	0.905665	0.313968
AP3D1	-0.816584	-0.58249	0.905038	0.879328
RPS7	-0.128848	0.615106	0.903923	0.937719
ZMIZ1	-0.688561	-0.858551	0.903869	2.21973
PSME3IP1	-0.548688	-0.827902	0.903627	1.49985
GLUD1	-0.868113	-0.644439	0.902941	0.758598
KHSRP	-0.450378	-0.488336	0.902277	1.46072
ASF1A	-1.23275	-0.391488	0.901454	0.537665
LYRM7	-1.03083	-1.41536	0.900584	0.911135
CHD6	-0.421982	-0.713735	0.90046	0.626532
SNX5	-20.9248	0.603398	0.900456	0.357686
RAPGEF6	2.1487	0.797696	0.900335	0.399311
ZC3H15	0.374999	-0.222887	0.900265	0.461464
UBN2	-0.72599	-0.871111	0.900073	1.40692
MRPL45	-0.61661	-0.134774	0.899913	0.471961
PSMD10	0.400954	0.920026	0.899775	1.10864
PSMA3	-2.12264	-1.1688	0.899004	0.768462
CLCC1	-2.1065	-1.15089	0.898836	1.27184
GTF3C1	-1.20983	-1.30993	0.898476	0.74376
JMJD6	-21.049	-1.43774	0.897632	0.956505
SMARCA5	-0.765089	-0.533797	0.897422	1.2683
WDR33	-1.47501	-0.901514	0.896655	0.658792
RAB11FIP1	-20.7987	-20.7987	0.896408	0.896408
PRRC2A	-0.587259	-0.574238	0.895974	2.15008
MED8	-1.39829	-1.1851	0.895814	0.782596
SQSTM1	-1.64383	-0.351854	0.895352	0.706903
SEPTIN2	-0.561588	-0.135092	0.895168	0.506974
GLYR1	-0.645893	-0.159432	0.894939	0.396341
MRPS16	-0.792798	-0.145089	0.894147	0.488068
GMPS	-0.201101	0.0226642	0.892323	1.78039
PKP1	4.90258	-0.605822	0.890838	0.678175
NSD3	0.336749	-1.54612	0.890787	0.619629
DHX15	-0.348214	-0.0900658	0.890616	0.383181
SNTB2	-1.04314	-0.76079	0.890392	0.578086
CIRBP	-1.00846	0.115906	0.890163	0.462736
AP2A1	-0.654414	-0.557537	0.889167	0.832971
SBNO1	-1.30232	-1.49432	0.888616	1.85506
CBX5	1.58628	1.30225	0.88851	0.675046
CBX1	-1.79932	-0.615785	0.88831	0.309335
MRPS34	-0.8754	0.171005	0.88831	0.519208
NSDHL	0.628865	-0.444788	0.88831	0.675049
ZRANB2	-2.08971	-0.561453	0.888006	0.792479
MAP1S	-0.289245	-1.388	0.887422	1.0325
CORO7	-1.48032	-0.834253	0.885972	0.476184
TRAPPC3	-22.5214	-2.39605	0.885882	0.911349
P4HA1	-1.2599	0.0876278	0.885094	0.459298
TWF2	1.16088	0.984102	0.884873	0.913303
COMT	-0.823774	-0.421446	0.884765	0.675049
PRMT9	-21.2278	-1.1507	0.884594	0.955846
RTN3	-1.95627	-0.629214	0.881745	0.708284
PAF1	-1.12994	-0.476593	0.881376	0.563925
PDS5A	-1.27295	-1.84604	0.881283	1.27912
NTPCR	-0.353858	-0.686641	0.881088	1.81546
PRPF31	-1.81871	-0.131747	0.880656	0.490436
TPD52L2	0.0218427	-1.86101	0.880397	0.718916
GCDH	-0.697564	-0.0867555	0.879969	0.354317
MRPL39	-2.29525	-0.385093	0.879874	1.23197
HSPA5	-0.603113	0.0826945	0.879043	0.37289
RPN2	0.911612	0.779118	0.878675	0.874747
GTPBP10	-2.8998	-0.0584782	0.878563	0.326013
CABIN1	-0.481078	0.115951	0.877089	0.405097
SUPV3L1	-1.46654	-1.18452	0.875899	0.851656
SORD	-0.415064	-0.740255	0.875821	1.05454
UBXN1	-0.380562	-0.454544	0.875061	1.04844
CAPZA1	-0.426069	-0.308497	0.874902	0.854
PACS1	-0.69302	0.0610349	0.874833	0.348526
NDUFA10	-0.256572	0.218766	0.873658	0.857385
SUDS3	-1.98321	0.131175	0.873283	0.562972
ILF2	-0.332191	-0.201771	0.873153	0.763955
JAGN1	0.955553	0.606068	0.87179	0.732943
RPS12	0.411604	0.359324	0.871255	0.496388
EXOSC9	-0.494535	-0.671868	0.870144	0.581853
BOD1L1	-1.41626	4.23243	0.870144	0.636022
SREK1	-0.881882	-0.485172	0.870144	0.814063
ASCC1	-0.576685	0.242812	0.870144	0.94807
EWSR1	-0.735583	-0.497011	0.869625	0.916727
HNRNPDL	0.605649	0.55525	0.869329	0.877511
CHD7	-1.06337	-2.17935	0.868499	0.991174
BANF1	-23.6829	-3.36285	0.868376	0.880397
JUP	0.395029	-0.57519	0.868135	0.757849
GNL3	0.695316	-0.466762	0.867818	0.863652
NELFE	-1.08282	-1.70396	0.867166	1.09404
GLRX3	-0.0472997	0.366648	0.866823	0.959378
STMN1	-20.2463	-20.2463	0.866415	0.866415
HSPH1	-1.99377	-1.73422	0.865978	0.792871
UVSSA	-1.75874	-1.86495	0.865351	0.713934
SKI	-0.763239	-0.970664	0.864708	1.92956
SLC35B2	1.61899	1.40078	0.863967	0.663411
BLM	-1.44294	0.725149	0.863303	0.33336
GOLPH3	-1.38383	-1.14152	0.862735	0.505234
SPTBN2	1.3003	0.628448	0.862508	0.636816
PMS2	-2.40431	-1.49631	0.862055	0.762828
WAPL	-1.42983	-0.44284	0.861458	0.926293
RBM41	-23.0615	-0.526435	0.860547	0.981434
GTF3C2	-1.17222	-1.02618	0.858987	0.632598
BMS1	-1.89128	-2.11945	0.858721	1.14134
NFKB1	-0.821868	-0.198565	0.857554	0.691839
FBRSL1	-0.492832	-0.276555	0.856812	0.619038
STBD1	-0.293968	1.04848	0.856376	0.314357
H2AC14	0.414629	0.663656	0.856376	0.593373
SEC61B	-0.891922	-1.15974	0.856229	0.730809
CEBPB	-0.791947	0.680259	0.855521	0.795021
PPIL1	-0.90364	-1.3994	0.854548	1.44999
CREBBP	-1.24729	-1.35601	0.853903	1.11064
C11orf98	-0.273084	0.0995855	0.853832	0.331902
GARS1	-1.31636	0.832778	0.853763	0.465058
RTCB	-0.652218	-0.652649	0.853411	1.41115
TLE1	-0.978803	-0.155009	0.85281	1.7745
RECQL	-2.48865	-0.477933	0.851291	0.592329
GOPC	-21.8342	-21.8342	0.851208	0.851208
MAP1B	-1.02262	0.102221	0.850097	0.356453
FLNB	-0.80831	-0.823959	0.849428	1.43039
SH3D19	-2.75992	-1.1287	0.849092	0.566775
VGLL4	-1.78819	-0.468458	0.849051	1.00646
COPS2	-2.19103	0.190541	0.848661	0.895774
PQBP1	-22.7462	0.123842	0.847161	0.465822
KMT2D	-0.477981	-0.145713	0.846945	0.496457
ACOT1	-1.37926	-0.95565	0.846911	0.965319
PEBP1	0.189215	-0.755157	0.845954	0.421366
NCAPG	-6.77311	-0.234367	0.845727	0.537665
CCNT1	-0.725437	-0.471455	0.845006	0.935836
HMCES	-20.8395	-1.71245	0.844553	0.882088
NECAP1	-21.3604	-21.3604	0.844279	0.844279
SMNDC1	-3.0135	-1.14084	0.844279	0.818587
SF3B6	-0.565957	-0.445253	0.844279	0.698153
LEO1	0.293592	-0.292261	0.844279	0.394489
EIF3I	-0.325934	-0.602831	0.843718	1.8242
EPPK1	-1.11782	0.291504	0.843634	0.458027
BAG2	-0.279165	-0.368747	0.842238	0.621569
RHBDD2	0.481483	0.159208	0.842037	0.852172
HSD17B8	-1.25881	-0.500123	0.841625	1.03313
OSBPL8	-1.09136	0.0731641	0.840936	0.368257
CSTF2T	-23.0933	-1.80837	0.840293	0.774308
ZCCHC8	-3.4494	1.47352	0.839974	0.471498
FADS2	0.26859	0.23548	0.839474	0.503194
ZNF207	-1.20442	-0.6735	0.839459	1.04363
STAM	-22.8466	-22.8466	0.838291	0.838291
ESRP1	-0.663988	-3.33828	0.838291	1.02887
EIF3J	-1.30705	-1.18623	0.838021	0.941425
COPS5	-1.61019	-0.225409	0.837379	0.662611
AFF4	-1.97843	2.53979	0.837014	0.661837
CAP1	-0.575382	-2.94936	0.837014	0.955657
PPP4R2	-2.48186	0.707105	0.836517	0.703509
HNRNPF	-0.422933	-0.270731	0.836515	0.810996
USP15	-1.17127	-1.00677	0.835478	0.639825
SCAF4	-1.21473	-0.0446437	0.835388	0.370935
FUBP1	-1.0189	-1.20837	0.834388	1.19486
DDX46	-0.368277	-0.701055	0.834212	1.79607
DHX29	-0.233889	0.713823	0.834127	0.958226
TK1	19.8759	0	0.833596	#DIV/0!
PFDN5	-0.634571	0.354829	0.833596	0.864418
L3MBTL2	-0.784046	-1.51369	0.833387	1.56303
RBM4	-0.624096	-1.26646	0.833197	1.23526
POLR3C	-22.2495	-0.683633	0.833119	0.921464
SNRPC	-0.463781	-0.707576	0.832653	1.26087
CEP85	2.53305	1.45754	0.831714	0.619152
KDM6B	-0.584696	-0.380428	0.83146	0.632234
WARS1	1.0369	0.77879	0.831241	0.49445
TIMM10	1.52869	-0.463171	0.83112	0.361205
POLR2B	-1.61587	-0.379573	0.830406	0.655407
PNPT1	-0.711898	-1.19022	0.82911	1.23666
CISD2	-0.307642	0.974681	0.828716	0.844279
FN1	1.0147	1.08051	0.828414	0.766955
SLC39A6	0.173847	-0.733211	0.828191	0.428387
RAD23B	-0.924636	-1.52345	0.827774	1.01288
SYCP1	0.761429	-0.142139	0.826233	0.468232
KLC1	-1.36827	-1.7397	0.824439	0.937943
RAB21	0.553619	-0.470551	0.824422	0.656243
CDC16	-1.3031	-1.31722	0.824112	1.01173
DIS3	-0.804019	-0.903743	0.824112	0.675049
RPS27L	0.117989	0.0662469	0.824112	0.824112
PRRC1	-0.1731	-0.295295	0.824096	1.46151
GRB10	-0.267268	-1.10376	0.823726	0.777326
PCYT1B	2.22044	1.61736	0.823621	0.670795
DNAJA1	-0.793375	-0.446319	0.823516	1.13159
LONP2	-1.66896	-1.82902	0.822564	0.82535
UAP1	-1.5832	-21.4456	0.82225	0.793791
RPAP3	-1.06819	-1.38289	0.822089	1.15137
AP1M2	0.665413	-0.603758	0.821288	1.15995
MBD5	-0.283917	0.431718	0.821243	0.964849
RBM15	-0.4793	-0.872155	0.821036	0.919373
AGFG1	-0.623833	-0.61493	0.820807	1.69137
KIF4A	-0.83418	1.672	0.820784	0.396671
TUBB	-0.442552	-0.12288	0.820284	0.417152
VEZF1	-1.41876	-1.88606	0.819762	0.743455
CCDC124	1.12688	1.94182	0.819256	0.601345
ATP1B3	-0.602749	-0.479258	0.819113	0.676474
HDAC10	-0.444018	0.0653862	0.818365	0.323847
HLTF	0.366339	-0.823359	0.818272	0.597382
TFE3	-23.7831	0.677971	0.817863	0.675049
PRKCI	-1.20541	-1.87831	0.816918	0.746628
DAP3	-1.1126	-0.225328	0.816002	2.09112
RAF1	1.08576	0.815888	0.815647	1.09691
MRPL1	-0.64354	-1.15639	0.815647	1.00549
HMMR	-0.817888	-1.67066	0.815116	0.811211
TRPS1	-1.06415	-0.773233	0.815044	0.893328
LPP	-0.417582	-0.832806	0.814801	1.00139
NMD3	0.452563	0.565062	0.814512	0.841093
HSPB1	0.459138	0.145583	0.813285	0.589729
PCCB	0.202679	0.292033	0.813026	1.03557
USP34	-0.349095	-0.107447	0.812117	0.451469
COPS7A	-3.38355	-1.29908	0.812029	0.845955
FAM193A	-0.546004	-0.715037	0.811751	1.43774
MIOS	1.02998	1.19101	0.811639	0.323303
ATP5PB	0.728656	0.0841692	0.811238	0.350244
SLTM	0.708751	1.07431	0.81054	0.700838
TIMM13	-1.72648	-1.77949	0.810384	0.927374
SRSF11	-0.429557	-0.461164	0.810189	1.36194
TXLNA	-21.1801	-1.69688	0.807058	0.626376
RUFY1	-1.08142	-1.96825	0.806029	1.01602
CSNK1A1	-0.751117	-0.822025	0.805723	1.28208
PHAF1	-22.0076	-0.336303	0.805235	0.385117
DNAJC11	22.7699	21.6783	0.804811	1.00337
RPS25	0.516345	0.787985	0.804174	0.575538
TCEA1	-22.433	-22.433	0.803868	0.803868
MIPEP	3.22372	4.45797	0.803825	0.992613
NUP50	-0.776128	-0.402631	0.80239	0.884781
FOXP4	-1.44182	-1.37567	0.801414	0.977746
PGRMC1	-23.4074	-0.896513	0.80108	0.798745
KPNB1	-0.488276	-0.725915	0.800496	1.22841
ABCD3	-0.562375	-0.133736	0.800211	1.02572
MRPS2	-0.719777	-0.616971	0.800056	0.98858
PRKAR1A	-0.629319	-0.89176	0.799406	0.777006
ADAMTS1	-1.3393	-0.266379	0.799192	0.736753
NCOR1	-0.592635	-0.627853	0.798907	1.50222
HNRNPUL2	-2.75504	-0.0618099	0.798536	1.01186
AP1B1	-1.86345	-1.38128	0.798219	1.09796
TCF20	-0.486975	-0.426784	0.797815	1.03076
SUPT4H1	0.00657985	0.029116	0.796761	0.85025
GEMIN4	-0.653124	-0.324488	0.796677	0.882561
LRRC40	-1.13803	0.331788	0.796544	0.404858
NDUFS7	-0.937277	-1.22881	0.795629	1.25218
CTBP2	-0.798508	-0.130597	0.795577	0.355356
PRMT5	-1.90532	-1.0032	0.795466	0.920136
MTREX	-0.270476	-0.753931	0.795444	0.820206
STT3A	-0.156444	-0.0421313	0.795021	0.366546
EEFSEC	-0.070431	-0.555881	0.795021	0.343896
NUP107	-0.975815	-0.699547	0.794907	0.924614
RBM8A	-0.763312	-0.486724	0.794687	0.869771
SBDS	-0.622703	-0.0329727	0.794618	1.12564
PINX1	0.184809	-0.560666	0.794393	0.81085
TPD52	0.262149	0.304386	0.79412	1.119
NDUFAF7	-3.05373	-0.832529	0.793438	0.901375
KPNA6	-1.45176	-1.15839	0.793138	0.956781
COPS3	-1.98622	-0.343264	0.792705	0.858987
PWP2	0.0597759	0.463557	0.792277	1.30489
THNSL1	-2.07211	-1.06164	0.791441	0.670693
EIF4B	-0.532209	0.122485	0.790727	0.333471
CPT2	-1.18213	-0.606764	0.790283	1.11705
ATP6V1G1	-22.4185	-22.4185	0.789991	0.789991
MKI67	-0.386319	-0.729165	0.789657	0.843658
TET3	-0.764441	-0.642294	0.788854	0.613514
GOLGA5	2.59357	0.177329	0.788685	0.447752
TCF25	-0.0254167	-1.3479	0.787573	0.75983
RPS17	0.469667	0.650967	0.787561	0.551777
NKRF	-0.0171317	-0.102613	0.7869	0.680452
DNAJA2	-0.47252	-0.29417	0.786679	0.483998
HSP90AB4P	-0.647683	-0.522329	0.785384	0.786912
KMT2A	1.26413	-0.484693	0.785041	0.700046
WNK1	-0.39093	0.216229	0.784253	0.593373
SH3PXD2B	-1.06604	-0.766594	0.783502	1.0168
RALBP1	2.33515	0.945194	0.782867	0.841595
MAOA	0.384656	-0.113708	0.782307	0.412775
EMSY	-0.913835	-0.606361	0.781485	0.739013
ZNF280D	-2.49229	-3.24613	0.78142	0.796164
EZR	-0.49687	-0.365308	0.781131	0.970811
EP300	-0.773432	-0.841199	0.780153	1.48565
MRPS25	-1.17035	-0.365314	0.779958	0.490985
TNRC6B	-0.830733	-0.302797	0.77909	0.517209
LANCL1	-0.868378	-1.65081	0.778801	0.716947
TBPL1	-24.7061	0.554073	0.778609	0.899578
VAPA	-0.451041	-0.431166	0.77858	1.60819
MTA1	-0.884973	0.432797	0.77783	0.487298
CARS1	0.686646	-0.0842765	0.777598	1.32393
JUN	-1.36675	-0.842351	0.777387	0.781684
SMARCAL1	-2.24806	-0.159896	0.776355	0.383049
LENG9	-2.4431	-0.105081	0.776115	0.675049
MRPS6	-1.33463	-0.461531	0.775906	0.720843
RPS13	0.298452	0.752817	0.775884	0.809255
IRX4	-0.418727	-0.283849	0.774723	1.66072
CTR9	0.265452	1.15048	0.774443	1.03668
ZMYM4	1.11852	-0.0619137	0.774406	0.7908
MRPL55	-3.11145	-0.737942	0.774255	0.428757
ATRX	-2.4089	-2.04359	0.774	0.807656
ARL6IP5	0.20601	-0.0809093	0.773775	0.503373
MAP3K21	-1.376	0.0356254	0.773685	0.309178
TOX4	-1.52335	-0.829873	0.773588	0.765239
CSNK2B	-1.3131	-0.298224	0.773169	1.4245
DPCD	-2.39555	-0.98159	0.773111	0.788545
ACTG1	-0.18412	-0.0463316	0.772455	0.30103
TCF12	-0.185218	-0.222501	0.772006	0.633459
TCF3	-0.453406	-1.14472	0.771899	0.70671
RPS15	-1.16206	0.290316	0.771726	0.677811
CNDP2	-0.392186	-0.416395	0.770196	0.680452
RBM33	-0.605819	-1.88309	0.769993	1.1603
SMU1	0.193364	0.629021	0.769898	0.751999
TMPO	-1.09728	0.261417	0.769431	0.327328
SRRM1	-1.8176	-0.899605	0.769093	0.870583
TMOD3	-0.872134	-3.41217	0.767966	0.982287
PCM1	-1.36096	-0.163059	0.767739	0.882947
DDX17	-0.263496	-0.821598	0.767546	1.27387
NUP58	-0.291348	-0.123944	0.767385	0.351098
SHROOM2	-0.247086	-0.788335	0.767156	0.482095
GADD45GIP1	-2.00918	-2.30747	0.767004	0.80194
KAT6A	-1.75253	-21.221	0.766725	0.941936
FOSL2	-0.657669	-0.555272	0.766507	0.801778
PES1	-0.699836	-1.75842	0.766043	1.16508
MAP2K1	-2.83059	-1.36579	0.76586	0.855931
BIRC6	0.987451	0.0776681	0.765433	0.417091
CAMSAP1	-1.37302	-1.18506	0.76499	0.78015
GSE1	-0.342034	-0.0626439	0.764623	0.396872
MBTD1	-1.21081	0.245417	0.7646	0.401536
AARS1	-0.332767	-0.439844	0.763183	0.95875
CPSF1	-0.770949	-0.0867949	0.762878	0.36642
ZFR	-0.790068	-1.40376	0.761922	1.62171
BDH1	-1.50248	-0.948473	0.761488	0.716599
MED13L	-21.0999	1.56979	0.761388	0.822453
HDGFL2	-22.8909	-0.869707	0.760947	0.798664
WAC	-0.649847	-1.64406	0.759465	0.705768
TOP1	-1.05081	-0.614641	0.759456	1.51245
MMAB	-23.0192	-2.14921	0.759229	0.771417
MED13	-22.4738	-0.0577827	0.758779	0.443753
TCEAL4	-0.783808	-20.4813	0.758561	0.986535
MRPL24	-0.523615	0.117924	0.758561	0.990522
RFX7	-0.846691	-1.10077	0.758528	0.690892
POP7	-0.214591	-0.304375	0.758495	1.00739
JUND	-1.76013	-0.519612	0.757567	1.0406
CKMT1A; CKMT1B	0.910275	0.769086	0.757416	0.975311
PAICS	-0.464161	-0.654705	0.757334	0.932525
SNRPA1	-1.57303	-0.098425	0.757173	0.381223
CHTOP	-22.3688	0.528526	0.756471	1.01341
EIF2B3	0.646354	-0.252141	0.756236	0.395423
OXCT1	-1.09903	-1.45099	0.755575	0.750195
FLII	-2.38625	0.49969	0.755336	0.536749
DPYSL2	-2.22905	-0.295983	0.755216	0.698855
PATZ1	0.971647	-0.107394	0.754644	0.388491
HADHB	-1.39157	-0.638306	0.754603	0.634061
RPL29	0.552029	0.287956	0.752663	0.453692
MTA3	-3.03441	-0.374282	0.752347	0.610888
THRAP3	-0.601809	-0.57098	0.751508	1.09843
MED15	-0.437245	-0.588141	0.751186	1.13578
DHX38	-0.511916	0.148528	0.750393	0.455106
NUMA1	0.324445	0.0398987	0.750283	0.326406
UQCRC2	0.398665	-0.374242	0.750209	0.818393
BCOR	-0.40479	-0.320415	0.750195	1.71206
HS1BP3	-0.592313	0.129178	0.750195	0.78845
YWHAE	-1.62584	-1.32901	0.749499	0.758193
CKB	-1.25588	-0.781373	0.749269	0.807698
RPS29	-0.755277	-0.560286	0.749197	0.721613
ATP5F1B	0.500862	-0.292835	0.74911	1.17694
FADS1	0.637587	0.599633	0.749102	0.870434
SSBP3	-3.33271	-3.60925	0.748374	0.770378
PYGO1	-24.105	-0.209896	0.74831	0.443114
MARCKSL1	-1.9669	-5.04861	0.748095	0.727882
CEP350	0.660428	-0.538685	0.747542	0.837311
ILVBL	-0.437559	-0.467626	0.747534	1.18839
GDF15	-3.46983	-0.972975	0.7473	0.771234
PAPOLA	0.166865	-0.753831	0.747224	0.955769
OR2Z1	-1.91396	-0.0744114	0.746496	0.357692
MSTO1	-1.925	-0.48704	0.745991	0.966816
QRICH1	-0.812869	-0.450639	0.745759	0.641318
AHCTF1	-1.48308	-1.56755	0.745755	0.986889
SRSF3	0.452525	0.233294	0.745099	0.562975
CNOT7	-0.780501	-2.52026	0.744934	0.974526
RFC4	0.0533112	-19.994	0.744127	1.01393
PDLIM1	2.01565	-20.3913	0.744127	0.675049
SRP68	-3.69618	-3.70202	0.74401	0.741932
NDUFA12	-0.837998	1.15731	0.743934	0.977147
FLNA	-0.389322	-0.510954	0.743898	0.985822
RAB29	-0.701006	-0.245962	0.742595	0.62209
MRPS22	-1.05918	0.150431	0.742377	0.686827
NDUFA5	-2.12743	-0.0815639	0.742164	0.376817
CCDC47	-0.118197	-0.186326	0.741993	0.504339
FNBP1L	-3.74149	-2.14787	0.741598	0.739829
PHC3	-0.382381	-0.232127	0.741442	0.729913
DIABLO	-0.716668	-1.35805	0.741422	1.72368
LEMD3	-1.39832	0.113132	0.741142	0.571275
SPINT2	-22.5892	0.0300143	0.740594	0.830311
TXNL4A	-22.5325	-1.59279	0.740594	0.581441
DNAJC21	-21.5084	-1.33336	0.739578	0.625816
NANS	0.0636294	-0.0386513	0.739486	2.47224
ZMYM2	-0.706102	-0.208883	0.738928	0.539436
LAMTOR1	-1.01035	-0.582287	0.738348	1.03653
SARS1	-0.775861	0.430022	0.737663	0.437436
TAB1	-2.01866	2.04554	0.737186	0.632001
ACIN1	1.1707	0.856709	0.736894	0.648864
DLST	-0.324894	-0.927857	0.735631	0.828034
U2SURP	-0.591892	-0.612688	0.735462	0.917878
DVL2	-0.419155	-0.684425	0.735357	0.817681
PSMA7	-0.972057	-1.72381	0.735265	0.825919
GPS1	-0.436976	-0.509879	0.73518	0.86444
HOOK1	-1.58254	-0.0976445	0.73514	0.590555
FABP5	0.111221	-2.64372	0.735114	0.751781
HLA-C	-1.79069	-2.68247	0.735104	0.769153
CSNK1D	-0.88244	-0.130727	0.735104	0.760947
PRPF8	-0.317152	-0.438941	0.735104	1.70983
SNX1	-1.90228	-22.4436	0.735104	0.833596
NDUFA9	-0.826886	-0.226707	0.734666	0.452769
DCXR	-0.523017	-0.733622	0.734314	0.821234
NUP62	-0.435248	-0.116181	0.733845	0.41709
DGKH	-2.06622	-2.452	0.733767	0.810944
FKBP15	-0.758713	-0.20915	0.733127	0.713054
CREB1	-2.26605	-0.00487875	0.732957	0.304555
NRDC	0.628787	-0.691205	0.732931	1.27534
BOLA2; BOLA2B	0.441223	-0.092151	0.732759	0.380649
EBP	0.365934	0.43604	0.732759	1.08522
LAMTOR3	-1.80895	-0.156769	0.731708	0.864061
TRIP11	0.4735	0.234269	0.731578	0.389412
N4BP1	-0.874897	-2.16815	0.731328	0.742513
PITX1	-0.413914	-0.620539	0.731207	0.77821
MRPS23	-2.10525	0.0324637	0.731068	0.675049
DERPC	-0.519042	-2.59134	0.729612	0.961566
EIF3A	-0.681654	-0.808969	0.729385	1.3295
COPS6	-3.18786	0.140676	0.729364	0.46545
WDHD1	-0.429986	-1.43341	0.7292	1.29068
NELFA	-1.1325	-1.01128	0.729093	0.860843
TET1	0.140721	-0.685755	0.728946	0.744167
RBM25	-0.929059	-1.10563	0.728058	1.14424
NCOA2	-0.606432	-0.613285	0.727665	1.68492
RPS3A	0.163807	0.413071	0.727628	0.478055
SCRIB	-0.977371	-0.00572932	0.727225	0.304018
PEA15	0.154627	0.449329	0.727225	0.934305
SLC25A13	0.480443	0.217915	0.726668	0.42433
ANP32A	-0.515837	0.21552	0.726209	0.501694
ANXA6	1.33014	-21.9301	0.726142	0.675049
DBR1	-1.85829	0.150808	0.725811	0.505263
SEC23IP	-0.810623	-0.412992	0.725606	0.689856
TEX10	-1.71753	-1.42721	0.725415	0.771757
MRPS5	-1.00641	-0.442719	0.724837	0.915123
AIMP2	-0.262235	-0.437062	0.723677	1.04385
CSTF1	-3.09694	0.638486	0.723302	0.851485
TIMM23	0.653838	1.33832	0.722296	0.718635
PRRC2C	0.3806	0.150742	0.722243	0.444671
UTRN	0.0511428	0.191742	0.721167	0.675049
RPL12	0.18742	0.497113	0.720995	0.605246
TRIM33	-0.905018	-1.12359	0.719447	1.16902
SLC2A1	-2.00063	-1.49125	0.718191	0.879248
NDUFS4	-1.56242	0.736726	0.717851	0.795021
GNB2	-0.31638	-0.250554	0.717851	0.735279
LDAH	-0.0127579	0.335663	0.717851	0.675049
GLMN	-1.19138	-1.22434	0.717842	0.998557
STAP2	0.668672	-0.165961	0.717569	0.571156
PKP4	0.613848	0.0940851	0.717415	1.19241
PSMB3	-0.529627	-0.640053	0.717351	0.687412
RPLP1	1.1323	1.13724	0.716525	0.587899
AASDHPPT	-0.182016	-0.422879	0.716344	0.752706
RPSA	0.209928	0.723545	0.715405	0.593572
MRPS18B	-1.60052	-0.100941	0.714668	2.07057
MBOAT2	-0.293621	-0.670359	0.713934	0.591548
INTS14	0.905116	-0.29602	0.713433	1.01963
TRMT112	-24.1461	-1.984	0.712682	0.675049
PPIL4	-1.73539	-0.82491	0.712467	0.620082
EHMT1	-1.29862	-1.1904	0.71245	0.500305
DDB1	-3.50114	0.255005	0.712449	0.807329
PDCL3	-4.74826	-0.758885	0.712319	0.397036
SFXN1	0.561173	0.764444	0.712056	0.428611
CSNK2A1	-1.51259	0.289833	0.709886	0.724778
CDK11A	-0.338907	-0.129436	0.70984	0.338606
MRPL58	-1.16847	-0.618199	0.708622	0.322712
CAMK2G	-1.6761	-0.129462	0.708551	0.675049
SLC30A4	0.658646	-0.136944	0.707949	0.68815
CSNK2A2	-2.36293	0.731532	0.707889	0.565373
MYL6	-0.832508	0.31796	0.707423	0.553154
ADAR	-0.418472	-0.674448	0.707224	0.974735
RPS24	0.244723	0.0213098	0.707224	0.352693
PPP2R1A	-2.29092	-0.182973	0.706993	0.991579
RNF10	0.579836	-20.985	0.706524	1.02877
C1QBP	-0.467304	-0.172633	0.705917	0.420285
SMCHD1	-0.874254	-0.324716	0.705832	1.24191
BAG3	-3.41294	1.42971	0.705802	0.602779
CORO1B	-0.496122	-0.472559	0.705357	0.699513
DSC1	1.2934	1.08424	0.705217	1.11371
CDC73	-0.949732	-0.0506257	0.704412	0.379015
BTAF1	-1.14234	-2.30888	0.703727	1.40005
WASHC5	0.116078	-1.6104	0.703509	1.0263
LRBA	-0.610763	-0.999105	0.7032	1.73182
MT-ATP6	1.03283	0.791396	0.702575	0.710194
LIN9	-23.5985	1.1839	0.702435	0.552699
POLDIP3	-0.789607	-1.2762	0.702208	0.980481
EIF4ENIF1	2.03998	-2.58442	0.70188	1.16172
WDR6	-1.07377	0.420179	0.701694	0.456942
PKM	-0.885882	-0.420727	0.701654	0.761329
LIMD1	-0.675614	-1.00273	0.700587	2.28953
ANAPC5	-1.87493	-1.43204	0.700356	0.879282
NUDT5	-2.02593	0.307084	0.699932	1.16944
EIF3L	-0.4912	-0.829573	0.699256	1.20793
DDX41	-4.59142	-5.64512	0.69822	0.694392
CLUH	0.772745	0.677305	0.698008	0.762766
POLR2H	-1.01992	-0.745269	0.697865	0.516555
TMEM209	-0.414628	-1.28846	0.697419	0.969359
ZNF281	-0.371615	-0.457223	0.697113	1.39333
ACAD9	-0.6526	-2.7467	0.695768	1.00144
NAGK	-22.8979	1.36643	0.695732	0.614868
PDCD6IP	-0.766773	-1.94308	0.695237	1.38403
GATAD1	-6.00283	0.558826	0.695157	0.677933
MRPS11	-1.68441	0.226417	0.69437	0.643101
TET2	-0.546348	-0.78396	0.694347	0.793581
SLC31A1	1.90627	3.32121	0.693732	0.695849
TANC1	-0.579782	-0.770751	0.693312	1.22863
SMG7	-1.30655	-1.70353	0.69313	1.03705
PRKRA	0.810513	-0.227556	0.693117	0.442622
SS18	-0.61737	0.993174	0.692936	0.311478
PSME3	-1.50966	0.15264	0.69216	0.540635
TSG101	-1.87865	-0.534008	0.691161	0.861666
PDXDC1	0.0350174	-0.547505	0.69082	1.94963
LZIC	0.615001	-0.716547	0.69073	1.03596
LARP4B	-0.916167	-1.72446	0.690514	0.757815
FAM83H	2.2707	5.59092	0.689631	0.680957
NAP1L4	-0.83346	-0.589436	0.689403	0.658508
ZNF746	-0.950012	-0.810973	0.689342	0.636286
PAGR1	-1.03724	-0.383604	0.688834	0.448523
MAP4	-0.348973	-0.29453	0.688585	0.720652
MRPS28	-1.4007	0.263891	0.688433	0.653192
REPS1	2.50716	-18.1391	0.688283	0.963448
MAGEA10	-4.31121	-1.15959	0.688027	0.596874
SEC23B	-0.73845	-0.683128	0.687477	0.883679
SDHB	-1.90117	-1.31643	0.687404	0.51871
UBA52	-0.622829	-0.768124	0.686524	0.787627
BCLAF1	-0.420577	0.0162337	0.686207	0.308872
NCAPH	-0.480538	1.13706	0.686174	0.634161
MECOM	0.193072	-1.1835	0.686148	0.682293
COX17	0.948436	-0.921043	0.685551	0.99181
CSTF3	-0.712993	1.04245	0.6854	0.590924
TOR1AIP1	-0.482203	-0.112488	0.685322	0.86077
MRPS21	-1.08802	0.200926	0.685187	0.632522
CHERP	-0.360972	-0.742749	0.684647	1.18558
IDH3B	-1.75265	-0.353933	0.684346	0.729
NUP98	-1.30013	-0.165397	0.683284	0.613259
KALRN	0.59643	1.13908	0.683059	0.694763
GANAB	-0.432023	-0.147745	0.683049	0.671584
ATF3	-4.75834	-0.0687875	0.682555	0.70108
DHCR24	-0.540589	-0.6264	0.682297	1.06601
PDCD5	-3.33823	-1.20304	0.681045	0.682342
ZC3H4	-8.62917	-7.18636	0.680672	0.678371
ZMYND8	-1.89931	-0.377865	0.680216	0.57114
MED22	-0.915573	-0.993511	0.680193	0.645174
NCOA3	-0.476446	-0.667833	0.679969	1.08866
FXR1	-0.402344	-0.0668143	0.679824	0.313056
PPP1R2	-2.01938	-0.777974	0.679112	0.646085
MRPS7	-0.831928	0.424978	0.679053	0.697558
NUDCD2	-0.38824	-0.734054	0.678807	1.63954
IPO11	-0.673229	-1.44986	0.677978	0.966307
CRCP	-0.48596	-21.2845	0.677901	0.675049
PREP	0.709149	1.11227	0.677097	0.392964
SYT4	-0.139958	0.271362	0.676827	1.31122
N4BP2	0.020331	0.267585	0.675049	0.517911
SRSF4	-0.0367778	-0.496001	0.675049	0.675049
ALG6	0.0398098	-0.710553	0.675049	1.03111
NDUFA1	0.143003	0.78805	0.675049	0.675049
NOB1	0.359634	-0.660285	0.675049	0.815647
REEP5	0.32554	0.0313299	0.675049	0.675049
ELP5	-0.193528	-19.7401	0.675049	0.675049
RPL36A	0.35767	-0.103403	0.675049	0.675049
HK2	-0.638445	-1.28499	0.675049	0.675049
MRPL2	0.45908	-22.5771	0.675049	0.675049
HIVEP1	-0.592217	-0.886857	0.675049	0.675049
MRTFB	-1.0176	2.12721	0.675049	0.547116
WDR61	-0.473566	-24.7968	0.675049	0.675049
NT5DC1	0.557841	0.685924	0.675049	0.675049
SIRT1	-27.9102	-1.64433	0.675049	0.656057
ACOT2	-27.4449	-1.02972	0.675049	0.675049
VPS28	-25.1854	-1.12543	0.675049	0.36749
MID1IP1	-24.7592	0.209074	0.675049	0.699932
KLC2	-24.505	-24.505	0.675049	0.675049
CHCHD1	-24.49	-0.986159	0.675049	0.316713
CRTC2	-24.3575	-0.885781	0.675049	0.675049
MAP1LC3B2	-24.2794	-0.468167	0.675049	0.675049
ATP6V1F	-24.1943	-1.11435	0.675049	0.675049
CEBPG	-24.0828	-0.711204	0.675049	0.675049
PFDN1	-24.0145	-0.52072	0.675049	0.675049
TM9SF1	-24.0125	-2.41716	0.675049	0.569106
APLP2	-23.9803	-0.473993	0.675049	0.675049
LANCL2	-23.8475	-0.547771	0.675049	0.927056
ATF1	-23.7419	-23.7419	0.675049	0.675049
RNF121	-23.7071	-3.70644	0.675049	0.633342
TMEM59	-23.6161	-1.47741	0.675049	0.675049
MED9	-23.5919	-0.237546	0.675049	0.755216
CCNC	-23.5769	-1.25596	0.675049	0.344895
MITF	-23.5009	-1.84547	0.675049	0.675049
WASHC2A	-23.463	-1.73191	0.675049	0.675049
MED7	-23.4604	-0.457715	0.675049	0.675049
UBE2R2	-23.4438	-2.0987	0.675049	0.675049
CLGN	-23.4149	-1.14944	0.675049	0.675049
CCT6B	-23.4085	-23.4085	0.675049	0.675049
ARIH1	-23.3985	-3.43811	0.675049	0.675049
PPP4C	-23.3736	-1.72507	0.675049	0.675049
QSOX1	-23.363	-0.217876	0.675049	0.675049
WDR11	-23.3394	-0.666403	0.675049	1.31194
C18orf25	-23.3146	-0.742382	0.675049	0.675049
MAU2	-23.1023	0.743569	0.675049	0.675049
ING3	-23.0575	1.91195	0.675049	0.675049
RABL6	-22.9525	-0.941751	0.675049	0.314031
ZBTB16	-22.8256	-22.8256	0.675049	0.675049
SRRT	-22.7668	-22.7668	0.675049	0.675049
MET	-22.7553	-22.7553	0.675049	0.675049
MRPL46	-22.6268	-2.87176	0.675049	0.675049
RALGAPA1	-22.625	-22.625	0.675049	0.675049
DMAC2L	-22.5547	-0.700124	0.675049	0.675049
WDR75	-22.5025	-22.5025	0.675049	0.675049
WASHC3	-22.4985	-0.0326753	0.675049	0.675049
MRPL17	-22.451	-1.52563	0.675049	0.675049
MAPT	-22.4347	-0.485187	0.675049	0.396872
WASL	-22.4054	-0.166403	0.675049	0.675049
DIAPH3	-22.3581	-1.42168	0.675049	0.675049
PEX14	-22.2353	-0.843067	0.675049	0.675049
NUP85	-22.1176	-1.33497	0.675049	0.675049
RPP14	-22.1064	-0.89236	0.675049	0.385695
ELP4	-22.0963	0.210203	0.675049	0.675049
HMGCS1	-22.0846	-0.193598	0.675049	0.675049
PAXBP1	-22.0724	-22.0724	0.675049	0.675049
MMP24OS	-22.0668	-0.119785	0.675049	0.675049
WDFY1	-22.0188	-22.0188	0.675049	0.675049
MPLKIP	-22.0007	-1.50506	0.675049	0.487803
PRORP	-21.9774	-1.3675	0.675049	0.389125
BPIFC	-21.9262	4.33607	0.675049	0.675049
SDCBP	-21.9092	-21.9092	0.675049	0.675049
RFC1	-21.8441	-21.8441	0.675049	0.675049
CBWD1	-21.7823	-0.168549	0.675049	0.322369
DNAJC9	-21.7664	-21.7664	0.675049	0.675049
NDUFA2	-21.7129	-21.7129	0.675049	0.675049
CDC123	-21.7106	-0.32351	0.675049	0.675049
RUFY2	-21.7064	-0.811065	0.675049	0.400614
NDUFS8	-21.7042	-21.7042	0.675049	0.675049
ALDH4A1	-21.6952	-21.6952	0.675049	0.675049
THEM4	-21.6411	-1.12579	0.675049	0.675049
LIN37	-21.568	-21.568	0.675049	0.675049
ASCC2	-21.5668	1.12153	0.675049	0.675049
CIAPIN1	-21.5641	-1.03172	0.675049	0.308121
ATP6V1D	-21.5172	-21.5172	0.675049	0.675049
ATF2	-21.4942	1.20854	0.675049	0.637818
RRP15	-21.4317	-21.4317	0.675049	0.675049
LPIN1	-21.4178	-21.4178	0.675049	0.675049
FLAD1	-21.3743	-0.713808	0.675049	0.675049
COX5A	-21.3478	-21.3478	0.675049	0.675049
SS18L1	-21.2779	-21.2779	0.675049	0.675049
SLC38A2	-21.2501	-0.196285	0.675049	0.675049
CEP43	-21.1251	0.838114	0.675049	1.01583
UBE2O	-21.0623	0.0986436	0.675049	0.494434
KLF4	-21.0546	-21.0546	0.675049	0.675049
VCPIP1	-21.0373	-21.0373	0.675049	0.675049
METTL26	-21.0329	-21.0329	0.675049	0.675049
PNPLA8	-21.0312	-4.42981	0.675049	0.675049
S100A7A	-20.9932	2.88151	0.675049	0.675049
BTF3L4	-20.9499	2.17938	0.675049	0.675049
PTPA	-20.9254	-20.9254	0.675049	0.675049
TPM2	-20.8283	2.41224	0.675049	0.675049
MED31	-20.8216	1.03144	0.675049	0.430743
YWHAH	-20.7775	-20.7775	0.675049	0.675049
DMTN	-20.764	-20.764	0.675049	0.675049
CTCF	-20.6694	-20.6694	0.675049	0.675049
MRPL50	-20.6581	2.8044	0.675049	0.675049
ENSA	-20.5506	1.472	0.675049	0.675049
WDR44	-20.5149	-20.5149	0.675049	0.675049
FLT1	-20.5049	1.1667	0.675049	0.447752
POLD3	-20.3806	-20.3806	0.675049	0.675049
WDR7	-20.3717	-20.3717	0.675049	0.675049
KIF22	-20.2086	0.267987	0.675049	0.342068
PPA1	-20.1874	0.702883	0.675049	0.675049
SCAI	-20.1749	-20.1749	0.675049	0.675049
HLA-A	-20.1507	-20.1507	0.675049	0.675049
MYO1E	-20.1462	-20.1462	0.675049	0.675049
NANP	-20.1336	-20.1336	0.675049	0.675049
HAUS6	-20.1325	2.6244	0.675049	0.586826
RALGAPB	-20.1109	1.40648	0.675049	0.743338
EFL1	-20.0986	-20.0986	0.675049	0.675049
POP5	-20.0937	-20.0937	0.675049	0.675049
RC3H1	-20.0607	-20.0607	0.675049	0.675049
ITSN2	-20.0004	-20.0004	0.675049	0.675049
EIF2B1	-19.9711	-19.9711	0.675049	0.675049
DNAJC1	-19.9165	-19.9165	0.675049	0.675049
VPS33B	-19.8954	2.00575	0.675049	0.675049
RFC3	-19.74	-19.74	0.675049	0.675049
KIF1A	-19.6473	-19.6473	0.675049	0.675049
NDUFA7	-19.6338	-19.6338	0.675049	0.675049
C9orf72	-19.5989	-19.5989	0.675049	0.675049
PPFIBP1	-19.5974	-19.5974	0.675049	0.675049
NDC1	-19.5969	-0.100387	0.675049	0.675049
DTD1	-19.5846	2.39095	0.675049	0.566779
STK3	-19.2823	0.317387	0.675049	0.992347
UBXN4	-19.2698	-19.2698	0.675049	0.675049
FHIP1A	-19.2613	-19.2613	0.675049	0.675049
C1orf52	-19.1457	-19.1457	0.675049	0.675049
AAR2	-19.0556	1.74866	0.675049	0.513641
DYNC1I2	-19.0257	-19.0257	0.675049	0.675049
USP28	-18.9337	-18.9337	0.675049	0.675049
ITPRID2	-18.8351	-18.8351	0.675049	0.675049
TNRC6C	-18.5809	1.26084	0.675049	0.675049
GPKOW	-18.4446	0.81271	0.675049	0.675049
CDKN1A	-17.9657	-17.9657	0.675049	0.675049
PIK3C3	-17.7959	-17.7959	0.675049	0.675049
RNF113A	-6.6931	-0.0953701	0.675049	0.675049
UBE2Q1	-5.32765	-2.12236	0.675049	0.523882
SDF2L1	-4.32517	-0.889643	0.675049	1.20509
CDV3	-4.15033	-1.26359	0.675049	0.675049
EXOSC6	-3.18288	-2.05703	0.675049	0.544067
ARFGAP1	-2.91176	-22.3828	0.675049	0.749417
INVS	-2.8482	-3.38894	0.675049	0.675049
RGPD1	-2.56155	-5.19501	0.675049	0.766687
ATF7	-2.48998	-1.32698	0.675049	0.675049
SENP6	-2.38587	-1.5142	0.675049	0.675049
SLC39A10	-2.16671	-1.04789	0.675049	0.675049
ATP6V1E1	-2.13415	0.387259	0.675049	0.703293
CAST	-2.00463	0.264845	0.675049	0.675049
SEPHS1	-1.94217	-0.108829	0.675049	0.675049
STRN4	-1.74316	-1.37301	0.675049	0.388202
CAPN7	-1.62004	-1.84861	0.675049	0.675049
PI4KA	-1.59998	-2.60515	0.675049	0.675049
ZNF451	-1.50805	-2.93312	0.675049	0.606383
TVP23B	-1.39466	-0.686449	0.675049	0.675049
KIAA1671	-1.30184	-20.1735	0.675049	0.675049
AKT1	-1.23135	-2.9579	0.675049	0.675049
YY1	-1.18231	-2.21568	0.675049	0.675049
EFCAB5	-1.03918	-0.93056	0.675049	0.675049
TC2N	-0.992365	-22.0248	0.675049	0.675049
DPYSL3	-0.897558	-0.426808	0.675049	0.675049
CUL4A	-0.838509	-1.69014	0.675049	1.06342
YARS2	-0.804377	-1.66209	0.675049	0.675049
ARFGEF2	-0.801819	-2.23249	0.675049	0.675049
TAF6L	-0.77719	-2.63217	0.675049	0.675049
STAT2	-0.764723	0.287378	0.675049	0.675049
STAG2	-0.667539	-0.683729	0.675049	0.675049
ZBTB34	-0.630151	-0.563399	0.675049	0.675049
GTF2A2	-0.569474	-0.623495	0.675049	0.629162
SNX6	-0.556054	-0.662611	0.675049	0.725567
NAA15	-0.492498	-0.110099	0.675049	0.675049
NUDT16L1	-0.419164	-0.26949	0.675049	0.675049
SSBP1	-0.411433	3.09783	0.675049	0.757519
TM9SF2	-0.398106	0.417988	0.675049	0.675049
NIP7	-0.368219	-0.46194	0.675049	0.675049
USP16	-0.313292	-1.04029	0.675049	0.675049
GNA11	-0.275259	-2.12877	0.675049	0.675049
MSN	-0.220655	-0.489271	0.675049	0.675049
NSUN2	-0.198545	-0.387551	0.675049	0.478555
DPF1	-0.068435	-0.0659744	0.675049	0.675049
AHSA1	-0.0659829	-0.236904	0.675049	0.751186
FOCAD	0.155271	-0.107476	0.675049	0.675049
SFXN2	0.367908	0.0324223	0.675049	0.675049
RABGAP1	0.464675	-19.4537	0.675049	0.675049
PANK4	0.522967	0.114164	0.675049	0.675049
SLC30A6	0.550386	0.00789428	0.675049	0.824112
CYB561	0.56457	0.395857	0.675049	0.675049
PCYT2	0.743173	0.0672836	0.675049	0.675049
SCAMP1	1.04655	-1.14262	0.675049	0.336605
TBRG4	1.05215	-0.800596	0.675049	0.675049
TBC1D4	1.18598	-18.7216	0.675049	0.675049
NKTR	1.32379	-0.098899	0.675049	0.675049
HGS	1.35301	1.48118	0.675049	0.48978
SWAP70	1.36741	-20.3403	0.675049	0.675049
SPAG5	2.83469	2.57097	0.675049	0.579713
ACBD3	3.76631	-20.0567	0.675049	0.675049
CHMP5	4.73466	-19.9503	0.675049	0.675049
SETDB1	19.4446	0	0.675049	#DIV/0!
LYRM1	19.7583	0	0.675049	#DIV/0!
MOCS2	19.8693	0	0.675049	#DIV/0!
GCC2	20.0853	0	0.675049	#DIV/0!
ATP6V0D1	20.1988	20.4559	0.675049	0.675049
AGO1	20.3159	0	0.675049	#DIV/0!
PRUNE1	20.4144	0	0.675049	#DIV/0!
LTV1	20.8034	23.467	0.675049	0.715893
DDX10	20.9193	0	0.675049	#DIV/0!
PATL1	21.0119	0	0.675049	#DIV/0!
ARHGAP29	21.0552	0	0.675049	#DIV/0!
MUS81	21.0826	0	0.675049	#DIV/0!
TSC22D1	21.1888	0	0.675049	#DIV/0!
SAP30BP	21.2255	0	0.675049	#DIV/0!
MRPL42	21.7853	0	0.675049	#DIV/0!
GAPVD1	21.8482	0	0.675049	#DIV/0!
POLA1	21.94	0	0.675049	#DIV/0!
SERPINB4	22.4805	23.4696	0.675049	0.746604
C19orf25	22.5046	0	0.675049	#DIV/0!
FOXO3	22.6545	0	0.675049	#DIV/0!
TMEM179B	23.062	0	0.675049	#DIV/0!
PHC1	23.6616	22.5479	0.675049	0.675049
CERS2	23.837	0	0.675049	#DIV/0!
RHD	24.0237	0	0.675049	#DIV/0!
REV3L	24.3709	0	0.675049	#DIV/0!
CDK7	26.389	0	0.675049	#DIV/0!
DLG1	-22.5504	-22.5504	0.675049	0.675049
UBAP1	-22.4585	-22.4585	0.675049	0.675049
NCOA7	-22.3089	-0.461641	0.675049	0.675049
TRIR	-21.5876	-21.5876	0.675049	0.675049
DPM3	-21.4469	-0.563483	0.675049	0.675049
CTTNBP2NL	-21.3162	-21.3162	0.675049	0.675049
WIPF2	-21.3052	-0.291453	0.675049	0.675049
C5orf24	-21.2852	-21.2852	0.675049	0.675049
PUS7	-20.6134	-20.6134	0.675049	0.675049
SEPTIN6	-20.5989	-20.5989	0.675049	0.675049
BET1	-20.3302	1.28782	0.675049	0.675049
ERAL1	-20.3256	1.27838	0.675049	0.675049
GPHN	-20.2875	-20.2875	0.675049	0.675049
ITGB1	-20.286	-20.286	0.675049	0.675049
VPS8	-19.6691	-19.6691	0.675049	0.675049
HINT3	-4.38723	-1.79826	0.675049	0.54725
ASPH	-3.12854	-0.836055	0.675049	0.409853
ZHX3	-1.98691	-1.88453	0.675049	0.675049
TRAPPC8	-1.65282	-21.6019	0.675049	0.675049
STX5	-1.18623	-0.687553	0.675049	0.675049
BCS1L	-1.02655	0.916253	0.675049	0.675049
NF2	-0.981373	-22.3131	0.675049	0.675049
NT5C2	-0.699929	-0.951291	0.675049	1.07052
DFFA	-0.668297	-1.78919	0.675049	0.675049
PTPN23	-0.533961	-0.663549	0.675049	0.675049
NOL10	-0.43741	-0.36414	0.675049	0.675049
GPATCH8	-0.405545	-0.473803	0.675049	0.675049
EXPH5	0.458568	-19.7207	0.675049	0.675049
INIP	0.618112	-0.467972	0.675049	0.675049
NFS1	0.645491	0.753912	0.675049	0.675049
RPL37	1.08868	-0.162474	0.675049	0.675049
PURB	1.63842	-20.33	0.675049	0.675049
ZRSR2P1	1.68728	-1.36784	0.675049	0.675049
RAB3IL1	1.90854	-19.8806	0.675049	0.675049
EPB41L4B	20.599	0	0.675049	#DIV/0!
SMCR8	20.6449	19.8593	0.675049	0.675049
CDCA2	21.445	0	0.675049	#DIV/0!
PRPF18	21.5888	0	0.675049	#DIV/0!
EHBP1	22.3013	0	0.675049	#DIV/0!
NDUFB10	-0.578456	-1.34657	0.675049	0.675049
KRI1	-0.329534	-20.2312	0.675049	0.675049
YIPF3	-0.70168	-0.479459	0.675049	0.675049
MARCKS	0.443624	-0.410987	0.675049	0.974134
SBNO2	-0.534475	0.202465	0.675049	0.675049
NDRG2	-0.317013	-21.8423	0.675049	0.675049
FAM114A1	-0.298442	2.01459	0.675049	0.675049
TAOK3	0.179124	-0.0677834	0.675049	0.675049
TRIM61	0.540543	0.882756	0.675049	0.675049
ARHGAP32	-0.440031	-1.03721	0.675049	0.675049
HERC2	-0.15244	-0.712641	0.675049	0.675049
RHOT2	0.200031	-0.81784	0.675049	0.675049
ERGIC2	0.35142	-0.797559	0.675049	0.675049
TPX2	-0.138118	-0.320505	0.675049	0.675049
NSD1	0.125374	-0.988533	0.675049	0.675049
TNPO3	-0.101282	-20.6389	0.675049	0.675049
SLC25A17	0.0971489	-0.434496	0.675049	0.675049
ELMOD2	0.109767	-0.829035	0.675049	0.675049
CAMSAP3	-6.9945	0.801994	0.674938	0.671381
RBM47	-1.00522	-1.92304	0.6746	1.20879
TUBB6	4.55135	1.31834	0.674543	0.693117
RBBP4	-2.14117	0.651848	0.674349	0.886079
PTBP3	0.180758	-0.0172039	0.674345	1.31548
MED10	-2.77037	0.597965	0.674137	0.40273
RPL18	0.244049	0.110997	0.674023	0.402505
ZBTB10	-0.947014	-0.804521	0.673974	1.22052
YWHAG	0.0866412	-1.64514	0.673784	1.02611
TRRAP	5.57668	-0.575874	0.673276	0.842722
TFAM	-1.77952	-0.971222	0.673137	0.638093
HNRNPC	0.265286	-0.19525	0.672729	1.07328
RAP1A	-1.45458	-1.82656	0.672438	0.717268
ERH	-0.583245	0.185208	0.672431	0.3637
TSNAX	-7.63306	-28.3507	0.672086	0.675049
CASP14	1.03746	2.58279	0.671898	0.675049
PSMC6	-0.563715	-0.741398	0.671798	0.785957
TFAP2C	-1.2406	-0.150972	0.671346	0.550831
HNRNPLL	0.450503	0.0014588	0.670818	1.00659
PHKB	-0.618736	-1.59518	0.670663	1.46045
DYNC1LI2	-0.844604	-1.07996	0.670598	1.48053
ZC3H18	-0.530447	-1.80704	0.670581	0.793713
ZNF830	-6.9789	-2.14702	0.670406	0.622256
CRYBG1	-0.595067	-0.342337	0.6703	0.493027
RPL26	-0.213044	0.467699	0.670237	0.694933
MRPS27	-0.873244	-0.049297	0.669906	0.43782
RBBP7	-2.63209	0.30872	0.669898	0.628864
MCM3AP	-0.395068	0.0217709	0.669709	0.33588
BABAM1	-6.76621	-2.06911	0.669597	0.611056
IK	-0.964319	-0.285447	0.668359	0.974993
YAF2	-2.98079	-1.0276	0.668166	0.552348
TRIM24	-0.653921	-0.820401	0.668103	1.21637
AKAP8	-0.497785	-0.699717	0.667792	1.99626
GTF2I	-0.943345	-1.25868	0.667417	1.21834
ZNF644	0.121746	-0.0464548	0.666741	0.637936
DSTN	-0.4996	-1.19696	0.666603	0.900679
ABRAXAS2	-0.424094	-0.581589	0.666527	0.613411
RPS16	0.115644	0.305294	0.666085	0.467056
PPP2R2A	-1.59506	-0.412725	0.66598	0.792467
GPATCH4	1.10981	1.35483	0.665978	0.620253
POLDIP2	0.433218	-0.0791101	0.66363	0.357686
ARHGAP35	2.13519	-2.51686	0.663395	0.70351
ISG15	-0.645889	0.0506895	0.662849	0.323716
UQCRC1	0.577744	0.614972	0.66227	0.571121
PDCD4	-1.59243	0.266331	0.661776	0.385522
SEC22B	-0.613474	-0.781764	0.661626	0.795107
PTGR1	0.798813	1.40778	0.661351	0.488812
INTS2	3.52693	-0.532192	0.66113	0.675049
SPEN	-1.18381	-0.213665	0.661045	0.653592
U2AF1	-2.21273	0.270579	0.659171	0.451865
RBBP6	-0.982777	-0.579688	0.659023	0.912225
ELP1	5.10036	-21.0005	0.657846	0.675049
SFN	-5.10107	-0.926539	0.657703	0.675049
YWHAQ	-0.1078	-0.993693	0.657604	0.956939
ABHD10	-0.965718	-2.89475	0.656752	0.778801
SLC3A2	-1.16732	-0.871069	0.656486	1.07464
COMMD10	4.14294	-3.23543	0.654875	0.852832
PFKL	-0.306965	-0.525944	0.654735	0.92868
CPEB4	-4.85253	-1.01442	0.654432	0.364778
PPIA	0.358544	-0.649443	0.654079	0.677541
UBE2I	-0.437761	-0.430663	0.654079	0.866925
PPIE	-4.41438	1.00826	0.654074	1.0333
CTTN	-0.389987	-0.687176	0.652411	0.948781
ELOB	-0.877703	-1.14085	0.651881	0.808569
BABAM2	-0.529498	-0.310074	0.651668	0.488887
NUP205	-0.694591	-1.57074	0.651543	1.09459
STAT1	-0.878706	-0.651645	0.65146	0.656609
GNAS	-0.257008	0.749069	0.650542	0.39902
YBX1	1.67133	-0.267939	0.650105	0.622246
CPSF6	-0.385736	-0.530095	0.649577	1.31
MRPL22	-0.687054	0.586595	0.648925	0.654735
SNRPE	-0.369881	-0.365879	0.648187	0.990116
PRPSAP2	1.33705	0.961857	0.647683	1.2336
SMPD4	1.7387	1.5339	0.647633	0.634161
PLPP6	-0.551286	-0.221207	0.647585	0.52317
DDX19A	-0.547269	-0.196877	0.647526	1.40672
AP3S1	-0.546425	-2.04358	0.647512	0.833007
HELLS	0.364016	0.0768548	0.647341	0.358743
KRTCAP2	4.41013	4.13908	0.64696	0.641128
CACTIN	0.633039	-0.723859	0.646406	0.393043
MRPL38	-0.335265	0.145205	0.646173	0.393545
CRYL1	0.75745	0.611219	0.645716	0.824112
BTF3	-0.0739399	0.148887	0.645698	0.486465
HSD3B7	1.1772	0.799832	0.645698	0.704941
BCAS2	-0.939301	-1.6755	0.645561	0.957721
LARP4	-0.359234	-1.76533	0.645275	1.15558
BSG	-2.83948	-1.37033	0.644908	0.498261
AQR	-3.96712	0.778341	0.644729	0.80529
TMEM33	0.257705	-0.232342	0.644195	0.775884
RPL28	0.172724	-0.0440039	0.643777	0.412545
CALR	-0.781477	-0.297225	0.643766	0.589491
VPS26B	0.226118	1.26489	0.643559	1.81716
CORO1C	0.849917	-0.431654	0.643517	0.613373
NKX3-1	-0.861235	-1.49986	0.642904	2.68922
TBL1X	-2.25315	0.612484	0.642784	0.62889
HSD17B10	0.176033	-0.882818	0.642381	0.860231
ATP5MF	0.783908	0.238387	0.641245	0.524157
SEC31A	0.277898	-1.64297	0.641142	3.15569
SRSF6	0.606702	-0.291137	0.641111	0.632606
IPO7	-0.686282	-1.24726	0.640827	0.758561
RBM14	-0.755836	-1.07441	0.640672	1.02772
ZNF362	-0.661432	-0.384849	0.639371	0.757984
MRPL32	-0.857946	-1.02848	0.638843	0.684492
HIGD1A	-1.12015	0.686297	0.638518	0.392072
PXN	-0.440584	-0.785914	0.638472	0.426789
TMF1	1.9545	-0.414733	0.638314	0.517745
FASTKD5	-1.14285	-1.02834	0.638066	0.663897
SPTLC1	-0.340241	0.0746288	0.637687	0.58116
SCAMP3	1.37561	1.34489	0.637575	0.522163
LRSAM1	-1.56456	-0.444412	0.637547	1.01602
H1-4	1.51392	0.113987	0.637131	0.918047
AKAP8L	-0.849304	-0.559894	0.636612	0.830714
SNRPA	-0.193465	-0.68652	0.636552	0.85688
RAI1	-0.599583	-0.771054	0.636363	1.16548
SERBP1	0.127713	0.62308	0.635893	0.600973
NDRG1	-0.0634764	-1.22508	0.635743	0.88712
RNF169	-0.870178	-1.82832	0.635684	0.693711
LAMTOR5	-0.276682	-0.453781	0.635389	2.654
APEH	0.57382	0.20945	0.635209	0.952533
HADH	-1.85704	-2.81464	0.634878	0.678761
CIZ1	0.0717494	-21.4426	0.634755	1.03709
LRPPRC	-0.473562	-1.03401	0.634309	0.773342
CISD3	0.534906	0.175349	0.634061	1.02483
BCL7A	-0.352724	0.0687938	0.633976	0.321417
ARFGAP3	0.583333	-2.05656	0.633433	0.809742
TMED10	0.615022	0.649307	0.632522	0.595921
MYL12A	-0.697285	0.0179726	0.631471	0.358158
RAB2A	0.516194	-0.194669	0.631461	0.360894
HNRNPU	-0.40026	-0.673475	0.63119	1.17273
GOLGB1	-1.3265	-1.66944	0.630199	0.781726
PON2	-0.476893	0.350866	0.628972	0.672056
TUBB2B	-3.26332	-1.50112	0.627903	0.496558
PUM1	-0.4994	-0.823275	0.627579	1.06127
HIPK2	-0.867456	-0.679444	0.627467	1.3341
ISY1	-3.65143	-0.482557	0.627223	0.633342
TTF2	5.07844	5.18839	0.626724	0.629207
LCP1	-0.290522	0.717126	0.626545	0.613107
ABCB7	-0.140054	0.0491932	0.626323	0.975311
DDX3X	0.461395	0.16967	0.626245	0.485475
TBCD	-1.23413	-1.00314	0.62577	0.630199
RPL22L1	0.332895	0.700428	0.625454	0.940302
LSM14B	-0.495019	-0.544399	0.625391	0.819726
YEATS4	-3.48447	-1.02546	0.623761	0.308558
CKAP4	-0.642545	-0.0760116	0.623365	0.356142
BRD7	-1.25705	-0.137029	0.622955	0.554358
TXNDC9	-2.87126	-0.15165	0.622662	0.326174
AHCYL1	0.59568	-0.466017	0.622279	1.18981
MRPS15	-2.3996	-1.36984	0.619463	0.562409
MFAP1	-1.08027	0.272965	0.619038	1.12767
RPL27	0.247335	0.273023	0.619038	0.576923
COPE	-0.437165	-0.526683	0.617966	1.13289
U2AF2	-1.03631	0.673979	0.617176	0.591697
PPP2CA	-3.31811	-1.69438	0.617116	0.561354
FAU	0.488383	0.0586683	0.616448	0.377943
USP54	-0.179066	-0.226128	0.615234	0.849672
DHFR	0.0585928	-0.291772	0.614744	0.542119
TPT1	1.00989	0.468037	0.614716	0.662201
FAM120A	-0.608637	-1.05324	0.614124	1.13245
RER1	-0.432947	-0.366823	0.613994	0.676396
VBP1	-1.196	-2.03137	0.613946	0.916039
METTL7A	0.0827991	-0.599705	0.613672	0.975618
TBX1	-0.441399	-0.683399	0.613112	1.00253
FYTTD1	-0.14895	0.0413148	0.612799	0.675049
TRIM25	-0.546872	0.0688124	0.612586	0.357265
MACROD1	0.450403	0.64265	0.612113	0.94807
PRPF6	-1.89564	0.139605	0.611358	0.361513
HSPD1	-0.455092	1.21712	0.611326	0.654939
ABRAXAS1	0.0891518	-0.75988	0.610888	0.775222
SMARCC1	-0.423316	0.16	0.610779	0.404271
HMGB1	-0.459087	-0.800032	0.61063	1.10606
PTPN11	-0.428272	0.584102	0.610163	0.927056
CMAS	2.8218	0.566987	0.610146	0.929499
NFRKB	-1.09349	-1.66281	0.609676	1.11017
AP1M1	0.203661	-0.0633259	0.609483	0.992692
AAAS	0.218032	-0.736936	0.608852	1.65798
NDUFA13	0.940284	0.733181	0.60799	0.610747
NDUFS1	-0.549268	-0.716125	0.607757	0.800225
LRRC47	-4.42144	-1.26469	0.607525	0.411617
HELZ	-0.999627	-0.339116	0.607404	0.554869
DIP2B	0.0710863	-20.6025	0.607248	1.03364
HNRNPK	-0.427817	-0.802561	0.607165	1.522
NUP214	-0.452344	0.0490378	0.60636	0.675049
FAM162A	-0.827605	0.197794	0.606102	0.4602
ANXA11	0.969784	-21.3011	0.605139	1.10818
MIER1	-0.807372	-0.719955	0.60476	1.70983
TNKS1BP1	-0.433686	-0.592626	0.604424	0.797967
CUL4B	-0.53485	-1.06066	0.604365	1.04572
SPCS3	3.00202	-22.1967	0.604237	0.675049
PBRM1	-0.662362	-0.0392252	0.604175	0.331034
ZNF384	-0.66866	-0.370075	0.604096	0.940578
LYAR	-2.13907	-1.57148	0.603592	0.766176
LBR	-0.444152	-0.0232437	0.603324	0.308612
SEC63	-0.453782	-0.695654	0.603028	0.880958
NADK2	-2.48823	-0.0102496	0.602865	0.77636
PRDX2	-0.664254	-0.449518	0.602806	0.517523
PRDX1	-0.216591	-0.958432	0.602786	0.879355
MRPL37	1.45356	0.773756	0.602379	0.3627
PTAR1	0.0722362	-1.42515	0.601688	0.849154
TCOF1	-1.56286	-0.568247	0.601495	0.902978
DCD	0.942377	0.69351	0.601404	0.346958
UBE2E1	0.126983	-0.977881	0.600547	0.562972
SNRPG	-0.350337	-0.438176	0.600466	2.02818
SNX2	2.29262	0.369779	0.600378	0.5331
PRMT1	-0.348774	-0.173978	0.599462	0.665584
CUL5	-0.574994	-0.700628	0.599212	0.615538
RHEB	-0.349442	-2.81409	0.598873	0.583269
PPME1	-0.718032	-1.26717	0.598294	1.17386
NF1	-1.23326	-1.67825	0.598281	0.942755
IMPDH2	-0.255072	-0.560086	0.598122	0.822283
HAX1	0.565177	0.675324	0.597279	0.946617
C15orf39	0.183124	-0.157125	0.597014	1.19101
MGST3	2.47097	1.29864	0.596966	0.753128
TJP2	0.710519	-0.426578	0.596144	1.44002
PRPF19	-0.370386	-0.404767	0.595735	0.799319
ASS1	1.31708	-20.5789	0.595564	0.675049
PIAS1	0.405267	-0.459012	0.59447	1.0952
ANP32B	-1.74814	-0.669834	0.593762	0.430533
CAPN1	-0.464975	-0.892971	0.593666	1.26702
RINT1	-0.494292	-20.1306	0.593373	0.91862
RBM39	-0.281379	0.20867	0.593336	0.463953
PDS5B	-1.39292	-2.2101	0.592308	0.644088
GLUL	1.72373	2.39858	0.591917	0.440207
PSMD14	0.665257	-0.28288	0.59174	1.25755
PELO	0.565225	0.628117	0.591606	0.502148
MRPL12	-0.986502	-1.05061	0.591579	0.598262
DERL1	2.71495	0.73608	0.5913	0.990522
CDK8	2.22501	-0.296672	0.591087	0.374252
ATP5F1D	-0.111734	-0.503261	0.590552	1.51407
YWHAB	-0.581315	-1.6496	0.590518	1.15257
RTRAF	-0.0896409	0.150573	0.590518	0.516455
PRDX3	-0.292508	-0.197984	0.590245	0.475634
ARID1A	-0.202834	-0.252134	0.589781	0.701654
DCP1A	0.207603	-0.733942	0.589491	1.11056
ATXN10	-2.82638	-2.56829	0.589491	0.675049
LCLAT1	1.0652	-1.0688	0.589491	0.782867
OCIAD2	0.221948	0.517201	0.589491	0.648925
POF1B	1.2066	0.726583	0.589345	1.74294
MTCH2	-0.502958	0.654492	0.588975	0.611836
ACOX1	-0.502963	1.268	0.588908	0.404899
EXOSC2	-0.202907	0.0141666	0.588446	0.303845
PSMD11	0.10301	-0.833714	0.588422	0.98482
CEP97	0.996495	-0.46104	0.58714	0.981293
LGALS7; LGALS7B	2.66033	2.81974	0.586982	0.562972
KDELR1	1.15228	0.719107	0.586769	0.955846
GPX1	-1.48313	-1.06799	0.585989	1.01956
NFAT5	-0.434904	-0.30382	0.585806	0.477223
DRG2	-0.117365	-0.620851	0.585663	0.799681
TRERF1	-0.500049	-0.655869	0.58499	0.745306
RANBP3	-0.574119	-1.97922	0.583731	1.73528
KIDINS220	2.61373	-20.4399	0.583601	0.675049
NUP35	-2.56222	-22.5628	0.583402	0.675049
PPP6R3	-0.333336	-0.731217	0.583347	1.24674
MRPL48	-0.995099	0.0527966	0.580991	0.420769
PPIL2	0.280886	0.165174	0.580872	0.608111
MCCC1	-0.233942	0.0391604	0.580523	0.504139
MSMO1	0.39189	-0.479301	0.580523	0.592813
TARDBP	-0.503316	-1.11727	0.580523	0.940669
RPS20	0.222802	0.400933	0.577907	0.82407
HNRNPA3	-0.111565	-0.173939	0.577907	1.24735
SCAF11	-0.072972	0.536839	0.576693	0.979569
SQOR	-0.956165	-0.969231	0.576663	0.903923
MAGOHB	-0.625285	0.694976	0.575473	0.636638
BCL6	-0.510053	0.70398	0.57525	0.931674
HYOU1	0.793551	0.088949	0.5752	0.367005
FHIP2A	-0.462375	-20.6886	0.574241	1.00893
ZFHX3	-0.455512	-0.545234	0.573863	1.87654
CDC27	-2.51564	-2.15332	0.573266	0.675049
AGK	0.0701128	1.00258	0.572807	0.318233
SDF2	-2.48895	-0.383279	0.57248	1.03173
PSMB5	-0.227554	-0.604575	0.57248	0.658786
SHMT1	0.703056	0.0620432	0.57248	0.855423
CHCHD4	1.14609	0.458828	0.571254	1.53202
ACADSB	-0.204132	-0.43101	0.570707	1.53612
TPI1	-2.40236	-1.00431	0.570255	0.675049
NAA50	1.5418	0.790357	0.570098	0.597971
NAP1L1	-0.325704	-0.303897	0.570002	1.05972
MTHFD1	-0.360088	-0.0297894	0.569393	0.319086
KTN1	-0.563251	-0.0523707	0.568923	0.35769
FLYWCH2	-0.0326701	-0.524349	0.568629	0.959881
PIK3CD	-0.018943	0.521965	0.568579	0.832776
AKAP13	0.0551887	1.13655	0.567644	0.589491
PPP1R12A	0.468288	-0.659716	0.567379	0.336893
CYFIP1	-0.645772	-1.42721	0.567363	1.01522
CBR1	1.36209	0.481288	0.567123	0.377415
SRPRA	-0.460627	-1.5714	0.566863	0.94923
VIM	1.66768	-23.2061	0.56644	0.783915
L2HGDH	-0.622984	-1.94193	0.566327	0.675049
POLR2M	-1.77546	-3.33187	0.566297	0.752066
CBX4	-0.359244	0.584687	0.565031	1.15734
AAK1	-0.442561	-0.803111	0.564756	0.818857
TMED5	-2.17569	-0.948326	0.564703	0.935726
DDC	0.638913	1.67146	0.564002	0.525725
LARP1	-0.328781	0.0707678	0.563254	0.344036
ASCC3	-0.291599	-0.422866	0.563098	1.62696
TUBA1C	-2.35426	-0.827446	0.562972	0.675049
SMARCA2	-0.651579	0.304395	0.562721	0.517145
MRPL3	-0.376627	0.438498	0.561836	0.445743
ARID2	-0.640286	-0.472522	0.561742	0.530526
NLRP2	-0.331001	-1.09036	0.561698	0.600843
MBOAT7	0.105069	0.435008	0.561327	0.813042
STEAP1	-0.166292	0.0361189	0.561327	0.306651
COG4	-0.488937	1.54594	0.560859	0.380707
ACADVL	-0.489971	-1.14364	0.560758	0.941761
KRT18	-0.37222	0.0529026	0.560746	0.340519
RRBP1	-0.598812	0.291005	0.560625	1.32891
DKC1	-0.687908	-1.99036	0.560472	1.11419
ECH1	-0.737043	-1.52472	0.560397	0.848694
RAB7A	-0.783179	-2.35352	0.560258	0.953015
LRRFIP2	0.82427	0.623851	0.559613	1.31194
ADRM1	0.513003	-0.439961	0.559351	0.774911
ABI1	0.707314	-0.0541602	0.559223	0.467965
ATP2B1	1.38022	0.0498873	0.558979	0.340671
DIAPH1	-0.765509	0.0464603	0.558846	0.308607
PHF5A	0.274759	-0.255211	0.558668	0.406929
TBX2	0.192822	-0.578381	0.557615	1.05741
ZNF217	-0.731087	-1.27222	0.557522	1.41341
ZC3HAV1	-0.515983	-1.31684	0.557368	1.37262
PPIL3	-0.135799	-0.400407	0.557314	0.669053
BUD31	-0.846282	-1.05825	0.557235	0.723317
SUPT5H	0.131973	-0.330713	0.556927	0.987482
LYPLAL1	-0.44886	-0.715325	0.556688	0.737175
FTSJ3	-0.633939	-2.38319	0.556664	0.779809
STAT3	-0.636492	-1.35176	0.556592	1.05848
MRPL40	-3.17469	-0.0953334	0.556182	0.675049
LSG1	1.54769	0.308425	0.555876	0.627111
PUF60	-0.329968	0.212423	0.555309	0.530984
SAMHD1	-1.03513	-1.12518	0.554984	0.62286
SNW1	-0.757302	-1.46296	0.554796	0.945881
SRPRB	-0.787461	-0.743671	0.55454	0.86281
NUP93	-0.583026	0.0143165	0.554413	0.308918
RAD50	-1.16313	0.171632	0.554387	0.345633
SHC1	-0.471857	-1.06741	0.554028	0.753082
STEEP1	-0.885644	-2.5476	0.553851	0.969942
UBE2D2	0.511426	0.202012	0.553676	0.527503
DHX36	-0.167346	0.0441613	0.553628	0.372786
RPP38	-1.24372	-1.32938	0.553141	0.762518
PRDX6	0.362036	-0.589736	0.55266	0.586488
CCT5	-1.61824	0.461784	0.55137	0.71389
RPL21	-0.248569	-0.318147	0.551085	0.675049
SYNCRIP	-0.349308	-0.715418	0.550822	0.998842
CEBPZ	-0.273303	-1.3405	0.550547	0.836782
EIF4E2	-0.491215	-0.325619	0.550352	0.514604
RUVBL2	-0.193694	-0.0899014	0.549899	0.42469
GFPT1	0.116367	-0.850418	0.549339	0.643456
ALDOA	0.518054	-0.131717	0.548576	0.370033
MTMR6	2.1455	-19.7666	0.548542	0.675049
MT-ATP8	1.2822	-0.186782	0.54839	0.396872
FDFT1	-1.22063	-0.683476	0.547918	0.561036
CEP170	1.92259	1.5593	0.547846	0.490143
XIAP	0.616912	-0.511243	0.547843	0.990063
LRCH3	0.791725	0.842723	0.547008	0.878875
DIMT1	-1.17273	-0.420271	0.546956	0.964849
EI24	2.99753	1.58212	0.546273	0.565467
RCC2	-1.45382	0.113238	0.546131	0.610315
NAA10	0.0629716	-0.495418	0.545133	1.04754
MAP4K4	0.362321	5.44042	0.543576	0.673619
PFN2	-0.549964	-0.976146	0.543384	0.624887
DMD	0.711785	0.0337351	0.543372	0.319605
DDX21	-0.43288	-0.810259	0.543136	1.09949
HMGCL	0.347579	-0.0825433	0.542379	0.350522
HMGCS2	-0.423746	-0.309506	0.541059	0.819726
SLIRP	0.793162	1.32968	0.540925	1.03406
TRAPPC9	-2.03046	-1.62404	0.540894	0.389092
ACTL6A	-0.355389	0.413006	0.540889	0.663652
WDR43	-0.591595	-2.22384	0.540543	0.771234
PICALM	0.57615	-1.05924	0.540335	0.755705
XRN1	-0.366669	-0.892932	0.540238	1.35481
EIF2A	-0.131661	0.165093	0.540148	0.396791
GOLGA3	0.395686	1.66716	0.538006	0.315918
BCL7C	-0.374332	0.460709	0.537755	0.525641
GSPT2	-0.476246	-0.340995	0.537665	0.563035
NELL1	-0.0864249	-0.63378	0.537665	0.837014
MCM3	-0.449795	-0.299943	0.537439	1.40781
MRPL19	0.175501	-0.454623	0.536442	0.699378
PRPF4B	-1.62713	-3.04316	0.536342	0.71023
ZC3H11A	-0.437261	-1.25528	0.534825	1.15392
CLPP	1.55858	-20.9028	0.534699	0.874381
TAF4	0.264999	-0.953294	0.534001	0.52274
TMED2	0.225936	0.615009	0.533214	0.620225
CS	-0.384277	-1.54515	0.532331	0.974907
RPL35A	0.217186	0.168855	0.531314	0.540925
CDK1	-0.338577	-0.651923	0.530966	0.987273
MT-ND6	0.476149	0.244267	0.530861	0.380838
TBL1XR1	-0.768065	0.430342	0.530696	0.475066
PDIA5	0.0100209	-22.1664	0.530278	1.06161
RNF214	-0.721826	-0.841552	0.530247	0.691761
BICRAL	0.258482	-1.68136	0.52996	0.775882
CRYBG3	1.90464	-0.0753132	0.529512	0.427736
COPZ1	-0.298637	-0.0840542	0.529512	0.339142
DAZAP1	-0.784731	-0.807664	0.529322	0.603568
PPFIA1	1.05071	0.0857718	0.529097	0.638433
ZNF638	-0.403981	-1.20303	0.528968	0.975238
EHF	-0.818333	-0.89792	0.528881	1.01678
SPATA2	0.307112	-0.245338	0.528876	0.549099
DNAJC13	0.258243	-0.490504	0.52827	0.957969
ILKAP	-0.361964	-0.444019	0.52773	1.36805
LIMA1	-0.509723	-1.69635	0.527708	0.92245
PKN2	0.202696	-0.202998	0.527515	0.932292
NIBAN2	-0.347953	-1.41204	0.527362	0.672415
TACO1	-0.856625	0.163402	0.527332	1.02572
RANGAP1	-1.13659	0.404868	0.527163	0.513643
GULP1	-0.22779	-0.507653	0.527054	0.797735
ARID5B	-0.576788	-1.16507	0.526852	1.2736
LUC7L3	-1.00673	-1.2267	0.526457	0.753904
GNAI3	-0.214103	-0.627994	0.525789	0.97569
SCYL1	-1.08651	1.05119	0.525291	0.345478
RNMT	0.796395	0.346714	0.525275	0.998318
NECAP2	-0.666026	-22.3623	0.52514	1.03606
RPL27A	0.275706	-0.075151	0.524616	0.48083
ACSL1	0.397553	-1.01372	0.524455	0.565231
CLNS1A	-0.751966	-0.0783703	0.524157	0.363628
DSG1	0.867637	-0.233654	0.524157	0.40902
ARPC1A	1.39493	1.22265	0.52406	0.446055
PPAT	1.02977	-1.12284	0.523094	0.876876
CNOT1	-1.58411	-4.02387	0.522661	0.685928
BAIAP2	-0.304385	-0.496317	0.522316	0.833486
ATPAF1	-0.333202	0.00557941	0.5223	1.34398
LARS1	-0.305018	-0.775963	0.522136	1.41808
RELA	0.544963	0.894315	0.522076	0.543333
USP39	-1.80316	-0.63994	0.5215	0.323059
SRP72	-0.722608	-1.49462	0.521499	0.909075
YTHDC1	-0.385254	-1.38607	0.521482	1.00986
NACA	-0.280859	-0.179267	0.521233	0.757796
PHF12	-0.0428299	0.28973	0.520371	0.848502
USP9X	-0.410179	0.254911	0.520266	1.10782
ANK3	-0.245954	-0.0139154	0.520205	0.306383
ATL3	-0.339722	-0.754086	0.520178	0.938817
XAB2	-0.248802	-0.352043	0.520105	1.47586
ARL6IP4	-0.00848896	-0.629859	0.519726	0.603174
AKT2	-0.016552	-0.930963	0.518866	0.681654
CDC5L	-0.396335	-0.672587	0.518863	0.895309
WDR3	-0.67806	-1.02082	0.518848	1.00038
RNH1	-1.81716	-22.984	0.51874	0.675049
EIF3B	-0.259345	-0.49283	0.517919	0.811916
RPS11	0.270011	-0.161994	0.517627	0.468267
CCT3	-1.36975	0.328451	0.517564	0.449836
NAPA	0.294602	-0.865423	0.517554	0.371456
SRSF8	-1.10878	-0.459143	0.51749	0.57783
SNRPF	-0.904257	-0.860079	0.5174	0.508576
TUBB4B	-0.0654725	0.106511	0.516854	0.349815
AK3	-0.345821	-0.921876	0.516252	0.797963
SEC61A1	-0.143262	-0.538681	0.516027	1.02301
ACTR3	0.346386	0.447098	0.515912	0.691933
MBD2	-1.23607	-0.210036	0.515712	0.611339
CFL1	-0.77748	-1.6169	0.51495	0.708868
NRBP1	1.49186	0.458574	0.514906	0.612959
TAF7	1.07407	-0.0373283	0.514732	0.714612
SMARCC2	-0.211366	0.298356	0.514547	0.585219
FOLH1	0.188857	0.284254	0.51428	0.533176
SLC35F6	-0.14098	-0.575425	0.513741	1.25429
BPTF	0.113715	0.759168	0.513641	0.41989
TUBA4A	0.037086	0.284155	0.513641	0.460794
CCT6A	-1.27748	0.30813	0.513123	0.430735
CALM3	-1.40705	-0.0187686	0.512263	0.301861
ZNF687	1.74795	0.357909	0.511272	0.346228
ATG2B	-1.25483	-1.37129	0.509898	0.640086
MON2	-0.351629	-0.616975	0.509888	0.943077
RPS3	0.154705	0.296853	0.50979	0.664278
ATP13A1	-0.275242	0.362544	0.509772	0.383495
TFG	-0.48561	-0.285729	0.509688	0.508835
PTRH2	0.425952	-0.523547	0.509255	1.21423
RPL18A	-0.218263	-0.0886597	0.509208	0.388154
SUGP1	1.84839	2.33849	0.50918	0.608307
GBP1	0.328952	-4.46418	0.508835	0.994876
RBM17	-0.543583	-0.492571	0.507085	1.37682
RPS23	0.171213	0.010922	0.507032	0.311478
HK1	-0.69149	-1.07908	0.50617	1.03005
TRAP1	-0.347922	-0.497021	0.505234	1.74419
BUD13	-0.62001	-2.56304	0.505183	1.43804
MRPL23	0.109778	-1.44564	0.504789	0.734358
AUTS2	-0.340535	0.206622	0.504671	0.513513
EIF3C	-0.518642	-1.22223	0.504534	0.862945
CDK5	-0.426417	-1.34342	0.504401	1.04752
RPL36AL	1.4448	0.459535	0.503731	0.556417
PABPN1	-0.287814	-0.174221	0.50368	1.45357
ST13	-0.4155	-2.66981	0.503477	0.802891
PDCD6	-0.621396	-1.44146	0.503438	0.915093
ARHGDIA	-1.0076	-1.88535	0.503271	0.608309
PFKM	-0.257562	-0.723578	0.503093	1.01207
RPS28	-0.334024	0.321552	0.502416	0.480659
COG3	-0.557059	-1.14411	0.502006	1.01186
FKBP3	-0.091573	-0.613041	0.501815	0.65146
SLC1A5	-0.267489	-0.242175	0.501776	0.470309
DHX35	-2.93396	-1.14348	0.501333	0.899985
UBAP2	0.891719	-0.936253	0.501301	0.566093
SRP9	-0.237138	-0.58901	0.50104	1.37884
QSER1	0.228816	-0.957448	0.500643	0.634066
VWA8	-0.436217	-0.572117	0.500588	0.828093
RPS10	0.392141	0.409978	0.500056	0.471016
RPL6	0.138906	-0.0853833	0.49993	0.490755
GLYATL1	0.328834	-0.27042	0.499813	0.589808
FKBP5	-0.542764	-1.30024	0.499711	0.93463
SRP54	0.38277	-0.3762	0.499526	0.515685
ACOT7	-0.117997	0.856904	0.499496	0.357468
MRPL13	-0.751764	-0.868315	0.49923	0.751565
TAMM41	0.30996	2.10368	0.498358	0.528846
ZBTB20	0.647992	0.0405322	0.498358	1.03739
H3C15; H3C14; H3C13	-0.366697	-1.29332	0.498358	1.51301
HLA-B	2.10006	-20.4121	0.498358	1.01839
BOP1	0.269377	-0.67202	0.496417	0.61416
NOP58	-0.599127	-1.49684	0.496277	1.03186
GTF2A1	-0.597464	-0.568019	0.496227	1.22843
CAND1	-0.768705	-2.05027	0.496099	0.767644
NUP54	-0.550966	-1.09253	0.495791	0.823303
SPCS2	0.271829	0.0936557	0.495761	0.406756
TRIM23	-0.327745	-0.550692	0.495581	0.756825
HSPA6	-0.333037	-0.748469	0.49549	2.22332
RPP40	-0.336506	-0.0719088	0.494869	0.675049
SRSF2	0.0108194	-0.30561	0.494419	0.760039
MPDU1	-0.304319	-0.388928	0.494393	0.610827
SRP19	-0.255011	-1.47089	0.494277	1.66955
DEGS1	1.44304	1.31611	0.4941	0.438098
LAMTOR4	0.206494	-1.06305	0.49391	1.03739
TM7SF2	-0.275279	-0.168592	0.49338	0.445067
EXOSC3	0.641512	0.858538	0.493225	0.327544
POP4	-0.152022	-0.690715	0.493024	0.930371
PPL	0.363372	0.308154	0.492685	1.86046
EIF2S1	-0.471363	-1.06986	0.492637	0.917803
ABCD1	-0.286423	-0.863047	0.492029	0.720871
TCP1	-0.672192	0.332234	0.491902	0.49622
DNM2	-1.37363	-2.98688	0.491493	0.943149
LMAN2	0.841706	-0.239513	0.491044	0.346264
SYNGR2	-0.708668	-2.84131	0.49094	1.00215
PGAM5	0.409189	-0.147519	0.4909	0.505797
PPIB	-0.530891	-1.53244	0.490787	0.912247
EIF3E	-0.452788	-1.28453	0.490329	0.99416
RNPS1	-0.634811	-1.52426	0.489892	0.806607
MRPS33	-0.439687	0.399551	0.489584	0.473685
YLPM1	-0.573637	-1.72127	0.489534	1.11203
SMAP1	1.3128	0.641752	0.488835	0.321285
MAK16	-0.959875	-2.15207	0.48795	0.881557
PRKDC	-0.557759	-1.1632	0.487613	1.16726
GATA2	0.400303	-0.18497	0.487053	0.66071
ARPC3	0.291192	1.50281	0.48664	0.32304
[truncated: 837 more rows]

## Sheet: Fig5D
Sourced from Supp table 2 - Small Mol Inh BioiD pivot table
	AR-WT DMSO	AR-WT-1ae	AR-WT-EPI	Significance (P-value)
AR bait	2.33071e+10	2.32616e+10	1.6301e+10	n/a	n/a
Total Interactions + (BFDR 0.05)	6.5236e+10	4.73303e+10	5.79142e+10	0.1434	0.3221
AR known interactors BioGrid database + (BFDR 0.05)*	5.54824e+10	3.95684e+10	4.9702e+10	0.04684	0.6691
* AR Biogrid Interactors identified (BFDR 0.05)
ARID1A
SMARCC2
SMARCC1
SMARCA4
SMARCE1
ARID1B
TCF20
SMARCD2
KMT2D
DPF2
EP300
SMARCB1
CASZ1
JMJD1C
NFIB
CIC
NKX3-1
CREBBP
MAML1
FBRS
SMARCA2
ARID5B
ZMIZ2
FOXP1
SMARCD1
ZMIZ1
BCL7C
TRERF1
PAXIP1
RBBP5
LDB1
BCL7A
FOXP4
ZNF362
RAD54L2
RBPJ
TLE1
JUN
CHD3
BRD7
SMAD4
PCGF1
SAP130
ETV3
BCL9L
HDAC3
NCOA3
GPS2
KDM2B
NIPBL
NFIA
NCOR2
BCL9
ATXN1L
MED6
HIRA
FOXA1
TLE3
DNTTIP1
GSE1
FOSL2
ACTL6A
NCOA1
UBN2
RBM12
MLF2
RAI1
NCOR1
BCL6
AHDC1
POU2F1
TCF7L2
NCOA6
KDM1A
RBM14
EP400
NCOA2
ZNF318
ATN1
ASH2L
PSMB5
PYGO2
CTBP2

## Sheet: Fig 5E.EPI001 GO
	Homo sapiens (REF)
GO molecular function complete	raw P value	FDR
DNA binding	1.08E-07	5.36E-04
nucleic acid binding	3.61E-07	8.98E-04
transcription regulator activity	8.39E-07	1.39E-03
sequence-specific double-stranded DNA binding	1.27E-05	1.57E-02
sequence-specific DNA binding	2.13E-05	1.76E-02
double-stranded DNA binding	2.08E-05	2.07E-02
DNA-binding transcription factor activity, RNA polymerase II-specific	4.00E-05	2.84E-02
DNA-binding transcription regulator activity	5.20E-05	3.23E-02
organic cyclic compound binding	8.48E-05	3.52E-02
transcription regulatory region nucleic acid binding	8.26E-05	3.73E-02
heterocyclic compound binding	7.30E-05	4.03E-02
transcription cis-regulatory region binding	8.18E-05	4.07E-02
GO biological process complete	raw P value	FDR
regulation of biosynthetic process	2.31E-10	1.21E-06
regulation of macromolecule biosynthetic process	8.86E-11	1.39E-06
regulation of cellular biosynthetic process	1.79E-10	1.41E-06
regulation of transcription by RNA polymerase II	9.05E-10	2.84E-06
regulation of RNA metabolic process	7.82E-10	3.06E-06
regulation of RNA biosynthetic process	3.67E-09	6.39E-06
regulation of nucleic acid-templated transcription	3.53E-09	6.91E-06
regulation of nucleobase-containing compound metabolic process	2.86E-09	7.47E-06
regulation of DNA-templated transcription	3.50E-09	7.83E-06
regulation of cellular metabolic process	4.25E-08	6.66E-05
regulation of gene expression	4.81E-08	6.86E-05
negative regulation of macromolecule biosynthetic process	7.03E-08	9.19E-05
regulation of primary metabolic process	8.22E-08	9.91E-05
negative regulation of cellular biosynthetic process	1.05E-07	1.17E-04
negative regulation of biosynthetic process	1.27E-07	1.32E-04
regulation of macromolecule metabolic process	2.13E-07	2.09E-04
negative regulation of RNA metabolic process	4.80E-07	4.18E-04
positive regulation of RNA metabolic process	4.69E-07	4.33E-04
regulation of nitrogen compound metabolic process	6.13E-07	5.06E-04
regulation of metabolic process	8.56E-07	6.71E-04
negative regulation of nucleobase-containing compound metabolic process	1.05E-06	7.81E-04
positive regulation of nucleobase-containing compound metabolic process	1.38E-06	9.83E-04
positive regulation of RNA biosynthetic process	2.53E-06	1.59E-03
negative regulation of RNA biosynthetic process	2.84E-06	1.59E-03
positive regulation of DNA-templated transcription	2.45E-06	1.60E-03
negative regulation of nucleic acid-templated transcription	2.80E-06	1.63E-03
negative regulation of DNA-templated transcription	2.77E-06	1.67E-03
positive regulation of nucleic acid-templated transcription	2.45E-06	1.67E-03
negative regulation of cellular metabolic process	3.55E-06	1.92E-03
positive regulation of macromolecule biosynthetic process	7.55E-06	3.95E-03
positive regulation of cellular metabolic process	1.14E-05	5.78E-03
positive regulation of cellular biosynthetic process	1.21E-05	5.92E-03
positive regulation of biosynthetic process	1.43E-05	6.78E-03
negative regulation of macromolecule metabolic process	2.48E-05	1.14E-02
negative regulation of transcription by RNA polymerase II	3.50E-05	1.57E-02
negative regulation of nitrogen compound metabolic process	5.03E-05	2.19E-02
negative regulation of metabolic process	5.20E-05	2.20E-02
regulation of stem cell population maintenance	5.42E-05	2.23E-02
positive regulation of nitrogen compound metabolic process	9.18E-05	3.69E-02
positive regulation of metabolic process	1.02E-04	3.99E-02
negative regulation of cellular process	1.52E-04	5.82E-02
positive regulation of macromolecule metabolic process	2.53E-04	9.46E-02
regulation of cellular response to growth factor stimulus	2.70E-04	9.86E-02
endocrine system development	3.21E-04	1.14E-01
negative regulation of stem cell population maintenance	3.42E-04	1.19E-01
regulation of transforming growth factor beta receptor signaling pathway	3.89E-04	1.33E-01
regulation of cellular response to transforming growth factor beta stimulus	4.13E-04	1.38E-01
histone modification	4.75E-04	1.55E-01
negative regulation of biological process	5.25E-04	1.68E-01
regulation of cellular process	6.38E-04	2.00E-01
endocrine pancreas development	8.71E-04	2.68E-01
positive regulation of stem cell population maintenance	1.13E-03	3.41E-01
positive regulation of transcription by RNA polymerase II	1.29E-03	3.81E-01
regulation of biological process	1.52E-03	4.41E-01
negative regulation of developmental process	2.04E-03	4.99E-01
activation of innate immune response	2.10E-03	5.07E-01
negative regulation of mesonephros development	2.04E-03	5.07E-01
regulation of mesenchymal cell apoptotic process involved in mesonephric nephron morphogenesis	2.04E-03	5.15E-01
negative regulation of mesenchymal cell apoptotic process involved in mesonephric nephron morphogenesis	2.04E-03	5.24E-01
regulation of pronephros size	2.04E-03	5.32E-01
mesenchymal cell apoptotic process involved in metanephros development	2.04E-03	5.41E-01
regulation of deadenylation-dependent decapping of nuclear-transcribed mRNA	2.04E-03	5.51E-01
negative regulation of deadenylation-dependent decapping of nuclear-transcribed mRNA	2.04E-03	5.60E-01
regulation of androgen secretion	2.04E-03	5.70E-01
positive regulation of androgen secretion	2.04E-03	5.81E-01
regulation of transmembrane receptor protein serine/threonine kinase signaling pathway	2.70E-03	6.13E-01
pancreas development	2.69E-03	6.21E-01
rhythmic process	2.62E-03	6.21E-01
chromatin organization	2.68E-03	6.28E-01
hepatoblast differentiation	3.05E-03	6.38E-01
inactivation of X chromosome by genomic imprinting	3.05E-03	6.47E-01
sex differentiation	2.89E-03	6.48E-01
pronephros morphogenesis	3.05E-03	6.56E-01
mesonephric duct formation	3.05E-03	6.65E-01
pronephric nephron tubule development	3.05E-03	6.74E-01
metanephros development	3.51E-03	6.88E-01
reproductive system development	3.57E-03	6.91E-01
positive regulation of biological process	3.46E-03	6.95E-01
cell fate specification	3.51E-03	6.97E-01
reproductive structure development	3.44E-03	7.00E-01
kidney development	3.41E-03	7.03E-01
renal system development	3.70E-03	7.08E-01
regulation of mesenchymal cell apoptotic process involved in metanephros development	4.07E-03	7.34E-01
negative regulation of mesenchymal cell apoptotic process involved in metanephros development	4.07E-03	7.42E-01
vascular associated smooth muscle cell migration	4.07E-03	7.51E-01
chromatin remodeling	4.22E-03	7.52E-01
N-terminal peptidyl-lysine acetylation	4.07E-03	7.60E-01
pronephric nephron development	4.07E-03	7.69E-01
negative regulation of somatic stem cell population maintenance	5.08E-03	8.48E-01
histone glutamine methylation	5.08E-03	8.57E-01
urogenital system development	5.27E-03	8.61E-01
regulation of mesenchymal cell apoptotic process involved in nephron morphogenesis

## Sheet: Fig.5E.1ae GO
	Homo sapiens (REF)
GO molecular function complete	raw P value	FDR
transcription regulator activity	6.83E-18	3.40E-14
DNA binding	4.97E-13	1.24E-09
nucleic acid binding	9.96E-13	1.65E-09
RNA polymerase II-specific DNA-binding transcription factor binding	2.03E-11	2.52E-08
transcription factor binding	3.35E-10	3.33E-07
DNA-binding transcription factor binding	5.18E-10	4.30E-07
heterocyclic compound binding	2.13E-09	1.51E-06
organic cyclic compound binding	2.85E-09	1.77E-06
DNA-binding transcription factor activity, RNA polymerase II-specific	4.13E-09	2.28E-06
chromatin binding	4.70E-09	2.34E-06
DNA-binding transcription factor activity	6.78E-09	3.07E-06
transcription coregulator activity	1.58E-08	6.55E-06
sequence-specific double-stranded DNA binding	2.61E-08	1.00E-05
sequence-specific DNA binding	6.13E-08	2.03E-05
double-stranded DNA binding	5.90E-08	2.10E-05
transcription regulatory region nucleic acid binding	1.38E-07	4.03E-05
transcription cis-regulatory region binding	1.36E-07	4.22E-05
nuclear receptor binding	2.01E-07	5.56E-05
RNA polymerase II transcription regulatory region sequence-specific DNA binding	4.82E-07	1.26E-04
transcription coactivator activity	6.67E-07	1.66E-04
nuclear receptor coactivator activity	3.80E-06	9.00E-04
RNA polymerase II cis-regulatory region sequence-specific DNA binding	4.55E-06	1.03E-03
cis-regulatory region sequence-specific DNA binding	5.36E-06	1.16E-03
nuclear thyroid hormone receptor binding	2.57E-05	5.33E-03
transcription coregulator binding	5.21E-05	1.04E-02
MRF binding	6.19E-05	1.18E-02
transcription coactivator binding	7.04E-05	1.30E-02
DNA-binding transcription activator activity, RNA polymerase II-specific	1.60E-04	2.85E-02
DNA-binding transcription activator activity	1.68E-04	2.88E-02
p53 binding	2.79E-04	4.63E-02
GO biological process complete	raw P value	FDR
regulation of RNA biosynthetic process	4.50E-18	1.76E-14
regulation of nucleic acid-templated transcription	4.18E-18	2.18E-14
regulation of RNA metabolic process	1.90E-18	2.97E-14
regulation of DNA-templated transcription	4.11E-18	3.22E-14
regulation of nucleobase-containing compound metabolic process	2.09E-17	5.45E-14
regulation of transcription by RNA polymerase II	1.90E-17	5.95E-14
regulation of gene expression	1.88E-16	3.69E-13
regulation of macromolecule biosynthetic process	1.75E-16	3.92E-13
regulation of cellular biosynthetic process	5.60E-16	9.76E-13
regulation of biosynthetic process	8.52E-16	1.34E-12
regulation of cellular metabolic process	1.91E-14	2.50E-11
regulation of macromolecule metabolic process	1.81E-14	2.59E-11
regulation of nitrogen compound metabolic process	2.67E-14	3.22E-11
regulation of primary metabolic process	6.28E-14	7.04E-11
regulation of metabolic process	2.53E-13	2.64E-10
positive regulation of DNA-templated transcription	7.18E-12	6.62E-09
positive regulation of RNA biosynthetic process	7.63E-12	6.65E-09
positive regulation of nucleic acid-templated transcription	7.18E-12	7.04E-09
negative regulation of RNA biosynthetic process	1.64E-11	1.22E-08
negative regulation of nucleic acid-templated transcription	1.60E-11	1.25E-08
negative regulation of DNA-templated transcription	1.56E-11	1.29E-08
positive regulation of RNA metabolic process	2.63E-11	1.87E-08
negative regulation of RNA metabolic process	5.56E-11	3.79E-08
positive regulation of macromolecule biosynthetic process	6.25E-11	4.09E-08
negative regulation of macromolecule biosynthetic process	1.55E-10	9.34E-08
positive regulation of cellular biosynthetic process	1.55E-10	9.69E-08
positive regulation of nucleobase-containing compound metabolic process	1.68E-10	9.76E-08
positive regulation of biosynthetic process	2.13E-10	1.15E-07
negative regulation of nucleobase-containing compound metabolic process	2.07E-10	1.16E-07
negative regulation of cellular biosynthetic process	2.83E-10	1.48E-07
negative regulation of biosynthetic process	3.77E-10	1.91E-07
positive regulation of transcription by RNA polymerase II	1.09E-09	5.33E-07
negative regulation of transcription by RNA polymerase II	5.28E-09	2.51E-06
negative regulation of cellular metabolic process	5.67E-08	2.62E-05
nucleic acid-templated transcription	7.47E-08	3.25E-05
DNA-templated transcription	7.36E-08	3.30E-05
RNA biosynthetic process	8.67E-08	3.67E-05
negative regulation of nitrogen compound metabolic process	1.41E-07	5.82E-05
negative regulation of macromolecule metabolic process	1.65E-07	6.64E-05
positive regulation of cellular metabolic process	1.74E-07	6.84E-05
positive regulation of nitrogen compound metabolic process	2.28E-07	8.50E-05
positive regulation of macromolecule metabolic process	2.25E-07	8.62E-05
nucleic acid metabolic process	4.24E-07	1.55E-04
negative regulation of metabolic process	5.41E-07	1.93E-04
positive regulation of metabolic process	9.37E-07	3.26E-04
regulation of biological process	1.38E-06	4.69E-04
regulation of cellular process	1.93E-06	6.45E-04
histone modification	3.12E-06	1.02E-03
nucleobase-containing compound biosynthetic process	6.39E-06	2.05E-03
positive regulation of DNA-templated transcription initiation	6.60E-06	2.07E-03
biological regulation	7.61E-06	2.29E-03
nucleobase-containing compound metabolic process	7.58E-06	2.33E-03
positive regulation of transcription from RNA polymerase II promoter involved in cellular response to chemical stimulus	1.09E-05	3.24E-03
regulation of DNA-templated transcription initiation	1.18E-05	3.37E-03
heterocycle biosynthetic process	1.17E-05	3.39E-03
aromatic compound biosynthetic process	1.26E-05	3.54E-03
RNA metabolic process	1.32E-05	3.63E-03
heterocycle metabolic process	1.64E-05	4.44E-03
cellular aromatic compound metabolic process	2.04E-05	5.41E-03
organic cyclic compound biosynthetic process	3.25E-05	8.50E-03
transcription by RNA polymerase II	3.50E-05	9.00E-03
positive regulation of histone modification	4.10E-05	1.04E-02
club cell differentiation	4.42E-05	1.10E-02
positive regulation of histone acetylation	4.62E-05	1.13E-02
regulation of histone H3-K4 methylation	5.35E-05	1.27E-02
organic cyclic compound metabolic process	5.34E-05	1.29E-02
regulation of transcription from RNA polymerase II promoter in response to stress	6.16E-05	1.44E-02
positive regulation of peptidyl-lysine acetylation	7.04E-05	1.62E-02
regulation of DNA-templated transcription in response to stress	9.05E-05	2.06E-02
positive regulation of cell proliferation involved in heart morphogenesis	1.06E-04	2.37E-02
positive regulation of protein acetylation	1.27E-04	2.81E-02
negative regulation of DNA binding	1.34E-04	2.92E-02
cellular nitrogen compound metabolic process	1.46E-04	3.14E-02
somatic stem cell population maintenance	1.48E-04	3.15E-02
macromolecule biosynthetic process	1.74E-04	3.60E-02
positive regulation of transcription initiation by RNA polymerase II	1.72E-04	3.60E-02
localization	1.78E-04	3.63E-02
endothelial cell activation	1.93E-04	3.84E-02
sebaceous gland development	1.93E-04	3.89E-02
regulation of miRNA transcription	2.07E-04	4.06E-02
regulation of cellular response to growth factor stimulus	2.18E-04	4.22E-02
regulation of transcription initiation by RNA polymerase II	2.47E-04	4.72E-02
regulation of histone acetylation	2.57E-04	4.80E-02
endocardium development	2.66E-04	4.85E-02
neuron fate commitment	2.57E-04	4.86E-02
epithelial to mesenchymal transition involved in endocardial cushion formation	2.66E-04	4.91E-02
cellular nitrogen compound biosynthetic process	2.97E-04	5.29E-02
regulation of histone modification	2.95E-04	5.32E-02
atrioventricular canal development	3.07E-04	5.40E-02
DNA-templated transcription elongation	3.20E-04	5.57E-02
regulation of miRNA metabolic process	3.27E-04	5.63E-02
outflow tract morphogenesis	3.40E-04	5.79E-02
histone H3-K9 demethylation	3.50E-04	5.90E-02
regulation of peptidyl-lysine acetylation	3.66E-04	6.10E-02
gene expression	3.83E-04	6.32E-02
cardiac left ventricle morphogenesis	3.96E-04	6.47E-02
regulation of stem cell proliferation	4.37E-04	7.07E-02
negative regulation of cellular process	4.48E-04	7.18E-02
regulation of histone methylation	4.68E-04	7.41E-02
developmental process	5.09E-04	7.90E-02
positive regulation of cellular process	5.04E-04	7.91E-02
regulation of protein acetylation	5.51E-04	8.47E-02
regulation of cell proliferation involved in heart morphogenesis	6.09E-04	9.27E-02
animal organ development	7.23E-04	1.09E-01
regulation of developmental process	7.45E-04	1.11E-01
positive regulation of biological process	7.90E-04	1.16E-01
negative regulation of biological process	7.90E-04	1.17E-01
endocardial cushion formation	8.66E-04	1.25E-01
negative regulation of stem cell proliferation	8.66E-04	1.26E-01
transport	9.27E-04	1.32E-01
establishment of localization	9.54E-04	1.34E-01
histone methylation	9.52E-04	1.34E-01
positive regulation of multicellular organismal process	9.71E-04	1.35E-01
regulation of protein modification by small protein conjugation or removal	1.01E-03	1.36E-01
regulation of protein sumoylation	1.01E-03	1.37E-01
lung cell differentiation	1.01E-03	1.38E-01
lung epithelial cell differentiation	1.01E-03	1.39E-01
stem cell population maintenance	1.11E-03	1.46E-01
DNA-templated transcription initiation	1.11E-03	1.47E-01
positive regulation of histone H3-K4 methylation	1.17E-03	1.51E-01
myeloid cell differentiation	1.18E-03	1.52E-01
cardiac epithelial to mesenchymal transition	1.17E-03	1.53E-01
regulation of androgen receptor signaling pathway	1.25E-03	1.54E-01
maintenance of cell number	1.22E-03	1.54E-01
negative regulation of cardiac muscle hypertrophy	1.25E-03	1.56E-01
positive regulation of transmembrane receptor protein serine/threonine kinase signaling pathway	1.22E-03	1.56E-01
histone lysine demethylation	1.25E-03	1.57E-01
histone demethylation	1.33E-03	1.63E-01
regulation of cellular response to stress	1.36E-03	1.65E-01
regulation of transmembrane receptor protein serine/threonine kinase signaling pathway	1.37E-03	1.66E-01
response to hypoxia	1.41E-03	1.67E-01
negative regulation of muscle hypertrophy	1.42E-03	1.68E-01
regulation of DNA binding	1.40E-03	1.68E-01
anatomical structure development	1.48E-03	1.73E-01
positive regulation of cellular response to transforming growth factor beta stimulus	1.51E-03	1.74E-01
positive regulation of transforming growth factor beta receptor signaling pathway	1.51E-03	1.76E-01
protein dealkylation	1.60E-03	1.81E-01
protein demethylation	1.60E-03	1.82E-01
endocrine system development	1.60E-03	1.83E-01
response to decreased oxygen levels	1.66E-03	1.86E-01
regulation of DNA recombination	1.71E-03	1.90E-01
myeloid leukocyte differentiation	1.74E-03	1.93E-01
regulation of double-strand break repair	1.78E-03	1.95E-01
regulation of multicellular organismal process	1.80E-03	1.96E-01
negative regulation of striated muscle cell differentiation	1.90E-03	2.03E-01
positive regulation of developmental process	1.89E-03	2.03E-01
central nervous system development	1.89E-03	2.04E-01
regulation of transforming growth factor beta receptor signaling pathway	1.93E-03	2.05E-01
positive regulation of protein modification by small protein conjugation or removal	1.97E-03	2.07E-01
regulation of cellular response to transforming growth factor beta stimulus	2.05E-03	2.14E-01
endocardial cushion morphogenesis	2.11E-03	2.17E-01
peptidyl-lysine modification	2.14E-03	2.18E-01
brain development	2.13E-03	2.18E-01
lung epithelium development	2.11E-03	2.19E-01
regulation of response to DNA damage stimulus	2.21E-03	2.24E-01
regulation of cold-induced thermogenesis	2.26E-03	2.27E-01
protein alkylation	2.34E-03	2.28E-01
protein methylation	2.34E-03	2.30E-01
myeloid leukocyte activation	2.30E-03	2.30E-01
positive regulation of BMP signaling pathway	2.33E-03	2.31E-01
response to oxygen levels	2.34E-03	2.31E-01
mononuclear cell differentiation	2.53E-03	2.45E-01
ventricular septum morphogenesis	2.56E-03	2.46E-01
head development	2.87E-03	2.75E-01
response to abiotic stimulus	2.97E-03	2.82E-01
negative regulation of binding	3.01E-03	2.84E-01
ventricular cardiac muscle tissue morphogenesis	3.18E-03	2.97E-01
multicellular organism development	3.49E-03	2.98E-01
histone H3-K4 methylation	3.18E-03	2.98E-01
nervous system development	3.52E-03	2.98E-01
female gonad morphogenesis	3.49E-03	2.99E-01
positive regulation of cell proliferation involved in heart valve morphogenesis	3.49E-03	3.01E-01
positive regulation of miRNA transcription	3.31E-03	3.02E-01
lung ciliated cell differentiation	3.49E-03	3.02E-01
endocardial cushion development	3.31E-03	3.03E-01
positive regulation of response to DNA damage stimulus	3.27E-03	3.03E-01
positive regulation of canonical Wnt signaling pathway involved in heart development	3.49E-03	3.04E-01
negative regulation of cold-induced thermogenesis	3.31E-03	3.05E-01
regulation of cardiac myofibril assembly	3.49E-03	3.06E-01
negative regulation of cardiac myofibril assembly	3.49E-03	3.07E-01
positive regulation of ephrin receptor signaling pathway	3.49E-03	3.09E-01
chromatin organization	3.41E-03	3.09E-01
positive regulation of canonical Wnt signaling pathway involved in cardiac muscle cell fate commitment	3.49E-03	3.11E-01
positive regulation of histone ubiquitination	3.49E-03	3.13E-01
positive regulation of transcription elongation by RNA polymerase II	3.72E-03	3.13E-01
negative regulation of epithelial cell proliferation involved in lung morphogenesis	3.49E-03	3.14E-01
regulation of epithelial cell proliferation	3.93E-03	3.27E-01
positive regulation of response to stimulus	3.91E-03	3.28E-01
positive regulation of histone methylation	4.00E-03	3.32E-01
regulation of binding	4.12E-03	3.36E-01
lung development	4.08E-03	3.37E-01
tube development	4.10E-03	3.37E-01
positive regulation of miRNA metabolic process	4.15E-03	3.37E-01
regulation of cardiac muscle hypertrophy	4.30E-03	3.46E-01
respiratory tube development	4.33E-03	3.46E-01
mesenchyme morphogenesis	4.30E-03	3.48E-01
ventricular cardiac muscle tissue development	4.45E-03	3.52E-01
regulation of cardiac muscle tissue growth	4.45E-03	3.54E-01
regulation of cell differentiation	5.26E-03	3.66E-01
macrophage activation	5.24E-03	3.67E-01
positive regulation of DNA-templated transcription, elongation	5.24E-03	3.69E-01
forebrain development	4.68E-03	3.69E-01
blood vessel lumenization	5.23E-03	3.69E-01
cell differentiation involved in salivary gland development	5.23E-03	3.71E-01
regulation of muscle hypertrophy	4.76E-03	3.71E-01
arterial endothelial cell fate commitment	5.23E-03	3.73E-01
RNA polymerase II preinitiation complex assembly	4.76E-03	3.73E-01
leading edge cell differentiation	5.23E-03	3.74E-01
gonad morphogenesis	5.23E-03	3.76E-01
regulation of canonical Wnt signaling pathway involved in heart development	5.23E-03	3.78E-01
regulation of ephrin receptor signaling pathway	5.23E-03	3.80E-01
regulation of protein modification process	4.91E-03	3.81E-01
regulation of canonical Wnt signaling pathway involved in cardiac muscle cell fate commitment	5.23E-03	3.81E-01
regulation of interleukin-21 production	5.23E-03	3.83E-01
positive regulation of interleukin-21 production	5.23E-03	3.85E-01
nephrogenic mesenchyme morphogenesis	5.23E-03	3.87E-01
cardiac muscle tissue morphogenesis	5.08E-03	3.87E-01
regulation of heart growth	5.58E-03	3.87E-01
negative regulation of developmental process	5.03E-03	3.88E-01
regulation of mesenchymal cell proliferation involved in lung development	5.23E-03	3.88E-01
embryonic digit morphogenesis	5.08E-03	3.89E-01
negative regulation of mesenchymal cell proliferation involved in lung development	5.23E-03	3.90E-01
negative regulation of muscle cell differentiation	5.08E-03	3.91E-01
hemopoiesis	5.66E-03	3.91E-01
SMAD protein signal transduction	5.75E-03	3.92E-01
trigeminal sensory nucleus development	5.23E-03	3.92E-01
positive regulation of cell population proliferation	5.74E-03	3.93E-01
respiratory system development	5.73E-03	3.94E-01
principal sensory nucleus of trigeminal nerve development	5.23E-03	3.94E-01
leukocyte differentiation	5.21E-03	3.94E-01
demethylation	5.92E-03	4.00E-01
positive regulation of epithelial cell proliferation	5.96E-03	4.01E-01
somitogenesis	5.92E-03	4.02E-01
cell differentiation	6.06E-03	4.06E-01
heart valve development	6.10E-03	4.07E-01
tube morphogenesis	6.13E-03	4.07E-01
regulation of DNA repair	6.19E-03	4.10E-01
gland development	6.27E-03	4.13E-01
cellular developmental process	6.30E-03	4.13E-01
cardiac ventricle morphogenesis	7.01E-03	4.35E-01
cardiac septum morphogenesis	7.01E-03	4.36E-01
anterior/posterior pattern specification	6.68E-03	4.36E-01
left ventricular cardiac muscle tissue morphogenesis	6.96E-03	4.37E-01
muscle tissue morphogenesis	7.01E-03	4.38E-01
regulation of cell proliferation involved in heart valve morphogenesis	6.96E-03	4.39E-01
blood vessel endothelial cell fate specification	6.96E-03	4.40E-01
cellular response to anisomycin	6.96E-03	4.42E-01
cell activation	7.21E-03	4.43E-01
blood vessel endothelial cell fate commitment	6.96E-03	4.44E-01
transcription preinitiation complex assembly	7.20E-03	4.45E-01
N-terminal peptidyl-lysine acetylation	6.96E-03	4.46E-01
positive regulation of thyroid hormone mediated signaling pathway	6.96E-03	4.48E-01
positive regulation of DNA recombination	7.39E-03	4.49E-01
nephrogenic mesenchyme development	6.96E-03	4.49E-01
regulation of double-strand break repair via homologous recombination	7.39E-03	4.51E-01
kidney mesenchyme morphogenesis	6.96E-03	4.51E-01
regulation of cell population proliferation	7.38E-03	4.52E-01
animal organ morphogenesis	7.47E-03	4.52E-01
metanephric mesenchyme morphogenesis	6.96E-03	4.53E-01
ventricular septum development	7.59E-03	4.56E-01

## Sheet: Fig.5F
Sourced from Supp table 2 - Small Mol Inh BioiD pivot table
	AR-WT DMSO	AR-WT-1ae	AR-WT-EPI	FC1ae	FCEPI	LogFCEPI	LogFC1ae
MED1	6.93666e+07	2.27009e+07	3.9965e+07	3.05568	1.73568	-1.61149	-0.795505
MED10	6.88002e+06	1.00838e+06	1.04135e+07	6.82282	0.660685	-2.77037	0.597966
MED12	1.02143e+08	4.33217e+07	8.46799e+07	2.35778	1.20622	-1.23743	-0.270499
MED13	5.82475e+06		5.59607e+06		1.04086		-0.0577827
MED13L	2.24747e+06		6.67188e+06		0.336857		1.56979
MED14	2.84828e+07	4.33322e+06	3.98494e+07	6.57312	0.71476	-2.71658	0.48447
MED15	2.7152e+08	2.00529e+08	1.80615e+08	1.35402	1.50331	-0.437245	-0.588141
MED17	6.8415e+07	3.05132e+07	5.04292e+07	2.24215	1.35666	-1.16488	-0.440055
MED20	1.34331e+07	7.30398e+06	1.4418e+07	1.83915	0.93169	-0.879039	0.102077
MED22	1.52132e+07	8.06501e+06	7.64087e+06	1.88632	1.99102	-0.915573	-0.993511
MED23	9.17055e+08	7.35173e+08	1.16842e+09	1.2474	0.784868	-0.318925	0.349477
MED24	9.91223e+06	1.36409e+07	2.11923e+07	0.726656	0.467729	0.460656	1.09626
MED27	6.05153e+07	2.98358e+07	4.10203e+07	2.02828	1.47525	-1.02026	-0.560963
MED28	1.0282e+07	3.75656e+06	7.43702e+06	2.73707	1.38254	-1.45263	-0.467322
MED30	1.09047e+07	1.37935e+07	9.15745e+06	0.790573	1.1908	0.339029	-0.251937
MED31	1.85326e+06		3.78817e+06		0.489222		1.03144
MED4	4.60407e+07	5.0124e+07	5.879e+07	0.918534	0.783137	0.122595	0.352663
MED6	1.53521e+07	5.70866e+06	9.82108e+06	2.68927	1.56318	-1.42721	-0.644485
MED7	1.15419e+07		8.40414e+06		1.37336		-0.457715
MED8	5.32387e+07	2.01976e+07	2.34141e+07	2.63589	2.27379	-1.39829	-1.1851
MED9	1.26435e+07		1.07241e+07		1.17899		-0.237546

## Sheet: Fig.5G
Sourced from Supp table 2 - Small Mol Inh BioiD pivot table
	AR-WT DMSO	AR-WT-1ae	AR-WT-EPI	Significance (P-value) from original 3/4 independent expreiments
MED1	6.93666e+07	2.27009e+07	3.9965e+07	0.01384	0.06482

## Sheet: Fig.5I
PLA	MED1+AR
	4hrs										8hrs
	DMSO			EPI			1ae				DMSO			EPI			1ae
	Foci	Cells	Foci/Cell	Foci	Cells	Foci/Cell	Foci	Cells	Foci/Cell		Foci	Cells	Foci/Cell	Foci	Cells	Foci/Cell	Foci	Cells	Foci/Cell
	72	6	18	120	6	20	40	4	10		126	6	21	35	5	7	28	4	7
	224	8	28	176	8	22	12	3	4		91	7	13	88	8	11	40	5	8
	176	8	26	187	11	17	45	5	9		120	8	15	130	10	13	50	5	10
	182	7	16	70	5	14	36	4	9		225	9	25	110	11	10	28	4	7
	112	4	19	345	15	23	80	5	16		192	8	24	40	5	8	30	5	6
	77	7	18	80	5	16	90	6	15		170	10	17	70	7	10	42	6	7
	156	6	26	56	7	8	9	3	3		105	7	15	160	8	20	30	5	6
	90	6	15	80	5	16	28	4	7		70	5	14	98	7	14	72	6	12
	136	8	17	84	6	14	48	6	8		128	8	16	99	9	11	20	4	5
	84	6	9	15	3	5	55	5	11		40	4	10	63	7	9	100	10	10
	152	8	19	102	6	17	48	8	6		90	6	15	48	6	8	42	7	6
	126	6	26	51	3	17	56	4	14		270	10	27	84	6	14	36	6	6
	252	9	23	57	3	19	24	4	6		264	12	22	144	8	18	156	12	13
	80	5	12	68	4	17	78	6	13		168	8	21	60	5	12	143	13	11
	200	8	26	78	6	13	56	7	8		364	13	28	44	4	11	36	6	6
	88	4	24	68	4	17	56	4	14		84	6	14	49	7	7	35	5	7
	100	5	13	110	11	10	170	10	17		184	8	23	68	4	17	56	7	8
	57	3	19	230	10	23	55	11	5		260	10	26	114	6	19	25	5	5
	68	4	20	200	8	25	56	8	7		176	8	22	88	8	11	56	8	7
	75	5	15	36	6	6	56	7	8					63	7	9	36	6	6
	126	9	22	154	7	22											40	8	5
Total	2633	132	19.5714	2367	139	16.2381	1098	114	9.5	Total	3127	153	19.3684	1655	138	11.95	1101	137	7.52381
STDEV			5.25901			5.55792			4.11032				5.38734			3.94001			2.33707
Significance						0.0527565			4.14265e-08							2.58673e-05			4.91228e-09
PLA	ARID1+AR
	4hrs										8hrs
	DMSO			EPI			1ae				DMSO			EPI			1ae
	Foci	Cells	Foci/Cell	Foci	Cells	Foci/Cell	Foci	Cells	Foci/Cell		Foci	Cells	Foci/Cell	Foci	Cells	Foci/Cell	Foci	Cells	Foci/Cell
	84	7	12	90	5	18	110	10	11		176	8	22	35	5	7	135	9	15
	184	8	23	240	10	24	207	9	23		264	11	24	114	6	19	66	6	11
	216	9	24	165	11	15	175	7	25		136	8	17	104	8	13	65	5	13
	133	7	19	180	10	18	160	10	16		225	9	25	128	8	16	32	4	8
	90	6	15	63	3	21	105	7	15		144	8	18	45	5	9	12	4	3
	200	10	20	78	6	13	152	8	19		80	5	16	32	4	8	28	4	7
	189	9	21	140	7	20	112	7	16		140	7	20	50	5	10	55	5	11
	154	7	22	40	4	10	264	11	24		230	10	23	84	6	14	60	5	12
	225	9	25	66	6	11	252	12	21		200	8	25	75	5	15	126	9	14
	78	6	13	192	8	24	152	8	19		135	9	15	90	6	15	90	10	9
	153	9	17	105	7	15	120	8	15		85	5	17	119	7	17	50	5	10
	152	8	19	48	6	8	98	7	14		176	8	22	32	4	8	28	4	7
	154	7	22	64	4	16	108	6	18		225	9	25	36	4	9	18	3	6
	156	6	26	144	6	24	176	8	22		161	7	23	18	3	6	24	3	8
	140	10	14	102	6	17	85	5	17		156	6	26	171	9	19	66	6	11
	240	12	20	51	3	17	84	6	14		90	5	18	56	7	8	25	5	5
	176	8	22	45	5	9	52	4	13		147	7	21	72	6	12	16	4	4
	156	6	26	144	6	24	0				160	8	20	60	6	10	90	10	9
	189	9	21														0
Total	3069	153	20.0526	1957	113	16.8889	2412	133	17.7647	Total	2930	138	20.9444	1321	104	11.9444	986	101	9.05556
STDEV			4.22261			5.30137			4.10075				3.47211			4.17939			3.49053
Significance						0.0538039			0.108653							4.94484e-08			1.33961e-11
