# Supplementary material for: Rational optimization of a transcription factor activation domain inhibitor
Source: Nat Struct Mol Biol. 2023 Dec 4;30(12):1958–69. doi: 10.1038/s41594-023-01159-5 (PMC10716049; doi:10.1038/s41594-023-01159-5)
Supplement: Supplementary file 18 — Statistical source data. [file 41594_2023_1159_MOESM18_ESM.xlsx]

## Sheet: F6I-K
LNCaP95-D3 (P6) xenograft 2021-01-11
oral gavage. Single dose daily for 20 days
Dose: ENZA (10mg/kg), 1ae (30mg/kg)
	Vehicle(5%DMSO+1.5%Tween80+1%CMC control)						ENZA (10 mg/kg body weight)						Iae 30 mg/kg body weight
Days after 1st dose	mouse ID	Tumor size(mm3)	percent tumour volume	body weight (g)	body weight (%)		mouse ID	Tumor size(mm3)	percent tumour volume	body weight (g)	body weight (%)		mouse ID	Tumor size(mm3)	percent tumour volume	body weight (g)	body weight (%)
0	GD1-1-R	110.361	1.00001	30	1		GD2-3-L	77.7408	1.00001	29.3	1		GD7-4-R	82.0457	0.999948	26.4	1
0	GD2-1-L	94.1394	0.999994	26.1	1		GD2-3-R	47.2233	1.00007	29.3			GD9-3-L	88.6783	0.99998	26.8	1
0	GD2-1-R	73.5901	1	26.1			GD3-3-L	88.6245	1.00005	27.2	1		GD9-3-R	81.5885	0.999982	26.8
0	GD3-1-L	86.436	0.999953	27.4	1		GD3-3-R	53.375	1.00009	27.2			GD10-1-L	48.0455	0.999907	27.7	1
0	GD7-1-L	93.1637	1.00004	27.2	1		GD4-1-L	82.5669	0.999962	30.2	1		GD10-1-R	71.9904	1.00001	27.7
0	GD7-2-L	93.1881	0.99998	21.8	1		GD4-4-R	83.4893	0.999991	28.5	1		GD11-2-L	83.6811	1.00001	28	1
0	GD15-1-L	86.0145	1.00005	28.9	1		GD5-1-L	98.3855	0.999954	27.9	1		GD11-3-R	78.6624	1.00003	28
0	GD15-1-R	87.1794	0.999993	28.9			GD5-1-R	85.0255	0.999947	27.9			GD12-1-L	89.4767	0.999963	25.4	1
0	GD16-1-L	87.5878	0.999975	26.9	1		GD8-2-L	92.8159	0.999956	28.4	1		GD12-1-R	84.4179	0.999976	25.4
0	GD16-1-R	80.743	1.00004	26.9			GD8-3-R	93.3131	1.00003	28	1		GD13-1-L	77.4695	0.999994	25.7	1
													GD16-2-L	74.8839	1.00005	28.3	1
4	GD1-1-R	212.104	1.92193	28.9	0.963333		GD2-3-L	110.074	1.41592	28.1	0.959044		GD7-4-R	113.136	1.37887	26	0.984848
4	GD2-1-L	176.931	1.87945	25.5	0.977011		GD2-3-R	58.4777	1.23841	28.1			GD9-3-L	108.15	1.21955	25.2	0.940299
4	GD2-1-R	106.845	1.45189	25.5			GD3-3-L	168.435	1.90064	26	0.955882		GD9-3-R	118.377	1.45088	25.2
4	GD3-1-L	142.084	1.64373	27.2	0.992701		GD3-3-R	110.156	2.06401	26			GD10-1-L	59.5833	1.24003	26.3	0.949458
4	GD7-1-L	208.579	2.23894	27.1	0.996324		GD4-1-L	86.6612	1.04955	29.9	0.990066		GD10-1-R	93.9667	1.30527	26.3
4	GD7-2-L	176.592	1.89497	21	0.963303		GD4-4-R	117.254	1.40441	28.3	0.992982		GD11-2-L	116.399	1.391	27	0.964286
4	GD15-1-L	212.417	2.46968	27.9	0.965398		GD5-1-L	165.241	1.67945	27.5	0.985663		GD11-3-R	64.5159	0.820187	27
4	GD15-1-R	186.47	2.13891	27.9			GD5-1-R	133.845	1.57409	27.5			GD12-1-L	156.865	1.75307	23	0.905512
4	GD16-1-L	197.756	2.25775	25.8	0.959108		GD8-2-L	175.039	1.88579	28.1	0.989437		GD12-1-R	143.292	1.69737	23
4	GD16-1-R	172.433	2.13566	25.8			GD8-3-R	158.882	1.70273	26.3	0.939286		GD13-1-L	78.7901	1.01704	25.4	0.988327
													GD16-2-L	85.64	1.1437	27	0.954064
8	GD1-1-R	412.541	3.73814	28.3	0.943333		GD2-3-L	185.188	2.38214	26.8	0.914676		GD7-4-R	162.84	1.98464	24.5	0.92803
8	GD2-1-L	280.126	2.97563	24.3	0.931034		GD2-3-R	106.575	2.25699	26.8			GD9-3-L	176.6	1.99143	24.2	0.902985
8	GD2-1-R	181.214	2.46248	24.3			GD3-3-L	309.425	3.49159	25.6	0.941176		GD9-3-R	167.903	2.05789	24.2
8	GD3-1-L	236.029	2.73055	26.3	0.959854		GD3-3-R	151.396	2.83672	25.5			GD10-1-L	66.548	1.38497	26.1	0.942238
8	GD7-1-L	434.307	4.66194	26.7	0.981618		GD4-1-L	91.0162	1.10229	29.9	0.990066		GD10-1-R	147.447	2.04816	26.1
8	GD7-2-L	191.985	2.06014	20.6	0.944954		GD4-4-R	121.015	1.44945	26.8	0.940351		GD11-2-L	166.101	1.98496	25.8	0.921429
8	GD15-1-L	518.45	6.02779	28	0.968858		GD5-1-L	296.15	3.00996	26.9	0.964158		GD11-3-R	53.4823	0.679918	25.8
8	GD15-1-R	495.757	5.68659	28			GD5-1-R	242.128	2.84756	26.9			GD12-1-L	242.846	2.71397	22.9	0.901575
8	GD16-1-L	416.396	4.75392	23.7	0.881041		GD8-2-L	340.742	3.67099	27.3	0.961268		GD12-1-R	207.427	2.45708	22.9
8	GD16-1-R	301.63	3.73582	23.7			GD8-3-R	245.258	2.62842	26.1	0.932143		GD13-1-L	96.4033	1.24439	22	0.856031
													GD16-2-L	135.764	1.81309	26.3	0.929329
12	GD1-1-R	756.141	6.85159	27	0.9		GD2-3-L	229.836	2.95646	27.1	0.924915		GD7-4-R	280.278	3.41594	24	0.909091
12	GD2-1-L	375.615	3.98996	23.8	0.911877		GD2-3-R	125.101	2.64931	27.1			GD9-3-L	250.583	2.82569	24.4	0.910448
12	GD2-1-R	231.513	3.14599	23.8			GD3-3-L	430.601	4.85896	24.4	0.897059		GD9-3-R	223.814	2.74316	24.4
12	GD3-1-L	382.746	4.42788	26	0.948905		GD3-3-R	191.198	3.58249	24.4			GD10-1-L	129.417	2.69338	23.8	0.859206
12	GD7-1-L	631.085	6.77421	25.2	0.926471		GD4-1-L	80.4245	0.974015	29.7	0.983444		GD10-1-R	235.306	3.26859	23.8
12	GD7-2-L	247.269	2.65339	19.7	0.90367		GD4-4-R	191.374	2.29218	26.9	0.94386		GD11-2-L	197.656	2.36204	24.9	0.889286
12	GD15-1-L	706.283	8.21163	29.1	1.00692		GD5-1-L	359.224	3.65102	26	0.9319		GD11-3-R	39.27	0.499237	24.9
12	GD15-1-R	697.726	8.00328	29.1			GD5-1-R	363.325	4.2729	26			GD12-1-L	288.584	3.22513	21.8	0.858268
12	GD16-1-L	571.123	6.52041	23.8	0.884758		GD8-2-L	502.283	5.41136	27	0.950704		GD12-1-R	264.977	3.13879	21.8
12	GD16-1-R	398.489	4.93545	23.8			GD8-3-R	359.093	3.84839	26	0.928571		GD13-1-L	142.626	1.84105	20.4	0.793774
													GD16-2-L	161.906	2.16221	26.3	0.929329
16	GD1-1-R	1354.97	12.2777	27.9	0.93		GD2-3-L	345.455	4.44373	27.1	0.924915		GD7-4-R	401.871	4.89788	24	0.909091
16	GD2-1-L	605.422	6.43109	23.3	0.89272		GD2-3-R	234.962	4.97591	27.1			GD9-3-L	352.179	3.97135	23.9	0.891791
16	GD2-1-R	381.433	5.18321	23.3			GD3-3-L	648.609	7.319	24.4	0.897059		GD9-3-R	337.012	4.13056	23.9
16	GD3-1-L	704.466	8.14977	25.6	0.934307		GD3-3-R	302.317	5.66454	24.4			GD10-1-L	181.063	3.76823	24.1	0.870036
16	GD7-1-L	816.719	8.76684	26.1	0.959559		GD4-1-R	176.866	2.14202	28.9	0.956954		GD10-1-R	358.539	4.9804	24.1
16	GD7-2-L	306.262	3.28643	18.6	0.853211		GD4-4-R	257.344	3.08233	25.7	0.901754		GD11-2-L	318.387	3.80481	23.3	0.832143
16	GD15-1-L	1181.88	13.7411	28.7	0.99308		GD5-1-L	530.608	5.3929	26.6	0.953405		GD11-2-R	Tumor disappeared		23.3
16	GD15-1-R	908.763	10.424	28.7			GD5-1-R	614.092	7.22206	26.6			GD12-1-L	403.801	4.51275	22.4	0.88189
16	GD16-1-L	577.721	6.59574	25.7	0.95539		GD8-2-L	961.556	10.3594	26.2	0.922535		GD12-1-R	300.783	3.56294	22.4
16	GD16-1-R	723.985	8.96686	25.7			GD8-3-R	663.711	7.11297	25.3	0.903571		GD13-1-L	229.126	2.95761	21.8	0.848249
													GD16-2-L	249.163	3.32749	27.5	0.971731
20	GD2-1-L	779.376	8.27891	23.9	0.915709		GD2-3-L	432.623	5.565	26.4	0.901024		GD7-4-R	698.383	8.51168	24.1	0.912879
20	GD2-1-R	608.931	8.27464	23.9			GD2-3-R	228.767	4.84471	26.4			GD9-3-L	451.841	5.09519	24.6	0.91791
20	GD3-1-L	943.444	10.9144	25.4	0.927007		GD3-3-L	886.874	10.0076	25.9	0.952206		GD9-3-R	461.426	5.65542	24.6
20	GD7-1-L	1148.97	12.3333	26.8	0.985294		GD3-3-R	431.16	8.07869	25.9			GD10-1-L	242.048	5.03743	24.7	0.891697
20	GD7-2-L	363.858	3.90447	19.1	0.876147		GD4-1-R	316.515	3.83329	28.7	0.950331		GD10-1-R	402.995	5.59793	24.7
20	GD16-1-L	819.073	9.35121	25.2	0.936803		GD4-4-R	327.813	3.92637	24.8	0.870175		GD11-2-L	313.588	3.74746	24	0.857143
20	GD16-1-R	975.005	12.0759	25.2			GD5-1-L	631.255	6.41585	25.9	0.928315		GD11-2-R	No tumor		24
20	GD1-1-R	1531.86	13.8806	28.3	0.943333	IRB day 18	GD5-1-R	933.599	10.9796	25.9			GD12-1-L	515.032	5.75583	23.7	0.933071
20	GD15-1-L	1519.86	17.6707	28.2	0.975779	IRB day 18	GD8-2-L	1204.23	12.9738	26.9	0.947183		GD12-1-R	375.345	4.44616	23.7
20	GD15-1-R	1137.93	13.0527	28.2		IRB day 18	GD8-3-R	856.724	9.18148	24.3	0.867857		GD13-1-L	349.663	4.51353	22.9	0.891051
													GD16-2-L	361.354	4.82577	27.3	0.964664
LNCaP (P43) xenograft model 2020-08-16
Dose: ENZA (10mg/kg) , 1ae (30mg/kg
Routine: Oral Gavage, single dose for 28 days
	Vehicle(5%DMSO+1.5%Tween80+1%CMC control)						Enzalutamide(10mg/kg)						1ae (30mg/kg)
0	GB11-1-R	173.367	1	25.6	1		GB2-1-L	155.317	1	19.8	1		GB2-2-L	109.897	1	24.3	1
	GB11-2-L	116.337	1	25.3	1		GB2-1-R	97.5907	1	19.8			GB2-2-R	105.228	1	24.3	1
	GB11-2-R	155.486	1	25.3			GB5-1-L	135.391	1	24.5	1		GB6-1-L	122.014	1	25	1
	GB10-1-L	82.7834	1	20.2	1		GB5-2-R	143.696	1	23.6	1		GB6-1-R	70.3467	1	25	1
	GB10-1-R	108.413	1	20.2			GB2-4-L	99.2299	1	23	1		GB5-3-L	104.289	1	26.5	1
	GB7-2-L	110.398	1	25.2	1		GB2-4-R	90.9834	1	23			GB5-3-R	109.888	1	26.5	1
	GB7-2-R	113.192	1	24	1		GB7-3-L	124.293	1	25.3	1		GB5-4-L	103.486	1	24.4	1
	GB2-3-L	118.37	1	22.2	1		GB7-3-R	95.9691	1	25.3			GB5-4-R	110.264	1	24.4	1
	GB2-3-R	122.094	1	22.2
4	GB11-1-R	266.517	1.53727	25.2	0.984375		GB2-1-L	208.639	1.34328	21.8	1.10101		GB2-2-L	177.344	1.24234	24	1.04803
	GB11-2-L	144.644	1.24329	24.6	0.972332		GB2-1-R	143.928	1.47482	21.8			GB2-2-R	141.886	1.06738	24
	GB11-2-R	279.558	1.79792	24.6			GB5-1-L	151.574	1.11954	23.4	0.955102		GB6-1-L	139.219	1.14255	23.4	0.962963
	GB10-1-L	95.9641	1.15927	20	0.990099		GB5-2-R	132.872	0.924651	23.1	0.978814		GB6-1-R	115.129	1.30947	23.4
	GB10-1-R	127.734	1.17825	20			GB2-4-L	101.629	1.02418	24	1.04348		GB5-3-L	117.237	1.07439	23.6	0.967213
	GB7-2-L	119.221	1.0799	22.8	0.904762		GB2-4-R	90.659	0.996472	24			GB5-3-R	208.982	1.87126	23.6
	GB7-2-R	128.602	1.13616	22.8	0.95		GB7-3-L	148.968	1.19855	24	0.948617		GB5-4-L	136.876	1.19459	21	0.850202
	GB2-3-L	222.012	1.87558	23.8	1.07207		GB7-3-R	100.146	1.04351	24			GB5-4-R	160.708	1.16177	21
	GB2-3-R	179.467	1.46996	23.8
8	GB11-1-R	395.253	2.27983	26	1.01562		GB2-1-L	149.49	0.962464	23.2	1.17172		GB2-2-L	151.543	1.06159	22.8	0.995633
	GB11-2-L	139.779	1.20147	24.4	0.964427		GB2-1-R	103.565	1.06123	23.2			GB2-2-R	117.492	0.883865	22.8
	GB11-2-R	283.214	1.82143	24.4			GB5-1-L	185.96	1.37352	25.1	1.02449		GB6-1-L	141.542	1.16161	23.3	0.958848
	GB10-1-L	106.194	1.28285	19.2	0.950495		GB5-2-R	143.452	0.998274	24.4	1.0339		GB6-1-R	118.181	1.34419	23.3
	GB10-1-R	132.086	1.21839	19.2			GB2-4-L	143.498	1.44612	24.5	1.06522		GB5-3-L	130.89	1.1995	24.3	0.995902
	GB7-2-L	175.079	1.58586	24.2	0.960317		GB2-4-R	114.348	1.25685	24.5			GB5-3-R	248.814	2.22792	24.3
	GB7-2-R	169.072	1.4937	24.2	1.00833		GB7-3-L	175.532	1.41228	25.4	1.00395		GB5-4-L	180.95	1.57924	21.6	0.874494
	GB2-3-L	242.333	2.04725	22.6	1.01802		GB7-3-R	104.745	1.09143	25.4			GB5-4-R	169.964	1.22869	21.6
	GB2-3-R	254.62	2.08551	22.6
12	GB11-1-R	458.532	2.64481	26	1.01562		GB2-1-L	218.116	1.4043	22.7	1.14646		GB2-2-L	220.808	1.54681	22.9	1
	GB11-2-L	132.193	1.13626	23.2	0.916996		GB2-1-R	126.007	1.29118	22.7			GB2-2-R	148.828	1.1196	22.9
	GB11-2-R	241.652	1.55413	23.2			GB5-1-L	131.592	0.971945	24.6	1.00408		GB6-1-L	143.902	1.18097	23.9	0.983539
	GB10-1-L	133.519	1.61294	18.5	0.915842		GB5-2-R	144.979	1.0089	24.7	1.04661		GB6-1-R	133.329	1.51648	23.9
	GB10-1-R	168.934	1.55829	18.5			GB2-4-L	147.409	1.48553	25.1	1.0913		GB5-3-L	147.928	1.35564	24	0.983607
	GB7-2-L	258.571	2.34213	24.4	0.968254		GB2-4-R	103.531	1.13796	25.1			GB5-3-R	350.064	3.13452	24
	GB7-2-R	179.69	1.5875	24.4	1.01667		GB7-3-L	175.744	1.41398	25.2	0.996047		GB5-4-L	205.41	1.79272	20.6	0.834008
	GB2-3-L	294.269	2.48601	23.2	1.04505		GB7-3-R	111.869	1.16566	25.2			GB5-4-R	199.264	1.4405	20.6
	GB2-3-R	285.245	2.33635	23.2
16	GB11-1-R	451.537	2.60447	22.8	0.890625		GB2-1-L	223.057	1.43611	21.1	1.06566		GB2-2-L	214.383	1.50181	22	0.960699
	GB11-2-L	156.221	1.3428	22.4	0.885375		GB2-1-R	151.368	1.55106	21.1			GB2-2-R	167.909	1.26314	22
	GB11-2-R	285.41	1.83555	22.4			GB5-1-L	166.421	1.2292	23.7	0.967347		GB6-1-L	150.159	1.23233	22.5	0.925926
	GB10-1-L	148.357	1.79218	19.4	0.960396		GB5-2-R	154.64	1.07613	23.3	0.987288		GB6-1-R	131.512	1.49581	22.5
	GB10-1-R	257.901	2.37894	19.4			GB2-4-L	156.864	1.58081	24.6	1.06957		GB5-3-L	126.393	1.15829	24.6	1.0082
	GB7-2-L	263.556	2.38729	23.8	0.944444		GB2-4-R	140.194	1.54093	24.6			GB5-3-R	346.951	3.10665	24.6
	GB7-2-R	196.111	1.73258	23.8	0.991667		GB7-3-L	159.487	1.28318	26	1.02767		GB5-4-L	217.539	1.89858	21	0.850202
	GB2-3-L	321.45	2.71564	23.2	1.04505		GB7-3-R	115.793	1.20655	26			GB5-4-R	197.667	1.42895	21
	GB2-3-R	337.222	2.76208	23.2
20	GB11-1-R	547.921	3.16041	22.3	0.871094		GB2-1-L	219.894	1.41575	22.3	1.12626		GB2-2-L	199.878	1.4002	22	0.960699
	GB11-2-L	240.753	2.06939	22.9	0.905138		GB2-1-R	170.251	1.74456	22.3			GB2-2-R	170.646	1.28373	22
	GB11-2-R	474.279	3.05022	22.9			GB5-1-L	168.059	1.2413	24.9	1.01633		GB6-1-L	157.682	1.29407	23.5	0.967078
	GB10-1-L	188.039	2.27156	19.9	0.985149		GB5-2-R	141.856	0.987166	22.8	0.966102		GB6-1-R	122.661	1.39514	23.5
	GB10-1-R	270.052	2.49103	19.9			GB2-4-L	157.407	1.58628	25.3	1.1		GB5-3-L	141.433	1.29612	26.3	1.07787
	GB7-2-L	295.729	2.6787	23.9	0.948413		GB2-4-R	125.882	1.38362	25.3			GB5-3-R	427.556	3.8284	26.3
	GB7-2-R	200.918	1.77505	23.9	0.995833		GB7-3-L	187.182	1.50601	25.8	1.01976		GB5-4-L	217.203	1.89564	22.9	0.927126
	GB2-3-L	417.471	3.52683	24.6	1.10811		GB7-3-R	113.328	1.18087	25.8			GB5-4-R	184.536	1.33403	22.9
	GB2-3-R	364.8	2.98796	24.6
24	GB11-1-R	552.7	3.18798	21.8	0.851562		GB2-1-L	223.669	1.44005	23.5	1.18687		GB2-2-L	188.883	1.32317	22.2	0.969432
	GB11-2-L	241.955	2.07972	22.8	0.901186		GB2-1-R	204.218	2.09261	23.5			GB2-2-R	157.281	1.18319	22.2
	GB11-2-R	587.834	3.78053	22.8			GB5-1-L	176.721	1.30528	24.3	0.991837		GB6-1-L	156.227	1.28213	24.7	1.01646
	GB10-1-L	206.9	2.4994	20.3	1.00495		GB5-2-R	128.637	0.895179	23	0.974576		GB6-1-R	133.432	1.51765	24.7
	GB10-1-R	270.723	2.49722	20.3			GB2-4-L	153.668	1.5486	24.2	1.05217		GB5-3-L	130.2	1.19318	25.7	1.05328
	GB7-2-L	279.292	2.52982	24.3	0.964286		GB2-4-R	113.527	1.24783	24.2			GB5-3-R	472.392	4.22987	25.7
	GB7-2-R	231.201	2.04259	24.3	1.0125		GB7-3-L	213.146	1.71491	25.9	1.02372		GB5-4-L	329.995	2.88004	22.8	0.923077
	GB2-3-L	607.617	5.1332	24.3	1.09459		GB7-3-R	115.983	1.20853	25.9			GB5-4-R	298.666	2.15909	22.8
	GB2-3-R	462.147	3.7853	24.3
28	GB11-1-R	753.922	4.34863	21.4	0.835937		GB2-1-L	222.524	1.43268	24.6	1.24242		GB2-2-L	211.473	1.48142	21.8	0.951965
	GB11-2-L	291.148	2.50256	22.1	0.873518		GB2-1-R	177.573	1.81959	24.6			GB2-2-R	195.914	1.47382	21.8
	GB11-2-R	695.726	4.47441	22.1			GB5-1-L	173.302	1.28002	24.5	1		GB6-1-L	204.576	1.67892	24.7	1.01646
	GB10-1-L	222.096	2.68297	20.4	1.0099		GB5-2-R	159.015	1.10658	23.3	0.987288		GB6-1-R	163.198	1.85621	24.7
	GB10-1-R	319.243	2.94477	20.4			GB2-4-L	165.989	1.67277	24.2	1.05217		GB5-3-L	132.026	1.20991	25.7	1.05328
	GB7-2-L	308.787	2.79698	24.2	0.960317		GB2-4-R	111.458	1.22508	24.2			GB5-3-R	450.495	4.0338	25.7
	GB7-2-R	237.571	2.09887	24.2	1.00833		GB7-3-L	214.09	1.72251	26	1.02767		GB5-4-L	313.987	2.74033	21.7	0.878543
	GB2-3-L	614.555	5.19182	24.3	1.09459		GB7-3-R	113.808	1.18587	26			GB5-4-R	282.95	2.04547	21.7
	GB2-3-R	413.083	3.38343	24.3

## Sheet: F6C
Drug	Concentration	Nuclei Count
1ae	0.5	10551
1ae	0.5	10687
1ae	0.5	9804
1ae	0.5	10468
1ae	0.5	12975
1ae	0.5	10400
1ae	1	5819
1ae	1	5528
1ae	1	4289
1ae	1	9201
1ae	1	9594
1ae	1	8157
1ae	3	4597
1ae	3	4657
1ae	3	4417
1ae	3	5894
1ae	3	6535
1ae	3	5003
1ae	6	2042
1ae	6	2052
1ae	6	1203
1ae	6	2631
1ae	6	3131
1ae	6	2164
1ae	12	118
1ae	12	99
1ae	12	101
1ae	12	99
1ae	12	143
1ae	12	91
1ae	25	31
1ae	25	16
1ae	25	17
1ae	25	20
1ae	26	36
1ae	26	20
1ae	50	205
1ae	50	436
1ae	50	250
1ae	50	31
1ae	50	18
EPI-001	3	12664
EPI-001	3	16179
EPI-001	3	15818
EPI-001	3	13889
EPI-001	3	16794
EPI-001	3	14267
EPI-001	6	10740
EPI-001	6	14070
EPI-001	6	13623
EPI-001	6	14055
EPI-001	6	17235
EPI-001	6	15695
EPI-001	12	9491
EPI-001	12	10952
EPI-001	12	11408
EPI-001	12	11531
EPI-001	12	14391
EPI-001	12	13696
EPI-001	25	7072
EPI-001	25	6403
EPI-001	25	8755
EPI-001	25	4045
EPI-001	25	7685
EPI-001	25	6854
EPI-001	50	1547
EPI-001	50	1987
EPI-001	50	1795
EPI-001	50	1672
EPI-001	50	807
EPI-001	50	1257
EPI-001	100	54
EPI-001	100	61
EPI-001	100	64
EPI-001	100	33
EPI-001	100	40
EPI-001	100	29
EPI-001	200	14
EPI-001	200	10
EPI-001	200	13
EPI-001	200	13
EPI-001	200	5
EPI-001	200	12

## Sheet: F6D
				25uM EPI-001 vs DMSO, 24 hours
Gene	log2FoldChange	padj		Gene	log2FoldChange	padj
KLK3	-2.28316	0		DDIT4	1.51218	5.76458e-124
NKX3-1	-1.83999	0		SLC7A5	1.303	2.80661e-96
KLK2	-2.86994	0		FAM110B	-0.950219	3.49466e-96
FAM110B	-1.4366	1.35163e-212		TTN	-3.35841	1.1658e-95
STK39	-1.1989	3.20784e-210		ST3GAL1	0.682129	9.24223e-91
SLC45A3	-1.49837	9.30175e-209		PCK2	1.28485	3.26894e-82
DDIT4	1.91065	1.02103e-201		CCDC141	-3.21418	3.26894e-82
C1orf116	-1.12409	2.06055e-197		FAM102A	1.23262	3.20671e-81
PMEPA1	-1.63821	1.6987e-193		ASNS	1.14857	7.98157e-81
TTN	-5.3917	1.998e-188		FKBP5	-1.28607	1.54076e-77
SLC7A5	1.76468	5.57297e-183		GDF15	1.66115	1.358e-75
GPR158	-1.34775	9.60611e-183		FAM129A	1.5094	2.93958e-69
MCM4	-0.946832	1.01377e-179		SEL1L3	0.661731	7.92144e-68
TMPRSS2	-1.44065	6.24934e-177		GARS	0.662509	5.77768e-67
ASNS	1.67127	2.30531e-174		RHOU	-0.938124	7.11945e-65
CHRNA2	-2.81281	3.59373e-171		ATXN1	1.09276	5.89567e-63
ATXN1	1.71277	4.60333e-168		C1orf116	-0.627609	8.86107e-62
THBS1	-1.83323	3.01592e-155		NKX3-1	-0.796492	9.75363e-62
FKBP5	-1.81909	8.80629e-155		STK39	-0.634664	3.31415e-60
HOMER2	-0.827817	1.0283e-145		ACSL3	-0.898326	1.42345e-59
GARS	0.945227	2.24206e-139		ELL2	-1.0199	3.95104e-59
TRPM8	-1.89049	2.78329e-139		NCAPD3	-0.624805	5.53425e-59
ST6GALNAC1	-2.03664	1.3732e-138		MCM4	-0.53858	4.21961e-58
RHOU	-1.35016	2.90227e-133		PMEPA1	-0.864916	5.71011e-55
FAM129A	2.03601	1.67695e-132		ACKR3	0.928548	8.18418e-50
ZNF385B	-1.23057	1.40868e-129		SLC6A9	1.19703	9.41495e-50
PCK2	1.55659	8.49994e-123		KLK2	-0.985276	1.5414e-49
NCAPD3	-0.890843	5.49436e-121		TMCO3	0.650316	2.44911e-49
IGF1R	-1.43626	2.08196e-119		MAF	-1.91406	5.9997e-49
ELL2	-1.44254	1.68976e-118		CENPN	-0.821905	7.09798e-49
CDC25A	-1.06742	3.24099e-116		SLC7A11	1.39012	4.47247e-47
CCDC141	-5.3898	4.24948e-116		EFNB2	-0.943217	9.21852e-47
LAMC1	-0.786525	2.06735e-113		CHAC1	1.7906	1.8793e-46
TMEFF2	-1.27027	9.2511e-113		THBS1	-0.962634	2.53197e-46
CENPN	-1.22537	1.33164e-108		CHRNA2	-1.34514	2.93523e-46
SLC7A11	2.07009	5.12107e-106		IGF1R	-0.891521	6.48084e-46
GRB10	0.891	3.06221e-105		LASP1	0.748103	1.52379e-45
AFF3	-1.43791	3.21698e-103		PSAT1	0.823584	1.88531e-45
CAMK2N1	1.64776	5.05636e-103		TSC22D3	1.20869	1.13589e-44
PDLIM5	-0.749081	4.12471e-102		GRB10	0.582398	2.78425e-44
ACSL1	0.887427	8.66141e-100		ADAM7	-1.48253	2.97239e-44
ADAM7	-2.31073	1.24081e-97		SESN2	1.06095	2.42715e-42
NA	-2.2015	4.55987e-97		KLK3	-0.805024	9.7655e-41
TMCO3	0.882461	1.27993e-95		PDLIM5	-0.474848	1.23366e-40
RASSF3	-1.03084	1.91084e-95		RCN1	0.515856	1.52386e-40
PSAT1	1.18114	6.21902e-95		NBPF1	0.722153	1.19257e-39
MCM10	-0.983338	7.90246e-93		F5	-1.71997	3.69725e-38
MSH6	-0.81296	8.09568e-93		DDIT3	1.26284	1.33098e-37
PHLDA1	-1.29938	1.6514e-89		TRPM8	-0.93337	4.84678e-37
SEL1L3	0.749426	2.03995e-89		ADM2	1.13155	5.27134e-37
SLC6A9	1.53812	2.35778e-86		LAMA1	-1.78848	7.42516e-37
CHAC1	2.39641	5.76713e-86		NA	-1.29189	1.36368e-36
AP003057.1	-1.68302	1.22529e-85		LINC01133	1.99831	2.23269e-36
F5	-2.73255	2.63086e-83		IRF6	0.673233	3.6105e-36
ABCC4	-1.29775	1.11409e-82		MSH6	-0.502426	3.12332e-35
TMEM164	-0.938449	1.13112e-82		LMNB1	-0.447867	5.89258e-34
TULP4	0.925505	2.16694e-82		TRIB3	0.983386	8.46089e-33
LAMA1	-3.15305	7.99808e-82		TMEM164	-0.587131	3.69853e-32
KCNN2	-0.914553	2.32809e-81		MT1F	2.06647	5.04017e-32
TSC22D3	1.60373	2.64571e-81		ZWINT	-0.563143	6.97692e-32
HERC3	-1.04489	5.30656e-81		ZNF385B	-0.591318	2.9311e-31
ACSL3	-1.03744	1.57208e-80		FZD5	-0.699996	8.75275e-31
CSMD1	1.0838	1.4292e-79		OTULINL	-0.974322	1.00826e-30
TAOK3	-0.871659	3.49513e-79		ATF3	0.952412	1.00826e-30
DDIT3	1.76323	1.54356e-76		LAMC1	-0.408192	2.45186e-30
SLFN5	1.20474	4.46944e-73		USP54	0.43721	2.53665e-30
PIK3R3	0.665068	2.76471e-72		POP1	-0.60503	3.04472e-30
LRRN1	1.1475	2.90009e-72		SLC3A2	0.742052	4.3159e-30
LMNB1	-0.64399	2.74487e-71		SLC1A4	0.828794	5.86946e-30
MAF	-2.34026	4.57494e-71		MCM10	-0.557253	6.12041e-30
GDF15	1.6004	6.14363e-71		SDC4	0.752229	9.57306e-30
LASP1	0.919265	9.18535e-71		KPNA2	-0.509616	2.42578e-29
IRF6	0.919444	1.6054e-70		ARHGEF2	0.875127	7.64066e-29
POP1	-0.915715	1.03221e-69		TPX2	-0.42136	1.13907e-28
MTHFD2	0.766741	3.88622e-69		ATF4	0.894413	7.0173e-28
GREB1	-1.61009	8.48488e-69		SYTL2	0.978823	2.57673e-27
OTULINL	-1.46685	1.04271e-68		CDC25A	-0.510042	3.63457e-27
USP54	0.65007	1.25823e-68		MTHFD2	0.487689	3.68024e-27
SGPL1	0.614152	1.28478e-68		ST6GALNAC1	-0.873806	3.88917e-27
ACKR3	1.07125	3.50519e-68		SLC15A2	-1.61619	4.23145e-27
BMF	1.04007	3.94296e-68		RNF187	0.783902	1.90148e-26
TMTC2	-1.00881	4.68593e-66		SARS	0.718269	2.59309e-26
NIPSNAP3A	1.34867	7.92073e-66		HERPUD1	0.557633	2.09963e-25
EFNB2	-1.09443	1.38795e-64		SLC1A5	0.746116	2.60024e-25
ABHD2	-0.810582	6.82376e-64		TAOK3	-0.490787	5.54925e-25
LINC01133	2.58798	8.31435e-64		ACPP	0.806224	5.88131e-25
RFWD3	-0.693827	1.329e-63		WARS	0.428057	1.02521e-24
PPARGC1B	-1.10652	8.86061e-63		ATAD2	-0.70573	1.33573e-24
SLC1A4	1.15142	4.22161e-61		ABCC4	-0.70445	2.94388e-24
MT1F	2.75481	2.88393e-60		MYO1B	-0.633356	3.3887e-24
NUCB2	1.30507	4.80191e-60		NCAPD2	-0.430557	6.17023e-24
ZWINT	-0.765249	6.03574e-60		TULP4	0.510681	1.07661e-23
SESN2	1.24712	6.60821e-60		RFWD3	-0.425168	1.46331e-23
TRIB3	1.30602	4.72741e-59		RASSF3	-0.51401	1.64939e-23
TYMS	-0.753835	7.56348e-59		SMIM14	0.726975	1.84993e-23
TNFAIP8	-1.41494	6.59523e-58		LRP10	0.665002	1.96788e-23
ENDOD1	-0.711694	4.15055e-57		GPNMB	1.57072	2.62077e-23
SMIM14	1.10382	1.01144e-56		DNASE2	0.829511	3.21728e-23
IQGAP2	-1.20683	1.35002e-56		CCNB1	-0.572915	3.25093e-23
FZD5	-0.93556	7.03338e-56		AP003057.1	-0.839066	3.50525e-23
KLK4	-1.24732	5.86634e-55		TRIP13	-0.441843	5.76208e-23
DUSP4	-1.25023	1.90091e-54		BMF	0.618598	3.828e-22
MYO1B	-0.944211	2.38799e-54		ASRGL1	-0.761473	4.24605e-22
ARHGEF2	1.1653	5.54358e-53		LDHA	-0.4541	4.515e-22
DDC	0.848872	7.5645e-53		TNFAIP8	-0.856991	6.67495e-22
FEN1	-0.895135	1.72539e-52		PAK1IP1	-0.70497	6.92428e-22
PPIF	-0.760493	1.88796e-52		HOMER2	-0.318382	8.36177e-22
C5orf66	1.4027	1.91706e-52		BMPR1B	-1.01626	8.70829e-22
TRIP13	-0.658105	5.36166e-52		AJUBA	0.793052	1.78603e-21
ATAD2	-1.01659	1.16187e-51		NA	-0.721742	1.84783e-21
SDC4	0.973993	1.78317e-51		AFF3	-0.640297	2.11189e-21
KDM5B	0.597701	2.42801e-51		SLC38A4	-2.99987	2.14841e-21
CDC6	-0.686954	4.19177e-51		CARS	0.66303	2.36986e-21
RCN1	0.56911	4.79607e-51		KIF20A	-0.604413	3.24197e-21
CDC45	-0.81083	5.27105e-51		PRC1	-0.408045	4.56398e-21
ABCC1	-0.758099	5.49414e-51		SPAG5	-0.494855	5.40478e-21
RAD54L	-0.938412	5.88957e-51		SHMT2	0.580931	5.40478e-21
RRM2	-0.811481	1.6333e-50		CSMD1	0.570006	5.40478e-21
MCM5	-0.838457	2.36076e-50		SFPQ	-0.352102	7.38253e-21
KIF18B	-0.935205	3.60547e-50		XBP1	0.625808	8.66095e-21
SIPA1L2	-0.690135	7.90884e-50		SGPL1	0.344859	1.91514e-20
LYAR	-0.956571	2.26589e-49		GUSBP1	0.507169	2.00902e-20
UNG	-0.727028	5.56683e-49		DIAPH1	-0.391097	2.76314e-20
C19orf48	-1.0496	5.90026e-49		NUCB2	0.768584	3.79972e-20
MFSD6	0.840109	7.88423e-49		FANCI	-0.468448	6.29206e-20
NCOA7	1.05653	1.49657e-48		MAP2	-0.651601	7.1223e-20
NT5DC3	-0.997017	1.58558e-47		GTPBP2	0.886897	7.25708e-20
CEBPG	0.832431	2.18793e-47		GABARAPL1	0.659496	8.05539e-20
PPFIBP2	-0.803705	3.99295e-47		CEBPG	0.54831	8.05539e-20
CDK2	-0.695911	5.46503e-47		GNB4	-0.886376	1.26889e-19
MCCC2	-0.608815	1.14271e-46		JAG1	-0.445845	2.31594e-19
MAOA	-0.607128	1.20342e-46		STC2	0.750151	2.61314e-19
ASRGL1	-1.09959	1.95301e-46		PPARGC1B	-0.609951	2.6416e-19
DTL	-0.920621	2.41412e-46		RELN	1.08809	2.73934e-19
ADM2	1.24743	5.37423e-46		TMEM140	1.20418	3.11477e-19
NEDD4L	-0.519154	2.94396e-45		LYAR	-0.596227	3.41303e-19
WARS	0.569439	2.98959e-45		CDC42EP3	-0.573887	3.72959e-19
ORC1	-0.867424	3.50384e-45		SLFN5	0.633574	3.72959e-19
SLC15A2	-2.15566	4.86398e-45		UTP20	-0.493419	4.02472e-19
SYTL2	1.22607	9.00891e-45		DTL	-0.592834	4.37056e-19
TENM1	-1.9009	2.2047e-44		PHGDH	0.702907	5.92401e-19
MBOAT2	-1.18337	2.67708e-44		LRRN1	0.603229	5.92401e-19
MCM6	-0.725238	3.43354e-44		GPR158	-0.424722	7.27603e-19
CDCA7	-0.949398	3.9476e-44		OCLN	0.592155	7.6339e-19
FOLH1	0.622177	5.05371e-44		DHRS3	1.28651	9.42995e-19
CTPS1	-0.565647	5.92562e-44		AURKA	-0.435894	1.10424e-18
ACPP	1.03173	1.30129e-43		UAP1	-0.558879	1.35357e-18
LDHA	-0.633418	1.38766e-43		GTSE1	-0.452008	1.37747e-18
RAB3B	-0.689002	1.98876e-43		C5orf66	0.866123	1.4608e-18
HPGD	-2.67587	2.36412e-43		NAV3	-0.664923	1.58312e-18
TMEM140	1.7345	2.85292e-43		HPGD	-1.5459	2.29578e-18
NUP188	-0.548796	4.45104e-43		LARP6	0.869855	2.4808e-18
CENPO	-0.706283	6.03448e-43		ABAT	0.434632	3.00606e-18
DHCR24	-0.684609	1.55441e-42		CAPN5	1.06353	3.10862e-18
DCLRE1B	-0.810104	2.24781e-42		RACGAP1	-0.39078	4.38376e-18
TSR1	-0.679078	2.96053e-42		QSOX1	0.574642	4.9883e-18
MPC2	-0.862402	4.60617e-42		KIF4A	-0.442399	6.49064e-18
TMEM201	-0.834385	5.73448e-42		TACC1	-0.400912	7.53358e-18
ZBTB16	-1.53244	5.9175e-42		TYMS	-0.416123	7.78038e-18
RRP1B	-0.584809	6.56026e-42		UGT2B17	0.765962	8.19892e-18
OCLN	0.851526	9.23511e-42		INPP4B	-0.801427	1.34331e-17
ST3GAL1	0.459327	1.13272e-41		TBX15	-2.00601	1.39468e-17
BMPR1B	-1.41209	1.41932e-41		PSPH	0.605715	1.65323e-17
PBX1	1.20949	1.58451e-41		SLC39A10	-0.923921	1.82254e-17
NCAPD2	-0.560045	2.8457e-41		NUP188	-0.350453	2.52533e-17
SLC31A1	0.616352	4.66414e-41		PGPEP1	0.695755	3.6526e-17
SCD	0.661557	4.96128e-41		VLDLR-AS1	1.74962	4.32108e-17
INPP4B	-1.23014	6.00683e-41		DEPDC1B	-0.549024	5.51535e-17
UGT2B17	1.14623	7.9065e-41		NIPSNAP3A	0.695972	7.77963e-17
E2F8	-0.974068	1.48424e-40		SMS	-0.384326	8.83016e-17
NA	1.83966	3.55695e-40		MT1G	1.75033	9.58258e-17
DSC1	-2.64527	4.86723e-40		SHCBP1	-0.481928	9.58258e-17
UAP1	-0.814774	5.30626e-40		PRR11	-0.479167	1.0662e-16
TRPS1	0.747601	5.418e-40		RRM1	-0.438427	1.19596e-16
PPRC1	-0.752003	6.97196e-40		TM7SF2	0.699251	1.29663e-16
TPX2	-0.490666	7.32393e-40		KPNB1	-0.312337	1.31291e-16
TBC1D30	-0.645893	7.32393e-40		DUSP4	-0.674891	1.46862e-16
UGT2B15	1.27102	1.14472e-39		MBOAT2	-0.72519	1.56443e-16
RNF187	0.95159	1.18187e-39		NQO1	0.820556	1.63913e-16
PAK1IP1	-0.939962	1.25005e-39		CDCA2	-0.445441	1.64444e-16
AJUBA	1.0569	1.35676e-39		MOCOS	0.419036	2.86523e-16
TIMP2	0.942808	1.72037e-39		MT2A	1.07591	2.92966e-16
ANKH	-0.55718	1.85918e-39		ANLN	-0.504689	3.7981e-16
NEBL	1.52147	2.38737e-39		DSC1	-1.4644	3.90154e-16
KLHL24	1.15569	2.41227e-39		SALL2	0.591542	7.74778e-16
TP53INP1	1.23854	2.56829e-39		ABCC1	-0.423612	8.03091e-16
TEX2	-0.561225	3.10667e-39		PLPP2	0.934813	8.70692e-16
SLC25A37	-0.56015	3.40433e-39		TBRG1	-0.362164	1.03138e-15
GNB4	-1.24802	4.15092e-39		NSUN2	-0.329951	1.06796e-15
TICRR	-0.909314	4.84595e-39		DCAF6	-0.37908	1.1135e-15
SMPD4	-0.638734	5.09355e-39		HERC3	-0.459292	1.12289e-15
MCM7	-0.786012	7.55086e-39		ASS1	0.59959	1.20147e-15
FAM198B	1.05192	9.14916e-39		RPS6KA2	0.494368	1.3497e-15
POLA2	-0.705702	1.26559e-38		SLC31A1	0.384561	1.53288e-15
ORC6	-0.854202	1.89386e-38		CDC6	-0.378909	1.7746e-15
PER1	-1.06617	2.49925e-38		PBX1	0.762027	1.81781e-15
APLN	-1.15657	2.89091e-38		CBFA2T2	0.430727	2.01498e-15
MCM3	-0.676289	3.04288e-38		NCKAP5L	0.810992	2.21369e-15
LINC01297	-1.80629	4.10492e-38		MARS	0.465434	2.50723e-15
MTHFD1	-0.499795	6.39935e-38		SVIL	0.827644	2.64092e-15
MT2A	1.62892	7.04775e-38		SKP2	-0.649542	2.65148e-15
MAP2	-0.891333	7.11116e-38		GREB1	-0.742359	3.11156e-15
NSUN2	-0.507191	8.71087e-38		ALDH2	0.761267	3.29813e-15
TNPO2	-0.598908	8.72006e-38		PPP2R5B	0.780728	3.32331e-15
ESRP1	0.805572	1.70751e-37		TNFSF15	0.816828	3.35843e-15
TOP3A	-0.54529	2.25173e-37		DIO3	3.17875	3.65716e-15
AURKB	-0.762452	2.5327e-37		SQSTM1	0.58311	3.71198e-15
AADAT	-0.811994	6.98643e-37		URB1	-0.376727	3.99082e-15
RFC5	-0.733441	7.80051e-37		FAM198B	0.663356	3.99359e-15
PRKD1	0.57029	1.32096e-36		MCCC2	-0.347583	4.20378e-15
C1orf21	-0.543946	1.96994e-36		RRP1B	-0.35266	4.58569e-15
SELENBP1	0.890066	2.0951e-36		RRM2	-0.443932	4.58569e-15
CAPN5	1.45018	2.71479e-36		BUB1B	-0.475709	4.73706e-15
MCM8	-0.757404	3.90868e-36		FOLH1	0.36517	5.23677e-15
GUSBP1	0.657833	6.72097e-36		IQGAP2	-0.615383	5.52639e-15
TRGC1	-2.65229	8.77626e-36		TMPO	-0.427665	6.27415e-15
SLBP	-0.702705	8.80672e-36		MTHFR	0.428842	6.27415e-15
XPO6	-0.421708	1.20869e-35		GEMIN5	-0.395273	6.54827e-15
ASF1B	-0.842495	1.62854e-35		VIM	0.805922	6.65966e-15
ATF4	0.998174	2.53679e-35		ALDH3A2	0.45406	6.94144e-15
SMS	-0.551867	2.97353e-35		TSPAN31	0.671589	7.1686e-15
SNHG17	-0.653505	5.145e-35		MTOR	-0.391943	7.3118e-15
GTPBP2	1.15438	5.15016e-35		NDRG1	-0.464517	7.31832e-15
TES	0.653807	5.54044e-35		TMTC2	-0.471454	7.91863e-15
SSBP2	1.04149	6.74859e-35		IL1RN	1.1956	9.32246e-15
SORD	-0.584458	8.0496e-35		BIRC5	-0.434175	9.44926e-15
XBP1	0.800644	9.59464e-35		HMGCR	-0.484443	9.46441e-15
CDT1	-0.777383	1.96374e-34		HMOX1	1.1344	9.69524e-15
LRP10	0.79387	2.44381e-34		CMC2	-0.563655	1.14493e-14
PDIA5	-0.684554	2.78614e-34		FAM83D	-0.476299	1.14687e-14
GINS3	-0.89793	2.79998e-34		MELK	-0.420948	1.15292e-14
PRKAR2A	-0.403489	2.80019e-34		BCCIP	-0.485812	1.39548e-14
GSR	-0.471619	4.79411e-34		MCM6	-0.416517	1.55982e-14
KCNMA1	-0.595637	5.24579e-34		TIMP2	0.588749	1.58025e-14
PNP	-0.764339	6.53685e-34		PLK1	-0.46802	1.67477e-14
ALDH3A2	0.672931	1.74124e-33		TMEM100	-2.87912	1.97844e-14
CLN6	-0.607022	2.02664e-33		DDC	0.448545	2.04819e-14
APBB2	0.71426	2.49797e-33		GINS4	-0.442397	2.0568e-14
ZNF703	0.771902	2.579e-33		VRK1	-0.550636	2.18462e-14
PDE9A	-0.595618	3.40413e-33		PPFIBP1	-0.469386	2.56972e-14
MCM2	-0.996822	3.79634e-33		ITGA5	0.70971	3.27617e-14
CARS	0.814582	3.83343e-33		MFSD6	0.466709	3.61599e-14
MT1G	2.37833	6.05598e-33		NUP98	-0.320874	3.65952e-14
HERPUD1	0.624135	6.85425e-33		NA	1.14209	4.95564e-14
EFCAB12	-1.14388	7.5262e-33		DHCR24	-0.394031	4.98803e-14
FAM83D	-0.708165	8.50323e-33		STEAP4	-3.05011	4.98803e-14
NOL6	-0.63827	8.98589e-33		SLC45A3	-0.383127	5.01182e-14
HNRNPF	-0.530731	9.69837e-33		TOP3A	-0.336277	5.07826e-14
ALDH2	1.07498	1.06734e-32		CCNB2	-0.428817	5.20688e-14
MTOR	-0.576777	1.30481e-32		ADRA1A	1.68095	5.61701e-14
ISG20L2	-0.610068	1.32784e-32		TOR1AIP1	0.420797	5.80892e-14
SARS	0.790928	1.34379e-32		ABCG1	0.753691	6.10182e-14
GINS4	-0.659966	1.34379e-32		BUB1	-0.504779	7.02832e-14
MTHFR	0.613732	1.50173e-32		ASNSP1	1.56354	7.42658e-14
FANCA	-0.69114	1.51279e-32		FOXM1	-0.401607	7.58261e-14
NDRG1	-0.681427	2.07209e-32		WBP11	-0.386404	7.69126e-14
ELOVL7	-1.42799	2.39879e-32		CRKL	-0.281414	7.76206e-14
KPNA2	-0.527801	2.39879e-32		MCM8	-0.469287	8.2021e-14
DUSP16	0.485351	2.42036e-32		CLSTN3	0.571736	8.69477e-14
RELN	1.37076	3.45002e-32		IPO9	-0.27024	8.86022e-14
PARP8	0.871076	3.9724e-32		NCOA7	0.578686	9.5628e-14
SERINC3	0.515573	4.07647e-32		NUP205	-0.382768	9.5628e-14
YWHAH	-0.593655	5.47295e-32		SELENBP1	0.548999	9.80985e-14
KIF20A	-0.732271	6.8161e-32		AC092718.4	-0.926657	1.17029e-13
DNASE2	0.955202	9.33116e-32		CCT6A	-0.377726	1.19021e-13
SHCBP1	-0.654448	1.24671e-31		KNSTRN	-0.470748	1.276e-13
ADRB2	-0.805019	1.7165e-31		NUPR1	0.950385	1.31381e-13
ADAMTS1	-0.419881	1.76065e-31		HOXC13-AS	1.0854	1.31504e-13
DGKH	1.02766	1.79168e-31		CDC45	-0.415279	1.45691e-13
DIAPH1	-0.479854	3.09646e-31		UGT2B28	-2.35401	1.49334e-13
HMGCS2	1.01417	3.92774e-31		GUSBP3	0.706899	1.49334e-13
URB1	-0.534341	4.70647e-31		DUSP16	0.321026	1.63569e-13
UBE2H	0.416302	4.98078e-31		EFNA5	-0.342848	1.6705e-13
TUBA3D	-3.5676	5.27432e-31		SLC35F2	-0.359569	1.90216e-13
PCNA	-0.720757	7.78813e-31		GPT2	0.50191	1.97591e-13
EFNA5	-0.515356	8.74502e-31		WDHD1	-0.502916	2.0774e-13
CHD7	-0.655483	8.94853e-31		SMARCD3	0.691326	2.08353e-13
SVIL	1.14284	9.49795e-31		ACSL1	0.331141	2.28409e-13
KPNB1	-0.421107	1.00476e-30		DDX10	-0.376798	3.26035e-13
MELK	-0.60363	1.09485e-30		NPPC	-1.94646	3.50991e-13
STC2	0.931976	1.36784e-30		NCAPH	-0.450125	3.658e-13
GEMIN5	-0.558869	1.55279e-30		PRKAR2A	-0.251987	3.73671e-13
IL1RN	1.65887	1.68514e-30		ABHD2	-0.367529	3.73671e-13
NCOA2	0.500282	3.15882e-30		ELOVL7	-0.912025	3.75224e-13
CROT	-1.04057	4.06162e-30		CENPO	-0.390145	3.77406e-13
C16orf45	1.55945	4.68858e-30		MAP3K4	-0.391972	3.789e-13
GINS2	-0.849777	7.44674e-30		PLD3	0.529709	3.85932e-13
GABARAPL1	0.786744	7.50029e-30		ZNF587B	-0.447696	4.01319e-13
NCAPH	-0.674387	7.52679e-30		C16orf45	1.0689	4.16245e-13
CBFA2T2	0.589054	7.55801e-30		KCNG1	0.993261	4.47415e-13
PABPC4	-0.378402	8.39486e-30		RBM12	-0.347451	4.69262e-13
SHROOM3	-0.480335	1.63892e-29		JDP2	0.697995	4.86354e-13
LUZP2	0.704664	1.76902e-29		NEBL	0.894373	5.01611e-13
SUSD6	0.664175	1.98208e-29		DMGDH	1.52293	5.24624e-13
FANCI	-0.561809	2.08523e-29		CDC20	-0.529859	5.48314e-13
CDYL2	-0.594809	2.13877e-29		EAF2	-1.2376	5.89989e-13
PLPP1	-0.532816	2.14339e-29		MGME1	-0.394791	6.03914e-13
DCAF6	-0.511995	3.22675e-29		GINS1	-0.470396	6.15649e-13
GTPBP4	-0.585001	3.39608e-29		MTHFD1	-0.292287	6.48342e-13
ATF3	0.913542	3.61169e-29		CAMK2N1	0.61165	6.94858e-13
MAK	-1.91096	3.63487e-29		CKAP5	-0.322509	7.23899e-13
GTSE1	-0.55476	4.48661e-29		YPEL2	0.740215	7.78642e-13
ATP2B1	0.91855	4.54269e-29		CBWD1	-0.503652	8.5755e-13
KALRN	1.13296	4.79725e-29		CDK2	-0.362118	8.57716e-13
AC092894.1	2.02088	4.87349e-29		PIK3R3	0.284118	8.6722e-13
ME1	0.813713	6.82377e-29		DAPK2	0.978119	9.8692e-13
EXOSC2	-0.55153	7.57356e-29		CEBPB	0.793116	1.04368e-12
CDC42EP3	-0.692339	9.11627e-29		COL16A1	2.13075	1.16452e-12
YPEL2	1.07109	1.05582e-28		CDYL2	-0.389958	1.75725e-12
SPAG5	-0.570197	1.15585e-28		CDCA8	-0.421122	2.00303e-12
HNRNPAB	-0.753197	1.17811e-28		IGFBP3	0.622773	2.00303e-12
AC092718.4	-1.34653	1.61166e-28		RBM14	-0.344086	2.21339e-12
VLDLR-AS1	2.1855	1.61443e-28		URB2	-0.468824	2.34776e-12
CCNG2	1.21514	1.72658e-28		RAD54L	-0.456268	2.5823e-12
CCDC86	-0.803082	1.79205e-28		HSPH1	-0.518021	2.59754e-12
HASPIN	-0.681386	1.94429e-28		TUBA1A	0.606923	2.82853e-12
RPS6KA2	0.653906	2.23318e-28		GFM1	-0.362838	2.98761e-12
MYBL2	-0.734626	2.47852e-28		CTPS1	-0.298033	3.26801e-12
SLC16A6	-1.48632	2.76603e-28		FANCA	-0.423774	3.41372e-12
NNMT	-1.85327	3.55688e-28		KIF23	-0.452522	3.51101e-12
SERBP1	-0.403675	4.13761e-28		FTH1	0.566587	3.57711e-12
CLSTN3	0.801098	4.26346e-28		PER3	-0.339308	3.81241e-12
ADRA1A	2.29344	4.74471e-28		XRCC5	-0.3473	4.08243e-12
URB2	-0.701953	5.75267e-28		JUND	0.626294	4.09814e-12
ZNF587B	-0.649094	6.00336e-28		ORC6	-0.476438	4.41074e-12
ZNF812P	-1.80811	8.61728e-28		ENDOD1	-0.325983	4.84698e-12
SLC22A3	0.443388	8.91134e-28		COLEC12	0.576807	5.33409e-12
SFXN2	-0.52569	9.08385e-28		TNS3	-1.47712	5.4189e-12
TARS	0.469555	9.59401e-28		TRGC1	-1.36354	5.85175e-12
CCNF	-0.725637	1.01085e-27		PPRC1	-0.41071	5.96608e-12
CRKL	-0.393558	1.02568e-27		TBC1D30	-0.352789	6.26236e-12
CMC2	-0.768232	1.0307e-27		KIF18B	-0.451987	6.26236e-12
RACGAP1	-0.47583	1.14279e-27		NT5DC3	-0.492293	6.62073e-12
SIAH1	0.711675	1.14279e-27		PRSS8	0.630081	7.05827e-12
UTP4	-0.627248	1.40693e-27		ME1	0.528401	7.27819e-12
ELOVL5	-0.736104	2.20104e-27		TPD52	-0.499851	7.34903e-12
XRCC3	-0.840097	2.20818e-27		ST6GALNAC4	0.750349	7.7876e-12
KCND2	-1.4898	2.40174e-27		IRF2BPL	0.367275	7.89928e-12
MDC1	-0.877839	2.44367e-27		NA	1.6279	8.26787e-12
UCK2	-0.525665	2.56228e-27		FAM219B	0.441784	8.38345e-12
KIAA1324	1.08683	2.95319e-27		DUSP8	0.529827	8.67435e-12
EXO1	-0.795745	3.11529e-27		CDCA7	-0.482069	9.02985e-12
AURKA	-0.516201	3.14073e-27		ADRB2	-0.491299	9.02985e-12
ZBTB43	0.57228	3.40897e-27		PER1	-0.583259	9.3995e-12
CPSF7	-0.503407	3.42378e-27		CDKN3	-0.514444	9.47755e-12
PKMYT1	-0.808095	3.62426e-27		ELF3	0.663324	1.02444e-11
SLC38A4	-4.83826	3.74136e-27		PABPC4	-0.23828	1.0299e-11
ZNF367	-0.925433	4.04829e-27		RFC3	-0.492341	1.20052e-11
LARP6	1.02686	4.04909e-27		ZNF629	0.714586	1.2608e-11
CDCA8	-0.618172	4.07516e-27		TICRR	-0.493876	1.27706e-11
TMEM109	-0.682285	4.66889e-27		APBB2	0.430288	1.40018e-11
SLC41A1	-0.541654	6.39531e-27		TEX2	-0.304543	1.4841e-11
STXBP1	0.580108	7.15757e-27		TSR1	-0.353838	1.53063e-11
NBPF1	0.587665	7.19067e-27		FURIN	0.522106	1.59199e-11
CDCA5	-0.645001	9.80051e-27		LTF	1.98753	1.69081e-11
EHF	-0.550592	9.89717e-27		WDR3	-0.356223	1.69081e-11
TUBA1A	0.884608	1.00849e-26		C1orf21	-0.305982	1.77139e-11
NAT10	-0.447872	1.28055e-26		SNHG1	-0.439477	1.78924e-11
TLE3	0.583233	1.28055e-26		NOS3	1.71187	1.81337e-11
TBC1D1	-0.471353	1.54931e-26		ERBB2	0.479794	1.83678e-11
AEN	-0.599719	1.74494e-26		GSR	-0.273129	2.10106e-11
MFHAS1	-0.499627	1.9755e-26		MYO5C	-0.324092	2.17174e-11
ZNF239	-0.633837	2.0764e-26		NSMAF	-0.392127	2.18902e-11
TBRG1	-0.462851	2.24118e-26		GINS3	-0.512982	2.23003e-11
SKP2	-0.844091	2.40849e-26		LUZP2	0.44267	2.26186e-11
TNFSF15	1.04394	2.8469e-26		NEDD4L	-0.259567	2.27546e-11
DPYSL2	0.571099	3.04053e-26		SUSD6	0.418867	2.6248e-11
CPEB4	0.642252	3.1984e-26		ERAP1	0.61071	2.67382e-11
TBX15	-2.53911	3.47874e-26		KIAA1324	0.725478	2.69227e-11
WDHD1	-0.697449	3.57225e-26		NUSAP1	-0.464038	2.77913e-11
NBR2	0.932134	3.61432e-26		SCML2	-0.480282	2.98383e-11
NUP85	-0.539819	3.79156e-26		NUP160	-0.348607	3.17381e-11
SRSF2	-0.459852	4.54383e-26		FEN1	-0.410422	3.38696e-11
CALCOCO2	0.437322	4.99033e-26		ZYX	0.576639	3.49871e-11
ERMAP	0.982332	5.982e-26		CEP55	-0.524822	3.72147e-11
QSOX2	-0.538924	6.54221e-26		DCLRE1B	-0.410114	3.74441e-11
MAP1LC3B	0.712111	7.82636e-26		EHF	-0.356098	3.83181e-11
PHGDH	0.811601	8.04491e-26		GPRC5C	0.87732	4.18327e-11
TACC1	-0.475031	8.07056e-26		DGKH	0.611347	4.2529e-11
TRAK2	0.607014	9.25684e-26		CENPL	-0.446749	4.39513e-11
MGLL	-0.751983	9.68941e-26		CCDC58	-0.473464	4.63825e-11
FERMT1	-0.690117	9.68941e-26		NUP50	-0.295878	5.02654e-11
DNAAF5	-0.592019	9.69767e-26		TLE3	0.377146	5.05481e-11
NOP2	-0.660074	1.11656e-25		TPD52L1	0.458224	5.46624e-11
ANLN	-0.62878	1.15251e-25		TARS	0.296558	5.71451e-11
CNKSR2	-0.986241	1.27976e-25		RRP15	-0.426345	6.54359e-11
CAD	-0.621644	1.29901e-25		SLC25A37	-0.294823	6.65292e-11
NUP50	-0.448867	1.29969e-25		YARS	0.358368	6.65633e-11
RBM14	-0.490028	1.3627e-25		ASPH	0.274672	6.76955e-11
ERAP1	0.89047	1.44299e-25		MCM5	-0.386864	6.91869e-11
CDCA2	-0.545608	1.46575e-25		PARP3	0.704154	6.99242e-11
SLC3A2	0.674069	1.87514e-25		CRAT	0.619138	7.22058e-11
CHEK1	-0.704354	2.17248e-25		ZCCHC24	0.419436	7.63092e-11
SLC1A5	0.736341	2.63599e-25		SLC41A1	-0.344692	7.78537e-11
PRPS1	-0.455632	3.23257e-25		CYP1A1	1.51841	8.67549e-11
PSPH	0.713875	3.72178e-25		WDR82	-0.216966	8.93232e-11
PPFIBP1	-0.615042	3.89161e-25		DHFR	-0.349715	9.6066e-11
MARS	0.586253	6.60868e-25		TCP1	-0.294936	9.70629e-11
KNSTRN	-0.62929	6.98252e-25		GNG7	0.640651	1.05494e-10
TMEM100	-5.15817	7.27571e-25		GTPBP4	-0.354012	1.07967e-10
MANBA	0.744839	9.30727e-25		PUM3	-0.451851	1.08263e-10
WDR5	-0.520761	9.9682e-25		ASCC3	-0.520623	1.136e-10
PLXDC2	0.900488	1.18381e-24		REXO5	-0.407614	1.15339e-10
CHAF1B	-0.692458	1.40093e-24		PIK3IP1	0.697761	1.22196e-10
ESPL1	-0.565839	1.40362e-24		SLC4A4	-0.543434	1.26902e-10
TFAP4	-0.764718	1.45881e-24		FOXD4	-0.74052	1.38932e-10
ZNF217	0.462402	1.53417e-24		BRCA1	-0.405672	1.44963e-10
ANK3	0.511556	1.62538e-24		DHX9	-0.285955	1.476e-10
MKI67	-0.707029	1.80235e-24		ICA1	0.339554	1.57875e-10
NUP205	-0.506386	1.80454e-24		BEND4	-0.63841	1.75364e-10
CLIC4	0.933079	2.27516e-24		NCOR1	-0.255229	1.79615e-10
NBR1	0.421854	3.28504e-24		PLEKHB1	0.432746	2.0064e-10
NA	-0.552202	3.62118e-24		MPHOSPH9	-0.554578	2.06537e-10
NIPAL1	1.06349	3.92721e-24		DHX15	-0.368726	2.16367e-10
ALDH1B1	-0.454717	4.30829e-24		POLA1	-0.367375	2.16624e-10
STARD7	-0.383731	6.94345e-24		RFC5	-0.387042	2.18787e-10
PRC1	-0.42513	7.06488e-24		PRKD1	0.304361	2.24138e-10
SLC12A6	0.693507	7.65119e-24		HSPA5	0.288816	2.3572e-10
SSRP1	-0.54329	7.90146e-24		DHX33	-0.335569	2.40543e-10
NPPC	-3.01234	8.67131e-24		PCTP	-0.576682	2.40543e-10
C3orf58	-1.33468	1.14097e-23		PDSS1	-0.462188	2.49835e-10
MRPS25	-0.475753	1.40222e-23		PTBP1	-0.299531	2.58109e-10
COLEC12	0.790732	1.69005e-23		SRSF2	-0.28975	2.58109e-10
GINS1	-0.628508	1.89024e-23		NOP58	-0.391265	2.66004e-10
FURIN	0.732002	1.92912e-23		OTULIN	-0.485428	3.20137e-10
NASP	-0.797123	2.00479e-23		BAMBI	0.564601	3.21996e-10
GEMIN4	-0.622198	2.04408e-23		SERBP1	-0.243138	3.35477e-10
DDX10	-0.49426	2.05391e-23		MKI67	-0.456611	3.38318e-10
HILPDA	-0.688155	2.20782e-23		AGPAT2	0.75933	3.53808e-10
ZNF528-AS1	0.839041	2.41696e-23		MPC2	-0.421424	3.64685e-10
GPNMB	1.53392	2.84432e-23		C3orf58	-0.863803	3.64685e-10
TCP11L2	1.24088	3.15698e-23		ZNF850	-0.627823	3.73594e-10
ASNSP1	1.96941	3.73729e-23		MRAS	0.53314	3.95476e-10
TGM3	1.77199	3.85098e-23		SLBP	-0.371801	3.96903e-10
NCKAP5L	0.963047	4.0988e-23		ELOA	-0.273912	4.01587e-10
POLA1	-0.544649	4.53036e-23		SLC9A2	-0.399014	4.25706e-10
REXO5	-0.594014	4.71431e-23		SRSF7	-0.299198	4.432e-10
AC073869.1	-0.790679	4.7495e-23		ABR	0.456479	4.432e-10
SEMA6A	0.580808	5.49683e-23		AGO2	-0.331295	4.61136e-10
IRF2BPL	0.506924	5.58328e-23		DHRS2	-0.607549	4.66827e-10
TM7SF2	0.811922	5.59757e-23		NOL9	-0.352943	4.96263e-10
PMM2	-0.518286	5.79178e-23		VGLL4	0.273006	5.15951e-10
TTC39B	0.982348	5.83004e-23		SCD	0.325695	5.66883e-10
DENND1B	0.982041	5.92135e-23		NA	0.664704	5.66883e-10
APH1B	0.878671	6.32162e-23		EPHA1	0.628703	6.213e-10
EMP2	-0.619081	6.35149e-23		EXOSC2	-0.322983	6.56108e-10
ELOA	-0.409128	6.40845e-23		HOXC13	0.595091	6.75232e-10
GGA2	-0.398493	6.40845e-23		MDC1	-0.524533	7.37704e-10
SF3B3	-0.324583	6.61785e-23		PSAP	0.342405	7.42545e-10
CREB3L2	0.382844	6.67601e-23		TMEM181	0.394222	7.77625e-10
MYLK	1.16381	6.8126e-23		BSDC1	0.366385	7.82274e-10
DHX33	-0.495142	7.13523e-23		PGC	-1.86736	7.92576e-10
PDSS1	-0.68374	7.57111e-23		ZWILCH	-0.635322	8.03434e-10
NUPR1	1.22104	7.70982e-23		BEX2	0.618216	8.10845e-10
CCT6A	-0.484407	7.73285e-23		TTF2	-0.361627	8.17918e-10
SPDEF	-0.717168	7.75497e-23		NUP88	-0.318095	8.3027e-10
PTBP1	-0.444409	7.98916e-23		AURKB	-0.386918	8.36044e-10
E2F2	-0.773958	8.13266e-23		SNRPA1	-0.351455	8.56e-10
ANTXR1	0.837844	8.35526e-23		LRIG1	-0.307575	9.50922e-10
DNMT1	-0.738025	8.65682e-23		FNIP2	-0.330478	9.58553e-10
ICMT	-0.454297	8.88516e-23		SRRM1	-0.289724	9.75583e-10
NUP160	-0.493018	9.05008e-23		TIMM21	-0.394982	9.76839e-10
UTP20	-0.528983	9.58973e-23		NCAPG2	-0.342709	1.04034e-09
PRPF4	-0.416027	1.04476e-22		PPIF	-0.324105	1.06633e-09
EPN2	-0.460997	1.15024e-22		TNPO2	-0.301739	1.06971e-09
PFKFB3	-0.726457	1.39908e-22		USP7	-0.340065	1.07045e-09
NOLC1	-0.586613	2.20839e-22		HASPIN	-0.396235	1.08886e-09
MARS2	-0.598413	2.28083e-22		DBNDD1	0.461852	1.09027e-09
SNRPA1	-0.528191	2.33011e-22		TMEM201	-0.395504	1.14545e-09
IPO9	-0.338763	2.54155e-22		B4GALNT1	0.645262	1.18601e-09
NOP56	-0.664772	2.67074e-22		MKNK2	0.346381	1.21486e-09
RNF19A	0.894451	3.23595e-22		STARD7	-0.244039	1.2484e-09
BUB1B	-0.569027	3.62657e-22		AADAT	-0.410852	1.30141e-09
SLC29A1	-0.804454	3.72052e-22		PPP2R2C	0.449262	1.36267e-09
VRK1	-0.671023	4.58561e-22		ZNF239	-0.381521	1.39331e-09
ADPGK	-0.41939	5.04456e-22		EYA3	-0.273063	1.45125e-09
PHYH	0.731152	5.04848e-22		MANBA	0.471365	1.5213e-09
CTTNBP2NL	0.491199	5.54506e-22		SF3B3	-0.209504	1.64995e-09
POLR3E	-0.627216	5.79597e-22		ALKBH8	-0.544812	1.68466e-09
POLE3	-0.580656	6.39021e-22		SRSF1	-0.223783	1.70808e-09
DRAIC	0.840462	6.52241e-22		MFHAS1	-0.299964	1.70808e-09
MKNK2	0.520179	6.66432e-22		POLE3	-0.380874	2.04576e-09
NSMAF	-0.536784	7.48354e-22		TP53INP1	0.603865	2.05782e-09
MOCOS	0.473812	8.0428e-22		PER2	-0.389714	2.06041e-09
PA2G4	-0.637984	9.45359e-22		KLF5	-0.862941	2.13546e-09
COLGALT1	-0.472051	1.22677e-21		TES	0.343218	2.17983e-09
DMGDH	1.89501	1.35975e-21		MAK	-0.988721	2.20703e-09
RFX3	0.888632	1.36466e-21		POLR1B	-0.358673	2.35616e-09
JAG1	-0.458621	1.38255e-21		TMEFF2	-0.349105	2.56091e-09
MT1X	1.07577	1.41978e-21		GSTCD	-0.402207	2.59756e-09
MME	0.584043	1.71332e-21		CALCOCO2	0.266095	2.69987e-09
H1F0	-0.363068	1.78226e-21		CCNF	-0.418033	2.7322e-09
ALCAM	0.558505	2.29699e-21		PTTG1	-0.445031	2.79265e-09
SLC35F2	-0.4443	2.39172e-21		SLC48A1	0.432579	3.18981e-09
TTLL4	-0.661718	2.44276e-21		OPTN	0.968452	3.33882e-09
PTDSS1	-0.466528	2.46268e-21		NBR2	0.565039	3.46799e-09
TANC1	0.345899	2.81603e-21		RAB3B	-0.313277	3.66609e-09
AFG3L2	-0.364713	2.95788e-21		MAOA	-0.2668	3.7328e-09
SUPT16H	-0.457834	3.24833e-21		CTH	0.621644	3.87382e-09
RFC3	-0.658465	3.27442e-21		POLR3A	-0.219298	3.87382e-09
LINC00662	0.753338	3.49592e-21		PTP4A3	0.717666	3.9661e-09
GNG7	0.871561	3.55052e-21		CYP2U1	-0.519157	3.98819e-09
LIMCH1	-0.416054	3.79576e-21		ZCCHC2	-0.332392	4.00012e-09
F2RL1	-0.622036	3.89399e-21		G6PD	0.402719	4.00012e-09
MPHOSPH9	-0.787244	4.07578e-21		HNRNPF	-0.278502	4.07453e-09
FNIP2	-0.481292	4.386e-21		CADPS2	-0.457984	4.14994e-09
PIK3IP1	0.957476	4.91162e-21		ORC1	-0.381992	4.16057e-09
ZNF419	0.655408	4.95369e-21		CACNA1D	0.750312	4.407e-09
WDR82	-0.299756	5.45602e-21		PYCR1	0.47151	4.407e-09
SLC4A4	-0.758264	6.8648e-21		CLIC4	0.570589	4.63021e-09
DUSP8	0.690284	6.92075e-21		EXO1	-0.455123	4.85392e-09
MCTP1	1.70225	7.67685e-21		TUBA3D	-1.36053	5.1115e-09
IMPDH1	-0.638559	8.76842e-21		TRPV6	0.433085	5.39982e-09
RCC1	-0.761418	8.94081e-21		TGM3	1.15121	5.40364e-09
MPZL1	-0.347783	9.54657e-21		PITPNB	-0.381988	5.40364e-09
BZW2	-0.543632	9.93913e-21		PIK3AP1	-0.667235	5.43203e-09
LPAR3	-0.542786	1.08359e-20		LDLR	-0.431624	5.47435e-09
KNOP1	-0.435914	1.19261e-20		TENM1	-0.812121	5.67697e-09
CAMKK2	-0.44494	1.28465e-20		SHC2	1.36467	5.68318e-09
KIF4A	-0.462442	1.43787e-20		ITGA3	0.6065	5.89154e-09
ITGA5	0.837735	1.49211e-20		WDR43	-0.370451	5.92833e-09
NFKBIA	-0.536476	1.58594e-20		CUEDC1	0.644033	6.12339e-09
GUSBP3	0.843561	1.61902e-20		QTRT2	-0.312238	6.27244e-09
SESN3	1.15516	1.98733e-20		SLC16A6	-0.794825	6.31926e-09
ZMIZ1	-0.668741	2.04395e-20		STXBP1	0.340562	6.31926e-09
PAXIP1	-0.529763	2.04937e-20		PRPS1	-0.270589	6.46583e-09
SNHG1	-0.581813	2.13684e-20		C6orf48	0.514147	6.69976e-09
KIF22	-0.688247	2.21778e-20		PTPN21	-0.452046	6.76338e-09
AGO2	-0.468375	2.24932e-20		FUT1	0.659313	7.82121e-09
TACC3	-0.763241	2.49483e-20		UTP25	-0.334585	7.88179e-09
COQ8A	-0.609875	2.548e-20		AKTIP	0.394711	7.98478e-09
BRD2	-0.302095	2.61023e-20		EIF4E	-0.361816	8.00371e-09
EME1	-0.634095	2.63024e-20		CSGALNACT1	-1.08652	8.05797e-09
NAV3	-0.680416	2.63966e-20		CHORDC1	-0.41556	8.11428e-09
MRAS	0.728952	2.67475e-20		SLC44A4	0.437874	8.29112e-09
ABAT	0.445056	2.823e-20		SLC39A13	0.744685	8.43742e-09
IFRD1	0.772256	2.91726e-20		DNAJC9	-0.346718	9.17189e-09
EXOSC9	-0.594496	3.21053e-20		CHEK1	-0.411693	9.21437e-09
POLR1B	-0.524551	3.61771e-20		CS	-0.217042	1.02524e-08
AGO4	0.530759	3.70544e-20		NOL6	-0.326196	1.06662e-08
PSMC3IP	-0.638698	3.77106e-20		CYFIP2	0.332183	1.09765e-08
ESRP2	-0.541179	3.92817e-20		MBNL1	-0.416029	1.09913e-08
EFTUD2	-0.449029	3.92817e-20		DNAJC2	-0.394275	1.12463e-08
CENPL	-0.591944	4.158e-20		TP53I11	0.437786	1.12854e-08
TNS3	-1.94186	4.1937e-20		GTF3C2	-0.31809	1.138e-08
MGME1	-0.482741	4.43327e-20		TTLL4	-0.421176	1.1691e-08
CTH	0.896035	4.44523e-20		ZBTB24	-0.354745	1.17995e-08
RHBDD1	0.539149	4.53039e-20		E2F8	-0.437681	1.25364e-08
ZBTB10	-1.31645	4.63306e-20		CRLF3	-0.522795	1.37585e-08
RRM1	-0.473597	4.80752e-20		CCNA2	-0.486588	1.413e-08
KLF15	-0.721921	5.2651e-20		EME1	-0.412371	1.51045e-08
ABCA1	1.72165	5.4382e-20		KLHL35	0.751536	1.51846e-08
TIMELESS	-0.505799	5.45185e-20		ASAP3	0.631818	1.56159e-08
RALGPS1	0.684709	5.66961e-20		CPT1A	-0.30751	1.5749e-08
HSPA13	0.772725	5.72417e-20		JPT2	-0.272841	1.61613e-08
GRPEL1	-0.528785	5.93479e-20		TRPS1	0.347958	1.74713e-08
RBM12	-0.42254	7.96808e-20		TCP11L2	0.785832	1.80979e-08
SLC48A1	0.621839	8.01935e-20		E2F7	-0.523825	1.82712e-08
PSME3	-0.333354	8.37602e-20		CERS4	0.533374	1.83282e-08
FOXD4	-1.00681	9.12141e-20		MAK16	-0.363658	1.85683e-08
PARP3	0.924338	9.93466e-20		ANK3	0.299881	1.8585e-08
SALL2	0.641809	9.98244e-20		RIMS3	0.848365	1.94739e-08
DEGS1	-0.711171	1.07273e-19		FANCD2	-0.332618	2.12575e-08
CDC20	-0.645766	1.1013e-19		ETF1	-0.266164	2.1586e-08
TIMM21	-0.55721	1.20129e-19		XPO6	-0.203111	2.18141e-08
LRP8	-0.564368	1.30901e-19		RFC4	-0.335364	2.33143e-08
CS	-0.324938	1.32514e-19		SPATA20	0.404506	2.44572e-08
PITHD1	-0.539794	1.49928e-19		SLC10A7	-0.491526	2.49979e-08
SLC9A2	-0.550525	1.64852e-19		TARDBP	-0.243974	2.5346e-08
BAMBI	0.760942	1.8392e-19		ICMT	-0.273824	2.6182e-08
NCAM2	0.454613	1.85476e-19		UNG	-0.293955	2.6739e-08
TMPO	-0.481394	1.8569e-19		STX3	0.295787	2.73419e-08
SRRM1	-0.406954	1.88336e-19		CTDSP2	0.291221	2.73419e-08
ZBED3	0.562422	1.89132e-19		CCT5	-0.262183	2.7366e-08
RFC4	-0.510318	1.89444e-19		ISG20L2	-0.304637	2.76045e-08
ICA1	0.448873	1.98502e-19		EGFL7	0.652334	2.89488e-08
SNHG16	-0.39058	2.04468e-19		LCP1	-0.34984	2.90035e-08
KHSRP	-0.422873	2.22315e-19		NOL11	-0.438812	2.95387e-08
TMEM181	0.541188	2.23246e-19		CHAF1B	-0.39839	3.01798e-08
RNF144B	1.04995	2.30507e-19		ELOVL5	-0.400735	3.0523e-08
WDR62	-0.574217	2.42199e-19		TRIM16L	0.554086	3.14419e-08
AKAP1	-0.864846	3.07684e-19		CTIF	0.60396	3.16205e-08
DCAF1	-0.488526	3.20419e-19		KALRN	0.615847	3.21766e-08
FAM219B	0.552942	3.46152e-19		ESRP1	0.37843	3.22454e-08
NUP88	-0.441297	3.78152e-19		UMPS	-0.36185	3.23909e-08
HJURP	-0.486737	3.83884e-19		ZSCAN30	0.527227	3.38771e-08
ERCC6L	-0.731176	3.97292e-19		BAZ1A	-0.349878	3.39002e-08
TUBB	-0.533172	4.00925e-19		VOPP1	0.39341	3.44185e-08
WDR43	-0.54004	4.04356e-19		2006-09-01	0.417779	3.49351e-08
CYP4V2	0.686651	4.19744e-19		SIAH1	0.393432	3.60404e-08
ATP1B1	0.610294	4.2684e-19		DLAT	-0.349547	3.7882e-08
SMARCD3	0.806799	4.28626e-19		EPHX1	0.385974	3.85003e-08
E2F7	-0.786676	4.56246e-19		KIF15	-0.479398	3.89472e-08
GMNN	-0.59951	4.80967e-19		EFCAB12	-0.551723	3.93281e-08
TTLL12	-0.556007	4.83666e-19		ARHGAP28	-0.567305	3.94161e-08
NA	-0.865593	4.86887e-19		CROT	-0.530899	4.06285e-08
NARS	0.409071	5.00906e-19		STIL	-0.410814	4.08321e-08
FBXO5	-0.789493	5.79696e-19		NDUFA4L2	1.20833	4.12475e-08
CD3EAP	-1.13155	5.9346e-19		EXOSC9	-0.376138	4.12545e-08
TENT4A	-0.444559	6.10909e-19		MOGAT2	-1.66781	4.12777e-08
HAUS8	-0.836954	6.10909e-19		GALNT10	0.370662	4.27188e-08
ASAP2	0.573222	6.10909e-19		VASN	0.52402	4.32304e-08
CYTH1	-0.488944	6.3565e-19		FN1	0.326569	4.37574e-08
EIF2AK4	-0.340148	6.46443e-19		KIF22	-0.431639	4.4199e-08
PPP2R5B	0.846624	6.74489e-19		VEGFA	0.430349	4.43296e-08
BIRC5	-0.482698	8.00594e-19		MUS81	0.475017	4.43358e-08
PLK1	-0.524726	8.37089e-19		COL4A3BP	-0.414766	4.76988e-08
COL16A1	2.52745	8.83574e-19		NAT10	-0.244895	4.8119e-08
EAF2	-1.47216	9.10621e-19		PCBP4	0.59065	4.83577e-08
CRAT	0.801277	9.12601e-19		FAM114A1	0.247429	4.99294e-08
ZBTB24	-0.517436	9.56775e-19		AL162582.1	0.532974	4.99803e-08
NUP98	-0.362971	1.05974e-18		CNKSR2	-0.543014	5.03092e-08
TUBG1	-0.60984	1.11187e-18		CCDC92	0.514218	5.09361e-08
CACNA1D	1.04533	1.14648e-18		GMNN	-0.38875	5.1888e-08
FUT1	0.939586	1.14648e-18		NA	-1.06262	5.46472e-08
TOMM40	-0.624042	1.22811e-18		MACROD1	0.594533	5.57403e-08
PTPRJ	-0.61765	1.23326e-18		DDR1	0.427461	5.65701e-08
FANCC	-0.519719	1.26472e-18		CLN6	-0.292754	5.68554e-08
GRWD1	-0.597171	1.31314e-18		SERINC3	0.256929	6.08209e-08
CDCP1	-0.408719	1.31314e-18		SIPA1L2	-0.269419	6.20615e-08
NCOR1	-0.33755	1.31586e-18		GLIS2	0.64432	6.31602e-08
SQSTM1	0.63622	1.35712e-18		FAM69B	0.575653	6.32206e-08
LGALS8	0.719835	1.64086e-18		ZNF703	0.37812	6.57622e-08
ZCCHC2	-0.469618	1.6544e-18		MT1X	0.657875	6.61511e-08
CEBPB	0.941791	1.76268e-18		PLA2G6	0.396555	7.1474e-08
FGF13	1.56619	2.11559e-18		FRYL	-0.531162	7.26733e-08
DNAJC9	-0.499127	2.11738e-18		ZNF528-AS1	0.501108	7.57143e-08
MYRIP	0.506951	2.12933e-18		PDE9A	-0.285635	7.70174e-08
CCDC92	0.758783	2.15138e-18		SRPK1	-0.356289	7.99122e-08
ZKSCAN1	0.411929	2.15169e-18		FBXO5	-0.504518	8.2093e-08
FAM174B	-0.528346	2.24986e-18		PHYH	0.439493	8.65566e-08
MRTO4	-0.611134	2.39468e-18		NA	-0.551088	8.75161e-08
WDR55	-0.401565	2.53077e-18		ZNF814	-0.400063	9.02402e-08
TSPAN31	0.721942	2.84165e-18		CDC23	-0.319314	9.05601e-08
PASK	-0.564194	2.84387e-18		PLK4	-0.487664	9.05601e-08
GART	-0.429486	2.85865e-18		IER5L	0.96772	9.08486e-08
DOT1L	-0.691054	2.87451e-18		PAICS	-0.287731	9.77294e-08
PRR5	-0.732989	3.11478e-18		NEK2	-0.442844	9.85101e-08
IGFBP3	0.736988	3.1432e-18		RETREG1	0.525993	1.00268e-07
SLC38A9	0.630276	3.65528e-18		SPATA13	-0.435358	1.00351e-07
RAB8A	-0.451761	4.09434e-18		PKNOX2	0.488553	1.02148e-07
FTH1	0.684512	4.22544e-18		KDM5B	0.233188	1.02729e-07
CDCA4	-0.69574	4.54061e-18		FYN	1.14821	1.07128e-07
HOXC13-AS	1.21809	4.55782e-18		PPM1M	0.889545	1.09179e-07
VGLL4	0.359164	4.58551e-18		FBXO44	0.573683	1.11355e-07
C2orf72	-1.33014	4.70984e-18		CDKN1A	0.369723	1.1147e-07
AMER1	-0.526618	4.96464e-18		MB	0.46044	1.11985e-07
GCNT1	-0.675346	5.109e-18		ZNF367	-0.483282	1.16698e-07
SPTLC3	0.817596	5.24699e-18		TFRC	-0.363525	1.1813e-07
DNAJC11	-0.561054	5.2611e-18		GYG1	-0.313718	1.20689e-07
PLK2	-0.526475	5.3061e-18		HEATR1	-0.374638	1.20816e-07
PIMREG	-0.568498	5.51236e-18		PFKFB3	-0.418648	1.2161e-07
PWP2	-0.725259	5.52716e-18		DEPDC1	-0.898474	1.22018e-07
ZNF530	-0.684317	6.60214e-18		KHSRP	-0.264148	1.27001e-07
HADHB	0.387984	6.709e-18		CIRBP	0.248406	1.28151e-07
TTF2	-0.483915	6.75532e-18		PHLDA1	-0.356272	1.30265e-07
MOGAT2	-3.01173	7.43985e-18		EMP2	-0.353965	1.30685e-07
E2F1	-0.60221	7.99441e-18		DNM1L	-0.464368	1.31284e-07
ARRDC3	0.774962	8.79468e-18		NUP107	-0.321315	1.3303e-07
GLIS2	0.948997	8.86843e-18		TENT4A	-0.282153	1.34431e-07
NAP1L4	-0.285074	9.051e-18		CHD7	-0.320949	1.35024e-07
SLC30A1	0.821392	9.19831e-18		PSME3	-0.205789	1.39445e-07
ZSCAN30	0.761001	9.20703e-18		PKIG	0.667769	1.39504e-07
PRSS8	0.758761	9.37272e-18		APLN	-0.495867	1.40245e-07
NECTIN1	-0.62841	1.04469e-17		IDH3A	-0.281552	1.43724e-07
GPT2	0.56756	1.14506e-17		ADD3	0.33368	1.5584e-07
SHMT2	0.522971	1.27749e-17		TRIM36	-0.510838	1.61863e-07
TMEM38B	0.66367	1.37205e-17		C11orf49	0.423784	1.66901e-07
HIST1H2BJ	-0.753839	1.47007e-17		SLC30A1	0.537496	1.66922e-07
POLR2D	-0.476663	1.51391e-17		ANKH	-0.239199	1.67362e-07
HMOX1	1.20933	1.53179e-17		C2orf72	-0.839923	1.73928e-07
TOB1	0.358775	1.53179e-17		DDIAS	-0.72466	1.74429e-07
PTPRK	0.644442	1.71237e-17		TMC4	0.492189	1.74429e-07
NOP16	-0.759849	1.72291e-17		ARNT2	0.454518	1.74429e-07
PDXDC1	-0.308912	1.79773e-17		TRIB1	0.450615	1.86318e-07
STEAP4	-3.40531	1.91475e-17		IPO11	-0.438973	1.8958e-07
NAPEPLD	0.714445	2.0585e-17		FBXO2	0.91581	1.9729e-07
CADPS2	-0.626421	2.11905e-17		EPRS	0.330329	2.0098e-07
LAPTM4B	0.486342	2.1533e-17		CCNG2	0.617027	2.08198e-07
BEX2	0.807732	2.17372e-17		TACC3	-0.456293	2.2358e-07
SFXN1	-0.466327	2.3457e-17		MYBL2	-0.369778	2.31575e-07
PGC	-2.70265	2.5322e-17		PITPNM1	0.611415	2.35231e-07
HSPH1	-0.607299	2.54654e-17		CKS2	-0.428076	2.47094e-07
JPH1	-0.845215	2.58934e-17		SUSD4	0.795462	2.47094e-07
GFPT1	0.433393	2.7814e-17		ERCC6L	-0.449591	2.49001e-07
ANKRD17	-0.391854	3.27514e-17		MAD2L1	-0.579498	2.49812e-07
IDH1	0.438046	3.36415e-17		CDON	0.432713	2.52699e-07
KLF9	0.439382	3.49516e-17		ABHD4	0.416742	2.52986e-07
GNL2	-0.455133	3.52857e-17		CFAP69	0.696726	2.5726e-07
RFC2	-0.633535	3.91805e-17		HOXC9	0.706186	2.79827e-07
TUBA4A	-0.582706	4.24659e-17		MAPRE1	-0.273826	2.81591e-07
DEPDC1B	-0.535373	4.40811e-17		HNRNPR	-0.234515	2.81591e-07
ITGA3	0.813892	4.6629e-17		TNPO3	-0.215392	2.82822e-07
RRP7BP	-0.848744	4.80323e-17		POLR2D	-0.307124	2.87028e-07
TAGLN2	-0.592968	4.89405e-17		RNF41	0.250049	2.87333e-07
SPC24	-0.527298	4.92471e-17		ZBTB16	-0.622765	2.90106e-07
PGPEP1	0.677138	5.23609e-17		AARS	0.494453	2.94752e-07
ARNT2	0.669746	5.26822e-17		MTMR9	-0.437469	3.00814e-07
PELI2	0.930215	5.55408e-17		EFL1	0.304165	3.02542e-07
PUM3	-0.560147	5.72467e-17		TCERG1	-0.331843	3.14183e-07
SLC9A7	0.434794	5.74873e-17		FKBP10	0.289461	3.14926e-07
FBXO9	0.433681	6.18584e-17		METAP1	-0.361554	3.23105e-07
MXI1	0.60235	6.18584e-17		IFNGR2	0.505623	3.25241e-07
SLC29A2	-0.572286	6.47731e-17		HPN	0.416959	3.27658e-07
ENTR1	-0.469061	6.92022e-17		THNSL2	0.325308	3.32321e-07
KDM1A	-0.340891	7.08427e-17		CPSF7	-0.256079	3.36656e-07
LRRC31	2.55487	7.70757e-17		EIF2AK4	-0.209291	3.41945e-07
FAM57A	-0.494134	8.13425e-17		AFG3L2	-0.211056	3.431e-07
SOWAHB	0.70523	1.02768e-16		LIFR	-0.607171	3.44789e-07
LCP1	-0.495407	1.03006e-16		IPO5	-0.293763	3.51225e-07
QTRT2	-0.421887	1.03006e-16		RAD54B	-0.656694	3.51225e-07
KIFC1	-0.568413	1.06659e-16		ST5	0.558426	3.55655e-07
CTDSP2	0.409734	1.11675e-16		SEPHS2	0.294554	3.58391e-07
GLYATL2	-0.983014	1.1378e-16		PMM2	-0.287361	3.66378e-07
PGM2	-0.405621	1.14813e-16		ZNF812P	-0.837608	3.68677e-07
RBL2	0.445682	1.1754e-16		NECTIN1	-0.39731	3.7574e-07
AMIGO2	1.97735	1.19555e-16		NUP214	-0.259129	3.82308e-07
NCLN	-0.524058	1.22684e-16		SHC4	1.24977	3.97659e-07
EPRS	0.495078	1.26961e-16		ING4	0.525204	4.02069e-07
CLCN3	0.509011	1.3401e-16		NUP155	-0.397283	4.02543e-07
NOL9	-0.449208	1.35875e-16		FANCC	-0.320777	4.02543e-07
SRSF7	-0.378834	1.51907e-16		TMEM219	0.432108	4.07039e-07
DUSP2	-1.04663	1.53189e-16		ZNF467	0.586414	4.09101e-07
EGF	0.938259	1.73949e-16		DMTN	0.516356	4.17265e-07
SNRNP40	-0.48567	1.80265e-16		UBR7	-0.327683	4.25942e-07
PNRC1	0.843192	1.94111e-16		ARRDC4	-0.544327	4.418e-07
DAPK2	1.07528	2.14433e-16		CADM2	-1.01542	4.43159e-07
PGAM5	-0.566496	2.18633e-16		SMC2	-0.494626	4.4345e-07
MMACHC	-0.592121	2.23534e-16		FBXO9	0.284125	4.55715e-07
SRSF1	-0.29125	2.27397e-16		RBMX	-0.264184	4.55715e-07
WDR3	-0.418664	2.45001e-16		CEP78	-0.359841	4.55715e-07
TOR1AIP1	0.443346	2.93608e-16		ERMAP	0.525076	4.65608e-07
ALDH18A1	-0.380286	2.99644e-16		CYTH1	-0.297538	4.79891e-07
SLC25A19	-0.825102	3.292e-16		KREMEN1	0.324656	4.91453e-07
GPX8	0.999543	3.3704e-16		TOP2A	-0.438852	4.97265e-07
SLC5A6	-0.478249	3.44186e-16		LINC00957	0.661691	4.97265e-07
GOLPH3L	0.658528	3.47195e-16		CDK1	-0.506501	5.00224e-07
RTN3	0.363453	3.63751e-16		MARS2	-0.331735	5.0528e-07
WDR76	-0.673236	3.84933e-16		BMPR1A	-0.337992	5.09096e-07
GSTCD	-0.522103	4.18668e-16		PRDM4	0.269481	5.20201e-07
DHFR	-0.422905	4.26934e-16		DNAJC4	0.582399	5.24522e-07
CRLF3	-0.706217	5.34081e-16		MCM2	-0.450251	5.35409e-07
KDM7A	0.766832	5.44223e-16		ZNF419	0.383499	5.35599e-07
VLDLR	0.719717	5.60604e-16		TUBB	-0.319613	5.49091e-07
CBWD1	-0.551177	5.84968e-16		CENPF	-0.43653	5.52765e-07
RAP1GAP2	-0.420891	6.38341e-16		HMMR	-0.635152	5.56384e-07
HNRNPDL	-0.380952	6.41994e-16		RETSAT	0.283062	5.62869e-07
ABTB2	0.752638	6.63181e-16		TUBGCP3	-0.255033	5.87243e-07
DNAH10	1.92464	6.78178e-16		PCNA	-0.336696	5.87243e-07
KIF23	-0.505511	6.80045e-16		SMOX	0.887664	6.03317e-07
ZNF850	-0.77711	6.99506e-16		SHROOM3	-0.229503	6.1517e-07
VDAC1	-0.320036	7.39079e-16		PAXIP1	-0.306421	6.18406e-07
SPRY1	-0.71076	8.24552e-16		ACSM3	-0.423267	6.27372e-07
PHF8	-0.566826	8.30236e-16		NEMP1	-0.382262	6.4948e-07
YARS	0.425917	8.6649e-16		SSBP2	0.477958	6.52116e-07
TUBA1B	-0.500063	8.81771e-16		MLH1	-0.284615	6.59699e-07
ZNF584	-0.516362	8.90558e-16		TNFRSF12A	0.776489	6.68418e-07
RHBDF2	-0.706669	9.07645e-16		FUBP1	-0.219062	6.69143e-07
DPH2	-0.634971	9.13573e-16		ZW10	-0.373874	6.77027e-07
DEPTOR	0.795053	9.27317e-16		TMEM45B	0.833837	6.77027e-07
MAP3K4	-0.416887	1.07181e-15		PRDX5	0.60346	6.85314e-07
DHX15	-0.44845	1.11822e-15		AC092171.3	0.7158	6.89965e-07
CCNB1	-0.459491	1.14049e-15		SH3PXD2A	1.00659	6.94246e-07
PRR11	-0.449973	1.26336e-15		B3GAT3	0.441489	6.94662e-07
WNT10B	-0.860412	1.2658e-15		IQCB1	-0.403004	7.12219e-07
HOXC13	0.729913	1.35304e-15		MIEF1	-0.224932	7.12518e-07
SFPQ	-0.297509	1.36338e-15		EIF2S1	-0.321001	7.12518e-07
DLAT	-0.481102	1.36338e-15		CSRP1	0.356517	7.14472e-07
WNT7B	-0.49776	1.36338e-15		SLAIN2	-0.303204	7.30359e-07
ZCCHC24	0.489045	1.37308e-15		STARD10	0.477066	7.55767e-07
NR2C2AP	-0.644607	1.40585e-15		SPOCK1	-1.54748	7.74739e-07
JPT2	-0.367127	1.40986e-15		MCM7	-0.32335	7.87303e-07
SI	0.765054	1.43412e-15		ZNF530	-0.419308	7.96163e-07
SLC25A29	0.611623	1.5268e-15		NKRF	-0.313534	8.14268e-07
C1QTNF6	1.01764	1.56977e-15		ANXA9	0.722226	8.28207e-07
PCTP	-0.692098	1.59879e-15		RBCK1	0.424846	8.31255e-07
FYN	1.5963	1.61505e-15		WNK1	-0.22553	8.40658e-07
ENC1	0.557066	1.65241e-15		GINS2	-0.395543	8.60717e-07
GLB1L2	-0.461667	1.7802e-15		ANAPC1	-0.353094	8.69541e-07
YRDC	-0.46367	1.78607e-15		NCOA2	0.236342	8.85139e-07
SORL1	0.554505	1.8813e-15		TRAK2	0.311205	8.98005e-07
MYC	-0.416575	2.00025e-15		KNTC1	-0.525104	8.98005e-07
ZNF629	0.801569	2.06721e-15		SFXN1	-0.289351	8.98311e-07
TUBGCP3	-0.377407	2.29244e-15		DDX21	-0.337238	8.98311e-07
BRCA1	-0.482586	2.30159e-15		PDE12	-0.272896	8.98311e-07
RETREG1	0.732238	2.54847e-15		KRT75	3.67146	9.35642e-07
PARP4	0.392696	2.6938e-15		SON	-0.17977	9.85498e-07
FAM117B	0.525997	3.14389e-15		SPATS2	0.260163	9.96509e-07
KIF24	-0.60873	3.14592e-15		AMIGO2	1.29278	9.96509e-07
ULBP1	1.1657	3.30352e-15		MMACHC	-0.377394	9.98063e-07
INSIG1	0.533427	3.32205e-15		ZIC2	0.345327	9.98174e-07
FOXM1	-0.41232	3.71747e-15		DBF4	-0.649783	1.01893e-06
DSN1	-0.507503	3.74494e-15		VDAC1	-0.207186	1.02056e-06
TUB	-0.52383	3.91678e-15		SIRT2	0.360299	1.02934e-06
KCNG1	1.03761	4.52138e-15		SYNJ1	-0.526875	1.03578e-06
ERBB2	0.542613	4.66936e-15		CENPU	-0.466111	1.04014e-06
ZNF142	-0.449116	4.71522e-15		CSE1L	-0.578442	1.04951e-06
HMGXB3	-0.456889	4.794e-15		UBE2C	-0.415008	1.04958e-06
PARP2	-0.469198	4.85725e-15		ISG20	0.627693	1.06406e-06
NRARP	-0.535109	4.85725e-15		ZNF358	0.725357	1.06555e-06
XRCC5	-0.381465	4.92789e-15		AC096677.1	1.01962	1.08604e-06
CCNE1	-0.607215	4.95364e-15		UCK2	-0.25591	1.09485e-06
DSG1-AS1	-1.25335	4.984e-15		GART	-0.257669	1.11464e-06
IQCH-AS1	0.815518	5.2796e-15		TIMELESS	-0.288905	1.15361e-06
ASAP3	0.820238	5.41413e-15		SLC22A23	0.309084	1.16423e-06
KLF5	-1.07391	6.28784e-15		DNAH5	-0.460346	1.17697e-06
DIO3	3.08991	6.39016e-15		PCF11	-0.274576	1.18032e-06
AL353622.1	0.99067	6.54617e-15		RIOK1	-0.444817	1.23382e-06
HSP90AA1	-0.493499	6.70016e-15		NUP35	-0.401954	1.24897e-06
DNAJC1	-0.372953	6.72442e-15		BRIX1	-0.49336	1.25832e-06
PLD3	0.55422	6.74511e-15		EPN2	-0.246149	1.31303e-06
RAP2B	0.442629	6.89254e-15		AGO4	0.307946	1.32569e-06
GALNT10	0.496684	6.95527e-15		DNAH10	1.28298	1.33753e-06
KLF16	-0.629146	7.10522e-15		NUP85	-0.266864	1.34015e-06
VASN	0.702455	7.30987e-15		S100P	1.01702	1.35553e-06
NUP62	-0.460312	7.7185e-15		MCTP1	0.996858	1.35895e-06
GAB1	0.81323	7.76192e-15		DLGAP5	-0.578938	1.39275e-06
ARL6IP5	0.481647	8.70139e-15		STMN1	-0.281945	1.40293e-06
PLD1	2.11338	8.80459e-15		HNRNPAB	-0.353943	1.43158e-06
TAF4B	-0.633331	8.81511e-15		RFC1	-0.290477	1.48105e-06
PNMA1	-0.626071	8.87755e-15		GNL2	-0.27886	1.48824e-06
AKTIP	0.502212	9.20304e-15		DYRK1B	0.44359	1.49215e-06
OTULIN	-0.574988	9.46019e-15		ESPL1	-0.28737	1.50864e-06
RBM28	-0.464221	1.02964e-14		ABCA1	1.01402	1.50864e-06
HBP1	0.760296	1.05095e-14		MRPS25	-0.247216	1.51063e-06
FAM102A	0.518354	1.1132e-14		EFNB3	1.15883	1.56991e-06
USP10	-0.305343	1.1351e-14		SEC24D	0.377877	1.58277e-06
NBEA	0.92292	1.14074e-14		UTP15	-0.437946	1.62671e-06
SCARB1	-0.416359	1.16043e-14		SERINC5	-0.238008	1.64803e-06
SLC33A1	0.433335	1.22507e-14		MXRA8	0.593395	1.65057e-06
ST6GALNAC4	0.815705	1.22999e-14		CLDN7	0.336795	1.66004e-06
DUSP7	-0.559179	1.24766e-14		NBR1	0.21811	1.66004e-06
UBIAD1	-0.461035	1.39686e-14		UTP6	-0.26544	1.6992e-06
HEBP2	-0.521144	1.48477e-14		RAD21	-0.34037	1.70943e-06
NOP58	-0.458882	1.53143e-14		POLQ	-0.427952	1.7184e-06
CYFIP2	0.42198	1.61662e-14		TAF4	-0.360166	1.7184e-06
TEAD4	-0.669546	1.62558e-14		LINC00649	0.620669	1.73966e-06
RPA1	-0.285486	1.65785e-14		RALGPS1	0.39855	1.7453e-06
AC093001.1	-1.40197	1.74272e-14		SPDL1	-0.46468	1.80123e-06
GTF3A	-0.460364	1.79511e-14		SLC20A2	0.29186	1.83518e-06
TFDP1	-0.364877	2.03895e-14		BCL11B	1.24729	1.8371e-06
CASC4	0.422996	2.05725e-14		ENO2	0.715229	1.97402e-06
LRIG1	-0.366664	2.10863e-14		RHOB	0.280809	1.99107e-06
CCDC58	-0.527985	2.15044e-14		PNP	-0.325076	1.99478e-06
YBX3	-0.3643	2.16348e-14		TJP1	-0.180747	2.00023e-06
FN3KRP	-0.574609	2.22136e-14		DOP1B	0.254478	2.00396e-06
TMEM79	-0.631211	2.32039e-14		UBAP2L	-0.237854	2.0078e-06
KDM6A	0.399943	2.33245e-14		SPDEF	-0.373657	2.04138e-06
MCC	0.899744	2.34009e-14		ARHGAP19	-0.332105	2.10293e-06
NIPAL2	0.816824	2.43842e-14		GBP2	1.31186	2.10576e-06
IMP4	-0.528403	2.5556e-14		INPP5J	0.509883	2.10576e-06
HUS1	-0.393371	2.64754e-14		RPP30	-0.403734	2.17071e-06
SPATA13	-0.588957	2.6511e-14		PTPN6	0.416595	2.19462e-06
TMEM59	0.51853	2.77038e-14		RBM28	-0.303986	2.24967e-06
PCMTD1	0.806356	2.84681e-14		BZW2	-0.296908	2.30617e-06
TONSL	-1.13288	2.92436e-14		FAM174A	0.477012	2.34526e-06
KREMEN1	0.453982	2.96504e-14		SESN3	0.635966	2.36101e-06
ZNF551	-0.468937	3.00986e-14		NIP7	-0.320665	2.39244e-06
ALPK1	0.916115	3.07469e-14		KIF24	-0.3905	2.39244e-06
LINC01516	-1.2566	3.26387e-14		PARP2	-0.303227	2.42404e-06
BNIP3L	0.640113	3.32412e-14		POLD3	-0.367472	2.4324e-06
CCNA2	-0.620856	3.34497e-14		DCAF1	-0.277871	2.51088e-06
C1orf174	-0.524648	3.41371e-14		SFXN2	-0.246088	2.51417e-06
NQO1	0.745071	3.64375e-14		RAP2B	0.289991	2.58181e-06
KIF15	-0.627317	3.75846e-14		PIP5K1A	-0.182728	2.58748e-06
POLQ	-0.634303	4.18457e-14		MAGOHB	-0.400303	2.59659e-06
CCT5	-0.339819	4.1946e-14		MAPT	0.495641	2.59659e-06
ACTR3	-0.380546	4.21488e-14		PARD3B	0.415895	2.65091e-06
INPP5J	0.746777	4.21488e-14		PARP4	0.253165	2.65864e-06
RGL1	0.697438	4.24369e-14		SOWAHB	0.437768	2.65864e-06
MCMBP	-0.501793	4.27152e-14		CTSD	0.427031	2.66379e-06
RBM17	-0.366393	4.4179e-14		EIF4EBP1	0.526153	2.66379e-06
TRMU	-0.407974	4.6402e-14		HNRNPDL	-0.237455	2.74824e-06
B4GALT1	0.316371	4.69511e-14		NPTXR	0.385236	2.90521e-06
ZFAND3	0.358184	4.74135e-14		FTL	0.511805	2.96067e-06
ELF3	0.708731	4.74135e-14		ZKSCAN1	0.2383	2.9792e-06
GTPBP3	-0.614144	5.10914e-14		HS3ST1	0.503171	2.9974e-06
SOX4	0.369129	5.12894e-14		ALDH3B2	0.427319	3.00411e-06
POLD3	-0.547976	5.305e-14		GNAZ	0.373466	3.00715e-06
GFM1	-0.380304	5.305e-14		WDR62	-0.321475	3.13661e-06
SLCO4A1	-0.459449	5.50945e-14		USP11	0.371046	3.16865e-06
UMPS	-0.465985	6.83538e-14		POLR3E	-0.3279	3.20913e-06
ADH1C	-2.37619	7.17053e-14		KIF2C	-0.303156	3.29466e-06
JDP2	0.702662	7.73932e-14		TRIP12	-0.220173	3.3152e-06
CKAP5	-0.328468	7.77329e-14		HSP90AA1	-0.315251	3.34821e-06
EIF1	0.298594	7.78199e-14		MME	0.308721	3.36514e-06
STIP1	-0.459662	7.83167e-14		SH3RF1	-0.248074	3.3947e-06
ANAPC16	0.493711	7.93915e-14		GRPEL1	-0.290322	3.4008e-06
ATP10A	-0.557298	8.03109e-14		FBXO45	-0.39783	3.46357e-06
ASS1	0.55073	8.08411e-14		KLHL24	0.457466	3.46528e-06
TRIM36	-0.689656	8.11004e-14		ARSD	0.328459	3.47459e-06
S1PR3	-0.84945	8.36475e-14		POLA2	-0.273665	3.52933e-06
RAD51	-0.668619	8.72968e-14		AL691432.2	0.498869	3.62117e-06
LRRFIP2	-0.309226	9.13817e-14		BRI3	0.346748	3.66579e-06
NVL	-0.311118	9.50843e-14		DNMT1	-0.376358	3.79089e-06
CBLB	0.651218	1.0005e-13		NSD2	-0.235278	3.79129e-06
KIAA1191	0.375072	1.17377e-13		HEG1	0.577787	3.80812e-06
CAMK1D	1.89245	1.3273e-13		OR5B2	-1.63121	3.86572e-06
NUP35	-0.574492	1.34445e-13		KDM4A	0.353666	3.87356e-06
MANEA	0.879585	1.40474e-13		SLC22A3	0.205447	3.8979e-06
DOP1B	0.365654	1.43116e-13		FBXL16	0.433615	3.90725e-06
NCOA3	0.501274	1.53258e-13		NDC1	-0.521367	3.92488e-06
CHEK2	-0.517272	1.55998e-13		DOT1L	-0.394446	3.93469e-06
ACAA1	-0.492032	1.56854e-13		DNAAF5	-0.282775	3.98002e-06
UBAP2L	-0.346572	1.58009e-13		HLA-B	0.719741	4.07771e-06
SH3KBP1	0.630887	1.62097e-13		LIMD2	1.1047	4.14799e-06
TSPAN3	0.457545	1.68326e-13		ANKRD17	-0.230584	4.15456e-06
PSMD11	-0.344661	1.7015e-13		FARSB	-0.3608	4.17176e-06
LDLRAD3	-0.495376	1.75e-13		IP6K2	0.234256	4.18289e-06
ILF3	-0.48005	1.78366e-13		HNRNPK	-0.207196	4.18753e-06
ZNF814	-0.522198	1.79055e-13		FAM118B	-0.326682	4.18753e-06
FLRT1	2.76916	1.81063e-13		RAB27A	-0.423207	4.20292e-06
KIAA0319L	0.365549	1.81468e-13		MST1	0.81377	4.25613e-06
SLC9A3R2	-0.758595	1.8308e-13		UBE3C	-0.194153	4.26477e-06
AHSA1	-0.50439	2.08529e-13		GFPT1	0.256124	4.27702e-06
DDIAS	-0.967983	2.08529e-13		OTUD6B	-0.431949	4.30236e-06
NAGA	-0.36388	2.13524e-13		ARHGAP44	0.336176	4.34915e-06
RPL7L1	-0.301719	2.18334e-13		NRP1	-0.234209	4.35018e-06
VEGFA	0.547238	2.23565e-13		CENPW	-0.436036	4.35018e-06
ABCA12	0.971709	2.45329e-13		DEPTOR	0.50372	4.46483e-06
CSGALNACT1	-1.31958	2.51747e-13		SLC2A3	-2.13311	4.54141e-06
HIST1H2BK	-0.560994	2.59438e-13		CYCS	-0.389357	4.54141e-06
NSD2	-0.348217	2.59674e-13		GALK1	0.579554	4.54777e-06
DDX31	-0.449434	2.59767e-13		CHPF	0.50271	4.57571e-06
STARD4	1.0118	2.83284e-13		CIT	-0.397373	4.59331e-06
ADD3	0.439323	2.93327e-13		CHD8	-0.199816	4.62141e-06
FEM1A	-0.41375	3.01897e-13		NARS	0.228274	4.63544e-06
TP53INP2	0.524687	3.30092e-13		SLC7A1	0.229093	4.66687e-06
HLCS	0.350706	3.32973e-13		2005-09-01	0.437609	4.7107e-06
ARHGAP29	0.894568	3.33876e-13		IGF1	-0.669036	4.72493e-06
MASTL	-0.495954	3.34902e-13		NDC80	-0.491895	4.72493e-06
RDH10	0.577613	3.42959e-13		UTP4	-0.286852	4.72493e-06
CSKMT	-0.536405	3.45917e-13		UGT2B15	0.496071	4.72493e-06
ZMYND19	-0.595857	3.57385e-13		MAGED1	0.241362	4.73994e-06
S100P	1.40182	3.64229e-13		SEC11C	0.327338	4.80454e-06
RRP7A	-0.682975	3.66023e-13		SEMA6D	-1.39335	4.84672e-06
PHF21A	0.476319	3.76043e-13		XRCC3	-0.383621	4.94815e-06
DDX11	-0.640805	4.00179e-13		ZP3	0.439846	4.99589e-06
CDC42SE1	-0.291394	4.0747e-13		NIPSNAP1	0.313745	5.07305e-06
GNS	0.318212	4.20355e-13		ALAS1	0.246459	5.09772e-06
OR5B2	-2.92877	4.22369e-13		SSRP1	-0.267341	5.17189e-06
CCDC69	0.88493	4.26401e-13		SF1	-0.212904	5.3261e-06
DNAJC2	-0.476205	4.28031e-13		SNX21	0.59298	5.42511e-06
MIEF1	-0.308956	4.36615e-13		CCDC69	0.615363	5.4439e-06
ALYREF	-0.512902	4.39445e-13		GSPT1	-0.245435	5.47602e-06
PRDX6	-0.354622	4.48803e-13		SLC4A3	0.922225	5.49533e-06
CDR2	-0.574294	4.49915e-13		MAPKAPK3	0.293754	5.5603e-06
BEND4	-0.700324	4.53513e-13		NASP	-0.394099	5.56263e-06
CENPP	-0.546884	4.69693e-13		HJURP	-0.267572	5.71185e-06
CTIF	0.74253	4.73289e-13		NNMT	-0.766723	6.11764e-06
UBE2T	-0.560726	4.75598e-13		SLC35F6	0.238222	6.12366e-06
C9orf106	1.06158	4.77423e-13		CTTNBP2NL	0.258192	6.17197e-06
MAK16	-0.446373	4.86659e-13		MID1IP1	0.277526	6.19846e-06
ARHGAP44	0.484532	5.17607e-13		PRKDC	-0.304077	6.23383e-06
STAU2	0.490002	5.33954e-13		VLDLR	0.441957	6.4335e-06
TOX3	0.987695	5.45192e-13		POM121	-0.292712	6.52747e-06
ATAD3B	-0.720032	5.70048e-13		RGMB	0.237458	6.65352e-06
SLC37A1	0.476514	5.71449e-13		CACYBP	-0.317915	6.65772e-06
EIF4E3	0.759632	5.77201e-13		TTLL1	0.507056	6.70438e-06
BCCIP	-0.446188	5.79893e-13		TBC1D1	-0.217427	6.71395e-06
TMEM267	0.977263	5.94788e-13		NAP1L4	-0.162559	6.72185e-06
FSIP1	1.34753	6.04838e-13		TTC39B	0.50012	6.78734e-06
MYO1E	-0.41623	6.08005e-13		TTI1	-0.270079	6.79719e-06
LTF	2.05407	6.34602e-13		SYTL1	0.439857	6.8607e-06
SLC39A10	-0.770449	6.50633e-13		TXNRD1	0.234065	6.86678e-06
POLD1	-0.746385	6.50765e-13		ZFYVE27	0.359365	6.93974e-06
TMEM154	1.20555	6.51873e-13		TACC2	0.502142	6.95514e-06
MAN1A1	1.35551	6.55445e-13		LARS2	-0.210915	7.232e-06
PLA2G6	0.498421	6.72186e-13		MCM3	-0.256884	7.23919e-06
CXXC5	0.53949	7.65331e-13		XRCC2	-0.473234	7.23919e-06
SAMD12	0.672484	8.19493e-13		EGF	0.576309	7.26884e-06
RMI2	-0.724861	9.20174e-13		CD63	0.478692	7.27438e-06
NA	1.64217	9.29907e-13		PDHX	-0.203124	7.28145e-06
DDX21	-0.463294	9.3464e-13		FAM122B	-0.423578	7.38114e-06
ISG20	0.850732	9.4621e-13		DNTTIP2	-0.335816	7.39256e-06
TPD52	-0.507773	9.59739e-13		CAMKK2	-0.233009	7.39256e-06
NIP7	-0.453757	1.01977e-12		STAG1	-0.347028	7.39256e-06
HIBADH	0.368259	1.03702e-12		ASF1B	-0.330155	7.80172e-06
LCMT2	-0.403287	1.09004e-12		EIF1	0.191978	7.89837e-06
SPATA6	0.863702	1.11758e-12		G3BP2	-0.38455	7.92725e-06
CYB5D1	-0.417152	1.17179e-12		TP53I13	0.604066	7.92725e-06
MRM2	-0.474362	1.19741e-12		ZFP36L2	-0.3614	7.92878e-06
CREBRF	0.831222	1.25762e-12		MAPK11	0.697328	7.92878e-06
POLR3A	-0.251609	1.27152e-12		EIF4G2	-0.185721	8.19597e-06
MARF1	0.372207	1.32486e-12		UBE2H	0.179193	8.26272e-06
ANKRD13A	0.354851	1.34531e-12		THRB	-0.286819	8.29602e-06
SCML2	-0.490225	1.37155e-12		SMAD3	0.451023	8.32999e-06
SCD5	0.691139	1.45609e-12		MFSD14B	-0.295505	8.34486e-06
YPEL5	0.730624	1.46009e-12		RBL2	0.260622	8.58552e-06
EGFR	-0.315369	1.49975e-12		SLC25A13	-0.313802	8.61286e-06
POLR1E	-0.390109	1.61105e-12		MAGOH	-0.361492	8.63354e-06
RIMS1	0.455042	1.64085e-12		MCCC1	0.202547	8.6654e-06
DHODH	-0.515614	1.68485e-12		MRPL50	-0.341192	8.93346e-06
DDX39A	-0.583038	1.70465e-12		TRIM16	0.30887	8.93818e-06
KRT8P31	-2.3559	1.72851e-12		SPATA6	0.594075	9.11598e-06
UTP25	-0.388818	1.73808e-12		GRAMD1A	0.340784	9.19684e-06
DGCR8	-0.535345	1.77858e-12		MFSD10	0.463316	9.24277e-06
HSD17B7	0.585405	1.78161e-12		TOPBP1	-0.331439	9.26331e-06
SREBF2	0.384879	1.78965e-12		ATP2B1	0.400131	9.33013e-06
ELAVL1	-0.26724	1.83697e-12		YWHAH	-0.24439	9.36796e-06
AC018865.1	-2.38519	1.88933e-12		APBB1	0.48017	9.41812e-06
OPTN	1.09141	1.93588e-12		EFTUD2	-0.235359	9.42771e-06
ATF6	0.332719	2.02858e-12		QRSL1	-0.324662	9.47232e-06
PIK3AP1	-0.765254	2.02858e-12		AGR2	-0.592451	9.56778e-06
RYR2	0.567149	2.03951e-12		IGSF3	0.484079	9.61507e-06
NPTN	0.352397	2.07504e-12		USP10	-0.189318	9.65693e-06
ABCF2	-0.401853	2.08027e-12		TROAP	-0.441609	9.79309e-06
SERINC5	-0.327229	2.08717e-12		GPR137B	0.431407	9.82597e-06
PLEKHB1	0.4633	2.26725e-12		RAB8A	-0.249851	9.82597e-06
RABL3	0.565097	2.36597e-12		LHFPL2	0.556917	9.86339e-06
MSH2	-0.707465	2.43962e-12		MTR	-0.32592	1.00324e-05
ZNF467	0.760381	2.48514e-12		NAF1	-0.395507	1.00324e-05
VOPP1	0.471977	2.49159e-12		PPID	-0.251076	1.00856e-05
PPM1M	1.10007	2.49159e-12		AL139393.2	-0.705372	1.01271e-05
LMO4	0.465638	2.59847e-12		NA	-0.23304	1.02212e-05
AGA	0.643801	2.67915e-12		HTRA1	0.886543	1.02624e-05
HEG1	0.797369	2.72776e-12		TUBG1	-0.330588	1.02889e-05
SEC24D	0.513562	2.75694e-12		SLC25A15	-0.300793	1.04163e-05
BICD2	-1.1202	2.77643e-12		VAT1	0.325305	1.04163e-05
RPUSD1	-0.603421	2.80456e-12		HMGB1	-0.278268	1.04163e-05
MALT1	-0.64218	2.97571e-12		CDC7	-0.422439	1.04482e-05
PFAS	-0.818595	3.0196e-12		SDSL	0.592424	1.04952e-05
POM121	-0.421305	3.0203e-12		MIS18A	-0.365685	1.05066e-05
MTA2	-0.3313	3.10731e-12		MSH2	-0.476974	1.05104e-05
ATP9A	0.334891	3.11507e-12		ATP8B2	0.307006	1.05104e-05
METTL8	-0.514554	3.11698e-12		JUN	0.46673	1.06418e-05
NDUFA4L2	1.44183	3.25041e-12		NADSYN1	0.301872	1.06944e-05
DYRK1B	0.598674	3.29228e-12		ZNF454	0.532838	1.07286e-05
SLC44A4	0.50413	3.31606e-12		NMT1	-0.227299	1.08583e-05
NEDD9	0.715796	3.33354e-12		CERK	1.39855	1.09515e-05
USP11	0.515399	3.34844e-12		PRR16	-1.45814	1.09515e-05
CHSY1	-0.368801	3.57974e-12		ESRP2	-0.281379	1.10046e-05
WBP11	-0.351528	3.81677e-12		TANC1	0.176351	1.10761e-05
UBR7	-0.42476	3.90856e-12		SORBS3	0.432068	1.11546e-05
LRRC8D	0.649719	3.93061e-12		SSR2	0.347564	1.1308e-05
SNAI2	-1.99874	3.94603e-12		2001-03-01	-0.184115	1.14644e-05
AGPAT2	0.810285	3.9715e-12		MXI1	0.347772	1.14965e-05
MICU1	0.369798	4.10064e-12		DSN1	-0.306607	1.14965e-05
MR1	0.851578	4.12567e-12		SUPV3L1	-0.244981	1.15487e-05
NUSAP1	-0.471359	4.18524e-12		TTC9	0.64668	1.18073e-05
SGMS1-AS1	0.894362	4.18524e-12		NTNG1	-0.79504	1.18727e-05
AL162582.1	0.634279	4.32743e-12		PRIM2	-0.462075	1.19907e-05
SLC44A1	0.589273	4.32937e-12		LSM6	-0.438158	1.19907e-05
UGDH-AS1	0.869753	4.33011e-12		NUDT14	0.497464	1.19907e-05
PLPP2	0.795786	4.37751e-12		STOX1	0.690762	1.21009e-05
IARS	0.305255	4.37751e-12		HSD17B14	1.68435	1.21364e-05
NRP1	-0.330353	4.43943e-12		SCAMP5	0.583983	1.22083e-05
TSPYL2	0.801474	4.65127e-12		SRFBP1	-0.453955	1.22934e-05
ISL2	1.23153	4.67887e-12		PDXDC1	-0.172695	1.22934e-05
NPC1	-0.338189	4.93374e-12		AC020978.5	-0.358466	1.22934e-05
IP6K2	0.327596	4.94628e-12		SLC25A29	0.366077	1.23087e-05
MICAL1	-0.775014	4.9957e-12		CBX4	0.365733	1.244e-05
RANBP1	-0.572886	5.00148e-12		ELAVL1	-0.17839	1.25331e-05
ANXA9	0.937003	5.0063e-12		PHF21A	0.311425	1.30096e-05
H2AFX	-0.604423	5.19561e-12		CTSF	0.555105	1.30096e-05
TTI1	-0.384497	5.21046e-12		EMC3-AS1	-0.369682	1.30846e-05
CERS4	0.624166	5.22378e-12		PNO1	-0.356429	1.31632e-05
PIP5K1A	-0.250465	5.29658e-12		ZDHHC5	-0.158301	1.31868e-05
STXBP5L	0.554933	5.39234e-12		OIP5	-0.457018	1.33606e-05
EPAS1	0.790007	5.67279e-12		MAN2B2	0.249924	1.35339e-05
JMJD6	-0.536458	5.70966e-12		RIMS4	0.748927	1.35374e-05
SESN1	0.596458	5.72007e-12		SOCS2	-0.653888	1.37887e-05
RPA2	-0.533725	5.7817e-12		KIFC1	-0.322684	1.39153e-05
TACC2	0.718519	6.16264e-12		ISL2	0.850778	1.40124e-05
MEX3C	0.430757	6.21465e-12		ECT2	-0.484382	1.41699e-05
ZNF473	-0.481141	6.40076e-12		PELI2	0.538553	1.4295e-05
TUBB4B	-0.52071	6.4159e-12		SNHG17	-0.251116	1.4295e-05
GTF3C2	-0.366429	6.44495e-12		TAF5L	-0.287917	1.43034e-05
NOP14	-0.764778	6.50835e-12		FERMT1	-0.309275	1.49048e-05
LPIN1	0.396536	6.8613e-12		DNAJC11	-0.304843	1.51364e-05
RRP15	-0.429673	7.13128e-12		POGK	-0.211461	1.51388e-05
IPO5	-0.375524	7.15543e-12		LINC00963	0.28452	1.53262e-05
NCAPG2	-0.370655	7.71903e-12		SRRD	-0.241794	1.54024e-05
THNSL2	0.410201	7.86457e-12		MMP24OS	0.41563	1.54024e-05
CHCHD4	-0.539809	7.99902e-12		EEF2K	-0.23364	1.5666e-05
ZIC2	0.448684	8.26191e-12		MTPAP	-0.285279	1.5666e-05
ALPK2	-2.5458	8.30026e-12		LRRC75A-AS1	0.326251	1.58315e-05
FHDC1	-0.423794	8.30622e-12		LBR	-0.36644	1.59114e-05
GPRC5C	0.881295	8.68318e-12		WDR76	-0.385306	1.63983e-05
AC069228.1	1.52766	8.736e-12		TRIM68	0.28698	1.65738e-05
ZDHHC5	-0.230196	9.08492e-12		INO80	-0.220042	1.66504e-05
SBF2	0.352851	9.23803e-12		ZNF697	-0.57091	1.69525e-05
SLC20A2	0.386891	9.56675e-12		QSOX2	-0.241112	1.70464e-05
PPM1G	-0.659009	9.70987e-12		ATP6AP1	0.280087	1.72608e-05
C15orf39	-0.580695	1.03939e-11		RTN3	0.208566	1.73886e-05
WDFY3	0.426335	1.05034e-11		TPP1	0.257031	1.73886e-05
PDHX	-0.286075	1.05968e-11		CRYL1	0.34754	1.77167e-05
RHOB	0.375914	1.06653e-11		TGFBR3	0.2901	1.78034e-05
ABCC5	0.484276	1.06862e-11		MCMBP	-0.307791	1.7807e-05
BCHE	0.596631	1.07508e-11		NUP153	-0.310797	1.79158e-05
C11orf49	0.516122	1.07856e-11		ERP29	0.336022	1.79456e-05
ARHGAP12	0.557555	1.08038e-11		TMSB4X	1.01793	1.82691e-05
TNPO3	-0.268998	1.13443e-11		KIF11	-0.4267	1.84813e-05
MORN4	0.485163	1.13999e-11		ENTPD3	1.14911	1.87306e-05
LINC00648	0.946612	1.20029e-11		FKBP9	0.282603	1.91775e-05
SCLY	-0.89776	1.20334e-11		DRAIC	0.430008	1.95189e-05
BLMH	-0.37062	1.24928e-11		ZNF142	-0.26549	1.96284e-05
HSPA8	-0.394205	1.28024e-11		TAF4B	-0.377424	1.96284e-05
SLC7A1	0.317852	1.28683e-11		KCND3	0.589808	1.96785e-05
C11orf24	-0.549583	1.34033e-11		ID3	0.546714	1.97055e-05
STX3	0.341761	1.37836e-11		MRE11	-0.404585	1.98182e-05
PAPSS1	0.290414	1.38271e-11		IQCN	0.535249	1.98309e-05
ING4	0.654776	1.42065e-11		RTN4IP1	-0.427547	1.9846e-05
SEPHS2	0.370018	1.44279e-11		SQLE	-0.292869	1.9937e-05
SGMS1	0.438706	1.4871e-11		FBLIM1	0.788916	2.00154e-05
LSM6	-0.629113	1.49621e-11		FADS3	0.483245	2.01128e-05
CNTN2	2.63169	1.49634e-11		HID1	0.346808	2.0212e-05
ATP2B1-AS1	1.37157	1.51054e-11		ZMYND12	0.731666	2.04327e-05
PLCB4	0.457996	1.56354e-11		RALB	0.331696	2.04458e-05
EIF3B	-0.536449	1.56354e-11		WDR5	-0.236708	2.06329e-05
TAF5L	-0.415386	1.57606e-11		AK4	-0.291421	2.09325e-05
TCP1	-0.299869	1.57745e-11		PRSS23	1.1341	2.14296e-05
GCN1	-0.538416	1.62056e-11		NIPAL2	0.502602	2.20199e-05
ZC3H6	0.729839	1.63848e-11		PTDSS1	-0.228389	2.20297e-05
NDUFV3	-0.356314	1.68354e-11		DBI	-0.367229	2.24522e-05
JUND	0.595975	1.77976e-11		USP13	-0.220565	2.30039e-05
NPTXR	0.51697	1.80334e-11		CTSH	0.368734	2.30039e-05
DHRS3	0.981058	1.87098e-11		SGO1	-0.48471	2.30044e-05
KLHL18	-0.39638	1.92405e-11		SCD5	0.455697	2.34257e-05
RIMKLA	0.437446	1.9978e-11		METRNL	0.794784	2.37391e-05
SRM	-0.504725	2.06962e-11		KIF21A	-0.291931	2.38428e-05
MBD5	0.598175	2.08963e-11		NA	-0.252171	2.39521e-05
YAP1	0.503835	2.1038e-11		FLRT1	1.78989	2.43382e-05
EPHA3	0.31345	2.11209e-11		GMPS	-0.347576	2.44446e-05
RNF168	-0.688983	2.17745e-11		SLC29A1	-0.381648	2.45935e-05
GOT2	-0.325653	2.22593e-11		ORC5	-0.536156	2.49e-05
ABHD4	0.512951	2.3034e-11		SIX4	-0.355092	2.49583e-05
PEX13	0.493155	2.32003e-11		LINC00662	0.376889	2.49583e-05
PPID	-0.352797	2.44448e-11		DDX39A	-0.374862	2.49935e-05
HSP90AB1	-0.36472	2.45629e-11		AC006252.1	0.947117	2.54669e-05
ANKRD27	-0.313294	2.56365e-11		ANAPC16	0.303997	2.65498e-05
CHORDC1	-0.463116	2.59381e-11		PSMD1	-0.209265	2.66245e-05
MAFB	-0.285077	2.85621e-11		RAMP1	0.536371	2.6758e-05
ETFDH	0.34584	2.91324e-11		SCARB1	-0.245683	2.69611e-05
FAT1	-0.366657	2.93905e-11		RAD51AP1	-0.43036	2.6973e-05
STEAP2	0.575521	3.05635e-11		PLD1	1.29675	2.73333e-05
SHC4	1.5207	3.09008e-11		AMER1	-0.278737	2.73333e-05
FBXO32	0.97775	3.11438e-11		PPM1A	-0.298222	2.74439e-05
BSDC1	0.381685	3.20922e-11		KRT80	0.968793	2.80002e-05
ENTPD3	1.61625	3.21984e-11		USP31	-0.248121	2.82968e-05
IL6ST	0.638343	3.24813e-11		KDM1A	-0.187034	2.83384e-05
DNAJA1	-0.358168	3.34552e-11		TOX3	0.640431	2.89252e-05
KDM6B	0.517713	3.42901e-11		PPARA	0.34941	2.89703e-05
UGT2B28	-1.86958	3.73159e-11		ANAPC7	-0.20553	2.89703e-05
INO80	-0.313335	3.79045e-11		LINC01297	-0.581755	2.93878e-05
ENPP5	0.852284	3.83199e-11		CCDC86	-0.333329	2.94636e-05
CADM2	-1.26131	3.96351e-11		CYP4V2	0.361264	2.97462e-05
MYB	-0.669048	4.07911e-11		LINC02482	0.785462	2.98456e-05
ZC3HAV1	-0.337474	4.1005e-11		PGD	0.290371	2.99714e-05
PRR16	-2.21613	4.12799e-11		DDAH2	0.608091	3.01133e-05
DHRS2	-0.615572	4.13367e-11		RRP7BP	-0.456567	3.06578e-05
PKNOX2	0.571919	4.43803e-11		CHPF2	0.318423	3.14574e-05
ZNF674	0.792909	4.59164e-11		TOB1	0.193278	3.16647e-05
DDX55	-0.321155	4.59341e-11		TRAPPC6A	0.49467	3.19634e-05
SRGAP3	0.58323	4.60842e-11		SIGIRR	0.477776	3.19634e-05
TRMT61A	-0.619447	4.69317e-11		MAPK8IP1	0.395017	3.26015e-05
FKBP4	-0.411833	4.98257e-11		SEC22C	-0.213599	3.3027e-05
MAP3K14-AS1	0.858569	5.0011e-11		RAD51C	-0.331459	3.32557e-05
KIAA0100	-0.296926	5.03479e-11		ULBP1	0.68198	3.35711e-05
SRRD	-0.340391	5.05551e-11		STAT2	0.25013	3.35711e-05
SLC10A7	-0.554277	5.15489e-11		NCBP1	-0.344181	3.37722e-05
GEMIN6	-0.570488	5.21862e-11		ZSCAN18	0.393369	3.38666e-05
HLF	-0.548369	5.38984e-11		UBE2T	-0.347533	3.42568e-05
CSRNP2	0.389296	5.40756e-11		NOLC1	-0.274195	3.43556e-05
HRK	1.73285	5.46737e-11		ELF1	0.266245	3.57677e-05
COA7	-0.432105	5.55148e-11		LCMT2	-0.254101	3.62733e-05
AC020571.1	-1.35161	6.02968e-11		DLEU1	-0.383395	3.62733e-05
FGFRL1	-0.404817	6.03188e-11		SLC9A7	0.239348	3.68143e-05
NMNAT2	0.556427	6.04505e-11		CCNK	-0.212182	3.68226e-05
EIF2S1	-0.402629	6.05402e-11		ENC1	0.319485	3.71275e-05
ZFP36L1	0.352479	6.25309e-11		METTL8	-0.329481	3.71508e-05
NA	0.47292	6.41622e-11		ACBD4	0.538908	3.7589e-05
TBC1D5	0.332302	6.53142e-11		ARHGAP1	-0.273791	3.77082e-05
WNK1	-0.283978	6.59199e-11		KNOP1	-0.211928	3.77573e-05
NUP214	-0.316371	6.62656e-11		MASTL	-0.30564	3.78219e-05
PKIG	0.784987	6.99265e-11		IVNS1ABP	-0.360144	3.81409e-05
APEX2	-0.537186	7.58352e-11		HSPA8	-0.258044	3.85582e-05
IDH3A	-0.330263	7.602e-11		MCC	0.547933	3.87813e-05
CRYL1	0.485103	7.65574e-11		ABHD8	0.445668	3.89487e-05
AKAP12	-2.64811	7.76957e-11		RNF19A	0.42454	3.907e-05
USP7	-0.352534	7.84067e-11		CCT8	-0.29553	3.907e-05
NFATC2IP	-0.29014	8.03871e-11		SLC35D2	0.454456	3.99836e-05
NKRF	-0.388381	8.03871e-11		NOCT	-0.406455	4.03607e-05
YPEL1	0.756057	8.08967e-11		PLK2	-0.273306	4.13937e-05
HK2	-0.733064	8.15295e-11		ZBTB10	-0.644043	4.1449e-05
RARB	-0.834509	8.23449e-11		LRRFIP2	-0.186732	4.15824e-05
PUS3	-0.446228	8.63219e-11		NA	1.04413	4.16256e-05
PER3	-0.307091	8.80376e-11		SUPT16H	-0.217954	4.22525e-05
BTN2A2	0.712186	9.17966e-11		ZBED4	-0.173867	4.22682e-05
RAB6A	0.513628	9.59598e-11		ZNF714	-0.346291	4.24366e-05
NA	-0.69005	9.62323e-11		GGT7	0.510543	4.25485e-05
CDKN1B	0.404536	9.75856e-11		LIAS	-0.32162	4.27285e-05
BLOC1S6	0.525397	9.7923e-11		DDI2	-0.250817	4.27285e-05
RFC1	-0.369602	9.83314e-11		MLST8	0.37775	4.30264e-05
OPRK1	1.74492	1.01512e-10		WDR13	0.390715	4.35149e-05
KBTBD6	-0.346497	1.0268e-10		SPAG17	-1.87778	4.51114e-05
KDM4A	0.465317	1.05539e-10		DCAKD	0.275565	4.51114e-05
MYO5C	-0.305617	1.06199e-10		HRK	1.20209	4.58744e-05
ZFP14	0.636961	1.07666e-10		OSGEPL1	-0.396135	4.73267e-05
SLC19A1	-0.419108	1.07996e-10		SNRPF	-0.292438	4.74404e-05
XRCC2	-0.639963	1.08032e-10		CEP152	-0.360385	4.74857e-05
PITPNB	-0.402608	1.08974e-10		PSMD11	-0.207	4.74857e-05
CPS1	0.532287	1.14303e-10		SPIRE1	0.268175	4.82749e-05
NUAK1	0.701196	1.16089e-10		CELF1	-0.158659	4.833e-05
SLC30A4	0.540781	1.19407e-10		SEMA6A	0.264827	4.86948e-05
WDTC1	0.437295	1.19796e-10		KIAA1191	0.225015	4.88193e-05
ZNF697	-0.799576	1.19796e-10		MYO1E	-0.257188	4.89866e-05
NACC1	-0.369318	1.19921e-10		ZBTB46	0.577907	4.92625e-05
AC012073.1	-0.762745	1.21018e-10		NOXA1	0.739408	4.92625e-05
DUSP5	0.912916	1.24384e-10		DUBR	-0.464811	5.01301e-05
SEC14L2	-0.63494	1.29129e-10		SAT2	0.415491	5.049e-05
MARK1	0.641616	1.3218e-10		HSD17B4	-0.208637	5.074e-05
CAST	0.332633	1.33212e-10		DSCC1	-0.534379	5.08261e-05
BVES	1.25402	1.34511e-10		CHCHD3	-0.278226	5.10926e-05
SF3A3	-0.335002	1.35361e-10		UBE2N	-0.353355	5.11607e-05
TCERG1	-0.396505	1.38898e-10		LTV1	-0.338694	5.11979e-05
AKAP8	-0.502379	1.52862e-10		PPIH	-0.368135	5.14452e-05
CCNB2	-0.358152	1.53937e-10		SNHG16	-0.192768	5.215e-05
MAP3K6	-0.601045	1.57266e-10		SLC39A11	0.313676	5.22548e-05
NFAT5	0.603186	1.57944e-10		NUDT8	0.488518	5.25661e-05
IGSF3	0.648634	1.57944e-10		AC093673.1	1.26227	5.30384e-05
ABR	0.455645	1.63876e-10		PDGFA	0.5498	5.31591e-05
IVNS1ABP	-0.520126	1.66765e-10		AC012073.1	-0.516182	5.31591e-05
LINC01687	0.608949	1.67508e-10		KPNA1	-0.258314	5.31977e-05
PDCD11	-0.714282	1.68364e-10		TMEM159	0.354969	5.36887e-05
GAREM1	0.443763	1.68826e-10		SLC22A17	0.416696	5.38954e-05
AC008124.1	0.469385	1.69439e-10		RTN4RL1	0.623256	5.56854e-05
FHOD1	-0.467755	1.80788e-10		GNB1	0.12689	5.6738e-05
FAM13A-AS1	-0.893754	1.80788e-10		PARP8	0.337247	5.6738e-05
STIL	-0.458054	1.80842e-10		PRAC1	0.553978	5.6738e-05
C6orf132	-0.415686	1.82971e-10		CCNE1	-0.340529	5.74348e-05
RETSAT	0.339754	1.8468e-10		HIBADH	0.228837	5.86725e-05
PAIP1	0.445161	1.85486e-10		GUCY1A1	-0.247991	5.89894e-05
GRIN3A	-0.687594	1.86328e-10		LMO4	0.29445	5.90705e-05
SLC6A20	3.03391	1.8669e-10		PRDM1	-1.97274	5.91711e-05
ERN1	0.415174	1.86993e-10		INTS13	-0.307013	5.94038e-05
CYP11A1	-1.82094	1.90757e-10		RBM17	-0.213448	5.96842e-05
ZNF773	0.529928	2.02175e-10		ARG2	0.270177	6.00712e-05
NA	-1.19292	2.09543e-10		CAD	-0.263329	6.13033e-05
PARP1	-0.800836	2.09694e-10		ZNF761	-0.379531	6.15051e-05
IRS1	-0.685664	2.10475e-10		XPO4	-0.398153	6.16249e-05
PEA15	-0.415731	2.10847e-10		CNOT9	-0.208714	6.16249e-05
MYBPC1	-1.96188	2.15296e-10		DARS2	-0.228885	6.18187e-05
CDK8	0.523746	2.17288e-10		SNAI2	-1.16516	6.19518e-05
RAN	-0.371334	2.23799e-10		BTN2A2	0.486042	6.24295e-05
TARDBP	-0.266873	2.249e-10		CLCN3	0.271156	6.29728e-05
CDC42EP2	-0.62853	2.28195e-10		PIGT	0.340885	6.4049e-05
DUXAP9	-0.755422	2.28718e-10		RNF144B	0.524966	6.53277e-05
SERPINI1	0.805175	2.28836e-10		LRCH1	-0.446943	6.57642e-05
CACYBP	-0.421135	2.31703e-10		OCIAD2	0.332793	6.60742e-05
FTO	0.315448	2.33595e-10		PIF1	-0.446063	6.6847e-05
PAICS	-0.328392	2.47706e-10		S1PR3	-0.48986	6.6847e-05
TNFRSF10A	-0.367977	2.57339e-10		C1RL	0.30895	6.70806e-05
SLC2A1	-0.454394	2.6408e-10		ODC1	-0.186222	6.76299e-05
CCDC32	0.509492	2.89493e-10		PWP1	-0.286294	6.83777e-05
CHCHD3	-0.401449	2.90496e-10		CPS1	0.362841	6.92073e-05
NUP153	-0.427891	2.97112e-10		SLC37A1	0.291419	6.99183e-05
ITPR2	0.612333	3.01011e-10		NUP58	-0.363555	7.04714e-05
LINC00963	0.38633	3.05367e-10		PLEKHH3	0.35857	7.06395e-05
STAT2	0.349298	3.08832e-10		SLC12A6	0.312647	7.23158e-05
EEF2K	-0.31673	3.12195e-10		APH1B	0.400136	7.39166e-05
ATP8A1	0.94532	3.17643e-10		GGA2	-0.177801	7.39626e-05
CDH26	0.659492	3.18202e-10		EIF1AD	-0.288019	7.44731e-05
NUP155	-0.47134	3.2413e-10		DDX31	-0.266009	7.53753e-05
CNOT9	-0.302892	3.25933e-10		IRS1	-0.462417	7.56672e-05
PYCR3	-0.529376	3.2965e-10		MTIF2	-0.303645	7.59543e-05
ERLIN1	-0.469877	3.32265e-10		RNF130	0.236042	7.60533e-05
GDPD1	0.782247	3.32265e-10		GEMIN6	-0.373432	7.63769e-05
TPP1	0.349262	3.41722e-10		WDR25	0.431646	7.69509e-05
NA	-0.312139	3.44999e-10		ALKBH7	0.57702	7.75422e-05
CREBL2	0.417231	3.47273e-10		HADHB	0.198846	7.76731e-05
ST5	0.649389	3.53478e-10		COPS3	-0.299969	7.78713e-05
RIOK1	-0.542837	3.54013e-10		CCT4	-0.2019	7.79337e-05
GYG1	-0.354753	3.54803e-10		SH3KBP1	0.376316	8.01557e-05
LETM1	-0.629863	3.5765e-10		CAMK1D	1.1452	8.05983e-05
ATP2A2	-0.251196	3.68958e-10		SCO1	-0.250934	8.08062e-05
B4GALNT1	0.641817	3.7043e-10		KCND2	-0.565651	8.13937e-05
HNRNPR	-0.272838	3.7578e-10		TRA2B	-0.273403	8.14162e-05
ZSCAN18	0.548347	3.78951e-10		RPA1	-0.160731	8.19657e-05
NOCT	-0.574695	3.81078e-10		BVES	0.86336	8.26349e-05
PLK4	-0.546008	3.88781e-10		HPRT1	-0.430814	8.31545e-05
SLC25A33	-0.409143	3.91265e-10		PDCD4-AS1	0.846047	8.48909e-05
FANCE	-0.684022	3.96395e-10		FBXO38	-0.256006	8.76712e-05
BCL11B	1.5192	4.02733e-10		SLC16A9	0.511772	8.77203e-05
FOXRED2	-0.304716	4.15432e-10		GPX8	0.538216	8.77346e-05
TWSG1	0.461822	4.15432e-10		BEST1	0.861652	8.90288e-05
SPEN	-0.464097	4.20083e-10		ABTB2	0.411862	9.02128e-05
SMAD3	0.584234	4.27254e-10		F2RL1	-0.284406	9.03883e-05
PHC1	0.62379	4.44195e-10		CENPP	-0.323862	9.10029e-05
MOV10L1	2.9355	4.46386e-10		CANT1	-0.211099	9.20135e-05
RNF24	0.351324	4.56898e-10		MAP1LC3A	0.832591	9.20979e-05
CCNDBP1	0.493	4.7463e-10		CDCA5	-0.261375	9.20979e-05
TMEM97	-0.647154	4.89055e-10		PHPT1	0.408702	9.32189e-05
EXOSC7	-0.41572	4.95828e-10		CD55	1.24272	9.35587e-05
YTHDF1	-0.26051	5.0309e-10		TRMU	-0.231872	9.42464e-05
CLSPN	-1.21252	5.13545e-10		SLC13A3	0.584762	9.43878e-05
SLC43A1	-0.408477	5.20243e-10		RPL7L1	-0.17573	9.44274e-05
KLHL29	-0.553969	5.20673e-10		CCT2	-0.236191	9.53846e-05
FAM174A	0.585806	5.29154e-10		DDX55	-0.208281	9.54832e-05
CEP152	-0.510661	5.36321e-10		MR1	0.536592	9.60093e-05
BMS1	-0.730415	5.56324e-10		MMS22L	-0.603282	9.61521e-05
FKBP9	0.378555	5.61586e-10		MYRIP	0.25524	9.70792e-05
ARHGDIA	-0.442825	5.65125e-10		DNAJA1	-0.228403	9.72679e-05
ATXN7L1	0.553812	5.77663e-10		TSPYL2	0.505932	9.72679e-05
ERV3-1	0.76741	6.11567e-10		CLU	0.432758	9.74108e-05
MTR	-0.429652	6.16253e-10		ZNF524	0.507799	9.75078e-05
CIT	-0.506839	6.1711e-10		RBBP7	-0.188218	9.76244e-05
CCNI	0.425592	6.50887e-10		GRHL2	-0.169452	9.88976e-05
CALU	-0.349058	6.50929e-10		IL4R	0.65081	9.93624e-05
EPB41L5	0.431154	6.8872e-10		OXCT1	-0.185632	9.93624e-05
TLNRD1	-0.780691	6.98372e-10		PUS3	-0.291393	9.94091e-05
ARHGAP1	-0.381767	7.05352e-10		CD177	1.37066	9.94284e-05
LDHB	-0.33919	7.05662e-10		MICAL2	-0.217591	9.9595e-05
SLC41A2	1.09254	7.05662e-10		ACTR3	-0.214665	9.96328e-05
NOL11	-0.470814	7.20969e-10		CAPN1	0.271545	0.000100137
BCAM	0.537381	7.23343e-10		RAP1GAP2	-0.222795	0.000100897
RNF126	-0.48097	7.42326e-10		FHDC1	-0.263607	0.000100897
ELOVL1	-0.421875	7.43598e-10		CAPN13	0.471127	0.000101045
MSRB3	1.28216	7.69813e-10		RNF208	0.496003	0.000101045
LINC00649	0.73795	7.81759e-10		PLXNA3	0.475404	0.00010269
DHX9	-0.269045	7.96032e-10		ZNF580	0.501029	0.000105543
ZNF627	0.385868	7.9769e-10		ACTL6A	-0.277072	0.000105551
IMPA2	-0.413384	8.06689e-10		UBE2E3	-0.325508	0.00010644
VWA2	1.66419	8.13884e-10		YPEL3	0.569167	0.000106819
PNO1	-0.469591	8.15197e-10		ORAI2	0.594195	0.000107121
LINC01003	0.835899	8.18633e-10		RPIA	-0.376275	0.000108839
RNF26	-0.385881	8.40455e-10		ZFAND3	0.204554	0.000108989
PPM1A	-0.408279	8.47645e-10		PLA2G4E	-2.24463	0.000109323
VIM	0.630709	8.5467e-10		URB1-AS1	0.539511	0.000109339
MFN2	-0.397403	8.77035e-10		NME3	0.494337	0.000109704
SORBS3	0.562215	8.8106e-10		UGDH-AS1	0.547273	0.000109704
SLC2A3	-5.89265	8.84797e-10		FRAS1	0.565696	0.000109816
TFRC	-0.405279	9.05989e-10		ISCA1	-0.371653	0.000110271
BRIX1	-0.593576	9.24698e-10		DOCK8	-1.86235	0.000110848
ASPH	0.253233	9.24698e-10		HSPA4	-0.285125	0.000111267
SEMA6D	-1.79638	9.4169e-10		BCAM	0.368034	0.000111369
EPS15L1	-0.344984	9.41954e-10		HDAC2	-0.270382	0.000111369
BAZ1A	-0.374022	9.44632e-10		TMEM134	0.432358	0.000111495
TBRG4	-0.373825	9.50194e-10		TTC39A	0.484763	0.000113726
MAST4	0.388614	9.521e-10		EXTL2	-0.48486	0.000114579
U2AF1	-0.304607	9.60136e-10		UNC119	0.372255	0.000114727
GRK6	-0.510163	9.61136e-10		MYCBP	-0.429936	0.000114986
DLST	-0.302719	9.80961e-10		SORD	-0.204843	0.000115603
AL008707.1	-2.29171	9.84379e-10		TTC27	-0.332304	0.000115873
AIG1	0.403701	9.99703e-10		PGAP3	0.451583	0.000119502
PRIM2	-0.604941	1.03901e-09		HOGA1	0.562676	0.000119625
LARS2	-0.269179	1.04923e-09		GALNT18	0.363598	0.000122117
CHMP3	0.431225	1.06024e-09		CYSTM1	0.430049	0.000122117
POLR3K	-0.547105	1.07915e-09		ACOT11	0.472718	0.000122791
EXOC4	0.328963	1.10735e-09		SNRPD1	-0.280978	0.000122791
RAB5B	0.444515	1.11998e-09		C1orf174	-0.29185	0.000123564
CDK5R1	-0.499872	1.12095e-09		UGDH	0.249602	0.000126156
TMEM177	-0.497781	1.12366e-09		DGCR6	0.469214	0.000126497
CORO1C	-0.273317	1.17259e-09		NANOS1	1.12754	0.00012737
BBS2	0.383569	1.1727e-09		CDC20P1	-0.649304	0.000128129
CDKN3	-0.447764	1.26329e-09		SERPINI1	0.539277	0.000128971
CORO2A	-0.328208	1.27962e-09		SKA3	-0.433011	0.000129414
RRP9	-0.63873	1.29147e-09		SNORD12	-0.692181	0.000130086
RNPS1	-0.327217	1.29232e-09		LRR1	-0.460404	0.000131092
GABRA3	0.685598	1.29735e-09		SPATA5	-0.290659	0.000132164
OSBPL6	0.630596	1.30153e-09		C19orf48	-0.306741	0.000133475
TRIM16L	0.58445	1.32458e-09		TFDP1	-0.200664	0.000134114
HPN	0.473151	1.32805e-09		ZNF48	0.425906	0.000135465
TUBA1C	-0.408236	1.33039e-09		DUSP7	-0.303973	0.000135682
CDC23	-0.346407	1.34869e-09		RARG	0.292825	0.000135731
MALINC1	0.626367	1.43299e-09		NFAT5	0.390383	0.000136379
RALB	0.437675	1.43354e-09		NOP2	-0.267316	0.000136408
FBXO38	-0.365186	1.43405e-09		CORO1C	-0.187153	0.000137577
EMC8	-0.391743	1.43677e-09		RPS6KL1	0.429437	0.00013802
FAM111B	-0.958681	1.44794e-09		AEN	-0.238753	0.000138182
TAPBP	0.592997	1.47167e-09		ZFHX2	0.517656	0.00013907
FAM118B	-0.401232	1.50242e-09		UBXN6	0.37268	0.000140965
CRNDE	0.812395	1.5149e-09		ALPK1	0.526529	0.000141813
TMOD2	0.60721	1.55987e-09		COMMD7	0.29025	0.000144048
EIF4A3	-0.369028	1.55987e-09		IRF1	0.731124	0.000145181
HS6ST2	0.833328	1.55987e-09		METTL2B	-0.234981	0.00014691
TGIF1	0.36214	1.55987e-09		SHROOM1	0.375007	0.000148938
ZNRF3	-0.336578	1.55995e-09		H2AFZ	-0.236845	0.00014911
KIF2C	-0.371646	1.56677e-09		DSG1-AS1	-0.640886	0.000149747
SNHG15	-0.489559	1.5939e-09		GAB1	0.453625	0.000151125
PANK2	-0.319906	1.61066e-09		PRSS16	0.669911	0.000151365
TMSB4X	1.31234	1.6237e-09		TUBA1B	-0.259425	0.00015282
C21orf58	-0.470839	1.64593e-09		STK32A	1.10268	0.000153165
CCT4	-0.286071	1.6566e-09		AC092171.5	0.514452	0.000153542
GSTA4	0.713043	1.70624e-09		AC103706.1	0.553228	0.000156904
RBP5	1.50249	1.71204e-09		NA	0.391144	0.000157176
SLC35D2	0.609302	1.71481e-09		TIAL1	-0.196034	0.000157424
RNF43	0.454267	1.73299e-09		NOP16	-0.372242	0.000157992
DHX37	-0.768499	1.73684e-09		GBE1	-0.24496	0.000157992
ABCG1	0.600732	1.73684e-09		FSIP1	0.795777	0.000158141
EYA3	-0.262136	1.7563e-09		PHLPP2	-0.238397	0.000158262
NOS3	1.51293	1.78996e-09		THADA	-0.30953	0.000158356
OGFRL1	0.584585	1.82343e-09		RPS6KC1	-0.248042	0.000158734
DPP4	-0.979841	1.8963e-09		VANGL2	0.698819	0.000161201
AC006504.1	0.862567	1.95215e-09		CSKMT	-0.305336	0.000162603
ANKLE2	-0.261346	1.97725e-09		FLVCR2	0.591532	0.00016445
FARSB	-0.445842	1.98889e-09		LYRM9	0.837528	0.00016445
PKP1	-2.46599	2.01963e-09		GPSM2	-0.302159	0.000164737
EPHX1	0.407659	2.03666e-09		AC080112.1	0.564458	0.000164737
CCDC191	0.964958	2.04428e-09		DTX3	0.870995	0.000165019
HSD17B4	-0.287492	2.05008e-09		RAF1	-0.194025	0.000165076
CFAP69	0.776394	2.08215e-09		RAB6B	0.338268	0.000165488
RRP8	-0.385606	2.11046e-09		PRKAG2-AS1	1.05676	0.000165982
GPAT4	-0.312049	2.13743e-09		ZNF398	-0.229011	0.00016643
COTL1	-0.446483	2.17147e-09		TWF2	0.577331	0.00016677
ANAPC7	-0.273078	2.17147e-09		NCAPG	-0.453833	0.000166946
PCBP4	0.619476	2.18556e-09		CHMP4C	0.319374	0.000167133
TIPIN	-0.533318	2.19613e-09		FPGS	0.315794	0.000167415
CHERP	-0.472292	2.20433e-09		RBL1	-0.363103	0.000167569
PDP1	0.622936	2.34138e-09		PCDHGB3	0.68812	0.000168761
CNBD1	1.40017	2.35414e-09		FAM189A1	0.815739	0.000169767
RPIA	-0.534665	2.45775e-09		TMEM125	0.460323	0.00017074
NEIL2	-0.382156	2.474e-09		SUMF2	0.224603	0.000172911
NA	0.775594	2.50704e-09		CCDC32	0.335791	0.000174215
SLC39A13	0.743309	2.56629e-09		C11orf71	0.433093	0.000175128
SPATA5	-0.416512	2.60592e-09		HLCS	0.203007	0.000177417
SNRPD1	-0.403346	2.63347e-09		CCDC117	-0.26337	0.000177417
UTP14A	-0.448455	2.64498e-09		API5	-0.314136	0.000178145
WRAP53	-0.561567	2.64837e-09		FASTKD5	-0.241092	0.000178353
WDR77	-0.356851	2.67069e-09		CASP8AP2	-0.428567	0.000178789
FGFR3	-0.919933	2.68005e-09		PHC1	0.41735	0.000179641
REXO4	-0.659279	2.68005e-09		EARS2	-0.171902	0.000182461
EARS2	-0.250035	2.77955e-09		ERLIN1	-0.305342	0.000183548
CHD8	-0.24499	2.85292e-09		MAP1LC3B	0.291301	0.000186584
GNB1	0.173878	2.90672e-09		ZBTB2	-0.384804	0.00018667
VWA5A	1.02394	2.98504e-09		CALCOCO1	0.522554	0.000188791
AK4	-0.382049	2.98946e-09		ACAT2	-0.242282	0.000190633
MLEC	-0.224819	3.00457e-09		AIG1	0.270356	0.000190749
NMT1	-0.286941	3.00925e-09		CLINT1	-0.209666	0.000192666
PDE10A	0.51601	3.03438e-09		COPG1	0.199165	0.000192666
MGAT4A	0.844565	3.06797e-09		SAMD12	0.39393	0.00019435
ATRN	0.271133	3.11712e-09		MICAL1	-0.456197	0.000195337
HINT3	0.555667	3.11712e-09		ZNF542P	-0.287726	0.000195493
HOXC9	0.768639	3.14737e-09		AP1G2	0.309189	0.000197496
FAM161B	0.740846	3.14801e-09		MAJIN	1.15927	0.000197864
ZBTB20	0.922692	3.16545e-09		ZC3H14	-0.204516	0.000199202
CNGA1	1.39662	3.26661e-09		ANKRD13A	0.207285	0.000200056
FANCG	-0.480348	3.31937e-09		PIAS1	-0.287208	0.000201554
PDE12	-0.312202	3.42536e-09		NUAK1	0.456978	0.000201554
TMEM144	0.553728	3.63788e-09		MAGED2	0.253667	0.000201554
CENPM	-0.539233	3.6546e-09		MPZL1	-0.154436	0.000201554
TRIM38	0.539044	3.73663e-09		RNY1	-2.14243	0.000201554
GABRE	-0.643637	3.75598e-09		SOAT1	-0.427746	0.000201962
RANGAP1	-0.768621	3.83216e-09		TBL1X	-0.156251	0.000204115
DDX24	-0.321432	3.83551e-09		EDN2	0.736692	0.000204786
PTPDC1	0.605014	3.87524e-09		MICU1	0.219722	0.000207711
MTAP	-0.480858	3.92456e-09		ALDOC	0.316243	0.000207711
ARIH2	-0.238951	3.97335e-09		TIPIN	-0.359407	0.000209272
TLE1	0.400053	3.97877e-09		MMP11	0.57444	0.000210471
MAPKAPK2	0.391148	3.98492e-09		SF3A3	-0.210966	0.000212675
SLC25A13	-0.389911	4.21788e-09		FIGNL1	-0.259001	0.000214119
TP53I11	0.436433	4.28089e-09		ATMIN	-0.232154	0.000215254
TTLL1	0.617865	4.29972e-09		ATP9A	0.19663	0.000217607
ADGRG6	0.44127	4.29972e-09		PIMREG	-0.269657	0.000217972
RAD51AP1	-0.56363	4.32306e-09		PRPF4B	-0.300229	0.000219584
NA	-0.673321	4.32306e-09		ZNF584	-0.262776	0.000219985
IL17RD	0.564012	4.35624e-09		TIMM9	-0.333328	0.000221166
GSK3B	0.342904	4.39857e-09		RNU2-61P	-1.79426	0.000223456
NUP210	-0.309251	4.4805e-09		CCSAP	-0.325284	0.000223997
FBLIM1	0.98983	4.49456e-09		ADH1C	-1.12225	0.000223997
VPS8	0.434979	4.65732e-09		PRUNE2	0.186369	0.00022698
TMED10	0.3961	4.66449e-09		DDX20	-0.391823	0.000227538
CEP55	-0.453265	4.78165e-09		ABCF2	-0.2315	0.000227795
RBBP7	-0.261486	5.02566e-09		CPEB4	0.254783	0.000228461
SUPV3L1	-0.305761	5.06452e-09		TAPBP	0.400522	0.000228562
RAB6B	0.477685	5.10157e-09		SLC25A32	-0.430302	0.000229927
SLC13A3	0.793741	5.11322e-09		WASF2	-0.17939	0.00023068
PBLD	0.595555	5.14064e-09		HMGB2	-0.291138	0.000231898
USP43	-0.426135	5.16176e-09		PANX2	0.491176	0.000234523
ZNF589	-0.552433	5.16553e-09		LIN52	-0.327775	0.000235151
CDK1	-0.565478	5.36799e-09		EPS15L1	-0.226128	0.000237902
LNX2	0.318603	5.82605e-09		KLC4	0.582237	0.00023798
AZGP1	-0.592015	5.92644e-09		RMI2	-0.408479	0.00023798
BEX4	0.74836	6.00288e-09		PTCD3	-0.273433	0.000238042
2011-09-01	0.309204	6.09282e-09		UCHL5	-0.505722	0.000239366
STK35	-0.280014	6.10877e-09		BTG1	-0.199802	0.00023946
FOXO3	0.382018	6.21306e-09		NQO2	0.371978	0.000239557
AC131392.1	0.898817	6.36408e-09		HEBP2	-0.274713	0.000239947
COBL	0.353862	6.42423e-09		ENOPH1	-0.220907	0.000239947
TNRC6B	0.353281	6.47437e-09		LRRC75B	0.489924	0.000240813
WBP2	0.387816	6.49763e-09		IDI1	-0.366314	0.000240829
AC006111.2	-1.0757	6.57424e-09		PPDPF	0.368067	0.000242653
LIMD2	1.29812	6.61381e-09		HIST1H2BJ	-0.359562	0.000245867
UTP6	-0.305027	6.62955e-09		GPATCH8	-0.221205	0.000246277
TMEM136	0.499239	6.65459e-09		NAT1	-0.475473	0.000248051
IFNGR2	0.544073	6.69792e-09		FLVCR1	-0.314738	0.000248924
LINC01184	0.523384	7.00654e-09		BOK	0.412976	0.000248924
MICAL2	-0.298823	7.08156e-09		KLK4	-0.325908	0.000249042
XRCC6	-0.340858	7.34224e-09		H1F0	-0.156056	0.000250935
YARS2	-0.36005	7.43369e-09		PEX11G	0.580188	0.000251842
RTN4RL1	0.824808	7.44142e-09		GADD45A	0.514337	0.0002521
2006-09-01	0.419377	7.53899e-09		GTF2IRD1	0.305891	0.000252329
RIMS3	0.836992	7.8334e-09		NCAM2	0.205757	0.00025539
BRPF1	-0.447637	7.86758e-09		SDCBP	-0.32014	0.000255963
PER2	-0.363527	7.90167e-09		SULT2B1	0.483547	0.00025602
MAD2L1	-0.623715	7.97019e-09		PGM2	-0.198862	0.000256871
HID1	0.441755	7.97481e-09		AQP3	0.370606	0.000257539
H2AFZ	-0.334377	8.05201e-09		NGLY1	-0.299784	0.000258739
FAM198B-AS1	0.631149	8.05907e-09		CXXC5	0.308474	0.000263011
PPM1H	0.287572	8.07509e-09		ANTXR1	0.361643	0.000265988
UBE2C	-0.469035	8.14093e-09		MINDY1	0.425602	0.000266933
GPR137B	0.519233	8.41826e-09		SMC4	-0.458113	0.000267729
ATP2C2	0.74409	8.56168e-09		DNAJC1	-0.194263	0.00026822
ZSWIM5	0.944581	8.63161e-09		MAP4	0.167522	0.000268251
UBQLN2	0.243055	8.88608e-09		PDK2	0.316164	0.000269476
TRA2B	-0.372288	8.98606e-09		WNT4	1.05192	0.000271307
CDKN1A	0.387305	9.01172e-09		AKAP12	-1.51579	0.000275091
DHX30	-0.332497	9.03188e-09		MAN2A2	0.231598	0.000276444
CYTH3	0.283006	9.03238e-09		SLC20A1	-0.193043	0.000278213
NTMT1	-0.608054	9.03238e-09		UTP11	-0.284323	0.000278213
ZFYVE1	0.444648	9.24012e-09		TMC6	0.343931	0.000279041
PPM1D	-0.364986	9.2807e-09		SLC35B4	-0.259018	0.000279079
PPM1L	0.761882	9.3018e-09		IMPDH1	-0.276412	0.000280715
ALDH1A3	-0.416744	9.3688e-09		IRF5	0.468199	0.000282382
LYRM9	1.14956	9.42668e-09		TOP1	-0.184159	0.000282682
VCL	-0.233752	9.52643e-09		CDT1	-0.257565	0.000283404
GRHL2	-0.231631	9.93595e-09		RFNG	0.378527	0.000284214
KIAA0930	-0.416406	9.97322e-09		TMEM109	-0.257752	0.000284242
MIS18A	-0.444733	1.00271e-08		RIMKLA	0.266206	0.00028447
NMRK1	0.681611	1.02288e-08		TEX10	-0.359514	0.000284553
ATRIP	-0.49765	1.02439e-08		KPNA3	-0.458354	0.000285381
HOGA1	0.761932	1.05426e-08		RPS10P7	0.618073	0.000285381
SEL1L	0.361736	1.07663e-08		EFNA1	0.335628	0.000285438
SAMD8	0.480413	1.08681e-08		MIA3	0.181715	0.000285913
NA	-1.12595	1.10571e-08		LONRF2	0.446407	0.000286117
NPM1	-0.355983	1.11731e-08		AC131392.1	0.626316	0.000286526
2010-09-01	0.474688	1.12363e-08		LPO	2.07501	0.000288377
MIGA1	0.512307	1.1423e-08		LDHB	-0.217206	0.000289991
ZWILCH	-0.579252	1.14364e-08		KIAA0319L	0.199974	0.000289991
TEX264	-0.446492	1.15457e-08		SLAIN1	-0.277813	0.000291196
MIDN	0.360506	1.15552e-08		UBIAD1	-0.240261	0.000291321
YEATS2	-0.229384	1.16874e-08		MAFG	0.288079	0.000291459
RMC1	-0.352155	1.17389e-08		DEFB132	-0.619302	0.000293961
UHRF1BP1	0.259692	1.18586e-08		TRIM38	0.366907	0.000294192
RAB30	0.673599	1.21198e-08		NR1H2	0.315616	0.000294526
STAG1	-0.414891	1.31353e-08		SLC41A3	0.285772	0.000294899
PRSS16	0.903562	1.31985e-08		LGALS8	0.334876	0.00029848
SRPK1	-0.364704	1.33145e-08		RIMS1	0.259445	0.00029941
LIG1	-0.694219	1.33326e-08		HLA-C	0.38445	0.000302549
USP31	-0.3153	1.34404e-08		AC092894.1	0.79704	0.000303596
TOMM40L	-0.442578	1.35271e-08		CDCA3	-0.391943	0.000303932
ZMYND11	0.327418	1.3847e-08		OSBPL6	0.420751	0.000305629
ENOPH1	-0.313929	1.47729e-08		CIP2A	-0.511399	0.0003058
MSI2	0.387327	1.50562e-08		RCC1	-0.327965	0.000306024
SDAD1P1	1.03404	1.53436e-08		NOTCH3	0.423479	0.000311276
ZNF117	1.40967	1.55013e-08		C1QTNF6	0.529414	0.000311276
AF111167.2	1.14271	1.55632e-08		SPC25	-0.504622	0.000315501
STRIP2	-0.498218	1.63638e-08		CPSF3	-0.252905	0.000317175
DBNDD1	0.419171	1.64566e-08		INHBB	0.444007	0.000317829
SLC25A15	-0.359469	1.6828e-08		PACS1	-0.303886	0.000319234
ACTRT3	1.06252	1.68428e-08		CAST	0.205948	0.000319294
VANGL2	0.937067	1.77894e-08		EPHA10	0.546335	0.000319294
TRIM3	-0.517254	1.78725e-08		SYNCRIP	-0.481536	0.000323559
HEATR1	-0.385823	1.8041e-08		C11orf68	0.427878	0.000325214
DHX34	-0.500643	1.81074e-08		ALDH1B1	-0.181031	0.000328185
PMAIP1	0.562428	1.89809e-08		GARNL3	0.318521	0.000328334
TUBGCP4	-0.34053	1.91142e-08		P4HB	0.237605	0.000332382
CD59	0.356314	1.92076e-08		CDC42SE1	-0.159558	0.000332382
DOCK3	0.655462	1.92076e-08		ATP13A2	0.329782	0.000334852
HSP90AA2P	-0.979412	1.94203e-08		PA2G4	-0.26711	0.000335105
ANKS1B	0.734848	1.98591e-08		KPNA4	-0.305066	0.000335105
SPOCK1	-1.64795	2.00314e-08		NA	-0.292886	0.000338509
METAP1	-0.381455	2.00314e-08		CCDC191	0.65205	0.000339411
WDR90	-0.50069	2.01568e-08		CYB5D1	-0.23215	0.00034045
NEU1	0.660526	2.07969e-08		MRRF	-0.213279	0.000340728
CHRAC1	-0.450485	2.08251e-08		P4HTM	0.319287	0.000341116
TERT	-1.25045	2.09627e-08		SLC50A1	0.324031	0.000343334
XPOT	0.469024	2.09964e-08		POLR2B	-0.247885	0.000344305
TROAP	-0.530258	2.1089e-08		TUT7	-0.301024	0.000344736
FBXL16	0.497789	2.11687e-08		FAM111B	-0.616993	0.000344736
TMEM159	0.452401	2.1445e-08		TRAK1	-0.194128	0.000344805
TAF4	-0.399749	2.14789e-08		ACOT8	0.384099	0.000346091
ZFHX2	0.694447	2.16679e-08		GOT2	-0.191225	0.000347818
NTNG1	-0.956898	2.16887e-08		NUDT15	-0.335802	0.000349881
SPATA20	0.395497	2.20286e-08		HUS1	-0.205629	0.000349881
EIF1AD	-0.377903	2.21618e-08		ZFX	-0.226745	0.000351815
FARSA	-0.527888	2.22425e-08		MTMR1	-0.279285	0.00035282
C5orf38	0.727903	2.22493e-08		ASAP2	0.261346	0.000353822
FAM151B	-0.931359	2.27099e-08		SNRNP40	-0.234258	0.000355276
SPATS2	0.281836	2.283e-08		LINC01687	0.377389	0.000356082
DMTN	0.546442	2.283e-08		BTD	0.285519	0.000356278
PYROXD1	0.691282	2.28796e-08		CCNE2	-0.495721	0.000358314
ACADSB	0.330653	2.33674e-08		C3orf18	0.470095	0.000358725
GRIK2	0.639817	2.35691e-08		KIF14	-0.463282	0.000359992
SLC25A36	0.739865	2.42291e-08		CDK12	-0.142448	0.000361261
ZMAT1	1.81712	2.55042e-08		CDC25B	-0.253742	0.0003634
RBMX	-0.281088	2.58657e-08		CNTNAP2	-0.407463	0.000364284
TAPT1	0.51328	2.69675e-08		SPINT2	0.356755	0.000366288
ARF6	-0.429586	2.73969e-08		AKAP1	-0.383189	0.000367761
FBXO21	-0.228118	2.77794e-08		PRRT3	0.522212	0.000367761
C12orf49	0.384001	2.80272e-08		RARB	-0.498486	0.000368106
ZBTB2	-0.52747	2.86197e-08		E2F2	-0.311315	0.000369304
PSAP	0.304681	2.89196e-08		PCLAF	-0.349933	0.000370084
PPM1F	-0.619224	2.90597e-08		SELENOM	0.515156	0.000370084
PPP1R14C	0.487293	2.96759e-08		YPEL5	0.413928	0.000372287
MANF	-0.451809	2.97384e-08		ROGDI	0.374136	0.000377236
SNHG12	-0.436698	2.97812e-08		PRPF38A	-0.171731	0.000378002
RUVBL1	-0.37159	3.00346e-08		DNAJC6	0.784808	0.000378076
ORC5	-0.665852	3.0151e-08		PWP2	-0.331343	0.000378076
ABCB10	-0.351867	3.03125e-08		PGM1	0.235427	0.000383667
KDM3A	0.348812	3.04573e-08		ZNF821	0.454122	0.000387482
LHFPL2	0.648261	3.06349e-08		WNT9A	0.849483	0.000387767
CD55	1.60952	3.07924e-08		AHCTF1	-0.325173	0.000387767
SLC35F6	0.274112	3.1175e-08		RAB26	0.386197	0.000388834
SLC19A2	-0.42708	3.15623e-08		ELP2	-0.239749	0.000389396
MTPAP	-0.344432	3.17199e-08		CAMLG	0.2978	0.000390093
POGK	-0.255104	3.2079e-08		CNOT1	-0.159411	0.000395059
REEP1	1.0213	3.24242e-08		HMGXB4	-0.168949	0.000395895
PRKAR2B	0.458326	3.33076e-08		FASTKD1	-0.458208	0.000396654
MB	0.462632	3.44045e-08		ZFPM2-AS1	0.449989	0.000400422
BUD13	-0.406393	3.44574e-08		ZNF561-AS1	0.382506	0.000400422
SYNJ1	-0.569129	3.45798e-08		AES	0.276763	0.000402781
LRR1	-0.618272	3.46908e-08		LAMB1	0.422113	0.000404931
TCEA1	0.427164	3.5127e-08		HAUS6	-0.442381	0.000406068
NXT1	-0.61809	3.55369e-08		PCED1A	0.360418	0.000414112
PPFIA2	0.377876	3.55786e-08		CHCHD4	-0.30702	0.000416557
NEMP1	-0.406252	3.60463e-08		VASP	0.295864	0.000417643
HMGCR	-0.345177	3.61898e-08		MTERF3	-0.435532	0.000417643
CUEDC1	0.593774	3.71201e-08		GOLPH3L	0.32113	0.000418868
AARS	0.514213	3.75928e-08		TTK	-0.632616	0.000422518
PIF1	-0.570809	4.0835e-08		MDK	0.487971	0.000423771
RDH11	0.257551	4.16228e-08		NEIL1	0.636405	0.000426839
ADAM28	-2.41008	4.16813e-08		CPSF2	-0.261413	0.000426839
IRF1	0.962759	4.16813e-08		ATP2C2	0.498086	0.000427405
YPEL3	0.736995	4.21907e-08		IRF2BP2	0.239337	0.000429849
CLPTM1L	-0.336155	4.2369e-08		HMGXB3	-0.228162	0.000432184
UBN1	-0.377358	4.2369e-08		VASH2	-0.317517	0.000434862
UBL3	0.366444	4.28823e-08		MYLK	0.481102	0.000435291
FBXO44	0.571417	4.36709e-08		CDCP1	-0.182792	0.000435731
RNASEH2A	-0.535925	4.3948e-08		EFCC1	1.24203	0.000437712
KLHL1	0.620907	4.42115e-08		PANK2	-0.204925	0.000439704
DKC1	-0.675494	4.42799e-08		RNF43	0.295675	0.000444177
BEST1	1.11902	4.46944e-08		FGF13	0.74292	0.000444177
RBCK1	0.454441	4.47659e-08		SHC1	0.233124	0.000444177
FAM84B	0.269628	4.48969e-08		MPG	0.492364	0.000444695
LRRC59	-0.514353	4.55574e-08		SECTM1	0.463515	0.000446364
RPS6KA4	-0.667999	4.68692e-08		YIPF2	0.343155	0.000450763
SUV39H1	-0.719192	4.72708e-08		NFATC2IP	-0.173537	0.000454633
TCP11L1	0.477525	4.72989e-08		RPF2	-0.276883	0.000454633
RSL1D1	-0.277644	5.10336e-08		PIK3R4	-0.214519	0.000455451
SLC16A10	-0.583301	5.12705e-08		LAPTM4B	0.228518	0.000460485
SIDT2	0.338738	5.14765e-08		SPRY1	-0.342052	0.000460525
SLC1A3	-0.64066	5.32829e-08		HBEGF	0.402376	0.000461389
PEX26	-0.290692	5.32882e-08		SLC26A11	0.399183	0.000463046
EWSR1	-0.293053	5.36729e-08		GUSBP9	0.530049	0.000466302
SLCO5A1	0.454986	5.37191e-08		HAUS1	-0.314497	0.000467533
SUSD4	0.801862	5.44848e-08		MBD5	0.350942	0.000470497
DDX56	-0.382874	5.51732e-08		SLC5A6	-0.228631	0.000472388
CCM2	-0.404395	5.51732e-08		HIST1H2BK	-0.296737	0.000472388
PTPN21	-0.40838	5.56953e-08		SENP1	-0.216618	0.000474595
ETF1	-0.25195	5.56953e-08		NLN	-0.18562	0.000477845
FAM149B1	0.447008	5.61922e-08		ZNF674	0.477057	0.000477845
NAF1	-0.45804	5.73701e-08		LDHD	0.395657	0.000477887
ZSWIM6	0.535019	5.74843e-08		AC100768.2	0.651794	0.000478978
TNKS	0.331848	5.80648e-08		PPP1R8	-0.203915	0.000494766
MNS1	-1.03029	5.83225e-08		HACD2	-0.38524	0.000498566
RHNO1	-0.338476	5.96814e-08		DUSP22	0.357823	0.000499074
CDC14A	0.524943	6.04e-08		DIAPH3	-0.333995	0.000499451
SLC6A8	-0.2941	6.06448e-08		GEMIN4	-0.243903	0.000503954
AC138409.2	0.674086	6.06685e-08		PASK	-0.251778	0.000504941
DNAJC6	1.07528	6.12297e-08		TIFA	-0.441091	0.000510191
DDX19A	-0.401382	6.17161e-08		PGAM5	-0.267401	0.000511376
CTBS	0.654776	6.19842e-08		MTAP	-0.310363	0.000512528
LRRC47	-0.421043	6.36859e-08		CISD1	-0.340091	0.000512528
MEN1	-0.406337	6.37408e-08		NMNAT2	0.334389	0.000513325
TIFA	-0.629418	6.42835e-08		ZC3HAV1	-0.195799	0.000515023
TRIM28	-0.418068	6.47558e-08		YBX3	-0.18419	0.00051807
RUNDC3A-AS1	0.6416	6.53909e-08		LIG3	-0.194421	0.000520149
FUT11	-0.461094	6.54717e-08		TMEM97	-0.395654	0.000520149
DUBR	-0.578762	6.62803e-08		ERGIC3	0.27995	0.000520149
IRF2BP2	0.336238	6.70165e-08		RHBDD1	0.235248	0.000520715
SCAP	-0.357594	6.87543e-08		LRRC24	0.865786	0.000520715
TOM1L1	0.319141	6.87543e-08		DNAJB2	0.355277	0.000522186
HOMEZ	0.405145	6.88834e-08		R3HDM2	0.293407	0.000522474
RAD54B	-0.659973	6.97202e-08		EXOSC10	-0.206279	0.00052646
TRAF2	-0.645302	7.09165e-08		KDM3A	0.240977	0.000528881
IL22RA1	-3.07986	7.20076e-08		CENPI	-0.425183	0.000530414
CARHSP1	-0.299492	7.22697e-08		WDR75	-0.368178	0.000530414
PSRC1	-0.471289	7.35429e-08		RNF5	0.319803	0.000533833
PRMT7	-0.3271	7.37341e-08		METTL16	-0.196398	0.000533992
FBXL7	1.06081	7.43791e-08		ATXN2	-0.200516	0.000535415
BYSL	-0.502722	7.45216e-08		CDH1	0.158908	0.000536136
2001-03-01	1.13245	7.54229e-08		ZDHHC4	0.206906	0.000537152
PCED1B	1.65373	7.61052e-08		PCCA	0.285165	0.000537736
SLC35B4	-0.354652	7.61279e-08		ARRDC3	0.351309	0.000538238
ABHD18	0.653025	7.74729e-08		DLG2	-0.542454	0.000541072
PIGZ	1.37247	7.95894e-08		GCHFR	0.514075	0.00054591
SLC38A1	0.38528	8.13805e-08		CD83	0.655661	0.000546223
CANT1	-0.270727	8.38058e-08		PRRC2C	-0.227218	0.000547279
FAF1	-0.256192	8.53222e-08		RHNO1	-0.235408	0.000549436
CRTC3	0.349056	8.56019e-08		KDM7A	0.373969	0.000551257
C1RL	0.386577	8.62021e-08		MSRB3	0.824219	0.00055126
PRAC1	0.6935	8.74857e-08		ALCAM	0.230712	0.000551534
ZNF398	-0.300762	8.76781e-08		BRD2	-0.127527	0.000551636
GNL3L	-0.273527	8.96137e-08		ATP10A	-0.286175	0.000551713
AC091179.1	0.644364	8.9859e-08		NOP56	-0.265818	0.000556822
CCDC137	-0.775973	9.18652e-08		SET	-0.196611	0.000556822
LAD1	-0.771505	9.35551e-08		IL17RC	0.335682	0.000556822
PRDM15	-0.453721	9.37712e-08		KLF10	-0.290165	0.000557444
ANAPC1	-0.368807	9.4105e-08		PTGER4	-1.00877	0.000560466
MAN1A2	0.251869	9.55805e-08		MALT1	-0.350265	0.000569627
RAF1	-0.255593	9.56086e-08		BRIP1	-0.416784	0.000577181
TMEM63C	0.474999	9.56086e-08		IGBP1	0.303404	0.000578491
TMEM106B	0.80636	9.68318e-08		CTSB	0.251159	0.000578491
C6orf48	0.463956	9.70961e-08		BCL6	0.200343	0.000579031
SATB2	0.685474	9.76225e-08		C1orf53	0.58474	0.000581655
RAB39B	1.4292	9.76225e-08		SLC30A4	0.317887	0.000584654
MRPL36	-0.553012	9.86632e-08		STXBP5L	0.306326	0.00058848
NUDT3	0.232643	9.92246e-08		NA	-0.581935	0.000590452
RIPOR2	-0.72928	1.00123e-07		TXNDC15	0.27144	0.000596229
LINC02288	2.07677	1.01754e-07		RAD18	-0.419828	0.000596969
C12orf43	-0.379301	1.02279e-07		TP53RK	-0.257508	0.000596969
BAZ2B	0.626106	1.03659e-07		P2RX4	0.333782	0.000606494
FRAS1	0.716338	1.03895e-07		AL161751.1	1.52964	0.000608166
PCCA	0.397978	1.05249e-07		EFNA3	0.468314	0.000609113
UNC5B	1.03832	1.06332e-07		SFXN3	0.274238	0.000610418
VPS41	0.388908	1.07907e-07		MAPKAPK2	0.253639	0.000610806
ZMYND12	0.850241	1.08621e-07		TDP1	-0.175649	0.000614107
REXO1	-0.503231	1.08908e-07		ZNF473	-0.26605	0.000614107
SLC16A9	0.642055	1.10804e-07		DFFA	-0.199327	0.000614107
POLG	-0.59993	1.12173e-07		MIR22HG	0.557036	0.000614107
AIDA	0.63175	1.12222e-07		EEF1A1	0.243107	0.000620863
FAAH2	0.66225	1.13211e-07		CCDC15	-0.347829	0.000620913
AXIN1	-0.544703	1.1324e-07		KCNIP3	0.663465	0.000623121
TRIM65	-0.357983	1.13424e-07		MTDH	-0.199006	0.000625106
PREPL	0.448365	1.13623e-07		RBMXL1	-0.307463	0.000626959
WBP1L	0.273474	1.13623e-07		ZBTB20	0.606836	0.000627766
SHC2	1.21828	1.15175e-07		KCNMA1	-0.189693	0.000632729
AC092902.2	1.10525	1.16149e-07		PMAIP1	0.380012	0.000634651
MEF2A	0.416589	1.17083e-07		CHEK2	-0.266127	0.000635799
RAE1	-0.348688	1.18042e-07		LINC01003	0.524259	0.000636473
IPPK	-0.313039	1.20419e-07		TFE3	0.333846	0.000637545
ACAA2	0.613913	1.223e-07		DTNB	0.236693	0.00064299
LPO	2.73408	1.22957e-07		NPM1	-0.231899	0.000645223
OIP5	-0.524755	1.23848e-07		NUDCD1	-0.428699	0.000646686
TSC1	0.265176	1.24581e-07		RTL5	0.630468	0.000646686
ERBIN	0.54159	1.25405e-07		PROM2	0.292353	0.000649033
TMEM135	0.631339	1.25882e-07		C7orf50	0.3808	0.000650903
PTPN13	0.313369	1.26242e-07		MSRB2	0.377853	0.000650903
CALML4	-0.683972	1.28748e-07		CEP295	-0.305504	0.000653416
AF117829.1	0.72108	1.2966e-07		ZC3H15	-0.308024	0.000653944
EXTL2	-0.620062	1.30447e-07		SPTLC3	0.37023	0.00066064
MSRB2	0.533942	1.30975e-07		NMD3	-0.337597	0.000663102
WWC1	-0.972844	1.31065e-07		BICDL1	0.468456	0.000666754
DECR1	0.425211	1.3413e-07		DUSP5	0.554515	0.000669414
CDK12	-0.194265	1.35547e-07		MATR3	-0.203226	0.000669459
PMS2	0.301283	1.36421e-07		GNS	0.167242	0.000669571
CDH1	0.223337	1.373e-07		RARA-AS1	0.94171	0.000673208
HAUS5	-0.522321	1.43963e-07		KLHDC9	0.489646	0.000673778
DUS1L	-0.525463	1.4482e-07		MTERF4	-0.162054	0.00068293
AC002116.2	-1.21678	1.45415e-07		PINK1	0.426637	0.000686778
ADGRV1	0.510053	1.47003e-07		GPER1	0.349903	0.000688098
NA	0.527655	1.47128e-07		CLIC1	0.369091	0.000688971
ENO2	0.754139	1.47186e-07		RPL10	0.340109	0.000692548
TOE1	-0.465762	1.4732e-07		DGLUCY	0.342183	0.000699424
SOS1	0.491467	1.48068e-07		NETO2	-0.266578	0.000702147
PUS1	-0.897835	1.48447e-07		EEF2	0.252308	0.000706622
TMEM241	-0.322704	1.4878e-07		TMED10	0.25104	0.000708289
RAB29	-0.278882	1.50788e-07		FAM120A	-0.135076	0.000710621
KLHL42	0.32256	1.50872e-07		KCNQ1	0.661191	0.000713287
WWTR1	-1.32113	1.53256e-07		RUNDC3A-AS1	0.448923	0.000717581
ADCY3	-0.417179	1.53513e-07		TAGLN2	-0.267885	0.000720579
ZFP36L2	-0.401512	1.53757e-07		GDI2	-0.217744	0.000726602
MAPRE1	-0.270574	1.54445e-07		SNTA1	0.351032	0.000729399
QSOX1	0.355189	1.633e-07		PHF8	-0.265867	0.000729399
PLA2G4E	-3.85871	1.64434e-07		OSBPL3	-0.3258	0.00073422
MIA3	0.243299	1.65525e-07		MGA	-0.203069	0.000736437
FAM167A	2.41499	1.65525e-07		SOX8	0.414124	0.000743764
NA	-0.524015	1.69116e-07		ITPR1	0.300076	0.000748644
TTBK2	0.446404	1.70216e-07		ALOX15	0.196846	0.000750449
ICK	0.318521	1.70484e-07		GLRX2	-0.604779	0.000750939
EIF2B5	-0.24655	1.71371e-07		TFB2M	-0.232474	0.000751227
FOXK1	-0.470737	1.71797e-07		FGGY	0.368718	0.000753542
BBS9	0.558908	1.74854e-07		AL357515.1	1.21368	0.00075524
PUS7	-0.32825	1.76559e-07		ESCO2	-0.490399	0.000761793
OCLNP1	1.2391	1.78106e-07		DPH2	-0.296872	0.000769098
GTF2IP4	0.683622	1.79132e-07		GLB1	0.243018	0.000769098
CENPF	-0.441494	1.80306e-07		GAS2L3	-0.448543	0.000774852
SEC22C	-0.252451	1.81649e-07		SH3BP4	0.218578	0.000775434
MBNL1	-0.372446	1.85371e-07		UTP18	-0.254838	0.000778678
ERCC4	0.360372	1.86731e-07		DNA2	-0.401264	0.000782024
GPI	-0.280323	1.87076e-07		AL021807.1	-0.452722	0.000782893
GRB14	0.653762	1.90147e-07		AC006206.2	0.745698	0.000788876
ASB13	-0.356443	1.91253e-07		DNPH1	0.490585	0.000794594
E2F4	-0.376224	1.91495e-07		RAB17	0.356505	0.000794594
RIMS4	0.840451	1.94075e-07		NANP	-0.392672	0.000794594
EIF4G1	-0.554977	1.96717e-07		FBXL7	0.747401	0.000795687
METTL7A	-0.315777	1.96717e-07		C9orf106	0.570726	0.000795761
SF3A1	-0.320407	1.99878e-07		AC105052.2	-1.0797	0.000795761
NFX1	-0.194488	2.01747e-07		PCMT1	-0.256347	0.000796662
PLOD3	-0.420836	2.07084e-07		FNDC10	0.341448	0.000796662
WNT5A	0.826809	2.07084e-07		DEK	-0.445729	0.000797745
PAQR4	-0.479466	2.09708e-07		PDIA5	-0.212111	0.000803891
SNRPF	-0.351329	2.13737e-07		CFAP298	-0.391948	0.000803891
RSPH3	0.618621	2.15592e-07		MALAT1	0.617549	0.000803922
LSG1	-0.235414	2.17149e-07		NIPAL3	0.172991	0.000809971
C1orf109	-0.321236	2.17441e-07		AMIGO1	0.419051	0.000819068
C20orf194	0.610415	2.18642e-07		SEC61A1	0.163171	0.00082365
EIF2S2	0.262765	2.20049e-07		FAM120AOS	0.197891	0.000827498
MRPL17	-0.530088	2.21111e-07		XRCC6	-0.215814	0.000830555
KSR2	0.501427	2.23255e-07		KNL1	-0.453398	0.000834671
TTI2	-0.355321	2.23485e-07		ADCY7	0.767172	0.000836616
ERLIN2	0.215739	2.24121e-07		CREB3	0.381555	0.000837925
PARD3B	0.434794	2.25004e-07		PPM1D	-0.23485	0.000837925
PTPRR	1.66911	2.27366e-07		CERS6	-0.322981	0.000837925
NA	-0.523479	2.28427e-07		LMAN2	0.30533	0.000838536
DEFB132	-0.818618	2.31502e-07		BORA	-0.609056	0.000842146
PTMA	-0.321507	2.32918e-07		CALR	0.250246	0.000842146
MAP1B	-0.496591	2.38128e-07		ZBED3	0.239151	0.000844556
NEK8	0.620193	2.38128e-07		HSD17B7	0.316381	0.00084534
PPP1R9A	0.459617	2.40867e-07		PNPT1	-0.419903	0.000852336
APOLD1	0.740822	2.40867e-07		TFPI	-0.421742	0.000854695
HTRA1	0.974913	2.41032e-07		NIF3L1	-0.284433	0.000860603
DCAKD	0.325525	2.41032e-07		CUL1	-0.190135	0.000867911
PCYT2	-0.56654	2.41032e-07		CRNKL1	-0.27052	0.00087289
SH3RF1	-0.26373	2.44215e-07		SLC35E4	0.478216	0.000875043
ZFYVE9	0.341031	2.45215e-07		DDX3X	-0.229381	0.000875043
KRCC1	0.552257	2.47707e-07		TBL1Y	0.685992	0.000877914
BROX	0.475545	2.48836e-07		TMEM63C	0.327816	0.000877914
CERK	1.54635	2.4935e-07		MYL5	0.400841	0.000877914
CLUH	-0.615466	2.49514e-07		DYRK2	-0.38521	0.000879792
AHCYL2	0.333711	2.52362e-07		MYO5B	0.33241	0.000887296
LONRF2	0.583961	2.52362e-07		AC022916.1	0.526077	0.000888703
TMEM45A	1.18683	2.52447e-07		MMP24	0.786657	0.000899499
GULP1	0.380564	2.569e-07		ALS2CL	0.760602	0.000903032
PLA2G5	-1.65524	2.57125e-07		GRAMD4	0.415043	0.000917255
TGFBRAP1	-0.279599	2.57125e-07		TMPPE	-0.276201	0.000917255
UBE3C	-0.208325	2.5871e-07		ILF3	-0.241061	0.000920248
MPP6	-0.503895	2.58782e-07		SUDS3	-0.15553	0.000923948
PTGER4	-1.40878	2.58782e-07		YRDC	-0.216905	0.000924241
WDR1	-0.321638	2.59472e-07		CAB39L	-0.262722	0.000927154
RNF208	0.61084	2.59472e-07		CHERP	-0.287813	0.000928013
PNKD	-0.379993	2.59662e-07		TUBGCP4	-0.221689	0.000936791
CYB5A	-0.400828	2.59662e-07		ZG16B	0.314747	0.000946206
RASA4CP	0.964639	2.59662e-07		LRRC31	1.20471	0.000946455
USP40	0.294005	2.60943e-07		TMEM59	0.253689	0.000946929
KIAA1841	0.648709	2.65652e-07		UBE2G1	-0.298418	0.000947477
FOXN4	1.77588	2.70251e-07		TRIAP1	-0.321538	0.00094976
CCDC83	1.29248	2.71835e-07		ZNF514	0.359126	0.000951032
NDUFB4	0.411788	2.77877e-07		HSP90AA2P	-0.625142	0.000951032
CDON	0.415295	2.79474e-07		NEIL3	-0.444305	0.00095235
MYNN	0.547663	2.83502e-07		PAOX	0.690311	0.000955237
FBXO45	-0.422002	2.83678e-07		ARSA	0.436901	0.000959474
GHITM	0.34373	2.83974e-07		CD3EAP	-0.470477	0.0009682
C1orf35	-0.680185	2.86119e-07		CCDC34	-0.335884	0.000969599
GNPTAB	0.346556	2.8873e-07		TMEM179B	0.326733	0.000971133
TET2	0.362818	2.89768e-07		LLGL2	0.357815	0.000980265
MAP3K13	0.36234	2.89837e-07		AL139246.5	0.598181	0.000980321
GTF3C4	-0.34743	2.94752e-07		LIMD1	-0.16005	0.000984663
IQCN	0.606837	2.98686e-07		MIR3189	1.32237	0.000987199
KIF5B	0.353912	2.99925e-07		PROSER1	-0.223486	0.000987611
TELO2	-0.753663	3.01768e-07		AC091179.1	0.446961	0.000993308
RAB35	-0.363312	3.04271e-07		CTSC	-0.569085	0.00099353
F11R	0.292373	3.07988e-07		SMARCA5	-0.23357	0.000994345
ZNF454	0.583018	3.08344e-07		NUFIP1	-0.314683	0.00100397
CSRP1	0.357009	3.08466e-07		DONSON	-0.388517	0.00101066
SCYL3	0.46026	3.11192e-07		SIPA1	0.403993	0.00101758
HNRNPLL	0.350732	3.13924e-07		TMEM129	0.300719	0.00101879
SPDL1	-0.478446	3.15403e-07		MPHOSPH10	-0.368952	0.00102347
LAT2	-2.22801	3.16386e-07		PTTG1IP	0.218547	0.00102636
ZNF462	0.322202	3.21077e-07		KPNA6	-0.159125	0.00102719
DDX12P	-0.825039	3.21374e-07		FAM72A	-0.720821	0.00102719
GPR63	0.457076	3.22424e-07		TNFRSF1A	0.256933	0.00102842
ETFA	0.249312	3.26589e-07		C1orf112	-0.323791	0.00103908
KNTC1	-0.528988	3.28057e-07		ZNF614	-0.300561	0.00104166
IER5L	0.900925	3.28787e-07		MRTO4	-0.258275	0.00104298
CCND3	-0.399577	3.29634e-07		CCNDBP1	0.293505	0.0010445
PPIH	-0.437168	3.32999e-07		TSPAN3	0.229616	0.0010462
CASTOR3	0.708297	3.37278e-07		LPCAT4	0.358259	0.00105234
GNAZ	0.389538	3.4119e-07		VPS51	0.312816	0.00105857
ARNT	0.249646	3.44267e-07		DACT3	0.865685	0.00105857
CKAP4	-0.257447	3.4446e-07		NDST1	-0.170443	0.00105879
PACS1	-0.399798	3.47523e-07		LRP1	0.48901	0.00105879
TXNDC15	0.369855	3.49935e-07		ZNF749	-0.263513	0.0010912
CCT2	-0.290293	3.51791e-07		BBS2	0.230822	0.00109318
PDGFA	0.644381	3.51916e-07		EI24	-0.175189	0.00109318
PCSK7	-0.419997	3.52935e-07		TCIM	1.43059	0.00109318
BMPR1A	-0.328081	3.62092e-07		FH	-0.237548	0.00109429
SCAI	0.579044	3.64341e-07		SEZ6L2	0.262876	0.00109436
FANCD2	-0.295399	3.64864e-07		CDC25C	-0.304953	0.00109441
GBF1	-0.28245	3.73596e-07		ZNF551	-0.226135	0.00109909
ARSD	0.342944	3.75369e-07		ZNF726	-0.291024	0.00109909
SLC27A4	-0.516924	3.82494e-07		VWA5A	0.644971	0.0011019
RBL1	-0.457704	3.84887e-07		YARS2	-0.225188	0.00110974
TBL1Y	0.935225	3.87305e-07		PCMTD1	0.393097	0.00111416
TRAK1	-0.254043	3.98535e-07		U2AF1	-0.180026	0.0011155
PTPRG	0.397112	3.99109e-07		NOL10	-0.257247	0.00111904
PDHA1	-0.251008	4.0243e-07		TYW3	-0.300452	0.00111916
FAM222A	-0.508809	4.0243e-07		HEXDC	0.412556	0.00112315
TBL3	-0.533152	4.04258e-07		CALML4	-0.461015	0.00112442
PVR	-0.394214	4.09597e-07		B9D1	0.471391	0.00113015
COPS3	-0.362423	4.11372e-07		RECQL	-0.369392	0.00114643
SCNN1G	1.4351	4.14225e-07		NXF1	-0.217724	0.00115068
MCFD2	0.308867	4.1626e-07		ZIK1	-0.209272	0.00115925
FASTKD5	-0.302563	4.19196e-07		SLC25A44	-0.181244	0.00116265
GPR155	0.768688	4.19416e-07		RNF26	-0.226049	0.00116933
SENP3	-0.502957	4.28412e-07		RNF24	0.206534	0.00117414
TRIM16	0.331931	4.29582e-07		CHSY1	-0.192694	0.00117414
ELP5	-0.37608	4.33081e-07		ASNSD1	-0.418856	0.00117414
ARL15	0.71915	4.35302e-07		NVL	-0.152743	0.00117414
CDC20P1	-0.797163	4.3936e-07		SLC26A2	-0.405617	0.00117414
MGC27382	-2.46427	4.39639e-07		UAP1L1	0.388807	0.00117464
NUDT15	-0.439631	4.43741e-07		CEP83	-0.385526	0.00117726
TOPBP1	-0.360597	4.57627e-07		THAP8	0.532163	0.00119958
TUBA3E	-3.06834	4.67524e-07		PSMC6	-0.223967	0.00120031
KRT80	1.09355	4.67524e-07		PTRH2	-0.232018	0.00120031
CDCA3	-0.50834	4.79816e-07		LPCAT3	0.199322	0.00120078
POLR1A	-0.479451	4.83845e-07		SCLY	-0.471949	0.00122183
PELP1	-0.612542	4.99309e-07		GABRA3	0.420766	0.00122312
PHF12	0.294855	5.02258e-07		TWISTNB	-0.397608	0.00122357
ZBTB38	0.318171	5.12034e-07		MRPS9	-0.203096	0.00122488
RBM15	-0.281064	5.32364e-07		EPHB2	0.336104	0.00122728
DTYMK	-0.46272	5.33566e-07		PRMT2	0.249345	0.00122728
ENTPD5	0.26129	5.35514e-07		ADAM28	-1.37221	0.00122883
ARHGEF39	-0.426644	5.42193e-07		ATF6B	0.411044	0.00123001
TRMT6	-0.387895	5.45901e-07		KBTBD6	-0.193533	0.00123922
CTSH	0.415694	5.55319e-07		HINT2	0.359953	0.0012395
AL691432.2	0.514353	5.60109e-07		PCSK6	0.212754	0.00124815
NOL4L	0.430966	5.66543e-07		NAA15	-0.415323	0.00124988
TEX30	-0.577839	5.67458e-07		YWHAG	-0.191125	0.00124988
TMPPE	-0.382138	5.67458e-07		ZNF217	0.167798	0.00124988
AC100768.2	0.8541	5.67458e-07		C8orf59	-0.434128	0.00124988
PAFAH1B1	0.29145	5.68302e-07		TMEM63A	0.267405	0.00124988
TMC4	0.457111	5.78902e-07		PGLS	0.380814	0.00125202
SETD6	-0.426472	5.79766e-07		RAB40B	0.312275	0.00125844
ALB	0.752991	5.79766e-07		LDLRAD3	-0.243227	0.00126
IL1R1	-0.320314	5.80858e-07		HAT1	-0.537954	0.00126231
CDH24	0.502114	5.81898e-07		FUT3	1.02029	0.00126231
ELMSAN1	-0.509579	5.8711e-07		BRD4	-0.235412	0.00127079
C9orf40	-0.506356	5.88679e-07		AC006504.1	0.518348	0.00127549
RAVER1	-0.443228	5.93183e-07		CCNI	0.245869	0.00127631
LAS1L	-0.677297	5.93628e-07		FUT11	-0.302589	0.00129079
SEZ6L2	0.368341	6.0031e-07		MAML1	-0.181341	0.00129754
FAM114A1	0.219728	6.0031e-07		TSC1	0.179032	0.00131404
ZNF552	-0.361799	6.05675e-07		RBM33	-0.181031	0.00131996
TJP1	-0.183211	6.06747e-07		CSTF2	-0.258051	0.00132826
NHS	1.85834	6.13045e-07		SPC24	-0.227928	0.00133001
BDH1	-0.291295	6.18673e-07		CRELD1	0.293644	0.00133432
PRDX5	0.589787	6.24197e-07		KLHL15	-0.360934	0.00133777
RIT1	0.446411	6.24807e-07		FAAH2	0.449981	0.00133841
PRSS23	1.24967	6.2515e-07		CDC5L	-0.203685	0.00134438
SHMT1	-0.277362	6.27358e-07		KCTD3	-0.200676	0.00134874
ZNF580	0.599816	6.27358e-07		CEBPZ	-0.365844	0.00135237
UBQLN4	-0.262615	6.29873e-07		ARHGAP29	0.443036	0.00135275
HIVEP2	0.317768	6.4617e-07		SPEN	-0.264098	0.00135504
RRS1	-0.831457	6.66439e-07		FAF1	-0.168985	0.00135504
CEP295	-0.412784	6.73177e-07		POMK	-0.199505	0.00136156
SLC10A5	1.04675	6.7975e-07		DENND6B	0.49475	0.00136884
SLC25A28	-0.533037	6.89642e-07		SLC33A1	0.204728	0.00137237
C17orf53	-0.627951	6.92514e-07		MOV10L1	1.76446	0.00137443
ZNF485	-0.447982	6.92714e-07		SNRPG	-0.355434	0.00137443
BCAS3	0.45991	6.95384e-07		PIGZ	0.927243	0.0013775
WAC-AS1	0.430392	6.95623e-07		NARS2	-0.226641	0.00138133
C12orf76	0.478433	6.97286e-07		GSTK1	0.321155	0.00138133
DOCK8	-2.34676	6.99433e-07		RNF215	0.359548	0.00138228
INTS5	-0.369386	7.03324e-07		RIF1	-0.472321	0.00138975
IL17RC	0.444128	7.03837e-07		TRIM25	0.164167	0.00139265
CENPW	-0.447415	7.03916e-07		AF117829.1	0.488846	0.00139698
MRPL4	-0.477863	7.04058e-07		PPAT	-0.308216	0.00140082
ARHGAP9	1.92368	7.05016e-07		ABHD17C	-0.369085	0.00140082
SIRT2	0.35339	7.08354e-07		SLC4A7	-0.363492	0.00140472
CCAR2	-0.383913	7.08354e-07		TFAP4	-0.270013	0.00141017
CHP1	0.22516	7.08354e-07		RAB25	0.351609	0.00141891
FAM117A	0.497437	7.1445e-07		PARP12	0.2781	0.00142317
EFNB3	1.14785	7.20952e-07		ARHGEF17	0.315009	0.00142341
NOX5	-0.897081	7.38885e-07		NBEA	0.439827	0.00142614
CREB3L4	-0.36338	7.43417e-07		PHTF2	-0.412587	0.00142968
PRUNE2	0.23452	7.5032e-07		CHUK	-0.29498	0.00142995
HES1	-0.643709	7.59557e-07		SPINT1-AS1	0.488197	0.00143967
STOX1	0.735065	7.63197e-07		MAFB	0.151015	0.00144105
FAM184B	1.2784	7.70933e-07		PUS7	-0.220271	0.00144511
OPA3	-0.433342	7.73479e-07		CIAO2A	-0.272219	0.00144511
ZNF561-AS1	0.488903	7.82576e-07		MAN2B1	0.262472	0.00144562
PRNP	0.245256	7.89454e-07		HELLS	-0.504144	0.00145055
BCL2L12	-0.519415	7.91455e-07		TMX4	-0.232352	0.00146229
CD320	-0.480915	7.9928e-07		MRPL47	-0.252815	0.001463
TSC22D1	0.212718	7.9954e-07		RAE1	-0.230563	0.00146509
MDN1	-0.577432	8.39441e-07		AC103974.1	2.96359	0.00146528
RPP30	-0.402293	8.71733e-07		GNAI1	-0.282443	0.00146532
SAMD13	0.498667	8.72471e-07		PIGK	-0.361913	0.00147901
AGPAT5	-0.458411	8.86055e-07		CBS	0.40262	0.00151385
CYP1A1	1.16011	8.92357e-07		PLEKHH1	0.224177	0.00151419
MAPK4	0.80604	8.97494e-07		HAX1	0.334039	0.00151528
TSKU	-0.33384	9.10947e-07		LRRC8D	0.33415	0.00152366
DFFB	-0.420896	9.22663e-07		CSRNP1	0.270298	0.00153326
SMAD6	-0.498598	9.34176e-07		EIF4E3	0.387287	0.00154023
POLR3G	-0.491099	9.39169e-07		POLR3G	-0.3485	0.00154056
SHTN1	0.328734	9.51843e-07		NA	-0.427174	0.0015475
PDE6D	0.552368	9.62485e-07		GNAI3	-0.289851	0.0015489
SETD1A	-0.516032	9.66485e-07		SF3A1	-0.21359	0.00155047
GSPT1	-0.254959	9.70669e-07		BLOC1S6	0.287303	0.00155097
MORC3	0.517465	9.72973e-07		GRWD1	-0.243045	0.00155097
FER1L6	1.53484	9.7595e-07		TYMP	0.682649	0.00155342
RNF217	1.01549	9.7925e-07		RNF217	0.736037	0.00156687
MAJIN	1.40473	9.79405e-07		PPP6R3	-0.219557	0.00157057
LINC00957	0.620381	9.79547e-07		MAP3K14-AS1	0.477415	0.001589
ALDOC	0.388145	9.86763e-07		WDR55	-0.165255	0.00159176
MTCH2	-0.281167	9.90365e-07		PRR14L	-0.175497	0.00159186
[truncated: 55,862 more rows]

## Sheet: F6E
Pathway	P-adjusted	NES	Contrast
HALLMARK_INFLAMMATORY_RESPONSE	0.00464793	1.55999	DE_24h_1ae_5uM_vsDMSO
HALLMARK_HEME_METABOLISM	0.159177	1.3243	DE_24h_1ae_5uM_vsDMSO
HALLMARK_COAGULATION	0.21636	1.29082	DE_24h_1ae_5uM_vsDMSO
HALLMARK_ALLOGRAFT_REJECTION	0.21636	1.27718	DE_24h_1ae_5uM_vsDMSO
HALLMARK_XENOBIOTIC_METABOLISM	0.568006	1.10019	DE_24h_1ae_5uM_vsDMSO
HALLMARK_COMPLEMENT	0.574967	1.09404	DE_24h_1ae_5uM_vsDMSO
HALLMARK_APOPTOSIS	0.600205	1.07459	DE_24h_1ae_5uM_vsDMSO
HALLMARK_UV_RESPONSE_UP	0.948142	0.961172	DE_24h_1ae_5uM_vsDMSO
HALLMARK_SPERMATOGENESIS	0.948142	0.925742	DE_24h_1ae_5uM_vsDMSO
HALLMARK_HEDGEHOG_SIGNALING	0.948142	0.901014	DE_24h_1ae_5uM_vsDMSO
HALLMARK_P53_PATHWAY	0.948142	0.870093	DE_24h_1ae_5uM_vsDMSO
HALLMARK_NOTCH_SIGNALING	0.948142	-0.840091	DE_24h_1ae_5uM_vsDMSO
HALLMARK_FATTY_ACID_METABOLISM	0.948142	-0.881722	DE_24h_1ae_5uM_vsDMSO
HALLMARK_OXIDATIVE_PHOSPHORYLATION	0.282486	-1.19587	DE_24h_1ae_5uM_vsDMSO
HALLMARK_MITOTIC_SPINDLE	0.0784095	-1.3265	DE_24h_1ae_5uM_vsDMSO
HALLMARK_G2M_CHECKPOINT	1.56827e-08	-1.98931	DE_24h_1ae_5uM_vsDMSO
HALLMARK_ANDROGEN_RESPONSE	3.87985e-08	-2.13114	DE_24h_1ae_5uM_vsDMSO
HALLMARK_MYC_TARGETS_V2	1.33172e-07	-2.17807	DE_24h_1ae_5uM_vsDMSO
HALLMARK_MYC_TARGETS_V1	6.86425e-13	-2.18714	DE_24h_1ae_5uM_vsDMSO
HALLMARK_E2F_TARGETS	6.02421e-22	-2.53174	DE_24h_1ae_5uM_vsDMSO
HALLMARK_INFLAMMATORY_RESPONSE	0.0438119	1.40809	DE_24h_EPI_25uM_vsDMSO
HALLMARK_ALLOGRAFT_REJECTION	0.0539995	1.39719	DE_24h_EPI_25uM_vsDMSO
HALLMARK_COAGULATION	0.123355	1.36684	DE_24h_EPI_25uM_vsDMSO
HALLMARK_APOPTOSIS	0.304709	1.26939	DE_24h_EPI_25uM_vsDMSO
HALLMARK_HEDGEHOG_SIGNALING	0.435268	1.26409	DE_24h_EPI_25uM_vsDMSO
HALLMARK_P53_PATHWAY	0.304709	1.24016	DE_24h_EPI_25uM_vsDMSO
HALLMARK_HEME_METABOLISM	0.316536	1.22697	DE_24h_EPI_25uM_vsDMSO
HALLMARK_UV_RESPONSE_UP	0.435268	1.18864	DE_24h_EPI_25uM_vsDMSO
HALLMARK_XENOBIOTIC_METABOLISM	0.435268	1.16633	DE_24h_EPI_25uM_vsDMSO
HALLMARK_COMPLEMENT	0.435268	1.16048	DE_24h_EPI_25uM_vsDMSO
HALLMARK_NOTCH_SIGNALING	1	-0.827644	DE_24h_EPI_25uM_vsDMSO
HALLMARK_FATTY_ACID_METABOLISM	0.993903	-0.92586	DE_24h_EPI_25uM_vsDMSO
HALLMARK_OXIDATIVE_PHOSPHORYLATION	0.839286	-0.974192	DE_24h_EPI_25uM_vsDMSO
HALLMARK_SPERMATOGENESIS	0.734044	-1.02289	DE_24h_EPI_25uM_vsDMSO
HALLMARK_MITOTIC_SPINDLE	0.435268	-1.11332	DE_24h_EPI_25uM_vsDMSO
HALLMARK_MYC_TARGETS_V2	0.000469705	-1.85189	DE_24h_EPI_25uM_vsDMSO
HALLMARK_ANDROGEN_RESPONSE	4.22441e-05	-1.87682	DE_24h_EPI_25uM_vsDMSO
HALLMARK_G2M_CHECKPOINT	8.1699e-08	-1.91911	DE_24h_EPI_25uM_vsDMSO
HALLMARK_MYC_TARGETS_V1	4.4056e-08	-1.94712	DE_24h_EPI_25uM_vsDMSO
HALLMARK_E2F_TARGETS	1.58586e-15	-2.29975	DE_24h_EPI_25uM_vsDMSO
HALLMARK_INFLAMMATORY_RESPONSE	0.717132	1.25994	DE_24h_1ae_0p5uM_vsDMSO
HALLMARK_HEME_METABOLISM	1	1.1253	DE_24h_1ae_0p5uM_vsDMSO
HALLMARK_ALLOGRAFT_REJECTION	1	1.01807	DE_24h_1ae_0p5uM_vsDMSO
HALLMARK_APOPTOSIS	1	0.943022	DE_24h_1ae_0p5uM_vsDMSO
HALLMARK_COAGULATION	1	0.934555	DE_24h_1ae_0p5uM_vsDMSO
HALLMARK_XENOBIOTIC_METABOLISM	1	0.857915	DE_24h_1ae_0p5uM_vsDMSO
HALLMARK_HEDGEHOG_SIGNALING	1	0.852365	DE_24h_1ae_0p5uM_vsDMSO
HALLMARK_UV_RESPONSE_UP	1	0.780211	DE_24h_1ae_0p5uM_vsDMSO
HALLMARK_NOTCH_SIGNALING	1	0.780011	DE_24h_1ae_0p5uM_vsDMSO
HALLMARK_MYC_TARGETS_V1	1	0.692834	DE_24h_1ae_0p5uM_vsDMSO
HALLMARK_OXIDATIVE_PHOSPHORYLATION	1	0.630882	DE_24h_1ae_0p5uM_vsDMSO
HALLMARK_P53_PATHWAY	1	0.567985	DE_24h_1ae_0p5uM_vsDMSO
HALLMARK_G2M_CHECKPOINT	1	0.553477	DE_24h_1ae_0p5uM_vsDMSO
HALLMARK_E2F_TARGETS	1	0.550516	DE_24h_1ae_0p5uM_vsDMSO
HALLMARK_FATTY_ACID_METABOLISM	1	-0.647683	DE_24h_1ae_0p5uM_vsDMSO
HALLMARK_MYC_TARGETS_V2	1	-0.839397	DE_24h_1ae_0p5uM_vsDMSO
HALLMARK_MITOTIC_SPINDLE	1	-0.841896	DE_24h_1ae_0p5uM_vsDMSO
HALLMARK_SPERMATOGENESIS	1	-0.879743	DE_24h_1ae_0p5uM_vsDMSO
HALLMARK_COMPLEMENT	1	-0.942666	DE_24h_1ae_0p5uM_vsDMSO
HALLMARK_ANDROGEN_RESPONSE	0.00499337	-1.67393	DE_24h_1ae_0p5uM_vsDMSO
HALLMARK_SPERMATOGENESIS	1	1.11983	DE_24h_EPI_2p5uM_vsDMSO
HALLMARK_ALLOGRAFT_REJECTION	1	1.11496	DE_24h_EPI_2p5uM_vsDMSO
HALLMARK_UV_RESPONSE_UP	1	1.008	DE_24h_EPI_2p5uM_vsDMSO
HALLMARK_HEME_METABOLISM	1	0.984624	DE_24h_EPI_2p5uM_vsDMSO
HALLMARK_XENOBIOTIC_METABOLISM	1	0.947495	DE_24h_EPI_2p5uM_vsDMSO
HALLMARK_MYC_TARGETS_V1	1	0.653744	DE_24h_EPI_2p5uM_vsDMSO
HALLMARK_OXIDATIVE_PHOSPHORYLATION	1	0.636786	DE_24h_EPI_2p5uM_vsDMSO
HALLMARK_G2M_CHECKPOINT	1	0.560826	DE_24h_EPI_2p5uM_vsDMSO
HALLMARK_E2F_TARGETS	1	0.531584	DE_24h_EPI_2p5uM_vsDMSO
HALLMARK_MYC_TARGETS_V2	1	0.422397	DE_24h_EPI_2p5uM_vsDMSO
HALLMARK_MITOTIC_SPINDLE	1	-0.387788	DE_24h_EPI_2p5uM_vsDMSO
HALLMARK_NOTCH_SIGNALING	1	-0.633983	DE_24h_EPI_2p5uM_vsDMSO
HALLMARK_P53_PATHWAY	1	-0.726492	DE_24h_EPI_2p5uM_vsDMSO
HALLMARK_FATTY_ACID_METABOLISM	1	-0.764966	DE_24h_EPI_2p5uM_vsDMSO
HALLMARK_HEDGEHOG_SIGNALING	1	-0.793819	DE_24h_EPI_2p5uM_vsDMSO
HALLMARK_INFLAMMATORY_RESPONSE	1	-0.848269	DE_24h_EPI_2p5uM_vsDMSO
HALLMARK_COMPLEMENT	1	-0.856497	DE_24h_EPI_2p5uM_vsDMSO
HALLMARK_COAGULATION	1	-0.87909	DE_24h_EPI_2p5uM_vsDMSO
HALLMARK_APOPTOSIS	1	-0.927726	DE_24h_EPI_2p5uM_vsDMSO
HALLMARK_ANDROGEN_RESPONSE	1	-1.04966	DE_24h_EPI_2p5uM_vsDMSO
HALLMARK_P53_PATHWAY	1	0.759295	DE_6h_1ae_5uM_vsDMSO
HALLMARK_MITOTIC_SPINDLE	1	-0.518137	DE_6h_1ae_5uM_vsDMSO
HALLMARK_OXIDATIVE_PHOSPHORYLATION	1	-0.567095	DE_6h_1ae_5uM_vsDMSO
HALLMARK_HEME_METABOLISM	1	-0.60571	DE_6h_1ae_5uM_vsDMSO
HALLMARK_UV_RESPONSE_UP	1	-0.694727	DE_6h_1ae_5uM_vsDMSO
HALLMARK_G2M_CHECKPOINT	1	-0.722249	DE_6h_1ae_5uM_vsDMSO
HALLMARK_FATTY_ACID_METABOLISM	1	-0.795263	DE_6h_1ae_5uM_vsDMSO
HALLMARK_MYC_TARGETS_V1	1	-0.811993	DE_6h_1ae_5uM_vsDMSO
HALLMARK_XENOBIOTIC_METABOLISM	1	-0.869885	DE_6h_1ae_5uM_vsDMSO
HALLMARK_APOPTOSIS	1	-0.877066	DE_6h_1ae_5uM_vsDMSO
HALLMARK_E2F_TARGETS	1	-0.902411	DE_6h_1ae_5uM_vsDMSO
HALLMARK_NOTCH_SIGNALING	1	-0.910647	DE_6h_1ae_5uM_vsDMSO
HALLMARK_COMPLEMENT	1	-1.02423	DE_6h_1ae_5uM_vsDMSO
HALLMARK_INFLAMMATORY_RESPONSE	0.919757	-1.0849	DE_6h_1ae_5uM_vsDMSO
HALLMARK_COAGULATION	0.837515	-1.11603	DE_6h_1ae_5uM_vsDMSO
HALLMARK_HEDGEHOG_SIGNALING	0.919757	-1.12745	DE_6h_1ae_5uM_vsDMSO
HALLMARK_ANDROGEN_RESPONSE	0.596491	-1.19235	DE_6h_1ae_5uM_vsDMSO
HALLMARK_ALLOGRAFT_REJECTION	0.468133	-1.19254	DE_6h_1ae_5uM_vsDMSO
HALLMARK_SPERMATOGENESIS	0.5	-1.20592	DE_6h_1ae_5uM_vsDMSO
HALLMARK_MYC_TARGETS_V2	0.670354	-1.20638	DE_6h_1ae_5uM_vsDMSO
HALLMARK_P53_PATHWAY	1	0.924783	DE_6h_EPI_25uM_vsDMSO
HALLMARK_HEME_METABOLISM	1	0.834533	DE_6h_EPI_25uM_vsDMSO
HALLMARK_ANDROGEN_RESPONSE	1	0.583479	DE_6h_EPI_25uM_vsDMSO
HALLMARK_OXIDATIVE_PHOSPHORYLATION	1	-0.397296	DE_6h_EPI_25uM_vsDMSO
HALLMARK_MYC_TARGETS_V1	1	-0.616123	DE_6h_EPI_25uM_vsDMSO
HALLMARK_G2M_CHECKPOINT	1	-0.641497	DE_6h_EPI_25uM_vsDMSO
HALLMARK_MITOTIC_SPINDLE	1	-0.655695	DE_6h_EPI_25uM_vsDMSO
HALLMARK_FATTY_ACID_METABOLISM	1	-0.714092	DE_6h_EPI_25uM_vsDMSO
HALLMARK_UV_RESPONSE_UP	1	-0.723403	DE_6h_EPI_25uM_vsDMSO
HALLMARK_HEDGEHOG_SIGNALING	1	-0.895972	DE_6h_EPI_25uM_vsDMSO
HALLMARK_APOPTOSIS	1	-0.896905	DE_6h_EPI_25uM_vsDMSO
HALLMARK_E2F_TARGETS	1	-0.962453	DE_6h_EPI_25uM_vsDMSO
HALLMARK_XENOBIOTIC_METABOLISM	0.95618	-1.01256	DE_6h_EPI_25uM_vsDMSO
HALLMARK_COMPLEMENT	0.939786	-1.03479	DE_6h_EPI_25uM_vsDMSO
HALLMARK_NOTCH_SIGNALING	0.80032	-1.12384	DE_6h_EPI_25uM_vsDMSO
HALLMARK_INFLAMMATORY_RESPONSE	0.441778	-1.16625	DE_6h_EPI_25uM_vsDMSO
HALLMARK_MYC_TARGETS_V2	0.441778	-1.26203	DE_6h_EPI_25uM_vsDMSO
HALLMARK_ALLOGRAFT_REJECTION	0.176664	-1.28283	DE_6h_EPI_25uM_vsDMSO
HALLMARK_COAGULATION	0.176664	-1.30089	DE_6h_EPI_25uM_vsDMSO
HALLMARK_SPERMATOGENESIS	0.0657998	-1.3941	DE_6h_EPI_25uM_vsDMSO
HALLMARK_MYC_TARGETS_V2	1	0.858005	DE_6h_1ae_0p5uM_vsDMSO
HALLMARK_G2M_CHECKPOINT	1	-0.40221	DE_6h_1ae_0p5uM_vsDMSO
HALLMARK_MITOTIC_SPINDLE	1	-0.684109	DE_6h_1ae_0p5uM_vsDMSO
HALLMARK_P53_PATHWAY	1	-0.73967	DE_6h_1ae_0p5uM_vsDMSO
HALLMARK_HEDGEHOG_SIGNALING	1	-0.751919	DE_6h_1ae_0p5uM_vsDMSO
HALLMARK_UV_RESPONSE_UP	1	-0.758256	DE_6h_1ae_0p5uM_vsDMSO
HALLMARK_FATTY_ACID_METABOLISM	1	-0.830755	DE_6h_1ae_0p5uM_vsDMSO
HALLMARK_OXIDATIVE_PHOSPHORYLATION	1	-0.869554	DE_6h_1ae_0p5uM_vsDMSO
HALLMARK_HEME_METABOLISM	1	-0.933116	DE_6h_1ae_0p5uM_vsDMSO
HALLMARK_ANDROGEN_RESPONSE	0.757328	-1.0418	DE_6h_1ae_0p5uM_vsDMSO
HALLMARK_XENOBIOTIC_METABOLISM	0.316467	-1.15426	DE_6h_1ae_0p5uM_vsDMSO
HALLMARK_NOTCH_SIGNALING	0.543628	-1.1547	DE_6h_1ae_0p5uM_vsDMSO
HALLMARK_COAGULATION	0.375314	-1.16481	DE_6h_1ae_0p5uM_vsDMSO
HALLMARK_COMPLEMENT	0.267538	-1.16916	DE_6h_1ae_0p5uM_vsDMSO
HALLMARK_SPERMATOGENESIS	0.28708	-1.18733	DE_6h_1ae_0p5uM_vsDMSO
HALLMARK_ALLOGRAFT_REJECTION	0.267538	-1.18754	DE_6h_1ae_0p5uM_vsDMSO
HALLMARK_INFLAMMATORY_RESPONSE	0.267538	-1.18952	DE_6h_1ae_0p5uM_vsDMSO
HALLMARK_APOPTOSIS	0.174197	-1.27787	DE_6h_1ae_0p5uM_vsDMSO
HALLMARK_E2F_TARGETS	NA	NA	DE_6h_1ae_0p5uM_vsDMSO
HALLMARK_MYC_TARGETS_V1	NA	NA	DE_6h_1ae_0p5uM_vsDMSO
HALLMARK_MYC_TARGETS_V2	0.690856	1.14862	DE_6h_EPI_2p5uM_vsDMSO
HALLMARK_ANDROGEN_RESPONSE	1	0.590034	DE_6h_EPI_2p5uM_vsDMSO
HALLMARK_G2M_CHECKPOINT	1	-0.401287	DE_6h_EPI_2p5uM_vsDMSO
HALLMARK_P53_PATHWAY	1	-0.607053	DE_6h_EPI_2p5uM_vsDMSO
HALLMARK_MITOTIC_SPINDLE	1	-0.635516	DE_6h_EPI_2p5uM_vsDMSO
HALLMARK_HEME_METABOLISM	1	-0.765698	DE_6h_EPI_2p5uM_vsDMSO
HALLMARK_NOTCH_SIGNALING	1	-0.788257	DE_6h_EPI_2p5uM_vsDMSO
HALLMARK_OXIDATIVE_PHOSPHORYLATION	1	-0.798813	DE_6h_EPI_2p5uM_vsDMSO
HALLMARK_FATTY_ACID_METABOLISM	1	-0.923549	DE_6h_EPI_2p5uM_vsDMSO
HALLMARK_XENOBIOTIC_METABOLISM	0.907782	-1.0087	DE_6h_EPI_2p5uM_vsDMSO
HALLMARK_UV_RESPONSE_UP	0.907782	-1.00976	DE_6h_EPI_2p5uM_vsDMSO
HALLMARK_INFLAMMATORY_RESPONSE	0.735882	-1.07329	DE_6h_EPI_2p5uM_vsDMSO
HALLMARK_ALLOGRAFT_REJECTION	0.735882	-1.08114	DE_6h_EPI_2p5uM_vsDMSO
HALLMARK_COMPLEMENT	0.690856	-1.13367	DE_6h_EPI_2p5uM_vsDMSO
HALLMARK_HEDGEHOG_SIGNALING	0.723779	-1.14037	DE_6h_EPI_2p5uM_vsDMSO
HALLMARK_SPERMATOGENESIS	0.690856	-1.15589	DE_6h_EPI_2p5uM_vsDMSO
HALLMARK_APOPTOSIS	0.690856	-1.16486	DE_6h_EPI_2p5uM_vsDMSO
HALLMARK_COAGULATION	0.630321	-1.197	DE_6h_EPI_2p5uM_vsDMSO
HALLMARK_E2F_TARGETS	NA	NA	DE_6h_EPI_2p5uM_vsDMSO
HALLMARK_MYC_TARGETS_V1	NA	NA	DE_6h_EPI_2p5uM_vsDMSO

## Sheet: F6F
Gene	ANDROGEN_RESPONSE	INFLAMMATORY_RESPONSE	SPERMATOGENESIS	P53_PATHWAY	EPI_NEG_DEG	24hr_DMSO_Rep1	24hr_EPI_2.5_Rep1	24hr_EPI_25_Rep1	24hr_1ae_0.5_Rep1	24hr_1ae_5_Rep1	24hr_DMSO_Rep2	24hr_EPI_2.5_Rep2	24hr_EPI_25_Rep2	24hr_1ae_0.5_Rep2	24hr_1ae_5_Rep2	24hr_DMSO_Rep3	24hr_EPI_2.5_Rep3	24hr_EPI_25_Rep3	24hr_1ae_0.5_Rep3	24hr_1ae_5_Rep3
CFTR	no	no	yes	no	no	0.317549	0.434416	-0.600624	0.725366	0.0033146	0.393483	0.377462	0.655506	-0.0360459	1.01631	0.799234	-0.719645	-0.613793	0.247769	-1.70307
SLC7A2	no	yes	no	no	no	1.78815	1.33298	-1.55437	1.22297	0.755974	1.85432	0.85853	1.00783	0.862806	-1.70629	0.18399	0.475678	-1.14184	0.0704765	-0.0763118
YBX2	no	no	yes	no	no	-1.53931	0.743951	-0.785933	-1.52233	-0.343438	-0.673202	0.454134	-0.458554	-0.42475	0.693832	2.00179	1.03554	0.66719	-0.142847	-0.648971
CX3CL1	no	yes	no	no	no	-0.296651	-0.296651	-0.296651	-0.296651	-0.296651	-0.296651	-0.296651	-0.296651	-0.296651	-0.296651	1.55932	-0.296651	-0.296651	-0.296651	-0.296651
DBF4	no	no	yes	no	no	1.41038	1.40611	-0.580472	1.55638	0.357199	1.72617	1.51319	-0.0207832	1.66749	-1.17134	1.10042	0.893478	-1.17882	0.810177	0.403418
TKTL1	no	no	yes	no	no	0.272369	0.422311	-0.081086	-1.19501	-0.136775	0.102124	-0.603904	0.703174	2.24603	-0.658026	0.536474	0.958855	-0.636959	-0.38066	-1.60939
SELE	no	yes	no	no	no	-0.898972	1.7142	1.23892	-0.898972	1.18716	0.112553	-0.898972	1.56585	-0.898972	0.0678806	0.20237	-0.898972	-0.898972	0.245576	0.896704
PHF7	no	no	yes	no	no	0.634731	0.668888	-0.518669	-0.234408	-1.55485	0.281909	0.846621	-0.799372	-0.0527506	0.528091	0.821964	0.957159	0.120215	1.46363	-0.754212
STAB1	no	yes	no	no	no	-1.40935	-0.236704	-0.375454	-1.2078	-0.673647	-0.59619	-0.628333	0.571501	-1.22391	0.685466	0.633176	-1.16058	-0.41458	-0.0736947	-0.834847
PLAUR	no	yes	no	no	no	0.537187	0.399906	0.689824	-0.479991	-2.24213	1.12961	0.480224	-0.32615	1.29916	0.464683	1.08015	-0.143804	0.50853	-1.23434	-0.779292
ELOVL5	yes	no	no	no	no	1.2784	0.9678	-0.683701	0.216436	-1.99064	1.32762	0.981759	-0.412206	0.397979	-3.15966	0.769379	0.0382387	-1.21053	-0.263044	-1.92681
PGM3	yes	no	no	no	no	0.605136	1.69368	-1.42533	0.183466	1.13206	-0.218134	1.1101	0.571302	-0.680741	-0.187993	0.485467	-0.197247	-2.4603	0.1578	2.3419
ATP2C1	no	yes	no	no	no	-0.198846	0.342792	0.17191	-0.317427	1.47663	0.331875	0.347881	1.71009	0.598357	0.193496	-0.756853	-0.763492	-0.624894	-0.173277	2.86274
MARCO	no	yes	no	no	no	-0.182574	-0.182574	-0.182574	-0.182574	-0.182574	-0.182574	-0.182574	-0.182574	-0.182574	-0.182574	-0.182574	-0.182574	-0.182574	-0.182574	-0.182574
DEF6	no	no	no	yes	no	-0.459243	-0.104149	-0.303429	-0.322982	-2.908	-0.434163	-0.91654	-0.710592	-0.365978	-0.480464	0.680106	-0.547185	0.0466677	-0.0316401	-1.37867
FAS	no	no	no	yes	no	-0.126723	-1.08987	0.0907428	0.459045	1.27802	0.0257839	-0.188489	1.30697	-0.786595	-1.66482	-1.40391	-1.15128	-2.22226	-0.95406	0.832069
TNFRSF1B	no	yes	no	no	no	1.32894	0.605333	1.0179	1.24488	-0.426939	0.253712	0.808845	-1.46325	-1.46325	0.756935	0.958391	0.0733451	0.212067	0.0103722	-0.0417961
BAK1	no	no	no	yes	no	-0.0935472	0.337966	1.1252	0.524459	-1.14779	-0.351447	0.970215	-1.13561	0.618064	-1.39907	0.582897	0.225618	1.00318	0.846704	-1.4429
IFT88	no	no	yes	no	no	0.205925	0.194949	-0.490773	0.244508	2.01202	-0.134739	0.773966	0.971393	-1.26279	-0.538118	-1.33962	0.29399	-2.0294	-0.0683253	1.6253
PIAS1	yes	no	no	no	no	2.29861	1.14349	-1.25477	1.47924	-0.198753	0.295159	1.29371	-0.867608	-1.18321	-0.6131	1.32103	1.3851	-2.07816	0.93836	-0.411298
MSR1	no	yes	no	no	no	-0.762739	-0.762739	-0.762739	-0.762739	-0.762739	-0.762739	-0.762739	-0.762739	0.809395	0.43089	0.596925	-0.762739	0.881298	1.53548	-0.762739
RETSAT	no	no	no	yes	no	-1.63352	-1.5715	1.63548	-1.39859	1.23112	-1.43035	-1.12734	0.448557	-1.56824	1.82103	-0.766491	-0.959067	0.647502	-1.00743	0.95522
ZPBP	no	no	yes	no	no	-0.31652	-0.31652	-0.31652	-0.31652	-0.31652	-0.31652	1.84631	-0.31652	-0.31652	-0.31652	-0.31652	-0.31652	-0.31652	-0.31652	-0.31652
LCP2	no	yes	no	no	no	0.750143	1.36416	0.935798	-1.25556	-1.25556	-1.25556	-0.443052	0.312537	1.47607	0.0522729	0.207086	1.61374	-1.25556	-0.326271	0.61932
ROS1	no	yes	no	no	no	-0.251723	-0.251723	2.43166	-0.251723	-0.251723	-0.251723	-0.251723	-0.251723	-0.251723	-0.251723	-0.251723	-0.251723	-0.251723	-0.251723	-0.251723
TNFRSF9	no	yes	no	no	no	0.288213	-0.943335	0.0928094	0.885936	0.66043	-0.943335	-0.943335	0.54142	-0.943335	-0.200043	-0.943335	-0.943335	1.44638	-0.943335	1.62309
RRP12	yes	no	no	no	no	0.771273	0.552901	0.22347	0.699765	-3.38594	0.867929	0.605773	0.0957172	0.729984	-0.555063	1.15969	0.753578	-0.114751	0.544881	-1.52771
KIF1B	no	yes	no	no	no	-0.515866	-1.42023	-1.41762	-0.769762	0.592084	-0.853095	-1.4002	0.696544	-1.27051	1.1552	-1.18389	-1.08516	-0.924334	-1.35194	0.786615
CYFIP2	no	no	no	yes	no	-1.62658	-1.57753	-0.00863448	-1.26705	0.492346	-1.59248	-1.43566	0.0874505	-1.47161	1.23161	-1.48588	-1.20886	0.881624	-0.886849	0.749967
EIF2AK2	no	yes	no	no	no	-0.381399	0.944371	-1.83979	0.315524	1.98132	1.18958	0.682077	0.271722	-0.127811	-1.12138	-0.838705	-1.26669	-2.13472	-1.66649	1.51408
NPFFR2	no	yes	no	no	no	-0.380015	-0.380015	-0.380015	-0.380015	-0.380015	1.83416	-0.380015	2.23606	-0.380015	-0.380015	-0.380015	-0.380015	-0.380015	-0.380015	-0.380015
DCBLD2	no	yes	no	no	no	-0.169899	-0.249535	-1.02419	-0.669831	0.648799	0.970599	-1.44707	0.271417	-0.574517	-0.166864	-1.4385	-1.51584	-2.84972	-0.836728	1.02668
SEC61A1	no	no	no	yes	no	-0.312161	-0.555493	2.52849	-0.803134	1.54105	-0.963671	-1.03552	0.939441	-0.975738	2.34562	-0.623206	-0.128529	1.50021	-0.262737	0.259051
MXD1	no	yes	no	yes	no	0.439098	-1.06761	0.142411	-0.699523	2.09225	0.319715	-0.888858	0.75972	-1.19741	0.479485	-0.259682	-1.75161	0.811512	-0.763096	1.22428
GNA15	no	yes	no	no	no	-0.764647	-0.764647	0.694609	1.81161	0.652765	1.58372	-0.764647	0.529325	0.614119	-0.764647	-0.764647	1.33703	-0.764647	-0.764647	1.17954
APPBP2	yes	no	no	no	no	0.385068	0.972017	-0.807934	0.777248	2.14356	1.44311	0.934469	0.467746	1.01467	-0.459684	-0.0593738	-0.377731	-2.17932	-0.453078	2.05046
RPL18	no	no	no	yes	no	-0.258675	-0.00451541	3.36445	0.103143	-0.306031	-1.29727	-0.085167	-1.69581	-0.563257	0.595581	1.03011	1.20943	1.97197	1.12214	-0.348477
TM7SF3	no	no	no	yes	no	0.376924	-1.24009	-0.397117	0.502132	0.713008	0.643186	0.465995	-1.72061	0.245267	-1.53001	-0.0493001	0.933574	-1.25056	0.305105	-0.339015
SLC12A2	no	no	yes	no	no	-0.708765	-0.576502	-1.06974	0.0550064	2.63412	0.121696	-0.309795	1.02991	-0.126044	0.518364	-1.47301	-1.1782	-1.49311	-0.958218	2.86488
CALCRL	no	yes	no	no	no	0.807485	1.72652	0.00430094	-0.315536	0.199	0.949438	0.47384	-1.92026	0.591391	0.0308119	-0.851418	0.426131	-0.345511	0.0673452	1.31167
GNAI3	yes	yes	no	no	no	1.22536	1.62563	0.0031943	1.11978	-0.27896	1.72813	1.92269	-0.0229637	0.914778	-1.87409	0.994963	1.01103	-1.22551	1.03206	0.612575
DGKA	no	no	no	yes	no	0.485218	0.883444	0.86174	-0.45284	0.627233	-1.53969	-0.602896	0.422565	-0.465002	1.6558	1.85376	-0.948218	-0.698227	-1.37339	-0.740773
SNAP91	no	no	yes	no	no	-1.9558	-0.328464	-0.992243	-0.160143	0.763317	-1.50711	-0.470798	1.90435	-0.383543	1.46997	-1.76075	-0.158762	-0.736178	0.0423482	0.827987
IDI1	yes	no	no	no	no	0.617385	0.785869	-0.649858	0.94045	1.57065	1.81124	0.997132	-1.15979	1.08421	-0.0106883	0.222257	0.206933	-1.91019	0.576635	2.48164
KLF6	no	yes	no	no	no	-0.697479	-0.794887	0.478764	-0.559919	1.05876	0.29847	-0.66544	0.205267	-0.272886	0.365668	-1.1823	-0.934377	-0.186187	-0.811165	0.595202
PLPP1	yes	no	no	no	no	1.22977	1.62298	1.01312	0.713283	-1.13046	1.45809	1.46565	0.262635	1.24735	-1.45661	1.32162	1.16119	0.391085	1.079	-1.14413
DNTTIP2	no	no	no	yes	no	0.995508	1.80879	-0.568941	1.75144	-0.865065	1.14512	1.52944	0.0714861	1.11662	-0.913763	1.43842	1.46002	-1.12387	1.15579	-0.0096167
IP6K2	no	no	no	yes	no	-1.8342	-1.14977	0.970557	-0.799414	1.41988	-1.78466	-1.75815	-0.0709232	-1.09102	1.63234	-0.945029	-1.3562	0.64461	-1.02819	0.902981
ADAM7	no	no	no	no	yes	1.24586	1.01563	-0.951701	-0.0665385	-2.16883	0.943512	0.970757	-0.880484	0.0630298	-2.28828	1.18251	0.61806	-1.41076	0.258603	-2.38336
ELP1	no	no	no	yes	no	1.01104	1.72657	0.199007	1.28743	-0.905914	1.35225	0.907571	0.0674969	1.43418	0.220765	0.806046	1.18832	0.495348	1.32846	0.910376
CSNK2A2	no	no	yes	no	no	1.92884	-0.0449439	-2.93949	1.29733	0.657088	1.10523	0.425642	0.826368	0.755849	-0.724074	-0.261372	-0.461867	-1.8028	-0.465978	-0.0462107
PTPN21	yes	no	no	no	no	0.488735	0.763095	-1.46685	-0.328259	-1.62549	0.414918	0.0166458	-2.07609	-0.586343	-1.46362	1.11141	0.0922073	-1.82237	-0.220431	-1.57712
ATP2B1	no	yes	no	no	no	-1.11157	-0.982688	-0.335111	-0.687518	2.28458	-0.959031	-0.742366	0.955257	-0.72569	1.50373	-1.42113	-0.931755	0.0723364	-0.870671	2.47221
ACTN1	yes	no	no	no	no	0.938305	0.262224	-0.560863	0.440323	-2.34	0.163678	-0.425749	-0.960889	0.258908	-0.362105	1.03609	0.636365	0.699301	1.0344	-2.09106
CHFR	no	no	yes	no	no	-1.19377	-0.527519	0.205332	-2.13087	-1.70528	0.0804728	-0.981395	-0.595149	-1.18502	-0.263297	-0.00148246	-0.221913	1.30838	-0.728121	-1.02843
PVR	no	yes	no	no	no	0.424348	0.277691	0.867915	0.575732	-2.15012	1.00057	1.09007	0.117193	0.0857532	-0.823465	1.89025	1.09903	1.10273	1.4434	-2.5678
TP63	no	no	no	yes	no	-0.481531	-0.481531	-0.481531	-0.481531	-0.481531	1.39945	1.37935	-0.481531	-0.481531	-0.481531	-0.481531	-0.481531	-0.481531	-0.481531	-0.481531
SCARF1	no	yes	no	no	no	0.877282	-1.32963	0.939174	-0.202744	0.690968	0.127293	-0.53904	0.22866	-0.211853	2.39629	-0.699376	-2.30086	0.362056	-1.84303	0.758128
LMAN1	yes	no	no	no	no	0.672398	1.1869	0.400678	0.330707	1.47834	1.06229	1.39262	1.46422	0.584445	-0.027065	0.698738	0.625741	0.70056	0.225207	2.19383
SRI	no	yes	no	no	no	1.1634	1.04103	0.843517	0.238531	1.36273	0.453158	1.08765	-0.9689	1.47999	-0.0579547	0.646616	0.377309	-0.2755	0.84252	0.748987
TPD52	yes	no	no	no	no	1.76367	1.31357	-0.67784	1.0563	-0.96087	2.01779	1.7064	-0.496518	1.22002	-1.66725	1.60801	0.94028	-1.19757	0.333147	0.0605048
TRAF4	no	no	no	yes	no	-0.942018	-1.35594	2.41341	-1.08628	-0.721389	-1.69615	-1.03586	-1.04868	-0.560457	0.844765	-0.209998	0.69975	2.15614	0.496138	-1.3226
IL4R	no	yes	no	no	no	-2.12457	-1.35329	0.540146	-1.4322	0.0906942	-1.47483	-0.547816	0.371245	-1.16823	0.873648	-1.1849	-1.97175	0.466943	-0.864407	0.589718
PIAS2	no	no	yes	no	no	-0.0381639	1.10101	-1.27242	0.0321656	1.13685	1.96447	0.13868	0.095441	-0.0130383	-2.45807	-0.353708	0.598137	-2.12364	-0.741958	0.945865
LAMP3	no	yes	no	no	no	0.132168	0.215865	1.95821	-1.06188	1.22789	0.186401	-0.315979	1.08736	-1.06188	1.41614	0.280859	0.384973	-1.06188	1.02322	1.21267
EDN1	no	yes	no	no	no	-0.965765	0.253151	0.872356	-1.01863	-0.602496	-0.244605	0.195798	-0.00425867	-2.16771	-0.959152	0.127579	-1.26565	1.02331	-0.378264	-0.130336
MLLT10	no	no	yes	no	no	0.459649	-0.887032	-0.916189	0.0838442	0.391332	-0.162778	0.979382	0.434855	-0.331682	-1.9864	-0.630453	-0.648849	-1.0956	-1.37599	0.0501084
VDAC3	no	no	yes	no	no	1.22117	1.24686	0.7548	1.48019	-0.653778	0.788707	1.31739	-1.12676	0.979248	-1.24044	1.28834	1.49651	-0.299353	2.10143	-0.36626
XRCC5	yes	no	no	no	no	1.59684	1.53542	-0.363735	1.52142	-0.619228	1.42336	1.54885	-0.868949	0.961073	-1.27358	1.28993	1.29353	-0.740919	1.78228	-0.701812
SLC4A4	no	yes	no	no	no	1.32924	0.44767	-1.32737	0.989325	-1.78049	1.67241	1.32877	-0.290632	1.02089	-2.29338	1.03016	0.573203	-1.30949	0.428663	-1.51234
SESN1	no	no	no	yes	no	-1.00272	-0.775763	0.509765	-0.444834	2.56316	-0.340717	-0.524007	0.955431	-0.436198	0.87478	-1.33731	-1.35282	0.213502	-0.272965	2.63271
PSEN1	no	yes	no	no	no	-1.55597	-0.900508	0.172371	0.295074	1.03586	0.254602	0.226881	-0.123859	0.268526	-0.463204	-1.60713	-1.11979	-2.4073	-0.647094	0.747453
CDC14B	yes	no	no	no	no	-1.02284	-0.782998	-0.114437	-1.4944	-1.50584	-0.110598	-0.642972	-0.312537	-1.27446	-0.50074	-1.19983	-0.643856	-1.1878	-1.84936	-0.00906685
IL12RB2	no	no	yes	no	no	-0.566101	-0.566101	-0.566101	-0.566101	1.18913	-0.566101	-0.566101	1.03627	2.16637	-0.566101	-0.566101	-0.566101	-0.566101	-0.566101	0.904994
OPRK1	no	yes	no	no	no	-1.30302	-1.08541	0.640612	-1.12722	1.81075	-0.607768	-0.345581	0.316446	-0.280148	1.94995	-0.979975	-1.66436	0.193674	-0.700011	1.4889
CD82	no	yes	no	yes	no	-1.41271	-0.473505	0.59201	-0.631064	-0.762616	-0.906943	-1.37542	0.503627	-0.678379	1.25642	-1.42844	-1.33009	1.11665	-0.720973	-0.793696
MAST2	no	no	yes	no	no	0.734004	0.226208	-1.32027	0.163502	-2.64049	0.250274	-0.427792	0.316736	0.0119275	-1.76489	1.85319	1.654	0.89029	0.289111	-2.26424
B4GALT1	yes	no	no	no	no	-0.130975	-0.0516622	0.624757	-0.700532	2.94722	-0.333578	-0.714265	1.22992	-0.327767	2.16279	-0.388692	-0.877795	0.669615	-0.710988	1.77008
PPP1R15A	no	no	no	yes	no	-1.13225	-1.22121	0.8354	-1.07575	0.265971	-0.753882	0.461975	0.370867	-0.369024	1.56914	-0.35149	-1.77839	1.81465	-0.175231	1.17052
HSD17B14	yes	no	no	no	no	-1.75624	0.330107	0.623644	-1.25037	0.937741	-1.25618	-0.540953	0.448105	-0.786146	1.11508	-3.14593	-0.733985	1.23335	-0.0523714	0.612924
BAX	no	no	no	yes	no	0.582588	0.567727	1.57717	0.636962	-1.28547	0.0496653	0.143369	-1.43779	-0.787826	-2.09828	0.848432	0.79683	-0.280142	1.41741	-2.3979
PGS1	no	no	yes	no	no	-1.1066	-0.615334	-0.125029	0.811672	-0.766948	-1.41743	-0.548607	-0.0887467	-1.01856	0.378216	1.20676	0.233066	-0.384721	0.140262	-1.73926
GMCL1	no	no	yes	no	no	0.273512	1.26014	-0.263727	0.0359589	0.846908	1.979	1.1529	0.457292	1.65796	-0.710317	0.843449	0.021744	-0.552857	0.210845	1.81097
AURKA	no	no	yes	no	no	1.22763	1.49704	-0.09803	1.68946	-0.666526	1.42727	1.56388	-0.635204	1.55508	-0.685219	1.10715	1.4041	-0.389258	1.50469	-0.671389
P2RX7	no	yes	no	no	no	-0.779683	-0.613799	1.01057	0.608795	0.220509	0.126689	0.493628	0.509117	-2.05379	1.19876	0.425441	-2.68027	-0.910432	0.615914	1.37274
PEBP1	no	no	yes	no	no	0.691679	0.887325	1.27481	1.43169	-0.797813	0.25205	0.854198	-2.32346	0.215148	-1.98126	1.22778	0.780441	0.0264537	1.59016	-1.6455
NOS1	no	no	yes	no	no	-0.121338	0.925271	0.433354	1.29342	-1.77938	-0.0460306	-0.0619832	-0.542412	1.33987	0.789086	0.0851325	-0.535012	0.988967	0.147368	-1.77938
CCNK	no	no	no	yes	no	2.11836	0.483498	-1.17526	1.17964	0.0218645	1.57717	0.852951	-0.229366	1.13459	-0.057029	1.42222	1.17185	-0.568706	0.823526	-0.202746
RGS1	no	yes	no	no	no	-0.676661	-0.676661	-0.676661	-0.676661	-0.676661	0.386823	0.37546	-0.676661	-0.676661	-0.676661	1.21732	-0.676661	0.723431	-0.676661	-0.676661
ICAM1	no	yes	no	no	no	-0.963282	0.814154	-0.963282	-0.963282	0.39411	-0.963282	0.757186	1.03923	-0.963282	0.706865	0.178654	-0.963282	1.81002	0.966912	-0.963282
TBX15	no	no	no	no	yes	1.48852	0.880471	-0.980956	0.552762	-1.37143	0.967246	0.867648	-1.07396	0.341376	-1.73745	1.23398	0.740332	-1.06793	0.0828524	-1.74418
TEKT2	no	no	yes	no	no	0.283455	1.19799	0.0535803	-1.16535	0.0186277	-1.16535	0.335319	-0.0844827	0.677814	-0.290934	-1.16535	-0.0780166	1.64593	-1.16535	1.29047
FKBP5	yes	no	no	no	yes	1.73004	1.39548	-0.808562	0.412654	-1.97083	1.52932	1.19451	-0.693844	0.377163	-1.77131	1.70532	0.862329	-0.86984	0.334098	-1.67874
PGC	no	no	no	no	yes	1.50337	1.16668	-0.754682	0.542985	-2.41549	1.00804	1.09796	-1.55893	-0.204764	-1.83768	1.26403	1.04276	-0.861175	0.747402	-1.96135
SIRT1	no	no	yes	no	no	0.952416	1.5808	-0.72606	0.268302	0.864644	2.10741	1.37368	1.04916	1.26426	-0.374846	0.446648	0.332973	-1.3924	-0.881918	1.28221
SCD	yes	no	no	no	no	-0.159159	-0.258665	0.531577	-0.493067	2.81834	-0.574293	-0.671738	1.21728	-0.709054	2.50299	-0.679833	-0.296191	1.13213	-0.319981	2.00905
MKNK2	no	no	no	yes	no	-1.43873	-1.3159	0.854241	-0.820967	1.78031	-1.59312	-1.40534	0.306639	-1.02611	2.61444	-0.970856	-0.90576	1.28088	-0.242879	1.24894
OSM	no	yes	no	no	no	-0.813355	0.957279	0.578761	-0.813355	-0.813355	0.231439	-0.813355	0.421082	-0.813355	1.74986	1.04734	-0.813355	-0.813355	-0.813355	-0.813355
DMC1	no	no	yes	no	no	0.401509	0.540589	0.773929	-0.209104	0.716405	0.243596	0.472936	-2.31501	-2.31501	0.167232	1.40041	-1.25095	-1.13642	0.160796	0.639526
NEFH	no	no	yes	no	no	-0.548609	0.962829	0.559192	0.766486	-0.760297	-0.496008	0.132084	0.626936	0.162888	-0.19269	0.50485	1.03236	-1.70671	1.1151	-1.70671
HMOX1	no	no	no	yes	no	-1.64538	-1.48837	1.51914	-0.394734	0.836774	-1.62248	-1.10488	0.505704	-1.06981	1.90588	-1.56452	-0.985479	1.2315	-0.251694	0.975339
IL2RB	no	yes	no	no	no	-0.996895	-0.996895	0.173029	0.3325	-0.996895	-0.996895	-0.996895	1.50605	-0.996895	1.43767	-0.996895	-0.996895	1.32485	-0.996895	-0.0444762
PMM1	no	no	no	yes	no	-0.131412	-1.72368	0.99273	-1.86139	1.09627	-1.83639	-1.4062	-0.323995	-0.583983	2.15804	-0.221974	-0.282527	1.81662	-0.223852	0.94737
ABHD4	no	no	no	yes	no	-1.52089	-1.32162	0.874137	-1.5931	0.648511	-1.65621	-1.29368	-0.248936	-1.36903	1.70879	-1.07517	-0.95274	0.950807	-0.912749	0.544976
CDKN3	no	no	yes	no	no	1.60305	1.1377	0.146819	1.47012	0.190105	1.2945	1.60361	-0.632944	1.27414	-0.436312	1.47409	1.47432	-0.615552	1.43356	-0.116473
CGRRF1	no	no	no	yes	no	0.258502	1.68767	1.16914	0.716566	1.41157	0.110631	0.774784	1.02853	0.566337	-0.569143	-0.395555	-1.52607	-0.7432	-0.366817	1.74447
HIF1A	no	yes	no	no	no	1.39989	1.24537	-1.25607	0.376196	1.12164	0.135912	1.1421	1.07329	-0.426561	-0.2564	0.290847	0.851119	-1.76888	0.404081	1.66073
ZC3H14	no	no	yes	no	no	1.63582	1.46339	-1.03636	1.03181	-0.252079	0.803672	1.08185	-0.863261	-0.114466	-2.20539	0.784573	1.58334	-1.92388	1.26713	-1.20702
BDKRB1	no	yes	no	no	no	-0.603865	1.25845	-0.337465	-0.0230001	-0.405463	-0.495709	-0.975841	1.1792	-0.468885	0.108639	0.0822117	-0.597211	2.12657	-0.222758	-0.318274
NFKBIA	no	yes	no	no	no	0.933283	1.0077	0.448049	0.176911	-2.02661	0.944237	1.02092	-0.838589	0.207715	-1.85315	1.42072	0.766666	0.420852	0.328314	-2.11025
PROCR	no	no	no	yes	no	0.543895	-0.978009	1.50453	-0.569459	-0.426701	-0.677487	-1.08047	-1.71448	-0.495586	-1.15926	-0.11977	-1.31152	1.65277	-0.616259	-0.678467
CD40	no	yes	no	no	no	-0.327217	-0.327217	2.70877	3.1226	-0.327217	-0.327217	-0.327217	-0.327217	-0.327217	-0.327217	-0.327217	-0.327217	-0.327217	-0.327217	-0.327217
TRIB3	no	no	no	yes	no	-0.443715	-0.262941	1.48696	-0.279604	1.85782	-0.498405	-0.363613	1.05667	-0.351948	2.21653	-0.266448	-0.0174483	1.57972	0.0377526	1.81051
VAPA	yes	no	no	no	no	0.519371	1.18366	0.871458	1.21667	1.63973	1.40647	1.23951	-0.0939798	1.49216	-0.942544	-0.231343	0.464486	-1.15689	0.530338	1.84958
MYL12A	yes	no	no	no	no	0.713001	-0.053217	2.04751	0.327674	0.403247	-0.138005	0.679886	-2.4855	-0.874046	-1.7046	0.736794	0.292126	-1.56766	0.883759	-0.209335
LAMA1	no	no	no	no	yes	1.31328	0.966514	-0.61919	0.681829	-2.38611	1.20886	1.05174	-0.493899	0.410873	-1.91367	1.42942	1.00741	-0.747222	0.736213	-2.01817
PCSK1N	no	no	yes	no	no	-0.895056	-1.5943	1.02383	0.319526	0.0619843	-0.290029	-2.02026	0.31453	-0.119528	2.21141	-0.0523792	0.505766	1.94182	0.482538	-0.00146973
SMS	yes	no	no	no	no	1.80288	1.31166	-0.287267	0.836938	-2.01162	1.60851	1.44226	-1.06172	0.451045	-1.82309	1.63323	1.17209	-0.76191	0.947192	-1.40101
TIMP1	no	yes	no	no	no	-0.56573	-0.56573	-0.56573	-0.56573	-0.56573	-0.56573	-0.56573	-0.56573	-0.56573	-0.56573	1.0366	1.18345	1.37173	-0.56573	-0.56573
TSC22D1	yes	no	no	yes	no	0.174207	-0.096083	0.290975	-0.648957	2.55038	-0.219447	-0.427809	0.796316	-0.657013	1.5384	-0.905573	-0.88395	0.375773	-0.407745	2.21927
CCL22	no	yes	no	no	no	-0.550091	1.45889	1.02942	-0.550091	-0.550091	-0.550091	-0.550091	0.850518	-0.550091	0.582995	-0.550091	-0.550091	1.93015	-0.550091	-0.550091
CCL17	no	yes	no	no	no	-0.383204	-0.383204	-0.383204	2.76869	-0.383204	-0.383204	-0.383204	2.07642	-0.383204	-0.383204	-0.383204	-0.383204	-0.383204	-0.383204	-0.383204
UBE2I	yes	no	no	no	no	1.67247	0.837702	0.995039	1.21066	-1.0372	0.658866	0.602746	-1.86664	0.888403	-0.666702	1.01394	1.28004	0.137006	1.09402	-2.15137
MEFV	no	yes	no	no	no	0.238721	-2.57054	-0.176601	0.0448559	0.704762	-0.106556	-0.564823	-0.955726	0.798755	0.262652	-1.26238	0.359125	0.0553789	-0.289831	1.21626
CCP110	no	no	no	yes	no	1.14471	1.54325	-0.393142	1.28868	-0.475922	1.54916	1.70485	1.03388	1.29973	-1.92692	1.02233	1.18039	-0.927506	0.202827	-0.0735322
HOMER2	yes	no	no	no	no	1.05334	0.761946	-0.559718	-0.113351	-2.61309	0.876123	0.725884	-0.453958	-0.107916	-2.42437	1.01137	0.682773	-0.165864	0.0646266	-2.71974
SCG3	no	no	yes	no	no	1.78963	-1.02743	0.209552	0.378164	0.887196	-0.0990656	-0.108985	0.0694443	-1.02743	-1.02743	1.09801	-1.02743	-1.02743	0.0230218	-1.02743
RIPK2	no	yes	no	no	no	0.855139	0.791424	1.56882	0.772074	0.191299	0.834721	0.916585	-0.507582	1.0544	-0.661833	0.0152	1.14369	0.403536	0.403722	1.07736
NDRG1	yes	no	no	yes	no	1.8944	1.07986	-0.438268	-0.340695	-1.57582	1.20521	0.872179	-0.85299	-0.173005	-1.7275	2.26688	0.510588	-0.65213	-0.160815	-2.06505
GSR	yes	no	no	no	no	1.78484	1.64392	-0.213049	0.562461	-1.83759	1.46069	1.09314	-1.01549	0.629028	-2.1779	1.23904	0.746206	-0.562433	0.893678	-2.31482
ADAM2	no	no	yes	no	no	-1.14466	-1.14466	0.0402866	-1.14466	1.8667	-1.14466	-0.26485	-0.0939271	-1.14466	0.271501	-0.176382	1.03219	-1.14466	-1.14466	1.24269
TULP2	no	no	yes	no	no	-0.308524	-0.308524	-0.308524	-0.308524	-0.308524	-0.308524	-0.308524	-0.308524	-0.308524	1.38177	-0.308524	-0.308524	-0.308524	-0.308524	-0.308524
EBI3	no	yes	no	no	no	-0.182574	-0.182574	-0.182574	-0.182574	-0.182574	-0.182574	-0.182574	-0.182574	-0.182574	-0.182574	-0.182574	-0.182574	-0.182574	-0.182574	-0.182574
TGFB1	no	no	no	yes	no	-0.108601	1.51379	-0.850634	0.171561	-1.51082	0.341934	0.982431	1.4159	-0.49355	-0.576843	1.26149	-0.581292	0.205123	-2.55368	-0.122782
ICAM4	no	yes	no	no	no	-0.182574	-0.182574	-0.182574	-0.182574	-0.182574	-0.182574	-0.182574	-0.182574	-0.182574	-0.182574	-0.182574	-0.182574	-0.182574	-0.182574	-0.182574
ZNRF4	no	no	yes	no	no	-0.182574	-0.182574	-0.182574	-0.182574	-0.182574	-0.182574	-0.182574	-0.182574	-0.182574	-0.182574	-0.182574	-0.182574	-0.182574	-0.182574	-0.182574
THEG	no	no	yes	no	no	1.99656	-0.565886	2.85382	-0.565886	-0.565886	1.05211	1.03483	-0.565886	-0.565886	-0.565886	-0.565886	1.35724	1.56424	1.26489	-0.565886
GAPDHS	no	no	yes	no	no	0.0888526	-1.17254	-1.17254	-1.17254	-1.17254	-0.376059	-1.17254	-1.17254	0.863809	1.03588	0.245929	-1.17254	0.493901	-0.271316	1.2303
HPN	no	yes	no	no	no	-1.87525	-1.37949	1.13	-1.08314	0.967649	-2.23879	-1.56836	-0.0582982	-0.742814	1.88871	-0.813451	-0.936805	1.51783	-0.195842	0.747719
SCN1B	no	yes	no	no	no	-0.568979	-1.17762	-0.278018	-0.0789283	-0.659414	0.416662	-1.05853	1.00939	-1.06092	0.399772	-0.98537	-1.5939	1.81855	-1.42368	1.66589
CDK6	yes	no	no	no	no	-0.0273827	-0.556904	-2.0459	-0.853104	-0.389707	0.563982	0.199304	0.757263	-0.381375	0.569407	0.537031	-0.828243	0.798375	-1.78433	1.31039
NAMPT	no	yes	no	no	no	1.26302	1.45261	-0.0223202	1.15812	1.15054	1.57574	1.63116	0.167001	1.07916	-1.03021	0.69661	0.466523	-1.63104	0.115341	1.15775
ITGB8	no	yes	no	no	no	0.241295	-0.528295	0.917045	0.774927	-0.705417	-2.30695	-1.31113	0.590558	0.760807	-0.694122	-0.720122	-0.512099	0.385142	0.247413	1.77226
MET	no	yes	no	no	no	0.122023	0.946758	0.741103	0.835583	1.37106	0.457782	0.614975	1.0868	1.19468	0.993694	0.304571	0.797185	0.696256	0.760426	1.68941
SERPINE1	no	yes	no	no	no	-0.75774	0.932062	1.90272	-0.75774	-0.75774	0.239358	-0.75774	1.14604	-0.75774	0.195323	-0.75774	-0.75774	0.554955	0.370484	1.01233
EZH2	no	no	yes	no	no	0.872153	1.48713	0.40787	0.89982	0.899001	1.19917	1.10214	0.462226	1.06676	0.290528	0.982107	1.26771	0.115677	1.54028	1.14789
AHR	no	yes	no	no	no	-0.81836	-0.0551018	0.0593894	0.0898268	1.61352	0.00205609	-1.25048	-0.120461	-0.368613	0.12058	-1.62012	-1.15578	0.391592	-0.653698	0.0714837
TLE4	no	no	yes	no	no	-2.12586	1.17752	0.116184	-0.50282	-0.892613	-0.26207	-0.287633	0.454978	-0.449537	-1.54127	-1.27823	0.738557	0.0841614	-0.706407	0.232708
AK1	no	no	no	yes	no	-1.22877	-1.93135	0.806776	-0.740895	-0.203347	-0.497826	-0.7667	-0.960454	0.24822	0.288374	-1.11813	-0.804377	0.209329	-1.157	-1.12635
ZMIZ1	yes	no	no	no	no	1.10341	0.838171	-0.84709	0.364895	-2.07884	0.89502	0.447843	0.631598	0.461395	-1.58631	0.879874	0.867905	0.0902858	0.305101	-2.59653
CSF3	no	yes	no	no	no	0.505508	-0.885325	-0.885325	-0.885325	0.251277	0.568678	1.32299	1.61812	-0.885325	-0.885325	0.0708669	0.1585	-0.885325	1.18534	1.11951
RAD51C	no	no	no	yes	no	1.15687	1.59593	0.562843	1.63955	0.130854	1.42515	1.44336	-0.676873	1.54381	-0.710351	1.18264	1.17372	-0.711713	1.41152	-0.539878
CCL7	no	yes	no	no	no	-0.26097	-0.26097	-0.26097	-0.26097	-0.26097	-0.26097	-0.26097	-0.26097	-0.26097	-0.26097	-0.26097	-0.26097	-0.26097	-0.26097	-0.26097
CCL2	no	yes	no	no	no	-0.474465	-0.474465	1.37067	-0.474465	1.31776	-0.474465	-0.474465	2.8999	-0.474465	1.73071	-0.474465	-0.474465	2.42288	-0.474465	-0.474465
NFKB1	no	yes	no	no	no	-0.966048	-0.859225	-0.936832	-0.782165	-0.551026	-1.11575	-0.850937	-0.385066	-0.956599	0.141062	-1.20653	-0.544582	-0.321755	0.496966	-0.340079
INPP4B	yes	no	no	no	no	1.20708	0.893192	-1.62084	-0.117333	-2.02133	0.962123	1.19233	-0.629124	0.178172	-2.62442	1.1422	0.917721	-0.991663	-0.126448	-1.93944
FBXW7	no	no	no	yes	no	0.756359	1.85939	-1.1733	-1.17209	-0.462826	-0.138698	2.12619	-1.26584	0.47489	-1.11415	1.07148	-0.555996	-0.441591	-1.63484	-1.0061
DDX25	no	no	yes	no	no	0.71651	0.0563125	-0.263693	-0.103268	-0.297441	1.5432	0.00833555	0.711727	1.75675	-0.0340445	0.581623	1.08781	-1.44061	0.184963	0.575811
ZBTB16	no	no	no	yes	no	0.876913	0.585657	-0.385712	0.329089	-2.17773	0.993793	0.740157	0.183218	0.500376	-1.37678	1.23081	0.734183	-0.0863624	0.255869	-1.70141
VWA5A	no	no	no	yes	no	-2.16121	-1.1523	1.09853	-1.13371	1.57546	-1.62369	-0.737658	0.0686078	-0.0807756	1.88933	-0.803901	-0.716445	0.711133	-0.834348	2.06041
CCND1	yes	no	no	no	no	0.193718	0.27825	-0.263382	0.834106	-1.24758	0.654072	0.402196	-0.774202	0.866533	-1.42393	0.0446385	-0.4485	-1.18102	0.0455274	-1.47839
IL10RA	no	yes	no	no	no	0.904349	-1.23576	-1.23576	0.0910367	-0.101605	0.643309	-0.368802	-0.200376	0.529844	-0.39814	0.324901	-0.194182	0.597732	1.18774	-1.23576
SLC1A2	no	yes	no	no	no	0.772395	0.0399039	1.05811	-1.70044	-0.343717	-0.0958016	0.976527	0.0436418	0.377765	-0.834031	1.4659	-0.555404	0.617805	-1.28597	-0.0250738
CD81	no	no	no	yes	no	0.310606	0.747948	0.861004	0.66417	-0.622689	-0.349302	0.35003	-1.05872	0.500056	0.492358	1.11141	1.22057	1.88426	1.63942	-2.1537
CD69	no	yes	no	no	no	-0.182574	-0.182574	-0.182574	-0.182574	-0.182574	-0.182574	-0.182574	-0.182574	-0.182574	-0.182574	-0.182574	-0.182574	-0.182574	-0.182574	-0.182574
SLC11A2	no	yes	no	no	no	0.508936	0.36824	-0.970793	-0.0616971	2.21369	-0.312343	-1.06989	0.309696	0.267281	-0.608874	-1.05693	-0.912503	-1.56679	-1.0001	1.32889
CSRNP2	no	no	no	yes	no	-1.63858	-0.688271	-1.03904	-0.446843	1.61733	-1.40723	-1.33355	0.188465	-0.863667	1.31922	-1.63964	-1.10199	-0.859144	-1.31432	0.920081
CAMKK2	yes	no	no	no	no	1.83575	1.53148	-0.259273	0.0441524	-1.17034	1.49835	1.03635	0.20208	0.425966	-1.46516	1.13798	1.35168	-0.0397449	0.689816	-1.55328
GSG1	no	no	yes	no	no	-0.486817	-0.486817	-0.486817	-0.486817	-0.486817	2.12888	-0.486817	-0.486817	-0.486817	-0.486817	-0.486817	-0.486817	-0.486817	-0.486817	-0.486817
VDR	no	no	no	yes	no	0.875118	-0.672609	-1.04831	0.158041	-1.51568	-0.213952	-0.741424	-1.38042	0.184969	-1.46249	-0.618556	-0.0218629	-0.45235	0.490752	-1.08625
ACRBP	no	no	yes	no	no	0.510071	0.354317	-0.286283	-1.51606	0.740115	-0.638989	0.908571	-1.42156	0.188983	0.359746	0.297352	1.07686	0.0161677	-1.05332	0.839867
LDHB	no	no	no	yes	no	1.07924	1.53385	0.69685	1.38495	-0.367854	1.09242	1.45475	-0.372607	0.962446	-0.495536	1.45002	1.47853	0.213325	1.91943	-0.278433
PRKAB1	no	no	no	yes	no	-1.47262	-1.47474	0.241086	-1.11771	0.306367	-0.453816	-1.76068	0.993933	-1.28928	1.4697	-0.908483	-0.751256	-0.158995	-0.792465	0.545459
MAK	yes	no	no	no	no	1.38855	1.04892	-0.354059	0.8222	-2.49087	0.982069	1.19876	-0.430924	0.30268	-2.45427	1.1723	0.548496	-1.06911	0.832545	-1.80638
TPD52L1	no	no	no	yes	no	-0.367414	-0.606949	2.49091	-0.475246	1.52813	-0.0944754	0.257564	1.67749	-0.158217	0.660814	-0.552953	0.21423	1.54563	-0.404258	1.41997
RPS12	no	no	no	yes	no	-0.359518	0.15956	2.81399	0.631701	-0.470995	-1.57355	-0.342448	-1.90481	-1.59491	0.601241	0.674605	0.68987	1.22126	1.20888	-0.0892477
PERP	no	no	no	yes	no	0.530892	1.46144	0.965252	0.379113	1.31271	1.8641	1.23346	0.415331	1.82345	-1.41023	-0.122438	-0.36224	-0.417828	0.338488	1.35369
PACRG	no	no	yes	no	no	-0.0250533	-0.719483	0.592415	-0.745787	0.928358	-0.293113	-1.02153	-0.952373	-0.307691	1.94455	-2.85321	-0.934669	-0.887759	0.0766305	0.843832
CCND3	yes	no	no	yes	no	0.14817	0.788138	1.11116	0.613295	-1.44427	0.263471	0.315885	-0.936399	0.74301	-1.57812	1.15572	0.701302	0.344321	1.15147	-2.81431
SRF	yes	no	no	no	no	-0.381507	-0.28236	-0.34824	-0.412222	-2.81079	1.43719	-0.493415	-0.408038	0.109296	-0.216144	0.604213	-0.304376	-0.34239	0.631643	-2.78067
TTK	no	no	yes	no	no	1.21876	1.52512	-0.443067	1.88536	0.592339	1.56932	1.48352	0.464045	1.42006	-0.704317	0.84177	0.828441	-1.42903	0.739355	0.430705
MEP1A	no	yes	no	no	no	1.06133	-0.657826	-0.657826	1.89571	-0.657826	-0.657826	-0.657826	0.624733	-0.657826	-0.657826	-0.657826	0.632405	-0.657826	0.570452	0.519656
HMGCS1	yes	no	no	no	no	0.648345	1.14168	-0.928933	0.109825	2.03987	0.904965	1.04656	-0.358984	0.0325628	0.837404	0.114439	0.0684928	-1.92679	0.0199838	2.27371
HBEGF	no	yes	no	yes	no	-0.486906	-1.15033	1.16027	0.0454586	1.00252	-1.62458	-1.35678	-0.526523	-0.611191	1.49554	-1.67633	-1.52303	1.54161	0.0658482	1.16789
HMGCR	yes	no	no	no	no	1.8979	1.6712	-0.824464	0.768339	0.10227	2.0013	1.52729	-0.664461	0.77284	-0.834999	1.34193	0.792317	-1.39987	0.629122	0.175678
IL12B	no	yes	no	no	no	-0.262439	-0.262439	-0.262439	-0.262439	-0.262439	-0.262439	-0.262439	-0.262439	-0.262439	-0.262439	-0.262439	-0.262439	-0.262439	-0.262439	-0.262439
CCNG1	no	no	no	yes	no	-0.129186	0.997114	0.628313	0.974915	1.89075	1.26703	0.879405	0.874311	1.39299	-0.393836	-0.783227	-0.50743	-0.860538	-0.152881	2.50632
LIFR	yes	no	no	no	no	1.82869	1.02692	-2.50247	-0.272681	0.552077	1.74209	1.46756	-0.377649	-0.0371671	-1.39626	1.20518	-0.287387	-1.9869	-0.68219	0.916462
FAM162A	no	no	no	yes	no	-0.207104	0.0747597	0.138121	-0.15575	-1.17894	-1.14901	-0.477542	-3.03341	-1.16325	-0.936746	0.284785	0.0135774	-1.33784	0.624396	-1.44882
PRKAR2A	no	no	yes	no	no	1.30858	0.994664	-1.02335	0.52913	-1.88446	1.10387	0.724928	-0.987639	0.777201	-2.56182	0.68132	0.572805	-1.07661	0.498301	-2.31191
MAPKAPK3	no	no	no	yes	no	-2.05435	-1.28165	1.86965	-0.549896	0.70841	-1.89214	-1.4896	-0.359278	-0.91372	1.18964	-1.34646	-1.20636	0.629574	0.0986112	0.342484
ABCC5	no	no	no	yes	no	-1.25588	-1.56642	-0.911645	-0.871636	0.4932	-1.26592	-1.67425	0.114681	-1.38623	0.993081	-1.45752	-1.31183	-0.223879	-1.32396	0.651484
IL1A	no	yes	no	yes	no	-0.322618	-0.322618	-0.322618	-0.322618	-0.322618	-0.322618	-0.322618	-0.322618	-0.322618	-0.322618	3.57797	-0.322618	-0.322618	-0.322618	-0.322618
CCL20	no	yes	no	no	no	-0.620475	-0.620475	-0.620475	-0.620475	1.46082	1.54348	-0.620475	-0.620475	-0.620475	1.85537	1.1768	0.579019	2.04804	-0.620475	2.08866
STEAP3	no	no	no	yes	no	1.43555	0.212596	-0.316431	0.150799	-1.59915	0.831423	-0.583606	-0.213703	0.508691	-0.401516	1.28583	1.86805	-0.484068	0.95204	-1.95767
POMC	no	no	yes	no	no	-0.260889	-0.260889	-0.260889	-0.260889	-0.260889	-0.260889	-0.260889	-0.260889	-0.260889	-0.260889	-0.260889	-0.260889	-0.260889	-0.260889	-0.260889
STAM2	no	no	yes	no	no	-0.424094	-1.20616	-0.950289	-0.320782	2.36832	-1.26693	0.22306	-0.201879	0.204912	0.0237802	-1.05452	-0.480367	-0.472196	-1.32118	2.10753
PCSK4	no	no	yes	no	no	-1.54921	-2.22951	0.0163302	0.231259	0.346584	-1.77314	-0.803683	0.633455	-0.464222	1.77732	-0.777493	-1.14264	0.967473	-0.620904	-0.0199312
TACR1	no	yes	no	no	no	0.556893	1.134	-1.32824	1.79821	1.2856	-0.0502273	1.07567	-1.32824	1.23918	-1.32824	0.439014	-0.410759	-0.312004	-0.454815	0.042076
IL1R1	no	yes	no	no	no	1.8525	1.45936	-1.07917	-0.481582	-1.56197	0.786889	1.26123	-0.123489	-0.96827	-2.00652	1.4681	0.305448	-1.17557	-0.282844	-1.64735
IL18R1	no	yes	no	no	no	-0.593817	0.440819	-1.01569	1.48757	1.4413	1.28385	0.300862	0.857444	-2.09882	-0.175184	1.07331	1.60092	-0.00497285	0.45007	0.0295977
IL18RAP	no	yes	no	no	no	-0.261362	-0.261362	-0.261362	-0.261362	-0.261362	-0.261362	-0.261362	-0.261362	-0.261362	3.2655	-0.261362	-0.261362	-0.261362	-0.261362	-0.261362
SDC1	no	no	no	yes	no	-0.0703826	0.635921	2.24609	0.358605	-0.697978	-0.260045	-0.00502049	-0.150436	0.666078	-0.372105	0.207445	0.119415	1.16983	1.27165	-1.71907
DHCR24	yes	no	no	no	no	1.7184	1.03256	-0.458522	0.338071	-2.16623	1.11527	0.701662	-0.739687	0.130394	-1.7881	1.67252	0.990636	-0.653547	0.473922	-2.61413
WRAP73	no	no	no	yes	no	-0.540412	-0.342057	1.56813	-0.586527	-1.71906	-0.954417	0.760686	-1.818	-0.814874	-1.18259	-0.15131	1.33196	1.83121	1.2538	-0.956621
RNF19B	no	no	no	yes	no	-1.23771	-2.38981	0.290879	-1.09164	1.30771	-1.52424	-1.77216	0.835343	-0.330997	0.878888	-0.728905	-0.505705	-0.334486	-0.0728788	-0.646701
SLC35D1	no	no	no	yes	no	2.29778	-1.12169	0.1849	0.363001	0.147434	-1.12169	0.963581	0.750605	-1.12169	-0.184391	-0.0540118	-1.12169	0.169293	-0.0121268	1.1169
GADD45A	no	no	no	yes	no	-1.4792	-1.95205	1.54866	-1.566	0.415086	-0.888495	-1.39795	0.4027	-0.992158	0.974449	-0.273673	-0.700004	2.3434	0.0140285	1.38896
SLAMF1	no	yes	no	no	no	-0.182574	-0.182574	-0.182574	-0.182574	-0.182574	-0.182574	-0.182574	-0.182574	-0.182574	-0.182574	-0.182574	-0.182574	-0.182574	-0.182574	-0.182574
UAP1	yes	no	no	no	no	1.66339	1.60926	-0.454362	0.951547	-1.19543	1.58149	1.62546	-0.338126	0.596612	-2.02243	1.34272	1.01805	-0.754315	0.828652	-1.16193
SLC19A2	no	no	no	yes	no	1.48299	1.55263	0.0650203	1.21248	-0.68675	1.87864	1.4814	0.597193	1.04298	-2.08861	1.22055	0.00246843	-0.52584	0.704891	-0.724427
F3	no	yes	no	no	no	2.97598	-0.43243	-0.43243	-0.43243	-0.43243	-0.43243	1.69674	2.11038	-0.43243	-0.43243	-0.43243	2.1256	-0.43243	-0.43243	1.90206
NEK2	no	no	yes	no	no	1.60504	1.29087	-0.88733	1.62834	0.756664	1.08702	1.02138	-0.500246	1.24566	-0.0317283	1.35517	0.99257	-0.832019	1.67754	0.267141
CTSD	no	no	no	yes	no	-1.62892	-1.02954	0.959954	-1.23227	-0.201985	-1.67914	-1.51414	-0.372618	-1.64618	1.092	-1.07166	-0.858239	1.26254	-1.00034	-0.760855
SGK1	yes	no	no	no	no	1.86129	2.09873	-0.342816	-0.121147	-1.54092	1.1493	0.160941	0.010828	-0.609754	-0.950823	1.64426	1.39941	-2.40795	-0.173841	-0.12988
VAMP8	no	no	no	yes	no	-0.86693	-0.829876	2.27332	-0.568928	-0.382492	-2.33296	-0.688377	-1.97434	-1.29523	0.711441	-0.159829	0.221838	1.45922	0.820107	-0.443846
FOXO3	no	no	no	yes	no	-0.78271	-0.979304	0.506403	-0.692851	1.51814	0.355266	-0.620193	1.69623	-0.631862	1.99175	-1.08398	-0.99369	0.298928	-1.2316	2.46506
CCND2	no	no	no	yes	no	-1.17772	-1.17772	-0.0676978	1.26741	1.64324	-1.17772	-1.17772	0.412899	-0.128925	1.13219	-0.270667	-1.17772	0.565302	0.355456	0.30118
ELL2	yes	no	no	no	yes	1.44722	1.3353	-0.811373	0.585014	-1.72139	1.44505	1.27045	-0.824055	0.424115	-2.04883	1.38857	0.7388	-1.06741	0.528699	-1.81531
CSF3R	no	yes	no	no	no	-0.846694	1.37746	1.45047	0.456816	1.4008	-0.846694	-0.846694	-0.846694	-0.846694	1.54046	0.686577	0.176604	0.954618	0.127467	1.11871
ZC2HC1C	no	no	yes	no	no	-0.85428	1.18356	-0.156947	-0.874113	1.14368	0.531687	-1.31552	-1.56942	-0.195305	0.952326	-0.473332	0.610318	0.75793	-0.861892	0.638805
IDE	no	no	yes	no	no	-0.132882	0.0256661	-1.98551	0.271932	0.238317	0.0845662	0.954464	1.01223	-0.716727	-1.9626	-1.01783	-0.82491	-2.26957	-1.76157	0.382573
ELOVL3	no	no	yes	no	no	-0.625182	-0.625182	-0.625182	-0.625182	2.41703	-0.625182	1.79459	-0.625182	-0.625182	-0.625182	0.980908	-0.625182	1.31682	1.04391	-0.625182
APAF1	no	no	no	yes	no	-0.689981	0.793766	-1.29699	-0.526142	1.59533	0.212625	0.351795	-0.402957	-1.02051	-1.79514	-0.968031	-1.72788	-0.113113	-0.888599	0.903671
PTK2B	yes	no	no	no	no	0.277054	-0.664649	0.508592	-1.17165	-2.12697	-0.726404	-1.23448	-1.06028	-0.22526	1.18487	1.24272	1.46081	0.914016	1.67592	-1.77091
CHRNA2	no	no	no	no	yes	0.840495	0.825682	-0.886802	0.328652	-2.60392	0.802633	0.649983	-0.606046	0.264147	-2.20501	1.02155	0.466326	-0.69146	0.258108	-2.70655
COIL	no	no	yes	no	no	1.96112	1.11639	0.395282	1.38652	-0.348846	1.77192	1.53879	-0.340394	1.18533	-0.491013	0.480276	1.29128	-0.880141	1.33341	-0.397904
NCAPH	no	no	yes	no	no	1.49205	1.36569	-0.160751	1.32787	-1.03284	1.3836	1.28965	-0.523348	1.07405	-1.50353	1.27499	1.61092	-0.486199	1.68754	-1.26777
CCRL2	no	yes	no	no	no	1.4754	-0.666667	-0.666667	-0.666667	2.12281	0.685898	-0.666667	0.931405	-0.666667	1.48719	-0.666667	-0.666667	1.11401	-0.666667	-0.666667
TNFSF10	no	yes	no	no	no	-1.34129	1.56072	-0.782252	-0.530269	0.192131	-0.338685	-0.768563	0.354907	0.131358	-0.086716	0.739124	0.673963	-0.8047	0.563025	-0.179821
ACVR2A	no	yes	no	no	no	0.00123024	0.298764	-2.39409	1.18653	1.23482	0.341007	0.675901	-0.128905	0.675633	-0.382507	-0.233117	-0.906798	-2.49844	-0.193426	1.67085
INHBA	no	yes	no	no	no	-0.416555	-0.416555	-0.416555	-0.416555	2.44872	-0.416555	-0.416555	2.2361	-0.416555	-0.416555	-0.416555	-0.416555	3.25713	-0.416555	-0.416555
ARL4A	no	no	yes	no	no	0.341769	-0.21611	0.396561	1.90861	0.0734804	0.24943	1.77492	-1.55453	1.68168	-0.26419	1.13229	0.155783	-1.33968	0.594106	1.03323
WWP1	no	no	no	yes	no	-0.610168	0.400592	-0.785453	0.344786	0.675247	0.839235	0.43801	0.821377	-0.216934	-1.14654	-1.46695	-0.850636	-1.60734	-0.888939	1.98633
IL13RA2	no	no	yes	no	no	-0.309466	-0.309466	-0.309466	-0.309466	-0.309466	1.87255	-0.309466	2.26862	-0.309466	-0.309466	-0.309466	-0.309466	-0.309466	-0.309466	-0.309466
NMI	no	yes	no	no	no	0.485014	-1.12454	-1.12454	-1.12454	1.52857	-0.108222	-0.119081	0.076252	-1.12454	-0.153106	-1.12454	0.82579	0.213458	1.68613	1.60376
KCNJ2	no	yes	no	no	no	1.28177	1.92487	-0.513808	0.407112	-0.44267	0.394148	0.15907	0.0119599	2.03316	-1.72366	0.445426	-0.169165	-0.888864	-0.616964	-1.25736
MXD4	no	no	no	yes	no	-1.84138	-1.30438	0.818005	-1.65997	-1.01025	-1.26501	-1.14356	-0.118299	-0.72537	0.617271	-0.732358	-1.03694	0.0101084	-0.731492	-0.803061
ACSL3	yes	no	no	no	no	2.04302	1.63866	-0.909231	0.618376	-0.866615	1.93188	1.61415	-0.424177	0.538103	-1.40247	1.90499	1.16291	-0.673835	0.566504	-0.950869
PMEPA1	yes	no	no	no	no	1.14556	0.838465	-0.681783	0.254469	-1.82413	0.969854	0.74596	-0.505671	0.246743	-1.87918	1.15094	0.698708	-0.379826	0.336446	-2.1775
NDP	no	yes	no	no	no	0.0348131	0.949717	-0.805333	-0.667831	1.16738	0.104295	0.543616	1.33144	-1.81409	0.492542	0.223678	-1.81409	-0.817383	0.534398	1.32162
CRISP2	no	no	yes	no	no	-0.182574	-0.182574	-0.182574	-0.182574	-0.182574	-0.182574	-0.182574	-0.182574	-0.182574	-0.182574	5.29465	-0.182574	-0.182574	-0.182574	-0.182574
SPDEF	yes	no	no	no	no	1.39848	1.34433	0.425133	0.658418	-1.1588	1.28711	1.12282	-0.388455	0.566108	-0.839463	2.03181	1.60615	0.291271	1.17866	-1.73212
TCP11	no	no	yes	no	no	-0.486538	-0.486538	-0.486538	-0.486538	-0.486538	-0.486538	-0.486538	-0.486538	-0.486538	-0.486538	-0.486538	-0.486538	-0.486538	-0.486538	-0.486538
CDKN1A	no	yes	no	yes	no	-1.5362	-1.30881	1.37628	-1.16776	0.554406	-1.96096	-1.43114	-0.595001	-1.29798	0.800435	-1.16944	-1.22709	0.277772	-1.00046	0.0825495
CXCL6	no	yes	no	no	no	-0.182574	-0.182574	-0.182574	-0.182574	-0.182574	-0.182574	-0.182574	-0.182574	-0.182574	-0.182574	-0.182574	-0.182574	-0.182574	-0.182574	-0.182574
EREG	no	yes	no	no	no	-0.26048	-0.26048	-0.26048	-0.26048	-0.26048	-0.26048	-0.26048	-0.26048	-0.26048	-0.26048	-0.26048	-0.26048	-0.26048	-0.26048	-0.26048
ABCC4	yes	no	no	no	no	1.58494	1.32567	-0.646479	0.46925	-1.9939	1.34259	1.26358	-0.288252	0.308162	-2.64565	1.14074	0.82063	-0.848772	0.234378	-2.05807
IRF1	no	yes	no	no	no	-1.60111	-1.44533	1.06044	0.427251	1.11067	-0.458229	-1.1455	1.27984	-0.735968	2.36531	-1.57591	-0.87648	0.841459	-0.935994	1.67061
PTGER2	no	yes	no	no	no	-0.472812	-0.472812	-0.472812	-0.472812	-0.472812	-0.472812	-0.472812	-0.472812	1.9472	-0.472812	-0.472812	1.84413	-0.472812	1.75896	-0.472812
IL1B	no	yes	no	no	no	-0.885893	-0.885893	1.71215	-0.885893	0.3743	0.0878125	0.0774089	0.973224	-0.885893	1.50292	-0.885893	0.271434	1.15135	-0.885893	0.170299
TNFSF9	no	yes	no	yes	no	-1.56167	-0.222378	0.411813	-0.833782	0.513216	-0.889752	-1.32275	1.76742	-1.58613	1.83915	-0.469965	0.902129	0.132319	-1.02536	-0.584447
CD70	no	yes	no	no	no	1.19139	-0.762591	-0.762591	-0.762591	1.78195	0.471206	-0.762591	-0.762591	-0.762591	0.416718	-0.762591	-0.762591	1.81883	1.50805	-0.762591
BMP2	no	no	no	yes	no	-0.525706	-0.525706	-0.525706	-0.525706	-0.525706	-0.525706	1.15113	1.4769	-0.525706	-0.525706	-0.525706	-0.525706	-0.525706	1.39214	-0.525706
FFAR2	no	yes	no	no	no	-1.64542	-1.1354	0.999442	0.31629	1.06111	-0.95227	-0.535211	0.621705	-0.400948	1.78354	0.292913	-0.711152	1.11561	0.149454	1.67001
CCR7	no	yes	no	no	no	0.12763	-1.25872	-0.0923344	0.0666538	1.70547	1.48603	0.177258	0.412664	-0.15667	1.16847	-1.25872	-1.25872	-1.25872	0.805264	-0.309181
HSPA2	no	no	yes	no	no	0.820362	-2.88051	1.55684	-1.42645	-1.63757	0.363699	0.110297	-0.142857	1.05702	-0.892122	0.534025	0.196288	-0.341051	1.1884	0.289008
STEAP4	yes	no	no	no	yes	1.44103	1.13131	-1.59449	-0.00315097	-2.04324	1.20151	1.13321	-1.35538	-0.0504372	-1.57884	1.56346	0.298431	-1.30333	0.488947	-1.62518
LIF	no	yes	no	yes	no	-1.6444	-0.648349	0.87097	-0.249403	-2.02149	-0.634922	-0.376118	0.116855	-0.329659	-0.869982	-0.241339	-1.3976	0.0973019	-0.768773	-1.67629
DNAJB9	yes	no	no	no	no	-0.302367	-0.143231	1.19081	-0.101545	2.25019	0.695834	0.36816	0.990624	0.730751	0.885984	-0.663307	-0.540738	0.774933	-0.696519	2.36135
GAD1	no	no	yes	no	no	-3.29435	-0.814522	0.345775	-0.53709	0.0770568	-0.893344	-0.266956	1.03342	-0.857024	0.481246	-0.841184	0.142035	0.904334	0.139898	-1.30055
SPCS3	yes	no	no	no	no	1.57605	1.46102	0.534196	0.92236	1.26774	1.85029	1.41901	1.12871	0.861497	-1.23768	0.0245678	-0.301204	-0.391087	0.0279806	1.50627
KLK8	no	no	no	yes	no	-0.182574	-0.182574	-0.182574	-0.182574	-0.182574	-0.182574	-0.182574	-0.182574	-0.182574	-0.182574	-0.182574	-0.182574	5.29465	-0.182574	-0.182574
PARP2	no	no	yes	no	no	1.95003	1.25902	0.108612	0.943887	-0.729175	1.00589	1.59632	-0.211986	0.43373	-1.12588	1.78732	1.63123	-0.112845	1.62977	-1.05539
RHBDF2	no	no	no	yes	no	1.02848	0.402915	-0.616291	0.427411	-2.0872	0.0969329	0.910587	-0.0433587	0.720856	-1.51588	1.293	1.21961	-0.356102	0.7948	-2.88669
FGF13	no	no	no	yes	no	-2.22054	-0.922575	0.0860401	-0.362414	1.73946	-0.752306	-1.09225	0.178829	-0.637183	1.49065	-1.79496	-0.896626	-0.138935	0.0113444	1.90923
TNNI3	no	no	yes	no	no	3.08073	-0.550781	-0.550781	1.70064	-0.550781	0.936233	0.920344	-0.550781	-0.550781	-0.550781	2.09748	-0.550781	-0.550781	1.13179	1.0622
SAT1	yes	no	no	yes	no	0.600481	0.64416	-0.0849463	0.333072	1.62081	0.337462	0.752858	-1.36872	-0.538321	0.937304	1.22634	0.639508	0.194302	-0.08004	1.61609
LDLR	no	yes	no	no	no	1.23984	0.948483	0.00461951	0.714668	0.675671	1.17647	1.0245	0.0414083	0.763013	1.22597	1.41644	1.08536	0.300883	0.997229	0.530509
RPL36	no	no	no	yes	no	-0.433016	-0.386542	2.95304	-0.168205	-0.549399	-1.39737	-0.308094	-2.21801	-1.13838	0.483858	0.893608	0.799925	1.94184	0.992267	-0.967043
BST2	no	yes	no	no	no	1.43367	-1.26966	-2.7495	-1.54298	-0.320023	-0.0746994	-0.101191	0.0896756	0.524398	0.776004	-0.748071	1.19583	-0.690424	-0.317241	0.362679
HBZ	no	no	yes	no	no	0.587187	-0.924749	1.05667	-0.182571	0.10877	0.388117	-1.72084	-1.50393	-1.41656	1.32958	0.575789	0.778281	0.630785	-0.176408	0.567326
ADRM1	yes	yes	no	no	no	-0.524723	-0.588129	1.81539	-0.422301	-1.5718	-0.853615	-0.288358	-1.66494	-0.291156	-0.759182	0.290122	0.478175	1.13823	0.455603	-2.26493
AKAP12	yes	no	no	no	no	1.02881	1.2887	-0.969729	0.255378	-2.47989	1.28237	0.886832	-0.215245	0.347639	-1.63735	1.29065	0.624097	-0.736488	0.069628	-1.82194
NINJ1	no	no	no	yes	no	-0.730393	0.27338	2.61088	-0.395692	0.558978	-1.40483	-0.674703	-0.806507	0.16969	1.23778	0.477242	0.687154	1.49007	1.10194	-0.22408
SELENOS	no	yes	no	no	no	-0.668985	0.81517	2.89924	-0.494156	0.790508	-0.652618	-0.475252	-0.2347	-0.812456	1.47408	0.160675	-0.291643	0.994099	0.94356	1.00938
GCH1	no	yes	no	no	no	-1.53235	0.584184	-1.00746	-0.938475	1.14347	-0.599893	0.330134	0.701762	0.810341	-1.12098	-1.7254	-1.81757	-0.767686	-0.233697	0.192916
SPATA6	no	no	yes	no	no	-1.89782	-1.5738	0.362245	-1.07348	1.42928	-1.25361	-0.87418	1.04	-0.847723	0.928291	-1.4699	-1.22912	0.091738	-0.912898	1.94965
CCT6B	no	no	yes	no	no	-0.735287	-0.29376	1.59964	-1.12075	2.2407	-0.895519	-0.54248	0.553803	0.688919	0.146658	-1.83335	-0.939537	-0.718904	-0.688723	1.81225
RAF1	no	yes	no	no	no	1.61631	0.628817	-0.892147	0.00296565	-1.57777	0.242074	0.169253	-1.67591	-0.534474	-1.99335	1.62513	1.46173	-0.897971	0.718565	-2.08927
RRP8	no	no	no	yes	no	0.761648	1.25063	-0.757617	0.378904	-2.42304	0.360118	0.353871	-1.24239	0.691059	-1.97677	0.171475	0.827808	0.167163	0.422203	-2.41279
PTPRE	no	yes	no	yes	no	-0.462451	-1.04769	-0.800518	-1.0865	0.573873	-1.19414	-1.05184	0.818591	-0.612932	0.41452	-0.865217	-1.68482	0.0769701	-2.05764	1.36142
ITGB4	no	no	no	yes	no	-1.02706	-0.488781	0.0882305	-1.96425	1.49983	-1.69944	-1.3393	0.827819	-0.0712426	2.06733	-1.61632	-0.84367	0.196604	0.110152	-0.282189
PCNA	no	no	no	yes	no	1.36316	1.44293	0.673469	1.47966	-1.25016	1.30586	1.44577	-0.266618	1.21448	-1.73074	1.28431	1.31726	-0.257221	1.52066	-1.11024
CCNA1	no	no	yes	no	no	-0.830398	2.21112	-0.830398	0.820403	-0.830398	1.17527	0.320781	-0.00125323	0.0530806	-0.159624	-0.830398	0.00370704	0.0934873	1.11036	-0.830398
BTG1	no	no	no	yes	no	0.828154	1.40962	-1.6739	0.458208	-0.474557	1.155	0.554511	-1.1254	0.652225	-2.48687	-0.0823092	-0.41598	-1.85709	0.509547	-1.24841
IRAK2	no	yes	no	no	no	-0.439247	-1.93569	2.20349	0.0388056	-0.536288	0.0168591	0.371859	0.214007	-0.641255	-0.369609	0.308337	-0.578325	1.16083	-1.09433	0.0611689
GSTM3	no	no	yes	no	no	-0.518171	-0.152824	3.75823	0.909636	-0.332775	-1.07528	0.372652	-1.00584	-0.570334	0.404627	0.244525	1.01905	0.854626	2.02882	-0.870525
SLC38A2	yes	no	no	no	no	-0.107517	0.667756	0.261337	0.514971	2.14163	0.90182	0.494638	1.29235	0.565901	0.467159	-0.666805	-0.637023	-0.572882	-0.536436	2.45773
LPIN1	no	no	yes	no	no	0.502321	0.172563	0.238228	-0.654598	1.98861	0.206744	0.200565	1.18852	-0.276363	2.30237	0.341114	0.354502	0.964528	0.0324538	2.10974
IL15RA	no	yes	no	no	no	0.770606	-3.06058	1.2357	-0.220478	-2.00068	-0.787804	-0.683024	-0.415167	-1.2239	-0.474379	-0.10979	-0.00134765	0.0215611	0.391834	-1.33929
DDB2	no	no	no	yes	no	0.831731	0.823552	0.0513299	1.39964	-0.975821	0.413658	0.896203	-1.74751	0.259945	-1.11613	1.31199	1.41925	-0.0203054	1.38299	-3.08228
DSC1	no	no	no	no	yes	1.29953	0.7884	-0.565482	0.326818	-1.96609	1.27148	1.06256	-1.15285	0.264399	-2.64412	1.05841	0.508719	-0.457068	0.494565	-2.08547
APLNR	no	yes	no	no	no	-0.372229	-0.372229	-0.372229	-0.372229	-0.372229	-0.372229	-0.372229	-0.372229	-0.372229	2.2115	-0.372229	3.59935	-0.372229	-0.372229	-0.372229
ERCC5	no	no	no	yes	no	-1.79073	-1.37091	-0.498132	-2.00222	0.680575	-0.969886	-1.59993	0.590654	-1.33792	0.446618	-0.631999	-0.443789	0.154173	-0.030685	0.14304
ACRV1	no	no	yes	no	no	-0.0287399	-0.793467	-1.93993	-0.208827	0.34967	-0.498018	-1.1426	0.969733	-0.915225	0.754282	0.149331	-2.57601	-0.475118	0.369638	0.787532
P2RX4	no	yes	no	no	no	-1.15808	-0.561973	1.98053	0.174806	0.0887868	-2.25582	-0.94264	0.0292925	-0.351448	2.11849	-1.44601	-1.00067	1.11265	-0.564233	0.781423
TRAFD1	no	no	no	yes	no	-0.594338	-1.61492	0.978709	-0.763239	0.0345851	-0.769163	-1.49356	-1.5805	-0.621557	2.13799	-0.136012	-0.243226	0.0251816	0.127844	-0.250794
UGT2B28	no	no	no	no	yes	2.10977	0.497023	-1.16931	0.542496	-0.591458	1.4849	1.13437	-1.09523	0.434799	-1.16407	1.89697	0.817831	-2.54846	0.323965	-0.700271
GLS2	no	no	no	yes	no	-0.658658	-1.33349	1.17433	-1.45907	-1.28482	-1.53131	-1.07583	-1.49968	-0.375224	0.0028176	-1.26171	0.0454955	0.195353	0.822057	0.0824004
ACVR1B	no	yes	no	yes	no	-0.743472	-0.763379	0.362353	-0.474372	-0.450252	-0.196048	-1.08166	1.12734	-1.25535	1.76369	-1.6267	-0.190004	0.980365	-0.489152	-0.0425119
MAP7	yes	no	yes	no	no	-0.216557	0.119549	-0.364971	0.394487	-3.06138	1.29644	0.507868	0.910838	0.531843	-0.796085	0.840808	-0.196861	-0.410456	-0.636655	-1.08622
MDM2	no	no	no	yes	no	-0.313633	-0.0260621	-1.43536	-0.512269	0.633169	0.54789	-0.122276	0.0111062	-0.467176	-1.66966	-1.49361	-1.30796	-2.23566	-1.777	0.93056
ISCU	no	no	no	yes	no	-0.311624	-0.6248	1.81121	0.129644	1.81385	-0.696325	0.370618	-0.740796	-0.0929025	0.804288	0.155496	0.00586111	0.908523	0.780866	2.73495
DRAM1	no	no	no	yes	no	-0.415461	-1.00156	0.380862	0.495067	1.04208	0.00478523	-0.298737	0.679159	0.455796	-0.07646	-1.90637	-1.19131	0.662079	-1.01536	1.09371
NUDT15	no	no	no	yes	no	0.902802	1.80771	0.293685	1.3191	-0.291366	2.31186	1.1992	-0.399717	1.41817	-1.5526	0.844836	1.21294	-0.634063	1.10078	-0.414777
TNS3	no	no	no	no	yes	1.65342	1.25336	-0.974359	0.499112	-1.97829	1.26102	1.16519	-0.698048	0.812864	-1.13262	1.53204	1.00976	-1.10933	0.578357	-2.07902
IL6	no	yes	no	no	no	-0.182574	-0.182574	-0.182574	-0.182574	-0.182574	-0.182574	-0.182574	-0.182574	-0.182574	-0.182574	-0.182574	-0.182574	-0.182574	-0.182574	-0.182574
RTP4	no	yes	no	no	no	-0.260431	-0.260431	-0.260431	-0.260431	-0.260431	-0.260431	-0.260431	-0.260431	-0.260431	-0.260431	-0.260431	-0.260431	-0.260431	3.13915	-0.260431
ABI1	no	yes	no	no	no	-1.26385	-0.134108	-0.563892	-1.45143	0.628227	-0.307323	-1.31569	0.0598414	0.492977	-2.24834	-1.02209	-0.343677	-1.86221	-0.46562	0.593201
KLF4	no	no	no	yes	no	1.11553	0.427023	0.0944435	-1.64151	-1.52778	0.645034	-0.880738	-1.13079	0.640856	-1.34173	1.00787	0.229881	-0.427447	-0.743601	-0.358549
SLC31A2	no	yes	no	no	no	0.0426761	0.972916	1.31116	0.205512	0.929791	-0.144802	0.337686	-0.187526	1.61045	-1.24599	-1.07842	-2.23697	0.731748	0.36353	0.243222
SLC31A1	no	yes	no	no	no	-0.146223	-0.102261	1.26538	-0.0532904	2.13896	0.0323637	-0.0937078	1.20938	-0.174731	1.76618	-0.465972	-0.169982	1.19912	-0.136409	2.31651
MYC	no	yes	no	no	no	0.7175	1.00861	0.998719	0.269351	-1.96725	0.192793	0.515941	0.238339	0.454015	-2.04532	1.12947	1.34352	0.866981	0.932772	-3.10517
DMRT1	no	no	yes	no	no	-0.634278	1.6056	-0.634278	1.36682	2.0915	-0.634278	-0.634278	0.927303	-0.634278	1.4704	-0.634278	-0.634278	-0.634278	-0.634278	1.71199
IER3	no	no	no	yes	no	1.04414	-0.753239	1.64544	0.965081	-0.753239	-0.753239	-0.753239	-0.753239	-0.753239	-0.753239	-0.753239	1.42468	-0.753239	0.530925	0.477818
RNF144B	no	yes	no	no	no	-0.74309	-0.784112	0.478736	-0.809341	2.07163	-1.13489	-1.19097	0.815091	0.0301225	1.73543	-0.924812	-0.779553	0.308676	-1.34576	2.27253
TLR2	no	yes	no	no	no	-0.703069	0.866087	-0.703069	-0.703069	-0.703069	-0.703069	-0.703069	-0.703069	2.05559	-0.703069	-0.703069	-0.703069	-0.703069	-0.703069	1.41065
CASP1	no	no	no	yes	no	-0.323807	-0.323807	-0.323807	-0.323807	-0.323807	-0.323807	-0.323807	2.70077	-0.323807	-0.323807	2.46342	-0.323807	-0.323807	-0.323807	-0.323807
SLC28A2	no	yes	no	no	no	0.175936	-1.07679	-0.0228268	-1.07679	-1.07679	-1.07679	-1.07679	-1.07679	0.945569	0.863803	-0.215545	-0.136614	-1.07679	-1.07679	-0.218773
CLCA2	no	no	no	yes	no	0.689201	-1.01521	0.654336	-0.389851	-1.39605	-0.217188	0.334619	0.922573	0.206433	0.00989649	0.51896	-1.49651	0.911143	-1.55078	-0.455933
ZNF365	no	no	no	yes	no	-0.413015	-0.893518	0.663166	-1.10587	0.961173	-1.88372	-0.345434	-0.536411	-0.22744	0.6481	-1.61851	-1.38212	-0.150675	-1.03098	1.46106
ITGAV	yes	no	no	no	no	1.00652	1.06171	-3.0364	-0.0529136	1.75858	0.443158	0.543964	0.667197	-0.658974	-0.877647	-0.0412055	0.287071	-0.391841	-0.982388	2.08539
HERC3	yes	no	no	no	no	0.751496	0.653865	-1.01756	-0.0425225	-2.46611	0.728773	0.629415	-0.285844	-0.0524524	-2.78234	0.640101	0.20923	-0.899011	-0.204986	-2.37847
BMPR1B	yes	no	no	no	yes	1.02379	1.07719	-1.07794	0.235825	-1.72463	1.18999	0.97429	-1.093	0.174423	-2.27198	1.10656	0.443574	-1.30013	-0.0948856	-2.07232
CXCL9	no	yes	no	no	no	-0.496316	-0.496316	-0.496316	1.40756	-0.496316	-0.496316	-0.496316	-0.496316	1.08676	-0.496316	-0.496316	-0.496316	-0.496316	-0.496316	0.867678
SLC38A4	no	no	no	no	yes	1.32093	0.962812	-1.08558	0.822385	-2.08235	1.27472	1.14431	-0.749997	0.562171	-2.07681	1.25443	0.684678	-1.01445	0.463235	-2.28298
SLC7A1	no	yes	no	no	no	0.437523	0.0683794	0.821041	0.207362	1.55849	0.268389	-0.121667	1.42133	0.110672	1.72462	-0.108084	-0.0317545	1.13177	0.117959	1.17576
RB1	no	no	no	yes	no	0.189516	1.05449	-1.45174	1.37019	1.31393	1.60613	1.31568	0.194037	0.986863	-1.45147	-0.0315405	-0.891126	-1.75906	0.261262	1.80676
SORD	yes	no	no	no	no	1.23312	0.832328	0.295562	0.360182	-2.17147	0.672004	0.897852	-0.693496	0.469981	-2.62767	1.36015	0.780152	-0.097388	0.740889	-2.61875
ABHD2	yes	no	no	no	no	1.5933	1.28436	-0.591176	0.320555	-2.06391	1.38866	0.862992	0.110771	0.312544	-2.64065	1.09122	0.648797	-0.570533	-0.0964716	-2.48485
CDH13	no	no	no	yes	no	-0.255639	-0.255639	-0.255639	2.69789	-0.255639	-0.255639	-0.255639	-0.255639	-0.255639	-0.255639	-0.255639	-0.255639	-0.255639	-0.255639	-0.255639
OSGIN1	no	no	no	yes	no	-0.945441	-1.77444	0.753206	-1.46166	-1.25668	-1.28737	-1.21281	-0.706026	-1.46108	0.561295	-0.758497	-1.42233	-0.0380658	-0.771545	-0.482265
DPEP3	no	no	yes	no	no	-0.45338	-0.45338	-0.45338	-0.45338	1.47108	-0.45338	-0.45338	-0.45338	-0.45338	3.66956	-0.45338	-0.45338	-0.45338	-0.45338	-0.45338
TOB1	no	no	no	yes	no	-0.797786	-1.08997	1.38039	-0.256929	2.25248	-1.37463	-1.40895	-0.214012	-0.821107	1.80072	-1.51588	-1.19509	0.0698183	-0.470471	1.50857
ADCYAP1	no	no	yes	no	no	-0.32558	-0.32558	-0.32558	-0.32558	-0.32558	-0.32558	-0.32558	-0.32558	-0.32558	-0.32558	-0.32558	-0.32558	-0.32558	-0.32558	-0.32558
MEP1B	no	no	yes	no	no	0.555519	-0.088494	-0.400655	0.478146	1.36892	0.634597	-0.135295	1.201	1.01844	0.235234	-1.54872	-0.524602	0.254041	0.482852	-0.614097
PIK3R5	no	yes	no	no	no	-0.772638	0.0940047	-0.990475	0.786421	0.117504	-0.286682	1.53909	0.871959	0.737808	0.258138	0.187819	-0.0235503	1.30269	0.251905	-1.20522
TP53	no	no	no	yes	no	-1.21882	-0.919775	1.50258	0.765779	1.17475	-1.59868	-1.53426	-0.0773995	-0.651839	1.30194	-0.824317	0.215466	1.56352	0.64569	-0.159503
IFNAR1	no	yes	no	no	no	0.671482	1.50503	-0.597188	0.732354	1.59397	1.75299	1.16388	0.2587	1.35897	-2.1515	-1.12798	-0.426273	-1.86716	-1.25088	1.33464
APP	no	no	no	yes	no	0.166863	-0.243471	-0.198456	-0.85411	-3.16628	0.80015	-0.0468245	0.968848	-0.0185083	0.406787	0.418016	0.10338	0.437891	-0.205406	-0.457853
AKT1	yes	no	no	no	no	-0.382058	-0.497263	0.639761	0.0938872	-2.74278	-0.343025	-0.0449583	-1.20693	0.613877	-0.249563	0.40112	0.158626	0.168014	0.571293	-2.10824
EMP3	no	yes	no	no	no	0.108388	0.207447	1.21594	-0.136516	-1.22824	0.0764943	0.166545	1.9214	-1.09482	0.00221519	-0.682411	-0.452344	0.0664231	-1.88675	0.884889
KLK3	yes	no	no	no	yes	1.09462	0.993432	-0.106383	0.48691	-2.27577	0.90809	0.923587	-0.29304	0.469197	-2.45491	1.27769	0.905743	-0.0828829	0.526742	-2.68841
SLC2A5	no	no	yes	no	no	-1.24319	0.783272	0.849795	-1.24319	0.374562	-1.24319	0.42488	0.668227	-0.255658	0.380892	0.552686	-1.24319	0.398014	-1.24319	0.547525
EPHA2	no	no	no	yes	no	0.259343	-1.29223	-1.03769	-0.455859	-0.70681	-1.85975	-2.34343	0.336659	-1.26946	0.598029	-0.632336	-0.523399	1.02184	0.0142028	-1.26295
KIF2C	no	no	yes	no	no	1.40675	1.34482	0.379636	1.35677	0.0444055	1.07371	1.31445	-0.389942	1.37097	-0.237127	1.3158	1.59978	0.0248065	1.70805	-0.635621
RGS16	no	yes	no	yes	no	0.306937	0.15045	0.744617	-0.0341534	-1.45979	-0.398001	0.140648	0.582761	0.310833	2.16565	-0.415709	-0.296639	0.455409	-0.298748	1.20702
OAZ3	no	no	yes	no	no	-0.81663	-2.16415	3.18503	0.186902	-0.0349782	-0.821301	-0.124288	-1.21143	-0.63548	0.849805	0.834345	-0.35403	0.437133	0.65411	-0.0699311
EPHX1	no	no	no	yes	no	-1.45455	-1.64161	1.1015	-1.09857	0.567479	-1.81624	-1.8798	-0.203532	-1.50279	1.27206	-1.2477	-0.8965	0.737512	-0.929087	0.15359
TPRKB	no	no	no	yes	no	1.14422	0.807046	1.01915	1.74682	0.820696	1.54531	1.12413	-0.152643	1.79095	-1.51051	0.646728	0.37341	-0.897974	0.935555	0.912778
NPHP1	no	no	yes	no	no	-2.07103	-0.751904	-1.34885	0.238631	1.42827	-1.12204	-0.00651184	-1.1461	-1.70738	0.354633	-1.57421	-0.486918	-0.10173	-0.97112	1.32153
EAF2	no	no	no	no	yes	1.33086	1.67783	-0.573524	0.887031	-1.30749	1.61266	1.47041	-0.612589	0.721509	-1.22834	1.44644	0.736162	-0.768636	0.602404	-0.675253
OSMR	no	yes	no	no	no	0.0706181	-0.971624	-0.924633	-1.98818	1.32199	-0.0918887	-1.04805	-0.325186	-0.9098	0.389951	-1.38586	-1.11009	-0.0558668	-1.45018	1.94178
PLK2	no	no	no	yes	no	0.92151	0.957883	0.129585	0.497243	-0.914897	1.22217	0.852208	-0.267482	0.772021	-1.73208	0.758928	0.546577	-0.372815	0.227721	-1.02507
IQGAP2	yes	no	no	no	no	1.25555	1.25584	-1.03951	0.505178	-2.23757	1.00725	1.23214	-0.144042	0.145654	-2.84936	1.1927	0.857657	-0.782214	0.405386	-1.97772
TNFAIP8	yes	no	no	no	no	1.58107	1.4611	-0.366293	0.469282	-1.25503	1.69149	1.50485	-0.448968	0.582638	-2.04361	1.22878	0.974231	-0.377415	0.580456	-1.5929
TPBG	no	yes	no	no	no	0.546976	-0.0622124	-0.357493	-1.44348	1.03181	-0.0940633	-0.637147	-1.44348	-1.44348	0.556079	-1.44348	-1.44348	-0.370465	1.08481	1.01536
VIP	no	yes	no	no	no	-0.262714	-0.262714	-0.262714	-0.262714	-0.262714	-0.262714	-0.262714	-0.262714	-0.262714	-0.262714	-0.262714	-0.262714	-0.262714	-0.262714	-0.262714
GPC3	no	yes	no	no	no	1.5263	0.993607	0.745328	0.173915	1.931	0.421316	0.253247	0.226989	-0.58209	-0.147239	0.0711661	0.672724	-0.109744	0.950936	0.454328
CDKN2B	no	no	no	yes	no	-0.520807	-0.957347	-0.23727	-1.53895	0.977855	-0.542525	-1.41768	-0.411868	-1.11283	1.5819	-0.611672	-0.998891	1.03885	-0.558753	2.06179
CDKN2A	no	no	no	yes	no	0.381847	-0.259737	2.83505	0.425164	-0.350095	-0.236774	-0.10924	-1.20043	0.348028	-0.378008	0.9526	0.960909	2.092	2.00663	-0.537044
ACTL7B	no	no	yes	no	no	-0.997448	0.378676	0.0844946	-0.997448	-0.997448	1.92054	1.04439	-0.0380525	1.0786	-0.221302	-0.11334	-0.997448	2.02361	-0.0786565	-0.997448
STOM	no	no	no	yes	no	-0.861739	0.234056	-0.524295	-0.528174	0.276504	0.945043	-1.34415	-0.869899	-0.360154	-1.43143	-0.489686	0.0197579	-2.66628	-0.666551	-0.245666
NOTCH1	no	no	no	yes	no	-0.410668	-0.352784	-1.66202	-0.174236	-2.16887	-0.286114	-1.00697	-0.352405	0.136614	-0.317658	-0.374232	-0.481541	-0.658119	-0.552903	-2.23022
ADM	no	yes	no	no	no	0.0834657	-0.700411	0.319195	1.4618	0.513413	-1.52289	-0.841518	-1.34067	-0.864407	1.94796	-0.647858	0.713211	-0.0785484	0.869897	1.81171
ST14	no	no	no	yes	no	0.508271	0.0948061	0.382564	0.479236	-3.22491	0.485073	0.382759	-0.333922	-0.00808119	-0.415824	1.09028	0.984598	0.929139	0.80132	-2.40432
FADS1	yes	no	no	no	no	0.491668	1.07697	0.796134	0.623204	1.87209	0.654934	0.667137	0.937859	0.239154	1.76789	0.859962	0.712627	0.884904	0.446257	1.4343
EI24	no	no	no	yes	no	0.938846	0.833261	0.188683	1.66578	-0.288262	1.3123	1.23155	-1.52492	1.45755	-1.50672	0.862079	1.37855	-1.3843	1.63958	-1.00843
ARID5B	yes	no	no	no	no	2.30222	0.282413	-1.77574	-1.00453	1.257	0.739061	0.0963847	0.473096	-0.997294	0.91829	-0.197947	-0.11044	-0.326683	-1.30574	1.15121
IL18	no	yes	no	no	no	-0.697826	-0.697826	1.63286	-0.697826	1.57643	0.404917	-0.697826	0.605079	1.52397	-0.697826	-0.697826	-0.697826	1.6094	-0.697826	-0.697826
SEC24D	yes	no	no	no	no	0.429674	-0.335964	1.50758	-0.162036	1.80851	-0.602156	-0.104386	1.63479	-0.692562	1.98868	-0.101942	-0.319781	1.20573	-0.446755	2.22661
SLC7A11	no	no	no	yes	no	-0.444509	-0.438261	0.869477	-0.302174	1.72742	-0.408675	-0.313135	1.20969	-0.437402	1.56442	-0.474839	-0.34401	0.982354	-0.460129	1.92589
NGLY1	yes	no	no	no	no	1.43711	1.47085	-0.475305	0.696982	-0.395513	1.14375	1.22216	-1.37816	0.260895	-2.02779	1.15923	0.651257	-2.30785	0.616473	-0.331955
PTPN14	no	no	no	yes	no	-0.338254	-0.103338	-1.3255	0.848579	1.18113	0.262881	-0.550897	1.41572	0.56006	0.757972	-1.47514	-1.43624	-0.895249	-1.47324	1.56808
CAMK4	no	no	yes	no	no	-0.404808	-0.404808	-0.404808	-0.404808	-0.404808	-0.404808	1.5246	-0.404808	-0.404808	-0.404808	-0.404808	-0.404808	-0.404808	0.926046	-0.404808
GPD1L	yes	no	no	no	no	1.12118	1.40849	-0.629395	0.769074	-0.832348	1.70988	0.983133	-0.51436	1.33038	-3.32291	0.228799	-0.667999	-1.46525	0.0346504	-1.32419
DDX4	no	no	yes	no	no	-0.871228	-0.871228	-0.871228	0.613746	0.398139	-0.871228	-0.871228	1.00142	0.363529	0.690611	-0.871228	-0.871228	-0.871228	-0.871228	1.36779
RAD17	no	no	yes	no	no	0.66641	0.777591	0.0826002	0.707752	1.94361	0.998552	0.978708	0.855581	0.880012	-0.173359	-0.903258	-0.399092	-0.709445	-0.133584	2.45876
SRP19	yes	no	no	no	no	0.613498	1.20035	0.176208	0.384416	1.46087	1.77887	0.94432	0.921709	0.754608	-0.528865	-1.01024	-0.998844	-0.914394	-1.42248	2.52876
CLGN	no	no	yes	no	no	1.07814	1.47186	-0.947571	0.596184	-0.116433	0.922889	1.54301	0.882919	-0.457649	-0.49928	1.26192	-0.0583269	0.247237	0.911096	0.887303
MERTK	yes	no	no	no	no	-0.955424	-1.0708	0.07186	-1.12836	1.1013	-1.28122	-0.677012	0.403554	-1.49378	1.29535	-1.1404	-1.83185	0.344849	-0.898019	0.39904
ANKH	yes	no	no	no	no	1.57366	0.733195	-0.227729	0.351164	-2.22492	1.03908	0.485184	0.16614	0.21859	-1.98064	1.63316	0.964305	-0.519227	0.112298	-2.73598
PITPNC1	no	no	no	yes	no	-0.227031	-0.836894	0.288268	-1.47957	1.85101	-0.00479518	-1.72867	-0.780441	-0.881063	1.20742	-2.03603	-0.84581	1.64182	-0.752096	0.851367
ADAMTS1	yes	no	no	no	no	0.437942	-0.0588063	-0.241998	-0.983531	-2.31265	0.478436	-0.0681326	0.00207648	-0.499665	-1.89049	0.189326	-0.479293	-0.623306	-1.26031	-2.25599
XPC	no	no	no	yes	no	0.0662916	-0.368873	-0.440846	-0.11721	-3.69197	0.190443	-0.347072	0.189313	-0.179348	0.280157	0.715673	0.235014	0.0149549	0.248293	-1.15405
ODF1	no	no	yes	no	no	-0.182574	-0.182574	-0.182574	-0.182574	-0.182574	-0.182574	-0.182574	-0.182574	-0.182574	-0.182574	-0.182574	-0.182574	-0.182574	-0.182574	-0.182574
DBI	yes	no	no	no	no	1.58052	1.53268	0.88609	1.07941	-0.220992	1.23108	1.35544	-1.5782	0.591736	-0.475358	1.83582	1.29132	-0.462684	1.4467	-0.404106
TTN	no	no	no	no	yes	1.38418	1.05439	-1.05847	0.267607	-2.12029	1.05206	0.947926	-0.842745	0.206855	-2.24415	1.29772	0.667287	-0.924724	-0.0812356	-2.38921
SLC26A2	yes	no	no	no	no	0.822867	0.898951	-2.51203	0.330694	0.227559	1.66928	1.7509	-0.29676	0.693569	-1.8845	0.0303931	-0.428049	-2.39348	-0.583474	0.0726883
ART3	no	no	yes	no	no	-0.626813	-0.626813	-0.626813	-0.626813	1.84223	-0.626813	-0.626813	-0.626813	-0.626813	-0.626813	-0.626813	-0.626813	-0.626813	-0.626813	1.49846
NAA11	no	no	yes	no	no	0.62406	-1.8323	0.165358	-0.421047	0.428599	0.328208	1.07549	-0.517116	0.358112	0.821694	-2.52172	0.501319	-0.751928	1.2472	0.525027
PHKG2	no	no	yes	no	no	-0.362129	-0.0161573	0.0950973	-0.212664	-1.79953	-0.435865	-0.375323	-2.0153	-0.447857	-0.750327	1.05636	0.70745	0.811058	0.490686	-1.99609
HTR5A	no	no	yes	no	no	-0.379047	-0.379047	-0.379047	-0.379047	-0.379047	-0.379047	-0.379047	-0.379047	-0.379047	-0.379047	-0.379047	-0.379047	2.187	-0.379047	-0.379047
MMP14	no	yes	no	no	no	-0.493341	-0.964537	0.935203	0.706374	-0.000429908	0.763388	0.719031	-1.14368	1.02429	0.704214	0.235384	0.773088	-0.984144	0.869597	-2.44384
CCNB2	no	no	yes	no	no	1.52091	1.39518	-0.269972	1.58214	0.285635	1.34957	1.61919	-0.926328	1.33361	-0.628565	1.21377	1.49252	-0.502618	1.4164	-0.400028
BRAF	no	no	yes	no	no	0.296349	-1.12722	-2.07598	-0.0556503	1.4967	0.355706	-0.157625	0.611148	-0.0860244	-0.803657	-0.932241	-0.699581	-1.42035	-2.54377	1.13417
ELK4	yes	no	no	no	no	1.06078	1.22652	-1.66962	-0.0134506	-0.738153	1.33198	1.29724	0.832766	0.247349	-3.06476	0.0606647	-0.0932001	-1.72655	-1.10556	-0.829179
IFNGR2	no	yes	no	no	no	-1.83719	-1.34571	0.999691	-1.33618	0.868433	-1.33991	-1.78959	-0.325731	-0.569368	0.701236	-1.95112	-1.34576	0.981796	-0.537087	0.649246
TNNI1	no	no	no	yes	no	0.344802	0.460354	0.529732	-0.414453	0.0341061	-0.834988	0.0865831	0.678955	-1.65306	0.615242	-0.762347	-1.65306	-0.576054	-0.147501	-1.65306
BTG2	no	yes	no	yes	no	-1.72194	-0.882626	0.416768	-0.630705	0.718497	-1.51382	-1.5581	-0.428919	-0.363205	0.149368	-1.10388	-1.81915	0.837483	-1.41857	-0.751934
TCHH	no	no	no	yes	no	0.43955	0.02874	1.08943	0.349033	-2.32431	-0.816296	-0.387412	-0.104847	1.41011	-0.438489	1.1138	-2.32431	-1.12518	-1.2937	-1.33632
ACE	no	no	yes	no	no	-0.597307	-0.597307	-0.597307	-0.597307	1.0612	-0.597307	-0.597307	-0.597307	1.98459	-0.597307	0.797951	-0.597307	-0.597307	-0.597307	-0.597307
PTGIR	no	yes	no	no	no	-0.242392	-0.242392	-0.242392	-0.242392	-0.242392	1.92323	-0.242392	-0.242392	-0.242392	-0.242392	-0.242392	-0.242392	-0.242392	4.86375	-0.242392
ICOSLG	no	yes	no	no	no	0.173709	0.0769315	-0.622928	-0.25894	-2.405	-0.233125	-0.011236	-1.02656	0.301043	-1.09461	-0.327372	0.40288	-0.783921	0.613376	-2.46828
RALGDS	no	no	no	yes	no	0.217338	0.276643	-0.746768	-0.616003	-1.92208	0.237332	0.0987041	-1.29929	-0.0719005	-0.555682	1.32086	1.19472	0.382756	1.58131	-2.66085
PRMT2	no	no	no	yes	no	-1.35276	-1.44179	2.09504	-1.09561	-1.04539	-1.6389	-0.678429	0.611679	-0.930491	1.31573	-0.116903	-0.745158	1.33429	-0.339356	0.697972
AZGP1	yes	no	no	no	no	0.0861904	-0.263204	0.971264	-0.934433	-2.24337	0.121603	-0.151877	-1.4537	-1.13044	-1.82346	0.912613	0.178832	0.251041	-0.274979	-2.74415
LY6E	no	yes	no	no	no	0.254566	0.94388	2.09887	0.632596	-1.26603	-0.175469	0.58254	-0.508221	0.235333	-0.460614	1.32662	1.39954	1.86475	1.32002	-2.40658
FDXR	no	no	no	yes	no	-1.14874	-0.945093	1.04683	-0.971198	-2.98306	-1.06	-0.480408	-0.86868	-0.529284	-0.0672124	-0.707318	-0.548921	0.743651	0.58592	-1.28207
ITGA5	no	yes	no	no	no	-0.80633	-1.4552	1.33429	-0.872814	1.76842	-1.79161	-1.43127	0.92388	-1.34569	1.92121	-0.88583	-0.914132	1.34806	-1.0414	1.1677
ALOX15	no	no	yes	no	no	-1.00744	-1.11454	1.5687	-0.616874	0.291063	-2.55259	-0.830626	-0.54269	-0.77482	1.15396	-1.17802	0.0416175	2.27315	-1.13051	-0.675645
CLPB	no	no	yes	no	no	0.974559	0.103894	-0.34762	0.881629	-2.56278	0.30126	0.843355	-1.14154	0.0184287	-0.0577138	1.90767	1.28109	0.433366	1.35843	-2.05523
PDPN	no	yes	no	no	no	-0.182574	-0.182574	-0.182574	-0.182574	-0.182574	-0.182574	-0.182574	-0.182574	-0.182574	-0.182574	-0.182574	-0.182574	-0.182574	-0.182574	-0.182574
GFI1	no	no	yes	no	no	0.158157	0.339847	-1.71421	0.0412437	-0.0266954	-2.20693	-0.377082	1.44513	-0.782488	-0.222208	-0.734158	-0.908274	-1.14315	0.910531	0.276217
NLRP3	no	yes	no	no	no	-0.750512	1.10276	-0.750512	-0.750512	-0.750512	0.343046	1.57495	0.54154	-0.750512	1.51363	-0.750512	-0.750512	-0.750512	-0.750512	0.435685
ATF3	no	no	no	yes	no	-1.00455	-0.6444	1.67698	-0.845106	1.00834	-0.963853	-0.749209	1.04859	-0.767582	1.35183	-0.857917	-0.865155	0.990829	-0.466741	1.10594
IER5	no	no	no	yes	no	0.721123	1.5569	1.04872	0.315296	-1.67521	0.360867	0.880872	-0.600169	1.57233	-0.170781	0.173495	0.731197	0.863232	1.28892	-1.77611
COQ8A	no	no	no	yes	no	1.13785	1.12661	0.980091	0.581083	-1.99614	0.978902	1.25057	0.0752271	0.791602	-1.233	1.47661	1.33534	0.809607	1.01077	-1.82164
INHBB	no	no	no	yes	no	-1.09204	-0.226769	2.30835	-1.34927	1.00888	-1.66188	-0.882161	0.0370908	-0.319737	0.940577	-1.26373	-1.51853	1.4524	-1.01957	-0.0738651
PDLIM5	yes	no	no	no	no	1.60642	1.08711	-0.939082	0.0340905	-2.23604	1.37052	1.21354	-0.708693	0.0604876	-2.56304	1.44707	0.911128	-1.02377	0.0375715	-1.94288
TGFA	no	no	no	yes	no	-0.625402	-0.395902	1.05334	0.979981	0.592568	-2.00464	0.229261	-0.45171	0.22707	0.518568	-0.5293	-1.51977	0.513182	-0.582926	-0.234181
FZD5	no	yes	no	no	no	1.52574	1.44537	-1.49634	0.978919	-1.83771	1.73268	1.07234	-0.654075	0.708182	-1.91934	1.25132	0.898298	-0.90465	0.548006	-1.77446
SLC15A2	no	no	no	no	yes	1.06178	1.20027	-1.18754	0.132297	-2.14831	1.32093	0.981466	-1.05261	0.43362	-2.02298	1.16328	0.649029	-1.53271	-0.0917452	-1.99541
PROK2	no	yes	no	no	no	-0.182574	-0.182574	-0.182574	-0.182574	-0.182574	-0.182574	-0.182574	-0.182574	-0.182574	-0.182574	-0.182574	-0.182574	-0.182574	-0.182574	-0.182574
CCDC141	no	no	no	no	yes	1.43451	1.11121	-0.779754	0.565432	-1.94266	1.20892	1.04701	-0.585825	0.373401	-2.11801	1.38223	0.842873	-0.889217	0.210722	-2.254
RCHY1	no	no	no	yes	no	0.904712	1.44342	0.246295	1.38032	1.14959	1.33945	0.741612	0.438981	1.6371	-0.787524	-0.493776	-0.302818	-1.22805	-0.330299	2.1735
TOPBP1	no	no	yes	no	no	1.54215	1.76438	-0.988651	1.3568	0.105952	1.24583	1.40846	0.293271	1.01248	-1.43266	1.37342	1.38278	-0.600311	1.4137	-0.42198
RFC4	no	no	yes	no	no	1.3546	1.23271	0.372356	1.59192	-0.447266	1.47258	1.58289	0.0543853	1.17949	-0.889577	1.33413	1.3904	-0.158709	1.60449	-0.407794
RPL39L	no	no	yes	no	no	-0.426607	3.25346	-0.426607	-0.426607	-0.426607	-0.426607	1.72168	-0.426607	-0.426607	1.64898	-0.426607	-0.426607	-0.426607	-0.426607	1.92884
SGMS2	no	yes	no	no	no	-0.317434	1.39723	-1.22293	-0.696715	0.600012	0.48454	0.289496	-0.220995	0.643983	-0.896488	-2.17458	0.244142	-2.09059	0.281567	1.80231
HSPA4L	no	no	yes	yes	no	0.930557	1.58442	-1.14716	1.54649	0.677017	1.45683	1.41846	0.404072	1.26677	-1.62414	0.0772017	1.00689	-1.82013	0.69844	0.74254
ADAD1	no	no	yes	no	no	-0.311433	-0.311433	-0.311433	-0.311433	-0.311433	-0.311433	-0.311433	-0.311433	-0.311433	-0.311433	-0.311433	-0.311433	-0.311433	-0.311433	-0.311433
GUCY1A1	yes	no	no	no	no	1.31176	1.12734	-2.13221	-0.0640928	-1.18544	0.465463	0.910593	-0.982115	-0.710508	-2.08598	0.629811	0.868656	-1.67674	0.532342	-0.842331
HPGD	yes	no	no	no	yes	0.96048	0.957155	-1.31041	0.634265	-2.02657	1.13987	0.916101	-0.934592	0.396876	-2.8459	1.0167	0.843378	-0.640093	0.0275028	-2.23151
NPY5R	no	no	yes	no	no	-0.248493	-0.248493	-0.248493	-0.248493	-0.248493	-0.248493	-0.248493	-0.248493	-0.248493	-0.248493	-0.248493	-0.248493	-0.248493	-0.248493	-0.248493
IL15	no	yes	no	no	no	0.0236329	-1.25239	0.450522	1.11243	1.19458	-1.25239	-1.25239	0.285984	-0.238042	-0.482254	-1.25239	0.293793	-0.19165	-0.340714	-0.378416
ANKRA2	no	no	no	yes	no	0.112893	-1.16227	0.286025	-0.626959	1.79624	-0.364081	-0.69016	-0.531269	-0.725384	0.483049	-1.6122	-0.990461	0.888053	-0.666221	1.31124
TLR3	no	yes	no	no	no	-2.75617	-0.82188	0.589474	0.405026	1.34934	-0.165035	-1.2409	0.502657	-0.400978	1.05373	-0.279123	-0.778455	-0.675881	1.19585	1.44027
ABCA1	no	yes	no	no	no	-1.57755	-1.2255	0.0154724	-0.812454	2.13691	-1.86408	-0.254736	0.333265	-0.182229	1.54845	-1.62176	-0.798205	0.627127	0.0558247	1.60241
CYBB	no	yes	no	no	no	-0.42307	2.00747	-0.42307	-0.42307	-0.42307	-0.42307	-0.42307	1.27144	3.24369	-0.42307	-0.42307	-0.42307	-0.42307	-0.42307	-0.42307
STRBP	no	no	yes	no	no	-0.43244	-0.0763075	0.354061	0.171303	2.19136	-0.0350551	0.437439	1.68636	0.52819	1.43915	-0.404284	-0.252455	0.553015	-0.0522533	2.78255
JAM3	no	no	yes	no	no	-1.09134	0.693472	-0.159494	0.339002	0.658191	0.649603	1.1708	0.827897	0.583361	0.0427863	0.564948	1.9232	1.0854	0.80125	1.5249
TMEM100	no	no	no	no	yes	1.52987	1.12442	-0.398445	0.486955	-1.19773	1.29178	1.22714	0.0241682	0.551254	-2.25741	1.44826	0.7936	-0.357203	0.784784	-1.03189
CENPN	yes	no	no	no	no	1.4682	1.34986	-0.481139	0.891835	-1.31506	1.49773	1.40049	-0.726992	0.668694	-1.96535	1.71147	1.19636	-0.540156	0.797157	-1.6266
RRAD	no	no	no	yes	no	-0.71055	0.956333	-2.35423	0.0871964	-0.213774	0.275646	1.12902	1.51961	-2.35423	0.523492	0.439306	0.186255	0.390137	0.0928649	0.43191
BLCAP	no	no	no	yes	no	0.621798	0.975175	0.132877	0.694965	-0.752164	0.985384	1.02956	-1.33295	0.154842	-1.21319	0.434946	0.204307	0.6318	0.681715	-1.698
B2M	yes	no	no	no	no	0.595067	1.47516	1.4042	0.712584	1.46912	1.03906	1.41891	-0.137393	0.503258	-0.360891	0.99501	0.648954	-0.561651	0.959685	1.17599
LDHC	no	no	yes	no	no	-0.68455	-0.68455	-0.68455	-0.68455	-0.68455	-0.68455	0.388105	0.596492	-0.68455	-0.68455	2.59454	1.39612	0.742868	-0.68455	-0.68455
GPR182	no	no	yes	no	no	-0.42637	2.12042	-0.42637	-0.42637	-0.42637	-0.42637	-0.42637	-0.42637	-0.42637	-0.42637	-0.42637	3.25213	1.55206	-0.42637	-0.42637
SCG5	no	no	yes	no	no	-0.691925	0.4782	-2.96894	1.59373	-1.42488	1.31137	0.536209	0.481699	0.64511	0.703436	-0.898998	0.36207	0.381582	-0.0300287	1.19372
NKX3-1	yes	no	no	no	no	1.16609	1.03511	-0.15896	0.617123	-1.82285	1.15528	0.92797	-0.127073	0.620839	-2.11276	1.06041	0.789415	-0.35913	0.468743	-1.97344
NOD2	no	yes	no	no	no	0.539704	-1.82953	0.49124	0.880516	0.406303	0.68043	-0.318875	0.148686	0.326818	-0.042359	0.630025	1.1762	0.848216	0.739133	-1.0521
SERTAD3	no	no	no	yes	no	-1.44387	-1.88832	1.48138	-0.633889	0.0942292	-1.43511	-0.871252	-1.76987	-0.93906	0.105432	-0.48133	-0.704395	0.302985	-1.34321	-0.466371
AXL	no	yes	no	no	no	-0.563221	-0.563221	-0.563221	-0.563221	-0.563221	-0.563221	-0.563221	1.02777	1.13202	2.74034	-0.563221	1.03728	-0.563221	-0.563221	-0.563221
KLK2	yes	no	no	no	no	1.21131	1.08836	0.0355279	0.605749	-2.00215	1.02137	1.02195	-0.00694066	0.636828	-2.19126	1.36494	1.02995	0.105065	0.685789	-2.33333
BEST1	no	yes	no	no	no	-1.36775	-1.47549	0.54464	-0.922636	0.35945	-1.41867	-1.63937	0.111893	-1.94998	1.52247	-0.659268	-0.722915	0.695805	-1.55026	0.764118
SLC3A2	no	no	no	yes	no	-0.671327	-0.619156	1.91102	-0.613306	1.08643	-0.819718	-0.599534	1.0653	-0.68185	1.76013	-0.494951	-0.314249	1.83983	-0.408665	1.35748
RAB4A	yes	no	no	no	no	1.30878	0.730849	0.484	0.454063	-1.53119	1.06363	1.02428	-1.71614	0.00790443	-1.85383	1.17209	0.958882	-0.810696	0.726092	-1.18962
DDIT4	no	no	no	yes	no	-0.618022	-0.343346	1.53735	-0.357015	1.95767	-0.633795	-0.439358	1.22393	-0.392065	2.08207	-0.561626	-0.309271	1.49963	-0.257525	1.82989
TAP1	no	no	no	yes	no	-0.940932	-1.49025	0.317016	-1.97644	0.312318	-1.87065	-1.48239	-0.5714	-1.25748	0.393953	-1.27409	-0.447657	0.768864	-0.834158	-0.232458
MTNR1A	no	no	yes	no	no	-0.383424	-0.383424	-0.383424	-0.383424	-0.383424	-0.383424	-0.383424	-0.383424	-0.383424	-0.383424	-0.383424	-0.383424	-0.383424	-0.383424	-0.383424
CDKN2AIP	no	no	no	yes	no	0.706517	1.51867	-0.117415	1.48577	-0.0752729	0.751901	1.56833	-0.341501	0.87775	-0.444073	1.0801	-0.107453	-0.211455	1.74375	0.62936
IL7R	no	yes	no	no	no	-0.260563	-0.260563	-0.260563	-0.260563	-0.260563	-0.260563	-0.260563	-0.260563	-0.260563	-0.260563	-0.260563	-0.260563	-0.260563	-0.260563	-0.260563
CXCL10	no	yes	no	no	no	0.340626	0.458761	-0.250969	0.747473	-1.24359	0.0866182	0.892018	-0.799216	0.620717	-1.48805	0.690622	-2.17858	-0.268283	0.0624458	-0.896098
CXCL11	no	yes	no	no	no	-1.13059	1.01253	-1.13059	0.125425	-1.13059	1.47053	0.230242	-1.13059	1.34105	-0.337656	-0.227358	-1.13059	-1.13059	-1.13059	0.763207
SHE	no	no	yes	no	no	-0.595787	-0.595787	0.96627	-0.595787	-0.595787	-0.595787	-0.595787	-0.595787	-0.595787	-0.595787	-0.595787	0.797628	-0.595787	-0.595787	0.675862
PTAFR	no	yes	no	no	no	0.236327	-0.0684924	-0.258512	0.317752	-0.338108	1.04931	0.225556	0.701189	0.878673	-0.400176	1.10518	1.52444	-0.0811761	1.77196	-0.236135
CXCL8	no	yes	no	no	no	-0.0971439	1.50152	0.312654	0.497369	1.02692	-0.0415083	0.322688	1.14624	-1.32208	1.22004	-0.47994	-0.40276	1.0548	0.101371	-0.483096
GPR183	no	yes	no	no	no	-0.182574	-0.182574	-0.182574	-0.182574	-0.182574	-0.182574	-0.182574	-0.182574	-0.182574	-0.182574	-0.182574	-0.182574	5.29465	-0.182574	-0.182574
HINT1	no	no	no	yes	no	-0.359506	0.861937	3.03429	0.257856	-0.0517189	-0.137572	0.718791	-1.5318	-0.0638892	0.147271	0.9195	1.18016	0.184341	1.58308	-0.285807
BUB1	no	no	yes	no	no	1.57344	1.35863	-0.658641	1.43179	0.51935	1.45243	1.54882	-0.855937	1.29365	-0.521717	0.956664	1.28012	-1.17202	1.52164	0.275626
DCXR	no	no	no	yes	no	0.146358	0.31025	2.53123	-0.131034	-1.58508	-0.97232	0.0720755	-1.79474	-0.516804	-0.24903	1.1441	1.13043	2.09206	0.643112	-2.01836
TACR3	no	yes	no	no	no	-0.262002	-0.262002	-0.262002	-0.262002	-0.262002	-0.262002	-0.262002	-0.262002	-0.262002	-0.262002	-0.262002	-0.262002	-0.262002	-0.262002	3.9587
PCDH7	no	yes	no	no	no	1.02193	-0.708458	0.747381	0.945825	-0.708458	-0.708458	-0.708458	-0.708458	0.66708	0.335908	-0.708458	0.590207	-0.708458	-0.708458	1.23118
TM4SF1	no	no	no	yes	no	1.11459	0.782483	-1.03251	-0.38923	-1.45171	1.6534	1.03945	-0.680417	0.840137	-2.76448	0.0961338	0.410939	-1.27376	0.124875	-1.92478
CDK1	no	no	yes	no	no	1.24468	1.57413	0.168884	1.58923	-0.0988583	1.56216	1.53022	-0.039513	1.39739	-1.16877	1.25879	1.13659	-0.581627	1.34392	0.211365
FOS	no	no	no	yes	no	-1.80957	-0.583733	1.30888	-0.36503	0.524668	-0.657996	-1.34754	0.187964	-1.04251	1.16726	0.0894819	-1.07826	1.32178	-1.77135	0.93873
KRT8	yes	no	no	no	no	-1.05328	-1.10779	2.11119	-1.3582	-0.418556	-1.84103	-0.82693	-1.24591	-1.33406	0.76384	0.00186861	-0.311191	0.899954	-0.468215	-0.875195
ADORA2B	no	yes	no	no	no	0.198275	-0.144215	2.42881	-0.194028	1.99934	-0.539529	-0.86936	0.86824	0.550013	0.570683	0.529865	-1.36303	1.61626	0.734687	0.495561
CD14	no	yes	no	no	no	-0.151675	-0.0133209	1.12734	0.331121	0.773003	-0.443453	-0.936995	1.11224	0.374576	1.07281	-0.301256	-1.37956	0.0462738	1.01964	0.411225
PA2G4	yes	no	no	no	no	1.1955	1.01146	0.490043	1.01769	-1.92465	0.738857	1.1122	-1.33835	0.722395	-1.77556	1.21556	1.24555	0.107205	1.33403	-2.15937
POLH	no	no	no	yes	no	1.05567	1.15872	-0.815416	1.04381	-1.26749	1.09747	-0.283349	-0.656313	0.0628275	-1.57169	1.4823	0.553927	-1.61119	1.30639	-1.80635
PPM1D	no	no	no	yes	no	1.1062	1.97032	-0.94637	0.426387	-1.14015	1.30513	0.399867	-0.928136	0.639996	-1.75848	1.55546	0.746061	-0.0788959	1.3328	-2.3205
TRIAP1	no	no	no	yes	no	0.827847	1.76386	0.305548	1.65654	-0.242883	1.5969	1.62487	-0.802085	1.40985	-1.60316	0.78711	0.871261	-0.843494	1.35102	-0.113949
PGK2	no	no	yes	no	no	2.43193	-0.368201	-0.368201	-0.368201	-0.368201	-0.368201	-0.368201	1.72081	-0.368201	-0.368201	-0.368201	1.73331	-0.368201	-0.368201	-0.368201
HAS2	no	yes	no	no	no	-0.182574	-0.182574	-0.182574	-0.182574	-0.182574	-0.182574	-0.182574	-0.182574	-0.182574	-0.182574	-0.182574	-0.182574	-0.182574	-0.182574	-0.182574
FPR1	no	yes	no	no	no	-0.323081	-0.323081	2.46805	-0.323081	-0.323081	-0.323081	-0.323081	-0.323081	-0.323081	-0.323081	-0.323081	-0.323081	-0.323081	-0.323081	-0.323081
KRT19	yes	no	no	no	no	0.660803	1.57587	-1.19618	0.486892	-2.28255	-0.10062	0.632422	-1.85246	0.340529	-1.33756	1.00042	0.863832	0.335823	0.904516	-2.31987
PTGER4	no	yes	no	no	no	0.466185	1.71727	-1.0585	0.282187	-2.81983	1.52601	0.953657	-0.179127	-0.160556	-0.617897	1.45086	0.449067	-1.16235	0.293474	-1.71673
NMUR1	no	yes	no	no	no	-0.458454	-0.458454	-0.458454	2.25598	-0.458454	-0.458454	-0.458454	0.90492	-0.458454	0.644508	-0.458454	-0.458454	1.95585	-0.458454	-0.458454
HDAC3	no	no	no	yes	no	1.02058	-0.094629	-0.237988	0.126456	-1.23912	0.0862308	0.470783	-1.11917	-0.552861	-0.958782	2.33239	1.46365	-0.568153	1.58341	-2.19427
C3AR1	no	yes	no	no	no	-0.182574	-0.182574	-0.182574	-0.182574	-0.182574	-0.182574	-0.182574	-0.182574	-0.182574	-0.182574	-0.182574	-0.182574	-0.182574	-0.182574	-0.182574
CXCR6	no	yes	no	no	no	-1.03771	-1.03771	2.0518	-1.03771	-1.03771	0.613054	-0.0513085	-1.03771	0.217518	0.550023	0.0478774	0.875652	-1.03771	0.797238	1.23843
RASGRP1	no	yes	no	no	no	-0.137407	1.02376	-1.77674	-0.396124	-0.512797	0.226056	-0.611592	-1.54472	-0.836675	-0.662987	0.45476	0.461236	-0.251787	0.866709	-0.267232
RAD9A	no	no	no	yes	no	1.51752	1.80531	0.0977393	0.272278	-1.7196	-0.672792	0.0311024	-1.27886	-0.616666	-0.960912	1.01728	1.03998	0.935093	0.831917	-2.42142
ZMAT3	no	no	no	yes	no	-0.700034	-0.475675	-1.48577	-1.03559	0.734222	-0.0843992	-0.845775	-0.0131982	-0.696997	-1.46721	-1.74033	-1.29554	-1.00139	-1.72438	0.937114
RELA	no	yes	no	no	no	-0.46802	-0.456427	-0.862624	0.36437	-1.96803	-0.971473	-0.79834	-0.735624	0.0731178	0.501862	1.44207	0.846438	0.707165	1.85868	-2.37561
OLR1	no	yes	no	no	no	2.26861	-0.430138	-0.430138	-0.430138	-0.430138	1.27393	-0.430138	-0.430138	-0.430138	-0.430138	-0.430138	-0.430138	-0.430138	-0.430138	-0.430138
AGFG1	no	no	yes	no	no	1.34307	1.75157	-0.612439	0.772461	1.16116	1.27887	0.384525	-0.384696	1.42765	-2.06419	-0.391432	-0.171273	-1.81653	-0.309595	1.72652
PLK3	no	no	no	yes	no	-1.47874	-0.658887	-1.22002	-0.442903	-0.887359	-1.38983	-0.67423	-0.821174	-0.355288	0.141253	0.166019	-1.37035	0.408492	1.92755	-0.57067
CTSF	no	no	no	yes	no	-2.7775	-0.890368	0.958757	-1.80219	0.308608	-1.32652	-0.85922	0.0780076	-1.01723	1.16151	-0.762212	-0.485608	2.09955	-0.705597	0.495853
TLR1	no	yes	no	no	no	1.30767	-0.891428	0.958755	-0.891428	0.905701	0.497149	-0.891428	-0.891428	-0.891428	1.31977	0.620447	-0.891428	-0.891428	0.679757	0.61478
PHLDA3	no	no	no	yes	no	-1.35921	-0.492083	1.20976	-0.482453	-2.9915	0.260594	-0.188329	0.329209	0.510413	-0.191705	0.487994	-0.0571899	0.818164	0.283503	-0.644509
ATP2A2	no	yes	no	no	no	1.95031	1.6774	-0.243579	1.13948	-0.679742	2.17117	0.876285	1.07332	1.30854	-1.4161	0.910882	0.815886	0.210284	0.506882	-1.02274
CMKLR1	no	yes	no	no	no	-0.383003	-0.383003	-0.383003	-0.383003	-0.383003	-0.383003	-0.383003	-0.383003	-0.383003	-0.383003	-0.383003	-0.383003	-0.383003	-0.383003	-0.383003
HRAS	no	no	no	yes	no	0.162716	-0.113924	0.78305	-0.18119	-3.07333	-0.152863	0.185805	-1.62111	-0.275481	-0.791579	0.959332	0.996679	0.997247	0.724444	-1.60918
ADGRE1	no	yes	no	no	no	-0.182574	-0.182574	-0.182574	-0.182574	-0.182574	-0.182574	-0.182574	-0.182574	-0.182574	-0.182574	-0.182574	-0.182574	-0.182574	-0.182574	-0.182574
CNIH2	no	no	yes	no	no	0.78979	1.44931	-2.68204	1.97832	1.14257	-0.0440973	-0.000790921	-1.7103	-0.721547	1.09973	0.271111	0.606893	-0.341597	0.653983	-1.77498
CHST2	no	yes	no	no	no	0.124192	-2.49669	0.179654	0.0383576	0.126423	0.926698	-0.659989	-0.847577	-0.288436	-0.708423	-0.519262	0.520846	0.938868	-0.907133	-0.524946
DDIT3	no	no	no	yes	no	-0.615494	-0.658113	1.26765	-0.381982	1.85135	-0.960085	-0.762248	0.874569	-0.488939	2.05262	-0.724159	-0.330949	1.35225	-0.102848	1.9163
P2RY2	no	yes	no	no	no	-0.686465	2.22536	0.116584	1.22305	1.4467	0.314311	0.384584	-0.602542	0.520622	0.00603929	0.169583	1.29191	0.0621528	0.470344	-1.1612
SFN	no	no	no	yes	no	0.789968	-0.266067	0.585521	0.0595854	-0.288258	-1.04885	-0.544128	0.668321	0.199722	-0.944255	-0.416187	-0.336815	1.35761	-0.255881	-0.718801
BAIAP2	no	no	no	yes	no	0.988359	-0.19552	1.34668	-0.326542	-0.108917	-0.553792	-0.638592	-1.50456	-0.683094	2.27069	0.30865	0.211363	1.62088	0.512432	-1.35005
NUPR1	no	no	no	yes	no	-0.534649	-0.502547	1.70411	-0.354516	1.70099	-0.770401	-0.557206	0.581562	-0.524028	2.26897	-0.238023	0.0280855	1.6957	0.0583476	1.71597
IP6K1	no	no	yes	no	no	-0.998801	-0.984362	-0.845764	0.872986	-1.73005	-1.10068	0.633561	-0.607014	-0.831503	0.380739	0.366347	-0.534429	0.00849139	0.732353	-0.951987
GPX2	no	no	no	yes	no	-0.246275	-0.0494531	0.196038	-1.31697	0.565756	0.243753	-1.10813	-1.41539	-0.518736	0.128689	-0.108745	-3.35277	-0.401409	-0.497604	0.770795
SPHK1	no	yes	no	yes	no	0.168191	-0.416565	-1.00259	1.20138	-0.528813	-0.889448	0.591837	-0.441846	-1.49187	-0.638501	-0.365674	-0.141515	1.23484	-0.539079	-0.389055
CDK5R1	no	no	no	yes	no	1.24603	0.364584	-1.2402	-0.374693	-1.73324	1.1605	0.449122	-0.213518	0.365665	-2.2794	0.39753	0.540188	-0.013303	-0.289705	-2.38206
RHOG	no	yes	no	no	no	0.349227	1.01505	1.54551	0.590935	-1.23372	-0.821456	0.145733	-0.591801	-1.04945	-0.829998	1.24409	1.4928	0.758695	1.1807	-2.0286
EPS8L2	no	no	no	yes	no	-0.429397	-0.320097	0.333919	-0.245031	-2.43456	-0.590359	-0.313682	-0.332001	-0.215503	0.330525	0.481569	-0.139603	0.400108	0.573654	-1.32787
TALDO1	no	no	yes	no	no	-0.449681	-0.417224	2.4264	-0.952371	-1.57031	-1.27399	-0.528002	-1.49026	-1.61193	-0.548752	0.141827	0.246908	1.13365	0.383368	-1.54004
CLVS1	no	no	yes	no	no	2.13511	-0.434402	-0.434402	-0.434402	-0.434402	-0.434402	-0.434402	-0.434402	-0.434402	-0.434402	-0.434402	1.49403	-0.434402	-0.434402	2.44583
RPS6KA3	yes	no	no	no	no	1.20503	1.52968	-0.569537	1.3533	0.321735	1.80161	1.64976	0.769243	1.43352	-1.2823	0.517275	0.71104	-0.824905	0.493551	1.37945
NHLH2	no	no	no	yes	no	-0.359161	-0.359161	-0.359161	-0.359161	2.99548	-0.359161	-0.359161	-0.359161	-0.359161	1.1956	-0.359161	1.57419	-0.359161	-0.359161	-0.359161
PIDD1	no	no	no	yes	no	0.867855	-0.00644528	0.146117	0.00932178	-2.42612	0.198455	-1.30174	-0.274128	0.869663	-0.877521	1.04144	0.769381	1.13428	0.872132	-2.80266
JUN	no	no	no	yes	no	-0.90527	-1.54376	2.41608	-1.40293	-1.31028	-0.926871	-0.779612	1.37551	-0.399549	1.53357	-0.906943	-0.121601	1.86274	-0.515097	-0.332804
MLF1	no	no	yes	no	no	-0.201424	-0.262761	0.314294	0.676543	1.50396	-1.02855	0.761915	-1.43445	-0.24786	0.731303	-0.198896	0.584643	-0.372566	0.608794	2.69714
MAF	yes	no	no	no	yes	1.49126	1.39329	-1.05978	0.319819	-1.67124	1.48846	1.1191	-0.639639	0.286952	-1.2835	1.63156	1.00751	-0.981097	0.529632	-1.34906
FUCA1	no	no	no	yes	no	-1.28757	-1.04538	0.421274	-0.906218	1.82324	-0.583241	-1.6037	-0.674126	-0.578592	0.0505777	-2.25586	-1.42991	-0.173357	-1.47	0.344508
DNAJB8	no	no	yes	no	no	-0.260354	-0.260354	-0.260354	-0.260354	-0.260354	-0.260354	-0.260354	-0.260354	-0.260354	-0.260354	-0.260354	-0.260354	-0.260354	-0.260354	-0.260354
ALOX15B	no	no	no	yes	no	0.349713	-3.29542	-0.0316268	-0.0962448	0.643708	0.453746	-2.35962	0.235195	-1.38961	0.783997	-0.166289	0.00927193	0.681715	0.542186	0.776993
GRM8	no	no	yes	no	no	-0.661577	-0.661577	-0.661577	-0.661577	1.18137	-0.661577	0.74719	-0.661577	1.13113	-0.661577	-0.661577	-0.661577	-0.661577	-0.661577	0.883036
CHRM4	no	no	yes	no	no	-0.196558	-1.75324	0.324223	-1.75324	0.273924	-0.125855	-0.140833	1.38357	0.227164	0.281856	-1.75324	1.39583	0.84587	-1.75324	-0.687037
AEN	no	no	no	yes	no	0.805955	0.829456	0.115537	0.427352	-2.70706	0.895863	0.912985	-0.84911	0.703311	-1.94538	1.22196	1.21098	-0.291939	1.31779	-2.38469
F2R	no	no	no	yes	no	-0.909281	-0.15043	-0.0339578	-0.101276	0.796245	-0.168471	-1.0471	0.0927236	0.456057	-0.580114	-1.63138	-0.674834	0.0748555	-0.290553	-0.611144
RAP2B	no	no	no	yes	no	-2.16416	-0.984699	0.714218	0.425948	1.3712	-0.978044	-1.4692	-0.514616	0.203615	1.22635	-2.2676	-1.0263	0.670254	0.214493	1.5408
TNFSF15	no	yes	no	no	no	-0.973665	-0.483491	0.471631	-1.05105	2.03121	-1.21983	-0.484403	1.43196	-0.535409	1.23834	-1.20652	-0.859813	1.21182	-1.07243	1.76879
LCK	no	yes	no	no	no	-0.905201	-0.905201	-0.905201	1.35794	-0.905201	-0.905201	1.514	-0.905201	-0.905201	1.08672	0.142304	-0.905201	-0.905201	0.183397	0.138378
ABAT	no	no	no	yes	no	-1.53632	-1.32859	0.0870381	-1.63296	0.288973	-1.53436	-1.54787	0.250117	-1.3072	0.317444	-1.36438	-1.32438	0.165377	-1.28593	0.0164364
GPR132	no	yes	no	no	no	-0.526724	-0.526724	0.968186	-0.526724	1.78713	-0.526724	-0.526724	-0.526724	-0.526724	-0.526724	-0.526724	-0.526724	0.950329	0.742761	-0.526724
PSMG1	no	no	yes	no	no	1.13451	1.20211	0.677514	1.64789	0.0365667	1.58272	1.63182	-0.26385	1.68639	-1.27919	0.890466	0.974605	-0.474239	0.971171	0.554522
UPP1	no	no	no	yes	no	-0.23637	-0.483332	2.64479	0.229982	0.913145	-0.23212	-0.855998	0.419682	-0.558104	0.439219	0.312101	0.0989983	1.27986	0.133553	1.72073
TMEM50A	yes	no	no	no	no	0.488899	1.63055	0.327049	0.754108	1.09696	0.715466	0.773688	-0.148304	1.93598	0.0727365	0.566872	-0.77799	-1.1394	0.0687283	1.30708
TMPRSS2	yes	no	no	no	no	0.951958	0.791569	0.674513	0.0729705	-1.76978	0.609709	0.676832	0.806223	0.0939374	-1.77145	0.859626	0.599024	0.666647	0.134705	-2.05491
TSPYL2	no	no	no	yes	no	-1.18253	-1.05966	0.0401893	-0.730873	1.00651	-1.7921	-1.16361	0.529117	-0.439632	2.44151	-1.77486	-1.28086	1.03428	-0.569374	1.81978
IRAK1	no	no	no	yes	no	-0.770065	-0.0340013	1.05779	-0.215619	-3.02299	-0.178257	0.612158	-0.143136	0.593731	0.16096	0.602208	0.749222	0.537899	0.543942	-1.91912
ALDH1A3	yes	no	no	no	no	0.716275	0.582177	0.0591742	0.282308	-1.86359	0.734437	0.150666	1.28122	-0.286324	-1.77723	0.0708008	0.0358818	0.180847	-0.234328	-1.70319
CSF1	no	yes	no	no	no	0.0930572	-0.834599	0.484092	1.1761	1.23081	-0.257249	-0.597746	0.574901	-0.551761	0.279512	-0.0285818	-0.584476	0.420613	0.537246	0.665282
PDE4B	no	yes	no	no	no	1.06439	1.44763	-1.09326	1.17512	0.819437	0.632141	0.266176	0.810524	0.311573	0.000865272	0.0208038	-0.0764855	-3.06443	1.43487	0.24406
JAG2	no	no	no	yes	no	0.298221	0.510593	-0.46795	0.226977	-3.34633	0.89218	0.35192	0.528153	0.764443	-0.715102	0.669107	0.236101	-0.134891	0.444921	-1.7042
RPS27L	no	no	no	yes	no	-1.13981	-0.454435	0.131791	-0.949678	-0.0832313	-0.933474	-0.545656	-2.46637	-0.539441	-1.16358	-0.597357	-0.938412	-1.60964	0.184636	-0.810175
GP1BA	no	yes	no	no	no	-1.09463	-1.09463	0.025978	2.31174	-1.09463	0.297806	0.69382	0.511159	-1.09463	0.244639	0.403173	-1.09463	0.0125924	-0.143004	-1.09463
SOCS1	no	no	no	yes	no	-1.00931	-1.71304	1.02759	-0.0560024	1.2353	-1.07947	-0.746375	-0.0114844	-0.00104078	1.72174	0.871382	-0.14633	0.406893	-0.4287	0.861874
TCN2	no	no	no	yes	no	0.521293	1.09041	1.18028	1.91717	-0.37651	-0.752161	-0.766234	-0.517859	1.06198	-0.369056	0.204673	0.362516	-0.348896	-0.103629	-1.27947
IRF7	no	yes	no	no	no	-2.53799	-0.664859	1.55763	-0.169692	1.39552	-1.36908	-2.11927	-0.686262	-0.521426	1.08298	0.183868	-0.272825	0.992048	-0.443641	0.477251
SP1	no	no	no	yes	no	1.71281	0.63945	-0.132394	1.39961	0.821514	1.80472	0.732607	1.27666	0.836728	-0.187014	0.863337	1.06049	-0.89708	0.686496	0.49588
ZFP36L1	no	no	no	yes	no	-0.981778	-1.18972	-0.442474	-0.256143	2.18152	-0.248383	-0.613544	1.27221	-0.57758	1.93617	-0.987859	-0.411295	1.06412	-0.73963	1.83185
IFITM1	no	yes	no	no	no	1.07699	0.732089	0.517085	1.16912	0.664465	-1.94746	-0.125433	-0.106333	0.342514	1.66516	1.06179	0.404528	-0.794741	-0.231123	-0.634524
RXRA	no	no	no	yes	no	-0.33544	-0.702408	0.0182098	0.162745	-2.20865	-0.176492	-0.272054	1.04133	0.433268	0.933928	-0.186765	-0.86147	0.309607	-0.435852	-1.50858
INSIG1	yes	no	no	no	no	0.56264	0.757622	-0.0907404	-0.0622929	1.93327	0.516824	0.373275	0.509424	0.0440304	1.62188	0.14601	0.363066	0.591024	0.119134	2.11754
NF2	no	no	yes	no	no	0.436068	0.401326	-0.467627	0.166366	-2.9239	0.762078	0.335182	-0.22397	0.662633	-0.98352	0.775584	0.495163	-0.578517	0.657279	-2.37148
HEXIM1	no	no	no	yes	no	-0.488758	0.288948	-0.0845492	-0.276819	-2.38554	0.931173	0.375249	0.666255	0.770718	-0.24407	0.380284	-0.261511	0.169619	-0.0974123	-0.940159
