# Supplementary material for: Rational optimization of a transcription factor activation domain inhibitor
Source: Nat Struct Mol Biol. 2023 Dec 4;30(12):1958–69. doi: 10.1038/s41594-023-01159-5 (PMC10716049; doi:10.1038/s41594-023-01159-5)
Supplement: Supplementary file 19 — Statistical source data. [file 41594_2023_1159_MOESM19_ESM.xlsx]

## Sheet: EDF1B
AR Droplet #	Intensity (AU)	Diameter (nm)
1	72.143	133.512
2	71.562	201.851
3	91.25	174.808
4	80.636	167.366
5	80.128	317.153
6	79.2	195.441
7	81.393	269.397
8	79.571	300.666
9	111.905	233.986
10	96.667	87.4039
11	96.889	151.388
12	93.105	382.652
13	90.385	259.772
14	83.115	259.772
15	101.071	188.814
16	81.294	208.063
17	89.797	406.843
18	91.167	123.608
19	93.667	87.4039
20	83.13	244.627
21	83.25	201.851
22	81.105	313.113
23	91.68	254.824
24	90.714	133.512
25	100	233.986
26	74.125	201.851
27	94.625	201.851
28	99.333	151.388
29	90.943	300.666
30	81.043	244.627
31	94.727	167.366
32	99.55	225.676
33	90.154	181.946
34	87.588	208.063
35	100.929	269.397
36	91.621	274.082
37	102.923	365.637
38	81.727	167.366
39	94.167	174.808
40	83.1	159.577
41	76.333	123.608
42	80.682	336.628
43	94.96	254.824
44	103.429	188.814
45	128	87.4039
46	91.182	167.366
47	85.826	244.627
48	100.458	249.777
49	100.114	336.628
50	103.583	304.871
51	81.478	244.627
52	105	225.676
53	104.429	188.814
54	109.429	188.814
55	83	87.4039
56	122	201.851
57	88.444	151.388
58	87.545	239.365
59	86.545	239.365
60	90.148	264.628
61	72.75	100.925
62	72.949	317.153
63	97.513	317.153
64	109.63	264.628
65	88.077	181.946
66	106.043	244.627
67	77.143	133.512
68	98.56	254.824
69	101.571	328.976
70	81.8	225.676
71	95.467	195.441
72	73.783	244.627
73	82.778	151.388
74	80.36	358.605
75	108.263	219.962
76	89.118	208.063
77	83	188.814
78	101.667	87.4039
79	100.375	201.851
80	91.55	321.142
81	90.8	278.689
82	99	112.838
83	94.2	159.577
84	90.059	208.063
85	103.571	133.512
86	112.091	167.366
87	86.226	283.221
88	109.25	100.925
89	75.13	244.627
90	101.917	174.808
91	106.5	100.925
92	88.738	328.976
93	110.357	188.814
94	91.556	151.388
95	83.25	225.676
96	85.37	264.628
97	117.5	123.608
98	87	225.676
99	89	133.512
100	102.16	254.824
101	89.92	254.824
102	102.9	159.577
103	79.067	195.441
104	91.406	287.681
105	62	87.4039
106	74.375	201.851
107	79.857	188.814
108	76.983	389.25
109	83.667	123.608
110	107	219.962
111	90.161	283.221
112	85.5	225.676
113	74.857	233.986
114	93.75	100.925
115	73.731	259.772
116	92.333	195.441
117	81.125	142.73
118	84.6	112.838
119	82.556	151.388
120	73.25	100.925
121	89	133.512
122	87.233	278.689
123	90	100.925
124	74.857	188.814
125	90.375	142.73
126	72	167.366
127	85.3	159.577
128	82.538	181.946
129	77.607	269.397
130	99.842	219.962
131	86.708	249.777
132	85.04	358.605
133	82.625	142.73
134	75.556	264.628
135	98.987	439.923
136	93.267	195.441
137	89.333	174.808
138	104.385	181.946
139	89.316	219.962
140	120.5	123.608
141	88	87.4039
142	79.8	112.838
143	76.25	142.73
144	94.435	244.627
145	74.031	287.681
146	85.231	181.946
147	97.667	123.608
148	84	233.986
149	73.913	244.627
150	95.955	239.365
151	78.423	365.637
152	92.056	214.095
153	76.857	133.512
154	92.295	336.628
155	96.769	181.946
156	90.286	188.814
157	86	219.962
158	82.667	87.4039
159	97.125	201.851
160	77.421	219.962
161	90.92	358.605
162	87.647	208.063
163	100.083	174.808
164	89.795	317.153
165	100.067	195.441
166	89.833	214.095
167	83.737	219.962
168	84.111	151.388
169	84.857	133.512
170	110.227	239.365
171	117.375	201.851
172	87.172	274.082
173	86.552	385.965
174	97.25	100.925
175	84.714	133.512
176	94	167.366
177	87.222	340.389
178	94.75	142.73
179	84	174.808
180	93.258	400.535
181	83.273	375.938
182	75.25	100.925
183	104.955	239.365
184	80.2	159.577
185	87.615	259.772
186	103.727	239.365
187	108.286	133.512
188	73	188.814
189	96	208.063
190	94.48	358.605
191	101.667	174.808
192	66.25	142.73
193	89.478	244.627
194	86.25	142.73
195	74	239.365
196	89.083	249.777
197	91.846	181.946
198	83.722	214.095
199	99.333	87.4039
200	84.455	239.365
201	70.316	219.962
202	81.643	188.814
203	95.8	195.441
204	79.125	142.73
205	91.909	292.074
206	85.9	159.577
207	85.9	159.577
208	83.37	264.628
209	82.625	142.73
210	98.85	225.676
211	94.6	159.577
212	91	87.4039
213	92.143	188.814
214	92.2	112.838
215	93.571	133.512
216	76.357	269.397
217	93.56	254.824
218	97.2	112.838
219	88.333	123.608
220	92.75	100.925
221	100.294	208.063
222	82.714	133.512
223	110.6	159.577
224	87.8	112.838
225	78.556	151.388
226	74.615	181.946
227	81.871	283.221
228	90.312	201.851
229	85.304	244.627
230	84.333	214.095
231	90.211	313.113
232	86	195.441
233	105.216	309.019
234	77.688	201.851
235	115.444	151.388
236	82.25	100.925
237	101.741	264.628
238	81.516	283.221
239	81.8	112.838
240	95	167.366
241	114.182	167.366
242	96.667	87.4039
243	115.333	87.4039
244	112.091	167.366
245	79.368	219.962
246	87.353	296.401
247	100.25	201.851
248	124.412	208.063
249	120.714	133.512
250	83.846	181.946
251	93.786	188.814
252	105.913	244.627
253	118.611	214.095
254	89.4	112.838
255	79	133.512
256	83.182	167.366
257	91.833	123.608
258	101.1	159.577
259	87.174	244.627
260	101.182	167.366
261	72.722	214.095
262	88.5	142.73
263	67.353	208.063
264	102.88	254.824
265	78.737	219.962
266	79.083	174.808
267	74	123.608
268	80.182	167.366
269	92.862	274.082
270	111.684	219.962
271	91.312	201.851
272	80.833	123.608
273	92.273	167.366
274	92	123.608
275	105.5	188.814
276	81	133.512
277	103.8	159.577
278	98.522	244.627
279	90.5	142.73
280	96.923	181.946
281	99	239.365
282	102.75	100.925
283	94.8	159.577
284	94	100.925
285	92.9	278.689
286	93.714	133.512
287	86.6	112.838
288	81.75	100.925
289	83.125	142.73
290	90.75	100.925
291	89.333	123.608
292	109.5	123.608
293	90.4	159.577
294	96.692	259.772
295	106	142.73
296	83	159.577
297	91.152	344.109
298	98.583	174.808
299	95.958	249.777
300	93.632	219.962
301	85.647	208.063
302	97	100.925
303	90.393	269.397
304	81.571	233.986
305	71.5	201.851
306	97.737	219.962
307	80.385	181.946
308	86.111	214.095
309	92.5	159.577
310	71.667	87.4039
311	84.25	100.925
312	102.7	159.577
313	90.394	292.074
314	105.364	239.365
315	103.312	201.851
316	106.261	244.627
317	80.083	249.777
318	108	159.577
319	93.5	159.577
320	102	112.838
321	89.571	188.814
322	108.48	254.824
323	82.318	239.365
324	91.632	219.962
325	103.7	159.577
326	91.583	249.777
327	75.6	112.838
328	93.469	287.681
329	105.786	188.814
330	84.357	188.814
331	117	244.627
332	83.944	214.095
333	86.217	344.109
334	99.5	100.925
335	88.545	167.366
336	86.143	133.512
337	74.444	214.095
338	83.167	278.689
339	94.222	214.095
340	76.364	167.366
341	112.727	167.366
342	80.917	249.777
343	96	151.388
344	103.75	100.925
345	86.818	167.366
346	83.435	244.627
347	78.182	239.365
348	100.808	259.772
349	94.857	233.986
350	90.714	133.512
351	109.042	249.777
352	84.429	188.814
353	72.167	123.608
354	86.143	233.986
355	86.667	87.4039
356	110.5	100.925
357	79.745	347.79
358	80.36	254.824
359	106.735	296.401
360	99	100.925
361	81.538	181.946
362	85.438	201.851
363	110.3	321.142
364	73	133.512
365	98.4	112.838
366	78.375	142.73
367	72.353	208.063
368	80.692	181.946
369	84.8	112.838
370	82.143	188.814
371	70.667	87.4039
372	95.727	292.074
373	80.25	142.73
374	84.1	159.577
375	83.9	159.577
376	83.25	201.851
377	97.75	100.925
378	112.667	151.388
379	89.667	87.4039
380	100.6	159.577
381	122.571	133.512
382	92.343	300.666
383	76.737	219.962
384	81.375	142.73
385	98.4	112.838
386	75.818	167.366
387	103.125	142.73
388	85.154	181.946
389	88.536	269.397
390	93.6	159.577
391	86.182	167.366
392	94.462	181.946
393	85.12	254.824
394	99.429	133.512
395	103.6	112.838
396	95.703	309.019
397	107.333	174.808
398	85.605	313.113
399	92.867	195.441
400	86.938	201.851
401	79.97	292.074
402	80.4	225.676
403	91.778	214.095
404	89.2	112.838
405	117.625	142.73
406	126.5	100.925
407	88.4	195.441
408	86.688	201.851
409	85.056	214.095
410	104.25	142.73
411	97.579	219.962
412	90	167.366
413	86.238	233.986
414	87.059	296.401
415	91.2	159.577
416	91.333	151.388
417	81	174.808
418	93.167	304.871
419	98.786	188.814
420	103	112.838
421	91.5	239.365
422	104.286	133.512
423	92.864	389.25
424	104.846	181.946
425	85.667	195.441
426	106.143	233.986
427	85.733	195.441
428	92	167.366
429	79.333	87.4039
430	82.375	201.851
431	86.8	112.838
432	74.857	133.512
433	89.676	296.401
434	81.308	181.946
435	93.2	225.676
436	82.263	219.962
437	77.875	201.851
438	108.25	142.73
439	93.778	151.388
440	75.818	239.365
441	79.133	278.689
442	95	296.401
443	95.625	201.851
444	91.375	142.73
445	95.45	225.676
446	105.708	249.777
447	88.429	133.512
448	66.25	100.925
449	85.8	159.577
450	89.462	181.946
451	87.567	278.689
452	73.2	195.441
453	91.269	259.772
454	94.444	151.388
455	90.6	159.577
456	103.2	195.441
457	80.045	239.365
458	108.25	142.73
459	113.243	309.019
460	78.4	112.838
461	81.263	219.962
462	111.2	159.577
463	93.875	142.73
464	95.615	181.946
465	80.75	142.73
466	81.192	259.772
467	81.583	174.808
468	106.704	264.628
469	96.667	151.388
470	69.071	188.814
471	78.333	87.4039
472	94.727	167.366
473	65.111	94.407
474	82.19	204.98
475	85.462	112.838
476	77.235	128.655
477	78.25	61.8039
478	78.2	142.73
479	97.25	61.8039
480	80.6	71.365
481	93.429	79.7885
482	69.944	188.814
483	78.5	50.4627
484	99.053	138.198
485	82.732	285.46
486	83.214	118.345
487	50.25	61.8039
488	80.708	155.536
489	81.333	50.4627
490	75.083	188.814
491	92.286	79.7885
492	75	50.4627
493	78.04	159.577
494	84	123.608
495	68.951	201.851
496	77.571	79.7885
497	77.308	159.577
498	85.96	159.577
499	82.25	142.73
500	76.731	159.577
501	88.667	123.608
502	73.316	138.198
503	84.478	151.388
504	77.056	133.512
505	77.048	142.73
506	91.833	79.7885
507	91.25	107.047
508	78.25	61.8039
509	66.6	123.608
510	84.2	123.608
511	95.333	107.047
512	65.462	112.838
513	74.857	79.7885
514	67.368	138.198
515	94.929	236.691
516	91.95	142.73
517	100.889	94.407
518	91.533	123.608
519	70.154	112.838
520	109.917	107.047
521	83	61.8039
522	84.5	61.8039
523	92.214	118.345
524	82.864	208.063
525	100.5	107.047
526	78.5	50.4627
527	73.154	112.838
528	77.346	159.577
529	87.087	151.388
530	77	31.5946
531	83.467	123.608
532	86.188	128.655
533	95.333	50.4627
534	92.073	201.851
535	74	71.365
536	96.963	163.518
537	73.958	155.536
538	86.036	167.366
539	82.357	118.345
540	87.13	151.388
541	83	71.365
542	80	163.518
543	81.4	71.365
544	80.714	79.7885
545	81	107.047
546	82	100.925
547	77.154	112.838
548	87.778	188.814
549	72.5	100.925
550	89	87.4039
551	92	61.8039
552	89.557	325.083
553	100.577	159.577
554	89.625	87.4039
555	69.5	50.4627
556	89.3	100.925
557	80.818	107.047
558	89.5	61.8039
559	90.314	185.412
560	75.692	112.838
561	77	171.127
562	81.632	195.441
563	94.2	71.365
564	103.5	79.7885
565	98.714	118.345
566	83.684	138.198
567	101.682	147.123
568	64.8	71.365
569	83.706	225.676
570	67.727	147.123
571	90.5	61.8039
572	83.556	211.1
573	69.5	61.8039
574	87.964	167.366
575	91.6	71.365
576	90.2	254.824
577	81.769	112.838
578	100.5	107.047
579	112.9	100.925
580	75.115	336.628
581	84.592	219.962
582	72.154	198.672
583	67.833	79.7885
584	81.111	94.407
585	72	71.365
586	74.875	87.4039
587	71.4	71.365
588	78.769	159.577
589	85.222	94.407
590	75.067	174.808
591	80.136	242.01
592	82.84	159.577
593	97.929	118.345
594	106.641	198.672
595	74.614	208.063
596	93.644	211.1
597	76	50.4627
598	79.276	171.127
599	63.667	155.536
600	72.55	142.73
601	62	50.4627
602	81.529	128.655
603	99	31.5946
604	82.5	50.4627
605	89.25	61.8039
606	78.84	159.577
607	75	50.4627
608	89.625	87.4039
609	84	118.345
610	89.826	151.388
611	99.429	79.7885
612	86.929	118.345
613	77	123.608
614	83.286	142.73
615	88.974	195.441
616	88.55	142.73
617	79.405	192.156
618	93.75	128.655
619	95.312	178.412
620	86.75	87.4039
621	85	31.5946
622	80.143	79.7885
623	73.368	138.198
624	103	31.5946
625	82.438	178.412
626	107	50.4627
627	82.462	159.577
628	85.652	151.388
629	81.5	100.925
630	90	112.838
631	81.2	100.925
632	80	31.5946
633	77.455	147.123
634	72.857	79.7885
635	104	31.5946
636	89.053	138.198
637	79.267	123.608
638	105.8	100.925
639	81.25	87.4039
640	85.833	107.047
641	90.357	118.345
642	94.25	61.8039
643	92.286	118.345
644	77.1	142.73
645	101	50.4627
646	74.08	159.577
647	94.688	128.655
648	86.333	50.4627
649	74.947	138.198
650	84.75	87.4039
651	89.786	118.345
652	79.375	128.655
653	69.2	71.365
654	83.286	118.345
655	78	31.5946
656	91.818	107.047
657	74	71.365
658	86.147	185.412
659	80	123.608
660	94.227	147.123
661	81.267	123.608
662	95.03	181.946
663	88.231	112.838
664	53	31.5946
665	80.786	118.345
666	80	31.5946
667	100.667	79.7885
668	92.542	155.536
669	101.556	94.407
670	88.5	79.7885
671	83.15	142.73
672	93.81	142.73
673	82.25	178.412
674	90.864	257.31
675	102.143	118.345
676	65.4	71.365
677	104.5	50.4627
678	92.364	208.063
679	80.361	188.814
680	78.071	118.345
681	80.5	79.7885
682	101.167	79.7885
683	74.556	94.407
684	93.825	239.365
685	87.697	181.946
686	83.167	79.7885
687	73	87.4039
688	74.4	100.925
689	106.471	128.655
690	78.446	236.691
691	80.318	147.123
692	79.1	198.672
693	76	31.5946
694	94.037	163.518
695	86.857	79.7885
696	83.872	217.048
697	69.375	155.536
698	76.184	219.962
699	120.889	94.407
700	84.875	128.655
701	87.25	61.8039
702	71	118.345
703	76.4	71.365
704	86.034	171.127
705	79.167	107.047
706	66.8	71.365
707	82.63	163.518
708	65.667	50.4627
709	112.625	87.4039
710	95.25	128.655
711	83.702	239.365
712	84.4	159.577
713	109.692	112.838
714	87.379	171.127
715	87.333	79.7885
716	87.405	192.156
717	97.222	163.518
718	78.684	138.198
719	96.357	118.345
720	103	118.345
721	78.4	71.365
722	87.667	79.7885
723	78.037	163.518
724	87.333	123.608
725	94.526	195.441
726	90.538	112.838
727	106	50.4627
728	81.64	159.577
729	80.958	155.536
730	90.564	198.672
731	80.5	107.047
732	84.689	211.1
733	88.333	79.7885
734	75.613	174.808
735	85	31.5946
736	83.75	87.4039
737	86.25	142.73
738	96.25	61.8039
739	109.875	87.4039
740	82.238	142.73
741	87	142.73
742	71.867	211.1
743	101.8	159.577
744	80.35	142.73
745	88.96	159.577
746	82.383	217.048
747	88.208	155.536
748	114.4	100.925
749	91.2	142.73
750	86.5	61.8039
751	85.435	151.388
752	74.214	167.366
753	96	31.5946
754	73.125	87.4039
755	93.75	61.8039
756	106.552	171.127
757	80.941	128.655
758	87.609	151.388
759	84.5	133.512
760	81.833	133.512
761	82.485	257.31
762	105.786	118.345
763	84.5	61.8039
764	98.087	151.388
765	58	31.5946
766	82.158	138.198
767	127.25	61.8039
768	83.714	79.7885
769	80.769	112.838
770	79.034	171.127
771	100.839	174.808
772	74.754	239.365
773	74.737	138.198
774	80.25	61.8039
775	77	50.4627
776	76.5	50.4627
777	70.455	147.123
778	93.929	167.366
779	83	50.4627
780	95	31.5946
781	73.438	128.655
782	87.565	151.388
783	75.5	147.123
784	79	50.4627
785	83	100.925
786	72.389	231.249
787	83.333	133.512
788	92.125	178.412
789	85.071	118.345
790	69.714	79.7885
791	102.444	188.814
792	85.706	128.655
793	75.45	142.73
794	90.261	151.388
795	85.929	118.345
796	73.391	151.388
797	84.86	222.837
798	84.6	142.73
799	73.833	155.536
800	73.733	123.608
801	89.229	219.962
802	97.2	100.925
803	83	50.4627
804	73.292	155.536
805	104.816	195.441
806	112.875	128.655
807	93.04	159.577
808	77	79.7885
809	83.03	181.946
810	72	133.512
811	81	118.345
812	58	289.886
813	101.5	61.8039
814	85.333	79.7885
815	71.077	112.838
816	83.706	128.655
817	101.25	155.536
818	84.444	163.518
819	74.861	188.814
820	75	31.5946
821	92	31.5946
822	79.733	174.808
823	76.8	71.365
824	74	100.925
825	93.667	107.047
826	90.154	112.838
827	73	31.5946
828	68.2	142.73
829	80.925	198.672
830	78.612	219.962
831	82.692	159.577
832	76.975	198.672
833	102.76	222.837
834	79.241	328.976
835	88.917	155.536
836	78.6	71.365
837	87.615	198.672
838	74.778	133.512
839	89.045	147.123
840	74.946	192.156
841	77.939	313.113
842	83.286	79.7885
843	131.333	50.4627
844	87.698	208.063
845	86.462	198.672
846	70	31.5946
847	78.067	174.808
848	77.6	100.925
849	94.077	112.838
850	81	31.5946
851	68.625	128.655
852	65.25	107.047
853	84	128.655
854	86.632	138.198
855	87.75	142.73
856	77.892	192.156
857	75.941	128.655
858	81	50.4627
859	95.667	94.407
860	95.909	107.047
861	72	31.5946
862	69.643	118.345
863	83.81	142.73
864	92.7	100.925
865	73.083	155.536
866	82.143	79.7885
867	98	31.5946
868	72.273	147.123
869	86.818	147.123
870	82.238	142.73
871	99	61.8039
872	113.5	50.4627
873	84.5	79.7885
874	95.386	208.063
875	76.667	79.7885
876	89.708	155.536
877	88.5	50.4627
878	79.846	112.838
879	74.043	151.388
880	69.733	174.808
881	87.81	142.73
882	79.935	174.808
883	70.667	94.407
884	80.75	61.8039
885	74.571	79.7885
886	67.75	100.925
887	86.189	309.019
888	93.222	151.388
889	80.467	195.441
890	83.938	201.851
891	97.25	100.925
892	104.941	208.063
893	77.24	254.824
894	86.636	167.366
895	86.397	434.096
896	85.333	233.986
897	77.452	283.221
898	91.423	259.772
899	85.111	214.095
900	81.25	100.925
901	86.769	181.946
902	86.957	244.627
903	95	174.808
904	83.05	225.676
905	77.136	239.365
906	75.083	174.808
907	91	188.814
908	84	159.577
909	90.65	225.676
910	78.529	208.063
911	84.429	188.814
912	102.667	87.4039
913	95	142.73
914	77.5	100.925
915	69.333	123.608
916	98.062	201.851
917	78.5	100.925
918	103.857	133.512
919	95.909	167.366
920	117.4	159.577
921	77.286	133.512
922	94	123.608
923	101.364	167.366
924	115.5	142.73
925	79.429	133.512
926	85.611	214.095
927	89.75	225.676
928	96.963	264.628
929	87.875	142.73
930	93.667	214.095
931	78.889	214.095
932	97	123.608
933	85.389	214.095
934	86	151.388
935	82.2	159.577
936	91.66	369.102
937	89.75	100.925
938	93.963	264.628
939	82.286	133.512
940	92.5	100.925
941	108.233	278.689
942	82	87.4039
943	107.478	244.627
944	100.667	87.4039
945	98.585	459.737
946	91.571	133.512
947	81.286	133.512
948	75.5	159.577
949	98.4	254.824
950	85.053	219.962
951	89.071	269.397
952	89.867	195.441
953	110.333	151.388
954	101.682	239.365
955	87.364	336.628
956	88.175	321.142
957	93.545	239.365
958	86.125	142.73
959	95	385.965
960	108.3	159.577
961	125.857	133.512
962	81.888	454.164
963	91.829	325.083
964	88.366	325.083
965	84.286	188.814
966	86.667	87.4039
967	80.25	100.925
968	85.222	151.388
969	85.684	219.962
970	87.5	225.676
971	89.938	201.851
972	87.955	336.628
973	101.25	174.808
974	108.316	313.113
975	98.769	317.153
976	79.704	264.628
977	79.7	278.689
978	69.333	87.4039
979	83.7	159.577
980	86.583	174.808
981	88.091	167.366
982	85.353	208.063
983	94.25	225.676
984	87.077	181.946
985	78.615	181.946
986	88.2	195.441
987	90.778	304.871
988	89.56	254.824
989	94.062	201.851
990	103.545	167.366
991	96.767	278.689
992	87.429	133.512
993	93.5	225.676
994	102.457	300.666
995	89	87.4039
996	85.455	167.366
997	92	87.4039
998	89.111	214.095
999	88.75	225.676
1000	92.2	195.441
1001	82.8	112.838
1002	97.7	159.577
1003	81.75	142.73
1004	86.6	195.441
1005	93.533	195.441
1006	116.333	123.608
1007	83.667	174.808
1008	99.75	142.73
1009	93.385	181.946
1010	83	195.441
1011	80.867	195.441
1012	98.667	174.808
1013	84.857	133.512
1014	96.333	87.4039
1015	94.333	151.388
1016	83.692	181.946
1017	87.889	151.388
1018	98.333	123.608
1019	90.893	269.397
1020	99.368	219.962
1021	94.571	133.512
1022	97.613	283.221
1023	89.667	174.808
1024	83.8	112.838
1025	94	123.608
1026	106.625	201.851
1027	102.5	142.73
1028	90.071	188.814
1029	107.929	188.814
1030	87.696	244.627
1031	96.103	385.965
1032	115.7	159.577
1033	97.051	317.153
1034	89.821	269.397
1035	81	167.366
1036	101.167	123.608
1037	75.4	112.838
1038	100.653	355.036
1039	94.786	269.397
1040	74.4	112.838
1041	114.571	188.814
1042	83.048	328.976
1043	78.36	254.824
1044	83.212	292.074
1045	100.435	244.627
1046	97.667	87.4039
1047	86.487	317.153
1048	73.941	208.063
1049	124.286	133.512
1050	81.921	313.113
1051	92	167.366
1052	80.733	278.689
1053	91.85	225.676
1054	89.75	142.73
1055	128.6	112.838
1056	89.609	344.109
1057	98.5	174.808
1058	88.857	233.986
1059	85.214	269.397
1060	114.667	174.808
1061	94.043	244.627
1062	85.4	112.838
1063	89.667	292.074
1064	99.038	259.772
1065	102.25	174.808
1066	103.385	181.946
1067	95	159.577
1068	91.857	133.512
1069	104.903	283.221
1070	84.059	208.063
1071	96	151.388
1072	104.5	123.608
1073	88	225.676
1074	91.471	208.063
1075	81.667	151.388
1076	84.558	332.824
1077	91.333	87.4039
1078	95.062	287.681
1079	88.962	259.772
1080	96.25	100.925
1081	91.267	195.441
1082	81.81	233.986
1083	121.2	112.838
1084	93.375	201.851
1085	90.824	208.063
1086	78.161	283.221
1087	108.286	233.986
1088	82.353	208.063
1089	92.478	244.627
1090	87.268	325.083
1091	95.35	225.676
1092	124	142.73
1093	97.867	195.441
1094	100.625	201.851
1095	80.333	214.095
1096	76	112.838
1097	94	87.4039
1098	112.76	254.824
1099	90.5	188.814
1100	82.75	174.808
1101	96.75	201.851
1102	84.462	181.946
1103	105.786	188.814
1104	109	208.063
1105	85.5	188.814
1106	132.333	87.4039
1107	87	87.4039
1108	82.9	159.577
1109	82.043	344.109
1110	102.8	278.689
1111	87.688	201.851
1112	91.545	167.366
1113	82.154	181.946
1114	79.36	254.824
1115	71.9	225.676
1116	93.929	269.397
1117	74.769	181.946
1118	91.421	219.962
1119	82.4	195.441
1120	86.593	264.628
1121	88.667	123.608
1122	79.868	313.113
1123	97.321	269.397
1124	89.143	188.814
1125	86.077	181.946
1126	105.324	296.401
1127	90.667	195.441
1128	78.353	208.063
1129	97.722	214.095
1130	88.636	167.366
1131	79.625	201.851
1132	97.784	309.019
1133	85	181.946
1134	88.25	201.851
1135	89.229	351.432
1136	82.667	123.608
1137	116	100.925
1138	77.579	219.962
1139	108.444	304.871
1140	117.5	188.814
1141	107.833	214.095
1142	89.125	142.73
1143	81.6	112.838
1144	86.179	269.397
1145	74.2	159.577
1146	62.29	283.221
1147	67.25	174.808
1148	92.75	100.925
1149	76	100.925
1150	105.857	233.986
1151	91.923	181.946
1152	83.722	214.095
1153	79.333	278.689
1154	92.1	225.676
1155	78	133.512
1156	87.238	233.986
1157	93.667	174.808
1158	100.889	151.388
1159	73.778	151.388
1160	87.37	264.628
1161	81.256	332.824
1162	90.048	233.986
1163	81.242	292.074
1164	107.587	344.109
1165	85.648	476.064
1166	99.278	214.095
1167	98.8	195.441
1168	103.815	264.628
1169	79.2	112.838
1170	93.684	313.113
1171	82.481	365.637
1172	94.125	287.681
1173	87.609	244.627
1174	98.5	159.577
1175	102.154	181.946
1176	74.851	347.79
1177	70.286	133.512
1178	92.583	174.808
1179	73.75	100.925
1180	91.059	208.063
1181	84.667	87.4039
1182	94.312	201.851
1183	83.621	274.082
1184	82.268	325.083
1185	79.167	174.808
1186	80.789	219.962
1187	106	112.838
1188	99.4	159.577
1189	82	87.4039
1190	91.588	208.063
1191	97.778	151.388
1192	78.895	219.962
1193	92.357	269.397
1194	83.667	87.4039
1195	79.933	195.441
1196	90.947	219.962
1197	88.667	214.095
1198	98.405	328.976
1199	94.13	244.627
1200	94.333	123.608
1201	71.857	233.986
1202	91.429	188.814
1203	90.111	214.095
1204	81.923	259.772
1205	77.25	100.925
1206	85.25	100.925
1207	91	87.4039
1208	107.897	274.082
1209	112.2	112.838
1210	77.182	239.365
1211	93.966	274.082
1212	80.682	239.365
1213	100.182	167.366
1214	82.609	344.109
1215	87	142.73
1216	83.182	167.366
1217	84	112.838
1218	95.286	133.512
1219	81.25	142.73
1220	82.476	233.986
1221	106.857	188.814
1222	90.75	100.925
1223	83.065	283.221
1224	73.375	142.73
1225	90.08	254.824
1226	91.581	332.824
1227	98.267	195.441
1228	98.115	259.772
1229	81.154	259.772
1230	87.875	287.681
1231	111.043	244.627
1232	85.522	244.627
1233	101.286	133.512
1234	90.5	100.925
1235	98.8	195.441
1236	78.625	201.851
1237	96.52	254.824
1238	76.222	151.388
1239	87.867	278.689
1240	81.64	254.824
1241	89.595	328.976
1242	101.769	259.772
1243	93.917	249.777
1244	107.25	174.808
1245	109.182	167.366
1246	114.545	167.366
1247	98.148	264.628
1248	96.5	123.608
1249	110.133	195.441
1250	87.829	325.083
1251	77.222	151.388
1252	124.3	159.577
1253	112.947	219.962
1254	99	274.082
1255	74.7	225.676
1256	89.583	174.808
1257	75.25	100.925
1258	95.944	304.871
1259	94.75	100.925
1260	83	87.4039
1261	125.5	249.777
1262	81.983	392.507
1263	91.78	325.083
1264	83.692	181.946
1265	93.591	239.365
1266	90	87.4039
1267	110.889	151.388
1268	81.731	259.772
1269	89.95	321.142
1270	98.75	100.925
1271	98.194	283.221
1272	75.933	195.441
1273	99.111	151.388
1274	107.654	259.772
1275	90.769	181.946
1276	100.333	87.4039
1277	81.95	225.676
1278	109.667	87.4039
1279	94.045	239.365
1280	93.81	233.986
1281	88.062	287.681
1282	93.615	448.522
1283	97.25	100.925
1284	77.429	133.512
1285	86	123.608
1286	79.256	317.153
1287	88.763	313.113
1288	91.95	225.676
1289	100.762	233.986
1290	79.897	317.153
1291	94.234	347.79
1292	86	87.4039
1293	102.667	123.608
1294	90	382.652
1295	84.062	201.851
1296	93.333	174.808
1297	104.929	188.814
1298	89	87.4039
1299	87.297	309.019
1300	81.773	239.365
1301	92.545	167.366
1302	81.769	181.946
1303	83.7	225.676
1304	88.444	151.388
1305	83.839	283.221
1306	83.593	264.628
1307	92.818	167.366
1308	71.562	201.851
1309	102.837	332.824
1310	78.269	259.772
1311	81.917	174.808
1312	95.481	264.628
1313	96.5	123.608
1314	96.308	181.946
1315	95.789	219.962
1316	94.667	87.4039
1317	78.72	254.824
1318	82.129	283.221
1319	80.667	123.608
1320	103.29	283.221
1321	107.833	123.608
1322	74.12	254.824
1323	87.486	300.666
1324	74.2	278.689
1325	78.368	219.962
1326	102.75	100.925
1327	78.472	369.102
1328	81.231	181.946
1329	80.067	195.441
1330	77.333	151.388
1331	86.727	167.366
1332	74.5	201.851
1333	77.679	269.397
1334	93.526	219.962
1335	83.833	123.608
1336	68.812	201.851
1337	80.316	313.113
1338	89.269	259.772
1339	77.115	365.637
1340	86.96	358.605
1341	89.667	304.871
1342	98.267	195.441
1343	85.6	112.838
1344	82.07	332.824
1345	79.5	269.397
1346	109.375	249.777
1347	77.206	296.401
1348	89.143	188.814
1349	92.6	112.838
1350	91.5	100.925
1351	91.944	214.095
1352	76.286	133.512
1353	90.75	287.681
1354	83.455	292.074
1355	76.932	336.628
1356	74.605	313.113
1357	83.755	369.102
1358	94.261	244.627
1359	104.077	181.946
1360	104.917	174.808
1361	102.467	195.441
1362	91.968	283.221
1363	84.75	174.808
1364	100.105	219.962
1365	74.8	112.838
1366	83.915	347.79
1367	73.786	188.814
1368	120.667	174.808
1369	102.25	249.777
1370	80.25	100.925
1371	90.189	309.019
1372	70.75	269.397
1373	83.176	208.063
1374	88.833	123.608
1375	73.25	174.808
1376	93.462	317.153
1377	80.444	151.388
1378	116.607	269.397
1379	77	100.925
1380	80.708	409.961
1381	87.766	347.79
1382	83.692	181.946
1383	86.5	278.689
1384	86.25	142.73
1385	110.889	151.388
1386	82.413	439.923
1387	84.833	174.808
1388	90.026	313.113
1389	72	249.777
1390	82.95	225.676
1391	100.483	274.082
1392	85.4	195.441
1393	87	87.4039
1394	85	100.925
1395	75.949	317.153
1396	100.2	112.838
1397	95.556	151.388
1398	90.04	254.824
1399	89.478	244.627
1400	80.186	332.824
1401	107.833	123.608
1402	89.505	484.021
1403	86.556	151.388
1404	70.25	201.851
1405	76.867	195.441
1406	75.118	362.138
1407	85.423	259.772
1408	86.023	336.628
1409	91.72	254.824
1410	77.535	332.824
1411	88.929	379.31
1412	77.333	123.608
1413	81.714	133.512
1414	93.333	87.4039
1415	93.545	167.366
1416	86.312	406.843
1417	78.28	254.824
1418	86.8	195.441
1419	97.824	208.063
1420	85.5	123.608
1421	84.286	328.976
1422	80.36	254.824
1423	84.889	214.095
1424	75.895	219.962
1425	79.96	254.824
1426	77.929	188.814
1427	82.2	300.666
1428	83.593	264.628
1429	76.842	219.962
1430	70.524	233.986
1431	93.412	362.138
1432	75.781	287.681
1433	76.81	233.986
1434	85.139	304.871
1435	85.5	100.925
1436	93.375	142.73
1437	96.308	181.946
1438	90.857	233.986
1439	76.071	188.814
1440	73.086	300.666
1441	75.068	336.628
1442	77.5	188.814
1443	79.174	244.627
1444	83.609	244.627
1445	89.5	188.814
1446	75.027	309.019
1447	91.375	142.73
1448	74.182	167.366
1449	89.625	249.777
1450	116.625	201.851
1451	86.182	239.365
1452	100.286	133.512
1453	84.528	304.871
1454	71.444	264.628
1455	100.769	181.946
1456	87.6	112.838
1457	84.474	219.962
1458	84.2	112.838
1459	98.667	87.4039
1460	88.154	259.772
1461	104.174	244.627
1462	68.4	112.838
1463	93.036	269.397
1464	80.667	174.808
1465	94.525	321.142
1466	101	100.925
1467	115.438	201.851
1468	96.5	174.808
1469	94.25	225.676
1470	93.1	225.676
1471	96.667	87.4039
1472	107.714	133.512
1473	95.292	249.777
1474	100.651	332.824
1475	95.042	249.777
1476	84.143	133.512
1477	89.429	133.512
1478	90.3	225.676
1479	104.947	219.962
1480	93.167	174.808
1481	92.6	159.577
1482	97	214.095
1483	93.5	174.808
1484	111	167.366
1485	88.69	328.976
1486	93.889	214.095
1487	80.4	112.838
1488	103.444	214.095
1489	91.65	225.676
1490	109.6	112.838
1491	86.143	133.512
1492	70.143	133.512
1493	74.78	389.25
1494	94.667	123.608
1495	103.25	100.925
1496	89	123.608
1497	102.75	100.925
1498	82.571	269.397
1499	81	142.73
1500	75.684	219.962
1501	83.348	244.627
1502	108.438	201.851
1503	100.026	317.153
1504	86.231	181.946
1505	93.778	214.095
1506	80.167	123.608
1507	104.385	259.772
1508	79.143	133.512
1509	91.071	269.397
1510	81.556	151.388
1511	87.2	159.577
1512	111.053	219.962
1513	98.333	123.608
1514	82.846	259.772
1515	85.5	174.808
1516	81.75	142.73
1517	75.444	151.388
1518	108.111	151.388
1519	71.471	208.063
1520	118.345	274.082
1521	86.214	188.814
1522	101.65	225.676
1523	105.583	174.808
1524	95.3	159.577
1525	86.233	278.689
1526	83.091	239.365
1527	75.4	300.666
1528	80.633	278.689
1529	80	159.577
1530	82.4	159.577
1531	87.571	133.512
1532	72.5	100.925
1533	76.556	214.095
1534	98.571	188.814
1535	91.14	382.652
1536	108.333	195.441
1537	79.176	208.063
1538	70.333	195.441
1539	97.333	87.4039
1540	90.889	151.388
1541	102.727	167.366
1542	106.25	100.925
1543	91.662	419.174
1544	90	174.808
1545	74.5	174.808
1546	85.19	233.986
1547	98.742	283.221
1548	85.744	332.824
1549	90.143	133.512
1550	86.328	397.343
1551	100.571	188.814
1552	84.033	278.689
1553	82.273	167.366
1554	98.2	112.838
1555	87.5	100.925
1556	96.692	259.772
1557	96	112.838
1558	115.917	174.808
1559	116.267	195.441
1560	89.857	133.512
1561	86.308	181.946
1562	91	214.095
1563	96.857	233.986
1564	110.7	159.577
1565	79.75	100.925
1566	93.192	259.772
1567	85.196	344.109
1568	93	100.925
1569	78.857	188.814
1570	92.2	195.441
1571	89	112.838
1572	94.158	219.962
1573	104.5	188.814
1574	77	100.925
1575	83.6	159.577
1576	89.8	159.577
1577	97.938	201.851
1578	102.489	347.79
1579	101.071	379.31
1580	95.447	313.113
1581	93.842	219.962
1582	124.2	112.838
1583	110.263	219.962
1584	112.3	225.676
1585	96	413.055
1586	78.667	87.4039
1587	100	208.063
1588	95.185	264.628
1589	84.308	181.946
1590	90	174.808
1591	84.84	254.824
1592	77.882	208.063
1593	100.556	304.871
1594	104.429	233.986
1595	93.857	133.512
1596	86.614	336.628
1597	88.531	287.681
1598	108.455	167.366
1599	108.523	336.628
1600	101.238	233.986
1601	91.792	249.777
1602	91.966	274.082
1603	89.6	159.577
1604	79.667	87.4039
1605	99.217	244.627
1606	117.556	151.388
1607	115.385	181.946
1608	92.788	292.074
1609	84.444	151.388
1610	102.25	142.73
1611	96.111	214.095
1612	76	87.4039
1613	123.615	181.946
1614	96.75	249.777
1615	94.154	259.772
1616	106.163	332.824
1617	82.455	167.366
1618	81.071	188.814
1619	100.9	159.577
1620	96.143	188.814
1621	92.333	195.441
1622	96.324	296.401
1623	127.8	112.838
1624	90.462	181.946
1625	102.35	225.676
1626	91.967	278.689
1627	108.167	174.808
1628	106	239.365
1629	78.846	181.946
1630	88.105	219.962
1631	106.607	269.397
1632	83.1	159.577
1633	84.333	233.986
1634	99.367	278.689
1635	85.647	208.063
1636	113.583	174.808
1637	86.556	214.095
1638	89.667	87.4039
1639	89.824	208.063
1640	109.346	259.772
1641	100.333	87.4039
1642	86.65	225.676
1643	102.957	244.627
1644	84.571	133.512
1645	78.167	214.095
1646	104.462	181.946
1647	96.214	269.397
1648	67.208	249.777
1649	93.231	181.946
1650	92.647	208.063
1651	91.167	123.608
1652	93.308	181.946
1653	89.556	214.095
1654	91.5	100.925
1655	87.519	264.628
1656	98.8	112.838
1657	86.074	264.628
1658	97.353	208.063
1659	81.514	300.666
1660	82.548	283.221
1661	84.75	142.73
1662	92	123.608
1663	73.727	167.366
1664	80.154	181.946
1665	69.529	208.063
1666	80.538	181.946
1667	95.955	239.365
1668	107.778	151.388
1669	85.6	159.577
1670	82.667	87.4039
1671	90.941	208.063
1672	102.704	264.628
1673	91	174.808
1674	96.265	355.036
1675	78.857	133.512
1676	80.5	239.365
1677	87.306	304.871
1678	101.727	239.365
1679	90.75	100.925
1680	76.778	304.871
1681	91.429	133.512
1682	98.625	249.777
1683	107.093	332.824
1684	85.4	195.441
1685	84.459	309.019
1686	88.5	100.925
1687	72.857	133.512
1688	107.188	201.851
1689	93.029	300.666
1690	95.95	225.676
1691	84.833	174.808
1692	97.62	358.605
1693	92.275	321.142
1694	71.714	133.512
1695	96	100.925
1696	88.154	181.946
1697	78.333	123.608
1698	95.727	167.366
1699	70	100.925
1700	71.7	159.577
1701	93.4	112.838
1702	98.556	151.388
1703	83.167	174.808
1704	90.433	278.689
1705	89.556	304.871
1706	83.75	100.925
1707	87.222	214.095
1708	105.2	112.838
1709	90.571	300.666
1710	92.267	195.441
1711	106.8	112.838
1712	121.556	151.388
1713	104.9	159.577
1714	85.727	239.365
1715	109.333	292.074
1716	102.875	201.851
1717	95.286	133.512
1718	79	159.577
1719	78.783	244.627
1720	88.75	142.73
1721	92.625	142.73
1722	111.6	159.577
1723	90.167	123.608
1724	86.739	344.109
1725	85.273	167.366
1726	90.444	214.095
1727	101.688	201.851
1728	84.109	375.938
1729	103.391	244.627
1730	89.8	321.142
1731	100.2	278.689
1732	98.7	225.676
1733	89.375	142.73
1734	87.4	112.838
1735	86.1	159.577
1736	83.542	351.432
1737	98.85	225.676
1738	80.2	195.441
1739	78.5	159.577
1740	76.25	142.73
1741	82.5	313.113
1742	94.417	174.808
1743	95.739	244.627
1744	98.357	269.397
1745	80.75	174.808
1746	82.111	264.628
1747	64.483	274.082
1748	59.308	181.946
1749	85.053	219.962
1750	76.667	87.4039
