# Supplementary material for: Rational optimization of a transcription factor activation domain inhibitor
Source: Nat Struct Mol Biol. 2023 Dec 4;30(12):1958–69. doi: 10.1038/s41594-023-01159-5 (PMC10716049; doi:10.1038/s41594-023-01159-5)
Supplement: Supplementary file 20 — Statistical source data. [file 41594_2023_1159_MOESM20_ESM.xlsx]

## Sheet: EDF2B
Top plot				Bottom plot
mean	stdev	condition		mean	stdev	condition
8928850958	1205587915	ARDBDCE3 DHT		7987926356	189951297	ARV7_noDHT
901696861	1336645309	ARDBDCE3 DHT		6980515529	1559577078	ARV7_noDHT
1097203061	1699696864	ARDBDCE3 DHT		8976886068	2485465403	ARV7_noDHT
1139875171	2102216233	ARDBDCE3 DHT		6090823239	1197694747	ARV7_noDHT
9986244157	1330898057	ARDBDCE3 DHT		1342278466	6307231056	ARV7_noDHT
1064098509	1674138305	ARDBDCE3 DHT		1047987135	3473768635	ARV7_noDHT
111796567	1990971055	ARDBDCE3 DHT		411233174	1120439412	ARV7_noDHT
8214344144	1130942957	ARDBDCE3 DHT		5496794122	1545439389	ARV7_noDHT
8581234228	1250020552	ARDBDCE3 DHT		3342997512	7778151902	ARV7_noDHT
1002932645	1658191303	ARDBDCE3 DHT		5265608371	1361177007	ARV7_noDHT
9290389771	1498434187	ARDBDCE3 DHT		7722118043	3335312766	ARV7_noDHT
1193762594	2051900536	ARDBDCE3 DHT		6455092532	241578692	ARV7_noDHT
1013480056	1708108177	ARDBDCE3 DHT		5412183593	1562467544	ARV7_noDHT
8649987112	1280504325	ARDBDCE3 DHT		5705399923	1517878413	ARV7_noDHT
9964965301	2040372741	ARDBDCE3 DHT		6753806168	2772637004	ARV7_noDHT
1170905779	2219368591	ARDBDCE3 DHT		4132854934	9866303599	ARV7_noDHT
8886087622	1165787243	ARDBDCE3 DHT		3374203665	8046954037	ARV7_noDHT
1037443647	1812176562	ARDBDCE3 DHT		1096602278	4107106833	ARV7_noDHT
9906160026	1653580048	ARDBDCE3 DHT		6168164055	1471137236	ARV7_noDHT
9518404637	1547935852	ARDBDCE3 DHT		4419047619	9785062616	ARV7_noDHT
1089675199	2051136703	ARDBDCE3 DHT		4151252215	885910215	ARV7_noDHT
9608172445	1347272228	ARDBDCE3 DHT		5125479456	113184144	ARV7_noDHT
891291863	1344708611	ARDBDCE3 DHT		443122132	9731883672	ARV7_noDHT
1037122611	1956981695	ARDBDCE3 DHT		1044463124	346553485	ARV7_noDHT
1114529512	1794480427	ARDBDCE3 DHT		7203674728	2049521421	ARV7_noDHT
892094249	159008486	ARDBDCE3 DHT		4039723641	8567498139	ARV7_noDHT
9635148924	1419133837	ARDBDCE3 DHT		3886176236	802371675	ARV7_noDHT
9787133302	1341822889	ARDBDCE3 DHT		3832888631	8161741918	ARV7_noDHT
1118405429	1652495418	ARDBDCE3 DHT		9717082558	3363969213	ARV7_noDHT
8899179943	1383566268	ARDBDCE3 DHT		5568951369	1243159281	ARV7_noDHT
8519248052	1431904805	ARDBDCE3 DHT		5182246253	1134768131	ARV7_noDHT
9184472656	1785883308	ARDBDCE3 DHT		7095012375	18317055	ARV7_noDHT
1015079895	1891011208	ARDBDCE3 DHT		5328119557	1167455336	ARV7_noDHT
8567240133	1388283411	ARDBDCE3 DHT		4706723716	1052822747	ARV7_noDHT
7945110163	113584178	ARDBDCE3 DHT		4281255117	8435433281	ARV7_noDHT
3087715082	1067799803	ARFL_DHT		1382783533	4960561112	ARV7_noDHT
4134386165	1454578092	ARFL_DHT		5155544839	1121470218	ARV7_noDHT
3885482624	1472609671	ARFL_DHT		1266935714	4794762307	ARV7_noDHT
6911333828	6355707795	ARFL_DHT		1124999465	3465085041	ARV7_noDHT
314376657	1096088192	ARFL_DHT		502215777	1020112228	ARV7_noDHT
5048642072	2384992004	ARFL_DHT		5944855053	1320458851	ARV7_noDHT
3007889608	9780912492	ARFL_DHT		5306892963	117521792	ARV7_noDHT
4139241116	1604884007	ARFL_DHT		6940923081	1759283426	ARV7_noDHT
7512955501	7888018227	ARFL_DHT		8093044059	2148855572	ARV7_noDHT
2968936709	910797737	ARFL_DHT		6886146828	1986767039	ARV7_noDHT
4887487761	195998065	ARFL_DHT		8370270454	2725100223	ARV7_noDHT
3391786603	1976187509	ARFL_DHT		7040463744	1743050821	ARV7_noDHT
5820029015	270699802	ARFL_DHT		5239920207	1131717847	ARV7_noDHT
3396954947	1187683106	ARFL_DHT		594864619	1433158461	ARV7_noDHT
3207649219	1087837501	ARFL_DHT		1047972381	3027088931	ARV7_noDHT
4500404709	2582557738	ARFL_DHT		7733752448	2018193392	ARV7_noDHT
2945092664	9375924818	ARFL_DHT		9365589155	2199871731	ARV7_noDHT
3004247309	1057872971	ARFL_DHT		5796313577	1135449512	ARV7_noDHT
4461460862	1667932006	ARFL_DHT		6617213159	1309907692	ARV7_noDHT
3108488155	1027854677	ARFL_DHT		922561728	2367037078	ARV7_noDHT
6936154728	7135457436	ARFL_DHT		9156279982	2464898136	ARV7_noDHT
6461233284	5558625066	ARFL_DHT		7213747069	1622606283	ARV7_noDHT
2140702138	7919836421	ARFL_DHT		5121178629	9651632354	ARV7_noDHT
3806911681	1785733104	ARFL_DHT		5236423899	9684868313	ARV7_noDHT
3325774502	1412611038	ARFL_DHT		1070157785	3053349725	ARV7_noDHT
1965981048	6806765904	ARFL_DHT		5353411744	1059230289	ARV7_noDHT
2945089125	1252247519	ARFL_DHT		1098880598	369839888	ARV7_noDHT
245065358	1180269093	ARFL_DHT		1465629447	5357051688	ARV7_noDHT
2617150731	1282372585	ARFL_DHT		5983351175	1263495616	ARV7_noDHT
2070551081	116975469	ARFL_DHT		8123254987	1873911954	ARV7_noDHT
1706566701	5830340669	ARFL_DHT		5538230724	1047630381	ARV7_noDHT
1932449599	6932400255	ARFL_DHT		6643816254	1518896434	ARV7_noDHT
2971517108	1194096834	ARFL_DHT		5287135114	1097407272	ARV7_noDHT
1975746513	6680534226	ARFL_DHT		5221488061	1058290263	ARV7_noDHT
2353112526	8496770048	ARFL_DHT		6979354904	2159972191	ARV7_noDHT
2978768245	1295368909	ARFL_DHT		9332119507	2986420764	ARV7_noDHT
1874970444	6707730508	ARFL_DHT		1067881624	3240239438	ARV7_noDHT
3658548891	1971733871	ARFL_DHT		9768885433	3164014995	ARV7_noDHT
2725919788	1111692518	ARFL_DHT		7259344878	1544166769	ARV7_noDHT
3297469954	1276752245	ARFL_DHT		6620256253	1509627907	ARV7_noDHT
2963285348	1516663851	ARFL_DHT		1250870869	4444267878	ARV7_noDHT
2181247178	9601920145	ARFL_DHT		10943388	460207603	ARV7_noDHT
1949437113	7421304716	ARFL_DHT		6653058114	1491721306	ARV7_noDHT
2640006811	1802435807	ARFL_DHT		6604156319	1490576657	ARV7_noDHT
2928779708	1216480906	ARFL_DHT		1017742514	3362049953	ARV7_noDHT
7636191615	7634451257	ARFL_DHT		1774889283	5683630893	ARV7_noDHT
3507116015	1064642678	ARFL_DHT		1627315426	5357303893	ARV7_noDHT
3027534753	900268307	ARFL_DHT		7209567567	1270535357	ARV7_noDHT
3441502569	1181253488	ARFL_DHT		6768255844	1180141425	ARV7_noDHT
3616069791	1305421078	ARFL_DHT		1781762811	5018109848	ARV7_noDHT
3163434022	1010474954	ARFL_DHT		7945086509	1584426992	ARV7_noDHT
1002581153	9465424567	ARFL_DHT		8038549911	149204127	ARV7_noDHT
3800624833	1365845996	ARFL_DHT		8075123291	1410858272	ARV7_noDHT
3724908256	1274419591	ARFL_DHT		1459628257	4458085157	ARV7_noDHT
3195774323	9481607016	ARFL_DHT		1867065808	4619343855	ARV7_DHT
3562739544	1388056225	ARFL_DHT		8820236609	1406486406	ARV7_DHT
9802620458	8771946026	ARFL_DHT		3801812977	8382106859	ARV7_DHT
3231295931	9088597054	ARFL_DHT		4418759129	8864722547	ARV7_DHT
4054111132	1496379139	ARFL_DHT		3798583587	8548786167	ARV7_DHT
6459751973	5592131879	ARFL_DHT		5143614132	1210180619	ARV7_DHT
3343334405	1013715893	ARFL_DHT		4034189196	8533402853	ARV7_DHT
3009267137	9641376438	ARFL_DHT		1034510765	3329492084	ARV7_DHT
7966457363	3789242524	ARFL_DHT		4089272202	8855619416	ARV7_DHT
4534478751	1879770656	ARFL_DHT		434974251	9161922891	ARV7_DHT
3731190686	1370127474	ARFL_DHT		3515977917	7604093291	ARV7_DHT
3435296862	1038284684	ARFL_DHT		4130521607	8772124902	ARV7_DHT
4373266546	1666183837	ARFL_DHT		3724431312	798856531	ARV7_DHT
4190055012	1575815473	ARFL_DHT		3772876188	7964584225	ARV7_DHT
3768246889	1430114102	ARFL_DHT		4253146422	9364666022	ARV7_DHT
3819497077	2110011962	ARFL_DHT		6581946462	1723462794	ARV7_DHT
2712457134	8599106469	ARFL_DHT		378260793	8033354806	ARV7_DHT
5652851658	3092063096	ARFL_DHT		3774414403	8523285436	ARV7_DHT
326026806	1091192267	ARFL_DHT		5146582853	1336887856	ARV7_DHT
2571539947	8534545819	ARFL_DHT		1173151656	4688343732	ARV7_DHT
2632392416	8246359462	ARFL_DHT		115387531	5146101039	ARV7_DHT
3521752236	131824246	ARFL_DHT		473907152	1003708525	ARV7_DHT
3498355673	1512919015	ARFL_DHT		4471622879	8900311169	ARV7_DHT
6184788636	5567794882	ARFL_DHT		477503903	1064830393	ARV7_DHT
3375429687	1214666614	ARFL_DHT		9103799202	3005697126	ARV7_DHT
7011802591	4271159814	ARFL_DHT		4014410574	9005923093	ARV7_DHT
3096441153	1228499257	ARFL_DHT		6009254288	1779328203	ARV7_DHT
4229505349	1656272963	ARFL_DHT		7713001036	2354773838	ARV7_DHT
6394075634	3119514534	ARFL_DHT		5282202112	2860359315	ARV7_DHT
2975459103	9603513739	ARFL_DHT		42395179	9713754794	ARV7_DHT
8230060322	478794022	ARFL_DHT		6825601127	3461972491	ARV7_DHT
519889813	3065142723	ARFL_DHT		3692587865	8154103262	ARV7_DHT
3412910741	1108651783	ARFL_DHT		7447111598	2137926746	ARV7_DHT
3958644951	1906390273	ARFL_DHT		6842849951	176107713	ARV7_DHT
4238129828	1684311348	ARFL_DHT		1009408356	3009512215	ARV7_DHT
8820236609	1406486406	ARV7_DHT		5017628679	9751249507	ARV7_DHT
3801812977	8382106859	ARV7_DHT		6928234949	1637900155	ARV7_DHT
4418759129	8864722547	ARV7_DHT		5798552387	1218598571	ARV7_DHT
3798583587	8548786167	ARV7_DHT		7452201875	2227477712	ARV7_DHT
5143614132	1210180619	ARV7_DHT		8101581056	2345762869	ARV7_DHT
4034189196	8533402853	ARV7_DHT		438946494	9048776673	ARV7_DHT
1034510765	3329492084	ARV7_DHT		601552103	1369779117	ARV7_DHT
4089272202	8855619416	ARV7_DHT		4324325406	8518640818	ARV7_DHT
434974251	9161922891	ARV7_DHT		4688729346	1104449578	ARV7_DHT
3515977917	7604093291	ARV7_DHT		5604152147	1274501855	ARV7_DHT
4130521607	8772124902	ARV7_DHT		5642136905	1920137574	ARV7_DHT
3724431312	798856531	ARV7_DHT		5597654012	1443582831	ARV7_DHT
3772876188	7964584225	ARV7_DHT		5731971092	1342855761	ARV7_DHT
4253146422	9364666022	ARV7_DHT		1024753424	3424183197	ARV7_DHT
6581946462	1723462794	ARV7_DHT		7923429869	2108619434	ARV7_DHT
378260793	8033354806	ARV7_DHT		102026451	3731009025	ARV7_DHT
3774414403	8523285436	ARV7_DHT		4517188981	9212946987	ARV7_DHT
5146582853	1336887856	ARV7_DHT		4932147994	1401499782	ARV7_DHT
1173151656	4688343732	ARV7_DHT		5808989482	1567346147	ARV7_DHT
115387531	5146101039	ARV7_DHT		2957057318	6717058435	ARV7_DHT
473907152	1003708525	ARV7_DHT		5181783739	1294167639	ARV7_DHT
4471622879	8900311169	ARV7_DHT		1074261031	4003705609	ARV7_DHT
477503903	1064830393	ARV7_DHT		5977093637	1884760164	ARV7_DHT
9103799202	3005697126	ARV7_DHT		8269415915	3420295901	ARV7_DHT
4014410574	9005923093	ARV7_DHT		6679106542	2044067546	ARV7_DHT
6009254288	1779328203	ARV7_DHT		6214431772	1992443933	ARV7_DHT
7713001036	2354773838	ARV7_DHT		342715542	7849652225	ARV7_DHT
5282202112	2860359315	ARV7_DHT		4607072064	1028689039	ARV7_DHT
42395179	9713754794	ARV7_DHT		9818910892	3602018572	ARV7_DHT
6825601127	3461972491	ARV7_DHT		4256013629	1131398789	ARV7_DHT
3692587865	8154103262	ARV7_DHT		3227317708	7686929346	ARV7_DHT
7447111598	2137926746	ARV7_DHT		4090327294	9197345188	ARV7_DHT
6842849951	176107713	ARV7_DHT		3203565964	7181784799	ARV7_DHT
1009408356	3009512215	ARV7_DHT		4162326397	9278237079	ARV7_DHT
5017628679	9751249507	ARV7_DHT		8728800041	3545266849	ARV7_DHT
6928234949	1637900155	ARV7_DHT		3668867861	8290179632	ARV7_DHT
5798552387	1218598571	ARV7_DHT		3367143379	7616038422	ARV7_DHT
7452201875	2227477712	ARV7_DHT		6618733513	1599315551	ARV7_DHT
8101581056	2345762869	ARV7_DHT		5859082148	1573989556	ARV7_DHT
438946494	9048776673	ARV7_DHT		4217589148	877275854	ARV7_DHT
601552103	1369779117	ARV7_DHT		8350646842	3578863159	ARV7_DHT
4324325406	8518640818	ARV7_DHT		7586500741	2146561912	ARV7_DHT
4688729346	1104449578	ARV7_DHT		4793139794	1316884394	ARV7_DHT
5604152147	1274501855	ARV7_DHT		5697678696	1398022734	ARV7_DHT
5642136905	1920137574	ARV7_DHT		6215830244	1978736727	ARV7_DHT
5597654012	1443582831	ARV7_DHT		8465799465	3347835974	ARV7_DHT
5731971092	1342855761	ARV7_DHT		6576191807	1949539533	ARV7_DHT
1024753424	3424183197	ARV7_DHT		5985806806	1777322875	ARV7_DHT
7923429869	2108619434	ARV7_DHT		3306097788	7280314181	ARV7_DHT
102026451	3731009025	ARV7_DHT		9734353854	3432381126	ARV7_DHT
4517188981	9212946987	ARV7_DHT		4562435464	109557445	ARV7_DHT
4932147994	1401499782	ARV7_DHT		324090723	777879514	ARV7_DHT
5808989482	1567346147	ARV7_DHT		3849696852	8753772912	ARV7_DHT
2957057318	6717058435	ARV7_DHT		5397646352	1600194531	ARV7_DHT
5181783739	1294167639	ARV7_DHT		3130797594	7027291669	ARV7_DHT
1074261031	4003705609	ARV7_DHT		4026337162	8726833194	ARV7_DHT
5977093637	1884760164	ARV7_DHT		3535275395	7934058211	ARV7_DHT
8269415915	3420295901	ARV7_DHT		8778767046	3403664457	ARV7_DHT
6679106542	2044067546	ARV7_DHT		4479760281	9872800013	ARV7_DHT
6214431772	1992443933	ARV7_DHT		8100383307	4043447141	ARV7_DHT
342715542	7849652225	ARV7_DHT		3315644729	7461068871	ARV7_DHT
4607072064	1028689039	ARV7_DHT
9818910892	3602018572	ARV7_DHT
4256013629	1131398789	ARV7_DHT
3227317708	7686929346	ARV7_DHT
4090327294	9197345188	ARV7_DHT
3203565964	7181784799	ARV7_DHT
4162326397	9278237079	ARV7_DHT
8728800041	3545266849	ARV7_DHT
3668867861	8290179632	ARV7_DHT
3367143379	7616038422	ARV7_DHT
6618733513	1599315551	ARV7_DHT
5859082148	1573989556	ARV7_DHT
4217589148	877275854	ARV7_DHT
8350646842	3578863159	ARV7_DHT
7586500741	2146561912	ARV7_DHT
4793139794	1316884394	ARV7_DHT
5697678696	1398022734	ARV7_DHT
6215830244	1978736727	ARV7_DHT
8465799465	3347835974	ARV7_DHT
6576191807	1949539533	ARV7_DHT
5985806806	1777322875	ARV7_DHT
3306097788	7280314181	ARV7_DHT
9734353854	3432381126	ARV7_DHT
4562435464	109557445	ARV7_DHT
324090723	777879514	ARV7_DHT
3849696852	8753772912	ARV7_DHT
5397646352	1600194531	ARV7_DHT
3130797594	7027291669	ARV7_DHT
4026337162	8726833194	ARV7_DHT
3535275395	7934058211	ARV7_DHT
8778767046	3403664457	ARV7_DHT
4479760281	9872800013	ARV7_DHT
8100383307	4043447141	ARV7_DHT
3315644729	7461068871	ARV7_DHT

## Sheet: EDF2D
NMR average I/I25
amino acid type	average I/I25
A	0.773489
R	0.830394
N	0.81028
D	0.835984
C	0.870971
E	0.835099
Q	0.805939
G	0.791179
H	0.807061
I	0.752101
L	0.784515
K	0.844722
M	0.794537
F	0.791072
S	0.822724
T	0.786887
W	0.643317
Y	0.707484
V	0.756047

## Sheet: EDF2E
intrinsic residue solubility
	L	P
F	-0.028223	0.517284
Q	-1.18569	-0.640186
N	-1.28976	-0.744257
L/P	-1.14328	-0.597777
F	-1.09402	-0.548515
Q	-0.591535	-0.046028

## Sheet: EDF2G
light scattering
	P	L
320	-1.25707	-4.55131
320.5	-0.336569	54.1994
321	0.340904	96.912
321.5	1.72051	185.41
322	3.37054	298.061
322.5	6.58843	493.703
323	9.94302	722.256
323.5	14.9377	1027.37
324	20.1975	1370.5
324.5	27.2321	1816.79
325	34.6929	2291.72
325.5	42.638	2801.36
326	50.7581	3287.29
326.5	58.4516	3792.54
327	65.6152	4195.55
327.5	70.4621	4551.07
328	73.6968	4724.26
328.5	75.1344	4816.26
329	74.4482	4759.02
329.5	71.8825	4596.79
330	67.0613	4334.92
330.5	60.8538	3925.29
331	53.7104	3490.49
331.5	45.5628	2959.58
332	37.7965	2464.4
332.5	29.7311	1946.42
333	22.9062	1509.87
333.5	16.9149	1126.52
334	12.0993	813.558
334.5	7.9354	557
335	4.91374	357.04
335.5	2.6569	220.356
336	1.17169	127.628
336.5	0.0875247	68.5058
337	-0.55658	33.5041
337.5	-0.87448	15.3447
338	-0.954467	7.3596
338.5	-1.01925	4.05592
339	-1.03616	2.79906
339.5	-1.03128	2.37243
340	-1.04219	2.21654

## Sheet: EDF2H
wavelength	1613.81	1624.73	1639.42	1658.26	1670.68	1682.27	suma
1570	1.37972e-16	8.8987e-24	2.0671e-37	2.98002e-58	2.65425e-75	1.04317e-93	1.37972e-16
1571	5.75853e-16	5.32522e-23	2.00839e-36	5.39046e-57	7.23287e-74	4.16689e-92	5.75854e-16
1572	2.32545e-15	3.08334e-22	1.88802e-35	9.43419e-56	1.907e-72	1.61043e-90	2.32545e-15
1573	9.08601e-15	1.72734e-21	1.71727e-34	1.59756e-54	4.86479e-71	6.02203e-89	9.08602e-15
1574	3.43489e-14	9.36277e-21	1.51127e-33	2.61746e-53	1.20074e-69	2.1788e-87	3.43489e-14
1575	1.25639e-13	4.91026e-20	1.28682e-32	4.14931e-52	2.86753e-68	7.62717e-86	1.25639e-13
1576	4.44639e-13	2.49159e-19	1.06015e-31	6.3642e-51	6.62579e-67	2.58334e-84	4.44639e-13
1577	1.52252e-12	1.22327e-18	8.45058e-31	9.44462e-50	1.48129e-65	8.46589e-83	1.52252e-12
1578	5.04419e-12	5.81084e-18	6.51747e-30	1.35612e-48	3.20416e-64	2.68433e-81	5.0442e-12
1579	1.61693e-11	2.67072e-17	4.86345e-29	1.88401e-47	6.70597e-63	8.23513e-80	1.61694e-11
1580	5.01493e-11	1.18765e-16	3.51141e-28	2.53244e-46	1.35794e-61	2.44443e-78	5.01494e-11
1581	1.50491e-10	5.11004e-16	2.45296e-27	3.29359e-45	2.66055e-60	7.02034e-77	1.50491e-10
1582	4.36946e-10	2.12731e-15	1.65796e-26	4.14449e-44	5.04354e-59	1.95079e-75	4.36948e-10
1583	1.22749e-09	8.56857e-15	1.08424e-25	5.04598e-43	9.25064e-58	5.24487e-74	1.2275e-09
1584	3.33641e-09	3.33933e-14	6.86047e-25	5.94417e-42	1.64165e-56	1.36437e-72	3.33644e-09
1585	8.77431e-09	1.25916e-13	4.20003e-24	6.77501e-41	2.81877e-55	3.434e-71	8.77444e-09
1586	2.23264e-08	4.59386e-13	2.48785e-23	7.47139e-40	4.68288e-54	8.3626e-70	2.23269e-08
1587	5.49665e-08	1.6216e-12	1.42583e-22	7.97195e-39	7.52728e-53	1.9704e-68	5.49681e-08
1588	1.30933e-07	5.53841e-12	7.90646e-22	8.23e-38	1.17067e-51	4.49201e-67	1.30939e-07
1589	3.01767e-07	1.83019e-11	4.24199e-21	8.22068e-37	1.76159e-50	9.90828e-66	3.01786e-07
1590	6.72927e-07	5.85169e-11	2.20206e-20	7.94489e-36	2.56476e-49	2.1146e-64	6.72985e-07
1591	1.4519e-06	1.81025e-10	1.10602e-19	7.42917e-35	3.61294e-48	4.36648e-63	1.45208e-06
1592	3.03093e-06	5.41835e-10	5.37486e-19	6.72148e-34	4.92433e-47	8.72381e-62	3.03147e-06
1593	6.12193e-06	1.56916e-09	2.52722e-18	5.88385e-33	6.49391e-46	1.68637e-60	6.12349e-06
1594	1.19639e-05	4.39685e-09	1.14972e-17	4.98346e-32	8.28585e-45	3.15408e-59	1.19683e-05
1595	2.26219e-05	1.19203e-08	5.06075e-17	4.08387e-31	1.02292e-43	5.70774e-58	2.26338e-05
1596	4.13865e-05	3.12684e-08	2.1553e-16	3.23807e-30	1.22184e-42	9.99375e-57	4.14178e-05
1597	7.32589e-05	7.93589e-08	8.88125e-16	2.48412e-29	1.41209e-41	1.69303e-55	7.33382e-05
1598	0.000125468	1.94876e-07	3.54089e-15	1.84387e-28	1.57901e-40	2.77506e-54	0.000125663
1599	0.000207912	4.63013e-07	1.36591e-14	1.32422e-27	1.70835e-39	4.40102e-53	0.000208375
1600	0.000333348	1.06439e-06	5.09807e-14	9.20161e-27	1.7883e-38	6.75316e-52	0.000334413
1601	0.000517117	2.36744e-06	1.84103e-13	6.18641e-26	1.81125e-37	1.00261e-50	0.000519484
1602	0.000776161	5.09485e-06	6.43263e-13	4.02426e-25	1.77495e-36	1.44022e-49	0.000781255
1603	0.00112716	1.06085e-05	2.17464e-12	2.53283e-24	1.68294e-35	2.0017e-48	0.00113777
1604	0.00158378	2.13723e-05	7.11312e-12	1.5424e-23	1.54391e-34	2.69179e-47	0.00160515
1605	0.00215315	4.16601e-05	2.25115e-11	9.08787e-23	1.3704e-33	3.50232e-46	0.00219481
1606	0.00283221	7.85707e-05	6.8932e-11	5.18082e-22	1.17692e-32	4.40903e-45	0.00291078
1607	0.00360454	0.000143375	2.04225e-10	2.85764e-21	9.77951e-32	5.37034e-44	0.00374792
1608	0.0044386	0.000253139	5.85424e-10	1.52506e-20	7.86248e-31	6.32897e-43	0.00469174
1609	0.00528829	0.000432431	1.62369e-09	7.87484e-20	6.1161e-30	7.21667e-42	0.00572072
1610	0.00609616	0.000714737	4.35722e-09	3.9343e-19	4.60323e-29	7.96182e-41	0.0068109
1611	0.00679938	0.00114301	1.13132e-08	1.9018e-18	3.35214e-28	8.49886e-40	0.0079424
1612	0.00733762	0.00176857	2.84209e-08	8.89478e-18	2.36186e-27	8.7777e-39	0.00910622
1613	0.00766148	0.00264771	6.90812e-08	4.02511e-17	1.61012e-26	8.77149e-38	0.0103093
1614	0.00774004	0.00383521	1.62463e-07	1.76235e-16	1.06202e-25	8.48083e-37	0.0115754
1615	0.00756564	0.00537502	3.69676e-07	7.46585e-16	6.77772e-25	7.9337e-36	0.012941
1616	0.00715517	0.00728859	8.1388e-07	3.06012e-15	4.18509e-24	7.181e-35	0.0144446
1617	0.00654737	0.00956267	1.73369e-06	1.21358e-14	2.50033e-23	6.28878e-34	0.0161118
1618	0.00579677	0.0121391	3.57319e-06	4.65665e-14	1.44532e-22	5.32869e-33	0.0179395
1619	0.00496567	0.0149097	7.12544e-06	1.72882e-13	8.08353e-22	4.36865e-32	0.0198825
1620	0.00411568	0.0177182	1.3748e-05	6.21009e-13	4.37433e-21	3.46534e-31	0.0218477
1621	0.00330048	0.0203725	2.5665e-05	2.15833e-12	2.29031e-20	2.6596e-30	0.0236987
1622	0.00256086	0.0226643	4.63568e-05	7.25791e-12	1.16024e-19	1.97497e-29	0.0252715
1623	0.0019225	0.0243956	8.10138e-05	2.36144e-11	5.6869e-19	1.41898e-28	0.0263991
1624	0.00139643	0.025407	0.000136986	7.43386e-11	2.69696e-18	9.86422e-28	0.0269404
1625	0.000981397	0.0256016	0.000224112	2.26425e-10	1.2375e-17	6.63472e-27	0.0268071
1626	0.000667332	0.0249605	0.000354755	6.67277e-10	5.49402e-17	4.31772e-26	0.0259826
1627	0.000439048	0.0235457	0.000543328	1.90266e-09	2.35997e-16	2.71869e-25	0.0245281
1628	0.000279482	0.0214903	0.000805135	5.24912e-09	9.80831e-16	1.65629e-24	0.022575
1629	0.000172135	0.0189778	0.00115438	1.40115e-08	3.94416e-15	9.76304e-24	0.0203043
1630	0.000102578	0.0162152	0.0016014	3.61873e-08	1.53457e-14	5.56809e-23	0.0179192
1631	5.91444e-05	0.0134051	0.00214942	9.04274e-08	5.77688e-14	3.07256e-22	0.0156137
1632	3.29947e-05	0.0107223	0.00279137	2.18633e-07	2.10412e-13	1.64046e-21	0.0135469
1633	1.78093e-05	0.00829815	0.0035074	5.11451e-07	7.41515e-13	8.4743e-21	0.0118239
1634	9.30087e-06	0.00621364	0.00426408	1.15761e-06	2.52838e-12	4.23559e-20	0.0104882
1635	4.69971e-06	0.00450176	0.00501578	2.53511e-06	8.34135e-12	2.04832e-19	0.00952478
1636	2.29769e-06	0.00315567	0.00570851	5.37157e-06	2.66258e-11	9.58411e-19	0.00887185
1637	1.08689e-06	0.00214029	0.00628608	1.10123e-05	8.22322e-11	4.3389e-18	0.00843847
1638	4.97449e-07	0.00140452	0.00669745	2.18438e-05	2.45727e-10	1.90055e-17	0.0081243
1639	2.20285e-07	0.000891769	0.00690416	4.19227e-05	7.10454e-10	8.05472e-17	0.00783807
1640	9.43833e-08	0.000547836	0.00688628	7.78472e-05	1.98743e-09	3.30289e-16	0.00751206
1641	3.9127e-08	0.000325627	0.00664555	0.000139865	5.37923e-09	1.31042e-15	0.00711108
1642	1.56939e-08	0.000187268	0.00620511	0.000243135	1.4087e-08	5.03036e-15	0.00663554
1643	6.09055e-09	0.000104203	0.00560583	0.000408938	3.56938e-08	1.86836e-14	0.00611901
1644	2.28694e-09	5.61004e-05	0.00490008	0.000665489	8.75059e-08	6.71419e-14	0.00562175
1645	8.30856e-10	2.9223e-05	0.00414417	0.00104784	2.07565e-07	2.33453e-13	0.00522145
1646	2.92058e-10	1.47285e-05	0.00339114	0.00159633	4.76369e-07	7.85374e-13	0.00500268
1647	9.93308e-11	7.18226e-06	0.00268488	0.00235301	1.0578e-06	2.55639e-12	0.00504613
1648	3.26867e-11	3.38874e-06	0.00205673	0.00335579	2.27268e-06	8.05098e-12	0.00541819
1649	1.04071e-11	1.54699e-06	0.00152441	0.00463063	4.72438e-06	2.45326e-11	0.00616131
1650	3.206e-12	6.83293e-07	0.0010932	0.00618239	9.50219e-06	7.23286e-11	0.00728577
1651	9.55581e-13	2.92012e-07	0.00075852	0.00798629	1.84916e-05	2.06324e-10	0.0087636
1652	2.75578e-13	1.20744e-07	0.000509223	0.00998174	3.48175e-05	5.69457e-10	0.0105259
1653	7.68941e-14	4.83063e-08	0.000330767	0.0120709	6.34297e-05	1.5207e-09	0.0124651
1654	2.07594e-14	1.86988e-08	0.000207877	0.0141236	0.000111805	3.92917e-09	0.0144433
1655	5.4226e-15	7.00319e-09	0.000126405	0.0159891	0.000190678	9.82265e-09	0.0163062
1656	1.37048e-15	2.53776e-09	7.43696e-05	0.0175135	0.000314638	2.3759e-08	0.0179026
1657	3.35128e-16	8.89769e-10	4.23349e-05	0.0185608	0.000502338	5.56034e-08	0.0191055
1658	7.92906e-17	3.0184e-10	2.3317e-05	0.0190323	0.000775984	1.25906e-07	0.0198317
1659	1.81511e-17	9.90712e-11	1.24257e-05	0.0188824	0.0011598	2.75844e-07	0.0200549
1660	4.0203e-18	3.14624e-11	6.40677e-06	0.0181258	0.00167719	5.84728e-07	0.01981
1661	8.61561e-19	9.66734e-12	3.19618e-06	0.0168348	0.00234669	1.19927e-06	0.0191859
1662	1.78643e-19	2.87406e-12	1.54275e-06	0.0151284	0.00317689	2.37985e-06	0.0183092
1663	3.58391e-20	8.26715e-13	7.20495e-07	0.0131537	0.00416121	4.56937e-06	0.0173202
1664	6.95666e-21	2.30085e-13	3.25566e-07	0.0110657	0.00527363	8.48857e-06	0.0163481
1665	1.30652e-21	6.19574e-14	1.42338e-07	0.00900696	0.00646655	1.52576e-05	0.0154889
1666	2.37413e-22	1.61425e-14	6.02106e-08	0.00709335	0.00767198	2.65344e-05	0.0147919
1667	4.17413e-23	4.06931e-15	2.46433e-08	0.00540501	0.00880673	4.46482e-05	0.0142564
1668	7.10067e-24	9.92527e-16	9.75879e-09	0.00398487	0.00978124	7.26896e-05	0.0138388
1669	1.1687e-24	2.34227e-16	3.73909e-09	0.00284252	0.010511	0.000114502	0.0134681
1670	1.86115e-25	5.34814e-17	1.38614e-09	0.00196185	0.0109287	0.000174512	0.0130651
1671	2.86769e-26	1.18152e-17	4.9719e-10	0.00131009	0.0109942	0.000257341	0.0125617
1672	4.27517e-27	2.52553e-18	1.72548e-10	0.000846461	0.0107012	0.000367169	0.0119149
1673	6.16664e-28	5.22319e-19	5.79386e-11	0.000529159	0.010078	0.000506868	0.011114
1674	8.60627e-29	1.04518e-19	1.88234e-11	0.000320064	0.00918307	0.000677012	0.0101801
1675	1.16213e-29	2.02357e-20	5.91701e-12	0.00018731	0.00809605	0.000874924	0.00915828
1676	1.51833e-30	3.7907e-21	1.79961e-12	0.000106061	0.00690606	0.001094	0.00810612
1677	1.91933e-31	6.87055e-22	5.29574e-13	5.81065e-05	0.00569981	0.00132353	0.00708145
1678	2.34749e-32	1.20486e-22	1.50781e-13	3.0801e-05	0.00455158	0.00154926	0.00613165
1679	2.778e-33	2.04434e-23	4.15374e-14	1.57971e-05	0.00351671	0.00175464	0.00528715
1680	3.18077e-34	3.35615e-24	1.10714e-14	7.83903e-06	0.00262896	0.00192275	0.00455955
1681	3.52375e-35	5.33093e-25	2.85523e-15	3.76374e-06	0.00190153	0.00203859	0.00394388
1682	3.77703e-36	8.19289e-26	7.12444e-16	1.74843e-06	0.00133074	0.00209127	0.00342376
1683	3.91712e-37	1.21827e-26	1.72002e-16	7.8587e-07	0.000901067	0.00207569	0.00297754
1684	3.93058e-38	1.75275e-27	4.01778e-17	3.41763e-07	0.000590327	0.00199336	0.00258403
1685	3.81609e-39	2.4399e-28	9.08056e-18	1.43804e-07	0.000374198	0.00185218	0.00222652
1686	3.5847e-40	3.2862e-29	1.98569e-18	5.85449e-08	0.000229499	0.00166514	0.0018947
1687	3.25806e-41	4.28242e-30	4.20128e-19	2.30611e-08	0.000136186	0.00144841	0.00158462
1688	2.86508e-42	5.39954e-31	8.60052e-20	8.78907e-09	7.81914e-05	0.001219	0.0012972
1689	2.43774e-43	6.58714e-32	1.70349e-20	3.241e-09	4.34366e-05	0.000992638	0.00103608
1690	2.00683e-44	7.77514e-33	3.26458e-21	1.15634e-09	2.33467e-05	0.000782076	0.000805424
1691	1.59848e-45	8.87958e-34	6.05324e-22	3.99177e-10	1.21414e-05	0.000596182	0.000608324
1692	1.2319e-46	9.81181e-35	1.08598e-22	1.33327e-10	6.10915e-06	0.000439725	0.000445834
1693	9.18573e-48	1.04901e-35	1.88506e-23	4.30866e-11	2.97418e-06	0.000313802	0.000316776
1694	6.62714e-49	1.08512e-36	3.16593e-24	1.34722e-11	1.40096e-06	0.000216672	0.000218073
1695	4.62605e-50	1.08606e-37	5.14458e-25	4.07576e-12	6.38494e-07	0.000144751	0.00014539
1696	3.1244e-51	1.05171e-38	8.08856e-26	1.19303e-12	2.81553e-07	9.3565e-05	9.38466e-05
1697	2.04172e-52	9.85407e-40	1.23045e-26	3.3788e-13	1.20125e-07	5.85164e-05	5.86365e-05
1698	1.29091e-53	8.93317e-41	1.81105e-27	9.25868e-14	4.95887e-08	3.5409e-05	3.54586e-05
1699	7.89716e-55	7.83552e-42	2.5791e-28	2.45475e-14	1.98063e-08	2.07311e-05	2.07509e-05
1700	4.6743e-56	6.64971e-43	3.55369e-29	6.29705e-15	7.65411e-09	1.17436e-05	1.17513e-05
1701	2.67692e-57	5.46021e-44	4.73764e-30	1.56293e-15	2.86193e-09	6.43658e-06	6.43944e-06
1702	1.48329e-58	4.33799e-45	6.11106e-31	3.75331e-16	1.03537e-09	3.41335e-06	3.41438e-06
1703	7.95221e-60	3.33457e-46	7.62683e-32	8.72092e-17	3.62414e-10	1.75137e-06	1.75173e-06
1704	4.12499e-61	2.48007e-47	9.20965e-33	1.96057e-17	1.2274e-10	8.69455e-07	8.69578e-07
1705	2.07028e-62	1.78468e-48	1.07601e-33	4.26455e-18	4.02198e-11	4.17628e-07	4.17668e-07
1706	1.00533e-63	1.24259e-49	1.21635e-34	8.97506e-19	1.27516e-11	1.9409e-07	1.94103e-07
1707	4.72347e-65	8.37084e-51	1.33038e-35	1.82757e-19	3.91168e-12	8.7275e-08	8.7279e-08
1708	2.14726e-66	5.45609e-52	1.40787e-36	3.60066e-20	1.161e-12	3.79707e-08	3.79719e-08
1709	9.44455e-68	3.44086e-53	1.44153e-37	6.86378e-21	3.33408e-13	1.59838e-08	1.59841e-08
1710	4.0193e-69	2.09954e-54	1.4281e-38	1.26595e-21	9.26385e-14	6.51003e-09	6.51013e-09
1711	1.65497e-70	1.23952e-55	1.36887e-39	2.25913e-22	2.49046e-14	2.56542e-09	2.56545e-09
1712	6.59332e-72	7.08037e-57	1.26952e-40	3.90067e-23	6.47796e-15	9.78153e-10	9.78159e-10
1713	2.5415e-73	3.91318e-58	1.13918e-41	6.51642e-24	1.63031e-15	3.6085e-10	3.60852e-10
1714	9.47866e-75	2.09255e-59	9.89038e-43	1.0533e-24	3.96985e-16	1.28801e-10	1.28801e-10
1715	3.4204e-76	1.08267e-60	8.30821e-44	1.64727e-25	9.35299e-17	4.4482e-11	4.44821e-11
1716	1.19421e-77	5.41984e-62	6.75265e-45	2.4926e-26	2.13206e-17	1.48635e-11	1.48635e-11
1717	4.03417e-79	2.62512e-63	5.31023e-46	3.64932e-27	4.7024e-18	4.80541e-12	4.80541e-12
1718	1.31856e-80	1.23023e-64	4.0404e-47	5.16944e-28	1.00349e-18	1.50318e-12	1.50318e-12
1719	4.16984e-82	5.57819e-66	2.97446e-48	7.08511e-29	2.07195e-19	4.54952e-13	4.54952e-13
1720	1.27588e-83	2.44722e-67	2.11867e-49	9.39556e-30	4.1392e-20	1.33227e-13	1.33227e-13
1721	3.77724e-85	1.03879e-68	1.46013e-50	1.20551e-30	8.00066e-21	3.77477e-14	3.77477e-14
1722	1.08196e-86	4.26629e-70	9.73627e-52	1.49655e-31	1.49626e-21	1.03481e-14	1.03481e-14
1723	2.9986e-88	1.6953e-71	6.28153e-53	1.79756e-32	2.70746e-22	2.74476e-15	2.74476e-15
1724	8.04079e-90	6.51804e-73	3.92112e-54	2.08905e-33	4.74012e-23	7.04399e-16	7.04399e-16
1725	2.08618e-91	2.4247e-74	2.36825e-55	2.34902e-34	8.0295e-24	1.74907e-16	1.74907e-16
1726	5.23693e-93	8.72715e-76	1.38394e-56	2.55562e-35	1.31601e-24	4.2021e-17	4.2021e-17
1727	1.27196e-94	3.03919e-77	7.8249e-58	2.69016e-36	2.08691e-25	9.76783e-18	9.76783e-18
1728	2.98912e-96	1.02404e-78	4.28068e-59	2.73988e-37	3.20198e-26	2.19686e-18	2.19686e-18
1729	6.7965e-98	3.33847e-80	2.26579e-60	2.69996e-38	4.75343e-27	4.78056e-19	4.78056e-19
1730	1.4952e-99	1.05305e-81	1.16037e-61	2.57428e-39	6.8276e-28	1.00653e-19	1.00653e-19
1731	3.18263e-101	3.21385e-83	5.74975e-63	2.3748e-40	9.48857e-29	2.05045e-20	2.05045e-20
1732	6.55457e-103	9.49015e-85	2.75659e-64	2.11968e-41	1.27587e-29	4.0415e-21	4.0415e-21
1733	1.3061e-104	2.7114e-86	1.2787e-65	1.83057e-42	1.6599e-30	7.7074e-22	7.7074e-22
1734	2.51813e-106	7.49523e-88	5.73899e-67	1.52959e-43	2.08945e-31	1.42215e-22	1.42215e-22
1735	4.69736e-108	2.0047e-89	2.49216e-68	1.23661e-44	2.5448e-32	2.53896e-23	2.53896e-23
1736	8.47816e-110	5.18783e-91	1.0471e-69	9.67311e-46	2.9988e-33	4.3857e-24	4.3857e-24
1737	1.48054e-111	1.29896e-92	4.25669e-71	7.321e-47	3.41912e-34	7.32982e-25	7.32982e-25
1738	2.50158e-113	3.14685e-94	1.67428e-72	5.36102e-48	3.77184e-35	1.18528e-25	1.18528e-25
1739	4.08958e-115	7.37614e-96	6.37174e-74	3.79836e-49	4.02591e-36	1.85447e-26	1.85447e-26
1740	6.46867e-117	1.67284e-97	2.34617e-75	2.60386e-50	4.15764e-37	2.80732e-27	2.80732e-27
1741	9.89975e-119	3.67073e-99	8.35859e-77	1.72708e-51	4.15435e-38	4.11183e-28	4.11183e-28
1742	1.4659e-120	7.79333e-101	2.88124e-78	1.10835e-52	4.01634e-39	5.82709e-29	5.82709e-29
1743	2.10019e-122	1.6009e-102	9.60942e-80	6.88202e-54	3.75691e-40	7.98988e-30	7.98988e-30
1744	2.91129e-124	3.18185e-104	3.1009e-81	4.13453e-55	3.40019e-41	1.05999e-30	1.05999e-30
1745	3.90466e-126	6.11881e-106	9.68168e-83	2.40331e-56	2.97747e-42	1.36061e-31	1.36061e-31
1746	5.06704e-128	1.13848e-107	2.92473e-84	1.35165e-57	2.52269e-43	1.68981e-32	1.68981e-32
1747	6.36204e-130	2.04955e-109	8.54856e-86	7.35515e-59	2.06801e-44	2.03056e-33	2.03056e-33
1748	7.72879e-132	3.56995e-111	2.41753e-87	3.8725e-60	1.64027e-45	2.36084e-34	2.36084e-34
1749	9.08446e-134	6.01642e-113	6.61492e-89	1.97271e-61	1.25878e-46	2.65576e-35	2.65576e-35
1750	1.03314e-135	9.8104e-115	1.75125e-90	9.72315e-63	9.34661e-48	2.89056e-36	2.89056e-36

## Sheet: EDF2K
FRAP in vitro WT and L26P
WT					L26P						t1/2 mean	t1/2 std	MF mean	MF std
										WT	34.5575	18.9663	0.725	0.097468
time (s)	fluorescence mean	fluorescence std			time (s)	fluorescence mean	fluorescence std			L26P	7.0675	3.47607	0.89	0.036645
-9.551	0.995783	0.003468			-9.304	1.00162	0.002834
-9.047	0.996441	0.002012			-8.802	1.0005	0.005528
-8.55	0.999212	0.004203			-8.304	1.00215	0.004342
-8.052	1.00065	0.00465			-7.802	0.996005	0.003517
-7.553	0.996524	0.002222			-7.305	0.997448	0.007695
-7.054	1.00066	0.004653			-6.804	0.998481	0.005775
-6.553	1.00269	0.002119			-6.307	0.993969	0.007584
-6.054	1.00286	0.005407			-5.807	1.00415	0.005572
-5.555	1.00119	0.005875			-5.308	1.00413	0.007669
-5.057	1.00205	0.004629			-4.808	1.00179	0.00482
-4.555	0.998678	0.003034			-4.308	1.00064	0.004049
-4.057	0.999685	0.003522			-3.81	0.999765	0.004621
-3.555	1.00475	0.004669			-3.309	0.998827	0.004653
-3.059	1.00176	0.002699			-2.812	1.00009	0.005769
-2.558	0.997064	0.005657			-2.313	1.00054	0.003969
0	0.426668	0.024028			0	0.495351	0.03818
0.129	0.434589	0.024965			0.154	0.497499	0.044409
0.622	0.432839	0.026709			0.653	0.514712	0.038938
1.125	0.44045	0.025707			1.15	0.535629	0.045885
1.623	0.463573	0.019675			1.649	0.550958	0.047243
2.12	0.458124	0.032367			2.146	0.562465	0.039748
2.621	0.464777	0.025903			2.646	0.57782	0.046219
3.12	0.463608	0.02892			3.147	0.587142	0.044288
3.621	0.472728	0.033641			3.644	0.598219	0.049698
4.12	0.478921	0.03539			4.145	0.609798	0.055952
4.621	0.481345	0.031938			4.643	0.620621	0.053806
5.113	0.491502	0.031979			5.142	0.63156	0.049286
5.616	0.491601	0.03835			5.644	0.641905	0.054987
6.112	0.498614	0.035978			6.138	0.653338	0.052161
6.614	0.499221	0.037085			6.64	0.661624	0.053576
7.111	0.50589	0.034913			7.138	0.667481	0.050908
7.611	0.514778	0.037807			7.639	0.681635	0.051028
8.109	0.509814	0.038117			8.137	0.683871	0.054767
8.609	0.519825	0.042724			8.635	0.6977	0.05863
9.107	0.517418	0.042617			9.136	0.701108	0.058596
9.608	0.529919	0.044558			9.635	0.708285	0.057334
10.106	0.534495	0.048299			10.134	0.715551	0.055178
10.603	0.534401	0.043664			10.633	0.723081	0.052673
11.105	0.538771	0.040028			11.133	0.728155	0.050972
11.606	0.540042	0.047185			11.635	0.736504	0.050082
12.104	0.551659	0.047865			12.131	0.740547	0.051316
12.603	0.548996	0.043873			12.63	0.743691	0.053613
13.101	0.548483	0.045436			13.131	0.751246	0.052065
13.6	0.552185	0.0439			13.628	0.757528	0.052397
14.102	0.555488	0.046945			14.128	0.76176	0.05275
14.598	0.559937	0.048268			14.625	0.767779	0.047683
15.097	0.564732	0.045616			15.128	0.772405	0.049884
15.598	0.565844	0.047436			15.626	0.775036	0.051024
16.096	0.577394	0.049427			16.125	0.78068	0.049595
16.598	0.570879	0.044756			16.624	0.787599	0.051012
17.095	0.57988	0.044696			17.121	0.785309	0.046886
17.597	0.585328	0.045853			17.622	0.793568	0.0522
18.1	0.590483	0.050463			18.12	0.800873	0.053268
18.596	0.594285	0.041755			18.62	0.800442	0.046866
19.094	0.592266	0.044055			19.12	0.80531	0.046181
19.591	0.594248	0.044358			19.617	0.811319	0.049567
20.09	0.595731	0.04197			20.119	0.815005	0.046897
20.592	0.599609	0.04616			20.618	0.82074	0.046135
21.09	0.599575	0.04626			21.116	0.824086	0.046285
21.589	0.598473	0.043851			21.615	0.820314	0.039544
22.089	0.600066	0.042718			22.116	0.827779	0.046123
22.589	0.606181	0.051021			22.614	0.830302	0.048391
23.087	0.612438	0.047955			23.114	0.835824	0.044979
23.585	0.609855	0.044439			23.615	0.832254	0.040961
24.086	0.613132	0.05019			24.111	0.83563	0.041492
24.583	0.618637	0.048375			24.612	0.84561	0.040091
25.084	0.618733	0.042583			25.109	0.849084	0.046633
25.581	0.618619	0.047112			25.609	0.848915	0.046641
26.085	0.625322	0.04863			26.109	0.849979	0.03717
26.582	0.629	0.053853			26.608	0.85473	0.042955
27.085	0.629652	0.045783			27.107	0.854635	0.039494
27.58	0.629628	0.046075			27.609	0.860813	0.041013
28.08	0.634087	0.056544			28.105	0.860584	0.041364
28.576	0.633465	0.051242			28.607	0.865453	0.038847
29.078	0.632339	0.051487			29.101	0.867225	0.038265
29.574	0.639677	0.050356			29.602	0.870012	0.038224
30.074	0.640257	0.050831			30.102	0.871696	0.033122
30.573	0.642471	0.052744			30.603	0.874185	0.032574
31.073	0.646439	0.052089			31.099	0.873441	0.036957
31.577	0.644355	0.043446			31.598	0.876087	0.033354
32.074	0.646078	0.049249			32.099	0.879574	0.035392
32.568	0.644941	0.050716			32.596	0.878548	0.0322
33.073	0.64986	0.046115			33.098	0.884026	0.037715
33.566	0.652866	0.044904			33.595	0.880547	0.033723
34.066	0.654335	0.047096			34.094	0.885221	0.030941
34.566	0.655355	0.046226			34.595	0.89082	0.030468
35.069	0.654032	0.042326			35.094	0.891861	0.038618
35.564	0.663196	0.044855			35.597	0.895974	0.037698
36.066	0.663955	0.044068			36.091	0.892691	0.030632
36.566	0.663714	0.04494			36.592	0.896635	0.035739
37.064	0.664477	0.046296			37.088	0.896067	0.033568
37.562	0.665534	0.046335			37.588	0.897745	0.031512
38.058	0.667268	0.050379			38.089	0.895901	0.031539
38.565	0.670659	0.043678			38.589	0.900877	0.036364
39.058	0.669719	0.042309			39.086	0.903187	0.035676
39.56	0.669672	0.040206			39.585	0.902438	0.027282
40.06	0.671265	0.045645			40.084	0.901811	0.032543
40.559	0.673855	0.043546			40.585	0.902637	0.029801
41.058	0.676946	0.050184			41.085	0.904503	0.029701
41.557	0.675948	0.045231			41.584	0.906833	0.026559
42.06	0.681391	0.047337			42.083	0.909779	0.031401
42.554	0.679034	0.041732			42.584	0.911312	0.031073
43.052	0.67891	0.043654			43.078	0.912454	0.028481
43.551	0.680137	0.044362			43.582	0.910086	0.028539
44.051	0.690749	0.041364			44.08	0.91481	0.031587
44.552	0.684848	0.049268			44.579	0.91382	0.027513
45.052	0.690126	0.040566			45.079	0.915647	0.030237
45.55	0.685351	0.045437			45.577	0.916617	0.029066
46.049	0.68743	0.048967			46.077	0.917836	0.026867
46.547	0.689674	0.04492			46.575	0.922672	0.034574
47.048	0.689611	0.044384			47.073	0.919014	0.034001
47.544	0.694287	0.05047			47.575	0.918301	0.026852
48.045	0.693541	0.046588			48.075	0.921396	0.02584
48.545	0.698015	0.047411			48.572	0.922631	0.03377
49.044	0.695078	0.044265			49.074	0.925388	0.031047
49.543	0.69486	0.043298			49.571	0.92648	0.025937
50.045	0.691926	0.042358			50.068	0.926369	0.02454
50.54	0.699911	0.045218			50.569	0.927045	0.023041
51.042	0.700287	0.042498			51.069	0.925844	0.021648
51.539	0.705319	0.044086			51.567	0.927293	0.020818
52.04	0.707575	0.045513			52.068	0.928974	0.025105
52.542	0.70329	0.043986			52.564	0.926892	0.022765
53.039	0.703416	0.041889			53.066	0.930951	0.024716
53.537	0.704859	0.039717			53.565	0.92938	0.018298
54.035	0.710762	0.044333			54.064	0.927911	0.023574
54.534	0.710518	0.044582			54.563	0.932898	0.021521
55.034	0.706166	0.038721			55.059	0.932959	0.027338
55.536	0.70924	0.045351			55.558	0.937949	0.026608
56.036	0.709786	0.04436			56.059	0.934666	0.022846
56.532	0.708662	0.04694			56.555	0.934194	0.021429
57.028	0.711082	0.044444			57.061	0.937114	0.024956
57.532	0.712565	0.046787			57.554	0.93779	0.02586
58.03	0.710759	0.04193			58.058	0.938132	0.025244
58.527	0.715068	0.040663			58.556	0.938745	0.019734
59.027	0.711857	0.041239			59.056	0.938937	0.017509
59.526	0.720348	0.041311			59.553	0.933597	0.020836
60.028	0.713996	0.046606			60.053	0.943138	0.02378
60.525	0.719385	0.048304			60.553	0.941682	0.019993
61.027	0.721204	0.053023			61.048	0.939976	0.017426
61.523	0.716688	0.045109			61.552	0.941847	0.021541
62.023	0.722907	0.045185			62.049	0.944886	0.02256
62.524	0.723883	0.047138			62.548	0.944685	0.01836
63.021	0.715038	0.041563			63.047	0.943611	0.021472
63.52	0.71932	0.036482			63.546	0.94364	0.019186
64.02	0.722126	0.042273			64.047	0.945246	0.01758
64.519	0.725769	0.045803			64.545	0.946576	0.01715
65.014	0.723864	0.040778			65.044	0.945367	0.017234
65.517	0.72604	0.044972			65.544	0.950934	0.024836
66.018	0.729481	0.04198			66.043	0.947582	0.01197
66.517	0.728031	0.045302			66.544	0.94845	0.021484
67.015	0.723997	0.045281			67.042	0.946666	0.018344
67.516	0.728884	0.036991			67.541	0.946103	0.018354
68.014	0.732633	0.044288			68.039	0.945574	0.015169
68.511	0.734396	0.041806			68.539	0.945348	0.018559
69.014	0.732976	0.038564			69.039	0.94639	0.022983
69.514	0.73767	0.051407			69.539	0.950721	0.021125
70.01	0.729663	0.03716			70.036	0.946858	0.019282
70.508	0.736244	0.043114			70.536	0.948612	0.020461
71.012	0.72803	0.042974			71.035	0.947744	0.0181
71.508	0.7363	0.046663			71.533	0.950075	0.018175
72.004	0.736462	0.044988			72.036	0.950722	0.020174
72.504	0.73671	0.041805			72.535	0.952802	0.015967
73.005	0.736277	0.043527			73.029	0.955573	0.017388
73.503	0.735713	0.042014			73.532	0.952797	0.015812
74.003	0.741011	0.038979			74.031	0.951387	0.014903
74.502	0.743774	0.045812			74.531	0.951422	0.016413
75.002	0.744252	0.038859			75.028	0.948275	0.013416
75.5	0.740287	0.0414			75.528	0.950424	0.013911
76.005	0.739301	0.040215			76.028	0.949777	0.013034
76.503	0.742281	0.044754			76.528	0.95256	0.01405
76.999	0.745023	0.043564			77.027	0.952012	0.016325
77.5	0.743861	0.040175			77.524	0.951005	0.015154
77.999	0.744783	0.038405			78.026	0.951446	0.014835
78.497	0.745414	0.042276			78.522	0.950252	0.016027
78.995	0.746271	0.042249			79.024	0.948615	0.013475
79.495	0.748287	0.040761			79.522	0.951846	0.013222
79.993	0.746062	0.038725			80.022	0.953327	0.01286
80.497	0.751438	0.031696			80.523	0.953264	0.010567
80.994	0.750348	0.030264			81.017	0.952702	0.015494
81.493	0.750353	0.045215			81.52	0.954395	0.013674
81.99	0.746991	0.037152			82.02	0.952097	0.011866
82.49	0.749943	0.042236			82.518	0.951625	0.017334
82.989	0.750238	0.036752			83.016	0.954008	0.012192
83.485	0.749358	0.041202			83.516	0.953606	0.010048
83.989	0.750207	0.036342			84.015	0.953326	0.011934
84.488	0.756417	0.038624			84.513	0.957076	0.008026
84.986	0.747823	0.04072			85.012	0.953728	0.011746
85.488	0.751092	0.038283			85.514	0.953907	0.010244
85.985	0.752814	0.044564			86.009	0.956014	0.012174
86.482	0.757894	0.039311			86.511	0.9583	0.014004
86.981	0.749541	0.042281			87.012	0.95674	0.012626
87.482	0.755025	0.045712			87.51	0.953807	0.013084
87.98	0.760389	0.041647			88.009	0.956475	0.015863
88.48	0.761502	0.042204			88.51	0.955336	0.015839
88.979	0.755136	0.036627			89.005	0.953984	0.011534
89.483	0.758826	0.041615			89.505	0.952541	0.012469
89.979	0.755559	0.040748			90.005	0.959608	0.009692
90.48	0.762518	0.030937			90.507	0.953944	0.012189
90.979	0.759193	0.033635			91.004	0.957455	0.009836
91.472	0.761612	0.043927			91.504	0.955169	0.00994
91.976	0.760677	0.043599			92.004	0.955931	0.013021
92.475	0.760821	0.041			92.502	0.954547	0.010311
92.975	0.759665	0.038013			92.998	0.956842	0.013568
93.469	0.759284	0.039715			93.502	0.955677	0.010963
93.969	0.759359	0.042873			93.998	0.953938	0.01416
94.472	0.760216	0.040862			94.494	0.956235	0.014272
94.972	0.759225	0.038219			94.999	0.953698	0.010992
95.469	0.76497	0.040237			95.496	0.954257	0.012194
95.966	0.761295	0.041217			95.994	0.953531	0.01111
96.465	0.761924	0.037544			96.493	0.955127	0.013507
96.968	0.762955	0.043627			96.997	0.952327	0.009278
97.463	0.7636	0.04127			97.493	0.955555	0.010514
97.965	0.76538	0.038076			97.994	0.954576	0.012428
98.462	0.768777	0.03857			98.489	0.951847	0.009459
98.961	0.766237	0.04572			98.989	0.953245	0.01184
99.465	0.768945	0.036628			99.491	0.95423	0.009329
99.961	0.771852	0.045818			99.989	0.954103	0.011386
100.461	0.768312	0.040101			100.488	0.952943	0.009915
100.96	0.76626	0.042562			100.986	0.955974	0.010456
101.462	0.76647	0.040022			101.485	0.956116	0.009756
101.959	0.763646	0.044054			101.985	0.954819	0.00937
102.457	0.763892	0.034371			102.483	0.951974	0.010056
102.956	0.766348	0.036854			102.985	0.954827	0.005425
103.454	0.767943	0.033967			103.485	0.953752	0.007589
103.954	0.769417	0.032802			103.981	0.954061	0.00564
104.457	0.767443	0.036904			104.48	0.953842	0.007784
104.955	0.76668	0.039			104.982	0.953957	0.009596
105.454	0.771753	0.036154			105.478	0.952428	0.008006
105.952	0.771768	0.035304			105.983	0.954808	0.010122
106.46	0.768843	0.033578			106.479	0.952483	0.008553
106.955	0.771283	0.031805			106.978	0.956905	0.009602
107.456	0.767637	0.035648			107.478	0.955654	0.010984
107.951	0.772262	0.03696			107.978	0.953819	0.007943
108.452	0.771794	0.040026			108.475	0.952637	0.006001
108.951	0.776638	0.03412			108.975	0.954602	0.01009
109.452	0.776591	0.033289			109.474	0.951895	0.010687
109.951	0.77557	0.035249			109.973	0.954578	0.012159
110.45	0.776642	0.037053			110.472	0.956327	0.009718
110.948	0.776912	0.038204			110.972	0.95467	0.009677
111.449	0.775778	0.036077			111.473	0.955351	0.009413
111.945	0.781623	0.034591			111.971	0.95167	0.009973
112.447	0.779017	0.03649			112.469	0.95399	0.0068
112.945	0.779941	0.034394			112.969	0.953835	0.010561
113.445	0.774488	0.040576			113.466	0.95421	0.00684
113.942	0.781786	0.035944			113.969	0.952228	0.007798
114.444	0.783442	0.034852			114.468	0.950383	0.009032
114.939	0.786123	0.039353			114.966	0.953255	0.008468
115.442	0.787144	0.036615			115.465	0.953555	0.007582
115.939	0.786038	0.039553			115.964	0.953226	0.006132
116.444	0.784194	0.037479			116.461	0.952612	0.00842
116.938	0.786626	0.036808			116.962	0.952864	0.009028
117.436	0.777956	0.044172			117.463	0.952035	0.007007
117.936	0.789912	0.039411			117.959	0.95172	0.009446
118.44	0.781127	0.039757			118.459	0.953899	0.006589
118.938	0.785567	0.03639			118.957	0.953545	0.006931
119.432	0.786599	0.035587			119.459	0.951408	0.006919
119.935	0.783959	0.040257			119.956	0.952539	0.007075
120.432	0.784976	0.037507			120.454	0.949508	0.009028
120.931	0.788869	0.037757			120.958	0.953829	0.012706
121.435	0.785203	0.039221			121.453	0.952418	0.008798
121.932	0.783626	0.036783			121.954	0.952368	0.007758
122.43	0.783398	0.03833			122.452	0.951815	0.00885
122.929	0.781223	0.036772			122.95	0.956026	0.011751
123.43	0.782859	0.034676			123.451	0.950972	0.011602
123.93	0.782033	0.029398			123.948	0.951661	0.009372
124.427	0.787497	0.035211			124.448	0.952122	0.011132
124.926	0.791384	0.033102			124.948	0.952949	0.009098
125.425	0.787344	0.037627			125.447	0.952006	0.010952
125.922	0.78934	0.04095			125.947	0.951564	0.011832
126.424	0.786391	0.029882			126.444	0.951363	0.010451
126.926	0.793292	0.02946			126.944	0.953382	0.010278
127.422	0.793874	0.026932			127.446	0.950592	0.011331
127.923	0.787858	0.032384			127.944	0.949323	0.010961
128.419	0.789941	0.035816			128.444	0.952909	0.011723
128.92	0.78822	0.035268			128.944	0.949753	0.010897
129.416	0.793352	0.033572			129.444	0.950485	0.007824
129.92	0.789005	0.029526			129.942	0.948977	0.010083
130.417	0.789983	0.043016			130.441	0.948725	0.010366
130.915	0.792394	0.03305			130.94	0.950704	0.009682
131.417	0.789752	0.03108			131.437	0.94822	0.010127
131.915	0.793231	0.043803			131.937	0.950665	0.010574
132.415	0.792962	0.032394			132.436	0.948954	0.010119
132.91	0.79449	0.034199			132.934	0.951677	0.008823
133.414	0.795832	0.036982			133.435	0.947306	0.010155
133.911	0.791196	0.035614			133.937	0.949026	0.009776
134.409	0.793956	0.03823			134.432	0.946048	0.0098
134.911	0.792943	0.030625			134.934	0.945179	0.01069
135.409	0.800428	0.031123			135.43	0.947084	0.013193
135.91	0.800549	0.03808			135.931	0.948969	0.011834
136.408	0.795449	0.039117			136.432	0.945719	0.008788
