# Supplementary material for: Rational optimization of a transcription factor activation domain inhibitor
Source: Nat Struct Mol Biol. 2023 Dec 4;30(12):1958–69. doi: 10.1038/s41594-023-01159-5 (PMC10716049; doi:10.1038/s41594-023-01159-5)
Supplement: Supplementary file 21 — Statistical source data. [file 41594_2023_1159_MOESM21_ESM.xlsx]

## Sheet: EDF3D
NuclGranularity Mean Int
Mean Intensity
n1		V7	22Y	14Y	8Y		n2	V7	22Y	14Y	8Y		n3	V7	22Y	14Y	8Y
		1094.63	685.08	1517.85	1106			880.1	218.97	2002.95	2606.95			1435.34	2241.45	2336.93	1738.42
		520.56	1110.14	553.59	646.07			154.68	412.25	1675.43	2361.61			795.37	2845.91	3113.16	2327.98
		741.47	561.86	897.31	1519.63			1150.05	1769.47	1387.47	2727.42			1363.06	1740.78	2647.27	2033.12
		789.18	565.46	2022.59	2382.37			1459.08	747.9	463.33	2790.72			1849.29	897.97	2553.38	1826.21
		1230.83	412.81	273.18	621.23			755.99	778.15	668.12	1845.13			2213.7	2097.8	1527.51	1212.59
		1773.17	740.94	877.19	1406.66			1981.58	345.43	499.26	242.74			926.75	1749.61	1017	1914.21
		867.06	1841.65	239.04	1679.76			2242.98	1934.28	350.04	912.02			2010.68	2779.83	1868.96	3293.96
		1124.39	1990.03	233.64	1097.65			1065.57	1333.71	430.62	824.15			1923.67	2501.26	1571.07	3203.25
		1332.02	304.89	1836.47	2296.88			2324.11	1208.19	624.83	798.28			3462.36	2576.38	2718.29	815.86
		2267.57	1097.7	2790.56	1294.46			1595.88	1437.53	901.22	2580.74			947.9	1773.33	1996.65	1351.13
		2197.36	816.84	2073.34	435.31			1596.16	1477.33	569.6	1040.84			569.16	963.09	1763.3	3072.16
		2731.51	2796.37	1671.19	1106.48			2153.14	1969.5	1658.99	1773.07			980.07	1050.06	2022.99	3016.64
		2895.86	1116.37	1395.06	746.46			2173.04	1948.65	1776.87	2118.32			1962.8	1185.33	1852.25	2934.89
		2630.56	541.34	1151.34	1904.87			1288.1	1674.6	495.69	732.09			1096.13	859.14	2301.16	1341.64
		2787.16	175.06	790.63	1803.34			1645.53	2020.49	3217.88	376.27			1980.59	1225.23	2120.76	1311.42
		1748.72	168.62	892.53	3468.79			1588.04	1969.99	588.36	278.45			3204.49	1031.56	1592.17	1775.16
		909.12	182.88	3158.21	1216.66			1949.91	471.47	347.43	993.76			2649.18	1493.49	2188.04	1674.91
		531.42	148.78	2402.46	356.56			1902.31	473.4	404.86	535.57			1519.12	1721.56	2328.65	2921.14
		2526.58	144.85	1578.05	675.35			1198.94	497.36	217				2764.53	1180.89	1748.66	845.03
		1156.12	465.48	1173.74	1482.85			1841.24	1234.79	618.22				1897.28	1491.58	1930.62	2040.27
		1821.65	361.31	1142.59	2111.46			944.64	618.93	2336.65				1769.59	952.7	1250.44	1637.77
		199.18	516.69	2000.02	2278.13			1769.25	704.5	430.25				1716	2110.16	1483.23	1247.77
		294.38	1388.21	432.13	1617.7			1835.63	1059.39	781.16				2132.03	2179.61	2291.81	1931.59
		1494.79	1498.71	460.93	1724.16			1687.79	736.15	2829.71				2869.68	887.54	2190.88	2142.25
		1573.51	621.98	1032.73	1364.15			2023.94	2180.21	2879.73				1742.07	985.47	1487.13	2734.06
		2875.82	362.76	809.39	607.71			1122.39	1793.92	1192.69				1390.23	1943.23	1273.07	1707.51
		818.31	1766.79	1510.49	1390.34			1729.66	1642.56	1789.91				3046.35	2531.47	1523.99	1951.14
		949.55	1463.8	1048.8	1774.29			1112.72	2069.78	1350.06				1590.05	1659.55	1445.84	1867.55
		1037.66	577.93	1138.76	1474.36			1399.96	1009.87	987.82				3672.75	1480.99	1476.03	1235.1
		1024.13	630.5	1512.45	775.27			1874.11	1143.36	1933.74				3223.43	1336.5	3324.14	3120.02
		1021.67	843.24	932.66	749.26			1381.03	403.42	1219.29				1962.5	1801.06	2536.68	2262.09
		1121.82	761.03	784.02	2341.77			1557.74	882.56	1639.18				1926.91	1161.26	1889.68	1793.85
		1886.85	1066.25	288.09	1420.67			1589.6	1318.28	1682.15				1839.75	2227.23	1310.26	1231.42
		1567.2	1893.31	334.26	810.66			1262.32	787.96	962.46				1907.26	876.99	1218.52	1487.54
		1039.16	368.92	431.13	2186.16			2010.1	1444.69	701.74				3280.82	836.89	1557.01	1073.98
			1534.01	474.43	1082.64			2660.18	1173.4	1612.42				2190.85	2185.81	1654.07	2316.38
			241.83	1556.05	1169.46			1646.27	2460.71	1031.2				1352.3	1284.08	2982.66	1352.54
			673.5	1416.62	1021.32			1964.86	1613.04	2516.62				2443.21	1510.35	1924.57	1349.63
			341.66	1468.85	1035.51			1206.3	1295.37	1470.24				1028.44	2030.86	2349.07	2637.21
			1206.26	964.69	1081.91			2093.98	999.32	1722.54				2064.32	436.13	2652.66	1758.07
			2575.36	539.53	3140.79			956.58	1873.73	1385.46				817.9	2007.19	1727.35	967
			910.39	279.25	1485.79			1407.11	960.52	1856.82				1524.19	1315.8	2110	1989.14
			615.33	240.02	2296.62			1638.6	982.65	1686.42				2022.39	1900.97	2176.12	1670.19
			824.61	301.92	2856.07			1351.18	403.28	2481.4				3068.29	2357.45	1722.41	2587.62
			2020.42	162.4	852.72			1424	411.91	1338.94				2114.87	1727.61	1535.78	1394.34
			3140.1	2833.04	1442.69			2510.05	393.86	1260.93				2815.26	3222.39	1528.53	1996.08
			1433	445.87	2155.55			1092.74	1738.05	1666.47				3121.62	2683.79	797.85	3650.93
			1246.84	365.98	843.32			1667.98	2133.76					2110.85	1367.35	2810.26	1962.35
			2222.07		643.03			1286.37	687.97					2927.9	1107.75	2518.69	3330.74
			1115.46		665.44			1388.54	2304.29					2732.16	2532.82	2680.57	2018.76
			1012.19		1408.44			1960.88	3224.43					2871.36	2123.88	1345.78	1376.66
			592.54		661.68				2593.18					1459.9	1709.07	1184.59	2061.43
			777.12		1540.15				1768.03					2692.2	1488.09	1602.8	2095.06
			2270.75		370.18				2190.67					2423.26	1318.93	1577.17	1866.16
			448.31		2845.84				712.13					1374.55	1355.22	1202.5	1788.88
			304.29		2120.78				2055.71					1876.27	1994.23	2279.92	3458.91
			288.1		1112.22				2474.6					1827.57	1839.24	1094.98	1267.09
			476.4		1153.38				946.33					1079.24	1950.94	1589.71	3566.27
			461.77		713.44				661.73					1161.63	1545.54	1493.22	3358.45
			570.69		779.88				670.46					1858.46	2572.83	996.99	2804.44
			3171.52		1632.99				1075.23					2300.42	2232.14	2052.59	2644.46
			3204.02		840.7				1041.41					2108.31	2031.79	1390.27	1831.32
			3391.98		795.33				1617.07					2623.12	2000.62	1368.61	2337.23
			1706.79		1471.56				1552.42					3022.23
			2713.62		1736.61				1657.33					1901.72
			2987.36		590.12				1220.86					1876.34
			1648.9		582.58									2907.28
			2387.27		1317.69									2339.84
			1134.94		2255.56									1068.12
			1635.01		2134.46
					882.39

## Sheet: EDF3F
Source data for Supplementary Figure 3F
	T0	T60	BFDR<0.02 T60	FC>3 T60
AR-bait	11523000000		12413000000	12400000000
ACACA	6939603996		6023251896
HSPA8	1488868605		1942297933	1940000000
NPEPPS	1214005109		1686679079
RBM14	202825748		1338588839	1340000000
HSPA5	971406508		1225527220	1230000000
NCOR2	132193509		894413757	894000000
JUNB	214506907		792898926	793000000
HOXB13	3.62865e+07		779875162	780000000
ZYX	1155537417		775702177	776000000
UPF1	682471854		725340530
ARID1A	367863444		709726270	710000000
NFIX	8.0481e+07		625507428	626000000
JMJD1C	100853335		608546194	609000000
CTTN	687008516		526525408
HNRNPM	214462622		521096379
INTS13	418042219		519439373	519000000
PKP1	2.45991e+07		500518292	501000000
XAB2	343503726		456389576	456000000
BCL9L	6.83491e+07		433633615
PAK2	516469047		403869270
YAP1	145279274		392441025	392000000
UPF2	414799076	388539532
ARID1B	167072829		368086813	368000000
SYNRG	485845947		361043840	361000000
MELK	188239204	344686739
MRE11	431883192		341378522	341000000
FOSL1	3.84383e+07		327184965	327000000
NCOA3	2.13243e+07		304935994	305000000
ZNF281	8.79913e+07		302253946	302000000
HSPA9	109533842		277926783	278000000
PKM	230859262		269258058
HSPA1B	238587208		262251149	262000000
NCOA2	2.69525e+07		239291365	239000000
TCF20	1.65408e+07		226451528	226000000
PRR12	4.01257e+07		219473570	219000000
CAD	3.92461e+07		210580006
FOXA1	4.06729e+06		210238979	210000000
GSPT1	277396812		209138000
FOXA2	1.41421e+07		208269705	208000000
HELLS	130027198		197282627	197000000
VDAC2	191829660	194484398
PDLIM1	266354473	193510248
JUN	1.8447e+07		186549647	187000000
NCOR1	2.2917e+07		180542183	181000000
HSPA6	151276304		163889930	164000000
BCL9	2.12199e+07		163520483	164000000
TCF12	4.63427e+07		162543233	163000000
AGFG1	150116464		156359540
EDC3	134314434		150750882	151000000
TNRC6B	107010627		146487602	146000000
ARHGAP29	224435740		142398464
ZNF503	1.20402e+07		140168538	140000000
HNRNPF	49163619		136972829
PDLIM5	137244423		136213272
MED23	8.759e+07		131827049	132000000
BRCC3	8.26649e+07		129021573	129000000
SYNJ2	163329635		128720130
SMARCA4	4.334e+07		126635847	127000000
TNK1	159459011		125789689	126000000
AHDC1	2.11712e+07		122066669	122000000
TRIM33	1.39895e+07		118020003	118000000
SPATA2	105856676		117500592	118000000
ONECUT3	7.14205e+06		117165583	117000000
USP7	4.38711e+07		116916607	117000000
IGBP1	142271741		112669680
ZNF609	1.36395e+07		107852746	108000000
SMARCC2	4.55898e+07		106505224	107000000
TNRC6A	7.59487e+07		105970161	106000000
CCAR2	7.731e+07		104498882
EIF4B	130955520		103955226
AAK1	135223967		101262752
LPP	131656725		100738276	101000000
NUDT21	3.43254e+07		9.4266e+07
ARID5B	2.92302e+06		9.19136e+07	91913615
ZNF148	1.89081e+07		9.01834e+07	90183375
IARS2	103772995		8.91518e+07	89151850
CSNK2A1	2.55254e+07		8.52263e+07
IFI16	6.19554e+07		8.1358e+07	81357953
RAVER1	3.14684e+06		8.10919e+07	81091905
TWF2	104228774		7.9015e+07
WWTR1	2.68245e+07		7.89487e+07	78948691
HELZ	40165715		7.36856e+07
TRIM24	8.81856e+06		7.28637e+07	72863739
ZNF384	2.24219e+06		72397819	72397819
LYPLA2	6.06572e+07		70458602	70458602
MED15	2.64284e+07		70406819	70406819
CYLD	7.63513e+07		70384604	70384604
JUND	7.03132e+06		7.02434e+07	70243382
CEP97	6.56517e+07		6.97469e+07	69746906
ZMIZ2	3.60647e+06		6.90036e+07	69003620
MIDEAS	2.61052e+06		6.80755e+07	68075480
UTP20	3.55844e+07		6.73305e+07	67330466
NRIP1	2.60686e+06		6.71752e+07	67175223
CRIP2	8.47706e+07		6.68985e+07
ZMIZ1	2.62629e+06		6.68653e+07	66865292
XRN1	7.68205e+07		6.65096e+07	66509627
GAPDH	6.10296e+07		6.57511e+07
PIK3C2A	8.39553e+07		6.56949e+07
ABRAXAS2	5.09858e+07		6.44778e+07	64477755
SYTL4	7.3606e+07		6.43526e+07	64352562
AGO2	5.40854e+07		6.18546e+07
NFIB	2.57634e+06		6.03774e+07	60377425
MYO6	8.54872e+07		59031385	59031385
MAGED1	4.8187e+07		5.90303e+07
FOSL2	7.24705e+06		5.86644e+07	58664422
TRERF1	3.25535e+06		5.80364e+07	58036428
EP300	1.28727e+06		5.43066e+07	54306596
OCRL	8.53261e+07		5.39535e+07
LASP1	6.7539e+07		5.36103e+07	53610272
SF1	1.11931e+07		5.27774e+07	52777442
RPRD2	1.70504e+07		5.25303e+07	52530311
KLF5	3.13575e+06		5.24267e+07	52426739
NFIC	4.63249e+06		5.15557e+07	51555682
SIX4	1.08503e+07		5.10771e+07	51077088
SOX9	8.62299e+06		4.99781e+07	49978083
BCOR	1.51244e+06		4.96754e+07	49675419
ANKRD17	6.11518e+07	4.87738e+07
CMTR1	4.31673e+07		4.73699e+07	47369863
ARNT	2.08827e+06		4.36313e+07	43631331
AQR	2.01524e+07		4.27043e+07	42704317
DCAF7	7.30402e+06		4.25045e+07	42504543
RPA1	2.4152e+07		42005079
C15orf39	654329		4.16959e+07	41695922
RBM33	2.67799e+06		4.04093e+07	40409347
SIDT1	1.87666e+07		3.96658e+07	39665778
APBB1	4.52191e+07		3.91229e+07	39122863
ETV4	2.8093e+06		3.91053e+07	39105350
PYGO2	6.12747e+06		3.88959e+07
FBRS	5.01921e+06		3.80998e+07	38099802
CUX1	1.11801e+07		3.80436e+07	38043592
DLD	2.94498e+07		3.79672e+07	37967198
PDAP1	5.6288e+07		3.79078e+07
PRRC2A	2.18104e+07		3.77577e+07
SMARCE1	1.65171e+07		3.71453e+07	37145287
MAML2	1.46019e+06		3.69762e+07	36976190
PMS1	2.87282e+07		3.69614e+07	36961399
HNRNPUL1	4.89044e+06		3.67698e+07	36769808
CPSF6	1.40266e+07		3.64967e+07
PATL1	5.45932e+07		3.60517e+07
NFATC2	1.41586e+07		3.57024e+07	35702366
AHCYL1	3.33452e+07		3.56183e+07	35618345
YWHAZ	2.49638e+07		3.53781e+07	35378141
MADD	5.39931e+07		3.49101e+07	34910100
BCAS3	5.28465e+07		3.48863e+07
AHR	2.75645e+07		3.4886e+07	34886006
NAB1	1.25667e+07		3.48523e+07	34852338
TTC28	32168160		34565571	34565571
LIMD1	5.02813e+07		3.44498e+07
HIPK2	689199		3.40998e+07	34099820
MAMLD1	9.3306e+06		34016655	34016655
CPSF7	6.35105e+06		3.33544e+07	33354415
AIP	4.32701e+07		32482319	32482319
HOXA13	1.01208e+06		3.24155e+07	32415513
BCAR3	3.78398e+07		31997032	31997032
APOBEC3C	2.27834e+07		3.19534e+07	31953378
DVL3	4.12836e+07		3.12935e+07	31293508
HPGD	2.75729e+07		3.12586e+07	31258614
PIAS2			3.09114e+07	30911411
NEK9	5.17293e+07		3.06189e+07
MGA	1.45436e+07		3.02475e+07	30247538
SLC16A3	2.99681e+07		2.927e+07	29269988
MAML1	1.61897e+06		2.90337e+07	29033699
ABCF3	5.22611e+07		29027324
MTCH2	2.03829e+07		2.82808e+07	28280761
PIK3C3	4.04335e+07		2.78563e+07	27856340
PKP2	1.34621e+07		27733650	27733650
PIAS1			2.76115e+07	27611521
ACTL6A	1.2507e+07		2.74898e+07	27489797
DERL1	2.02683e+07		2.70508e+07	27050814
FAM168A	5.56054e+06		2.6754e+07	26753995
CREBBP	178521		2.63735e+07	26373508
RBM27	1.60781e+06		2.61524e+07	26152444
NUP88	1.92865e+07		2.58262e+07
MEF2D	1.50437e+06		2.55214e+07	25521387
RHEB	3.35179e+07	2.5046e+07
CNOT8	1.98661e+07		2.48115e+07	24811461
ZC3H14	1.08931e+07		24213419
SMARCC1	1.1197e+07		24132274	24132274
KANK1	3.23989e+07	2.40987e+07
HDAC1	3.50306e+06		2.40484e+07
PPP6R1	37726994		2.39265e+07
NCOA1	3.03347e+06		2.39171e+07	23917122
CDKN2AIP	1.12228e+07		2.39055e+07	23905457
YTHDF1	1.34804e+07		2.38296e+07
TMED10	30974621		2.37203e+07	23720292
ZFP91	1.33415e+07		2.34914e+07
CCNT1	1.36729e+07		2.34411e+07	23441066
AKAP8	7.74895e+06		2.31186e+07	23118568
ABLIM3	1.63157e+07		2.31098e+07	23109755
PPP1R13L	2.40732e+07		22852167	22852167
SLAIN2	2.84576e+07		2.27627e+07	22762669
NFIA	382553		2.22644e+07	22264386
ZNF217	4.56929e+06		2.21002e+07	22100168
VCPIP1	3.92314e+07		2.16807e+07
COG1	3.1558e+07		2.16136e+07
PEX5	2.44108e+07		2.14365e+07	21436527
XIAP	1.36128e+07		2.13357e+07	21335749
FOXK1	4.17137e+06		2.11309e+07	21130903
HLCS	2.49336e+07		2.10789e+07	21078892
RAI1	753682		2.08997e+07	20899718
BIRC2	1.25069e+07		2.08899e+07	20889877
TTC9C	3.27543e+07		2.06559e+07	20655915
WIZ	867838		2.06374e+07	20637366
KLF10	2.81987e+06		1.9849e+07	19848966
CSNK2B	6.68531e+06		1.97707e+07
BCL6			1.90074e+07	19007417
TCF7L2	297233		1.90058e+07	19005814
THADA	30324937		1.89692e+07	18969234
SCAMP3	1.27546e+07		1.89045e+07	18904455
ALDOA	1.46774e+07		18885992	18885992
UNC45A	3.8143e+07		1.87843e+07	18784337
NFIL3	1.23996e+06		1.8737e+07	18736978
HDAC2	4.52129e+06		1.87317e+07
SMARCB1	8.59917e+06		1.87143e+07	18714340
ACOT1	2.4105e+07		1.85344e+07	18534430
CSNK2A2	4.11941e+06		1.83012e+07	18301217
RBM12	6.41375e+06		1.80749e+07
ATG2B	3.56116e+07		1.76434e+07
NCOA6	1.5252e+06		1.76003e+07	17600304
PHAF1	18576951		1.72814e+07	17281373
TNRC18	264102		1.71625e+07	17162472
NACC1	5.755e+06		1.70478e+07
SLC2A1	10537714		1.665e+07
ZBTB33	790943		1.65274e+07	16527431
RIMKLA	2.06391e+07		1.64242e+07	16424165
BRD4	3.2588e+06		1.60827e+07	16082706
PAX9			1.60759e+07	16075938
SNX7	2.73509e+07		1.60229e+07	16022949
MINK1	2.34588e+07		1.6015e+07	16014967
ANK3	9.06939e+06		1.59657e+07
TSC22D4	3.05456e+07		1.58911e+07
TACC2	2.44255e+07		1.58569e+07	15856887
EYA3	3.3514e+06		1.58046e+07	15804594
PFDN6	2.89984e+07		15561412	15561412
NOSIP	5.91384e+06		1.55499e+07	15549914
ELP6	2.29084e+07		1.54649e+07	15464879
GIGYF1	9.22524e+06		1.53348e+07	15334836
SMARCD2	5.15973e+06		1.53285e+07	15328526
RXRA			1.53261e+07	15326064
YWHAE	1.03956e+07		1.53007e+07	15300726
CPEB4	8.96942e+06		1.52713e+07	15271348
SHC4	1.76633e+07		1.52656e+07	15265559
SIM2	1.43102e+06		1.4978e+07	14978047
TRPS1	1.10787e+06		1.49016e+07	14901570
ANKHD1	1.13844e+07		1.48239e+07
SUB1	4.51393e+06	1.47942e+07
TLE3	1.2423e+06		14793875	14793875
NRBP1	1.87752e+07		1.46629e+07
ZC3H12C	1.28964e+07		1.4501e+07	14500974
MECOM	951065		14310386	14310386
LGALS1	1.11086e+07		1.42641e+07
EIF3H	1.59983e+07		1.42514e+07
ATXN2	9.16544e+06		1.42344e+07
GSE1	672080		1.42275e+07	14227512
DNAJB2	1.01636e+07	1.37377e+07
KMT2C	1.43018e+06		1.35191e+07	13519053
ETS1	224951		1.33627e+07	13362670
UEVLD	1.92745e+07		1.33376e+07
SBNO1	1.211e+07		1.30533e+07	13053269
USP54	6.51796e+06		1.28755e+07	12875537
MB21D2	2.27277e+07		1.28634e+07
KDM3B	9.82775e+06	1.27636e+07
CORO7	2.15786e+07		1.27572e+07	12757241
AFTPH	1.71855e+07		1.26965e+07
GPS2	1.05767e+06		1.2675e+07	12675018
SUCLG1	2.98583e+06		1.26429e+07	12642919
KLF4			12409882	12409882
NUDCD2	1.91653e+07		1.22553e+07	12255325
MED1	2.32985e+06		1.20322e+07	12032150
USP15	15756093		1.20209e+07
MT-ATP6	1.09827e+07		1.19653e+07	11965341
KMT2E	1.01847e+06		11827651	11827651
PRRC2B	4.71744e+06		1.18236e+07	11823551
RUNX1	1.98587e+06		11547647	11547647
IRF2BPL	3.14036e+06		1.14456e+07	11445579
RNF121	8.57577e+06		1.12728e+07
MORC4	501548		1.11648e+07	11164836
BHLHE40			1.10679e+07	11067899
FAM193A	1.24661e+07		1.10047e+07	11004707
PPARG	547038		10942293	10942293
SMAP1	1.2065e+07		1.09147e+07
CEP350	8.18628e+06	1.08514e+07
FNDC3B	5.04507e+06		1.07195e+07	10719493
TDP2	9.66443e+06	10631573
VBP1	1.99157e+07		1.04566e+07	10456624
ATF7	506014		1.02558e+07	10255773
BIN2	1.40519e+07		1.01793e+07	10179300
SIRT1	291322		9.96761e+06	9967605
VDAC3	1.08213e+07		9.94171e+06
YWHAB	6.23542e+06		9.91941e+06	9919411
CPSF3	1.44751e+07		9.91681e+06	9916806
SLC35E1	7.97192e+06		9.87603e+06	9876032
NEBL	8.80549e+06		9.87076e+06	9870762
VPS37A	15810627		9.7262e+06
ELP4	1.25762e+07		9.58061e+06	9580605
FOXJ3	542848		9.51631e+06	9516314
PFDN1	1.67989e+07		9.41126e+06
RAF1	469501		9.38113e+06	9381134
HDAC3	790797		9.28611e+06	9286110
PTPN14	1.15326e+07		9.26549e+06	9265493
FBRSL1	1.27192e+06		9.18567e+06	9185675
TBC1D8	1.30052e+07	9.06831e+06
MED12	559432		9.04992e+06	9049919
CRTC2	1.20228e+06		9.00098e+06	9000978
PIAS3			8.87959e+06	8879590
KMT2D	846446		8.72199e+06	8721987
USP34	3.2294e+06		8.54582e+06	8545824
TEAD1	783497		8.39517e+06	8395172
PGAM1	6.7309e+06		8.37266e+06	8372661
TAB2	1.02648e+07		8.35819e+06	8358186
STEEP1	2.25498e+06		8.27918e+06	8279180
KHDC4	357883		8.26023e+06	8260233
CRTC3	2.19248e+06		8.22509e+06	8225086
TFAP2C	725192		8.17775e+06	8177747
PFDN2	3.00516e+07		8.08661e+06
SKI	332568		7.93863e+06	7938631
TXNL1	8.65361e+06		7.91531e+06	7915306
VGLL4	465844		7.71082e+06	7710815
RB1		7.70918e+06
SLC38A2	8.79812e+06		7.70687e+06
ZBTB10	1.02002e+06		7.6953e+06	7695298
ETV5			7.65586e+06	7655862
SMG7	10917850		7.58541e+06
LDB1	676052		7.41635e+06	7416345
ESS2	1.10178e+06		7.39871e+06	7398709
WASL	8.33908e+06		7.29495e+06	7294947
NEK1	1.02278e+07		7.17361e+06
CRCP	8.94393e+06		7.14675e+06	7146745
HIVEP2	2.75137e+06		7.11294e+06	7112938
PHF14	254748		7.09668e+06	7096677
TBX1	515847		6.84969e+06	6849694
MBOAT7	5.40662e+06		6.84632e+06	6846323
BHLHE41	3.21257e+06		6.78532e+06	6785315
DPYSL4	1.17661e+07		6.76222e+06	6762225
TTC1	1.02002e+07		6.73486e+06
TTN	365625		6.73172e+06	6731718
RCOR1	2.09028e+06		6.72579e+06
ZNF703	616607		6.67924e+06	6679243
PAXIP1	984612		6.6422e+06	6642201
TTC4	11094480		6.47368e+06	6473679
CCZ1	9.27586e+06		6.46102e+06	6461022
DLX1			6.42894e+06	6428945
RRM2	2.33069e+07		6.34074e+06	6340744
CSTF2T	3.31888e+06		6.32865e+06	6328648
ETV3	492146		6.30939e+06	6309386
ALDH1A3	1.63104e+07		6.23034e+06
RBM4	1.07715e+06		6.22679e+06	6226789
RING1			6.16922e+06	6169217
PIKFYVE	1.1224e+07		6.12461e+06	6124606
NEDD1	1.0258e+07		6.0436e+06	6043601
DNAJB11	4.04523e+06		5.99498e+06
VEZF1	929960		5.93915e+06	5939150
SAV1	5.25622e+06		5.9381e+06	5938105
FRMD6	4.89904e+06		5.90171e+06	5901712
KANK2	8.16437e+06		5.81688e+06
STXBP4	7.10386e+06		5.77003e+06	5770025
TFAP2D	569543		5.71387e+06	5713867
TMCO1	2.33323e+06		5.70121e+06	5701214
SURF4	2.98564e+06		5.69808e+06	5698085
GLI3	3.36218e+06		5.65621e+06	5656215
ATP5MK	3.89125e+06		5.65366e+06
DVL2	1.28508e+07		5.64955e+06	5649553
PPP2R2A	2.90988e+06		5.62548e+06
PKP3	3.7514e+06		5.62166e+06
GTF2A1	3.43568e+06		5.57277e+06	5572773
DCD	8.46307e+06		5.5127e+06	5512697
CHGB		5.50092e+06
CEBPB			5.48594e+06	5485938
POLR2M	5.22631e+06		5.38674e+06	5386740
KDM2B	511394		5.35643e+06	5356428
PPDPF	5.15635e+06		5.24386e+06	5243859
SLC35F2	5.83415e+06		5.24031e+06
PPIL3	1.05255e+06		5.18281e+06	5182806
ZNF318	792738		5.08304e+06	5083037
HACD3	9.86058e+06		5.04291e+06	5042911
SS18	1.28043e+06		5.03295e+06	5032951
SKP1	2.91289e+06		5.031e+06
JAGN1	4.37128e+06		5.02787e+06
PFDN5	8.96418e+06	4.92197e+06
KIAA1191	8.95515e+06		4.76804e+06	4768039
JCAD	5.61683e+06		4.7481e+06	4748096
EMSY	2.31977e+06		4.74143e+06	4741433
PTGES3	6.47818e+06		4.73203e+06	4732026
ELP5	9.48294e+06		4.71701e+06	4717006
TAF9	2.21892e+06	4.62366e+06
PHF21A	1.9453e+06		4.60321e+06	4603208
VPS18	4.02819e+06		4.60193e+06
IST1	4.65367e+06		4.50574e+06
AMPD3	8.78119e+06		4.47733e+06
ZNF362			4.39087e+06	4390868
GLIS3			4.38529e+06	4385290
TRIP10	6.87203e+06		4.37956e+06	4379558
CADPS2	1.11968e+07		4.32893e+06	4328935
C3P1	2.60577e+06		4.29328e+06
THEM6	3.00639e+06		4.2663e+06	4266300
PFDN4	6.68152e+06		4.24019e+06	4240193
ALDOC	1.96571e+06		4.22202e+06	4222015
S100A16	3.96284e+06		4.20757e+06
LIN54	751940		4.15333e+06	4153328
ERF	418818		4.13653e+06	4136528
DPF2	981723		4.10462e+06	4104619
TOMM40	1.67746e+06		4.08998e+06
VPS39	1.37075e+07	4.02674e+06
MED17			3.96764e+06	3967642
RAVER2	659281		3.93843e+06	3938428
MAML3	484146		3.77488e+06	3774878
MED27	928747		3.77469e+06	3774692
CLOCK	2.25408e+06		3.77404e+06
NDUFAF7	6.39612e+06		3.77031e+06	3770310
SMARCD3	3.00242e+06		3.72097e+06	3720965
RC3H1	1.71697e+06		3.67066e+06	3670660
GATA6	510237		3.6497e+06	3649699
PRICKLE1	3.14303e+06		3.5029e+06	3502896
KAT6B	617255		3.43261e+06	3432615
SHROOM3	3.61055e+06		3.40039e+06	3400386
RNH1	1.0155e+06		3.36588e+06	3365876
KDELR1	974571		3.34956e+06	3349563
IPMK	2.34726e+06		3.31307e+06	3313075
LAMTOR1	3.86291e+06		3.29707e+06	3297069
SSBP2	461041		3.29237e+06	3292370
RICTOR	4.42763e+06	3.26316e+06
BCL7A	1.58211e+06		3.26137e+06	3261374
CAV1	4.67536e+06		3261068	3261068
WIPI1	3.83425e+06		3.23374e+06
NDUFS3	3.18555e+06		3.04823e+06	3048234
CEP192	6.27156e+06		3.02643e+06
TANC2	4.2966e+06	3.00871e+06
KLHL13	3.24621e+06		2.99218e+06
MGST3	1.9885e+06		2.98885e+06	2988851
TCF3			2.97656e+06	2976563
YWHAG	2.02417e+06		2.96288e+06	2962882
SLU7	685952		2.96057e+06	2960573
TANK	4.43309e+06		2.84526e+06	2845260
GLUL	3.40565e+06		2.80717e+06
GABPA	1.61207e+06		2.79897e+06	2798968
CCDC102A	6.12037e+06		2.7927e+06	2792695
PRKAG1	2.71282e+06	2.76556e+06
ALDH7A1	2.88296e+06		2.76389e+06	2763887
NUDCD3	9.75246e+06	2.7475e+06
FOXK2			2.73943e+06
TCF7L1			2.70179e+06	2701788
CBFB	779621		2.68296e+06	2682961
TM7SF2	1.82848e+06	2.63679e+06
TRIM9	3.11518e+06		2.58965e+06	2589646
SPART	4.91292e+06		2.56857e+06
MIER1	1.1035e+06	2.53984e+06
CDIPT	2.30763e+06		2.49717e+06
NME2	2.01833e+06		2.488e+06	2487999
FAM117B	3.21295e+06		2.47048e+06	2470484
PDLIM4	4.20574e+06		2.46526e+06	2465259
GAB1	6.85771e+06		2.34366e+06	2343659
MED30			2.32397e+06	2323965
SAP130			2.3239e+06	2323901
MIB2	1.74274e+06		2.2436e+06
RBMS1	1.52039e+06		2.22023e+06
ERRFI1	3.45812e+06		2.21602e+06	2216020
SMARCD1	652860		2.21311e+06	2213111
SDHA	852372		2.08534e+06	2085345
L3MBTL2	838055		2.077e+06	2076995
BAHCC1			2.06556e+06	2065564
POM121	948670		2.05762e+06	2057616
NIPBL		2.04141e+06
NFRKB	577553		2.03485e+06	2034853
AKAP8L	1.29443e+06		2.02496e+06	2024961
LBR	4.07264e+06	1.94843e+06
TBC1D8B	5.94528e+06		1.93856e+06	1938558
MED20	558763		1.90404e+06
PPP6R2	1.1578e+06		1.83319e+06	1833188
ARHGAP27	1.54159e+06		1.8113e+06
IRF2BP2	711939		1.8109e+06	1810900
TLK2	1.2343e+06		1.80559e+06
INVS	983008		1.80436e+06	1804362
YEATS2	1.19437e+06		1.7956e+06	1795598
PIGU	2.04411e+06		1.77667e+06
STRN4	2.39445e+06		1.76414e+06
SARG	2.88405e+06		1.7505e+06	1750503
FAM168B			1.74794e+06	1747939
TMED5	1.22951e+06	1.73647e+06
HARS1	700890		1.73485e+06	1734851
WDFY1	2.94966e+06		1.72582e+06	1725825
APEH	2.21945e+06		1.71332e+06	1713319
TAB3	2.5022e+06		1.7017e+06	1701698
NR2F2			1.69267e+06	1692670
SNF8	2.0045e+06	1.64974e+06
UBAP1	4.618e+06	1.64604e+06
CAT	1.14347e+06		1.57601e+06	1576015
DNTTIP1	309910		1.57235e+06	1572348
ISY1		1.55497e+06
LYRM7	2.14911e+06		1.54652e+06	1546519
TMEM41B	1.61684e+06		1.53219e+06
KDM6A	742546	1.51452e+06
WDR83	880571		1.51389e+06	1513886
PPP1R15B	4.06071e+06		1.49468e+06	1494681
PNP	3.25096e+06		1.4942e+06
CAMSAP3	3.49653e+06	1.47001e+06
CCHCR1			1.46187e+06
PPIL2			1.46058e+06	1460579
SP2		1.43383e+06
GFPT2	1439782	1.3902e+06
KDM3A	875847		1.37515e+06	1375148
CCDC50	6.66277e+06		1.35385e+06	1353850
TSTD2	1.27004e+06		1.33059e+06	1330591
PAGR1		1.3094e+06
TDRP	2.33216e+06	1.30646e+06
MED28	552834		1.28111e+06	1281113
GLMN	6.97647e+06		1.25326e+06	1253262
SOX21	549883		1.24577e+06	1245768
HMGN1	840170		1.2291e+06
GLCCI1	1.74141e+06		1.22089e+06	1220894
EI24	1.00642e+06		1.2122e+06	1212203
MAPT	4.29365e+06		1.17466e+06	1174656
SPRY4	5.4976e+06		1.17338e+06	1173375
CASP14	1.31727e+06		1.15151e+06	1151509
DROSHA	337076	1.11451e+06
FOXP4	244543		1.10201e+06	1102013
ZFHX4	345670		1.08214e+06	1082137
MED8	788347		1.066e+06	1066001
ADO		1.06425e+06
EP400	422071		1.0258e+06	1025804
NDUFV1	1.83507e+06	1.01577e+06
NR3C2	779196		992627	992627
ZSWIM8	1.28815e+06		991471
UBN2		948331
PLIN4	507548		904615	904615
IP6K1	1.16889e+06	900646
SPICE1	2.81838e+06		886674	886674
CEP152	3.88342e+06	842155
CAPN15	1.89665e+06	820416
MPP1	872424		803146
MAPK8IP3	1.48364e+06	778118
CLNS1A	1.39444e+06	768660
HAUS7	859094		763784
ZWINT	1.98979e+06	757437
GDI2	637258		728340	728340
IDE	1.20347e+06	700561
TOMM34	1.63297e+06	608410
PPP1R13B	1.86762e+06		606581
YIF1A	498626		524192	524192
BUB1	3.46059e+06	483403
HLA-A	140172	196391
TPI1	211022	176147
CCT8	2358827117	1646681094
AHNAK2	1670753354	848526327
EIF4G2	631729907	472653012
MAP1B	687888362	420577776
DPYSL2	151227111	109410066
CRYBG1	162489288	8.77286e+07
ASCC3	142040967	78282775
PXN	120140750	7.34032e+07
JPT1	8.89484e+07	7.3296e+07
PLAA	8.63172e+07	7.0787e+07
PSMD2	116485163	5.78204e+07
CRYBG3	9.0827e+07	4.95346e+07
GSPT2	7.17624e+07	4.81855e+07
SYAP1	7.02452e+07	4.53478e+07
TMEM263	5.6473e+07	4.28667e+07
SRP54	5.19138e+07	4.02341e+07
WIPI2	5.69923e+07	3.50243e+07
JPT2	6.75887e+07	3.43977e+07
ARHGAP35	5.47991e+07	3.4097e+07
MAVS	5.40153e+07	3.39921e+07
PPP6R3	4.18804e+07	3.15974e+07
CC2D1A	5.71598e+07	2.74585e+07
SHTN1	5.97144e+07	2.54923e+07
HAUS6	5.32297e+07	2.38174e+07
ZFYVE1	5.0806e+07	2.31152e+07
ZC3HAV1	6.3047e+07	22279736
PKN1	4.92695e+07	1.91511e+07
ATG2A	1.46211e+07	1.72043e+07
PPP1R2	26418020	1.71658e+07
RPAP3	40479757	1.69002e+07
BCAR1	3.22803e+07	16387636
ASAP1	3.14641e+07	1.58496e+07
NUDT5	2.18704e+07	1.57459e+07
AMPD2	3.23509e+07	1.51702e+07
DDHD1	1.90211e+07	1.29659e+07
ESYT2	2.4258e+07	1.28184e+07
DAD1	1.57556e+07	1.2705e+07
STIP1	1.87099e+07	1.22771e+07
TRIP11	6.56509e+07	1.22314e+07
RNF214	1.86894e+07	1.18968e+07
ELP1	1.73791e+07	1.11288e+07
TACC1	1.76547e+07	1.00524e+07
FKBP4	1.52125e+07	10009563
MAPRE1	1.5662e+07	9.23761e+06
CBL	1.30589e+07	9.20941e+06
TRAPPC9	1.44453e+07	9.17151e+06
CALD1	1.82721e+07	8.97862e+06
ARL2	1.01101e+07	7.9537e+06
BAG3	1.18482e+07	7.67695e+06
PIH1D1	1.69277e+07	7.65308e+06
CHMP4B	1.12227e+07	7.32508e+06
PLEKHA2	9.82788e+06	7.30489e+06
KIF16B	1.32129e+07	7.15331e+06
AP4E1	1.04281e+07	6.96525e+06
EIF4H	7.18908e+06	6.80078e+06
ELOB	9.92232e+06	6.24419e+06
S100A9	1.58651e+07	6.11236e+06
SLC16A1	8.43209e+06	5.66781e+06
CBLB	1.24985e+07	5.52238e+06
SNAP29	1.01897e+07	5.27336e+06
MRPS31	8.13487e+06	5.15132e+06
NRBF2	1.20975e+07	5.1362e+06
NME1	6.52836e+06	5.07685e+06
SLC35B2	6.49857e+06	4.99731e+06
MISP	5.88452e+06	4.52844e+06
DOCK6	2.25467e+07	4.21477e+06
PSMA6	6.08951e+06	4.17535e+06
ENSA	7.68885e+06	3.95191e+06
KRTCAP2	4.21547e+06	3.90841e+06
BUB1B	9.26756e+06	3.7317e+06
WDCP	5.9414e+06	3.72363e+06
CTU2	8.06659e+06	3.70702e+06
KIAA1671	4.83439e+06	3.61711e+06
SLC12A2	5.03898e+06	3.55729e+06
WDR45	8.00156e+06	3.49424e+06
SMG9	8.28069e+06	3.46484e+06
AGR2	2.82809e+06	3.39009e+06
DCP1A	9.23591e+06	3.2408e+06
INPPL1	4.27489e+06	3.21596e+06
POLR3A	1.03122e+07	3.18214e+06
KNL1	6.00411e+06	3.14551e+06
CISD1	7.13531e+06	3.05323e+06
TTK	5.99607e+06	3.00276e+06
NR3C1	4.14187e+06	2.87676e+06
RASA1	6.00615e+06	2.87257e+06
ASAP2	4.80331e+06	2.87086e+06
DNAJC11	4.07488e+06	2.86576e+06
NCK1	9.29065e+06	2.82671e+06
C1orf198	4.69529e+06	2.71054e+06
HSPA4	5.86384e+06	2.68605e+06
TAB1	6.59501e+06	2.42993e+06
STAT2	6.11829e+06	2.41471e+06
PIK3CA	3.82097e+06	2.29177e+06
CDC42EP2	5.10513e+06	2.20199e+06
ANKS1A	6.81772e+06	2.01895e+06
GRK2	3.50765e+06	1.88123e+06
PACS1	3.86072e+06	1.82012e+06
N4BP1	4.82726e+06	1.75511e+06
CNOT3	1.601e+06	1.64919e+06
NAA30	3.7325e+06	1.63121e+06
BYSL	3.36915e+06	1.56921e+06
EXOC7	4.07989e+06	1.50908e+06
TMSB4X	1.9708e+06	1.50772e+06
CIAPIN1	2.7179e+06	1.50263e+06
AKAP1	4.04615e+06	1.4917e+06
CDC37L1	5.39407e+06	1.42651e+06
CALML5	3.48857e+06	1.40629e+06
PALS1	8.54107e+06	1.39322e+06
VPS11	2.1401e+06	1.37496e+06
SNAP47	2.63476e+06	1.35514e+06
TBC1D23	5.21968e+06	1.30921e+06
NEDD8	3.17096e+06	1.27079e+06
PHKA1	2.59843e+06	1.23029e+06
PPIP5K2	2.09626e+06	1.21621e+06
MCM3AP	1.05134e+06	1.20447e+06
SMCR8	2.22401e+06	1.18338e+06
LYZ	46255038	1.17776e+06
MVP	5.20361e+06	1.14867e+06
ECH1	1.85006e+06	1.10199e+06
MIS18A	1.44206e+06	1.03959e+06
NDUFS2	1.56289e+06	997643
MICAL1	8.84145e+06	996637
KIF13B	1.71191e+06	915616
ARHGAP31	1.93799e+06	895214
USP47	8.38259e+06	893758
OLA1	1.57879e+06	872953
NDUFS1	2.24133e+06	747308
TXNRD1	1.70713e+06	632981
ALMS1	3.70039e+06	613277
MAP4K3	811044	600344
KIF1C	873511	600249
PARP4	1.88761e+06	580282
CCP110	743053	542632
AZI2	561762	536222
SCFD2	1.62705e+06	466430
PKP4	1.26306e+06	382860
SYNJ1	958552	375799
SIPA1	1.15464e+06	344234
AGAP3	1.6327e+06	330387
SKA3	1.01499e+06	180923
ANKRD18B	1.66071e+06
BPIFA1	1.44982e+07
BPIFB1	4.68274e+06
CASKIN2	400780
DMBT1	5.28828e+06
EGLN1	1.56126e+06
IGLC3	1.83688e+06
LACRT	7.42278e+06
LCN1	9.90983e+06
LTF	535661
PIGR	3.31324e+06
PIP	2.42471e+06
SCGB2A1	1.08205e+07
SEMG1	1.66319e+06
TGM3	327938
ZG16B	6.84887e+06

## Sheet: EDF3G
Source data for Supplementary Figure 3G
	T0	T60	BFDR<0.02 T60	FC>3 T60
NPEPPS	6335279805		5027671730	5027671730
LMNA	1352953067		4443475201	4443475201
EIF2B3	156661260	3977575315
NONO	2558329987		3319370346	3319370346
SFPQ	5491766352		3309369717	3309369717
NUP214	1650943309		2101545231	2101545231
H4C1; H4C2; H4C3; H4C4; H4C5; H4C6; H4C8; H4C9; H4C11; H4C12; H4C13; H4C14; H4C15; H4-16	1579127827		1723397600	1723397600
RBM14	1015710349		1713702262	1713702262
UBAP2L	4826741217		1603574563	1603574563
BCL9L	1418384247		1572054102	1572054102
TFDP2	2136275690		1526642789	1526642789
INTS13	1448440885		1467528377	1467528377
PRDX1	485298084		1444177897	1444177897
EEF1A1	850668080		1224615449
CHN2	997870835		1184635504	1184635504
SYCP1	804358624		1150016192	1150016192
DSP	914772470		1146185346	1146185346
NUP98	326862722		1052329342	1052329342
NUP153	976506111		1042276172	1042276172
HSPA5	865721738		931992781
TMEM263	316414761		801276116	801276116
HSPB1	1274236294		747631302	747631302
CAD	450812172		718697148	718697148
VDAC2	288638208		696929391	696929391
PRRC2C	1310201930		613514935	613514935
NUP88	1.67122e+06		612619113	612619113
JMJD1C	297078956		557375908	557375908
RPN2	148039725		550857898	550857898
RAE1	184326372		540087819	540087819
ATN1	854804682		533898335	533898335
GRIPAP1	426804646		532972673	532972673
TUFM	217117282		530229205	530229205
HELZ	8.55236e+07		486601621	486601621
DMD			471809698	471809698
AGO2	105500792		471786328	471786328
FLNC	103143996		471752175
FXR1	2.83086e+07		455418368	455418368
CEP85	7.33795e+06		452131678	452131678
RPS3	448441028		445475124
PKM	1062421908		436642225	436642225
MTHFD1	339643553		418704596
NUP62	412624665		411185100	411185100
CTTN	114307139		410496340
PYGB	329348751		401417738
ACTG1	867910757		394634192
TNRC6A	8.10344e+07		393436836	393436836
DNAJA3	5.00077e+07		389910900	389910900
HNRNPK	629838162	364787693
S100A9	423201414		362347434	362347434
UTP20	331549017		336623085	336623085
PCBP1	163681397		329620473	329620473
EIF4A1	206869037	311557980
LGALS1	403490157		311456273	311456273
RPS4X	336405582		306453424
WDR5	794992778		303873059	303873059
MAGED1	583299675		302212409	302212409
ATP5F1A	465749609		297347674
TNRC6B	2.47688e+07		296903595	296903595
PCBP2	58806414		286479772	286479772
LMNB1	116775981		284315247	284315247
JUP	231946194		274071970	274071970
CSTB	250414523		269967048	269967048
PABPC1	272437548		260480440
DDX17	196684705		255176486	255176486
HNRNPC	123466774	250624316
RPS7	197251674	247450060
SIDT1	219394479	245824238
SRRM2	449459728		244449647
RERE	354755270		239807460	239807460
ANXA7	251608312		238527926	238527926
SEC24C	232696995		233945005	233945005
ANKRD17	135132579		232064637	232064637
TECR	6.49435e+07		229811394	229811394
RPSA	130526189		225720847
RPLP2	195214385		225042741
RPS9	217345601		223858950
DDX21	113581045	223125519
TMED10	5.14236e+07		222652988	222652988
RPLP1	175802578		222219783
SHMT2	50302970		220862494	220862494
HSPA9	121563652		218851015
HNRNPH1	6.91054e+07		215067263	215067263
PYGO2	307739195		211445314	211445314
SYNJ2	171414774		208225625	208225625
H1-0	329704874		207687991	207687991
YTHDF1	6.50494e+07		203945221	203945221
RPL22	190236284		202350498
DAD1	8.71975e+07		200053837	200053837
RPL13	183132345		198816169
CLINT1	765628573		193467299
DDOST	4.40559e+07		191517808	191517808
HMGA1	144763618	187668556
DSG1	142376943		187411578	187411578
NCOR2	177808679		185545575
PRR12	377184728		183320001	183320001
SLC25A3	239907209	181994149
DDX3X	8.80767e+07		181365552	181365552
RPL7	128212887		180313114
SEC16A	265222141		178820344
SYNE1	6.5216e+07	177222870
DDX5	144366273		176580486
ACTBL2	370927003	175802248
RPS18	117235485		173007353
RPLP0	137044116		172898135
ATXN2	6.88257e+07		171925144	171925144
RACK1	170497193	171135388
RPS13	116996478		171002159
AGFG1	539225253		170369367
HPGD	211536496		167746775	167746775
DHX9	6.73932e+07		166525724
PCF11	1.3005e+07		164721279	164721279
RPL23A	149315132		162971925
UBE2N	201573446		161192741	161192741
SON	619824490		160846194	160846194
ZNF326	4.66147e+06		160333565	160333565
VDAC1	7.45779e+07		160205201	160205201
HSPA6	179104321		159286208	159286208
RTCB	4.9981e+07		159202841	159202841
PSPC1	147604397		157705268	157705268
RPL15	347206179		155266061
PCMT1	161855161		154662385	154662385
S100A8	160058433		153742388	153742388
RPN1	8.19721e+07		152841493	152841493
AHSA1	8.20337e+07		150311770
UBA52	203929367		149966196
ATP2A2	94236812		147970800
RPS3A	110124346	147399066
FN1	272278285		145283787	145283787
KIAA1217	4.73084e+07		144014412	144014412
KHSRP	284070832		142856515
NCOR1	5.96083e+07		141681260	141681260
NUP54	3.83252e+06		141507057	141507057
TUBB4A	5.94722e+07		140864030	140864030
DERL1	2.02405e+07		140122129	140122129
RPL11	158289976		138481903
NEK1	9.21783e+07	137765396
TUBB4B	111122469		137344079	137344079
HSPD1	155099475		136808286	136808286
FAU	181694238		132978463
BIRC2	3.28936e+07		128487143	128487143
ATXN2L	167850450		127610984
GAPDH	136264690		127206901	127206901
RPS19	9.15651e+07		125934081
RPS25	7.0906e+07		125331752	125331752
SSR4	5.6545e+07		123931726	123931726
RPL27A	109419704		123847589
ABLIM3	5.74842e+06		122814639	122814639
FAM168A	148258567		121241781	121241781
ZNF609	1.29973e+07		120537264	120537264
DNAJB2	4.0451e+07		118209686	118209686
CCAR2	3.48701e+07	117671144
IGF2BP2	123475110		114940061	122814639
ARF4	8.54629e+07		114615642
RPL27	129415797		113810447
DNAJB11	2.77715e+07		111260510	111260510
PCNA	9.861e+07		109157782	109157782
RPS20	8.03309e+07		106806749
TAF4	6.6901e+07		106740104	106740104
YTHDF3	9.90467e+07		105390045	105390045
CKAP4	114646855		102507292	102507292
RPS17	8.20454e+07		100918183
YBX1	54898711		100686879	100686879
PRDX2	5.37432e+07		9.88946e+07	9.88946e+07
AKAP8	1.04343e+07		9.77961e+07	9.77961e+07
ANK3	9.98497e+07		9.77812e+07	9.77812e+07
HNRNPH3	101138312	9.77299e+07
H1-2	8.8214e+07		9.7099e+07	9.7099e+07
RPL19	6.72191e+07		9.65588e+07
TMEM33	1.95501e+07		96311002	96311002
GSE1	160455707		9.61059e+07	9.61059e+07
C1QBP	1.15616e+07		9.46927e+07	9.46927e+07
RPL14	101698394		9.30742e+07
ACOT7	193421817		9.144e+07	9.144e+07
ACOT9	64883044		8.94454e+07	8.94454e+07
UBAP2	449697969		8.91029e+07	8.91029e+07
RPL10A	8.18184e+07		8.85392e+07
STIM1	7.74051e+07		8.80349e+07
ARF1	7.05495e+07		8.61992e+07	8.61992e+07
NCOA2	4.4733e+07		8.588e+07	8.588e+07
TRAM1	1.37591e+07		8.47192e+07	8.47192e+07
MIF	55520021		8.46309e+07	8.46309e+07
HAX1	2.74409e+07		8.36078e+07	8.36078e+07
RPL17	4.83379e+07	83335219
PPIA	6.12612e+07		8.31618e+07	8.31618e+07
PRPF4B	9.61289e+07		8.28265e+07
RB1	155114999	82517780
NSF	5.581e+07		8.15322e+07	8.15322e+07
AHR	5.86795e+07		8.07149e+07	8.07149e+07
HSD17B10	8.54211e+07		8.04922e+07	8.04922e+07
RAB6A	6.17046e+07		8.02465e+07
VDAC3	14024227		7.96694e+07	7.96694e+07
MSMP	273367102		7.78393e+07	7.78393e+07
GFPT1	4.71318e+07		7.72702e+07
DDX1	2.07273e+07		7.67785e+07
XIAP	2.37501e+07		7.66727e+07	7.66727e+07
TAB2	9.37985e+06		7.60852e+07	7.60852e+07
HDAC10	2.32748e+07		7.6031e+07	7.6031e+07
MT-ATP6	1.54236e+07		7.59072e+07	7.59072e+07
BLVRA	5.28151e+07		7.57094e+07	7.57094e+07
CASP14	6.11141e+07		7.37098e+07	7.37098e+07
ANXA11	92075178		7.36395e+07
LMNB2	1.75593e+07		7.339e+07	7.339e+07
RPS21	4.47536e+07	7.17726e+07
SUCLG1	5.90959e+07		7.07026e+07	7.07026e+07
TBL1XR1	7.96469e+06		7.06241e+07	7.06241e+07
FH	182293090	7.06109e+07
CHERP	4.35435e+07		70357574
RPL34	7.00384e+07		7.0115e+07
PPME1	7.1689e+07		6.95883e+07	6.95883e+07
G3BP1	4.0354e+07		6.94331e+07
CPEB4	9.06322e+06		6.91857e+07	6.91857e+07
SEC23A	7.03202e+07		6.9096e+07	6.9096e+07
RPL13A	8.56188e+07		6.83635e+07
JAGN1	1.8619e+07		6.82818e+07	6.82818e+07
PKP1	7.4079e+07		6.82168e+07	6.82168e+07
MTCH2	8.5221e+07		6.72487e+07	6.72487e+07
PAPSS2	3.74217e+07		6.66397e+07	6.66397e+07
HYOU1	5.71546e+07		6.66252e+07	6.66252e+07
UBE2M	5.61013e+07		6.48683e+07	6.48683e+07
RPS26	6.92102e+07		6.47107e+07
FNDC3B	3.31073e+07		6.35497e+07	6.35497e+07
FXR2	3.97104e+06		6.33044e+07	6.33044e+07
SERPINB8	3.06866e+07		6.31087e+07	6.31087e+07
NOP56	4.06136e+07		6.28963e+07	6.28963e+07
CCNT1	6.79927e+06		62313453	62313453
IMMT	122982178		6.16426e+07
FHL2	8.77197e+07		6.11996e+07	6.11996e+07
BCL9	222174756		6.11089e+07	6.11089e+07
CRKL	5.60313e+07		5.97892e+07	5.97892e+07
DERPC	6.08372e+07		5.97327e+07	5.97327e+07
FSCN1	7.40355e+07		5.78091e+07	5.78091e+07
DNAJB6	1.05434e+07		5.76501e+07	5.76501e+07
CSNK2A1	7.35631e+07	5.75049e+07
TCF12	1.83732e+06		5.73905e+07	5.73905e+07
RTRAF	1.50356e+07		5.73196e+07	5.73196e+07
CANX	6.06702e+07		5.71927e+07
HNRNPA0	4.57903e+07		5.66769e+07
RBBP5	131938130		5.61564e+07	5.61564e+07
SRP14	4.41063e+07	5.55604e+07
CEP350	265610048		5.49441e+07	5.49441e+07
ATXN1L	131506996		5.48789e+07	5.48789e+07
FABP5	6.36923e+07		5.44116e+07	5.44116e+07
NDUFA13	1.85202e+07		5.42744e+07	5.42744e+07
GET4	2.00322e+07		5.34621e+07	5.34621e+07
YTHDF2	6.09855e+07		5.26278e+07
PFN2	8.23654e+07		5.22903e+07	5.22903e+07
EIF3D	4.23282e+07	5.20934e+07
CLPB	2.49234e+07		51819200	51819200
DSTN	5.35813e+07		5.17501e+07
CCAR1	5.13259e+07		51581354	51581354
RPL26	5.48429e+07		5.14038e+07
FLOT1	44239652		5.08448e+07	5.08448e+07
RPL36	4.29379e+07		5.02984e+07
SQOR	2.96743e+07		5.02564e+07	5.02564e+07
STT3A	3.74373e+07		4.924e+07	4.924e+07
RPS27	4.77715e+07		4.91353e+07
POF1B	2.1434e+07		4.91018e+07	4.91018e+07
SLC35F2	18528156		4.90951e+07	4.90951e+07
DSC1	2.47539e+07		4.8711e+07	4.8711e+07
RER1	3.38281e+07		4.85655e+07	4.85655e+07
ANKRD18B	4.12711e+07		4.85399e+07	4.85399e+07
DCD	92409337		48377888	48377888
LUC7L2	3.71456e+07		4.81111e+07
SERPINB5	3.31759e+07		4.80181e+07
TIPRL	2.81226e+07		4.76755e+07	4.76755e+07
BIN2	51316016	4.75916e+07
SRP9	3.25927e+07		4.74795e+07
DHCR7	1.58431e+07		4.73605e+07	4.73605e+07
PDIA3	124357610		4.71132e+07	4.71132e+07
MGST1	1.21733e+07		4.69808e+07	4.69808e+07
MTPAP	5.69589e+07		4.67637e+07	4.67637e+07
PKP2	5.27344e+06		4.65974e+07	4.65974e+07
PPP2R2A	145539951		4.47893e+07	4.47893e+07
SEC23B	3.32688e+07		4.39093e+07
NUP58	1.18071e+07		4.28949e+07	4.28949e+07
DLD	5.93916e+06		42717117	42717117
GLRX	3.84779e+07		4.2011e+07	4.2011e+07
SERPINH1	2.38781e+07		4.16335e+07
PNN	4.83403e+07		4.16136e+07
RPS12	3.06841e+07		4.15458e+07
CDK5	2.30147e+07		4.15175e+07
LSM12	1.3223e+07		4.1218e+07	4.1218e+07
MBOAT7	4.7187e+06		4.05162e+07	4.05162e+07
RUNX1	1.03455e+07		3.9892e+07	3.9892e+07
TOMM40	6.25054e+06		3.9354e+07	3.9354e+07
RIPK1	1.1677e+07		3.89735e+07	3.89735e+07
BDNF	2.26688e+07	3.89373e+07
CCHCR1	4.46246e+07		3.87156e+07	3.87156e+07
ARID1B	7.45768e+07	3.84377e+07
GSK3B	1.25888e+07		3.80237e+07	3.80237e+07
PKP4	923458		3.79335e+07	3.79335e+07
PTPN1	5.91133e+07		3.71334e+07	3.71334e+07
PHB2	169353287	3.69605e+07
RALY	8.74396e+06		3.65636e+07
RPL35A	44421103		3.64641e+07
SLC35E1			3.61102e+07	3.61102e+07
FADS2	1.73727e+07	3.56248e+07
ENO1	6.24714e+07		35422195
IDE	3.42782e+07		3.53771e+07	3.53771e+07
COX17	4.41831e+07		3.49385e+07	3.49385e+07
FAM98A	7.86376e+06		3.48029e+07	3.48029e+07
UBE2D2	2.25703e+07		3.47109e+07
LCLAT1	15519702		3.45797e+07	3.45797e+07
SCAMP3	1.62589e+07		3.45148e+07	3.45148e+07
PRMT1	5.1421e+07		3.4357e+07
FBRS	1.68626e+07		34328880	34328880
CAT	2.35655e+07		3.4317e+07	3.4317e+07
CYB5R3	3.12879e+07		33600498	33600498
PHB	8.39164e+07		3.35646e+07
UQCRC2	3.30014e+07		3.31871e+07
LGALS7; LGALS7B	2.32576e+07		3.28706e+07	3.28706e+07
TMED1	6.88491e+06		3.22383e+07	3.22383e+07
MCM3AP	8.19541e+06		3.20741e+07	3.20741e+07
GSDMD	51873398		3.18227e+07	3.18227e+07
KRT6B	4.36139e+07		3.15416e+07	3.15416e+07
SEC24B	7.61449e+07		3.14162e+07
SLC25A11	2.53258e+07		3.10563e+07	3.10563e+07
KRTCAP2	9.19756e+06		3.06201e+07	3.06201e+07
RPL32	1.913e+07		3.0513e+07	3.0513e+07
MGST3	9.03556e+06		3.025e+07	3.025e+07
TGM3	2.85046e+07		2.99867e+07	2.99867e+07
BOLA2; BOLA2B	18372690		2.98853e+07	2.98853e+07
HOXB13	2.43917e+07		2.98809e+07	2.98809e+07
HIPK2	5.92662e+07		2.98772e+07	2.98772e+07
TGM2	6.78483e+07		2.9773e+07	2.9773e+07
SUB1	2.85157e+07		2.95535e+07	2.95535e+07
TMED9	1.15773e+07		2.93182e+07	2.93182e+07
EWSR1	1.41885e+07		2.92731e+07	2.92731e+07
PDHA1	3.13494e+07		2.86552e+07	2.86552e+07
DECR1	3.47206e+07	2.84669e+07
ZC3H12C			2.80654e+07	2.80654e+07
CAPZA2	1.32705e+07	2.803e+07
SRSF1	1.05463e+07		2.80151e+07
LYZ	3.77267e+07		2.77877e+07	2.77877e+07
DCAF7	3.38783e+06		2.75546e+07	2.75546e+07
ACOT13	2.37234e+07	27056365
YWHAZ	6.35571e+07		2.69647e+07	2.69647e+07
SERPINB12	2.40848e+07		2.66417e+07	2.66417e+07
BMP2K	1.60019e+07		2.63813e+07	2.63813e+07
SMC2	1.85735e+07		2.63162e+07	2.63162e+07
ASPH	2.99078e+07		2.62945e+07
TBL2	1.35661e+07		2.60671e+07	2.60671e+07
TUBA4A	2.68263e+07		2.59868e+07
P4HB	20792318		2.5986e+07
SURF4	1.33072e+06		2.56965e+07	2.56965e+07
PARK7	3.60682e+07		2.56396e+07
HACD3	1.0172e+06		2.56126e+07	2.56126e+07
SLC16A3	9.53265e+06		2.49227e+07	2.49227e+07
GMPS	1.17579e+07		2.49217e+07
H1-3	3.10991e+07	2.47889e+07
CALML5	5.27148e+07		2.46953e+07	2.46953e+07
CLP1	3.15111e+06		2.44169e+07	2.44169e+07
ALDOA	3.06804e+07		2.42739e+07	2.42739e+07
GPS2	2.05436e+07		2.40878e+07	2.40878e+07
ITGB4	3.19856e+07		2.3926e+07	2.3926e+07
LMAN1	1.41018e+07		2.37943e+07	2.37943e+07
ARL6IP4	3.17152e+07		2.36425e+07	2.36425e+07
IARS2	14291609	23413374
KDM1A	2.08181e+06		2.31872e+07	2.31872e+07
DGAT1	1.24684e+07		2.29106e+07	2.29106e+07
TUBB6	3.29726e+07		2.25519e+07	2.25519e+07
SMG7	4.44069e+06		2.24344e+07	2.24344e+07
RAB21	1.87943e+07		2.20948e+07	2.20948e+07
DPY30	3.36212e+07		2.20115e+07	2.20115e+07
EIF2AK2	6.25391e+06		2.18194e+07
HDAC2	1.51743e+07		2.17882e+07
CIZ1	9.39288e+06		2.17272e+07	2.17272e+07
TMCO1	3.9572e+06	21674694
H2AZ2	2.20187e+07		2.11773e+07	2.11773e+07
AHI1	7.65658e+06	2.11616e+07
MLEC	1.23261e+07		2.1036e+07	2.1036e+07
CSRP2	4.7534e+06		2.10348e+07	2.10348e+07
APOBEC3C	9.92338e+06		2.10203e+07
CDSN	1.95197e+07		2.10116e+07	2.10116e+07
USP15	7.72336e+06		2.10092e+07	2.10092e+07
HDAC1	1.18552e+07		20865576
S100A7	3.81657e+07		2.06696e+07	2.06696e+07
ATP5F1C	1.58624e+07		2.04119e+07
TOMM22	1.52631e+07		2.03206e+07
H1-10	2.23174e+07		2.03093e+07	2.03093e+07
TUBB3	2.47149e+07		2.01661e+07	2.01661e+07
CITED2	3.50385e+07		2.00247e+07	2.00247e+07
MBNL1	5.1229e+07		1.99288e+07	1.99288e+07
NDUFA4	8.19774e+06		1.98897e+07	1.98897e+07
NARS1	2.11616e+07		1.96209e+07	1.96209e+07
YIF1A	4.25706e+06		1.96027e+07	1.96027e+07
TGM1	1.58705e+07		1.95213e+07	1.95213e+07
TMEM41B	6.86681e+06		1.92472e+07	1.92472e+07
MSTO1	6.69982e+07	19156793
FBRSL1	5.70969e+06		1.84414e+07	1.84414e+07
GALK1	2.57676e+07		1.81168e+07	1.81168e+07
SDF2L1	1.42852e+06		1.77416e+07	1.77416e+07
ARGLU1	49981501	1.76342e+07
CALML3	1.75402e+07		1.74155e+07	1.74155e+07
PICALM	3.13596e+07		1.70988e+07
SLC33A1	6.86927e+06		1.70621e+07	1.70621e+07
SLC35B2	5.33289e+06		1.68603e+07	1.68603e+07
CSNK2A2	1.3024e+07		1.66947e+07
SMAP1	2.00377e+07		1.62774e+07	1.62774e+07
RNH1	27192668		1.62481e+07	1.62481e+07
RCOR1	4.21095e+06		1.60625e+07	1.60625e+07
SDF2	1.20071e+06		1.59967e+07	1.59967e+07
MAL2	1.94339e+07		1.5964e+07	1.5964e+07
TM7SF2	6.47658e+06		15875984	15875984
BLMH	1.35848e+07		1.58104e+07	1.58104e+07
HNRNPH2	1.48998e+07		1.57967e+07	1.57967e+07
SLC38A2	8428418		1.57615e+07	1.57615e+07
SNRPC	2.97231e+07		1.56551e+07	1.56551e+07
IFI16	3.49529e+06		1.56388e+07	1.56388e+07
ORMDL1			1.55951e+07	1.55951e+07
PYCR3	1.41546e+07		1.55276e+07
EI24	2.88072e+06		1.5387e+07	1.5387e+07
SLC25A1	1.3957e+07		1.51584e+07	1.51584e+07
PA2G4	100878144		1.50799e+07	1.50799e+07
GMPPA	5.90003e+06		1.49984e+07	1.49984e+07
RNF214	3.67284e+06		1.47319e+07
SRSF3	1.24522e+07		1.47011e+07
CARM1	2.74392e+07		1.46179e+07	1.46179e+07
PRDX5	6.43782e+06		1.4567e+07	1.4567e+07
NCEH1	3.07982e+07		14233348
METTL7B	6.2228e+06		1.42023e+07	1.42023e+07
MAGT1	5.0591e+06		1.41231e+07	1.41231e+07
RDH11	2.93279e+07		1.40739e+07	1.40739e+07
MCRIP1			1.40454e+07	1.40454e+07
GLUD1	5.7197e+07		1.39239e+07	1.39239e+07
NCCRP1	1.01441e+07		1.38639e+07	1.38639e+07
LOXL1	1.86617e+06		1.38192e+07	1.38192e+07
SERPINB3	2.58825e+07		1.38057e+07	1.38057e+07
PLD3	7.83668e+06		1.37709e+07	1.37709e+07
AIP	1.02762e+07		1.37467e+07
CHD7	1.55621e+07		1.37318e+07	1.37318e+07
PRRC2B	2.41054e+07		1.37265e+07	1.37265e+07
UBE2E1	1.08092e+07		1.35709e+07	1.35709e+07
FMR1			1.34752e+07	1.34752e+07
CTSD	1.90975e+07		1.32575e+07	1.32575e+07
ATP5PO	14720686		1.3237e+07	1.3237e+07
PPIG	2.42615e+07	1.31711e+07
BICD1	1.59113e+07	1.3115e+07
PON2	7.04417e+06		12897811	12897811
HNRNPAB	3.93177e+07	1.28301e+07
RBM33	1.00173e+07	12709237
OTUB1	2.81638e+07		1.26648e+07	1.26648e+07
DNAJB9			1.25612e+07	1.25612e+07
ACP1	2.0892e+07		1.23491e+07	1.23491e+07
PPIB	1.71759e+07		1.22925e+07	1.22925e+07
SLC16A1	4.39711e+06		1.22285e+07
ATP5MK	1.21834e+07	1.17488e+07
FHL1	1.6296e+07		1.17348e+07	1.17348e+07
PRMT5	3.04499e+06		1.17129e+07
ORMDL3			1.16854e+07	1.16854e+07
GSDMA	1.00929e+07		1.1673e+07	1.1673e+07
TPP1	7.54064e+06		1.16292e+07	1.16292e+07
WDR18	3.98682e+06		1.16264e+07	1.16264e+07
KDELR1	3.07296e+07		1.15164e+07	1.15164e+07
PMS1	1.17593e+07		1.13167e+07
TIMM13	1.11635e+07		1.12061e+07	1.12061e+07
TMEM109	9.33225e+06		1.11858e+07	1.11858e+07
TMED5			1.11043e+07	1.11043e+07
SLC25A10	6.02274e+06		1.09857e+07	1.09857e+07
RBMS1	2.19837e+07		1.0967e+07	1.0967e+07
MLF2	8.51662e+06		1.0917e+07	1.0917e+07
LPXN	11541319		1.08944e+07
CIRBP	9.70556e+06		1.08895e+07
SPCS3	1.13825e+07		1.08647e+07	1.08647e+07
ATP5MF	1.84091e+07		1.08484e+07	1.08484e+07
ARF5	9.0467e+06		1.0829e+07	1.0829e+07
YWHAE	1.0118e+07		1.08009e+07
GANAB	1.24097e+07		1.07496e+07	1.07496e+07
PSMA6	8.58486e+06		1.05917e+07	1.05917e+07
ATP1A1	8.03427e+06		1.04894e+07
PSMB1	1.20919e+07		1.04737e+07	1.04737e+07
SYNGR2	1.13712e+07		1.045e+07	1.045e+07
L3HYPDH	4.61606e+06	1.04319e+07
SUCLA2	1.31614e+07		1.04134e+07
RTN3		1.0281e+07
NEBL	8.95749e+06	1.02597e+07
SPCS2	2.21018e+06		1.02477e+07	1.02477e+07
IVL	1.04963e+07		1.01978e+07	1.01978e+07
S100A11	1.5252e+07		1.01464e+07	1.01464e+07
HADHB	9.93816e+06		1.01365e+07
ABCD3	7.60505e+06	1.01006e+07
UBE2Z	8.85361e+06		10100136	10100136
TAB1			1.00769e+07	1.00769e+07
ASL	9.15095e+06		1.00707e+07
MT-CO2	4.22097e+06		9.98145e+06	9.98145e+06
NUDT16L1	2.25886e+06	9.94564e+06
SFXN1	1.41829e+07		9.94409e+06	9.94409e+06
ZNF207	1.98076e+07	9.88952e+06
AGO3			9.82603e+06	9.82603e+06
RBPMS	8.4659e+06		9.8116e+06	9.8116e+06
FN3KRP	6.78223e+06		9.65904e+06	9.65904e+06
S100A16	1.53324e+07		9.58701e+06	9.58701e+06
CROCC	3.41306e+06	9522921
TAF6			9.40495e+06	9.40495e+06
NSDHL	7.82812e+06	9.24108e+06
C3P1	1.02819e+07	9.19762e+06
EIF6	6.56852e+06		9.12519e+06
SFXN3	1.50381e+07		9.07955e+06	9.07955e+06
GSTP1	12040874		9.0447e+06	9.0447e+06
SCP2	2.60282e+07		8.91293e+06	8.91293e+06
ZMYM4	7.68397e+06		8.86102e+06	8.86102e+06
TMX1	1.48101e+07		8.847e+06
ALDH3A2	6.32389e+06		8.7642e+06	8.7642e+06
ARAF	1.98172e+06	8.70069e+06
PSMD14	8.15161e+06		8.66283e+06
NCOA6	1.12413e+07		8.62035e+06	8.62035e+06
CCDC102A	1.81994e+07		8478405	8478405
PRSS3	21490316		8.41326e+06	8.41326e+06
GAA	1.0572e+07		8.40726e+06	8.40726e+06
SUGT1	5.59282e+06		8.23161e+06	8.23161e+06
APOB	3.97456e+07		8.20866e+06	8.20866e+06
MAML1	6.79343e+06	8.14401e+06
SMTN	2.97646e+06		7.94134e+06	7.94134e+06
GPKOW			7.85207e+06
SLC39A7	4.1749e+06	7.83092e+06
LZIC	1.03223e+07	7.82525e+06
PELO	1.98375e+06	7.77869e+06
CTBP2	3.32237e+06		7.6459e+06	7.6459e+06
SIX4	9.11972e+06		7.57892e+06	7.57892e+06
TTN	3.57864e+06	7.51754e+06
GNAI2	1.14567e+07		7.51541e+06
FAM168B	8.23942e+06		7.44623e+06	7.6459e+06
ATP13A1	2.27829e+06		7.38867e+06	7.57892e+06
SMARCD3			7.29816e+06	7.29816e+06
COX7A2	3.46263e+06		7.2051e+06	7.2051e+06
ATXN7L3B	8.9359e+06		7.01142e+06	7.01142e+06
KAT6B			6.90277e+06	6.90277e+06
TUBA1B	6.68065e+06		6.89129e+06	6.89129e+06
GSTK1	9.79633e+06		6.8654e+06
SFN	1.02541e+07		6.71127e+06	6.71127e+06
TUBA1C			6.66164e+06	6.66164e+06
MT-CYB	2.48844e+06		6.64908e+06	6.64908e+06
ARG1	4.30795e+06		6.47104e+06	6.47104e+06
TPI1	7.73231e+06		6.38936e+06	6.38936e+06
PHF3	978376		6.33039e+06	6.33039e+06
ACYP2	3.35541e+06		6.31862e+06	6.31862e+06
MAIP1	1.90905e+06		6.29972e+06	6.29972e+06
FAM120C	7.98689e+06		6.22478e+06	6.22478e+06
ADGRE5	4.0343e+06		6.1961e+06	6.1961e+06
PSMF1	1.43024e+07		6.17638e+06	6.17638e+06
SLC7A5	6.84127e+06		6.03698e+06	6.03698e+06
PRPS1	2.31674e+06		6.0313e+06	6.0313e+06
MIB2			6.01652e+06	6.01652e+06
POM121	1.67512e+06		5.93775e+06	5.93775e+06
POM121C	5.95142e+06		5.87881e+06
ALDOC	1.68421e+07		5.87696e+06	5.87696e+06
GGCT	6.29133e+06		5.86183e+06	5.86183e+06
LIMS1	4.80995e+06		5.84063e+06
CBFB	4.14306e+06		5.7739e+06	5.7739e+06
WDR77			5.71544e+06
RPS27L	4.23793e+06		5.66283e+06
HM13	4.84891e+06		5607819
WDCP		5.53955e+06
PSMB6	4.34892e+06		5.50817e+06	5.50817e+06
LBR			5.4694e+06	5.4694e+06
HMGN1	5.81929e+06		5.23867e+06	5.23867e+06
VPS29	13750262		5.18002e+06
LTA4H	1.64996e+07		5.17169e+06	5.17169e+06
OXA1L	5.70505e+06	5.11938e+06
GSR	4.09413e+06		5.09838e+06	5.09838e+06
THEM6	3.1729e+06		5.08804e+06	5.08804e+06
PAXIP1	13935345	5.06279e+06
C11orf98	2.82881e+06		4.96562e+06	4.96562e+06
PLP2	8.36178e+06		4.9601e+06	4.9601e+06
SPTBN5			4.90977e+06	4.90977e+06
ITGB1	5.12699e+06		4.88313e+06
PTGES3	4.98373e+06		4.73478e+06	4.73478e+06
HSD17B2	6.5667e+06		4.71212e+06	4.71212e+06
SCCPDH	9.93914e+06	4.68758e+06
RCC2			4.61777e+06	4.61777e+06
ERGIC1	6.42618e+06	4.59848e+06
AZGP1	9.92218e+06	4.59695e+06
SDHA	7.10761e+06		4.5873e+06	4.5873e+06
GLUL	4.40472e+06		4.4132e+06	4.4132e+06
RAB12	2.78199e+06	4.28588e+06
ARL6IP5	4.23009e+06	4.25876e+06
ATP5F1D	7.66714e+06		4.23756e+06	4.23756e+06
SCAF1	4.77561e+06	3.96599e+06
TAB3			3.887e+06	3.887e+06
ALDH7A1	1.42278e+06		3.8862e+06	3.8862e+06
VAMP3	5.28229e+06		3.87266e+06
VPS11	4.78616e+06		3.85355e+06
ZMIZ2	5.46537e+06	3.78864e+06
YIF1B	3.09907e+06		3.77421e+06	3.77421e+06
ADO	4.71936e+06	3.765e+06
EMC7	4.17257e+06		3.71826e+06	3.71826e+06
SLC3A2	4.14011e+06		3.71588e+06	3.71588e+06
USP4	2.67746e+06		3.69397e+06	3.69397e+06
MECOM	1.26634e+06		3.63731e+06	3.63731e+06
GFPT2	3.69488e+06		3.47117e+06	3.47117e+06
RHOC	6.06103e+06	3.41349e+06
FAM98B	2.07228e+06		3.28843e+06
TAF5		3.26365e+06
ATP5PB	4.86162e+06		3.11633e+06	3.11633e+06
LMAN2	6.80801e+06		3.10542e+06	3.10542e+06
NDUFS8	2.33769e+06		3.10252e+06
GNB1L			3.04671e+06	3.04671e+06
CDK9		3.01929e+06
AGO1	1.1527e+06		3.00132e+06	3.00132e+06
PRNP	5.90642e+06		2.9695e+06	2.9695e+06
GNS	9.16429e+06	2.88541e+06
TMED4	2.98639e+06		2.88029e+06	2.88029e+06
SRCAP	5.2831e+06	2.56447e+06
DROSHA	1.63254e+06		2.44846e+06	2.44846e+06
GNB2	5.21397e+06	2.39326e+06
NDUFS3	2.67604e+06		1.9638e+06
APEH		1.90028e+06
PFAS	8.07391e+06		1.70834e+06	1.70834e+06
PALLD		1.67787e+06
TRIM23	1.87874e+06	1.51934e+06
TANC2		1.43057e+06
STXBP4	2.27365e+06		1.17644e+06	1.17644e+06
ZFHX4		862297
HSPA8	1089065657	619286405
TUBB	488015836	420376283
LDHA	1166160327	257576557
CFL1	560369577	256211178
RAN	347213085	244699761
HNRNPA2B1	1328814514	244650598
HSP90AA1	288351076	185330056
S100A6	233693463	172453272
RPL7A	216761021	160346125
ZYX	338091062	158916869
RPL18	168605452	147383840
EEF2	388654939	130752604
ATP5F1B	193471379	115975563
HSP90B1	336760031	109316503
AR-bait	331346374	102477092
JPT1	115777440	9.85316e+07
COTL1	116077742	9.03024e+07
SMAP2	565993381	8.80892e+07
PDIA6	124842105	8.44095e+07
PDCD6IP	133141136	7.71745e+07
ARID1A	7.71801e+07	7.66323e+07
KIF4A	8.8341e+07	7.48919e+07
CAPZB	138024123	7.36313e+07
HSPA1B	180812987	6.68916e+07
P4HA1	7.20388e+07	6.55811e+07
ILF3	491781327	6.54091e+07
ACTA1	174352718	6.04395e+07
ZNF503	285843138	5.67195e+07
HNRNPA3	200867335	4.61207e+07
SEC61A1	6.69365e+07	4.60881e+07
CHGB	4.99616e+07	4.5629e+07
GPATCH8	9.73928e+07	4.54375e+07
RBMX	144613487	4.52806e+07
G3BP2	6.45181e+07	4.49535e+07
PTBP1	210866972	4.45777e+07
HK1	6.48713e+07	4.33383e+07
HNRNPD	8.80641e+07	4.13044e+07
TARDBP	55214540	3.49711e+07
SNRNP70	4.70854e+07	3.38411e+07
ILF2	146865750	3.34864e+07
NFIX	112864231	3.28325e+07
TFG	346160108	3.25806e+07
UBE2L3	5.13386e+07	2.90316e+07
PDHB	71300483	2.89005e+07
FARSB	7.12023e+07	2.59109e+07
PGK1	449069505	2.48267e+07
LUC7L3	3.89736e+07	2.48248e+07
HNRNPL	7.00819e+07	2.43054e+07
ISG15	143400288	2.38922e+07
CLTA	2.29678e+07	2.18938e+07
HNRNPDL	9.336e+07	2.18173e+07
AARS1	2.56663e+07	2.17638e+07
KHDRBS1	7.29708e+07	2.17533e+07
LDHB	156070277	2.16262e+07
RRBP1	2.87775e+07	2.11443e+07
PIK3C3	3.17896e+07	2.03696e+07
STAU1	6.79758e+07	1.9862e+07
SNRPF	4.22433e+07	1.94195e+07
SAR1A	3.07761e+07	1.92737e+07
CCT7	57408474	1.86429e+07
SRSF9	4.36678e+07	1.84106e+07
IMPDH2	5.94409e+07	1.76694e+07
ARPC2	5.22303e+07	1.73242e+07
SEC61B	2.47161e+07	1.68738e+07
H1-4	2.66442e+07	1.68169e+07
ZMIZ1	1.68833e+07	1.66249e+07
PHGDH	5.33004e+07	1.64008e+07
HADHA	3.25654e+07	1.38186e+07
SRSF10	3.82436e+07	1.34248e+07
DAB2	1.88733e+07	1.27419e+07
ACTR2	4.10652e+07	1.26496e+07
POLR1C	1.70066e+07	1.13485e+07
LRRC40	39571849	11311142
FOXP1	5.39368e+07	1.12471e+07
ANXA5	101860298	11120142
ECI2	1.89057e+07	1.10363e+07
CBR1	7.66975e+07	9.50935e+06
PUM1	2.93632e+07	9.36559e+06
ACTN1	106320709	9.26326e+06
TXNL1	11598306	9.08364e+06
SERPINB6	3.99681e+07	9.03365e+06
CMYA5	1.10327e+07	8.9193e+06
ZFR	6.99704e+07	7.65837e+06
PGLS	9.56099e+06	7.59957e+06
EIF3L	1.65643e+07	7.30716e+06
MTPN	1.00487e+07	7.28187e+06
UBA1	3.33547e+07	7.27129e+06
CFAP20	1.57644e+07	7.00476e+06
PDCD6	1.80813e+07	6.83913e+06
MSN	393632523	6.34723e+06
RAB1B	1.39325e+07	6.34341e+06
PFN1	9.84676e+07	6.21121e+06
SBSN	1.11353e+07	5.83566e+06
EIF5A	3.75961e+07	5.67629e+06
PTPN11	1.76665e+07	5.54785e+06
PTGR1	1.64852e+06	5466717
CAPN2	2.32288e+07	4.97344e+06
PSMG1	8.19908e+06	4.79129e+06
YWHAB	1.50316e+07	4.44696e+06
EIF4H	9.20469e+06	4.4006e+06
BZW1	6.50192e+06	4.19817e+06
RAC1	4.97119e+06	4.05802e+06
FASTKD5	4.21595e+06	4.00618e+06
CSTA	8.90143e+06	3.86087e+06
COPZ1	6.63052e+06	3.85191e+06
SKP1	4.80566e+06	3.83124e+06
TPT1	1.76888e+07	3.77395e+06
PGD	2.8044e+07	3.48091e+06
GPATCH4	5.13424e+06	3.43018e+06
RBFOX2	6.65111e+06	3.42972e+06
ARPC1B	19994897	3.25542e+06
SLC12A2	6.10502e+06	3.21057e+06
RCC1	9.00133e+06	3.19281e+06
TALDO1	5.9663e+06	3.14554e+06
SRI	7.6011e+06	3.10281e+06
DKC1	1.37141e+07	3.09324e+06
RBMS2	8.66439e+06	3.07844e+06
ATP6V1B2	2.651e+07	3.0763e+06
PIP	2.9361e+06	2.93205e+06
DUSP3	3.95919e+06	2.906e+06
PNP	4.86317e+06	2.85949e+06
GNG12	4.12868e+06	2.78963e+06
OLA1	2.26135e+07	2.78328e+06
CBR3	1.3029e+07	2.7667e+06
CLOCK	3.3985e+06	2.62792e+06
AGPS	4.42328e+06	2.56143e+06
NFATC2	5.40799e+06	2.5558e+06
PABPC4	6.83299e+06	2.45278e+06
DENR	4.91508e+06	2.4423e+06
S100A13	3.22097e+06	2.41522e+06
SREK1	3.42591e+06	2.36006e+06
GPRC5A	3.33378e+06	2.30598e+06
CFL2	1.30735e+07	2.03583e+06
DMBT1	5.4053e+06	1.9499e+06
ACAT1	5.52593e+06	1.89108e+06
SSBP1	4.19829e+06	1.86969e+06
PTRH2	1.00243e+07	1.84033e+06
BCOR	1.18912e+06	1.74652e+06
HLA-A	800058	1.72747e+06
BAG2	7.90974e+06	1.72152e+06
ANP32E	2.19526e+06	1.59791e+06
NOLC1	1.64754e+06	1.35104e+06
CPNE1	8.227e+06	1.33166e+06
GDI2	1.66645e+07	1.32305e+06
LCN1	4.3228e+06	1.29876e+06
NME2	2.92206e+06	1.22577e+06
PDIA4	4.00339e+06	1.12755e+06
SOX21	939019	601541
GIGYF1	1.42841e+07
PGAM1	1.11447e+07
ZNF703	1.18809e+07
DLX1	1.44976e+06
CBLB	249341851
SS18	4.7126e+06
PRKACA	2.22661e+07
ABCE1	9.49033e+06
CIAPIN1	3.80074e+06
PTMA	4.73249e+06
GLOD4	4.11285e+06
SPICE1	3.61439e+06
ABHD10	1.34843e+07
APRT	1.33851e+07
BLVRB	9.46367e+06
BPIFA1	7.00898e+06
CRYZ	3.64299e+06
EMC1	4.30159e+06
GFUS	1.22195e+07
IGLC3	1.87342e+06
LACRT	5.29675e+06
MRPS2	1.5927e+06
PIGR	1.09363e+06
TIAL1	4.16357e+06
UQCRFS1	4.0356e+06
ZG16B	7.00095e+06

## Sheet: EDF3H
Source data for Supplementary Figure 3H
	-LOG(FDR)
Nuclear hormone receptor binding	8.15552
Nuclear receptor transcription coactivator activity	4.8729
Androgen receptor binding	2.46852
Steroid hormone receptor binding	2.4437
Thyroid hormone receptor binding	1.6925
	-LOG(FDR)
Organic cyclic compound binding	6.12494
Structural constituent of nuclear pore	4.09854
mRNA binding	3.02228
Binding	2.76955
Protein binding	2.76955

## Sheet: EDF3I
Source data for Supplementary Figure 3I
	Top						Middle						Bottom
	Count			Count			Count			Count			Count			Count
	72	WT BFDR-FC	Y22 BFDR-FC	144	WT All	Y22 All	125	WT BFDR-FC	BioGrid AR	71	Y22 BFDR-FC	Biogrid AR	158	WT All	Biogrid AR	97	Y22 All	Biogrid AR
		HSPA8	NPEPPS		ACACA	HSPA8	1	HSPA8	RANBP9		NPEPPS	RANBP9		ACACA	RANBP9	1	HSPA8	RANBP9
		JUNB	RBM14		CCT8	NPEPPS		JUNB	AKT1	1	RBM14	AKT1		CCT8	AKT1		NPEPPS	AKT1
		HOXB13	ARID1A		AHNAK2	RBM14		HOXB13	NCOA4	1	ARID1A	NCOA4		AHNAK2	NCOA4	1	RBM14	NCOA4
		ZYX	NFIX	1	HSPA8	HSPA5		ZYX	CALM1	1	NFIX	CALM1	1	HSPA8	CALM1	1	HSPA5	CALM1
	1	ARID1A	JMJD1C	1	RBM14	NCOR2	1	ARID1A	RAD9A	1	JMJD1C	RAD9A	1	RBM14	RAD9A	1	NCOR2	RAD9A
	1	NFIX	INTS13	1	HSPA5	HOXB13	1	NFIX	NCOA6		INTS13	NCOA6	1	HSPA5	NCOA6		HOXB13	NCOA6
		XAB2	PKP1		MAP1B	ZYX	1	XAB2	CTNNB1		PKP1	CTNNB1		MAP1B	CTNNB1		ZYX	CTNNB1
	1	ARID1B	BCL9L	1	NCOR2	ARID1A	1	ARID1B	DAXX	1	BCL9L	DAXX	1	NCOR2	DAXX	1	ARID1A	DAXX
		SYNRG	TFDP2		JUNB	NFIX		SYNRG	SP1		TFDP2	SP1		JUNB	SP1	1	NFIX	SP1
		MRE11	H4C1		EIF4G2	JMJD1C		MRE11	GSK3B	1	H4C1	GSK3B		EIF4G2	GSK3B	1	JMJD1C	GSK3B
		FOSL1	LMNA	1	HOXB13	INTS13		FOSL1	GSN		LMNA	GSN		HOXB13	GSN		INTS13	GSN
		NCOA3	ARID1B	1	ZYX	PKP1	1	NCOA3	SELENBP1	1	ARID1B	SELENBP1		ZYX	SELENBP1		PKP1	SELENBP1
		ZNF281	CHN2		UPF1	BCL9L	1	ZNF281	HSPA1A		CHN2	HSPA1A		UPF1	HSPA1A	1	BCL9L	HSPA1A
	1	NCOA2	SFPQ	1	ARID1A	TFDP2	1	NCOA2	HSP90AA1	1	SFPQ	HSP90AA1	1	ARID1A	HSP90AA1		TFDP2	HSP90AA1
		TCF20	NONO	1	NFIX	H4C1	1	TCF20	UXT	1	NONO	UXT	1	NFIX	UXT		H4C1	UXT
		FOXA1	PKM		CTTN	LMNA	1	FOXA1	CAV1	1	PKM	CAV1		CTTN	CAV1		LMNA	CAV1
		GSPT1	NCOA2	1	INTS13	ARID1B		GSPT1	JUN	1	NCOA2	JUN		INTS13	JUN	1	ARID1B	JUN
		PXN	PRR12	1	PKP1	CHN2		PXN	PRKDC	1	PRR12	PRKDC		PKP1	PRKDC		CHN2	PRKDC
		HELLS	CAD		XAB2	SFPQ		HELLS	BAG1		CAD	BAG1	1	XAB2	BAG1	1	SFPQ	BAG1
		JUN	ACTG1		PAK2	NONO	1	JUN	CREBBP		ACTG1	CREBBP		PAK2	CREBBP	1	NONO	CREBBP
	1	HSPA6	NUP214		YAP1	PKM		HSPA6	CCND1		NUP214	CCND1	1	YAP1	CCND1	1	PKM	CCND1
		TCF12	CLINT1		UPF2	HSP90AA1		TCF12	FOXA1		CLINT1	FOXA1		UPF2	FOXA1	1	HSP90AA1	FOXA1
		EDC3	UBAP2L	1	ARID1B	HSPA1B		EDC3	RNF14	1	UBAP2L	RNF14	1	ARID1B	RNF14		HSPA1B	RNF14
		ARHGAP29	S100A6		SYNRG	NCOA2		ARHGAP29	NCOR1		S100A6	NCOR1		SYNRG	NCOR1	1	NCOA2	NCOR1
		MED23	LDHA		MELK	PRR12		MED23	DCC	1	LDHA	DCC		MELK	DCC	1	PRR12	DCC
		BRCC3	HSPA6		MRE11	CAD		BRCC3	NCOR2		HSPA6	NCOR2		MRE11	NCOR2		CAD	NCOR2
		SMARCA4	BCL9		CRYBG1	ACTG1	1	SMARCA4	SRC	1	BCL9	SRC		CRYBG1	SRC		ACTG1	SRC
		TNK1	AGFG1		FOSL1	NUP214		TNK1	PTEN		AGFG1	PTEN		FOSL1	PTEN		NUP214	PTEN
		AHDC1	ZNF503		NCOA3	VDAC2	1	AHDC1	RB1		ZNF503	RB1	1	NCOA3	RB1		VDAC2	RB1
		TRIM33	PRDX1		DPYSL2	CLINT1	1	TRIM33	BRCA1		PRDX1	BRCA1		DPYSL2	BRCA1		CLINT1	BRCA1
		SPATA2	HSPB1		ZNF281	UBAP2L		SPATA2	ZMIZ1	1	HSPB1	ZMIZ1	1	ZNF281	ZMIZ1	1	UBAP2L	ZMIZ1
		ONECUT3	ACTBL2	1	PKM	NCOR1		ONECUT3	SMAD3		ACTBL2	SMAD3	1	PKM	SMAD3	1	NCOR1	SMAD3
		CC2D1A	TMEM263		ASCC3	HNRNPK		CC2D1A	MAPK1		TMEM263	MAPK1		ASCC3	MAPK1		HNRNPK	MAPK1
	1	ZNF609	NUP153	1	HSPA1B	S100A6	1	ZNF609	EGFR		NUP153	EGFR		HSPA1B	EGFR		S100A6	EGFR
		SMARCC2	ZNF609	1	NCOA2	LDHA	1	SMARCC2	GSK3A	1	ZNF609	GSK3A	1	NCOA2	GSK3A		LDHA	GSK3A
	1	TNRC6A	TNRC6A		TCF20	JPT1		TNRC6A	KAT7		TNRC6A	KAT7	1	TCF20	KAT7		JPT1	KAT7
		LPP	HNRNPA2B1	1	PRR12	HSPA6		LPP	NR2C1		HNRNPA2B1	NR2C1	1	PRR12	NR2C1		HSPA6	NR2C1
		ARID5B	PRRC2C		FOXA1	BCL9	1	ARID5B	TDG		PRRC2C	TDG	1	FOXA1	TDG	1	BCL9	TDG
		IARS2	EEF2		GSPT1	AGFG1		IARS2	EFCAB6	1	EEF2	EFCAB6		GSPT1	EFCAB6		AGFG1	EFCAB6
	1	LYZ	TUFM		PXN	ZNF503		LYZ	KAT5		TUFM	KAT5		PXN	KAT5		ZNF503	KAT5
		IFI16	LYZ		PSMD2	PRDX1	1	IFI16	HDAC1		LYZ	HDAC1	1	PSMD2	HDAC1		PRDX1	HDAC1
		WWTR1	RPN2		HELLS	SYNJ2		WWTR1	CDK9		RPN2	CDK9		HELLS	CDK9		SYNJ2	CDK9
		TRIM24	KHSRP		PDLIM1	UBA52	1	TRIM24	NSD1		KHSRP	NSD1		PDLIM1	NSD1		UBA52	NSD1
		RPAP3	TFG		JUN	TUBB		RPAP3	YWHAQ		TFG	YWHAQ	1	JUN	YWHAQ		TUBB	YWHAQ
		LYPLA2	ZMIZ2		CRYBG3	HSPB1		LYPLA2	PRMT1	1	ZMIZ2	PRMT1		CRYBG3	PRMT1	1	HSPB1	PRMT1
		MED15	UTP20	1	JPT1	ACTBL2	1	MED15	NR0B2		UTP20	NR0B2		JPT1	NR0B2		ACTBL2	NR0B2
		CYLD	SEC16A	1	HSPA6	ATP5F1A		CYLD	POU2F1		SEC16A	POU2F1		HSPA6	POU2F1		ATP5F1A	POU2F1
		JUND	ZMIZ1		PLAA	TMEM263		JUND	POU2F2	1	ZMIZ1	POU2F2		PLAA	POU2F2		TMEM263	POU2F2
		CEP97	DSP		TCF12	NUP153		CEP97	DAP3	1	DSP	DAP3		TCF12	DAP3		NUP153	DAP3
	1	ZMIZ2	GAPDH	1	AGFG1	MTHFD1	1	ZMIZ2	CEBPA	1	GAPDH	CEBPA		AGFG1	CEBPA		MTHFD1	CEBPA
		NRIP1	AGO2		EDC3	ZNF609		NRIP1	CEBPB		AGO2	CEBPB		EDC3	CEBPB	1	ZNF609	CEBPB
		CRIP2	SMAP2		TNRC6B	RAN		CRIP2	SVIL		SMAP2	SVIL		TNRC6B	SVIL	1	RAN	SVIL
	1	ZMIZ1	MAGED1		ARHGAP29	TNRC6A	1	ZMIZ1	AES	1	MAGED1	AES		ARHGAP29	AES		TNRC6A	AES
		XRN1	NUP98		PDLIM5	PABPC1		XRN1	FHL2		NUP98	FHL2		PDLIM5	FHL2	1	PABPC1	FHL2
		ABRAXAS2	SEC24C		MED23	HNRNPA2B1		ABRAXAS2	CDC37		SEC24C	CDC37		MED23	CDC37		HNRNPA2B1	CDC37
		SYTL4	SYCP1		BRCC3	PRRC2C		SYTL4	PIAS2		SYCP1	PIAS2		BRCC3	PIAS2		PRRC2C	PIAS2
		MYO6	HSPD1	1	SYNJ2	STIM1	1	MYO6	NCOA1	1	HSPD1	NCOA1		SYNJ2	NCOA1		STIM1	NCOA1
		FOSL2	ANKRD17		GSPT2	EEF2	1	FOSL2	TMF1		ANKRD17	TMF1		GSPT2	TMF1	1	EEF2	TMF1
		TRERF1	RAE1		SYAP1	TUFM	1	TRERF1	CCNE1		RAE1	CCNE1		SYAP1	CCNE1		TUFM	CCNE1
		OCRL	GRIPAP1		SMARCA4	ATXN2L		OCRL	UBE2I		GRIPAP1	UBE2I	1	SMARCA4	UBE2I		ATXN2L	UBE2I
		LASP1	PYGO2		JPT2	LYZ		LASP1	SMAD4	1	PYGO2	SMAD4		JPT2	SMAD4		LYZ	SMAD4
		KLF5	FBRS		TNK1	CSNK2A1	1	KLF5	NR2C2	1	FBRS	NR2C2		TNK1	NR2C2	1	CSNK2A1	NR2C2
		SIX4	TECR		AHDC1	HELZ		SIX4	RNF4		TECR	RNF4	1	AHDC1	RNF4		HELZ	RNF4
		SOX9	PGK1		TRIP11	RPN2		SOX9	PATZ1	1	PGK1	PATZ1		TRIP11	PATZ1		RPN2	PATZ1
		BCOR	ATN1		ZC3HAV1	CFL1	1	BCOR	PA2G4	1	ATN1	PA2G4		ZC3HAV1	PA2G4		CFL1	PA2G4
		PPP1R2	YWHAZ		TRIM33	DDX5		PPP1R2	RCHY1	1	YWHAZ	RCHY1	1	TRIM33	RCHY1		DDX5	RCHY1
		AQR	UBE2M		SPATA2	KHSRP		AQR	PRPF6		UBE2M	PRPF6		SPATA2	PRPF6		KHSRP	PRPF6
		C15orf39	AHR		ONECUT3	TFG		C15orf39	TRIM24	1	AHR	TRIM24		ONECUT3	TRIM24		TFG	TRIM24
		APBB1	HSP90B1		SHTN1	ACTN1		APBB1	MED1		HSP90B1	MED1		SHTN1	MED1		ACTN1	MED1
		ETV4	HIPK2		CC2D1A	ZMIZ2		ETV4	GAPDH		HIPK2	GAPDH		CC2D1A	GAPDH	1	ZMIZ2	GAPDH
		DLD	PCMT1		WIPI2	UTP20		DLD	CDC25B		PCMT1	CDC25B		WIPI2	CDC25B		UTP20	CDC25B
		DOCK6	PPME1	1	TMEM263	SEC16A		DOCK6	TRIM68		PPME1	TRIM68		TMEM263	TRIM68		SEC16A	TRIM68
		SMARCE1	HPGD		IGBP1	SLC25A3	1	SMARCE1	MAGEA11		HPGD	MAGEA11		IGBP1	MAGEA11		SLC25A3	MAGEA11
		PMS1	S100A9		ARHGAP35	ZMIZ1		PMS1	HSPB2		S100A9	HSPB2		ARHGAP35	HSPB2	1	ZMIZ1	HSPB2
		PATL1	UBAP2	1	ZNF609	VDAC1		PATL1	WHSC1		UBAP2	WHSC1	1	ZNF609	WHSC1	1	VDAC1	WHSC1
		NFATC2	DAD1		SMARCC2	DSP		NFATC2	PHB		DAD1	PHB	1	SMARCC2	PHB	1	DSP	PHB
	1	YWHAZ	TUBB4B		MAVS	GAPDH	1	YWHAZ	SIRT1		TUBB4B	SIRT1		MAVS	SIRT1	1	GAPDH	SIRT1
		MADD	PSPC1	1	TNRC6A	PCBP1		MADD	HDAC7	1	PSPC1	HDAC7		TNRC6A	HDAC7		PCBP1	HDAC7
		BCAS3	MTCH2		HAUS6	AGO2		BCAS3	ZNF318		MTCH2	ZNF318		HAUS6	ZNF318		AGO2	ZNF318
	1	AHR	PIK3C3		EIF4B	ACTA1	1	AHR	NR0B1		PIK3C3	NR0B1		EIF4B	NR0B1		ACTA1	NR0B1
		NAB1	FAM168A		SRP54	SMAP2		NAB1	RAD54L2		FAM168A	RAD54L2		SRP54	RAD54L2		SMAP2	RAD54L2
		TTC28	ARF1		AAK1	MAGED1		TTC28	ZMIZ2		ARF1	ZMIZ2		AAK1	ZMIZ2	1	MAGED1	ZMIZ2
		LIMD1	H1-0		LPP	KIAA1217		LIMD1	SMARCE1		H1-0	SMARCE1		LPP	SMARCE1	1	KIAA1217	SMARCE1
		MAMLD1	ACOT9		ZFYVE1	ARF4		MAMLD1	MDM2		ACOT9	MDM2		ZFYVE1	MDM2		ARF4	MDM2
		AIP	PPIA		PKN1	NUP98		AIP	SREBF1		PPIA	SREBF1		PKN1	SREBF1		NUP98	SREBF1
		ELP1	YTHDF1		ARID5B	SEC24C		ELP1	RUVBL1		YTHDF1	RUVBL1	1	ARID5B	RUVBL1		SEC24C	RUVBL1
		HOXA13	TMED10		ZNF148	SHMT2		HOXA13	KDM5B		TMED10	KDM5B	1	ZNF148	KDM5B		SHMT2	KDM5B
		BCAR3	PHB		IARS2	CAPZB		BCAR3	PIAS4	1	PHB	PIAS4		IARS2	PIAS4	1	CAPZB	PIAS4
		APOBEC3C	SEC24B	1	LYZ	SIX4		APOBEC3C	SFPQ		SEC24B	SFPQ		LYZ	SFPQ		SIX4	SFPQ
		DVL3	XIAP		IFI16	SYCP1		DVL3	ERG		XIAP	ERG	1	IFI16	ERG		SYCP1	ERG
	1	HPGD	NUP62		TWF2	ATP5F1B		HPGD	KDM4A		NUP62	KDM4A		TWF2	KDM4A		ATP5F1B	KDM4A
		NEK9	LRRC40		WWTR1	BCOR	1	NEK9	KDM4D		LRRC40	KDM4D		WWTR1	KDM4D	1	BCOR	KDM4D
		MGA	BIRC2		PPP6R3	HSPD1	1	MGA	RREB1		BIRC2	RREB1		PPP6R3	RREB1	1	HSPD1	RREB1
		SLC16A3	CKAP4		TRIM24	ANKRD17		SLC16A3	SRCAP		CKAP4	SRCAP	1	TRIM24	SRCAP		ANKRD17	SRCAP
		ABCF3	SCAMP3		RPAP3	RAE1		ABCF3	TADA3		SCAMP3	TADA3		RPAP3	TADA3		RAE1	TADA3
	1	MTCH2	ALDOA		LYPLA2	GRIPAP1		MTCH2	HDAC4		ALDOA	HDAC4		LYPLA2	HDAC4		GRIPAP1	HDAC4
		BPIFA1	PDIA3		MED15	RBM33		BPIFA1	RNF6		PDIA3	RNF6	1	MED15	RNF6	1	RBM33	RNF6
	1	PIK3C3	LCN1		CYLD	SIDT1		PIK3C3	NELFCD		LCN1	NELFCD		CYLD	NELFCD		SIDT1	NELFCD
		DERL1	YTHDF3		JUND	RPN1		DERL1	RNF40		YTHDF3	RNF40		JUND	RNF40		RPN1	RNF40
		CNOT8	S100A8		CEP97	PYGO2		CNOT8	RNF20		S100A8	RNF20		CEP97	RNF20	1	PYGO2	RNF20
		SMARCC1	NCOA6	1	ZMIZ2	RPS3	1	SMARCC1	CDK7	1	NCOA6	CDK7	1	ZMIZ2	CDK7	1	RPS3	CDK7
		PPP6R1	HSD17B10		NRIP1	FBRS		PPP6R1	STUB1		HSD17B10	STUB1		NRIP1	STUB1	1	FBRS	STUB1
		NCOA1	JUP		CRIP2	TECR	1	NCOA1	GTF2H3	1	JUP	GTF2H3		CRIP2	GTF2H3		TECR	GTF2H3
	1	TMED10	ANK3	1	ZMIZ1	PGK1		TMED10	CHD8		ANK3	CHD8	1	ZMIZ1	CHD8	1	PGK1	CHD8
		ABLIM3	WDR5		XRN1	SERPINB5		ABLIM3	SETD7	1	WDR5	SETD7		XRN1	SETD7		SERPINB5	SETD7
		PPP1R13L	DDX17	1	GAPDH	ATN1		PPP1R13L	NCOA3		DDX17	NCOA3	1	GAPDH	NCOA3	1	ATN1	NCOA3
		SLAIN2	RER1		PIK3C2A	NFATC2		SLAIN2	E2F1		RER1	E2F1		PIK3C2A	E2F1		NFATC2	E2F1
		NFIA	GIGYF1		ABRAXAS2	YWHAZ	1	NFIA	E2F4		GIGYF1	E2F4		ABRAXAS2	E2F4	1	YWHAZ	E2F4
		ZNF217	HYOU1		SYTL4	UBE2M	1	ZNF217	PSMC3		HYOU1	PSMC3		SYTL4	PSMC3		UBE2M	PSMC3
		VCPIP1	ANXA5		AMPD2	AHR		VCPIP1	LATS2		ANXA5	LATS2		AMPD2	LATS2	1	AHR	LATS2
		CHMP4B	ANXA7		BCAR1	HSP90B1		CHMP4B	ZNF451		ANXA7	ZNF451		BCAR1	ZNF451		HSP90B1	ZNF451
		PEX5	ENO1	1	AGO2	RPLP1		PEX5	COPS2	1	ENO1	COPS2		AGO2	COPS2		RPLP1	COPS2
	1	XIAP	TIPRL		ASAP1	STAU1		XIAP	USP10		TIPRL	USP10		ASAP1	USP10		STAU1	USP10
		HLCS	CYB5R3		MYO6	HIPK2		HLCS	TNK2		CYB5R3	TNK2	1	MYO6	TNK2		HIPK2	TNK2
	1	BIRC2	LGALS1	1	MAGED1	RPLP2		BIRC2	DDB2		LGALS1	DDB2	1	MAGED1	DDB2		RPLP2	DDB2
		TTC9C	UBE2N		FOSL2	RPLP0		TTC9C	PAX6		UBE2N	PAX6	1	FOSL2	PAX6		RPLP0	PAX6
		KLF10	FHL2		TRERF1	RPS4X		KLF10	WDR77	1	FHL2	WDR77	1	TRERF1	WDR77	1	RPS4X	WDR77
		SCGB2A1	PHB2		OCRL	PCMT1		SCGB2A1	DCAF6	1	PHB2	DCAF6		OCRL	DCAF6		PCMT1	DCAF6
		TCF7L2	ATXN2		LASP1	NSF	1	TCF7L2	ZBTB32		ATXN2	ZBTB32		LASP1	ZBTB32		NSF	ZBTB32
		THADA	GSE1		KLF5	DDOST		THADA	TAB2	1	GSE1	TAB2	1	KLF5	TAB2		DDOST	TAB2
	1	SCAMP3	MSN	1	SIX4	CCT7		SCAMP3	PARK7		MSN	PARK7		SIX4	PARK7		CCT7	PARK7
	1	ALDOA	TAF4		SOX9	PPME1		ALDOA	STAT3		TAF4	STAT3		SOX9	STAT3		PPME1	STAT3
		UNC45A	DNAJB2	1	BCOR	BLVRA		UNC45A	UBE3A		DNAJB2	UBE3A	1	BCOR	UBE3A		BLVRA	UBE3A
	1	LCN1	RPL15	1	ANKRD17	HPGD		LCN1	PAK6		RPL15	PAK6		ANKRD17	PAK6		HPGD	PAK6
		SMARCB1	LDHB		PPP1R2	HNRNPA3	1	SMARCB1	KDM3A		LDHB	KDM3A		PPP1R2	KDM3A		HNRNPA3	KDM3A
		ACOT1	EIF5A		CMTR1	S100A9		ACOT1	APPL1		EIF5A	APPL1		CMTR1	APPL1		S100A9	APPL1
		ATG2B	SON		ARNT	UBAP2		ATG2B	JMJD1C		SON	JMJD1C		ARNT	JMJD1C		UBAP2	JMJD1C
		BUB1B	SLC25A11		AQR	RPL22		BUB1B	SMAD1		SLC25A11	SMAD1		AQR	SMAD1		RPL22	SMAD1
		PHAF1	CBR1		C15orf39	MAML1		PHAF1	VHL		CBR1	VHL		C15orf39	VHL	1	MAML1	VHL
		RIMKLA	PRDX2		ESYT2	DAD1		RIMKLA	CUL2		PRDX2	CUL2		ESYT2	CUL2		DAD1	CUL2
		SNX7	SUCLG1		APBB1	TUBB4B		SNX7	PTGES3		SUCLG1	PTGES3		APBB1	PTGES3		TUBB4B	PTGES3
		MINK1	CSTB		ETV4	SSR4		MINK1	SPOP		CSTB	SPOP		ETV4	SPOP		SSR4	SPOP
		TSC22D4	FLOT1	1	FBRS	PSPC1		TSC22D4	SKP2	1	FLOT1	SKP2	1	FBRS	SKP2	1	PSPC1	SKP2
		TACC2	MT-ATP6		DLD	PCNA		TACC2	REL		MT-ATP6	REL		DLD	REL		PCNA	REL
		PFDN6	PRRC2B		PDAP1	MTCH2		PFDN6	WIPI1	1	PRRC2B	WIPI1		PDAP1	WIPI1		MTCH2	WIPI1
		PALS1	IGF2BP2		DOCK6	BPIFA1		PALS1	KIF1A		IGF2BP2	KIF1A		DOCK6	KIF1A		BPIFA1	KIF1A
		ELP6	RUNX1		NUDT5	PIK3C3		ELP6	NDE1		RUNX1	NDE1		NUDT5	NDE1		PIK3C3	NDE1
	1	GIGYF1	SLC12A2		SMARCE1	STT3A		GIGYF1	VCP		SLC12A2	VCP	1	SMARCE1	VCP		STT3A	VCP
		CTU2	SEC61A1		MAML2	PUM1		CTU2	AATF		SEC61A1	AATF		MAML2	AATF		PUM1	AATF
		LACRT	PTBP1		PMS1	DERL1		LACRT	TSG101		PTBP1	TSG101		PMS1	TSG101		DERL1	TSG101
		SHC4	FAU		PATL1	FAM168A	1	SHC4	DAPK3		FAU	DAPK3		PATL1	DAPK3		FAM168A	DAPK3
		SIM2	FSCN1	1	NFATC2	ILF3		SIM2	EP300		FSCN1	EP300		NFATC2	EP300		ILF3	EP300
		CISD1	PICALM		AHCYL1	YTHDF2		CISD1	TTC5		PICALM	TTC5	1	AHCYL1	TTC5		YTHDF2	TTC5
		ZG16B	IMPDH2	1	YWHAZ	ARF1		ZG16B	KAT2B		IMPDH2	KAT2B	1	YWHAZ	KAT2B		ARF1	KAT2B
		ZC3H12C	SMAP1		MADD	RPL13		ZC3H12C	IFI16		SMAP1	IFI16		MADD	IFI16		RPL13	IFI16
		EIF3H	UBA1		BCAS3	RPS9		EIF3H	EZH2		UBA1	EZH2		BCAS3	EZH2	1	RPS9	EZH2
		SLC35B2	CEP350	1	AHR	H1-0		SLC35B2	SUZ12		CEP350	SUZ12	1	AHR	SUZ12		H1-0	SUZ12
		SBNO1	FNDC3B		NAB1	TARDBP		SBNO1	EED		FNDC3B	EED		NAB1	EED	1	TARDBP	EED
		USP54	S100A7		DDHD1	RAB6A	1	USP54	RNF2		S100A7	RNF2		DDHD1	RNF2		RAB6A	RNF2
		MB21D2	ACOT7		TTC28	ACOT9		MB21D2	BMI1		ACOT7	BMI1		TTC28	BMI1		ACOT9	BMI1
		TTK	BIN2		LIMD1	ILF2		TTK	RELA		BIN2	RELA		LIMD1	RELA	1	ILF2	RELA
		CORO7	YWHAB		STIP1	PPIA		CORO7	PRKG1		YWHAB	PRKG1		STIP1	PRKG1		PPIA	PRKG1
		NUDCD2	KRTCAP2		RNF214	YTHDF1		NUDCD2	MID1		KRTCAP2	MID1		RNF214	MID1		YTHDF1	MID1
		CDC37L1	NEBL		MAMLD1	TMED10		CDC37L1	PIAS1		NEBL	PIAS1		MAMLD1	PIAS1		TMED10	PIAS1
		DMBT1	IMMT		CALD1	CBLB		DMBT1	ELF3		IMMT	ELF3		CALD1	ELF3		CBLB	ELF3
	1	MT-ATP6	PARK7		AIP	HNRNPH1		MT-ATP6	IDE	1	PARK7	IDE		AIP	IDE	1	HNRNPH1	IDE
		MVP	GLUD1		TACC1	PHB		MVP	CDK6		GLUD1	CDK6		TACC1	CDK6	1	PHB	CDK6
		KMT2E	FBRSL1		ELP1	SEC24B		KMT2E	ETS1		FBRSL1	ETS1		ELP1	ETS1		SEC24B	ETS1
		N4BP1	ARF5		HOXA13	RTCB		N4BP1	KLK3		ARF5	KLK3		HOXA13	KLK3		RTCB	KLK3
		ASAP2	ATP5MF		BCAR3	ARPC2		ASAP2	USP7		ATP5MF	USP7		BCAR3	USP7		ARPC2	USP7
		FAM193A	MLEC		PIH1D1	PDIA6		FAM193A	PPP1CA		MLEC	PPP1CA		PIH1D1	PPP1CA		PDIA6	PPP1CA
		C1orf198	PFN1		APOBEC3C	XIAP		C1orf198	WDR20		PFN1	WDR20		APOBEC3C	WDR20		XIAP	WDR20
		BPIFB1	PGAM1		DVL3	NUP62		BPIFB1	USP26		PGAM1	USP26		DVL3	USP26		NUP62	USP26
	1	SMAP1	CALML5	1	HPGD	LRRC40		SMAP1	CACUL1		CALML5	CACUL1		HPGD	CACUL1		LRRC40	CACUL1
		VBP1	FH		NEK9	BIRC2		VBP1	USP14		FH	USP14	1	NEK9	USP14		BIRC2	USP14
	1	BIN2	TAB2		MGA	RPL18		BIN2	SUV39H2	1	TAB2	SUV39H2	1	MGA	SUV39H2		RPL18	SUV39H2
		CPSF3	CCAR1	1	S100A9	ACTR2		CPSF3	BRD4		CCAR1	BRD4		S100A9	BRD4	1	ACTR2	BRD4
		SLC35E1	RAB1B		SLC16A3	CKAP4		SLC35E1	TPD52		RAB1B	TPD52		SLC16A3	TPD52		CKAP4	TPD52
	1	NEBL	SYNE1	1	MAML1	PDCD6IP		NEBL	HNRNPL		SYNE1	HNRNPL	1	MAML1	HNRNPL		PDCD6IP	HNRNPL
		VPS37A	PIGR	1	DAD1	SCAMP3		VPS37A	KMT2D		PIGR	KMT2D		DAD1	KMT2D		SCAMP3	KMT2D
		DNAJC11	RERE		MAPRE1	CANX		DNAJC11	ASH2L	1	RERE	ASH2L		MAPRE1	ASH2L		CANX	ASH2L
		ELP4	SEC23A		FKBP4	DHCR7		ELP4	KMT2A		SEC23A	KMT2A	1	FKBP4	KMT2A		DHCR7	KMT2A
		PFDN1	TXNL1		ABCF3	ALDOA		PFDN1	FKBP5	1	TXNL1	FKBP5		ABCF3	FKBP5		ALDOA	FKBP5
		PTPN14	RB1		ATG2A	PDIA3		PTPN14	SH3YL1	1	RB1	SH3YL1		ATG2A	SH3YL1		PDIA3	SH3YL1
		ALMS1	H1-2	1	MTCH2	RPL35A		ALMS1	HIF1A		H1-2	HIF1A		MTCH2	HIF1A		RPL35A	HIF1A
		GRK2	SNRPF	1	BPIFA1	LCN1		GRK2	BECN1		SNRPF	BECN1		BPIFA1	BECN1		LCN1	BECN1
	1	CALML5	ZNF207	1	PIK3C3	HDAC2		CALML5	CCAR2		ZNF207	CCAR2		PIK3C3	CCAR2	1	HDAC2	CCAR2
	1	TAB2	MAL2		TRAPPC9	LMNB1	1	TAB2	MYLIP		MAL2	MYLIP		TRAPPC9	MYLIP	1	LMNB1	MYLIP
		KHDC4	MBOAT7		PKP2	YTHDF3		KHDC4	TXNDC5		MBOAT7	TXNDC5		PKP2	TXNDC5		YTHDF3	TXNDC5
		CRTC3	FABP5		ACTL6A	S100A8		CRTC3	CDKN2A		FABP5	CDKN2A	1	ACTL6A	CDKN2A		S100A8	CDKN2A
		BYSL	CHD7	1	DERL1	NCOA6		BYSL	GLI3	1	CHD7	GLI3		DERL1	GLI3	1	NCOA6	GLI3
		PFDN2	GET4		NUP88	HSD17B10		PFDN2	GLI2		GET4	GLI2		NUP88	GLI2		HSD17B10	GLI2
	1	PIGR	ZNF703		RHEB	JUP		PIGR	KIAA1429		ZNF703	KIAA1429		RHEB	KIAA1429	1	JUP	KIAA1429
	1	TXNL1	PAXIP1		CNOT8	HNRNPL	1	TXNL1	HSPA4	1	PAXIP1	HSPA4		CNOT8	HSPA4	1	HNRNPL	HSPA4
		SMG7	RAB21		KIF16B	ANK3		SMG7	OBSL1		RAB21	OBSL1		KIF16B	OBSL1		ANK3	OBSL1
		WASL	CIAPIN1		CBL	WDR5		WASL	HSPA5		CIAPIN1	HSPA5		CBL	HSPA5	1	WDR5	HSPA5
		NEK1	MIF		SMARCC1	DDX17		NEK1	SLIRP		MIF	SLIRP	1	SMARCC1	SLIRP		DDX17	SLIRP
		CRCP	PFN2		KANK1	RER1		CRCP	ZBTB7A		PFN2	ZBTB7A		KANK1	ZBTB7A		RER1	ZBTB7A
		HIVEP2	TUBB3		PPP6R1	RACK1		HIVEP2	MYSM1		TUBB3	MYSM1		PPP6R1	MYSM1		RACK1	MYSM1
	1	MBOAT7	DNAJB11		NCOA1	GIGYF1		MBOAT7	PGK1		DNAJB11	PGK1	1	NCOA1	PGK1		GIGYF1	PGK1
		BHLHE41	HAX1	1	YTHDF1	P4HB		BHLHE41	KIF15	1	HAX1	KIF15		YTHDF1	KIF15		P4HB	KIF15
		DPYSL4	MSMP	1	TMED10	RPL7A		DPYSL4	SIAH2		MSMP	SIAH2		TMED10	SIAH2		RPL7A	SIAH2
		TTC1	MSTO1	1	CBLB	HYOU1		TTC1	APPBP2		MSTO1	APPBP2		CBLB	APPBP2		HYOU1	APPBP2
		TTC4	HDAC10		CCNT1	ANXA5		TTC4	ZBTB16		HDAC10	ZBTB16	1	CCNT1	ZBTB16		ANXA5	ZBTB16
		CCZ1	TMX1		NRBF2	ANXA7		CCZ1	RNF41		TMX1	RNF41		NRBF2	RNF41		ANXA7	RNF41
	1	RRM2	STXBP4		ABLIM3	ENO1	1	RRM2	GNB2L1		STXBP4	GNB2L1		ABLIM3	GNB2L1	1	ENO1	GNB2L1
	1	ALDH1A3	TMCO1		BAG3	RPL11		ALDH1A3	FLNA		TMCO1	FLNA		BAG3	FLNA		RPL11	FLNA
		PIKFYVE	MBNL1		PPP1R13L	YWHAE		PIKFYVE	RAN		MBNL1	RAN		PPP1R13L	RAN		YWHAE	RAN
		NEDD1	ATP5MK		SLAIN2	DAB2		NEDD1	HNF4A		ATP5MK	HNF4A		SLAIN2	HNF4A		DAB2	HNF4A
		PIP	FHL1		NFIA	PAPSS2		PIP	IL6ST		FHL1	IL6ST	1	NFIA	IL6ST		PAPSS2	IL6ST
		SAV1	TMEM109		ZNF217	RPS13		SAV1	CCNH		TMEM109	CCNH	1	ZNF217	CCNH	1	RPS13	CCNH
		FRMD6	PPP2R2A		VCPIP1	LACRT		FRMD6	XRCC5	1	PPP2R2A	XRCC5		VCPIP1	XRCC5		LACRT	XRCC5
		KANK2	DCD		CHMP4B	TIPRL		KANK2	XRCC6		DCD	XRCC6		CHMP4B	XRCC6		TIPRL	XRCC6
	1	STXBP4	H2AZ2		COG1	PTPN1		STXBP4	NCOA2		H2AZ2	NCOA2		COG1	NCOA2		PTPN1	NCOA2
		SURF4	DSC1		PEX5	COTL1		SURF4	FOXO1		DSC1	FOXO1		PEX5	FOXO1		COTL1	FOXO1
		DVL2	TGM1	1	XIAP	EIF4H		DVL2	TP53		TGM1	TP53		XIAP	TP53		EIF4H	TP53
		NDUFS1	ISG15		HLCS	HNRNPD		NDUFS1	TGFB1I1		ISG15	TGFB1I1		HLCS	TGFB1I1		HNRNPD	TGFB1I1
		SMCR8	SLC35F2	1	BIRC2	SUB1		SMCR8	GRIP1		SLC35F2	GRIP1		BIRC2	GRIP1		SUB1	GRIP1
	1	DCD	SLC25A1		TTC9C	CYB5R3		DCD	PELP1		SLC25A1	PELP1		TTC9C	PELP1		CYB5R3	PELP1
		POLR2M	SS18		KLF10	KIF4A		POLR2M	SART3		SS18	SART3		KLF10	SART3	1	KIF4A	SART3
		PPDPF	ATP5PO		SCGB2A1	ZG16B		PPDPF	HDAC3		ATP5PO	HDAC3		SCGB2A1	HDAC3		ZG16B	HDAC3
		HACD3	DSG1		AP4E1	DECR1		HACD3	PSPC1		DSG1	PSPC1		AP4E1	PSPC1		DECR1	PSPC1
	1	SS18	GSTK1		TCF7L2	RPL14		SS18	NONO		GSTK1	NONO	1	TCF7L2	NONO		RPL14	NONO
		ARHGAP31	CRKL		POLR3A	LGALS1		ARHGAP31	COX5B		CRKL	COX5B		POLR3A	COX5B		LGALS1	COX5B
		PARP4	ANXA11		THADA	UBE2N		PARP4	RAF1		ANXA11	RAF1		THADA	RAF1		UBE2N	RAF1
		PFDN5	LMAN1	1	SCAMP3	FHL2		PFDN5	SRY		LMAN1	SRY		SCAMP3	SRY	1	FHL2	SRY
		IGLC3	JAGN1	1	ALDOA	PHB2		IGLC3	CALR		JAGN1	CALR		ALDOA	CALR	1	PHB2	CALR
		KIAA1191	GSDMD		UNC45A	ATXN2		KIAA1191	SPDEF		GSDMD	SPDEF		UNC45A	SPDEF		ATXN2	SPDEF
		JCAD	SYNGR2		SNAP29	GSE1		JCAD	ETV5		SYNGR2	ETV5		SNAP29	ETV5	1	GSE1	ETV5
	1	PTGES3	TGM2		NFIL3	MSN	1	PTGES3	PIAS3		TGM2	PIAS3		NFIL3	PIAS3		MSN	PIAS3
		ELP5	G3BP2		ARL2	RPL27		ELP5	HMGB1		G3BP2	HMGB1		ARL2	HMGB1		RPL27	HMGB1
		SEMG1	S100A11		ELOB	TAF4		SEMG1	HMGB2		S100A11	HMGB2		ELOB	HMGB2		TAF4	HMGB2
		ANKRD18B	PTGES3	1	LCN1	PYCR3		ANKRD18B	GTF2F1	1	PTGES3	GTF2F1		LCN1	GTF2F1		PYCR3	GTF2F1
		PHF21A	LCLAT1		PLEKHA2	DNAJB2	1	PHF21A	GTF2F2		LCLAT1	GTF2F2		PLEKHA2	GTF2F2		DNAJB2	GTF2F2
		SCFD2	RHOC		SMARCB1	HNRNPH3		SCFD2	TBP		RHOC	TBP	1	SMARCB1	TBP	1	HNRNPH3	TBP
		AMPD3	FARSB		ACOT1	RPL15		AMPD3	GTF2H1		FARSB	GTF2H1		ACOT1	GTF2H1		RPL15	GTF2H1
		CNOT3	CAPN2		ATG2B	LDHB		CNOT3	PMEPA1		CAPN2	PMEPA1		ATG2B	PMEPA1		LDHB	PMEPA1
		EGLN1	OLA1		NCK1	PSMA6		EGLN1	SMARCA4		OLA1	SMARCA4		NCK1	SMARCA4	1	PSMA6	SMARCA4
		TRIP10	TUBA1B		BUB1B	EIF5A		TRIP10	SMARCC1		TUBA1B	SMARCC1		BUB1B	SMARCC1		EIF5A	SMARCC1
		CADPS2	SERPINB8		DCP1A	SON		CADPS2	MDN1		SERPINB8	MDN1		DCP1A	MDN1		SON	MDN1
		THEM6	ACP1		PHAF1	RPS26		THEM6	NLRP10		ACP1	NLRP10		PHAF1	NLRP10		RPS26	NLRP10
		LIN54	HADHA		SLC2A1	SLC25A11	1	LIN54	SMARCA2		HADHA	SMARCA2		SLC2A1	SMARCA2		SLC25A11	SMARCA2
		DPF2	ALDOC		RIMKLA	CBR1	1	DPF2	MED24		ALDOC	MED24		RIMKLA	MED24		CBR1	MED24
		VPS39	S100A16		MICAL1	UBE2D2		VPS39	DENND5A		S100A16	DENND5A		MICAL1	DENND5A		UBE2D2	DENND5A
		NDUFAF7	NCEH1		SNX7	PRMT1		NDUFAF7	ZBTB1		NCEH1	ZBTB1		SNX7	ZBTB1	1	PRMT1	ZBTB1
		PKP4	NCCRP1		MINK1	P4HA1		PKP4	MED12L		NCCRP1	MED12L		MINK1	MED12L		P4HA1	MED12L
		SMARCD3	DGAT1		TSC22D4	GPS2		SMARCD3	SMARCD1		DGAT1	SMARCD1		TSC22D4	SMARCD1	1	GPS2	SMARCD1
		PRICKLE1	CSTA		TACC2	PRDX2		PRICKLE1	MLH3		CSTA	MLH3		TACC2	MLH3		PRDX2	MLH3
		SHROOM3	BICD1		EYA3	SUCLG1		SHROOM3	KIFAP3		BICD1	KIFAP3		EYA3	KIFAP3		SUCLG1	KIFAP3
		IPMK	PDHB		PFDN6	CSTB		IPMK	TGIF1		PDHB	TGIF1		PFDN6	TGIF1		CSTB	TGIF1
		LAMTOR1	CDSN		PALS1	RPL27A		LAMTOR1	GADD45GIP1		CDSN	GADD45GIP1		PALS1	GADD45GIP1	1	RPL27A	GADD45GIP1
		RICTOR	ZFR		NOSIP	DMBT1		RICTOR	REPS2		ZFR	REPS2		NOSIP	REPS2		DMBT1	REPS2
		CAV1	SSBP1		SLC16A1	FLOT1	1	CAV1	ERCC3		SSBP1	ERCC3		SLC16A1	ERCC3	1	FLOT1	ERCC3
		NDUFS3	SEC61B		USP47	MT-ATP6		NDUFS3	ERCC2		SEC61B	ERCC2		USP47	ERCC2		MT-ATP6	ERCC2
		MCM3AP	HNRNPAB		ELP6	PRRC2B		MCM3AP	GTF2H2		HNRNPAB	GTF2H2		ELP6	GTF2H2	1	PRRC2B	GTF2H2
		CEP192	RNH1		SMG9	IGF2BP2		CEP192	LCOR		RNH1	LCOR		SMG9	LCOR		IGF2BP2	LCOR
		TANC2	FOXP1	1	GIGYF1	ATP5F1C		TANC2	TAF1	1	FOXP1	TAF1		GIGYF1	TAF1		ATP5F1C	TAF1
		SKA3	PRPF4B		MRPS31	PHGDH		SKA3	ARID5A		PRPF4B	ARID5A		MRPS31	ARID5A	1	PHGDH	ARID5A
	1	MGST3	GLRX		CTU2	RUNX1		MGST3	TCF20		GLRX	TCF20		CTU2	TCF20		RUNX1	TCF20
		TANK	PLD3		WDR45	SLC12A2		TANK	FKBP4		PLD3	FKBP4		WDR45	FKBP4		SLC12A2	FKBP4
	1	GLUL	PSMB1	1	YWHAE	RPL19	1	GLUL	PPP5C	1	PSMB1	PPP5C		YWHAE	PPP5C		RPL19	PPP5C
		SYNJ1	PLP2		ENSA	SEC61A1		SYNJ1	DNAJC7		PLP2	DNAJC7		ENSA	DNAJC7		SEC61A1	DNAJC7
		GABPA	BMP2K	1	LACRT	PTBP1		GABPA	PPID		BMP2K	PPID		LACRT	PPID		PTBP1	PPID
		CCDC102A	ARL6IP4		SHC4	FAU		CCDC102A	TBL1XR1		ARL6IP4	TBL1XR1	1	SHC4	TBL1XR1		FAU	TBL1XR1
		ALDH7A1	SFN	1	EIF4H	FSCN1		ALDH7A1	SIN3A		SFN	SIN3A		EIF4H	SIN3A		FSCN1	SIN3A
		NUDCD3	GANAB		SIM2	PICALM		NUDCD3	SIN3B		GANAB	SIN3B		SIM2	SIN3B		PICALM	SIN3B
		KIF1C	SFXN1		CISD1	RPS25		KIF1C	ACTB		SFXN1	ACTB		CISD1	ACTB		RPS25	ACTB
		TM7SF2	GALK1		NRBP1	IMPDH2		TM7SF2	RBL1		GALK1	RBL1		NRBP1	RBL1		IMPDH2	RBL1
		TRIM9	CTSD	1	ZG16B	SMAP1		TRIM9	USP12		CTSD	USP12		ZG16B	USP12		SMAP1	USP12
		SPART	HNRNPDL		ANKS1A	UBA1		SPART	TCF7L2		HNRNPDL	TCF7L2		ANKS1A	TCF7L2		UBA1	TCF7L2
		MAP4K3	SLC3A2		ZC3H12C	CEP350		MAP4K3	HOTAIR		SLC3A2	HOTAIR		ZC3H12C	HOTAIR		CEP350	HOTAIR
		NME2	H1-10		MECOM	FNDC3B		NME2	AHR		H1-10	AHR		MECOM	AHR		FNDC3B	AHR
		FAM117B	TALDO1		EIF3H	RPS27		FAM117B	WDR48		TALDO1	WDR48		EIF3H	WDR48		RPS27	WDR48
		PDLIM4	MGST3		TAB1	HK1		PDLIM4	PRPF8		MGST3	PRPF8		TAB1	PRPF8		HK1	PRPF8
		GAB1	RBMS2		NME1	S100A7		GAB1	PPP2CA		RBMS2	PPP2CA		NME1	PPP2CA		S100A7	PPP2CA
	1	RBMS1	H1-4		SLC35B2	ACOT7		RBMS1	KDM1A		H1-4	KDM1A		SLC35B2	KDM1A		ACOT7	KDM1A
		ERRFI1	UBE2E1		ETS1	TBL2		ERRFI1	SMARCC2		UBE2E1	SMARCC2	1	ETS1	SMARCC2		TBL2	SMARCC2
		SMARCD1	BOLA2; BOLA2B		UEVLD	BIN2	1	SMARCD1	TLE3		BOLA2; BOLA2B	TLE3		UEVLD	TLE3		BIN2	TLE3
		LBR	COX17		SBNO1	VDAC3		LBR	GSE1		COX17	GSE1		SBNO1	GSE1		VDAC3	GSE1
		TBC1D8B	GLUL		USP54	RPL13A		TBC1D8B	ARID1A	1	GLUL	ARID1A	1	USP54	ARID1A		RPL13A	ARID1A
		PPP6R2	SUGT1		MB21D2	ABCE1		PPP6R2	ARID1B		SUGT1	ARID1B		MB21D2	ARID1B		ABCE1	ARID1B
		IRF2BP2	CPNE1		STAT2	YWHAB	1	IRF2BP2	BCOR		CPNE1	BCOR		STAT2	BCOR		YWHAB	BCOR
		INVS	MLF2	1	PSMA6	ARPC1B		INVS	SMARCB1	1	MLF2	SMARCB1	1	PSMA6	SMARCB1		ARPC1B	SMARCB1
		SARG	RDH11		RASA1	RPL10A		SARG	CHD7		RDH11	CHD7	1	RASA1	CHD7		RPL10A	CHD7
		LTF	FN1		KNL1	KRTCAP2		LTF	RCOR1	1	FN1	RCOR1		KNL1	RCOR1		KRTCAP2	RCOR1
		WDFY1	CBR3		TTK	NEBL		WDFY1	DPF1		CBR3	DPF1		TTK	DPF1		NEBL	DPF1
		APEH	ATXN7L3B		WDCP	DSTN		APEH	RAI1		ATXN7L3B	RAI1		WDCP	RAI1		DSTN	RAI1
		TAB3	CBFB		CORO7	IMMT		TAB3	TFAP2A		CBFB	TFAP2A		CORO7	TFAP2A		IMMT	TFAP2A
		SNF8	TUBB6		MISP	PARK7		SNF8	PPP2R2A		TUBB6	PPP2R2A		MISP	PPP2R2A	1	PARK7	PPP2R2A
		UBAP1	ACAT1		HSPA4	GLUD1		UBAP1	DPF2		ACAT1	DPF2	1	HSPA4	DPF2		GLUD1	DPF2
		LYRM7	HNRNPH2		AFTPH	UQCRC2		LYRM7	ARID3B		HNRNPH2	ARID3B		AFTPH	ARID3B		UQCRC2	ARID3B
		TMEM41B	LTA4H		NUDCD2	FBRSL1		TMEM41B	CNBP		LTA4H	CNBP		NUDCD2	CNBP		FBRSL1	CNBP
		WDR83	NDUFA13		CDC37L1	ARF5		WDR83	ARID5B		NDUFA13	ARID5B		CDC37L1	ARID5B		ARF5	ARID5B
		PPP1R15B	UBE2Z	1	DMBT1	ASL		PPP1R15B	NEFL		UBE2Z	NEFL		DMBT1	NEFL		ASL	NEFL
	1	PNP	RBMS1		USP15	ATP5MF		PNP	RPS21		RBMS1	RPS21		USP15	RPS21		ATP5MF	RPS21
		CAMSAP3	SFXN3	1	MT-ATP6	MLEC		CAMSAP3	SPATS2L		SFXN3	SPATS2L		MT-ATP6	SPATS2L		MLEC	SPATS2L
		KDM3A	PPIG		TBC1D23	RBMX	1	KDM3A	RCC2		PPIG	RCC2		TBC1D23	RCC2		RBMX	RCC2
		CCDC50	PA2G4		MVP	TPT1		CCDC50	DDX19A	1	PA2G4	DDX19A		MVP	DDX19A		TPT1	DDX19A
		TSTD2	GPATCH8		KMT2E	PFN1		TSTD2	KARS		GPATCH8	KARS		KMT2E	KARS		PFN1	KARS
		GLMN	BLMH		CDC42EP2	PSMG1		GLMN	Psme3		BLMH	Psme3		CDC42EP2	Psme3		PSMG1	Psme3
		GLCCI1	PSMF1	1	SLC12A2	PGAM1		GLCCI1	BRD2		PSMF1	BRD2		SLC12A2	BRD2		PGAM1	BRD2
		EI24	SERPINB6		IRF2BPL	CALML5		EI24	BRD3		SERPINB6	BRD3	1	IRF2BPL	BRD3		CALML5	BRD3
		MAPT	OTUB1		KIAA1671	FH		MAPT	KDM6A		OTUB1	KDM6A		KIAA1671	KDM6A		FH	KDM6A
		SPRY4	PNN		N4BP1	COPZ1		SPRY4	ASXL1	1	PNN	ASXL1		N4BP1	ASXL1		COPZ1	ASXL1
	1	CASP14	PTPN11		ASAP2	TAB2		CASP14	FOXG1	1	PTPN11	FOXG1		ASAP2	FOXG1	1	TAB2	FOXG1
		MED8	CARM1		FAM193A	CCAR1	1	MED8	FZR1		CARM1	FZR1		FAM193A	FZR1		CCAR1	FZR1
		NR3C2	POF1B		C1orf198	RAB1B		NR3C2	CDC27		POF1B	CDC27		C1orf198	CDC27		RAB1B	CDC27
		ZSWIM8	ATP5PB		BPIFB1	SYNE1		ZSWIM8	ABL1		ATP5PB	ABL1		BPIFB1	ABL1		SYNE1	ABL1
		IP6K1	FAM168B	1	SMAP1	PIGR		IP6K1	ABL2		FAM168B	ABL2		SMAP1	ABL2		PIGR	ABL2
		SPICE1	CAT	1	CEP350	ALDH3A2		SPICE1	BLK		CAT	BLK		CEP350	BLK		ALDH3A2	BLK
		CEP152	SRI	1	FNDC3B	RERE		CEP152	BLNK		SRI	BLNK		FNDC3B	BLNK	1	RERE	BLNK
		CAPN15	SERPINB3		TDP2	SEC23A		CAPN15	BTK		SERPINB3	BTK		TDP2	BTK		SEC23A	BTK
		MAPK8IP3	PSMB6		VBP1	TXNL1		MAPK8IP3	CRK		PSMB6	CRK		VBP1	CRK	1	TXNL1	CRK
		CLNS1A	SCCPDH	1	BIN2	RB1		CLNS1A	FES		SCCPDH	FES		BIN2	FES	1	RB1	FES
		ZWINT	ARG1		SIRT1	SLC38A2		ZWINT	FGR		ARG1	FGR	1	SIRT1	FGR		SLC38A2	FGR
	1	GDI2	PNP	1	VDAC3	ASPH		GDI2	GRAP2		PNP	GRAP2		VDAC3	GRAP2		ASPH	GRAP2
		TOMM34	CCHCR1		CPSF3	H1-2		TOMM34	GRB2		CCHCR1	GRB2		CPSF3	GRB2		H1-2	GRB2
		PPP1R13B	TGM3		INPPL1	SNRPF		PPP1R13B	GRB7		TGM3	GRB7	1	INPPL1	GRB7		SNRPF	GRB7
		YIF1A	PTMA	1	KRTCAP2	ZNF207		YIF1A	HCK		PTMA	HCK		KRTCAP2	HCK		ZNF207	HCK
		BUB1	SRRM2		SLC35E1	MAL2		BUB1	HSH2D		SRRM2	HSH2D		SLC35E1	HSH2D		MAL2	HSH2D
	1	TPI1	RBBP5	1	NEBL	SQOR		TPI1	INPPL1	1	RBBP5	INPPL1		NEBL	INPPL1		SQOR	INPPL1
	1	RBM14	CIZ1		NR3C1	ECI2	1	RBM14	LCK		CIZ1	LCK		NR3C1	LCK		ECI2	LCK
		NCOR2	SBSN		VPS37A	MBOAT7	1	NCOR2	LYN		SBSN	LYN		VPS37A	LYN		MBOAT7	LYN
	1	JMJD1C	MAIP1		EXOC7	FABP5	1	JMJD1C	MATK		MAIP1	MATK		EXOC7	MATK		FABP5	MATK
	1	INTS13	HMGN1		DNAJC11	BZW1		INTS13	PIK3R1		HMGN1	PIK3R1		DNAJC11	PIK3R1		BZW1	PIK3R1
	1	PKP1	ABHD10		ELP4	CHD7		PKP1	PIK3R2		ABHD10	PIK3R2		ELP4	PIK3R2	1	CHD7	PIK3R2
		YAP1	ACOT13		PFDN1	TTN	1	YAP1	PIK3R3		ACOT13	PIK3R3		PFDN1	PIK3R3		TTN	PIK3R3
		HSPA9	ACYP2		AKAP1	GET4	1	HSPA9	PLCG1		ACYP2	PLCG1		AKAP1	PLCG1		GET4	PLCG1
		HSPA1B	AGPS		PTPN14	ZNF703		HSPA1B	PLCG2		AGPS	PLCG2		PTPN14	PLCG2		ZNF703	PLCG2
	1	PRR12	APOB		TBC1D8	BAG2	1	PRR12	PTK6		APOB	PTK6		TBC1D8	PTK6		BAG2	PTK6
		FOXA2	APRT		PACS1	PAXIP1		FOXA2	PTPN11	1	APRT	PTPN11		PACS1	PTPN11	1	PAXIP1	PTPN11
		NCOR1	ARGLU1		CRTC2	RAB21	1	NCOR1	RASA1		ARGLU1	RASA1		CRTC2	RASA1		RAB21	RASA1
	1	BCL9	ATP5F1D		PIK3CA	DLX1	1	BCL9	SH2D1A		ATP5F1D	SH2D1A		PIK3CA	SH2D1A		DLX1	SH2D1A
		TNRC6B	ATP6V1B2		NAA30	LPXN		TNRC6B	SH2D1B		ATP6V1B2	SH2D1B		NAA30	SH2D1B		LPXN	SH2D1B
	1	ZNF503	ATXN1L		ALMS1	CIAPIN1		ZNF503	SH2D2A	1	ATXN1L	SH2D2A		ALMS1	SH2D2A		CIAPIN1	SH2D2A
		USP7	AZGP1		GRK2	MIF	1	USP7	SH2D3C		AZGP1	SH2D3C		GRK2	SH2D3C		MIF	SH2D3C
		ZNF148	BLVRB	1	PGAM1	CMYA5	1	ZNF148	SHB		BLVRB	SHB		PGAM1	SHB		CMYA5	SHB
		RAVER1	CALML3	1	CALML5	PFN2	1	RAVER1	SHC1		CALML3	SHC1		CALML5	SHC1		PFN2	SHC1
		ZNF384	CITED2	1	TAB2	RPL23A		ZNF384	SHC3		CITED2	SHC3	1	TAB2	SHC3		RPL23A	SHC3
		MIDEAS	CRYZ		KHDC4	TOMM22		MIDEAS	SHC4		CRYZ	SHC4		KHDC4	SHC4		TOMM22	SHC4
	1	UTP20	DERPC		CRTC3	TUBB3		UTP20	SHE		DERPC	SHE		CRTC3	SHE		TUBB3	SHE
		NFIB	DPY30		BYSL	ERGIC1	1	NFIB	SOCS3	1	DPY30	SOCS3		BYSL	SOCS3		ERGIC1	SOCS3
		EP300	DUSP3		PFDN2	DNAJB11	1	EP300	SOCS6		DUSP3	SOCS6		PFDN2	SOCS6		DNAJB11	SOCS6
		SF1	EMC1	1	PIGR	HAX1		SF1	STAP1		EMC1	STAP1		PIGR	STAP1	1	HAX1	STAP1
		RPRD2	EMC7	1	TXNL1	TUBA4A	1	RPRD2	SYK		EMC7	SYK	1	TXNL1	SYK		TUBA4A	SYK
		NFIC	FAM120C	1	SLC38A2	GNAI2	1	NFIC	TNS1		FAM120C	TNS1		SLC38A2	TNS1		GNAI2	TNS1
		ARNT	FN3KRP		SMG7	MSMP		ARNT	TNS4		FN3KRP	TNS4		SMG7	TNS4		MSMP	TNS4
		DCAF7	GFUS		NEDD8	KHDRBS1		DCAF7	VAV1		GFUS	VAV1		NEDD8	VAV1		KHDRBS1	VAV1
		RBM33	GGCT		WASL	RPL34	1	RBM33	VAV2		GGCT	VAV2		WASL	VAV2		RPL34	VAV2
		SIDT1	GSDMA		NEK1	RPS17		SIDT1	VAV3		GSDMA	VAV3		NEK1	VAV3		RPS17	VAV3
	1	FBRS	GSR		CRCP	PIP	1	FBRS	YES1		GSR	YES1		CRCP	YES1		PIP	YES1
		CUX1	HSD17B2		HIVEP2	MSTO1	1	CUX1	IL23R		HSD17B2	IL23R		HIVEP2	IL23R		MSTO1	IL23R
		MAML2	CASP14	1	MBOAT7	PDHA1		MAML2	TNFRSF1A		CASP14	TNFRSF1A		MBOAT7	TNFRSF1A		PDHA1	TNFRSF1A
		HNRNPUL1	DROSHA		BHLHE41	PSMD14		HNRNPUL1	HSP90AB1		DROSHA	HSP90AB1		BHLHE41	HSP90AB1	1	PSMD14	HSP90AB1
		AHCYL1	IVL		DPYSL4	HDAC10	1	AHCYL1	HSPA8		IVL	HSPA8		DPYSL4	HSPA8		HDAC10	HSPA8
	1	HIPK2	LGALS7; LGALS7B		TTC1	TMX1		HIPK2	MYH10		LGALS7; LGALS7B	MYH10		TTC1	MYH10		TMX1	MYH10
		CPSF7	MTPAP		TTC4	STXBP4	1	CPSF7	MYO6		MTPAP	MYO6		TTC4	MYO6		STXBP4	MYO6
		PIAS2	NSDHL		AGR2	TMCO1	1	PIAS2	MYH14		NSDHL	MYH14		AGR2	MYH14		TMCO1	MYH14
		MAML1	PFAS		CCZ1	MBNL1	1	MAML1	MYO5A		PFAS	MYO5A		CCZ1	MYO5A		MBNL1	MYO5A
		PKP2	PPIB		RRM2	SURF4		PKP2	SEC16A		PPIB	SEC16A	1	RRM2	SEC16A		SURF4	SEC16A
		PIAS1	PRSS3	1	CIAPIN1	POLR1C	1	PIAS1	CDC42BPG		PRSS3	CDC42BPG		CIAPIN1	CDC42BPG		POLR1C	CDC42BPG
		ACTL6A	RBFOX2		ALDH1A3	ATP5MK	1	ACTL6A	KRT18		RBFOX2	KRT18		ALDH1A3	KRT18		ATP5MK	KRT18
	1	FAM168A	RBPMS		SNAP47	FHL1		FAM168A	KRT8		RBPMS	KRT8		SNAP47	KRT8		FHL1	KRT8
		CREBBP	SCP2		PIKFYVE	TMEM109	1	CREBBP	JUP		SCP2	JUP		PIKFYVE	JUP		TMEM109	JUP
		RBM27	SERPINB12		NEDD1	PPP2R2A	1	RBM27	UBB		SERPINB12	UBB		NEDD1	UBB	1	PPP2R2A	UBB
		MEF2D	SMC2		PHKA1	LMNB2	1	MEF2D	CLTC		SMC2	CLTC		PHKA1	CLTC		LMNB2	CLTC
		CDKN2AIP	SRCAP	1	PIP	DCD		CDKN2AIP	TPM3	1	SRCAP	TPM3		PIP	TPM3		DCD	TPM3
		CCNT1	SRSF10		SAV1	H2AZ2	1	CCNT1	PSMD2		SRSF10	PSMD2		SAV1	PSMD2		H2AZ2	PSMD2
		AKAP8	TIAL1		FRMD6	VPS11		AKAP8	MYO1D		TIAL1	MYO1D		FRMD6	MYO1D		VPS11	MYO1D
		FOXK1	TIMM13		KANK2	POM121C	1	FOXK1	DSG2		TIMM13	DSG2		KANK2	DSG2		POM121C	DSG2
		RAI1	GDI2	1	STXBP4	CHGB	1	RAI1	PABPC1		GDI2	PABPC1		STXBP4	PABPC1		CHGB	PABPC1
		WIZ	TMED4	1	TMCO1	DSC1	1	WIZ	EEF2		TMED4	EEF2		TMCO1	EEF2		DSC1	EEF2
		BCL6	IDE	1	SURF4	TGM1	1	BCL6	PCM1	1	IDE	PCM1		SURF4	PCM1		TGM1	PCM1
		NFIL3	TPP1		DVL2	SAR1A		NFIL3	EIF4A1		TPP1	EIF4A1		DVL2	EIF4A1		SAR1A	EIF4A1
		CSNK2A2	VPS29		NDUFS1	RAC1		CSNK2A2	MCM7		VPS29	MCM7		NDUFS1	MCM7		RAC1	MCM7
	1	NCOA6	TPI1		SMCR8	ISG15	1	NCOA6	TPM4		TPI1	TPM4		SMCR8	TPM4		ISG15	TPM4
		TNRC18	H4C1		GTF2A1	SLC35F2	1	TNRC18	CDK1	1	H4C1	CDK1		GTF2A1	CDK1		SLC35F2	CDK1
		ZBTB33	VDAC2		DCD	PCF11	1	ZBTB33	MME		VDAC2	MME		DCD	MME	1	PCF11	MME
		BRD4	SYNJ2		VPS11	SLC25A1	1	BRD4	RAB11FIP1		SYNJ2	RAB11FIP1		VPS11	RAB11FIP1		SLC25A1	RAB11FIP1
		PAX9	HELZ		PPIP5K2	SS18		PAX9	TPM1		HELZ	TPM1		PPIP5K2	TPM1		SS18	TPM1
		EYA3	VDAC1		POLR2M	ATP5PO		EYA3	BRAT1	1	VDAC1	BRAT1		POLR2M	BRAT1		ATP5PO	BRAT1
		NOSIP	PCBP1		PPDPF	DSG1		NOSIP	MAGED1		PCBP1	MAGED1		PPDPF	MAGED1		DSG1	MAGED1
		SMARCD2	KIAA1217	1	SLC35F2	RPL26	1	SMARCD2	EPPK1	1	KIAA1217	EPPK1		SLC35F2	EPPK1		RPL26	EPPK1
		RXRA	SHMT2		HACD3	GSTK1		RXRA	PRDX4		SHMT2	PRDX4		HACD3	PRDX4		GSTK1	PRDX4
		YWHAE	RPN1		TMSB4X	SKP1		YWHAE	USP54		RPN1	USP54		TMSB4X	USP54		SKP1	USP54
		CPEB4	NSF	1	SS18	CRKL		CPEB4	HSPD1		NSF	HSPD1		SS18	HSPD1		CRKL	HSPD1
		TRPS1	DDOST		ARHGAP31	ANXA11	1	TRPS1	PSMC4		DDOST	PSMC4		ARHGAP31	PSMC4		ANXA11	PSMC4
		TLE3	SSR4	1	JAGN1	RPL36	1	TLE3	GCN1L1		SSR4	GCN1L1		JAGN1	GCN1L1		RPL36	GCN1L1
		MECOM	PCNA		PARP4	LMAN1		MECOM	SQSTM1		PCNA	SQSTM1		PARP4	SQSTM1		LMAN1	SQSTM1
	1	GSE1	STT3A		PFDN5	JAGN1	1	GSE1	PSMC1		STT3A	PSMC1		PFDN5	PSMC1		JAGN1	PSMC1
		KMT2C	HNRNPH1		ECH1	GSDMD		KMT2C	CCT6A	1	HNRNPH1	CCT6A		ECH1	CCT6A		GSDMD	CCT6A
		ETS1	RTCB	1	IGLC3	RRBP1	1	ETS1	CCDC51		RTCB	CCDC51		IGLC3	CCDC51		RRBP1	CCDC51
		GPS2	LMNB1		KIAA1191	SYNGR2	1	GPS2	XRN2	1	LMNB1	XRN2		KIAA1191	XRN2		SYNGR2	XRN2
	1	SUCLG1	PAPSS2		JCAD	IGLC3		SUCLG1	DDX3X		PAPSS2	DDX3X		JCAD	DDX3X		IGLC3	DDX3X
		KLF4	SUB1		EMSY	NUP58	1	KLF4	CAPZA1		SUB1	CAPZA1		EMSY	CAPZA1		NUP58	CAPZA1
		MED1	PSMA6	1	PTGES3	TGM2	1	MED1	MYO1C	1	PSMA6	MYO1C	1	PTGES3	MYO1C		TGM2	MYO1C
	1	PRRC2B	RPS25		ELP5	G3BP2	1	PRRC2B	SLC25A6		RPS25	SLC25A6		ELP5	SLC25A6		G3BP2	SLC25A6
	1	RUNX1	VDAC3		KIF13B	S100A11		RUNX1	HSPA9		VDAC3	HSPA9		KIF13B	HSPA9		S100A11	HSPA9
		IRF2BPL	SLC38A2		TXNRD1	PTGES3	1	IRF2BPL	FOLH1		SLC38A2	FOLH1	1	TXNRD1	FOLH1	1	PTGES3	FOLH1
		MORC4	SQOR		SEMG1	LCLAT1	1	MORC4	SLC25A5		SQOR	SLC25A5		SEMG1	SLC25A5		LCLAT1	SLC25A5
		BHLHE40	NUP58		ANKRD18B	RHOC		BHLHE40	DSP		NUP58	DSP		ANKRD18B	DSP		RHOC	DSP
		PPARG	NOP56		PHF21A	ATP13A1		PPARG	HSPB1		NOP56	HSPB1	1	PHF21A	HSPB1		ATP13A1	HSPB1
	1	FNDC3B			AGAP3	GPRC5A		FNDC3B	PRKD1			PRKD1		AGAP3	PRKD1		GPRC5A	PRKD1
		ATF7			SCFD2	PGD		ATF7	RPL18A			RPL18A		SCFD2	RPL18A		PGD	RPL18A
		SIRT1			IST1	FARSB	1	SIRT1	KPNA2			KPNA2		IST1	KPNA2		FARSB	KPNA2
	1	YWHAB			AMPD3	CAPN2		YWHAB	HNRNPH1			HNRNPH1		AMPD3	HNRNPH1		CAPN2	HNRNPH1
		FOXJ3			CNOT3	ANKRD18B		FOXJ3	PPP1CB			PPP1CB		CNOT3	PPP1CB		ANKRD18B	PPP1CB
		RAF1			OLA1	OLA1	1	RAF1	HAX1			HAX1		OLA1	HAX1		OLA1	HAX1
		HDAC3			NDUFS2	PRDX5	1	HDAC3	AP1M2			AP1M2		NDUFS2	AP1M2		PRDX5	AP1M2
	1	FBRSL1			EGLN1	TUBA1B		FBRSL1	PSMA7			PSMA7		EGLN1	PSMA7		TUBA1B	PSMA7
		MED12			TRIP10	ARL6IP5	1	MED12	NEK9			NEK9		TRIP10	NEK9		ARL6IP5	NEK9
		CRTC2			CADPS2	SERPINB8		CRTC2	MYL6			MYL6		CADPS2	MYL6		SERPINB8	MYL6
		PIAS3			THEM6	ACP1	1	PIAS3	FLII			FLII		THEM6	FLII		ACP1	FLII
		KMT2D			PFDN4	HADHA	1	KMT2D	ATP5A1			ATP5A1		PFDN4	ATP5A1		HADHA	ATP5A1
		USP34			S100A16	ALDOC		USP34	PSMD1			PSMD1		S100A16	PSMD1		ALDOC	PSMD1
		TEAD1			MIS18A	VAMP3		TEAD1	FLOT1			FLOT1		MIS18A	FLOT1		VAMP3	FLOT1
	1	PGAM1			LIN54	PDCD6		PGAM1	ENO1			ENO1	1	LIN54	ENO1		PDCD6	ENO1
		STEEP1			DPF2	S100A16		STEEP1	ATP6V1A			ATP6V1A	1	DPF2	ATP6V1A		S100A16	ATP6V1A
		TFAP2C			VPS39	NCEH1		TFAP2C	MYO5B			MYO5B		VPS39	MYO5B		NCEH1	MYO5B
		SKI			CLOCK	GNG12	1	SKI	PSMD11			PSMD11		CLOCK	PSMD11		GNG12	PSMD11
		VGLL4			NDUFAF7	NCCRP1		VGLL4	CEP131			CEP131		NDUFAF7	CEP131		NCCRP1	CEP131
		ZBTB10			PKP4	DGAT1		ZBTB10	GNAI3			GNAI3		PKP4	GNAI3		DGAT1	GNAI3
		ETV5			SMARCD3	CSTA	1	ETV5	RPS11			RPS11		SMARCD3	RPS11		CSTA	RPS11
		LDB1			RC3H1	C11orf98	1	LDB1	NUP188			NUP188		RC3H1	NUP188		C11orf98	NUP188
		ESS2			PRICKLE1	BICD1		ESS2	CKB			CKB		PRICKLE1	CKB		BICD1	CKB
		PHF14			SHROOM3	CLPB		PHF14	TOM1			TOM1		SHROOM3	TOM1		CLPB	TOM1
		TBX1			IPMK	PDHB		TBX1	PSMC2			PSMC2		IPMK	PSMC2		PDHB	PSMC2
		TTN			SIPA1	LIMS1		TTN	ABCD3			ABCD3		SIPA1	ABCD3		LIMS1	ABCD3
	1	ZNF703			LAMTOR1	CDSN		ZNF703	PSMC6			PSMC6		LAMTOR1	PSMC6		CDSN	PSMC6
	1	PAXIP1			SSBP2	SNRNP70	1	PAXIP1	2022-03-01			2022-03-01	1	SSBP2	2022-03-01		SNRNP70	2022-03-01
		DLX1			RICTOR	ZFR		DLX1	SEC23B			SEC23B		RICTOR	SEC23B		ZFR	SEC23B
		CSTF2T			CAV1	SSBP1		CSTF2T	AAAS			AAAS	1	CAV1	AAAS		SSBP1	AAAS
		ETV3			WIPI1	EWSR1	1	ETV3	UBXN6			UBXN6	1	WIPI1	UBXN6		EWSR1	UBXN6
		RBM4			NDUFS3	CLOCK		RBM4	ILF2			ILF2		NDUFS3	ILF2		CLOCK	ILF2
		RING1			MCM3AP	PKP4		RING1	PKM			PKM		MCM3AP	PKM		PKP4	PKM
		VEZF1			CEP192	SEC61B		VEZF1	MYO5C			MYO5C		CEP192	MYO5C		SEC61B	MYO5C
		TFAP2D			TANC2	HNRNPAB		TFAP2D	ACTR3			ACTR3		TANC2	ACTR3		HNRNPAB	ACTR3
	1	TMCO1			KLHL13	NDUFA4		TMCO1	TKT			TKT		KLHL13	TKT		NDUFA4	TKT
		GLI3			SKA3	RNH1	1	GLI3	FLOT2			FLOT2		SKA3	FLOT2		RNH1	FLOT2
		GTF2A1			MGST3	FOXP1		GTF2A1	RPS23			RPS23		MGST3	RPS23	1	FOXP1	RPS23
		CEBPB			TANK	PRPF4B	1	CEBPB	SUMO2			SUMO2		TANK	SUMO2		PRPF4B	SUMO2
		KDM2B			GLUL	GLRX	1	KDM2B	HPS6			HPS6	1	GLUL	HPS6		GLRX	HPS6
		PPIL3			SYNJ1	PLD3	1	PPIL3	TCP1			TCP1		SYNJ1	TCP1		PLD3	TCP1
		ZNF318			GABPA	PSMB1	1	ZNF318	AHCYL1			AHCYL1		GABPA	AHCYL1	1	PSMB1	AHCYL1
		EMSY			CCDC102A	PLP2		EMSY	FADS2			FADS2		CCDC102A	FADS2		PLP2	FADS2
		ZNF362			ALDH7A1	BMP2K	1	ZNF362	PSMB5			PSMB5		ALDH7A1	PSMB5		BMP2K	PSMB5
		GLIS3			NUDCD3	ARL6IP4		GLIS3	MCM2			MCM2		NUDCD3	MCM2		ARL6IP4	MCM2
		PFDN4			KIF1C	SFN		PFDN4	PSMC5			PSMC5		KIF1C	PSMC5		SFN	PSMC5
	1	ALDOC			TM7SF2	GANAB		ALDOC	PSMD7			PSMD7		TM7SF2	PSMD7		GANAB	PSMD7
		ERF			TRIM9	PABPC4		ERF	RRM2			RRM2		TRIM9	RRM2		PABPC4	RRM2
		MED17			SPART	KRT6B	1	MED17	PSMA2			PSMA2		SPART	PSMA2		KRT6B	PSMA2
		RAVER2			MAP4K3	NDUFS3		RAVER2	TJP1			TJP1		MAP4K3	TJP1		NDUFS3	TJP1
		MAML3			NME2	SFXN1		MAML3	KRT3			KRT3		NME2	KRT3		SFXN1	KRT3
		MED27			FAM117B	MCM3AP	1	MED27	RPL24			RPL24		FAM117B	RPL24		MCM3AP	RPL24
		RC3H1			PDLIM4	GALK1		RC3H1	GLUL			GLUL		PDLIM4	GLUL		GALK1	GLUL
		GATA6			GAB1	CTSD		GATA6	GDF15			GDF15		GAB1	GDF15		CTSD	GDF15
		KAT6B			MIB2	HNRNPDL		KAT6B	DYNC1H1			DYNC1H1		MIB2	DYNC1H1		HNRNPDL	DYNC1H1
	1	RNH1			RBMS1	SLC3A2		RNH1	GNB2			GNB2		RBMS1	GNB2		SLC3A2	GNB2
		KDELR1			ERRFI1	UBE2L3		KDELR1	TELO2			TELO2		ERRFI1	TELO2		UBE2L3	TELO2
		SSBP2			CCP110	NDUFS8	1	SSBP2	CAPZA2			CAPZA2		CCP110	CAPZA2		NDUFS8	CAPZA2
		BCL7A			SMARCD1	H1-10	1	BCL7A	FAM83D			FAM83D	1	SMARCD1	FAM83D		H1-10	FAM83D
		TCF3			L3MBTL2	TALDO1		TCF3	TOM1L2			TOM1L2		L3MBTL2	TOM1L2		TALDO1	TOM1L2
		YWHAG			POM121	MGST3		YWHAG	GDI1			GDI1		POM121	GDI1		MGST3	GDI1
		SLU7			AKAP8L	CFAP20		SLU7	PSMB4			PSMB4		AKAP8L	PSMB4		CFAP20	PSMB4
		TCF7L1			LBR	RBMS2		TCF7L1	GNAI1			GNAI1		LBR	GNAI1		RBMS2	GNAI1
	1	CBFB			TBC1D8B	H1-4		CBFB	TSEN34			TSEN34		TBC1D8B	TSEN34		H1-4	TSEN34
		MED30			PPP6R2	UBE2E1		MED30	PSMA6			PSMA6		PPP6R2	PSMA6		UBE2E1	PSMA6
		SAP130			ARHGAP27	BOLA2; BOLA2B	1	SAP130	LRRC58			LRRC58		ARHGAP27	LRRC58		BOLA2; BOLA2B	LRRC58
		SDHA			IRF2BP2	COX17		SDHA	HNRNPH3			HNRNPH3	1	IRF2BP2	HNRNPH3		COX17	HNRNPH3
		L3MBTL2			TLK2	AARS1		L3MBTL2	HIST1H4A			HIST1H4A		TLK2	HIST1H4A		AARS1	HIST1H4A
		BAHCC1			INVS	GLUL		BAHCC1	RPS8			RPS8		INVS	RPS8	1	GLUL	RPS8
		POM121			AZI2	SUGT1		POM121	RNF213			RNF213		AZI2	RNF213		SUGT1	RNF213
		NFRKB			PIGU	CPNE1	1	NFRKB	ACSL3			ACSL3		PIGU	ACSL3		CPNE1	ACSL3
		AKAP8L			STRN4	DENR		AKAP8L	PHB2			PHB2		STRN4	PHB2		DENR	PHB2
		YEATS2			SARG	ADGRE5		YEATS2	LDHA			LDHA		SARG	LDHA		ADGRE5	LDHA
	1	FAM168B			LTF	MLF2		FAM168B	TARDBP			TARDBP		LTF	TARDBP	1	MLF2	TARDBP
		HARS1			HARS1	RDH11		HARS1	TOLLIP			TOLLIP		HARS1	TOLLIP		RDH11	TOLLIP
		NR2F2			WDFY1	GLOD4		NR2F2	ARPC1A			ARPC1A		WDFY1	ARPC1A		GLOD4	ARPC1A
	1	CAT			APEH	FN1		CAT	MYCBP2			MYCBP2		APEH	MYCBP2	1	FN1	MYCBP2
		DNTTIP1			TAB3	CBR3	1	DNTTIP1	RPS3			RPS3		TAB3	RPS3		CBR3	RPS3
		PPIL2			SNF8	CLTA		PPIL2	UBR5			UBR5		SNF8	UBR5		CLTA	UBR5
		MED28			UBAP1	ATXN7L3B		MED28	PSMD14			PSMD14		UBAP1	PSMD14		ATXN7L3B	PSMD14
		SOX21		1	CAT	CBFB		SOX21	CPSF7			CPSF7		CAT	CPSF7		CBFB	CPSF7
		FOXP4			LYRM7	CIRBP	1	FOXP4	CSE1L			CSE1L		LYRM7	CSE1L		CIRBP	CSE1L
		ZFHX4		1	TMEM41B	SRSF3		ZFHX4	HNRNPU			HNRNPU		TMEM41B	HNRNPU		SRSF3	HNRNPU
		EP400			WDR83	TUBB6	1	EP400	RPS6			RPS6		WDR83	RPS6		TUBB6	RPS6
		PLIN4			CASKIN2	TM7SF2		PLIN4	LARP1			LARP1		CASKIN2	LARP1		TM7SF2	LARP1
					PPP1R15B	ACAT1			PSMD6			PSMD6		PPP1R15B	PSMD6		ACAT1	PSMD6
				1	PNP	HNRNPH2			PGAM5			PGAM5		PNP	PGAM5		HNRNPH2	PGAM5
					CAMSAP3	NOP56			CDC42BPA			CDC42BPA		CAMSAP3	CDC42BPA		NOP56	CDC42BPA
				1	TGM3	LTA4H			CCT4			CCT4		TGM3	CCT4		LTA4H	CCT4
					GFPT2	NDUFA13			RPS6KA1			RPS6KA1		GFPT2	RPS6KA1		NDUFA13	RPS6KA1
					KDM3A	NME2			RPL23			RPL23	1	KDM3A	RPL23		NME2	RPL23
					CCDC50	UBE2Z			MLF2			MLF2		CCDC50	MLF2		UBE2Z	MLF2
					TSTD2	RBMS1			APRT			APRT		TSTD2	APRT		RBMS1	APRT
					TDRP	SFXN3			PSMA1			PSMA1		TDRP	PSMA1		SFXN3	PSMA1
					GLMN	PPIG			CYFIP1			CYFIP1		GLMN	CYFIP1		PPIG	CYFIP1
				1	HMGN1	PA2G4			EXPH5			EXPH5		HMGN1	EXPH5	1	PA2G4	EXPH5
					GLCCI1	GPATCH8			SNRNP200			SNRNP200		GLCCI1	SNRNP200		GPATCH8	SNRNP200
				1	EI24	HADHB			ACY1			ACY1		EI24	ACY1		HADHB	ACY1
					MAPT	BLMH			TXNRD1			TXNRD1		MAPT	TXNRD1		BLMH	TXNRD1
					SPRY4	PSMF1			DHX15			DHX15		SPRY4	DHX15		PSMF1	DHX15
				1	CASP14	SERPINB6			EFTUD2			EFTUD2		CASP14	EFTUD2		SERPINB6	EFTUD2
					MED8	SUCLA2			SF3B1			SF3B1	1	MED8	SF3B1		SUCLA2	SF3B1
					EP400	GPATCH4			MMS19			MMS19		EP400	MMS19		GPATCH4	MMS19
					NDUFV1	OTUB1			CSNK2A1			CSNK2A1		NDUFV1	CSNK2A1		OTUB1	CSNK2A1
					NR3C2	PNN			VPS51			VPS51		NR3C2	VPS51	1	PNN	VPS51
					ZSWIM8	PRNP			RBM14			RBM14		ZSWIM8	RBM14		PRNP	RBM14
					IP6K1	SREK1			POLD1			POLD1		IP6K1	POLD1		SREK1	POLD1
				1	SPICE1	PRKACA			MYO1B			MYO1B		SPICE1	MYO1B		PRKACA	MYO1B
					CEP152	PTPN11			LIMCH1			LIMCH1		CEP152	LIMCH1	1	PTPN11	LIMCH1
					CAPN15	EIF3L			CAPZB			CAPZB		CAPN15	CAPZB		EIF3L	CAPZB
					MPP1	CARM1			GNAS			GNAS		MPP1	GNAS		CARM1	GNAS
					MAPK8IP3	SPCS2			TMOD3			TMOD3		MAPK8IP3	TMOD3		SPCS2	TMOD3
					CLNS1A	FASTKD5			PSMD12			PSMD12		CLNS1A	PSMD12		FASTKD5	PSMD12
					HAUS7	AHI1			HUWE1			HUWE1		HAUS7	HUWE1		AHI1	HUWE1
					ZWINT	POF1B			TRIM25			TRIM25		ZWINT	TRIM25		POF1B	TRIM25
				1	GDI2	ATP5PB			RPS5			RPS5		GDI2	RPS5		ATP5PB	RPS5
				1	IDE	SRSF9			RPS4X			RPS4X	1	IDE	RPS4X		SRSF9	RPS4X
					TOMM34	FAM168B			GNB1			GNB1		TOMM34	GNB1		FAM168B	GNB1
					PPP1R13B	ANP32E			CAND1			CAND1		PPP1R13B	CAND1		ANP32E	CAND1
				1	YIF1A	CAT			GRSF1			GRSF1		YIF1A	GRSF1		CAT	GRSF1
					BUB1	SRI			FAF2			FAF2		BUB1	FAF2		SRI	FAF2
				1	HLA-A	TMEM41B			MAOA			MAOA		HLA-A	MAOA		TMEM41B	MAOA
				1	TPI1	SERPINB3			PSMB1			PSMB1		TPI1	PSMB1		SERPINB3	PSMB1
				1	NPEPPS	PSMB6			RPL27A			RPL27A		NPEPPS	RPL27A		PSMB6	RPL27A
				1	JMJD1C	RAB12			ASNS			ASNS	1	JMJD1C	ASNS		RAB12	ASNS
					HNRNPM	SCCPDH			RNF31			RNF31	1	HNRNPM	RNF31		SCCPDH	RNF31
				1	BCL9L	MRPS2			RPL3			RPL3	1	BCL9L	RPL3		MRPS2	RPL3
					HSPA9	ARG1			DPY30			DPY30	1	HSPA9	DPY30		ARG1	DPY30
				1	CAD	PNP			RPS7			RPS7		CAD	RPS7		PNP	RPS7
					FOXA2	CCHCR1			DHX9			DHX9		FOXA2	DHX9		CCHCR1	DHX9
				1	VDAC2	S100A13			EIF3I			EIF3I		VDAC2	EIF3I		S100A13	EIF3I
				1	NCOR1	TGM3			SEC13			SEC13	1	NCOR1	SEC13		TGM3	SEC13
				1	BCL9	PTMA			RPS16			RPS16	1	BCL9	RPS16		PTMA	RPS16
				1	ZNF503	SRRM2			METTL13			METTL13		ZNF503	METTL13		SRRM2	METTL13
					HNRNPF	DKC1			PSMD3			PSMD3		HNRNPF	PSMD3		DKC1	PSMD3
					USP7	RBBP5			NUBP2			NUBP2	1	USP7	NUBP2	1	RBBP5	NUBP2
					CCAR2	CIZ1			ME1			ME1	1	CCAR2	ME1		CIZ1	ME1
					NUDT21	SBSN			PAICS			PAICS	1	NUDT21	PAICS		SBSN	PAICS
				1	CSNK2A1	SOX21			FANCG			FANCG	1	CSNK2A1	FANCG		SOX21	FANCG
					RAVER1	MAIP1			TRIB3			TRIB3	1	RAVER1	TRIB3		MAIP1	TRIB3
				1	HELZ	HMGN1			G3BP1			G3BP1		HELZ	G3BP1		HMGN1	G3BP1
					ZNF384	ABHD10			DPH1			DPH1		ZNF384	DPH1		ABHD10	DPH1
					MIDEAS	ACOT13			EIF2S1			EIF2S1		MIDEAS	EIF2S1		ACOT13	EIF2S1
				1	UTP20	ACYP2			PSMD13			PSMD13		UTP20	PSMD13		ACYP2	PSMD13
					NFIB	AGPS			DAK			DAK	1	NFIB	DAK		AGPS	DAK
					EP300	APOB			TYSND1			TYSND1	1	EP300	TYSND1		APOB	TYSND1
					SF1	APRT			HNRNPM			HNRNPM		SF1	HNRNPM	1	APRT	HNRNPM
					RPRD2	ARGLU1			UBAP2L			UBAP2L	1	RPRD2	UBAP2L		ARGLU1	UBAP2L
					NFIC	ATP5F1D			AURKB			AURKB	1	NFIC	AURKB		ATP5F1D	AURKB
					DCAF7	ATP6V1B2			RPS4Y1			RPS4Y1		DCAF7	RPS4Y1		ATP6V1B2	RPS4Y1
					RPA1	ATXN1L			FXR1			FXR1		RPA1	FXR1	1	ATXN1L	FXR1
				1	RBM33	AZGP1			AP5B1			AP5B1	1	RBM33	AP5B1		AZGP1	AP5B1
				1	SIDT1	BDNF			KIAA1217			KIAA1217		SIDT1	KIAA1217		BDNF	KIAA1217
				1	PYGO2	BLVRB			PHGDH			PHGDH	1	PYGO2	PHGDH		BLVRB	PHGDH
					CUX1	CALML3			H2AFJ			H2AFJ	1	CUX1	H2AFJ		CALML3	H2AFJ
					PRRC2A	CFL2			FARSA			FARSA		PRRC2A	FARSA		CFL2	FARSA
					HNRNPUL1	EI24			ALDH16A1			ALDH16A1		HNRNPUL1	ALDH16A1		EI24	ALDH16A1
					CPSF6	CITED2			ATP5B			ATP5B	1	CPSF6	ATP5B		CITED2	ATP5B
				1	HIPK2	COX7A2			IPO4			IPO4		HIPK2	IPO4		COX7A2	IPO4
					CPSF7	CRYZ			CTNNA1			CTNNA1	1	CPSF7	CTNNA1		CRYZ	CTNNA1
					PIAS2	DERPC			ACTN4			ACTN4	1	PIAS2	ACTN4		DERPC	ACTN4
					PIAS1	DPY30			VDAC1			VDAC1	1	PIAS1	VDAC1	1	DPY30	VDAC1
				1	FAM168A	DUSP3			POLR2H			POLR2H		FAM168A	POLR2H		DUSP3	POLR2H
					CREBBP	EMC1			YWHAZ			YWHAZ	1	CREBBP	YWHAZ		EMC1	YWHAZ
					RBM27	EMC7			RAB10			RAB10	1	RBM27	RAB10		EMC7	RAB10
					MEF2D	FAM120C			TRAF4			TRAF4	1	MEF2D	TRAF4		FAM120C	TRAF4
					ZC3H14	FN3KRP			GTF2H2C			GTF2H2C		ZC3H14	GTF2H2C		FN3KRP	GTF2H2C
					HDAC1	GAA			RAP1A			RAP1A	1	HDAC1	RAP1A		GAA	RAP1A
					CDKN2AIP	GFUS			TAF15			TAF15		CDKN2AIP	TAF15		GFUS	TAF15
					ZFP91	GGCT			RPS9			RPS9		ZFP91	RPS9		GGCT	RPS9
					AKAP8	GNS			RPS13			RPS13		AKAP8	RPS13		GNS	RPS13
					FOXK1	GSDMA			TRIM32			TRIM32	1	FOXK1	TRIM32		GSDMA	TRIM32
					RAI1	GSR			PRAME			PRAME	1	RAI1	PRAME		GSR	PRAME
					WIZ	GSTP1			PRKAG1			PRKAG1	1	WIZ	PRKAG1		GSTP1	PRKAG1
					CSNK2B	HSD17B2			BAG6			BAG6	1	CSNK2B	BAG6		HSD17B2	BAG6
					BCL6	CASP14			PARP12			PARP12	1	BCL6	PARP12		CASP14	PARP12
				1	HDAC2	DROSHA			PSMB2			PSMB2	1	HDAC2	PSMB2		DROSHA	PSMB2
					CSNK2A2	ITGB4			TONSL			TONSL		CSNK2A2	TONSL		ITGB4	TONSL
					RBM12	IVL			DHFR			DHFR	1	RBM12	DHFR		IVL	DHFR
				1	NCOA6	LGALS7; LGALS7B			NVL			NVL	1	NCOA6	NVL		LGALS7; LGALS7B	NVL
					TNRC18	LMAN2			RPLP0P6			RPLP0P6	1	TNRC18	RPLP0P6		LMAN2	RPLP0P6
					NACC1	LUC7L2			NPRL3			NPRL3		NACC1	NPRL3		LUC7L2	NPRL3
					ZBTB33	LUC7L3			C14orf80			C14orf80	1	ZBTB33	C14orf80		LUC7L3	C14orf80
					BRD4	MT-CYB			H3F3A			H3F3A	1	BRD4	H3F3A		MT-CYB	H3F3A
					PAX9	MTPAP			VPS13C			VPS13C		PAX9	VPS13C		MTPAP	VPS13C
				1	ANK3	MTPN			MYO18A			MYO18A		ANK3	MYO18A		MTPN	MYO18A
					SMARCD2	NOLC1			CGN			CGN	1	SMARCD2	CGN		NOLC1	CGN
					RXRA	NSDHL			PSMB3			PSMB3		RXRA	PSMB3		NSDHL	PSMB3
					CPEB4	OXA1L			PCBP2			PCBP2		CPEB4	PCBP2		OXA1L	PCBP2
					TRPS1	PDIA4			HRNR			HRNR	1	TRPS1	HRNR		PDIA4	HRNR
					ANKHD1	PFAS			ACTR2			ACTR2		ANKHD1	ACTR2		PFAS	ACTR2
				1	SUB1	PGLS			CNDP2			CNDP2		SUB1	CNDP2		PGLS	CNDP2
					TLE3	PPIB			MAGEA2			MAGEA2	1	TLE3	MAGEA2		PPIB	MAGEA2
				1	LGALS1	PRSS3			LMNB1			LMNB1		LGALS1	LMNB1		PRSS3	LMNB1
				1	ATXN2	PTGR1			FN1			FN1		ATXN2	FN1		PTGR1	FN1
				1	GSE1	PTRH2			HIST1H2BC			HIST1H2BC	1	GSE1	HIST1H2BC		PTRH2	HIST1H2BC
				1	DNAJB2	RBFOX2			MYL12B			MYL12B		DNAJB2	MYL12B		RBFOX2	MYL12B
					KMT2C	RBPMS			H2AFY			H2AFY		KMT2C	H2AFY		RBPMS	H2AFY
					KDM3B	RCC1			SSFA2			SSFA2	1	KDM3B	SSFA2		RCC1	SSFA2
				1	GPS2	SPICE1			TAX1BP1			TAX1BP1	1	GPS2	TAX1BP1		SPICE1	TAX1BP1
				1	SUCLG1	SCAF1			UGT2B11			UGT2B11		SUCLG1	UGT2B11		SCAF1	UGT2B11
					KLF4	SCP2			HECTD4			HECTD4	1	KLF4	HECTD4		SCP2	HECTD4
					MED1	SERPINB12			DOT1L			DOT1L	1	MED1	DOT1L		SERPINB12	DOT1L
				1	PRRC2B	SMC2			MED12			MED12	1	PRRC2B	MED12		SMC2	MED12
				1	RUNX1	SPCS3			DMAP1			DMAP1		RUNX1	DMAP1		SPCS3	DMAP1
					RNF121	SRCAP			POLH			POLH		RNF121	POLH	1	SRCAP	POLH
					MORC4	SRP9			NIPBL			NIPBL	1	MORC4	NIPBL		SRP9	NIPBL
					BHLHE40	SRSF10			KLF4			KLF4		BHLHE40	KLF4		SRSF10	KLF4
					PPARG	TIAL1			AFF4			AFF4		PPARG	AFF4		TIAL1	AFF4
					ATF7	TIMM13			CCNT1			CCNT1		ATF7	CCNT1		TIMM13	CCNT1
				1	YWHAB	GDI2			CPSF6			CPSF6		YWHAB	CPSF6		GDI2	CPSF6
					FOXJ3	TMED4			CSNK2B			CSNK2B		FOXJ3	CSNK2B		TMED4	CSNK2B
					RAF1	IDE			CTR9			CTR9	1	RAF1	CTR9	1	IDE	CTR9
					HDAC3	TPP1			C11orf30			C11orf30	1	HDAC3	C11orf30		TPP1	C11orf30
				1	FBRSL1	UQCRFS1			HIVEP1			HIVEP1		FBRSL1	HIVEP1		UQCRFS1	HIVEP1
					MED12	YIF1A			KIF4A			KIF4A	1	MED12	KIF4A		YIF1A	KIF4A
					PIAS3	VPS29			MRPS9			MRPS9	1	PIAS3	MRPS9		VPS29	MRPS9
					KMT2D	HLA-A			PHF12			PHF12	1	KMT2D	PHF12		HLA-A	PHF12
					USP34	TPI1			RBM17			RBM17		USP34	RBM17		TPI1	RBM17
					TEAD1	YIF1B			TAF7			TAF7		TEAD1	TAF7		YIF1B	TAF7
					STEEP1				TLE1			TLE1		STEEP1	TLE1			TLE1
					TFAP2C				TLE4			TLE4		TFAP2C	TLE4			TLE4
					SKI				TPX2			TPX2	1	SKI	TPX2			TPX2
					VGLL4				XAB2			XAB2		VGLL4	XAB2			XAB2
				1	RB1				ACTL6A			ACTL6A	1	RB1	ACTL6A			ACTL6A
					ZBTB10				AHDC1			AHDC1		ZBTB10	AHDC1			AHDC1
					ETV5				ANLN			ANLN	1	ETV5	ANLN			ANLN
					LDB1				ATF2			ATF2	1	LDB1	ATF2			ATF2
					ESS2				ATN1			ATN1		ESS2	ATN1			ATN1
					PHF14				ATXN1			ATXN1		PHF14	ATXN1			ATXN1
					TBX1				ATXN1L			ATXN1L		TBX1	ATXN1L			ATXN1L
				1	TTN				BAP1			BAP1		TTN	BAP1			BAP1
					RCOR1				TRERF1			TRERF1	1	RCOR1	TRERF1			TRERF1
				1	ZNF703				BCL6			BCL6		ZNF703	BCL6			BCL6
				1	PAXIP1				BCL9			BCL9	1	PAXIP1	BCL9			BCL9
				1	DLX1				BCL9L			BCL9L		DLX1	BCL9L			BCL9L
					CSTF2T				BRD8			BRD8		CSTF2T	BRD8			BRD8
					ETV3				BRMS1			BRMS1	1	ETV3	BRMS1			BRMS1
					RBM4				C16orf87			C16orf87		RBM4	C16orf87			C16orf87
					RING1				CDC73			CDC73		RING1	CDC73			CDC73
				1	DNAJB11				CDCA2			CDCA2		DNAJB11	CDCA2			CDCA2
					VEZF1				CDK8			CDK8		VEZF1	CDK8			CDK8
					TFAP2D				CHAMP1			CHAMP1		TFAP2D	CHAMP1			CHAMP1
					GLI3				CHERP			CHERP	1	GLI3	CHERP			CHERP
				1	ATP5MK				CIC			CIC		ATP5MK	CIC			CIC
				1	PPP2R2A				CLP1			CLP1	1	PPP2R2A	CLP1			CLP1
					PKP3				DDX42			DDX42		PKP3	DDX42			DDX42
				1	CHGB				DNTTIP1			DNTTIP1		CHGB	DNTTIP1			DNTTIP1
					CEBPB				ELF2			ELF2	1	CEBPB	ELF2			ELF2
					KDM2B				ELMSAN1			ELMSAN1	1	KDM2B	ELMSAN1			ELMSAN1
					PPIL3				EP400			EP400	1	PPIL3	EP400			EP400
					ZNF318				ETV3			ETV3	1	ZNF318	ETV3			ETV3
				1	SKP1				FBRS			FBRS		SKP1	FBRS			FBRS
					TAF9				FOSL2			FOSL2		TAF9	FOSL2			FOSL2
					VPS18				FOXP1			FOXP1		VPS18	FOXP1			FOXP1
					ZNF362				FOXP4			FOXP4	1	ZNF362	FOXP4			FOXP4
					GLIS3				GATAD1			GATAD1		GLIS3	GATAD1			GATAD1
					C3P1				GPS2			GPS2		C3P1	GPS2			GPS2
				1	ALDOC				GRHL1			GRHL1		ALDOC	GRHL1			GRHL1
					ERF				GRHL2			GRHL2		ERF	GRHL2			GRHL2
					TOMM40				HEXIM1			HEXIM1		TOMM40	HEXIM1			HEXIM1
					MED17				HMG20B			HMG20B	1	MED17	HMG20B			HMG20B
					RAVER2				ING1			ING1		RAVER2	ING1			ING1
					MAML3				IRF2BP2			IRF2BP2		MAML3	IRF2BP2			IRF2BP2
					MED27				KANSL3			KANSL3	1	MED27	KANSL3			KANSL3
					GATA6				KDM2B			KDM2B		GATA6	KDM2B			KDM2B
					KAT6B				KDM3B			KDM3B		KAT6B	KDM3B			KDM3B
				1	RNH1				KIFC1			KIFC1		RNH1	KIFC1			KIFC1
					KDELR1				KLF5			KLF5		KDELR1	KLF5			KLF5
					BCL7A				CASC5			CASC5	1	BCL7A	CASC5			CASC5
					TCF3				LDB1			LDB1		TCF3	LDB1			LDB1
					YWHAG				LENG8			LENG8		YWHAG	LENG8			LENG8
					SLU7				LIN54			LIN54		SLU7	LIN54			LIN54
					PRKAG1				LIN9			LIN9	1	PRKAG1	LIN9			LIN9
					FOXK2				MAML1			MAML1		FOXK2	MAML1			MAML1
					TCF7L1				MBD2			MBD2		TCF7L1	MBD2			MBD2
				1	CBFB				MED13			MED13		CBFB	MED13			MED13
					MIER1				MED13L			MED13L		MIER1	MED13L			MED13L
					CDIPT				MED14			MED14		CDIPT	MED14			MED14
					MED30				MED15			MED15		MED30	MED15			MED15
					SAP130				MED17			MED17	1	SAP130	MED17			MED17
					SDHA				MED18			MED18		SDHA	MED18			MED18
					BAHCC1				MED22			MED22		BAHCC1	MED22			MED22
					NIPBL				MED4			MED4	1	NIPBL	MED4			MED4
					NFRKB				MED6			MED6	1	NFRKB	MED6			MED6
					MED20				MED8			MED8	1	MED20	MED8			MED8
					YEATS2				MEF2A			MEF2A		YEATS2	MEF2A			MEF2A
				1	FAM168B				MEF2D			MEF2D		FAM168B	MEF2D			MEF2D
					TMED5				MEPCE			MEPCE		TMED5	MEPCE			MEPCE
					NR2F2				MGA			MGA		NR2F2	MGA			MGA
					DNTTIP1				MORC4			MORC4	1	DNTTIP1	MORC4			MORC4
					ISY1				NELFA			NELFA		ISY1	NELFA			NELFA
					KDM6A				NELFE			NELFE		KDM6A	NELFE			NELFE
				1	CCHCR1				NFIB			NFIB		CCHCR1	NFIB			NFIB
					PPIL2				NFIC			NFIC		PPIL2	NFIC			NFIC
					SP2				NFIX			NFIX		SP2	NFIX			NFIX
					PAGR1				NFRKB			NFRKB	1	PAGR1	NFRKB			NFRKB
					MED28				OGT			OGT		MED28	OGT			OGT
				1	SOX21				PAXIP1			PAXIP1		SOX21	PAXIP1			PAXIP1
				1	DROSHA				PCF11			PCF11		DROSHA	PCF11			PCF11
					FOXP4				PCGF1			PCGF1	1	FOXP4	PCGF1			PCGF1
					ZFHX4				PHF21A			PHF21A		ZFHX4	PHF21A			PHF21A
					ADO				PHF3			PHF3		ADO	PHF3			PHF3
					UBN2				PRR12			PRR12	1	UBN2	PRR12			PRR12
					PLIN4				PRRC2B			PRRC2B		PLIN4	PRRC2B			PRRC2B
									PYGO2			PYGO2			PYGO2			PYGO2
									QSER1			QSER1			QSER1			QSER1
									RAVER1			RAVER1			RAVER1			RAVER1
									RBM10			RBM10			RBM10			RBM10
									RBM12			RBM12			RBM12			RBM12
									RBM26			RBM26			RBM26			RBM26
									RBM27			RBM27			RBM27			RBM27
									RBM33			RBM33			RBM33			RBM33
									RCOR3			RCOR3			RCOR3			RCOR3
									RERE			RERE			RERE			RERE
									RFX5			RFX5			RFX5			RFX5
									RPRD2			RPRD2			RPRD2			RPRD2
									SAP130			SAP130			SAP130			SAP130
									SCML2			SCML2			SCML2			SCML2
									CCDC101			CCDC101			CCDC101			CCDC101
									SKI			SKI			SKI			SKI
									SKIL			SKIL			SKIL			SKIL
									SMARCD2			SMARCD2			SMARCD2			SMARCD2
									SSBP2			SSBP2			SSBP2			SSBP2
									TEAD3			TEAD3			TEAD3			TEAD3
									TET2			TET2			TET2			TET2
									TNRC18			TNRC18			TNRC18			TNRC18
									TRIM33			TRIM33			TRIM33			TRIM33
									TRPS1			TRPS1			TRPS1			TRPS1
									UBN2			UBN2			UBN2			UBN2
									WAC			WAC			WAC			WAC
									WIZ			WIZ			WIZ			WIZ
									YAP1			YAP1			YAP1			YAP1
									YLPM1			YLPM1			YLPM1			YLPM1
									ZBTB21			ZBTB21			ZBTB21			ZBTB21
									ZBTB33			ZBTB33			ZBTB33			ZBTB33
									ZBTB9			ZBTB9			ZBTB9			ZBTB9
									ZC3H4			ZC3H4			ZC3H4			ZC3H4
									ZHX3			ZHX3			ZHX3			ZHX3
									ZMYND8			ZMYND8			ZMYND8			ZMYND8
									ZNF148			ZNF148			ZNF148			ZNF148
									ZNF217			ZNF217			ZNF217			ZNF217
									ZNF281			ZNF281			ZNF281			ZNF281
									ZNF362			ZNF362			ZNF362			ZNF362
									ZNF512B			ZNF512B			ZNF512B			ZNF512B
									ZNF608			ZNF608			ZNF608			ZNF608
									ZNF609			ZNF609			ZNF609			ZNF609
									ZSCAN21			ZSCAN21			ZSCAN21			ZSCAN21
									BCL7A			BCL7A			BCL7A			BCL7A
									BCL7B			BCL7B			BCL7B			BCL7B
									BCL7C			BCL7C			BCL7C			BCL7C
									BRD7			BRD7			BRD7			BRD7
									CASZ1			CASZ1			CASZ1			CASZ1
									CBX5			CBX5			CBX5			CBX5
									CCNK			CCNK			CCNK			CCNK
									CHD3			CHD3			CHD3			CHD3
									CHD4			CHD4			CHD4			CHD4
									CPSF4			CPSF4			CPSF4			CPSF4
									CREB1			CREB1			CREB1			CREB1
									CUX1			CUX1			CUX1			CUX1
									EHMT2			EHMT2			EHMT2			EHMT2
									EPC1			EPC1			EPC1			EPC1
									EXOSC10			EXOSC10			EXOSC10			EXOSC10
									FOXK1			FOXK1			FOXK1			FOXK1
									GTF3C4			GTF3C4			GTF3C4			GTF3C4
									HCFC1			HCFC1			HCFC1			HCFC1
									HIRA			HIRA			HIRA			HIRA
									IK			IK			IK			IK
									ING2			ING2			ING2			ING2
									INTS12			INTS12			INTS12			INTS12
									ASUN			ASUN			ASUN			ASUN
									INTS4			INTS4			INTS4			INTS4
									MCRS1			MCRS1			MCRS1			MCRS1
									MDC1			MDC1			MDC1			MDC1
									MED10			MED10			MED10			MED10
									MED16			MED16			MED16			MED16
									MED20			MED20			MED20			MED20
									MED21			MED21			MED21			MED21
									MED27			MED27			MED27			MED27
									MTA3			MTA3			MTA3			MTA3
									NFATC2IP			NFATC2IP			NFATC2IP			NFATC2IP
									NFIA			NFIA			NFIA			NFIA
									NUDT21			NUDT21			NUDT21			NUDT21
									ORC2			ORC2			ORC2			ORC2
									PAGR1			PAGR1			PAGR1			PAGR1
									PAXBP1			PAXBP1			PAXBP1			PAXBP1
									PBRM1			PBRM1			PBRM1			PBRM1
									PNN			PNN			PNN			PNN
									PPIL3			PPIL3			PPIL3			PPIL3
									PPWD1			PPWD1			PPWD1			PPWD1
									PRPF3			PRPF3			PRPF3			PRPF3
									RANBP3			RANBP3			RANBP3			RANBP3
									RBBP5			RBBP5			RBBP5			RBBP5
									RBPJ			RBPJ			RBPJ			RBPJ
									RNMT			RNMT			RNMT			RNMT
									RNPS1			RNPS1			RNPS1			RNPS1
									SAP18			SAP18			SAP18			SAP18
									SART1			SART1			SART1			SART1
									SMCHD1			SMCHD1			SMCHD1			SMCHD1
									SUDS3			SUDS3			SUDS3			SUDS3
									SUGP1			SUGP1			SUGP1			SUGP1
									SUPT7L			SUPT7L			SUPT7L			SUPT7L
									TADA2B			TADA2B			TADA2B			TADA2B
									TAF6L			TAF6L			TAF6L			TAF6L
									TAF8			TAF8			TAF8			TAF8
									TAF9B			TAF9B			TAF9B			TAF9B
									TBL1X			TBL1X			TBL1X			TBL1X
									TXNL1			TXNL1			TXNL1			TXNL1
									U2SURP			U2SURP			U2SURP			U2SURP
									UCHL5			UCHL5			UCHL5			UCHL5
									USP28			USP28			USP28			USP28
									WAPAL			WAPAL			WAPAL			WAPAL
									WDR33			WDR33			WDR33			WDR33
									WDR5			WDR5			WDR5			WDR5
									WRNIP1			WRNIP1			WRNIP1			WRNIP1
									ZCCHC8			ZCCHC8			ZCCHC8			ZCCHC8
									ZMYM2			ZMYM2			ZMYM2			ZMYM2
									IRF2BPL			IRF2BPL			IRF2BPL			IRF2BPL
									TIPARP			TIPARP			TIPARP			TIPARP
									DTX3L			DTX3L			DTX3L			DTX3L
									SMARCA5			SMARCA5			SMARCA5			SMARCA5
									HDAC2			HDAC2			HDAC2			HDAC2
									MTAP			MTAP			MTAP			MTAP
									CTBP1			CTBP1			CTBP1			CTBP1
									NKX3-1			NKX3-1			NKX3-1			NKX3-1
									CBX1			CBX1			CBX1			CBX1
									CTBP2			CTBP2			CTBP2			CTBP2
									PIN1			PIN1			PIN1			PIN1

## Sheet: EDF3J
Source data for Supplementary Figure 3J
	WT	Y22S	Y22F
HP	8.03512	1.24724	8.38085
IGFL1	7.43996	0	6.94524
KRT5	7.33047	1.12237	7.84904
PGC	6.92915	-1.61354	6.27976
HSD11B1	6.80697	1.24724	8.23403
MOGAT2	6.63657	2.26109	5.76324
UGT1A7	6.20123	3.54092	6.00055
ORM2	5.49031	0	2.24475
SLC38A4	5.39704	1.39066	4.58169
SIGLEC1	5.13608	-1.65242	5.7062
APOD	3.88248	2.49753	3.19844
CYP4F8	3.74742	0	4.04202
MYBPC1	3.73268	0	3.57139
PNMT	3.51826	0.737093	3.96569
SEPP1	3.19006	0.0383904	3.76222
ALOX15B	3.11029	-0.723444	1.65936
MAOA	2.94866	0.931839	3.1663
SLC15A2	2.51222	0.208807	2.22184
ROS1	2.46639	-0.0599667	3.12115
SEC14L5	2.33524	0.453399	1.86491
AGT	2.22512	0.130393	3.17014
CHRNA3	2.0206	2.12491	1.38899
FIBCD1	2.00516	-0.0151146	2.70927
SCNN1A	1.97481	0.877931	1.79531
PSCA	1.80423	-0.329017	0.559532
KLF9	1.66448	0.832631	2.00233
CP	1.57212	-0.465893	1.97167
DNAH3	1.57022	1.20348	1.25771
LOX	1.52275	0.039027	1.30769
PDE9A	1.49892	0.860377	1.20753
KLK3	1.44778	2.30179	1.23684
ZBTB16	1.44778	0	2.24475

## Sheet: EDF3K
Source data for Supplementary Figure 3K
	log2FoldChange	AR up
AGT	0.943332	2.51568
ALOX15B	-1.44961	3.1794
APOD	-0.681712	0.898151
CHRNA3	-0.628681	0.105242
CP	0.400575	0.610819
CYP4B1	-0.924306	0.945296
CYP4F8	0.297866	0.065952
DNAH3	-0.312066	0.133098
FIBCD1	0.705293	1.84883
HP	0.347308	0.427922
HSD11B1	1.4272	2.58197
IGFL1	-0.493905	0.445924
KLF9	0.339001	1.10438
KLK3	-0.207196	0.017165
KRT5	0.519485	1.79889
LOX	-0.214185	1.80252
MAOA	0.218478	0.990061
MARC1	-0.214951	5.48285
MARC2	-0.025651	0.104074
MARCH1	0.24538	0.339864
MARCH2	-0.215416	1.91792
MOGAT2	-0.871024	0.586433
MYBPC1	-0.162009	0.032335
ORM2	-3.24497	1.38779
PDE9A	-0.290468	0.708955
PGC	-0.649113	0.980365
PNMT	0.450237	0.553131
PSCA	-1.24391	3.40674
ROS1	0.657721	0.881594
SCNN1A	-0.178491	0.877196
SEC14L5	-0.469608	0.51499
SEPP1	0.572855	5.57254
SIGLEC1	0.568997	0.458414
SLC15A2	-0.289919	0.434312
SLC38A4	-0.814338	0.994042
UGT1A7	-0.201679	0.088546
ZBTB16	0.805997	0.090868

## Sheet: EDF3L
Source data for Supplementary Figure 3L
	log2FoldChange	AR up
AGT	-2.09159	11.7083
ALOX15B	-3.83276	17.4456
APOD	-1.38175	6.82392
CHRNA3	0.110707	4.79394
CP	-2.0354	8.93163
CYP4B1	-7.59572	15.4034
CYP4F8	-3.9287	5.10477
DNAH3	-0.366771	5.32352
FIBCD1	-2.01766	15.017
HP	-6.77521	14.3984
HSD11B1	-5.54831	7.21083
IGFL1	-7.62104	15.7675
KLF9	-0.830408	7.23609
KLK3	0.857745	4.28968
KRT5	-6.19064	42.2989
LOX	-1.48232	49.6793
MAOA	-2.01629	45.2862
MARC1	-0.062038	6.04045
MARC2	-0.104495	5.79848
MARCH1	0.314065	5.72484
MARCH2	-0.070353	5.40424
MOGAT2	-4.3754	7.08741
MYBPC1	-3.91359	5.09722
ORM2	-5.67102	5.30488
PDE9A	-0.637307	6.80515
PGC	-8.55162	17.1304
PNMT	-2.7917	9.38699
PSCA	-2.13461	16.8212
ROS1	-2.52689	7.55504
SCNN1A	-1.09646	26.4073
SEC14L5	-1.88037	7.14445
SEPP1	-3.14983	72.5576
SIGLEC1	-6.76288	7.71632
SLC15A2	-2.30621	16.6766
SLC38A4	-3.99741	16.0445
UGT1A7	-2.64327	6.34546
ZBTB16	-1.62992	4.8754
