# Supplementary material for: Rational optimization of a transcription factor activation domain inhibitor
Source: Nat Struct Mol Biol. 2023 Dec 4;30(12):1958–69. doi: 10.1038/s41594-023-01159-5 (PMC10716049; doi:10.1038/s41594-023-01159-5)
Supplement: Supplementary file 22 — Statistical source data. [file 41594_2023_1159_MOESM22_ESM.xlsx]

## Sheet: EDF4D
AR-dNLS droplet size											AR-dNLS droplet count
			um			um2								um			um2*1000			um2
5	15	30	5	15	30	5	15	30			5	15	30	5	15	30	5	15	30	5	15	30
11.104	15.913	20.52	2.59056	3.7125	4.78732	0.604058	0.865667	1.11629			3.05	3.15	2.87	13.0733	13.5019	12.3018	56.0662	57.9044	52.7574	0.0560662	0.0579044	0.0527574
13.4	16.55	28.36	3.12622	3.86112	6.61639	0.72896	0.90032	1.54278			3.53	3.53	1.94	15.1307	15.1307	8.31547	64.8897	64.8897	35.6618	0.0648897	0.0648897	0.0356618
14.903	24.731	36.54	3.47687	5.76974	8.52478	0.810723	1.34537	1.98778			3.79	3.17	1.59	16.2452	13.5877	6.81526	69.6691	58.2721	29.2279	0.0696691	0.0582721	0.0292279
22.286	34.545	70.71	5.19932	8.05935	16.4966	1.21236	1.87925	3.84662			2.84	1.49	0.95	12.1732	6.38663	4.07201	52.2059	27.3897	17.4632	0.0522059	0.0273897	0.0174632
3.857	20.75	24.5	0.899838	4.84098	5.71585	0.209821	1.1288	1.3328			1.25	2.14	1.78	5.35791	9.17274	7.62966	22.9779	39.3382	32.7206	0.0229779	0.0393382	0.0327206
10.8	11.429	17.73	2.51964	2.66639	4.13641	0.58752	0.621738	0.964512			3.58	3	2.15	15.345	12.859	9.2156	65.8088	55.1471	39.5221	0.0658088	0.0551471	0.0395221
0	12.444	12.13	0	2.90319	2.82993	0	0.676954	0.659872			0	1.37	1.22	0	5.87227	5.22932	0	25.1838	22.4265	0	0.0251838	0.0224265
4	12.368	25.17	0.9332	2.88545	5.87216	0.2176	0.672819	1.36925			0.12	2.3	1.45	0.514359	9.85855	6.21517	2.20588	42.2794	26.6544	0.00220588	0.0422794	0.0266544
0	0	8.73	0	0	2.03671	0	0	0.474912			0	0	2.31	0	0	9.90141	0	0	42.4632	0	0	0.0424632
0	0	4	0	0	0.9332	0	0	0.2176			0	0	0.32	0	0	1.37162	0	0	5.88235	0	0	0.00588235
10.783	18.5	32.19	2.51567	4.31605	7.50993	0.586595	1.0064	1.75114			3.62	2.05	1.26	15.5165	8.78697	5.40077	66.5441	37.6838	23.1618	0.0665441	0.0376838	0.0231618
7.342	17.36	16.7	1.71289	4.05009	3.89611	0.399405	0.944384	0.90848			4.54	2.99	2.39	19.4599	12.8161	10.2443	83.4559	54.9632	43.9338	0.0834559	0.0549632	0.0439338
0	20.556	25.89	0	4.79571	6.04014	0	1.11825	1.40842			0	1.35	1.35	0	5.78654	5.78654	0	24.8162	24.8162	0	0.0248162	0.0248162
0	29.875	67	0	6.96984	15.6311	0	1.6252	3.6448			0	1	0.37	0	4.28633	1.58594	0	18.3824	6.80147	0	0.0183824	0.00680147
0	0	5.7	0	0	1.32981	0	0	0.31008			0	0	2.94	0	0	12.6018	0	0	54.0441	0	0	0.0540441
7.667	23.5	44.67	1.78871	5.48255	10.4215	0.417085	1.2784	2.43005			0.2	1.09	0.82	0.857265	4.6721	3.51479	3.67647	20.0368	15.0735	0.00367647	0.0200368	0.0150735
7.83	12.16	20.43	1.82674	2.83693	4.76632	0.425952	0.661504	1.11139			4.2	2.99	1.7	18.0026	12.8161	7.28676	77.2059	54.9632	31.25	0.0772059	0.0549632	0.03125
4.93	8.67	11.52	1.15017	2.02271	2.68762	0.268192	0.471648	0.626688			4.43	4.99	3.21	18.9884	21.3888	13.7591	81.4338	91.7279	59.0074	0.0814338	0.0917279	0.0590074
8.19	24.77	29.38	1.91073	5.77884	6.85435	0.445536	1.34749	1.59827			1.91	1.55	1.46	8.18688	6.64381	6.25804	35.1103	28.4926	26.8382	0.0351103	0.0284926	0.0268382
						0	0	0			2.28	2.92	5.71	9.77282	12.5161	24.4749	41.9118	53.6765	104.963	0.0419118	0.0536765	0.104963
5.44	11.46	13.25	1.26915	2.67362	3.09123	0.295936	0.623424	0.7208			3.37	2.94	2.8	14.4449	12.6018	12.0017	61.9485	54.0441	51.4706	0.0619485	0.0540441	0.0514706
2.88	7.81	14.26	0.671904	1.82207	3.32686	0.156672	0.424864	0.775744			4.76	9.64	6.62	20.4029	41.3202	28.3755	87.5	177.206	121.691	0.0875	0.177206	0.121691
0	14.13	20.27	0	3.29653	4.72899	0	0.768672	1.10269			0	1.87	1.37	0	8.01543	5.87227	0	34.375	25.1838	0	0.034375	0.0251838
3.7	8.85	14.55	0.86321	2.06471	3.39452	0.20128	0.48144	0.79152			4.21	3.47	2.31	18.0454	14.8736	9.90141	77.3897	63.7868	42.4632	0.0773897	0.0637868	0.0424632
4.58	13.74	17.29	1.06851	3.20554	4.03376	0.249152	0.747456	0.940576			2.72	3.25	3.18	11.6588	13.9306	13.6305	50	59.7426	58.4559	0.05	0.0597426	0.0584559
3.06	7.3	7.39	0.713898	1.70309	1.72409	0.166464	0.39712	0.402016			6.8	8.29	9.36	29.147	35.5336	40.12	125	152.39	172.059	0.125	0.15239	0.172059
11.1	11.96	18.57	2.58963	2.79027	4.33238	0.60384	0.650624	1.01021			10.36	8.18	5.84	44.4063	35.0622	25.0321	190.441	150.368	107.353	0.190441	0.150368	0.107353
8.02	9.74	15.61	1.87107	2.27234	3.64181	0.436288	0.529856	0.849184			12.91	8.63	8.07	55.3365	36.991	34.5907	237.316	158.64	148.346	0.237316	0.15864	0.148346
5	10	11	1.1665	2.333	2.5663	0.272	0.544	0.5984			11.04	10.88	7.96	47.321	46.6352	34.1192	202.941	200	146.324	0.202941	0.2	0.146324
8	16	24	1.8664	3.7328	5.5992	0.4352	0.8704	1.3056			1.73	2.08	1.73	7.41535	8.91556	7.41535	31.8015	38.2353	31.8015	0.0318015	0.0382353	0.0318015
12	22	21	2.7996	5.1326	4.8993	0.6528	1.1968	1.1424			4.36	3.27	3.27	18.6884	14.0163	14.0163	80.1471	60.1103	60.1103	0.0801471	0.0601103	0.0601103
2	8	11	0.4666	1.8664	2.5663	0.1088	0.4352	0.5984			1.84	8.92	7.53	7.88684	38.234	32.276	33.8235	163.971	138.419	0.0338235	0.163971	0.138419
2	11	14	0.4666	2.5663	3.2662	0.1088	0.5984	0.7616			2.77	6.14	4.12	11.8731	26.318	17.6597	50.9191	112.868	75.7353	0.0509191	0.112868	0.0757353
1	12	14	0.2333	2.7996	3.2662	0.0544	0.6528	0.7616			0.36	1.78	1.25	1.54308	7.62966	5.35791	6.61765	32.7206	22.9779	0.00661765	0.0327206	0.0229779
1	3	5	0.2333	0.6999	1.1665	0.0544	0.1632	0.272			0.11	0.22	0.66	0.471496	0.942992	2.82898	2.02206	4.04412	12.1324	0.00202206	0.00404412	0.0121324
9	15	15	2.0997	3.4995	3.4995	0.4896	0.816	0.816			10.6	8.36	6.32	45.4351	35.8337	27.0896	194.853	153.676	116.176	0.194853	0.153676	0.116176
11	19	19	2.5663	4.4327	4.4327	0.5984	1.0336	1.0336			4.78	3.05	3.15	20.4886	13.0733	13.5019	87.8676	56.0662	57.9044	0.0878676	0.0560662	0.0579044
4	10	12	0.9332	2.333	2.7996	0.2176	0.544	0.6528			3.61	2.15	1.86	15.4736	9.2156	7.97257	66.3603	39.5221	34.1912	0.0663603	0.0395221	0.0341912
7	10	13	1.6331	2.333	3.0329	0.3808	0.544	0.7072			13.06	10.58	6.01	55.9794	45.3493	25.7608	240.074	194.485	110.478	0.240074	0.194485	0.110478
7	23	22	1.6331	5.3659	5.1326	0.3808	1.2512	1.1968			3.11	3.6	2.61	13.3305	15.4308	11.1873	57.1691	66.1765	47.9779	0.0571691	0.0661765	0.0479779
13	15	26	3.0329	3.4995	6.0658	0.7072	0.816	1.4144			3.23	3.82	2.63	13.8448	16.3738	11.273	59.375	70.2206	48.3456	0.059375	0.0702206	0.0483456
2	14	15	0.4666	3.2662	3.4995	0.1088	0.7616	0.816			3.58	1.79	1.61	15.345	7.67252	6.90099	65.8088	32.9044	29.5956	0.0658088	0.0329044	0.0295956
11	14	23	2.5663	3.2662	5.3659	0.5984	0.7616	1.2512			5.37	4.3	2.74	23.0176	18.4312	11.7445	98.7132	79.0441	50.3676	0.0987132	0.0790441	0.0503676
12	22	24	2.7996	5.1326	5.5992	0.6528	1.1968	1.3056			5.18	3.11	2.28	22.2032	13.3305	9.77282	95.2206	57.1691	41.9118	0.0952206	0.0571691	0.0419118
11	18	19	2.5663	4.1994	4.4327	0.5984	0.9792	1.0336			6.17	4.28	3.55	26.4466	18.3455	15.2165	113.419	78.6765	65.2574	0.113419	0.0786765	0.0652574

## Sheet: EDF4F
FRAP in cell deltaNLS time 0 and 24h
tDHT=0h					tDHT=24h
time (s)	fluorescence mean	fluorescence std			time (s)	fluorescence mean	fluorescence std
-3.6	0.98755	0.0084916			-3.6	0.98655	0.0079145
-3.42	0.98972	0.012142			-3.42	0.99226	0.0091839
-3.24	0.99575	0.0085353			-3.24	0.99818	0.0099664
-3.06	0.99536	0.011356			-3.06	0.99602	0.0069728
-2.88	0.9977	0.0091676			-2.88	0.99776	0.0050509
-2.7	1.0007	0.0096527			-2.7	1.0008	0.0056767
-2.52	1.0027	0.012127			-2.52	1.0012	0.0049413
-2.34	0.99996	0.0071517			-2.34	0.99962	0.0086399
-2.16	0.99812	0.0090292			-2.16	1.0037	0.009517
-1.98	0.99544	0.010601			-1.98	1.0051	0.0082463
-1.8	1.0023	0.010094			-1.8	1.0055	0.0077313
-1.62	1.0028	0.012599			-1.62	1.0064	0.0087182
-1.44	0.99834	0.011152			-1.44	1.0038	0.008481
-1.26	1.0029	0.010439			-1.26	1.0038	0.0061495
-1.08	1.0036	0.012632			-1.08	1.0016	0.0074852
-0.9	1.0067	0.0085704			-0.9	0.99933	0.0078945
-0.72	1.0022	0.012322			-0.72	1.0005	0.0092768
-0.54	1.0024	0.014573			-0.54	0.99823	0.011019
-0.36	1.0092	0.012862			-0.36	0.99864	0.0098839
-0.18	1.0083	0.012461			-0.18	1.002	0.0089768
0	0.40114	0.11951			0	0.26857	0.075098
0.18	0.44458	0.11755			0.18	0.29945	0.079513
0.36	0.49041	0.11421			0.36	0.33537	0.085976
0.54	0.52392	0.11307			0.54	0.36513	0.091794
0.72	0.55382	0.10994			0.72	0.38906	0.094958
0.9	0.5807	0.10915			0.9	0.41338	0.10195
1.08	0.60023	0.10804			1.08	0.433	0.10529
1.26	0.61537	0.10989			1.26	0.45549	0.10855
1.44	0.63177	0.10466			1.44	0.47181	0.11406
1.62	0.64758	0.1045			1.62	0.48943	0.11507
1.8	0.66451	0.10501			1.8	0.50267	0.11611
1.98	0.68059	0.10456			1.98	0.51594	0.11923
2.16	0.69327	0.1036			2.16	0.53159	0.1241
2.34	0.70467	0.10328			2.34	0.54218	0.12354
2.52	0.71586	0.099554			2.52	0.55549	0.12602
2.7	0.72435	0.10037			2.7	0.56738	0.12837
2.88	0.73323	0.097351			2.88	0.57643	0.12954
3.06	0.73906	0.097671			3.06	0.58764	0.12986
3.24	0.74477	0.096105			3.24	0.59428	0.13154
3.42	0.75296	0.096861			3.42	0.60645	0.1324
3.6	0.75979	0.094365			3.6	0.61364	0.13409
3.78	0.76759	0.090062			3.78	0.62285	0.1336
3.96	0.77411	0.086556			3.96	0.62994	0.13432
4.14	0.77846	0.085949			4.14	0.63848	0.13086
4.32	0.78019	0.083992			4.32	0.64597	0.13303
4.5	0.78763	0.084125			4.5	0.65204	0.13313
4.68	0.79294	0.081785			4.68	0.65845	0.13148
4.86	0.79775	0.083752			4.86	0.66754	0.12979
5.04	0.79658	0.082587			5.04	0.6755	0.12999
5.22	0.80372	0.081936			5.22	0.68265	0.1301
5.4	0.80806	0.079216			5.4	0.68688	0.1281
5.58	0.81177	0.078771			5.58	0.69652	0.12673
5.76	0.81603	0.077068			5.76	0.69893	0.12724
5.94	0.81906	0.07586			5.94	0.70436	0.12879
6.12	0.82273	0.078819			6.12	0.70749	0.12789
6.3	0.82512	0.072755			6.3	0.71242	0.1256
6.48	0.82401	0.074565			6.48	0.71839	0.12396
6.66	0.82926	0.076608			6.66	0.72282	0.12065
6.84	0.83115	0.074907			6.84	0.72949	0.12396
7.02	0.83533	0.074021			7.02	0.73358	0.12243
7.2	0.84032	0.07351			7.2	0.73887	0.1225
7.38	0.84365	0.075548			7.38	0.74406	0.12343
7.56	0.8406	0.075344			7.56	0.74952	0.1253
7.74	0.84364	0.072288			7.74	0.75114	0.1237
7.92	0.84942	0.072662			7.92	0.75123	0.12217
8.1	0.85433	0.075829			8.1	0.75423	0.12219
8.28	0.85396	0.07424			8.28	0.754	0.1248
8.46	0.85435	0.074898			8.46	0.75508	0.12022
8.64	0.85764	0.073035			8.64	0.76083	0.12333
8.82	0.8636	0.074643			8.82	0.76712	0.1218
9	0.86341	0.067521			9	0.77144	0.12296
9.18	0.8682	0.068218			9.18	0.77361	0.12189
9.36	0.86876	0.069079			9.36	0.77873	0.12277
9.54	0.87336	0.062663			9.54	0.7832	0.12077
9.72	0.87383	0.06365			9.72	0.78613	0.12411
9.9	0.87655	0.060223			9.9	0.78756	0.12769
10.08	0.87819	0.061403			10.08	0.7917	0.12689
10.26	0.87981	0.060657			10.26	0.79394	0.12871
10.44	0.87951	0.060468			10.44	0.79379	0.12554
10.62	0.88511	0.064748			10.62	0.80058	0.1274
10.8	0.88311	0.063904			10.8	0.79795	0.12544
10.98	0.88467	0.061848			10.98	0.80155	0.12642
11.16	0.88701	0.063371			11.16	0.80564	0.12346
11.34	0.8896	0.064147			11.34	0.80572	0.12583
11.52	0.89047	0.062765			11.52	0.81146	0.12798
11.7	0.89316	0.061881			11.7	0.80929	0.12738
11.88	0.89495	0.063034			11.88	0.81388	0.12664
12.06	0.89172	0.060381			12.06	0.8141	0.12886
12.24	0.89276	0.061045			12.24	0.81993	0.12665
12.42	0.89425	0.059784			12.42	0.82177	0.12769
12.6	0.89662	0.05879			12.6	0.82302	0.12755
12.78	0.89651	0.061296			12.78	0.82471	0.12817
12.96	0.89692	0.061271			12.96	0.82684	0.12672
13.14	0.89703	0.059559			13.14	0.82516	0.12709
13.32	0.89712	0.059287			13.32	0.82547	0.12709
13.5	0.90087	0.05881			13.5	0.82723	0.125
13.68	0.90437	0.059604			13.68	0.83237	0.12813
13.86	0.90407	0.06027			13.86	0.83318	0.12718
14.04	0.90757	0.065579			14.04	0.83681	0.12671
14.22	0.90911	0.064005			14.22	0.83828	0.12506
14.4	0.91062	0.063458			14.4	0.84098	0.12169
14.58	0.91396	0.064161			14.58	0.84377	0.12368
14.76	0.91429	0.063006			14.76	0.84543	0.12277
14.94	0.91551	0.065713			14.94	0.84478	0.12398
15.12	0.91345	0.062258			15.12	0.84831	0.1252
15.3	0.91401	0.058458			15.3	0.85188	0.12647
15.48	0.91757	0.062222			15.48	0.85213	0.12466
15.66	0.91661	0.060415			15.66	0.8524	0.12388
15.84	0.91805	0.063364			15.84	0.85633	0.12729
16.02	0.91818	0.062651			16.02	0.85339	0.12741
16.2	0.921	0.060303			16.2	0.85315	0.1282
16.38	0.91727	0.058808			16.38	0.85381	0.12799
16.56	0.9212	0.057839			16.56	0.85388	0.12689
16.74	0.92668	0.060645			16.74	0.85682	0.1299
16.92	0.92432	0.062151			16.92	0.85827	0.12726
17.1	0.92886	0.065421			17.1	0.86067	0.12871
17.28	0.92632	0.063698			17.28	0.86083	0.13017
17.46	0.9266	0.063844			17.46	0.86344	0.12747
17.64	0.92123	0.061744			17.64	0.86362	0.12706
17.82	0.92271	0.063594			17.82	0.86399	0.12645
18	0.92753	0.064915			18	0.86255	0.12775
18.18	0.93211	0.064377			18.18	0.86526	0.1299
18.36	0.93294	0.060419			18.36	0.86463	0.12926
18.54	0.9345	0.05944			18.54	0.86852	0.13057
18.72	0.92971	0.057472			18.72	0.86693	0.13066
18.9	0.93266	0.062329			18.9	0.87215	0.12978
19.08	0.93113	0.060219			19.08	0.87579	0.13038
19.26	0.93732	0.062002			19.26	0.87751	0.13318
19.44	0.93687	0.064949			19.44	0.87778	0.1345
19.62	0.93783	0.065665			19.62	0.87793	0.1328
19.8	0.93644	0.066558			19.8	0.8812	0.13231
19.98	0.93728	0.063577			19.98	0.88308	0.12938
20.16	0.93998	0.067519			20.16	0.88589	0.13023
20.34	0.94185	0.065595			20.34	0.88539	0.12999
20.52	0.94103	0.066319			20.52	0.88781	0.13109
20.7	0.94171	0.065105			20.7	0.88646	0.13213
20.88	0.93972	0.065246			20.88	0.88589	0.13173
21.06	0.94357	0.06683			21.06	0.8859	0.13176
21.24	0.94107	0.06885			21.24	0.88778	0.13039
21.42	0.94272	0.067984			21.42	0.89148	0.13377
21.6	0.94319	0.071424			21.6	0.88827	0.13027
21.78	0.94435	0.068963			21.78	0.89048	0.12836
21.96	0.94482	0.068855			21.96	0.88916	0.12852
22.14	0.94781	0.070038			22.14	0.89017	0.1272
22.32	0.9416	0.068992			22.32	0.89091	0.12928
22.5	0.9437	0.069716			22.5	0.89332	0.12883
22.68	0.94768	0.073427			22.68	0.89147	0.12847
22.86	0.94749	0.07075			22.86	0.8916	0.12543
23.04	0.94779	0.070268			23.04	0.89485	0.12828
23.22	0.95008	0.072186			23.22	0.89258	0.12771
23.4	0.9505	0.072814			23.4	0.89487	0.12678
23.58	0.94787	0.068709			23.58	0.89624	0.12665
23.76	0.95005	0.071941			23.76	0.89597	0.12609
23.94	0.95169	0.072949			23.94	0.89333	0.12727
24.12	0.95204	0.072143			24.12	0.89533	0.12915
24.3	0.95138	0.072987			24.3	0.89518	0.13162
24.48	0.95303	0.073155			24.48	0.89494	0.12942
24.66	0.95184	0.072272			24.66	0.89673	0.12842
24.84	0.95077	0.07063			24.84	0.89634	0.12906
25.02	0.95244	0.0719			25.02	0.89619	0.12926
25.2	0.95473	0.072321			25.2	0.89659	0.13207
25.38	0.95763	0.073103			25.38	0.8981	0.13348
25.56	0.95363	0.078984			25.56	0.90021	0.13375
25.74	0.95339	0.082797			25.74	0.90252	0.13379
25.92	0.95185	0.076709			25.92	0.9028	0.1325
26.1	0.95315	0.075115			26.1	0.90466	0.13176
26.28	0.95938	0.074288			26.28	0.90605	0.13157
26.46	0.95935	0.080496			26.46	0.90363	0.12858
26.64	0.95801	0.074107			26.64	0.90205	0.12817
26.82	0.96369	0.077093			26.82	0.90416	0.13061
27	0.96181	0.078567			27	0.90345	0.12906
27.18	0.96238	0.07566			27.18	0.90522	0.12658
27.36	0.9657	0.077144			27.36	0.90242	0.12496
27.54	0.96413	0.077779			27.54	0.90486	0.12778
27.72	0.9668	0.075669			27.72	0.90535	0.13125
27.9	0.96784	0.076293			27.9	0.90553	0.12964
28.08	0.96848	0.077298			28.08	0.90569	0.12726
28.26	0.96835	0.073252			28.26	0.90924	0.12929
28.44	0.96755	0.07682			28.44	0.91004	0.13322
28.62	0.96693	0.077314			28.62	0.91082	0.12979
28.8	0.96989	0.079127			28.8	0.91125	0.13406
28.98	0.96578	0.075314			28.98	0.91064	0.13162
29.16	0.96884	0.076944			29.16	0.91018	0.12908
29.34	0.96886	0.073009			29.34	0.91416	0.13151
29.52	0.9681	0.071815			29.52	0.9127	0.12782
29.7	0.96829	0.070605			29.7	0.91186	0.12756
29.88	0.97275	0.072845			29.88	0.91076	0.12796
30.06	0.97063	0.077449			30.06	0.91313	0.12676
30.24	0.96855	0.074964			30.24	0.91465	0.13018
30.42	0.97121	0.077922			30.42	0.91648	0.12958
30.6	0.97189	0.076465			30.6	0.91752	0.12837
30.78	0.97498	0.079093			30.78	0.91558	0.1309
30.96	0.97225	0.078322			30.96	0.91558	0.12861
31.14	0.97573	0.075287			31.14	0.91499	0.12892
31.32	0.97184	0.07578			31.32	0.91308	0.12822
31.5	0.97272	0.075016			31.5	0.91584	0.12991
31.68	0.97492	0.075541			31.68	0.9129	0.13076
31.86	0.97495	0.075474			31.86	0.91683	0.13195
32.04	0.97031	0.075052			32.04	0.91427	0.1314
32.22	0.97308	0.076951			32.22	0.92042	0.13084
32.4	0.97147	0.075227			32.4	0.91956	0.13061
32.58	0.97569	0.074479			32.58	0.9202	0.13259
32.76	0.97148	0.073037			32.76	0.92167	0.13043
32.94	0.97259	0.075143			32.94	0.92314	0.131
33.12	0.97639	0.074677			33.12	0.92689	0.13304
33.3	0.9688	0.077857			33.3	0.9258	0.1328
33.48	0.96959	0.076201			33.48	0.92395	0.13278
33.66	0.97273	0.077394			33.66	0.92459	0.13389
33.84	0.97066	0.077429			33.84	0.92386	0.1345
34.02	0.97239	0.076408			34.02	0.92509	0.13422
34.2	0.9745	0.074231			34.2	0.92564	0.13496
34.38	0.9719	0.07613			34.38	0.9236	0.13191
34.56	0.97277	0.075775			34.56	0.92189	0.13265
34.74	0.97673	0.077976			34.74	0.92131	0.13175
34.92	0.9792	0.07556			34.92	0.92092	0.13201
35.1	0.97632	0.076804			35.1	0.92201	0.13189
35.28	0.97749	0.078865			35.28	0.92325	0.12975
35.46	0.9787	0.079958			35.46	0.92373	0.13159
35.64	0.97754	0.085261			35.64	0.9247	0.1322
35.82	0.97421	0.08148			35.82	0.92571	0.12962

## Sheet: EDF4G
Tau1 Tau5 droplet count
	px			um			um2*1000			um2
	5	15	30	5	15	30	5	15	30	5	15	30
dNLS	4.52	3.79	2.91	19.3742	16.2452	12.4732	83.0882	69.6691	53.4926	0.0830882	0.0696691	0.0534926
	10.09	9.74	9.74	43.249	41.7488	41.7488	185.478	179.044	179.044	0.185478	0.179044	0.179044
	9.67	7.37	6.6	41.4488	31.5902	28.2898	177.757	135.478	121.324	0.177757	0.135478	0.121324
	4.47	7.09	6.83	19.1599	30.3901	29.2756	82.1691	130.331	125.551	0.0821691	0.130331	0.125551
	3.31	2.61	3.66	14.1877	11.1873	15.688	60.8456	47.9779	67.2794	0.0608456	0.0479779	0.0672794
	1.41	2.73	1.21	6.04372	11.7017	5.18646	25.9191	50.1838	22.2426	0.0259191	0.0501838	0.0222426
	2.03	1.32	1.42	8.70124	5.65795	6.08658	37.3162	24.2647	26.1029	0.0373162	0.0242647	0.0261029
	2.09	1.59	1.1	8.95842	6.81526	4.71496	38.4191	29.2279	20.2206	0.0384191	0.0292279	0.0202206
	5.95	3.54	2.85	25.5036	15.1736	12.216	109.375	65.0735	52.3897	0.109375	0.0650735	0.0523897
	9.57	7.98	4.43	41.0201	34.2049	18.9884	175.919	146.691	81.4338	0.175919	0.146691	0.0814338
	7.77	3.68	7.57	33.3048	15.7737	32.4475	142.831	67.6471	139.154	0.142831	0.0676471	0.139154
	10.83	5.7	4.84	46.4209	24.4321	20.7458	199.081	104.779	88.9706	0.199081	0.104779	0.0889706
	4.71	3.08	3.08	20.1886	13.2019	13.2019	86.5809	56.6176	56.6176	0.0865809	0.0566176	0.0566176
	10.2	8.92	3.61	43.7205	38.234	15.4736	187.5	163.971	66.3603	0.1875	0.163971	0.0663603
	9.07	6.1	4.54	38.877	26.1466	19.4599	166.728	112.132	83.4559	0.166728	0.112132	0.0834559
	1.14	1.02	1.02	4.88641	4.37205	4.37205	20.9559	18.75	18.75	0.0209559	0.01875	0.01875
	6.04	5.68	4.8	25.8894	24.3463	20.5744	111.029	104.412	88.2353	0.111029	0.104412	0.0882353
	6.22	6.69	4.51	26.661	28.6755	19.3313	114.338	122.978	82.9044	0.114338	0.122978	0.0829044
	4.87	7.87	4.12	20.8744	33.7334	17.6597	89.5221	144.669	75.7353	0.0895221	0.144669	0.0757353
	0	6.31	5.93	0	27.0467	25.4179	0	115.993	109.007	0	0.115993	0.109007
	7.79	9.24	5.48	33.3905	39.6057	23.4891	143.199	169.853	100.735	0.143199	0.169853	0.100735
	9.92	7.93	8.18	42.5204	33.9906	35.0622	182.353	145.772	150.368	0.182353	0.145772	0.150368
	1.45	1.88	1.45	6.21517	8.05829	6.21517	26.6544	34.5588	26.6544	0.0266544	0.0345588	0.0266544
	7.29	5.12	3.81	31.2473	21.946	16.3309	134.007	94.1176	70.0368	0.134007	0.0941176	0.0700368
	3.81	3.81	2.49	16.3309	16.3309	10.673	70.0368	70.0368	45.7721	0.0700368	0.0700368	0.0457721
	0	1.93	2.15	0	8.27261	9.2156	0	35.4779	39.5221	0	0.0354779	0.0395221
	0	1.73	1.08	0	7.41535	4.62923	0	31.8015	19.8529	0	0.0318015	0.0198529
	4.08	2.49	1.92	17.4882	10.673	8.22975	75	45.7721	35.2941	0.075	0.0457721	0.0352941
Tau1	2.95	3.84	2.43	12.6447	16.4595	10.4158	54.2279	70.5882	44.6691	0.0542279	0.0705882	0.0446691
	1.34	3.84	4.34	5.74368	16.4595	18.6027	24.6324	70.5882	79.7794	0.0246324	0.0705882	0.0797794
	6.4	3.63	1.49	27.4325	15.5594	6.38663	117.647	66.7279	27.3897	0.117647	0.0667279	0.0273897
	1.81	2.77	4.1	7.75825	11.8731	17.5739	33.2721	50.9191	75.3676	0.0332721	0.0509191	0.0753676
	3.84	5.48	3.02	16.4595	23.4891	12.9447	70.5882	100.735	55.5147	0.0705882	0.100735	0.0555147
	1.85	3.87	1.51	7.9297	16.5881	6.47235	34.0074	71.1397	27.7574	0.0340074	0.0711397	0.0277574
	0	2.51	2.34	0	10.7587	10.03	0	46.1397	43.0147	0	0.0461397	0.0430147
	0	4.8	2	0	20.5744	8.57265	0	88.2353	36.7647	0	0.0882353	0.0367647
	6.93	8.32	3.47	29.7042	35.6622	14.8736	127.39	152.941	63.7868	0.12739	0.152941	0.0637868
	4.23	2.69	5.39	18.1312	11.5302	23.1033	77.7574	49.4485	99.0809	0.0777574	0.0494485	0.0990809
	2.08	2.3	2.74	8.91556	9.85855	11.7445	38.2353	42.2794	50.3676	0.0382353	0.0422794	0.0503676
	4.86	2.49	1.66	20.8315	10.673	7.1153	89.3382	45.7721	30.5147	0.0893382	0.0457721	0.0305147
	3.56	1.57	1.28	15.2593	6.72953	5.4865	65.4412	28.8603	23.5294	0.0654412	0.0288603	0.0235294
	1.86	2.31	2.13	7.97257	9.90141	9.12988	34.1912	42.4632	39.1544	0.0341912	0.0424632	0.0391544
	2.06	3.54	4.42	8.82983	15.1736	18.9456	37.8676	65.0735	81.25	0.0378676	0.0650735	0.08125
	6.64	5.73	8.73	28.4612	24.5607	37.4196	122.059	105.331	160.478	0.122059	0.105331	0.160478
	8.94	4.62	3.32	38.3198	19.8028	14.2306	164.338	84.9265	61.0294	0.164338	0.0849265	0.0610294
	6.29	3.42	7.68	26.961	14.6592	32.919	115.625	62.8676	141.176	0.115625	0.0628676	0.141176
	4.7	4.24	3.79	20.1457	18.174	16.2452	86.3971	77.9412	69.6691	0.0863971	0.0779412	0.0696691
	0	1.81	1.81	0	7.75825	7.75825	0	33.2721	33.2721	0	0.0332721	0.0332721
	4.31	2.64	2.02	18.4741	11.3159	8.65838	79.2279	48.5294	37.1324	0.0792279	0.0485294	0.0371324
	5.75	3.91	3.26	24.6464	16.7595	13.9734	105.699	71.875	59.9265	0.105699	0.071875	0.0599265
Tau5	0	0	0.91	0	0	3.90056	0	0	16.7279	0	0	0.0167279
	0	1.61	2.25	0	6.90099	9.64423	0	29.5956	41.3603	0	0.0295956	0.0413603
	0	2.04	2.4	0	8.74411	10.2872	0	37.5	44.1176	0	0.0375	0.0441176
	0	3.73	2.85	0	15.988	12.216	0	68.5662	52.3897	0	0.0685662	0.0523897
	0	0	2.12	0	0	9.08701	0	0	38.9706	0	0	0.0389706
	0	2.08	3.93	0	8.91556	16.8453	0	38.2353	72.2426	0	0.0382353	0.0722426
	1.16	2.33	1.99	4.97214	9.98714	8.52979	21.3235	42.8309	36.5809	0.0213235	0.0428309	0.0365809
	0	0	1.28	0	0	5.4865	0	0	23.5294	0	0	0.0235294
	0	0	4.43	0	0	18.9884	0	0	81.4338	0	0	0.0814338
	5.33	3.11	3.11	22.8461	13.3305	13.3305	97.9779	57.1691	57.1691	0.0979779	0.0571691	0.0571691
	0	0	0.47	0	0	2.01457	0	0	8.63971	0	0	0.00863971
	0	1.14	1.42	0	4.88641	6.08658	0	20.9559	26.1029	0	0.0209559	0.0261029
	0	0.73	2.18	0	3.12902	9.34419	0	13.4191	40.0735	0	0.0134191	0.0400735
	0	1.59	2.18	0	6.81526	9.34419	0	29.2279	40.0735	0	0.0292279	0.0400735
	0	2.28	1.48	0	9.77282	6.34376	0	41.9118	27.2059	0	0.0419118	0.0272059
	0	4.72	2.56	0	20.2315	10.973	0	86.7647	47.0588	0	0.0867647	0.0470588
	0	2.53	5.06	0	10.8444	21.6888	0	46.5074	93.0147	0	0.0465074	0.0930147
	5.88	3.04	1.62	25.2036	13.0304	6.94385	108.088	55.8824	29.7794	0.108088	0.0558824	0.0297794
	0	4.83	5.05	0	20.703	21.6459	0	88.7868	92.8309	0	0.0887868	0.0928309
	0	3.71	5.27	0	15.9023	22.5889	0	68.1985	96.875	0	0.0681985	0.096875
	8.88	9.84	7.68	38.0626	42.1775	32.919	163.235	180.882	141.176	0.163235	0.180882	0.141176
	0	0.52	1.2	0	2.22889	5.14359	0	9.55882	22.0588	0	0.00955882	0.0220588
	6.81	4.29	3.25	29.1899	18.3883	13.9306	125.184	78.8603	59.7426	0.125184	0.0788603	0.0597426

## Sheet: EDF4I
dFQNLF droplet size
				um			um2
	5	15	30	5	15	30	5	15	30
dNLS	7.83	12.16	20.43	1.82674	2.83693	4.76632	0.425952	0.661504	1.11139
	4.93	8.67	11.52	1.15017	2.02271	2.68762	0.268192	0.471648	0.626688
	8.19	24.77	29.38	1.91073	5.77884	6.85435	0.445536	1.34749	1.59827
	5.44	11.46	13.25	1.26915	2.67362	3.09123	0.295936	0.623424	0.7208
	2.88	7.81	14.26	0.671904	1.82207	3.32686	0.156672	0.424864	0.775744
	0	14.13	20.27	0	3.29653	4.72899	0	0.768672	1.10269
	3.7	8.85	14.55	0.86321	2.06471	3.39452	0.20128	0.48144	0.79152
	4.58	13.74	17.29	1.06851	3.20554	4.03376	0.249152	0.747456	0.940576
	3.06	7.3	7.39	0.713898	1.70309	1.72409	0.166464	0.39712	0.402016
	11.1	11.96	18.57	2.58963	2.79027	4.33238	0.60384	0.650624	1.01021
	8.02	9.74	15.61	1.87107	2.27234	3.64181	0.436288	0.529856	0.849184
	5	10	11	1.1665	2.333	2.5663	0.272	0.544	0.5984
	8	16	24	1.8664	3.7328	5.5992	0.4352	0.8704	1.3056
	12	22	21	2.7996	5.1326	4.8993	0.6528	1.1968	1.1424
	2	8	11	0.4666	1.8664	2.5663	0.1088	0.4352	0.5984
	2	11	14	0.4666	2.5663	3.2662	0.1088	0.5984	0.7616
	1	12	14	0.2333	2.7996	3.2662	0.0544	0.6528	0.7616
	1	3	5	0.2333	0.6999	1.1665	0.0544	0.1632	0.272
	9	15	15				0.4896	0.816	0.816
	11	19	19	2.5663	4.4327	4.4327	0.5984	1.0336	1.0336
	4	10	12	0.9332	2.333	2.7996	0.2176	0.544	0.6528
	7	10	13	1.6331	2.333	3.0329	0.3808	0.544	0.7072
	7	23	22	1.6331	5.3659	5.1326	0.3808	1.2512	1.1968
	13	15	26	3.0329	3.4995	6.0658	0.7072	0.816	1.4144
	2	14	15	0.4666	3.2662	3.4995	0.1088	0.7616	0.816
	11	14	23	2.5663	3.2662	5.3659	0.5984	0.7616	1.2512
	12	22	24	2.7996	5.1326	5.5992	0.6528	1.1968	1.3056
	11	18	19	2.5663	4.1994	4.4327	0.5984	0.9792	1.0336
dFQNLF	1.78	7	11.94	0.415274	1.6331	2.7856	0.096832	0.3808	0.649536
	3.73	8.75	11.21	0.870209	2.04137	2.61529	0.202912	0.476	0.609824
	0	0	2.77	0	0	0.646241	0	0	0.150688
	2.88	5.39	5.81	0.671904	1.25749	1.35547	0.156672	0.293216	0.316064
	0	1	3.33	0	0.2333	0.776889	0	0.0544	0.181152
	0	3.82	4	0	0.891206	0.9332	0	0.207808	0.2176
	0	5.7	8.11	0	1.32981	1.89206	0	0.31008	0.441184
	0	4	2	0	0.9332	0.4666	0	0.2176	0.1088
	2	7	7	0.4666	1.6331	1.6331	0.1088	0.3808	0.3808
	1	3	3	0.2333	0.6999	0.6999	0.0544	0.1632	0.1632
	5	7	10	1.1665	1.6331	2.333	0.272	0.3808	0.544
	1	5	8	0.2333	1.1665	1.8664	0.0544	0.272	0.4352
	4	5	9	0.9332	1.1665	2.0997	0.2176	0.272	0.4896
	5	8	11	1.1665	1.8664	2.5663	0.272	0.4352	0.5984
	6	9	13	1.3998	2.0997	3.0329	0.3264	0.4896	0.7072
	5	6	7	1.1665	1.3998	1.6331	0.272	0.3264	0.3808
	2	3	3	0.4666	0.6999	0.6999	0.1088	0.1632	0.1632
	2	2	5	0.4666	0.4666	1.1665	0.1088	0.1088	0.272
	1	3	3	0.2333	0.6999	0.6999	0.0544	0.1632	0.1632
	3	4	4	0.6999	0.9332	0.9332	0.1632	0.2176	0.2176
	2	3	3	0.4666	0.6999	0.6999	0.1088	0.1632	0.1632
	1	3	4	0.2333	0.6999	0.9332	0.0544	0.1632	0.2176
	1	2	2	0.2333	0.4666	0.4666	0.0544	0.1088	0.1088

## Sheet: EDF4J
dFQNLF droplet count
	px			um			um2*1000			um2
	5	15	30	5	15	30	5	15	30	5	15	30
dNLS	4.43	4.99	3.21	18.9884	21.3888	13.7591	81.4338	91.7279	59.0074	0.0814338	0.0917279	0.0590074
	1.91	1.55	1.46	8.18688	6.64381	6.25804	35.1103	28.4926	26.8382	0.0351103	0.0284926	0.0268382
	2.28	2.92	5.71	9.77282	12.5161	24.4749	41.9118	53.6765	104.963	0.0419118	0.0536765	0.104963
	3.37	2.94	2.8	14.4449	12.6018	12.0017	61.9485	54.0441	51.4706	0.0619485	0.0540441	0.0514706
	4.76	9.64	6.62	20.4029	41.3202	28.3755	87.5	177.206	121.691	0.0875	0.177206	0.121691
	0	1.87	1.37	0	8.01543	5.87227	0	34.375	25.1838	0	0.034375	0.0251838
	4.21	3.47	2.31	18.0454	14.8736	9.90141	77.3897	63.7868	42.4632	0.0773897	0.0637868	0.0424632
	2.72	3.25	3.18	11.6588	13.9306	13.6305	50	59.7426	58.4559	0.05	0.0597426	0.0584559
	6.8	8.29	9.36	29.147	35.5336	40.12	125	152.39	172.059	0.125	0.15239	0.172059
	10.36	8.18	5.84	44.4063	35.0622	25.0321	190.441	150.368	107.353	0.190441	0.150368	0.107353
	12.91	8.63	8.07	55.3365	36.991	34.5907	237.316	158.64	148.346	0.237316	0.15864	0.148346
	11.04	10.88	7.96	47.321	46.6352	34.1192	202.941	200	146.324	0.202941	0.2	0.146324
	1.73	2.08	1.73	7.41535	8.91556	7.41535	31.8015	38.2353	31.8015	0.0318015	0.0382353	0.0318015
	4.36	3.27	3.27	18.6884	14.0163	14.0163	80.1471	60.1103	60.1103	0.0801471	0.0601103	0.0601103
	1.84	8.92	7.53	7.88684	38.234	32.276	33.8235	163.971	138.419	0.0338235	0.163971	0.138419
	2.77	6.14	4.12	11.8731	26.318	17.6597	50.9191	112.868	75.7353	0.0509191	0.112868	0.0757353
	0.36	1.78	1.25	1.54308	7.62966	5.35791	6.61765	32.7206	22.9779	0.00661765	0.0327206	0.0229779
	0.11	0.22	0.66	0.471496	0.942992	2.82898	2.02206	4.04412	12.1324	0.00202206	0.00404412	0.0121324
	10.6	8.36	6.32	45.4351	35.8337	27.0896	194.853	153.676	116.176	0.194853	0.153676	0.116176
	4.78	3.05	3.15	20.4886	13.0733	13.5019	87.8676	56.0662	57.9044	0.0878676	0.0560662	0.0579044
	3.61	2.15	1.86	15.4736	9.2156	7.97257	66.3603	39.5221	34.1912	0.0663603	0.0395221	0.0341912
	13.06	10.58	6.01	55.9794	45.3493	25.7608	240.074	194.485	110.478	0.240074	0.194485	0.110478
	3.11	3.6	2.61	13.3305	15.4308	11.1873	57.1691	66.1765	47.9779	0.0571691	0.0661765	0.0479779
	3.23	3.82	2.63	13.8448	16.3738	11.273	59.375	70.2206	48.3456	0.059375	0.0702206	0.0483456
	3.58	1.79	1.61	15.345	7.67252	6.90099	65.8088	32.9044	29.5956	0.0658088	0.0329044	0.0295956
	5.37	4.3	2.74	23.0176	18.4312	11.7445	98.7132	79.0441	50.3676	0.0987132	0.0790441	0.0503676
	5.18	3.11	2.28	22.2032	13.3305	9.77282	95.2206	57.1691	41.9118	0.0952206	0.0571691	0.0419118
	6.17	4.28	3.55	26.4466	18.3455	15.2165	113.419	78.6765	65.2574	0.113419	0.0786765	0.0652574
dFQNLF	0.69	3.06	2.75	2.95757	13.1162	11.7874	12.6838	56.25	50.5515	0.0126838	0.05625	0.0505515
	1.49	2.33	1.88	6.38663	9.98714	8.05829	27.3897	42.8309	34.5588	0.0273897	0.0428309	0.0345588
	0	0	0.89	0	0	3.81483	0	0	16.3603	0	0	0.0163603
	2.14	6.96	7.1	9.17274	29.8328	30.4329	39.3382	127.941	130.515	0.0393382	0.127941	0.130515
	0	0.49	2.04	0	2.1003	8.74411	0	9.00735	37.5	0	0.00900735	0.0375
	0	1.35	1.35	0	5.78654	5.78654	0	24.8162	24.8162	0	0.0248162	0.0248162
	0	2.06	1.86	0	8.82983	7.97257	0	37.8676	34.1912	0	0.0378676	0.0341912
	0	1.07	2.14	0	4.58637	9.17274	0	19.6691	39.3382	0	0.0196691	0.0393382
	0.33	1.67	2.01	1.41449	7.15817	8.61552	6.06618	30.6985	36.9485	0.00606618	0.0306985	0.0369485
	1.72	3.83	4.36	7.37248	16.4166	18.6884	31.6176	70.4044	80.1471	0.0316176	0.0704044	0.0801471
	2.91	2.36	2.21	12.4732	10.1157	9.47278	53.4926	43.3824	40.625	0.0534926	0.0433824	0.040625
	0.7	2.8	2.94	3.00043	12.0017	12.6018	12.8676	51.4706	54.0441	0.0128676	0.0514706	0.0540441
	6.4	11.35	10.73	27.4325	48.6498	45.9923	117.647	208.64	197.243	0.117647	0.20864	0.197243
	4.81	5.52	4.27	20.6172	23.6605	18.3026	88.4191	101.471	78.4926	0.0884191	0.101471	0.0784926
	6.65	5.81	5.53	28.5041	24.9036	23.7034	122.243	106.801	101.654	0.122243	0.106801	0.101654
	6.52	7.18	7.56	27.9468	30.7758	32.4046	119.853	131.985	138.971	0.119853	0.131985	0.138971
	2.91	4.26	6.13	12.4732	18.2598	26.2752	53.4926	78.3088	112.684	0.0534926	0.0783088	0.112684
	1.51	2.57	2.72	6.47235	11.0159	11.6588	27.7574	47.2426	50	0.0277574	0.0472426	0.05
	5.57	5.02	6.13	23.8748	21.5174	26.2752	102.39	92.2794	112.684	0.10239	0.0922794	0.112684
	2.62	6.07	8.34	11.2302	26.018	35.748	48.1618	111.581	153.309	0.0481618	0.111581	0.153309
	5.57	3.43	7.29	23.8748	14.7021	31.2473	102.39	63.0515	134.007	0.10239	0.0630515	0.134007
	0.72	1.95	3.59	3.08616	8.35834	15.3879	13.2353	35.8456	65.9926	0.0132353	0.0358456	0.0659926
	2.05	4.41	5.19	8.78697	18.9027	22.246	37.6838	81.0662	95.4044	0.0376838	0.0810662	0.0954044
