# Supplementary material for: Rational optimization of a transcription factor activation domain inhibitor
Source: Nat Struct Mol Biol. 2023 Dec 4;30(12):1958–69. doi: 10.1038/s41594-023-01159-5 (PMC10716049; doi:10.1038/s41594-023-01159-5)
Supplement: Supplementary file 23 — Statistical source data. [file 41594_2023_1159_MOESM23_ESM.xlsx]

## Sheet: EDF5A
	3 aa			1 aa			4 aa			2 aa			EPI-002
Conc (uM)	MEAN	SEM	N	MEAN	SEM	N	MEAN	SEM	N	MEAN	SEM	N	MEAN	SEM	N
0	99.9995	6.12807	12	99.8008	6.53611	12	100	3.68518	12	107.137	7.53389	18	100	3.4	6
3.75				64.5841	4.47525	12				67.262	4.97694	12
5	78.8783	6.57347	12				73.0653	2.50155	12	75.6984	14.8555	6	67	2	6
7.5				31.9541	4.32829	12				43.0588	3.9212	12
15	46.9107	2.16795	12	8.81169	4.00953	12	40.4675	3.61886	12	17.0965	3.41775	18	33	2.2	6
35	28.2824	1.97066	12				9.70424	2.13784	12	10.7023	3.75249	6	6.2	0.66	6
[3 aa] uM	LNCaP % Androgen-induced PSA-luciferase Activity (MEANS of 3 technical replicates for an n=12 independent experiments)
0	118.184	119.05	62.7638	141.417	79.797	78.7862	87.0101	103.28	109.705	97.8113	104.45	97.7393
5	53.2971	101.8	103.746	126.061	96.098	63.0963	78.684	56.851	70.2067	64.5703	61.579	70.5499
15	41.1785	48.627	60.6368	57.1124	40.088	42.9109	46.6516	47.535	55.0208	46.6516	35.657	40.8589
35	26.6013	29.931	44.9883	32.4528	18.563	23.1268	24.8112	26.964	33.598	25.594	22.315	30.4435
[1 aa] uM	LNCaP % Androgen-induced PSA-luciferase Activity (MEANS of 3 technical replicates for an n=12 independent experiments)
0	149.785	92.674	57.5409	108.871	97.609	91.1293	125.795	79.951	94.2542	94.9528	103.74	101.307
3.75	63.4244	63.852	42.9797	76.9333	73.858	65.4013	39.0285	62.858	93.8411	53.151	58.936	80.7463
7.5	63.6649	43.282	35.9647	32.3927	32.477	38.5622	9.33856	19.08	8.90465	28.965	31.079	39.739
15	24.3124	24.488	42.3026	2.63219	3.3119	7.30048	-0.64511	-0.3422	0.04366	0.85559	0.7195	0.76124
[4 aa] uM	LNCaP % Androgen-induced PSA-luciferase Activity (MEANS of 3 technical replicates for an n=12 independent experiments)
0	112.419	85.817	101.764	112.103	75.404	112.493	103.989	99.898	96.1124	117.649	94.941	87.4106
5	74.8642	67.645	69.1265	64.5131	59.006	67.3534	80.6329	72.261	78.585	74.4184	75.92	92.4586
15	22.122	68.191	46.8493	21.924	37.301	43.156	32.9497	37.44	45.2904	38.8614	39.676	51.8493
35	18.4581	18.928	24.7233	2.23562	3.7125	5.86931	3.77822	4.4012	5.88641	12.3621	4.9452	11.1509
[2 aa] uM	LNCaP % Androgen-induced PSA-luciferase Activity (MEANS of 3 technical replicates for an n=6, n=12 or n=18 independent experiments)
0	92.1814	228.47	107.819	82.6439	103.91	113.445	88.1124	98.602	113.285	97.2223	120.43	82.3465	99.8127	97.25	102.937	92.3227	103.72	103.954
3.75							52.9805	45.559	52.5754	92.5379	78.661	90.2907	84.9919	73.258	74.8147	45.0065	55.572	60.8965
5	47.46	40.903	41.242	117.629	111.34	95.6162
7.5							35.1588	43.386	23.5956	51.7066	43.881	47.5876	57.597	65.946	57.8938	30.0329	26.48	33.4405
15	10.0896	13.121	61.973	19.9379	37.53	33.586	6.07736	5.5475	9.20581	10.6929	14.657	13.8731	11.9923	11.247	24.1864	5.03288	4.395	14.5915
35	17.263	22.375	16.9563	1.50488	1.9305	4.18385
[EPI-002] uM	LNCaP % Androgen-induced PSA-luciferase Activity (MEANS of 3 technical replicates for an n=6 independent experiments)
0	100	99.9998	100	100.001	100	99.9989
5	75.4306	64.8461	66.3495	71.5009	64.4726	62.0518
15	35.6168	35.7525	37.9799	26.8618	31.6871	29.3651
35	5.65214	2.66449	4.58468	6.29499	7.68171	10.0218

## Sheet: EDF5C
residues	Fraction helix APO	error	Fraction helix EPI-002	error	Fraction helix 1AA	error
391	0	0	0	0	0	0
392	0.047	0.009	0.084	0.018	0.238	0.029
393	0.138	0.014	0.176	0.022	0.534	0.037
394	0.186	0.02	0.209	0.025	0.609	0.036
395	0.302	0.021	0.267	0.025	0.673	0.035
396	0.646	0.028	0.418	0.053	0.763	0.032
397	0.687	0.026	0.464	0.042	0.813	0.028
398	0.695	0.027	0.458	0.043	0.816	0.029
399	0.689	0.023	0.559	0.065	0.842	0.027
400	0.688	0.015	0.559	0.064	0.825	0.028
401	0.663	0.016	0.565	0.061	0.775	0.026
402	0.637	0.021	0.5	0.041	0.726	0.027
403	0.531	0.021	0.417	0.041	0.485	0.027
404	0.173	0.012	0.273	0.052	0.225	0.017
405	0.093	0.016	0.225	0.051	0.139	0.018
406	0.176	0.021	0.323	0.052	0.439	0.025
407	0.186	0.021	0.247	0.032	0.447	0.032
408	0.232	0.022	0.284	0.033	0.553	0.032
409	0.3	0.023	0.346	0.037	0.632	0.027
410	0.319	0.026	0.388	0.037	0.663	0.028
411	0.3	0.025	0.377	0.036	0.638	0.024
412	0.325	0.018	0.352	0.034	0.613	0.024
413	0.253	0.016	0.251	0.031	0.489	0.019
414	0.156	0.021	0.118	0.022	0.194	0.024
415	0.07	0.009	0.084	0.023	0.122	0.013
416	0.041	0.007	0.067	0.024	0.078	0.011
417	0.025	0.007	0.055	0.021	0.056	0.009
418	0.016	0.005	0.027	0.006	0.031	0.004
419	0.018	0.011	0.011	0.001	0.006	0.003
420	0.073	0.015	0.025	0.003	0.015	0.004
421	0.081	0.015	0.032	0.003	0.025	0.005
422	0.069	0.012	0.021	0.003	0.021	0.005
423	0.009	0.002	0.013	0.002	0.012	0.003
424	0	0	0.004	0.002	0.005	0.004
425	0.103	0.01	0.07	0.02	0.14	0.024
426	0.142	0.013	0.078	0.021	0.2	0.024
427	0.183	0.015	0.14	0.022	0.234	0.023
428	0.186	0.015	0.144	0.022	0.225	0.022
429	0.188	0.017	0.121	0.018	0.271	0.031
430	0.201	0.018	0.237	0.022	0.335	0.029
431	0.228	0.026	0.351	0.029	0.493	0.029
432	0.301	0.06	0.392	0.03	0.486	0.019
433	0.416	0.059	0.447	0.032	0.479	0.021
434	0.499	0.062	0.455	0.033	0.527	0.031
435	0.432	0.033	0.428	0.032	0.509	0.03
436	0.35	0.029	0.35	0.033	0.431	0.032
437	0.171	0.024	0.215	0.028	0.312	0.029
438	0.061	0.014	0.094	0.016	0.15	0.016
439	0.052	0.009	0.044	0.005	0.108	0.017
440	0.108	0.012	0.143	0.021	0.234	0.028
441	0.171	0.02	0.193	0.022	0.298	0.027
442	0.171	0.016	0.187	0.022	0.291	0.026
443	0.133	0.019	0.154	0.02	0.177	0.04
444	0.108	0.014	0.114	0.017	0.139	0.026
445	0.033	0.005	0.048	0.008	0.068	0.016
446	0	0	0	0	0	0

## Sheet: EDF5D
Residue Number	Aromatic Stacking Probability EPI-002	error	Aromatic Stacking Probability 1AA	error
390	0	0	0	0
391	0	0	0	0
392	0	0	0	0
393	0.025	0.003	0.106	0.006
394	0	0	0	0
395	0	0	0	0
396	0	0	0	0
397	0.055	0.009	0.261	0.028
398	0	0	0	0
399	0	0	0	0
400	0	0	0	0
401	0	0	0	0
402	0	0	0	0
403	0	0	0	0
404	0	0	0	0
405	0	0	0	0
406	0.033	0.003	0.119	0.019
407	0	0	0	0
408	0	0	0	0
409	0	0	0	0
410	0	0	0	0
411	0	0	0	0
412	0	0	0	0
413	0.019	0.002	0.078	0.01
414	0	0	0	0
415	0	0	0	0
416	0	0	0	0
417	0	0	0	0
418	0	0	0	0
419	0	0	0	0
420	0	0	0	0
421	0	0	0	0
422	0	0	0	0
423	0	0	0	0
424	0	0	0	0
425	0	0	0	0
426	0	0	0	0
427	0	0	0	0
428	0	0	0	0
429	0	0	0	0
430	0	0	0	0
431	0	0	0	0
432	0	0	0	0
433	0.046	0.005	0.212	0.014
434	0.017	0.002	0.084	0.018
435	0	0	0	0
436	0	0	0	0
437	0.035	0.003	0.159	0.022
438	0	0	0	0
439	0	0	0	0
440	0	0	0	0
441	0	0	0	0
442	0	0	0	0
443	0	0	0	0
444	0	0	0	0
445	0.022	0.003	0.042	0.004
446	0	0	0	0
447	0	0	0	0

## Sheet: EDF5F
	V7BS3-luciferase activity (means of 3 technical replicates per independent experiment)																	AVERAGE	STDEV
pcDNA DMSO	0.53	1.28	4.15	1.65	1.81	4.14	2.6	0.77	0.78	11.85	3.92	4.5	9.3	0.9	3.2	13.62	1.63	3.91941	3.95941
AR-V7 DMSO	100	100	100	100	100	100	100	100	100	100	100	100	100	100	100	100	100	100	0
AR-V7 + EPI-002	7.66				14.21	18.17	12.62	20.82				28.74	49.51				19.57	21.4125	12.96
AR-V7 + ENZA	144.51				108.15	99.76	152.41	91.12				108.11	112.71				94.03	113.85	22.6831
AR-V7 + 1ab	178.12	101.93	178.23	185.88	140.61			153.83	145.26	115.46	199.62	168.86	155.14	117.58	187.07	108.22		152.558	32.1386
AR-V7 + 1ae					16.3	1.28	0.22	1.31				74.75	62.47	20.56	21.89	51.95		27.8589	28.2285
AR-V7 + 1af								71.73					70.13	84.19	140.62			91.6675	33.2347
AR-V7 + 1ba	189.78	119.27	81.47	170.09		129	224.51			145.56	209.76		168.24					159.742	45.6741
AR-V7 + 1bb				158.85	108.57					112.33	195.89	125.59						140.246	36.8776

## Sheet: EDF5G
	[1ab](uM)	V7BS3-luciferase activity (means of 3 technical replicates per independent experiment)
PCDNA	0	3.807	3.6565	3.2734	12.9355	9.31	8.93969
ARV-7	0	83.97	101.11	114.92	139.654	60.3456	52.8718
ARV-7	0.1	246.1	167.94	172.13	159.152	84.46	49.0246
ARV-7	1	200.2	181.01	106.91	92.3457	74.26	107.566
ARV-7	2.5	169.5	169.54	201.9	99.0245	134.08	138.86
ARV-7	5	172.8	152.43	221.7	103.73	138.92	81.9951
ARV-7	10	15.17	17.83	22.022

## Sheet: EDF5H
	[1bb](μM)	V7BS3-luciferase activity
PCDNA	0	19.26	18.66	17.57
ARV-7	0	106.08	85.11	108.81
ARV-7	1.093	277.1	249.07	301.32
ARV-7	2.87	327.93	254.64	354.89
ARV-7	4.375	236.48	250.01	293.97
ARV-7	8.75	18.97	14.81	13.88
ARV-7	17.5	0.65	0.6	0.6

## Sheet: EDF5I
	LNCap 95			LNCaP
[1ae] (uM)	MEAN	SEM	N	MEAN	SEM	N		[1ae ] (uM)	LNCaP95 % Activity (means of 3 technical replicates for an n=12 independent experiments)													Conc (uM)	LNCaP % Activity (means of 3 technical replicates for an n=12 independent experiments)
10	2.83	1.03925	12					10	6.96	1.55	4.38	1.29	-1.03	-1.55	8.22	3.62	2.96	8.55	0	-0.99
5	40.8733	3.51282	12	-24.2475	7.42458	12		5	60.05	46.91	51.8	34.28	33.51	54.38	35.53	53.29	34.21	28.95	19.74	37.83		5	-21.82	-13.93	-32.22	19.3	19.51	-41.2	-39.38	-48.23	-65.86	-18.29	-39.1	-9.75
2.5	79.4317	5.1859	12	48.7225	11.058	12		2.5	96.91	98.97	80.93	97.94	98.97	69.59	79.61	82.57	72.04	58.88	40.13	76.64		2.5	-1.09	57.22	90.52	104.66	75.69	68.92	83.3	54.23	-17.02	21.2	23.9	23.14
1.25	70.1942	4.38109	12	47.4442	9.31107	12		1.25	75.77	82.47	82.73	63.4	60.82	61.34	88.16	97.37	63.49	60.86	62.83	43.09		1.25	34.77	39.82	24.64	140.22	54.54	31.22	46.23	36.03	25.38	34.03	29.35	73.1
0.626	87.5542	5.36372	12	82.3292	14.5289	12		0.626	103.87	97.68	104.12	99.23	89.18	84.54	81.25	84.21	100	46.05	58.22	102.3		0.626	163.4	151.49	155.19	56.69	61.96	65.46	98.82	85.68	18.97	27.56	33.65	69.08
0.313	70.1925	4.12672	12	91.665	14.3016	12		0.313	79.9	71.13	90.98	43.81	77.06	51.8	84.21	82.24	70.72	56.58	73.68	60.2		0.313	64.23	180.31	139.91	159.99	133.31	64.12	87.22	73.76	39.36	25.8	75.09	56.88
0.156	81.4192	13.204	12	79.4483	10.3022	12		0.156	74.23	55.41	87.11	43.3	62.89	43.56	123.36	116.45	75.66	43.42	52.96	198.68		0.156	95.35	105.17	153.54	93.87	72.91	88.42	112.29	39.74	53.93	31.29	41.28	65.59
0	99.9458	11.1937	12	99.9983	11.0724	12		0	118.3	120.1	98.2	92.01	88.4	82.99	81.91	115.79	202.96	81.25	45.07	72.37		0	63.23	80.82	170.84	68.43	69.4	147.27	133.94	126.36	96.56	69.38	54.19	119.56

## Sheet: EDF5J
	ENZA LN95			ENZA LNCaP
[ENZA] uM	MEAN	SEM	N	MEAN	SEM	N		[ENZA] (uM)	LNCaP95 % Activity (means of 3 technical replicates for an n=17 independent experiments)																		[ENZA] (uM)	LNCaP % Activity (means of 3 technical replicates for an n=18 independent experiments)
10	67.7429	4.74213	17					10	90.76	47.28	83.15	73.64	104.35	45.83	75.76	74.24	78.03	76.52	82.58	58.74	43.27	35.82	56.59	43.98	81.09		10
5	75.8424	4.12408	17					5	88.32	77.99	101.9	76.36	82.34	54.92	65.15	60.61	81.06	61.74	71.59	56.73	74.5	65.76	67.77	80.23	122.35		5
2.5	76.8106	3.4478	17					2.5	85.6	74.73	87.77	89.67	84.78	61.36	59.09	91.29	81.44	84.09	84.47	62.32	67.77	47.42	69.2	72.06	102.72		2.5
1.25	80.2788	5.57301	17					1.25	73.91	64.67	92.12	64.67	68.75	69.32	87.12	77.27	77.27	82.2	118.18	65.19	63.9	56.16	59.74	99.57	144.7		1.25
0.626	77.8159	5.3387	17	-39.2339	10.8566	18		0.626	84.78	69.84	76.63	79.35	70.65	56.06	69.32	75.76	73.86	94.32	106.82	68.91	49	43.55	101.58	68.34	134.1		0.626	-63.68	-49.4	-123.36	-98.72	-96.17	-38.77	23.8	33.7	-44.35	-34.98	-84.05	-16.63	11.78	-12.72	-67.78	-29.48	-49.22	33.82
0.313	74.6018	5.13089	17	14.26	15.7441	18		0.313	75	75.54	98.37	97.83	104.62	57.58	71.97	56.82	93.18	82.58	76.52	32.95	53.72	50	73.78	59.6	108.17		0.313	-32.69	-60.26	-80.44	-71.53	-67.95	17.4	100.25	66.82	9.47	42.3	9.1	160.57	18.57	27.23	-6.65	-7.15	10.15	121.49
0.156	83.0982	3.92948	17	56.755	17.1423	18		0.156	65.76	66.3	79.08	85.33	71.2	79.92	87.12	60.61	85.23	78.41	85.23	108.6	121.35	76.36	104.87	68.19	89.11		0.156	49.7	25.3	-41.95	36.35	-40.04	-4.09	249.92	123.34	139.64	17.36	0.92	92.78	80.67	99.75	11.21	88.39	-5.54	97.88
0	100.922	5.95003	17	100	13.014	18		0	94.29	100.54	116.03	90.49	113.04	87.12	99.24	70.45	166.29	89.02	89.02	98.71	121.35	103.58	133.81	80.37	62.32		0	85.25	83.69	253.14	54.6	64.56	58.75	89.18	130.71	85.51	38.04	163.67	92.9	38.98	31.15	114.6	128.19	129.49	157.59
