# Supplementary material for: Rational optimization of a transcription factor activation domain inhibitor
Source: Nat Struct Mol Biol. 2023 Dec 4;30(12):1958–69. doi: 10.1038/s41594-023-01159-5 (PMC10716049; doi:10.1038/s41594-023-01159-5)
Supplement: Supplementary file 24 — Statistical source data. [file 41594_2023_1159_MOESM24_ESM.xlsx]

## Sheet: EDF6B
Sourced from Supp table 2 - Small Mol Inh BioiD pivot table
	AR-WT DMSO	Log10
MED1	6.93666e+07	7.84115
MED10	6.88002e+06	6.83759
MED12	102142980	8.00921
MED13	5.82475e+06	6.76528
MED13L	2.24747e+06	6.35169
MED14	2.84828e+07	7.45458
MED15	271519947	8.4338
MED17	6.8415e+07	7.83515
MED20	1.34331e+07	7.12818
MED22	1.52132e+07	7.18222
MED23	917055344	8.9624
MED24	9.91223e+06	6.99617
MED27	6.05153e+07	7.78187
MED28	1.0282e+07	7.01208
MED30	1.09047e+07	7.03762
MED31	1.85326e+06	6.26794
MED4	46040653	7.66314
MED6	15352116	7.18617
MED7	1.15419e+07	7.06228
MED8	5.32387e+07	7.72623
MED9	1.26435e+07	7.10187

## Sheet: EDF6C
Sourced from Supp table 2 - Small Mol Inh BioiD pivot table
	AR-WT DMSO	AR-WT-1ae	AR-WT-EPI
MED1	6.93666e+07	2.27009e+07	3.9965e+07
MED10	6.88002e+06	1.00838e+06	1.04135e+07
MED12	1.02143e+08	4.33217e+07	8.46799e+07
MED13	5.82475e+06	0	5.59607e+06
MED13L	2.24747e+06	0	6.67188e+06
MED14	2.84828e+07	4.33322e+06	3.98494e+07
MED15	2.7152e+08	2.00529e+08	1.80615e+08
MED17	6.8415e+07	3.05132e+07	5.04292e+07
MED20	1.34331e+07	7.30398e+06	1.4418e+07
MED22	1.52132e+07	8.06501e+06	7.64087e+06
MED23	9.17055e+08	7.35173e+08	1.16842e+09
MED24	9.91223e+06	1.36409e+07	2.11923e+07
MED27	6.05153e+07	2.98358e+07	4.10203e+07
MED28	1.0282e+07	3.75656e+06	7.43702e+06
MED30	1.09047e+07	1.37935e+07	9.15745e+06
MED31	1.85326e+06	0	3.78817e+06
MED4	4.60407e+07	5.0124e+07	5.879e+07
MED6	1.53521e+07	5.70866e+06	9.82108e+06
MED7	1.15419e+07	0	8.40414e+06
MED8	5.32387e+07	2.01976e+07	2.34141e+07	Significance (P-value)
MED9	1.26435e+07	0	1.07241e+07	AR-WT-1ae	AR-WT-EPI
Total	1.73287e+09	1.19001e+09	1.80245e+09	0.00976795	0.806128
