# Supplementary material for: Rational optimization of a transcription factor activation domain inhibitor
Source: Nat Struct Mol Biol. 2023 Dec 4;30(12):1958–69. doi: 10.1038/s41594-023-01159-5 (PMC10716049; doi:10.1038/s41594-023-01159-5)
Supplement: Supplementary file 25 — Statistical source data. [file 41594_2023_1159_MOESM25_ESM.xlsx]

## Sheet: ED7A
	EPI-001 [2.5 uM]	EPI-001 [2.5 uM]	EPI-001 [2.5 uM]	EPI-001 [25 uM]	EPI-001 [25 uM]	EPI-001 [25 uM]	CAM7 [0.5 uM]	CAM7 [0.5 uM]	CAM7 [0.5 uM]	CAM7 [5 uM]	CAM7 [5 uM]	CAM7 [5 uM]
24 Hour [FKPB5_1]	0.749	0.72	0.782	0.436	0.373	0.447	0.585	0.564	0.616	0.298	0.303	0.365
24 Hour [FKPB5_2]	0.728	0.649	0.845	0.412	0.287	0.393	0.497	0.51	0.594	0.285	0.312	0.336
6 Hour [FKBP5_1]	1.15	1.153	0.844	0.864	0.646	0.696	1.011	0.935	1.026	0.899	0.914	0.591
6 Hour [FKBP5_2]	1.131	1.016	0.88	0.875	0.557	0.7	0.788	0.721	1.064	0.85	0.614	0.731
	EPI-001 [2.5 uM]	EPI-001 [2.5 uM]	EPI-001 [2.5 uM]	EPI-001 [25 uM]	EPI-001 [25 uM]	EPI-001 [25 uM]	CAM7 [0.5 uM]	CAM7 [0.5 uM]	CAM7 [0.5 uM]	CAM7 [5 uM]	CAM7 [5 uM]	CAM7 [5 uM]
24 Hour [PSA_1]	0.729	0.666	2.693	0.574	0.48	0.503	0.628	0.521	0.524	0.191	0.178	0.221
24 Hour [PSA_2]	0.684	0.613	2.318	0.384	0.36	0.48	0.536	0.591	0.621	0.193	0.168	0.274
6 Hour [PSA_1]	4.408	1.437	1.056	0.797	1.13	1.165	0.959	0.952	1.309	0.741	0.844	1.01
6 Hour [PSA_2]	3.176	1.336	0.735	0.602	0.938	0.957	0.71	0.817	1.056	0.481	0.746	0.698

## Sheet: ED7B
Condition	SampleID	PC1	PC2
6_DMSO	6hr_DMSO_Rep1	-2.77068	-2.24454
6_EPI_2.5uM	6hr_EPI_2.5uM_Rep1	-2.83065	-2.28768
6_EPI_25uM	6hr_EPI_25uM_Rep1	4.63838	0.233318
6_1ae_0.5uM	6hr_1ae_0.5uM_Rep1	-0.452532	-0.980387
6_1ae_5uM	6hr_1ae_5uM_Rep1	6.74764	-0.342081
6_DMSO	6hr_DMSO_Rep2	-1.88212	-0.573507
6_EPI_2.5uM	6hr_EPI_2.5uM_Rep2	-2.5285	-2.61761
6_EPI_25uM	6hr_EPI_25uM_Rep2	3.53641	-2.4831
6_1ae_0.5uM	6hr_1ae_0.5uM_Rep2	-4.01648	-5.74047
6_1ae_5uM	6hr_1ae_5uM_Rep2	6.02839	-1.46635
6_DMSO	6hr_DMSO_Rep3	-5.80317	-5.14403
6_EPI_2.5uM	6hr_EPI_2.5uM_Rep3	-5.73342	-4.79621
6_EPI_25uM	6hr_EPI_25uM_Rep3	0.505472	-4.46242
6_1ae_0.5uM	6hr_1ae_0.5uM_Rep3	-4.38433	-5.85352
6_1ae_5uM	6hr_1ae_5uM_Rep3	4.33276	-3.16755
24_DMSO	24hr_DMSO_Rep1	-6.11248	4.60783
24_EPI_2.5uM	24hr_EPI_2.5uM_Rep1	-5.61283	4.52057
24_EPI_25uM	24hr_EPI_25uM_Rep1	5.24991	1.73268
24_1ae_0.5uM	24hr_1ae_0.5uM_Rep1	-3.35843	4.11612
24_1ae_5uM	24hr_1ae_5uM_Rep1	14.0005	4.30598
24_DMSO	24hr_DMSO_Rep2	-7.20969	3.57898
24_EPI_2.5uM	24hr_EPI_2.5uM_Rep2	-5.78266	4.06017
24_EPI_25uM	24hr_EPI_25uM_Rep2	3.30806	-0.277988
24_1ae_0.5uM	24hr_1ae_0.5uM_Rep2	-4.33374	3.09234
24_1ae_5uM	24hr_1ae_5uM_Rep2	11.4869	-1.02835
24_DMSO	24hr_DMSO_Rep3	-7.03443	3.19073
24_EPI_2.5uM	24hr_EPI_2.5uM_Rep3	-4.3562	3.89713
24_EPI_25uM	24hr_EPI_25uM_Rep3	4.97497	0.186329
24_1ae_0.5uM	24hr_1ae_0.5uM_Rep3	-2.96475	3.50069
24_1ae_5uM	24hr_1ae_5uM_Rep3	12.3577	2.4429

## Sheet: ED7D
Gene	ANDROGEN_RESPONSE	MYC_TARGETS_V1	MYC_TARGETS_V2	E2F_PATHWAY	G2M_CHECKPOINT	6hr_DMSO_Rep1	6hr_EPI_2.5_Rep1	6hr_EPI_25_Rep1	6hr_1ae_0.5_Rep1	6hr_1ae_5_Rep1	6hr_DMSO_Rep2	6hr_EPI_2.5_Rep2	6hr_EPI_25_Rep2	6hr_1ae_0.5_Rep2	6hr_1ae_5_Rep2	6hr_DMSO_Rep3	6hr_EPI_2.5_Rep3	6hr_EPI_25_Rep3	6hr_1ae_0.5_Rep3	6hr_1ae_5_Rep3	24hr_DMSO_Rep1	24hr_EPI_2.5_Rep1	24hr_EPI_25_Rep1	24hr_1ae_0.5_Rep1	24hr_1ae_5_Rep1	24hr_DMSO_Rep2	24hr_EPI_2.5_Rep2	24hr_EPI_25_Rep2	24hr_1ae_0.5_Rep2	24hr_1ae_5_Rep2	24hr_DMSO_Rep3	24hr_EPI_2.5_Rep3	24hr_EPI_25_Rep3	24hr_1ae_0.5_Rep3	24hr_1ae_5_Rep3
PA2G4	yes	yes	yes	yes	no	0.325282	0.180338	-0.966372	0.065358	-0.882853	0.0317475	0.482988	-0.998595	-0.0610967	-0.595979	0.0225902	0.34793	-1.01485	0.378833	-0.307881	1.1955	1.01146	0.490043	1.01769	-1.92465	0.738857	1.1122	-1.33835	0.722395	-1.77556	1.21556	1.24555	0.107205	1.33403	-2.15937
ELOVL5	yes	no	no	no	no	0.374966	0.674689	0.620714	0.263661	-0.236798	0.418637	0.344	0.149397	-0.255385	-0.43185	0.308362	0.669552	0.840367	0.235334	-0.306677	1.2784	0.9678	-0.683701	0.216436	-1.99064	1.32762	0.981759	-0.412206	0.397979	-3.15966	0.769379	0.0382387	-1.21053	-0.263044	-1.92681
PGM3	yes	no	no	no	no	-0.720883	-0.282318	-0.901633	-0.640335	0.798521	1.16208	-0.68939	0.620234	-1.19089	0.13561	-0.351895	-1.31773	0.655132	-0.144664	-0.242998	0.605136	1.69368	-1.42533	0.183466	1.13206	-0.218134	1.1101	0.571302	-0.680741	-0.187993	0.485467	-0.197247	-2.4603	0.1578	2.3419
PIAS1	yes	no	no	no	no	-0.0654918	0.120646	0.26355	-0.60509	-0.463493	0.624799	-0.619217	-0.00128258	0.0304884	0.38411	-0.0469267	-0.87804	0.092578	-1.00618	-1.37826	2.29861	1.14349	-1.25477	1.47924	-0.198753	0.295159	1.29371	-0.867608	-1.18321	-0.6131	1.32103	1.3851	-2.07816	0.93836	-0.411298
RRP12	yes	no	yes	no	no	-0.00602223	-0.200426	-1.67446	-0.704272	-1.28845	-0.0350914	0.243283	-0.738959	0.31626	-0.708452	0.983806	1.17756	0.0324366	0.981965	0.199333	0.771273	0.552901	0.22347	0.699765	-3.38594	0.867929	0.605773	0.0957172	0.729984	-0.555063	1.15969	0.753578	-0.114751	0.544881	-1.52771
APPBP2	yes	no	no	no	no	-0.986758	-0.0547617	0.23053	0.762081	-0.496469	0.502591	-0.979688	-0.757911	-0.898666	-0.265363	-0.438708	-0.182694	0.279077	-1.61426	-0.950229	0.385068	0.972017	-0.807934	0.777248	2.14356	1.44311	0.934469	0.467746	1.01467	-0.459684	-0.0593738	-0.377731	-2.17932	-0.453078	2.05046
GNAI3	yes	no	no	no	no	-0.206727	-0.117979	-0.618198	-0.0257389	-0.590035	0.0487698	-0.646976	-1.3844	-0.865253	-0.933186	-0.390562	-0.646619	-0.414357	-0.832665	-1.16474	1.22536	1.62563	0.0031943	1.11978	-0.27896	1.72813	1.92269	-0.0229637	0.914778	-1.87409	0.994963	1.01103	-1.22551	1.03206	0.612575
IDI1	yes	no	no	no	no	-0.877279	-0.90018	0.0758278	-0.662581	-0.330453	0.0383938	-0.852761	-0.538231	-1.16345	-0.536916	-0.664636	-0.753744	0.755013	-0.860315	-0.292571	0.617385	0.785869	-0.649858	0.94045	1.57065	1.81124	0.997132	-1.15979	1.08421	-0.0106883	0.222257	0.206933	-1.91019	0.576635	2.48164
PLPP1	yes	no	no	no	no	-0.152386	-0.182316	-0.755168	-0.327077	-1.15639	0.0167284	-0.326217	-1.02776	-0.919283	-1.48515	-0.465033	-0.282741	-0.701258	-0.466387	-1.00413	1.22977	1.62298	1.01312	0.713283	-1.13046	1.45809	1.46565	0.262635	1.24735	-1.45661	1.32162	1.16119	0.391085	1.079	-1.14413
PTPN21	yes	no	no	no	no	0.248167	0.400281	1.19857	-0.0490015	1.36623	0.757007	-0.111358	1.80531	0.487999	0.475634	-0.0393017	0.595399	0.162496	-0.0123936	0.994512	0.488735	0.763095	-1.46685	-0.328259	-1.62549	0.414918	0.0166458	-2.07609	-0.586343	-1.46362	1.11141	0.0922073	-1.82237	-0.220431	-1.57712
ACTN1	yes	no	no	no	no	1.01348	0.793241	-1.94816	-0.215017	-0.879424	-0.772976	0.306153	-0.688016	0.0819232	-0.117663	0.990371	1.23746	-0.83258	1.06367	1.2386	0.938305	0.262224	-0.560863	0.440323	-2.34	0.163678	-0.425749	-0.960889	0.258908	-0.362105	1.03609	0.636365	0.699301	1.0344	-2.09106
LMAN1	yes	no	no	no	no	-1.14245	-0.7829	-0.237487	-0.644371	-1.08208	-0.570025	-0.991819	-0.84321	-1.37459	-1.01306	-0.996332	-0.788392	-0.176738	-1.202	-1.14416	0.672398	1.1869	0.400678	0.330707	1.47834	1.06229	1.39262	1.46422	0.584445	-0.027065	0.698738	0.625741	0.70056	0.225207	2.19383
TPD52	yes	no	no	no	no	-0.473026	-0.554541	0.0225654	-0.25826	-0.828583	-0.407859	-0.242863	-0.710172	-0.981817	-1.04706	-0.153414	-0.100703	0.0448699	-0.385704	-0.943079	1.76367	1.31357	-0.67784	1.0563	-0.96087	2.01779	1.7064	-0.496518	1.22002	-1.66725	1.60801	0.94028	-1.19757	0.333147	0.0605048
XRCC5	yes	no	no	no	no	-0.494529	-0.45395	-0.494732	-0.239836	-0.922102	-0.181645	-0.917959	-1.07598	-0.960118	-0.386692	-0.80269	-0.163124	-0.536249	-0.254927	-0.499942	1.59684	1.53542	-0.363735	1.52142	-0.619228	1.42336	1.54885	-0.868949	0.961073	-1.27358	1.28993	1.29353	-0.740919	1.78228	-0.701812
CDC14B	yes	no	no	no	no	1.01613	0.767821	1.65966	0.123996	1.04277	0.0330974	0.795609	0.772111	0.850301	0.218258	0.669045	0.748999	1.2855	1.47866	1.18978	-1.02284	-0.782998	-0.114437	-1.4944	-1.50584	-0.110598	-0.642972	-0.312537	-1.27446	-0.50074	-1.19983	-0.643856	-1.1878	-1.84936	-0.00906685
B4GALT1	yes	no	no	no	no	-1.06266	-0.242566	0.408708	-0.656277	0.503299	-1.12243	-0.799003	-0.266167	-1.05552	0.618993	-0.477683	-0.415207	-0.233761	-1.03735	0.669488	-0.130975	-0.0516622	0.624757	-0.700532	2.94722	-0.333578	-0.714265	1.22992	-0.327767	2.16279	-0.388692	-0.877795	0.669615	-0.710988	1.77008
HSD17B14	yes	no	no	no	no	0.79117	-1.01159	0.206849	0.0568441	0.194792	0.262429	-0.286305	1.16804	-0.101997	0.383626	0.937801	-0.251969	1.29789	-0.217626	0.791262	-1.75624	0.330107	0.623644	-1.25037	0.937741	-1.25618	-0.540953	0.448105	-0.786146	1.11508	-3.14593	-0.733985	1.23335	-0.0523714	0.612924
FKBP5	yes	no	no	no	no	0.353586	0.404795	-0.602155	-0.139697	-1.11698	0.257371	0.313709	-0.629626	0.122255	-0.881646	0.454293	0.508942	-0.296945	0.270803	-0.766485	1.73004	1.39548	-0.808562	0.412654	-1.97083	1.52932	1.19451	-0.693844	0.377163	-1.77131	1.70532	0.862329	-0.86984	0.334098	-1.67874
SCD	yes	no	no	no	no	-0.755915	-0.560396	0.325867	-0.560952	-0.0534216	-0.940087	-0.624184	0.0931247	-1.10018	0.0439728	-0.892755	-0.543677	0.272489	-0.680014	-0.0732744	-0.159159	-0.258665	0.531577	-0.493067	2.81834	-0.574293	-0.671738	1.21728	-0.709054	2.50299	-0.679833	-0.296191	1.13213	-0.319981	2.00905
VAPA	yes	no	no	no	no	-0.827005	-0.958226	-0.218955	0.106995	-0.212146	0.365066	-1.03841	-1.53624	-0.937801	-1.23734	-0.733366	-0.396735	-0.418759	-0.986661	-0.959097	0.519371	1.18366	0.871458	1.21667	1.63973	1.40647	1.23951	-0.0939798	1.49216	-0.942544	-0.231343	0.464486	-1.15689	0.530338	1.84958
MYL12A	yes	no	no	no	no	0.130756	-0.339343	1.89618	0.598184	-0.576534	0.591646	-0.337672	0.57417	-1.17125	-0.33832	-0.572734	-0.4213	1.4167	-0.725765	0.223638	0.713001	-0.053217	2.04751	0.327674	0.403247	-0.138005	0.679886	-2.4855	-0.874046	-1.7046	0.736794	0.292126	-1.56766	0.883759	-0.209335
SMS	yes	no	no	no	no	-0.171994	-0.118048	-0.369016	-0.254046	-0.5483	-0.308553	-0.339321	-0.364392	-0.906644	-0.683059	0.11772	0.163128	0.297507	-0.0858048	-0.288367	1.80288	1.31166	-0.287267	0.836938	-2.01162	1.60851	1.44226	-1.06172	0.451045	-1.82309	1.63323	1.17209	-0.76191	0.947192	-1.40101
TSC22D1	yes	no	no	no	no	-0.931834	-0.111358	1.5421	-0.439424	-0.0327313	-0.105797	-0.604584	1.32829	-1.14149	0.221184	-1.6645	-0.471676	0.285544	-1.09899	-0.473474	0.174207	-0.096083	0.290975	-0.648957	2.55038	-0.219447	-0.427809	0.796316	-0.657013	1.5384	-0.905573	-0.88395	0.375773	-0.407745	2.21927
UBE2I	yes	no	no	no	no	0.510727	0.0625862	-1.05335	-0.492261	-1.02475	-1.05025	0.36369	-0.863093	-0.785406	-0.411163	0.0977973	0.466798	-1.36157	0.593098	0.278157	1.67247	0.837702	0.995039	1.21066	-1.0372	0.658866	0.602746	-1.86664	0.888403	-0.666702	1.01394	1.28004	0.137006	1.09402	-2.15137
HOMER2	yes	no	no	no	no	0.674441	0.783149	0.021412	0.20928	-0.627422	0.633454	0.74802	0.285904	0.14015	-0.317867	0.656608	0.605572	0.232449	0.371389	-0.43459	1.05334	0.761946	-0.559718	-0.113351	-2.61309	0.876123	0.725884	-0.453958	-0.107916	-2.42437	1.01137	0.682773	-0.165864	0.0646266	-2.71974
NDRG1	yes	no	no	no	no	0.74372	0.43806	-0.136552	-0.130298	-0.928372	0.74747	0.395439	0.035152	-0.98598	-0.973373	0.407805	0.931217	-0.126503	-0.0257479	-0.234881	1.8944	1.07986	-0.438268	-0.340695	-1.57582	1.20521	0.872179	-0.85299	-0.173005	-1.7275	2.26688	0.510588	-0.65213	-0.160815	-2.06505
GSR	yes	no	no	no	no	0.171863	0.0551325	0.0982958	0.106531	-0.561334	-0.0433298	-0.140885	-0.354019	-0.653628	-0.420493	-0.322378	0.269342	-0.0741999	0.0212338	-0.0838676	1.78484	1.64392	-0.213049	0.562461	-1.83759	1.46069	1.09314	-1.01549	0.629028	-2.1779	1.23904	0.746206	-0.562433	0.893678	-2.31482
CDK6	yes	no	no	no	no	-0.0354987	-0.0157984	0.696786	0.994328	-1.43328	0.0377768	-1.81211	0.922863	-1.15447	0.940419	-0.170908	0.153923	1.78411	-0.348206	1.57126	-0.0273827	-0.556904	-2.0459	-0.853104	-0.389707	0.563982	0.199304	0.757263	-0.381375	0.569407	0.537031	-0.828243	0.798375	-1.78433	1.31039
ZMIZ1	yes	no	no	no	no	0.793889	0.751015	-0.170284	-0.174845	-1.59786	0.0260241	0.514066	-0.312804	0.473389	-1.45285	1.05557	0.615416	0.0424901	0.651615	-0.991543	1.10341	0.838171	-0.84709	0.364895	-2.07884	0.89502	0.447843	0.631598	0.461395	-1.58631	0.879874	0.867905	0.0902858	0.305101	-2.59653
INPP4B	yes	no	no	no	no	-0.207224	0.284072	1.11951	0.0417827	-0.0196631	0.337232	0.306207	0.469792	-0.196509	-0.0107686	-0.0286448	0.148553	1.22778	0.235167	-0.129492	1.20708	0.893192	-1.62084	-0.117333	-2.02133	0.962123	1.19233	-0.629124	0.178172	-2.62442	1.1422	0.917721	-0.991663	-0.126448	-1.93944
CCND1	yes	no	no	no	yes	1.34285	0.975068	-1.55542	0.659785	-0.725968	0.886775	0.860492	-1.61135	0.735682	-0.225102	1.20211	1.2049	-1.71579	1.45556	0.00838637	0.193718	0.27825	-0.263382	0.834106	-1.24758	0.654072	0.402196	-0.774202	0.866533	-1.42393	0.0446385	-0.4485	-1.18102	0.0455274	-1.47839
CAMKK2	yes	no	no	no	no	0.417205	0.305113	-0.839644	-0.182858	-1.84098	-0.460882	0.34002	-0.84701	-0.0445678	-1.08669	0.0973974	0.34884	-0.579115	0.706386	-1.59901	1.83575	1.53148	-0.259273	0.0441524	-1.17034	1.49835	1.03635	0.20208	0.425966	-1.46516	1.13798	1.35168	-0.0397449	0.689816	-1.55328
MAK	yes	no	no	no	no	0.657002	0.396989	-0.0878558	0.028716	-0.566621	0.45155	0.503531	-0.629603	-0.219707	-0.636486	0.66202	0.516572	-0.498538	0.235645	-0.504105	1.38855	1.04892	-0.354059	0.8222	-2.49087	0.982069	1.19876	-0.430924	0.30268	-2.45427	1.1723	0.548496	-1.06911	0.832545	-1.80638
CCND3	yes	no	no	no	no	0.437578	-0.0875557	-1.6692	0.406041	0.262406	0.261297	0.752131	-1.29327	-0.134465	0.0653108	0.607729	1.18169	-1.38067	0.295976	-0.26784	0.14817	0.788138	1.11116	0.613295	-1.44427	0.263471	0.315885	-0.936399	0.74301	-1.57812	1.15572	0.701302	0.344321	1.15147	-2.81431
SRF	yes	no	no	no	no	0.759559	0.342089	-1.11272	-0.528086	-0.631026	0.4947	0.713936	1.02899	1.10721	0.0521492	0.866109	1.2164	0.461791	1.11151	0.115202	-0.381507	-0.28236	-0.34824	-0.412222	-2.81079	1.43719	-0.493415	-0.408038	0.109296	-0.216144	0.604213	-0.304376	-0.34239	0.631643	-2.78067
HMGCS1	yes	no	no	no	no	-1.26017	-0.430277	1.24171	-0.0361786	-0.405374	-0.370977	-1.15626	0.00372404	-1.03005	-0.311176	-1.18363	-0.526369	1.15529	-0.874531	-0.838866	0.648345	1.14168	-0.928933	0.109825	2.03987	0.904965	1.04656	-0.358984	0.0325628	0.837404	0.114439	0.0684928	-1.92679	0.0199838	2.27371
HMGCR	yes	no	no	no	no	-0.460852	0.0811638	-0.465013	-0.122368	-1.15689	0.348319	-0.306622	-1.14831	-1.02283	-1.18197	-0.00445833	0.0168305	-0.34762	-0.809941	-1.37584	1.8979	1.6712	-0.824464	0.768339	0.10227	2.0013	1.52729	-0.664461	0.77284	-0.834999	1.34193	0.792317	-1.39987	0.629122	0.175678
LIFR	yes	no	no	no	no	-0.217868	0.0710725	0.984001	0.144168	-0.228969	0.654518	-0.363354	-0.175992	-0.288175	-0.049329	-0.211021	0.229514	0.193577	-1.19865	-0.739758	1.82869	1.02692	-2.50247	-0.272681	0.552077	1.74209	1.46756	-0.377649	-0.0371671	-1.39626	1.20518	-0.287387	-1.9869	-0.68219	0.916462
DHCR24	yes	no	no	no	no	0.54518	0.409201	-0.475299	-0.0460108	-0.673435	-0.1209	0.4411	-0.599054	-0.42691	-0.336376	0.619547	0.700134	-0.344849	0.428663	0.125778	1.7184	1.03256	-0.458522	0.338071	-2.16623	1.11527	0.701662	-0.739687	0.130394	-1.7881	1.67252	0.990636	-0.653547	0.473922	-2.61413
UAP1	yes	no	no	no	no	-0.172514	-0.00804518	0.0496918	-0.180953	-1.29828	0.367623	-0.179969	-0.360844	-0.652694	-1.17765	-0.0528748	0.146128	0.0214139	-0.414699	-1.37693	1.66339	1.60926	-0.454362	0.951547	-1.19543	1.58149	1.62546	-0.338126	0.596612	-2.02243	1.34272	1.01805	-0.754315	0.828652	-1.16193
SGK1	yes	no	no	no	no	0.457004	0.428819	-0.0205229	0.0352607	-0.640493	-0.523373	0.981401	-0.864741	-0.713915	0.655454	-1.29141	-0.0910754	-0.265626	-0.0968504	-0.0975684	1.86129	2.09873	-0.342816	-0.121147	-1.54092	1.1493	0.160941	0.010828	-0.609754	-0.950823	1.64426	1.39941	-2.40795	-0.173841	-0.12988
ELL2	yes	no	no	no	no	0.513759	0.403077	-0.0388061	0.122437	-1.07074	0.576109	0.29708	-0.418701	-0.137095	-0.978082	0.446153	0.632122	-0.0613926	0.0422372	-1.20301	1.44722	1.3353	-0.811373	0.585014	-1.72139	1.44505	1.27045	-0.824055	0.424115	-2.04883	1.38857	0.7388	-1.06741	0.528699	-1.81531
PTK2B	yes	no	no	no	no	0.482875	0.86755	-0.234999	-0.54373	-0.682344	-0.607978	-0.591848	0.270889	-0.0863354	-0.0967142	0.308438	0.139795	-0.444818	1.43268	1.50316	0.277054	-0.664649	0.508592	-1.17165	-2.12697	-0.726404	-1.23448	-1.06028	-0.22526	1.18487	1.24272	1.46081	0.914016	1.67592	-1.77091
ACSL3	yes	no	no	no	no	-0.385263	-0.242221	-0.221733	-0.525781	-1.03122	-0.00873361	-0.157116	-0.621009	-0.695875	-0.99529	-0.132042	0.0503372	-0.381567	-0.553289	-0.890598	2.04302	1.63866	-0.909231	0.618376	-0.866615	1.93188	1.61415	-0.424177	0.538103	-1.40247	1.90499	1.16291	-0.673835	0.566504	-0.950869
PMEPA1	yes	no	no	no	no	0.937514	0.793877	-0.150458	0.297407	-1.60841	0.791031	0.804213	-0.178701	0.117765	-1.39505	0.788997	0.975158	-0.206905	0.405415	-1.3109	1.14556	0.838465	-0.681783	0.254469	-1.82413	0.969854	0.74596	-0.505671	0.246743	-1.87918	1.15094	0.698708	-0.379826	0.336446	-2.1775
SPDEF	yes	no	no	no	no	0.112341	0.039008	-0.734548	-0.484454	-1.05422	-0.35854	0.214438	-1.40184	-0.771748	-1.11675	-0.0677138	-0.0436181	-1.32674	-0.261307	-0.535778	1.39848	1.34433	0.425133	0.658418	-1.1588	1.28711	1.12282	-0.388455	0.566108	-0.839463	2.03181	1.60615	0.291271	1.17866	-1.73212
ABCC4	yes	no	no	no	no	0.132346	0.19087	0.324247	-0.00558248	-0.624177	0.375583	-0.0091701	0.138643	-0.281275	-0.666197	0.360015	0.470913	0.52417	-0.112427	-0.826776	1.58494	1.32567	-0.646479	0.46925	-1.9939	1.34259	1.26358	-0.288252	0.308162	-2.64565	1.14074	0.82063	-0.848772	0.234378	-2.05807
STEAP4	yes	no	no	no	no	0.548053	0.174497	0.44127	-0.426399	-0.283548	0.955025	0.255894	-0.329883	0.195157	-0.886637	1.12173	0.578692	0.392543	0.104946	-0.545173	1.44103	1.13131	-1.59449	-0.00315097	-2.04324	1.20151	1.13321	-1.35538	-0.0504372	-1.57884	1.56346	0.298431	-1.30333	0.488947	-1.62518
DNAJB9	yes	no	no	no	no	-1.22454	-0.535969	0.752861	-0.622628	-0.428614	-0.407601	-1.51445	0.712622	-1.00791	-0.471086	-0.798979	-0.77933	0.703489	-1.73664	-0.442158	-0.302367	-0.143231	1.19081	-0.101545	2.25019	0.695834	0.36816	0.990624	0.730751	0.885984	-0.663307	-0.540738	0.774933	-0.696519	2.36135
SPCS3	yes	no	no	no	no	-1.17394	-1.11665	0.121229	-0.460732	-0.4938	-0.429906	-0.817983	-0.941024	-0.719207	-0.678241	-0.727886	-0.147116	-0.420771	-1.09431	-1.54938	1.57605	1.46102	0.534196	0.92236	1.26774	1.85029	1.41901	1.12871	0.861497	-1.23768	0.0245678	-0.301204	-0.391087	0.0279806	1.50627
SAT1	yes	no	no	no	no	-0.651322	-0.582235	1.19321	-0.588728	-0.128245	-0.0769866	-1.10809	0.942877	-2.74216	-0.625754	-1.07016	-0.994662	1.0502	-1.12291	-0.325389	0.600481	0.64416	-0.0849463	0.333072	1.62081	0.337462	0.752858	-1.36872	-0.538321	0.937304	1.22634	0.639508	0.194302	-0.08004	1.61609
ADRM1	yes	no	no	no	no	1.2928	1.05989	-0.735331	0.575077	-0.434403	0.556085	1.72313	-0.52372	-0.107982	-0.15635	0.505374	0.757237	-1.15627	1.16083	0.535241	-0.524723	-0.588129	1.81539	-0.422301	-1.5718	-0.853615	-0.288358	-1.66494	-0.291156	-0.759182	0.290122	0.478175	1.13823	0.455603	-2.26493
AKAP12	yes	no	no	no	no	-0.126076	-0.00845772	-1.33416	-0.534435	-1.43381	-0.299845	0.394451	0.317746	0.518922	-0.160888	1.05483	0.957687	0.978765	0.390413	0.071409	1.02881	1.2887	-0.969729	0.255378	-2.47989	1.28237	0.886832	-0.215245	0.347639	-1.63735	1.29065	0.624097	-0.736488	0.069628	-1.82194
SLC38A2	yes	no	no	no	no	-1.56457	-0.963834	0.920157	-0.520934	0.503664	-0.421752	-1.27843	-0.0242755	-1.17856	0.188619	-1.08324	-0.997511	0.761409	-1.44773	-0.137638	-0.107517	0.667756	0.261337	0.514971	2.14163	0.90182	0.494638	1.29235	0.565901	0.467159	-0.666805	-0.637023	-0.572882	-0.536436	2.45773
MAP7	yes	no	no	no	no	-0.154105	-0.0189154	-1.08364	-1.062	-1.1334	-0.297173	-0.233033	-0.235757	0.814343	-0.663434	1.41482	1.02846	1.31898	1.64002	0.83218	-0.216557	0.119549	-0.364971	0.394487	-3.06138	1.29644	0.507868	0.910838	0.531843	-0.796085	0.840808	-0.196861	-0.410456	-0.636655	-1.08622
ITGAV	yes	no	no	no	no	-0.591648	0.193266	1.21103	0.56723	0.746133	-0.104987	-1.17371	0.239846	-0.734924	0.263139	-0.986318	-0.222196	0.170533	-0.54269	-0.846924	1.00652	1.06171	-3.0364	-0.0529136	1.75858	0.443158	0.543964	0.667197	-0.658974	-0.877647	-0.0412055	0.287071	-0.391841	-0.982388	2.08539
HERC3	yes	no	no	no	no	0.580189	0.606579	0.666782	0.527265	-0.26556	0.926184	0.553205	0.454738	0.243716	-0.354724	0.804736	0.667621	0.834171	0.519942	-0.24843	0.751496	0.653865	-1.01756	-0.0425225	-2.46611	0.728773	0.629415	-0.285844	-0.0524524	-2.78234	0.640101	0.20923	-0.899011	-0.204986	-2.37847
BMPR1B	yes	no	no	no	no	0.742294	1.16593	0.390399	-0.0124435	-0.972568	0.642777	0.691674	0.0381955	-0.00314449	-0.345673	0.864046	0.654035	0.348224	0.235042	-1.02955	1.02379	1.07719	-1.07794	0.235825	-1.72463	1.18999	0.97429	-1.093	0.174423	-2.27198	1.10656	0.443574	-1.30013	-0.0948856	-2.07232
SORD	yes	no	yes	no	no	0.54019	0.431375	-0.28962	0.314906	-0.453214	0.299063	0.454885	-0.754546	-0.481536	-0.688262	0.354328	0.593574	-0.255855	0.316088	0.185177	1.23312	0.832328	0.295562	0.360182	-2.17147	0.672004	0.897852	-0.693496	0.469981	-2.62767	1.36015	0.780152	-0.097388	0.740889	-2.61875
ABHD2	yes	no	no	no	no	0.273411	0.488057	0.483877	0.102919	-0.675912	0.339807	0.0689497	0.123058	-0.347721	-0.556157	0.347982	0.379903	0.335532	-0.0151156	-0.514195	1.5933	1.28436	-0.591176	0.320555	-2.06391	1.38866	0.862992	0.110771	0.312544	-2.64065	1.09122	0.648797	-0.570533	-0.0964716	-2.48485
AKT1	yes	no	no	no	no	0.522856	1.00857	-1.4608	-0.156012	-0.665465	-0.386344	0.77755	-0.392633	0.80274	-0.0708874	1.39908	1.39911	-0.478533	1.86951	0.759498	-0.382058	-0.497263	0.639761	0.0938872	-2.74278	-0.343025	-0.0449583	-1.20693	0.613877	-0.249563	0.40112	0.158626	0.168014	0.571293	-2.10824
KLK3	yes	no	no	no	no	0.481379	0.395857	-0.183452	0.07564	-0.848337	0.454933	0.453803	-0.0813568	0.0830252	-0.929756	0.500657	0.496723	-0.0930751	0.171582	-0.662227	1.09462	0.993432	-0.106383	0.48691	-2.27577	0.90809	0.923587	-0.29304	0.469197	-2.45491	1.27769	0.905743	-0.0828829	0.526742	-2.68841
IQGAP2	yes	no	no	no	no	0.211904	0.270259	0.263335	0.135954	-0.683956	0.347134	0.0897403	0.0120601	0.026072	-0.408099	0.363513	0.709189	0.244211	0.125396	-0.533658	1.25555	1.25584	-1.03951	0.505178	-2.23757	1.00725	1.23214	-0.144042	0.145654	-2.84936	1.1927	0.857657	-0.782214	0.405386	-1.97772
TNFAIP8	yes	no	no	no	no	0.287642	0.242104	-0.425942	-0.119983	-1.20241	0.320491	0.143043	-0.724106	-0.163768	-1.53953	0.283535	0.624945	-0.373112	-0.0475012	-1.29508	1.58107	1.4611	-0.366293	0.469282	-1.25503	1.69149	1.50485	-0.448968	0.582638	-2.04361	1.22878	0.974231	-0.377415	0.580456	-1.5929
FADS1	yes	no	no	no	no	-0.968728	-0.794967	-1.22884	-1.13638	-0.603907	-1.54538	-0.770219	-1.23918	-0.746668	-0.489146	-1.21355	-0.800431	-1.06856	-0.724438	-0.134705	0.491668	1.07697	0.796134	0.623204	1.87209	0.654934	0.667137	0.937859	0.239154	1.76789	0.859962	0.712627	0.884904	0.446257	1.4343
ARID5B	yes	no	no	no	no	-0.267774	0.223913	0.241249	-0.111244	0.363877	-0.277355	-0.445343	0.578819	-0.984279	2.41369	-1.60324	-0.261579	-0.642494	-1.08053	0.350983	2.30222	0.282413	-1.77574	-1.00453	1.257	0.739061	0.0963847	0.473096	-0.997294	0.91829	-0.197947	-0.11044	-0.326683	-1.30574	1.15121
SEC24D	yes	no	no	no	no	-1.29039	-0.860128	0.421424	-1.30605	-0.570037	-0.690769	-0.711991	-0.314093	-1.46503	0.0684266	-0.691895	-0.291309	0.0306154	-0.656935	0.292165	0.429674	-0.335964	1.50758	-0.162036	1.80851	-0.602156	-0.104386	1.63479	-0.692562	1.98868	-0.101942	-0.319781	1.20573	-0.446755	2.22661
NGLY1	yes	no	no	no	no	-1.20723	0.0246822	0.509355	1.02527	0.0374971	1.36282	-0.14697	-0.490312	-0.323544	-0.146567	-0.170009	-0.572827	0.202054	-0.523289	-1.32308	1.43711	1.47085	-0.475305	0.696982	-0.395513	1.14375	1.22216	-1.37816	0.260895	-2.02779	1.15923	0.651257	-2.30785	0.616473	-0.331955
GPD1L	yes	no	no	no	no	-0.181534	0.0461227	-0.0170736	0.690027	0.0964858	1.17261	0.169145	-0.68856	-0.376791	-0.0107347	0.0201531	0.396728	0.0101558	-0.10325	-0.0526196	1.12118	1.40849	-0.629395	0.769074	-0.832348	1.70988	0.983133	-0.51436	1.33038	-3.32291	0.228799	-0.667999	-1.46525	0.0346504	-1.32419
SRP19	yes	no	no	no	no	-0.611175	-1.12536	-0.0781597	0.810933	-0.86259	-0.631384	-0.19756	0.435613	-0.684551	-0.591575	-0.565805	0.190746	0.184289	-0.523987	-1.63822	0.613498	1.20035	0.176208	0.384416	1.46087	1.77887	0.94432	0.921709	0.754608	-0.528865	-1.01024	-0.998844	-0.914394	-1.42248	2.52876
MERTK	yes	no	no	no	no	0.0514597	-0.0624194	1.18689	-0.98621	2.23014	0.563626	0.0184497	1.51521	-0.532105	1.04298	0.0360923	0.295113	0.147689	0.391101	0.962878	-0.955424	-1.0708	0.07186	-1.12836	1.1013	-1.28122	-0.677012	0.403554	-1.49378	1.29535	-1.1404	-1.83185	0.344849	-0.898019	0.39904
ANKH	yes	no	no	no	no	0.752511	0.593861	0.354717	0.0177615	-0.820208	0.499203	0.0979122	0.256267	-0.773549	-0.685729	0.503324	0.156288	0.441427	-0.249653	-0.73241	1.57366	0.733195	-0.227729	0.351164	-2.22492	1.03908	0.485184	0.16614	0.21859	-1.98064	1.63316	0.964305	-0.519227	0.112298	-2.73598
ADAMTS1	yes	no	no	no	no	0.891388	1.28166	0.612319	0.732819	-0.46734	1.10505	0.972391	0.741783	0.482368	-0.38412	1.1772	1.27308	0.802341	0.750071	-0.404617	0.437942	-0.0588063	-0.241998	-0.983531	-2.31265	0.478436	-0.0681326	0.00207648	-0.499665	-1.89049	0.189326	-0.479293	-0.623306	-1.26031	-2.25599
DBI	yes	no	no	no	no	-0.109184	-0.430284	-0.373804	-0.550078	-1.10868	-0.40822	-0.390956	-0.659121	-1.31205	-1.21923	-1.00873	-0.126299	-0.603608	-0.56659	-0.822619	1.58052	1.53268	0.88609	1.07941	-0.220992	1.23108	1.35544	-1.5782	0.591736	-0.475358	1.83582	1.29132	-0.462684	1.4467	-0.404106
SLC26A2	yes	no	no	no	no	-0.178727	0.660978	0.693301	1.04589	-0.16856	1.19249	-0.229008	-0.500396	0.225808	-0.105518	-0.109276	0.127437	0.165411	-0.330397	-0.888043	0.822867	0.898951	-2.51203	0.330694	0.227559	1.66928	1.7509	-0.29676	0.693569	-1.8845	0.0303931	-0.428049	-2.39348	-0.583474	0.0726883
ELK4	yes	no	no	no	no	-0.0666135	0.313491	1.11107	0.531581	-0.31229	0.41497	0.314412	0.525074	0.278842	-0.13444	0.0539653	0.362516	1.00699	-0.232641	-0.983744	1.06078	1.22652	-1.66962	-0.0134506	-0.738153	1.33198	1.29724	0.832766	0.247349	-3.06476	0.0606647	-0.0932001	-1.72655	-1.10556	-0.829179
AZGP1	yes	no	no	no	no	0.988273	0.815137	0.35855	0.082933	0.201714	0.979199	1.2793	0.528941	0.196442	-0.0105687	0.409799	0.834655	0.396377	0.733122	0.704196	0.0861904	-0.263204	0.971264	-0.934433	-2.24337	0.121603	-0.151877	-1.4537	-1.13044	-1.82346	0.912613	0.178832	0.251041	-0.274979	-2.74415
PDLIM5	yes	no	no	no	no	0.312544	0.165456	0.103958	0.231277	-0.349166	0.594528	0.116596	-0.0161137	0.0384374	-0.0774121	0.43205	0.397941	-0.0227083	0.0922845	-0.374103	1.60642	1.08711	-0.939082	0.0340905	-2.23604	1.37052	1.21354	-0.708693	0.0604876	-2.56304	1.44707	0.911128	-1.02377	0.0375715	-1.94288
GUCY1A1	yes	no	no	no	no	-0.122758	0.367182	1.50717	0.406141	-0.215197	1.11898	0.276017	-0.0282615	0.199163	0.0874104	-0.304015	1.09362	1.1879	-0.805461	-0.934435	1.31176	1.12734	-2.13221	-0.0640928	-1.18544	0.465463	0.910593	-0.982115	-0.710508	-2.08598	0.629811	0.868656	-1.67674	0.532342	-0.842331
HPGD	yes	no	no	no	no	0.437595	0.511585	0.459701	0.39234	-0.204438	0.661644	0.339587	0.023628	-0.00776761	-0.696061	0.134152	0.591259	0.495017	0.0770922	-0.118579	0.96048	0.957155	-1.31041	0.634265	-2.02657	1.13987	0.916101	-0.934592	0.396876	-2.8459	1.0167	0.843378	-0.640093	0.0275028	-2.23151
CENPN	yes	no	no	no	no	0.27677	0.173177	-0.310571	-0.297358	-1.18089	0.209141	0.0325752	-0.516661	-0.502549	-1.29676	0.219404	0.253858	-0.269138	-0.0350723	-1.08243	1.4682	1.34986	-0.481139	0.891835	-1.31506	1.49773	1.40049	-0.726992	0.668694	-1.96535	1.71147	1.19636	-0.540156	0.797157	-1.6266
B2M	yes	no	no	no	no	-0.816344	-1.01662	0.241031	-0.790632	-0.598607	-0.0527679	-1.84633	-0.620625	-1.29105	-0.877757	-1.7342	-0.706222	0.529423	-0.905717	-0.85064	0.595067	1.47516	1.4042	0.712584	1.46912	1.03906	1.41891	-0.137393	0.503258	-0.360891	0.99501	0.648954	-0.561651	0.959685	1.17599
NKX3-1	yes	no	no	no	no	0.596186	0.61692	-0.16983	0.247058	-1.47873	0.567439	0.609635	-0.260736	0.106168	-1.59135	0.512615	0.704031	-0.245048	0.122627	-1.62375	1.16609	1.03511	-0.15896	0.617123	-1.82285	1.15528	0.92797	-0.127073	0.620839	-2.11276	1.06041	0.789415	-0.35913	0.468743	-1.97344
KLK2	yes	no	no	no	no	0.415852	0.332955	-0.339801	-0.116211	-1.25917	0.44046	0.299907	-0.252331	0.0565295	-1.33886	0.437442	0.379506	-0.284684	0.0789048	-1.12367	1.21131	1.08836	0.0355279	0.605749	-2.00215	1.02137	1.02195	-0.00694066	0.636828	-2.19126	1.36494	1.02995	0.105065	0.685789	-2.33333
RAB4A	yes	no	no	no	no	0.944421	0.325083	0.649189	0.293676	-1.71469	1.17428	0.556714	-0.670105	-1.37508	-1.02039	-0.398006	0.254599	0.661812	0.0654568	-0.57605	1.30878	0.730849	0.484	0.454063	-1.53119	1.06363	1.02428	-1.71614	0.00790443	-1.85383	1.17209	0.958882	-0.810696	0.726092	-1.18962
KRT8	yes	no	no	no	no	1.26794	1.0076	-0.628031	0.555263	0.288724	0.618326	1.60914	-0.459903	-0.130102	0.101153	0.394536	1.11232	-0.583712	0.701908	1.20835	-1.05328	-1.10779	2.11119	-1.3582	-0.418556	-1.84103	-0.82693	-1.24591	-1.33406	0.76384	0.00186861	-0.311191	0.899954	-0.468215	-0.875195
KRT19	yes	no	no	no	no	0.593486	1.03495	0.283349	-0.0353564	-0.517485	0.602615	0.730529	-0.75637	-0.802396	0.0520677	0.0955942	0.785462	0.323978	0.569789	-0.672087	0.660803	1.57587	-1.19618	0.486892	-2.28255	-0.10062	0.632422	-1.85246	0.340529	-1.33756	1.00042	0.863832	0.335823	0.904516	-2.31987
RPS6KA3	yes	no	no	no	no	-1.31664	-0.915957	-0.199958	-0.513398	-0.448531	-0.508955	-1.10062	-0.858374	-0.681103	-0.325288	-0.815259	-0.639807	-0.192107	-0.686498	-1.28595	1.20503	1.52968	-0.569537	1.3533	0.321735	1.80161	1.64976	0.769243	1.43352	-1.2823	0.517275	0.71104	-0.824905	0.493551	1.37945
MAF	yes	no	no	no	no	0.557827	0.196182	-0.45594	0.113928	-1.32533	0.56943	0.410052	-0.384899	-0.143614	-1.35525	0.778424	0.717726	-0.518062	0.0569205	-1.50067	1.49126	1.39329	-1.05978	0.319819	-1.67124	1.48846	1.1191	-0.639639	0.286952	-1.2835	1.63156	1.00751	-0.981097	0.529632	-1.34906
TMEM50A	yes	no	no	no	no	-0.767264	-0.832776	-1.39186	0.589044	1.13479	-0.944605	-0.357408	-0.9309	-1.59152	0.466988	-1.71262	-0.756499	1.00926	-0.544164	-1.0429	0.488899	1.63055	0.327049	0.754108	1.09696	0.715466	0.773688	-0.148304	1.93598	0.0727365	0.566872	-0.77799	-1.1394	0.0687283	1.30708
TMPRSS2	yes	no	no	no	no	0.502668	0.61751	0.576451	-0.123628	-1.84746	0.466192	0.460876	0.510693	-0.192403	-2.03855	0.446094	0.60167	0.531376	-0.0246297	-1.82844	0.951958	0.791569	0.674513	0.0729705	-1.76978	0.609709	0.676832	0.806223	0.0939374	-1.77145	0.859626	0.599024	0.666647	0.134705	-2.05491
ALDH1A3	yes	no	no	no	no	-0.377536	0.650609	1.97886	-0.243352	-0.909705	-0.50133	-0.949994	1.79345	-0.318668	-0.798811	-0.499325	0.13857	2.29568	-0.151707	-0.335885	0.716275	0.582177	0.0591742	0.282308	-1.86359	0.734437	0.150666	1.28122	-0.286324	-1.77723	0.0708008	0.0358818	0.180847	-0.234328	-1.70319
INSIG1	yes	no	no	no	no	-1.28777	-1.02735	0.997152	-0.964038	-0.196648	-1.35912	-1.33775	0.493209	-1.38778	-0.203455	-1.29813	-1.25701	0.831499	-1.22573	-0.279777	0.56264	0.757622	-0.0907404	-0.0622929	1.93327	0.516824	0.373275	0.509424	0.0440304	1.62188	0.14601	0.363066	0.591024	0.119134	2.11754
NDUFAB1	no	yes	no	no	no	-0.875849	-0.68313	-0.845646	-0.459645	-1.83802	-0.0637984	-0.908943	-1.04207	-1.17986	-1.19729	-0.739251	-0.413051	-0.186933	-0.281218	-0.763986	1.18957	1.06029	1.41664	1.06361	0.307209	1.13214	1.17708	-1.09943	1.00225	-0.436909	1.32405	1.12186	-0.239001	1.6591	0.800244
IFRD1	no	yes	no	no	no	-1.37521	-0.733155	0.727527	-0.712974	0.855014	-0.212917	-1.21605	-0.034596	-1.10941	0.750523	-0.931422	-1.08919	-0.160302	-1.02928	0.380411	-0.424668	-0.541487	0.225183	0.358161	2.296	-0.186789	-0.330938	0.580219	-0.150705	1.86662	-0.31743	-0.530265	0.543329	-0.244043	2.74783
PSMC4	no	yes	no	no	no	1.26033	0.553924	-0.606092	0.068989	-0.0194643	0.62594	1.5509	-0.641465	-0.216269	0.863911	0.393418	0.569521	-1.25707	1.46364	1.21156	-0.509028	-0.319785	1.28747	-0.320357	-1.25753	-1.71281	-0.435621	-1.96648	-0.740031	0.046311	0.328495	0.883757	0.223256	0.748669	-2.0781
PSMA4	no	yes	no	no	no	-1.0026	-0.371592	-0.100589	-0.255215	-0.25904	0.397565	-1.45805	-1.56404	-0.625759	-0.789447	-1.17338	-0.342481	0.229631	-0.907578	-0.894782	0.81104	1.42524	0.523761	1.7078	0.662618	1.5387	1.32742	-0.296478	1.22754	-0.820288	0.4213	0.410713	-1.89117	0.93862	1.13054
NOP16	no	yes	yes	no	no	0.278805	0.294751	-0.642476	-0.0236446	-0.987651	0.297692	0.128678	-1.15877	-0.391976	-0.758532	0.0116005	0.274097	-0.852999	0.411997	-0.595256	1.15308	0.939198	0.454861	0.85855	-1.96964	0.715277	1.01762	-1.3667	0.801165	-1.44084	1.59795	1.69934	-0.0524305	1.24844	-1.94218
FAM120A	no	yes	no	no	no	0.499415	-0.219832	-0.0785069	-0.692242	-0.901757	-0.550975	-0.150132	-0.483839	-0.984201	1.08422	0.366073	-0.487282	-1.45148	0.341948	0.82639	1.52452	0.923728	-1.85999	0.852614	-0.40377	1.32007	0.0293566	-0.730824	1.0594	-0.929066	1.47368	1.57055	-0.694357	0.737855	-1.99157
CUL1	no	yes	no	no	yes	-0.169621	-0.090629	-0.446448	0.409112	0.0159599	-0.2032	-0.628287	-1.14059	-0.747664	-0.231322	-1.22362	-0.920075	-1.02127	-0.177108	-0.399719	1.7972	1.99953	-0.316134	1.22346	-0.928559	1.25615	1.15613	-0.458399	0.868391	-1.87245	0.69884	1.19925	-0.895168	1.64592	-0.399683
RPL18	no	yes	no	no	no	0.254193	-0.0947152	-0.319807	-0.712931	-0.659676	-0.0841557	0.481673	-0.0520157	-1.12052	-0.800982	-0.728156	-0.111594	-0.821535	-0.0410231	-0.0263919	-0.258675	-0.00451541	3.36445	0.103143	-0.306031	-1.29727	-0.085167	-1.69581	-0.563257	0.595581	1.03011	1.20943	1.97197	1.12214	-0.348477
PABPC1	no	yes	no	no	no	-1.16304	-1.13721	0.166493	-1.38142	-0.809707	-1.60388	-1.33707	-0.228687	-2.01439	0.47955	-1.23095	-1.10694	0.178493	-0.925854	0.275954	1.22876	0.956968	0.99097	0.841842	1.15101	0.619979	0.356775	1.4931	0.422445	0.678396	0.291154	0.610331	1.28813	0.509164	0.399646
MCM2	no	yes	no	yes	yes	-0.153658	-0.242987	-1.22285	-0.737213	-1.1458	-0.519795	-0.377042	-1.19957	-0.319015	-0.802526	0.0858637	0.0718215	-0.799721	0.0621478	-0.34314	1.23887	1.22003	0.172095	1.1469	-1.97305	1.26932	1.21588	-0.086486	1.33216	-1.07065	1.49067	1.39544	0.170322	1.42294	-1.30098
CLNS1A	no	yes	no	no	no	-1.36463	-0.869487	-0.503857	-0.51039	-0.807107	-1.05602	-0.708844	-0.916554	-1.17952	-1.28215	-0.570431	-0.724603	-0.100724	-0.481339	-0.967645	0.680742	1.66436	1.20387	0.997944	0.308859	1.33035	1.60435	-0.596031	1.28112	-0.880864	0.854036	1.36568	0.346283	1.33986	0.542764
SLC25A3	no	yes	no	no	no	-0.380174	-0.50489	-0.693596	-0.636797	-0.857551	-0.668578	-0.373612	-0.626036	-1.78166	-0.98662	-1.09485	-0.632113	-0.917567	-0.608919	-0.128345	1.24687	1.4602	1.63844	1.2452	-0.527889	0.603782	1.11691	-0.867258	0.695696	-0.272839	1.03682	1.36069	0.832883	1.96628	-0.644466
EXOSC7	no	yes	no	no	no	0.824794	0.193313	-0.541621	0.2618	-0.715668	-0.0140259	0.391368	0.765026	0.327166	-0.128745	0.447987	0.973089	-0.846525	0.114093	-0.593156	1.06151	0.356017	-0.124384	0.350327	-2.94253	0.789009	0.239895	-1.42369	0.145944	-1.91033	1.30668	1.5107	0.00300242	0.924098	-1.74515
MCM6	no	yes	no	yes	yes	-0.321548	-0.307716	-0.926573	-0.426995	-0.863285	-0.315702	-0.679444	-1.25853	-0.70342	-0.859021	-0.849271	-0.561771	-0.96578	-0.258904	-0.632992	1.5943	1.27513	0.161981	1.42678	-0.789891	1.43474	1.43144	0.0339426	1.07716	-1.30261	1.55523	1.25323	0.0462002	1.61583	-0.882524
SNRPA	no	yes	no	no	no	0.105661	-0.187874	-0.800489	-0.829416	-0.71265	-1.01896	0.0264948	-0.0837887	-1.45583	0.0659768	-0.571449	0.134234	-0.814269	-0.372254	0.413102	1.30627	1.05165	0.290038	1.15202	-1.11946	0.471464	0.712501	-1.35148	0.862039	-0.516254	1.84357	1.78036	-0.11274	1.73262	-2.00109
VDAC3	no	yes	no	no	no	-0.354019	-0.312148	-0.41054	-0.691171	-1.11293	0.509651	-1.28537	-0.762335	-1.01173	-0.459112	-1.05224	-0.4143	-0.734368	-0.296793	-0.600651	1.22117	1.24686	0.7548	1.48019	-0.653778	0.788707	1.31739	-1.12676	0.979248	-1.24044	1.28834	1.49651	-0.299353	2.10143	-0.36626
XPO1	no	yes	no	yes	yes	-1.17523	-0.816464	-0.00206821	-0.426761	-0.220339	-0.133208	-1.23839	-0.78403	-0.47331	-0.681799	-0.529014	-0.441888	0.340818	-1.11143	-1.25241	0.988339	1.5241	-0.456009	1.22654	0.66848	2.05559	1.47223	0.753202	1.68334	-1.46661	0.161042	0.283339	-1.29203	0.230869	1.11309
RPS5	no	yes	no	no	no	0.151983	-0.19442	0.393052	-0.757445	-0.595336	0.441702	0.613456	0.270041	-1.32073	-0.584899	-0.827684	0.260253	-0.011237	-0.122849	0.496354	-0.704119	0.261937	3.38951	-0.279388	-0.174477	-1.58691	-0.231046	-1.89593	-0.80117	0.459646	0.589694	0.822994	1.604	0.965564	-0.632538
STARD7	no	yes	no	no	no	0.0511241	0.149787	-0.899036	0.540699	-0.0929859	0.0982056	-0.00681298	-1.06707	-0.621519	-0.269781	-0.195295	-0.045645	-0.656543	0.0357782	-0.503321	1.33629	1.30275	-0.601513	1.13673	-1.70683	1.37608	1.41972	-0.712284	1.40687	-2.26183	0.770015	0.998757	-0.843744	1.28324	-1.42183
CAD	no	yes	no	no	no	0.380335	0.302102	-1.17206	0.0586877	-0.776852	-0.234585	0.146419	-0.384365	0.167208	-0.373635	0.411806	0.267166	-0.411794	0.592847	-0.117729	1.20493	0.93969	-0.694145	0.649105	-2.55843	0.802016	0.503348	-0.239762	0.94365	-1.53753	1.43382	1.13497	0.07502	1.13209	-2.64431
DDX18	no	yes	yes	no	no	-1.06554	-0.827675	-0.151808	-0.209503	-0.377304	-0.237148	-0.519643	-1.39304	-1.16428	-0.720146	-0.989301	-0.794007	-0.37142	-0.656013	-0.992472	1.20298	1.34288	-0.0855436	1.85293	0.19304	1.35913	1.73068	0.329248	1.17398	-1.04154	0.749988	0.88182	-1.30808	1.42724	0.660548
RPL6	no	yes	no	no	no	-0.26016	-0.59178	0.46164	-0.620536	-1.19066	0.0171837	-0.569546	-0.148559	-1.67219	-0.441964	-1.85618	-0.421535	0.248864	-0.651003	-0.16621	0.212955	0.270083	3.119	0.602343	0.301807	-0.910988	0.929771	-1.13292	-0.0524464	0.0149565	0.694967	1.15269	1.03372	1.70972	-0.0830322
RPLP0	no	yes	no	no	no	0.00967946	-0.378229	0.139978	-0.444797	-0.815924	-0.0723041	0.183764	-0.261979	-1.62169	-0.473921	-1.16803	-0.0996991	0.241869	-0.364509	0.338632	-0.707545	-0.197128	3.61168	-0.203408	0.0874042	-1.44985	0.458305	-1.05961	-0.294123	0.660466	0.339375	0.835125	1.83687	1.20166	-0.332063
PABPC4	no	yes	no	no	no	0.110703	-0.285925	0.12387	-0.0117907	-0.0650658	-0.592075	0.197595	0.137179	-0.792423	-0.0425619	-0.574536	-0.0763511	-0.328668	-0.771123	-0.0253177	1.41974	1.29382	-0.667901	1.23203	-1.97072	1.30485	0.956563	-1.15973	1.06134	-1.9312	1.12126	1.19306	-0.398904	1.43073	-1.88845
HNRNPC	no	yes	no	no	no	-0.978034	-0.887028	-0.757516	-0.865346	-0.885782	-0.493501	-1.09855	-0.738537	-1.14007	-0.8387	-1.10414	-0.902493	-0.509455	-1.20309	-0.962837	0.916823	1.34468	0.945472	1.59919	0.64057	1.09227	1.43662	-0.303265	1.37997	0.204767	1.10586	1.19622	0.0523202	1.36827	0.385314
CDC45	no	yes	no	no	yes	-0.36191	-0.325008	-0.817663	-0.629327	-0.666012	-0.525398	0.0456017	-0.826656	-0.603594	-0.894198	-0.25211	-0.197626	-0.986639	-0.295349	-0.303028	1.23333	1.42103	-0.0138971	1.29796	-1.58898	1.45931	1.0643	-0.295704	1.18268	-1.41517	1.56803	1.57193	0.120726	1.50471	-1.47134
SRPK1	no	yes	no	no	no	-0.18066	0.115429	-0.478276	0.210784	-0.717798	0.435537	0.00897578	-1.77174	0.084451	-0.73378	-0.137413	0.172717	-0.802209	0.335781	-0.447315	1.42443	1.19991	-1.35274	1.38832	-0.804874	1.33612	1.65867	-0.331471	0.720229	-2.00553	0.873973	0.802944	-1.64668	1.29546	-0.65325
HSP90AB1	no	yes	no	no	no	0.0449087	-0.120288	-1.24026	-0.459955	-1.30987	-0.429673	-0.097758	-1.02403	-0.305974	-0.642177	0.0951523	0.525606	-0.196295	0.628781	-0.11535	1.09803	0.627006	0.409644	1.17486	-2.72895	1.06452	0.865303	-0.185085	0.970158	-1.09232	1.28278	1.27834	-0.214451	1.63951	-1.54217
PSMD8	no	yes	no	no	no	1.05111	0.544329	-0.831887	0.252938	-0.988391	0.626695	1.00508	-1.02522	-0.684818	-0.445419	-0.161508	0.448358	-0.572088	-0.0688005	-0.714288	0.226517	0.278091	2.75105	0.126774	-1.34061	-0.91218	0.466789	-1.33794	-0.266617	-0.347719	1.1283	1.2762	0.882175	0.819661	-2.18658
RANBP1	no	yes	no	yes	no	0.0921251	-0.39762	-0.694262	-0.460986	-0.84003	-0.253742	-0.241733	-0.611311	-0.883609	-1.17023	-0.818879	-0.343244	-1.16528	-0.628523	-0.616491	1.24368	1.30045	0.762064	1.03666	-1.00886	1.09128	1.2713	-0.918473	0.926278	-0.976163	1.47393	1.67882	0.617005	1.84547	-1.30962
SF3A1	no	yes	no	no	no	0.178966	-0.217526	-1.67918	-0.341915	-0.631153	-0.976757	0.14017	-1.31451	-0.270959	0.494095	0.0548725	0.215802	-0.349671	1.16788	0.679983	1.64311	0.446469	-1.04784	0.847875	-2.02871	0.993226	0.162462	-0.453848	0.874588	-0.624822	1.44628	1.45261	-0.15881	1.21208	-1.91478
SNRPD3	no	yes	no	no	no	-0.505688	-0.583231	-0.446971	-0.391791	-0.913923	-0.11594	-0.0657652	-0.712961	-1.75778	-0.337995	-0.867314	-0.720085	-1.33967	-0.72869	-0.153826	1.72052	1.31954	0.478705	0.766867	-0.661242	0.368216	1.63654	-1.10119	0.238962	-0.263959	1.94598	1.71481	0.316666	1.6423	-0.481077
MCM5	no	yes	yes	yes	yes	0.00238848	-0.147583	-1.39448	-0.337498	-1.0988	-0.272109	0.0650569	-1.29544	-0.329442	-0.815153	-0.0410246	0.0533581	-1.31168	-0.108182	-0.424832	1.26316	1.19249	0.343751	1.25118	-1.48943	1.04998	1.0925	-0.272081	1.25717	-1.1929	1.57318	1.41996	0.0703037	1.44324	-1.54709
EIF3D	no	yes	no	no	no	-0.430024	-0.382953	-1.28252	-1.10459	-1.05938	-1.00448	-0.503501	-0.935233	-1.32058	-0.829304	-0.859379	-0.138389	-0.969056	-0.375334	-0.680665	1.22534	0.809408	1.97445	0.936045	-0.333199	0.280866	0.804138	-0.376613	0.316177	0.583519	1.28046	1.39669	1.6321	1.74571	-0.399707
PSMC6	no	yes	no	no	no	-1.07526	-0.791958	0.664431	0.120621	-0.436384	0.0653246	-1.27977	-0.777286	-1.21838	-0.546062	-0.858883	-0.306223	-0.00685798	-0.790223	-1.06289	1.41287	1.55568	-0.503747	1.23169	0.0547211	1.18914	1.19531	-0.607313	0.657099	-0.774799	0.576006	1.26452	-1.7929	1.83262	1.0089
ERH	no	yes	no	no	no	-1.03779	-0.604127	-0.395392	-0.619325	-1.02137	-0.453472	-1.02005	-1.05313	-1.48042	-0.855031	-0.637986	-0.42722	-0.545887	-0.61915	-1.15084	0.892849	1.56714	0.844318	1.68959	0.961756	1.55238	1.07632	-0.690248	1.33619	-0.369598	0.851038	1.0042	-0.796124	1.10069	0.900698
APEX1	no	yes	no	no	no	0.360146	-0.0551624	-0.675611	-0.24449	-0.838126	-0.0252689	-0.178863	-0.998109	-1.1915	-1.02986	-0.843887	-0.513823	-1.03907	-0.414816	-0.82268	0.82684	0.774437	1.8484	1.3826	-1.14476	0.683799	0.92398	-1.43682	0.659804	-0.151108	1.42992	1.7092	0.537103	1.66649	-1.19876
PSMA6	no	yes	no	no	no	0.238317	0.496964	-0.124988	0.555468	0.209327	0.197252	-0.99958	0.667246	0.553437	0.0543946	1.00411	1.77221	0.284639	-0.161587	-1.13984	1.38283	-0.141964	-0.00776136	-0.794924	-2.63897	0.114815	0.0598653	-1.06784	-2.07904	-0.00491693	0.892367	0.447721	1.48893	0.362433	-1.62091
PSMA7	no	yes	no	no	no	0.310388	0.139628	-0.294173	0.20897	-0.346713	0.285335	0.388217	-0.317854	-1.74944	-0.815377	-0.969786	-0.102237	-0.775688	0.420851	0.000287511	0.601538	0.802678	1.71771	0.21943	-1.33246	-0.288705	0.715014	-2.22577	-0.129114	-1.05337	1.48102	1.27084	1.24611	1.85413	-1.26146
NOP56	no	yes	yes	yes	no	0.384123	0.243856	-0.903583	0.00104041	-1.11188	0.0960937	0.495166	-0.562026	-0.280654	-0.723286	-0.216834	0.0325606	-1.06477	0.322301	-0.8088	1.21333	0.927018	0.31509	0.854459	-2.10246	0.749769	0.871674	-0.733834	0.605308	-1.51037	1.57389	1.60236	0.257614	1.50968	-2.03683
CSTF2	no	yes	no	no	no	0.0428612	0.372344	-0.863219	0.0722935	-1.06185	-0.254588	-0.524216	-1.18801	-0.920516	-0.531201	0.00764848	-0.565069	-0.928271	0.230031	-0.0373888	1.00893	1.16884	-0.375633	1.09199	-1.80273	0.973722	1.23103	-0.878648	0.653066	-1.09665	1.27557	1.58959	-0.541485	2.4866	-0.635036
PRPS2	no	yes	no	no	no	0.274652	0.116565	-1.59841	0.0986387	0.0164354	-0.757178	-0.526004	-1.19302	-0.916029	-0.818963	-0.804919	-0.0992431	0.246859	-0.145984	0.0651056	1.12376	1.3406	0.528617	0.622426	-1.33667	1.6753	0.473821	-0.443517	0.741669	-2.41051	1.49015	1.12859	-0.11731	1.72108	-0.496518
PGK1	no	yes	no	no	no	0.0866203	-0.604517	-0.250157	-0.719133	-1.00843	-0.692278	-0.157668	-0.927192	-2.1761	-0.588944	-1.23146	-0.10565	-0.201359	-0.330364	0.202823	1.05794	0.559996	1.91865	0.688278	-0.849143	-0.00885133	1.07256	-1.15974	0.483409	-0.288598	1.08238	1.54304	0.639445	2.37033	-0.405875
PSMD7	no	yes	no	no	no	0.183246	0.46089	0.519955	0.576758	-1.96653	0.486418	0.339028	-0.0376403	-1.74363	-0.529222	-0.966226	0.660001	0.476101	1.33078	0.885575	-0.172392	0.467406	1.9639	0.855718	-0.81789	-0.75616	0.426508	-2.27174	0.0814412	-0.923874	0.110579	1.06135	-0.446846	1.05814	-1.31164
GSPT1	no	yes	no	yes	yes	-0.284862	0.0869922	-0.969666	0.106151	-0.64399	-0.202497	-0.737201	-1.3633	-0.84903	-0.87432	-0.348328	0.297983	-1.3979	-0.00617718	-0.758869	1.64632	1.68947	-0.209003	1.49851	-0.368866	1.71248	1.63174	-0.23095	1.01884	-1.40315	0.945551	0.850991	-1.37668	0.804693	-0.264933
EIF3J	no	yes	no	no	no	-0.897297	-0.442528	-0.637973	0.235505	-0.823859	0.00483139	-0.979585	-1.30978	-0.405982	-0.993878	-0.493922	-0.153617	-0.80031	-0.640294	-1.37103	0.729283	1.62641	0.353798	1.63087	0.211865	2.06432	1.59077	0.317763	1.63229	-1.49402	0.491168	0.347477	-0.965033	0.420377	0.752374
MCM4	no	yes	yes	yes	no	-0.307036	-0.339323	-0.921055	-0.241355	-0.738933	-0.230671	-0.429063	-0.975497	-0.477264	-0.632847	-0.325314	-0.370337	-1.14718	-0.229763	-0.501479	1.48678	1.44171	-0.101746	1.38899	-1.24826	1.55764	1.3642	-0.229468	1.34779	-1.56481	1.35359	1.29585	-0.166858	1.33552	-1.39381
FBL	no	yes	no	no	no	-0.335891	-0.355368	-1.28933	-0.944666	-1.66137	-0.63816	-0.0854227	-0.513511	0.103736	-1.06563	0.22692	0.70949	0.395176	0.523641	-0.0360518	0.612532	0.663193	0.893005	0.786312	-2.89952	1.01979	1.02861	-0.279033	1.02173	-0.544362	1.33858	1.12443	0.408158	1.16864	-1.37562
PRPF31	no	yes	no	no	no	-0.45568	-0.289112	-1.22492	-0.360993	-1.50861	-0.984162	-0.136022	-0.944069	0.374878	-0.767596	0.751865	0.977445	-0.413565	1.1377	0.0695373	0.619782	0.144198	0.538914	0.48067	-2.71069	0.855128	0.806584	-0.355053	1.14703	-0.49529	1.40861	1.30205	0.777799	0.910704	-1.65713
SSBP1	no	yes	no	no	no	-0.573846	0.135536	-0.555538	-0.149862	-0.896007	-0.408648	-0.763743	-1.46826	-1.19941	-0.64948	-1.15479	-0.588065	-0.102916	-0.212444	-1.24937	0.622678	1.45969	0.989765	1.70549	-0.0131434	0.608086	0.895097	-1.53246	1.30677	-0.481614	1.28123	1.57839	-0.503588	1.78469	0.135766
EIF3B	no	yes	no	no	no	0.192148	0.278307	-1.72976	-0.169163	-1.30575	-0.281214	0.177024	-0.915388	0.126546	-1.02758	0.564753	0.792438	-0.541571	0.884884	0.00283926	0.908045	0.962048	0.0286332	0.569301	-2.77409	1.06438	0.835212	-0.444389	0.823381	-1.00366	1.26423	0.97772	0.0952102	1.23809	-1.59262
AIMP2	no	yes	yes	no	no	-0.415074	-0.333239	-0.143728	-0.485246	-0.424318	-0.645653	-0.629032	0.336882	-1.56998	-0.444305	-1.5288	-0.365466	-0.556993	-0.171385	0.202631	-0.115665	0.0919588	3.32582	0.344623	0.467846	-0.932446	-1.08212	-0.907259	0.255711	1.0185	0.580092	0.88802	2.13542	0.834635	0.268573
PSMA2	no	yes	no	no	no	-0.577711	-0.508806	0.321161	0.582389	-0.270103	0.4386	-0.813174	-0.497521	-0.481557	-0.227552	-0.257426	-1.76571	0.216482	-0.521004	-1.32309	0.436663	0.781579	-2.1596	1.35522	1.41211	1.94004	1.04637	0.461825	1.00612	-2.1457	0.627174	-0.142566	-0.104378	0.868718	0.301448
POLD2	no	yes	no	yes	no	-0.110155	-0.581211	-1.07408	-0.284728	-1.20466	-0.577029	0.0828605	-1.05593	-1.34188	-0.418503	-0.562536	-0.0708884	-1.14865	-0.564477	-0.227152	0.577995	0.65818	1.90704	1.14366	-0.653616	0.179486	0.749669	-0.891292	0.62446	0.297539	1.7172	1.74564	1.01903	1.68724	-1.62322
EIF4H	no	yes	no	no	no	-0.948465	-0.354001	-1.39002	-0.360875	-1.23217	-0.329241	-0.12216	-1.77944	-0.734661	-0.910761	-0.217325	0.0492587	-1.13859	0.586366	-0.347281	1.3094	0.637701	1.1157	1.20365	-0.983578	0.823567	0.879442	-0.513226	1.22722	-0.528132	1.54477	1.68389	0.219094	1.56728	-0.957425
PSMD3	no	yes	no	no	no	0.955083	1.14779	-1.20868	0.591195	-0.117689	0.220333	1.30099	-1.38464	0.0358932	-0.189992	0.421339	0.755965	-1.08448	0.926261	0.650611	0.481604	0.0905915	0.994707	-0.0768623	-2.08499	-0.508964	-0.221738	-1.01404	0.238584	-1.15981	0.84052	0.932038	0.361123	0.817994	-2.71073
KPNB1	no	yes	no	no	yes	0.183265	-0.0384838	-1.25408	-0.167004	-1.13753	-0.44996	-0.329759	-1.6153	-0.30462	-0.68989	-0.0076395	-0.0497771	-1.14591	0.275994	-0.698223	1.59927	1.17524	-0.644259	1.36098	-1.31151	1.56558	1.24347	-0.292201	0.812143	-0.978748	1.44321	1.32992	-0.319044	1.45191	-1.00704
C1QBP	no	yes	no	no	no	0.0874162	-0.224073	-0.56892	-0.521952	-0.749731	-0.580049	0.132262	-0.598962	-1.45986	-0.869969	-0.873299	-0.12451	-0.739118	0.169086	-0.181785	1.19838	0.923943	1.47334	1.10295	-1.29457	0.550914	0.981561	-1.42027	0.453949	-1.13358	1.69048	1.69927	0.567517	1.66372	-1.35413
YWHAE	no	yes	no	no	no	-0.454656	-0.773867	-0.550926	-0.440364	-0.587684	-0.525795	-0.785127	-1.02248	-1.63345	-0.759369	-1.04886	-0.245912	-0.480429	-0.724041	-0.864625	1.19551	1.43382	1.33486	2.05486	0.0597024	1.18772	1.2591	-0.954576	1.08542	-0.394709	0.753652	1.08502	-0.372785	1.63439	-0.4644
RPL34	no	yes	no	no	no	0.220359	-0.429001	0.479546	-0.561347	-0.462593	0.561327	-0.36659	0.436179	-1.5711	-1.24923	-1.30239	0.0738206	0.398956	-0.283494	-0.333188	-0.0104953	0.582329	3.21509	0.705607	-0.280973	-0.786619	0.48627	-2.26135	-0.59153	0.112372	0.608715	0.533977	0.815882	1.521	-0.261527
DHX15	no	yes	no	no	no	-0.360657	0.00950568	-0.786425	0.066791	-0.706755	0.30761	-0.571133	-1.32432	-0.392878	-0.534256	-0.142929	0.141606	-0.704162	-0.103725	-0.876565	1.5339	1.35001	-0.75702	1.31225	-0.951231	1.55025	1.55913	-0.155584	0.725528	-1.84371	1.16324	1.27829	-1.3639	1.43842	-0.861278
EIF4G2	no	yes	no	no	no	-0.146759	0.082328	-0.100631	0.379394	-0.485864	0.0255166	-0.481896	-1.05649	-1.2143	-0.585661	-0.726144	-0.158085	-0.723923	-0.682049	-1.38048	1.62449	1.18736	-0.675526	1.67041	-0.173688	1.70661	1.46056	-0.801089	0.923661	-1.37596	0.795098	0.933987	-1.45333	1.60099	-0.168547
PTGES3	no	yes	no	no	no	-0.978146	-0.707448	-0.854304	-0.223363	-0.653881	-0.204696	-0.747508	-1.40469	-0.824213	-0.901333	-0.474829	-0.458954	-0.653835	-0.700487	-0.917699	0.933375	1.38443	-0.0214699	1.34087	0.519329	2.03558	1.56276	0.327257	2.00502	-1.19063	0.452381	0.604325	-0.946329	0.550037	1.14846
HDDC2	no	yes	no	no	no	-0.392961	-0.764247	1.0888	-1.06214	-1.09465	-0.916418	-0.137025	0.25987	-1.79646	-0.617521	-1.39955	-0.470381	1.05531	-0.682204	-1.31329	0.107701	0.188897	3.21913	1.04045	-0.00143603	0.618861	-0.170703	0.0503825	0.0429941	0.0986223	-0.245832	0.784052	0.833447	0.974933	0.701355
SRSF3	no	yes	no	no	no	-0.681576	-0.281112	-0.612611	-0.158756	-0.602381	0.196597	-0.687466	-1.32174	-1.01478	-1.01277	-0.867487	-0.0614487	-1.0492	-0.857917	-1.14454	0.729288	1.45951	0.0789579	1.71551	0.144554	1.80369	1.64964	-0.732279	1.4652	-1.1956	0.626252	0.876175	-0.533562	1.32666	0.743205
NCBP2	no	yes	no	no	no	-0.524878	-0.525349	-0.0905902	1.14934	0.0656549	-0.33441	-1.20613	-1.04008	-0.601285	0.500609	-0.763775	-1.11212	-0.307187	-0.774556	-1.55287	-0.272892	0.177838	-0.420077	1.55249	1.22854	2.1165	1.45534	-0.658143	0.635435	-0.706509	0.296351	-0.392697	-1.0344	1.04478	2.09507
RRP9	no	yes	yes	no	no	0.145736	0.20755	-1.51997	-0.494329	-1.2482	-0.136467	0.451554	-1.25141	-0.0624937	-1.131	-0.00570366	0.335934	-0.825062	0.688727	-0.24137	0.958886	0.861904	0.860328	0.705312	-2.53962	0.564516	1.15387	-0.493959	1.00127	-0.635101	1.48327	1.25735	0.414466	1.10618	-1.61217
EEF1B2	no	yes	no	no	no	0.475423	-0.0622106	1.04447	-0.253254	-0.211226	0.0339214	0.649202	0.566518	-1.23307	-0.586838	-0.715057	0.435298	0.560946	-0.186251	0.427519	-1.34382	-0.503001	3.1987	-0.141037	0.176692	-1.78159	-0.0650511	-1.73167	-1.15247	0.569196	-0.452659	0.241318	1.69707	0.59355	-0.250614
PSMD14	no	yes	no	no	no	-0.616049	-0.423474	-0.53307	-0.318756	-1.18787	0.05818	-0.985674	-0.818763	-1.42421	-0.58495	-1.46049	-0.220301	0.146831	-0.920429	-1.34317	0.697857	1.38046	0.436524	1.22951	0.0664342	1.13846	1.51384	-0.475351	1.17642	-1.06719	1.34226	1.21896	-0.694437	1.39782	1.27061
PPM1G	no	yes	no	no	no	0.0693331	-0.0800243	-1.48108	-0.452551	-1.27219	-0.533647	-0.268028	-0.869256	0.0977423	-0.987863	0.56442	0.817039	-0.260611	0.883334	-0.131543	1.06103	0.936014	0.00345926	0.869945	-2.7983	1.11762	0.896332	-0.169756	0.956481	-1.02747	1.34945	1.13946	0.0285616	1.02734	-1.48525
CCT4	no	yes	no	no	no	-0.682035	-0.524071	-0.927644	-0.663096	-0.974673	-0.466298	-0.886584	-1.13149	-1.29877	-1.0011	-0.904577	-0.629551	-0.917251	-0.619073	-0.676434	1.29406	1.36798	0.711475	1.46392	-0.00357354	1.16143	1.36308	-0.245953	1.12091	-0.438307	1.49626	1.28247	0.182644	1.80195	-0.25571
HSPE1	no	yes	yes	no	no	-0.956321	-0.508332	-0.287959	-0.216938	-0.317999	0.134642	-0.909765	-0.866121	-0.843753	-0.912253	-0.47007	-0.395035	-0.0669361	-1.08182	-1.20525	0.366862	1.3468	-0.0675742	1.30867	1.30936	2.11536	1.33982	0.470425	1.82932	-1.12581	-0.257943	-0.163407	-1.27782	-0.0880675	1.79792
ODC1	no	yes	no	no	yes	-0.854729	-1.03411	-0.0829453	-0.902538	-0.590345	-0.822988	-1.17525	-0.364128	-1.81976	-0.474376	-1.42307	-0.886123	-0.168421	-0.943177	-0.081202	1.41177	1.34138	0.458642	1.46588	-0.0308926	1.21864	1.44365	-0.54085	1.01141	-0.255287	1.1348	1.23249	0.0682401	1.62865	0.0346387
SRSF7	no	yes	no	no	no	-0.11888	-0.133835	-1.14928	-0.25001	-1.11901	-0.0179492	-0.212206	-1.21817	-0.920971	-1.24856	-0.358381	0.023236	-1.19295	-0.476892	-0.996051	1.28802	1.24638	0.0672664	1.38125	-0.705437	1.37388	1.45092	-0.685509	0.894841	-0.98461	1.39664	1.51371	-0.216855	1.8122	-0.44278
ORC2	no	yes	no	yes	no	-1.0928	0.429075	0.121905	0.454965	0.0107857	0.350318	-0.73107	-1.10725	-0.0729884	-0.346403	0.106245	0.73755	-0.607857	-0.493968	-1.75661	1.69794	0.52963	-1.11881	0.998313	0.234971	1.56393	1.64617	0.228982	0.758205	-1.98935	0.326699	1.1042	-2.14145	0.128054	0.0306165
RPL22	no	yes	no	no	no	-0.64821	-0.675682	1.07733	-0.0289891	-0.783666	0.472665	-0.902211	0.694261	-2.10053	-1.08761	-1.94005	0.307822	1.07624	-0.777881	-0.633729	-0.119472	0.638181	2.02309	0.902182	0.687067	0.619183	0.584624	-1.77277	-0.0483363	-0.0960475	0.103544	-0.08872	0.0905993	0.68561	1.7415
SRM	no	yes	yes	no	no	0.660331	0.094089	-0.913968	-0.0998658	-0.571439	0.00685809	0.767055	-0.655875	-0.637327	-0.0460289	0.179705	0.409882	-1.03223	0.325048	0.614817	0.642943	0.622022	0.152062	0.623065	-2.34791	0.385395	0.466195	-0.792895	0.285484	-1.50768	1.54592	1.55214	0.51987	1.41159	-2.65924
CDC20	no	yes	no	yes	yes	0.11307	-0.056469	-1.24561	0.0559454	-0.83277	-0.644646	0.0268838	-1.5099	-0.43438	-0.881574	-0.0520136	-0.0805642	-1.46856	-0.233613	-0.643505	1.35861	1.24343	-0.180241	1.29341	-0.802259	1.04704	1.08622	-1.15991	1.25102	-0.656492	1.7111	1.54357	-0.149417	1.51141	-1.2098
RAD23B	no	yes	no	no	yes	-0.892485	-0.770348	-1.23201	-0.358537	-0.36531	0.404993	-0.806316	-1.42648	-0.878604	-0.320462	-1.21041	-0.496666	-1.15043	-1.10844	-0.835742	0.881509	1.34112	1.06031	1.43026	1.57146	1.7336	1.2146	0.174286	1.41968	-0.446051	0.151816	0.264554	-0.88664	0.500313	1.03642
SET	no	yes	no	no	no	-0.672848	-0.679932	-1.00934	-0.520703	-1.05307	-0.680688	-0.870111	-1.40141	-1.15052	-0.833061	-0.735513	-0.51464	-0.87865	-0.440531	-0.769341	1.31947	1.55459	0.464915	1.56756	0.0101538	1.73883	1.62044	-0.0918139	1.41386	-0.585038	0.670187	0.942489	-0.18611	1.30371	0.467126
TCP1	no	yes	no	no	no	-0.716552	-0.625154	-0.821686	-0.443096	-1.07485	-0.422691	-0.782968	-1.3124	-0.976486	-0.850391	-0.947754	-0.55762	-0.981194	-0.709711	-0.985118	1.52101	1.47279	0.133293	1.4022	0.0594414	1.44668	1.38659	-0.161745	1.23788	-0.521722	1.16303	1.28161	-0.12528	1.68988	0.222008
ETF1	no	yes	no	no	no	-0.928575	-0.255493	-0.766683	-0.337498	-1.0335	-0.0826135	-0.414604	-1.47134	-0.8992	-0.883697	-0.855905	-0.517171	-1.0734	-0.391691	-0.852092	1.71167	1.57907	-0.446351	1.43251	-0.0884105	1.55323	1.47053	-0.250358	1.10446	-0.838192	1.20021	0.851965	-0.347711	1.66781	0.163048
TARDBP	no	yes	no	no	no	-0.128667	0.0439078	-1.20574	-0.202121	-1.10876	0.442996	-0.503841	-1.39049	-0.0611341	-1.4871	0.418039	0.609408	-0.638244	0.116391	-1.47402	0.971625	1.74245	-0.813556	1.06736	-1.04377	1.58117	1.39529	-0.584309	1.4317	-1.02397	1.11403	0.934272	-0.650249	0.973587	-0.526246
COPS5	no	yes	no	no	no	-0.182693	-2.03186	-0.466586	-1.01131	-0.421836	0.0501234	-0.449899	-0.382103	-1.7364	-1.0497	-1.34193	-0.0313417	-0.619844	0.250751	-0.333206	1.22731	0.268688	-0.0716233	1.27245	1.05138	0.0177418	0.965707	-1.36052	0.362625	0.140578	1.71661	1.6876	-0.170624	1.24187	1.40803
CBX3	no	yes	yes	no	no	-1.15591	-0.500345	-0.609354	-0.0462112	-0.754993	-0.140015	-0.924062	-0.822362	-0.759516	-1.08803	-0.764179	-0.566616	-0.424557	-1.13914	-1.21631	1.08442	1.61029	0.113512	1.48783	0.509363	1.66859	1.86804	0.0911511	1.25049	-1.31471	0.705579	0.787039	-0.784108	1.08135	0.752749
HNRNPA2B1	no	yes	no	no	no	-0.615801	-0.356006	-0.937151	-0.850471	-1.25681	-0.458738	-0.546779	-0.0229417	1.37086	-0.89786	1.24655	1.3644	1.83178	1.28018	-0.24603	-0.107721	0.398245	-0.584909	0.159732	-2.75875	1.25067	0.68777	0.527191	0.732194	-0.6478	0.716801	0.144573	-0.860461	0.348921	-0.911628
PRDX4	no	yes	no	yes	no	-0.296445	-0.19894	-0.200461	-0.232806	-0.657509	-0.168025	-0.0809851	0.160388	-1.53487	-1.16417	-1.09275	-0.0856113	-0.033636	0.100481	0.132262	1.32954	1.31907	2.08368	0.794393	-1.27499	0.760161	1.23399	-1.26133	0.379763	-1.99547	1.18331	0.685054	0.57457	1.01879	-1.47744
CDK2	no	yes	no	no	no	0.00199448	0.101277	-0.479855	0.159155	-0.4372	-0.0107446	0.0453409	-1.16631	-0.356435	-0.646075	-0.179235	-0.107865	-1.1376	-0.130789	-0.412133	1.27305	0.956304	-0.0492119	1.07973	-1.58843	1.34744	1.20768	-0.668691	0.96369	-1.98783	1.49842	1.33555	-0.192568	1.54133	-1.96
RPS10	no	yes	no	no	no	0.374562	0.0711123	-0.00506228	-0.541883	0.464696	0.0202638	0.941781	0.771454	-0.505896	-0.555242	0.344095	0.850477	-1.00079	-1.29809	-1.09163	0.638717	1.09347	0.293836	1.8891	-1.09887	0.483065	-0.966947	-1.6607	-0.376491	0.175539	1.58682	0.819881	0.3308	0.651735	-2.69981
GLO1	no	yes	no	no	no	-0.951133	-0.788651	-0.33856	-0.212245	-0.492963	0.0219188	-1.07554	-1.35939	-1.13124	-0.867666	-1.24215	-0.912851	-0.045407	-0.538363	-0.854671	0.623723	1.42458	0.455412	1.36389	0.8197	1.763	1.56093	0.232157	1.64779	-1.08282	0.330263	0.578248	-1.03193	0.685595	1.41836
DEK	no	yes	no	yes	no	-0.81963	-0.725028	-0.515988	-0.231119	-0.500774	-0.156772	-0.764132	-0.851864	-0.746625	-0.892815	-0.720294	-0.60588	-0.301727	-0.920319	-0.86573	1.20683	1.53596	-0.468502	1.35025	0.256621	1.84271	1.68242	0.360537	1.69197	-1.78988	0.862791	0.837546	-1.11454	0.731715	0.632272
GOT2	no	yes	no	no	no	0.149263	0.0701992	-0.440802	-0.230033	-0.787653	-0.403513	0.243872	-1.41212	-1.17495	-0.100233	-0.516409	0.378758	-0.874919	0.305872	0.451956	1.34187	1.35597	0.25843	1.29459	-1.47072	1.18993	0.803325	-1.05959	0.655133	-1.53156	1.25638	1.32031	-0.568549	1.44297	-1.94777
SNRPD2	no	yes	no	no	no	0.119048	-0.44618	-0.240158	-0.343246	-0.563068	0.0812739	0.748197	-0.342022	-1.43959	-0.784425	-1.03186	0.0331663	-0.877783	-0.00615053	-0.185377	-0.140059	0.372002	2.76561	0.323248	-0.0936561	-0.712235	0.986774	-2.43349	-0.618712	0.0409882	1.28163	1.41255	1.03005	1.55173	-0.488265
SNRPB2	no	yes	no	no	no	-0.720899	-1.02595	-0.596529	-0.40134	-1.07897	0.0554513	-0.768502	-1.34298	-0.745989	-1.0299	-1.0142	-0.00602572	-0.833071	-0.582268	-0.695746	1.23899	1.09614	0.875347	1.39797	0.682249	0.89272	1.7994	-1.36288	1.44685	-0.0750265	0.770358	0.475778	-1.04034	1.38968	1.19968
HNRNPR	no	yes	no	no	no	-0.249853	-0.26688	-1.34107	-0.299891	-1.30042	-0.48361	-0.295118	-1.05353	0.0124183	-0.964781	-0.143087	0.316975	-0.240918	0.497999	-0.938538	1.50627	1.19758	-0.445103	0.480901	-1.3233	1.69858	1.64203	-0.468623	1.08509	-1.1597	1.30659	0.975892	-1.04355	1.83621	-0.538559
EIF2S2	no	yes	no	no	no	-1.35401	-1.24678	0.158369	-1.03474	-0.414447	-0.974662	-1.38051	0.0899659	-1.55861	-0.0798421	-1.66688	-1.42429	0.326382	-1.23985	-0.214646	0.358092	0.495587	1.36121	0.750037	1.54707	0.33451	0.773704	0.73513	0.350826	1.16922	0.31986	0.51925	0.770825	0.785157	1.74409
PSMB2	no	yes	no	no	no	0.537573	0.116528	-0.285701	0.0147274	-0.571352	-0.668058	0.349425	-0.175445	-0.262345	-0.198514	-0.70621	0.400768	-0.786286	0.27599	0.506296	1.27772	0.725151	1.0733	0.53698	-1.24549	0.677422	1.14822	-2.4418	0.270176	-1.15628	1.00355	1.04252	0.0509762	1.29881	-2.80865
UBA2	no	yes	no	no	no	0.350092	0.317173	0.997374	0.447565	-0.36214	-0.219442	-0.0720458	-0.817577	-0.278444	-0.628825	0.0907439	0.767498	0.00208724	0.70106	-0.503412	0.279024	1.07447	-0.461861	1.15692	-0.998506	0.789234	1.4674	-1.45951	1.0753	-2.91078	0.631285	0.59373	-1.80712	1.01986	-1.24117
CANX	no	yes	no	no	no	-1.48475	-0.640805	-0.241726	-0.617177	-1.13028	-0.825396	-1.44808	-0.38578	-1.19647	-0.779452	-0.942188	-0.601964	1.18902	-1.07295	-0.644362	0.47683	0.487378	1.75796	0.116298	0.954486	1.29573	0.558977	2.21038	0.0603567	0.245215	-0.189084	0.105842	1.31709	-0.079355	1.50426
DUT	no	yes	no	yes	no	-0.624181	-0.330715	-0.463164	-0.315638	-0.304941	-0.643481	-0.670333	-0.424528	-1.56773	-1.26194	-1.39783	-0.766279	-1.03923	-1.17958	-0.81335	1.01683	1.7281	0.888893	1.13781	-0.128249	0.930309	0.82784	-0.838608	1.10476	-0.216912	1.26335	1.31441	1.21608	1.69187	-0.133561
PSMA1	no	yes	no	no	no	-1.19104	-0.169553	0.417423	0.280953	-0.128667	-0.18158	-0.32819	-0.766194	-1.10138	-0.938562	-0.814028	-1.09622	0.103999	-0.395158	-0.467323	-0.0210507	0.909745	-0.0938403	0.589583	1.3247	1.67464	0.770437	0.615909	1.90745	-0.771819	-0.498025	-0.52207	-0.908209	-1.13798	2.93605
LSM7	no	yes	no	no	no	0.660336	0.0307118	0.440195	0.200968	0.090205	0.0383146	1.05081	-0.444592	-0.408579	-0.905993	0.248383	0.167674	-0.605123	-0.0084722	0.0133433	-0.163456	-0.155816	2.01155	-0.156442	-1.76052	-0.684889	0.109809	-2.16411	0.12958	-0.629515	1.32861	1.37153	0.75842	1.76727	-2.3302
TRIM28	no	yes	no	no	no	0.0333395	-0.0112524	-1.61788	-0.479639	-1.14508	-1.05383	0.289277	-1.21129	-0.417915	-0.430854	0.337	0.299892	-0.6428	0.458576	0.351541	1.00979	0.784888	0.362007	0.763889	-2.55755	0.843006	0.616472	-0.184318	1.05321	-0.444529	1.55875	1.21756	0.500907	1.49268	-1.77584
SNRPA1	no	yes	no	no	no	0.0385246	0.077936	-1.21857	0.170959	-0.516847	0.135459	0.283725	-1.41305	-0.486726	-0.961149	0.197624	-0.22772	-1.12123	0.413684	-0.540563	1.5151	0.977868	-0.00126278	1.26829	-1.48857	1.3735	1.16809	-1.20686	0.785945	-1.59381	1.40859	1.39162	-0.30682	1.19897	-1.32272
RAN	no	yes	no	yes	no	-0.319909	-0.376564	-0.866097	-0.511421	-1.30813	-0.0963485	-0.587913	-1.05311	-1.00216	-1.16397	-0.747943	-0.378401	-0.913245	-0.414377	-0.887975	1.22063	1.46853	1.08699	1.24379	-0.71085	1.00352	1.40728	-0.602788	1.08278	-0.836925	1.32894	1.50756	0.433756	1.69877	-0.704419
PCNA	no	yes	no	yes	no	-0.530793	-0.383657	-0.581722	-0.440838	-0.573831	0.00278176	-0.880104	-1.0177	-0.627361	-0.5727	-0.714463	-0.351943	-0.720281	-0.473577	-0.566404	1.36316	1.44293	0.673469	1.47966	-1.25016	1.30586	1.44577	-0.266618	1.21448	-1.73074	1.28431	1.31726	-0.257221	1.52066	-1.11024
EIF2S1	no	yes	no	yes	no	-0.431626	-0.208725	-1.0419	0.293536	-1.24987	0.182717	-0.405522	-1.09627	-0.643482	-1.17095	-0.333828	0.271574	-0.651016	-0.249757	-1.26668	1.33765	1.37093	0.000995294	1.52545	-0.994729	1.53285	1.73114	-0.5951	1.11772	-1.51048	1.12894	0.888409	-0.697785	1.33409	-0.168274
YWHAQ	no	yes	no	no	no	-0.833946	-0.997729	-0.23286	-0.140454	-0.561762	-0.348645	-0.671731	-1.08281	-1.51154	-0.640982	-1.11713	-0.742955	-0.45879	-0.823613	-0.72335	0.658279	1.36796	0.504978	1.64347	1.06593	1.66855	1.34954	-0.718022	1.58147	-0.684734	0.0440359	0.704357	-0.834881	0.84159	1.69578
LDHA	no	yes	no	no	no	-0.188157	-0.367136	-0.908099	-0.150367	-0.820183	-0.189457	-0.293839	-1.05759	-0.71023	-0.753431	-0.334499	-0.0257732	-0.787222	-0.15191	-0.503965	1.51776	1.55775	-0.118062	1.47556	-1.15796	1.37066	1.45596	-0.837115	1.22609	-1.57197	1.26934	1.30653	-0.623808	1.46531	-1.09419
SYNCRIP	no	yes	no	yes	yes	-0.750558	-0.442534	-0.64085	-0.255092	-1.0322	0.0433844	-0.745334	-1.32088	-0.00599262	-1.0874	0.0905548	0.315116	0.502996	-0.0685956	-1.18234	0.846051	1.34303	-0.752987	1.24845	-0.779143	2.12984	1.50093	0.11525	1.60198	-1.83713	0.952097	0.466785	-1.26414	0.839594	0.169126
CDK4	no	yes	yes	yes	yes	-0.0890932	-0.155614	-1.02466	-0.37406	-0.834389	-0.471054	-0.116849	-0.905216	-1.19051	-1.11903	-0.52031	-0.40562	-1.29468	-0.0867825	-0.353811	1.25309	1.13694	1.64827	0.993043	-0.991554	0.429603	1.21545	-0.731066	0.584161	-0.888293	1.39743	1.45177	1.10474	1.73421	-1.39612
HNRNPA1	no	yes	no	no	no	-0.990762	-0.799763	-1.0798	-1.30881	-1.56165	-0.802773	-0.840497	-0.489032	-0.383162	-1.15009	-0.309864	0.167892	0.70645	0.136228	-0.569426	0.797377	0.920717	0.834737	0.994085	-2.1936	1.40747	1.35251	0.471193	1.05724	-0.0883606	1.37538	1.13373	0.242156	1.2568	-0.286376
CCT7	no	yes	no	no	no	-0.0957642	-0.127656	-0.90401	-0.528855	-0.800906	-0.522083	0.103985	-1.22933	-1.45532	-0.584813	-0.453372	-0.37208	-1.05949	0.023978	-0.188243	1.03034	1.02682	1.03389	0.889203	-1.03645	0.938479	0.796056	-1.38863	0.998156	-0.597661	1.8833	1.59049	0.505926	1.86876	-1.34471
PWP1	no	yes	no	no	no	-0.894654	-0.637144	-0.307023	-0.538341	-1.49887	-0.0681241	-0.754767	-1.43354	-0.658691	-0.263185	-0.827625	-0.782138	-0.680972	-0.316352	-0.862714	1.48021	1.47088	0.202841	1.72435	-0.211497	1.24903	1.86295	-0.309181	0.85539	-0.71696	1.20669	1.18956	-0.901389	1.39849	0.0227632
SRSF1	no	yes	no	yes	yes	-0.603937	-0.376651	-0.948908	-0.565003	-0.903455	-0.488059	-0.535132	-1.15485	-1.12026	-0.887456	-0.701446	-0.698087	-1.21725	-0.720447	-0.751595	1.6473	1.39161	0.31586	1.50231	-0.453083	1.38328	1.4625	-0.254783	0.959948	-0.688091	1.49868	1.24737	0.102096	1.57311	-0.0155627
TRA2B	no	yes	no	yes	yes	-0.639514	-0.193061	-0.85152	-0.171768	-0.771788	0.385171	-0.383101	-1.00881	-0.523014	-1.18716	-0.45773	-0.436042	-1.36435	-1.0283	-1.6444	1.30443	1.33338	0.103089	1.44228	-0.365159	1.75953	1.44461	0.205435	1.4561	-1.19955	1.09207	1.0746	-0.391243	1.09148	-0.0756333
NCBP1	no	yes	no	no	no	-0.566849	-0.906509	-0.59966	0.114633	-0.403493	0.194198	-0.913296	-1.18898	-0.494422	-0.305022	-0.715511	-0.964636	-0.949573	-0.754242	-1.26235	1.44352	1.59242	-0.820669	1.36308	0.483776	1.86162	1.36288	0.248796	1.0574	-0.876303	0.88194	0.83488	-1.54119	1.01889	0.804681
MYC	no	yes	yes	yes	yes	0.239406	0.0558069	0.718875	-0.647457	-0.782955	-0.503142	-0.0511747	0.265235	-0.978159	-0.0353478	-0.333395	-0.145372	0.612156	-0.109631	0.144884	0.7175	1.00861	0.998719	0.269351	-1.96725	0.192793	0.515941	0.238339	0.454015	-2.04532	1.12947	1.34352	0.866981	0.932772	-3.10517
RPS6	no	yes	no	no	no	-0.0784449	-0.252791	0.640673	-0.951207	-0.682663	0.184355	-0.336407	0.697401	-1.67714	-0.40876	-1.45722	-0.0293337	0.600765	-0.423563	0.303942	-0.331252	0.0474685	3.16986	0.182115	0.108924	-1.213	-0.11571	-1.49935	-1.02448	0.66148	0.441409	0.680774	1.77026	1.2271	-0.235202
SSB	no	yes	no	no	no	-0.852106	-0.364778	-1.01671	-0.388355	-0.954465	0.166904	-0.961	-1.45598	-0.129968	-1.02242	-0.20099	0.0865055	0.458529	-0.185204	-1.29806	0.716619	1.38348	0.154715	1.33857	-0.801112	1.73834	2.05	0.375453	1.26424	-1.48913	0.719583	0.636981	-1.38911	0.771712	0.647749
HNRNPD	no	yes	no	yes	yes	-0.90802	-0.332531	-1.24334	-0.744868	-1.416	-1.06728	-0.567005	-0.636632	0.677745	-0.983301	0.944694	1.01638	1.09661	0.892801	-0.203491	0.578965	0.700421	-0.575633	0.696056	-2.21186	1.80367	1.04009	0.576843	1.40836	-1.02469	0.874791	0.568394	-0.681251	0.520989	-0.800918
RPS2	no	yes	no	no	no	0.238059	-0.301671	-0.439036	-0.586812	-0.54218	-0.143254	0.372191	-0.0511443	-1.28188	-1.04564	-1.14303	-0.322838	-0.926682	-0.48842	-0.157264	-0.368863	0.387727	3.08753	0.335655	-0.0998355	-0.750628	0.43247	-1.08867	-0.0114942	0.642937	0.720155	1.18606	2.31772	1.23949	-1.21065
TXNL4A	no	yes	no	no	no	-0.0691869	-0.0756117	-0.904741	0.283706	-0.774827	-0.128368	0.114924	0.135029	-1.5805	-1.07794	-0.566108	-0.208307	-1.29189	0.292864	-0.0384205	0.744733	0.662057	2.219	0.841237	-1.06902	1.33756	1.04582	-1.47602	0.505963	-1.41312	0.924531	1.34855	0.439863	1.24722	-1.46901
SERBP1	no	yes	no	no	no	-0.621362	-0.526591	-1.22385	-0.314601	-1.16384	-0.371488	-0.380814	-1.20167	-0.718621	-0.739122	-0.353048	-0.0179099	-0.6278	-0.299526	-0.888451	1.48059	1.34372	-0.0438621	1.15461	-1.18579	1.45922	1.59103	-0.160083	1.05751	-1.27084	1.5111	1.47133	0.144888	1.489	-0.593726
HDGF	no	yes	no	no	no	0.340949	-0.132427	-1.58684	-0.487615	-0.734214	-0.813762	0.795304	-0.537851	-0.303038	-0.63578	0.0722565	1.23944	-0.227945	0.823512	0.0990765	0.28868	0.416135	0.746204	0.836475	-2.66348	0.834054	0.907475	-1.32925	0.820885	-0.589299	0.993875	0.989755	0.662673	1.25298	-2.07823
MRPL9	no	yes	no	no	no	-0.056428	-0.497284	-1.12047	-0.57944	-0.750878	-0.857392	-0.560512	-0.545746	-0.956802	-0.149328	-0.642731	0.108817	-1.45245	0.22658	-0.671577	1.76454	0.918951	1.35046	1.29884	-0.493687	0.616891	0.269588	-2.00289	0.971805	-0.370017	1.53156	1.24486	0.693013	1.65686	-0.945119
ILF2	no	yes	no	no	no	-0.432093	-0.563059	-0.969371	-0.482016	-1.09162	-0.571893	-0.762867	-1.28497	-1.4107	-1.02301	-0.993602	-0.277006	-1.08947	-0.476385	-1.01539	1.13892	1.11776	1.22202	1.29668	0.0495974	0.963931	1.37903	-0.498325	1.0448	-0.00266584	1.47143	1.5866	0.521071	1.44645	-0.29384
ACP1	no	yes	no	no	no	-0.760173	-0.408935	-0.538137	-0.787162	-1.18242	-0.797683	-0.469241	-1.21766	-1.19774	-1.08523	-0.957736	-0.353004	-0.751969	-0.804564	-1.01983	0.866432	0.700644	1.4921	1.55352	0.593335	1.64862	1.54885	-0.304649	0.980847	-0.566844	1.07344	0.829764	-0.303041	1.64843	0.570046
SNRPG	no	yes	no	no	no	-0.387488	-0.588239	-0.300432	-0.311277	-0.808986	0.0197439	-1.24998	-0.996445	-0.909557	-1.18102	-1.24887	-0.279313	-0.619978	-0.423236	-0.985637	1.47128	1.31387	1.07864	1.57781	-0.121686	1.06083	1.0861	-1.31039	1.23857	-0.487027	1.49196	1.23259	-0.435432	1.49818	-0.424595
HSPD1	no	yes	yes	no	no	-0.972087	-0.833929	-0.774167	-0.727747	-1.14045	-0.413097	-1.28903	-1.04322	-1.12755	-0.933435	-0.790041	-0.742459	-0.408086	-0.78076	-1.09878	1.2527	1.41692	0.454528	1.28074	0.0899277	1.46952	1.68053	0.404019	0.921924	-0.422031	1.06237	1.04233	0.107414	1.47106	0.842905
CCNA2	no	yes	no	no	yes	-0.433606	-0.272522	-0.689239	-0.099924	-0.90064	-0.238541	-0.731217	-1.25172	-0.686854	-1.00957	-0.771082	-0.517259	-0.884712	-0.743036	-1.2541	1.15697	1.72679	0.0692046	1.63538	-0.405753	1.49575	1.59815	-0.149533	1.36405	-1.07892	1.00694	1.3517	-0.451874	1.3875	-0.222321
G3BP1	no	yes	no	no	yes	-0.506738	0.213544	-0.61054	0.099229	-0.717604	0.13216	0.217722	-1.82698	-1.11383	-0.425392	-0.489555	0.0457816	-0.28765	0.298719	-0.637284	1.29024	1.18461	-0.17207	1.34554	-0.276595	1.72072	1.61805	-0.646299	0.859254	-2.39529	0.469211	0.828545	-1.41362	1.33243	-0.136315
NHP2	no	yes	no	no	no	0.538928	-0.00455982	-0.741948	-0.160981	-0.241087	0.134533	1.13796	-0.0243796	-1.49857	-0.363613	-0.380964	0.539183	-1.53107	0.262583	-0.115736	0.280808	0.251364	2.38348	0.428382	-0.753504	-1.33125	-0.00879249	-2.02579	-0.366956	0.0127209	1.13481	1.10571	1.48387	1.37884	-1.52395
POLE3	no	yes	no	no	no	-0.364082	-0.472096	-1.00394	-0.184254	-0.798867	-0.146738	-0.541357	-1.40249	-0.724098	-0.989949	-0.526504	-0.285853	-1.19777	-0.301353	-1.00168	1.24037	1.54128	0.479164	1.50882	-0.409143	1.46847	1.44924	-0.397384	1.41254	-1.19807	1.25177	1.31214	-0.309845	1.36784	-0.776151
RPS3	no	yes	no	no	no	0.00904301	-0.555826	-0.212698	-1.05665	-1.09774	-0.608564	0.344382	0.163063	-1.446	-0.911797	-1.00096	-0.168821	-0.204519	-0.581541	-0.333197	0.166484	0.20628	2.95084	0.228807	-0.791475	-0.580457	0.444422	-0.838077	-0.17907	0.823794	1.08892	1.30782	2.22127	1.29185	-0.679585
CCT5	no	yes	no	no	no	-0.347777	-0.472629	-1.04122	-0.461313	-0.993768	-0.236275	-0.332841	-1.32916	-0.923684	-0.782619	-0.610128	-0.230257	-1.21673	-0.351487	-0.743909	1.24515	1.38053	0.401541	1.38055	-0.672416	1.21863	1.37306	-0.743277	1.10897	-0.912524	1.56933	1.56848	-0.278497	1.81248	-0.378209
EIF4E	no	yes	no	no	no	-0.778325	-0.407244	-0.603667	-0.24968	-0.446019	0.1001	-0.912507	-0.929248	-0.390451	-0.888197	-0.684606	-0.832659	-0.367912	-0.666327	-1.34392	1.43523	1.43904	-0.573189	1.88707	0.0776636	1.26721	1.69056	-0.977188	1.49989	-0.82268	0.857491	1.15787	-1.13907	1.23712	0.363651
HNRNPU	no	yes	no	no	yes	-0.68056	-0.358475	-1.65855	-0.880605	-1.65807	-0.728331	-0.644669	-0.805279	0.747445	-1.29677	0.889063	1.04025	0.553669	0.849788	-0.412952	0.51217	0.860069	-0.08344	0.574731	-2.32614	1.7117	1.00468	0.674507	1.36261	-0.568078	0.969548	0.53344	-0.231421	0.582939	-0.53326
TOMM70	no	yes	no	no	no	-0.995429	-1.09227	-0.73196	-0.0690661	-0.357941	-0.432099	-1.35324	-1.30686	-0.677812	-0.663968	-0.697302	-0.696035	-0.348731	-0.636383	-1.19596	0.771432	1.59902	0.393572	1.30468	0.962931	1.72086	1.61326	0.171716	1.49889	-0.832327	0.0901062	0.53711	-0.942426	0.918363	1.44786
BUB3	no	yes	no	no	yes	-0.797981	-0.20669	-0.475039	-0.826776	-0.935234	-0.141607	-0.83128	-0.863567	-1.27955	-1.00024	-1.2849	-0.842272	-0.70427	-0.751832	-0.714634	0.882959	1.39499	0.395526	1.43639	-0.141662	1.65057	1.70205	0.0218111	1.33315	-1.00221	1.0386	1.28016	-0.372357	1.34371	0.69217
VBP1	no	yes	no	no	no	-0.723735	-0.308349	-0.150418	0.163298	0.108912	-0.755756	-1.55202	-1.29174	-1.46499	-0.257103	-1.29238	-1.01574	-0.139881	-0.684585	-1.14748	0.481189	0.914951	0.066394	1.41822	1.39916	0.84848	0.949193	0.150127	1.6339	-0.0325593	0.67367	0.123467	-1.23595	0.958056	2.16368
U2AF1	no	yes	no	no	no	0.685919	0.522389	-0.750653	0.183433	-0.497858	0.436956	0.0348954	-0.609465	-0.313055	-0.960597	-0.000840746	-0.470499	-1.57617	0.145241	-1.3693	1.70732	1.15328	0.190692	0.373256	-1.60119	0.84815	1.19892	-1.2547	0.298914	-1.3344	1.48869	1.53522	0.0748942	1.35358	-1.49303
SRSF2	no	yes	no	yes	yes	0.852876	0.777689	-1.14277	0.444885	-0.571832	0.761386	0.444784	-1.48114	0.204686	-1.06831	0.418417	0.0875232	-1.63868	0.238621	-0.955635	0.949079	1.02487	-0.497757	0.795626	-1.54793	0.907085	0.878477	-0.98231	0.744908	-1.46717	1.12383	1.18187	-0.32541	1.433	-1.59065
EIF4A1	no	yes	no	no	no	-0.61003	1.02548	-0.990853	0.028447	-0.460907	0.0991297	0.474478	0.631624	1.42648	-0.896172	0.474844	1.70213	-0.293026	0.775195	-1.37015	-0.195146	-0.145035	0.159224	0.705302	-2.6409	0.423454	0.733272	-1.02609	1.03409	-1.62853	1.25564	0.51057	-0.336191	0.528429	-1.39476
USP1	no	yes	no	yes	no	-1.01824	-0.818351	-0.313311	-0.0909831	-0.668827	-0.154106	-1.35568	-1.31936	-0.638698	-0.757448	-0.602074	-0.588439	-0.318465	-0.909108	-1.12117	0.988951	1.54091	-0.253845	1.54208	0.6789	1.94868	1.59997	0.753594	1.5912	-1.05276	0.511734	0.462079	-1.00576	0.590563	0.777942
CCT3	no	yes	no	no	no	-0.0632507	-0.0654447	-1.32906	-0.289437	-1.25013	0.0746123	-0.0398184	-1.37386	-0.891446	-0.760722	-0.381827	0.158982	-1.26599	0.303216	-0.466592	0.946297	1.02104	1.24077	1.09731	-1.06321	0.592199	0.980496	-1.15436	0.761985	-0.767949	1.47394	1.6418	0.0142968	2.066	-1.20984
RFC4	no	yes	no	no	no	-1.06583	-0.746633	-0.482661	-0.509337	-0.572441	-0.654723	-1.18025	-0.693837	-1.11755	-0.304926	-1.14218	-0.69836	-0.606686	-0.704307	-0.786874	1.3546	1.23271	0.372356	1.59192	-0.447266	1.47258	1.58289	0.0543853	1.17949	-0.889577	1.33413	1.3904	-0.158709	1.60449	-0.407794
GNL3	no	yes	yes	no	no	-1.16187	-1.11274	-0.0205893	-0.892016	-0.904723	-0.399374	-0.771281	0.0417648	-1.63594	-0.33137	-1.64021	-0.893924	-0.0802026	-1.23993	-0.888849	0.533601	0.695582	1.16787	1.06113	0.735272	-0.057926	0.515969	0.114398	-0.546406	1.4237	1.27196	1.23202	0.92752	2.11691	0.739659
MAD2L1	no	yes	no	yes	yes	-0.894801	-0.659454	-0.285636	-0.152017	-0.494163	-0.326567	-0.868192	-0.657097	-1.07237	-0.907147	-0.961083	-0.680252	-0.445594	-0.74485	-1.06097	1.29292	1.6955	-0.0003313	1.54639	-0.0689808	1.61389	1.53528	-0.285603	1.4253	-1.38816	1.01558	1.21126	-0.735091	1.37884	-0.0266144
ABCE1	no	yes	no	no	no	-0.883906	-0.533713	-0.384376	0.191634	-0.694267	0.148834	-1.14074	-1.22648	-0.618305	-0.988912	-0.352682	-0.319162	-0.181957	-0.915281	-1.25898	1.09604	1.62695	-0.441535	1.56155	0.205105	1.77867	1.61501	0.347226	1.44389	-1.38326	0.529249	0.702003	-1.43638	0.734596	0.779164
PRDX3	no	yes	no	no	no	-1.08562	-0.840845	0.215178	-0.788859	-0.687327	-0.301012	-1.08695	-0.916966	-1.67869	-0.546413	-1.15991	-0.771876	-0.202819	-0.690592	-0.695418	0.691762	1.32506	1.01496	1.40659	1.09535	1.24946	1.33587	-0.376308	1.39155	-0.617121	0.434488	0.343614	-0.933056	1.09085	1.78505
HPRT1	no	yes	no	no	no	-0.915277	-0.42929	-0.655817	-0.291785	-1.16779	-0.296852	-0.647562	-0.724967	-1.0093	-1.01662	-0.683929	-0.528954	-0.810938	-0.677944	-1.19039	0.933056	1.44747	0.131221	1.60249	0.400876	1.71839	1.57322	-0.106599	1.80891	-1.01344	1.10453	0.908233	-0.976568	1.01738	0.498229
DDX21	no	yes	no	no	no	-0.569613	-0.297056	-0.936009	-0.459885	-1.23656	-0.22945	-0.692932	-1.29305	-0.3472	-0.863003	-0.101937	0.0927613	-0.0421222	-0.375913	-1.0903	1.40468	1.68086	-0.513807	1.26192	-1.19384	1.66002	1.62632	0.370793	0.908622	-1.38358	1.35472	1.23241	-0.759214	1.08436	-0.292009
NOLC1	no	yes	yes	yes	yes	-0.187885	-0.171422	-1.64132	-0.228491	-1.20884	-0.479252	-0.129971	-1.16796	-0.312978	-0.567867	-0.0846859	0.260217	-0.465546	0.42523	-0.441082	1.22605	1.01493	0.0359217	0.972008	-2.2151	1.45907	1.08937	0.0237686	1.0352	-1.21325	1.51271	1.5837	0.00175527	1.15847	-1.28275
CCT2	no	yes	no	no	no	-0.358563	-0.128464	-1.07084	-0.26473	-1.04032	0.154045	-0.636635	-1.59473	-0.898144	-0.892822	-0.566943	-0.029767	-1.13054	-0.396655	-0.824193	1.15123	1.44517	0.555947	1.60714	-0.406139	1.27226	1.66674	-0.690917	1.23393	-1.0125	0.940373	1.1938	-0.670073	1.67661	-0.284259
MCM7	no	yes	no	yes	no	-0.382808	-0.258881	-1.32836	-0.478866	-0.996108	-0.553953	-0.209822	-0.948335	-0.444172	-0.607007	-0.236642	-0.0563739	-0.940477	-0.0926851	-0.405822	1.22855	1.20235	0.361276	1.17763	-1.81507	1.08849	1.24528	-0.141646	1.11545	-1.10824	1.61072	1.52928	0.290972	1.63371	-1.47845
PHB	no	yes	yes	no	no	0.553267	-0.183289	-0.610871	-0.577476	-0.505245	0.0207915	0.192131	-0.730501	-1.06475	-0.880118	-0.270074	0.588815	-1.32359	-0.349615	-0.16947	1.20065	0.909015	1.25082	0.427922	-1.1404	0.259972	0.953461	-2.00846	0.616574	-0.838638	1.62181	1.51589	0.819314	1.57105	-1.84901
SNRPD1	no	yes	no	no	yes	-0.456101	-0.391412	-0.801832	-0.535826	-1.06242	-0.469394	-0.577514	-0.776014	-0.883938	-1.0051	-1.14365	-0.0741327	-0.797622	-0.477333	-0.728508	1.43602	1.46442	0.521226	1.34754	-0.752638	0.900983	1.34463	-1.00229	0.74259	-0.690274	1.82308	1.61713	0.26638	1.74856	-0.586562
RRM1	no	yes	no	no	no	-0.802818	-0.762232	-0.468887	-0.558765	-0.767849	-0.474083	-1.10636	-0.946065	-1.16246	-0.447566	-0.701397	-0.654563	-0.384195	-0.738722	-0.596616	1.47716	1.62393	-0.138411	1.60639	-0.395145	1.41891	1.45777	-0.456902	0.993415	-0.785066	1.45313	1.4248	-0.465837	1.67448	-0.316041
PCBP1	no	yes	no	no	no	0.602439	0.0816022	-1.65369	-0.430167	-0.969152	-0.289975	0.5433	-2.26193	-0.493301	0.176971	0.271826	0.409231	-1.68247	1.122	0.47646	1.09672	0.812169	0.494831	0.887458	-1.18817	0.252211	0.128949	-0.894585	0.359944	-0.656561	1.35842	1.36326	-0.038748	1.6389	-1.51796
CNBP	no	yes	no	no	no	-1.41896	-0.375546	0.709894	-0.483888	0.0255478	-0.619104	-1.03137	-0.267251	-1.89274	-0.29314	-1.90821	-0.759792	0.903886	-0.450824	0.0122208	0.265799	1.60027	1.93286	1.32876	-0.388561	0.874629	1.33895	-0.721865	1.18346	-1.30793	0.227824	0.500288	-0.217086	0.8381	0.393772
UBE2E1	no	yes	no	no	no	-0.0410396	-1.23252	-0.750599	-0.659643	-0.94436	0.232184	-0.725095	-1.52349	-0.989768	-0.558493	-1.16614	-0.452954	-0.35661	-0.910735	-0.815072	1.56224	1.92794	0.737532	0.751652	0.632648	1.66622	1.61582	-0.369258	1.33063	-0.944723	0.68472	0.775956	-0.677642	0.830956	0.369635
HNRNPA3	no	yes	no	no	no	-0.829019	-0.47444	-0.958801	-0.953157	-1.19487	-0.399574	-0.540042	-0.34411	1.28617	-1.18544	1.26117	1.59689	2.05416	1.35705	-0.232079	-0.151308	0.244026	-0.770101	0.273399	-2.04159	1.4202	0.751704	0.83293	0.933806	-0.942948	0.296539	-0.354167	-0.881529	-0.0221751	-0.0326884
RSL1D1	no	yes	no	no	no	-0.435304	-0.613032	-1.11089	-0.0629679	-1.5542	-0.275452	-0.217084	-1.13563	-0.594882	-1.06244	-0.843261	-0.504951	-0.987886	-0.356438	-1.20838	1.10198	1.22918	0.831105	1.44436	-0.400385	1.47808	1.73744	-0.319998	0.864974	-1.1035	1.18589	1.22958	0.186769	1.56973	-0.0724181
CTPS1	no	yes	no	yes	no	0.380044	0.0723124	-0.83475	0.10783	-0.950591	-0.158535	-0.114777	-0.45121	-0.341844	-0.905337	0.147353	-0.0154376	-0.761854	0.365902	-0.993705	1.60647	0.869215	-0.28202	1.15008	-1.80221	1.19407	1.11176	-0.359265	0.936382	-1.51366	1.45675	1.267	-0.255199	1.29412	-2.21891
SMARCC1	no	yes	no	no	yes	-0.633707	-0.0708599	-1.42111	-0.943465	-1.29646	-1.31511	-0.495256	-0.580995	0.176516	-0.539381	0.659309	0.737769	0.105098	0.429428	-0.238343	1.61862	0.639222	-0.798173	0.828784	-2.3672	1.62175	1.22566	0.118742	1.64703	-0.457983	1.01848	0.713936	-0.5031	0.868113	-0.747314
EIF1AX	no	yes	no	no	no	-0.861525	-0.777748	-0.828637	-0.435627	-0.715997	-0.275212	-0.976829	-1.0653	-1.22594	-0.91518	-0.793756	-0.940228	-0.603035	-0.962083	-0.947564	0.931901	1.48889	0.265691	1.6016	0.710986	1.69822	1.54623	0.420577	1.43032	-0.821803	0.727729	0.725841	-0.5115	1.29366	0.816314
PSMD1	no	yes	no	no	no	0.224391	0.268036	-0.185649	0.828647	-0.712487	0.26432	-0.629898	-0.850939	-0.434707	0.758287	0.133712	0.353583	0.369488	-0.317563	-0.349946	1.3083	1.09123	-1.4132	1.02838	-1.66072	1.25362	1.11333	-0.846937	-0.148639	-2.15881	0.878592	1.44304	-1.98952	1.02174	-0.639678
TYMS	no	yes	no	no	no	-0.211662	-0.186335	-0.466349	-0.11674	-0.628189	-0.278667	-0.208097	-0.982584	-0.657736	-0.66669	-0.301644	-0.147024	-0.939639	-0.222111	-0.620196	1.39186	1.34902	0.0317306	1.44482	-1.40734	1.57877	1.3408	-0.468345	1.1956	-1.96533	1.19934	1.38751	-0.345973	1.3264	-1.42521
AP3S1	no	yes	no	no	no	-0.989469	-1.36882	-0.146108	0.273609	-0.0788097	1.30085	-0.87035	-1.19846	-0.895505	-1.66009	-1.38068	-0.375927	0.29763	-1.01274	0.31415	-0.220301	1.56575	1.71724	0.677554	1.69334	1.21368	1.12292	0.641192	0.646433	-1.15273	-0.697543	-0.628191	0.00724874	0.419057	0.785084
IMPDH2	no	yes	no	no	no	-0.136233	-0.445972	-0.524019	-0.553347	-0.959639	-0.865634	-0.0812527	-0.780073	-1.70428	-0.757559	-0.883287	-0.206436	-0.66914	-0.201713	-0.168502	1.02669	0.88909	1.74177	1.20281	-0.944567	0.226985	1.10622	-0.821962	0.773368	-0.670104	1.43467	1.38665	1.12073	1.89638	-1.43164
COX5A	no	yes	no	no	no	0.334695	-0.388908	-0.330409	-0.599355	-0.144599	-0.158759	0.793422	0.184725	-1.87826	-0.299413	-1.19385	0.200652	-0.517432	-0.221987	0.578285	0.934167	0.772761	2.12099	1.21889	-1.59588	-0.210917	0.388625	-1.21544	-0.56686	-0.807903	0.880294	0.684804	0.973583	1.90053	-1.83646
TUFM	no	yes	no	no	no	0.73529	0.114371	-0.450696	-0.00275948	-0.55914	-0.77542	0.529802	-0.771039	-1.15737	-0.0989067	-0.597251	0.19859	-1.27284	0.331381	0.317886	0.553961	0.487248	2.05855	0.242632	-1.62236	-0.330208	-0.0138524	-1.04925	-0.504833	-0.263128	1.17198	1.1967	2.14874	1.45969	-2.07777
CYC1	no	yes	no	no	no	0.904972	0.378239	-0.547736	-0.042616	-0.217247	0.108751	0.522792	-0.578226	-0.940092	-0.817373	-0.744307	-0.107179	-0.885249	0.191332	-0.166242	0.38619	0.710988	2.19281	0.547996	-1.4188	-0.697183	0.345915	-2.14047	0.409029	-0.718403	1.40546	1.45293	0.906854	1.42923	-1.87236
NPM1	no	yes	yes	no	no	-0.892814	-0.976911	-0.590484	-0.648829	-1.14225	-0.438645	-1.1145	-0.990928	-1.08379	-1.05714	-0.991299	-0.49762	-0.271075	-0.717214	-0.922189	1.23281	1.49195	0.868217	1.34935	-0.119571	1.3058	1.63311	-0.000879373	1.15852	-0.533224	1.18676	1.25956	-0.045353	1.57043	-0.0218065
KPNA2	no	yes	no	yes	yes	-0.21435	-0.262759	-1.05477	-0.0228226	-0.9609	-0.229451	-0.279727	-1.55313	-0.566868	-0.788953	-0.495359	-0.478796	-1.03548	-0.139089	-0.704387	1.23394	1.36448	-0.470895	1.46067	-0.619516	1.42655	1.42969	-0.682142	1.40717	-0.932742	1.29656	1.42157	-0.761097	1.7821	-0.569487
RUVBL2	no	yes	no	no	no	0.223659	-0.0388408	-1.25851	-0.935613	-1.22839	-0.551226	0.692694	-1.44973	-0.763029	-0.518618	0.0423542	0.195183	-1.28058	0.52514	0.448164	0.728488	0.493362	1.90995	0.52647	-1.81471	0.295392	0.589936	-0.60487	1.10135	-0.287318	1.41652	0.869582	1.04291	1.40883	-1.77852
XPOT	no	yes	no	no	no	-1.52042	-1.20242	0.546427	-0.990187	0.184451	-0.66429	-1.59695	0.0359339	-1.29559	0.090475	-1.30268	-1.17123	0.43607	-1.34147	-0.233334	0.173534	0.420942	0.869098	0.29442	2.04204	0.436608	0.475709	1.49166	0.197121	1.09821	-0.256029	0.013259	0.460934	0.131599	2.17608
UBE2L3	no	yes	no	no	no	0.786736	-0.389957	-0.66867	0.196376	-0.981261	-0.00296159	0.225613	-0.966351	-0.98257	-0.566804	-0.229123	-0.0997791	-1.45988	0.260811	-0.86019	1.28295	0.775	0.920956	1.31871	-0.647921	0.247004	0.906302	-1.7833	0.976788	-1.21845	1.45249	1.41016	0.272891	1.5802	-1.75577
LAS1L	no	no	yes	no	no	-0.187081	-0.0789471	-1.11735	-0.600891	-1.43551	-0.498419	-0.463733	-0.612286	0.50954	-0.864261	0.582557	1.10823	0.0811949	0.941626	-0.0264222	0.329914	0.501667	-0.164593	0.587943	-3.06017	0.957214	1.03018	0.224614	1.05274	-0.764862	1.4742	0.751183	-0.0159019	1.36134	-1.60371
AK2	no	no	no	yes	no	-0.105703	-0.537682	-0.940648	-0.543101	-1.12907	-0.0555219	-0.541341	-0.849896	-0.958773	-1.18556	-1.01869	-0.518573	-1.32493	-0.0523096	-1.15713	0.985394	1.4389	1.30732	1.00215	-0.608095	1.20444	1.15909	-0.33717	0.999619	-0.535224	1.33931	1.40452	0.55512	1.84376	-0.840201
CDC27	no	no	no	no	yes	-0.841462	-0.722926	-0.172054	0.095028	-0.500029	0.242749	-1.01529	-1.38669	-0.590902	-0.4851	-0.723274	-0.595876	-0.414505	-1.00043	-1.06764	1.01468	1.29851	-0.502246	1.1754	1.19382	1.69998	1.62342	0.373079	1.42727	-1.02149	0.223747	0.33971	-1.84404	0.743127	1.43343
UPF1	no	no	no	no	yes	0.0397834	0.229861	-1.76463	-0.472892	-1.19862	-0.866481	-0.115375	-0.833244	0.633075	-0.515091	1.37151	0.722232	-0.127479	1.09245	0.135559	0.791989	0.948204	-0.600308	0.188145	-3.1789	1.01634	0.412084	0.228643	0.677076	-0.184371	1.12794	0.92463	0.0412516	0.699128	-1.42251
LIG3	no	no	no	no	yes	0.241961	-0.220484	-1.39979	-1.07627	-1.48631	-0.655905	0.139653	-0.484987	-0.275061	-0.253371	-0.415564	0.0521802	-0.682542	-0.0695891	-0.309989	1.66463	1.34672	-1.21825	1.01526	-1.16426	0.79429	0.79717	-0.601168	0.910179	-0.331736	1.84411	1.6062	0.0147388	1.68596	-1.46778
DBF4	no	no	no	no	yes	-1.02255	-0.765042	-0.148588	-0.429849	-0.903906	-0.30798	-1.02751	-0.702581	-0.753172	-0.237077	-0.879159	-0.619813	-0.103239	-0.532002	-1.46053	1.41038	1.40611	-0.580472	1.55638	0.357199	1.72617	1.51319	-0.0207832	1.66749	-1.17134	1.10042	0.893478	-1.17882	0.810177	0.403418
PAFAH1B1	no	no	no	no	yes	-0.572899	-0.56363	0.423818	0.651617	0.880471	-0.472081	-1.60307	-0.528446	-0.744319	0.546623	-0.979772	-0.664023	-0.687318	-0.811314	0.084616	-0.329367	-0.267268	-0.710195	0.227027	2.49008	0.105143	-0.121382	0.404719	0.622897	1.30877	-1.02373	-0.491389	-0.733187	0.527987	3.02962
E2F2	no	no	no	no	yes	-0.622803	-0.380764	-1.39111	-0.584801	-0.294723	-1.02396	-0.211297	-1.03139	-0.0992425	-0.451076	-0.0987077	-0.264955	-1.25288	-0.36889	-0.236292	1.42578	1.42681	-0.133263	1.30437	-1.55959	1.15992	1.02622	0.283428	0.821999	-0.862268	1.46854	1.41635	0.626152	1.56887	-1.66044
NCAPD2	no	no	no	yes	no	-0.102305	-0.14869	-0.854487	-0.274539	-0.395863	-0.584757	-0.409912	-0.801211	-0.577809	-0.212635	-0.261046	-0.305351	-0.994737	-0.133122	-0.0723203	1.67425	1.35386	-0.762677	1.6494	-1.19336	1.29763	1.08248	-0.891803	1.20051	-1.1297	1.45089	1.50512	-0.512257	1.24487	-1.84042
BRCA1	no	no	no	yes	no	-0.677385	-0.521186	-0.208429	-0.249128	0.369361	0.00594331	-1.05289	-0.628674	-0.426957	0.220594	-0.359673	-0.29155	-0.315332	-0.27071	-0.61648	1.44862	1.60081	-1.57699	0.751342	-1.17827	1.44777	1.68984	-0.0968581	0.784098	-1.8657	1.44548	1.34884	-1.05568	1.21337	-0.934169
UBR7	no	no	no	yes	no	0.0898576	-0.0119219	-0.537442	0.580539	-0.188239	-0.522599	-0.764205	-0.00679902	-0.979493	-0.445843	-0.336619	-0.305738	-0.694345	0.392056	-0.0069636	1.70706	0.778824	-0.500711	1.37065	-1.32194	1.50472	1.05455	-1.21229	1.23005	-2.31367	0.907634	1.38604	-0.985031	1.21464	-1.08276
TACC3	no	no	no	yes	yes	-0.0516609	-0.247446	-1.4059	-0.348251	-1.06174	-0.523616	0.106345	-1.22728	-0.239037	-0.70639	0.185379	0.170267	-1.17165	0.308267	-0.175466	1.05973	1.0266	-0.448488	1.11107	-1.99786	1.31759	1.00487	-0.504075	1.13931	-0.783186	1.60488	1.51839	0.113364	1.59057	-1.36457
POLA2	no	no	no	yes	yes	0.524153	-0.174056	-0.966513	-0.143009	-0.208662	-0.002009	0.52752	-0.25503	-0.228459	-0.447305	0.311837	0.071436	-0.864914	0.246162	-0.42232	1.35279	1.13104	-0.112811	0.846348	-2.12548	0.813445	0.945006	-0.453652	0.807201	-2.0185	1.14669	1.21309	-0.0446644	1.17602	-2.64535
MNAT1	no	no	no	no	yes	-1.03112	-1.38843	0.320206	0.177945	0.00224667	-0.67836	-1.47412	0.173677	-0.4284	-0.474161	-0.947608	-1.23229	0.943655	-0.74394	-1.42174	0.337678	-0.0802465	-0.162478	0.63428	1.77237	1.53984	0.828034	0.819957	1.46269	-0.175165	-0.463546	-0.741769	-0.733284	0.866786	2.29729
MRE11	no	no	no	yes	no	-0.977683	-0.874264	-0.14176	0.23625	-0.529777	-0.341355	-1.12287	-0.0719103	-0.665861	-0.253197	-1.28784	-0.85294	0.384303	-0.805017	-0.777942	1.31639	0.78963	-0.73737	1.76028	-0.268993	1.67865	1.53441	-0.125969	1.48913	-1.29755	1.03808	1.05658	-1.65421	0.866036	0.636796
DEPDC1	no	no	no	yes	no	-0.340735	-0.461163	-0.16603	-0.144467	-0.430927	0.27523	-1.0268	-0.927756	-0.280286	-1.05095	-0.0567033	-0.194379	-0.216895	-0.480274	-1.46695	1.47004	1.43916	-0.977236	1.22714	0.130671	1.83497	1.44266	-0.310935	1.57938	-1.49615	0.979772	0.730189	-1.97468	0.368695	0.525402
HMGB3	no	no	no	yes	yes	0.702559	0.22902	-0.905813	0.0711498	-0.968376	-0.0080881	-0.5262	-1.06338	0.310158	-1.78101	-0.749951	0.759415	-0.843839	0.705848	-0.681274	0.828759	0.928291	-0.650334	0.541702	-1.22285	0.301153	1.19678	-1.59729	0.721757	-0.572939	1.89292	1.4198	-0.195458	2.02966	-0.872175
ARID4A	no	no	no	no	yes	-1.1112	-0.751659	0.347007	-0.210075	0.0382626	0.57537	-0.658626	1.72828	1.37384	-0.209432	1.42481	1.23339	1.47548	-0.0742785	-1.24073	-1.68781	-0.124254	-0.509102	0.326359	-0.649509	-0.0471731	0.200441	1.73027	0.871653	-0.642935	-1.72299	-0.520618	-1.18987	-0.870891	0.895981
RFC1	no	no	no	yes	no	-0.50454	-0.221416	-0.314976	-0.102038	-0.819449	-0.184069	-0.68228	-1.194	-0.680109	-0.424331	-0.357712	-0.353041	0.0450166	-0.373886	-1.1939	1.53011	1.63331	-0.864649	1.32015	-0.973787	1.36608	1.79944	0.117789	0.452082	-1.51854	1.22594	1.36595	-0.961185	1.61354	-0.745491
CUL3	no	no	no	no	yes	-0.985228	-0.62201	-0.523063	-0.16138	-0.0125854	-0.600217	-1.29563	-1.05007	-0.86095	-0.575368	-1.13021	-0.529837	0.0209396	-0.859056	-0.588012	1.06578	1.16084	-0.600418	1.03141	1.14781	2.23076	1.28904	0.0474469	1.36084	-0.714224	0.050104	0.11943	-0.966337	0.261009	2.2892
RFC2	no	no	no	yes	no	-0.194588	-0.329376	-0.781665	-0.295398	-0.799319	-0.378843	-0.731909	-0.903448	-0.718664	-0.678906	-0.543017	-0.0533083	-1.25496	-0.380266	-0.781327	1.12272	0.854111	0.962272	1.0796	-0.988783	1.32669	1.56556	-0.431856	0.979723	-1.29331	1.47432	1.72811	0.521822	1.52588	-1.60188
POLQ	no	no	no	no	yes	-0.229238	0.0929253	0.0258664	0.167448	-0.59372	0.663123	0.0716949	-0.0898452	0.0372763	-0.721662	0.455006	-0.12422	-0.755056	-0.566609	-1.47846	1.86497	0.950791	-1.43866	0.873738	-1.38278	1.21745	1.4118	0.324256	0.839264	-2.37287	1.37008	1.16436	-0.83448	0.187173	-1.12962
FOXN3	no	no	no	no	yes	0.205468	0.0306947	1.41908	0.478893	1.90048	0.277119	0.0278473	1.70738	0.172701	1.70423	-0.249603	-0.227272	1.31227	0.326433	1.26438	-1.06887	-1.08348	-1.07652	-1.08293	0.604959	-0.562133	-1.25351	-0.1031	-0.697473	-0.139858	-1.67105	-1.25127	-0.480779	-1.11076	0.626675
MRTO4	no	no	yes	no	no	-0.107694	-0.0552497	-1.11619	-0.462743	-1.55166	-0.0711963	0.491809	-0.654817	-0.413652	-1.34073	-0.060386	0.564758	-1.18937	0.567824	-0.484288	1.4164	1.00589	0.288896	0.734114	-1.34655	0.941079	1.18309	-0.290759	0.91877	-1.4789	1.2847	1.38648	0.126887	1.54412	-1.83064
POLD1	no	no	no	yes	no	-0.648602	0.0774105	-1.26932	-0.69603	-1.1444	-0.699769	0.0276961	-0.902276	-0.117257	-1.03373	0.285355	0.242483	-0.330459	0.304859	0.379528	0.963169	1.06191	0.258555	0.598498	-2.52889	1.32191	0.896338	0.0571501	0.930159	-0.896504	1.50015	1.22578	0.550185	1.38281	-1.79671
SLC12A2	no	no	no	no	yes	-0.53593	0.0109448	0.449819	0.529125	0.935244	0.232118	-0.762601	-0.0499993	0.159375	0.347444	-0.222374	-0.472373	0.72149	-0.698643	0.0257783	-0.708765	-0.576502	-1.06974	0.0550064	2.63412	0.121696	-0.309795	1.02991	-0.126044	0.518364	-1.47301	-1.1782	-1.49311	-0.958218	2.86488
MTHFD2	no	no	no	yes	no	-1.19339	-1.19488	0.193882	-1.3513	0.168367	-1.06174	-1.23602	0.100062	-1.5073	0.03845	-1.33568	-1.12257	0.344585	-1.28349	0.146207	0.128823	0.210197	1.24219	0.192557	1.84578	0.211237	0.109751	1.12505	0.150381	1.66858	-0.096082	0.086144	1.19797	0.278033	1.94421
BCL3	no	no	no	no	yes	0.481736	0.0642244	1.07807	0.669471	0.159233	-0.810249	1.26638	-0.487492	0.305403	1.63656	1.70548	1.18935	0.0446979	-1.15868	-0.727562	-2.42039	1.10534	0.01954	-0.540783	-1.28472	0.562917	-0.827272	-0.637379	-1.0779	0.192697	0.203377	-0.837365	0.949219	0.600123	-1.42402
TCOF1	no	no	yes	no	no	-0.211435	-0.0976278	-1.35821	-0.642045	-1.45621	-0.768012	-0.340416	-0.603182	0.640177	-0.917053	0.933402	0.935773	0.330952	0.970992	-0.0215975	0.712555	0.835218	-0.390073	0.689716	-2.7629	1.3365	1.01885	0.36617	1.18273	-1.07079	1.18233	0.738981	-0.244034	0.500418	-1.49118
ING3	no	no	no	yes	no	-0.964586	-0.565694	0.741751	-0.566855	0.341657	0.432909	-0.752116	0.28923	-0.706411	0.0257489	-1.03856	-0.82829	-0.190525	-0.182826	-1.11887	0.309391	1.77314	-0.0566831	1.97921	0.502489	1.2701	0.775978	-0.955837	1.40429	-1.32889	-0.22674	-0.138102	-2.37921	1.13776	1.01654
TRIP13	no	no	no	yes	no	-0.338329	0.103593	-1.16468	-0.024817	-0.577766	-0.384515	0.127373	-0.868103	-0.263626	-0.390282	-0.375819	-0.378406	-0.999881	0.218088	-0.620455	1.54044	1.19091	-0.327825	1.44638	-1.43316	1.38519	1.39914	-0.633404	1.19917	-1.74938	1.37057	1.34107	-0.684682	1.24193	-1.34871
TFRC	no	no	no	yes	no	-0.86332	-0.520146	-0.318345	-0.317472	-0.632056	-0.167228	-0.935736	-1.00852	-0.735932	-0.571943	-0.47055	-0.371359	-0.159991	-0.557927	-0.869651	1.56832	1.6843	-0.736911	1.39871	-0.547774	1.82466	1.72132	0.115422	0.980726	-1.64446	1.01261	1.13157	-1.06319	1.2624	-0.207523
SMC1A	no	no	no	yes	yes	-0.49448	-0.494356	-1.3517	-1.20518	-1.47147	-1.00384	-0.472146	-0.334216	0.9418	-0.783545	1.31846	1.14617	1.37359	1.40236	0.268396	0.186008	0.309856	-0.386344	0.234543	-2.76184	1.09999	0.742488	0.873057	0.846773	-0.615447	0.841658	0.423262	-0.0419432	0.251436	-0.843335
HMMR	no	no	no	yes	yes	-0.907562	-0.955228	-0.208494	-0.48957	-0.547316	-0.1894	-0.664344	-1.03247	-0.679493	-0.592313	-0.852509	-0.838445	-0.263159	-0.867647	-0.952311	0.970577	1.59726	-0.886628	1.75717	0.628899	1.71899	1.62458	-0.496035	1.56926	-0.877309	0.780834	0.831481	-1.09134	0.883121	1.02941
EED	no	no	no	yes	no	-0.699652	0.0317483	-0.232465	0.250038	-0.972551	-0.086501	-0.697315	-1.1105	-0.120116	-1.1866	-1.26907	0.206479	0.38952	0.050745	-1.17568	0.542097	1.33204	-0.458552	0.859104	-0.405769	1.63684	1.97561	0.242958	1.80919	-1.95299	1.2059	-0.00258297	-1.38075	0.391828	0.827021
TIPIN	no	no	no	yes	no	-1.03951	-0.0430113	-1.15188	-0.130826	-0.922185	0.18069	-0.340644	-1.48933	-0.346662	-0.660251	-0.17216	-0.203422	-0.767285	0.524944	-1.25756	1.15808	1.38504	0.312718	1.53362	-1.13994	1.59628	1.3795	-0.580421	1.45653	-1.38757	0.688605	1.11335	-0.644517	1.43871	-0.490894
RASAL2	no	no	no	no	yes	0.507668	0.279406	1.34569	0.622823	1.92873	0.0998044	0.115337	0.611464	-0.0555046	2.05941	0.230989	-0.0135616	0.0172581	-0.100214	2.46428	-0.926826	-1.42894	-0.937369	-0.558268	0.593124	-0.987201	-1.22821	0.242556	-1.22028	-0.484774	-1.61812	-0.34079	-0.493362	-0.45669	-0.268439
MLH1	no	no	no	yes	no	-0.574313	-1.07872	-0.083838	-0.428349	-1.29412	-0.744896	-0.497914	-0.94985	-1.02406	-0.979072	-0.502836	-0.444707	-0.860136	-0.550867	-0.323947	1.47629	1.49698	-0.0651672	1.11774	0.174961	1.17535	1.66115	-0.930759	0.718187	-0.681067	1.6193	1.81925	-0.310312	1.54349	-0.477772
UNG	no	no	yes	yes	no	0.0941969	-0.103451	-1.17001	-0.218152	-1.09166	0.0262787	-0.0801043	-1.22309	-0.550992	-0.839891	-0.0751072	-0.0958567	-1.22943	-0.213801	-0.662961	1.28867	1.387	0.591262	1.3231	-1.40338	1.09005	1.15876	-0.269614	1.16985	-1.67226	1.46872	1.24973	0.140702	1.31277	-1.40134
SPAG5	no	no	no	yes	no	0.161005	0.162187	-0.718487	-0.197537	-0.815111	-0.296224	-0.367816	-0.895368	-0.420099	-0.317654	-0.185362	0.212201	-1.09891	0.101048	-0.358406	1.38282	1.09776	-0.825516	1.35716	-1.39965	1.16444	1.06611	-1.20718	1.05212	-1.09445	1.51484	1.58248	-0.910635	1.78325	-1.52902
UBE2T	no	no	no	yes	no	0.138364	-0.14511	-0.141427	-0.612138	-0.538566	-0.164571	-0.645617	-0.726122	-0.810432	-0.301274	-0.574636	-0.39279	-0.563575	-0.498123	-0.592403	1.1106	1.41134	0.582577	0.991665	-0.868573	1.1838	1.41498	-1.24347	1.15605	-1.61815	1.30425	1.59564	-0.652323	1.86853	-1.6685
EXOSC5	no	no	yes	no	no	-0.0924963	-0.630936	-1.19255	0.139959	-0.246088	0.592249	0.26261	-0.642027	-1.1496	-1.31007	-0.642888	-0.0366391	-1.69141	-0.315127	0.487573	-0.162167	0.772394	1.49015	-0.254942	-0.108448	-0.890158	1.16756	-1.12161	0.088424	-0.629556	1.9498	1.96154	1.688	1.31622	-0.799764
POLD3	no	no	no	yes	no	0.56287	-0.777062	-0.46531	0.28253	-0.25473	-0.0509693	-0.612755	-1.04212	-0.551981	0.307718	-0.621067	-0.13955	-1.09466	-0.822521	-0.751203	1.65113	1.55689	-0.361447	1.36746	-0.992313	1.60691	1.26856	-0.397766	1.21263	-1.87355	0.931987	1.06717	-0.717336	1.07605	-1.36556
KIF22	no	no	no	yes	yes	0.598848	0.309198	-1.09218	-0.217064	-0.841808	0.00132836	-0.0385351	-0.87891	-0.540422	-1.19522	-0.074263	0.189767	-1.27188	0.0744155	-0.832368	1.29385	0.999663	0.106674	0.888247	-1.71191	1.04043	1.2378	-1.16331	0.840888	-1.10692	1.89557	1.44863	-0.0191498	1.398	-1.33937
RBL1	no	no	no	no	yes	-0.736561	-0.204098	-0.830481	-0.146143	-0.486748	0.447639	-0.712511	-1.33704	-0.512227	-0.801571	-0.720044	0.0885749	-1.26999	-0.161855	-0.773171	1.29615	1.52999	-1.07706	1.1771	-0.285411	1.66495	1.73621	0.521173	0.72152	-1.62513	0.983311	1.34813	-0.672152	1.38039	-0.542933
NDC80	no	no	no	no	yes	-0.862842	-0.612302	-0.839392	-0.0975601	-0.468507	0.0524759	-0.884392	-1.27141	-0.791031	-0.671002	-1.18686	-0.50672	-0.525621	-0.692258	-0.883916	1.35015	1.74465	-0.483426	1.67194	-0.12011	1.69073	1.75768	-0.0570145	1.20292	-0.994544	0.905572	0.861298	-0.908188	1.17824	0.441434
PDS5B	no	no	no	yes	yes	-0.654633	0.0469331	0.926829	-0.0231746	-0.779807	0.309992	-0.261108	-0.7119	-0.0335284	-0.716411	-0.263811	-0.275901	0.453778	-0.925633	-1.98785	0.906241	1.52273	-1.04626	1.03273	-0.0623412	1.72136	1.5747	0.895422	0.909056	-2.21997	0.426049	0.434008	-1.69593	0.0471241	0.451316
YTHDC1	no	no	no	no	yes	-0.91806	-0.619072	-0.976533	-0.81466	-1.19352	-0.469366	-1.2458	-0.524508	1.08036	-0.765956	0.738255	0.396513	1.29746	1.66141	0.395763	0.532677	-0.333954	-0.838803	-0.0957525	-2.92928	1.14864	1.20577	0.991198	0.757393	0.113477	0.98495	0.108186	0.0669334	0.661988	-0.415708
ATRX	no	no	no	no	yes	-0.510007	0.203238	0.0706162	-0.0557163	-0.0129929	0.494177	-0.80742	0.545118	1.33914	0.327291	1.0441	1.08096	2.6652	0.875372	0.0407746	-1.18825	-0.985173	-0.984365	-0.833764	-0.785798	-0.85011	-0.196789	1.98197	-0.835786	-0.063503	-1.17449	-0.670011	-0.421281	-1.44276	1.15025
RAD54L	no	no	no	no	yes	0.280246	-0.108067	-0.670462	-0.34063	-0.354007	-0.0526398	0.457864	-0.499274	-0.0278087	-0.244251	0.120713	-0.0279339	-1.05171	0.0829137	-0.643723	1.45385	1.25994	-0.5819	1.07723	-2.11441	1.14264	0.85329	-0.210747	0.664484	-1.79413	1.44728	1.11267	-0.187161	1.32607	-2.37032
ZW10	no	no	no	yes	no	-0.942134	-0.537672	-0.365574	0.00734077	-0.20158	-0.37778	-0.454144	-1.35789	0.0268638	-0.692219	-1.10702	-0.34738	-0.334008	-0.747145	-1.03257	1.60901	1.45123	-0.654352	1.62227	-0.350671	1.57664	1.63782	-0.272933	1.36079	-1.39323	1.25292	0.885906	-1.32247	0.927022	0.132962
AURKA	no	no	no	yes	yes	-0.456762	-0.289528	-1.05376	-0.498433	-1.07697	-0.542782	-0.189217	-1.33942	-0.689379	-0.785353	-0.630149	-0.546491	-0.97231	-0.10785	-0.652269	1.22763	1.49704	-0.09803	1.68946	-0.666526	1.42727	1.56388	-0.635204	1.55508	-0.685219	1.10715	1.4041	-0.389258	1.50469	-0.671389
TPX2	no	no	no	no	yes	-0.497297	-0.616907	-1.06146	-0.189419	-0.839978	-0.637215	-0.734401	-1.17151	-0.732528	-0.647647	-0.566427	-0.299399	-1.21118	-0.517612	-0.751422	1.49186	1.42151	-0.449136	1.49696	-0.623438	1.4619	1.35461	-0.270507	1.29834	-0.569107	1.31489	1.63918	-0.173067	1.62607	-0.545658
BIRC5	no	no	no	yes	yes	-0.160414	-0.267239	-1.19715	-0.201765	-0.777646	-0.514856	-0.104806	-1.24407	-0.854932	-1.19142	-0.498159	-0.355543	-1.29459	-0.54024	-0.922123	1.37794	1.36949	0.152788	1.57937	-0.317657	1.24261	1.39912	-0.867207	1.38937	-0.563309	1.35851	1.38794	-0.30355	1.5725	-0.652953
KIF4A	no	no	no	yes	yes	-0.542144	-0.501982	-0.838199	-0.318745	-0.597154	-0.635452	-0.166984	-0.465491	-0.462976	-0.334139	-0.859531	-0.342741	-0.337372	-0.511785	-0.620888	1.9512	1.46391	-1.27558	1.44503	-1.41636	1.32922	1.42689	-0.831832	1.13877	-0.510344	1.38285	1.33816	-0.414707	1.47356	-0.965189
MAP3K20	no	no	no	no	yes	-0.890738	-1.09447	-0.518629	-0.0604094	-0.117472	-0.154436	-1.29459	-1.47473	-0.30189	-0.260971	-1.62976	-1.00417	-0.827055	-1.10434	-0.484833	1.06921	0.876003	-0.642349	1.62382	1.14485	1.38934	1.35271	0.481524	0.957716	-0.350252	1.0115	0.961023	-0.943754	1.39837	0.888797
ORC6	no	no	no	yes	yes	-0.111126	0.0699082	-0.538988	0.0419651	-0.673278	-0.113621	-0.161439	-1.16664	-0.326159	-0.812851	-0.324403	-0.503005	-0.448138	-0.177331	-1.05033	1.49942	1.08968	-0.120274	1.33179	-1.1825	1.37986	1.60768	-0.350371	1.05711	-2.09523	1.23923	1.39232	-0.381979	1.32866	-1.49996
NUP50	no	no	no	no	yes	0.131885	0.468756	-0.438155	0.231327	-0.346447	0.125368	-0.328592	-1.1249	-0.371827	-0.258551	-0.218995	0.0679344	-1.01636	-0.201257	-0.718532	1.38346	1.38984	-0.730976	1.0585	-1.4937	1.51753	1.36905	-0.380895	0.958928	-2.19605	0.976863	1.27195	-0.975727	1.30852	-1.45893
CDC6	no	no	no	no	yes	-0.357023	-0.326208	-1.13179	-0.558975	-1.06642	-0.484499	-0.569728	-1.07855	-0.600498	-1.01092	-0.422793	-0.386864	-1.31071	-0.755741	-0.966473	1.26841	1.41011	0.47573	1.58201	-0.540978	1.4925	1.43764	0.200497	1.26042	-0.945715	1.34226	1.43038	-0.026382	1.29195	-0.651651
CBX5	no	no	no	yes	no	-1.45962	-1.1126	-0.00272586	-0.670128	0.68545	-1.23019	-1.36134	-0.530605	-0.817372	0.466851	-1.18866	-1.24689	0.043987	-0.848765	0.116688	0.399728	0.59731	-0.207102	0.867125	2.40564	1.08394	0.227165	1.00995	0.853596	0.830563	-0.468489	-0.391566	-0.327695	-0.0114211	2.28717
MSH2	no	no	no	yes	no	-0.157103	-0.497628	-1.11624	0.170439	-0.403972	0.131131	-1.05337	-0.787217	-0.737191	-1.196	0.0781113	0.199283	-0.643626	-0.188546	-1.42496	1.52726	1.48464	-0.0452638	1.00578	-1.2072	1.61138	1.47633	-0.278655	1.56762	-1.52692	1.04809	1.45321	-0.565023	0.693641	-0.618011
ABL1	no	no	no	no	yes	0.0309739	-0.0808254	-0.803651	-0.594371	-0.301742	-1.88001	0.399423	0.463054	0.0376761	0.538034	0.88359	0.800957	0.0672675	0.874789	0.732129	0.399588	0.446705	0.397547	-0.25245	-3.30366	0.034673	-0.848026	0.562092	0.733902	-0.151946	0.314124	1.08806	1.11101	0.550868	-2.24978
CDC7	no	no	no	no	yes	-0.888913	-1.05525	-0.386298	-0.234169	-0.123102	-0.155574	-0.44575	-0.418998	-1.07211	-0.259924	-0.480217	-0.205254	-0.0946936	-1.17237	-0.904047	1.06625	1.33622	-0.676774	1.85655	-0.0444221	1.67733	1.82325	-0.121546	1.32519	-1.67038	1.10799	0.91563	-1.36406	1.07844	-0.412986
PES1	no	no	yes	no	no	-0.35685	-0.267584	-1.58691	-0.313819	-1.74451	-0.414414	0.0137878	-1.34777	0.243906	-1.02476	0.676159	0.77715	-0.276411	1.12087	-0.124358	0.58802	0.742254	0.650464	0.646752	-2.66965	0.978361	0.81503	0.0439161	1.22073	-0.6953	1.2004	1.17757	0.183139	0.93902	-1.1952
HIRA	no	no	no	no	yes	1.27511	0.199983	0.432756	-1.54059	0.376324	-2.72621	-0.353753	0.427953	-0.627421	-0.731984	2.10726	1.15589	-0.782466	-0.421157	0.40397	-0.80652	-0.215701	-0.375628	-0.120608	-1.56294	0.910062	0.555608	-0.21308	1.21047	0.647835	0.280405	0.459673	0.000137796	1.15291	-1.11829
CENPM	no	no	no	yes	no	-0.42303	-0.386403	-1.12115	-0.934858	-1.1251	-0.675938	-0.509094	-1.03408	-0.711223	-1.2785	-0.360561	-0.51237	-0.966477	-0.322249	-1.21638	0.700454	1.13039	1.54232	1.1549	-0.625047	0.843481	1.40179	0.0873933	1.20986	-0.476984	1.5544	1.59545	0.881114	1.35833	-0.780425
PHF5A	no	no	no	yes	no	-0.455541	-0.0942544	-1.15902	-0.646993	-0.977913	0.12151	0.290638	-1.21147	-1.3014	-0.755564	-0.696875	-0.226682	-0.918212	-0.325647	-0.553802	0.803256	1.46141	1.61293	1.31572	-0.63805	0.897679	1.24269	-1.23305	1.01286	-0.693518	1.13561	1.44507	-0.202168	1.76147	-1.01069
PRMT5	no	no	no	no	yes	-0.225932	-0.302438	-1.24845	-0.64842	-1.20775	-0.839861	-0.138413	-1.15478	-0.899711	-0.756655	-0.528218	0.147007	-1.15143	-0.0491013	-0.323496	0.941225	1.23301	1.32974	1.14881	-1.29709	0.692988	0.904919	-0.517925	0.968333	-0.312901	1.63297	1.51953	0.553371	1.85343	-1.32275
CDKN3	no	no	no	yes	yes	-0.713284	-0.61658	-0.891527	-0.571818	-1.13861	-0.42648	-0.689793	-1.24012	-0.991247	-0.554801	-1.08349	-0.688173	-0.661027	-0.164032	-0.869767	1.60305	1.1377	0.146819	1.47012	0.190105	1.2945	1.60361	-0.632944	1.27414	-0.436312	1.47409	1.47432	-0.615552	1.43356	-0.116473
HIF1A	no	no	no	no	yes	-1.3079	-0.268317	1.07516	-0.246405	0.339503	-0.70365	-1.56352	-0.408745	-0.722873	0.706544	-0.88465	-0.832754	1.18602	-1.26949	-1.0922	1.39989	1.24537	-1.25607	0.376196	1.12164	0.135912	1.1421	1.07329	-0.426561	-0.2564	0.290847	0.851119	-1.76888	0.404081	1.66073
RPS6KA5	no	no	no	no	yes	-0.225489	-1.0647	1.86424	-0.775251	-1.06323	-0.887189	-1.17595	1.08631	-1.10619	-0.242082	-0.730073	-2.56355	0.471023	-0.46438	-0.210081	0.848441	0.594458	0.80923	-0.501453	0.946316	0.246603	1.5099	1.40165	-0.454281	-0.247697	0.0556835	0.223411	-0.430834	0.528099	1.55706
BRMS1L	no	no	no	yes	no	-1.01633	-0.592362	0.126846	-0.140058	0.119273	0.170225	-0.743454	-0.376411	1.47583	-0.569075	-0.17405	1.20151	1.45076	0.213507	-1.06112	-0.260888	0.211247	-1.77389	0.235613	-0.144364	1.68119	0.773468	1.24042	0.858282	-1.7566	0.192641	-0.401348	-2.20158	-0.272293	1.533
PNN	no	no	no	yes	no	-0.323925	-0.10744	-1.16261	-0.903842	-1.50204	-0.616007	-0.266011	-0.140223	1.3705	-1.13853	1.26918	1.41406	0.908205	1.23062	-0.42726	0.272249	0.389809	-0.649694	0.14211	-2.99196	0.985999	0.592088	0.929037	0.360858	-0.630646	0.949205	0.550391	-0.0139709	0.47043	-0.960591
GINS1	no	no	no	yes	no	-0.41592	-0.521718	-1.04148	-0.311073	-0.298205	-0.376505	-0.520643	-0.856986	-0.825526	-0.713466	-0.602017	-0.494495	-0.946141	-0.516516	-0.567443	1.30384	1.70139	-0.0197667	1.64094	-0.408625	1.5908	1.51405	-0.624748	1.60973	-1.40278	1.06685	1.25652	-0.473621	1.27898	-1.02542
MYBL2	no	no	no	yes	yes	-0.117896	-0.414283	-0.91411	-0.465349	-0.802429	-0.371149	-0.0842656	-0.937634	-0.67443	-0.482067	-0.581598	-0.0283313	-0.874817	-0.120143	-0.155675	1.43336	1.2461	-0.00267107	1.10976	-1.52401	1.00144	1.16527	-0.68021	1.10354	-1.22367	1.65771	1.55839	0.370166	1.66977	-1.86075
CDC25B	no	no	no	yes	yes	-0.628992	-0.392636	-0.69427	-0.688241	-0.365268	-1.04156	-0.89797	-0.982061	-1.34129	-0.52366	-0.717921	-0.358263	-1.16082	-0.706621	0.106571	1.49514	1.07268	-0.325551	1.56855	-0.654352	0.757822	0.927566	-0.606847	1.13787	0.00224773	1.84456	1.71017	0.57173	1.74967	-0.858257
E2F1	no	no	no	no	yes	0.0191766	-0.14599	-1.17252	-0.653698	-0.583989	-0.64041	0.0374034	-1.04496	-0.563235	-0.267317	-0.0729718	-0.191426	-1.35571	-0.325669	-0.198706	1.0209	0.965052	0.712176	0.895471	-1.51235	1.08751	1.15799	-0.472287	0.925357	-1.14809	1.50904	1.6144	0.887291	1.58079	-2.06324
SUV39H1	no	no	no	yes	yes	-0.795802	0.0146632	-1.10238	0.0176698	-0.85024	-0.0345974	0.405903	-0.669651	-0.629226	-1.25934	-0.753426	-0.624119	-0.670557	0.0333939	-0.0472691	1.06036	1.07572	0.548713	1.32847	-2.14879	1.30286	1.81852	-0.634461	0.314878	-1.29968	1.61703	1.40619	0.267744	1.03417	-0.726745
RBBP7	no	no	no	yes	no	-0.604569	-0.554545	-0.683458	-0.344096	-0.964409	-0.120513	-0.910782	-1.13338	-0.787052	-0.684743	-0.943956	-0.270942	-0.345195	0.193337	-0.932867	1.31023	1.63777	0.144189	1.34215	-0.790989	1.28997	1.2104	-0.62304	1.01843	-1.19831	1.28047	1.33357	-0.36391	2.17924	-0.682996
CTCF	no	no	no	yes	yes	-0.0753136	-0.630561	-0.347218	-0.511876	-0.23844	-0.352951	0.0525754	-0.28083	0.376504	0.866517	0.0969341	0.836188	0.700594	1.81877	1.43121	0.932096	0.590191	-1.27237	0.868275	-2.88864	0.548303	0.458948	-0.577379	0.130212	-1.1754	0.585231	0.360153	-1.41394	0.871389	-1.75917
SLC7A5	no	no	no	no	yes	-1.01337	-1.12028	0.415994	-1.08186	0.44181	-1.09431	-1.2362	0.291413	-1.09444	0.572012	-0.931836	-1.0132	0.309935	-0.887792	0.624235	-0.502733	-0.297768	1.25797	-0.172321	1.88635	-0.564357	-0.42165	1.27011	-0.210912	2.11332	-0.429227	-0.270139	1.39237	-0.0615898	1.82847
CCP110	no	no	no	yes	no	-0.80015	-0.239934	-0.611007	0.192434	-0.675649	0.0907282	-1.13356	-0.76771	-0.307087	-0.608189	-0.468232	-0.152787	-0.279989	-0.497696	-1.91395	1.14471	1.54325	-0.393142	1.28868	-0.475922	1.54916	1.70485	1.03388	1.29973	-1.92692	1.02233	1.18039	-0.927506	0.202827	-0.0735322
NBN	no	no	no	yes	no	-1.2526	-0.803231	0.430967	0.576993	0.13455	0.187363	-0.990219	-0.386803	-0.316012	-0.797094	-1.05966	0.10219	0.542452	-0.719315	-0.665635	0.680038	1.4281	-1.39709	1.04424	0.443756	1.42223	1.85209	0.0549924	1.62823	-1.66088	-0.0578862	0.106493	-1.94345	0.178138	1.23706
SQLE	no	no	no	no	yes	-0.955245	-0.591822	-0.390372	0.00811907	-0.112951	-0.988741	-1.7165	-0.469847	-1.08423	-0.495543	-0.900918	-1.00069	-0.805058	-0.385511	-0.951205	1.1759	1.34278	-0.409252	0.851549	1.79705	1.34071	1.13615	-0.61582	0.592031	0.962936	0.834604	0.659128	-0.992211	0.0876265	2.07733
RNASEH2A	no	no	no	yes	no	0.0567	-0.554947	-0.998908	-0.688603	-0.560321	0.129205	-0.279012	-0.708252	-1.38198	-0.770515	-0.758857	-0.26905	-1.20829	-0.19864	-0.759625	1.17227	1.00963	1.28395	1.04679	-1.24692	0.781382	1.09212	-0.897476	1.11334	-0.657282	1.82115	1.31294	0.779983	1.65272	-1.31349
ASF1B	no	no	no	yes	no	0.419594	0.0565351	-1.48402	0.0891197	-0.731445	-0.200531	0.243637	-1.64533	-0.293474	-0.79318	-0.238719	0.0442513	-1.23142	0.254131	-0.495846	1.27135	0.991924	0.500888	0.881229	-1.50568	1.17311	1.26338	-0.460877	0.960331	-1.55711	1.29802	1.25027	0.31426	1.36595	-1.74034
CCNE1	no	no	no	yes	no	0.907322	0.297525	-1.05171	0.544194	-0.855663	0.851094	0.945449	-1.62612	0.0574309	-0.761778	0.958544	1.05721	-1.09283	0.152941	-1.26257	0.915261	0.660418	-0.372821	1.1664	-1.24993	0.896445	0.865129	-0.822935	0.282569	-2.2622	0.88006	0.952169	-0.40314	0.793922	-1.42239
TGFB1	no	no	no	no	yes	0.232855	0.852497	-0.319986	-0.440283	-0.17234	0.187203	1.29006	-2.55368	0.620383	0.496149	-0.169418	0.956413	0.406213	0.152356	-0.632469	-0.108601	1.51379	-0.850634	0.171561	-1.51082	0.341934	0.982431	1.4159	-0.49355	-0.576843	1.26149	-0.581292	0.205123	-2.55368	-0.122782
GRWD1	no	no	yes	no	no	0.71741	0.0469787	-1.66491	-0.428263	-1.1427	0.21956	0.604255	-1.29681	0.0666717	-0.372323	0.568953	0.450475	-0.788036	0.422543	-0.5986	0.932124	0.568982	0.350922	0.646255	-2.07958	1.25499	0.859337	-0.673874	0.78323	-1.24586	1.45925	1.15507	0.278395	1.0603	-2.15472
LIG1	no	no	no	yes	no	-0.0775194	-0.143145	-1.32947	-0.602489	-1.26058	-0.585487	0.0288736	-0.327758	0.244147	-0.607974	0.953524	1.05253	0.275505	0.470882	0.20949	0.646548	1.16063	-0.679532	1.0828	-2.81041	0.916288	0.904648	-0.475415	0.758566	-1.01598	1.41358	0.711403	0.191062	0.875001	-1.97972
TNPO2	no	no	no	no	yes	0.70594	0.415298	-1.04844	0.128869	-0.733963	0.216369	0.46227	-0.739192	0.734263	-0.313239	1.1883	0.493665	-0.777559	0.858228	-0.0607524	1.08135	0.615849	-0.604286	0.651362	-2.50699	0.915234	0.522403	-0.466938	0.570486	-1.77539	1.0893	0.781922	-0.7599	0.770442	-2.41491
RPA3	no	no	no	yes	no	-0.944292	-0.787646	-0.676783	-0.782975	-0.902471	-0.441163	-0.792158	-0.712804	-1.42979	-0.809223	-1.27071	-0.978989	-0.902184	-1.32507	-0.891361	0.810397	1.42008	1.08769	1.30696	0.595031	1.23352	1.28655	-0.323523	1.25808	0.18539	0.903375	0.779142	0.697885	1.27844	1.1286
EZH2	no	no	no	yes	yes	-0.936175	-1.0983	-0.314189	-0.908062	-0.75411	-0.748464	-1.19298	-0.948239	-0.995448	-0.411964	-1.27539	-1.04873	-0.604738	-1.11859	-1.38508	0.872153	1.48713	0.40787	0.89982	0.899001	1.19917	1.10214	0.462226	1.06676	0.290528	0.982107	1.26771	0.115677	1.54028	1.14789
SMC3	no	no	no	yes	no	-1.03244	-0.419391	-0.338917	-0.270939	-0.688578	-0.374397	-1.2092	-0.434148	-0.0124554	-0.980236	-0.250471	-0.288702	0.575912	-0.664581	-1.28313	1.25094	1.77201	-1.50106	1.09644	-1.14203	1.32977	1.78704	1.11897	1.25994	-1.36996	1.00393	0.982724	-0.523004	0.622965	-0.0169946
UBE2S	no	no	no	yes	yes	0.0525551	-0.301072	-1.47243	-0.471833	-0.849015	-0.521291	-0.0970059	-0.943342	-0.88422	-1.23151	-0.860511	-0.741958	-1.62958	-0.551668	-0.786354	0.939695	1.08402	1.24249	0.991549	-0.284393	0.746345	1.13287	-0.798112	1.0383	0.111356	1.40643	1.59475	1.14131	1.68672	-0.744085
RAD51C	no	no	no	yes	no	-1.14154	-0.419158	-0.585805	-0.377502	-0.87008	-0.0716445	-0.964507	-1.29971	-0.827557	-0.494682	-1.04982	-0.613559	-0.851618	-0.420715	-0.639528	1.15687	1.59593	0.562843	1.63955	0.130854	1.42515	1.44336	-0.676873	1.54381	-0.710351	1.18264	1.17372	-0.711713	1.41152	-0.539878
CBX1	no	no	no	no	yes	-1.09058	-0.752961	-1.5008	-0.694474	-1.0236	-0.699359	-1.20492	-1.13044	-1.22542	-0.556127	-0.666322	-1.08222	-0.648257	-0.121111	-0.599048	0.588342	1.17903	0.0813607	1.25536	0.0471897	1.2142	1.23692	0.219212	1.56864	0.751469	1.05589	0.829192	-0.120826	1.67489	1.41477
LUC7L3	no	no	no	yes	no	-0.770515	-0.666599	-0.453749	-0.489782	-1.45058	0.0547299	0.340843	-0.0585201	0.958996	-1.33053	0.702722	1.43412	1.36727	0.594945	-1.65673	0.240994	0.0699976	-1.38463	-0.0228562	-2.46701	0.997228	1.1521	1.41204	0.227823	-0.671524	1.26143	0.678128	-0.269854	0.260416	-0.060885
TMEM97	no	no	yes	no	no	-0.244695	-0.324514	-0.526652	-0.0961895	-0.977707	-0.31474	-0.0444915	-1.83832	-0.866748	-0.507778	-0.323996	-0.339683	-0.936012	0.360834	-0.255409	1.09591	1.35031	0.275724	0.851052	-0.670745	1.21939	0.848051	-0.783433	1.00907	-1.16709	1.64063	1.63858	-0.181835	1.91539	-1.8049
NSD2	no	no	no	no	yes	-0.662721	-0.53186	-1.05415	-0.618044	-0.935449	-1.0774	-0.379096	-0.806014	-0.133806	-0.578999	-0.331801	-0.394658	-0.787703	0.0308621	-0.323546	1.89635	1.2296	-1.12759	1.17153	-1.59607	1.47627	1.03473	0.298667	1.22456	-0.65225	1.3737	1.65289	0.212802	1.26851	-0.879319
HSPA8	no	no	no	no	yes	0.628695	0.214634	-1.65201	0.268676	-1.58327	0.453432	0.355778	-2.04688	-0.108562	-1.04637	0.0848015	0.491816	-1.48126	0.500929	-0.98371	0.979342	0.973623	0.430117	1.00429	-0.910786	0.811976	0.947156	-0.735441	0.794986	-0.880264	1.17114	1.25803	-0.524928	1.54213	-0.958089
NUP98	no	no	no	no	yes	0.187966	0.211011	-0.609228	0.403651	-0.976958	-0.0131391	-0.102746	-1.26121	-0.395844	-0.319429	0.112208	0.380176	-1.20208	0.0395802	-0.295721	1.8835	1.05517	-1.01356	1.33275	-0.905943	1.38819	1.17064	-0.782333	0.769319	-1.40927	1.05171	1.26672	-1.34353	1.17223	-1.79384
RAD51AP1	no	no	no	yes	no	-0.703523	-0.93846	-0.418035	0.0737288	-0.295646	-0.452689	-0.680293	-0.839516	-0.799977	-0.798748	-0.800379	-0.588609	-0.0810745	-0.564641	-0.950097	1.31425	1.52586	0.048593	1.70216	-0.586582	1.43345	1.7695	-0.0163793	1.10268	-1.61529	1.1815	0.918638	-1.13643	1.58138	-0.385375
CDKN1B	no	no	no	yes	yes	-0.787543	-0.787704	0.282918	-0.48218	0.976586	-1.0006	-0.516514	0.292448	-1.43567	0.0514733	-0.949978	-1.25397	-0.334859	-0.858086	0.00730832	-1.08525	0.0825779	1.20707	0.383621	2.3516	-0.130865	-0.538436	-0.289538	0.631173	1.61977	-0.479407	-0.381608	0.428919	0.27959	2.71717
SLC38A1	no	no	no	no	yes	-1.46144	-1.21144	0.566114	-1.15933	0.102038	-0.915929	-1.41237	0.0265272	-1.53996	0.205523	-1.42605	-1.07058	0.273743	-1.38701	-0.00494002	0.482382	0.525679	0.449149	0.309384	1.98505	0.536466	0.452376	1.33837	0.190892	1.13497	-0.0198425	0.191199	0.537606	0.159367	2.14207
NUP107	no	no	no	yes	no	-0.967367	-0.594767	0.15192	-0.36204	-0.864049	0.0628906	-0.906686	-0.685671	-0.939425	-0.731679	-0.926802	-0.788328	0.224322	-0.982429	-0.820389	1.58352	1.53992	-0.709647	1.77158	-0.429532	1.21625	1.69311	-0.329715	0.906458	-0.914054	1.10956	1.11121	-1.01126	1.61873	-0.0256301
TIMELESS	no	no	no	yes	no	-0.742343	-0.519008	-1.07778	-0.837233	-0.879579	-0.937828	-0.481359	-0.577269	-0.466153	-0.59236	-0.341669	-0.187602	-0.376578	-0.0847216	-0.314166	1.47001	1.37588	-0.00344367	1.09036	-1.73755	1.24293	1.14833	-0.293859	0.995158	-0.736252	1.69141	1.74016	0.0633421	1.67213	-1.30296
NOP2	no	no	yes	no	no	0.480993	0.673324	-0.553058	0.0892004	-0.845146	0.356052	0.447613	-0.454489	0.300016	-0.482802	0.667151	0.728992	-0.0743933	1.01329	0.0848724	0.671753	0.690443	-0.271207	0.415661	-2.89688	0.488758	0.525586	-0.809525	0.506693	-1.96354	1.01133	1.07361	-0.553315	1.10181	-2.42278
CDCA3	no	no	no	yes	no	-0.404263	0.0528739	-1.21201	-0.321676	-1.59697	-0.519202	0.278214	-0.923353	-0.595327	-0.5957	-0.457081	-0.437009	-1.82758	0.151238	-0.937671	1.26518	0.964063	0.102794	0.801127	-0.223125	0.991596	1.27193	-0.692248	1.16785	-0.548901	1.39531	1.84244	0.0475567	1.9595	-0.999554
ASF1A	no	no	no	yes	no	-1.01463	-0.978839	-0.304917	0.855839	-0.956606	-0.0305438	-1.02711	-1.07074	-0.549317	0.0152157	-0.422962	-0.725958	0.346047	-0.424158	0.0490169	0.350642	1.36493	0.958684	0.587632	0.852322	1.79435	1.20183	-0.431807	0.801607	-1.35307	-0.51412	0.145815	-2.37224	0.938841	1.91424
FBXO5	no	no	no	no	yes	-0.690943	-0.8557	-0.732164	-0.132522	-0.849252	-0.0415362	-0.987277	-1.34787	-0.464551	-0.67215	-0.522736	-0.370316	-0.649872	-0.45876	-1.03767	1.26985	1.49633	0.199589	1.61036	-0.439332	1.59796	1.45838	-0.0473572	1.65172	-1.33235	1.1201	1.26536	-0.380886	1.17464	-0.831042
MAPK14	no	no	no	no	yes	0.408082	0.731427	-0.489751	1.60764	0.0683655	1.86371	-1.0037	-0.408731	-0.0900382	0.732491	-0.97817	-1.11355	-0.42393	0.154079	0.100175	-1.37636	0.734374	-1.89628	0.123839	-1.15369	1.7225	0.0936362	-0.448538	1.56221	-1.54041	0.615946	0.566275	-0.177763	-0.932294	0.948454
MCM3	no	no	no	yes	yes	-0.0273533	-0.193319	-1.17575	-0.255766	-0.758826	-0.543816	0.0455495	-0.809442	-0.629538	-0.877439	-0.116733	0.0172582	-1.0029	0.0391285	-0.303938	1.55276	1.07542	0.271879	1.13738	-1.83511	1.11459	1.20134	-0.138285	0.816736	-1.41397	1.51358	1.36072	0.48873	1.38147	-1.93436
E2F3	no	no	no	no	yes	0.284814	0.210591	-0.943352	0.112395	-0.0544216	-0.136482	0.285384	-0.684389	-0.474006	-0.155959	-0.0982872	-0.133057	-1.17858	0.810808	-0.789677	1.4661	1.05328	-0.778033	1.22893	-0.431368	2.27614	1.4275	-0.320167	1.31983	-2.29809	-0.312514	0.611193	-1.68585	0.417647	-1.03037
BYSL	no	no	yes	no	no	0.402551	-0.0233912	-0.796558	0.0633629	-2.00509	-0.272838	0.600026	-0.783484	-0.170269	-1.05935	0.283767	0.595333	0.211807	0.857992	-0.324013	0.972307	0.795417	0.899646	0.375946	-2.86417	0.426932	0.683573	-0.526526	0.946207	-1.20897	0.983057	1.12075	0.155432	1.30301	-1.64244
PRPF4B	no	no	no	no	yes	-0.476926	0.0738978	-0.702063	-0.112428	-0.473974	0.854222	-0.40067	-0.447756	0.416539	-0.341584	0.155097	0.284869	0.316477	-0.456237	-1.05011	0.933796	1.15538	-1.95061	1.27582	-1.0919	1.78426	1.55447	-0.158956	0.750833	-1.75363	0.726762	0.689695	-2.32598	-0.0225796	0.793291
TTK	no	no	no	no	yes	-0.521729	-0.990423	-0.154911	-0.531131	-0.962365	0.18162	-1.50151	-1.02873	-0.723332	-0.616317	-0.896378	-0.538842	-0.378397	-0.8245	-0.935444	1.21876	1.52512	-0.443067	1.88536	0.592339	1.56932	1.48352	0.464045	1.42006	-0.704317	0.84177	0.828441	-1.42903	0.739355	0.430705
TENT4A	no	no	no	no	yes	0.216313	0.840032	-0.669325	-0.332714	-0.392386	0.388498	0.202973	0.27347	-0.458301	-0.27122	-0.40124	0.544472	-0.474729	0.00738194	0.0119446	1.66164	1.02857	-1.69387	0.813109	-1.86017	1.37783	0.996605	-0.0974986	0.590447	-2.17703	1.25352	0.661901	-0.6734	0.749339	-2.11616
LMNB1	no	no	no	yes	yes	-0.225166	-0.410306	-1.24603	-0.582307	-0.877885	-0.560385	-0.382588	-1.17931	-0.281488	-0.627487	-0.285314	-0.205454	-1.1681	-0.162735	-0.751885	1.43374	1.48871	-0.365547	1.19238	-1.17085	1.45781	1.33479	-0.250944	1.28905	-0.868935	1.57363	1.43157	-0.152	1.58573	-1.03271
RAD1	no	no	no	yes	no	-0.465686	-0.505125	-0.680993	0.126176	-0.0251045	0.173995	-0.367721	-1.73466	-1.20875	-0.42174	-0.74261	-0.487752	-0.71706	-0.851567	-0.92711	1.39731	1.18606	-0.113552	1.55322	0.173737	1.65265	2.00262	-0.758499	1.40047	-1.57143	0.592998	0.878135	-0.683659	1.09185	0.0338096
RAD50	no	no	no	yes	no	-1.01039	-0.98344	0.621257	0.569725	0.7759	0.632583	-1.50019	0.744131	0.684194	0.563017	0.486366	-0.290992	1.73799	-0.718365	-1.20531	0.455204	-0.335009	-2.3166	0.344702	0.126444	0.710574	0.75432	1.52738	0.472549	-0.723167	-0.354283	-0.428791	-1.77953	-0.974367	1.41411
SMC4	no	no	no	yes	yes	-0.966148	-0.470962	-0.558818	-0.228888	-0.305578	-0.124084	-1.18188	-1.02177	-0.449976	-0.825796	-0.485857	-0.636768	-0.4584	-0.924238	-1.34048	1.2916	1.51364	-0.926794	1.42878	0.12142	1.76089	1.48259	0.491825	1.86383	-0.959111	0.785863	0.880601	-1.16057	0.642169	0.762901
NCL	no	no	no	no	yes	-0.59955	-0.35654	-1.34483	-0.934187	-1.58519	-0.69002	-0.462814	-0.623802	0.876218	-1.13432	1.04155	1.18747	1.14969	1.15363	-0.316378	0.238409	0.63958	-0.169592	0.533745	-2.67022	1.33677	0.892463	0.61624	0.933039	-0.694482	0.953061	0.616934	-0.183382	0.606996	-1.0105
CENPA	no	no	no	no	yes	0.362419	0.407747	-0.914187	-1.12463	-0.191552	-0.437584	-0.95921	-0.899973	-0.699205	-1.74544	-0.565079	-0.513971	-0.725292	-0.694155	-1.58668	0.8354	1.2664	-0.048927	1.9692	-0.129714	1.40668	1.3117	-0.780033	1.62612	-0.420579	0.448593	1.23236	0.36792	1.34055	-0.13888
POLE4	no	no	no	yes	no	0.568656	0.401308	0.316097	0.0146594	-0.196633	0.620616	0.0626058	0.749897	-0.894406	-0.893109	-0.0642993	0.400166	0.175363	0.0578358	0.425198	-0.781996	0.689848	2.11757	-0.0542948	-1.91519	-0.625726	0.506705	-2.26096	0.186044	-0.724192	0.455043	0.798789	1.11645	1.24634	-2.49839
SFPQ	no	no	no	no	yes	0.27402	-0.0333402	-1.45925	0.118309	-0.515595	-0.0242929	-0.19484	-1.42619	-0.208542	-0.74917	-0.159185	-0.421917	-1.88249	-0.37364	-1.1773	1.55974	1.4263	-0.97812	1.19519	-0.452719	1.64854	1.07007	-0.444938	1.2846	-0.659136	1.19315	1.16631	-0.912997	1.3095	-0.172064
DR1	no	no	no	no	yes	-0.732009	0.0713552	-0.582189	0.191433	-0.419607	0.306276	-0.887965	-1.14749	-1.44806	-0.767617	-1.06712	-0.236978	-0.90999	-1.07668	-0.964819	0.925608	1.83966	0.65665	1.50512	0.704903	1.66409	1.70106	-0.664267	1.22889	-0.741206	0.447608	0.0430958	-1.03684	-0.0287261	1.42581
STMN1	no	no	no	yes	yes	-0.873668	-1.11615	-0.231089	-0.78691	-0.845724	-0.840505	-0.926322	-0.872869	-1.1458	-1.0239	-1.3885	-0.847339	-0.700066	-0.887918	-0.715796	1.32238	1.43994	0.360807	1.30803	0.522174	1.32584	1.2805	-0.187922	1.52428	-0.0493486	1.06704	1.09813	0.293348	1.47475	0.422617
NEK2	no	no	no	no	yes	-0.192122	-0.722983	-0.397401	0.290456	-0.700907	-0.457731	-0.809801	-0.756624	-1.33735	-0.52672	-1.07526	-0.636624	-0.786008	-1.12852	-1.43848	1.60504	1.29087	-0.88733	1.62834	0.756664	1.08702	1.02138	-0.500246	1.24566	-0.0317283	1.35517	0.99257	-0.832019	1.67754	0.267141
CENPF	no	no	no	no	yes	-1.01691	-0.761007	-0.768348	-0.835631	-0.701758	-0.692697	-1.13775	-0.760603	-0.381964	-0.682039	-0.503158	-0.477101	0.00073033	-0.487509	-0.678344	1.47448	1.55579	-1.5247	1.07777	-0.76947	1.43118	1.74512	0.524267	1.04393	-0.446813	1.30227	1.77372	-0.347792	1.08071	-0.0363681
RPA2	no	no	no	yes	yes	-0.470469	0.0710348	-0.919291	-0.295453	-0.915373	-0.0217105	-0.699417	-0.882965	-0.784734	-0.888081	-0.26803	0.00173801	-0.96458	-0.0956771	-0.408611	1.11717	1.17422	1.15018	1.31061	-1.1627	1.10952	1.53123	-0.797585	1.07372	-1.76018	1.29876	1.36294	-0.350649	1.63579	-1.1514
PPP1R8	no	no	no	yes	no	-0.028298	-0.205793	-0.768239	0.251979	-0.762241	0.147406	-0.329462	-1.72377	-0.441219	-0.706965	-0.382646	-0.250063	-0.76603	-0.140319	-1.77272	1.11028	1.59863	0.142259	1.01772	-0.412809	0.932016	1.57312	-0.905003	1.16279	-1.39988	1.27494	1.24675	-0.678169	1.85294	-0.637206
STAG1	no	no	no	yes	yes	0.411945	-0.106086	1.50514	0.557305	0.833556	0.170855	0.124586	0.355835	0.374469	0.278165	0.264489	0.361782	0.975765	-0.127939	-0.147043	0.890803	0.149493	-2.41723	0.160053	-1.71483	0.644999	0.971398	-0.946141	0.450262	-2.87012	0.495987	0.636095	-1.22613	0.154972	-1.21245
CASP8AP2	no	no	no	no	yes	-0.704397	0.0149465	-0.0777453	0.307405	-0.33429	-0.634818	-1.27185	-0.491223	0.0632186	-1.11646	-0.222435	-0.0294383	-0.124538	-0.577132	-1.48307	1.29614	1.33355	-1.52692	1.53973	-0.273234	1.94374	1.53318	0.29267	1.36036	-1.5397	0.796038	0.777035	-1.28594	0.729337	-0.294184
DCLRE1B	no	no	no	yes	no	0.0546328	0.0950305	-0.740577	-0.280001	-0.68384	-0.218952	0.0517108	-0.593219	-0.632405	-0.801796	-0.206191	-0.215984	-0.849931	-0.125383	-0.136385	1.54541	1.18389	-0.350868	1.25076	-1.5393	1.16612	1.29145	-0.315053	1.0272	-1.84087	1.57459	1.41366	-0.0363192	1.05541	-2.1428
HELLS	no	no	no	yes	no	-0.662221	-0.0409902	-0.927847	-0.0223506	-0.212027	0.397167	-0.41639	-0.794637	0.180534	-0.881905	0.137531	-0.298502	-0.606262	-0.40009	-1.19303	1.34793	1.3545	-0.997475	1.36753	-0.65883	1.80355	1.61338	0.562529	1.7184	-2.27134	0.703511	0.608052	-1.30205	0.0476509	-0.156315
RCL1	no	no	yes	no	no	0.560933	0.100638	0.0715557	0.712919	-1.14684	0.720057	0.372063	-0.349245	-0.427561	-0.613518	0.361781	1.15957	-1.40633	-0.359331	-2.12684	0.810169	0.161484	0.672161	0.644106	-1.95817	0.296174	1.26507	-0.415638	0.808891	-2.3143	0.832712	1.53538	0.263259	0.59195	-0.823088
EXOSC8	no	no	no	yes	no	-1.23965	-0.605934	-0.136416	-0.748584	-0.924679	-0.41482	-1.34566	-0.582392	-1.57235	-0.881798	-1.14001	-1.39653	-0.957226	-0.899433	-0.37831	1.12966	1.28281	0.672659	1.26869	0.986187	1.10869	1.25325	0.129058	0.65248	0.108713	1.01271	1.31624	-0.109835	1.40796	1.00452
UTP20	no	no	yes	no	no	-0.242688	0.171176	-0.344635	0.521642	-0.193343	0.307972	0.103246	-0.615129	0.401456	-0.221309	-0.328237	-0.0505412	-0.748867	-0.034385	-0.60119	1.57823	1.49517	-1.72146	1.09995	-1.2611	1.32312	1.27569	-0.771495	0.691265	-2.19179	1.115	1.14746	-1.56416	0.815918	-1.15696
TMPO	no	no	no	yes	yes	-0.599352	-0.476084	-0.871799	-0.18949	-0.517712	-0.402715	-0.576937	-1.38432	-0.752639	-0.93976	-0.499896	-0.664179	-1.02848	-0.615355	-0.761483	1.58829	1.53931	-0.345174	1.5304	-0.0379235	1.52376	1.55817	-0.315367	1.34452	-1.13884	1.2316	1.24213	-0.336066	1.42228	-0.526889
PMS2	no	no	no	yes	no	-0.766187	-1.07265	-0.318498	0.224941	0.896033	-0.396123	-1.25427	-0.0897799	-0.300566	1.2443	-1.69874	0.0318016	0.66354	-0.537576	0.756722	-0.407947	-1.30755	0.408866	0.437018	2.47776	-0.395552	-0.841723	0.0907824	-0.0732861	1.61234	-1.76804	0.241654	0.0366202	0.190876	1.91524
CIT	no	no	no	yes	no	-0.333403	-0.412579	-1.3579	-0.309392	-0.739957	-1.44467	-0.513453	-0.420406	0.104683	-0.443195	0.224923	0.0500087	-0.595286	0.302538	-0.083647	1.37159	1.32898	-1.6835	0.996537	-1.77168	1.45861	1.17226	0.0748614	1.23413	-0.529465	1.56626	1.32232	-0.321169	1.04449	-1.29249
CDKN2C	no	no	no	yes	yes	-0.0229109	-0.202596	-0.908991	-0.432975	-1.37255	-0.830024	-0.345398	-1.26746	-0.73498	-0.708722	-0.919599	0.431058	-1.93197	-0.196843	-0.209003	0.914682	0.653742	0.823211	1.20594	-0.469386	0.915134	0.533077	-0.952524	1.17197	0.781109	1.53207	1.57375	1.03613	1.4211	-1.48704
DDX39A	no	no	no	yes	yes	-0.183747	-0.453291	-0.669484	-0.714697	-0.511761	-0.526741	-0.152795	-0.704297	-1.18775	-0.761093	-0.418127	-0.340407	-0.716292	-0.380433	-0.170689	1.35798	1.28292	0.488983	0.991893	-1.36582	1.02061	1.39896	-1.49271	1.17989	-0.753979	1.77211	1.64057	0.137647	1.55357	-1.321
STIL	no	no	no	no	yes	-0.765091	-0.603966	-0.922133	-0.392873	-1.02341	0.103191	-1.09712	-1.13054	-0.779608	-0.804579	-0.538359	-0.404821	-0.714414	-0.670647	-1.01044	1.64985	1.52202	-0.545997	1.2176	-0.0848236	1.64641	1.52033	0.47997	1.47219	-0.901414	1.24457	1.21637	-0.614251	1.14296	-0.210969
AMD1	no	no	no	no	yes	-1.3304	0.0655426	1.68239	-0.143739	-0.863776	0.545863	-0.812538	0.662667	-0.980297	-0.825272	-0.792975	0.21823	1.55588	-1.19206	-1.48999	0.301204	1.37627	0.880265	0.681688	-0.656608	0.856457	1.22916	1.38162	0.134294	-2.40562	-0.31297	0.170182	-0.247335	0.170257	0.141612
NDUFAF4	no	no	yes	no	no	-0.665879	-0.889552	-0.26621	0.300379	0.300422	-0.0888818	-1.10227	-0.895679	-1.01485	-1.2527	-1.6693	-0.569637	-1.32541	-0.196871	0.497839	0.571463	0.886798	0.783507	1.14175	0.953999	1.10094	1.09924	-1.25369	1.4179	0.226903	-0.149716	0.179628	-1.20056	0.674147	2.40628
CKS2	no	no	no	yes	yes	-0.335002	-0.593772	-0.469986	-0.324192	-1.02012	-0.0899165	-0.451652	-1.50366	-1.12554	-0.944279	-0.791852	-0.550566	-0.651638	-0.585267	-0.455687	1.00909	1.4118	0.0442827	1.87997	-0.234945	0.954798	1.40414	-1.2745	1.48635	-0.549503	1.18431	1.36109	-0.574898	1.84968	-0.0585266
CSE1L	no	no	no	yes	no	-0.87319	-0.541721	-0.512077	-0.227721	-0.65858	-0.00105037	-1.00324	-1.41803	-0.632167	-0.55003	-0.481641	-0.369663	-0.377648	-0.739495	-0.966219	1.37351	1.67591	-0.4214	1.61406	-0.0935902	1.62022	1.52174	-0.0869685	1.42166	-1.39104	0.900533	1.12408	-1.28602	1.14467	0.235117
MPHOSPH10	no	no	yes	no	no	-0.795921	-0.696724	-0.863236	-0.0870997	-1.36195	-0.0520667	-0.439902	-1.13838	0.145677	-0.87706	-0.358279	0.245764	0.34803	-0.0686812	-1.22369	1.09733	1.12111	-0.508171	1.07173	-1.26302	1.76779	1.65867	0.444822	0.935716	-1.73441	1.32147	1.0065	-1.23226	1.15546	0.380787
CDKN1A	no	no	no	yes	no	0.852996	0.668114	0.225801	0.615564	1.00088	0.645121	0.774705	0.289552	0.300991	1.5472	0.487179	0.440988	-0.160674	0.53955	1.37541	-1.5362	-1.30881	1.37628	-1.16776	0.554406	-1.96096	-1.43114	-0.595001	-1.29798	0.800435	-1.16944	-1.22709	0.277772	-1.00046	0.0825495
NUP153	no	no	no	yes	no	-0.704707	-0.225332	-0.146074	0.0765028	-0.235654	0.487208	-0.907936	-1.11155	-0.173294	-0.243984	-0.166257	-0.202549	-0.414063	-0.231263	-1.06732	1.65041	1.34453	-0.637665	1.60961	-0.946079	1.70424	1.25836	0.260975	0.746966	-1.95839	0.926385	0.940289	-1.56245	1.18742	-1.25832
MT2A	no	no	no	no	yes	-0.729048	-0.745108	0.520679	-0.977516	0.237784	-0.778167	-0.678208	0.436364	-1.16256	0.804926	-0.511543	-0.402739	0.626683	-0.696274	0.926639	-0.835209	-0.709894	1.15524	-0.7537	1.7318	-1.25371	-0.72122	0.592455	-0.897539	2.29335	-0.441617	-0.136384	1.39923	-0.367597	2.07288
SNRPB	no	no	no	yes	no	0.310837	-0.260085	-0.987989	-0.350086	-0.862185	-0.384712	0.0158072	-0.971289	-0.936379	-1.10652	-0.419542	-0.381382	-1.5774	-0.270696	-0.466268	0.924232	1.25198	1.40112	0.808677	-0.971121	0.605368	1.02175	-1.07343	0.786445	-0.513403	1.47856	1.65396	0.935833	1.81506	-1.47714
DLGAP5	no	no	no	yes	no	-0.842612	-0.502252	-0.377505	-0.247247	-0.573337	-0.226387	-0.849293	-1.67004	-0.693481	-0.801922	-0.497883	-0.547416	-0.566295	-0.989446	-0.942294	1.13081	1.62511	-0.73563	1.61171	0.695103	1.5964	1.58891	-0.235347	1.40324	-0.889923	0.901571	0.76511	-1.04805	1.35713	0.561268
PAICS	no	no	no	yes	no	-0.747035	-0.734152	-0.47904	-0.457058	-0.816302	-0.372167	-1.07326	-1.11579	-0.848637	-0.538237	-0.83829	-0.482099	-0.458555	-0.852827	-0.998786	1.26186	1.55127	0.0797932	1.59971	-0.19682	1.60315	1.71418	-0.249108	1.53018	-0.972344	1.00847	1.0935	-0.546719	1.53916	-0.204039
E2F8	no	no	no	yes	no	-0.00212166	-0.125735	-0.721777	0.381243	-0.658368	0.0102703	-0.207033	-0.661586	-0.949532	-0.265045	0.182796	0.0374993	-1.20478	-0.0963744	-0.709573	1.57867	1.27792	-0.0428317	0.999081	-1.75805	1.42427	1.19388	0.10659	1.03493	-1.97768	1.44131	0.878155	-0.206274	1.00626	-1.96612
CCNT1	no	no	no	no	yes	-0.175754	0.295574	0.997064	0.197017	-0.503456	0.572327	-0.579525	-0.357512	-0.755755	0.0850213	0.294481	0.144647	0.751342	-0.62995	-1.2151	1.40011	1.02517	-1.80935	0.978959	0.965844	1.45405	1.11046	0.626989	0.549665	-2.45423	-0.25266	-0.15881	-2.29345	-0.296766	0.0335938
ILF3	no	no	no	yes	yes	-0.195709	0.201593	-1.51221	-0.306256	-1.20654	-0.53233	-0.0425973	-0.928531	0.304528	-0.464667	0.659121	0.555294	-0.295875	0.771774	0.0397968	1.03382	0.990465	-0.459004	0.810352	-2.61198	1.38226	0.945197	0.0399506	1.22274	-1.09246	1.26602	0.929447	-0.516898	0.874948	-1.86225
PPAN	no	no	yes	no	no	0.235546	-0.144012	-1.47059	-0.35247	-2.0761	-0.559696	0.552223	-0.211174	1.16814	-0.944548	1.30878	0.587158	0.8556	1.71265	-0.354737	0.496855	0.0557983	0.361481	-0.473432	-2.53458	0.763232	0.591493	-0.291664	0.45491	-0.510754	1.24878	0.481353	0.142585	0.601556	-1.69439
DNMT1	no	no	no	yes	no	-0.302198	-0.29581	-1.31733	-0.626177	-0.844896	-0.737068	-0.297251	-0.764617	-0.166876	-0.636419	0.295609	0.169348	-0.752737	0.369707	-0.0309714	1.20999	1.09607	-0.473587	1.03917	-2.18422	1.41832	1.02378	-0.0180512	1.28001	-1.10914	1.4817	1.49239	0.0080827	1.31394	-1.64077
DKC1	no	no	no	no	yes	-0.199113	-0.172941	-1.32228	-0.77593	-1.70979	-0.249653	-0.689319	-1.43079	0.445497	-1.14018	0.633225	0.534623	-0.0976995	0.669111	-0.175503	1.05853	1.04963	-0.0369967	0.662105	-2.41768	1.2221	1.04545	0.125174	0.927661	-0.554993	1.41245	1.02565	0.0867331	1.27509	-1.20016
GINS2	no	no	no	no	yes	0.0178736	-0.405891	-0.969285	-0.343907	-0.786396	-0.303236	0.1083	-1.16365	-0.663835	-0.880195	-0.335549	0.0231603	-0.928916	-0.358645	-1.25	1.44515	1.48461	0.41112	1.14386	-1.24111	1.09257	1.37944	-0.422952	0.744109	-1.26949	1.55397	1.45665	0.339814	1.54575	-1.42332
CHMP1A	no	no	no	no	yes	0.246924	0.48938	-2.41094	-0.196275	-1.24371	0.0875651	0.642237	-1.40247	-0.507898	-0.234223	0.117715	0.243851	-1.83287	0.666026	0.336489	-0.145291	-0.608745	1.92043	0.753184	-0.523753	-0.155957	1.0571	-0.937577	0.953287	0.0351075	0.568823	1.29791	1.64315	0.487477	-1.34695
TUBG1	no	no	no	yes	no	0.221533	-0.246754	-1.02804	-0.142536	-0.846855	-0.429524	0.0837031	-1.29918	-0.589836	-0.243819	-0.221355	-0.154472	-1.2542	0.0222537	-0.156864	1.27225	1.25083	0.339979	1.35579	-1.5015	0.796089	1.05475	-0.868429	0.989632	-1.10211	1.51583	1.67151	-0.262275	1.5994	-1.8258
PSMC3IP	no	no	no	yes	no	0.208891	0.0237533	-1.60388	-0.0592446	-0.828166	0.274891	-0.119859	-2.04414	-0.346793	-0.591636	0.347384	0.0763797	-1.01721	0.214995	-0.624597	1.17795	0.776753	0.56759	1.21008	-1.98191	1.23054	0.853956	-0.025287	0.659739	-1.25505	1.37263	1.03725	0.150283	1.6348	-1.3201
TOP2A	no	no	no	yes	yes	-0.915938	-0.521234	-0.377144	-0.336124	-0.612917	-0.369948	-1.24334	-1.14136	-0.690881	-0.649094	-0.698587	-0.642503	-0.514288	-0.860801	-1.11753	1.41099	1.62629	-0.811024	1.51096	0.450474	1.38238	1.71325	0.216454	1.16674	-0.816986	1.0848	1.19891	-1.10222	1.22404	0.436638
MYBBP1A	no	no	yes	no	no	0.0140364	-0.0108381	-1.6359	-0.644558	-1.38311	-0.464755	-0.0824765	-0.633554	0.709984	-1.02873	1.11503	1.17566	0.1027	1.09004	0.119623	0.444157	0.479543	-0.157359	0.656469	-2.94318	1.07534	0.767199	0.250243	1.06108	-0.961967	1.14603	0.602317	-0.00872155	0.696413	-1.55071
RPA1	no	no	no	yes	no	-0.680452	-0.672834	-1.10164	-0.68895	-0.85746	-0.464168	-0.500736	-1.39441	-1.25031	-1.03838	-0.520782	-0.609843	-0.849335	-0.460076	-0.669422	1.40449	1.59497	0.399579	1.39308	-0.78575	1.42112	1.24915	0.165233	1.10072	-0.386691	1.18359	1.29992	0.335525	1.74573	-0.361872
NIP7	no	no	yes	no	no	-0.0884368	0.100551	-0.614757	0.412642	-0.883635	0.731852	0.811962	-0.298086	-0.44905	-0.960467	0.262906	0.346879	-0.470905	-0.411314	-0.865975	1.26768	0.594248	-0.255834	0.753106	-1.65969	1.06427	1.33601	-1.97998	1.27262	-1.85891	1.14331	1.26065	-0.333453	1.23144	-1.45962
NASP	no	no	no	yes	yes	-0.323074	-0.140615	-1.30915	-0.471623	-1.0001	-0.38107	-0.270169	-0.601893	0.451172	-0.793499	0.485193	0.325815	-0.088308	0.463444	-0.422154	1.19839	1.03217	-0.262421	0.804542	-2.55356	1.3656	1.26738	-0.0721404	1.10444	-1.39719	1.50512	1.09536	-0.351682	1.0098	-1.66978
RFC3	no	no	no	yes	no	-0.454007	-0.540534	-0.300332	-0.653318	-0.535974	-0.22607	-0.898958	-1.22568	-0.476503	-0.870379	-0.329063	-0.39473	-0.489088	-0.696442	-0.928321	1.30119	1.51334	-0.197213	1.71237	-0.818992	1.83119	1.49159	-0.223024	1.43718	-1.41379	1.22421	1.34207	-0.612787	1.05722	-0.625158
WDR74	no	no	yes	no	no	0.313891	-0.297867	-1.02348	-0.560855	-1.07512	-0.0811537	-0.0156714	-0.490092	-0.618234	-0.573381	-0.416687	-0.00696081	-0.815306	0.0395247	-0.0363705	0.793187	0.81057	1.00455	1.0346	-2.43525	0.622639	0.562972	-1.08889	0.510424	-0.711096	1.5724	1.58548	1.07072	1.94561	-1.62016
MEIS2	no	no	no	no	yes	3.49534	-0.413407	-0.413407	-0.413407	-0.413407	-0.413407	-0.413407	2.22983	-0.413407	-0.413407	2.06168	-0.413407	-0.413407	-0.413407	-0.413407	-0.413407	-0.413407	-0.413407	-0.413407	-0.413407	-0.413407	-0.413407	-0.413407	-0.413407	1.13214	-0.413407	-0.413407	-0.413407	1.41619	-0.413407
NOTCH2	no	no	no	no	yes	0.154862	0.749709	-1.47556	0.629904	0.0233086	-0.562435	-0.00345247	-0.833754	0.402316	1.13179	1.50729	-0.12564	-1.294	0.517848	0.92963	1.72099	0.732169	-3.11591	0.0843115	0.104226	0.996166	-0.359742	0.786717	0.706745	-0.0215528	-0.317161	-0.403497	-1.23576	-0.634447	-0.795074
CDCA8	no	no	no	yes	no	-0.068821	-0.342944	-0.802143	-0.092797	-0.674372	-0.89205	-0.179153	-0.960847	-0.761313	-0.814075	-0.677193	-0.386064	-0.924394	-0.569129	-0.765173	1.76029	1.42807	-0.084024	1.20672	-0.868619	1.16286	1.36807	-0.599504	1.34396	-0.911112	1.49243	1.67565	-0.0633913	1.37637	-1.3773
TROAP	no	no	no	no	yes	0.343259	0.854131	-0.330245	0.106851	-0.212398	-0.613966	0.357343	-0.584319	-0.106301	-0.58153	-0.0600889	-0.0785778	-1.87656	-0.616467	-0.202439	1.71794	0.736901	-0.952227	0.853701	-1.12864	0.413124	1.1499	-1.71354	0.792052	-1.05446	1.80005	1.55236	-0.024336	1.22422	-1.76574
PAN2	no	no	no	yes	no	-1.10892	-0.801462	1.03171	-1.40749	1.10953	-1.13468	-1.91145	1.45344	-0.315971	0.399677	-1.33322	-1.64212	-0.138091	-0.793386	-0.799013	0.426107	-0.134719	-0.36828	0.932395	1.98474	-0.0475124	-0.160507	0.557385	-0.317985	1.38907	0.602353	0.662742	0.37823	1.06981	0.417625
ESPL1	no	no	no	yes	yes	-0.740771	-0.797404	-1.17551	-0.67941	-0.519466	-1.27771	-0.36892	-0.632767	-0.424156	-0.485406	-0.366201	-0.669226	-0.915644	-0.172989	-0.368727	1.57703	1.49926	-0.0855081	1.24743	-0.958093	1.40078	1.1349	0.124064	1.08649	-0.789359	1.51297	1.60114	0.489419	1.31277	-1.55898
TBRG4	no	no	yes	yes	no	0.238452	0.0811445	-1.31361	0.0343076	-1.22578	-0.162723	0.559771	-1.11502	-0.437572	-1.03134	0.257049	-0.00181459	-1.58757	-0.0817711	-0.411244	0.767807	0.872678	0.876923	1.26853	-1.383	0.419589	0.986729	-0.544456	0.795659	-1.48335	1.21396	1.66037	1.03622	1.4105	-1.70045
HUS1	no	no	no	yes	yes	0.321403	0.319617	-0.526111	0.407908	-1.05955	1.1203	0.525131	-0.554713	-0.134915	-1.70143	0.441346	0.645809	0.0203886	0.0544851	-0.881881	1.6626	0.677991	-0.311222	0.833308	-1.71542	0.790619	1.26836	-0.310683	0.498716	-2.20777	0.791202	1.05868	-0.942057	0.765899	-1.85801
IMP4	no	no	yes	no	no	0.181784	-0.313504	-1.34225	-0.199874	-1.18963	-0.173295	0.395544	-1.11674	-0.640663	-1.11577	-0.135676	-0.0980031	-1.00227	0.355896	-0.665295	1.06355	0.973215	1.1686	0.991226	-1.5726	0.926132	1.1372	-0.577886	0.91368	-1.28678	1.59011	1.25687	0.691732	1.38168	-1.597
ODF2	no	no	no	no	yes	0.0499078	-0.223338	-1.69638	-0.78244	-1.19881	-0.912404	-0.0385796	-1.05462	0.594142	-0.693296	1.05154	0.934525	0.0302051	1.33415	-0.0763976	0.835038	0.545412	-1.1494	0.609636	-2.68852	1.18567	0.54002	0.036072	1.17599	0.0972444	1.11618	1.03637	-0.657799	0.926088	-0.926199
SMC2	no	no	no	no	yes	-0.828122	-0.705284	-0.313281	-0.235135	-0.452124	-0.0534647	-0.710782	-1.0736	-0.780217	-0.780964	-0.698053	-0.439962	-0.498843	-0.761218	-0.886064	1.39582	1.87265	-1.21307	1.50232	-0.0124101	1.31951	1.71854	0.227819	1.28528	-1.21127	1.11378	1.17501	-1.18485	1.09206	0.135934
RABEPK	no	no	yes	no	no	-0.381895	-0.987138	-1.23863	-0.103156	0.0194585	0.723301	-0.630435	-1.21786	-0.318159	-0.805542	-0.63093	-0.892987	-1.70937	-0.424482	0.315364	1.16357	-0.60455	1.55298	-0.173549	0.238028	0.317395	0.903154	-1.546	-0.258203	0.0826898	1.13809	2.34107	1.03027	1.80653	0.290989
DSCC1	no	no	no	yes	no	-0.584314	-0.152613	-0.792913	-0.874157	-0.542534	-0.553514	-1.11549	-1.24967	-0.890559	-0.212094	-0.639302	-0.512978	-0.621699	-0.580736	-0.768538	1.24054	1.30399	-0.241797	1.3661	0.365006	2.07702	1.66852	-0.0640988	1.66494	-1.60319	1.38992	0.829245	-0.61747	0.443526	0.268851
HMGA1	no	no	no	yes	yes	0.38283	0.349426	-1.3708	-0.573688	-0.537586	-0.839521	0.603526	-1.35585	-0.778007	-0.194942	-0.568175	0.253582	-2.20497	-0.274964	-0.149906	-0.114914	0.688099	2.05386	1.23772	-0.746514	-0.374455	0.295979	-0.20763	0.580436	-0.0083881	0.576227	1.19846	1.96558	1.52287	-1.40828
TCF19	no	no	no	yes	no	-0.344293	-0.353798	-1.25429	-0.979768	-0.413314	0.0495727	-0.578266	-0.992437	-1.26792	-0.646393	-0.577289	-1.27004	-1.48505	-0.306271	-1.24136	0.298676	0.574285	0.249445	0.76957	-0.193809	1.22757	1.15639	0.162125	1.40878	-0.234507	1.61705	1.75626	1.80317	1.36322	-0.297314
NUMA1	no	no	no	no	yes	-0.536098	-0.571313	-0.744758	-1.22393	-0.969631	-1.19537	-0.662707	0.0760359	1.62618	-0.607982	1.57178	1.71672	2.27718	1.7118	0.0790599	-0.592051	0.0784392	-0.599042	-0.244074	-1.76563	0.706835	0.122977	1.08966	0.376795	0.0458653	0.031399	-0.535217	0.084588	-0.563038	-0.784453
NUSAP1	no	no	no	no	yes	-0.543637	-0.416335	-0.736322	-0.128432	-0.637721	-0.226227	-0.746928	-1.324	-0.831526	-0.533517	-0.911933	-0.664827	-0.744211	-0.659064	-0.706654	1.36209	1.50814	-0.27161	1.43556	-0.178971	1.40927	1.62342	-0.374159	1.19918	-1.25204	1.27044	1.44293	-0.867587	1.70682	-0.202134
KIF23	no	no	no	no	yes	-0.646934	0.428292	-0.29586	-0.11101	-0.667447	-0.32175	-0.773225	-0.88017	-0.273228	-0.555808	-0.192621	-0.494712	-0.80766	-0.37744	-1.03911	1.70545	1.65003	-1.15277	1.56743	-0.741907	1.5171	1.33452	-0.452711	1.03323	-1.4163	1.10727	1.56402	-0.811356	1.09456	-0.989885
KNL1	no	no	no	no	yes	-0.993788	-0.639631	-0.0962524	-0.0850803	-0.0606588	-0.424798	-1.19479	-0.871665	-0.494372	-0.439425	-0.736372	-0.813266	-0.270267	-0.715981	-0.872193	1.01502	1.58413	-1.46296	1.76491	0.57848	1.71889	1.52455	0.307842	1.69429	-0.864027	0.329207	0.488823	-1.55067	0.558482	1.02158
KIF11	no	no	no	no	yes	-0.887306	-0.529181	-0.445261	0.0509689	-0.407338	-0.588812	-0.87646	-1.19518	-0.49683	-0.860645	-0.846461	-0.868421	-0.715937	-0.343809	-1.29395	1.25597	1.63457	-0.787903	1.49871	0.15532	1.55516	1.78014	-0.0491826	1.53132	-1.13996	0.798695	1.26861	-0.704382	0.803285	0.704275
KIF20B	no	no	no	no	yes	-0.839846	-0.892566	-0.372911	-0.164036	-0.805518	0.16336	-0.967734	-1.12416	-0.499577	-0.519459	-0.47935	-0.402485	-0.215303	-0.455175	-1.08984	0.925205	1.45489	-1.2091	1.54554	0.411031	2.06409	1.56197	0.542529	1.90131	-1.38193	0.518681	0.337931	-1.20523	0.458779	0.738905
BARD1	no	no	no	yes	yes	-1.29367	-1.40134	0.575065	-0.0490101	0.633743	-0.0854098	-1.14449	-0.718706	-0.685425	0.781892	-1.12312	-1.14471	0.506954	-0.936238	-0.216721	-0.572084	0.131694	0.805598	0.700518	1.96029	-0.266165	0.471034	0.788801	0.529135	0.636632	-1.5981	-0.401585	-0.241111	0.532187	2.82435
CENPE	no	no	no	yes	yes	-0.895505	-0.54579	-0.608167	-0.0989507	-0.248323	0.0845564	-1.06004	-0.505297	0.202125	-0.807667	0.0883455	-0.0323187	0.311767	-0.281849	-1.18861	0.588546	1.36909	-1.67551	1.15003	-1.04427	1.82517	1.38465	0.594533	2.12966	-1.37239	0.263367	0.759739	-1.63429	0.289262	0.95813
EGF	no	no	no	no	yes	-1.02477	-0.244427	1.35732	0.0758407	1.00756	-0.197423	-0.613627	1.44711	-0.147242	1.1582	-0.37021	0.0995783	0.495482	-0.292583	0.847714	-0.998148	-1.61859	0.56434	-0.81832	1.43809	-1.14951	-1.14649	0.539199	-0.753173	1.69889	-1.27769	-1.05567	0.494114	-1.13555	1.62001
SLC7A1	no	no	no	no	yes	-1.41262	-1.17538	0.594183	-1.26674	0.413654	-1.4509	-1.35801	0.339582	-1.59905	0.736678	-1.24844	-1.35476	0.401482	-1.08635	0.68488	0.437523	0.0683794	0.821041	0.207362	1.55849	0.268389	-0.121667	1.42133	0.110672	1.72462	-0.108084	-0.0317545	1.13177	0.117959	1.17576
BRCA2	no	no	no	yes	yes	-1.00612	-0.525243	0.172913	-0.171235	0.03036	-0.0680344	-1.15004	-0.949149	-0.494295	0.170799	-0.418477	-0.701451	-0.20768	-1.29417	-0.502796	1.23341	1.47505	-1.03212	1.24186	0.43845	1.78364	1.58481	0.584785	1.65951	-2.09314	0.294008	0.705252	-1.32377	-0.137248	0.700118
DIAPH3	no	no	no	yes	no	-0.56146	-0.603877	-0.359245	-0.373097	-0.371073	-0.36946	-0.83613	-1.03056	-0.480774	-0.392549	-0.933131	-0.790859	-0.634235	-1.45963	-0.669757	1.34331	1.68311	-0.699272	1.62372	-0.184722	1.3458	1.78882	0.361216	1.61489	-1.2245	0.66331	0.952963	-0.994019	1.29848	0.292731
CUL4A	no	no	no	no	yes	-1.59467	-0.0861415	-0.591333	-0.980527	0.055562	-1.38138	-1.97374	-1.1852	-1.05515	-0.265932	-0.856124	-0.372267	-0.628024	-0.24467	-1.05274	1.21921	1.32526	0.374683	0.649096	-0.19546	1.82398	1.17939	0.829638	0.446232	-0.0758012	0.814453	1.29862	0.480453	1.3281	0.714467
TLE3	no	no	no	no	yes	0.142215	0.072268	0.0581908	-0.0262913	0.639487	-0.225895	-0.0338978	0.426913	0.153499	1.08456	-0.156727	-0.365949	-0.206718	0.306354	0.949624	-1.28124	-1.57314	0.26121	-0.78666	1.94523	-1.46694	-1.69084	0.665959	-0.683716	2.40415	-1.52414	-0.820975	1.10069	-0.46868	1.10145
PML	no	no	no	no	yes	1.29296	0.635971	-0.14592	0.199498	0.773404	-0.223013	0.745149	-0.520161	0.413713	0.593729	0.295457	0.655329	-0.461099	-0.241625	2.43533	-0.542864	0.280251	-0.168848	-0.586502	-2.27176	-1.83908	-0.696839	-0.651933	-0.485398	0.431316	1.92892	0.403175	-0.148151	-0.209854	-1.89115
SS18	no	no	no	no	yes	0.278847	1.01943	0.160712	0.957529	0.681959	1.034	0.459807	0.185739	-0.164691	1.8258	0.0396808	1.06048	0.208302	-1.00039	0.467316	-0.474287	-1.04157	-0.913955	0.446462	0.686421	-1.11176	-0.0997615	-1.32045	-0.160959	-0.163923	-0.697262	0.401812	-3.45912	-0.24427	0.938088
TP53	no	no	no	yes	no	-0.060954	-0.301077	-0.0540528	-0.0597331	0.292142	-1.48486	0.407555	-0.401282	-1.01137	1.59937	-0.744088	-0.506201	-0.592583	0.816567	1.91545	-1.21882	-0.919775	1.50258	0.765779	1.17475	-1.59868	-1.53426	-0.0773995	-0.651839	1.30194	-0.824317	0.215466	1.56352	0.64569	-0.159503
PLK4	no	no	yes	yes	yes	-1.10005	-0.805829	-0.372728	-0.0286351	-0.756734	-0.165877	-0.725118	-0.987708	-0.472745	-0.504926	-1.03009	-0.614649	-0.443871	-0.940132	-0.884309	1.11398	1.60021	-0.537287	1.7141	-0.258885	1.73339	1.67272	0.144264	1.0984	-1.11424	1.32757	1.27491	-0.794154	1.25541	-0.396978
MAP3K6	no	no	yes	no	no	0.954637	0.843915	-0.688219	0.406916	0.369387	-0.191866	0.448533	-0.119403	1.07205	0.00732789	0.86628	0.742974	-0.437913	1.43185	0.806962	0.241623	0.334786	-0.519116	0.121751	-2.43689	0.00645447	-0.20814	-1.118	-0.456292	-1.9473	1.59851	0.292114	-0.0712663	0.221692	-2.57336
KIF2C	no	no	no	yes	yes	-0.645978	-0.720915	-1.0519	-0.642047	-0.195304	-1.0218	-0.958228	-1.51656	-1.09749	-0.457151	-0.909215	-0.365026	-0.857669	-0.538306	-0.699671	1.40675	1.34482	0.379636	1.35677	0.0444055	1.07371	1.31445	-0.389942	1.37097	-0.237127	1.3158	1.59978	0.0248065	1.70805	-0.635621
MTF2	no	no	no	no	yes	-1.15253	-0.1735	-0.396672	-0.415113	0.413131	0.679261	0.103189	-0.945742	0.0937977	-0.0944614	-0.444878	-0.224191	-0.542989	-0.184311	-1.73318	0.987519	1.42943	-1.27479	1.45219	0.395625	1.27593	2.12943	-0.535474	0.811972	-2.34209	0.330499	0.678933	-1.08722	0.943286	-0.177049
UCK2	no	no	no	no	yes	-0.351672	0.0518275	-0.763357	-0.494238	-1.05291	-0.289343	-0.226205	-0.993428	-0.438114	-0.517146	-0.226453	0.100028	-0.507486	0.00147904	-0.0838347	1.36345	1.08345	0.290277	1.14576	-1.89434	1.15061	0.868266	-0.510558	1.13597	-1.35196	1.66721	1.46607	-0.186967	1.58413	-2.02053
ANP32E	no	no	no	yes	no	-0.219777	-1.02518	-1.92788	-1.79734	-1.44232	-0.46165	-1.39204	-0.518299	0.460862	-1.16415	0.718256	0.111465	1.24944	0.985746	-0.614563	0.890175	0.934707	0.093003	0.0190174	-1.75172	1.345	1.00486	0.707655	1.46806	0.395012	0.733976	-0.00700623	0.440043	0.537451	0.227211
LBR	no	no	no	yes	yes	-0.884181	-0.640664	-0.703051	-0.341467	-0.653175	-0.437516	-1.13776	-0.557171	-1.25533	-0.778622	-1.01	-0.81354	-0.809381	-0.968337	-0.502212	1.54137	1.49903	-0.488639	1.48764	0.801887	1.78941	1.56103	0.0807594	1.47201	-0.7074	0.611449	0.842622	-0.542291	1.34854	0.194995
MEIS1	no	no	no	no	yes	0.42551	-0.278556	-1.14428	-0.331781	1.47642	-0.0540022	1.02548	0.0557164	0.264992	0.0824026	0.442002	-0.485676	-1.57885	-0.592237	-0.284879	0.932962	0.267345	-2.28848	0.989636	0.530178	1.59731	1.06585	-1.02768	0.514969	-0.931881	0.701818	1.48925	-0.943274	0.0122235	-1.93249
CNOT9	no	no	no	yes	no	-0.416729	-0.531009	-1.0575	0.00647067	-0.609293	-0.400413	-0.5175	-1.35172	-1.23296	-0.610849	-0.539961	-0.459416	-0.803276	-0.236522	0.0870356	1.60185	0.940659	0.409171	0.805976	-0.270896	1.66482	1.65845	-0.62767	1.29778	-1.42441	1.43632	1.31989	-0.370523	1.48633	-1.25411
LYAR	no	no	no	yes	no	-0.189443	0.0265795	-0.526262	-0.0359075	-0.851595	0.41558	-0.404795	-0.716857	0.111044	-0.672531	0.30234	0.0127083	-0.0881043	0.16448	-0.682637	1.44981	0.690244	-0.632278	1.09854	-2.14207	1.39169	1.10935	-0.633274	0.827726	-2.01397	1.51459	1.31614	-0.657601	1.40724	-1.59073
PRIM2	no	no	no	yes	yes	0.0161417	-0.311527	-0.501036	-0.301718	-0.94038	0.249717	-0.233689	-0.628032	-0.808856	-0.976566	0.0476659	-0.337875	-0.0356617	-0.926958	-1.47532	1.11703	1.85183	-0.0537138	1.19117	-0.426309	1.69196	1.51119	-0.159172	1.41258	-1.91075	0.924866	1.01515	-1.31424	1.06258	-0.750084
MMS22L	no	no	no	yes	no	-0.344859	-0.215457	-0.247581	-0.152216	-0.0431634	0.604643	-0.280601	-0.939833	0.00621802	-0.252866	0.365557	-0.166877	-0.372569	-0.377567	-1.02573	1.52863	1.4914	-1.3873	1.05681	-0.671692	1.91943	1.54757	0.415263	1.12499	-2.39249	0.609464	0.496238	-1.90034	0.162909	-0.557978
PRPS1	no	no	no	yes	no	-0.720631	-0.376224	-0.508519	-0.459311	-1.29645	-0.274534	-0.746793	-0.700735	-0.880662	-0.686946	-0.567058	-0.218047	-0.423697	-0.736887	-0.450085	1.45265	1.59709	0.219072	1.26843	-0.96581	1.27539	1.81421	-0.154687	1.10823	-1.37959	1.41401	1.33607	-0.399696	1.48528	-1.02409
GINS4	no	no	no	yes	no	-0.0209056	0.138391	-0.718567	-0.234535	-0.470191	-0.187285	-0.0229087	-1.11498	-0.657119	-0.625192	0.180576	0.218979	-0.803311	-0.0595005	-0.336121	1.56561	1.50336	-0.521434	1.62643	-1.2461	1.39705	0.993566	-0.833654	1.36375	-1.66888	1.14817	1.0093	-0.607958	1.00185	-2.01838
CDKN2A	no	no	no	yes	no	-0.258285	0.0452874	-0.402163	-0.108474	-0.411402	0.00922496	-0.644464	-0.0595827	-0.653281	-2.12982	-1.31173	0.0054125	-0.655561	0.0896927	-0.445759	0.381847	-0.259737	2.83505	0.425164	-0.350095	-0.236774	-0.10924	-1.20043	0.348028	-0.378008	0.9526	0.960909	2.092	2.00663	-0.537044
MKI67	no	no	no	yes	yes	0.135749	0.0914712	-1.4285	-0.0621493	-0.967462	-0.241313	-0.134521	-0.923072	0.285855	-0.488944	0.351828	0.298093	-0.899832	0.560166	-0.598455	1.50979	1.12121	-1.23242	0.808873	-2.20535	1.41522	0.939941	-0.0725696	0.784978	-0.956758	1.43466	1.49649	-0.28936	0.937473	-1.67109
PPRC1	no	no	yes	no	no	0.409355	0.403419	-0.766747	0.296625	-0.823105	-0.149355	0.498694	-0.392684	0.484349	-0.180651	0.550998	0.475148	-0.397017	0.577222	-0.21704	1.28509	0.99971	-0.861366	0.686405	-2.51917	0.945236	0.625458	-0.628879	0.591861	-1.5528	1.37825	0.863479	-0.547208	0.698305	-2.73359
SSRP1	no	no	no	yes	no	-0.163007	-0.418919	-1.29172	-0.45402	-0.757687	-0.566443	-0.370948	-0.960735	-0.741133	-0.458144	-0.181654	-0.206694	-0.721627	0.144916	-0.203969	1.40507	1.11384	0.0875721	1.17784	-1.95796	1.27052	1.06116	-0.394745	0.895066	-0.965875	1.73103	1.56052	0.348763	1.57833	-1.55932
INCENP	no	no	no	no	yes	-0.642159	-0.731402	-1.03924	-1.24378	-1.23297	-1.32366	-0.533474	-0.783226	1.06414	-1.22661	1.35994	1.26772	1.27998	1.5171	-0.279346	0.45064	0.920647	-0.751914	0.560491	-1.56956	1.46976	0.764584	0.343787	0.971505	-0.487616	0.853163	0.337675	-0.287369	0.276764	-1.30556
CHEK1	no	no	no	yes	yes	-0.359093	-0.512936	-0.738856	-0.290817	-0.592263	-0.284076	-0.389265	-1.0837	-0.630061	-0.822891	-0.434885	-0.523276	-0.401791	-0.252984	-0.966187	1.36596	1.48571	-0.124908	1.45564	-0.868632	1.61576	1.70504	0.0724972	1.4761	-1.93073	1.12602	1.13653	-0.447506	1.19154	-0.975941
SPC25	no	no	no	yes	no	-0.236318	-0.933987	-0.297249	0.148804	-0.625691	-0.0579858	-0.271658	-0.989442	-0.188902	-0.922547	-1.28837	-0.257683	-0.184457	-0.207052	-1.69109	1.10228	1.13334	0.0313381	1.32403	-0.526336	1.22873	1.6085	-0.744257	2.0581	-1.55273	0.994859	1.4361	-1.08738	0.948014	0.0490383
NUP205	no	no	no	yes	no	-0.407507	0.08452	-0.0136951	-0.270541	-0.673578	0.0148379	-0.449506	-0.875055	-0.674544	-0.306959	-0.194824	-0.25025	-0.303214	-0.212177	-0.662309	1.77308	1.47855	-0.936206	1.17587	-0.938514	1.61224	1.41011	-0.266105	0.966238	-2.05422	1.18559	1.2549	-1.1041	1.15272	-1.51534
DCK	no	no	no	yes	no	-1.08971	-0.814773	-0.127919	-0.237727	-0.711779	0.370155	-1.04007	-1.03612	-0.606288	-0.807852	-1.14398	-0.621164	0.210096	-0.608938	-0.807326	1.05152	1.43632	0.0872791	1.37403	1.03032	2.03836	1.15728	0.40221	1.7193	-1.40268	0.393983	0.482082	-1.64605	0.126644	0.822798
SUPV3L1	no	no	yes	no	no	-0.271365	0.0173361	-0.683425	-0.756612	-0.830678	0.00772391	-0.849938	-1.05389	-0.489809	-1.07318	-1.04525	-0.143951	-0.814001	-0.355109	-1.46429	1.90822	1.6802	-0.263448	1.22959	-0.600485	1.29888	1.73214	-0.29165	1.25431	-1.06164	1.2154	0.883415	-0.160847	1.29135	-0.309012
ATAD2	no	no	no	yes	no	-0.33456	-0.268203	-0.547055	-0.281188	-0.863255	0.0205446	-0.53138	-1.08258	-0.407492	-0.795159	-0.255601	-0.0423424	-0.410411	-0.426392	-0.802121	1.74927	1.65539	-0.535272	1.22296	-1.36766	1.50903	1.50009	-0.200934	1.02637	-1.77207	1.50285	1.18916	-0.623454	1.10757	-0.936109
BUB1B	no	no	no	yes	no	-0.467539	-0.190763	-0.835299	-0.208535	-0.734078	-0.50808	-0.743724	-1.43484	-0.531854	-0.706278	-0.245061	0.0227011	-0.341915	-0.0359301	-0.729263	1.51654	1.46274	-0.903375	1.43913	-0.871433	1.41363	1.58079	-0.199117	1.07654	-1.34605	1.46696	1.22527	-0.817268	1.54348	-0.897386
CCNB2	no	no	no	yes	yes	-0.290968	-0.472179	-1.09322	-0.208924	-0.548627	-0.487323	-0.706075	-1.23472	-0.875475	-0.971484	-0.79227	-0.52963	-0.820192	-0.588526	-0.861804	1.52091	1.39518	-0.269972	1.58214	0.285635	1.34957	1.61919	-0.926328	1.33361	-0.628565	1.21377	1.49252	-0.502618	1.4164	-0.400028
DUSP2	no	no	yes	no	no	1.23395	0.668845	-0.260231	0.732439	-0.147749	0.651537	1.31607	0.0208334	0.188498	-0.550105	0.779997	0.481943	-0.147406	0.510019	0.0725895	0.482266	0.132403	0.456361	0.249454	-2.74948	0.431715	0.301522	-1.38069	-0.339653	-1.739	0.902575	0.478137	-0.269412	0.346022	-2.85345
FANCC	no	no	no	no	yes	0.236742	0.236368	-0.458243	0.0407558	-0.43891	0.0365628	0.473507	-1.22768	-0.310225	-0.541736	0.0316843	-0.449571	-1.34985	-0.393884	-0.6443	1.54296	1.1171	-0.589602	1.60189	-1.33434	1.25689	1.29497	-0.77176	1.17395	-2.21384	1.16054	1.06315	-0.177831	0.986987	-1.35226
DONSON	no	no	no	yes	no	0.163749	0.121636	-1.40803	0.438813	0.000718983	-0.068782	-0.0548947	0.208939	0.0108832	-0.485375	-0.103479	-0.16477	-1.33604	-0.830596	-0.68871	0.810546	1.2709	-0.198595	0.860837	-0.878203	1.95556	1.4597	-0.573926	1.29115	-1.70907	0.579753	1.30551	-1.56629	1.24908	-1.66101
HK2	no	no	yes	no	no	-0.80989	-0.407607	-1.42728	-0.757396	-1.14097	-0.91106	-0.519422	-0.603313	0.0366904	-0.750933	0.321631	0.217512	0.232472	0.355565	-0.401297	1.48389	1.33006	-0.356685	0.676709	-2.38476	1.59255	1.41247	0.8037	1.14603	-0.805933	1.31849	0.875808	-0.0845806	0.71425	-1.15669
RACGAP1	no	no	no	yes	yes	-0.763692	-0.505015	-0.927093	-0.568342	-0.593761	-0.645109	-0.624776	-1.09071	-0.908222	-0.588922	-0.270009	-0.350475	-0.861407	-0.330951	-0.983667	1.54301	1.35641	-0.141494	1.4844	-0.594853	1.49158	1.51819	-0.33685	1.40595	-0.997142	1.25542	1.36211	-0.523883	1.73891	-0.549591
SPC24	no	no	no	yes	no	-0.0583174	-0.45953	-0.937441	-0.407298	-0.975555	-0.864542	-0.129026	-0.719709	-0.833436	-0.806922	-0.635889	-0.484502	-1.24297	-0.613718	-0.707818	1.21957	1.20623	0.858893	1.32483	-0.818606	1.27392	1.5103	-0.500705	1.3009	-0.986359	1.30121	1.38884	0.405572	1.66419	-1.27212
WDR90	no	no	no	yes	no	0.105273	0.420008	-0.456939	0.186186	-0.336014	0.190756	0.0815555	0.333788	0.82167	-0.991042	1.92164	0.320604	-0.558779	0.366242	-0.0390447	0.418976	-0.0452887	-1.14163	0.793259	-2.76321	0.651185	-0.409844	-0.208799	0.365356	-1.19055	1.58502	0.657361	0.483306	0.961965	-2.52302
CCNF	no	no	no	no	yes	0.0127319	-0.0419359	-1.39332	-0.189925	-1.0546	-0.742691	-0.31916	-1.21004	-0.387991	-0.980583	0.0509866	0.00826086	-0.966804	0.0447921	-0.32377	1.51274	1.47887	0.0663211	1.29185	-1.58948	1.15127	1.02585	-0.579044	1.2682	-0.9881	1.44912	1.27549	0.00608593	1.46367	-1.33879
TFB2M	no	no	yes	no	no	-1.01044	-0.236394	-0.463784	0.0690544	-0.822402	0.214816	-0.896875	-1.31497	-1.39955	-0.827595	-0.956089	-0.266364	-0.495165	-0.653334	-1.38079	1.23335	1.74145	-0.0113435	1.37719	0.00415477	1.47108	1.56266	-0.378216	1.18464	-0.79937	1.12116	1.39532	-0.267751	1.2388	-0.433236
SMC6	no	no	no	yes	no	-1.79557	-2.1756	0.792708	-0.152152	0.805144	0.328011	-1.16956	-0.15746	0.115179	0.0374954	-0.39047	-0.710291	0.912943	-0.726268	-0.924967	0.0721145	0.77529	-1.60555	1.16865	0.872099	1.21152	1.04802	1.04291	1.12061	-0.808092	-0.35698	0.403512	-1.47596	0.374188	1.36851
KIF15	no	no	no	no	yes	-0.37121	-0.346664	-0.428558	-0.156723	-0.56407	-0.188482	-1.00249	-0.874461	-0.718171	-0.305895	-0.401449	-0.516521	-0.62871	-0.958084	-1.31219	1.52269	1.62232	-0.833099	1.39207	-0.801956	1.41569	1.54811	0.303103	0.747557	-1.4821	1.65254	1.49473	-0.541212	1.18438	-0.451158
WDR43	no	no	yes	no	no	-0.470348	-0.13244	-0.485107	-0.224693	-0.836954	0.00115892	-0.17428	-1.02252	-0.219623	-0.608329	0.0867273	0.232097	0.140648	-0.166644	-0.843091	1.32762	1.62785	-0.451361	1.04674	-1.64037	1.26135	1.42455	-0.0797873	0.76387	-1.95255	1.37201	1.39702	-1.52683	1.27218	-1.11889
SLBP	no	no	no	yes	no	-0.2114	-0.0927539	-0.508428	-0.127368	-1.04718	-0.314018	-0.299364	-1.1313	-0.673425	-1.13238	-0.438943	-0.299773	-0.831413	-0.165132	-0.887153	1.32103	1.47253	0.308902	1.31273	-1.19654	1.31404	1.34146	-0.563187	1.43651	-1.61202	1.22898	1.37382	-0.0130122	1.52538	-1.09058
CDC25A	no	no	no	yes	yes	0.0641243	0.0469787	-1.21288	-0.227825	-0.669358	-0.0636762	-0.00467628	-1.28101	-0.223203	-0.756206	0.130725	0.0967571	-1.22037	0.292713	-0.636867	1.38251	1.10687	0.115297	1.09892	-1.6756	1.41094	1.08533	-0.274095	1.23771	-1.68256	1.30298	1.26275	-0.157181	1.22701	-1.7761
HMGB2	no	no	no	yes	no	-0.483476	-0.746046	0.0523743	-0.775311	-0.500919	-0.696718	-0.967352	-0.328293	-1.36913	-0.700239	-0.90204	-0.725083	-0.458658	-0.847799	-0.678863	1.34898	1.50075	0.228157	1.50202	-0.460276	0.948449	1.32905	-1.33902	0.620936	-0.346078	1.47632	1.60202	0.386579	1.96791	-0.638249
SAP30	no	no	no	no	yes	-0.200466	-0.813167	-0.0203709	1.03731	-0.0919896	-0.161648	-1.11523	0.226165	-1.08048	-1.02036	-0.265047	-1.47748	-0.211918	-0.127927	-0.266622	1.12617	1.0206	0.196157	1.37026	0.0237636	2.08	1.44288	-1.57279	1.44963	-1.66681	0.508833	0.402068	-0.515476	0.99907	-1.27513
PTTG1	no	no	no	yes	yes	-0.373159	-0.633587	-0.865424	-0.678843	-0.823343	-0.430527	-0.779728	-1.23979	-1.01906	-1.13754	-0.938613	-0.774622	-0.771145	-0.771502	-0.948214	1.36225	1.36805	0.212084	1.49163	0.0899156	0.933551	1.44837	-0.820679	1.0737	0.206273	1.41751	1.51647	-0.0735131	1.77378	0.185679
RAD21	no	no	no	yes	yes	-0.935972	-0.742919	-0.224574	-0.388143	-0.631416	-0.721753	-1.20579	-0.643542	-1.09777	-0.548783	-0.922493	-0.546993	-0.209812	-0.836946	-0.958593	1.47585	1.83379	-0.765616	1.68952	-0.00289489	1.68248	1.54646	0.23401	1.16397	-0.753905	0.875641	1.05081	-0.959712	0.991526	0.553563
ORC5	no	no	no	no	yes	-0.150579	-0.0207695	-0.386038	-0.135574	-1.18871	0.455447	-0.314587	-1.22293	-1.03835	-1.35758	-0.135896	0.120323	-0.373213	-0.27912	-1.47755	1.24988	1.80507	-0.667586	1.01663	-0.243828	2.1199	1.57853	-0.0878186	1.21419	-1.87522	1.15579	0.492697	-0.254889	0.356636	-0.354857
PSIP1	no	no	no	yes	no	-0.70948	-0.482319	-0.45033	-0.206391	-1.31379	-0.185829	-0.742833	-0.994446	-1.26877	-0.706564	-1.47691	-0.354644	-0.232175	-1.39514	-0.890022	0.781867	1.79971	-0.167357	1.51915	0.19235	1.52905	1.62148	0.616419	1.1799	-0.825033	0.492938	1.10233	-0.257259	1.49419	0.329893
MELK	no	no	no	yes	no	-0.654941	-0.45089	-0.315588	-0.325761	-0.894334	-0.405143	-0.508981	-1.09015	-0.523802	-0.500598	-0.518499	-0.414006	-0.624132	-0.686686	-0.653132	1.6204	1.41797	-0.0726115	1.51924	-0.955443	1.47494	1.63524	-0.110682	1.36803	-1.40412	1.36235	1.1565	-0.858876	1.41383	-1.00014
WRN	no	no	no	no	yes	-1.22852	-0.890142	1.34296	0.343489	0.674126	0.424448	-0.602238	0.401022	0.397921	0.840659	-0.287645	-0.00935248	-0.189044	-1.2792	0.276	0.676677	-0.257893	-2.07611	1.40194	0.555079	0.44613	0.857226	1.27419	0.666587	-0.940934	-0.185912	-0.178942	-2.71168	-0.982619	1.24177
CUL5	no	no	no	no	yes	-0.905109	-0.290428	0.827716	0.118832	0.294469	0.403923	-1.28191	-0.468089	-0.318894	-0.213539	-0.857379	-0.76901	0.506014	-1.78938	-0.698253	0.24919	1.24513	-1.73601	0.927641	1.54454	1.42325	1.12695	0.890352	0.69452	-0.901983	-0.482848	-0.246838	-1.29938	-0.139898	2.1464
WEE1	no	no	no	yes	no	-0.490185	-0.635923	-0.473801	-0.154513	-0.203354	-0.523743	-1.08401	-1.08424	-0.654464	-0.774375	-0.989849	-0.730335	-1.06707	-1.10789	-0.629363	1.21739	1.72162	-0.498926	1.68251	0.289026	1.77922	1.59343	0.402388	1.8536	-1.18078	0.709714	0.495979	-0.397773	0.960656	-0.0249216
PLK1	no	no	yes	yes	yes	-0.246753	-0.585783	-1.32901	-0.263469	-0.670769	-0.697505	-0.170205	-1.30361	-0.633846	-0.655559	-0.263229	-0.388387	-1.57685	-0.0842904	-0.640695	1.41101	1.29534	-0.248536	1.52546	-0.624348	1.08268	1.14035	-0.783035	1.22246	-0.270557	1.70353	1.56571	-0.172848	1.64208	-0.979353
SMAD3	no	no	no	no	yes	0.722934	-0.354519	-0.57056	0.605089	0.303773	0.314374	0.297322	0.188968	-0.57336	0.1299	0.421368	-0.0905451	0.403667	0.231699	0.864079	-1.40531	-1.15176	0.0102933	0.0208407	1.32947	-1.48296	-1.55666	0.840553	-1.08614	1.88558	-1.29139	-1.1652	1.84312	-1.29912	1.61449
NUDT21	no	no	no	yes	no	-1.12297	-0.742747	-0.335452	-0.701962	-0.454755	0.0712908	-1.10281	-1.37445	-0.906842	-0.718876	-0.718964	-0.668671	-0.0925952	-1.12203	-1.04273	0.823495	1.47332	0.134992	1.41676	0.575409	1.8988	1.65471	0.380272	1.4568	-0.876229	0.520272	0.736152	-1.09095	0.685537	1.24523
CHAF1A	no	no	no	no	yes	-0.26361	-0.161801	-1.5154	-0.919849	-1.19493	-0.813816	-0.371462	-0.783591	0.798964	-0.807192	1.07615	1.00287	0.411545	1.0309	-0.189049	0.572204	0.784272	-0.219462	0.637075	-2.74872	1.31205	0.955497	0.543419	1.14787	-0.856832	0.986519	0.786077	-0.161328	0.507505	-1.54588
TK1	no	no	no	yes	no	-0.423316	-0.43637	-1.09887	-0.712902	-0.729117	-0.609741	-0.519011	-1.20183	-1.19893	-1.03144	-0.742425	-0.637214	-1.48615	-0.485835	-0.478009	0.935556	1.11779	1.34985	1.38921	-0.331362	0.876765	1.04656	-0.450999	1.13269	-0.171406	1.41662	1.49468	1.03612	1.70634	-0.757265
PBK	no	no	no	no	yes	-1.02684	-0.770666	-0.358239	-0.614617	-0.458701	-0.371834	-1.14904	-0.992719	-1.2588	-0.849523	-0.939585	-0.99848	-0.608138	-0.971404	-1.08614	0.861418	1.50392	0.496074	1.58941	0.64381	1.36597	1.59341	0.152692	1.3822	-0.39132	0.79584	0.984163	-0.77293	1.34726	0.902811
DTYMK	no	no	no	no	yes	-0.286752	-0.540753	-1.12774	-0.508725	-0.671272	-0.427223	-0.152902	-1.04051	-1.1022	-1.26613	-0.867418	-0.306017	-1.23968	-0.688662	-0.776777	1.38861	1.37548	0.860614	0.958086	-0.434725	0.799236	1.35566	-0.823213	1.12491	-0.550914	1.42678	1.64044	1.08317	1.51001	-0.711392
ATF5	no	no	no	no	yes	0.405348	0.14254	-1.57051	-0.602669	-0.953137	0.0568669	0.285743	-0.949529	-0.720411	0.734228	0.503975	0.380827	-0.935696	0.87616	-0.0312417	-0.954272	-1.36348	1.6755	0.37061	1.43159	-1.26697	-0.900472	-0.213293	-0.319944	2.69625	-0.515889	0.419481	1.57312	-0.597839	0.343103
BUB1	no	no	no	no	yes	-0.477199	-0.610447	-0.364202	-0.633572	-1.20298	-0.0340864	-1.16234	-1.21937	-0.791561	-0.558767	-0.291618	-0.893027	-0.516418	-0.880502	-0.367752	1.57344	1.35863	-0.658641	1.43179	0.51935	1.45243	1.54882	-0.855937	1.29365	-0.521717	0.956664	1.28012	-1.17202	1.52164	0.275626
CDK1	no	no	no	yes	yes	-0.837354	-0.595774	-0.435533	-0.356743	-0.670545	-0.309833	-0.872152	-1.27819	-0.920912	-0.839809	-0.719215	-0.681312	-0.675316	-0.789766	-1.14613	1.24468	1.57413	0.168884	1.58923	-0.0988583	1.56216	1.53022	-0.039513	1.39739	-1.16877	1.25879	1.13659	-0.581627	1.34392	0.211365
KIF5B	no	no	no	no	yes	-0.889926	-0.490313	0.280682	0.144683	1.04877	-0.0944981	-1.20128	-0.160865	-0.146921	0.640231	-0.551514	-0.449442	0.549987	-0.5542	0.172584	-0.579064	-0.14528	-1.44567	-0.316346	2.37713	0.00582533	-0.0199952	0.901646	-0.262486	1.16297	-1.11474	-0.618935	-0.720544	-0.769628	3.24712
PPM1D	no	no	no	yes	no	-0.087287	0.547455	-0.757484	-0.304396	-0.0858863	1.01635	0.394025	-0.417595	-0.293616	-0.435158	0.312039	-0.0580785	-1.43894	-0.11552	-0.58559	1.1062	1.97032	-0.94637	0.426387	-1.14015	1.30513	0.399867	-0.928136	0.639996	-1.75848	1.55546	0.746061	-0.0788959	1.3328	-2.3205
RRM2	no	no	no	yes	no	-0.328631	-0.199557	-0.867678	-0.162422	-0.766561	-0.384103	-0.526104	-1.16869	-0.599325	-0.878483	-0.237382	-0.379218	-0.871342	-0.292867	-0.967373	1.43009	1.55177	0.113395	1.28325	-0.952341	1.6302	1.4151	0.0525661	1.45662	-1.72509	1.24027	1.26999	-0.261343	1.19748	-1.07222
POP7	no	no	no	yes	no	0.17721	0.142859	-0.951139	0.0330546	-0.871087	-0.386067	0.644183	-0.695775	-1.16748	-1.31689	-0.730871	0.173333	-1.49884	0.137495	-0.165686	0.321693	1.22746	1.30815	0.47376	-0.904277	0.0201594	0.551298	-1.14159	0.659707	-0.158474	1.37996	1.80116	1.63828	1.34792	-2.0495
CKS1B	no	no	no	yes	yes	-0.850914	-0.743849	-0.445549	-0.836505	-0.536953	-1.08629	-0.593636	-0.806742	-1.05535	-0.739667	-1.02078	-1.50636	-0.994039	-0.770994	-0.616092	0.915142	1.4748	1.02282	1.21095	0.175594	0.938906	1.55038	-0.587233	1.07928	-0.168101	1.18878	1.69115	0.188037	1.62559	0.297623
SLC19A1	no	no	yes	no	no	0.314321	0.454765	-1.77628	0.207223	-0.93709	-0.145728	1.09052	-1.55818	0.779961	-0.408862	0.811366	0.579669	-1.46326	0.757883	-0.337681	0.281477	0.791586	0.571025	0.514534	-2.06531	0.139623	0.638578	-0.189062	0.728628	-1.28559	0.912177	0.951058	0.488508	1.28566	-2.13152
EXO1	no	no	no	no	yes	-0.505431	-0.589812	-0.870821	0.00147075	-0.510569	-0.339642	-0.477716	-1.35349	-0.324587	-1.10898	-0.16948	-0.0943394	-0.744912	-0.383083	-1.22506	1.41955	1.20424	0.0132937	1.45654	-1.01388	1.63403	1.64001	0.221756	0.916683	-1.36445	1.19323	1.40669	-0.425653	1.46991	-1.0755
SLC29A2	no	no	yes	no	no	0.0748139	0.269042	-1.23158	0.132833	-1.11032	-0.260261	0.820018	-0.747541	0.221685	-1.03768	0.530373	-0.0609153	-0.933904	0.182579	-0.12971	0.914579	1.21045	-0.0983537	0.577882	-1.70921	0.566904	1.01116	0.32531	0.541789	-1.98475	1.32245	1.99474	0.211818	0.649457	-2.25364
UBE2C	no	no	no	no	yes	0.190593	0.126511	-0.978321	-0.29266	-0.72154	-0.017775	-0.355079	-0.562935	-0.781365	-0.975991	-0.26103	-0.22211	-1.18172	0.203475	-0.479611	1.26685	1.20389	-0.156948	1.2583	-0.943369	0.786154	1.30676	-1.80024	0.627315	-0.918982	1.71325	1.60442	-0.425678	2.01178	-1.22393
SHMT1	no	no	no	yes	no	-0.463335	-0.118354	-1.59977	-0.113107	-0.87978	-0.922835	-0.023674	-1.02953	-0.23565	-1.31535	-0.619137	-0.0767933	-1.09959	0.335485	0.36754	0.640737	0.823103	0.703812	1.29231	-1.39197	0.885401	0.951708	-0.407041	0.93497	-1.04176	1.48449	1.74499	0.590568	1.88948	-1.30692
POLE	no	no	no	yes	yes	0.0258869	0.815428	-1.37826	-0.470422	-0.1009	-0.617457	-0.496461	0.166198	0.310653	-0.769189	1.20966	-0.00636329	-0.415016	0.544811	0.269708	0.430882	0.424806	-0.604903	0.736723	-2.99608	1.1331	0.654855	0.0410754	0.869921	-0.591151	1.30829	0.814775	-0.165556	1.26112	-2.40614
PUS1	no	no	yes	no	no	-0.120419	0.154724	-0.990952	-0.682517	-1.55476	-0.55364	0.46032	-0.414035	1.13926	-1.10166	1.33095	1.23308	0.90123	1.35001	-0.582449	0.473838	0.400916	-0.214701	0.352477	-2.18695	1.0825	0.687424	-0.243316	0.858214	-1.34279	0.975519	0.394726	-0.544403	0.75557	-2.01816
AURKB	no	no	no	yes	yes	0.178123	-0.098551	-0.855938	-0.0947063	-0.799698	-0.358215	-0.00918212	-0.966667	-0.639407	-0.810989	-0.151225	-0.185864	-1.00715	-0.209615	-0.747701	1.63803	0.992267	0.125427	1.11023	-1.4127	1.14838	0.956423	-0.312923	1.11824	-1.34315	1.6918	1.44176	-0.0081797	1.60268	-1.99149
FARSA	no	no	yes	no	no	0.360736	0.113839	-1.67858	-0.137069	-1.36479	-0.173737	0.407172	-1.61677	-0.100565	-0.897606	0.369588	0.793827	-0.849259	0.583162	-0.18444	0.501234	0.723411	1.19066	0.561105	-2.42318	0.576853	0.698883	-0.215592	0.953001	-0.716589	1.35595	1.23804	0.447012	1.20768	-1.72398
DCTPP1	no	no	yes	yes	no	0.258128	0.2219	-1.40478	-0.140476	-0.585233	-0.163357	0.795648	-1.36441	-0.866879	-0.888141	-0.507202	0.140682	-1.51791	0.0944557	-0.211668	0.822813	1.01002	1.48439	0.938095	-1.31649	0.25366	1.08921	-0.980377	0.71195	-0.791372	1.43463	1.33774	0.658402	1.41366	-1.92708
HOXC10	no	no	no	no	yes	-1.48248	-1.48248	0.243538	1.17754	-1.48248	0.690608	0.368475	0.947795	1.22879	0.458446	0.374834	1.47924	1.10961	0.342094	-0.278591	-1.48248	-1.48248	-0.440005	0.81386	-0.469897	-1.48248	1.14334	0.7478	0.517839	1.08898	-0.630623	-1.48248	0.154475	-0.597204	-0.0935742
GINS3	no	no	no	yes	no	-0.224605	-0.301948	-0.588855	-0.239057	-1.05629	-0.760529	0.00686868	-1.16929	-0.484481	-0.878056	0.00230942	0.261147	-0.931931	-0.123092	-0.862028	1.31029	1.23553	-0.114383	1.54134	-1.23885	1.52243	1.32821	-0.609769	1.0094	-1.55032	1.53134	1.14376	0.197433	1.42816	-1.38473
EWSR1	no	no	no	no	yes	0.617587	1.04875	-0.563609	0.697633	-0.49003	0.367552	0.9258	0.135252	1.02346	0.0161198	1.22072	1.07145	0.139769	1.46957	0.800292	0.114534	-0.349048	-0.913075	-0.0734237	-3.06856	0.310561	-0.220322	-1.25181	0.148592	-1.04787	0.60114	0.208942	-1.03681	0.154069	-2.05724
NAA38	no	no	no	yes	no	0.904519	0.096282	-0.123593	-0.440029	-0.185336	0.457852	0.477874	0.347603	-0.702498	-1.00715	-0.516167	-0.0846247	-1.70255	-0.134672	-0.16615	-0.202129	0.587092	2.92877	-0.613332	-0.342927	-1.07872	0.22431	-2.0474	-0.778752	0.798069	0.639801	0.768914	1.45195	1.51216	-1.06916
TRAIP	no	no	no	no	yes	0.970824	0.325945	-0.256083	0.792439	-0.286706	-0.966243	-0.134211	0.0470906	-0.41207	-1.81367	-0.198581	-0.0146576	-1.32115	-0.0285485	-0.75078	0.0456139	0.796818	-0.29022	1.57273	-1.04471	1.07711	0.698283	-0.563247	1.33869	-1.40122	1.59685	1.16424	-0.578557	1.56332	-1.9293
CHEK2	no	no	no	yes	no	-0.399817	-0.946282	-0.675106	-0.451596	-0.319227	-0.609011	-0.661165	-1.09021	-0.831928	-0.610316	-0.553691	-0.403802	-1.26521	-0.424294	-0.00472687	1.29788	1.14874	0.668802	1.66692	-0.814883	1.41497	1.24639	-0.769163	1.32334	-1.52432	1.13611	1.57378	0.269129	1.47273	-0.864032
KMT5A	no	no	no	no	yes	-0.275276	-0.296921	-0.204397	-0.724878	-0.305311	-0.889599	-0.616232	-0.823102	-2.10596	0.190127	-1.31512	-0.633413	-1.90527	0.0224267	0.643463	1.22583	0.683117	0.793418	0.515316	0.92513	0.339046	0.152908	-0.930332	-0.702859	0.586876	2.02671	1.62631	1.12698	1.36181	-0.490812
EFNA5	no	no	no	no	yes	-0.0961956	-0.147567	-0.632102	-0.0954266	-0.657919	0.187219	0.120947	-0.951763	-0.188896	-0.490987	0.343	0.107039	-0.506966	-0.188169	-0.847926	2.07873	1.24018	-1.05819	0.90527	-1.45373	1.8396	1.19997	0.129032	1.02331	-1.97214	1.24976	1.07855	-0.761837	0.196849	-1.64965
NOC4L	no	no	yes	no	no	0.315242	0.0303754	-1.21356	-0.181522	-0.589654	0.0191642	0.180969	-1.956	-0.71751	-0.911928	0.197998	0.548976	-1.2393	0.389309	0.420057	0.577833	1.11368	0.831666	1.1744	-0.96761	0.21349	0.634468	-0.487876	0.557018	-0.536662	1.3867	1.71342	0.206366	1.06983	-2.77935
PURA	no	no	no	no	yes	-0.236796	-0.162098	-0.742915	-0.0412996	0.0240134	0.279509	0.46825	-1.6632	1.32773	0.0703228	0.832675	0.571747	0.166372	1.10974	0.627797	-1.70326	-0.394393	-0.0302249	0.489388	-0.887684	1.05606	-0.107399	-0.323701	1.68396	-0.320269	-2.05518	-0.952563	-1.31493	-0.162672	2.39101
PRMT3	no	no	yes	no	no	-1.95057	-0.946205	-0.0661367	-0.0423556	-0.602138	-0.232799	-0.423546	-0.971028	-0.688606	-0.460676	-1.41152	-0.208913	0.876632	-1.33069	-0.39289	0.44518	1.75127	-0.400126	1.5971	0.948911	1.35033	1.68494	0.262455	1.28723	-1.21843	0.538504	0.425815	-1.03489	0.212008	1.00113
KIF18B	no	no	no	yes	no	0.109631	0.089733	-1.07262	-0.313908	-0.771877	-0.455829	0.0201615	-0.78722	0.0389493	-0.761965	0.473374	0.126114	-0.888784	0.218868	-0.369849	1.15009	1.07437	-0.20323	1.21708	-2.29547	1.38676	0.863123	-0.349766	1.16199	-1.51751	1.39046	1.36695	-0.143742	1.1534	-1.90928
KATNA1	no	no	no	no	yes	-0.477452	-1.32722	-0.316977	0.0912328	0.289328	0.298938	0.0515083	-0.279432	-1.56433	-1.32294	-0.779858	-0.0793176	-0.243002	-1.35015	-0.0902173	-0.398987	-0.264852	2.07833	1.11051	0.586838	1.05053	0.303804	-0.387753	2.77529	-0.961029	1.27415	-0.35848	-0.851072	1.17067	-0.0280628

## Sheet: ED7E
25 uM EPI-001 vs DMSO, 24 hr
Pathway	Set Size	p-adjusted	Direction	Gene Ratio	Count
HALLMARK_E2F_TARGETS	198	0.00305717	suppressed	0.80303	159
HALLMARK_MYC_TARGETS_V1	195	0.00305717	suppressed	0.707692	138
HALLMARK_ANDROGEN_RESPONSE	98	0.00305717	suppressed	0.581633	57
HALLMARK_G2M_CHECKPOINT	195	0.00305717	suppressed	0.74359	145
HALLMARK_MYC_TARGETS_V2	58	0.00305717	suppressed	0.775862	45
HALLMARK_ALLOGRAFT_REJECTION	179	0.0361614	activated	0.111732	20
HALLMARK_INFLAMMATORY_RESPONSE	191	0.0446961	activated	0.277487	53
5 uM 1ae vs DMSO, 24 hr
Pathway	Set Size	p-adjusted	Direction	Gene Ratio	Count
HALLMARK_E2F_TARGETS	198	0.0026137	suppressed	0.848485	168
HALLMARK_MYC_TARGETS_V1	195	0.0026137	suppressed	0.692308	135
HALLMARK_MYC_TARGETS_V2	58	0.0026137	suppressed	0.793103	46
HALLMARK_ANDROGEN_RESPONSE	98	0.0026137	suppressed	0.561224	55
HALLMARK_G2M_CHECKPOINT	195	0.0026137	suppressed	0.728205	142
HALLMARK_INFLAMMATORY_RESPONSE	191	0.00542711	activated	0.230366	44

## Sheet: EDF7F
AR LNCaP with/without CHX and 1ae
			Run1	Run2	Run3	Run4	P value (ttest)
DMSO w/o CHX			100	100	100	100
DMSO with CHX				41	35	49
15 µM 1ae with CHX				37	49	36	0.871951
15 µM 1ae w/o CHX					36	24	4.4719e-05
25 µM 1ae with CHX			12		2	6	0.00217391
25 µM 1ae w/o CHX					1	2	5.60171e-10
