# Supplementary material for: Rational optimization of a transcription factor activation domain inhibitor
Source: Nat Struct Mol Biol. 2023 Dec 4;30(12):1958–69. doi: 10.1038/s41594-023-01159-5 (PMC10716049; doi:10.1038/s41594-023-01159-5)
Supplement: Supplementary file 26 — Statistical source data. [file 41594_2023_1159_MOESM26_ESM.xlsx]

## Sheet: EDF8A
* Data represents mean normalized expression using SDHA as housekeeping gene
LNCaP
AR
CMC-Control	ENZA	1ae
12.7674	9.69146	6.58778
5.55681	10.2124	6.4137
7.51132	7.67356	5.6996
KLK2
CMC-Control	ENZA	1ae
3.45815	0.61903	2.98654
6.95071	0.54052	2.45327
8.98047	0.27611	2.4529
KLK3
CMC-Control	ENZA	1ae
15.9627	2.8686	13.8484
25.8358	1.5235	10.1533
24.9261	1.27834	13.0431
FKBP5
CMC-Control	ENZA	1ae
1.21199	0.50186	0.72101
1.54087	0.60347	0.58304
1.49244	0.33675	0.43385
NKX3.1
CMC-Control	ENZA	1ae
7.74622	3.00973	4.68597
4.23881	4.47748	4.11039
3.76627	3.181	4.71158
ALAS1
CMC-Control	ENZA	1ae
1.33132	1.78837	2.08048
1.21529	1.70996	1.12482
1.3511	1.40108	1.18608

## Sheet: EDF8B
* Data represents mean normalized expression using SDHA as housekeeping gene
LN95
AR
CMC-Control	ENZA	1ae
1.52634	2.98394	2.04789
1.84731	2.29254	2.0821
1.74107	2.39751	1.79463
AR-V7
CMC-Control	ENZA	1ae
0.82022	1.22111	1.35424
0.71585	1.33486	0.88809
0.79898	1.17035	1.01113
CCNA2
CMC-Control	ENZA	1ae
0.37444	0.25917	0.21426
0.32613	0.24456	0.24686
0.26108	0.28365	0.1892
UBE2C
CMC-Control	ENZA	1ae
0.19271	0.16242	0.05731
0.23419	0.16357	0.08855
0.1431	0.17321	0.08393
B4GALT1
CMC-Control	ENZA	1ae
0.03217	0.03402	0.06487
0.03745	0.04206	0.04743
0.02863	0.04187	0.04862
ALAS1
CMC-Control	ENZA	1ae
0.19355	0.19203	0.16114
0.19705	0.15493	0.15255
0.1305	0.13158	0.21224
